# Supplementary material for: The microbiome interacts with the circadian clock and dietary composition to regulate metabolite cycling in the Drosophila gut
Source: eLife journal article supplement (doi:10.7554/elife.97130), 2024-05-01
Supplement: supp1 [file elife-97130-supp1-v1.zip]

## Sheet: unique cycling in AS
ID	CycID	JTK_pvalue	JTK_BH.Q	JTK_period	JTK_adjphase	JTK_amplitude	LS_pvalue	LS_BH.Q	LS_period	LS_adjphase	LS_amplitude	meta2d_pvalue	meta2d_BH.Q	meta2d_period	meta2d_phase	meta2d_Base	meta2d_AMP	meta2d_rAMP	X0	X0.1	X0.2	X0.3	X6	X6.1	X6.2	X6.3	X12	X12.1	X12.2	X12.3	X18	X18.1	X18.2	X18.3	AS
10	1,7-Dimethyluric acid	0.00164724	0.0199233	18	0	309.359	0.0365639	1	24.2975	17.9999	1373.5	0.000645502	0.0162501	21.1488	18.408	1136.28	364.522	0.320804	1844	1230	1578	1428	804	891	885	1005	908	767	955	1116	1331	1364	1305	1494	1181.56
20	2'-Deoxyadenosine	0.00421867	0.0379768	18	0	16964.9	0.294236	1	27.8233	17.9999	23427.7	0.00954747	0.092278	22.9117	18.867	27709.6	17717.9	0.639412	36710	43012	61576	80630	2360	14104	19247	18793	24033	16063	17966	28181	18694	19117	20387	35513	28524.1
21	2'-Deoxyguanosine	0.00267199	0.0280139	18	0	176.777	0.44178	1	28	12	314.75	0.00913877	0.0891236	23	4.92857	349.809	279.027	0.797656	432	505	707	806	93	261	227	192	255	257	275	472	249	262	276	420	355.562
32	3-Amino-1-propanol	0.00164724	0.0199233	24	0	6722.64	0.0770226	1	24.4321	6.63e-05	61073.2	0.00126523	0.0243487	24.2161	3.29e-05	54740.7	7679	0.14028	63920	58742	62484	59147	52861	50470	46290	52632	54856	45441	45754	52639	56437	53717	56131	63481	54687.6
76	Acetyl-L-threonine	0.000320124	0.00696552	18	0	327.744	0.506642	1	26.3284	17.9999	1380.5	0.00157756	0.0283385	22.1642	18.6586	1373.55	379.777	0.276494	1615	1698	1776	2524	517	1234	1183	1138	1296	1338	1235	1379	1309	1525	1161	1527	1403.44
82	Ala-Ala-Arg	0.0210199	0.109923	18	3	460.327	0.404942	1	20	6.63e-05	5295.5	0.0490817	0.281862	19	1.58336	5050.43	598.158	0.118437	5599	4978	4895	5710	4173	5805	5201	5057	4500	4440	4666	4609	5773	5895	5732	5397	5151.88
86	Ala-Asp	4.22e-05	0.00240315	18	0	1867.12	0.493457	1	26.8085	17.9999	11211.7	0.000245187	0.00925533	22.4043	18.7235	11320.5	3617.08	0.319514	11622	12849	19255	22389	3451	10250	9467	10167	10381	9643	10585	10164	10811	10967	12358	10711	11566.9
88	Ala-Glu	0.00980952	0.0660579	24	0	986.237	0.624619	1	27.1385	18	8504	0.0373455	0.234697	25.5692	21.2642	9126.25	2532.51	0.277498	9164	9016	12933	19637	3362	7895	8833	7699	7330	7672	7847	7752	7412	8987	8450	9167	8947.25
101	Ala-Thr	0.00980952	0.0660579	18	0	3013.16	0.345167	1	27.4766	17.9999	13337.2	0.0226455	0.169352	22.7383	18.8171	14091.4	3914.57	0.277798	16464	14125	25532	24894	8093	13016	12163	11879	14357	11253	10990	12698	14349	12920	12752	13328	14300.8
107	alpha-Galactosamine-1-phosphate	0.000572095	0.00994847	18	0	322.971	0.535099	1	26.9725	17.9999	982.249	0.00278316	0.0404762	22.4862	18.7462	1038.88	518.267	0.498869	1342	1041	1563	3418	487	822	761	681	675	720	841	877	1013	1018	793	1105	1072.31
108	Androstane-3,17-diol	0.0299489	0.138103	24	3	355.321	0.532875	1	25.5652	6.63e-05	1311.75	0.0819933	0.390573	24.7826	1.54895	1008.6	264.949	0.262689	1274	1434	1215	1324	1223	2208	527	850	1046	688	650	591	753	779	728	800	1005.62
149	Biliverdin	0.0144977	0.086706	24	3	68.2358	0.998401	1	20	5.85e-05	259.75	0.0757795	0.370763	22	1.37503	216.34	162.925	0.753095	161	190	391	297	277	170	152	183	73	59	121	148	127	74	134	1043	225
193	DL-o-Tyrosine	0.00215962	0.0260478	18	0	74.2462	0.665524	1	28	17.9999	315.75	0.0108443	0.101198	23	18.8928	470.428	361.923	0.769348	356	312	1697	2057	217	230	223	210	370	271	293	272	304	387	342	230	485.688
194	DMSO	0.0419656	0.170301	18	0	485.252	0.966189	1	28	17.9999	3360.25	0.170511	0.622517	23	18.8928	14342.7	19126.3	1.33352	3354	3751	21077	176024	2726	3341	3110	3049	2533	3270	3409	3300	3283	3410	2865	3883	15149.1
211	gamma-Glutamyltyrosine	0.0210199	0.109923	18	0	3487.45	0.465219	1	26.9725	17.9999	19239.5	0.0550308	0.299727	22.4862	18.7462	19520.1	3741.8	0.19169	23273	22630	26966	27029	8543	18431	18289	19972	18546	18393	17594	19559	18075	19258	20166	19459	19761.4
227	Glucose-1-phosphate	0.00164724	0.0199233	18	9	518.84	0.046655	1	24.0327	6	2379.5	0.00080492	0.0186144	21.0163	7.87756	2025.27	511.392	0.252506	1351	1315	1752	1646	1908	2749	2225	2636	2357	2175	2437	2163	1464	1678	1885	1597	1958.62
228	Glucose-6-phosphate	0.000572095	0.00994847	18	9	896.965	0.0538009	1	23.7736	6	3479.5	0.000350534	0.0111604	20.8868	7.85741	2737.65	955.089	0.348872	1520	1400	2130	2137	2747	4095	3359	3717	3402	3241	3292	2481	1554	2231	2558	1870	2608.38
237	Glu-Phe	0.000572095	0.00994847	18	0	1896.46	0.651216	1	25.4179	17.9999	16119.5	0.00331394	0.0445631	21.7089	18.5412	15498.7	3306.96	0.213371	17319	15310	19962	26699	7110	14693	14144	13625	14581	14370	14842	16085	16038	16380	15321	16739	15826.1
241	Glu-Tyr	0.000572095	0.00994847	18	0	1426.94	0.542857	1	26.6465	17.9999	8097.75	0.00281904	0.0407581	22.3233	18.7014	8129.36	1916.13	0.235705	9741	9125	10618	13820	3201	7199	7838	7203	7890	7327	7936	7978	7663	8563	8364	7801	8266.69
245	Glyceric acid	1.34e-05	0.00149119	18	0	882.823	0.0571161	1	24.4321	17.9999	2319.75	1.16e-05	0.00135385	21.2161	18.4233	1903.86	879.332	0.461867	2631	3115	2583	3360	691	1302	1363	1396	1396	1378	1648	2025	2225	2089	2122	2843	2010.44
254	Gly-Pro	0.000171384	0.00472671	18	0	1187.23	0.152422	1	20	18	6528.25	0.000301789	0.0101298	19	18.05	5788.33	1132.4	0.195634	7469	6796	6530	7976	3255	5791	5432	4388	5575	5316	5613	6296	6299	6773	6267	6774	6034.38
255	Gly-Pro-Ala	0.000320124	0.00696552	18	0	924.542	0.244268	1	25.2722	17.9999	3787.5	0.000817641	0.0187322	21.6361	18.5231	3495.13	976.474	0.279382	4611	3606	4473	6255	1702	3100	3086	3094	3256	2737	3099	3351	3273	4192	3763	3922	3595
262	Gly-Tyr	0.000320124	0.00696552	18	0	2139.35	0.26569	1	25.8651	17.9999	11334	0.000882197	0.0193925	21.9326	18.5979	10976.4	2235.95	0.203706	13029	12134	15845	14940	5672	10449	9972	10707	10994	9911	9140	10677	11507	10859	11705	11265	11175.4
266	Guanine	4.22e-05	0.00240315	18	0	558.968	0.515508	1	27.3065	12	1207.25	0.000255193	0.00928559	22.6533	4.97755	1291.18	888.095	0.687818	1484	1850	2009	3000	391	943	1003	726	1060	1059	1094	1616	1175	1138	1114	1389	1315.69
267	Guanosine	0.0144977	0.086706	18	0	2297.04	0.552451	1	20	17.9999	20484.2	0.0466713	0.273709	19	18.05	19352.5	2059.7	0.106431	23472	22224	17233	25030	13233	18266	17819	16941	20424	18308	18873	23040	20648	20795	19132	21362	19800
271	Hexanoyl-L-carnitine	0.0065055	0.0504817	18	9	7082.74	0.267403	1	26.1721	6	16121.2	0.0127931	0.112819	22.0861	8.05315	12105.4	4513.84	0.372878	5984	2871	6335	6807	18633	15890	16979	12983	17757	17043	10488	8683	10736	14713	12097	9477	11717.2
310	Ile-Val-Arg	0.00980952	0.0660579	18	0	209.304	0.556246	1	27.3065	17.9999	897	0.0338901	0.220261	22.6533	18.7929	947.982	329.245	0.347312	1046	865	1967	1920	542	777	786	628	860	662	902	926	1057	767	791	973	966.812
314	Isoleucine	0.000572095	0.00994847	18	0	48606.9	0.171242	1	20	18	260019	0.00100229	0.0207651	19	18.05	231177	45778.8	0.198024	301947	293978	233778	326301	139330	219238	208048	185577	230237	211409	209903	258163	251566	274771	249388	264353	241124
319	Kynurenine	0.00267199	0.0280139	24	21	417.547	0.111952	1	22.2166	17.9999	2524.25	0.00272651	0.0399215	23.1083	19.4711	2084.07	427.72	0.205233	2553	1980	1903	2550	1385	1791	1705	1399	1764	1899	2220	2371	2137	2703	2299	2958	2101.06
326	Leu-Asn	0.000987235	0.0140155	18	0	7433.28	0.434582	1	25.4179	18	36658	0.00375576	0.048585	21.7089	18.5412	34871.3	7316.48	0.209814	41420	39107	44887	51664	16161	35244	30564	32618	37333	25153	30617	38131	38711	34123	35606	38192	35595.7
333	Leu-Leu-Lys	0.0144977	0.086706	18	0	592.379	0.819641	1	27.1385	17.9999	2295	0.0645558	0.337593	22.5692	18.7693	2376.87	767.236	0.322793	2577	2643	2954	5857	1656	2053	1784	1378	2324	1449	2355	2567	3089	1701	1843	2547	2423.56
355	Lys-Met	0.0419656	0.170301	18	3	446.538	0.706976	1	24.4321	17.9999	6646.49	0.134033	0.532443	21.2161	20.1913	5726.9	788.302	0.137649	6548	5406	5758	7088	2349	6207	5957	6067	5881	4789	5112	5486	7273	6409	6541	6363	5827.12
374	Methionine	0.00164724	0.0199233	18	0	21807.5	0.211084	1	20	17.9999	113563	0.00311689	0.0425746	19	18.05	100808	19981.6	0.198213	134557	135808	96367	137154	61612	97236	93950	77413	98159	92403	93958	109528	104825	123565	109999	115863	105150
383	Methylsuccinic acid	0.0254844	0.132629	18	0	479.418	0.782997	1	28	12	2517	0.0980613	0.4359	23	4.92858	2497.88	584.573	0.234027	2944	2927	2904	3192	2432	2190	1806	2149	2983	2235	2547	2303	2149	2577	2550	2271	2509.94
415	N-Acetylhistidine	0.00164724	0.0199233	18	0	365.928	0.462824	1	25.1282	17.9999	2056.75	0.00623557	0.0693911	21.5641	18.5055	1913.13	524.745	0.274286	1838	2034	2858	3574	1288	1619	1373	1484	1802	1553	1841	2005	1946	1964	1937	2380	1968.5
428	Nitrazepam	0.00421867	0.0379768	24	9	348.604	0.260744	1	23.52	6.00002	871	0.00859363	0.0857383	23.76	7.48562	484.255	390.791	0.806995	190	197	186	738	582	1497	356	1049	317	968	703	389	220	65	115	112	480.25
430	N-Lauroyl-L-arginine	0.0065055	0.0504817	24	0	1867.12	0.137735	1	24.4321	6.63e-05	9397.48	0.00718401	0.0764105	24.2161	3.29e-05	7457.41	2330.14	0.31246	10077	6440	10853	10220	4846	7690	6271	6921	6508	5184	5305	6125	6603	8778	9486	7754	7441.31
440	Octanoylcarnitine	0.00421867	0.0379768	18	9	2098.52	0.362724	1	25.4179	5.99999	4564.75	0.0114496	0.10484	21.7089	7.98947	3046.62	1513.26	0.4967	1043	559	1132	1225	6593	4039	4060	3567	4508	4232	2342	1931	2616	3399	3041	1987	2892.12
450	Pantothenic acid	1.91e-05	0.00150306	18	0	53119.1	0.131562	1	25.4179	17.9999	128194	3.49e-05	0.00269852	21.7089	18.5412	116022	50319.5	0.433708	153784	158843	173421	237733	62988	83124	77761	71319	98891	88426	98509	118486	111430	128176	113082	160089	121004
451	Pantothenic acid	2.89e-06	0.0004463	18	0	59919.9	0.124112	1	25.5652	17.9999	137539	5.67e-06	0.000877519	21.7826	18.5596	127186	52483.3	0.412652	171519	173086	207808	229665	62400	92000	83203	83049	111159	96719	119508	135070	116533	137026	139899	156698	132209
453	Phe-Ala a	0.00267199	0.0280139	18	0	207280	0.292131	1	20	17.9999	1.20772e+06	0.00636595	0.0699608	19	18.05	1.09209e+06	192075	0.175879	1466624	1415663	1049136	1420019	608493	1038586	1053106	890048	1123711	1036551	1048274	1160039	1141765	1307780	1124351	1256994	1.13382e+06
484	Pro-Glu a	0.000987235	0.0140155	18	0	1265.01	0.202642	1	24.9858	17.9999	4780.99	0.00190391	0.0316674	21.4929	18.4883	4232.21	1507.09	0.3561	5383	5417	5037	8471	1798	3552	3428	3357	3516	3290	3928	4036	3882	5501	4483	5258	4396.06
491	Pro-Lys	0.0419656	0.170301	18	0	913.228	0.862525	1	25.8651	18	6314.75	0.156325	0.589213	21.9326	18.5979	6243.49	1230.29	0.197051	6161	6804	7760	10968	3333	5670	5041	5902	5918	5519	6887	6426	5814	7452	5377	6616	6353
494	Pro-Pro	0.000572095	0.00994847	18	0	13616.4	0.143126	1	24.0327	17.9999	65504.9	0.000852408	0.0192342	21.0163	18.3786	56290.6	15797.5	0.280641	75926	57835	66488	93344	33026	50566	42846	46765	57806	41970	50609	54362	58594	65109	62307	76010	58347.7
509	Pyroglutamic acid	0.0144977	0.086706	18	3	8163.37	0.200277	1	23.9024	6.63e-05	142457	0.0198656	0.1548	20.9512	1.74596	130826	17008.4	0.130008	159518	129664	145920	134725	113436	140752	109500	128284	129331	108098	109377	130015	145302	147392	148856	134846	132188
516	Ribose A	0.000171384	0.00472671	18	0	2699.2	0.0382677	1	24.4321	17.9999	9907.74	8.48e-05	0.00459957	21.2161	18.4233	8405.45	2695.38	0.320671	12845	9767	12051	10867	5759	6196	6287	7416	7087	5476	7438	8894	10113	9715	9670	10133	8732.12
517	Ribose B	0.000171384	0.00472671	18	0	534.042	0.13465	1	25.5652	17.9999	1964.5	0.000269461	0.00940942	21.7826	18.5596	1823.19	609.88	0.334513	3007	3165	2188	2132	1003	1471	1567	1378	1563	1540	1429	1804	2035	2197	1992	1634	1881.56
533	Ser-Met	0.000987235	0.0140155	18	0	4396.44	0.37604	1	24.9858	18	24455	0.00330353	0.0445617	21.4929	18.4883	23162.4	4113.49	0.177594	28056	28275	27513	29274	11214	22120	21805	23090	22843	19130	21092	25521	23992	24988	23248	25592	23609.6
574	trans-Cinnamic acid	0.000572095	0.00994847	18	0	3341.43	0.294742	1	20	17.9999	21610.5	0.00163357	0.0287535	19	18.05	19699.7	3440.6	0.174652	27775	25418	18813	24922	11268	18124	18199	16630	20656	18802	19379	20729	21092	22388	19927	23035	20447.3
591	Tryptophan	0.00267199	0.0280139	18	0	28887.8	0.371864	1	20	17.9999	132896	0.00786366	0.0813165	19	18.05	119023	25773.1	0.216539	176521	164603	105123	167923	58850	114598	103761	93876	115035	112196	117398	132489	125435	147696	121472	136983	124622
620	unknown1014	0.00980952	0.0660579	18	0	359.917	0.583673	1	20	17.9999	2941.75	0.0352855	0.225017	19	18.05	2771.43	339.733	0.122584	3362	3308	2971	3279	1471	2797	2798	2402	2627	2880	2670	3192	3130	2928	2660	3049	2845.25
627	unknown1020	8.77e-05	0.00321778	18	0	2248.95	0.146939	1	20	17.9999	14783.7	0.000157964	0.00712483	19	18.05	13285.5	2089.08	0.157245	16266	16688	15215	14782	8466	13230	12227	10983	11491	14342	12444	14561	15057	14487	14604	14987	13739.4
628	unknown1021	0.00421867	0.0379768	18	0	336.406	0.0525586	1	23.7736	17.9999	3632.5	0.00208736	0.0340356	20.8868	18.3505	3298.23	411.258	0.12469	3971	3783	3673	3264	2977	3025	2745	3200	3366	3047	2960	3126	3515	3518	3697	3800	3354.19
629	unknown1022	0.00421867	0.0379768	18	0	2152.08	0.156457	1	24.1644	17.9999	19190.5	0.00549364	0.0637706	21.0822	18.3931	18135.2	1803.89	0.0994689	20941	20725	19979	18694	15378	18203	15602	17625	17457	17672	15478	19320	18857	18989	19532	19384	18364.8
698	unknown1085	0.00267199	0.0280139	18	0	562.15	0.548689	1	28	17.9999	3934.75	0.0110326	0.102075	23	18.8928	5013.95	2602.91	0.519134	4154	4132	14645	15598	3187	3572	3348	3704	3811	3184	3398	3507	3926	4218	3895	3700	5123.69
701	unknown1088	0.0210199	0.109923	18	0	114.198	0.66294	1	28	17.9999	1180	0.0734838	0.364469	23	18.8928	1532.8	759.38	0.495421	1217	1147	4392	4848	927	1042	1102	1085	1138	1044	1205	1170	1191	1278	1254	997	1564.81
705	unknown1091	0.0210199	0.109923	18	15	207.536	0.414544	1	20	12	3745.75	0.0500414	0.283983	19	13.6167	3542.53	325.385	0.0918512	3661	3698	3480	3534	3522	3358	3316	2701	3588	3579	3936	3880	3659	3429	3432	3857	3539.38
707	unknown1093	0.0359573	0.164931	18	0	353.907	0.74002	1	27.8233	12	2816.75	0.123107	0.503889	22.9117	4.94082	2897.12	764.704	0.263953	3180	2822	4060	4329	1722	2778	2659	2674	2972	2563	2822	2910	2685	2684	2749	3019	2914.25
733	unknown1116	0.00421867	0.0379768	24	12	632.861	0.222457	1	26.6465	12	4546.75	0.00748081	0.0782413	25.3233	12.0329	3655.23	1176.09	0.321756	3651	3504	763	670	3753	4772	4304	4278	5007	4059	4601	4520	4456	3241	3922	3811	3707
734	unknown1117	0.00164724	0.0199233	18	0	1693.52	0.10834	1	24.8451	17.9999	7149.49	0.00171879	0.0295332	21.4225	18.4714	6465.81	1585.32	0.245184	8366	6887	9120	9063	3286	6243	5982	5744	6364	5251	5427	5960	7328	6849	7003	7418	6643.19
745	unknown1127	0.0210199	0.109923	24	3	328.274	0.549118	1	28	17.9999	3544.5	0.0630414	0.332484	26	22.9821	3901.78	736.573	0.188779	4322	4165	5739	6315	1397	3663	3680	3974	3558	3562	3195	3647	3272	3639	3531	3736	3837.19
780	unknown1159	3.06e-05	0.00232726	18	0	453.255	0.563485	1	28	17.9999	1930.5	0.000206585	0.00847507	23	18.8928	2476.9	1585.52	0.640121	2172	2194	7107	9119	857	1603	1587	1538	1750	1542	1603	1906	1785	2157	1964	1816	2543.75
781	unknown116	8.77e-05	0.00321778	24	0	1089.47	0.0199569	1	24.4321	6.63e-05	5012.99	2.49e-05	0.00220459	24.2161	3.29e-05	3953.12	1284.04	0.324818	4765	4634	5254	5399	3096	3723	2860	3446	2923	2690	3085	3664	4719	4416	4283	4151	3944.25
821	unknown1196	0.00980952	0.0660579	18	0	674.226	0.309146	1	26.3284	17.9999	3564.5	0.0206165	0.158842	22.1642	18.6586	3529.94	572.511	0.162187	3983	4246	4537	4537	2125	3536	3283	3264	3534	3039	3137	3721	3697	3660	3469	3432	3575
833	unknown1206	0.000320124	0.00696552	18	0	4663.55	0.11714	1	25.1282	17.9999	21026.2	0.000419662	0.012619	21.5641	18.5055	19383.8	4907.25	0.253162	23141	22850	26112	29951	10392	17521	16473	18072	17344	15998	16726	19741	19567	22423	20618	21497	19901.6
861	unknown1231	0.0065055	0.0504817	18	0	974.747	0.627288	1	26.1721	17.9999	6510.25	0.0265313	0.187956	22.0861	18.6379	6465.89	988.603	0.152895	7258	8774	7225	8026	3461	6441	6267	5848	6646	5790	6132	6845	6736	6340	6525	6440	6547.12
882	unknown1250	0.0419656	0.170301	18	0	4026.09	0.670417	1	27.8233	12	16745.2	0.128596	0.519488	22.9117	4.94082	17988.4	7855.33	0.436689	20028	21201	25147	35816	5316	17833	16198	15160	15506	14598	16816	20061	14684	17808	17582	16876	18164.4
883	unknown1251	0.0144977	0.086706	18	0	662.736	0.825284	1	20	17.9999	4438.5	0.0649182	0.338025	19	18.05	4276.7	640.553	0.149777	4790	5495	4677	6233	1787	4068	4629	3733	4460	3920	3980	5128	4479	4510	4517	4248	4415.88
921	unknown1286	0.00980952	0.0660579	18	0	1118.11	0.424731	1	26.1721	17.9999	7384.99	0.0270013	0.190416	22.0861	18.6379	7192.16	1831.81	0.254695	8301	7126	10527	12988	3119	6174	6764	7221	6949	6146	6299	6329	7175	7631	7135	7599	7342.69
924	unknown1289	8.88e-07	0.000256336	18	0	1187.94	0.344459	1	25.5652	17.9999	4613.75	4.89e-06	0.000815057	21.7826	18.5596	4328.43	1550.28	0.358162	5365	5032	6283	8772	1167	3365	3525	3672	4097	3882	4172	3842	4766	4919	4103	4667	4476.81
929	unknown1293	0.000572095	0.00994847	18	0	1234.25	0.435469	1	26.6465	18	6426	0.00231629	0.036471	22.3233	18.7014	6452.31	1971.73	0.305585	6874	7424	9671	13267	2623	5585	5578	5812	6354	5457	5772	5377	6314	6548	6208	6634	6593.62
950	unknown1311	0.0144977	0.086706	24	0	1456.29	0.531414	1	27.1385	17.9999	12043.5	0.0451932	0.26789	25.5692	21.2642	12657.3	2380.95	0.188108	14454	14865	15854	18914	4442	11994	12094	13243	11513	12114	11231	10933	11861	12459	12296	11558	12489.1
955	unknown1316	0.000987235	0.0140155	24	0	1064.73	0.504471	1	25.2722	18	9906	0.00428548	0.0533222	24.6361	21.0915	9655.62	1509.02	0.156284	12332	11504	10283	11412	4291	9458	8998	10053	9513	9124	8672	8521	9835	9865	9760	10164	9611.56
971	unknown1330	0.00980952	0.0660579	18	0	744.937	0.443996	1	27.3065	17.9999	3428.75	0.0280328	0.195777	22.6533	18.7929	3567.62	1009.82	0.283051	4129	4099	5313	6840	1222	3051	3267	3543	3399	3040	3124	3264	3314	3783	3471	3147	3625.38
983	unknown1341	0.0210199	0.109923	18	0	557.907	0.882485	1	20	12	5267.75	0.092513	0.420779	19	15.2	5140.14	913.71	0.17776	6151	6787	5514	5749	2697	5210	4723	5081	5450	4812	5319	5490	5408	4680	5004	5649	5232.75
988	unknown1346	0.00421867	0.0379768	24	0	1423.76	0.443655	1	24.9858	17.9999	13268.2	0.0136273	0.118249	24.4929	21.0689	12815.4	1788.75	0.139578	15361	15719	13529	14402	6971	12491	12384	12996	12446	11162	11609	12255	12919	14063	11729	14362	12774.9
996	unknown1353	0.00980952	0.0660579	24	12	790.899	0.431225	1	26.3284	12	12838	0.0273499	0.192248	25.1642	12.0257	11532.5	1478.52	0.128205	11984	11854	7421	7398	9774	12484	12298	13441	13025	12680	12582	13065	12235	11373	11506	12315	11589.7
1001	unknown1358	0.0144977	0.086706	24	12	1048.99	0.302939	1	24.7059	12	8655.75	0.0282312	0.196314	24.3529	12.0025	6779.44	2041.22	0.301089	6910	7967	1761	2231	7046	7566	6119	7717	8685	8312	9398	8228	7486	5492	7444	6489	6803.19
1002	unknown1359	0.0065055	0.0504817	18	0	1014.34	0.535084	1	27.6489	17.9999	4192.75	0.0231849	0.172789	22.8245	18.8418	4377.17	925.135	0.211355	5457	4952	5981	6694	1959	4182	3957	4077	4566	4341	3495	4339	4150	3563	4458	4600	4423.19
1010	unknown1366	0.000572095	0.00994847	24	21	774.459	0.119727	1	23.0287	17.9999	4150.99	0.000725279	0.0172553	23.5144	19.4773	3470.25	926.11	0.266871	5145	4137	3348	3596	1435	3018	2801	3112	3458	3226	2848	3111	4207	3944	4307	4146	3489.94
1013	unknown1369	0.00980952	0.0660579	24	12	721.602	0.137629	1	24.9858	12	4659.75	0.0102708	0.0973142	24.4929	12.0049	3712.01	1055.05	0.284226	3086	3856	1584	1963	3341	4623	3690	4084	4300	4595	5389	4355	4508	3378	3655	3260	3729.19
1022	unknown1377	0.0299489	0.138103	24	12	359.564	0.312799	1	22.7907	12	3448.25	0.0531208	0.294511	23.3953	12.008	3076.01	447.788	0.145574	2717	2709	2572	3046	2436	3665	3163	3372	3527	3407	3662	3197	3082	3058	2899	2565	3067.31
1024	unknown1379	0.000320124	0.00696552	24	12	4205.52	0.066866	1	25.4179	12	20054.5	0.000251554	0.00925533	24.7089	12.0099	15711.9	5726.79	0.364488	12218	14724	5231	6531	17408	20533	17043	18410	19507	19747	21794	19170	19034	13911	15368	12913	15846.4
1035	unknown1389	0.0210199	0.109923	18	3	758.018	0.858111	1	20	6.63e-05	11619.7	0.090463	0.413191	19	1.58336	11219.4	885.264	0.0789045	11949	11408	11374	11748	14222	11193	10126	10138	10257	10064	10566	10652	11885	12348	11493	12490	11369.6
1058	unknown1409	0.0299489	0.138103	24	3	230.163	0.913572	1	26.0177	17.9999	4985	0.125822	0.512519	25.0088	22.7185	4995.53	453.3	0.0907412	5610	5829	5204	5830	2582	5131	4858	5294	5076	4728	4617	4910	4822	5080	4991	5047	4975.56
1090	unknown1438	0.00815751	0.0629626	24	0	645.942	0.847639	1	26.1721	17.9999	8926.25	0.0413088	0.252281	25.0861	21.1695	8982.74	1117.42	0.124396	9665	9954	10001	12048	4118	9138	9048	9177	8564	8099	8274	9049	7937	9138	9481	9149	8927.5
1091	unknown1439	0.000320124	0.00696552	18	0	445.124	0.576831	1	27.1385	17.9999	2409	0.00177216	0.0302105	22.5692	18.7693	2493.86	815.54	0.327019	2719	2621	3883	5601	948	2267	2019	2084	2434	2106	2046	2332	2140	2468	2645	2383	2543.5
1097	unknown1444	0.0299489	0.138103	24	0	241.123	0.551587	1	28	17.9999	1590	0.0843023	0.39634	26	21.3571	2145.69	1100.82	0.513041	1750	1738	5668	6464	710	1426	1559	1437	1384	1292	1432	1541	1396	1752	1767	1445	2047.56
1100	unknown1447	0.0210199	0.109923	24	3	710.642	0.734491	1	27.3065	17.9999	8469.75	0.0798325	0.382383	25.6533	22.885	8827.1	1219.89	0.138198	10430	9500	9978	12866	3760	8506	8852	9308	7903	8103	7979	8755	7834	9004	8782	8259	8738.69
1139	unknown1482	0.0299489	0.138103	18	0	472.701	0.840559	1	25.4179	17.9999	3453.25	0.117863	0.489305	21.7089	18.5412	3350.65	488.346	0.145747	4366	4060	3546	3957	1386	3705	3249	3265	3386	2742	3330	3579	3469	3588	3311	3445	3399
1163	unknown1503	0.00421867	0.0379768	18	6	721.072	0.967891	1	20	6	4935.5	0.0265444	0.187956	19	6.01667	4527.95	447.76	0.098888	4799	3434	3772	4361	5144	5216	4288	5094	4087	2751	3401	3980	4910	4908	4992	6442	4473.69
1178	unknown1517	0.0065055	0.0504817	24	3	339.058	0.551212	1	28	17.9999	3254	0.0237772	0.174797	26	22.9821	3706.41	889.154	0.239896	3789	3610	6103	7299	1217	3574	3521	3577	3271	3116	2825	3137	3107	3516	3297	3096	3628.44
1192	unknown153	0.00164724	0.0199233	18	0	385.02	0.456366	1	27.1385	17.9999	1264.25	0.00615914	0.0692703	22.5692	18.7693	1382.56	831.798	0.601635	1415	1263	3812	4230	518	836	805	1059	1047	979	799	1111	1001	1361	1567	1128	1433.19
1194	unknown1531	0.00980952	0.0660579	24	0	586.015	0.135881	1	24.2975	6.63e-05	4104.99	0.0101574	0.0970487	24.1488	3.3e-05	3566.96	684.08	0.191782	4730	3993	3792	3905	2985	3702	2779	3291	3651	3197	2884	2754	4040	3344	3793	4179	3563.69
1195	unknown1532	0.0419656	0.170301	24	21	431.512	0.224836	1	24.2975	17.9999	4069.25	0.0534352	0.295402	24.1488	19.5099	3697.19	425.618	0.115119	4335	3805	4010	3437	3178	3890	3007	3542	3543	3139	3189	3760	4142	4208	4133	3794	3694.5
1233	unknown1567	8.77e-05	0.00321778	18	12	6488.24	0.044031	1	20	12	38384.2	5.2e-05	0.00321582	19	12.0333	30990.7	8461.48	0.273033	27058	28446	23997	27690	27311	34430	28263	30693	42160	37799	37123	36455	23868	24329	25393	24843	29991.1
1236	unknown157	0.000320124	0.00696552	18	0	1898.23	0.436135	1	28	17.9999	4410.75	0.00137895	0.0257364	23	18.8928	5751.53	3902.48	0.678512	6478	5350	19483	17909	1716	3259	3462	3723	4054	3864	3649	4067	3283	4686	5398	4276	5916.06
1260	unknown1591	0.0359573	0.164931	24	0	206.829	0.579738	1	28	17.9999	1158	0.101532	0.444522	26	21.3571	2323.64	1774.11	0.763506	1317	1531	9201	9665	624	1068	1268	1107	969	1107	998	1161	909	1160	1201	1362	2165.5
1270	unknown160	0.000171384	0.00472671	18	0	3803.17	0.29869	1	26.9725	17.9999	13047	0.000556952	0.0147036	22.4862	18.7462	13788.3	7053.25	0.511538	17133	12663	36125	33037	8288	10663	9014	8817	11264	7745	9583	11372	11487	14107	14174	12420	14243.2
1275	unknown1604	0.000987235	0.0140155	18	0	1443.38	0.444056	1	26.4865	18	9016.75	0.00382818	0.049187	22.2432	18.6798	8957.73	2036.29	0.227323	10190	9222	14260	13738	4034	8523	8238	8604	8682	7934	7249	9033	9027	8668	9045	9327	9110.88
1281	unknown161	4.22e-05	0.00240315	18	0	1401.84	0.121329	1	25.4179	17.9999	2764.75	6.75e-05	0.00384374	21.7089	18.5412	2514.71	1104.43	0.439187	3844	4124	4052	3731	1341	1940	1384	1466	2569	1537	2126	2812	2318	3521	2400	2820	2624.06
1282	unknown1610	0.00267199	0.0280139	24	0	1180.34	0.112069	1	24.4321	6.63e-05	10035.2	0.00272905	0.0399215	24.2161	3.29e-05	8930.61	1336.49	0.149653	10175	8568	10722	10676	7198	8885	7874	8542	8489	7763	7606	8512	9004	8981	9455	10292	8921.38
1325	unknown165	0.00267199	0.0280139	24	0	2921.59	0.0547898	1	24.0327	6.63e-05	11051.2	0.00143897	0.0266271	24.0163	3.31e-05	8765.22	3562.39	0.406424	12993	10268	11015	9929	7009	8121	5817	5819	8323	4681	5688	7593	9484	13606	9675	10192	8763.31
1333	unknown1657	0.0299489	0.138103	18	0	803.273	0.581452	1	25.8651	17.9999	4476.75	0.0879485	0.407291	21.9326	18.5979	4378.63	723.152	0.165155	4941	4639	5953	5853	2480	3941	3712	4813	4721	4044	3605	4479	4331	4144	4627	4805	4443
1337	unknown1660	0.0144977	0.086706	24	21	2432.27	0.22417	1	25.2722	17.9999	13794.7	0.0218693	0.166422	24.6361	19.5517	10150.1	3299.8	0.325102	11181	7966	10458	13018	4241	7623	7988	10164	6838	8311	8970	9074	10281	18841	11093	14964	10063.2
1341	unknown1664	0.0419656	0.170301	18	15	323.148	0.992485	1	20	12	2832.25	0.174033	0.628754	19	13.6167	2620.5	458.669	0.175031	2496	2613	3015	3537	1597	2537	2355	2493	2748	2520	3175	2886	2462	2384	2665	2374	2616.06
1369	unknown169	2.89e-06	0.0004463	18	0	8546.09	0.0723916	1	26.0177	18	15377	3.42e-06	0.000664351	22.0088	18.6177	14459.4	7158.52	0.495077	22157	22261	25576	26597	6887	10269	7946	9018	13052	10614	10727	14544	14420	16748	14308	16032	15072.2
1381	unknown170	8.77e-05	0.00321778	18	0	5395.58	0.324207	1	27.6489	18	12909.7	0.000326034	0.0107766	22.8245	18.8418	15153.4	8740.89	0.576826	18978	15445	40516	42482	6095	9939	9834	10287	11285	11410	9745	11757	10679	13550	14513	12897	15588.2
1388	unknown1706	0.0210199	0.109923	24	21	568.514	0.275174	1	20	17.9999	5696.75	0.0355876	0.226276	22	19.525	5275.48	721.728	0.136808	5640	5791	5496	7100	3685	4989	4883	3613	4983	5289	4889	6329	5855	5887	5366	5679	5342.12
1395	unknown1712	2.89e-06	0.0004463	18	0	2392.5	0.0631358	1	24.5682	17.9999	8582.99	3.01e-06	0.000664351	21.2841	18.439	7732.81	2142.8	0.277105	10345	10457	9045	11373	5506	6793	5731	5433	7556	6869	6608	7727	7856	9120	8465	8891	7985.94
1396	unknown1713	0.000572095	0.00994847	18	0	1450.81	0.153577	1	25.5652	17.9999	6116.5	0.000908458	0.0196867	21.7826	18.5596	5847.75	1206.1	0.20625	6980	7182	7057	8453	4855	6035	4331	4197	6029	5075	5036	5715	5643	6446	6425	5952	5963.19
1416	unknown1731	0.0210199	0.109923	18	3	638.341	0.390712	1	27.1385	17.9999	26111.7	0.0476508	0.27695	22.5692	9.36544	13750.7	7034.27	0.511556	15084	9206	17017	8786	10094	7480	8308	10501	12122	9328	8295	6813	29012	17659	45284	12492	14217.6
1425	unknown174	0.000320124	0.00696552	24	0	777.817	0.294555	1	27.4766	6.63e-05	7343.73	0.000968317	0.0203534	25.7383	3.11e-05	4159.63	2176.48	0.523237	4904	3448	11030	9993	2344	3240	2653	3128	2948	2441	2324	2855	3101	3845	3424	3269	4059.19
1445	unknown1758	0.00980952	0.0660579	18	15	8471.49	0.239038	1	20	12	49683.8	0.0165441	0.134908	19	13.6167	41743.3	10513.4	0.251858	51702	44093	37846	35728	34048	37058	31892	31750	52214	41656	50732	54133	40363	42762	35942	44345	41641.5
1446	unknown1759	0.0144977	0.086706	24	18	170.413	0.0982383	1	20.1831	17.9999	2726	0.0107588	0.100959	22.0915	18.1353	2543.49	193.036	0.0758943	2592	2731	2392	2661	2307	2261	2431	2096	2799	2433	2520	2804	2791	2678	2623	2812	2558.19
1449	unknown1761	0.00267199	0.0280139	18	15	51138.7	0.143838	1	20	12	241250	0.00340675	0.0452492	19	13.6167	204283	50558.3	0.247491	242985	230597	183732	165258	160141	168312	156146	158243	253435	206066	246696	258801	223944	202795	183538	220012	203794
1450	unknown1762	0.00164724	0.0199233	18	15	14654.8	0.152626	1	20	12	72720.2	0.00233522	0.0366359	19	13.6167	61392.9	15764.3	0.256778	71784	69690	54862	54540	47263	51762	46434	47992	77673	61641	75020	76547	65929	63097	53099	62510	61240.2
1454	unknown1766	0.0299489	0.138103	18	0	1325.29	0.83428	1	20	12	5568.25	0.11717	0.488204	19	15.2	4974.09	1786.66	0.359192	6650	5939	6408	6225	2611	4446	2488	4269	4561	4742	4397	8573	5698	4877	3051	7548	5155.19
1455	unknown1767	0.000987235	0.0140155	18	15	18622	0.112888	1	20	12	102293	0.00112583	0.0222595	19	13.6167	86337.8	21893.7	0.253582	97314	96545	78231	77667	64108	70293	70895	66448	100522	88580	109062	111007	91468	84267	75368	96237	86125.8
1456	unknown1768	0.00267199	0.0280139	18	15	6623.47	0.119684	1	20	12	37418	0.00289346	0.0407778	19	13.6167	31019.4	8285.12	0.267095	34345	33853	28516	27771	22001	27000	25032	24334	39671	31590	38636	39775	34381	30610	26098	31413	30939.1
1473	unknown1783	0.0419656	0.170301	24	15	20904.6	0.328252	1	21.4599	12	152593	0.0728007	0.363583	22.7299	13.4582	124519	33977.7	0.272871	132585	121157	79912	77024	154284	112669	105570	93466	144469	133168	165097	167639	132897	142552	104293	114841	123851
1506	unknown1812	0.0299489	0.138103	24	12	4731.96	0.311835	1	20	12	33870.2	0.052986	0.29414	22	12.1	22684	11575.3	0.510283	22170	17644	12531	13872	19041	20511	23280	15684	25118	25366	29606	55391	18101	20861	11145	21697	22001.1
1559	unknown1860	0.0299489	0.138103	18	15	980.404	0.992512	1	20	12	8832.25	0.13423	0.532443	19	13.6167	4437.21	4842.89	1.09143	8049	2169	2938	4104	2014	2940	1692	1787	26285	3340	2470	3234	2335	2057	1910	2921	4390.31
1619	unknown1914	0.00421867	0.0379768	18	3	399.692	0.242106	1	26.3284	6.63e-05	6240.99	0.0080551	0.0826507	22.1642	1.84704	6208.89	2962.44	0.477129	7404	5651	6851	5058	4939	4163	4751	4995	6011	4840	4502	3411	11807	7394	13362	5993	6320.75
1626	unknown1920	0.0144977	0.086706	24	21	7487.91	0.364878	1	26.9725	17.9999	44105.3	0.0330193	0.218295	25.4862	19.6543	25042.7	13307.4	0.53139	25465	16919	30256	14895	16557	13534	14764	16559	18906	17913	15390	10581	51294	29975	74571	20582	24260.1
1628	unknown1922	0.0299489	0.138103	24	21	665.034	0.394722	1	26.6465	17.9999	6044.98	0.0642835	0.336575	25.3233	19.632	3686.85	1711.76	0.464289	2863	2559	5193	2890	2066	2351	2721	2318	2359	3159	2571	2313	7677	4553	9506	2444	3596.44
1656	unknown1948	0.000572095	0.00994847	18	0	876.459	0.366883	1	28	17.9999	1726	0.00198745	0.0325971	23	18.8928	2300.01	1541.5	0.670213	2915	2344	6887	7552	693	1190	1433	1557	1730	1549	1330	1756	1255	1924	1855	1870	2365
1658	unknown195	0.0299489	0.138103	18	3	2160.74	0.253624	1	20.8511	8.13e-05	20022	0.0446644	0.266387	19.4255	1.61883	17425.6	3027.6	0.173745	23997	17904	19589	18598	19826	18437	14679	16832	17330	12767	12137	16493	17239	20500	19700	19993	17876.3
1669	unknown196	0.000572095	0.00994847	18	0	782.06	0.0845144	1	25.1282	17.9999	3054	0.000528808	0.0142314	21.5641	18.5055	2803.62	716.129	0.25543	3516	3133	4123	4042	2534	2511	1876	2287	2722	2041	2148	2918	2796	3308	3142	2970	2879.19
1675	unknown1965	7.77e-06	0.000909301	18	0	6092.08	0.0974414	1	25.7143	17.9999	10917.2	1.14e-05	0.00135385	21.8571	18.5785	10068	4963.6	0.493009	16126	15470	16117	18782	4128	6777	5944	6004	9477	7506	8178	10246	9614	12405	8898	12752	10526.5
1677	unknown1967	8.77e-05	0.00321778	18	0	4433.56	0.294962	1	27.8233	17.9999	9260.99	0.00029907	0.010117	22.9117	18.867	10856	6227.09	0.573609	14624	11589	27016	30146	3804	6857	7395	7325	8565	8009	7290	8612	7335	10340	9057	10312	11142.2
1678	unknown1968	0.0144977	0.086706	18	0	980.757	0.377688	1	27.8233	17.9999	3436	0.0339896	0.220261	22.9117	18.867	3997.1	1744.86	0.436532	4644	3525	9737	9925	2098	3492	3154	2913	3098	2778	2928	3201	3508	3850	2904	3482	4077.31
1687	unknown1976	0.00164724	0.0199233	18	0	903.859	0.143161	1	25.1282	17.9999	3357.5	0.0022055	0.0356336	21.5641	18.5055	3084.24	821.044	0.266206	4253	3444	4008	4748	2718	2619	2315	2189	2993	2334	2423	3260	2887	4157	2865	3521	3170.88
1695	unknown1983	0.00980952	0.0660579	18	0	2321.43	0.525333	1	25.2722	17.9999	10646.5	0.0323013	0.215508	21.6361	18.5231	10182.4	2292.6	0.225152	11524	10253	14348	16512	7237	8187	8296	8212	11455	8968	8161	10932	10040	12868	8767	10911	10416.9
1709	unknown1996	0.0065055	0.0504817	18	0	688.722	0.454648	1	25.2722	17.9999	3995.75	0.0201815	0.156562	21.6361	18.5231	3762.96	886.467	0.235577	4372	3386	5610	6214	2830	3423	2987	2788	3624	3342	3152	3947	3842	4069	3236	4836	3853.62
1710	unknown1997	0.00267199	0.0280139	18	0	1185.99	0.37507	1	27.8233	17.9999	3890.5	0.00792285	0.0814868	22.9117	18.867	4458.91	2018.25	0.452634	5656	4236	10246	10810	2257	3231	3275	3168	3188	3800	3240	4158	3194	4461	3557	4350	4551.69
1743	unknown2025	0.0419656	0.170301	24	3	1055	0.33273	1	28	6.63e-05	4646.24	0.0736047	0.364469	26	1.62503	2698.5	775.841	0.287508	4229	2717	7378	4261	1563	3007	2254	2415	2609	915	850	2590	931	3369	2706	1147	2683.81
1787	unknown2065	0.0210199	0.109923	18	0	1627.76	0.546675	1	28	12	4243.5	0.0628122	0.332084	23	4.92858	4385.39	2030.44	0.463001	6109	7275	5371	6457	2434	2804	4442	3270	4749	3225	3894	5106	3885	3074	3625	5116	4427.25
1788	unknown2066	0.0299489	0.138103	18	0	329.865	0.76001	1	20	12	3495.75	0.108861	0.467164	19	15.2	3446.89	339.649	0.0985379	3812	3762	3713	3800	2931	3562	3254	2962	3328	3696	3117	3842	3653	3429	3427	3413	3481.31
1792	unknown207	0.00980952	0.0660579	24	0	1398.13	0.15617	1	24.2975	6.63e-05	10991.5	0.0114608	0.10484	24.1488	3.3e-05	9413.22	1819.89	0.193333	12373	10638	10937	10018	10674	9795	7882	7377	9648	6919	7020	8056	9609	10155	9993	9378	9404.5
1803	unknown208	0.000320124	0.00696552	18	0	1149.76	0.137897	1	26.3284	17.9999	3534.25	0.000486823	0.0136243	22.1642	18.6586	3427.19	1521.48	0.443944	4711	3705	7237	6753	2302	2750	2057	2422	2770	2205	2406	3296	3737	3421	3243	3736	3546.94
1814	unknown209	0.000987235	0.0140155	18	0	1665.59	0.273404	1	28	17.9999	5191	0.00248791	0.0382008	23	18.8928	6153.77	2951.02	0.479546	8631	5818	16520	13494	3416	4336	4095	5183	4791	4747	3856	4800	4792	5142	5738	5092	6278.19
1836	unknown2109	0.0299489	0.138103	24	0	780.646	0.273523	1	24.5682	6.63e-05	3540.99	0.0475499	0.27695	24.2841	3.28e-05	2723.34	966.569	0.354921	3520	3756	3770	3118	2582	1609	2037	2460	2397	2308	2033	1654	2235	2288	2781	4886	2714.62
1840	unknown2112	0.00421867	0.0379768	18	0	2416.54	0.236347	1	24.8451	17.9999	6211.49	0.00788751	0.0813165	21.4225	18.4714	5256.55	2131.7	0.405531	7109	7639	6544	9799	2685	3216	5607	3355	4410	3025	3793	5893	9382	6221	3982	5261	5495.06
1841	unknown2113	0.0210199	0.109923	18	0	4325.02	0.350537	1	26.9725	17.9999	9954.5	0.0435506	0.262273	22.4862	18.7462	10293.5	3818.58	0.370972	12767	16511	14214	20585	6082	6731	9451	7170	8936	6570	8915	10886	12917	4375	9057	13469	10539.8
1843	unknown2115	0.0121536	0.0813372	18	0	1383.28	0.172259	1	25.5652	17.9999	3423.25	0.0150086	0.127177	21.7826	18.5596	3121.18	1138.87	0.364884	4256	4720	4006	5462	2033	1966	3131	2243	2919	1773	2350	3131	5065	2886	2514	3228	3230.19
1881	unknown215	0.0065055	0.0504817	24	0	1178.92	0.166827	1	24.5682	6.63e-05	5986.74	0.00849339	0.0849339	24.2841	3.28e-05	4846.35	1328.17	0.274056	5168	5598	6354	6827	3156	3941	3922	5126	3625	3563	3896	4972	4242	4731	5592	6637	4834.38
1896	unknown2163	0.0419656	0.170301	18	0	3132.13	0.738528	1	20	12	45904.8	0.138662	0.543353	19	15.2	45116.6	3731.49	0.0827077	48261	49810	45293	51167	38530	45128	44723	40270	46612	45435	44920	46652	46070	46051	43331	45664	45494.8
1904	unknown2170	0.0144977	0.086706	18	0	598.566	0.470063	1	27.1385	17.9999	4258.25	0.0408118	0.251373	22.5692	18.7693	4323.09	584.934	0.135305	5137	4713	4542	6455	3463	4601	3998	3515	4384	3945	3788	4165	4513	4511	3987	4022	4358.69
1907	unknown2173	0.0299489	0.138103	24	18	983.939	0.996802	1	20	17.9999	3136.5	0.134682	0.532443	22	18.15	2484.09	1702.52	0.685368	993	1775	963	12902	671	895	1192	869	1725	4824	1502	1081	4086	3810	2727	1923	2621.12
1912	unknown2178	0.000572095	0.00994847	18	0	5778.83	0.129495	1	26.1721	17.9999	7338.99	0.000778638	0.0182243	22.0861	18.6379	6877.97	4839.11	0.703566	12638	11536	12641	17673	2418	3639	3500	3227	5427	3303	4912	6140	5742	4065	6875	12674	7275.62
1913	unknown2179	0.00164724	0.0199233	18	0	1365.6	0.146228	1	26.9725	17.9999	1438.25	0.00224764	0.0359124	22.4862	18.7462	1512.26	1029.95	0.681065	2935	2695	2740	3762	454	848	766	716	1410	685	1147	1348	1132	763	1484	2374	1578.69
1915	unknown2180	0.000320124	0.00696552	18	0	15246.1	0.220803	1	26.1721	17.9999	33366.5	0.000746235	0.0176568	22.0861	18.6379	32347.2	13903.4	0.42982	43837	45177	51462	65942	14759	22244	22867	22333	28518	24575	26767	33888	28139	25343	32169	47815	33489.7
1916	unknown2181	0.000171384	0.00472671	18	0	11771.9	0.200208	1	26.6465	17.9999	22993.2	0.000387046	0.0119871	22.3233	18.7014	23081.2	10345.1	0.448207	33243	32144	37841	48120	10636	15842	15639	15317	20356	17551	19458	23042	20035	16986	22854	32098	23822.6
1917	unknown2182	1.91e-05	0.00150306	18	0	1999.34	0.188533	1	25.4179	18	5528.25	4.87e-05	0.00314849	21.7089	18.5412	5078.18	1967.63	0.387468	6318	6680	7334	10201	2823	3852	3653	3293	4121	4064	4300	5616	4855	5856	4693	6709	5273
1918	unknown2183	8.77e-05	0.00321778	18	0	726.552	0.177392	1	25.8651	17.9999	2079.5	0.000187772	0.00813052	21.9326	18.5979	1970.15	677.344	0.343804	2436	2644	2674	3772	1243	1553	1617	1318	1616	1489	1696	2111	1727	2188	1877	2526	2030.44
1933	unknown2197	0.0299489	0.138103	18	0	508.587	0.815639	1	20	18	11855.7	0.115104	0.482944	19	18.05	11266.1	638.359	0.0566619	12311	11874	9854	13509	9526	11303	11141	10495	11394	10532	11784	11331	11513	12577	11556	11777	11404.8
1971	unknown2230	0.0299489	0.138103	18	15	1773.42	0.672851	1	20	12	12673.5	0.0988313	0.43789	19	13.6167	10914.6	2205.58	0.202076	12095	12405	8247	11285	8572	11623	9742	7743	12610	12895	13142	12047	11810	12154	9161	8761	10893.2
1974	unknown2233	0.0419656	0.170301	24	15	481.009	0.351242	1	20.2759	12	4373	0.0769017	0.374983	22.1379	13.4691	3780.84	716.674	0.189554	4146	4032	2403	3129	3252	3767	3223	3484	4717	4324	4098	4353	4137	4224	3487	3421	3762.31
1975	unknown2234	0.0419656	0.170301	18	15	1237.26	0.349131	1	20	12	9100	0.0765278	0.374001	19	13.6167	7618.35	1649.93	0.216572	7928	8384	5727	7256	5509	8027	7108	5316	9060	8817	9062	9461	8423	8916	6338	6306	7602.38
2013	unknown2269	0.00980952	0.0660579	18	15	16361.4	0.115747	1	20	12	83719.5	0.00883447	0.087536	19	13.6167	71377.5	17945.2	0.251412	80118	82760	66702	61896	53456	55960	58123	53020	79726	75531	88369	91252	75817	66484	65183	84862	71203.7
2016	unknown2271	0.0419656	0.170301	18	15	648.77	0.0379621	1	20	12	4147.5	0.011856	0.107551	19	13.6167	3825.49	644.642	0.168512	4146	3873	4041	3834	2728	3109	3104	3253	4039	4034	4195	4322	4170	3840	3772	4648	3819.25
2026	unknown2280	0.0419656	0.170301	18	15	24056.1	0.16563	1	20	12	117714	0.0414884	0.253021	19	13.6167	100800	21880.6	0.217069	113057	117386	86887	75079	79910	81290	79896	80490	121133	100677	121584	127462	114291	94435	95278	120560	100588
2028	unknown2282	0.0144977	0.086706	18	15	1781.56	0.107819	1	20	12	9129.25	0.0116626	0.10609	19	13.6167	8056.45	1724.31	0.214029	9597	8929	7276	7548	6327	6748	6115	6305	9231	8431	9304	9551	9261	7932	7360	8721	8039.75
2040	unknown2293	0.0299489	0.138103	18	15	403.581	0.183424	1	20	12	3391.5	0.034082	0.220261	19	13.6167	2962.18	554.362	0.187147	3584	2679	2733	2718	2535	2805	2233	2378	3547	3065	3364	3590	3200	3020	2614	3244	2956.81
2082	unknown2330	0.0144977	0.086706	18	0	1134.02	0.586015	1	20	12	8664	0.0490058	0.281862	19	15.2	8220.98	1528.16	0.185886	9041	9046	10437	9656	6408	7824	6297	7398	8830	7518	8874	9434	8234	8053	7560	9404	8375.88
2089	unknown2337	0.00267199	0.0280139	24	0	2727.31	0.0887438	1	24.9858	17.9999	6037.98	0.00221637	0.0356762	24.4929	21.0689	5277.76	2974.46	0.563583	8107	8434	5686	11795	2225	2886	3446	3890	2970	3120	2800	3854	4316	4445	6700	8691	5210.31
2093	unknown2340	0.00164724	0.0199233	18	0	505.758	0.19323	1	20	17.9999	2348.75	0.00288138	0.0407778	19	18.05	2128.5	444.433	0.208801	2477	2650	2474	3292	1611	1685	1603	1289	2154	2112	2205	2654	2155	2329	2173	2738	2225.06
2094	unknown2341	0.0299489	0.138103	18	0	675.641	0.462735	1	20	12	3438	0.0731566	0.364015	19	15.2	3047.57	1039.52	0.341096	3271	4086	3631	4405	2091	2531	2094	1994	3355	3477	3032	3888	2725	3204	2542	4121	3152.94
2190	unknown2428	0.00267199	0.0280139	18	0	1691.05	0.246647	1	26.1721	17.9999	5369.75	0.00548632	0.0637706	22.0861	18.6379	5228.11	1646.83	0.314995	7109	5324	8290	9421	2251	4717	4923	3999	4718	4453	4079	5052	4649	5894	5476	5460	5363.44
2195	unknown2432	0.0299489	0.138103	18	0	4086.19	0.39975	1	22.6735	17.9999	30550.7	0.0649507	0.338025	20.3368	18.2408	27297.7	4194.97	0.153675	32331	27263	29078	36898	26323	23459	23047	21310	22156	26835	32486	24165	27853	31526	26293	36531	27972.1
2221	unknown2456	0.0299489	0.138103	18	0	352.846	0.963266	1	28	18	1531.25	0.131138	0.525278	23	18.8928	1805.2	773.501	0.428485	1808	1867	1596	7114	836	1514	1497	1043	1547	1074	1573	1811	1830	1389	1286	1620	1837.81
2224	unknown2459	0.0065055	0.0504817	24	15	711.703	0.16126	1	22.3291	12	5754.75	0.00824559	0.0834192	23.1646	13.4634	5006.48	847.03	0.169187	4223	5129	3905	4257	5544	4537	4660	3868	5255	5640	6010	6114	5610	5605	4641	4920	4994.88
2248	unknown2480	0.0359573	0.164931	24	15	1522.05	0.391599	1	24.0327	12	14050.8	0.0741066	0.365426	24.0163	13.501	12186	2194.83	0.180111	12711	11671	8468	8427	13876	12153	11671	9557	13222	12242	15407	15332	12202	14327	10612	13108	12186.6
2303	unknown253	0.0299489	0.138103	18	3	586.368	0.585118	1	26.4865	5.99e-05	3058.75	0.0883929	0.408046	22.2432	1.85363	3043.3	1871.62	0.614997	2644	2139	3348	4104	1423	2305	2381	4368	1298	1639	1818	3026	2782	4142	5575	6763	3109.69
2329	unknown2553	0.00980952	0.0660579	24	0	726.022	0.221776	1	26.8085	6.63e-05	5880.24	0.0155125	0.12942	25.4043	3.14e-05	4366.15	1220.36	0.279504	5329	4666	5358	8168	3537	4532	4133	3466	2990	3156	3163	4302	3450	4024	3695	5129	4318.62
2330	unknown2554	0.0419656	0.170301	24	0	974.923	0.249608	1	26.8085	6.63e-05	6150.99	0.0582278	0.312812	25.4043	3.14e-05	4421.21	1335.77	0.302128	5586	5314	5210	8494	3537	4088	3905	3253	2818	3337	3284	4463	3426	3726	3650	5816	4369.19
2332	unknown2556	0.0144977	0.086706	24	0	786.303	0.138654	1	27.1385	6.63e-05	4293.99	0.0144923	0.123859	25.5692	3.12e-05	3046.1	888.451	0.291668	3980	3888	4038	5270	2293	2828	2605	2200	2028	2000	2604	3152	2329	2625	2551	3741	3008.25
2377	unknown2597	0.0419656	0.170301	24	21	578.06	0.362111	1	23.3952	17.9999	8500.75	0.0788182	0.380048	23.6976	19.484	8003.84	603.081	0.075349	8742	8058	7700	8770	7427	8476	6727	7106	7606	7426	7708	8439	8137	8892	8207	8767	8011.75
2378	unknown2598	0.0419656	0.170301	18	0	12648.5	0.418534	1	23.9024	17.9999	218295	0.0885562	0.408046	20.9512	18.3644	206648	13891.5	0.0672233	232481	209499	202210	231849	194974	216200	191958	183413	197454	195750	189192	217801	205208	230308	208002	229662	208498
2407	unknown2623	0.000987235	0.0140155	24	15	1105.56	0.0842754	1	26.8085	12	6196.75	0.000864799	0.019302	25.4043	13.6245	4750.86	1771.2	0.372817	4171	3995	684	1797	3752	6124	5199	4945	5910	5756	6606	6515	5646	5552	4874	5238	4797.75
2440	unknown2653	0.0299489	0.138103	18	0	1991.21	0.583127	1	20	17.9999	11815.2	0.0881516	0.407796	19	18.05	10869.7	1870.57	0.172091	14879	13823	9720	15148	5342	11059	10142	8177	10151	10548	11450	12718	11673	13613	10210	11765	11276.1
2441	unknown2654	0.00344533	0.0358613	18	0	1117.76	0.475383	1	20	17.9999	4390	0.0121436	0.109546	19	18.05	3953.62	1053.09	0.266362	6892	6119	3391	5565	1668	3202	3593	3155	3969	3690	3593	4522	3923	4615	4110	4912	4182.44
2442	unknown2655	0.0210199	0.109923	18	0	827.668	0.51338	1	20	17.9999	5223.25	0.0596647	0.31981	19	18.05	4710.82	843.046	0.178959	6525	5999	3963	6592	2393	4833	4276	3506	4407	4534	4966	5417	5262	5819	4618	5194	4894
2443	unknown2656	0.0144977	0.086706	18	0	37391.5	0.446763	1	20	17.9999	214176	0.039118	0.244065	19	18.05	193851	36228.5	0.186888	276077	248128	170180	269929	99750	192567	169485	151766	185139	187037	198794	222009	210368	242647	189729	213959	201723
2445	unknown2658	0.0144977	0.086706	18	3	497.45	0.16025	1	24.5682	6.63e-05	5030.99	0.0164134	0.134549	21.2841	1.77371	4500.68	1264.36	0.280926	5066	3540	5351	6167	2842	3931	4448	4273	4289	3237	3633	3735	5467	6195	4846	6350	4585.62
2446	unknown2659	0.00421867	0.0379768	18	0	1211.27	0.245534	1	20	17.9999	8092.5	0.0081546	0.083081	19	18.05	7245.82	1232.82	0.170143	10225	8199	7057	9250	3821	6162	6465	6402	7296	8022	7347	7603	8093	8862	7042	8373	7513.69
2447	unknown266	0.0419656	0.170301	24	12	820.244	0.50286	1	22.6735	12	8198	0.102525	0.446612	23.3368	12.0097	6630.76	1867.14	0.281588	5374	5967	4633	5287	6397	6167	9032	6175	9968	6412	11010	5402	6653	5525	6231	5224	6591.06
2449	unknown2661	0.0419656	0.170301	18	0	832.972	0.598123	1	20	17.9999	5513.25	0.117593	0.489123	19	18.05	5062.17	789.975	0.156055	6646	6013	4316	7275	2548	4989	4731	3843	4895	5249	5223	5960	5422	6429	4853	5349	5233.81
2452	unknown2664	0.0210199	0.109923	18	0	599.45	0.6838	1	28	12	2452	0.0753508	0.3695	23	4.92857	2748.01	1624.4	0.59112	2969	2533	5194	7014	1152	2093	2380	1937	2319	2177	2601	2711	2108	2435	2328	2553	2781.5
2456	unknown2668	0.00421867	0.0379768	18	0	177589	0.322976	1	20	17.9999	1.12898e+06	0.0103531	0.0978794	19	18.05	1.02679e+06	176295	0.171695	1400101	1315501	969030	1337320	582125	957205	982509	853394	1067688	974492	989919	1096330	1078224	1198805	1034033	1204851	1.0651e+06
2457	unknown2669	0.0065055	0.0504817	18	0	5592.15	0.384992	1	20	17.9999	34303.2	0.017506	0.140894	19	18.05	31550.9	5204.52	0.164957	43469	39805	29602	41329	18096	29776	30500	26146	32184	30239	30602	33946	33567	36572	31379	35695	32681.7
2459	unknown2670	0.00421867	0.0379768	18	0	787.54	0.303397	1	20	17.9999	5249	0.0098055	0.0941415	19	18.05	4761.12	729.489	0.153218	6023	5903	4551	6058	2830	4456	4735	3668	4801	4793	4371	5529	5322	5609	4889	5176	4919.62
2460	unknown2671	0.00421867	0.0379768	18	0	1074.45	0.318215	1	20	17.9999	6485.75	0.0102204	0.0970487	19	18.05	5851.39	1043.52	0.178338	7817	7427	5378	8107	3480	5289	5582	4867	6050	5296	5551	6463	6103	6997	6002	6841	6078.12
2461	unknown2672	0.00267199	0.0280139	18	0	4527.6	0.322702	1	20	17.9999	28097.7	0.00694631	0.0742655	19	18.05	25331.4	4595.85	0.181429	34791	31970	23814	34330	14215	23579	24535	20757	25558	23274	23669	28397	26146	28957	26982	30306	26330
2463	unknown2674	0.00980952	0.0660579	18	0	888.656	0.3637	1	20	17.9999	5985	0.0236748	0.174428	19	18.05	5391.29	900.427	0.167015	7554	6517	5028	6861	2981	5269	5072	4476	5582	4984	5194	5933	5717	6501	5469	6253	5586.94
2464	unknown2675	0.0419656	0.170301	18	0	1291	0.653316	1	24.9858	17.9999	8138	0.126024	0.512861	21.4929	18.4883	7843.23	1215.49	0.154973	10244	10710	7806	8853	4495	6910	7579	7732	8636	6923	6774	8392	8324	7334	8557	8337	7975.38
2465	unknown2676	0.00421867	0.0379768	18	0	773.398	0.255474	1	20	17.9999	5461.75	0.00844196	0.0849339	19	18.05	4826.02	790.364	0.163771	6141	5769	4563	6262	2956	4427	4794	3887	5032	4451	4243	5592	5141	5707	5133	5866	4997.75
2466	unknown2677	0.0144977	0.086706	18	0	904.743	0.429844	1	24.2975	17.9999	4771	0.0378772	0.237503	21.1488	18.408	4449.21	878.206	0.197385	6478	5866	4272	5486	2678	3996	4040	3773	5016	4008	3653	4583	4296	4664	4534	5590	4558.31
2469	unknown268	0.0210199	0.109923	24	12	2390.02	0.420434	1	23.3952	12	20789	0.0506277	0.285047	23.6976	12.0019	16880.7	4921.88	0.291569	13907	14962	11787	13213	16216	16972	23455	16147	24875	16425	27755	14101	17027	14015	15540	12921	16832.4
2470	unknown2680	0.000987235	0.0140155	18	0	1828.05	0.434991	1	20	17.9999	12984.7	0.00375889	0.048585	19	18.05	12319.7	1698.76	0.13789	15902	16205	12862	14371	8292	10654	11676	11807	14155	12012	10428	12718	12662	12815	12752	13710	12688.8
2472	unknown2682	0.00815751	0.0629626	18	0	545.886	0.625316	1	20	12	4290.25	0.0320258	0.214294	19	15.2	4117.87	709.166	0.172217	5174	4411	4605	4876	3267	3526	3471	3943	4326	4411	4273	4151	3469	4705	3952	4476	4189.75
2519	unknown2724	0.000171384	0.00472671	18	0	26187	0.25709	1	20	17.9999	147470	0.000485992	0.0136243	19	18.05	135367	23920.9	0.176712	180564	167929	138560	186154	86101	122679	131435	108195	128759	132033	133752	142990	138145	161456	132545	157733	140564
2555	unknown2757	0.0210199	0.109923	18	0	251.023	0.311285	1	24.0327	17.9999	3301.5	0.039451	0.245435	21.0163	18.3786	3120.16	296.35	0.0949791	3507	3175	3210	3853	2679	3298	2668	2900	2874	2995	2998	3177	3483	3431	3292	3000	3158.75
2557	unknown2759	0.00980952	0.0660579	18	0	804.511	0.337061	1	20	17.9999	6712.25	0.0221923	0.167409	19	18.05	6021.5	844.808	0.140298	6899	7382	7790	5598	4214	5207	5584	5330	6529	6152	5821	5926	5375	8087	6752	6635	6205.06
2560	unknown2761	0.0144977	0.086706	18	0	409.768	0.273267	1	20.0911	17.9999	5377.25	0.0258744	0.184574	19.0456	18.0544	4811.1	514.875	0.107018	5360	5430	5562	4486	3727	4535	4136	4383	4998	4771	4790	5066	4542	6504	5120	5343	4922.06
2563	unknown2764	0.000320124	0.00696552	18	0	481.009	0.206833	1	24.0327	17.9999	4630.5	0.00070335	0.0169281	21.0163	18.3786	4380.43	505.467	0.115392	4677	4732	4775	5654	3665	4472	3649	3952	4165	4300	4084	4493	4665	4856	4643	4358	4446.25
2565	unknown2766	0.000320124	0.00696552	18	0	785.949	0.162627	1	23.3952	17.9999	5592.5	0.000565543	0.0147518	20.6976	18.311	5148.34	784.764	0.15243	5864	5689	5668	6878	3853	5235	4097	4556	4997	4797	4579	5606	5601	5785	5562	5422	5261.81
2595	unknown2793	0.0299489	0.138103	18	0	377.241	0.75521	1	28	17.9999	1636.5	0.108317	0.465289	23	18.8928	2028.89	980.935	0.483483	1532	2087	4155	7068	830	1409	1622	1351	1763	1512	1704	1545	1672	1783	1810	1281	2070.25
2600	unknown2798	0.000572095	0.00994847	18	0	517.072	0.23753	1	20	17.9999	3068.75	0.00134581	0.0252266	19	18.05	2759.6	519.904	0.188398	3621	3713	2690	3703	1674	2546	2537	2265	2652	2668	2518	3099	2834	3429	2873	3139	2872.56
2604	unknown2800	0.0065055	0.0504817	18	0	11992.2	0.222657	1	20	17.9999	66965.4	0.0109177	0.10163	19	18.05	59553.3	11138.5	0.187033	78790	77992	56348	80173	37160	57268	56572	47429	58307	54708	54654	64312	61950	72653	63814	69445	61973.4
2605	unknown2801	0.0065055	0.0504817	18	0	857.367	0.307554	1	20	17.9999	5318.5	0.0144341	0.123762	19	18.05	4803.55	802.297	0.167021	6237	6272	4490	6218	2962	4790	4521	3816	4802	4319	4639	5306	5014	5815	5129	5316	4977.88
2626	unknown2820	0.00164724	0.0199233	18	0	703.394	0.177007	1	24.4321	17.9999	3913.5	0.00266505	0.0394039	21.2161	18.4233	3475.04	858.797	0.247133	4113	3904	4131	5669	1738	3167	3485	2898	3298	2874	2973	3362	3574	4215	3897	3968	3579.12
2672	unknown2862	8.77e-05	0.00321778	18	0	717.36	0.244814	1	26.3284	17.9999	2891	0.000252224	0.00925533	22.1642	18.6586	2849.11	807.721	0.283499	3584	3125	4238	5017	1346	2662	2337	2515	2624	2339	2461	2791	2850	2972	2700	3042	2912.69
2709	unknown2896	0.00980952	0.0660579	18	0	525.38	0.197422	1	20	17.9999	3608.25	0.0140343	0.120812	19	18.05	3255.8	480.447	0.147567	3864	3851	3530	3981	2151	3338	2980	2500	3184	3106	2924	3921	3535	3567	3594	3737	3360.19
2713	unknown29	0.0419656	0.170301	18	0	6543.39	0.337437	1	27.3065	17.9999	13937.5	0.0744469	0.365482	22.6533	18.7929	14973	5978.43	0.399281	14661	23828	24055	35014	6837	11772	14902	9716	8021	12273	13747	14462	14394	18383	11790	11183	15314.9
2716	unknown2901	0.0144977	0.086706	18	0	12266.5	0.325193	1	20	17.9999	123811	0.0299709	0.205014	19	18.05	115359	12726.6	0.110322	126555	125806	120863	148299	95187	119687	102123	78746	120024	111156	112646	133646	123457	125610	118173	128004	118124
2718	unknown2903	0.0419656	0.170301	18	15	724.431	0.509096	1	20	12	8117.5	0.103533	0.449647	19	13.6167	7325.25	1084.59	0.148061	6853	7472	6888	8461	6769	7475	6438	5172	8065	7693	7816	8896	7824	7047	6665	7502	7314.75
2742	unknown2925	0.0419656	0.170301	18	9	3816.43	0.495888	1	25.5652	6.00001	37933.8	0.101394	0.444368	21.7826	8.00178	35990.7	3052.76	0.0848208	29884	28098	32556	36430	39250	42255	37175	33055	41739	37412	33443	38666	37076	35700	35700	32578	35688.6
2746	unknown2929	0.0419656	0.170301	24	18	440.528	0.451569	1	23.0287	17.9999	4220	0.0941061	0.425788	23.5144	18.0076	3844.15	196.544	0.0511281	4166	4207	2197	3715	3271	3556	3346	3523	4359	4146	3926	4267	4328	4473	4092	3987	3847.44
2755	unknown2937	0.0210199	0.109923	24	15	977.222	0.393963	1	28	12	9648.25	0.0479786	0.278482	26	13.6964	8512.96	1116.81	0.131189	8962	9095	2961	4876	8228	9476	8500	7617	9483	8617	10192	10301	10095	10065	9226	9194	8555.5
2759	unknown2940	0.00980952	0.0660579	18	0	503.814	0.82609	1	26.3284	17.9999	4236.5	0.0471258	0.275378	22.1642	18.6586	4226.5	810.013	0.191651	4469	4402	5182	7340	2095	4161	3777	3687	3962	3818	4295	4510	3935	4405	4140	4466	4290.25
2767	unknown2948	0.0144977	0.086706	24	18	824.663	0.214686	1	28	17.9999	5644.25	0.0210786	0.161656	26	18.1071	4532.41	449.646	0.0992069	4202	5200	1074	1550	4300	4366	4238	4431	4836	5460	5278	5389	5367	6139	5642	5429	4556.31
2777	unknown2957	0.0299489	0.138103	24	12	722.84	0.283249	1	27.1385	12	5952	0.0489443	0.281862	25.5692	12.0454	4926.46	1276.49	0.259108	5178	4506	1177	1627	4530	6434	6034	5202	6171	5418	5751	6468	6238	5043	4944	5169	4993.12
2782	unknown2961	0.0065055	0.0504817	18	0	1097.43	0.785381	1	26.1721	17.9999	7476.75	0.0320695	0.214294	22.0861	18.6379	7445.5	1284.58	0.172531	7966	8305	8691	11928	3947	7711	6582	6456	7325	6493	7285	8221	7516	7619	7048	7724	7551.06
2797	unknown2975	0.000171384	0.00472671	18	0	977.929	0.215684	1	25.8651	17.9999	3212.5	0.000414212	0.0125422	21.9326	18.5979	3010.66	1160.27	0.385388	3923	3207	5233	5923	1058	2525	2674	2263	2979	2145	2359	2684	3112	3029	2952	3757	3113.94
2825	unknown30	0.0299489	0.138103	18	0	1600.36	0.322989	1	27.3065	17.9999	3259	0.0545412	0.29781	22.6533	18.7929	3498.81	1439.22	0.411344	3441	5708	5648	8236	1558	2781	3418	2238	1798	2806	3347	3283	3417	4298	2672	2649	3581.12
2829	unknown3002	0.0210199	0.109923	18	0	1141.27	0.842003	1	27.1385	17.9999	5886.75	0.0891003	0.409994	22.5692	18.7693	6047.69	1239.42	0.204941	6874	6621	7535	10440	2185	5608	6649	5095	5722	5133	5455	7106	6006	6082	5652	5807	6123.12
2841	unknown3013	2.89e-06	0.0004463	18	0	4029.8	0.389865	1	27.1385	17.9999	9750.5	1.65e-05	0.00179013	22.5692	18.7693	10342.8	4904.72	0.474216	13472	11609	18711	26847	3884	7024	7746	6180	9466	8409	8202	9709	9816	9628	9618	9940	10641.3
2917	unknown3082	0.0210199	0.109923	18	0	357.973	0.614813	1	20	17.9999	3814.5	0.0691231	0.351707	19	18.05	3532.85	384.974	0.10897	4272	3855	2913	4796	2293	3382	3482	2889	3556	3672	3446	4050	3793	3975	3689	3801	3616.5
2920	unknown3085	0.0419656	0.170301	18	0	2596.5	0.626421	1	25.7143	18	19372.2	0.121941	0.501429	21.8571	18.5786	18748.2	3456.22	0.184349	20397	20828	23470	28589	8970	17046	20198	17119	18432	18190	16762	17590	23539	19081	16530	18339	19067.5
3012	unknown3168	0.00164724	0.0199233	18	0	748.119	0.332284	1	26.0177	17.9999	4308.25	0.00465819	0.0563407	22.0088	18.6177	4234.6	713.576	0.168511	5050	4644	5333	5798	2643	3667	3861	4278	3989	3892	4134	4209	4871	4312	3894	4156	4295.69
3015	unknown3170	0.0419656	0.170301	18	0	429.567	0.685937	1	24.4321	17.9999	3468.5	0.130914	0.525278	21.2161	18.4233	3272.67	528.237	0.161409	4006	3586	3319	4752	1620	2962	3451	3104	3040	3127	2830	3716	3237	3577	3421	3639	3336.69
3063	unknown3213	0.0299489	0.138103	18	0	1082.93	0.805268	1	28	12	5358.75	0.113949	0.479959	23	4.92857	5327.9	1966.22	0.369043	6088	5547	7907	8298	2922	4789	4155	4665	6398	4534	5115	5388	4978	4498	5065	5548	5368.44
3090	unknown3238	0.0419656	0.170301	18	0	389.969	0.659496	1	28	12	1287.5	0.126956	0.515199	23	4.92857	1808.44	1579.06	0.873161	1642	1761	4077	7439	542	1211	1442	1140	1208	1170	1460	1312	1351	1191	1186	1324	1841
3112	unknown3258	0.0419656	0.170301	24	0	484.015	0.428803	1	27.4766	17.9999	3695.5	0.0902927	0.413191	25.7383	21.2997	3950.72	818.736	0.207237	4572	4459	5155	6324	1715	3548	3888	3538	3527	3345	3342	3995	3440	4046	3772	3524	3886.88
3117	unknown3262	0.0419656	0.170301	24	21	652.483	0.307025	1	24.1644	17.9999	4454.24	0.0689542	0.351675	24.0822	19.5053	3848.23	725.562	0.188544	5280	3706	3433	4376	2328	3904	3622	3212	4084	3007	3120	3642	4444	4065	4533	4775	3845.69
3160	unknown3300	0.0210199	0.109923	24	15	1203.67	0.178659	1	22.1053	12	8159	0.0247276	0.179111	23.0526	13.4611	7105.55	1087.79	0.153091	7791	7360	4945	5073	6496	6518	6307	5441	8637	7224	8210	8565	8367	7366	7089	8033	7088.88
3164	unknown3304	0.00980952	0.0660579	18	0	875.221	0.454609	1	20	18	5866.25	0.0285975	0.198117	19	18.05	5232.15	945.114	0.180636	6635	6738	5084	7101	2359	5054	5505	4459	5198	4417	5065	5920	5267	6257	5618	6323	5437.5
3194	unknown3331	0.0419656	0.170301	18	0	463.862	0.753105	1	25.8651	17.9999	3909	0.140781	0.548678	21.9326	18.5979	3811.17	644.092	0.169001	4112	4044	4564	5955	1806	3817	3940	3455	3457	3844	3494	3772	3489	4508	3715	3924	3868.5
3196	unknown3333	1.91e-05	0.00150306	18	0	1459.11	0.547069	1	27.6489	18	5503	0.000130239	0.0060638	22.8245	18.8418	6417.68	3817.1	0.594779	6278	5365	17725	20810	2323	4212	4613	3636	5072	4029	4694	4952	5958	5360	5091	5603	6607.56
3244	unknown3377	0.0210199	0.109923	24	15	615.536	0.180997	1	22.1053	12	3550.5	0.0250017	0.180429	23.0526	13.4611	2883.34	735.569	0.25511	3165	2783	1445	1961	1884	2598	2752	2713	3379	3221	3825	3777	2712	3656	3253	2829	2872.06
3253	unknown3385	0.0144977	0.086706	18	15	715.239	0.914772	1	20	12	2977	0.0705922	0.355437	19	13.6167	2540.72	829.36	0.326427	3013	2603	2435	3816	1298	2295	2000	1893	3184	2262	3272	3190	1858	2219	2209	2976	2532.69
3281	unknown341	0.0299489	0.138103	18	6	3952.37	0.992231	1	20	5.99999	12785.2	0.1342	0.532443	19	6.01666	10006.8	3314.61	0.331236	11602	5294	6104	4023	15012	14609	9141	12379	10232	6038	5312	7966	11811	11319	10974	11866	9605.12
3353	unknown3475	0.0065055	0.0504817	18	12	526.264	0.143509	1	20	12	3377.5	0.00744679	0.0780741	19	12.0333	2768.32	680.41	0.245785	2378	2823	1884	2765	2173	3016	2856	2429	3526	3126	3505	3353	2270	2517	2082	2304	2687.94
3376	unknown3496	0.0144977	0.086706	24	18	1284.28	0.281691	1	28	18	9696	0.0265481	0.187956	26	18.1071	7789.65	459.326	0.0589662	7401	8538	2605	3891	7055	7171	8308	7402	7621	9409	8389	8451	10329	10672	8970	8813	7814.06
3377	unknown3497	0.0210199	0.109923	24	18	882.116	0.364483	1	28	17.9999	9025	0.0449843	0.267294	26	18.1071	7933.03	37.0754	0.00467355	8427	8703	4302	5088	6228	7930	7762	7678	9493	8266	8150	8833	9091	9452	8851	8706	7935
3385	unknown3503	0.0419656	0.170301	24	0	296.808	0.784462	1	26.0177	17.9999	3534.25	0.1453	0.55974	25.0088	21.1554	3534.1	616.412	0.174418	3513	3958	3633	6113	1789	3560	3550	2941	3216	3252	2937	3493	3482	3672	3634	3349	3505.75
3386	unknown3504	0.0210199	0.109923	24	15	794.258	0.260656	1	27.6489	12	5096.75	0.034007	0.220261	25.8245	13.6742	4101.88	1139.24	0.277736	3694	4731	803	1198	3471	4771	4380	3993	5205	4589	5164	5429	5522	3945	4587	4780	4141.38
3397	unknown3514	0.0299489	0.138103	18	3	589.727	0.437248	1	28	6	8425.25	0.0698692	0.354255	23	4.38095	8680.37	692.242	0.079748	8646	6125	6680	8315	8278	10087	7806	7530	7536	6038	6708	7578	12831	12921	10735	10915	8670.56
3403	unknown352	0.0299489	0.138103	18	6	2888.53	0.936944	1	20	6	10295.2	0.128332	0.519323	19	6.01667	8093.9	2737.38	0.338202	8148	4784	5017	3080	11705	10602	8272	10602	8563	5627	5474	7630	8216	8882	8578	9015	7762.19
3422	unknown3537	0.0419656	0.170301	24	21	1275.97	0.588969	1	20.6557	17.9999	15884.5	0.116174	0.485958	22.3279	19.497	13945.5	1666.06	0.119469	16111	15898	11359	14782	4983	14318	13850	12189	14928	12724	14335	16155	16445	15115	14942	17036	14073.1
3429	unknown3543	0.0419656	0.170301	18	0	2639.28	0.604389	1	28	17.9999	9778.5	0.11856	0.49126	23	18.8928	18193.3	15804.8	0.868719	11240	13041	76443	90543	5582	9010	10545	8853	8798	9408	8825	10352	7572	10163	10229	11150	18859.6
3449	unknown3561	0.0210199	0.109923	18	0	6923.64	0.420207	1	23.2718	17.9999	58549.5	0.0506051	0.285047	20.6359	18.2985	54471.5	7004.79	0.128595	58675	67893	59464	63003	38528	57816	47741	48481	51046	55811	52043	53362	54278	68748	61824	49348	55503.8
3451	unknown3563	0.0210199	0.109923	18	0	2049.2	0.400491	1	28	12	14114.5	0.0486353	0.281538	23	4.92857	14517.1	2621.46	0.180577	16045	18315	16781	16998	10768	15385	12940	13179	14038	14463	14004	13953	14800	14167	13615	13687	14571.1
3453	unknown3565	0.00980952	0.0660579	24	15	908.102	0.219302	1	20.7529	12	6638.5	0.0153636	0.128686	22.3765	13.462	5558.05	1230.36	0.221365	4759	5594	4129	5209	2675	5260	5642	4588	5650	5922	6851	8131	6252	6112	5595	6094	5528.94
3477	unknown3587	0.0210199	0.109923	24	21	5387.62	0.0967423	1	25.1282	17.9999	37326.2	0.0146372	0.124762	24.5641	19.5447	31111.7	5525.07	0.177588	34846	27610	26842	37756	20716	29767	27365	26836	28213	26928	30401	29131	36896	39649	35591	37169	30982.2
3493	unknown3600	1.91e-05	0.00150306	18	0	28526.1	0.136264	1	20	18	149418	3.61e-05	0.002739	19	18.05	128350	31416.2	0.244769	151138	151598	152656	212091	74347	112300	105774	104018	120041	115606	123115	142467	143681	163758	141895	148339	135176
3494	unknown3601	0.00421867	0.0379768	18	0	1191.12	0.23571	1	20	17.9999	8997.5	0.00786892	0.0813165	19	18.05	7920.27	1520.7	0.192001	8732	8687	9056	12398	4642	7122	7204	6721	7562	7025	7949	8923	8703	9423	8597	9267	8250.69
3495	unknown3602	0.0144977	0.086706	24	15	1450.63	0.239241	1	27.6489	12	7740.25	0.0231139	0.172557	25.8245	13.6742	5941.43	2073.33	0.348962	5314	6467	467	777	3848	7169	6286	6885	5821	7758	8739	8643	7560	6852	6675	6952	6013.31
3521	unknown3626	0.0299489	0.138103	24	21	990.48	0.385121	1	21.0501	17.9999	7930.5	0.0630039	0.332484	22.5251	19.4853	6973.59	977.543	0.140178	9794	7977	6662	5554	5774	5829	5945	5485	7842	6262	7023	6759	7361	8430	8776	7155	7039.25
3522	unknown3627	0.0210199	0.109923	18	0	11190.7	0.447422	1	20	17.9999	136680	0.0532924	0.295084	19	18.05	128416	11098.2	0.0864232	151561	143286	114315	152602	92930	124406	122946	109868	128495	124976	133222	147914	135085	145348	136750	129539	130828
3540	unknown3643	0.0144977	0.086706	24	15	1743.37	0.141532	1	26.6465	12	8541.25	0.014751	0.125485	25.3233	13.6156	6168.03	2805.39	0.454828	4411	6415	392	486	4087	7135	7095	6811	6102	8435	10936	8692	8012	6951	6853	6993	6237.88
3543	unknown3646	0.0299489	0.138103	24	18	894.844	0.318976	1	28	17.9999	6458.5	0.0539831	0.296257	26	18.1071	5139.75	190.393	0.0370432	5320	5430	1672	1791	2393	5601	5873	4841	5517	5751	5968	6407	6571	6588	5811	6864	5149.88
3555	unknown3657	0.0419656	0.170301	24	12	539.522	0.354675	1	25.4179	12	5340	0.0775086	0.376669	24.7089	12.0099	4651.99	756.303	0.162576	3904	5236	2585	3568	4302	4742	5294	4924	4865	5594	5500	5401	4152	5627	4746	4276	4669.75
3590	unknown3689	0.0210199	0.109923	24	15	1696.7	0.357862	1	28	12	11763.8	0.0443051	0.26534	26	13.6964	9874.85	1821.91	0.1845	11210	10003	1870	4476	6878	11712	9600	9674	10360	12581	12386	11728	11692	12189	10765	11984	9944.25
3633	unknown396	0.0210199	0.109923	18	0	1064.02	0.720842	1	28	12	2539.25	0.0786332	0.380048	23	4.92857	2719.46	2405.57	0.884574	2507	3481	6501	8192	572	1416	1756	1915	2253	2342	2289	3273	1696	1385	2421	2306	2769.06
3637	unknown4	0.0210199	0.109923	18	6	6323.66	0.946905	1	20	6.00001	58717.5	0.0978639	0.43551	19	6.01667	53846.5	5210.41	0.0967643	57522	48438	42484	50018	64775	66028	51463	52604	51394	42661	43697	43380	60608	60750	56879	58740	53215.1
3644	unknown405	0.000320124	0.00696552	18	0	1824.87	0.409817	1	20	12	4086.5	0.0013039	0.0249469	19	15.2	3992.84	1909.39	0.478203	5566	6052	6696	5863	1501	2421	2964	3275	4042	3432	4339	4533	3095	3647	4990	4566	4186.38
3645	unknown406	0.000171384	0.00472671	18	0	621.9	0.1232	1	24.2975	17.9999	1511.25	0.000248424	0.00925533	21.1488	18.408	1188.69	636.898	0.5358	1447	1630	1878	2687	552	918	670	509	843	649	1061	1396	1565	1870	1184	1426	1267.81
3647	unknown408	0.000320124	0.00696552	18	0	1766.18	0.329075	1	26.0177	17.9999	4022.25	0.00107012	0.0214803	22.0088	18.6177	3960.92	1428.92	0.360754	5394	5781	6676	5797	1527	2518	2798	3121	3844	3360	4079	4348	3022	3772	4824	4471	4083.25
3648	unknown409	0.0299489	0.138103	18	0	1146.93	0.284011	1	24.0327	17.9999	6693.24	0.0490531	0.281862	21.0163	18.3786	5486.33	1318.82	0.240383	6698	6023	5835	7722	4481	5419	3552	4853	6069	4168	3978	4958	6280	5740	5398	9355	5658.06
3651	unknown411	1.91e-05	0.00150306	18	0	3470.83	0.102477	1	24.4321	17.9999	11427.5	2.77e-05	0.00226087	21.2161	18.4233	10356.5	2860.19	0.276173	13775	13093	14324	14142	5877	9045	7829	8157	10292	7832	9751	11424	10252	11925	12001	11532	10703.2
3654	unknown414	0.000171384	0.00472671	18	0	3300.07	0.300667	1	27.1385	17.9999	3782.5	0.000560299	0.0147036	22.5692	18.7693	4151.93	2948.35	0.710117	5620	7128	9967	11252	556	1604	2043	1610	2890	2806	4104	4592	2233	3735	4638	4524	4331.38
3655	unknown415	8.77e-05	0.00321778	18	0	2333.81	0.259631	1	27.3065	17.9999	2876	0.000266151	0.00940301	22.6533	18.7929	3173.97	2190.59	0.690174	4358	5199	7733	8392	933	1259	1478	1334	2059	2060	3041	3438	1825	2730	3444	3505	3299.25
3705	unknown460	0.00421867	0.0379768	18	0	827.668	0.184678	1	24.5682	17.9999	5529.75	0.00635537	0.0699608	21.2841	18.439	5113.96	813.012	0.158979	6326	6758	4975	6099	4554	4781	4428	4307	4691	3730	5448	5144	5712	5690	4983	5734	5210
3707	unknown462	0.000572095	0.00994847	18	0	2885.88	0.0439955	1	24.4321	17.9999	7700.48	0.000291712	0.00994578	21.2161	18.4233	6150.31	2783.18	0.452526	10735	7466	9834	8910	3015	4514	4383	4614	3983	3464	5404	6678	8508	8403	7388	6503	6487.62
3711	unknown466	0.000987235	0.0140155	18	0	272.236	0.563144	1	27.6489	17.9999	870.749	0.00472275	0.0568041	22.8245	18.8418	1054.94	713.638	0.676475	896	994	2855	4136	587	575	526	594	813	475	831	682	766	942	806	969	1090.44
3750	unknown500	0.0210199	0.109923	18	15	12179.6	0.201193	1	20	12	80102.5	0.0273441	0.192248	19	13.6167	70330.6	13651.4	0.194103	68688	83825	69330	58975	50901	63997	47398	67562	72380	75668	88138	84224	78894	68641	74615	69938	70198.4
3755	unknown505	0.0065055	0.0504817	18	15	13941.5	0.23824	1	20	12	97773.5	0.0115769	0.105532	19	13.6167	84351.9	17613.4	0.208808	80191	100764	83602	73062	64270	79136	57008	79754	93717	88327	106435	102615	92879	79952	86045	79144	84181.3
3757	unknown507	0.0419656	0.170301	18	6	5475.48	0.526441	1	20	6	18678.8	0.10632	0.459448	19	6.01667	14270.1	4586.16	0.321382	18666	10141	10563	7310	19900	21231	15338	18246	17103	10866	8146	9340	14761	12704	11835	13280	13714.4
3761	unknown510	0.0419656	0.170301	18	15	11969.2	0.280987	1	20	12	99136.2	0.0641514	0.33655	19	13.6167	88221.6	13932.4	0.157925	87023	103624	86008	68702	72878	82908	60791	85025	94705	93596	103968	104276	99617	82498	92200	91568	88086.7
3775	unknown523	0.0065055	0.0504817	18	0	546.947	0.575825	1	28	17.9999	2358	0.0246753	0.179111	23	18.8928	2759.15	1255.09	0.454883	2710	2676	6517	7342	862	1829	2118	2395	2398	2296	1986	2432	2265	2383	2555	2229	2812.06
3792	unknown539	0.0065055	0.0504817	18	0	2661.55	0.587856	1	28	12	13699.2	0.0251118	0.180621	23	4.92857	14060.9	4547.44	0.32341	16201	16761	17892	21800	7424	12600	12387	13333	13485	12924	14252	14136	11546	14824	14414	12496	14154.7
3798	unknown544	0.0419656	0.170301	18	0	5091.17	0.367751	1	25.8651	18	78883.7	0.0798074	0.382383	21.9326	18.5979	78119.6	4990.09	0.0638776	85964	90473	86355	76823	72442	77032	70113	77469	75366	77313	75052	77084	77314	75301	84974	77946	78563.8
3800	unknown546	0.00421867	0.0379768	18	0	405.172	0.631787	1	27.1385	12	2557.5	0.0184637	0.147234	22.5692	4.98981	2600.94	695.669	0.267468	2771	3893	2977	3170	1752	2469	2169	2326	2444	2700	2680	2406	2732	2612	2679	2161	2621.31
3803	unknown549	0.0299489	0.138103	18	15	4453	0.499441	1	20	12	25509.8	0.077818	0.377749	19	13.6167	23639.8	5010	0.21193	27260	28955	22690	28391	11941	19988	21243	20399	28680	23100	24087	26172	23732	22993	24151	23679	23591.3
3808	unknown553	0.0299489	0.138103	18	0	1714.03	0.536899	1	20	17.9999	20388.2	0.0824915	0.391144	19	18.05	19629.8	1598.12	0.081413	21907	24413	19329	21511	14418	18687	17462	19299	21605	19577	18999	20873	19771	19442	20328	22012	19977.1
3809	unknown554	0.0144977	0.086706	18	15	747.235	0.52843	1	20	12	5979.25	0.0449826	0.267294	19	13.6167	5608.71	873.46	0.155733	6242	6207	5402	6445	3431	4984	5230	5157	6572	5388	5706	6251	5782	5317	5610	5880	5600.25
3813	unknown558	0.0359573	0.164931	18	0	210.011	0.385847	1	20	12	3092.5	0.0732233	0.364015	19	15.2	2932.09	415.296	0.141638	3247	3456	3036	3126	2177	2840	2410	2860	3231	2924	2952	3263	2952	3077	2900	3136	2974.19
3838	unknown580	0.0419656	0.170301	24	21	1558.46	0.227027	1	24.0327	17.9999	7870.99	0.0538636	0.295977	24.0163	19.501	6756.39	1544.62	0.228616	6586	6254	7785	10180	5440	6644	5035	5285	5225	4999	5598	7570	7698	8125	7124	8537	6755.31
3841	unknown583	0.0144977	0.086706	18	3	4254.84	0.148402	1	24.0327	6.63e-05	64093.7	0.0153651	0.128686	21.0163	1.75139	57873.6	8793.54	0.151944	63090	55720	64549	73016	53646	58028	45318	53553	50722	45092	50160	63025	62815	64716	63712	69721	58555.2
3882	unknown62	0.0299489	0.138103	18	15	226.981	0.267726	1	20	12	3464.75	0.0467139	0.273709	19	13.6167	3280.97	313.12	0.0954353	3427	3363	3223	3285	3208	2985	3008	2555	3438	3215	3585	3621	3294	3234	3195	3811	3277.94
3903	unknown639	0.00344533	0.0358613	18	6	575.938	0.932486	1	20	6	2972.75	0.0216558	0.165087	19	6.01667	2594.81	386.279	0.148866	2450	2455	1882	2484	3267	3404	2490	2730	2382	1330	1659	2055	2698	2982	2382	4118	2548
3938	unknown670	0.000171384	0.00472671	18	0	925.426	0.361992	1	26.8085	17.9999	2752.25	0.000663063	0.0165004	22.4043	18.7235	2804.3	1105.98	0.394387	3482	3218	5467	5415	999	1908	2105	2332	2538	2691	2177	2733	2118	2764	3352	2775	2879.62
3942	unknown674	0.0210199	0.109923	18	0	1091.77	0.254385	1	26.3284	17.9999	3722	0.0333191	0.218925	22.1642	18.6586	3678.48	936.452	0.254576	4971	3797	5827	5487	1998	3361	2967	3616	3643	3183	2909	3388	3144	4009	4405	3330	3752.19
3955	unknown686	0.0299489	0.138103	18	6	13174.1	0.917445	1	20	6	53653	0.126239	0.513252	19	6.01667	43163.7	9060.2	0.209904	33554	44017	36591	51013	44747	70200	55357	44308	26251	12339	20421	31737	28928	43547	27598	102444	42065.8
3979	unknown707	0.0210199	0.109923	18	0	356.382	0.557073	1	28	17.9999	828.25	0.0637862	0.335595	23	18.8928	1268.74	903.091	0.711803	958	1355	3689	5681	614	914	666	607	794	564	900	854	880	709	791	933	1306.81
3983	unknown710	0.0299489	0.138103	24	12	741.401	0.177017	1	24.4321	12	7577	0.03308	0.218348	24.2161	12.001	6669.4	893.726	0.134004	6058	6465	5157	5230	7533	7314	5608	6223	7830	7061	7790	7627	7155	7495	6236	6030	6675.75
4018	unknown742	0.0299489	0.138103	18	0	314.132	0.703512	1	28	17.9999	870	0.102396	0.446612	23	18.8928	1342.64	932.072	0.694209	1104	1152	3389	6588	591	972	741	655	957	631	874	977	1081	719	820	860	1381.94
4044	unknown766	0.0210199	0.109923	18	0	441.588	0.772199	1	28	12	1335.5	0.0831184	0.391624	23	4.92857	1718.85	1225.89	0.713206	1709	1728	2764	6508	1212	1368	1005	992	1491	968	1321	1562	1683	1053	1157	1385	1744.12
4053	unknown774	0.0065055	0.0504817	24	3	965.378	0.110477	1	28	6.63e-05	7392.99	0.00592077	0.0674656	26	1.62503	5503.17	695.718	0.126421	6575	6729	7285	8983	4988	5610	5091	4638	4232	3955	4670	5562	4303	4538	4495	6186	5490
4185	unknown893	0.0210199	0.109923	24	21	413.657	0.223444	1	20	17.9999	3904.25	0.0298756	0.204685	22	19.525	3539.07	451.375	0.127541	4574	4158	3133	3711	2493	3325	3269	2446	3592	3391	3572	4011	3732	3909	3779	4197	3580.75
4191	unknown899	0.000320124	0.00696552	18	0	362.392	0.583087	1	27.3065	17.9999	2167.75	0.00178937	0.0302655	22.6533	18.7929	2284.68	784.793	0.343503	2316	2313	3806	5502	1171	1875	1962	1706	1948	2060	1887	2056	2241	2346	2040	2044	2329.56
4219	unknown923	0.0299489	0.138103	18	0	939.215	0.743043	1	25.7143	17.9999	4420.25	0.106933	0.461636	21.8571	18.5785	4318.72	1150.5	0.266398	4638	4113	7476	7253	1931	3757	4046	2827	4608	3643	4232	4595	4459	5073	4491	3658	4425
4224	unknown928	0.0210199	0.109923	24	15	3268.6	0.343655	1	26.1721	12	18956	0.0428388	0.259673	25.0861	13.5904	15428.6	3409.97	0.221016	19319	16139	3915	5612	11990	15180	15555	12271	19532	17741	18054	20497	17966	19539	17512	17143	15497.8
4228	unknown931	0.0210199	0.109923	24	15	1406.79	0.342972	1	26.8085	12	7537.75	0.0427679	0.259673	25.4043	13.6245	6172.65	1299.87	0.210585	7678	6295	1563	2358	4909	6230	6322	4746	7663	6965	7221	8302	7192	8157	6922	6790	6207.06
4266	unknown966	0.0299489	0.138103	24	21	835.093	0.117147	1	23.9024	17.9999	5042.24	0.0233402	0.173648	23.9512	19.497	4447.82	835.089	0.187753	5374	5207	3848	5433	3226	4348	3957	3622	4102	3801	3761	4345	4802	5271	4564	5532	4449.56
4267	unknown967	0.00536208	0.0479707	18	0	2579.88	0.115735	1	23.3952	17.9999	17981.7	0.00520347	0.0617238	20.6976	18.311	15770.3	2768.43	0.175547	19159	19520	14664	19992	11254	14176	15159	13263	14479	14720	14664	15752	17261	18573	15886	20207	16170.6
4277	unknown976	0.0177588	0.105917	24	0	460.327	0.541577	1	24.8451	17.9999	4492.75	0.054284	0.297155	24.4225	21.0582	4306.23	670.373	0.155675	5674	4775	4182	5462	2057	4247	4211	4342	4186	3639	3734	4211	4244	4485	4380	4862	4293.19
4293	unknown990	0.000572095	0.00994847	18	0	617.481	0.113892	1	20	17.9999	3921.75	0.000693186	0.0169281	19	18.05	3499.97	582.332	0.166382	4111	4475	4269	3890	2383	3333	3203	2969	3025	3694	3504	3481	4140	3878	4265	3404	3626.5
4295	unknown992	0.0144977	0.086706	18	0	733.093	0.21589	1	23.1496	17.9999	10349.7	0.0211794	0.162026	20.5748	18.2864	9693.28	875.362	0.090306	10262	11311	10929	9691	7676	9776	8945	9337	9426	9657	8900	9886	10689	10719	10374	9617	9824.69
4302	unknown999	0.0065055	0.0504817	18	0	374.059	0.366097	1	26.1721	17.9999	2422	0.0167667	0.13621	22.0861	18.6379	2389.73	365.282	0.152855	2725	2628	2777	3434	1810	2280	2210	2022	2488	2004	2235	2415	2738	2419	2177	2354	2419.75
4303	Uracil	0.0419656	0.170301	18	0	2473.46	0.612325	1	20	12	20203.5	0.119782	0.493958	19	15.2	19212.2	4162.31	0.21665	22323	22198	19607	26792	11047	18669	17810	15594	21003	20576	18856	20379	20083	18753	18026	22429	19634.1
4305	Urea	0.000320124	0.00696552	24	0	1434.01	0.135215	1	24.9858	6.63e-05	6389.73	0.000478207	0.0136243	24.4929	3.25e-05	4457.31	2050.35	0.459997	5489	6374	5375	8321	3724	3417	3394	2888	2902	3095	3708	2584	4096	3872	3855	7722	4426
4323	Val-Thr	0.0419656	0.170301	18	0	4789.23	0.789039	1	26.3284	17.9999	41437.7	0.145955	0.561763	22.1642	18.6586	41106.3	5766.92	0.140293	46099	42336	51603	56521	19752	45873	39846	39725	40728	35606	39506	41618	40546	43987	40165	41053	41560.2

## Sheet: unique cycling AS in TS
ID	CycID	JTK_pvalue	JTK_BH.Q	JTK_period	JTK_adjphase	JTK_amplitude	LS_pvalue	LS_BH.Q	LS_period	LS_adjphase	LS_amplitude	meta2d_pvalue	meta2d_BH.Q	meta2d_period	meta2d_phase	meta2d_Base	meta2d_AMP	meta2d_rAMP	X0	X0.1	X0.2	X0.3	X6	X6.1	X6.2	X6.3	X12	X12.1	X12.2	X12.3	X18	X18.1	X18.2	X18.3	TS
10	1,7-Dimethyluric acid	0.182589	0.239506	24	6	128.87	0.172616	0.334757	20	6	829.25	0.140481	0.210698	22	6.05	665.013	116.085	0.17456	653	782	535	711	584	957	934	842	477	590	600	481	691	578	515	595	657.812
20	2'-Deoxyadenosine	0.0579045	0.0920774	24	0	5223.75	0.223411	0.402837	23.9024	6.63e-05	18161.7	0.0691807	0.114639	23.9512	3.32e-05	13520.8	5866.61	0.433896	18390	21423	15230	17604	7743	11102	15424	12713	7575	8943	8712	10113	19457	21657	13691	6706	13530.2
21	2'-Deoxyguanosine	0.122638	0.173367	24	3	19.799	0.368335	0.576887	20	5.99998	233.25	0.185082	0.267225	22	4.67499	211.439	28.5639	0.135093	171	260	216	259	197	192	285	259	110	170	169	174	250	234	235	188	210.562
32	3-Amino-1-propanol	0.0787266	0.117791	18	6	3859.04	0.268864	0.459424	20	6	51892.8	0.102771	0.160522	19	6.01667	46965.4	4111.83	0.0875502	48113	48592	42314	49903	44163	59383	51230	52795	39526	39584	41901	44334	51543	45333	41642	43118	46467.1
76	Acetyl-L-threonine	0.235786	0.2987	24	3	184.732	0.867001	1	20	6.63e-05	1257.75	0.528964	0.664081	22	1.37504	1088.48	331.982	0.304996	1104	1059	1546	1322	987	991	1452	1161	459	788	839	1094	1209	2047	836	804	1106.12
82	Ala-Ala-Arg	1	1	24	12	260.215	1	1	20	12	4624	1	1	22	12.1	4276.99	383.423	0.0896477	4564	5342	3643	3475	3914	5070	2602	5036	4832	4697	5191	3776	5518	2394	4659	3357	4254.38
86	Ala-Asp	0.587657	0.676024	18	3	618.365	0.813589	1	20	5.99999	9515.25	0.830916	0.971608	19	4.43333	9115.24	646.997	0.0709797	9518	8658	9376	10064	9582	9849	9340	9290	7926	9074	7928	8534	10084	10457	7277	8749	9106.62
88	Ala-Glu	1	1	18	6	232.992	0.999927	1	20	6.00001	6236	1	1	19	6.01667	5862.6	379.935	0.0648066	5383	5885	5630	5702	5702	5409	7417	6416	4982	5371	5738	5821	6370	7566	5230	4443	5816.56
101	Ala-Thr	0.0579045	0.0920774	18	6	1539.37	0.180447	0.346184	20	5.99998	13768.8	0.0581082	0.0991756	19	6.01666	12358.6	964.681	0.0780575	12274	13144	13269	13375	12209	14963	14571	13332	8508	8869	11412	10152	14254	14685	10275	10575	12241.7
107	alpha-Galactosamine-1-phosphate	0.139706	0.189099	24	3	159.983	0.140885	0.294411	20	6.00001	873.75	0.0969959	0.152891	22	4.675	726.228	170.343	0.234558	830	663	957	688	878	810	897	910	408	578	517	690	607	843	747	513	721
108	Androstane-3,17-diol	0.139706	0.189099	24	3	251.023	0.907856	1	28	6.63e-05	2027.24	0.388729	0.509134	26	1.62503	1122.5	452.306	0.402945	5157	864	690	1398	1129	609	1014	1144	509	901	509	605	734	711	1256	593	1113.94
149	Biliverdin	0.0579045	0.0920774	18	6	118.44	0.26151	0.450592	20	6	265	0.0785937	0.128033	19	6.01667	161.632	91.8649	0.568357	198	207	82	108	259	247	308	246	60	79	31	34	78	25	348	98	150.5
193	DL-o-Tyrosine	0.0787266	0.117791	24	6	50.5581	0.0783872	0.212268	20	6.00001	323.25	0.0375692	0.0693118	22	6.05	237.626	75.5898	0.318104	197	218	267	171	371	304	328	290	160	203	185	232	255	210	143	193	232.938
194	DMSO	1	1	24	6	144.957	0.999918	1	20	6	3284	1	1	22	6.05	3149.8	82.4052	0.0261621	3767	2990	3441	2517	3612	3066	3572	2886	2661	3491	2969	2985	3095	3011	2970	3282	3144.69
211	gamma-Glutamyltyrosine	0.235786	0.2987	18	3	1622.81	0.645034	0.871722	20	6.63e-05	15907.5	0.438519	0.563773	19	1.58336	14636.3	2076.09	0.141846	15336	16381	15469	16444	12821	14063	16653	15967	11113	11539	14139	14159	17912	20333	12982	14503	14988.4
227	Glucose-1-phosphate	0.427597	0.51545	18	9	484.191	0.98708	1	27.4766	5.99998	2646.75	0.786143	0.932603	22.7383	8.16723	2315.63	301.256	0.130097	1562	1894	1749	2080	2247	2452	2633	3255	1613	2258	2617	2910	1749	1864	2510	3381	2298.38
228	Glucose-6-phosphate	0.0787266	0.117791	18	9	629.679	0.635993	0.86111	20	6.00001	4252.25	0.199995	0.285707	19	7.60001	3327.52	719.606	0.216259	2286	2562	2237	2897	3482	3496	4824	5207	2292	2974	3084	3057	2169	2516	3552	4342	3186.06
237	Glu-Phe	0.0787266	0.117791	18	3	1688.22	0.514271	0.735879	20	6	12249.8	0.170319	0.248394	19	4.43333	11547.1	1811.95	0.156919	11833	13327	12198	10059	10950	10832	12876	14341	8219	9615	9851	10107	13436	14366	11023	11334	11522.9
241	Glu-Tyr	0.380147	0.45889	18	3	440.174	0.860931	1	20	6.63e-05	5957.25	0.692832	0.837745	19	1.58336	5567.97	658.763	0.118313	5691	6917	5798	5423	5323	5229	6341	5909	4186	4815	5372	5386	6684	7595	4758	5448	5679.69
245	Glyceric acid	0.235786	0.2987	24	6	132.229	0.976732	1	28	6.63e-05	1441.25	0.568466	0.707519	26	3.25003	1226.3	137.629	0.112231	1126	1155	1300	2184	1123	1306	1187	1298	901	1034	1246	1647	899	1064	1012	1103	1224.06
254	Gly-Pro	0.182589	0.239506	18	0	495.328	0.715297	0.937704	23.7736	17.9999	4989.5	0.396462	0.51754	20.8868	18.3505	4695.67	474.607	0.101073	5598	5760	5230	4208	4798	4229	4040	4107	4262	4814	4460	4700	5968	5188	4635	4167	4760.25
255	Gly-Pro-Ala	0.0579045	0.0920774	24	0	350.725	0.409857	0.623352	22.9091	6.63e-05	2653.25	0.112514	0.173623	23.4545	3.39e-05	2372.61	421.344	0.177587	2618	2990	2239	2766	2036	2164	2514	2354	1827	2105	1978	2190	3051	3007	2211	2039	2380.56
262	Gly-Tyr	0.301037	0.372426	18	3	896.258	0.736159	0.957227	20	6.63e-05	9419	0.555542	0.693426	19	1.58336	8909.09	1304.08	0.146376	9103	9794	9278	9501	8239	9404	9354	9829	6641	7268	8826	8032	12281	11798	7733	9003	9130.25
266	Guanine	0.475047	0.559107	24	0	95.1059	0.597045	0.823576	24.9858	6.63e-05	918.499	0.641021	0.786072	24.4929	3.25e-05	796.346	124.976	0.156937	845	982	935	912	702	759	849	761	440	691	776	853	869	1002	688	647	794.438
267	Guanosine	0.105571	0.149581	18	3	2504.93	0.396495	0.608155	20	6.63e-05	19530	0.174694	0.25426	19	1.58336	17378	2356.4	0.135597	20522	20123	20649	16826	16356	18742	19019	18394	12081	14991	16597	15797	22253	20617	17018	14457	17777.6
271	Hexanoyl-L-carnitine	0.587657	0.676024	18	9	2279.36	0.999093	1	28	6.00002	10916.5	0.899779	1	23	8.21429	9402.36	894.988	0.0951876	9362	6746	6393	2020	11034	10009	11798	10825	9930	11442	9356	4560	17974	15013	8158	5166	9361.62
310	Ile-Val-Arg	0.139706	0.189099	24	3	334.108	0.541932	0.768106	22.1053	5.99997	1277	0.271109	0.373379	23.0526	4.56934	1068.21	188.683	0.176636	1705	1361	1217	773	1480	1480	830	1318	508	1181	739	779	894	661	805	1313	1065.25
314	Isoleucine	0.0787266	0.117791	24	0	24101.2	0.402394	0.61505	23.0287	6.63e-05	213924	0.141039	0.211314	23.5144	3.39e-05	192455	29918.6	0.155457	214982	219114	220753	200846	168838	184018	202235	186563	141581	169993	174312	183475	243136	235476	186088	155874	192955
319	Kynurenine	0.105571	0.149581	24	3	298.046	0.568252	0.794489	21.4599	6.63e-05	1858	0.228779	0.320898	22.7299	1.42066	1588.5	350.14	0.220422	1513	1899	2046	1974	1722	1549	1545	2206	736	1087	1210	1912	1507	1138	1502	2036	1598.88
326	Leu-Asn	0.0579045	0.0920774	18	6	7181.2	0.19032	0.359235	20	5.99998	33442.5	0.0607004	0.102771	19	6.01666	26686.1	6495.54	0.243405	23452	26435	23415	23901	28336	35308	34103	36023	15998	18004	24413	23824	33121	23413	20320	24318	25899
333	Leu-Leu-Lys	0.139706	0.189099	24	3	546.24	0.605433	0.830911	26.4865	5.32e-05	3736	0.293504	0.400193	25.2432	1.57773	2934.84	699.498	0.238343	4618	3840	3781	2705	3511	3577	1950	2598	1587	3034	2240	2521	3164	1361	2713	3584	2924
355	Lys-Met	0.0787266	0.117791	18	9	680.944	0.0567603	0.185039	20	6	7059.5	0.0286465	0.0553006	19	7.6	5366.82	1208.52	0.225184	4370	5865	3926	3668	7474	6831	6529	7404	3946	4487	4712	4628	5068	3830	4634	4696	5129.25
374	Methionine	0.0579045	0.0920774	24	0	14527.2	0.197495	0.368442	24.7059	6.63e-05	101071	0.0625657	0.105412	24.3529	3.27e-05	87194.5	15709.1	0.180161	102679	106657	102723	92225	74164	76152	87459	79394	65719	77195	76415	86174	100000	110524	80468	74372	87020
383	Methylsuccinic acid	0.105571	0.149581	24	3	335.522	0.476489	0.698678	26.3284	7.23e-05	3238	0.200694	0.286611	25.1642	1.5728	2616.38	584.034	0.223222	3466	4390	2365	2731	2109	3554	2456	2562	1619	2074	2270	2537	2362	2499	2150	2579	2607.69
415	N-Acetylhistidine	1	1	18	15	186.499	0.998204	1	20	17.9999	1427.5	0.999998	1	19	16.4666	1305.84	215.11	0.164729	1083	1323	1371	2247	869	1046	1091	1447	758	1056	1478	2006	1480	1208	1204	1818	1342.81
428	Nitrazepam	0.301037	0.372426	24	12	258.624	0.536205	0.761604	20	12	997.5	0.455805	0.583225	22	12.1	547.214	470.833	0.860419	343	52	839	77	255	88	900	443	186	1403	972	1429	203	346	422	353	519.438
430	N-Lauroyl-L-arginine	0.182589	0.239506	18	9	742.816	0.918993	1	20	5.99998	4318	0.467316	0.595491	19	7.59999	3254.49	766.514	0.235525	2942	2368	2040	1648	3165	4628	5807	3672	3212	2792	2442	1919	4578	4518	2128	1802	3103.81
440	Octanoylcarnitine	0.139706	0.189099	18	9	798.677	0.998427	1	20	6	3104.75	0.414245	0.537136	19	7.6	2387.26	615.568	0.257856	1989	1478	1310	478	3584	2761	3067	3007	2445	2596	2215	835	4313	3069	2059	1054	2266.25
450	Pantothenic acid	1	1	18	15	3126.83	1	1	20	12	95449.2	1	1	19	13.6167	91324.1	5043.34	0.0552246	85430	94113	89561	97617	83780	91443	79398	98706	72775	94234	93419	121369	90503	76740	88211	103105	91275.2
451	Pantothenic acid	0.139706	0.189099	18	15	21445.1	0.475506	0.697524	20	12	120430	0.246565	0.343528	19	13.6167	104281	25428.9	0.24385	92662	106441	101726	131143	66108	77994	79757	95277	86203	117576	125654	152289	106260	97939	94642	132881	104034
453	Phe-Ala a	0.587657	0.676024	18	3	131283	0.605997	0.831158	20	6.63e-05	995894	0.723808	0.871548	19	1.58336	892761	113994	0.127687	1013830	978557	1022417	968772	818079	888883	1076445	981707	633632	785144	782275	860303	1110036	1170042	779844	723541	912094
484	Pro-Glu a	0.475047	0.559107	24	3	316.077	0.99963	1	28	12	2961.75	0.828513	0.969476	26	7.19643	2948.17	60.9319	0.0206677	3147	3697	3016	3164	3223	2858	2349	3103	2406	2756	4264	2421	3057	2460	2596	2574	2943.19
491	Pro-Lys	0.105571	0.149581	18	0	1037.86	0.987449	1	28	17.9999	6167.25	0.339945	0.455434	23	18.8928	6360.07	557.132	0.0875983	7075	8356	6680	7120	4799	8974	5449	4799	5218	7654	5689	5655	6458	6139	5643	6429	6383.56
494	Pro-Pro	0.105571	0.149581	24	0	3800.35	0.479516	0.701691	22.9091	4.24e-05	43510.2	0.201648	0.287879	23.4545	2.17e-05	38363.8	5718.84	0.149069	45241	52457	41372	34971	39788	38256	35530	39734	29343	36076	32953	32171	49962	35301	39877	32517	38471.8
509	Pyroglutamic acid	0.0579045	0.0920774	18	6	23664.7	0.153548	0.310511	20	6.00001	133566	0.0508814	0.0890427	19	6.01667	111586	21657.8	0.194091	112174	113941	93106	92061	129466	149473	128432	126891	107072	106010	92341	82219	124394	99662	94939	91205	108962
516	Ribose A	0.235786	0.2987	24	6	587.606	0.483946	0.706265	20	6.00001	5627.75	0.361792	0.479657	22	6.05001	4804.84	666.481	0.13871	4294	5288	4064	5307	4081	6343	6117	5970	3740	4983	4747	3855	4963	4380	3572	4512	4763.5
517	Ribose B	0.719948	0.813936	24	0	265.519	0.864616	1	26.4865	17.9999	1530	0.917562	1	25.2432	21.1991	1549.96	189.795	0.122452	1696	1715	1946	1840	1167	1545	1352	1404	1304	1886	1335	1318	1800	1875	1121	1324	1539.25
533	Ser-Met	0.0787266	0.117791	18	6	3104.02	0.292524	0.487714	20	6.00001	21422.8	0.109873	0.170086	19	6.01667	18735.5	2072.38	0.110612	17587	19837	19299	20183	18469	21398	22234	23590	11147	12339	16039	16900	24160	21546	15279	15743	18484.4
574	trans-Cinnamic acid	0.235786	0.2987	18	3	2539.57	0.509807	0.730707	20	6.63e-05	18114.5	0.374867	0.493817	19	1.58336	16117.8	2227.67	0.138212	18876	18266	17919	17397	14341	16126	19235	17720	11933	13633	14007	15369	20674	20715	14419	13300	16495.6
591	Tryptophan	0.235786	0.2987	24	0	17785.1	0.564809	0.790511	21.5648	7.97e-05	108350	0.401667	0.523073	22.7824	4.21e-05	94042	18486.9	0.196581	112574	109487	108957	102381	83264	77156	114211	96049	61686	75722	80023	87495	112562	139482	87097	69793	94871.2
620	unknown1014	0.719948	0.813936	18	3	459.619	0.924898	1	20	6.63e-05	2470	0.936656	1	19	1.58336	2161.43	543.248	0.251337	2391	2367	2779	2343	1776	2002	2900	2477	1376	1568	1729	1873	3184	4247	1687	1358	2253.56
627	unknown1020	0.235786	0.2987	24	21	1945.25	0.661576	0.887468	22.1053	18	13140	0.445815	0.572319	23.0526	19.4712	11365	2107.33	0.185423	11921	12665	12237	13647	7123	8426	12039	8975	9040	11026	12481	11126	15302	18036	10844	8378	11454.1
628	unknown1021	0.139706	0.189099	24	21	287.085	0.635265	0.860668	23.0287	17.9999	3221.5	0.303698	0.412488	23.5144	19.4773	3027.42	324.362	0.107141	3407	3389	3109	3197	2104	2922	3105	2780	2893	2934	3073	2750	3706	3512	3085	2583	3034.31
629	unknown1022	0.182589	0.239506	24	21	1514.98	0.713406	0.935792	20	17.9999	17330.5	0.395759	0.516778	22	19.525	16013	1658.51	0.103573	17204	18326	16025	17970	10429	14446	16165	15034	14883	16636	17040	15179	20231	20132	15521	13438	16166.2
698	unknown1085	0.0579045	0.0920774	18	6	348.604	0.225969	0.405994	20	6.00001	3796.25	0.0698238	0.115528	19	6.01667	3539	195.961	0.0553719	3138	3674	3576	3990	3758	3876	3636	3915	2801	3163	3052	3367	3921	3618	3375	3384	3515.25
701	unknown1088	0.719948	0.813936	18	3	89.8026	0.973345	1	20	5.99997	1151	0.949942	1	19	4.43332	1126.76	108.582	0.0963665	971	1165	1088	1242	1196	1093	1092	1223	839	943	1068	1170	1278	1420	1156	1061	1125.31
705	unknown1091	0.0787266	0.117791	24	21	398.101	0.371223	0.57945	23.2718	17.9999	3842.25	0.132469	0.200546	23.6359	19.4815	3464.57	402.061	0.11605	3660	4081	3528	3235	3432	3052	2808	2894	2891	3421	3817	3347	4377	3906	3931	3155	3470.94
707	unknown1093	0.0579045	0.0920774	18	3	229.456	0.818445	1	20	6.63e-05	2444.75	0.191904	0.275969	19	1.58336	2298.53	334.445	0.145504	2334	2868	2221	2356	2274	2206	2596	2395	1701	1883	2167	2198	2930	3212	2487	1856	2355.25
733	unknown1116	0.235786	0.2987	18	6	352.67	0.669056	0.893863	20	6.00001	5655.5	0.449082	0.576155	19	6.01667	4816.02	820.725	0.170416	4443	4688	4399	4409	7303	6026	4673	4620	3246	4143	4316	4838	5064	3670	4221	5406	4716.56
734	unknown1117	0.0579045	0.0920774	18	6	736.098	0.268518	0.459196	20	6	6054	0.0802889	0.130292	19	6.01667	5321.3	546.582	0.102716	5610	5598	5666	5205	5086	6337	7101	5692	3344	4290	4451	4148	6596	6276	4433	4248	5255.06
745	unknown1127	0.0579045	0.0920774	18	6	659.2	0.379956	0.589047	20	6	3549.25	0.105972	0.16482	19	6.01667	2871.68	630.197	0.219452	2367	2508	3095	2807	3071	3390	4296	3440	1861	2194	2240	2421	3216	3776	1989	2054	2795.31
780	unknown1159	0.475047	0.559107	18	6	179.959	0.758418	0.976204	20	5.99998	1509.5	0.728085	0.87583	19	6.01666	1383	93.8845	0.0678846	1193	1341	1484	1606	1180	1507	1823	1528	887	973	1213	1263	1649	1889	1152	1258	1371.62
781	unknown116	0.139706	0.189099	18	3	596.091	0.690578	0.914715	20	5.99998	3319.5	0.322086	0.43433	19	4.43333	3113.99	731.635	0.234951	2859	3762	2418	3253	2400	3263	3686	3929	1982	2436	2520	2286	3404	3476	3645	4349	3104.25
821	unknown1196	0.235786	0.2987	18	6	476.767	0.479207	0.701631	20	5.99998	3873.75	0.359361	0.477018	19	6.01666	3456.4	336.479	0.0973495	3038	3397	3493	4013	3681	4092	3958	3764	2260	2443	3107	3235	4296	4099	2963	2811	3415.62
833	unknown1206	0.301037	0.372426	18	3	2251.43	0.688253	0.912193	20	6.63e-05	15663.2	0.533331	0.668207	19	1.58336	13894.9	2559.07	0.184174	14284	15018	15812	17539	13133	13570	16557	15238	9358	10236	13305	12320	19214	20712	12007	10959	14328.9
861	unknown1231	0.380147	0.45889	24	0	711.703	0.813079	1	21.5648	5.34e-05	8181.25	0.671999	0.815972	22.7824	2.82e-05	7329.44	992.088	0.135357	7105	7274	8185	10161	6579	7090	7710	8095	5347	5518	6376	7931	9052	9151	6153	6256	7373.94
882	unknown1250	0.105571	0.149581	18	6	3088.64	0.407054	0.620613	20	6	15190.2	0.178217	0.258779	19	6.01667	12324.7	2424.53	0.196721	10844	10050	12760	15548	15594	13135	16822	15210	5860	7673	9660	11463	15098	16195	7563	9019	12030.9
883	unknown1251	0.139706	0.189099	18	6	667.155	0.3798	0.589016	20	6	4662.75	0.208863	0.296809	19	6.01667	3981.71	552.566	0.138776	3595	3552	4286	4779	4002	4524	5437	4688	2208	2877	3503	3713	4450	4834	2896	3292	3914.75
921	unknown1286	0.0787266	0.117791	18	6	964.494	0.387036	0.597883	20	6.00001	6159.5	0.136841	0.205952	19	6.01667	5323.34	640.781	0.120372	4887	5621	5229	6142	5010	5424	7640	6564	3107	3528	4053	4329	6943	6787	4043	4624	5245.69
924	unknown1289	0.235786	0.2987	18	6	488.964	0.461118	0.681215	20	6	3529.5	0.349979	0.466999	19	6.01667	3152.05	228.345	0.0724435	3120	2783	3334	4360	3751	3295	3672	3400	1701	2083	2417	2767	3987	4447	2250	2623	3124.38
929	unknown1293	0.235786	0.2987	18	6	522.198	0.821506	1	20	6	4988	0.511648	0.644397	19	6.01667	4727.77	164.149	0.0347201	4684	4686	4166	5753	4534	5222	5281	4915	3196	3557	3947	4391	6111	6736	4212	3935	4707.88
950	unknown1311	0.182589	0.239506	24	3	1623.16	0.491469	0.712614	20.9501	6.63e-05	12144.2	0.306081	0.414944	22.4751	1.40473	10515.2	2376.38	0.225996	11664	10282	12839	13792	9806	10734	11902	11415	6876	7459	9111	10066	13065	14180	7519	8952	10603.9
955	unknown1316	0.235786	0.2987	18	3	1644.38	0.400953	0.613256	20.2759	6.63e-05	9179.74	0.317533	0.428457	19.1379	1.59486	7684.01	1608.57	0.20934	8817	8237	8992	10673	6866	7567	9016	9051	5050	5619	6530	6803	10731	10704	5905	6575	7946
971	unknown1330	0.719948	0.813936	18	3	398.455	0.853691	1	20	6	2917.5	0.913783	1	19	4.43333	2735.95	465.787	0.170247	2778	2359	3049	3241	2741	2952	3096	2881	1851	1787	2425	2632	3397	4101	2177	2209	2729.75
983	unknown1341	0.0579045	0.0920774	24	0	604.753	0.254491	0.442193	23.3952	5.23e-05	5739.75	0.0768852	0.125865	23.6976	2.65e-05	5030.61	852.015	0.169366	5672	5495	5665	6127	4626	4915	4851	5166	3578	3788	4680	5040	6530	5478	4429	4589	5039.31
988	unknown1346	0.301037	0.372426	18	6	1599.12	0.904699	1	20	6.00001	13452.2	0.626584	0.771208	19	6.01667	12178.4	990.711	0.0813496	11515	11383	13521	12843	11102	13009	15211	14487	8476	8372	10538	10890	15548	18198	9448	8393	12058.4
996	unknown1353	0.139706	0.189099	18	6	1983.08	0.949794	1	20	6	14651.2	0.400694	0.522277	19	6.01667	13099.5	1848.68	0.141126	10412	11432	11232	12499	13281	15419	14713	15192	10944	10920	12852	14356	14381	15645	11286	11443	12875.4
1001	unknown1358	0.380147	0.45889	24	0	843.402	0.927489	1	24.4321	6.63e-05	9990.24	0.72014	0.867373	24.2161	3.29e-05	9156.82	1005.24	0.109781	9359	9051	10163	11388	9707	9307	7436	8169	6923	7939	8080	10928	9627	8089	8791	11441	9149.88
1002	unknown1359	1	1	18	3	558.968	0.951586	1	20	6.63e-05	4019.5	0.998809	1	19	1.58336	3659.33	544.92	0.148912	3535	3720	4261	4562	3140	3802	4667	3970	2488	2737	3478	3580	5048	5456	2734	2850	3751.75
1010	unknown1366	0.235786	0.2987	24	0	633.037	0.440839	0.656407	23.9024	6.63e-05	3327.75	0.339263	0.454801	23.9512	3.32e-05	2825.55	789.601	0.279451	3215	3412	3263	3421	1833	2565	2538	2794	1926	2192	2396	2689	4149	4370	2167	2299	2826.81
1013	unknown1369	1	1	18	6	654.781	0.994546	1	20	5.99999	5491.5	0.999985	1	19	6.01666	4922.37	598.766	0.121642	4038	3647	5303	5351	6135	5892	4976	4963	2951	4462	4733	6582	4799	4447	3773	5545	4849.81
1022	unknown1377	0.0787266	0.117791	18	9	634.275	0.261367	0.450526	20	6.00002	4291.25	0.100488	0.157535	19	7.60001	3434.17	689.819	0.200869	2439	2578	2963	3060	3793	4757	4541	4074	2280	2865	3243	3828	3295	3827	2498	2736	3298.56
1024	unknown1379	0.105571	0.149581	18	9	3937.35	0.354023	0.560073	20	6	26428.2	0.160216	0.236285	19	7.6	21815.7	4107.73	0.188293	15660	16159	21130	19609	28286	28886	25154	23387	13598	19794	21117	27258	19310	18784	15604	22395	21008.2
1035	unknown1389	0.380147	0.45889	18	6	698.798	0.999999	1	20	6	10196	0.747824	0.893757	19	6.01667	9798.07	426.078	0.0434859	8994	10156	9813	8972	7590	11282	10796	11116	8283	9729	9393	9809	11159	9007	9857	9987	9746.44
1058	unknown1409	0.182589	0.239506	18	6	750.594	0.666365	0.891644	20	6	5250.25	0.377962	0.496836	19	6.01667	4565.31	574.025	0.125736	4390	3866	4699	5274	4197	5264	5937	5603	2820	3335	4097	3971	5456	6122	3532	3369	4495.75
1090	unknown1438	0.380147	0.45889	24	3	1311.68	0.369136	0.577275	20	6.00001	8934.75	0.415897	0.538687	22	4.675	8072.28	998.963	0.123752	8403	7096	9177	10207	8622	8350	9654	9113	5449	5807	7278	7016	9721	9863	6278	6632	8041.62
1091	unknown1439	0.235786	0.2987	18	6	284.61	0.944455	1	20	6	2035	0.557164	0.695251	19	6.01667	1825.37	193.924	0.106238	1780	1449	1753	2031	1940	1943	2183	2074	1404	1328	1649	1541	2413	2530	1392	1420	1801.88
1097	unknown1444	0.0579045	0.0920774	18	6	217.082	0.436695	0.652705	20	6	1565.5	0.118278	0.181086	19	6.01667	1407.28	113.691	0.0807883	1331	1416	1438	1580	1321	1440	1668	1833	811	830	1166	1129	1723	2080	1231	1299	1393.5
1100	unknown1447	0.105571	0.149581	18	6	687.308	0.83757	1	20	5.99998	7565	0.302903	0.411667	19	6.01666	6812.95	606.648	0.0890434	6370	6479	6942	7679	6734	6961	8648	7917	4997	4858	6343	6136	8408	9121	5214	5024	6739.44
1139	unknown1482	0.587657	0.676024	24	3	457.498	0.322121	0.522195	20.2759	6	3520.5	0.504369	0.635784	22.1379	4.65913	3199.24	339.98	0.106269	3508	3012	3726	3618	3272	3557	3626	3627	2183	2504	3009	2955	3628	3729	2386	2691	3189.44
1163	unknown1503	0.0579045	0.0920774	18	6	2678.87	0.040454	0.167576	20	6	7880.25	0.0165297	0.0350852	19	6.01667	3612.91	4356.95	1.20594	1248	1411	1525	1766	4950	7362	7737	11472	1095	1238	1643	1805	1651	1371	1436	1649	3084.94
1178	unknown1517	0.0787266	0.117791	18	6	637.103	0.516719	0.738414	20	5.99998	3391	0.170937	0.249127	19	6.01666	2770.49	597.694	0.215736	2353	2276	2925	2627	3214	3489	3705	3156	1883	1942	2502	2450	2749	3967	1946	1985	2698.06
1192	unknown153	0.105571	0.149581	24	3	314.309	0.413878	0.627264	20	6.63e-05	1044	0.180478	0.261799	22	1.37504	854.598	569.64	0.666559	1264	951	1143	818	770	1122	1351	866	304	339	403	325	1141	2035	833	493	884.875
1194	unknown1531	0.719948	0.813936	18	15	297.869	0.842796	1	20	17.9999	3333	0.909915	1	19	16.4666	3156.77	249.681	0.0790938	3878	3509	2780	2990	2876	2897	2986	2659	3846	3542	3079	2821	3579	2937	3405	3411	3199.69
1195	unknown1532	0.182589	0.239506	18	6	676.701	0.0898622	0.227946	20	6	3832	0.083844	0.135212	19	6.01667	3143.46	714.556	0.227315	3118	2916	2479	2546	3615	4145	3875	3693	3050	3209	2647	2387	3223	2812	2734	2461	3056.88
1233	unknown1567	0.873774	0.972608	24	15	2392.85	0.825271	1	28	12	45248	0.956884	1	26	13.6964	43337.9	2053.03	0.0473727	41325	44732	37157	36774	41762	43967	47400	40806	44752	49409	46836	39995	50032	41505	47087	41118	43416.1
1236	unknown157	0.235786	0.2987	24	21	555.079	0.789681	1	25.4179	17.9999	3328.74	0.499183	0.629797	24.7089	19.5591	2444.27	785.342	0.321299	2894	2680	2879	1741	1471	1744	2583	1561	1921	1887	2204	1861	3955	5763	2027	1570	2421.31
1260	unknown1591	0.0787266	0.117791	18	3	79.9031	0.437648	0.653762	24.0327	17.9999	1425.25	0.150501	0.223404	21.0163	20.1299	1176.96	247.738	0.21049	1215	1202	1402	1664	774	875	1218	1198	837	983	1126	1174	1573	1782	1475	871	1210.56
1270	unknown160	0.380147	0.45889	18	9	1230.54	0.983439	1	20	6	6936	0.741683	0.889061	19	7.6	5690.46	1108.79	0.194851	5375	4558	3816	3002	6622	7461	8314	5347	6019	6277	4817	3713	8433	7128	3530	3148	5472.5
1275	unknown1604	0.182589	0.239506	18	6	823.779	0.678748	0.90319	20	6.00001	7492.25	0.382704	0.502307	19	6.01667	6845.25	514.719	0.0751936	6863	7053	7339	6192	5676	7129	8826	8338	4851	5892	5950	5067	8081	8857	5821	6591	6782.88
1281	unknown161	0.0921486	0.137493	18	0	463.155	0.618198	0.842555	24.2975	17.9999	2308.75	0.220191	0.310968	21.1488	18.408	2029.37	565.476	0.278646	3407	2930	2460	1904	1196	1789	1656	1589	1973	2160	1698	1597	3583	2460	1687	1505	2099.62
1282	unknown1610	0.235786	0.2987	24	6	320.673	0.268448	0.459196	20	6.00001	7155	0.23799	0.332848	22	6.05	6530.1	554.761	0.0849544	6416	6424	6290	6270	6575	6872	7433	7740	6568	6836	5753	5746	6680	6395	5970	5963	6495.69
1325	unknown165	0.235786	0.2987	24	9	818.123	0.794452	1	20	6	4817.25	0.501071	0.631994	22	7.425	3901.75	822.213	0.210729	4255	3163	3048	2391	4725	5437	5284	3823	4359	4781	3493	2767	5518	3550	2376	2354	3832.75
1333	unknown1657	0.475047	0.559107	24	0	456.614	0.729822	0.950069	20.1831	6.02e-05	3858.5	0.713958	0.861124	22.0915	3.29e-05	3448.91	515.881	0.149578	3656	3927	3928	3923	2299	3349	4168	4108	2893	2875	3230	2593	3916	4780	3328	2823	3487.25
1337	unknown1660	0.0787266	0.117791	18	6	1155.24	0.375042	0.583419	20	6.00001	9434.75	0.13353	0.201607	19	6.01667	7588.3	1819.54	0.239782	7002	5653	7472	7365	7577	8201	13036	8925	5892	7385	6260	6421	7488	7818	5202	6188	7367.81
1341	unknown1664	0.587657	0.676024	24	21	131.345	0.926881	1	20	17.9999	2896.75	0.875609	1	22	19.525	2802.89	104.064	0.0371276	2850	2796	2662	3185	2876	2704	2475	2465	2589	2725	2814	3272	2955	2916	2671	3045	2812.5
1369	unknown169	0.139706	0.189099	24	21	2435.98	0.647843	0.874426	23.52	17.9999	14368	0.307936	0.417067	23.76	19.4868	12448	3191.65	0.256397	19507	17825	12637	9149	8366	10156	10907	9188	11376	12856	10604	9656	20694	14817	10910	11051	12481.2
1381	unknown170	1	1	24	0	1162.84	0.907789	1	26.0177	17.9999	8989.98	0.995611	1	25.0088	21.1554	6799.67	1690.01	0.248542	7796	7012	7304	4975	4462	5216	7471	4847	5405	5654	6076	5373	10850	15401	5283	4426	6721.94
1388	unknown1706	0.0787266	0.117791	24	21	497.803	0.490588	0.71221	23.7736	17.9999	5102	0.164296	0.241669	23.8868	19.4933	4584.24	593.264	0.129414	5378	5037	4585	4399	3994	3899	4317	3927	3684	4448	4319	4999	5530	6258	4344	4276	4587.12
1395	unknown1712	0.235786	0.2987	18	0	857.013	0.486825	0.709195	25.4179	17.9999	5977.75	0.363263	0.481165	21.7089	18.5412	5780.95	761.804	0.131778	6332	7187	7284	6277	5065	5308	5671	4745	4913	6283	5278	5448	7316	6472	4879	5244	5856.38
1396	unknown1713	0.182589	0.239506	24	9	287.262	0.410974	0.624202	20	6	4833.25	0.269372	0.37134	22	7.425	4353.32	343.383	0.0788785	4053	4676	4498	3606	5288	4955	4519	4571	3905	4548	4208	4189	4627	3783	3593	4173	4324.5
1416	unknown1731	1	1	24	0	3065.13	0.999999	1	24.0327	6.63e-05	26479.7	1	1	24.0163	3.31e-05	22773.1	5949.82	0.261266	62262	10733	24165	8759	16592	25584	21526	13182	7635	15270	40530	13266	10579	42753	6633	44849	22769.9
1425	unknown174	0.475047	0.559107	18	6	396.687	0.999903	1	20	5.99998	2300.75	0.82861	0.969476	19	6.01666	1988.79	338.685	0.170297	2081	1753	1834	1189	2078	2300	2803	2022	1464	1736	1599	1310	3041	3493	1446	1015	1947.75
1445	unknown1758	0.475047	0.559107	24	15	4492.25	0.75757	0.975402	20.2759	12	32577.5	0.727673	0.875716	22.1379	13.4691	27589.7	6001.36	0.217521	26661	32893	14387	25085	20371	29929	22106	23812	33739	28695	30872	37004	38041	19459	27869	28031	27434.6
1446	unknown1759	0.0787266	0.117791	18	3	243.598	0.548506	0.774382	20	6.36e-05	2625.25	0.178874	0.259646	19	1.58336	2484.73	310.765	0.12507	2892	2715	2399	2495	2385	2615	2734	2655	1846	2148	2316	2373	3196	3003	2447	2380	2537.44
1449	unknown1761	0.587657	0.676024	24	18	23071.5	0.665536	0.891085	20	12	179672	0.758268	0.904241	22	14.85	160975	51221.7	0.318196	177424	214812	94974	177273	99500	165428	97786	121006	194205	153651	173901	196929	236312	122984	182776	174264	161452
1450	unknown1762	0.873774	0.972608	24	18	5033.89	0.990666	1	21.4599	17.9999	51506.5	0.990537	1	22.7299	18.0563	47620.5	2893.42	0.0607599	49056	60302	26566	48882	38055	50952	41166	39188	52585	44204	50660	56487	66764	35770	51651	51841	47758.1
1454	unknown1766	0.182589	0.239506	18	6	359.21	0.98028	1	20	6.00002	3029.5	0.486926	0.616668	19	6.01667	2632.09	471.604	0.179175	1906	2546	2039	2273	2522	3262	2635	3699	2184	2135	2414	2676	2599	2243	3084	2982	2574.94
1455	unknown1767	0.301037	0.372426	18	0	8562.36	0.952531	1	20.6557	18	86465.5	0.644939	0.789312	19.3279	18.0853	75730.9	9968.64	0.131632	91318	104895	46310	91314	56425	81564	59947	60847	81798	63104	72510	88378	115190	59534	88237	82901	77767
1456	unknown1768	0.719948	0.813936	24	21	3399.24	0.985147	1	20.9501	17.9999	32567	0.952912	1	22.4751	19.4879	29681.4	2656.56	0.0895028	32226	37647	18293	35018	22883	30625	24795	25518	32759	25346	29067	33413	41818	23131	32529	32790	29866.1
1473	unknown1783	0.0579045	0.0920774	18	15	40424.9	0.0555932	0.183256	20	12	126097	0.0216924	0.0437893	19	13.6167	103295	41621.6	0.402938	113839	126714	88361	115060	51919	65341	47692	59033	117191	113290	124196	149711	153804	91429	109842	118852	102892
1506	unknown1812	0.105571	0.149581	18	6	3743.78	0.999528	1	28	6	23721	0.342821	0.458577	23	6.29762	21822.2	487.888	0.0223574	21310	20344	13469	18402	25507	21749	24009	23619	15537	17415	24368	14631	32218	22126	32385	21797	21805.4
1559	unknown1860	1	1	18	9	349.664	0.996968	1	28	17.9999	2920.75	0.999995	1	23	13.1428	2548.78	80.667	0.0316492	1770	2677	1725	2133	2570	1864	2365	3008	1835	2847	3391	2887	1927	2556	5272	1928	2547.19
1619	unknown1914	1	1	18	3	1058.36	1	1	26.6465	6.63e-05	8398.75	1	1	22.3233	1.8603	8431.72	1615.42	0.191588	15564	4957	8310	4764	7880	9313	9102	5116	4201	5959	13768	6297	5333	15885	3596	15721	8485.38
1626	unknown1920	1	1	24	0	3979.95	1	1	24.1644	17.9999	44809.7	1	1	24.0822	21.0105	38660.6	7048.58	0.18232	96059	17109	41514	14918	32652	42290	36241	22711	12164	28700	71259	23285	17474	73817	10742	77206	38633.8
1628	unknown1922	1	1	24	0	983.232	0.999991	1	23.0287	17.9999	7258.99	1	1	23.5144	20.9469	5958.62	1157.13	0.194194	12101	2547	8373	2526	3719	4991	5247	4048	1591	5341	11637	4598	2371	13000	1588	12077	5984.69
1656	unknown1948	0.719948	0.813936	24	21	272.413	0.711054	0.933554	25.2722	6.63e-05	1150	0.854696	0.99502	24.6361	23.0964	1083.45	373.655	0.344875	1417	1307	1157	719	673	849	1164	742	883	826	789	799	1735	2351	1055	712	1073.62
1658	unknown195	1	1	18	9	2011.01	0.978287	1	28	12	16708.2	0.999763	1	23	10.6786	15788.8	1137.11	0.0720199	15237	15870	12791	8875	15418	16034	15807	18694	19527	19058	14084	14164	22181	18320	13439	12362	15741.3
1669	unknown196	0.235786	0.2987	18	9	254.912	0.673795	0.898279	25.2722	6	1763.5	0.451142	0.578113	21.6361	7.97739	1587.24	229.339	0.144489	1471	1550	1144	983	1867	1789	1711	1687	1610	1968	1842	1321	1856	1740	1375	1096	1563.12
1675	unknown1965	0.105571	0.149581	24	21	2287.49	0.589629	0.816668	23.7736	17.9999	10189	0.235086	0.329106	23.8868	19.4933	8497.92	2557.83	0.300994	14217	12754	8540	5373	5192	6766	7720	6113	7760	8181	6625	6169	14411	10087	9532	6726	8510.38
1677	unknown1967	0.873774	0.972608	24	21	889.54	0.909825	1	26.0177	6.63e-05	4678.75	0.977379	1	25.0088	23.4458	4696.37	1401.93	0.298514	5573	5283	4666	3193	3139	3631	5300	3397	4085	3449	4008	3399	7775	10486	4167	2676	4639.19
1678	unknown1968	0.475047	0.559107	18	6	346.306	0.999943	1	20	5.99998	2539.25	0.828624	0.969476	19	6.01666	2269.76	289.423	0.127513	2551	2137	2159	1301	2429	2375	3173	2180	1838	1936	1848	1696	3332	3605	1746	1449	2234.69
1687	unknown1976	1	1	18	9	135.588	0.999674	1	28	6	1745.5	1	1	23	8.21428	1641.33	103.393	0.0629935	1708	1643	1161	1146	1847	1644	1831	1660	1545	1882	1716	1512	2423	1835	1542	1091	1636.62
1695	unknown1983	0.139706	0.189099	18	6	1066.14	0.621229	0.845621	20	6	9491.75	0.298927	0.406645	19	6.01667	8935.32	286.339	0.0320457	8248	10096	9205	9850	10222	9879	6232	11634	4570	7375	8364	6913	11408	10142	7988	10284	8900.62
1709	unknown1996	0.719948	0.813936	18	6	418.254	0.850401	1	20	6.00001	3971.25	0.912626	1	19	6.01667	3498.41	442.806	0.126573	3908	3816	2858	2933	3284	3982	4780	3839	3298	3564	2998	2569	4147	3562	3172	2406	3444.75
1710	unknown1997	0.719948	0.813936	18	3	271.175	0.999092	1	20	5.99997	2300.75	0.956291	1	19	4.43332	2243.07	376.139	0.167689	2484	2247	2263	1750	2171	2109	3009	1914	1862	1723	1889	1789	3204	3913	1884	1598	2238.06
1743	unknown2025	0.719948	0.813936	18	9	570.282	0.88274	1	20	6	2414.5	0.923612	1	19	7.6	1731.02	563.516	0.325539	1292	1378	976	677	2903	3210	2828	717	1974	1789	1113	829	2330	1876	1228	804	1620.25
1787	unknown2065	0.105571	0.149581	24	0	832.618	0.429197	0.643721	24.0327	6.63e-05	4539.99	0.185511	0.267755	24.0163	3.31e-05	3610.45	1419.01	0.393029	5799	5561	3652	3148	2874	2803	3207	2601	2900	2512	2669	2656	6094	5557	3724	1998	3609.69
1788	unknown2066	1	1	18	3	200.642	0.995051	1	20	6	3315	0.999988	1	19	4.43333	3185.41	190.546	0.0598184	3198	2965	3426	3487	2966	3160	3541	3593	2694	2795	3277	3127	3269	3470	2321	3637	3182.88
1792	unknown207	0.182589	0.239506	24	0	954.771	0.60586	0.831158	21.995	4.3e-05	9147.75	0.354174	0.472159	22.9975	2.25e-05	8201.89	1141.69	0.139199	10204	10525	9338	6524	8027	8547	8256	7823	7136	7800	6942	6410	9799	9766	7670	7125	8243.25
1803	unknown208	0.301037	0.372426	18	6	857.367	0.842069	1	20	6	3859.75	0.601393	0.743584	19	6.01667	3103.75	801.49	0.258233	3206	3028	2229	1896	3215	4121	4433	3670	2472	3253	2352	1959	4010	3993	2124	2145	3006.62
1814	unknown209	1	1	18	3	267.64	0.999606	1	28	6	3022.25	1	1	23	4.38095	3025.67	250.34	0.0827386	3157	2692	3123	2049	2732	2927	3828	2602	2250	2505	2808	2401	4701	6139	2562	1878	3022.12
1836	unknown2109	0.235786	0.2987	18	0	642.407	0.706805	0.930232	24.0327	6.63e-05	3046	0.465272	0.59363	21.0163	2.9e-05	2524.78	544.157	0.215526	3048	3642	2423	3071	1491	3419	2176	1855	2753	1863	1899	2108	3990	2324	3309	2107	2592.38
1840	unknown2112	0.182589	0.239506	18	9	761.2	0.904822	1	25.5652	6.00004	3111	0.462678	0.591088	21.7826	8.00179	2654.68	621.27	0.234028	994	2249	1798	2179	3273	3392	3173	2606	1205	3059	3017	4525	4117	2068	1501	2335	2593.19
1841	unknown2113	0.139706	0.189099	18	9	1752.92	0.992028	1	20	6	8290.5	0.412482	0.535546	19	7.6	6861.04	1340.66	0.195401	3640	5576	4698	5918	7605	10052	9250	6255	3685	6619	6356	8876	11053	5377	4421	6179	6597.5
1843	unknown2115	0.139706	0.189099	18	9	674.757	0.80075	1	20	6.00001	2448.5	0.356912	0.474786	19	7.60001	1881.78	571.193	0.303538	737	1616	1025	1328	2297	2825	2560	2112	824	1850	1697	2717	2876	1304	1016	1528	1769.5
1881	unknown215	0.139706	0.189099	24	21	1539.19	0.903156	1	20.5594	17.9999	5726.74	0.387371	0.507509	22.2797	19.5004	4286.71	1795.24	0.418793	3285	4274	4902	10254	1334	1798	1988	4273	1664	2264	3588	8323	3204	4363	4671	10669	4428.38
1896	unknown2163	1	1	18	3	1233.55	0.978332	1	20	6.32e-05	44319.7	0.999764	1	19	1.58336	43290	1113.47	0.0257212	46264	43852	44723	42440	42628	41372	46860	45798	37688	42791	42612	44279	46159	44080	39982	44134	43478.9
1904	unknown2170	0.182589	0.239506	24	3	527.855	0.347446	0.553103	20	5.99998	4206.5	0.238385	0.333293	22	4.67499	3811.86	463.659	0.121636	4397	4433	3811	3413	4344	4189	4547	3746	2752	3592	3347	3125	4725	3557	3293	3491	3797.62
1907	unknown2173	1	1	18	9	211.425	0.997105	1	22.1053	12	2760	0.999996	1	20.0526	10.456	1900.12	548.057	0.288434	668	1437	1682	425	2388	1334	996	1255	1315	695	8020	1010	776	3544	1357	2087	1811.81
1912	unknown2178	0.301037	0.372426	18	15	835.8	0.699294	0.92355	20	12	4900.75	0.538537	0.674144	19	13.6167	4022.38	1200.48	0.298451	3657	4775	3187	4524	1679	2712	3593	3885	3307	5169	4131	6996	4421	2892	4441	4803	4010.75
1913	unknown2179	0.873774	0.972608	18	15	182.787	0.80147	1	20	12	1085.5	0.949781	1	19	13.6167	887.763	259.476	0.292281	700	997	684	1127	399	522	829	904	693	1063	946	1640	1015	757	870	1018	885.25
1915	unknown2180	0.182589	0.239506	18	15	5014.8	0.194471	0.36437	20	12	26593	0.154034	0.228024	19	13.6167	23779.7	5824.5	0.244936	25140	27346	24571	26242	13327	16651	19104	20300	21643	26676	25731	32322	27004	20132	25350	28034	23723.3
1916	unknown2181	0.0579045	0.0920774	18	15	3153.52	0.357399	0.564176	20	12	19179.5	0.100947	0.158198	19	13.6167	17157.6	3876.55	0.225938	17082	19582	17961	19091	9931	12354	15198	15097	15342	19804	18119	23453	18916	14770	17022	20199	17120.1
1917	unknown2182	1	1	18	12	141.598	0.999999	1	20	12	4311.5	1	1	19	12.0333	4095.13	250.289	0.0611188	3661	4185	4153	4257	4122	3959	3445	4450	3122	4292	4358	5474	3717	3361	3917	4576	4065.56
1918	unknown2183	0.235786	0.2987	18	9	147.255	0.847856	1	20	6	1805	0.521747	0.655781	19	7.6	1649.41	146.724	0.0889559	1377	1540	1616	1575	1841	1660	1801	1918	1190	1588	1649	2043	1590	1323	1502	1716	1620.56
1933	unknown2197	0.139706	0.189099	18	9	729.204	0.231606	0.412868	20	6	12005.5	0.143371	0.214215	19	7.6	10892.4	784.092	0.0719853	10483	10301	10040	10109	12224	11991	11510	12297	8766	11298	10476	10473	11398	9995	9893	10558	10738.2
1971	unknown2230	0.105571	0.149581	24	21	1988.38	0.46978	0.691886	20	17.9999	11477.7	0.198572	0.284142	22	19.525	10208.3	2007.84	0.196688	12192	14968	8383	13043	5855	9632	6187	8145	8515	9518	11319	12631	13307	8703	10242	13659	10393.7
1974	unknown2233	0.587657	0.676024	24	21	426.032	0.937906	1	24.1644	17.9999	4091.5	0.879507	1	24.0822	19.5053	3606.43	515.477	0.142933	4029	4813	2464	3855	2213	4276	2497	3559	3446	2871	3678	3607	5182	3261	3762	4161	3604.62
1975	unknown2234	0.0579045	0.0920774	24	21	1514.8	0.369045	0.577275	20	17.9999	8514.49	0.103552	0.16152	22	19.525	7141.61	1493.25	0.209091	8716	10146	5216	8611	4300	6394	4207	5638	5899	6660	8169	8458	10470	6331	7422	9835	7279.5
2013	unknown2269	0.139706	0.189099	18	0	8554.22	0.681628	0.905663	20	17.9999	68584.7	0.319154	0.43051	19	18.05	58719.6	10038.7	0.17096	75528	84470	38171	72322	38531	61091	40849	45307	67124	52223	57571	66886	86619	49286	71488	66946	60900.8
2016	unknown2271	0.139706	0.189099	18	0	518.663	0.66281	0.888535	24.2975	17.9999	3963.75	0.312936	0.423309	21.1488	18.408	3635.51	611.671	0.168249	4489	5583	2818	4377	2845	3284	3153	3301	3678	2952	3337	3712	4663	3072	4086	4034	3711.5
2026	unknown2280	0.301037	0.372426	24	18	18630.5	0.345807	0.551509	20	17.9999	105466	0.339618	0.455137	22	18.15	88211.6	21870.6	0.247934	100884	129257	56580	102570	41867	83986	42176	61779	114853	83685	93313	106737	137202	72957	111794	99910	89971.9
2028	unknown2282	0.235786	0.2987	18	15	1738.42	0.443637	0.65944	20	12	7521.25	0.340754	0.456207	19	13.6167	6854.12	1612.81	0.235305	7598	9986	5141	7495	4417	5799	4647	4935	8231	6910	6891	8053	8969	5364	7451	7529	6838.5
2040	unknown2293	0.873774	0.972608	24	15	246.957	0.984703	1	21.6708	12	2958.75	0.989769	1	22.8354	13.4585	2667.27	349.426	0.131005	2705	3101	1666	2278	2338	3127	2489	2339	3105	2626	2920	3184	3558	2063	2691	2384	2660.88
2082	unknown2330	1	1	24	0	251.553	1	1	26.3284	6.63e-05	7705	1	1	25.1642	3.17e-05	7730.71	424.906	0.0549634	8169	8812	5397	8442	6679	8787	6550	8555	8322	6902	7500	7052	9657	6753	8677	7211	7716.56
2089	unknown2337	0.380147	0.45889	24	3	379.363	0.846487	1	23.52	6.06e-05	3137.25	0.686653	0.832132	23.76	1.48503	2647.99	598.745	0.226113	2489	3235	2746	4079	1725	3099	2825	3340	1213	1676	2480	3180	3094	2701	2560	1969	2650.69
2093	unknown2340	0.235786	0.2987	18	6	453.963	0.608051	0.83292	20	6	2075.5	0.421842	0.545409	19	6.01667	1642.4	463.375	0.282133	1052	1672	1295	1371	2312	1763	2157	2070	728	1301	1636	1900	1265	1974	1668	1216	1586.25
2094	unknown2341	0.182589	0.239506	18	9	386.434	0.654447	0.880595	20	6.00001	2771.5	0.373359	0.492129	19	7.60001	2319.92	382.708	0.164966	1560	2706	1846	1822	2847	2679	2439	3121	1299	2276	2465	2588	1885	2582	2126	1674	2244.69
2190	unknown2428	0.139706	0.189099	18	6	591.495	0.999452	1	20	6.00001	3326.5	0.414527	0.537136	19	6.01667	2856.6	518.142	0.181384	2876	2557	2573	1635	3017	3251	4082	2956	2150	2163	2197	2015	4172	4983	2193	1881	2793.81
2195	unknown2432	0.122638	0.173367	24	6	4528.31	0.292289	0.487714	21.253	6	24860	0.15516	0.229454	22.6265	6.02219	20005.3	3381.62	0.169037	21235	14552	31116	17750	21235	26225	27944	24036	14831	15756	16381	20605	17849	15836	14814	17573	19858.6
2221	unknown2456	0.139706	0.189099	24	3	445.3	0.321982	0.522195	22.6735	6	2058	0.184496	0.266645	23.3368	4.5463	1714.86	310.875	0.181283	2593	2097	1927	1434	2610	2091	1624	1907	1136	1629	1179	1435	1562	861	1334	1963	1711.38
2224	unknown2459	0.139706	0.189099	18	15	1324.94	0.0426677	0.168276	20	12	4947	0.0364961	0.0677069	19	13.6167	4321.32	1272.19	0.294397	4890	4744	3746	5020	2227	3135	2667	2962	4636	4448	5011	5693	5850	4444	4525	4946	4309
2248	unknown2480	0.0579045	0.0920774	24	18	2333.81	0.0873322	0.225222	20.0911	12	13227	0.0317929	0.0603521	22.0456	14.8508	10858	3612.06	0.332662	9381	11590	8758	10335	7732	10496	7203	8045	12477	12349	13473	14609	15233	10164	11284	11108	10889.8
2303	unknown253	0.139706	0.189099	18	0	1323	0.576827	0.803365	24.0327	17.9999	2548.49	0.283537	0.388149	21.0163	18.3786	1630.3	1018.13	0.624508	1061	2677	2444	3755	248	360	422	2757	398	521	786	2583	2134	1640	1902	4518	1762.88
2329	unknown2553	0.139706	0.189099	24	6	1609.55	0.356591	0.563108	20	6.00001	6547.25	0.199241	0.284912	22	6.05	4590.88	1739.11	0.378818	2602	3746	4436	6051	5873	5749	6420	8147	1853	2790	3512	6811	2560	2785	3029	5364	4483
2330	unknown2554	1	1	24	6	978.282	0.990629	1	21.1511	6	5672.75	0.999956	1	22.5755	6.02398	4809.91	565.741	0.11762	3142	4660	5401	7033	5129	4730	5389	7443	2121	3166	3981	7493	3292	3286	3996	6290	4784.5
2332	unknown2556	0.873774	0.972608	24	6	710.642	0.978304	1	20.9501	6	3963	0.98891	1	22.4751	6.02775	3249.21	566.327	0.174297	1985	2867	3390	4962	3420	3555	3870	5007	1393	2116	2740	5314	2215	2193	2540	3986	3222.06
2377	unknown2597	0.105571	0.149581	18	6	342.24	0.109413	0.254546	20	6.00001	7946.75	0.0630787	0.106111	19	6.01667	7506.01	329.67	0.0439208	7708	7781	7755	7335	7721	7772	8508	7786	7070	6298	6823	7356	7813	7285	7325	7121	7466.06
2378	unknown2598	0.587657	0.676024	24	3	7006.37	0.470411	0.692581	20	6	198209	0.631877	0.776618	22	4.675	190814	9030.93	0.0473284	192947	201232	190437	196602	187832	198202	217114	189689	168103	160818	177577	198805	195810	191732	200042	181648	190537
2407	unknown2623	0.105571	0.149581	18	6	929.492	0.512677	0.734334	20	5.99999	5752.5	0.211974	0.300737	19	6.01666	4858.83	968.24	0.199274	3645	4686	4084	4442	6179	5992	5139	5700	3171	4312	4691	5346	4751	3734	4527	5465	4741.5
2440	unknown2653	0.301037	0.372426	24	0	1441.79	0.630734	0.855332	24.0327	6.63e-05	9925.24	0.50533	0.63681	24.0163	3.31e-05	8756.24	1624.48	0.185522	9976	9733	10284	9708	7149	6978	9991	8282	6004	7516	8085	8685	10161	12480	8422	6632	8755.38
2441	unknown2654	0.139706	0.189099	24	0	775.696	0.51515	0.736658	23.0287	6.63e-05	3521.5	0.261359	0.361214	23.5144	3.39e-05	2924.64	949.207	0.324555	3936	3987	3198	2965	2120	2234	3474	2820	1738	2127	2173	2612	3999	4988	2751	1926	2940.5
2442	unknown2655	0.873774	0.972608	18	3	447.245	0.920645	1	20.0911	5.7e-05	4146	0.979492	1	19.0456	1.58716	3724.57	480.15	0.128914	4144	4039	4314	4087	3378	3226	4616	3909	2498	3261	3470	3822	4455	5454	3246	2960	3804.94
2443	unknown2656	0.235786	0.2987	24	0	23945.6	0.661604	0.887468	22.1053	7.55e-05	177883	0.445827	0.572319	23.0526	3.94e-05	156645	26482.8	0.169062	182518	177616	181537	169860	140669	130887	189007	157607	105721	128347	139067	152084	182087	223282	141401	119064	157547
2445	unknown2658	0.105571	0.149581	18	3	286.555	0.801319	1	26.3284	17.9999	7446.98	0.293536	0.400193	22.1642	20.5056	4661.06	1691.9	0.362987	3419	7319	2847	5026	2945	3415	3462	3664	7253	2289	2171	3279	7309	3923	13811	4745	4804.81
2446	unknown2659	0.105571	0.149581	24	0	1089.12	0.386648	0.597497	24.9858	6.63e-05	6920.99	0.171382	0.249692	24.4929	3.25e-05	5868.75	1113.43	0.189722	6488	7000	7409	6787	4416	4676	7363	5522	4436	5285	4892	5358	6327	7276	5947	4446	5851.75
2447	unknown266	0.139706	0.189099	24	21	1175.74	0.601398	0.827668	22.2166	18	7230.99	0.29211	0.398778	23.1083	19.4711	5749.9	1385.27	0.240921	7878	5523	5243	6200	989	4937	5773	4383	5268	2187	8432	7142	7426	7419	6888	7191	5804.94
2449	unknown2661	0.301037	0.372426	24	0	457.852	0.705366	0.930036	20.464	6.63e-05	4513.25	0.541377	0.677504	22.232	3.6e-05	4046.73	532.418	0.131567	4613	4461	4906	4073	3867	3456	5054	4262	2694	3644	3543	3810	4592	5465	3725	3163	4083
2452	unknown2664	0.105571	0.149581	18	6	269.408	0.200571	0.372943	20	6	1963.75	0.102801	0.160522	19	6.01667	1744.17	137.054	0.0785786	2019	1740	1918	1823	1978	1829	2289	1759	1220	1074	1237	1373	2086	2403	1565	1328	1727.56
2456	unknown2668	0.475047	0.559107	18	3	118263	0.573919	0.800087	20	6.63e-05	934175	0.626962	0.771454	19	1.58336	839560	105254	0.125368	968388	928023	938975	901314	778406	848572	1000109	912026	610332	734889	741820	800160	1050704	1086409	732667	685778	857411
2457	unknown2669	0.380147	0.45889	18	3	3587.15	0.542669	0.768648	20	6.63e-05	28805.7	0.53192	0.667211	19	1.58336	25944.5	3162.83	0.121908	28777	28934	29215	28297	24445	26196	31074	28647	18639	22958	23118	24325	32172	33313	22307	21277	26480.9
2459	unknown2670	0.301037	0.372426	24	3	317.668	0.685743	0.909423	20	6.63e-05	4209	0.53214	0.667294	22	1.37504	3950.18	552.834	0.139952	4391	3948	4585	3912	3933	3763	4591	4388	2711	3586	3521	3854	4485	5035	3628	3342	3979.56
2460	unknown2671	0.301037	0.372426	18	3	571.166	0.584057	0.810566	20	6.63e-05	5304.5	0.481452	0.611525	19	1.58336	4801.36	611.839	0.12743	5518	5200	5485	5015	4454	4771	5752	5054	3393	4163	4335	4720	5863	6267	4341	4151	4905.12
2461	unknown2672	0.380147	0.45889	18	3	2807.21	0.610135	0.834356	20	4.56e-05	22744.7	0.57087	0.710103	19	1.58336	20789.7	2732.64	0.131442	23368	22406	23789	21416	19636	21409	24847	23090	14755	17576	18299	20075	26473	27327	18587	16997	21253.1
2463	unknown2674	0.380147	0.45889	18	3	589.727	0.675511	0.900163	20	6.63e-05	4991.5	0.6059	0.748599	19	1.58336	4506.48	627.349	0.13921	4971	4676	5368	4951	4107	4593	5349	4784	3088	3960	4127	4231	5682	6172	4086	3661	4612.88
2464	unknown2675	0.380147	0.45889	24	0	878.934	0.756213	0.974373	24.8451	6.63e-05	7280.49	0.645844	0.789738	24.4225	3.26e-05	6350.36	1031.5	0.162432	7480	7446	6361	7835	4686	6327	6641	6220	4376	5625	6422	5828	8137	8079	5193	4732	6336.75
2465	unknown2676	0.475047	0.559107	18	6	214.96	0.71312	0.9357	20	6	4371.25	0.705462	0.851826	19	6.01667	4170.65	109.545	0.0262658	4405	4440	4401	4082	4053	4106	4722	4604	3093	3614	3790	3966	4832	5238	3632	3540	4157.38
2466	unknown2677	0.587657	0.676024	24	0	401.637	0.599443	0.826621	20	6.63e-05	4028.25	0.719811	0.867227	22	3.65e-05	3676.17	463.406	0.126057	4622	3902	3846	3743	3308	4001	4061	3916	2897	2839	3164	3522	4733	4550	3472	2824	3712.5
2469	unknown268	0.0787266	0.117791	24	18	4006.47	0.215828	0.392859	20	17.9999	18723.2	0.0862321	0.138445	22	18.15	15562.3	3046.34	0.195751	20093	14170	13077	15576	2413	12150	15316	11270	13091	19725	22187	18959	19089	19144	17657	19003	15807.5
2470	unknown2680	0.587657	0.676024	24	0	1019.12	0.854206	1	24.7059	17.9999	10925.2	0.847942	0.989114	24.3529	21.0479	10586.9	979.365	0.0925075	10974	11621	10705	13024	8240	9750	11430	9754	8950	9531	10787	10668	12180	12919	9670	8932	10570.9
2472	unknown2682	0.301037	0.372426	24	0	307.238	0.724806	0.945873	24.7059	6.63e-05	4020.75	0.550365	0.687758	24.3529	3.27e-05	3689.64	378.563	0.102602	3703	3824	4232	4324	2951	3645	4117	3355	3498	3195	3337	3648	4435	4005	3367	3331	3685.44
2519	unknown2724	0.0579045	0.0920774	18	0	21787.7	0.190923	0.359902	24.2975	17.9999	129046	0.0608577	0.102975	21.1488	18.408	116810	20778.4	0.177883	142496	141220	140700	132916	97262	90822	113305	104203	94578	104131	114090	118351	147287	154790	113825	100281	119391
2555	unknown2757	1	1	18	6	128.34	0.983805	1	20	6	2821.5	0.999868	1	19	6.01667	2696.65	130.188	0.0482778	2578	2502	2687	2716	2575	2913	2982	2816	2537	2470	2739	2682	2880	2925	2393	2499	2680.88
2557	unknown2759	0.0579045	0.0920774	24	0	910.046	0.262552	0.452027	24.2975	6.63e-05	6198.74	0.0788465	0.128351	24.1488	3.3e-05	5345.81	1056.19	0.197573	6104	6463	6826	5402	4555	5232	5198	4715	3925	4171	5088	5068	6541	6821	4501	4842	5340.75
2560	unknown2761	0.182589	0.239506	24	0	550.129	0.412031	0.625339	24.4321	6.63e-05	4769	0.269871	0.37191	24.2161	3.29e-05	4252.56	641.976	0.150962	4666	5086	5154	4170	3741	3780	4108	4018	3420	3399	4066	4419	4893	5386	3676	3988	4248.12
2563	unknown2764	1	1	24	0	75.3069	0.999992	1	24.2975	6.63e-05	3890	1	1	24.1488	3.3e-05	3819.51	92.5845	0.0242399	3809	3750	3960	4041	3407	3909	4030	3712	3594	3635	3863	3955	4087	4240	3633	3480	3819.06
2565	unknown2766	0.182589	0.239506	18	0	237.058	0.591911	0.818842	20	17.9999	4564	0.348537	0.465361	19	18.05	4360.43	256.033	0.0587174	4471	4663	4523	4889	3510	4136	4560	4074	4275	4227	4565	4508	4696	4950	4518	4092	4416.06
2595	unknown2793	0.301037	0.372426	18	6	336.583	0.610179	0.834356	20	6	2453	0.494948	0.625364	19	6.01667	2267.77	116.704	0.0514619	2043	2237	2348	2762	2226	2697	2251	2638	1318	1564	1617	2153	2917	3359	1986	1942	2253.62
2600	unknown2798	0.0787266	0.117791	18	0	426.032	0.160797	0.319892	24.8451	6.63e-05	2800.75	0.067971	0.113099	21.4225	2.86e-05	2347.37	364.468	0.155266	2873	2970	2690	2670	2050	1953	2408	2149	1775	2176	2086	2341	2733	3006	2231	2059	2385.62
2604	unknown2800	0.0579045	0.0920774	24	0	8236.2	0.180229	0.345918	24.9858	6.63e-05	60030.4	0.0580504	0.0991161	24.4929	3.25e-05	51746.7	8882.47	0.171653	61846	63290	60037	54949	44127	45054	51730	47232	40243	46571	45190	50899	58546	64079	47843	44141	51611.1
2605	unknown2801	0.0787266	0.117791	18	0	676.701	0.313326	0.511191	24.9858	6.63e-05	4804.24	0.115992	0.178164	21.4929	2.85e-05	4121.76	538.472	0.130641	4892	4923	4738	4664	3475	3705	4143	3937	3271	3769	3712	4232	4610	5417	3988	3348	4176.5
2626	unknown2820	0.301037	0.372426	18	6	335.876	0.532678	0.757968	20	5.99998	2755	0.453865	0.581087	19	6.01666	2522.87	135.606	0.0537508	2572	2899	2567	2675	2620	2326	3169	2905	1425	1811	2147	2131	3381	3470	1982	2023	2506.44
2672	unknown2862	0.139706	0.189099	18	6	290.091	0.166357	0.326751	20	5.99999	2358	0.11067	0.171143	19	6.01666	2109.14	151.219	0.071697	2255	2493	2285	2104	2173	2323	2538	2398	1438	1573	1625	1762	2590	2567	1681	1648	2090.81
2709	unknown2896	0.587657	0.676024	24	0	252.791	0.927371	1	22.9091	6.63e-05	3129.75	0.875784	1	23.4545	3.39e-05	2937.98	341.878	0.116365	3113	3791	2759	2856	3040	2578	3058	2683	2400	2780	2498	2995	3415	3779	3007	2359	2944.44
2713	unknown29	0.475047	0.559107	18	9	4418.71	0.823269	1	20	6.00001	17746.5	0.758254	0.904241	19	7.60001	12857.3	4079.93	0.317325	5613	4105	5963	20674	20820	18180	16483	15503	5170	9196	12936	16521	18212	10945	3856	8707	12055.2
2716	unknown2901	1	1	18	6	1370.37	0.999991	1	20	6	101242	1	1	19	6.01666	100821	208.768	0.00207068	97739	115206	100469	89967	103742	101870	99895	99459	84042	104498	97154	103267	110251	105972	102402	96800	100796
2718	unknown2903	0.301037	0.372426	24	18	598.036	0.678324	0.903181	20	17.9999	7291.5	0.528605	0.663964	22	18.15	6786.34	584.388	0.0861125	7193	8064	6533	6312	6410	5492	6192	6046	5629	7473	7256	7568	8443	6245	7475	7003	6833.38
2742	unknown2925	0.873774	0.972608	18	6	2160.21	0.999997	1	20	5.99997	35167	0.991675	1	19	6.01665	33807.8	1520.94	0.0449879	35607	34030	31974	27951	39803	37222	32774	30869	33743	34603	30809	26471	41597	35711	32633	32179	33623.5
2746	unknown2929	0.0579045	0.0920774	18	0	609.88	0.667893	0.892861	20	17.9999	4242	0.164465	0.241738	19	18.05	3976.42	475.556	0.119594	4117	4742	4931	4642	2788	3165	3796	4323	3105	3870	4000	4829	4266	4621	3961	4120	4079.75
2755	unknown2937	0.139706	0.189099	24	0	702.157	0.669512	0.894198	25.2722	6.63e-05	10162.2	0.315159	0.425651	24.6361	3.23e-05	9357.98	798.559	0.0853345	10020	10822	9627	10180	8369	9631	8792	9716	7705	8283	8251	10581	9840	8578	8748	10337	9342.5
2759	unknown2940	0.587657	0.676024	24	3	222.739	0.808266	1	20.5594	6.63e-05	3343.75	0.828597	0.969476	22.2797	1.39252	3151.79	274.318	0.0870355	3099	3559	3200	3517	3001	3163	3405	3582	2489	2896	2829	3263	3353	3771	2710	2783	3163.75
2767	unknown2948	0.587657	0.676024	18	0	503.106	0.984336	1	20	17.9999	5182	0.895097	1	19	18.05	4971.68	411.082	0.0826847	4413	5707	6027	5909	3558	3873	4667	5595	3720	4809	5549	6421	4879	4761	5569	5519	5061
2777	unknown2957	0.340592	0.42076	18	6	829.083	0.501109	0.722064	20	6	7111	0.472426	0.601471	19	6.01667	5984.17	1148.94	0.191997	5238	5881	5400	5090	8760	7183	5541	6960	4105	5453	5400	6036	6181	4558	5196	6537	5844.94
2782	unknown2961	0.475047	0.559107	18	6	355.321	0.672904	0.89762	20	6.00001	6808.5	0.684233	0.829895	19	6.01667	6399.55	311.427	0.0486639	6152	6903	6510	6417	6656	6298	6702	7578	4535	5872	5810	6748	7184	6289	6104	6031	6361.81
2797	unknown2975	0.0787266	0.117791	18	6	365.221	0.288242	0.483006	20	5.99998	2235.25	0.108599	0.168362	19	6.01666	1999.12	170.199	0.0851369	2248	2548	1919	1543	1984	2122	2512	2323	1422	1477	1526	1458	2411	2336	2136	1691	1978.5
2825	unknown30	0.475047	0.559107	18	9	1063.14	0.876648	1	20	6.00001	4110.25	0.781255	0.928839	19	7.60001	3000.24	914.652	0.30486	1277	999	1340	4977	4673	4369	3769	3630	1182	2175	3038	3802	4356	2621	871	2048	2820.44
2829	unknown3002	0.139706	0.189099	18	6	726.729	0.869441	1	20	6	5114.25	0.377532	0.49642	19	6.01667	4563.57	455.485	0.0998089	4512	4562	4521	4677	4507	4671	5546	5733	3142	3314	4182	4115	5189	6747	3384	3332	4508.38
2841	unknown3013	0.182589	0.239506	18	3	430.274	0.835444	1	26.1721	4.23e-05	6782.25	0.43937	0.5647	22.0861	1.84052	6699.11	1862.11	0.277964	7503	6245	8349	5032	5858	6716	6218	5756	4353	6464	5487	6178	7178	12751	5769	8523	6773.75
2917	unknown3082	0.301037	0.372426	18	3	307.415	0.874671	1	20	6	2909.5	0.614675	0.757842	19	4.43333	2838.88	385.696	0.135862	3038	2667	3051	2730	2878	2512	3292	2956	1876	2293	2460	2802	3774	3784	2819	2408	2833.75
2920	unknown3085	0.380147	0.45889	24	3	1768.47	0.753557	0.972259	24.4321	5.4e-05	16709	0.644583	0.789099	24.2161	1.51353	14202.3	2900.45	0.204224	13289	23598	13758	16191	12712	13110	16001	16584	10386	11262	11985	13495	16458	16859	10643	10738	14191.8
3012	unknown3168	0.475047	0.559107	18	6	386.964	0.999939	1	20	6.00001	4401.25	0.828623	0.969476	19	6.01667	4130.47	301.971	0.0731082	3553	4274	3502	4146	4351	4139	4682	4433	3069	3573	3944	4448	4373	5432	3728	3855	4093.88
3015	unknown3170	0.380147	0.45889	24	3	486.843	0.329861	0.531756	20	6e-05	2938.75	0.385752	0.505847	22	1.37503	2596.66	622.553	0.239751	2848	3115	3096	2696	2726	2658	3299	2798	1669	2046	2056	2134	3153	3729	2029	2024	2629.75
3063	unknown3213	0.182589	0.239506	18	6	501.692	0.964969	1	20	6.00002	4886.75	0.482094	0.612161	19	6.01667	4462.7	432.821	0.0969864	4513	4866	3514	3890	4560	5730	4920	4337	4043	4008	3830	3703	5137	5316	4373	3824	4410.25
3090	unknown3238	0.0579045	0.0920774	24	3	214.43	0.685423	0.909423	20	6.63e-05	1775.75	0.167753	0.245645	22	1.37504	1583.47	435.663	0.275132	1691	1902	2032	1478	1554	1470	1873	1721	842	1303	1249	1434	1794	2674	1376	1313	1606.62
3112	unknown3258	0.0787266	0.117791	24	6	479.065	0.279632	0.473825	20	6.00001	3684	0.106023	0.16484	22	6.05001	3064.93	454.362	0.148245	2638	3101	2972	3199	3472	3611	3842	3811	2112	2580	2742	2838	2865	4001	2272	2532	3036.75
3117	unknown3262	0.0787266	0.117791	18	6	1438.08	0.0535646	0.181341	20	6	4836.25	0.027278	0.0529658	19	6.01667	3344.15	1552.09	0.464122	2777	2813	2272	2086	4793	5432	4285	4835	2176	2579	2604	2646	3646	2596	2435	2522	3156.06
3160	unknown3300	0.380147	0.45889	24	21	754.306	0.751936	0.971036	23.6461	17.9999	7540.99	0.643812	0.788379	23.8231	19.4899	6985.28	782.029	0.111954	7452	8511	7790	6152	7843	6176	4979	6300	5291	6789	7242	7171	7482	6772	8083	7827	6991.25
3164	unknown3304	0.182589	0.239506	24	3	620.486	0.391445	0.603118	21.253	6.63e-05	5274.75	0.260051	0.359866	22.6265	1.41419	4636.75	894.936	0.19301	4924	5770	5365	5040	4528	4655	5026	5223	3038	3717	3952	4553	5784	5653	3771	3657	4666
3194	unknown3331	0.380147	0.45889	18	6	247.134	0.59172	0.818839	20	5.99998	3265.5	0.560534	0.699053	19	6.01666	3065.29	118.408	0.0386288	2840	3269	3369	3325	3128	2997	3527	3410	2084	2597	2865	2655	3694	3861	2692	2502	3050.94
3196	unknown3333	0.0579045	0.0920774	18	6	788.071	0.114551	0.260072	20	6	4777.75	0.0399022	0.0728093	19	6.01667	4316.78	280.333	0.0649404	4656	5721	4331	3660	4548	4941	4415	5207	2796	3090	3254	3143	5105	4248	4947	4463	4282.81
3244	unknown3377	1	1	24	18	128.34	0.916961	1	28	17.9999	2468.5	0.996453	1	26	18.1071	2120.51	101.394	0.0478159	2002	2123	1536	1897	2181	1490	2198	2092	1668	1946	2073	2762	2249	3311	2292	2022	2115.12
3253	unknown3385	0.475047	0.559107	18	0	324.385	0.790977	1	20	17.9999	2904	0.743547	0.890857	19	18.05	2716.44	311.813	0.114787	3548	3674	2474	2689	2180	1741	2790	2356	2268	3228	3239	2744	3454	2613	2807	2742	2784.19
3281	unknown341	0.0787266	0.117791	18	9	3726.28	0.0308024	0.161456	20	6	13194	0.017028	0.0358266	19	7.6	6392.37	4939.16	0.772665	3360	3631	2429	1602	8545	14736	15124	14371	3784	3636	2768	1126	4500	2383	2534	2214	5421.44
3353	unknown3475	0.301037	0.372426	18	9	358.15	0.824121	1	28	6	3686.75	0.59392	0.735815	23	8.21429	3537.8	185.157	0.0523369	3085	3439	2958	2900	4176	3121	3901	3549	3323	3873	3812	3470	4277	3530	3700	3356	3529.38
3376	unknown3496	0.105571	0.149581	24	3	677.762	0.774307	0.989888	20	6	8664	0.286445	0.392005	22	4.675	7969.41	891.031	0.111806	7654	8394	8708	7442	10408	7462	8104	8682	6494	7271	7338	7306	7362	9759	7144	7545	7942.06
3377	unknown3497	0.587657	0.676024	24	15	392.621	0.636449	0.861196	28	18	9294.75	0.741843	0.889061	26	16.4821	8899.26	200.032	0.0224774	7617	9323	8384	8122	8968	8412	8476	9578	8685	8914	9479	9319	9373	8927	9134	9745	8903.5
3385	unknown3503	0.380147	0.45889	24	0	293.803	0.887802	1	20	4.22e-05	3822.5	0.704084	0.8504	22	2.32e-05	3548.04	426.752	0.120278	3531	4726	3540	3493	3477	3244	3752	3528	2773	3100	3598	3119	4551	4622	3261	2989	3581.5
3386	unknown3504	0.301037	0.372426	18	9	582.302	0.678561	0.90319	20	6	6056.5	0.528718	0.663964	19	7.6	5304.51	666.158	0.125583	4358	5670	4214	4289	7208	5977	4965	6076	4129	4883	5788	5434	5593	4151	5113	4929	5173.56
3397	unknown3514	0.0579045	0.0920774	24	9	715.592	0.0145413	0.159709	20	6	9719.75	0.00680319	0.0169006	22	7.425	3988.25	3793.55	0.951181	1673	2200	1560	1205	9849	9676	10090	9264	1741	2195	1659	1262	1998	1415	1736	1195	3669.88
3403	unknown352	0.0579045	0.0920774	18	9	3114.45	0.255255	0.442988	20	6.00001	8152.25	0.0770719	0.126028	19	7.6	4601.24	3538.92	0.769124	1749	1985	980	658	514	10798	10354	10943	5082	5365	4099	1852	3195	1709	1661	1545	3905.56
3422	unknown3537	0.0787266	0.117791	24	3	1391.59	0.367009	0.575361	20	6	14250.5	0.131296	0.199001	22	4.675	13269.8	1067.12	0.0804174	14486	15144	14727	12008	16021	13578	13590	13813	9747	11334	11860	13106	14100	14857	11984	11438	13237.1
3429	unknown3543	0.235786	0.2987	24	21	2024.09	0.550466	0.776137	24.5682	6.63e-05	10242.2	0.394805	0.515844	24.2841	22.7664	9450.55	2149.6	0.227458	8990	9668	10243	12068	6500	6752	9879	9707	6807	7231	8462	9012	12422	14067	12505	6484	9424.81
3449	unknown3561	1	1	18	3	5766.81	0.952978	1	20	6	59569	0.998877	1	19	4.43333	52942.5	6846.66	0.129323	49609	55505	52859	59083	51833	63777	47921	74745	33588	46805	41440	68419	57927	48891	39939	53280	52851.3
3451	unknown3563	1	1	18	3	846.23	0.999999	1	20	6	13987.5	1	1	19	4.43333	13601.7	559.825	0.0411585	13327	15144	12829	13799	13770	14594	12872	14714	10475	12587	11499	17527	15435	13250	12258	13428	13594.2
3453	unknown3565	1	1	18	6	362.746	0.997459	1	20	6.00001	5691	0.999997	1	19	6.01667	5357.59	309.182	0.0577092	6085	5106	5440	4474	6193	5540	5312	5719	3879	6024	4694	5539	6072	5171	5008	4866	5320.12
3477	unknown3587	0.873774	0.972608	24	0	3529.17	0.910637	1	23.9024	17.9999	29934.5	0.977542	1	23.9512	20.9939	27507.7	3518.77	0.12792	34106	37110	24415	24696	23048	23222	23345	29451	22773	26119	28975	23252	38518	30952	29437	20831	27515.6
3493	unknown3600	0.0579045	0.0920774	24	0	10000.6	0.308269	0.505224	24.9858	6.63e-05	119059	0.0897103	0.143021	24.4929	3.25e-05	105848	14054.1	0.132777	124716	139048	108677	103797	98081	97690	95174	102576	98563	91472	94674	100542	122134	112364	110148	90471	105633
3494	unknown3601	0.235786	0.2987	18	0	650.538	0.990775	1	20	17.9999	7240.75	0.573305	0.712722	19	18.05	6916.3	463.74	0.0670502	7756	8595	7208	6261	6955	5953	6024	6533	6165	6059	6395	9406	7175	6626	7388	7774	7017.06
3495	unknown3602	1	1	18	15	375.297	1	1	28	12	6085.25	1	1	23	14.5119	5945.38	354.211	0.0595775	5721	7536	5999	5481	8732	5106	4485	5469	5454	6200	6104	6583	5333	4503	5681	6722	5944.31
3521	unknown3626	0.139706	0.189099	18	0	1120.06	0.601457	0.827668	20	17.9999	6807.75	0.29213	0.398778	19	18.05	5987.4	988.26	0.165057	7428	6178	7695	6807	4502	5264	5130	4762	4111	6800	6114	7212	8947	6619	4581	7084	6202.12
3522	unknown3627	0.873774	0.972608	24	21	4568.26	0.970754	1	24.0327	6.63e-05	114856	0.98785	1	24.0163	22.5154	111633	5110.25	0.0457771	112302	121864	115584	109673	111422	104022	104295	113932	91405	112878	110187	117567	123616	121285	102011	114033	111630
3540	unknown3643	0.139706	0.189099	18	9	1134.91	0.926927	1	26.8085	6.00001	8125.75	0.394203	0.515225	22.4043	8.10821	7057.56	1026.36	0.145426	4881	6123	5944	4906	11511	6484	7493	7015	5412	6879	7551	9010	6600	7270	7172	7486	6983.56
3543	unknown3646	1	1	18	6	440.528	0.999946	1	20	6	5371.5	1	1	19	6.01667	5142.41	242.68	0.0471919	5054	6056	4126	4439	6202	5221	4896	5167	3808	4238	5359	4729	5843	7253	5251	4166	5113
3555	unknown3657	1	1	24	0	270.292	0.999988	1	27.8233	5.99998	5147	1	1	25.9117	2.79387	5161.52	458.301	0.088792	4592	5472	4713	5549	5895	4835	4765	5093	4631	5017	5146	4651	5318	6965	5988	3996	5164.12
3590	unknown3689	0.475047	0.559107	18	15	1025.48	0.991164	1	20	12	9218	0.825502	0.969476	19	13.6167	8418.5	1239.51	0.147237	9442	9934	8597	6858	9500	7235	6305	6487	8497	11254	8901	8220	7745	7919	6745	10865	8406.5
3633	unknown396	0.380147	0.45889	24	21	310.066	0.779792	0.994875	24.1644	17.9999	2212.5	0.656879	0.799406	24.0822	19.5053	1723.87	444.901	0.258083	1416	1775	1609	2395	914	1236	1568	1261	1012	1495	1926	2100	2558	3563	1427	1302	1722.31
3637	unknown4	0.0579045	0.0920774	24	6	9594.38	0.0207582	0.159709	20	6	82353.5	0.00928392	0.0216685	22	6.05	50427.5	29286.5	0.580764	41676	38925	34151	37547	81556	90737	81245	75876	35696	39240	35728	31771	48644	35384	33684	35914	48610.9
3644	unknown405	0.0579045	0.0920774	24	21	1140.21	0.0511931	0.179456	20	17.9999	4455	0.0202199	0.0412849	22	19.525	3541.38	1137.71	0.321263	4006	4404	3867	5384	1029	1542	1800	2061	3084	3794	4716	4836	4071	4698	3646	5405	3646.44
3645	unknown406	1	1	18	12	247.487	0.729619	0.950069	20	12	1116.75	0.959619	1	19	12.0333	830.582	292.206	0.351809	622	489	710	979	577	545	685	885	556	1202	1090	1619	726	537	400	1115	796.062
3647	unknown408	0.0579045	0.0920774	24	21	1080.11	0.0440803	0.168276	20	17.9999	4218.25	0.0177924	0.0370745	22	19.525	3374.68	1070.17	0.317118	3891	3995	3885	5095	1110	1615	1697	1988	2944	3515	4457	4511	3914	4291	3679	4989	3473.5
3648	unknown409	1	1	24	12	282.666	0.999997	1	20	12	5205.75	1	1	22	12.1	4893.08	288.495	0.0589597	4876	5141	4302	4501	3287	4985	5185	5571	5589	5136	5158	4940	5015	3158	6635	4538	4876.06
3651	unknown411	0.105571	0.149581	18	15	1541.49	0.464642	0.685719	20	12	9888	0.196939	0.28218	19	13.6167	8562.34	1932.42	0.225688	7984	8557	7911	10390	4888	6738	7461	8076	7789	10441	10214	11108	10058	7321	7331	10431	8543.62
3654	unknown414	0.0579045	0.0920774	18	15	1842.54	0.342358	0.547327	20	12	4000.75	0.0975515	0.153655	19	13.6167	2964.77	1990.41	0.671353	2453	3055	3344	5351	580	736	877	1091	1809	3250	4157	6787	2733	3260	2430	5215	2945.5
3655	unknown415	0.0787266	0.117791	18	15	1102.56	0.543332	0.769083	20	12	3044	0.177592	0.258045	19	13.6167	2387.71	1190.13	0.498441	1830	2267	2630	4051	690	1209	1319	1371	1604	2555	3085	4932	2147	2598	1859	3872	2376.19
3705	unknown460	0.161148	0.217849	18	6	901.561	0.263138	0.452857	20	6	5872	0.176422	0.256431	19	6.01666	4827.28	972.994	0.201561	4097	4686	3949	5693	5693	6674	6279	4842	3089	4544	4418	4415	5045	4129	3051	4746	4709.38
3707	unknown462	0.105571	0.149581	18	6	759.609	0.167622	0.32812	20	6	3415.5	0.0890887	0.142407	19	6.01667	2476.16	946.736	0.38234	1712	1812	1964	2697	2788	3622	4161	3091	1243	2534	2066	2022	2548	2243	1140	2140	2361.44
3711	unknown466	1	1	24	6	113.844	0.983589	1	22.1053	5.69e-05	982.25	0.999865	1	23.0526	2.88161	894.903	139.878	0.156305	842	919	875	1293	1109	1070	959	729	489	757	810	1081	1165	782	630	818	895.5
3750	unknown500	0.105571	0.149581	24	18	9830.91	0.218266	0.395932	20	17.9999	70521.5	0.109922	0.170086	22	18.15	60347.2	15349	0.254345	63541	78105	52927	78134	5936	54942	42504	49959	66732	66800	67560	76096	72431	57408	71359	80888	61582.6
3755	unknown505	0.235786	0.2987	18	15	13746.5	0.475155	0.697524	20	12	87575.8	0.357274	0.474975	19	13.6167	77944.5	20358	0.261185	79013	94307	67513	95810	8015	73301	64133	69997	83470	81547	84119	101167	88142	71575	83085	98763	77747.3
3757	unknown507	0.301037	0.372426	24	21	7698.27	0.613612	0.837487	24.0327	17.9999	23498.2	0.496696	0.627085	24.0163	19.501	16982.7	10205.8	0.600954	39098	32853	16700	7925	7993	12411	11107	8035	17935	11961	8557	3041	44697	21100	19183	9013	16975.6
3761	unknown510	0.0787266	0.117791	18	15	25741.7	0.10807	0.252882	20	12	99609	0.0490632	0.0864302	19	13.6167	82971.8	33071.9	0.398592	89010	104392	67558	105464	6125	68230	40676	63451	96271	97898	99117	105150	103449	80973	91557	103104	82651.6
3775	unknown523	0.105571	0.149581	18	3	571.696	0.419409	0.632987	20	5.99999	2060	0.182302	0.263826	19	4.43333	1889.53	490.832	0.259764	1806	2281	1811	2326	1519	2331	2134	2256	1106	1142	1382	1416	2509	2948	1562	1599	1883
3792	unknown539	0.0787266	0.117791	18	0	2651.65	0.543799	0.769427	24.0327	17.9999	14298.2	0.177708	0.258127	21.0163	18.3786	12966	2417.84	0.186476	14693	14723	16543	16611	9572	9963	12734	11472	9345	11934	12920	14790	15547	19091	9982	12573	13280.8
3798	unknown544	0.0579045	0.0920774	24	21	8176.98	0.312653	0.510478	20	17.9999	90062.5	0.0907305	0.144435	22	19.525	82489.9	9435.79	0.114387	93110	99538	81652	86378	53918	82152	74269	73001	81820	83769	91067	72856	102394	85752	87666	84438	83361.2
3800	unknown546	0.139706	0.189099	24	0	449.543	0.4164	0.629984	24.4321	17.9999	2936	0.223639	0.31453	24.2161	21.0284	2766.71	402.787	0.145584	3381	3007	3124	3104	2221	2653	2673	2236	2057	2462	3031	2510	3454	3371	2260	2659	2762.69
3803	unknown549	0.235786	0.2987	24	0	3365.47	0.575145	0.801537	23.9024	6.63e-05	26431.5	0.406558	0.528647	23.9512	3.32e-05	23962.5	4195.26	0.175076	27303	25805	26124	26494	21255	21487	24263	21127	16547	23006	23651	21242	31353	32450	21755	19646	23969.2
3808	unknown553	0.139706	0.189099	24	0	1720.21	0.551592	0.776965	20.2759	6.63e-05	21486.5	0.27458	0.377199	22.1379	3.62e-05	19844.4	1931.48	0.0973312	22982	22268	20242	20454	17641	21546	21766	19910	15961	18019	19222	17225	24450	22347	18420	17291	19984
3809	unknown554	0.235786	0.2987	24	0	536.34	0.614242	0.837954	23.9024	6.63e-05	6161.75	0.42467	0.548247	23.9512	3.32e-05	5746.62	783.237	0.136295	6665	6019	5908	6055	4580	5500	5889	5525	4636	5546	5247	5484	7256	7255	5381	5020	5747.88
3813	unknown558	0.105571	0.149581	18	3	363.453	0.503002	0.724337	20	6.63e-05	3104	0.208986	0.296886	19	1.58336	2863.48	390.406	0.13634	3317	2902	3146	3051	2528	3030	3216	2938	2364	2453	2772	2397	3863	3477	2770	2651	2929.69
3838	unknown580	0.0787266	0.117791	18	9	977.398	0.0398797	0.167576	20	6	6631	0.0212351	0.0430066	19	7.6	4663.76	1412.36	0.302837	3162	3320	3553	4512	7203	6609	5718	6994	2609	3459	3789	4585	3764	3463	3342	4096	4386.12
3841	unknown583	0.0579045	0.0920774	18	9	6874.14	0.0436182	0.168276	20	6	57262.5	0.0176325	0.03683	19	7.6	44665.3	9075.95	0.203199	35169	37174	36112	42553	54235	59562	53479	61774	30433	37396	40344	43434	40791	37281	35942	40420	42881.2
3882	unknown62	0.0579045	0.0920774	24	21	328.981	0.438006	0.653762	21.6708	17.9999	3441.25	0.118557	0.181268	22.8354	19.4741	3132.27	330.806	0.105612	3257	3907	3153	2915	3032	2705	2481	2786	2735	3083	3351	3224	3817	3564	3590	2794	3149.62
3903	unknown639	0.105571	0.149581	18	9	1239.2	0.0168737	0.159709	20	6	6078	0.0130581	0.0289215	19	7.6	2922.9	2309.31	0.790075	1243	1334	1057	1340	5068	6830	6364	6050	1411	1260	1316	1224	1326	1117	1457	1106	2468.94
3938	unknown670	0.105571	0.149581	18	6	503.46	0.952683	1	20	6.00001	2784.75	0.331582	0.44547	19	6.01667	2536.21	223.028	0.0879374	2830	2580	2199	1986	1703	2695	3732	3009	1744	1410	1697	1756	3959	4539	2050	2258	2509.19
3942	unknown674	1	1	18	3	184.201	0.999644	1	28	5.99998	2019.25	1	1	23	4.38095	2013.7	168.893	0.0838719	2135	1820	2040	1287	1455	2010	2585	2027	1758	1609	1937	1546	3176	3664	1717	1415	2011.31
3955	unknown686	0.0787266	0.117791	18	9	49912.5	0.0238849	0.159709	20	6	127836	0.0136821	0.0300424	19	7.6	51768.9	54616.7	1.05501	11237	8750	9561	17688	94723	131116	167454	118053	10822	11623	12442	9096	10625	11563	25060	6707	41032.5
3979	unknown707	0.235786	0.2987	18	0	373.352	0.358966	0.565826	26.4865	17.9999	981.749	0.293644	0.400214	22.2432	18.6798	978.907	292.104	0.298398	1622	1221	1500	1293	885	873	615	741	565	1136	796	840	1299	569	729	1330	1000.88
3983	unknown710	0.0787266	0.117791	24	18	779.232	0.110759	0.256188	20	17.9999	8329	0.0500697	0.0878452	22	18.15	7536.75	918.571	0.121879	7183	8345	7615	8233	5723	7175	5716	6208	7061	7829	8123	9244	9142	7663	7764	8747	7610.69
4018	unknown742	0.0579045	0.0920774	24	3	324.208	0.417033	0.63028	26.4865	6.63e-05	1777.75	0.114065	0.175723	25.2432	1.57773	1302.47	405.786	0.31155	2370	1784	1535	1422	1477	1469	968	1067	654	1406	928	868	1401	584	1010	1796	1296.19
4044	unknown766	0.0579045	0.0920774	24	0	535.987	0.256624	0.444117	27.1385	6.63e-05	2848.24	0.0774056	0.126478	25.5692	3.12e-05	2028.68	624.704	0.307937	3243	2961	2787	2402	2314	1892	1328	1698	1061	1789	1510	1746	1997	755	1733	2817	2002.06
4053	unknown774	1	1	24	6	896.258	0.999901	1	23.6461	6.00001	7331	1	1	23.8231	6.00033	6540.24	497.526	0.0760715	4329	5965	6888	10642	6554	6052	6896	9822	2700	5019	6195	10416	4863	4642	5342	8273	6537.38
4185	unknown893	0.301037	0.372426	24	0	342.947	0.85028	1	23.0287	6.63e-05	3268.5	0.604773	0.74755	23.5144	3.39e-05	2982.85	442.92	0.148489	3198	3492	3239	3145	2618	2631	3333	2849	2032	2628	2808	3043	3320	4311	2860	2337	2990.25
4191	unknown899	0.235786	0.2987	18	3	322.087	0.656142	0.881779	20	6.63e-05	2150.25	0.443429	0.569578	19	1.58336	1965.47	442.043	0.224904	2042	2227	2266	2066	1914	1700	2432	2260	1190	1411	1751	1831	2932	2956	2018	1651	2040.44
4219	unknown923	0.182589	0.239506	18	3	743.523	0.283725	0.4784	20	6.63e-05	3807.25	0.205162	0.292125	19	1.58336	3268.47	809.125	0.247555	3658	3360	3917	4294	3522	3414	3609	3968	1758	2169	2404	3224	4400	4947	2849	2998	3405.69
4224	unknown928	0.139706	0.189099	24	0	2007.48	0.545218	0.770466	23.6461	6.63e-05	17315	0.272293	0.374318	23.8231	3.34e-05	14910.4	2894.07	0.194098	14604	16786	21002	16868	15921	12068	14291	15025	8514	11367	14038	15698	17710	18501	11530	14916	14927.4
4228	unknown931	0.105571	0.149581	24	0	810.344	0.479942	0.702077	24.4321	6.63e-05	6902.24	0.201783	0.287976	24.2161	3.29e-05	5871.71	1189.24	0.202537	5751	6615	8283	6960	6013	4715	5574	5843	3241	4661	5355	6360	6840	7232	4707	5666	5863.5
4266	unknown966	0.0787266	0.117791	18	6	350.018	0.374176	0.5828	20	6.00001	4025.75	0.13329	0.201517	19	6.01667	3577.54	358.755	0.10028	3316	3703	3777	3748	4432	3450	4939	3282	2958	2864	2912	3049	3984	3826	3387	2918	3534.06
4267	unknown967	0.105571	0.149581	24	0	2085.61	0.189166	0.357993	24.0327	6.63e-05	14539.5	0.0981245	0.154445	24.0163	3.31e-05	12892.8	2256.46	0.175017	13830	14449	15600	14279	11983	10414	14326	11235	10840	11296	11007	11819	14717	15917	13561	10992	12891.6
4277	unknown976	0.235786	0.2987	18	6	586.545	0.269923	0.460675	20	6	4113.25	0.238949	0.333865	19	6.01667	3568.18	340.82	0.0955167	4099	4006	3782	3754	3474	3757	4864	4358	2047	2435	2487	2644	4461	5135	2728	2399	3526.88
4293	unknown990	0.0787266	0.117791	18	0	436.992	0.610641	0.834356	20	18	3319.75	0.193978	0.278398	19	18.05	3040.45	429.986	0.141422	3189	3479	3739	3900	1988	2571	3142	2873	2640	3215	2920	3207	3724	4027	2462	3066	3133.88
4295	unknown992	1	1	18	0	436.462	0.988085	1	24.0327	17.9999	8784.5	0.999929	1	21.0163	18.3786	8518.94	541.393	0.0635517	8645	9728	8856	9337	6015	8274	9127	8753	8222	8772	8129	8435	9347	10264	7510	8017	8589.44
4302	unknown999	0.235786	0.2987	24	0	297.515	0.439239	0.6547	24.1644	6.63e-05	2867.75	0.338408	0.453936	24.0822	3.3e-05	2517.22	410.196	0.162956	2701	3039	3033	2698	2733	2625	1932	2375	1746	2240	1937	2774	3108	2234	2480	2603	2516.12
4303	Uracil	0.475047	0.559107	24	21	1804.89	0.816951	1	24.0327	6.63e-05	19473.7	0.755425	0.901844	24.0163	22.5154	18430.6	2307.89	0.12522	17979	21428	20581	17907	15628	16199	21160	16471	12882	17592	17349	18256	23434	23992	17164	16842	18429
4305	Urea	0.139706	0.189099	24	3	553.665	0.866464	1	20	5.99997	4510	0.376654	0.495718	22	4.67498	4168.68	415.17	0.0995927	4169	5157	3951	4716	3914	6223	4078	3825	3782	2484	3059	3706	6157	3381	4846	3047	4155.94
4323	Val-Thr	0.0579045	0.0920774	18	6	9132.99	0.375567	0.583826	20	6	40682.8	0.105001	0.163486	19	6.01667	31245.2	9817.23	0.3142	24433	27625	24638	25026	32575	43178	44490	42488	19480	21231	24791	28346	35367	40284	23782	23155	30055.6

## Sheet: unique cycling in TS
ID	CycID	JTK_pvalue	JTK_BH.Q	JTK_period	JTK_adjphase	JTK_amplitude	LS_pvalue	LS_BH.Q	LS_period	LS_adjphase	LS_amplitude	meta2d_pvalue	meta2d_BH.Q	meta2d_period	meta2d_phase	meta2d_Base	meta2d_AMP	meta2d_rAMP	X0	X0.1	X0.2	X0.3	X6	X6.1	X6.2	X6.3	X12	X12.1	X12.2	X12.3	X18	X18.1	X18.2	X18.3	TS
2	(-)-Syringaresinol-4-O-.beta.-D-glucopyranoside	0.00267199	0.00936821	18	9	328.451	0.0156387	0.159709	20	6	1922.75	0.000463118	0.00236196	19	7.6	734.141	882.683	1.20233	98	124	63	44	1713	2168	1841	1969	134	207	117	108	147	89	93	55	560.625
4	(3-Carboxypropyl)trimethylammonium cation	1.91e-05	0.00025515	18	9	470.403	0.022491	0.159709	20	6.00001	3453.5	6.72e-06	0.000101178	19	7.60001	1987.05	1219.25	0.613596	876	853	966	909	3497	3540	3368	3409	1516	1386	1376	1397	1531	1028	1188	1118	1747.38
5	1-(2-Hydroxyethyl)-2,2,6,6-tetramethyl-4-piperidinol	0.0144977	0.0319142	24	18	167.938	0.32281	0.522725	20	17.9999	472.249	0.0297857	0.0571939	22	18.15	320.327	220.357	0.687915	369	293	204	952	67	25	52	102	295	350	516	295	615	588	329	357	338.062
19	2,8-Quinolinediol	8.77e-05	0.00082364	18	9	328.098	0.0205155	0.159709	20	5.99998	1204.75	2.56e-05	0.000291668	19	7.59999	573.413	512.075	0.893031	154	169	158	150	1100	1170	1089	1460	247	339	258	428	224	147	186	285	472.75
25	2'-O-Methyladenosine	0.022073	0.0442893	24	21	119.501	0.14741	0.302702	24.9858	17.9999	204.249	0.0218912	0.0441084	24.4929	19.5381	122.402	128.054	1.04617	131	182	217	270	NA	17	10	38	24	25	37	147	138	98	221	360	127.667
28	3-(2-Pyrimidinyl)propanoic acid	0.00215962	0.00872309	18	9	43.1335	0.0361553	0.166866	20	6	297	0.000816558	0.00352161	19	7.6	231.769	56.3728	0.243228	182	202	170	172	296	302	320	270	215	198	227	199	200	218	172	188	220.688
30	3.alpha.-Galactobiose-CH3	2.22e-07	7.82e-06	18	9	1911.66	0.0148012	0.159709	20	6	22174.5	6.75e-08	3.76e-06	19	7.6	8150.36	10560.9	1.29576	199	194	234	216	21575	21727	23316	22080	1136	1749	1239	1300	444	598	651	531	6074.31
35	3-Hydroxybutyric acid	0.0210199	0.0421957	18	6	982.525	0.422678	0.63682	20	5.99999	5204.5	0.0508506	0.0890348	19	6.01666	4266.8	1044.29	0.244747	3413	3682	3091	3727	5205	5793	5355	4465	3060	4142	4064	3468	4974	3912	4063	3830	4140.25
36	3-Hydroxybutyrylcarnitine	2.89e-06	5.71e-05	24	0	3710.01	0.0107951	0.159709	23.52	5.49e-05	12157.5	5.7e-07	1.44e-05	23.76	2.77e-05	7958.29	4976.35	0.625304	12627	12431	12815	10757	7021	7819	6374	7431	3416	3482	3574	3569	11122	8485	9473	7578	7998.38
49	3'-O-Methylinosine	0.00267199	0.00936821	18	9	175.362	0.0255321	0.159709	20	6.00002	774.25	0.000722656	0.00323318	19	7.60001	491.965	233.825	0.475288	308	371	257	240	769	752	781	795	314	388	491	341	396	349	306	278	446
54	4-Hydroxy-3-methoxymandelic acid	0.0419656	0.0724237	24	21	119.324	0.214043	0.390892	21.1511	17.9999	793.749	0.051312	0.089553	22.5755	19.4829	677.216	125.993	0.186045	754	689	720	842	459	489	659	512	502	675	740	750	739	784	994	658	685.375
62	5-Methoxy-3-indoleacetic acid	0.00421867	0.0128369	18	9	459.266	0.0161081	0.159709	20	6	2428.75	0.000720092	0.00322774	19	7.6	995.24	1068.86	1.07398	205	207	219	179	2093	2338	2591	2693	371	242	343	190	273	239	187	192	785.125
64	5'-Methylthioadenosine	0.00980952	0.0239973	24	12	131.522	0.113626	0.259021	20	12	811	0.0086932	0.0205243	22	12.1	643.208	191.038	0.297009	564	530	476	519	607	718	542	682	658	789	903	894	597	421	496	715	631.938
65	5'-S-Methyl-5'-thioadenosine	0.000987235	0.00460639	24	9	4659.66	0.114647	0.260072	21.0501	5.99998	22694.8	0.00114162	0.00445241	22.5251	7.43364	17236.5	5799.05	0.336441	15459	16081	10056	9707	28568	21207	20182	20822	18393	21081	16607	18160	16172	8041	14890	14576	16875.1
68	7-Methylguanosine	0.00421867	0.0128369	24	0	181.019	0.129785	0.279448	24.2975	6.63e-05	821.999	0.00465947	0.0126051	24.1488	3.3e-05	634.906	215.124	0.338829	897	821	832	738	470	639	564	623	487	435	465	451	659	962	704	395	633.875
69	8-Oxo-2-deoxyadenosine	0.0065055	0.0176718	18	6	105317	0.0694996	0.20048	20	6	693518	0.00393422	0.0111341	19	6.01667	590158	87811.7	0.148793	607230	588562	615826	553775	662813	631704	767344	712210	411918	491756	513516	498393	607118	636037	515921	458152	579517
70	9-(2,3-Dihydroxypropoxy)-9-oxononanoic acid	0.0144977	0.0319142	24	6	3574.42	0.0235203	0.159709	20	5.99997	17595.5	0.00306334	0.00929407	22	6.04999	10133.6	6162.76	0.608152	9719	9060	8877	7324	20358	14076	21240	14708	4674	7578	5382	5262	7549	5935	6576	7703	9751.31
84	Ala-Arg	0.00980952	0.0239973	24	3	738.043	0.0438599	0.168276	20	6	4039.75	0.00376514	0.0108039	22	4.675	3367.36	779.405	0.231459	3906	4036	3585	3089	3684	4628	3779	4068	2157	2639	2738	2461	3669	2751	2963	3342	3343.44
87	Ala-Gln	0.00980952	0.0239973	18	6	1319.64	0.28669	0.481336	20	6	9848.5	0.019331	0.039764	19	6.01667	8454.1	1296.38	0.153343	8007	7709	8230	8411	8171	9784	11188	10251	6167	6840	7524	7544	8529	9948	6528	7921	8297
90	Ala-Ile/Leu-Ala-Ile/Leu	0.000572095	0.00320048	18	0	789.838	0.0718584	0.203098	25.2722	17.9999	3180.75	0.000456288	0.00233814	21.6361	18.5231	2966.86	695.496	0.234421	3737	4241	3910	3531	2195	2317	2440	2895	2176	2819	2972	2652	3565	2859	3173	3126	3038
93	Ala-Leu-Ala-Leu	0.0419656	0.0724237	24	3	1021.77	0.297619	0.492996	24.9858	4.15e-05	8398.5	0.0672305	0.112094	24.4929	1.53083	7065.13	1481.14	0.209641	9586	8199	8406	7403	8745	6949	6171	6846	4168	7272	5335	6644	7874	6172	5724	7366	7053.75
95	Ala-Lys	0.0299489	0.0559443	24	3	3248.27	0.305715	0.502282	20	6	32591.2	0.0521276	0.090684	22	4.675	28276.9	4962.78	0.175507	30168	36220	29026	23169	41035	30373	30052	28905	21367	25849	25435	22744	27227	26311	26734	25378	28124.6
97	Ala-Phe	0.000987235	0.00460639	18	6	8051.12	0.0361705	0.166866	20	6	23577	0.000401371	0.00216426	19	6.01667	16274.7	6455.95	0.396686	17367	18309	14546	11826	23306	25067	21619	24316	6850	8987	9022	9707	17124	9479	12005	18348	15492.4
100	Ala-Pro-Lys	8.77e-05	0.00082364	18	9	1290.47	0.0422158	0.168276	20	6	7717.25	5e-05	0.000477228	19	7.6	6207.92	1443.69	0.232556	4697	4838	4263	5245	7242	7906	7820	7901	5523	5726	6271	5986	5236	6046	5168	4918	5924.12
102	Ala-Trp	0.0177588	0.0389345	18	6	718.067	0.22345	0.402837	20	6	4076	0.0259102	0.0506049	19	6.01667	3374.72	597.007	0.176905	3292	3457	3401	3230	3230	4254	4663	4157	2200	2223	2666	2552	4133	4175	2734	2471	3302.38
103	Ala-Tyr	0.000987235	0.00460639	18	6	1242.74	0.0371739	0.166866	20	5.99997	3782.5	0.000411501	0.00218626	19	6.01665	2524.48	1211.36	0.479844	2228	2508	2046	1593	3950	3866	3304	4010	1164	1570	1601	1702	2437	1660	1815	2589	2377.69
106	Allantoin	0.0065055	0.0176718	24	3	3412.32	0.282399	0.476906	22.1053	6.63e-05	13512.7	0.0134103	0.0295806	23.0526	1.44082	9811.01	4576.08	0.466423	11884	11557	13075	17535	6676	8728	10884	20525	3181	4542	5164	8597	9091	8555	7020	11481	9905.94
118	Arg-Trp	0.00267199	0.00936821	18	9	3156.35	0.0433753	0.168276	20	6.00001	14134.2	0.00116626	0.00449941	19	7.60001	8943.34	4231.27	0.473119	5170	6461	4342	3617	14402	14161	12918	15056	5581	5997	8023	7364	7276	6172	5753	7492	8111.56
119	Arg-Val	0.00267199	0.00936821	18	9	1002.32	0.0371884	0.166866	20	5.99998	3558.25	0.0010152	0.00407776	19	7.59999	2127.96	1132.95	0.532413	1189	1476	926	964	3143	4187	3103	3800	1313	1392	1731	1532	1564	1297	1085	1782	1905.25
120	Asn-Ala	0.00421867	0.0128369	18	6	2834.26	0.0280754	0.160845	20	6	7100	0.00118928	0.00456118	19	6.01667	4408.92	2776.22	0.629682	2917	3328	2803	2725	6776	6746	7549	7329	2389	2714	3232	3207	3936	3726	2860	2923	4072.5
124	Asn-His	0.0419656	0.0724237	18	6	1023.89	0.370634	0.578949	20	6	6038	0.0803116	0.130292	19	6.01667	5229.28	731.044	0.139798	5049	6300	4455	4547	5991	5154	6699	6308	4261	4516	4539	4199	5404	6085	4183	4561	5140.69
127	Asn-Met	0.00164724	0.00666594	18	6	781.176	0.0896167	0.227699	20	6.00001	2958	0.00144976	0.00531538	19	6.01667	2159.11	760.143	0.352062	1866	1917	2008	1799	2523	2886	3179	3244	1038	1376	1514	1630	2563	2362	1463	1704	2067
129	Asn-Pro-Arg	0.0121536	0.0296814	24	9	206.475	0.0736104	0.205634	21.1511	6	3638.25	0.00717415	0.01761	22.5755	7.43496	3271.85	274.688	0.083955	3102	3356	3243	3092	3906	3337	3771	3539	3102	3098	3237	3376	2913	3276	2795	2942	3255.31
130	Asn-Tyr	0.000572095	0.00320048	18	6	1201.37	0.0336324	0.166163	20	5.99998	3846	0.000228168	0.00147458	19	6.01666	2647.38	1155.86	0.436607	2257	2578	2153	1940	3883	4005	3452	4044	1360	1671	1930	1784	2824	2077	1791	2368	2507.31
131	Asn-Val	0.000572095	0.00320048	18	6	3991.09	0.0564774	0.184425	20	5.99998	13133	0.000366404	0.00201081	19	6.01666	9134.08	3840.56	0.420465	8206	8585	7645	6517	11562	12804	14208	13958	4645	5510	5928	6001	10578	9169	5893	7490	8668.69
134	Asp-Arg	0.0144977	0.0319142	18	0	1082.58	0.32272	0.522725	20	17.9999	9746.25	0.0297787	0.0571939	19	18.05	8844.4	1090.35	0.123281	8946	9851	11049	9976	7722	6218	7506	8116	9467	9550	9609	8306	8378	12329	9538	8740	9081.31
137	Asp-Glu	0.0299489	0.0559443	24	12	102.53	0.213738	0.3905	24.5682	12	578.5	0.0387355	0.0710096	24.2841	12.0016	447.98	129.139	0.28827	171	306	390	374	467	306	555	472	607	458	648	601	388	648	410	386	449.188
145	Benzoic acid	0.00980952	0.0239973	18	9	2903.38	0.0201697	0.159709	20	6	23503.5	0.00188516	0.00647838	19	7.6	14737.9	6713.71	0.455541	10612	9274	9181	8647	22198	25500	23271	23045	9052	11094	12099	10193	9943	10679	8506	11396	13418.1
148	Betaine aldehyde cation	0.0144977	0.0319142	18	9	251.73	0.712155	0.934717	20	6.00001	1618	0.0575415	0.09848	19	7.60001	1413.82	226.41	0.160141	1247	1116	1241	951	1802	1511	1713	1446	1118	1424	1373	1706	1255	1403	909	1694	1369.31
154	Caffeic acid	0.00267199	0.00936821	24	6	38.8909	0.119919	0.26712	20	6	807.75	0.0028985	0.00888847	22	6.05	283.376	492.712	1.73872	98	60	89	64	1296	287	1217	431	57	77	51	89	72	44	62	51	252.812
157	Carnosine	0.0144977	0.0319142	18	6	2151.9	0.187667	0.356473	20	6	13925.8	0.0187918	0.0387839	19	6.01667	11859.9	1820.55	0.153505	11420	12979	11790	10289	13427	12371	16094	13811	8463	10516	9310	9381	12449	13942	10508	9478	11639.2
161	Cirsimarin	0.00344533	0.0120018	18	9	119.855	0.34093	0.546144	20	6	884.25	0.00909955	0.0213324	19	7.6	322.416	413.533	1.2826	15	14	21	27	2127	184	643	583	24	29	25	70	27	35	23	11	241.125
163	Citrulline	0.00344533	0.0120018	18	9	85.2064	0.02486	0.159709	20	5.99999	322	0.000887792	0.0037358	19	7.6	164.452	120.573	0.733179	44	96	60	70	300	379	345	264	81	96	78	104	77	105	66	87	140.75
164	CMPF	0.0254844	0.0510159	18	6	26.163	0.607126	0.831916	20	6	111.75	0.0799715	0.129837	19	6.01667	82.4758	31.2615	0.379039	69	65	60	53	102	146	107	92	63	71	61	42	78	53	125	72	78.6875
165	Coniferylaldehyde	0.0065055	0.0176718	24	9	48.4368	0.0277407	0.160845	20	6	681.5	0.00173608	0.00611655	22	7.425	286.366	261.283	0.912408	185	124	100	117	457	593	780	896	135	136	136	113	119	132	109	99	264.438
169	Cyclic adenosine diphosphate ribose	0.0299489	0.0559443	18	15	295.747	0.849306	1	20	12	2015.75	0.118826	0.181615	19	13.6167	1810.34	357.877	0.197685	1644	1853	1920	2391	1386	1550	1358	1767	1801	2184	2019	2059	1542	1574	1740	2122	1806.88
170	Cyclo(Leu-Pro)	0.0419656	0.0724237	18	6	627.38	0.301755	0.497942	20	6	3966.5	0.06799	0.113099	19	6.01667	3320.37	553.373	0.16666	3426	3368	3163	3276	3238	4289	4215	4124	2026	2568	2758	3047	3741	4091	2221	2502	3253.31
173	Cystine	0.00980952	0.0239973	24	21	2935.2	0.0591731	0.187903	20	17.9999	19414	0.00490587	0.0130803	22	19.525	16935.9	3022.53	0.178469	20228	20411	19743	16650	14210	12040	12486	10502	18744	17744	17370	17656	21340	21498	15443	19375	17215
178	Diprotin B	0.00267199	0.00936821	18	6	508.41	0.0570672	0.185233	20	6	2194.25	0.00149258	0.00542701	19	6.01667	1702.42	423.337	0.248667	1808	1733	1608	1579	2031	2020	2291	2435	941	1192	1164	1224	2049	1807	1222	1314	1651.12
179	Disaccharide 01	8.77e-05	0.00082364	18	9	1216.93	0.0143155	0.159709	20	6	10110.2	1.83e-05	0.000227205	19	7.6	4157.82	4613.03	1.10948	746	593	815	568	10561	9570	10191	10119	1361	2086	1377	1079	765	727	645	813	3251
180	Disaccharide 02	2.22e-07	7.82e-06	18	9	1319.11	0.0149771	0.159709	20	6	16144.2	6.82e-08	3.76e-06	19	7.6	6425.76	7441.74	1.15811	761	858	771	558	16260	15809	15933	16575	1736	2441	1848	1531	1413	969	1009	934	4962.88
182	Disaccharide 04	2.22e-07	7.82e-06	18	9	4464.32	0.016551	0.159709	20	5.99998	19940.8	7.5e-08	3.76e-06	19	7.59999	9003.11	8954.11	0.994556	1712	2151	1773	1433	17861	19899	21009	20994	5124	6241	4024	3464	2661	2283	2737	2521	7242.94
184	Disaccharide 06	2.22e-07	7.82e-06	18	9	18500.4	0.0149435	0.159709	20	5.99999	168988	6.81e-08	3.76e-06	19	7.6	65555.7	80625.9	1.22988	3032	2957	3212	3115	171617	171473	170127	162733	15830	20574	20225	20600	6421	7483	8223	7681	49706.4
185	Disaccharide 07	2.22e-07	7.82e-06	18	9	20932.5	0.0155482	0.159709	20	5.99999	118852	7.07e-08	3.76e-06	19	7.59999	47353.8	56568.4	1.19459	3013	2570	2872	2807	110391	127678	120517	116821	14431	17761	17838	16086	5382	6506	7932	7134	36233.7
186	Disaccharide 08	2.22e-07	7.82e-06	18	9	1330.07	0.0156898	0.159709	20	6	7082.25	7.13e-08	3.76e-06	19	7.6	2628.11	3335.09	1.26901	120	116	142	149	6106	7734	7231	7258	382	484	490	415	184	262	306	181	1972.5
191	Disaccharide 13	2.22e-07	7.82e-06	18	9	11719.2	0.015298	0.159709	20	5.99999	71758.8	6.96e-08	3.76e-06	19	7.6	28448.2	34263.2	1.20441	1531	1420	1623	1736	67102	76319	73493	70121	8473	10584	10518	9599	2883	3783	4056	4164	21712.8
192	Disaccharide 14	2.22e-07	7.82e-06	18	9	3575.49	0.0151761	0.159709	20	6	20214.8	6.91e-08	3.76e-06	19	7.6	7210.36	9683.41	1.34299	62	71	67	77	18019	21096	22451	19293	581	846	835	816	132	181	208	174	5306.81
195	D-myo-Inositol, 1-[2-hydroxy-3-[(1-oxo-9,12-octadecadienyl)oxy]propyl hydrogen phosphate], [S-(Z,Z)]-	0.000320124	0.00217263	18	6	34225.7	0.0713571	0.202475	20	6	91827.8	0.000266965	0.00161899	19	6.01667	40124.9	51624.4	1.28659	20184	14759	22017	13080	148060	64526	100109	54616	5678	13134	8963	4128	13933	24679	15111	18928	33869.1
197	Dolasetron	0.00267199	0.00936821	24	6	333.754	0.0245524	0.159709	20	5.99997	1510	0.000697492	0.00315914	22	6.04999	828.954	565.521	0.68221	766	777	697	615	1774	1225	1905	1136	397	478	419	468	552	393	613	487	793.875
198	Donepezil	0.000987235	0.00460639	24	0	706.046	0.0515944	0.179562	25.2722	6.63e-05	6710.99	0.000554433	0.00267636	24.6361	3.23e-05	5556.65	1100.68	0.198083	6487	6699	7438	6220	5234	5338	5253	5787	3727	5311	4336	4865	6024	5701	4642	5503	5535.31
199	Eicosenoic acid	0.000446109	0.00300881	18	6	313.602	0.0586755	0.187364	20	6.00001	743	0.000302347	0.00175308	19	6.01667	389.89	351.357	0.90117	200	186	342	205	723	549	989	711	83	195	150	92	202	407	181	342	347.312
200	Enrofloxacin	0.00267199	0.00936821	24	12	301.581	0.109404	0.254546	24.5682	12	1270	0.00267117	0.00835706	24.2841	12.0016	992.168	356.268	0.35908	842	792	624	433	1105	1250	937	1206	1486	1334	1332	928	1237	785	903	734	995.5
201	Erucamide	0.0419656	0.0724237	24	12	75748.1	0.374972	0.583419	24.7059	12	260278	0.0810685	0.131323	24.3529	12.0025	183034	91879.3	0.501978	68902	85530	164205	64645	298091	197674	75361	264910	144046	198901	327488	370678	187296	149109	216462	132355	184103
202	Erythronolactone	2.89e-06	5.71e-05	18	9	5978.23	0.0398834	0.167576	20	6.00001	18299.2	1.95e-06	3.97e-05	19	7.60001	10821.1	6261.93	0.578678	4700	6340	5092	4129	21142	21121	15655	15279	7150	9469	7989	7199	7903	7100	6411	6763	9590.12
204	Ferulic acid	0.0499351	0.0858693	18	6	96.5201	0.939019	1	20	6	511	0.190371	0.273856	19	6.01667	322.731	188.613	0.584427	308	171	259	177	1043	446	268	287	100	141	197	149	762	178	115	197	299.875
206	Galactosamine	2.89e-06	5.71e-05	18	9	541.29	0.0174057	0.159709	20	5.99999	4286	8.94e-07	2.04e-05	19	7.6	2016.14	1772.59	0.8792	617	696	517	514	4510	4030	4257	4347	953	1094	916	1012	954	701	855	710	1667.69
214	Gln-Ala	0.00267199	0.00936821	18	6	2003.23	0.158294	0.317026	20	6.00002	10227.8	0.00370861	0.0106913	19	6.01667	8223.08	1918.78	0.233341	7560	8755	7217	6609	8615	11540	10363	10393	5774	6569	6533	6500	9915	7394	6296	7816	7990.56
215	Gln-Gln	0.00421867	0.0128369	18	6	784.889	0.472457	0.69512	20	6	6048	0.0143866	0.0313981	19	6.01667	5098.63	922.771	0.180984	4292	5150	4733	4614	4635	5720	7006	6831	3850	3766	4170	4391	4954	6353	4360	4964	4986.81
216	Gln-Ile	0.00267199	0.00936821	18	6	1906.01	0.0296537	0.160845	20	6	9606.25	0.000827453	0.0035474	19	6.01667	7659.1	1648.71	0.215261	7486	7969	7952	7296	8745	9662	9995	10023	4737	5284	5775	5827	8357	7840	5661	6740	7459.31
217	Gln-Leu	0.00267199	0.00936821	18	6	3010.51	0.0189135	0.159709	20	6	14449	0.000550488	0.00266535	19	6.01667	11260.7	2769.64	0.245956	10948	11781	11297	10468	13100	14728	14723	15245	7498	8359	8104	8342	12134	9683	8923	9468	10925.1
219	Gln-Met	0.00131724	0.00611979	18	6	1217.81	0.0254358	0.159709	20	6.00001	3604	0.000378735	0.00205762	19	6.01667	2350.38	1199.74	0.510442	2003	2250	1897	1650	3208	3695	3582	3931	1014	1377	1538	1501	2381	1835	1538	1880	2205
220	Gln-Phe	0.000320124	0.00217263	18	6	754.483	0.100574	0.243726	20	6	3232.25	0.000365222	0.00200687	19	6.01667	2528.7	646.373	0.255614	2443	2591	2397	2014	3038	3384	3490	3017	1296	1965	1770	1927	2913	2573	1769	2619	2450.38
222	Gln-Tyr	0.0065055	0.0176718	18	6	2207.59	0.0633888	0.193348	20	5.99998	7065.5	0.00362626	0.010531	19	6.01666	4698.62	2233.74	0.475404	4543	5263	3425	2958	7910	7644	5391	7317	2342	3145	2850	2822	4467	2417	3067	5286	4427.94
223	Gln-Val	0.00267199	0.00936821	18	6	4304.16	0.0299661	0.161299	20	6.00002	14709.8	0.000835332	0.00357096	19	6.01667	10125.5	4426.7	0.437184	8615	8888	9283	7381	12947	14759	15160	15973	5042	7066	7531	6807	10514	8193	7186	8080	9589.06
229	Glucuronic acid	0.0499351	0.0858693	24	6	97.7575	0.0643331	0.194527	20	6	622.75	0.0216544	0.0437534	22	6.05	496.541	96.3783	0.194099	446	428	487	624	643	654	604	590	325	392	446	494	452	402	391	471	490.562
232	Glu-His	0.0144977	0.0319142	18	0	374.413	0.156906	0.315165	20	17.9999	2541.25	0.0161188	0.0344494	19	18.05	2315.41	327.769	0.14156	2672	2931	2580	2579	1952	1627	1857	2022	2614	2582	2390	2215	2361	3071	2509	2224	2386.62
235	Glu-Lys	0.00421867	0.0128369	18	0	1583.04	0.366058	0.574617	20	17.9999	8513.25	0.0115407	0.0260226	19	18.05	8070.92	1241.31	0.1538	9147	11456	9692	9398	7815	5529	6719	6463	8712	8628	7449	8389	7894	9954	8296	7909	8340.62
242	Glu-Val-Phe	2.89e-06	5.71e-05	24	0	582.479	0.0215332	0.159709	25.4179	6.63e-05	2599.74	1.09e-06	2.37e-05	24.7089	3.22e-05	1971.03	619.789	0.31445	2570	2639	2715	2475	1627	1741	1573	1688	1431	1575	1592	1554	2452	1808	1881	2003	1957.75
243	Gly-Arg	8.77e-05	0.00082364	18	0	10868.9	0.0760022	0.208465	24.1644	17.9999	60427.7	8.61e-05	0.000725304	21.0822	18.3931	52062.2	14048.3	0.269838	68213	83595	63266	53891	46510	36944	41628	40293	48486	48801	47145	41113	61704	65271	62589	52147	53849.8
246	Glycerol trilaurate	2.89e-06	5.71e-05	24	21	35152.4	0.0177008	0.159709	23.7736	17.9999	88593.2	9.09e-07	2.06e-05	23.8868	19.4933	53799.9	37788.7	0.702394	66234	92054	57097	59440	13091	15306	15128	26220	37050	36436	43037	48274	100481	64703	93864	95326	53983.8
256	Gly-Pro-Arg	0.0210199	0.0421957	18	0	1060.66	0.378262	0.586886	20	17.9999	8991.75	0.0463899	0.0825599	19	18.05	8478.75	916.442	0.108087	9397	11304	7899	9969	6861	7799	6899	7368	7647	9735	9215	8786	9310	8644	9191	8822	8677.88
259	Gly-Thr	0.0144977	0.0319142	18	6	781.707	0.609802	0.834356	20	5.99999	6653.5	0.0506431	0.0887433	19	6.01666	5866.06	781.888	0.13329	5380	5315	5482	5746	5579	6825	7363	6847	4469	5034	5096	5503	6509	6907	4757	5529	5771.31
269	Hexadecanedioic acid	0.000572095	0.00320048	18	6	1258.83	0.0505128	0.178352	20	6	4971.5	0.000330933	0.00187883	19	6.01667	3830.6	1037.01	0.270716	4390	3747	3301	3054	5509	4821	4928	4628	2664	2843	2644	2672	4133	3927	2913	3105	3704.94
270	Hexanoic acid, 5-(acetylamino)-4-oxo-	0.00164724	0.00666594	18	9	775.343	0.025601	0.159709	20	6.00002	2765.75	0.000466992	0.00236835	19	7.60001	1504.64	1045.14	0.694613	744	479	665	566	2940	2950	2766	2407	526	1327	1051	1174	624	658	1037	873	1299.19
272	His-Ala	0.00164724	0.00666594	18	6	1660.64	0.030062	0.161299	20	6.00001	4372.25	0.000540412	0.00264704	19	6.01667	2758.41	1605.87	0.582171	2140	2542	1886	1640	3977	4725	4434	4353	1425	1421	1956	1721	2513	2216	1710	2362	2563.81
274	His-Gln	0.00267199	0.00936821	18	6	3691.8	0.0601164	0.188828	20	6	11449.5	0.00156396	0.00563391	19	6.01667	7863.98	3720.04	0.473048	5382	6935	6211	4640	11063	10781	12464	11490	4472	6063	5984	5685	7822	7688	5666	6265	7413.19
278	His-Met	8.77e-05	0.00082364	18	6	4227.79	0.0295282	0.160845	20	6	10758	3.59e-05	0.000373657	19	6.01667	6540.46	4146.37	0.633958	5265	6116	4233	3767	10517	11114	9529	11872	2971	3588	3695	3484	6468	4163	4472	5354	6038
279	His-Phe	0.000320124	0.00217263	18	6	7665.74	0.0561575	0.183796	20	5.99997	23217.5	0.000214406	0.00140663	19	6.01665	13711.9	9135.09	0.666218	11400	13082	10038	7609	25089	29201	15454	23126	4619	6893	6527	6427	13092	6643	8723	13755	12604.9
280	His-Pro	0.0210199	0.0421957	18	6	1712.61	0.0406779	0.167576	20	6	4650.25	0.00689538	0.0170807	19	6.01667	2728.51	1949.17	0.714371	1481	1763	1870	2015	3738	4687	5234	4942	1191	1558	1678	1723	2373	2847	1434	1343	2492.31
281	His-Ser	0.000987235	0.00460639	18	6	3031.9	0.0376797	0.167576	20	6.00001	7540.5	0.000416597	0.00220521	19	6.01667	4791.04	2771.99	0.578578	3666	4597	3212	2392	7090	7644	7506	7922	2618	2801	3216	2987	4809	3914	3505	3403	4455.12
282	Histamine	0.00980952	0.0239973	24	0	17090.6	0.244495	0.429479	21.6708	5.94e-05	96455.7	0.0168677	0.035628	22.8354	3.13e-05	77629.4	20712	0.266806	94247	97738	85142	108696	56803	70529	76188	116328	37144	52016	51691	78951	82180	80568	72087	95913	78513.8
284	His-Thr	0.0144977	0.0319142	18	9	2091.62	0.0373682	0.167316	20	5.99999	8666.25	0.00461612	0.012563	19	7.59999	5229.76	2691.44	0.514638	2488	2909	3650	2691	8827	7403	9111	9324	2225	3814	3860	4768	3314	4841	2549	3437	4700.69
286	His-Trp	8.77e-05	0.00082364	18	6	2499.98	0.0392887	0.167576	20	6.00001	7415.25	4.68e-05	0.00045546	19	6.01667	4703.14	2690.87	0.572144	3326	4094	3600	3083	6060	7323	8269	8009	2289	2634	2957	2910	4691	4262	3283	3243	4377.06
287	His-Tyr	0.0065055	0.0176718	18	6	6194.96	0.0924176	0.231932	20	6	21103	0.00506021	0.013323	19	6.01667	14242.9	6414.96	0.450396	13075	15311	11969	9666	24126	23708	14123	22455	6538	8306	9661	8906	13064	7177	10128	17236	13465.6
291	Ile-Ala-Lys	0.0121536	0.0296814	24	3	392.798	0.0991428	0.241625	23.2718	4.91e-05	3392	0.00930376	0.0216704	23.6359	1.47727	2862.32	700.905	0.244873	3633	3889	3201	2845	3373	2648	2654	2914	2000	2648	2171	2356	3037	2911	2535	3061	2867.25
296	Ile-Gly-Ile	0.000987235	0.00460639	24	0	3611.19	0.0318267	0.163475	23.7736	6.77e-05	21717	0.000357189	0.0019854	23.8868	3.4e-05	16918.6	5062.97	0.299255	21021	22456	23741	19650	16864	16057	17042	16667	9467	11770	12297	14555	21052	18592	14713	15057	16937.6
297	Ile-Gly-Leu	0.0299489	0.0559443	24	3	4104.4	0.216387	0.393514	21.0501	6.63e-05	28212.5	0.0391358	0.0716525	22.5251	1.40785	23906.2	6268.25	0.262202	26230	28105	30205	28310	24253	23405	25936	26116	14976	16459	19683	22256	28646	32337	17109	22061	24130.4
299	Ile-Ile	0.000779665	0.00435045	18	6	6831.36	0.0265876	0.159895	20	6.00001	14828.8	0.000244274	0.00153139	19	6.01667	7444.91	6876.38	0.923636	6571	6691	5330	4340	16648	16395	10186	16086	647	1546	1648	2056	7068	2212	1671	6691	6611.62
300	Ile-Leu	0.000987235	0.00460639	18	6	133819	0.0207901	0.159709	20	6	338090	0.000242066	0.00152783	19	6.01667	201385	126951	0.630388	192215	196286	148408	145238	332416	365084	288885	365975	70141	91741	97621	93538	199586	102790	110449	175642	186001
303	Ile-Met	0.00421867	0.0128369	18	6	9132.64	0.0250389	0.159709	20	6	21897.2	0.00107274	0.00425615	19	6.01667	11442.2	10126.3	0.885	8455	10902	6219	5761	22412	24569	16810	23798	3255	4238	4348	4648	9303	3853	5088	9782	10215.1
304	Ile-Phe	0.00267199	0.00936821	18	6	19909.3	0.0455838	0.170561	20	5.99998	55344.8	0.0012196	0.00466095	19	6.01666	30073.9	24303.4	0.808123	25314	26812	19050	15856	62018	71025	36496	51840	8193	12378	12193	11739	24142	11894	14356	30755	27128.8
305	Ile-Pro-Ile	0.0065055	0.0176718	18	6	1428.89	0.0993618	0.24176	20	6.00001	5696.25	0.0053936	0.0139512	19	6.01667	4132.21	1529.92	0.370242	3346	3511	3317	3863	4881	5486	6547	5871	2256	2922	3071	3138	4691	4624	2752	2873	3946.81
306	Ile-Trp	0.00421867	0.0128369	18	6	6129.2	0.0174379	0.159709	20	6	21872.5	0.000773705	0.00339771	19	6.01667	15041.5	5756.56	0.382713	15395	16294	15539	13687	19147	23737	20923	23683	6109	7707	8133	7410	16217	13059	9522	12940	14343.9
307	Ile-Tyr	0.000987235	0.00460639	18	6	2022.33	0.0538294	0.181591	20	6	5586.75	0.000576197	0.0027447	19	6.01667	3591.58	1812.56	0.504669	3786	4206	2609	2347	5415	6536	4337	6059	1378	1685	1732	1834	3546	1992	2270	4219	3371.94
309	Ile-Val	0.00980952	0.0239973	18	6	417.193	0.0190363	0.159709	20	5.99998	1261.75	0.00179003	0.00623057	19	6.01665	766.824	467.895	0.610173	621	729	712	486	1252	1039	1281	1475	318	485	438	460	545	371	517	633	710.125
311	Indole-3-carboxaldehyde	0.0419656	0.0724237	18	6	645.942	0.0265533	0.159895	20	6	1688.5	0.00869118	0.0205243	19	6.01667	1045.83	637.588	0.60965	690	617	817	1005	1649	1555	1856	1694	606	689	733	635	836	1038	452	625	968.562
312	Inosine	0.0065055	0.0176718	24	6	40176.6	0.13493	0.287098	20	6	645171	0.00705572	0.0173784	22	6.05	579725	49674.6	0.0856866	568499	587495	554840	562284	606971	694376	636561	642776	479874	552529	553179	535283	634925	548945	530409	537349	576643
313	Irbesartan	0.0144977	0.0319142	18	6	191.979	0.524069	0.747191	20	6	927.75	0.0446743	0.080033	19	6.01666	739.442	189.835	0.256728	728	602	610	623	810	1076	976	849	491	503	688	558	1054	713	680	502	716.438
315	Isomaltose A	2.89e-06	5.71e-05	18	9	1314.51	0.0163601	0.159709	20	5.99999	8345.5	8.44e-07	1.97e-05	19	7.6	4174.25	3263.32	0.781774	1693	1872	1510	1385	8013	8387	7833	9149	2499	2134	2443	2207	1766	1725	2025	1883	3532.75
320	L-.beta.-Homolysine	7.77e-06	0.000124608	18	9	15537.6	0.0188879	0.159709	20	5.99999	107258	2.46e-06	4.62e-05	19	7.59999	54308.8	42172.5	0.776531	17214	20681	19208	20718	102710	105872	112043	108407	21860	32371	34375	37603	25967	21467	23739	32063	46018.6
321	L-.beta.-Homomethionine	0.00164724	0.00666594	24	3	1443.2	0.079949	0.214971	26.0177	4.3e-05	9939.49	0.00130839	0.00490932	25.0088	1.56307	7959.07	1925.29	0.241899	9814	11031	10202	8711	7094	8110	7475	9179	4707	7231	6638	6941	8996	7035	6338	7426	7933
323	Lauroyl-L-carnitine	0.0065055	0.0176718	18	9	47428.5	0.0523761	0.180403	20	5.99999	150510	0.00306128	0.00929407	19	7.59999	76301.9	57284.6	0.750762	29687	35337	21343	11671	182208	151865	150157	117812	35043	51177	52550	23700	81370	39709	37252	19776	65041.1
324	Leu-Ala-Lys	0.0065055	0.0176718	24	6	592.202	0.0633311	0.193348	20	5.99999	2427.5	0.00362333	0.0105295	22	6.05	1452.57	814.254	0.560561	1764	1682	1200	808	3221	2849	1592	2048	686	1224	927	960	788	666	769	1249	1402.06
327	Leu-Gln	0.000320124	0.00217263	18	6	12905.2	0.0305519	0.161456	20	6.00001	32926.2	0.000122599	0.000953055	19	6.01667	20414	12409.7	0.607903	15787	16919	14089	13338	31096	32145	32159	36305	9364	11150	11962	13047	21701	14780	12774	15947	18910.2
328	Leu-Gly-Ile	0.00267199	0.00936821	24	3	941.513	0.0411573	0.168087	21.5648	6.63e-05	5306.25	0.0011124	0.00435505	22.7824	1.42393	4405.75	1186.38	0.26928	5036	5492	5750	4947	5190	4935	4108	5137	2625	3755	3234	3445	5141	4377	3738	4116	4439.12
330	Leu-His	0.00421867	0.0128369	18	6	3740.06	0.0430908	0.168276	20	6	13530	0.00174745	0.00614161	19	6.01667	9897.67	3038.2	0.306962	9979	12376	10000	7978	12144	16166	12047	13763	5000	5342	6317	6705	10554	7054	6655	10392	9529.5
331	Leu-Ile	0.000987235	0.00460639	24	3	4869.84	0.0368993	0.166866	21.5648	6.63e-05	22301.5	0.000408732	0.00218226	22.7824	1.42393	17463.4	6636.33	0.380014	20478	23488	22365	22875	15427	20324	18527	21665	10086	11919	11309	12475	22632	18846	14245	15740	17650.1
335	Leu-Met	0.00421867	0.0128369	18	6	6539.68	0.0222127	0.159709	20	6	14853.5	0.000962882	0.00394072	19	6.01667	7988.64	6655.5	0.83312	6246	7015	4721	4377	13912	16786	12590	16126	2439	3151	3414	3547	6589	3000	4362	6639	7182.12
338	Leu-Ser	0.000987235	0.00460639	18	6	15179.5	0.0221652	0.159709	20	6.00001	35297.5	0.000256676	0.00156978	19	6.01667	20130.1	15114.9	0.750862	13780	15702	12862	11759	33875	39464	35344	32507	7722	9629	11602	12005	17662	14204	11107	13551	18298.4
339	Leu-Trp	0.000987235	0.00460639	18	6	5718.02	0.0277589	0.160845	20	6	17357.5	0.000315284	0.00180989	19	6.01667	11777	4894.38	0.415589	11061	12692	11634	9758	14354	17808	17511	19757	4767	5757	6141	5966	13209	11053	7479	9995	11183.9
340	Leu-Tyr	0.0144977	0.0319142	18	6	2165.51	0.0951214	0.235897	20	6.00001	7130.5	0.0104619	0.0237921	19	6.01667	4108.5	2923.81	0.71165	3519	4246	2404	2045	7884	9412	4001	7225	1543	2081	2014	1752	3307	1435	2328	4871	3754.19
341	Leu-Tyr	0.0144977	0.0319142	18	6	1947.73	0.0955215	0.236565	20	5.99997	5806.25	0.0105001	0.0238664	19	6.01665	3371.66	2332.1	0.691676	3089	3387	2164	1729	6921	6845	3271	6188	1115	1672	1582	1546	2597	1219	1639	4461	3089.06
347	L-Propionylcarnitine	0.0144977	0.0319142	18	6	1934.82	0.0543919	0.181681	20	5.99999	4236.5	0.00642305	0.0161321	19	6.01666	2460.21	1908.02	0.775552	1269	1480	1278	1022	4026	3992	4358	4570	993	1437	2926	1315	1783	2106	1787	1322	2229
359	Lys-Tyr	0.0144977	0.0319142	18	6	1188.82	0.0773951	0.211033	20	6	4059.75	0.0087437	0.020621	19	6.01667	2530.42	1497.11	0.591647	2290	2613	1651	1232	4383	4798	2762	4296	1202	1615	1631	1377	2013	1126	1684	2911	2349
362	Maltose	2.22e-07	7.82e-06	18	9	435.578	0.0151045	0.159709	20	5.99999	4341.5	6.88e-08	3.76e-06	19	7.6	1757.93	2037.94	1.15929	145	206	162	123	4412	4343	4326	4285	510	718	655	660	301	278	329	264	1357.31
363	Maltose B	2.22e-07	7.82e-06	18	9	18560.8	0.0154242	0.159709	20	5.99999	107410	7.02e-08	3.76e-06	19	7.6	42513.9	51244.7	1.20536	2181	2302	2279	2331	99368	114222	109299	106749	13245	15258	14934	14178	4896	5575	6328	5901	32440.4
364	Maltotetraose	8.88e-07	2.07e-05	18	9	782.59	0.0285246	0.160845	20	6.00002	2374.75	4.68e-07	1.2e-05	19	7.60001	1594.57	896.315	0.562104	748	740	463	824	2346	2554	2749	1850	1464	1496	1775	1860	934	897	1081	913	1418.38
365	Maltotriose	2.22e-07	7.82e-06	18	9	4618.11	0.0163768	0.159709	20	6	17850.8	7.43e-08	3.76e-06	19	7.6	6700.97	8558.81	1.27725	209	209	264	225	19279	19994	14573	17557	1505	2129	1295	1247	315	288	403	804	5018.5
370	Met-Asn	0.000572095	0.00320048	18	6	511.061	0.0338275	0.166163	20	6	1353	0.00022938	0.0014802	19	6.01667	867.51	475.612	0.54825	639	855	664	550	1262	1296	1385	1469	401	509	602	496	904	604	555	767	809.875
372	Met-Gln	0.000987235	0.00460639	18	6	5429.87	0.021249	0.159709	20	6	13049.2	0.000246951	0.00153306	19	6.01667	8223.27	4476.42	0.54436	7509	9516	6521	5100	13233	12258	13440	13266	3536	4569	4462	4577	7966	5256	4728	6956	7680.81
377	Met-His	0.00164724	0.00666594	18	6	776.226	0.0242401	0.159709	20	6	2529.75	0.00044435	0.00228508	19	6.01667	1790.07	658.713	0.367981	1753	2076	1586	1399	2436	2685	2745	2253	1015	1075	1074	1088	1869	1613	1376	1321	1710.25
381	Methylacetate	7.77e-06	0.000124608	18	9	20611.6	0.0501338	0.177777	20	6	82017.2	6.14e-06	9.43e-05	19	7.6	57822	21945	0.379527	33753	43324	35342	29979	81357	95466	74479	76767	48328	55957	52315	46022	48302	45709	42601	46429	53508.1
384	Met-Ile	0.00164724	0.00666594	18	6	18997.1	0.016678	0.159709	20	6	42801.2	0.000316	0.00180989	19	6.01667	24725.6	16753.5	0.677577	22539	24059	18187	18281	45100	45258	37967	42880	7925	10425	10729	10156	22566	12578	12687	21790	22695.4
386	Met-Ser	0.000320124	0.00217263	18	6	586.192	0.0311193	0.161527	20	5.99998	1517	0.000124692	0.000964138	19	6.01666	957.456	539.125	0.563081	808	986	645	624	1400	1541	1419	1708	439	520	590	501	922	649	611	911	892.125
388	Met-Trp	0.0065055	0.0176718	18	6	827.668	0.0269631	0.160754	20	6	2707	0.00169241	0.00599683	19	6.01667	1926.13	625.167	0.324571	2280	2398	1939	1590	2592	2366	2784	3086	862	976	1126	945	2228	1368	1264	1802	1850.38
389	Met-Val	0.00421867	0.0128369	18	6	3302.01	0.0514228	0.179456	20	6	10503.2	0.00204699	0.00688157	19	6.01667	7110.72	3071.09	0.431896	7044	8360	5714	5175	8492	11994	9147	12380	3500	3583	4465	4416	7620	4303	4785	6839	6738.56
393	Myristoyl-L-carnitine	0.0419656	0.0724237	18	6	79504.4	0.082423	0.218818	20	6	185306	0.02306	0.0458026	19	6.01667	106697	82263.7	0.771003	75482	80250	46195	35798	174608	206054	173057	187507	61483	67809	74062	36353	142345	68648	73871	44131	96728.3
396	N,N'-Diacetylcystine	0.0499351	0.0858693	18	6	36.5928	0.294711	0.490397	20	6.00001	195	0.0768019	0.125776	19	6.01667	162.279	26.0281	0.160391	149	135	156	233	169	172	222	217	98	120	115	160	172	141	122	165	159.125
402	N-.alpha.-Acetyl-L-ornithine	8.77e-05	0.00082364	18	9	974.216	0.0185889	0.159709	20	6	3636.5	2.34e-05	0.000270379	19	7.6	2359.53	1239.48	0.525308	1632	1177	1204	1136	3748	3772	3702	3324	2149	2524	2157	1745	1558	1597	1286	1143	2115.88
404	N.epsilon.-Acetyl-L-lysine	0.000171384	0.00137171	24	21	466.867	0.0323428	0.164896	21.5648	17.9999	3278.75	7.26e-05	0.000635332	22.7824	19.4754	2848.78	480.501	0.168669	2842	2944	3290	3442	2259	2489	2325	2170	2610	2881	2906	2730	3125	3403	3536	3051	2875.19
405	N.epsilon.-Dimethyl-L-lysine	0.0144977	0.0319142	18	0	9454.02	0.0986759	0.240851	24.1644	17.9999	71638.7	0.0108004	0.0244335	21.0822	18.3931	65598.7	9191.33	0.140114	73832	76485	78990	71543	56578	55371	62005	63052	52317	62758	65690	63116	78142	76335	72218	59860	66768.2
407	N2-(1-Oxo-4-phenylbutyl)-L-glutamine	8.88e-07	2.07e-05	18	0	3374.31	0.0692878	0.200278	25.4179	17.9999	12481	1.08e-06	2.36e-05	21.7089	18.5412	11718.4	3005.49	0.256475	16249	16782	13635	15734	8324	9980	9288	9650	10160	10972	10952	10606	14257	12718	11593	11356	12016
408	N2,N2-Dimethylguanosine	0.000987235	0.00460639	18	9	294.156	0.0152573	0.159709	20	6	2275.25	0.000182307	0.001253	19	7.6	878.109	1028.77	1.17158	150	121	102	109	2467	2179	2380	2075	169	179	177	148	190	138	118	112	675.875
418	N-Acetylmethionine	0.00421867	0.0128369	24	9	18730.2	0.120111	0.26712	22.6735	6.00002	81360.2	0.00435141	0.0120026	23.3368	7.46341	62112.9	20212	0.325407	54410	59476	48447	36771	74896	90146	79461	80938	55220	81716	65447	68930	54000	27857	36501	70457	61542.1
419	N-Acetylneuraminic acid	7.77e-06	0.000124608	18	9	812.466	0.0366525	0.166866	20	6	2618	4.58e-06	7.71e-05	19	7.6	1771.73	897.739	0.506703	1003	1095	763	652	3041	2613	2538	2280	1734	1783	1606	1758	1432	653	1426	1147	1595.25
438	Norharmane	0.0299489	0.0559443	18	6	75.3069	0.113647	0.259021	20	6	277.25	0.0227461	0.045283	19	6.01667	172.242	106.698	0.619466	137	135	107	101	205	287	389	228	136	95	96	105	122	120	199	87	159.312
439	Octadecanedioic acid	0.000572095	0.00320048	18	6	3424.87	0.0449731	0.169358	20	6	10189.5	0.000297629	0.00173593	19	6.01667	6857.07	3268.97	0.47673	6320	6254	5247	4290	11784	10416	9365	9193	4071	4381	4565	4215	7201	6459	5100	4514	6460.94
441	Oleic acid	7.77e-06	0.000124608	18	6	30083.5	0.0406266	0.167576	20	6.00001	64010.5	5.04e-06	8.17e-05	19	6.01667	31647.6	32591.2	1.02982	14485	16276	18861	14996	61049	49955	80473	64565	7194	11832	10814	7118	17091	33312	16682	18468	27698.2
442	Oleoyl-L-carnitine	0.0210199	0.0421957	18	6	10076.3	0.0570054	0.185171	20	6	31123	0.00925872	0.021647	19	6.01667	21267.6	9989.22	0.469693	17270	18997	14675	14672	31368	29562	29132	34430	11044	15202	20290	13215	23283	16150	17369	14254	20057.1
445	Orthanilic acid	0.00980952	0.0239973	18	6	508.763	0.0511633	0.179456	20	6	1355	0.0043148	0.0119687	19	6.01667	790.388	577.248	0.730334	486	626	455	428	1713	1382	1183	1142	288	502	417	615	529	357	672	732	720.438
448	Palmitic acid	0.00164724	0.00666594	18	6	4459.72	0.341322	0.546165	20	6	15277.2	0.0047698	0.0128441	19	6.01667	10969.2	4613.37	0.420574	7445	8550	8070	7418	13404	14201	17936	15568	6175	7913	9937	6099	14865	10770	8470	9742	10410.2
454	Phe-Ala b	0.00421867	0.0128369	18	6	2387.19	0.0290639	0.160845	20	6.00001	6054.75	0.00122691	0.00468475	19	6.01667	3095.32	2937.87	0.949132	2024	2433	1452	1502	6464	7458	4531	5766	927	1271	1363	1262	2466	1260	1304	2346	2739.31
455	Phe-Asn	0.0144977	0.0319142	18	9	1077.63	0.065877	0.196625	20	6	4305.25	0.00759635	0.0184477	19	7.6	2649.14	1187.56	0.448281	1444	1544	1604	1547	3761	3813	4798	4849	1191	1936	1978	1715	2385	2632	1569	1885	2415.69
459	Phe-His	0.000572095	0.00320048	18	6	4166.8	0.0345551	0.166866	20	6.00001	9977	0.000233893	0.00149154	19	6.01667	5926.8	4028.51	0.679711	4612	5308	3920	2722	10293	10421	8827	10367	2120	3347	3127	3310	4990	4091	3753	5810	5438.62
460	Phe-Ile	0.000987235	0.00460639	18	6	8318.05	0.028757	0.160845	20	5.99999	22184.2	0.000325617	0.00186251	19	6.01666	14672.1	7001.5	0.477197	13412	16022	11763	10047	21055	21870	20989	24823	5987	8562	8930	8419	14977	11643	9498	13182	13823.7
461	Phe-Leu	0.00164724	0.00666594	18	6	25512.4	0.0364207	0.166866	20	6	72571.5	0.000643209	0.00297553	19	6.01667	41160.4	30706.4	0.746017	32552	35241	25847	23406	68266	84262	54928	82830	14280	20679	21075	18947	33947	19617	21518	41636	37439.4
463	Phe-Met	0.00164724	0.00666594	18	6	3225.11	0.0336475	0.166163	20	5.99999	8145.75	0.000598623	0.00281437	19	6.01666	4240.71	3788.95	0.893471	3284	3719	2361	2025	9212	9492	5938	7941	1018	1563	1466	1419	3219	1481	2008	4359	3781.56
468	Phe-Phe	0.00421867	0.0128369	18	6	3195.42	0.0716255	0.202962	20	6	11194.2	0.00275107	0.00854382	19	6.01667	6048.77	5030.91	0.831724	4793	4927	3663	3039	13258	14459	5718	11342	1717	3017	2466	2531	3906	2660	3016	6514	5439.12
471	Phe-Trp	0.000987235	0.00460639	18	6	2557.25	0.0254517	0.159709	20	6	7703.75	0.000291259	0.00170888	19	6.01667	5245.88	2205.46	0.420417	5120	5760	4506	4296	7392	7341	7384	8698	2315	3013	3374	3131	5802	3453	3382	4691	4978.62
472	Phe-Tyr	0.00164724	0.00666594	18	6	2484.07	0.0585407	0.187364	20	6.00001	8271.25	0.000988095	0.00401702	19	6.01667	4333.72	3872.57	0.893591	3306	3658	2259	1884	9314	10818	4748	8205	1250	1867	1756	1635	2911	1668	2028	4524	3864.44
473	Phe-Val	0.000987235	0.00460639	18	6	6418.05	0.0265228	0.159895	20	6.00001	15264.2	0.000302437	0.00175308	19	6.01667	7405.84	7777.87	1.05024	4663	5637	3504	2912	15808	18492	11127	15630	1707	2446	2808	2368	4877	2676	2812	5946	6463.31
475	Physanguloside A	8.88e-07	2.07e-05	18	9	2399.57	0.0182498	0.159709	20	6	9101	3.07e-07	8.46e-06	19	7.6	3189.51	4335.15	1.35919	22	31	24	6	10291	7631	10897	7585	199	237	145	73	92	65	59	40	2337.31
478	Pramipexole	0.000171384	0.00137171	18	9	1061.72	0.0511515	0.179456	20	5.99999	3979	0.000110849	0.000879079	19	7.6	1743.38	1773.15	1.01708	477	266	221	588	1745	5671	4816	3684	781	796	663	941	581	423	379	285	1394.81
489	Pro-Leu	0.00421867	0.0128369	24	9	3186.22	0.0150819	0.159709	20	6	27817	0.000678406	0.00308885	22	7.425	13237.9	10194.8	0.770124	7455	7060	6711	5674	26501	27143	29247	28377	7376	8549	10110	7038	8940	6294	5811	5830	12382.2
504	Pyridoxamine	0.0144977	0.0319142	18	9	251.907	0.0852512	0.222372	20	5.99999	1768.25	0.00951176	0.0220836	19	7.59999	1414.01	305.601	0.216123	1107	1097	1100	1328	1455	1943	1935	1740	1188	1312	1221	1468	1342	1325	1150	952	1353.94
518	Ribose-5-phosphate	0.0210199	0.0421957	18	0	344.361	0.493471	0.713938	20	17.9999	1056.25	0.0577612	0.098739	19	18.05	958.301	289.717	0.302323	1513	1476	1520	1099	1136	647	496	386	1103	1132	795	812	1371	824	1047	983	1021.25
520	S-Adenosyl-methionine	0.0144977	0.0319142	24	15	455.73	0.0976243	0.239362	21.1511	12	3111.5	0.0107005	0.0242454	22.5755	13.4589	2587.33	608.168	0.235056	2217	2626	2133	1873	2567	1905	2277	2403	2491	3211	3286	3458	2715	2557	2922	2547	2574.25
521	Salicylic acid	0.00421867	0.0128369	18	9	20843.7	0.0351241	0.166866	20	6	68551.2	0.00145467	0.00532886	19	7.6	35194.7	25385.4	0.721284	15168	19961	12299	12828	49657	69698	63830	91020	14459	16306	21727	24386	21877	15905	16076	18075	30204.5
523	Ser-Ala	0.0144977	0.0319142	18	6	1146.57	0.20315	0.376263	20	6	7437.25	0.0201086	0.0410903	19	6.01667	6265.46	1078.64	0.172157	5383	6482	5725	6358	6310	7357	8200	7882	4469	4960	5267	5301	7196	6932	5151	5183	6134.75
524	Ser-Arg	0.0144977	0.0319142	24	3	5607.71	0.147576	0.302702	21.0501	5.99998	38870.8	0.0152915	0.033007	22.5251	4.61801	35101.6	3595.07	0.102419	38733	46609	37521	32535	42856	35094	40068	37465	27923	31195	28201	28743	37275	36415	31807	27834	35017.1
536	Ser-Pro-Arg	0.0419656	0.0724237	24	3	607.758	0.302365	0.498758	22.4427	6.19e-05	5294	0.0681018	0.113233	23.2214	1.45137	4718.51	777.626	0.164803	5542	5473	5167	4994	5168	4446	5343	4327	3693	4308	4247	3974	4602	5945	4625	3847	4731.31
540	Ser-Tyr	0.00267199	0.00936821	18	6	2016.49	0.148835	0.303615	20	6	9938.5	0.00351151	0.0102805	19	6.01667	8205.49	1473.45	0.179569	8708	9299	7615	6888	8865	10634	9360	10895	5054	5371	6520	6065	10326	7184	6539	9108	8026.94
542	Sibutramine	0.00980952	0.0239973	18	6	507.349	0.0237455	0.159709	20	6.00002	1624	0.00218135	0.00719301	19	6.01667	1026.89	556.082	0.541522	973	941	894	766	1886	1328	1900	1382	564	673	491	575	918	648	688	725	959.5
544	Stanozolol	0.00980952	0.0239973	18	6	1720.04	0.0252993	0.159709	20	6	3980.5	0.00230836	0.00752084	19	6.01667	1834.56	2197.1	1.19762	714	812	619	806	5085	3991	3789	3057	779	630	727	676	1022	960	773	653	1568.31
545	Stearoyl-L-carnitine	0.0144977	0.0319142	18	6	1769.53	0.95846	1	20	5.99998	13535.5	0.0733153	0.120614	19	6.01666	12402.6	1181.76	0.0952826	11919	13067	10504	10625	14811	13216	13548	12567	8571	9913	12733	10549	16124	13064	13106	11834	12259.4
547	Succinic acid	4.22e-05	0.000465917	18	9	119972	0.0432575	0.168276	20	6	490603	2.59e-05	0.000294749	19	7.6	338565	135464	0.400113	198645	242199	200301	176567	472591	564650	473432	451739	271647	325414	306026	259080	279716	263955	235664	269352	311936
551	Tetrasaccharide 02	2.22e-07	7.82e-06	18	9	2960.66	0.0254819	0.159709	20	6	7966.75	1.13e-07	4.19e-06	19	7.6	5004.14	3306.03	0.660659	1937	1474	1449	2003	6935	8979	9151	6802	4410	4575	5550	5747	2517	2457	3181	2501	4354.25
553	Thiazolidine-4-carboxylic acid	0.00164724	0.00666594	24	0	1266.61	0.0383366	0.167576	23.2718	7.08e-05	6190.99	0.000673807	0.00308305	23.6359	3.6e-05	4607.62	1777.66	0.385809	6123	6731	5538	6372	3746	4936	4609	4702	2037	2850	2909	3795	6527	4217	4817	4165	4629.62
554	Thr-Ala	0.00267199	0.00936821	18	6	671.398	0.19138	0.360331	20	6	3368.25	0.00438672	0.012083	19	6.01667	2827.51	476.643	0.168573	2990	3187	2572	2233	2712	3729	3446	3586	1905	1907	2227	2247	3375	2744	2623	2833	2769.75
558	Thr-Gln	0.00980952	0.0239973	18	6	944.341	0.281229	0.475487	20	6	6138	0.0190158	0.0391716	19	6.01667	5051.82	1021.78	0.20226	4576	4950	4811	4512	4496	5907	7152	6997	3430	3946	4295	3727	5745	5489	4285	4530	4928
564	Thr-Phe	0.00164724	0.00666594	18	6	2903.56	0.0414248	0.168276	20	6	7638	0.000722799	0.00323318	19	6.01667	4791.28	2598.64	0.542368	4939	5274	3867	2987	7892	8626	5749	8285	1715	2264	2326	2446	4567	2427	2916	5342	4476.38
565	Thr-Pro-Lys	0.0419656	0.0724237	24	6	227.335	0.0607285	0.189448	20	6	2796.25	0.0177688	0.0370669	22	6.05	2355.44	410.059	0.174091	2102	2397	1982	2315	3102	2753	2589	2741	2088	2319	2093	2192	2070	2411	2036	2090	2330
570	Thr-Val-Ile	0.00164724	0.00666594	18	6	2461.09	0.028355	0.160845	20	6.00001	9541.75	0.000512456	0.00254174	19	6.01667	7427.07	1598.36	0.215208	7967	7837	8675	7667	9387	9343	9956	9481	3050	4535	4792	5493	8682	7841	5656	5372	7233.38
571	Thr-Val-Leu	0.00164724	0.00666594	24	0	1606.37	0.0765483	0.209384	26.4865	6.63e-05	7042.48	0.00125822	0.00477904	25.2432	3.16e-05	4649.31	1960.51	0.421677	7910	7166	6670	6424	4411	4024	2289	3668	2450	3543	3525	3566	5336	2541	4032	5730	4580.31
573	Tiliroside	0.0254844	0.0510159	24	6	8.83883	0.965108	1	20	6	1041.75	0.115725	0.177818	22	6.05	310.278	688.618	2.21936	8	17	11	10	48	34	35	4050	11	9	5	5	9	9	16	4	267.562
576	trans-Traumatic acid	0.000320124	0.00217263	24	21	4601.32	0.0268109	0.160569	23.9024	17.9999	10999.2	0.000108708	0.000868459	23.9512	19.497	8127.17	4642.09	0.571181	13790	12412	11807	7633	4875	4295	5085	3767	5491	6205	5527	5306	12436	12507	10332	8722	8136.88
577	Trehalose	2.22e-07	7.82e-06	18	9	38573.4	0.0155079	0.159709	20	5.99999	216808	7.05e-08	3.76e-06	19	7.6	85518.4	103519	1.21048	4166	4175	4458	4468	200985	233487	220410	212351	25334	30183	30506	27690	8796	10978	13018	11698	65168.9
580	Trisaccharide 01	2.89e-06	5.71e-05	18	9	516.542	0.0170138	0.159709	20	5.99999	2151.5	8.75e-07	2.02e-05	19	7.6	915.005	970.377	1.06052	151	195	191	115	1862	1983	2301	2460	414	442	368	265	220	216	220	185	724.25
584	Trisaccharide 05	2.22e-07	7.82e-06	18	9	14877.2	0.0168338	0.159709	20	6	55675.2	7.63e-08	3.76e-06	19	7.6	20754	26694.9	1.28625	648	611	645	438	62275	61680	44677	54069	4198	5785	3978	3775	801	763	1233	2526	15506.4
585	Trp-Ala	0.0144977	0.0319142	18	6	361.332	0.034926	0.166866	20	6.00001	973.75	0.00434866	0.0120026	19	6.01667	481.169	489.308	1.01691	307	392	198	205	994	1299	663	939	149	171	204	199	277	177	177	399	421.875
586	Trp-Leu	0.000987235	0.00460639	18	6	8446.39	0.0514468	0.179456	20	6.00001	25760.2	0.000552993	0.00267239	19	6.01667	13326.9	12344.2	0.926261	9086	10843	6201	6002	26214	33528	15966	27333	3636	5371	5713	5114	9718	5402	5903	13266	11831
588	Trp-Phe	0.00421867	0.0128369	18	6	729.381	0.054381	0.181681	20	6.00001	2456.5	0.00215191	0.00712913	19	6.01667	1289.42	1144.86	0.887884	987	1012	689	667	2758	3280	1425	2363	427	559	486	487	935	464	634	1238	1150.69
589	Trp-Trp	1.91e-05	0.00025515	18	6	542.351	0.0474971	0.173457	20	6	1378	1.35e-05	0.000177986	19	6.01667	789.463	585.08	0.741111	495	580	560	471	1171	1615	1134	1592	279	283	369	400	727	690	459	672	718.562
590	Trp-Val	0.000572095	0.00320048	18	6	1080.11	0.0359316	0.166866	20	6	2999.75	0.000242406	0.00152783	19	6.01667	1342.08	1666.05	1.24139	702	764	437	428	3375	3855	1853	2916	290	339	366	348	731	393	413	1033	1140.19
592	Tyr-Arg	0.00980952	0.0239973	18	6	6443.86	0.0636748	0.193618	20	6.00001	20315	0.00523329	0.0136343	19	6.01667	11636.3	8589.51	0.738164	9543	10525	7524	4536	23943	23930	12996	20391	4815	6543	6573	5166	8398	4872	6984	12788	10595.4
594	Tyr-His	0.00164724	0.00666594	18	6	644.528	0.0433216	0.168276	20	6	1786.5	0.0007527	0.00333785	19	6.01667	1218.14	554.051	0.454833	1098	1320	887	704	1652	1861	1800	1833	677	819	837	766	1199	826	974	1163	1151
596	Tyr-Met	0.000987235	0.00460639	18	6	526.441	0.0455179	0.170495	20	6	1556	0.000494766	0.00248243	19	6.01667	814.536	728.553	0.894439	626	724	404	333	1731	1935	993	1565	271	336	294	269	559	330	450	800	726.25
599	Tyr-Tyr	0.00267199	0.00936821	18	6	253.498	0.0647709	0.195305	20	6.00001	923.75	0.00167215	0.00593963	19	6.01667	540.584	377.713	0.698713	428	461	343	308	1005	1164	568	958	261	236	326	260	430	255	345	569	494.812
600	Tyr-Tyr-Tyr	0.00421867	0.0128369	18	6	789.838	0.0796967	0.21462	20	6	4343.25	0.00302518	0.00922465	19	6.01667	3538.95	771.176	0.217911	3260	3630	3156	3040	4428	4687	3973	4285	2530	2578	2912	3450	3737	3171	3467	2824	3445.5
601	Tyr-Val	0.00980952	0.0239973	18	6	2288.2	0.0288872	0.160845	20	6.00001	5909	0.00259814	0.00819371	19	6.01667	3226.11	2659.64	0.824411	2370	2736	1834	1491	6196	6969	4698	5773	1171	1505	1705	1549	2752	1396	1651	2665	2903.81
602	unknown1	8.77e-05	0.00082364	18	6	718.774	0.126651	0.276132	20	5.99998	3351.75	0.000137804	0.00104499	19	6.01666	2666.63	651.932	0.244478	2581	2596	2267	2270	2771	3291	3608	3737	1825	2028	2227	1605	2902	2776	2674	2244	2587.62
606	unknown1001	0.0299489	0.0559443	18	6	1020	0.0785966	0.212354	20	6.00001	4905.75	0.0165989	0.0352146	19	6.01667	3841.94	1021.21	0.265807	3403	3488	3422	3708	4797	5303	4963	4560	2445	3006	3046	3851	3940	4098	2775	2686	3718.19
608	unknown1003	0.0144977	0.0319142	18	6	631.623	0.0799911	0.214971	20	6	3209	0.00899873	0.021151	19	6.01667	2558.81	559.616	0.218701	2488	2586	2809	2314	3056	3384	3446	2950	1557	1829	1885	2372	2797	2789	1884	1710	2491
609	unknown1004	0.000320124	0.00217263	24	0	1894.34	0.0273533	0.160845	25.7143	6.63e-05	7247.73	0.000110732	0.000879079	24.8571	3.21e-05	4763.24	2266.88	0.475911	7247	7895	7333	6516	3965	3858	2760	3525	2821	3596	3296	3112	5837	3542	5173	4813	4705.56
611	unknown1006	0.0210199	0.0421957	24	6	1031.85	0.054397	0.181681	20	6.00001	4727.5	0.00888862	0.0209059	22	6.05	3691.41	535.637	0.145103	3875	4039	3892	4092	4311	5019	4796	4784	2187	2513	2636	2718	4771	3785	2664	2449	3658.19
613	unknown1008	0.00164724	0.00666594	24	3	610.233	0.0447433	0.169204	21.995	4.71e-05	5527.25	0.000775021	0.00339771	22.9975	1.43737	4669.3	1289.88	0.276246	5436	5520	5706	5447	4667	4895	4361	4716	3135	3605	3920	3887	6147	4633	4461	4631	4697.94
616	unknown1010	0.000987235	0.00460639	24	0	1308.85	0.048289	0.174826	24.9858	6.63e-05	4795.24	0.00052207	0.00258055	24.4929	3.25e-05	3298.5	1583.76	0.480147	5459	5312	4423	3987	2587	2698	2575	2487	1751	2246	2291	2317	4171	2106	3397	4582	3274.31
617	unknown1011	0.0210199	0.0421957	24	0	701.803	0.16066	0.319892	25.7143	6.63e-05	6120.24	0.022595	0.0450994	24.8571	3.21e-05	5057.62	952.811	0.188391	5724	6069	6577	6111	5422	5002	4473	4715	3050	4114	4508	5145	5863	4541	3844	5376	5033.38
618	unknown1012	0.00164724	0.00666594	24	0	1473.79	0.0470088	0.173183	25.4179	6.63e-05	7459.74	0.000810438	0.0035092	24.7089	3.22e-05	5800.57	1654.99	0.285315	6962	7551	8158	7168	4891	5232	4646	5060	4030	4700	4875	4996	7183	4721	5433	6636	5765.12
619	unknown1013	0.0065055	0.0176718	24	0	1744.79	0.0872421	0.225124	26.0177	6.63e-05	7768.23	0.00480955	0.0129189	25.0088	3.19e-05	5626.68	1915.13	0.340366	8462	8090	7256	7265	5239	5391	3866	4513	3454	4750	4313	4365	7081	3285	5192	6604	5570.38
622	unknown1016	0.000572095	0.00320048	24	3	949.291	0.0341192	0.166163	21.995	6.63e-05	5463.25	0.00023119	0.00148168	22.9975	1.43738	4405.43	1427.76	0.324091	5270	5490	5651	5442	4594	4642	5022	4558	2471	3056	3459	3552	5436	4795	3500	4056	4437.12
625	unknown1019	0.00421867	0.0128369	18	0	2833.73	0.053885	0.181591	25.7143	6.63e-05	8289.73	0.00213437	0.00708185	21.8571	2.82e-05	5345.56	2007.2	0.375489	8789	8081	8412	7877	5600	4016	3437	3763	2729	4224	4652	3919	7983	4386	4900	5486	5515.88
626	unknown102	0.00421867	0.0128369	18	6	1423.58	0.142231	0.295803	20	6	7592.5	0.00505135	0.013323	19	6.01667	6019.39	1421.58	0.236166	5572	5404	6570	5535	9824	6884	7801	5861	3882	5000	3781	5413	5505	5547	5142	5833	5847.12
630	unknown1023	4.22e-05	0.000465917	24	0	1657.46	0.0258088	0.159709	25.4179	6.63e-05	6598.73	1.6e-05	0.000203624	24.7089	3.22e-05	4676.75	1867.19	0.399249	6478	6802	6622	6493	3929	3793	3504	3497	2640	3648	3461	3833	5992	3956	4365	5175	4636.75
634	unknown1027	0.000320124	0.00217263	18	6	1266.61	0.0763426	0.208995	20	5.99998	5233.25	0.000283966	0.00168489	19	6.01666	3599.34	1561.44	0.433814	3062	3136	2959	3076	4047	5572	6458	4856	1492	2287	2434	2330	4072	3091	2316	3374	3410.12
635	unknown1028	0.00267199	0.00936821	18	6	2323.2	0.0403853	0.167576	20	5.99999	6775.75	0.00109358	0.00431648	19	6.01666	4417.11	2199.1	0.497859	3779	4257	3880	3398	7288	6631	6611	6573	1392	2429	2476	2922	4962	2655	2339	4818	4150.62
637	unknown103	0.0210199	0.0421957	24	3	4403.68	0.110207	0.255185	20	6	35332.8	0.0163725	0.0348694	22	4.675	27074.9	10277.6	0.379601	25268	27347	30096	25619	45418	29933	38816	27164	16005	23336	18381	23119	23707	24419	22723	26800	26759.4
640	unknown1032	0.000572095	0.00320048	24	3	888.656	0.0431045	0.168276	25.5652	5.65e-05	5043.74	0.000286309	0.00168899	24.7826	1.54894	3892.92	1182.91	0.303861	5500	5186	4906	4583	4069	4234	3307	4012	2449	3151	2784	3342	4535	2897	3242	3877	3879.62
641	unknown1033	0.0299489	0.0559443	24	6	720.542	0.109894	0.254899	20	5.99998	5553.25	0.0221054	0.0443902	22	6.04999	4534.37	870.527	0.191984	4106	4558	4489	4485	5647	5399	5210	5957	3300	4126	3829	4911	4940	4231	3011	3487	4480.38
643	unknown1035	0.000572095	0.00320048	24	0	1041.75	0.0380324	0.167576	23.7736	6.63e-05	5257.99	0.000255343	0.00156606	23.8868	3.33e-05	4324.5	1267.74	0.293152	5053	5187	5553	5239	3695	4084	4181	3730	2859	3178	3666	3618	5676	5314	4237	3998	4329.25
644	unknown1036	0.00164724	0.00666594	24	0	1913.43	0.0437826	0.168276	25.4179	6.63e-05	8508.98	0.000759946	0.00335969	24.7089	3.22e-05	6236.62	2258.39	0.362117	8704	8739	8601	7992	5619	6512	3815	4993	3700	4544	5062	5033	7719	4885	6114	6980	6188.25
645	unknown1037	8.77e-05	0.00082364	24	18	1390.17	0.0173353	0.159709	27.4766	17.9999	5646.23	2.19e-05	0.000259926	25.7383	18.0825	3254.49	1742.02	0.535266	2328	2713	2310	2485	1539	1516	1589	2228	2037	2568	3148	3704	5916	5184	5475	6010	3171.88
648	unknown104	0.00164724	0.00666594	24	6	304.056	0.0148416	0.159709	20	6	44121.5	0.000284057	0.00168489	22	6.05	13148.9	29174.4	2.21877	517	477	462	589	45999	42844	48385	39258	432	295	508	275	443	356	469	118	11339.2
650	unknown1041	0.000987235	0.00460639	24	0	10684	0.0560381	0.183683	25.1282	6.63e-05	32060.9	0.000597614	0.00281299	24.5641	3.24e-05	19028.9	13403.6	0.704382	28654	23186	38913	37491	13474	9693	15143	13460	5240	9236	9246	13568	25550	30048	12614	15229	18796.6
651	unknown1042	0.00980952	0.0239973	18	6	1433.66	0.0432899	0.168276	20	6	6054.5	0.00372176	0.0107208	19	6.01667	4542.38	1335.37	0.29398	4046	4152	4714	4699	6708	6551	5287	5672	2371	3032	3145	3626	5345	3762	3471	3508	4380.56
652	unknown1043	0.000987235	0.00460639	24	3	1115.11	0.0789987	0.212992	20.5594	5.99997	6580.75	0.000815695	0.00352139	22.2797	4.64349	5456.01	1212.67	0.222262	6035	6000	6258	6076	8316	6693	5544	5770	3200	4091	3993	5136	5313	4273	4630	5446	5423.38
654	unknown1045	8.77e-05	0.00082364	24	0	641.346	0.0210909	0.159709	23.3952	4.8e-05	5185.25	2.63e-05	0.000296687	23.6976	2.43e-05	4264.55	937.92	0.219934	5477	5301	5020	4943	4238	4275	4633	4137	2766	3424	3458	3496	4796	4402	3688	4332	4274.12
655	unknown1046	0.000572095	0.00320048	24	0	1998.99	0.0610296	0.189557	23.1496	6.55e-05	12476.2	0.00039323	0.00212836	23.5748	3.34e-05	10396.6	2619.82	0.251989	12702	14072	11680	11451	9283	11092	9593	9854	6523	7797	8275	9689	13073	10484	9711	11676	10434.7
658	unknown1049	0.00164724	0.00666594	24	21	1181.58	0.101074	0.243816	22.5575	17.9999	7023.74	0.00161507	0.00577479	23.2788	19.4722	5943.16	1397.92	0.235215	6782	7390	6187	6937	2865	5679	4943	4729	6059	5410	5721	5007	7169	8303	6658	5965	5987.75
659	unknown105	0.00421867	0.0128369	24	6	353.2	0.0149808	0.159709	20	6	42426.8	0.000674284	0.00308305	22	6.05	12635.7	28055.9	2.22037	629	353	425	565	39648	44651	47123	38285	343	246	550	238	385	310	475	100	10895.4
661	unknown1051	0.00980952	0.0239973	18	9	1293.65	0.264169	0.454169	20	6	4685	0.0180245	0.0374501	19	7.6	3342.66	1234.08	0.369193	1770	2011	2020	2112	3266	5395	5071	5008	3242	2610	2909	3018	3859	3795	2048	1467	3100.06
665	unknown1055	0.000320124	0.00217263	18	9	2779.99	0.0896599	0.227699	20	6	9446.75	0.000328887	0.00187209	19	7.6	6279.93	2727.89	0.434383	3177	3423	3905	3324	7960	9996	9974	9857	3968	4801	5776	5901	7245	4014	4922	3656	5743.69
667	unknown1057	0.000320124	0.00217263	18	6	884.767	0.0393706	0.167576	20	6	3807.25	0.00015479	0.00113026	19	6.01667	2959.84	701.697	0.237072	2957	3055	3152	2807	3756	4422	3154	3897	1585	1832	1873	1882	3298	3079	2282	2966	2874.81
669	unknown1059	0.0299489	0.0559443	18	6	1105.92	0.0274796	0.160845	20	6	8756.5	0.0066683	0.0166419	19	6.01667	7645.58	716.052	0.0936557	7934	8174	8893	8300	8597	9482	8564	8383	5109	5502	5817	6096	9023	7254	7137	6676	7558.81
672	unknown1061	0.0210199	0.0421957	18	3	1017.88	0.12283	0.271216	23.9024	17.9999	16368	0.0179679	0.0373863	20.9512	20.1103	14950.3	1631.95	0.109159	16673	16645	16106	16491	11556	14563	15103	13984	14147	14183	14108	13786	17683	16933	16977	13879	15176.1
673	unknown1062	0.000987235	0.00460639	24	0	776.05	0.0392554	0.167576	25.7143	7.93e-05	5181.99	0.000432431	0.00225051	24.8571	3.83e-05	3990.15	1044.97	0.261887	5409	5142	5471	4706	4292	4190	3450	3694	2673	3293	2818	3232	4411	2778	3526	4332	3963.56
674	unknown1063	0.00980952	0.0239973	18	6	948.23	0.0453995	0.170317	20	6	7083.5	0.00388194	0.0110381	19	6.01667	6082.82	815.469	0.134061	6205	6430	6134	6046	6467	7749	7380	6738	4370	4874	5086	5390	6591	5981	5210	5093	5984
675	unknown1064	0.0065055	0.0176718	24	3	621.9	0.0160961	0.159709	20	6	4437	0.00106434	0.00423542	22	4.675	3897.82	613.312	0.157347	4195	4438	4005	4215	4347	4794	4301	4306	2884	3191	3079	3175	4048	3447	3683	3956	3879
676	unknown1065	0.000572095	0.00320048	18	6	804.334	0.0357443	0.166866	20	6	3997.75	0.00024125	0.00152721	19	6.01667	3121.31	864.901	0.277095	2684	2754	2808	2789	3627	4383	4085	3896	2258	2494	2558	2621	3171	2866	2596	2674	3016.5
677	unknown1066	0.00164724	0.00666594	18	6	1615.74	0.0347451	0.166866	20	6	7020.5	0.000616312	0.00287643	19	6.01667	5427.19	1411.15	0.260015	5134	5559	5365	4873	6270	7675	7133	7004	3291	3605	3812	3858	6272	4914	4386	4948	5256.19
678	unknown1067	0.00980952	0.0239973	24	3	1017.53	0.035758	0.166866	20.1831	6	5353.75	0.00314127	0.00943465	22.0915	4.6644	4686.72	701.034	0.149579	4765	5357	5763	5294	4897	5732	5438	5348	3361	3440	3523	3636	5558	4602	4055	3888	4666.06
679	unknown1068	8.88e-07	2.07e-05	18	0	5256.99	0.0174294	0.159709	24.7059	17.9999	9428.48	2.94e-07	8.37e-06	21.3529	18.455	7354.87	4438.82	0.603521	12243	12882	13365	11852	4760	4165	4107	3907	4724	5577	5588	4963	11016	7783	9700	9215	7865.44
681	unknown107	0.0419656	0.0724237	18	6	593.793	0.140798	0.294377	20	6	4067.5	0.036228	0.067301	19	6.01667	3373.91	692.452	0.205237	3292	3345	2789	2859	3245	4741	4124	4160	3214	3034	2721	2812	3404	2881	2940	3079	3290
682	unknown1070	0.0299489	0.0559443	18	6	498.157	0.0680009	0.19902	20	5.99998	3439	0.0146561	0.0318738	19	6.01666	2830.14	567.458	0.200505	2480	2820	2618	2853	2959	3768	3708	3321	2158	2504	2373	2449	3042	2633	2303	2193	2761.38
684	unknown1072	0.00980952	0.0239973	24	3	1115.46	0.0346549	0.166866	21.0501	5.99997	6092.25	0.00305502	0.00928298	22.5251	4.618	5376.3	694.2	0.129122	6044	6227	6159	5730	5352	6593	6263	6161	4202	4533	4498	3889	5970	5003	4680	4456	5360
685	unknown1073	8.77e-05	0.00082364	24	0	1981.31	0.0239434	0.159709	24.4321	6.21e-05	14872.7	2.95e-05	0.000322674	24.2161	3.08e-05	12177	2761.75	0.2268	14136	15040	15490	14825	10585	12045	12710	12103	8895	10179	9723	9706	14116	12976	11216	10782	12157.9
686	unknown1074	0.00267199	0.00936821	18	6	662.382	0.0342922	0.166163	20	6.00001	3231.5	0.00094357	0.00387634	19	6.01667	2584.24	517.207	0.200139	2566	2834	2857	2460	2885	3066	3570	3405	1530	1772	1814	1760	3037	2558	2031	2200	2521.56
687	unknown1075	0.000320124	0.00217263	24	0	630.739	0.0259858	0.159709	24.9858	6.63e-05	4720.74	0.000105623	0.000850085	24.4929	3.25e-05	3856.56	875.693	0.227066	4444	4980	4993	4466	3454	3844	3723	3634	2817	3118	3190	3299	4480	3989	3666	3394	3843.19
688	unknown1076	0.000320124	0.00217263	24	3	900.5	0.0422759	0.168276	23.1496	6.63e-05	6096.5	0.000165249	0.00117686	23.5748	1.47346	5270.08	966.707	0.183433	5861	6449	5891	6185	5198	6029	5504	5634	4163	4455	4514	4388	6091	4808	4527	4753	5278.12
689	unknown1077	0.0210199	0.0421957	24	3	654.604	0.0631863	0.193348	20.464	6.63e-05	4995.25	0.0101259	0.0231373	22.232	1.38954	4463.6	772.598	0.173089	4767	5224	4872	5118	4358	4887	5047	4746	3610	3671	3795	3727	5172	4904	4310	3768	4498.5
691	unknown1079	0.00980952	0.0239973	24	6	621.724	0.062067	0.191281	20	6.00001	4912.25	0.00511672	0.0134357	22	6.05001	3973.75	741.626	0.186631	3640	3946	3624	4137	4292	5194	5371	4792	3223	3340	3298	3553	4326	3902	3144	3062	3927.75
692	unknown108	0.00980952	0.0239973	24	6	313.602	0.0260163	0.159709	20	6	9163.25	0.00236665	0.00766461	22	6.05	2811.43	5940.53	2.11299	212	173	225	513	6457	8479	13205	8512	124	124	139	77	158	168	459	62	2442.94
693	unknown1080	0.00267199	0.00936821	18	6	1204.2	0.0181197	0.159709	20	6.00001	3441.5	0.00052946	0.00260811	19	6.01667	2248.22	1111.26	0.494282	1918	2297	1817	1843	3057	3670	3506	3533	1172	1294	1269	1327	2253	1543	1480	1838	2113.56
694	unknown1081	0.000987235	0.00460639	18	6	654.781	0.0590491	0.187903	20	6	3729.5	0.000626674	0.00291148	19	6.01667	3134.52	509.769	0.16263	3064	3484	3023	2870	3567	3708	3883	3760	2102	2338	2523	2611	3619	3175	2786	2651	3072.75
697	unknown1084	0.00164724	0.00666594	18	6	1073.03	0.047642	0.173532	20	6	5419.5	0.000820305	0.00352723	19	6.01667	4433.84	814.077	0.183606	4532	5202	4157	4115	5139	5274	5613	5652	2848	3262	3409	3338	5024	4682	3559	3557	4335.19
703	unknown109	0.00980952	0.0239973	18	6	6036.92	0.0202436	0.159709	20	6	10978.5	0.00189134	0.0064893	19	6.01667	3825.91	7267.85	1.89964	281	188	237	802	8673	11792	14243	9206	155	140	143	111	200	223	673	56	2945.19
713	unknown1099	0.0210199	0.0421957	24	0	550.483	0.324615	0.524667	24.9858	6.63e-05	6910.74	0.0408542	0.074296	24.4929	3.25e-05	6194.79	735.079	0.118661	7155	7564	6306	6618	6210	6591	5442	5725	5318	5353	5200	6484	7132	5556	5850	6433	6183.56
716	unknown1100	0.0144977	0.0319142	24	0	1062.07	0.0750208	0.207497	23.7736	6.63e-05	6706.24	0.00850936	0.0202128	23.8868	3.33e-05	5642.36	1321.94	0.23429	6381	6752	6724	6968	4925	5310	5407	5607	3771	4355	5087	4953	6829	7104	5129	5055	5647.31
718	unknown1102	0.0144977	0.0319142	24	3	1228.24	0.031826	0.163475	20.9501	6	6201	0.00400556	0.0112972	22.4751	4.62306	5379.67	818.148	0.152082	6225	6267	5983	5826	6575	6492	6284	5453	3924	4236	4056	4495	6110	4857	4642	4333	5359.88
719	unknown1103	0.0210199	0.0421957	18	0	2913.28	0.0608816	0.189557	24.5682	6.63e-05	17683.2	0.00980411	0.0225928	21.2841	2.87e-05	14638.1	2564.92	0.175222	16901	18570	17172	18090	13090	12844	12933	13182	11856	12260	13304	14579	18453	17278	15323	12950	14924.1
720	unknown1104	0.00267199	0.00936821	24	3	998.788	0.102735	0.246021	21.253	6.63e-05	7200.25	0.00252561	0.00803518	22.6265	1.41419	6476.64	900.068	0.138971	7504	7475	6888	6934	6764	7777	7405	6757	4925	5350	5145	6422	7349	6524	5490	5388	6506.06
722	unknown1106	0.00980952	0.0239973	18	6	3084.4	0.0260103	0.159709	20	6	15470.5	0.00236616	0.00766461	19	6.01667	12048	3022.58	0.250879	11884	12140	11557	11589	16374	16302	15323	13883	7398	8841	8888	11017	12384	10843	9193	9291	11681.7
723	unknown1107	0.0419656	0.0724237	18	9	556.139	0.540155	0.766341	20	5.99999	3343	0.108507	0.168279	19	7.6	2932.83	486.233	0.16579	2492	2664	1935	2151	2468	3797	3335	3772	2993	2997	3043	2785	3088	2248	3038	2590	2837.25
730	unknown1113	0.0419656	0.0724237	18	6	1257.59	0.0825004	0.218889	20	5.99999	4587.75	0.0230784	0.0458182	19	6.01666	3277.66	1270.59	0.387651	2552	2748	3203	2759	4489	4553	5115	4194	2021	2394	2154	2769	3081	4097	2121	1729	3123.69
731	unknown1114	0.00267199	0.00936821	18	0	9201.93	0.224202	0.403824	20	17.9999	28220	0.00504422	0.013323	19	18.05	25292.3	6459.36	0.255389	30142	34088	35412	37648	13920	18056	19590	19286	19303	25607	27535	33665	25523	24949	32173	30235	26695.8
732	unknown1115	0.000171384	0.00137171	24	3	1051.47	0.0201944	0.159709	24.0327	4.58e-05	6728	4.7e-05	0.00045546	24.0163	1.50104	5386.79	1666.84	0.30943	6584	6711	7191	6426	5976	5769	5321	4856	3505	4276	4081	4298	5781	5830	4653	4923	5386.31
739	unknown1121	0.0144977	0.0319142	24	6	1241.15	0.0286573	0.160845	20	6.00001	7502.75	0.00365033	0.0105796	22	6.05	6273.77	638.176	0.101721	6935	6821	6571	6575	8142	7714	7312	6843	4144	5148	5267	5225	6781	5908	5053	5308	6234.19
741	unknown1123	0.00536208	0.0162704	18	6	7322.44	0.0897927	0.227903	20	6.00001	26042.2	0.0041593	0.0116192	19	6.01667	18318.9	7554.61	0.412394	14308	15955	15636	15035	27788	25300	28950	22131	9592	11685	13119	13239	19588	22185	12259	11685	17403.4
742	unknown1124	0.00164724	0.00666594	18	0	2081.37	0.0185016	0.159709	24.1644	17.9999	6746.74	0.000347389	0.00193881	21.0822	18.3931	5368.11	2001.24	0.372802	7376	7785	7762	6771	4474	4510	3442	3786	4264	4263	4062	4482	8223	6068	6061	6635	5622.75
744	unknown1126	0.0065055	0.0176718	18	6	2432.27	0.0627624	0.192329	20	6	11907.5	0.00359448	0.0104809	19	6.01667	9507.59	1945.67	0.204643	9909	10039	9953	9222	13481	12673	11695	9781	4979	6893	6485	7312	11156	10073	6983	7715	9271.81
747	unknown1129	0.00267199	0.00936821	24	3	1753.98	0.0737634	0.205796	23.2718	6.63e-05	11968.5	0.00187868	0.00646636	23.6359	1.47728	9991.59	2414.53	0.241657	12796	13149	11151	10778	10842	11409	10009	9918	6238	8252	8055	8939	11772	9295	8007	9527	10008.6
749	unknown1130	1.91e-05	0.00025515	18	9	1733.47	0.0166066	0.159709	20	6	8715.75	5.06e-06	8.18e-05	19	7.6	3443.69	4002.88	1.16238	348	387	397	358	7552	9343	9426	8542	1026	1079	887	716	599	945	536	368	2656.81
750	unknown1131	0.0210199	0.0421957	18	6	998.435	0.031068	0.161527	20	5.99998	7301	0.00544239	0.0140467	19	6.01666	6170.98	859.641	0.139304	6413	6332	6620	6693	7504	7699	7358	6643	4136	4750	5044	5358	6876	5299	5236	5108	6066.81
751	unknown1132	0.00421867	0.0128369	18	6	1399.36	0.0327657	0.16536	20	6.00001	6541.75	0.0013666	0.00509242	19	6.01667	5200.27	1023.42	0.196801	5613	5354	5760	5557	6429	6626	6693	6419	2731	3374	3737	3882	6140	5397	3532	3976	5076.25
752	unknown1133	7.77e-06	0.000124608	24	3	792.667	0.0279174	0.160845	23.52	6.38e-05	4662.5	3.55e-06	6.21e-05	23.76	1.48503	3830.77	1008	0.263133	4475	4936	4674	4565	4214	4452	3823	3648	2619	2951	2993	3272	4400	3451	3318	3574	3835.31
753	unknown1134	0.0210199	0.0421957	18	6	750.417	0.047193	0.173183	20	5.99999	4530.75	0.00785239	0.0189082	19	6.01666	3864.24	473.36	0.122498	4197	3670	4504	4219	4745	4653	4594	4131	2379	2898	3066	2998	4423	4092	3014	3327	3806.88
754	unknown1135	0.0144977	0.0319142	18	6	2275.82	0.0601264	0.188828	20	6.00001	8111.25	0.00701286	0.0172925	19	6.01667	5906.03	2195.29	0.371703	4673	4733	4954	5366	8181	8091	8494	7679	3578	4166	4688	4881	6176	6467	3945	4168	5640
755	unknown1136	0.000320124	0.00217263	24	0	981.464	0.035583	0.166866	24.7059	6.63e-05	5730.24	0.000141051	0.00106033	24.3529	3.27e-05	4430.46	1318.2	0.297532	5927	5925	5283	5786	4231	4830	3852	4036	2752	3215	3436	3560	5733	4185	3639	4263	4415.81
757	unknown1138	0.0065055	0.0176718	18	6	2982.22	0.0276711	0.160845	20	6	10968.8	0.00173218	0.00611496	19	6.01667	7848.14	2700.12	0.344046	7750	6886	8393	7986	11956	11115	10989	9815	3281	4748	5220	5734	8160	7992	4612	5698	7520.94
758	unknown1139	0.0210199	0.0421957	18	6	448.659	0.493214	0.713938	20	6	5128.25	0.0577365	0.0987358	19	6.01667	4690.77	416.349	0.0887592	4398	4530	4419	4762	4698	5621	5190	5004	3496	3941	4581	4560	5052	4828	4412	4753	4640.31
761	unknown1141	0.0299489	0.0559443	18	6	677.055	0.343395	0.548267	20	6.00001	4437.75	0.057357	0.0982031	19	6.01667	3741.76	663.897	0.177429	3509	3344	3424	3772	3672	4914	4733	4432	2654	2981	3309	3447	4266	4284	2817	3023	3661.31
764	unknown1144	0.000572095	0.00320048	24	3	925.956	0.0425007	0.168276	23.2718	6.27e-05	4910	0.000282641	0.00168489	23.6359	1.47727	3932.26	1216.45	0.309352	5401	4776	4789	4674	4228	4605	3837	3922	2234	2952	3039	3321	4765	3309	3270	3931	3940.81
768	unknown1148	0.0359573	0.0669944	18	6	817.062	0.35613	0.562584	20	5.99997	4683.25	0.0686102	0.113956	19	6.01665	3773.69	889.728	0.235771	3027	3186	3726	3661	4380	4668	5611	4074	2689	3030	3081	3020	4070	4848	3027	2556	3665.88
771	unknown1150	0.0419656	0.0724237	18	6	2215.9	0.11445	0.260072	20	6.00002	11832.8	0.0304438	0.0581993	19	6.01667	9894.85	1499.66	0.151559	9336	9458	11310	11221	11801	11487	12868	11175	6030	6939	7696	8072	11082	12084	6880	7971	9713.12
773	unknown1152	0.000572095	0.00320048	24	3	1875.6	0.0389156	0.167576	22.7907	6.48e-05	8868.24	0.000260762	0.00159028	23.3953	1.46224	6807.41	2656.34	0.390213	9024	8061	9560	8828	8889	7498	6685	6090	3221	4585	4764	5443	7982	6223	5360	7229	6840.12
774	unknown1153	0.0299489	0.0559443	18	6	2668.27	0.172874	0.334919	20	6	15828.8	0.0324283	0.0614237	19	6.01667	13024.1	2368.96	0.18189	12740	11992	14084	13427	14027	16525	17766	14997	7355	9334	10816	11417	15028	15232	8857	10196	12737.1
775	unknown1154	0.0210199	0.0421957	18	6	749.18	0.424552	0.639189	20	5.99999	4573	0.0510365	0.0891889	19	6.01666	3801.49	741.079	0.194944	3113	3593	3516	3796	4027	5296	4507	4462	2118	2614	3418	3586	4560	4359	3129	3293	3711.69
776	unknown1155	0.000171384	0.00137171	24	3	1028.66	0.0347075	0.166866	21.3559	6.63e-05	5394.25	7.75e-05	0.000667327	22.678	1.41741	4451.19	1227.55	0.275781	5813	5112	5597	5055	4959	5424	5061	4581	2436	3457	3236	3763	4983	4711	3499	4144	4489.44
777	unknown1156	0.0419656	0.0724237	24	3	986.591	0.114625	0.260072	20.9501	5.99997	5946.5	0.0304829	0.0582478	22.4751	4.62304	5255.59	670.295	0.127539	5451	5628	6384	6206	5701	6504	5641	5940	3160	4220	4248	4980	6180	5034	3813	4740	5239.38
783	unknown1161	0.0359573	0.0669944	24	6	704.632	0.0698045	0.200833	20	6	5140.75	0.0175384	0.036669	22	6.05	4463.35	329.092	0.0737321	4805	4693	4778	4703	5078	5332	5375	4778	3058	3823	3682	4200	4964	3938	3417	4463	4442.94
788	unknown1166	0.0210199	0.0421957	24	6	1357.29	0.0342846	0.166163	20	6.00002	6375.25	0.00593486	0.0151164	22	6.05001	4934.46	730.782	0.148098	5061	5758	5045	5584	6839	6856	6072	5734	2249	3090	3489	4286	5436	4194	3569	4964	4889.12
790	unknown1168	0.000987235	0.00460639	24	3	1692.99	0.0385703	0.167576	21.0501	6.63e-05	7161	0.000425554	0.00223352	22.5251	1.40785	5887.94	1637.18	0.278057	7115	6693	7360	7476	7286	7683	6645	6595	3155	3927	3923	5289	6662	6162	3933	5240	5946.5
791	unknown1169	2.89e-06	5.71e-05	18	9	3777.72	0.0218273	0.159709	20	5.99999	10613.2	1.11e-06	2.39e-05	19	7.6	4447.44	4767.23	1.0719	641	880	720	601	7431	11390	12125	11507	1452	2063	1756	1210	1356	1191	852	990	3510.31
792	unknown117	0.0299489	0.0559443	18	6	3557.1	0.999993	1	28	6	10183	0.135017	0.20356	23	6.29762	7925.53	1756.95	0.221682	4901	4191	4826	4128	9942	8858	11272	10660	4591	6231	9287	3694	20297	8139	7740	7083	7865
793	unknown1170	0.000572095	0.00320048	24	3	1796.4	0.0417216	0.168276	24.8451	6.51e-05	8476.24	0.000277902	0.00166895	24.4225	1.52644	6793.56	1787.92	0.263179	9039	8560	7879	8427	7804	8239	6454	6732	4289	5699	5222	5680	7539	5263	5194	6485	6781.56
794	unknown1171	0.0065055	0.0176718	18	6	2804.74	0.0916802	0.231203	20	6	12993	0.00502461	0.013323	19	6.01667	10293.2	2195.6	0.213306	9967	9265	11137	12042	11718	13199	13966	13089	5078	6661	6992	9188	11447	12198	6979	7508	10027.1
795	unknown1172	0.0299489	0.0559443	24	3	408.177	0.182134	0.34911	21.995	6.63e-05	3097.5	0.0338808	0.0637288	22.9975	1.43738	2726.39	447.092	0.163987	3017	2950	3291	3132	2835	3032	3025	2947	1697	2431	2372	2590	3223	2851	2103	2285	2736.31
797	unknown1174	0.0144977	0.0319142	18	6	2688.42	0.317664	0.5171	20	6	11876.2	0.0293849	0.0565748	19	6.01667	9457.41	2113.86	0.223513	8443	8818	8869	10879	9197	12667	12822	12819	5437	6506	6934	7868	11553	12332	6515	5561	9201.25
798	unknown1175	0.0065055	0.0176718	18	6	1033.44	0.284097	0.478654	20	6.00001	5333	0.0134799	0.0297038	19	6.01667	4513.82	671.067	0.148669	4021	4155	4971	4980	5616	5312	5048	5356	2350	2812	3276	4123	6481	4286	4535	3598	4432.5
799	unknown1176	0.00164724	0.00666594	24	0	1075.86	0.0730203	0.204514	24.7059	6.63e-05	6789.99	0.00120591	0.00461679	24.3529	3.27e-05	5573.11	1315.21	0.235992	6151	6277	6866	7866	4485	6022	5391	4835	3960	4532	4911	4628	6231	6448	4885	5448	5558.5
801	unknown1178	0.0065055	0.0176718	18	9	1420.22	0.028372	0.160845	20	5.99999	6915.5	0.00177144	0.00619398	19	7.6	3840.64	2361.75	0.614936	1703	1921	1893	1869	6938	7082	7391	6251	1298	2250	2703	3249	3000	2603	1745	2126	3376.38
809	unknown1185	0.00421867	0.0128369	18	6	1898.94	0.147445	0.302702	20	6	9611.5	0.00521412	0.0136099	19	6.01667	7567.71	1840.91	0.243258	6441	7293	7379	7874	9882	9606	9365	9593	3738	4787	6344	7146	8885	8531	5072	5578	7344.62
810	unknown1186	0.00164724	0.00666594	18	6	2372.7	0.0629451	0.192753	20	6	9326	0.00105491	0.00420993	19	6.01667	6965.98	2179.43	0.312868	6322	7281	6019	6056	8252	10050	8807	10195	3665	4174	5279	5518	8283	6243	5017	6069	6701.88
812	unknown1188	0.0419656	0.0724237	18	6	1079.75	0.225062	0.404701	20	6	5782.75	0.0534796	0.0926636	19	6.01667	4703.03	893.508	0.189986	4154	4502	4724	5703	5684	5755	6012	5680	2277	3118	3481	4585	5509	5726	2856	3750	4594.75
813	unknown1189	0.0299489	0.0559443	18	6	1610.44	0.0350074	0.166866	20	6	6284.5	0.00824118	0.0196716	19	6.01667	4697.7	1373.62	0.292401	4048	4219	4529	5826	6892	6350	5818	6078	2222	2852	3431	4176	4496	4179	3405	3979	4531.25
815	unknown1190	0.0299489	0.0559443	24	3	3160.77	0.150972	0.306474	21.0501	6.63e-05	20854.5	0.0289324	0.0558029	22.5251	1.40785	17219.8	5335.17	0.309828	18762	19581	21489	23586	16962	18463	18231	19016	9149	11424	14233	15044	22322	22252	13421	14635	17410.6
816	unknown1191	0.0065055	0.0176718	18	0	4551.82	0.239237	0.422815	23.3952	17.9999	18690	0.0116188	0.0261484	20.6976	18.311	15048.6	5382.02	0.357642	14634	16801	25009	25904	10332	8728	10687	11883	8904	11603	14611	19373	19933	21947	13446	19434	15826.8
817	unknown1192	0.0065055	0.0176718	18	6	4682.11	0.053406	0.181327	20	6	18015.8	0.00311471	0.00937879	19	6.01667	13481.8	3971.56	0.294587	11901	11668	13157	15933	18954	18237	17194	17678	6401	7711	9974	11563	14598	14292	8957	9790	13000.5
823	unknown1198	0.0065055	0.0176718	24	0	1368.96	0.0816091	0.218241	25.4179	6.63e-05	5581.74	0.00453444	0.0123953	24.7089	3.22e-05	4109.81	1435.3	0.349237	5596	5502	5501	5728	3441	3994	2563	3388	2238	3129	3557	3574	5440	2878	3849	4887	4079.06
827	unknown1200	8.77e-05	0.00082364	24	0	1026.72	0.0236804	0.159709	24.9858	6.63e-05	5597.24	2.92e-05	0.000320613	24.4929	3.25e-05	4206.99	1402.83	0.333451	5413	5210	5656	6110	4447	3721	3652	3747	2399	2813	3234	3583	5024	4105	3612	4243	4185.56
830	unknown1203	0.00267199	0.00936821	24	0	1269.61	0.0492241	0.176258	25.5652	6.63e-05	7736.99	0.00130689	0.00490932	24.7826	3.21e-05	5953.62	1655.52	0.278069	7793	7047	7725	8383	6412	5883	4837	5111	3536	4433	4651	5553	7136	5243	5056	5838	5914.81
832	unknown1205	0.00421867	0.0128369	18	0	2071.12	0.087897	0.225654	25.7143	17.9999	4892.99	0.00330013	0.00978738	21.8571	18.5785	4516.36	1712.53	0.379184	7418	5578	7285	7075	3673	3787	2792	3517	2571	3597	3822	4106	5372	3162	4403	6635	4674.56
834	unknown1207	0.0299489	0.0559443	24	0	1461.59	0.290179	0.485126	23.7736	6.63e-05	10318	0.0499318	0.0876387	23.8868	3.33e-05	8683.91	1974.14	0.227333	8789	8613	11050	12820	8715	7508	8501	8231	5355	6320	7174	9175	10782	9575	7574	8879	8691.31
837	unknown121	0.000320124	0.00217263	18	6	17208.7	0.0441482	0.168276	20	6.00001	39267.2	0.000171955	0.0012048	19	6.01667	20954.8	18194	0.868251	14349	16521	12602	8416	32609	34762	51808	37890	7654	9193	8470	5688	17363	19675	11981	11019	18750
841	unknown1213	0.0065055	0.0176718	24	0	1012.58	0.133726	0.285416	24.2975	6.63e-05	7907.74	0.00700058	0.0172819	24.1488	3.3e-05	6588.8	1471.25	0.223296	7470	7279	7778	9104	6197	6481	5997	6433	3958	5069	5867	6403	8216	7257	5563	6236	6581.75
842	unknown1214	0.0144977	0.0319142	24	3	619.426	0.142621	0.296022	21.1511	6.63e-05	4735.25	0.0148487	0.0322441	22.5755	1.41101	4014.1	996.011	0.248128	4378	4055	5056	5452	4490	4611	3984	4385	2060	3050	3253	3858	4792	4309	3292	3746	4048.19
845	unknown1217	0.00421867	0.0128369	24	3	1617.86	0.12566	0.27525	24.1644	4.81e-05	11120	0.00452848	0.0123868	24.0822	1.50516	9181.81	2322.61	0.252958	11038	10377	10828	12237	9924	10232	7982	9358	5425	6996	7947	8747	11245	7858	7401	9261	9178.5
846	unknown1218	0.00267199	0.00936821	24	3	2582	0.107794	0.252432	23.6461	4.09e-05	21069.2	0.00263613	0.00828321	23.8231	1.48896	17313.7	4899.09	0.28296	20383	18247	21829	23818	18638	17568	16347	16978	9970	12657	14801	16237	21817	15835	14636	17515	17329.8
847	unknown1219	0.00980952	0.0239973	18	9	2564.68	0.0379482	0.167576	20	6	9594.25	0.00331154	0.00980765	19	7.6	5522.27	3008.13	0.544726	3086	3198	2734	3212	11468	10730	8204	7975	2955	3645	3694	3361	5206	3132	3010	3285	4930.94
849	unknown1220	0.0299489	0.0559443	24	3	2221.2	0.119593	0.26712	20	6	13933.2	0.0237534	0.0469431	22	4.675	10823.8	3752.24	0.346666	10902	10284	10924	12779	18954	12686	12146	11947	6293	7922	8686	9076	11632	9216	8323	9568	10708.6
851	unknown1222	0.0210199	0.0421957	24	3	2888.35	0.10742	0.252208	20.5594	6.63e-05	19391.5	0.0160163	0.0343288	22.2797	1.39252	16661.7	3910.74	0.234714	18267	17511	19927	21861	19904	18333	17263	17728	9438	11955	14139	15458	20218	17874	13613	15826	16832.2
852	unknown1223	0.00421867	0.0128369	24	3	1254.41	0.146167	0.300952	21.5648	6.63e-05	7596.75	0.00517428	0.01354	22.7824	1.42393	6359.44	1615.22	0.253988	6959	6226	8213	8989	7651	6733	6916	6776	3408	4512	5085	6118	7550	6421	4784	6137	6404.88
853	unknown1224	0.000171384	0.00137171	24	3	1330.95	0.021868	0.159709	25.4179	6.63e-05	8592.23	5.06e-05	0.000480235	24.7089	1.54434	6272.14	2428.61	0.387206	8358	8020	8588	9403	5528	6320	5497	5921	3433	4586	4610	4979	7679	5494	5409	6125	6246.88
854	unknown1225	0.00267199	0.00936821	24	0	1098.49	0.0869558	0.224787	24.9858	6.63e-05	7127.99	0.00217645	0.00718761	24.4929	3.25e-05	5439.74	1640.67	0.301608	6657	5815	7371	8669	5148	5648	4936	5118	2781	3687	4257	5072	6647	4997	4171	5661	5414.69
858	unknown1229	0.00267199	0.00936821	24	0	1341.38	0.0481709	0.17469	23.9024	6.58e-05	9053.74	0.00128171	0.00484275	23.9512	3.29e-05	7208.63	1941.89	0.269384	8512	8815	8969	9919	7332	6846	7455	6762	3890	5186	5619	6665	9057	7109	6050	7202	7211.75
859	unknown123	0.0419656	0.0724237	18	9	4105.46	0.113286	0.258718	20	5.99998	18082.2	0.0301827	0.0578535	19	7.59999	11991.2	4693.19	0.391386	8620	9434	6263	5105	13548	20605	19943	18233	10111	10064	8331	7344	12778	10231	7951	8537	11068.6
864	unknown1234	0.0210199	0.0421957	24	3	998.081	0.107769	0.252432	20.6557	5.99999	5076.5	0.016061	0.0343428	22.3279	4.63835	4376.89	695.64	0.158935	4487	4296	5302	6130	5335	5165	4848	4958	2302	3050	3420	3960	4930	4721	3126	3708	4358.62
871	unknown1240	0.0065055	0.0176718	24	0	900.324	0.14842	0.30314	24.4321	6.63e-05	6143.99	0.00766913	0.018562	24.2161	3.29e-05	5121.03	1171.28	0.228719	5887	5664	6095	6930	4344	5300	4470	5125	3330	4030	4396	4869	6795	5341	4299	4932	5112.94
874	unknown1243	0.0144977	0.0319142	24	6	1002.5	0.0439711	0.168276	20	6	6084	0.00532805	0.0138229	22	6.05	5064.54	595.062	0.117496	5404	5097	5110	5575	6126	6398	5678	6134	3465	4198	4217	4340	5796	3884	4203	4817	5027.62
876	unknown1245	0.00980952	0.0239973	24	3	801.859	0.0993839	0.24176	21.7778	4.8e-05	4875.5	0.00773411	0.0186973	22.8889	1.43058	4233.16	759.365	0.179385	4924	4382	5287	4909	5477	4460	4665	4346	2754	3362	3772	3778	4847	3309	3651	4113	4252.25
879	unknown1248	0.0065055	0.0176718	24	9	2482.3	0.0224432	0.159709	20	6.00001	9495.75	0.00143549	0.005272	22	7.42501	4825.91	3668.83	0.760236	2195	1956	2282	2430	9901	8987	9824	9271	1918	4284	3976	5119	3744	1902	1470	3029	4518
880	unknown1249	0.000987235	0.00460639	24	0	3882.02	0.0643091	0.194527	23.7736	7.06e-05	25327	0.00067708	0.00308606	23.8868	3.55e-05	20038.5	5513.3	0.275135	23814	22665	26976	27853	19136	19461	20577	20164	10450	14187	15753	18216	25304	21260	15471	19660	20059.2
884	unknown1252	0.00421867	0.0128369	18	9	1380.45	0.138882	0.29232	20	5.99999	5128.75	0.00494635	0.013172	19	7.59999	2410.4	2164.02	0.897784	405	337	1022	1011	9191	2360	4169	4795	282	1461	1447	1835	1055	971	199	1220	1985
886	unknown1254	1.91e-05	0.00025515	18	0	10575.3	0.0277092	0.160845	24.9858	17.9999	27966.7	8.17e-06	0.000118779	21.4929	18.4883	24501.8	8875.08	0.362221	33697	32648	37852	37712	18972	17556	17353	20088	15022	20364	21545	22791	31029	24640	27954	28244	25466.7
887	unknown1255	0.0144977	0.0319142	24	0	724.961	0.145643	0.300302	24.4321	6.87e-05	5562.74	0.015119	0.0326837	24.2161	3.4e-05	4505.6	1073.87	0.238342	5773	5691	4459	6328	4508	4566	4255	4239	2327	3752	3626	4323	5313	3779	3840	5192	4498.19
892	unknown126	0.00267199	0.00936821	18	6	5055.11	0.0214259	0.159709	20	6	10024.8	0.000616472	0.00287643	19	6.01667	4585.88	5592.45	1.21949	1486	2013	1586	1818	12076	9456	9882	8685	1611	1723	1698	1928	2583	2192	2049	1745	3908.19
894	unknown1261	0.0144977	0.0319142	24	21	743.7	0.160736	0.319892	24.4321	17.9999	7161.24	0.016456	0.0349935	24.2161	19.5149	6325.14	870.166	0.137573	6253	7150	5918	7121	4706	6095	5643	5822	5448	5892	6102	6280	7996	7073	7492	6084	6317.19
896	unknown1263	0.0144977	0.0319142	24	0	808.577	0.140117	0.293663	25.1282	6.63e-05	5409.24	0.014624	0.0318466	24.5641	3.24e-05	4264.04	1127.02	0.264308	4765	4816	5885	6171	3627	4081	3944	4601	2103	3199	3567	4210	5238	4506	3278	3921	4244.5
897	unknown1264	0.0299489	0.0559443	18	6	2238.35	0.384911	0.595237	20	6.00001	12559.5	0.0629757	0.106021	19	6.01667	10567.1	1941.92	0.183771	8842	9360	9430	11582	12104	12851	12959	12324	6590	8790	9035	11437	12314	10694	7854	9142	10331.8
898	unknown1265	0.00421867	0.0128369	24	3	1683.62	0.103505	0.246521	21.7778	6.63e-05	10714	0.00381476	0.0108957	22.8889	1.43059	9003.48	2208.13	0.245253	10312	9685	10976	11883	9471	9707	10420	9575	4666	7059	7172	8685	10794	8889	6981	8669	9059
900	unknown1267	0.0299489	0.0559443	24	6	1644.38	0.0653739	0.19627	20	6	8967.25	0.014167	0.0309657	22	6.05	6897.24	1301.56	0.188708	8049	5975	6794	7552	7824	8757	9726	9562	3082	5242	4530	6901	6679	6416	5180	6795	6816.5
901	unknown1268	0.000572095	0.00320048	24	0	1519.22	0.0362854	0.166866	24.7059	6.63e-05	9834.24	0.00024459	0.00153139	24.3529	3.27e-05	8083.34	1988.25	0.245969	10861	9352	9995	9129	7538	6958	7589	7158	5880	7125	6196	7151	9263	8743	6932	9110	8061.25
904	unknown1270	0.00980952	0.0239973	24	3	805.218	0.145216	0.299708	26.3284	8.01e-05	4711.49	0.0107606	0.0243562	25.1642	1.5728	3739.17	914.241	0.244504	4783	3806	5327	4930	4421	4253	3416	3353	2206	3432	2561	3658	3745	2906	2755	4057	3725.56
907	unknown1273	4.22e-05	0.000465917	24	3	1257.41	0.0206705	0.159709	24.1644	5.05e-05	6275.74	1.3e-05	0.000173159	24.0822	1.50516	4662.23	1915.11	0.410772	6540	5381	6414	6768	4890	4951	4657	4929	2150	3150	3183	3837	5134	4472	3649	4447	4659.5
908	unknown1274	0.0419656	0.0724237	24	0	1116.88	0.144272	0.29839	26.8085	6.63e-05	8185.74	0.0369743	0.0684768	25.4043	3.14e-05	6486.34	1316.61	0.202981	9094	7503	8089	8057	6205	5973	5343	5724	4317	6153	5123	6545	7404	5314	5159	6958	6435.06
909	unknown1275	4.22e-05	0.000465917	24	3	747.765	0.0360622	0.166866	24.4321	5.86e-05	4392.25	2.19e-05	0.000259926	24.2161	1.51353	3494.23	1013.06	0.289922	4247	3747	4810	4765	3620	3625	3827	3662	2016	2658	2722	3128	3653	3514	2721	3134	3490.56
910	unknown1276	0.000987235	0.00460639	24	3	701.45	0.0380435	0.167576	25.8651	7.19e-05	4405.75	0.000420258	0.00221646	24.9326	1.55832	3564.95	834.829	0.234177	4337	4400	4606	4280	3903	3830	3253	3504	2498	3270	2793	2932	3924	2961	2797	3580	3554.25
911	unknown1277	0.0210199	0.0421957	18	6	545.71	0.149003	0.303615	20	6	4376.75	0.0211915	0.0429664	19	6.01667	3888.49	355.761	0.0914909	4221	3905	3929	4202	3956	4676	4400	4475	2706	3073	3129	3625	4433	4310	2892	3594	3845.38
912	unknown1278	0.00267199	0.00936821	24	3	1758.57	0.0978051	0.239669	23.7736	6.63e-05	13313.2	0.00241727	0.00777043	23.8868	1.49296	11624.2	1819.25	0.156505	12469	12860	13998	13926	11440	12551	12751	12901	8636	9958	10299	10720	12414	12393	8559	10172	11627.9
916	unknown1281	0.000320124	0.00217263	24	3	700.743	0.0654082	0.19627	22.6735	6.63e-05	4007.75	0.000246531	0.00153306	23.3368	1.45858	3252.95	944.506	0.290354	3691	3728	4170	4442	3291	3584	3542	3568	1785	2460	2499	2869	4075	2910	2487	3153	3265.88
917	unknown1282	0.0210199	0.0421957	24	3	1465.13	0.111292	0.25689	20.9501	6.63e-05	8164.5	0.0165109	0.0350623	22.4751	1.40473	6857.67	1797.37	0.262097	8118	7553	8284	8703	7734	6525	7151	9061	3969	5109	5230	5970	8325	7939	5141	5984	6924.75
922	unknown1287	0.00267199	0.00936821	24	0	766.15	0.128669	0.278291	23.9024	6.63e-05	4674.49	0.00308579	0.00932413	23.9512	3.32e-05	3812.1	1027.05	0.269418	4311	4127	4794	5466	3250	3829	3446	3826	2279	2697	3145	3620	4935	4258	2936	4101	3813.75
928	unknown1292	0.0210199	0.0421957	18	6	1871	0.145871	0.300586	20	6	6342.5	0.0208112	0.0423064	19	6.01667	4567.37	1602.93	0.350952	4880	5258	3662	3307	6384	7002	4835	7149	2421	2914	2911	2908	5124	2313	3025	5877	4373.12
930	unknown1294	0.000171384	0.00137171	18	0	1246.28	0.041472	0.168276	23.3952	17.9999	5002.24	9.14e-05	0.000763719	20.6976	18.311	3982.12	1297.67	0.325875	5217	5184	4924	5471	3200	3374	2236	2797	3248	3486	3390	4180	6179	4720	4014	5096	4169.75
937	unknown130	0.000572095	0.00320048	18	9	6361.84	0.0310263	0.161527	20	6.00002	20794.2	0.000211919	0.00139454	19	7.60001	11208.5	8138.06	0.726061	5279	4466	3313	2809	21459	23547	20529	17642	10279	8880	7050	4802	9049	5594	5111	3931	9608.75
939	unknown1301	0.00267199	0.00936821	24	3	553.488	0.112533	0.258499	20.7529	6.63e-05	4596.25	0.0027391	0.00853081	22.3765	1.39857	3942.23	949.204	0.240778	4124	4430	4441	5390	4307	4656	3972	4002	2570	2915	3020	3657	5048	3706	3563	3889	3980.62
940	unknown1302	8.77e-05	0.00082364	24	0	1314.87	0.0291295	0.160845	24.4321	6.63e-05	6193.24	3.54e-05	0.000373516	24.2161	3.29e-05	4724.97	1679.08	0.355362	6586	6166	5362	6659	4261	4391	3882	4575	2911	3257	3368	3834	6272	4435	4249	5206	4713.38
941	unknown1303	0.0210199	0.0421957	24	3	1531.24	0.150406	0.305755	21.253	6.63e-05	10410.5	0.0213614	0.043222	22.6265	1.41419	8672.06	2415.06	0.278487	10561	9628	9815	11638	8640	9333	9428	10137	4859	5753	6877	8148	11158	9999	6023	8019	8751
944	unknown1306	0.00980952	0.0239973	24	0	857.897	0.101864	0.244631	25.1282	6.63e-05	4414.99	0.00790246	0.0189993	24.5641	3.24e-05	3440.15	1010.69	0.293792	4434	4235	4158	4833	2551	3096	2975	3182	2197	2569	2982	3156	4771	3711	2568	3344	3422.62
946	unknown1308	0.00421867	0.0128369	24	3	1690.34	0.13713	0.290069	23.3952	4.6e-05	9867.99	0.0048913	0.0130575	23.6976	1.48112	7777.53	2752.87	0.353951	9698	8667	9201	11906	7261	8438	7123	8671	4598	5194	5834	6620	10935	8283	5794	6471	7793.38
947	unknown1309	0.00980952	0.0239973	18	0	2084.37	0.066912	0.197632	20	17.9999	9119.99	0.0054668	0.0140984	19	18.05	7502.47	1967.37	0.262229	10194	11312	8110	8461	3351	5460	5414	5367	8917	8549	8374	6890	9995	8702	9687	8096	7929.94
949	unknown1310	0.00980952	0.0239973	18	0	1486.16	0.220157	0.399005	25.1282	17.9999	5941.49	0.0154151	0.0332407	21.5641	18.5055	5536.2	1316.65	0.237827	7327	7319	6558	7565	4237	5581	3427	4591	4644	4943	5178	5666	7335	4355	5434	6642	5675.12
951	unknown1312	0.0299489	0.0559443	24	0	770.039	0.279034	0.473254	23.7736	6.63e-05	5017.74	0.0483412	0.0854358	23.8868	3.33e-05	4436.47	1023.74	0.230755	5072	4505	4971	5523	3615	4031	4387	4034	3395	3140	3883	4433	5515	6385	4194	3962	4440.31
952	unknown1313	0.00980952	0.0239973	24	21	1566.77	0.0859947	0.223638	20	17.9999	7532.24	0.00681422	0.0169093	22	19.525	6131.34	1557.78	0.254068	7718	8676	5714	6788	2516	4508	4047	4555	8012	6041	6503	5196	8222	6989	8459	6459	6275.19
954	unknown1315	4.22e-05	0.000465917	18	0	1450.81	0.0225441	0.159709	24.0327	17.9999	4915.24	1.41e-05	0.000183812	21.0163	18.3786	4044.38	1365.04	0.337517	5328	5767	5474	5320	3160	2690	2937	3137	3462	3487	3722	3409	5425	4402	5594	4240	4222.12
956	unknown1317	0.000320124	0.00217263	24	0	1867.12	0.0473956	0.173457	24.7059	6.63e-05	9181.48	0.000183527	0.00125691	24.3529	3.27e-05	7208.71	2285.57	0.317057	9182	8761	8685	10098	5619	6284	6049	6768	4935	5036	6222	6103	9861	8127	6298	6905	7183.31
958	unknown1319	0.00421867	0.0128369	24	0	1304.26	0.0673846	0.198391	24.8451	6.63e-05	8254.49	0.00260553	0.00820505	24.4225	3.26e-05	6782.28	1584.21	0.23358	8561	7413	7973	9071	5968	6460	5986	6704	4848	5326	5764	6141	8072	7962	5855	6078	6761.38
959	unknown132	0.0419656	0.0724237	18	9	1235.67	0.0484245	0.175023	20	6	7021.5	0.0146288	0.0318466	19	7.6	5017.93	1439.29	0.286829	4306	3817	3638	3710	7830	6388	7710	6158	3504	4420	3863	3908	4394	3856	3247	5011	4735
960	unknown1320	0.00267199	0.00936821	24	0	3149.45	0.102319	0.245316	23.6461	5.04e-05	19163.2	0.00251649	0.00801796	23.8231	2.54e-05	15711.1	4003.97	0.254849	18526	17823	19142	21162	14228	15041	14605	16447	9887	11532	12841	14235	20902	17985	12201	15199	15734.8
962	unknown1322	0.0065055	0.0176718	24	3	846.23	0.0721446	0.203376	20.7529	4.43e-05	4100.25	0.00406642	0.0114335	22.3765	1.39855	3376.37	999.947	0.296161	4753	4509	3616	3523	4136	4603	3032	3918	1880	2557	2445	2435	3629	3071	2701	3861	3416.81
967	unknown1327	0.0210199	0.0421957	24	0	688.722	0.171852	0.333986	26.6465	6.63e-05	5740.49	0.0239258	0.0472608	25.3233	3.15e-05	4789.39	763.895	0.159497	5662	6008	5441	5851	4059	5118	4286	4416	3621	3957	4546	4692	5394	4634	3531	4961	4761.06
968	unknown1328	0.0144977	0.0319142	18	9	7119.86	0.427763	0.641793	20	6	22794	0.037724	0.0695676	19	7.6	16127	6873.32	0.426201	6381	6657	8901	10132	16588	23814	27420	23354	11985	11979	16253	20351	15097	24267	7032	6202	14775.8
969	unknown1329	0.000987235	0.00460639	18	9	3619.68	0.115008	0.260588	20	6.00002	13114.5	0.00114486	0.00445395	19	7.60001	6962.25	5078.13	0.729381	1920	1359	3982	3615	20389	7177	11476	13416	1371	5336	5094	6531	4165	4357	743	4493	5964
972	unknown1331	0.0210199	0.0421957	24	0	678.292	0.112721	0.258539	23.9024	6.63e-05	4198.25	0.0166926	0.035327	23.9512	3.32e-05	3498.67	831.915	0.237781	4351	4057	3949	4436	3538	3298	3057	3326	2240	2685	2883	3373	4454	4186	2805	3362	3500
973	unknown1332	0.0210199	0.0421957	24	0	2575.11	0.11658	0.262639	23.7736	7.34e-05	13607.2	0.0171816	0.0360527	23.8868	3.69e-05	10825	3200.29	0.295639	13162	11766	14117	15384	9326	9937	11929	9986	6418	7206	8779	9501	13690	14246	8590	9355	10837
974	unknown1333	0.000572095	0.00320048	24	0	1277.74	0.0341479	0.166163	26.0177	6.63e-05	5947.24	0.000231368	0.00148168	25.0088	3.19e-05	4252.73	1474.52	0.346724	6662	5612	5681	5834	3127	4000	3236	3352	2854	3146	3588	3384	4780	3625	3748	4721	4209.38
976	unknown1335	0.000171384	0.00137171	18	9	4500.03	0.0330521	0.16536	20	6	9587.75	7.41e-05	0.000644285	19	7.6	4038.21	4212.19	1.04308	773	715	888	992	7924	7382	8840	14205	1021	1455	1430	1673	1328	933	618	1186	3210.19
980	unknown1339	0.0065055	0.0176718	18	6	3245.97	0.0493951	0.176469	20	6	11203.8	0.00290588	0.00890478	19	6.01667	8205.46	2564.02	0.312478	8933	9427	7531	6752	9123	11735	11648	12309	4059	4394	5729	5216	9481	6252	5192	8535	7894.75
981	unknown134	0.000320124	0.00217263	18	6	7709.59	0.0228249	0.159709	20	6	15430.5	9.37e-05	0.000774461	19	6.01667	7122.57	8505.96	1.19423	3187	3345	2310	2562	18760	14253	15614	13095	2318	2843	3060	2111	3883	3777	3155	3196	6091.81
982	unknown1340	0.00980952	0.0239973	18	0	2126.8	0.06333	0.193348	24.8451	17.9999	5763.24	0.00520833	0.0136099	21.4225	18.4714	4930.45	1838.79	0.372946	7424	7455	7365	6244	4372	4383	2610	3425	3562	3939	4089	4258	7579	4290	4887	6297	5136.19
990	unknown1348	0.00267199	0.00936821	24	3	1393.53	0.0749905	0.207497	24.1644	4.89e-05	9322.74	0.00190662	0.00653657	24.0822	1.50516	7491.33	2201.15	0.293827	9497	8625	9405	9764	9372	7619	6359	7377	4389	5112	6036	7211	8027	7480	5750	7788	7488.19
991	unknown1349	0.0210199	0.0421957	24	0	1065.26	0.0889925	0.226802	23.9024	5.36e-05	6950.49	0.0136208	0.0299686	23.9512	2.69e-05	5747.35	1338.84	0.232949	7136	6632	7020	7014	5637	5427	5701	5451	3793	4078	4712	5562	7382	6493	4647	5307	5749.5
998	unknown1355	0.000572095	0.00320048	18	6	1470.96	0.055729	0.183256	20	5.99999	6064.5	0.000361974	0.00199917	19	6.01666	4572.39	1400.42	0.306278	4155	4658	4017	3787	5579	6573	5462	6644	2869	2919	3429	3392	5175	4024	3380	4380	4402.69
1003	unknown136	0.000987235	0.00460639	18	6	2493.26	0.0171687	0.159709	20	6.00001	5580.25	0.000203145	0.00134498	19	6.01667	3165.09	2395.39	0.756817	2409	2580	1827	1835	5605	5148	6115	5453	1488	1692	1871	1543	2254	2205	1966	2006	2874.81
1007	unknown1363	0.0419656	0.0724237	24	0	410.299	0.268492	0.459196	22.5575	5.14e-05	4452.25	0.0618113	0.104263	23.2788	2.65e-05	3923.98	571.893	0.145743	4283	3835	4665	5026	3708	4168	3982	3967	2719	3326	3789	3464	4503	4621	3408	3552	3938.5
1008	unknown1364	0.0419656	0.0724237	24	0	4458.66	0.256901	0.444243	26.3284	6.63e-05	22714.2	0.0596187	0.101354	25.1642	3.17e-05	16916.5	4855.12	0.287005	23672	21577	25349	20259	18566	14964	10859	11738	9036	14848	14002	16766	16158	11264	15724	23296	16754.9
1009	unknown1365	0.00980952	0.0239973	24	6	643.114	0.0735527	0.205634	21.0501	5.99998	3978.75	0.00594108	0.0151234	22.5251	6.02583	3371.95	264.06	0.0783108	3705	3444	3622	4175	3912	4296	3972	3735	1867	2718	2946	3292	3458	3050	2469	3094	3359.69
1011	unknown1367	0.00267199	0.00936821	24	3	633.921	0.0541756	0.181681	24.0327	6.63e-05	3742	0.00142447	0.00525381	24.0163	1.50105	3102.2	693.583	0.223578	3490	3327	4053	4098	3134	3439	3569	3350	1973	2542	2790	2539	3219	3226	2431	2452	3102
1014	unknown137	0.00421867	0.0128369	24	21	907.041	0.0694433	0.20048	23.2718	17.9999	4111.74	0.00267631	0.0083671	23.6359	19.4815	3325.71	1185.88	0.356579	4073	3950	3303	5250	1153	3003	2012	2870	2830	2800	2744	3077	4212	4298	3935	4002	3344.5
1016	unknown1371	0.0144977	0.0319142	24	0	980.227	0.167568	0.32812	24.7059	6.9e-05	7793.74	0.0170544	0.0358648	24.3529	3.4e-05	6444.73	1274.77	0.1978	8168	7177	7999	7831	6094	6958	6172	6528	3892	5167	5713	5949	7936	7268	4596	5441	6430.56
1018	unknown1373	0.000987235	0.00460639	18	9	6567.61	0.0904717	0.228955	20	6.00001	22343	0.000922046	0.0038242	19	7.60001	12755.1	8174.01	0.64084	4353	3077	7883	7469	30538	14309	20859	23666	3211	11549	10070	12762	8665	9028	2063	8871	11148.3
1025	unknown138	0.00980952	0.0239973	24	21	1322.29	0.140338	0.293837	23.52	17.9999	5337.24	0.0104461	0.0237812	23.76	19.4868	4228.75	1577.27	0.372986	5401	4572	3675	7294	1452	4102	2280	3569	3240	3161	3914	3913	5778	5298	4829	5444	4245.12
1028	unknown1382	0.00164724	0.00666594	18	9	5544.07	0.0403159	0.167576	20	6	14827.2	0.000705252	0.00317636	19	7.6	6457.38	6314.33	0.977847	1412	1556	1675	2023	10045	12900	13930	22434	1660	2358	2597	3027	2401	1763	1369	2308	5216.12
1029	unknown1383	0.00164724	0.00666594	18	9	985	0.125862	0.27525	20	6	3523.5	0.00196569	0.00665065	19	7.6	2152.73	1187.42	0.551589	917	606	1560	1405	4826	2226	3222	3820	724	2055	1769	2254	1617	1623	451	1634	1919.31
1032	unknown1386	0.00267199	0.00936821	24	0	697.914	0.138154	0.29124	25.8651	6.63e-05	6475.99	0.003287	0.00975511	24.9326	3.2e-05	5369.82	1002.72	0.186733	6778	5679	6907	6540	5279	5193	5235	4862	3568	4445	4731	5300	5975	5584	3839	5562	5342.31
1033	unknown1387	8.77e-05	0.00082364	18	6	708.521	0.0847797	0.221543	20	5.99997	2632.5	9.52e-05	0.000783923	19	6.01665	1866.46	746.53	0.39997	1621	1659	1487	1490	2218	3036	2463	2813	911	1080	1432	1352	2106	1723	1190	1835	1776
1038	unknown1391	0.00267199	0.00936821	18	9	1208.45	0.0728197	0.204348	20	6	6183.75	0.00185715	0.00641264	19	7.6	4885.41	1213.77	0.248448	3418	3358	4256	4261	5813	6644	6045	6233	3666	4290	5152	5260	4770	4392	3150	3641	4646.81
1040	unknown1393	0.0299489	0.0559443	18	6	574.171	0.292911	0.487996	20	6	3928.25	0.0503196	0.0882478	19	6.01667	3330.32	520.953	0.156427	3165	3080	3433	3498	3425	4171	4255	3862	2198	2510	3034	3060	3499	4105	2313	2667	3267.19
1050	unknown1401	0.000987235	0.00460639	24	3	926.31	0.0786152	0.212354	21.995	6.63e-05	6387.75	0.000812112	0.00351293	22.9975	1.43738	5443.24	1182.92	0.217319	6161	5571	6577	7242	6034	5939	5970	5897	3360	4285	4639	4854	5921	5768	4011	5283	5469.5
1057	unknown1408	0.000572095	0.00320048	24	0	1365.07	0.0687801	0.199343	23.9024	6.63e-05	7660.99	0.000438465	0.002271	23.9512	3.32e-05	6242.86	1802.87	0.28879	6852	6693	8192	8907	5584	6090	5550	5539	4178	4354	5041	5659	7264	8133	5598	6298	6245.75
1060	unknown1410	0.000320124	0.00217263	24	0	2035.41	0.0600507	0.188828	25.1282	6.63e-05	13236.7	0.000227981	0.00147458	24.5641	3.24e-05	10568.3	2814.26	0.266293	11207	12294	14303	15143	8542	9616	9309	9913	6955	8128	9107	9852	12445	11388	9883	10227	10519.5
1063	unknown1413	0.0144977	0.0319142	24	0	967.322	0.183157	0.350141	22.4427	7.8e-05	6426.24	0.0184048	0.0381305	23.2214	4.03e-05	5396.45	1233.02	0.228486	6124	5664	7024	6893	4720	5100	5902	5587	3073	4047	4638	5041	6630	6959	4685	4800	5430.44
1064	unknown1414	0.00164724	0.00666594	24	3	1464.59	0.0279148	0.160845	25.2722	7.78e-05	8305.74	0.000505221	0.00251449	24.6361	1.53979	6366.62	2065.98	0.324501	8560	7901	8866	7896	6071	6621	6627	6722	3530	4953	5124	5080	6809	6871	4682	5238	6346.94
1066	unknown1416	0.0419656	0.0724237	24	0	775.343	0.183952	0.351196	25.1282	6.63e-05	7474.49	0.045268	0.0808957	24.5641	3.24e-05	6444.65	1061.3	0.164679	6965	6885	8645	7403	5432	6344	5652	6240	4636	5531	6225	6414	7251	7054	5950	6193	6426.25
1067	unknown1417	0.0419656	0.0724237	24	0	494.975	0.116236	0.261999	25.2722	6.63e-05	5141.75	0.0308432	0.0587812	24.6361	3.23e-05	4557.99	599.1	0.13144	5072	5122	5086	5287	4108	4514	3942	4404	3693	4114	4283	4506	5385	4253	4502	4471	4546.38
1069	unknown1419	0.0144977	0.0319142	18	6	873.277	0.126815	0.276211	20	5.99998	5937.5	0.013419	0.0295847	19	6.01666	4998.34	885.827	0.177224	4682	4364	4733	5183	5763	6193	5900	5894	3623	4052	4662	4598	5461	5312	3863	3973	4891
1070	unknown142	0.000572095	0.00320048	24	21	666.448	0.0603539	0.188828	22.2166	17.9999	3151.49	0.000389261	0.00210951	23.1083	19.4711	2415.16	732.311	0.303215	2622	2653	2053	3520	886	1907	1310	2088	2572	2157	2228	2506	3183	2937	3134	3352	2444.25
1071	unknown1420	0.0210199	0.0421957	18	6	492.853	0.173467	0.335701	20	6	5818.75	0.0241165	0.0475521	19	6.01667	5427.53	261.209	0.0481267	5605	5453	5673	5744	5303	6228	5981	5763	4270	4310	4938	4943	6381	5751	4976	5015	5395.88
1077	unknown1426	0.0144977	0.0319142	24	0	897.319	0.0841636	0.220795	25.4179	6.63e-05	5198.99	0.00940607	0.0218758	24.7089	3.22e-05	4107.91	1087.09	0.264634	5351	5440	4814	5191	3069	3767	3681	4033	2867	3109	3355	3896	5501	3986	3433	3861	4084.62
1078	unknown1427	0.0144977	0.0319142	18	6	547.831	0.1154	0.260821	20	5.99998	4318.5	0.0123689	0.0276212	19	6.01666	3754.1	538.757	0.143512	3484	3491	3596	3710	4248	4516	4286	4224	2829	2988	3480	3720	3959	3831	3247	3412	3688.81
1082	unknown1430	8.77e-05	0.00082364	24	0	964.14	0.0354835	0.166866	24.0327	6.63e-05	5784.24	4.26e-05	0.000422743	24.0163	3.31e-05	4733.26	1298.32	0.274297	5647	5621	5796	6073	4359	4286	4116	4526	2799	3836	3867	4322	6045	5205	4461	4762	4732.56
1083	unknown1431	0.00267199	0.00936821	24	9	1148.69	0.0442701	0.168444	20	5.99998	6523	0.00118791	0.00455996	22	7.42499	4670.91	1472.66	0.315283	3865	3627	3168	5044	5300	7418	6781	6593	3808	3981	4791	4797	4177	3376	3590	2441	4547.31
1085	unknown1433	0.00421867	0.0128369	24	6	913.582	0.0293293	0.160845	20.7529	6.00001	5123.5	0.00123698	0.00471492	22.3765	6.03176	4244.12	540.237	0.127291	4487	4014	4590	4987	5166	5415	5019	4894	3157	3353	3589	3976	4284	3784	3160	3591	4216.62
1094	unknown1441	0.000987235	0.00460639	24	0	1794.64	0.0736037	0.205634	24.2975	6.63e-05	12055.5	0.000765129	0.00337373	24.1488	3.3e-05	9741.34	2510.41	0.257707	11763	9955	13210	13294	9235	8777	9569	9597	6406	6623	8754	8322	11558	11206	7982	9418	9729.31
1101	unknown1448	0.0419656	0.0724237	24	3	487.55	0.157603	0.315936	20	6	3097.75	0.0398064	0.0726651	22	4.675	2669.71	481.314	0.180287	3172	3188	2656	2530	3331	3630	2501	2929	1689	2304	2186	2292	2698	2464	2052	2857	2654.94
1106	unknown1452	0.00267199	0.00936821	18	6	905.804	0.170702	0.332347	20	6	4467	0.0039649	0.0112059	19	6.01667	3656.99	719.422	0.196725	3403	3819	3294	3568	3920	4241	5018	4689	2288	2231	2940	2786	4419	4306	2704	3491	3569.81
1108	unknown1454	0.000987235	0.00460639	18	9	9231.63	0.0845097	0.221238	20	6	38052	0.000866971	0.00367318	19	7.6	26204.7	10720.2	0.409094	15741	12979	19208	18009	41805	30551	36446	43406	14633	25955	24927	26114	21671	20659	8977	24476	24097.3
1110	unknown1456	0.00164724	0.00666594	24	21	1495.88	0.0554699	0.183256	20	17.9999	10016.5	0.000941187	0.00387634	22	19.525	8650.86	1625.91	0.187948	9980	11564	8671	9294	4463	6813	6472	7261	9514	9326	9405	7987	10210	9536	10219	10101	8801
1112	unknown1458	0.00164724	0.00666594	18	0	569.928	0.0701505	0.201033	20	17.9999	3284	0.00116315	0.0044928	19	18.05	2775.52	562.257	0.202577	3360	3909	2802	3189	1521	2214	2204	2382	2956	3104	3086	2500	3351	3148	3390	3247	2897.69
1113	unknown1459	0.00421867	0.0128369	18	0	1422.88	0.0573248	0.185652	24.4321	17.9999	12110.7	0.00225565	0.00738803	21.2161	18.4233	11349.7	1333.86	0.117524	12403	13972	12477	12435	9874	10283	10063	11435	10040	10821	11114	10822	12710	11863	11332	12538	11511.4
1115	unknown1460	1.91e-05	0.00025515	24	0	1419.16	0.0184065	0.159709	24.9858	6.63e-05	5855.74	5.57e-06	8.71e-05	24.4929	3.25e-05	4254.44	1714.59	0.403013	6023	5845	6005	5550	3546	3541	3237	3425	2514	3071	2963	3616	5404	4184	3855	4873	4228.25
1116	unknown1461	0.000572095	0.00320048	24	3	984.293	0.0426346	0.168276	25.7143	7.48e-05	6162.74	0.000283455	0.00168489	24.8571	1.55361	4969.84	1216.9	0.244857	6200	6108	6210	6133	4694	5360	5014	5163	3362	4184	4058	4263	5728	4980	3599	4227	4955.19
1118	unknown1463	0.0419656	0.0724237	18	6	1015.58	0.0805002	0.215964	20	6	4878.75	0.0226018	0.0450994	19	6.01667	3737.3	1176.39	0.314768	2882	3029	3104	3461	4221	5251	5067	4976	2831	2761	3312	3442	3660	4000	2909	2610	3594.75
1120	unknown1465	0.0210199	0.0421957	18	6	413.481	0.0514745	0.179456	20	6	3109	0.00847083	0.0201531	19	6.01667	2685.99	308.835	0.11498	2756	2657	3016	2902	2730	3422	3162	3122	1836	2020	2044	2143	3205	2670	2350	2342	2648.56
1122	unknown1467	8.77e-05	0.00082364	18	6	2233.4	0.0601317	0.188828	20	6.00001	6543.75	6.94e-05	0.000616645	19	6.01667	4371.19	2060	0.471266	3921	4425	3622	2808	5669	7789	6045	6672	2096	2161	2523	2559	4717	3083	2965	4890	4121.56
1124	unknown1469	0.00980952	0.0239973	24	3	805.395	0.0805731	0.216026	21.6708	6.6e-05	3802.75	0.00643609	0.0161555	22.8354	1.42725	3220.58	691.757	0.214793	4279	3205	3905	3822	3891	4277	3329	3425	2000	2576	2539	2711	3618	2285	2684	3278	3239
1126	unknown1470	0.00421867	0.0128369	24	6	869.388	0.0380692	0.167576	20	6.00001	6378.5	0.00156371	0.00563391	22	6.05	4064.53	2046.87	0.503593	3414	3065	3761	3838	4139	7119	7350	6906	2543	2682	2941	3770	3111	3148	2316	2898	3937.56
1127	unknown1471	0.0299489	0.0559443	24	0	1521.52	0.131995	0.282939	26.0177	6.63e-05	7981.99	0.0258266	0.0505101	25.0088	3.19e-05	6091.03	1663.39	0.273089	8857	7921	7791	7359	5558	6949	4332	5448	3996	4792	4628	5533	6929	3919	5191	7471	6042.12
1128	unknown1472	0.0210199	0.0421957	18	6	727.259	0.309355	0.50643	20	6	4812.25	0.0392468	0.0717344	19	6.01667	4154.99	542.53	0.130573	4080	3698	4479	4439	3920	5344	5326	4659	2828	3047	3449	3363	5001	5044	3298	3453	4089.25
1135	unknown1479	0.00421867	0.0128369	24	3	619.426	0.118497	0.265712	22.2166	6.18e-05	4839.25	0.00429968	0.011942	23.1083	1.4443	4121.48	995.226	0.241473	5212	4831	4778	4536	4237	4715	4319	3693	2727	3054	3999	3321	5210	4217	3733	3669	4140.69
1137	unknown1480	8.77e-05	0.00082364	18	0	3797.16	0.0456782	0.170653	23.0287	17.9999	11465	5.38e-05	0.000505187	20.5144	18.2745	8263.25	4015.18	0.485908	11387	10422	13184	13159	4203	4550	5113	5184	6192	6879	7667	8230	12127	15689	8941	9103	8876.88
1141	unknown1484	0.000987235	0.00460639	18	9	1563.77	0.116745	0.262874	20	6	7567	0.00116043	0.0044903	19	7.6	5753.55	1762.29	0.306296	3875	3183	4879	4605	7779	6094	7888	8507	3746	6005	6069	5899	5155	5114	2812	4904	5407.12
1142	unknown1485	0.0419656	0.0724237	24	0	561.089	0.202738	0.375956	24.5682	7.35e-05	6767.24	0.0490636	0.0864302	24.2841	3.63e-05	5715.67	1038.37	0.181671	6321	5451	7777	7520	5872	5792	5504	5318	3706	4231	5423	5598	6082	6272	5001	5433	5706.31
1146	unknown1489	0.000987235	0.00460639	18	9	10984.2	0.0788817	0.212809	20	6	46247.5	0.000814602	0.00352019	19	7.6	32898.5	12248	0.372295	20727	16912	25470	23323	47286	38081	47743	51880	19142	32113	33760	32587	29049	28014	14596	27170	30490.8
1151	unknown1493	0.0144977	0.0319142	18	0	901.561	0.223835	0.403331	20	17.9999	4703.75	0.0218415	0.0440286	19	18.05	3898.33	1004.12	0.257576	5611	6255	3848	4113	1815	2957	2870	2909	4948	3761	4529	3433	4679	4061	6017	4058	4116.5
1152	unknown1494	0.0177588	0.0389345	18	0	3748.37	0.138024	0.291154	26.1721	17.9999	14509	0.0171854	0.0360527	22.0861	18.6379	14275	3051.26	0.213748	18671	17633	21115	17355	13854	13395	10799	11201	10423	11967	13641	14322	15672	11967	12966	17431	14525.8
1154	unknown1496	0.0419656	0.0724237	18	0	1187.59	0.122264	0.270794	20	17.9999	7143.5	0.0321833	0.0610131	19	18.05	6089.86	1252.22	0.205624	7725	8803	6185	6672	2950	4989	4673	4996	7322	6680	6746	5476	7599	6553	7877	6545	6361.94
1161	unknown1501	0.00421867	0.0128369	24	0	829.259	0.120081	0.26712	25.2722	6.63e-05	6237.24	0.00435043	0.0120026	24.6361	3.23e-05	4886.88	1351.03	0.27646	5629	5015	7518	6787	4267	4502	4760	4510	2865	3573	4120	4547	5077	5693	3638	5270	4860.69
1167	unknown1507	0.000987235	0.00460639	18	0	4151.42	0.351207	0.557451	26.9725	18	11850.7	0.00310907	0.00936831	22.4862	18.7462	12162.2	3336.57	0.27434	17482	15871	17776	16913	11178	10931	6263	7973	10224	11293	13304	11427	13760	8058	12477	13108	12377.4
1170	unknown151	0.0144977	0.0319142	24	0	644.881	0.107273	0.252168	20.7529	5.23e-05	4225	0.0116115	0.0261454	22.3765	2.82e-05	3586.89	808.129	0.225301	4207	4743	3680	4270	2747	3817	3933	3851	2417	2723	2752	3153	4233	4622	3421	3621	3636.88
1174	unknown1513	0.0419656	0.0724237	24	0	889.894	0.261361	0.450526	24.0327	6.63e-05	7212.99	0.0604649	0.102482	24.0163	3.31e-05	6217.57	1178.03	0.189469	6637	6842	7794	7579	5002	6565	6480	5766	4463	4696	5990	5720	7262	7810	5457	5408	6216.94
1179	unknown1518	0.0210199	0.0421957	18	6	1890.45	0.105302	0.249565	20	6	8829	0.0157446	0.0338388	19	6.01667	7039.07	1528.79	0.217187	5775	6811	8499	7072	9033	9052	8824	8407	4389	4714	5228	6318	6810	8647	4742	5340	6853.81
1180	unknown1519	0.00164724	0.00666594	18	6	1353.76	0.100368	0.243655	20	6	5858.75	0.00160495	0.00574541	19	6.01667	4539.73	1127.28	0.248314	3830	4500	4418	5249	4871	5622	6687	6255	2913	2504	3066	3189	4552	5604	4508	2682	4403.12
1182	unknown1520	0.0419656	0.0724237	24	3	798.324	0.366136	0.574617	20	6.63e-05	5658.5	0.0795245	0.129354	22	1.37504	4898.06	1618	0.330335	5024	5027	6911	5672	5475	5949	4528	4899	2931	3109	3606	4235	5321	4783	8151	4124	4984.06
1186	unknown1524	0.000572095	0.00320048	24	3	1437.9	0.0663222	0.196625	24.7059	6.58e-05	8800.49	0.000424177	0.0022317	24.3529	1.52209	7268.25	1630.12	0.22428	9571	9106	8961	7564	8205	9055	6576	7155	4878	5805	6303	6323	7502	6452	5692	6995	7258.94
1188	unknown1526	2.22e-07	7.82e-06	18	9	4764.13	0.0181131	0.159709	20	6.00002	15497.2	8.18e-08	3.76e-06	19	7.60001	7010.61	7270.91	1.03713	809	883	726	761	13760	17459	15264	15506	3910	4397	3859	4266	1610	2001	2248	1842	5581.31
1190	unknown1528	0.00421867	0.0128369	24	21	1030.78	0.0558234	0.183256	20	17.9999	3627	0.00220282	0.0072314	22	19.525	2848.18	1027.52	0.360763	3936	4588	3060	3248	722	1739	1377	1627	3702	3133	3223	2226	4000	3260	4017	3231	2943.06
1191	unknown1529	0.00164724	0.00666594	18	9	1940.65	0.11288	0.258539	20	6	9350.75	0.00178319	0.00621676	19	7.6	7649.29	1705.61	0.222976	5708	5814	6257	5941	8994	8663	9126	10620	6006	8884	7355	7320	7575	6797	5246	6718	7314
1198	unknown1535	0.000171384	0.00137171	18	9	13741.7	0.0427641	0.168276	20	6	60391.2	9.4e-05	0.000775158	19	7.6	44701.4	14748	0.329922	30133	28946	32653	31837	58210	56173	59186	67996	33449	47632	42815	40423	39699	35988	26291	37406	41802.3
1200	unknown1537	2.22e-07	7.82e-06	18	9	3859.04	0.0191181	0.159709	20	6	12287.8	8.61e-08	3.76e-06	19	7.6	5470.8	5492.37	1.00394	1104	1010	1083	990	10576	14644	10981	12950	2346	2814	2874	2620	1534	1414	1577	1741	4391.12
1202	unknown1539	0.000572095	0.00320048	24	0	902.268	0.042915	0.168276	23.7736	7.26e-05	5698.99	0.000285159	0.00168531	23.8868	3.64e-05	4586.31	1167.21	0.254498	5580	5904	5647	5665	4448	4768	4258	4725	2937	3510	3613	3712	5410	5607	3771	3896	4590.69
1204	unknown1540	4.22e-05	0.000465917	24	0	1108.92	0.0220513	0.159709	25.2722	6.63e-05	6254.99	1.38e-05	0.000181698	24.6361	3.23e-05	4888.48	1359.72	0.278147	6564	6119	6366	5971	4319	4998	3934	4355	3345	4170	4049	3749	5700	4920	4494	4741	4862.12
1205	unknown1541	2.22e-07	7.82e-06	18	9	91934.5	0.0167386	0.159709	20	5.99998	381929	7.58e-08	3.76e-06	19	7.59999	156625	181737	1.16034	10587	9793	9821	10128	350058	432774	369176	375708	58839	75094	66126	56474	23917	28119	31254	26519	120899
1206	unknown1542	2.22e-07	7.82e-06	18	9	2809.34	0.0171915	0.159709	20	6	10803	7.78e-08	3.76e-06	19	7.6	4913.95	5076.31	1.03304	580	580	568	605	10351	11275	9961	11625	2568	2972	3076	3181	950	1337	1643	1385	3916.06
1207	unknown1543	0.0065055	0.0176718	24	0	2012.07	0.165947	0.326604	25.5652	6.63e-05	13133.2	0.0084543	0.0201248	24.7826	3.21e-05	10678.3	2267.06	0.212305	12898	13346	13727	12562	7686	11949	10582	10363	7357	9513	9097	9003	12878	11994	7773	9275	10625.2
1208	unknown1544	2.22e-07	7.82e-06	18	9	3563.82	0.0207075	0.159709	20	6.00001	9598.25	9.29e-08	3.76e-06	19	7.6	4037.9	4463.7	1.10545	387	380	422	423	7359	11353	9649	10032	1328	1966	1954	1609	855	1011	822	1017	3160.44
1211	unknown1547	2.22e-07	7.82e-06	18	9	3435.48	0.015699	0.159709	20	5.99999	18734.5	7.14e-08	3.76e-06	19	7.59999	7489.81	8910.88	1.18973	432	491	401	518	17183	19949	19630	18176	2434	2819	2694	2697	916	1036	1298	1136	5738.12
1216	unknown1551	2.22e-07	7.82e-06	18	9	4110.41	0.0161786	0.159709	20	5.99998	16837.8	7.34e-08	3.76e-06	19	7.59999	6815.23	8134.41	1.19356	241	269	437	351	15904	15136	17715	18596	1760	3462	3038	2913	780	974	711	1172	5216.19
1217	unknown1552	8.77e-05	0.00082364	18	0	4043.41	0.0225542	0.159709	24.8451	17.9999	8679.23	2.8e-05	0.000310351	21.4225	18.4714	7063.05	3544.94	0.501899	10434	10439	13076	11187	5491	4286	4323	4717	4275	5911	5161	5338	10366	8892	8085	7374	7459.69
1218	unknown1553	8.88e-07	2.07e-05	18	9	5306.48	0.028912	0.160845	20	6.00001	10801.5	4.74e-07	1.21e-05	19	7.60001	4773.33	5054.35	1.05887	324	335	631	585	9402	8779	14721	10304	1630	3072	2711	2769	1052	2021	948	1192	3779.75
1219	unknown1554	4.22e-05	0.000465917	24	0	1073.92	0.043682	0.168276	24.5682	6.63e-05	6315.74	2.62e-05	0.000296658	24.2841	3.28e-05	5045.34	1466.46	0.290656	5822	5752	7185	6504	5018	4384	4235	4307	3135	4277	4039	4297	6409	5285	4627	5238	5032.12
1222	unknown1557	0.0210199	0.0421957	18	6	2587.83	0.0620521	0.191281	20	5.99998	8985.25	0.00996776	0.0228846	19	6.01666	6235.3	2633.38	0.422335	5705	6925	4815	4077	8504	10147	7613	9677	3564	4690	4501	4203	5581	3078	4710	6869	5916.19
1223	unknown1558	2.22e-07	7.82e-06	18	9	3334.72	0.0163235	0.159709	20	6.00002	20365.8	7.41e-08	3.76e-06	19	7.60001	9372.45	9175.8	0.979018	1599	1875	1815	1753	20023	20331	20818	20291	5218	6302	5624	4017	3496	2874	2810	2253	7568.69
1224	unknown1559	0.0065055	0.0176718	18	0	1757.51	0.189476	0.35811	22.9091	17.9999	12498	0.00948956	0.0220439	20.4545	18.263	10838.9	1994.37	0.184001	11423	10773	13893	14557	8724	8925	10134	8545	7932	10477	10281	12729	12798	13103	10849	13242	11149.1
1225	unknown156	8.77e-05	0.00082364	18	6	2380.83	0.052333	0.180403	20	6	6297.75	6.1e-05	0.000560761	19	6.01667	4585.59	1534.14	0.334556	4985	4639	4618	2969	6276	6387	6192	6336	2678	2782	2638	2274	5015	5310	3855	3441	4399.69
1226	unknown1560	0.000171384	0.00137171	24	0	1326.53	0.0434745	0.168276	25.5652	6.63e-05	7766.98	9.54e-05	0.000784036	24.7826	3.21e-05	5966.53	1694.58	0.284014	7165	7030	8758	8115	5180	4828	5124	4956	3871	5107	4816	5485	6510	5752	5321	6811	5926.81
1227	unknown1561	7.77e-06	0.000124608	18	9	3306.96	0.169135	0.330486	20	6	10710.5	1.91e-05	0.000235089	19	7.6	5910.5	4479.79	0.757937	2167	2370	2166	1492	7641	19881	8109	7211	5401	5393	3753	4761	2621	2390	1770	3352	5029.88
1232	unknown1566	8.77e-05	0.00082364	18	9	11939.5	0.0200782	0.159709	20	6.00001	56806.8	2.51e-05	0.000287396	19	7.60001	31927.5	20930.2	0.655554	13246	12349	15971	15276	54808	53359	56093	62967	17428	26348	23573	24109	19042	18986	12839	18615	27813.1
1235	unknown1569	2.22e-07	7.82e-06	18	9	3869.29	0.0163874	0.159709	20	5.99999	20380.5	7.43e-08	3.76e-06	19	7.6	8890.47	9018.52	1.0144	1571	1686	1831	1998	18074	21704	20496	21248	3396	4054	3915	3917	2251	2471	2696	2574	7117.62
1237	unknown1570	2.22e-07	7.82e-06	18	9	2517.3	0.015939	0.159709	20	5.99999	12821	7.24e-08	3.76e-06	19	7.59999	5127.91	6121.19	1.1937	270	240	274	317	11771	13825	13479	12209	1741	1963	1864	1862	583	711	874	811	3924.62
1238	unknown1571	2.22e-07	7.82e-06	18	9	5817.01	0.0159035	0.159709	20	5.99998	25582	7.22e-08	3.76e-06	19	7.59999	10476	12343.1	1.17822	498	449	679	632	24836	23333	25867	28292	3304	5412	4857	4542	1235	1651	1424	1783	8049.62
1239	unknown1572	2.22e-07	7.82e-06	18	9	7644.18	0.0226448	0.159709	20	6	18150.8	1.01e-07	3.89e-06	19	7.6	8911.86	8174.19	0.917225	1899	2367	1862	1438	13520	21219	19016	18848	5629	5739	8245	4959	2863	2536	3235	3505	7305
1240	unknown1573	2.22e-07	7.82e-06	18	9	8689.64	0.0160372	0.159709	20	5.99999	40315.8	7.28e-08	3.76e-06	19	7.59999	16188.2	19238.1	1.1884	953	862	987	977	35956	43604	42570	39133	5544	6533	6204	5702	1812	2414	2703	2549	12406.4
1241	unknown1574	2.22e-07	7.82e-06	18	9	149975	0.0226749	0.159709	20	6.00001	328712	1.01e-07	3.89e-06	19	7.60001	145970	155557	1.06568	14661	14901	14313	14411	231920	384731	345388	352807	82954	91826	85028	69265	26995	35144	44242	37668	115391
1242	unknown1575	1.91e-05	0.00025515	18	0	2164.45	0.0388728	0.167576	24.1644	17.9999	5737.99	1.12e-05	0.000153297	21.0822	18.3931	4477.99	2110.74	0.471359	6481	6073	7417	7004	2561	3247	3360	2137	3564	4017	3609	3523	6282	7405	4656	4609	4746.56
1243	unknown1576	0.000987235	0.00460639	24	0	1340.67	0.0718232	0.203098	25.5652	6.63e-05	10613.2	0.000748356	0.00332688	24.7826	3.21e-05	8894.41	1627.79	0.183013	11200	11752	9706	9795	7975	8818	7096	7898	7639	7663	7424	8539	9983	8234	8987	8991	8856.25
1249	unknown1581	2.89e-06	5.71e-05	18	0	6671.55	0.0540725	0.181664	24.8451	18	14732.7	2.6e-06	4.84e-05	21.4225	18.4715	12657	5677	0.448527	17959	17857	20061	22435	8227	8432	6645	8280	10447	11390	10616	11395	16235	16337	11232	15127	13292.2
1254	unknown1586	0.000171384	0.00137171	24	3	627.557	0.0462606	0.171511	24.8451	4.42e-05	4459.75	0.000101047	0.000819352	24.4225	1.52643	3656.39	906.025	0.247792	4267	4180	4870	4522	3447	3986	3708	3793	2378	3047	2890	3344	4157	3412	2898	3506	3650.31
1257	unknown1589	0.0210199	0.0421957	18	6	1324.76	0.234523	0.416183	20	6.00001	7897.5	0.0311184	0.0591495	19	6.01667	6616.65	1203.98	0.181962	6018	5095	7217	6751	7578	7435	8647	7930	4489	5585	5653	6338	6536	7491	4676	6093	6470.75
1258	unknown159	0.0299489	0.0559443	18	6	796.202	0.253553	0.441001	20	6	4020.75	0.044654	0.0800297	19	6.01667	3120.03	959.564	0.30755	2941	2890	2161	2077	4932	3883	3721	3547	2472	2488	2595	2738	3585	3020	2662	2348	3003.75
1259	unknown1590	0.00164724	0.00666594	24	0	878.227	0.0845912	0.221317	25.5652	6.63e-05	5686.49	0.0013765	0.0051234	24.7826	3.21e-05	4468.33	1176.63	0.263327	4653	5425	6599	6069	3807	3461	3963	4313	2900	3790	3451	4408	4777	4704	3886	4846	4440.75
1261	unknown1592	0.00164724	0.00666594	24	3	701.45	0.0543383	0.181681	23.0287	6.63e-05	6135.75	0.000923831	0.00382793	23.5144	1.46968	5543.75	655.04	0.118158	6517	6066	5868	6092	5617	6078	6052	5777	4410	5053	5009	5107	5853	5609	4827	4866	5550.06
1263	unknown1594	7.77e-06	0.000124608	18	9	4535.38	0.0398889	0.167576	20	6	17408.5	4.95e-06	8.1e-05	19	7.6	11722.1	5138.25	0.438337	7067	7590	7398	6523	13438	21379	16457	18360	9628	10061	11071	9826	8404	6756	9405	8030	10712.1
1266	unknown1597	0.00421867	0.0128369	24	6	761.554	0.0564053	0.18439	20.0911	6	3665.5	0.00222332	0.00729316	22.0456	6.04753	2543.18	875.061	0.344082	2907	2912	2367	2030	3844	4553	2711	3554	1452	2184	1993	1847	2021	1251	1723	2492	2490.06
1267	unknown1598	0.0419656	0.0724237	24	9	530.33	0.111674	0.257127	20	6.00002	4243.75	0.0298203	0.0572349	22	7.42501	3400.87	627.006	0.184366	2893	2397	3179	3326	4224	4506	4103	4142	2649	3082	3486	3442	3037	3727	2505	2874	3348.25
1268	unknown1599	0.000572095	0.00320048	18	9	399.869	0.392806	0.604425	20	6.00001	2478.5	0.00211254	0.00703637	19	7.60001	2129.52	355.551	0.166963	1603	1653	1615	1819	2217	2661	2535	2501	1863	2010	2170	2211	2145	2479	1777	1695	2059.62
1276	unknown1605	7.77e-06	0.000124608	18	9	3389.16	0.029163	0.160845	20	6	10834	3.69e-06	6.45e-05	19	7.6	6100.51	4041.68	0.662516	2543	2764	2180	2146	8916	12082	10747	11591	4431	4565	4507	4130	4129	2653	4433	3079	5306
1279	unknown1608	0.000987235	0.00460639	18	9	4064.27	0.0992643	0.24174	20	6	36013.5	0.00100257	0.00405333	19	7.6	30756.7	4541.2	0.147649	26544	26939	26412	25942	31632	34757	37678	39987	28812	31721	28949	26218	30636	26958	27155	27484	29864
1289	unknown1617	0.0065055	0.0176718	18	9	4310.52	0.213405	0.390221	20	5.99999	13685.8	0.0105229	0.0239056	19	7.59999	9750.82	4186.7	0.429369	3868	4307	5808	6603	10383	14227	15498	14635	7918	8282	10423	11113	7970	13187	4869	3754	8927.81
1290	unknown1618	0.00421867	0.0128369	24	3	777.287	0.092094	0.231463	25.2722	4.87e-05	4053.75	0.00343959	0.0101041	24.6361	1.53978	3121.31	976.836	0.312957	4553	4353	3891	3418	3318	3922	2568	3237	2055	2687	2258	2203	3160	1766	2899	3504	3112
1291	unknown1619	0.0144977	0.0319142	18	0	1607.43	0.740926	0.961982	25.2722	17.9999	16487	0.0594407	0.101131	21.6361	18.5231	16053.4	1392.87	0.0867645	18414	16222	18327	18551	14800	15464	14572	15996	11716	16177	16061	16886	18037	18188	12919	16804	16195.9
1296	unknown1623	0.00421867	0.0128369	18	6	735.391	0.305777	0.502282	20	5.99997	4249.25	0.00987234	0.0227137	19	6.01665	3379.3	860.216	0.254554	2917	3144	2937	2927	3302	3972	4911	4812	2110	2373	2754	2941	3559	4111	2648	2983	3275.06
1301	unknown1628	0.0144977	0.0319142	24	6	423.911	0.196753	0.367374	20.1831	6.00001	2087.75	0.0195667	0.0401155	22.0915	6.04512	1612.15	391.113	0.242603	2024	1783	1427	1141	1965	2545	1860	1981	1131	1717	1347	1275	1260	1062	1098	1807	1588.94
1303	unknown163	0.000987235	0.00460639	18	6	1189.71	0.0268529	0.160598	20	6	3882	0.000305873	0.00176826	19	6.01667	2729.35	1050.9	0.385036	2846	2612	2327	2261	4362	3589	3876	3701	1525	1688	1655	1582	2822	2774	2036	1976	2602
1306	unknown1632	0.0065055	0.0176718	18	6	1174.33	0.170209	0.331769	20	5.99998	7500.75	0.00864335	0.0204512	19	6.01666	6063.93	1404.9	0.231681	5128	5713	5585	5528	6175	7261	8293	8274	4348	4982	5336	4737	6060	7115	4802	4962	5893.69
1307	unknown1633	0.0299489	0.0559443	18	0	472.347	0.186946	0.355814	20	18	3387.25	0.0346299	0.064847	19	18.05	3059.36	480.137	0.15694	3566	4327	3111	3427	1806	2635	2528	2519	3207	3600	3387	2957	3798	3075	3499	3177	3163.69
1311	unknown1637	0.00980952	0.0239973	18	6	949.821	0.109039	0.254247	20	6.00001	4075.75	0.00838628	0.0199849	19	6.01667	2995.38	1095.5	0.365729	2230	2514	2580	2464	3497	3838	4864	4104	1877	2320	2387	2283	2849	3502	2162	2331	2862.62
1313	unknown1639	0.00421867	0.0128369	18	9	744.76	0.107344	0.252197	20	6	6389.75	0.00393976	0.0111425	19	7.6	5584.27	750.753	0.134441	4903	4454	4955	5047	6806	6604	6017	6132	4738	5394	5835	5551	4933	5309	4730	5579	5436.69
1315	unknown1640	7.77e-06	0.000124608	18	0	956.362	0.0425595	0.168276	20	17.9999	4158.75	5.27e-06	8.32e-05	19	18.05	3439.53	907.7	0.263903	4578	4820	3805	4541	1930	2737	2640	2759	3433	3461	3617	3232	4340	4189	4479	3627	3636.75
1316	unknown1641	4.22e-05	0.000465917	18	0	1018.76	0.0664888	0.19692	20	17.9999	4057	3.87e-05	0.000393857	19	18.05	3338.09	991.997	0.297175	4752	5099	3890	4238	1694	2622	2342	2764	3695	3200	3437	2897	4149	3952	4609	3518	3553.62
1317	unknown1642	0.0144977	0.0319142	18	0	3061.6	0.488836	0.711003	20	18	15007.5	0.0421641	0.076367	19	18.05	13013.3	2971.56	0.228347	19421	19410	13355	14405	4946	13240	10284	12305	15828	12762	13772	8786	16103	14193	16642	13092	13659
1324	unknown1649	8.77e-05	0.00082364	24	0	1547.68	0.0357026	0.166866	25.5652	6.63e-05	8062.98	4.28e-05	0.000424189	24.7826	3.21e-05	5931.51	2003.03	0.337692	8659	6712	8578	8303	4269	5084	5201	4956	4079	4948	4511	4629	5784	7127	4999	6314	5884.56
1326	unknown1650	0.00980952	0.0239973	18	9	1328.48	0.182735	0.349659	20	5.99998	9450.75	0.0131288	0.0290484	19	7.59999	6901.64	2080.03	0.301382	5522	4599	5250	5729	8283	7283	13399	8838	4659	7142	6158	5654	6403	5957	3476	5532	6492.75
1334	unknown1658	0.0419656	0.0724237	18	9	1667.71	0.826809	1	20	6	24716.5	0.151319	0.224464	19	7.6	22836.2	1723.06	0.075453	19771	20126	20973	21425	22480	23185	24270	28931	20783	24485	22178	21321	21479	22015	23854	22683	22497.4
1342	unknown1665	8.88e-07	2.07e-05	18	9	15598.4	0.0179793	0.159709	20	6	45418.5	3.03e-07	8.46e-06	19	7.6	16901.2	21856.6	1.2932	398	409	535	303	47211	55863	36462	42138	3358	5053	3263	2998	436	552	733	1962	12604.6
1344	unknown1667	2.22e-07	7.82e-06	18	9	7437	0.016751	0.159709	20	5.99999	25157.8	7.59e-08	3.76e-06	19	7.6	9612.38	12095.4	1.25832	372	295	362	289	25510	29313	20769	25039	2414	3390	2515	2267	504	422	737	1557	7234.69
1348	unknown1670	0.00164724	0.00666594	24	9	971.565	0.0278873	0.160845	20	6	4468.25	0.000504767	0.00251449	22	7.425	3189.45	1161.94	0.364308	2507	2398	2315	2175	4155	4678	4759	4281	3472	3364	3416	2374	2959	2382	2183	2053	3091.94
1350	unknown1672	2.22e-07	7.82e-06	18	9	3621.45	0.0233466	0.159709	20	6	8249.25	1.04e-07	3.92e-06	19	7.6	3984.68	3695.68	0.927472	980	883	852	891	7442	9813	9689	6053	2750	2673	2678	2329	1285	1124	1384	1305	3258.19
1352	unknown1674	0.000987235	0.00460639	18	9	1549.8	0.295663	0.491259	20	6	17601.2	0.00266761	0.00835197	19	7.6	16099.8	1624.84	0.100923	13464	14758	13686	14763	15891	17766	16945	19803	15580	16428	16957	14985	15753	14852	16121	14734	15780.4
1353	unknown1675	2.22e-07	7.82e-06	18	9	1576.85	0.0151955	0.159709	20	5.99999	10536.8	6.92e-08	3.76e-06	19	7.6	4145.61	4956.93	1.19571	269	279	426	372	10341	11441	9857	10508	1184	1633	1301	906	568	496	570	588	3171.19
1354	unknown1676	8.77e-05	0.00082364	18	9	2726.25	0.0197185	0.159709	20	6	11569.2	2.47e-05	0.000283356	19	7.6	7680.38	3562.56	0.463852	4579	4069	4836	5044	11764	12453	11396	10664	6902	7557	7127	5233	5737	4964	4614	4742	6980.06
1356	unknown1678	0.00267199	0.00936821	18	9	1384.52	0.29365	0.489039	24.0327	6	13598	0.00639497	0.0160709	21.0163	7.87756	12468.8	1259.02	0.100973	10570	11485	10687	11319	12036	12754	14573	15029	12030	12844	13876	12224	12655	10950	12151	11693	12304.8
1357	unknown1679	0.0299489	0.0559443	24	9	825.194	0.588355	0.815486	20	6	9237	0.0887847	0.142121	22	7.425	7738.82	1316.77	0.170151	6898	6590	6371	7009	7123	8114	13088	8623	7923	7576	7810	7177	8124	6920	6500	6207	7628.31
1358	unknown168	4.22e-05	0.000465917	18	9	3279.91	0.0265532	0.159895	20	5.99999	9589.25	1.65e-05	0.000207874	19	7.6	4272.26	4065.55	0.951616	890	1103	945	945	8383	8589	8838	12547	1396	1594	1751	2213	2337	1392	1215	1431	3473.06
1359	unknown1680	2.22e-07	7.82e-06	18	9	4114.3	0.0212597	0.159709	20	6.00001	14430.2	9.52e-08	3.78e-06	19	7.6	10033.5	4692.69	0.4677	5553	5196	5626	5805	16497	15019	13548	12657	9996	10371	9821	9209	6814	6162	6614	6889	9111.06
1360	unknown1681	2.22e-07	7.82e-06	18	9	7723.73	0.0222636	0.159709	20	6	19902.8	9.95e-08	3.89e-06	19	7.6	10648.5	9077.05	0.852427	2878	2087	1931	2909	21183	20027	23517	14884	7269	9117	10260	9970	3626	3456	5042	3670	8864.12
1361	unknown1682	2.22e-07	7.82e-06	18	9	2361.38	0.0247317	0.159709	20	6	6527.75	1.1e-07	4.1e-06	19	7.6	4115.91	2699.16	0.655788	1706	1276	1145	1673	5545	7606	7303	5657	3725	3918	4511	4589	2057	2067	2643	1944	3585.31
1362	unknown1683	0.00980952	0.0239973	24	21	1692.64	0.0891329	0.226893	21.0501	17.9999	13204.7	0.00703156	0.0173288	22.5251	19.4853	11310.5	1842.94	0.162941	11781	12340	11693	12957	9431	9703	8280	8185	10256	12151	11202	12150	14066	12092	10776	15885	11434.2
1363	unknown1684	0.000987235	0.00460639	24	21	1294.54	0.0511918	0.179456	21.253	17.9999	10735.5	0.000550503	0.00266535	22.6265	19.4807	9168.79	1446.22	0.157733	10232	9005	9710	10034	7518	7911	6916	6528	8972	9700	9168	9507	11527	9718	9225	12472	9258.94
1366	unknown1687	0.00267199	0.00936821	24	21	1943.13	0.113624	0.259021	23.0287	17.9999	11715	0.00276272	0.00856065	23.5144	19.4773	10055.5	2001.06	0.199001	12160	12553	9107	10700	7455	9362	7184	8313	10397	8990	9439	9049	12233	9479	13394	11754	10098.1
1367	unknown1688	0.0065055	0.0176718	24	21	1495.35	0.119766	0.26712	21.253	18	9482.49	0.00635568	0.016	22.6265	19.4807	8053.29	1532.51	0.190296	10298	9630	7222	8551	5672	6853	5930	6534	9078	7364	7591	7728	9841	7589	11081	9419	8148.81
1382	unknown1700	0.0065055	0.0176718	18	6	21588.3	0.0576221	0.186475	20	6	82144.8	0.00333212	0.00984179	19	6.01667	62383	19440.1	0.311625	61541	55934	51849	48305	78759	84438	84195	81187	47999	50330	46330	46881	71486	59293	43227	48682	60027.2
1390	unknown1708	0.00980952	0.0239973	18	6	1270.67	0.537644	0.763279	20	6	8625.5	0.0329361	0.0622494	19	6.01667	7534.85	994.178	0.131944	6849	7404	7815	6858	7823	8016	9694	8969	4807	5947	6024	6687	8879	9766	5881	7211	7414.38
1400	unknown1717	0.000572095	0.00320048	18	9	213187	0.0218997	0.159709	20	6	525092	0.000153946	0.00112599	19	7.6	194213	250724	1.29097	11888	10816	3312	1012	617209	642594	361163	479404	55635	57323	22048	11250	24086	1651	8396	11035	144926
1401	unknown1718	0.000572095	0.00320048	24	0	521.491	0.046453	0.171916	24.1644	6.05e-05	3874.25	0.000306563	0.00176989	24.0822	3.01e-05	3133.35	764.999	0.244147	3530	3656	4370	3941	2903	3167	3146	3134	1976	2574	2536	2515	3237	3852	2589	2975	3131.31
1407	unknown1723	0.0065055	0.0176718	24	3	695.616	0.112133	0.257853	20.2759	6.63e-05	4773.5	0.00599866	0.0152194	22.1379	1.38366	4232.2	786.898	0.185931	4955	4833	5299	4007	5084	4564	4586	4794	2473	3712	3648	3619	4746	4497	3354	4153	4270.25
1409	unknown1725	0.0419656	0.0724237	18	6	4170.87	0.147977	0.303094	20	6	23924.2	0.0377664	0.0695866	19	6.01667	19724.6	3875.35	0.196473	21175	18700	17735	17485	23350	22840	26145	23362	15535	15317	15366	16540	23796	20860	15323	14550	19254.9
1410	unknown1726	0.00421867	0.0128369	24	0	450.25	0.0740375	0.206162	26.0177	6.63e-05	4033.75	0.00283337	0.0087134	25.0088	3.19e-05	3417.08	551.038	0.16126	3826	4081	4265	3963	3150	3346	3030	3442	2545	3000	3026	3316	3832	3226	2871	3495	3400.88
1412	unknown1728	0.000987235	0.00460639	18	9	24252.7	0.024238	0.159709	20	6	73729.5	0.000278539	0.00167046	19	7.6	33165.8	30860.4	0.930487	8852	10235	6845	6566	58900	90355	73223	72440	15403	14539	14752	9700	15330	10050	14997	11403	27099.4
1417	unknown1732	0.0299489	0.0559443	18	9	3136.37	0.0174226	0.159709	20	6	32298.8	0.00446561	0.0122304	19	7.6	13574.7	13843.7	1.01982	4116	4450	2079	1145	30995	32185	33064	32951	5504	4795	3511	2409	6629	1887	4348	3586	10853.4
1418	unknown1733	0.0299489	0.0559443	18	9	2573.87	0.0168904	0.159709	20	6	18944.8	0.00434488	0.0120026	19	7.6	7447.25	8414.58	1.12989	1595	1533	807	453	20338	18984	19551	16906	2010	1700	1482	773	2652	993	1762	1151	5793.12
1420	unknown1735	0.0144977	0.0319142	18	6	839.336	0.155341	0.312559	20	6.00001	4086.75	0.0159806	0.0342725	19	6.01667	3255.2	790.786	0.24293	2473	3258	3145	3095	3969	3913	4428	4037	2059	2383	2765	2818	3335	3992	2381	2499	3159.38
1421	unknown1736	0.0210199	0.0421957	18	9	5800.93	0.0160301	0.159709	20	6	76957.8	0.00303106	0.0092361	19	7.6	30635.6	34166.5	1.11526	6799	7553	3307	1832	75290	75505	78644	78392	10090	8210	6063	3869	10919	3266	7186	5782	23919.2
1422	unknown1737	0.0144977	0.0319142	18	9	7458.56	0.0166237	0.159709	20	6	45233.8	0.00224875	0.007371	19	7.6	16907.1	20699.6	1.22431	2386	2193	875	416	49772	44488	47451	39224	3220	2718	1992	966	4033	1399	2677	1599	12838.1
1423	unknown1738	0.000987235	0.00460639	18	9	1885.85	0.52361	0.746921	20	5.99999	8581.5	0.00442882	0.0121757	19	7.59999	3405.35	4122.27	1.21053	195	162	270	255	22619	2027	4853	4827	173	1744	1021	1978	473	418	185	320	2595
1424	unknown1739	0.000171384	0.00137171	18	9	9536.4	0.416647	0.630129	20	6	42577	0.000753135	0.00333785	19	7.6	15480.1	20290	1.31071	442	439	554	335	108831	13960	27415	20102	522	4059	1802	2496	1070	815	413	610	11491.6
1427	unknown1741	0.0144977	0.0319142	18	6	2381.18	0.142601	0.296022	20	6	11078.5	0.0148469	0.0322441	19	6.01667	8741.78	2292.3	0.262224	9326	7933	6813	7107	10420	10393	12573	10928	7033	7018	6239	7162	10217	8911	6250	7101	8464
1428	unknown1742	0.0144977	0.0319142	24	6	855.599	0.0155704	0.159709	20	6	17142.2	0.00212104	0.00705383	22	6.05	6283.18	10148.2	1.61514	2511	2022	1536	2210	18620	19635	15425	14889	1619	1870	1762	1613	1980	1194	2262	1311	5653.69
1429	unknown1743	0.00267199	0.00936821	24	6	39431.8	0.0153464	0.159709	20	6	690393	0.000455235	0.00233551	22	6.05	243900	416061	1.70587	94604	84149	56470	65851	758201	782285	669650	551437	56374	63010	57812	44789	60378	38863	68567	37031	218092
1430	unknown1744	0.0144977	0.0319142	18	6	494170	0.0189155	0.159709	20	6	1.03184e+06	0.00252336	0.00803392	19	6.01667	409268	628383	1.53538	140499	110511	99987	133685	1118909	1039520	1215526	753392	60248	102912	72623	50119	85687	89295	169127	87893	333121
1431	unknown1745	0.00164724	0.00666594	18	6	33734.3	0.0200309	0.159709	20	6	76417	0.000373483	0.0020338	19	6.01667	31050.2	45934.1	1.47935	10376	10003	7752	10321	85158	77905	88780	53825	6643	7693	7105	5794	8323	8435	12498	7132	25483.9
1432	unknown1746	0.0419656	0.0724237	18	6	1.75634e+06	0.0194891	0.159709	20	6	3467340	0.00663196	0.0165608	19	6.01667	1.31389e+06	2.18739e+06	1.66481	259972	184759	199839	462051	2655186	3545667	4344625	3323882	199093	193996	216002	166420	231536	198413	493119	106657	1.04883e+06
1434	unknown1748	0.0419656	0.0724237	24	18	962.196	0.107028	0.251866	20	17.9999	9007.5	0.0287707	0.0555156	22	18.15	8165.43	996.335	0.122019	8636	9880	7819	7939	6877	6472	6845	7165	7158	9283	8707	9119	9325	9253	8955	8497	8245.62
1435	unknown1749	0.0210199	0.0421957	24	3	500.101	0.221706	0.400939	22.5575	6.63e-05	5061.5	0.0296796	0.0570407	23.2788	1.45496	4438.01	779.506	0.175643	5465	5444	4781	4556	4666	4817	4387	4710	2874	4035	3884	4135	5151	4180	3395	4716	4449.75
1440	unknown1753	0.00164724	0.00666594	18	6	8463.01	0.0490561	0.176258	20	6	25329.2	0.00084229	0.00358615	19	6.01667	11246.1	14218.8	1.26433	4509	5074	4133	5098	36931	19322	30178	14886	3125	2852	4017	4148	5158	4871	4671	3396	9523.06
1441	unknown1754	0.00164724	0.00666594	18	6	11387.6	0.0610699	0.189557	20	6	35860.5	0.00102653	0.00410801	19	6.01667	14961.7	21222	1.41842	4522	5332	4346	5311	54104	24954	45007	19377	3242	3303	4100	4729	6178	4784	5319	3632	12390
1442	unknown1755	0.000987235	0.00460639	18	6	4302.04	0.060881	0.189557	20	6	13413.2	0.000644279	0.0029773	19	6.01667	6192.99	7251.5	1.17092	2502	3577	2797	2937	20169	9404	16106	7974	1884	1754	2218	2613	2947	2969	3104	2073	5314.25
1443	unknown1756	0.00267199	0.00936821	18	6	14029	0.0546104	0.182066	20	6	39934	0.00143474	0.005272	19	6.01667	17426.4	22534.9	1.29315	7280	8530	6032	8265	59497	27922	48694	23623	3700	3528	5421	5089	8683	7097	7254	4515	14695.6
1461	unknown1772	0.0299489	0.0559443	18	9	217.789	0.657106	0.88276	20	6	1729.25	0.0969846	0.152891	19	7.6	1500.29	222.767	0.148482	1018	1368	1081	1374	1502	1877	1588	1950	1269	1301	1515	1679	1493	1246	1620	1423	1456.5
1462	unknown1773	0.0419656	0.0724237	24	15	3593.87	0.150133	0.305344	20	12	22420	0.0382256	0.0701938	22	13.475	17111.8	6967.25	0.407162	16367	19029	10403	14935	10470	17282	11358	15760	21471	20825	24129	23255	19419	12165	15047	18875	16924.4
1463	unknown1774	0.0299489	0.0559443	24	15	4991.11	0.123109	0.271555	20	12	28892	0.024345	0.047959	22	13.475	22083.3	8742.67	0.395895	20498	24224	14131	18334	12992	21687	14488	20539	26308	26627	31636	30997	26000	16918	19663	24529	21848.2
1474	unknown1784	0.0419656	0.0724237	18	15	14629.7	0.0882058	0.22571	20	12	51396.8	0.0244269	0.0480765	19	13.6167	43468.8	14795.7	0.340375	46675	53449	36979	48188	23844	33350	22052	26142	46988	47237	51332	60030	65452	39136	45055	47300	43325.6
1475	unknown1785	0.0299489	0.0559443	24	15	3293.35	0.175777	0.339147	20	12	20109.2	0.0328852	0.0622076	22	13.475	15391.6	5790.92	0.37624	13893	15554	8218	12641	10359	17528	10376	14658	18514	18276	21867	21780	18587	10893	14310	16319	15235.8
1478	unknown1788	0.0144977	0.0319142	18	6	261.806	0.856653	1	20	5.99999	1216.5	0.0669224	0.111623	19	6.01666	1004.1	244.764	0.243765	721	886	677	877	1046	1231	1306	1283	782	743	787	1015	1091	965	1292	889	974.438
1484	unknown1793	0.00421867	0.0128369	24	12	899.617	0.0602943	0.188828	20.2759	12	5018	0.00235965	0.0076534	22.1379	12.0855	3657.8	1425.37	0.389679	2646	3083	2330	2621	2795	4436	2896	3597	4328	4627	5031	6086	3886	2536	3153	3206	3578.56
1486	unknown1795	0.000987235	0.00460639	24	6	217.082	0.0145411	0.159709	20	6	28453.5	0.000174439	0.00121434	22	6.05	8517.15	18787.6	2.20585	465	369	317	407	30304	27962	29953	25595	362	274	409	245	328	238	326	74	7351.75
1487	unknown1796	0.00267199	0.00936821	24	6	222.385	0.0148321	0.159709	20	6	29728.8	0.000441329	0.00227534	22	6.05	8853.45	19664	2.22105	423	324	297	315	26013	31670	31731	29501	259	188	376	175	306	211	288	62	7633.69
1488	unknown1797	0.00421867	0.0128369	18	6	4706.68	0.0382479	0.167576	20	6	10963.2	0.00157029	0.00564732	19	6.01667	3682.41	7430.9	2.01794	59	41	50	140	6672	10267	17391	9523	38	16	22	23	58	40	151	20	2781.94
1489	unknown1798	0.00980952	0.0239973	18	6	4829.89	0.0296479	0.160845	20	6	10839	0.002659	0.00833707	19	6.01667	3638.54	7348.87	2.01973	64	41	32	138	6853	10634	15979	9890	23	21	24	24	29	39	161	16	2748
1492	unknown180	0.0210199	0.0421957	18	6	279.307	0.0920198	0.231463	20	6	3731	0.0140195	0.0306587	19	6.01667	3428.97	270.022	0.0787471	3537	3333	3179	3527	4083	3568	3613	3660	3065	3203	3146	3216	3432	3209	3441	3128	3396.25
1493	unknown1800	0.0144977	0.0319142	24	18	1416.16	0.195751	0.366293	21.4599	17.9999	6843.75	0.0194816	0.0400167	22.7299	18.0563	5408.94	1297.12	0.239809	4708	6073	5512	5074	2957	3002	2927	5496	4034	6056	6144	8172	6727	5343	6684	8621	5470.62
1494	unknown1801	0.000572095	0.00320048	24	12	729.027	0.0429375	0.168276	22.5575	12	3659.25	0.000285295	0.00168531	23.2788	12.0115	2656.23	1039.78	0.391447	1776	2106	1598	1594	1956	2626	2301	3632	3117	4056	3676	3788	2507	2300	2279	2804	2632.25
1495	unknown1802	8.77e-05	0.00082364	24	21	4110.06	0.0232778	0.159709	21.995	18	11094	2.88e-05	0.000317152	22.9975	19.4716	7485.94	4322.27	0.577385	9449	11456	11129	8479	2089	2762	2743	4066	4729	6656	6544	8400	10154	9995	10123	14104	7679.88
1498	unknown1805	0.00267199	0.00936821	24	12	874.514	0.182816	0.349659	24.9858	12	4868.75	0.00421278	0.0117397	24.4929	12.0049	4003.65	1146.19	0.286286	2623	3411	2616	3018	3488	4387	3850	6282	4451	4554	5064	5406	3929	2849	4339	4090	4022.31
1499	unknown1806	0.00980952	0.0239973	24	15	5850.96	0.0887559	0.226466	23.3952	12	22684.8	0.00700551	0.0172843	23.6976	13.4831	17508.5	5706.25	0.325913	12082	15732	10981	11674	11605	14521	13200	21902	21987	21785	21823	25144	22693	13897	20880	19752	17478.6
1500	unknown1807	8.88e-07	2.07e-05	18	9	3999.04	0.0462645	0.171511	23.2718	6.00001	11006.2	7.4e-07	1.84e-05	20.6359	7.81918	7467.73	4015.55	0.53772	2920	3933	2905	2976	8839	11150	9568	14468	9235	7741	8652	7618	5949	4076	5471	4675	6886
1501	unknown1808	0.0419656	0.0724237	24	21	819.537	0.2864	0.481224	22.3291	17.9999	4468.25	0.065158	0.109185	23.1646	19.4712	3452.39	916.979	0.265607	3559	4588	2670	4013	1223	1881	1790	4203	3140	2610	4245	3988	4284	3669	4423	5497	3486.44
1504	unknown1810	0.0419656	0.0724237	18	9	19853.4	0.798418	1	20	6	56161.5	0.147294	0.219169	19	7.6	39511.7	16321.3	0.413075	17155	20005	25946	12183	60727	72153	51766	40000	11143	35424	29783	65645	64807	17047	29526	27542	36303.2
1508	unknown1814	0.0144977	0.0319142	18	9	340355	0.570443	0.796695	24.0327	5.99999	906818	0.0479262	0.0848408	21.0163	7.87755	651664	287876	0.441755	446861	157380	479024	202920	1176451	908591	755261	786970	98682	819629	704215	1252297	653913	496989	234571	652647	614150
1509	unknown1815	0.0210199	0.0421957	18	9	1610.08	0.566418	0.79218	20	5.99999	4468.5	0.0646582	0.108473	19	7.6	3182.9	1509.05	0.474112	2118	667	2035	778	6512	4272	3151	3939	599	3699	3155	5594	3389	2444	1193	2635	2886.25
1510	unknown1816	0.0144977	0.0319142	18	9	2538.34	0.504917	0.72549	24.2975	6	6675.25	0.0433143	0.0778865	21.1488	7.89841	4859.47	2125.96	0.437488	3177	1237	3641	1516	8182	6666	5909	5944	963	6214	5374	9326	4836	3651	1869	4992	4593.56
1511	unknown1817	0.000987235	0.00460639	18	6	12281	0.0618254	0.190828	20	6	33988.8	0.000653334	0.00301271	19	6.01667	13735.9	20316.1	1.47905	4159	5086	4231	5412	53287	21691	41672	19305	1700	1757	2521	2938	4837	4424	4414	2950	11274
1522	unknown1827	0.00980952	0.0239973	18	0	1743.02	0.989815	1	27.8233	17.9999	4312.49	0.0547102	0.0944934	22.9117	18.867	5946.95	6453.44	1.08517	53099	3616	2291	5861	900	744	1271	1402	1049	9777	911	1727	2084	1393	11973	1800	6243.62
1524	unknown1829	0.0210199	0.0421957	18	0	4679.28	0.610371	0.834356	25.5652	6.63e-05	16077.4	0.0687168	0.114089	21.7826	2.83e-05	7331.34	6081.84	0.829567	10444	35502	10274	8090	1883	8202	2255	3038	2368	2496	2002	4905	3849	6476	20055	4050	7868.06
1530	unknown1834	0.0419656	0.0724237	24	12	11042.9	0.422684	0.63682	22.1053	12	41022.2	0.0892591	0.142564	23.0526	12.0203	21992.7	21046.5	0.956977	2747	4286	14241	2632	40098	18085	2302	31103	15251	19057	52472	77309	15872	11376	24702	10249	21361.4
1535	unknown1839	0.0144977	0.0319142	24	21	733.977	0.846847	1	24.5682	17.9999	6560.73	0.0662977	0.110837	24.2841	19.5202	4249.8	2462	0.579322	3102	12024	2577	3005	2035	2529	2478	2725	1920	2716	2989	3182	3079	5989	13462	3713	4220.31
1538	unknown1841	0.0419656	0.0724237	24	12	809.284	0.426963	0.641036	24.5682	12	3375.75	0.0899823	0.143349	24.2841	12.0016	2473.33	1047.64	0.423575	1200	1485	2220	1018	3905	2489	1247	3273	1832	2856	4162	4653	2474	2013	3085	1818	2483.12
1543	unknown1846	0.0210199	0.0421957	24	0	1357.47	0.839752	1	26.4865	6.63e-05	7674.97	0.0889093	0.142259	25.2432	3.16e-05	3594.19	3280.05	0.912598	2939	19925	4315	3521	764	1493	1136	2888	1088	1406	819	2344	1499	2743	7636	1144	3478.75
1546	unknown1849	0.0299489	0.0559443	24	15	451.664	0.215653	0.392838	20	12	2905.25	0.0390249	0.0715099	22	13.475	1243.52	2108.47	1.69557	143	188	849	141	1155	689	120	822	1394	919	5023	4285	783	462	1283	733	1186.81
1552	unknown1854	0.00421867	0.0128369	18	9	691.904	0.192734	0.361899	20	6	2991.5	0.0065979	0.0164852	19	7.6	2160.22	798.537	0.369655	1358	1389	1782	1104	3386	3840	1577	3163	1963	1561	2092	2358	1562	1813	1692	1412	2003.25
1557	unknown1859	0.0144977	0.0319142	24	15	1980.08	0.238362	0.421786	20	12	10644.5	0.0230417	0.0457874	22	13.475	5363.42	6536.38	1.2187	1204	1306	4922	914	5460	3803	1563	4070	6813	4526	19475	11764	4096	2876	6605	3605	5187.62
1561	unknown1862	0.0210199	0.0421957	24	12	3629.58	0.141127	0.294425	20	12	13447.8	0.0202325	0.0412849	22	12.1	5498.93	8437.13	1.53432	872	584	2469	527	5473	1760	309	7203	6312	9562	25047	12870	898	2396	1774	1963	5001.19
1566	unknown1867	0.0299489	0.0559443	24	12	732.739	0.28506	0.479857	20	12	3926.75	0.0492029	0.0865699	22	12.1	1373.22	2615.26	1.90447	164	107	328	104	740	203	71	1195	1682	2967	8956	2102	89	372	158	265	1218.94
1570	unknown1870	0.0299489	0.0559443	24	12	25668.2	0.124536	0.273443	20	12	81558.2	0.0245842	0.0483202	22	12.1	37675.4	47943.1	1.27253	12960	7416	18256	6914	40515	15887	6881	59576	49822	77205	140342	58864	7165	24810	12450	18490	34847.1
1589	unknown1888	0.0210199	0.0421957	24	21	642.937	0.939261	1	26.3284	17.9999	6445.73	0.097234	0.153211	25.1642	19.6113	3945.62	1912.35	0.484676	5128	4046	2867	3003	2584	2045	2853	2388	2378	2717	2736	3168	2927	2977	16011	3868	3856
1594	unknown1892	0.00267199	0.00936821	18	6	2793.78	0.021727	0.159709	20	6	7153	0.000624325	0.00290368	19	6.01667	4063.68	3088.85	0.760111	2389	3216	2230	2984	8001	7473	7205	5933	2403	1862	2162	2322	3355	2619	2607	2269	3689.38
1597	unknown1895	4.22e-05	0.000465917	18	6	9332.75	0.0247114	0.159709	20	6	23866.8	1.54e-05	0.000196694	19	6.01667	11759.5	12281	1.04435	5620	6478	5601	5860	28947	24022	24533	17965	5053	4950	4862	4533	6909	7590	6272	5145	10271.2
1598	unknown1896	4.22e-05	0.000465917	18	6	7847.82	0.0307288	0.161456	20	6	20308.5	1.89e-05	0.000233409	19	6.01667	9089.67	11393.6	1.25346	3761	4025	3177	3496	26910	20343	20294	13687	3069	2742	2752	2491	4901	4702	4031	2963	7709
1599	unknown1897	0.00980952	0.0239973	18	9	2557.07	0.039448	0.167576	20	5.99998	10163.5	0.00342743	0.0100752	19	7.59999	6180.05	3307.16	0.535134	3420	5551	2229	3369	12573	8806	9807	9468	2787	4667	6998	4423	3703	4017	3704	2957	5529.94
1604	unknown1900	0.0144977	0.0319142	18	6	2810.93	0.06227	0.191634	20	6	8023.5	0.00723125	0.01772	19	6.01667	5099.92	3077.96	0.60353	3427	3604	3002	3164	8576	7106	9297	7115	2953	2900	3794	4343	3687	3697	5639	3327	4726.94
1606	unknown1902	0.0210199	0.0421957	18	6	7235.47	0.0580563	0.186902	20	6	24163.5	0.00940711	0.0218758	19	6.01667	11349	13162.5	1.1598	4589	5411	4203	4533	37005	24052	21100	14497	5667	4466	4734	4338	6193	5630	5138	4507	9753.94
1607	unknown1903	4.22e-05	0.000465917	18	6	3476.49	0.0345181	0.166866	20	6	9715.75	2.1e-05	0.000252873	19	6.01667	5113.46	4674.52	0.914159	2773	3017	2686	2842	11933	9939	10001	6990	1914	2633	2367	2257	3418	3653	3779	2550	4547
1608	unknown1904	0.0144977	0.0319142	18	6	1667	0.111345	0.25689	20	6	5433.5	0.0119921	0.0269045	19	6.01667	3500.93	2014.49	0.575415	2350	2966	1894	2216	6197	4288	6434	4815	1616	2166	2522	2846	2481	3284	3934	2100	3256.81
1633	unknown1927	4.22e-05	0.000465917	24	21	2110.01	0.0382578	0.167576	24.2975	17.9999	7766.23	2.31e-05	0.000268574	24.1488	19.5099	5686.71	2220.29	0.390436	6661	8143	4991	6153	3038	4782	3677	3494	5792	3685	4792	4490	8768	6914	8430	6953	5672.69
1641	unknown1934	0.0499351	0.0858693	24	0	127.279	0.434047	0.64987	23.2718	6.63e-05	751.499	0.104722	0.163216	23.6359	3.37e-05	603.029	189.565	0.314354	630	1031	457	888	611	413	611	623	426	443	457	431	770	564	838	493	605.375
1651	unknown1943	0.0419656	0.0724237	18	6	515.127	0.943689	1	20	5.99999	3378.5	0.167473	0.245318	19	6.01666	2584.6	910.134	0.352137	1702	1810	2053	1673	3065	1790	3631	5028	1622	2210	1760	2361	2979	2849	2248	2808	2474.31
1654	unknown1946	0.0144977	0.0319142	18	6	336.76	0.977635	1	28	6.63e-05	6039.98	0.0745012	0.122332	23	3.83336	3580.62	1049.71	0.293166	2502	2724	2873	16061	3382	3009	3056	2977	2183	2836	2108	2439	2906	2806	2684	2868	3588.38
1657	unknown1949	0.00164724	0.00666594	18	6	5266.88	0.117287	0.263779	20	6	21901.8	0.0018454	0.00638226	19	6.01667	10607.3	11521.6	1.08619	5822	5532	4642	3809	37558	20273	18535	11241	5401	4202	4456	3776	6603	4552	6136	4840	9211.12
1660	unknown1951	0.0065055	0.0176718	18	9	1109.1	0.0217902	0.159709	20	5.99999	5918.5	0.00139791	0.00518232	19	7.6	3971.64	1549.42	0.39012	2980	2846	2920	2576	6558	5480	5714	5922	2250	3529	3356	3520	3059	2809	2111	3043	3667.06
1665	unknown1956	0.0419656	0.0724237	24	18	726.906	0.710737	0.933554	27.3065	17.9999	4196.99	0.134588	0.203054	25.6533	18.075	1941.41	1674.05	0.862285	1448	1027	334	2245	475	352	618	574	744	1742	2243	1254	10691	1109	3309	1679	1865.25
1676	unknown1966	0.00267199	0.00936821	24	18	1044.75	0.660088	0.885983	28	17.9999	4932.98	0.0129465	0.0287184	26	18.1071	2120.59	1747.69	0.824153	1959	631	288	670	381	388	576	587	1020	1838	2991	1382	12733	1184	3727	2088	2027.69
1685	unknown1974	0.00164724	0.00666594	24	18	1348.28	0.596994	0.823576	28	17.9999	5734.98	0.00779291	0.018809	26	18.1071	2491.98	2097.2	0.84158	2499	766	447	829	384	486	676	703	1172	2435	2883	1868	14319	1614	4340	2667	2380.5
1689	unknown1978	4.22e-05	0.000465917	18	0	1594.88	0.0397229	0.167576	20	17.9999	5186.24	2.4e-05	0.000276645	19	18.05	4041.76	1558.17	0.385517	6106	5739	5871	5609	1905	3351	2397	1986	4857	3734	3932	3853	4752	4604	5753	5636	4380.31
1694	unknown1982	0.00421867	0.0128369	24	18	1303.2	0.559557	0.784612	28	17.9999	5273.98	0.0166394	0.0352488	26	18.1071	2420.39	1940.19	0.801605	2698	821	442	1114	450	561	781	765	1125	2412	3043	1768	12620	1746	4114	2616	2317.25
1706	unknown1993	0.00980952	0.0239973	24	18	1412.45	0.61025	0.834356	27.8233	17.9999	5629.98	0.0366257	0.0679183	25.9117	18.0985	2642.17	2048.19	0.775193	3098	806	484	1244	487	645	841	824	1407	2452	3483	2304	13864	1793	4022	2841	2537.19
1707	unknown1994	0.00421867	0.0128369	24	18	1494.82	0.549769	0.775408	27.1385	17.9999	5390.48	0.0163893	0.0348725	25.5692	18.068	2637.78	2007.01	0.76087	3546	1121	460	1232	496	537	816	836	1301	2752	3822	2325	12653	1767	4186	2956	2550.38
1711	unknown1998	0.00164724	0.00666594	24	18	1465.83	0.584902	0.811478	27.1385	17.9999	5499.23	0.00765477	0.0185479	25.5692	18.068	2717.04	2044.4	0.752438	3710	1218	602	1245	493	598	926	965	1383	2555	3764	2592	13052	1781	4023	3141	2628
1713	unknown2	4.22e-05	0.000465917	18	6	765.797	0.140404	0.293837	20	6	3477.25	7.72e-05	0.00066595	19	6.01667	2735.59	712.991	0.260635	2594	2721	2216	2283	2833	3468	3829	3779	1874	2050	2182	1637	2961	2896	2811	2253	2649.19
1714	unknown20	0.0299489	0.0559443	24	6	5594.81	0.355107	0.561513	22.5575	6	39816	0.0589566	0.100505	23.2788	6.00577	34168.1	2569.43	0.0751998	34737	34455	31671	51726	38390	48789	35124	36961	23490	30390	31172	30780	34808	24624	25583	33036	34108.5
1718	unknown2002	0.00267199	0.00936821	24	0	581.949	0.0872411	0.225124	20	4.18e-05	1928.5	0.00218282	0.00719301	22	2.3e-05	1485.6	630.055	0.424107	1893	2413	1383	2025	991	1537	1212	1970	750	979	957	841	2250	1824	1748	1787	1535
1719	unknown2003	0.0065055	0.0176718	24	18	1441.26	0.344793	0.550094	25.7143	17.9999	5016.99	0.0159255	0.0341711	24.8571	18.0214	2910.77	1706.87	0.586399	4211	1846	1032	1946	842	1074	1263	1208	2184	3046	3918	3235	9844	2503	4197	3524	2867.06
1736	unknown2019	0.0065055	0.0176718	18	9	910.4	0.392089	0.60375	20	6	4777	0.0177821	0.037071	19	7.6	3978.7	832.741	0.2093	3227	2876	3064	3126	4797	4638	4963	4710	3233	4289	3877	4169	3681	4988	1969	3433	3815
1742	unknown2024	0.00267199	0.00936821	18	9	836.861	0.0355545	0.166866	20	6	4938.75	0.000974868	0.00398057	19	7.6	3516.77	1083.65	0.308137	2706	2782	2885	2474	6083	4158	4770	4744	2627	2915	2939	2919	2887	2826	2322	2823	3303.75
1757	unknown2038	0.0144977	0.0319142	18	9	2369.16	0.162929	0.322285	20	6	7454.5	0.0166485	0.035251	19	7.6	4583.87	2717.75	0.592893	1408	4660	1232	1628	7479	6925	7305	8109	2611	2175	2356	8831	2520	2031	3493	2031	4049.62
1768	unknown2048	0.0299489	0.0559443	18	15	1459.82	0.49661	0.717252	20	12	10551.2	0.0774615	0.126521	19	13.6167	9025.04	2017.43	0.223537	9450	9322	9331	8714	7289	7262	7754	7937	8637	9981	11881	11706	9160	8929	6252	10483	9005.5
1775	unknown2054	0.0299489	0.0559443	24	12	10335.8	0.551945	0.777136	20	12	31316	0.0843463	0.13587	22	12.1	14570	18334.6	1.25838	112	40	31640	1864	7423	2402	17295	14693	20260	7741	47488	49775	662	11573	301	2544	13488.3
1776	unknown2055	0.0419656	0.0724237	24	12	2863.43	0.518888	0.74078	20	12	8702.5	0.105109	0.163596	22	12.1	4232.27	4970.04	1.17432	264	288	8423	790	2503	919	5490	4349	5727	2485	12855	13743	405	3391	311	1082	3939.06
1793	unknown2070	0.00267199	0.00936821	18	6	303.702	0.0251229	0.159709	20	6	841.25	0.000712158	0.00319549	19	6.01667	484.87	355.832	0.733872	280	340	382	319	1041	689	853	782	217	289	285	293	320	350	341	287	441.75
1797	unknown2074	0.000572095	0.00320048	18	6	1294.71	0.025384	0.159709	20	5.99998	2923.75	0.000176295	0.00121942	19	6.01666	1636.96	1235.45	0.754722	1129	1458	1073	1205	2492	2849	3248	3106	615	669	638	653	1352	847	1738	724	1487.25
1799	unknown2076	0.000987235	0.00460639	18	9	2635.74	0.0221599	0.159709	20	6	7317	0.00025662	0.00156978	19	7.6	4138.15	2976.03	0.719169	2112	2388	1358	1073	8115	6312	7592	7249	2611	4953	3752	2564	2842	1488	1120	1321	3553.12
1800	unknown2077	0.000171384	0.00137171	18	9	10995.3	0.751891	0.971036	20	5.99999	78734.8	0.00128305	0.0048436	19	7.6	29911.2	38781.3	1.29655	392	500	384	282	241373	15210	32700	25656	1243	15487	7664	12894	1452	239	398	729	22287.7
1802	unknown2079	0.000572095	0.00320048	18	9	1881.26	0.0374818	0.167316	20	6.00003	5797.25	0.000251959	0.00155855	19	7.60001	3070.81	2158.8	0.703006	940	1011	1223	1702	4879	4809	7032	6469	1442	2019	2074	1923	1798	2634	1331	1057	2646.44
1804	unknown2080	7.77e-06	0.000124608	18	9	5949.95	0.0168423	0.159709	20	5.99999	30980.8	2.2e-06	4.3e-05	19	7.6	12208.7	14829.7	1.21468	650	791	558	171	31660	28854	34295	29114	3707	7453	3448	1723	3572	905	759	1037	9293.56
1805	unknown2081	2.89e-06	5.71e-05	18	9	46231.3	0.0159218	0.159709	20	5.99999	226956	8.22e-07	1.95e-05	19	7.59999	89184	109580	1.22869	5644	4064	2831	1037	242137	227612	231912	206162	30404	52641	28162	11948	20837	4917	5830	6152	67643.1
1808	unknown2084	0.000320124	0.00217263	18	9	4610.34	0.0164272	0.159709	20	6	16199	6.92e-05	0.000616456	19	7.6	8275.7	7154.03	0.864462	2795	2894	2286	1419	16473	15254	17102	15967	6463	8104	6113	4000	4413	1831	2503	2293	6869.38
1812	unknown2088	8.77e-05	0.00082364	18	9	10046.6	0.0172058	0.159709	20	5.99999	42620.5	2.17e-05	0.000259926	19	7.59999	17155.3	20456.5	1.19242	1589	1665	795	295	41672	49271	41915	37624	10773	8882	4959	2043	4172	1153	2080	1257	13134.1
1813	unknown2089	4.22e-05	0.000465917	18	9	5258.05	0.0170868	0.159709	20	5.99998	24516.5	1.09e-05	0.000150982	19	7.59999	10272	11687.4	1.13779	1335	1400	658	234	23652	27403	24502	22509	7024	6307	3673	1969	3317	997	1595	1018	7974.56
1815	unknown2090	4.22e-05	0.000465917	18	9	97660.3	0.0182119	0.159709	20	5.99999	305832	1.16e-05	0.000157231	19	7.59999	120539	147683	1.22519	7524	7868	3968	1422	342490	351763	271197	257880	63061	59336	33456	14299	25363	6415	10773	7304	91507.4
1818	unknown2093	0.000987235	0.00460639	24	21	912.345	0.03049	0.161456	23.9024	17.9999	3854.74	0.000343479	0.00192651	23.9512	19.497	2735.6	967.139	0.353538	2355	2566	3184	3280	1545	1345	1885	1669	1573	2572	3192	3217	3658	3995	3933	3833	2737.62
1820	unknown2095	0.000987235	0.00460639	24	9	2016.31	0.154224	0.311179	22.7907	5.99999	9543.25	0.00149057	0.00542701	23.3953	7.46621	7490.3	2229.15	0.297605	7538	7925	4377	4031	10483	9585	8566	9539	8631	8972	7585	7627	7514	3608	6780	6165	7432.88
1822	unknown2097	0.0065055	0.0176718	24	9	382.545	0.921295	1	20	6	12513	0.0366626	0.0679577	22	7.425	3948.62	5778.9	1.46352	338	400	268	349	44271	783	2881	2117	176	789	478	1413	351	302	250	252	3463.62
1823	unknown2098	0.00164724	0.00666594	18	6	1109.98	0.0538868	0.181591	20	6.00001	2874.25	0.000916896	0.00381024	19	6.01667	1640.14	1156.44	0.705085	1230	1491	1051	1529	2228	2254	3922	3093	480	680	659	656	1851	674	1444	758	1500
1827	unknown2100	0.000572095	0.00320048	18	9	8297.9	0.020531	0.159709	20	5.99999	25319.5	0.000145083	0.00108125	19	7.59999	10580.1	11711.3	1.10691	1638	1872	1033	610	19757	25628	29878	26015	6642	5207	3693	1606	4207	1506	2052	1103	8277.94
1828	unknown2101	0.000320124	0.00217263	18	9	29414.6	0.0226991	0.159709	20	5.99999	73106.5	9.32e-05	0.000771997	19	7.6	29649.3	34279.6	1.15617	3718	4141	2140	1058	51233	78808	88648	73737	17608	13712	8051	3734	9884	3326	4334	2439	22910.7
1829	unknown2102	0.00421867	0.0128369	18	0	877.873	0.0854991	0.22256	20	17.9999	4178	0.00322008	0.00959596	19	18.05	3434.72	929.248	0.270545	4318	5520	3719	4088	1651	2661	2408	2215	4473	3584	3285	3552	4686	3618	4359	4049	3636.62
1832	unknown2105	0.0065055	0.0176718	18	9	4186.6	0.365169	0.573516	20	6	18931.8	0.0167302	0.0353893	19	7.6	7175.93	8756.03	1.22019	757	795	710	456	46100	6685	13259	9683	430	2177	1122	1665	1250	869	605	712	5454.69
1833	unknown2106	0.00421867	0.0128369	18	9	7668.22	0.54915	0.774787	20	6.00002	29726	0.0163734	0.0348694	19	7.60001	12428.4	14422.6	1.16046	790	691	1160	1329	78120	7168	16521	17095	648	6437	5113	12194	1519	2412	656	1638	9593.19
1834	unknown2107	0.000572095	0.00320048	18	9	40961.8	0.404572	0.617699	20	6	171852	0.00216898	0.0071747	19	7.6	63821.9	81636.6	1.27913	2826	3262	3182	2133	433831	61188	107069	85320	3033	18659	10469	15904	6986	4465	1821	4236	47774
1835	unknown2108	0.000572095	0.00320048	18	9	2596.5	0.0919037	0.231463	20	5.99998	7546	0.000570636	0.00272721	19	7.59999	3311.41	3470.51	1.04805	398	516	618	572	13396	4268	6616	5904	443	1994	1872	2334	829	1041	540	726	2629.19
1838	unknown2110	7.77e-06	0.000124608	24	21	1790.39	0.0191455	0.159709	22.9091	17.9999	6175.24	2.49e-06	4.66e-05	23.4545	19.4756	4369.7	1962.96	0.449221	5193	6573	4819	4411	2019	2623	2359	2175	4090	3401	4227	4076	7314	5778	6122	5487	4416.69
1839	unknown2111	0.000987235	0.00460639	18	0	1304.97	0.0386833	0.167576	20	17.9999	5324.5	0.000426689	0.0022343	19	18.05	4388.93	1228	0.279796	5504	5392	5930	6034	2284	3274	2975	2429	4617	4809	4786	5160	5977	5779	4510	5032	4655.75
1844	unknown2116	0.0210199	0.0421957	18	9	522.905	0.0286307	0.160845	20	6	3531.75	0.00506459	0.013323	19	7.6	2026.77	1112.87	0.549088	924	1529	896	1158	3609	3815	3556	3147	1119	1262	1204	1422	1952	1078	1134	1123	1808
1846	unknown2118	1.91e-05	0.00025515	18	9	3215.57	0.0172495	0.159709	20	5.99999	21060.5	5.24e-06	8.32e-05	19	7.6	9011.61	9276.14	1.02935	1531	2405	1384	1352	19885	20770	23144	20443	3693	3926	3293	2725	3536	2358	2012	2553	7188.12
1847	unknown2119	0.00421867	0.0128369	18	9	84258	0.0461719	0.171511	20	6	332554	0.00185895	0.00641373	19	7.6	128973	149801	1.16149	21507	22764	13255	6965	425430	418497	355066	131223	25853	32781	24432	16204	44222	13178	18102	22926	99525.3
1849	unknown2120	0.00980952	0.0239973	18	9	13237.7	0.01583	0.159709	20	6	100354	0.00151717	0.00549736	19	7.6	38111	45883.6	1.20395	5469	5912	2747	1620	98418	108285	104494	90219	7741	8662	5718	3810	9707	2774	5230	4654	29091.2
1850	unknown2121	8.77e-05	0.00082364	18	9	1862.17	0.0219148	0.159709	20	5.99999	8408.5	2.72e-05	0.000304507	19	7.6	4128.72	3330.58	0.806686	1522	1766	1197	1067	7354	9040	9457	7783	2497	1777	2412	1999	2438	1648	1830	1797	3474
1851	unknown2122	0.0210199	0.0421957	18	9	6256.13	0.0173233	0.159709	20	6	41078.2	0.00324734	0.00966391	19	7.6	16442.3	18178.5	1.10559	3634	4145	1850	1026	38768	45612	42762	37171	4847	4902	3436	2410	6525	2012	3610	3191	12868.8
1852	unknown2123	0.000572095	0.00320048	18	0	12211.7	0.0196484	0.159709	24.9858	17.9999	21857.7	0.00013934	0.00105295	21.4929	18.4883	16725.7	12094.1	0.723087	30088	39238	25285	31566	7777	10880	9387	9115	8365	8911	10020	10585	25642	19748	20243	21798	18040.5
1853	unknown2124	0.000572095	0.00320048	18	9	12922.2	0.806964	1	20	6	93418.2	0.00400752	0.0112972	19	7.6	33438.5	44300.7	1.32484	942	989	1065	683	300331	19347	33587	20408	960	4173	2534	5129	2082	1677	730	1043	24730
1854	unknown2125	0.0144977	0.0319142	18	9	21673.2	0.0194544	0.159709	20	6	84787	0.00258733	0.00816554	19	7.6	33017.4	37941.7	1.14914	6006	6665	3300	1853	75331	105688	78954	79175	8674	7158	6072	3291	10887	3405	6811	5672	25558.9
1855	unknown2126	0.000320124	0.00217263	18	9	8051.12	0.307389	0.504355	20	6	25008	0.00100631	0.00406466	19	7.6	8966	11852.5	1.32194	314	323	222	101	60101	12120	16098	11713	316	1315	881	1003	759	415	217	279	6636.06
1856	unknown2127	0.0065055	0.0176718	18	9	84547.3	0.04737	0.173457	20	6	180684	0.00279964	0.00864471	19	7.6	66548.8	84075.2	1.26336	5237	5173	5097	1668	300331	148841	148704	124859	6829	13459	8727	5129	12609	5161	3911	4608	50021.4
1860	unknown2130	0.0144977	0.0319142	18	9	87589.3	0.0169448	0.159709	20	6	518956	0.00228749	0.00747472	19	7.6	200321	234480	1.17052	35529	36432	17515	8433	564621	568170	457533	485499	49059	43662	34784	22525	58778	17545	36250	31307	154228
1861	unknown2131	0.00164724	0.00666594	18	0	5751.78	0.0112374	0.159709	24.0327	17.9999	15896	0.000220224	0.00143827	21.0163	18.3786	10904.3	6198.36	0.568432	16273	20161	14583	15609	6213	8155	6501	6279	6808	7455	8080	7682	17084	15483	15785	15232	11711.4
1862	unknown2132	0.000572095	0.00320048	18	9	1499.42	0.0329419	0.16536	20	6.00002	6331.5	0.000223874	0.00145552	19	7.60001	3615.83	2192.59	0.606387	1738	2115	1374	1343	5394	6864	6068	7000	3009	2285	2460	2082	2694	1797	2661	2073	3184.81
1863	unknown2133	0.00164724	0.00666594	18	9	2995.3	0.022357	0.159709	20	5.99999	15175.2	0.000412807	0.00219051	19	7.6	7309.44	6107.62	0.835581	2553	3071	1732	1547	13243	15963	14961	16534	4685	3649	3586	2792	4115	2347	4006	2957	6108.81
1864	unknown2134	7.77e-06	0.000124608	18	9	16579.5	0.018894	0.159709	20	5.99999	101179	2.46e-06	4.62e-05	19	7.6	46104.9	42594.9	0.923869	12369	14233	10105	8922	97035	111422	96194	100066	23216	20497	21631	16992	20227	13689	20271	16838	37731.7
1867	unknown2137	4.22e-05	0.000465917	24	0	4082.83	0.0176053	0.159709	24.7059	6.63e-05	11066.5	1.12e-05	0.000153297	24.3529	3.27e-05	6629.21	5087.5	0.767436	10719	13802	8590	11155	2896	4371	3648	3810	3277	3201	3303	3621	9650	7282	7859	7979	6572.69
1869	unknown2139	0.000572095	0.00320048	18	9	72655	0.0378687	0.167576	20	6	151603	0.000254338	0.00156409	19	7.6	61062.9	69828.4	1.14355	7285	10464	9348	4863	235393	113502	119066	138451	11415	27339	18529	21288	13715	4099	6413	16209	47336.2
1873	unknown2142	0.0419656	0.0724237	18	6	4186.96	0.0458925	0.171011	20	6	11437.2	0.0139673	0.0305602	19	6.01667	6097.48	5447.82	0.893454	3991	5037	1776	2837	13428	13690	8646	9985	3404	3334	2912	2841	5703	1510	4389	3514	5437.31
1877	unknown2146	0.0299489	0.0559443	18	9	121120	0.0223592	0.159709	20	6	347954	0.00556383	0.0143157	19	7.6	129148	159805	1.23738	17460	15900	7295	3030	428351	408826	297580	257061	23418	19088	13333	7392	31634	8661	14505	10213	97734.2
1878	unknown2147	0.0419656	0.0724237	18	9	18310.5	0.0186182	0.159709	20	6	67743.5	0.00637133	0.0160301	19	7.6	25313.4	31023	1.22556	3786	3621	1418	547	75001	78350	64846	52777	5411	4006	2747	1372	6642	1692	3154	2069	19214.9
1880	unknown2149	0.00164724	0.00666594	18	0	2260.62	0.0147918	0.159709	24.0327	17.9999	6303.23	0.000283186	0.00168489	21.0163	18.3786	4356.04	2504.24	0.574889	7073	8054	5554	6324	2267	3332	2764	2524	2899	2878	3139	2893	7383	5756	6503	5571	4682.12
1883	unknown2151	0.00421867	0.0128369	24	9	1909.9	0.0440617	0.168276	20	6	8694	0.00178268	0.00621676	22	7.425	5963.21	2277.55	0.381933	5158	5431	4540	3082	8928	9410	8712	7726	4902	6429	4987	6130	4824	2412	3812	5870	5772.06
1884	unknown2152	0.0144977	0.0319142	18	9	7864.09	0.0208466	0.159709	20	6	24978.8	0.00275158	0.00854382	19	7.6	9981.43	11308.2	1.13292	2941	2433	651	258	27417	30592	22120	19786	4457	4205	1823	547	4140	341	1419	1006	7758.5
1885	unknown2153	0.0144977	0.0319142	18	9	152118	0.0270274	0.160754	20	6	346989	0.00346566	0.0101531	19	7.6	129592	161677	1.24759	20673	16963	3665	808	402665	468617	264788	251887	35659	34027	13885	2983	32581	1367	8694	5692	97809.6
1886	unknown2154	0.0065055	0.0176718	18	9	6440.33	0.0172848	0.159709	20	6	45552	0.00113492	0.00443522	19	7.6	19675.2	19716.7	1.00211	5561	7155	3188	2015	42932	50101	43944	45231	9396	9001	5858	5408	8285	1430	5969	7315	15799.3
1887	unknown2155	0.0065055	0.0176718	18	9	4686.35	0.0174517	0.159709	20	6	31127	0.00114479	0.00445395	19	7.6	14225.9	12859.7	0.903966	5331	6504	3288	2270	31746	33902	29479	29381	7653	6898	5390	4851	6805	2340	4933	6396	11697.9
1888	unknown2156	0.00164724	0.00666594	18	9	76215.9	0.0188023	0.159709	20	6	317415	0.000352535	0.00196205	19	7.6	130913	140979	1.07689	27954	36467	18588	10555	350362	363004	259360	296935	46745	48033	35138	34292	40899	8133	30203	44532	103200
1889	unknown2157	0.0299489	0.0559443	18	9	31630.7	0.0311756	0.161527	20	6	73044.8	0.00744736	0.0181776	19	7.6	27412.9	33824.6	1.23389	4806	3807	998	284	98614	89970	50052	53543	7109	7126	3348	706	7588	399	2366	1504	20763.8
1890	unknown2158	0.0210199	0.0421957	18	9	19983.2	0.0212324	0.159709	20	6	59908.8	0.00388931	0.0110503	19	7.6	22710	27683.5	1.219	4499	3875	628	172	68728	73935	50654	46318	7122	6825	2541	557	6861	293	1996	1284	17268
1891	unknown2159	0.00421867	0.0128369	18	6	3454.57	0.116962	0.263226	20	6	13818	0.00425043	0.0118204	19	6.01667	10107.7	3588.57	0.355032	9475	9340	8465	7654	11702	13528	13613	16429	5789	7121	8594	5750	12678	9421	7818	7389	9672.88
1895	unknown2162	0.0499351	0.0858693	24	3	1394.94	0.108103	0.252882	20.464	8.1e-05	6308	0.0335855	0.0632818	22.232	1.38955	5143.88	1665.54	0.32379	5930	6195	5864	7243	4083	6152	6519	7252	2124	3258	4083	4178	6393	5143	4142	4947	5219.12
1897	unknown2164	0.0210199	0.0421957	18	6	4856.23	0.0498323	0.177445	20	6.00001	14223	0.00823454	0.0196666	19	6.01667	9510.16	4702.99	0.494522	8396	8856	6531	5981	12953	14896	13874	15169	5486	6120	8830	5452	10588	6382	7831	5699	8940.25
1898	unknown2165	0.000171384	0.00137171	18	0	989.242	0.0682747	0.199077	20	17.9999	4192.5	0.000144578	0.00108121	19	18.05	3590.8	858.977	0.239216	4241	4737	4519	4782	1570	2482	3067	2665	3985	3351	4009	4261	4056	4451	3845	4418	3777.44
1899	unknown2166	0.000572095	0.00320048	18	9	14694	0.0422177	0.168276	20	6	29324	0.000280921	0.00168242	19	7.6	11349.5	13858	1.22101	1321	1347	416	147	47168	24664	22136	23328	3406	5560	2111	1392	3150	366	822	672	8625.38
1902	unknown2169	0.0299489	0.0559443	18	9	115299	0.0823332	0.218713	20	6.00002	352450	0.0172735	0.0362083	19	7.60001	166911	150522	0.901813	71973	56169	19021	3158	473034	419100	305884	211781	145287	132569	70474	12983	191727	17716	46118	20149	137321
1905	unknown2171	0.0299489	0.0559443	18	6	21603.9	0.0316501	0.163211	20	6	47030.5	0.00754639	0.0183572	19	6.01667	25683.6	21874.6	0.851698	16558	17699	13613	10233	47437	42297	45929	52459	11069	15222	17039	9848	26046	15974	14939	12163	23032.8
1906	unknown2172	0.00421867	0.0128369	18	6	3579.37	0.0399715	0.167576	20	6.00001	9870.5	0.00163362	0.00582668	19	6.01667	6104.88	3770.75	0.617663	4758	4950	4127	3726	8462	9239	9907	11874	3288	3946	4192	2889	6424	4564	3948	4073	5647.94
1908	unknown2174	0.000572095	0.00320048	18	9	200437	0.0300425	0.161299	20	6	434254	0.000205753	0.00136017	19	7.6	160324	206789	1.28982	9412	10523	2817	977	504502	607487	294262	330765	38496	45783	19542	10730	22599	1574	6836	8483	119674
1909	unknown2175	0.00267199	0.00936821	18	9	11931	0.0196579	0.159709	20	6	34545.8	0.000570126	0.00272721	19	7.6	13405.1	16380.3	1.22195	1619	1431	453	191	33969	43120	26733	34361	6466	5312	2403	1198	2988	259	1322	1136	10185.1
1911	unknown2177	0.0419656	0.0724237	18	6	819.89	0.0579824	0.186902	20	6.00001	2514.75	0.0170779	0.0358968	19	6.01667	1663.92	838.504	0.503932	1145	1169	1639	1331	2344	2373	2743	2599	671	1114	1229	1290	1502	1957	932	959	1562.31
1919	unknown2184	0.00164724	0.00666594	18	9	29073.4	0.0198063	0.159709	20	6	83265.2	0.000369663	0.00201846	19	7.6	31287.7	39632.4	1.26671	2420	2664	689	214	91711	101408	61058	78884	11003	10363	3952	2172	4955	367	2016	2073	23496.8
1921	unknown2186	0.0210199	0.0421957	24	6	6304.56	0.039374	0.167576	20.9501	6	25325.5	0.00670132	0.0166984	22.4751	6.02775	20234	2063.36	0.101975	20604	24864	23518	24876	23151	25068	24283	28800	10811	14257	15780	16471	22516	13603	14630	18930	20135.1
1922	unknown2187	0.00421867	0.0128369	18	6	9649.18	0.0365377	0.166866	20	6	21493.5	0.00150713	0.00547014	19	6.01667	12121.9	9490.59	0.782931	8631	9403	6973	5055	19829	21140	20562	24443	5754	6943	7136	4330	13067	8234	7490	6559	10971.8
1925	unknown219	0.00421867	0.0128369	18	9	6907.73	0.0387889	0.167576	20	5.99999	21218.5	0.00159021	0.00570472	19	7.6	10642.1	8111.27	0.762185	3850	5278	3612	3571	15622	21527	18611	29114	4286	4740	6195	7357	6503	4447	4973	5076	9047.62
1928	unknown2192	4.22e-05	0.000465917	24	3	6122.13	0.0238077	0.159709	23.6461	6.15e-05	24561.2	1.49e-05	0.000191676	23.8231	1.48897	17414.8	8591.77	0.493359	20177	24588	24696	28784	16734	18399	18953	21826	8459	9407	10468	11847	20931	15963	13248	14607	17442.9
1930	unknown2194	0.0299489	0.0559443	24	0	417.37	0.441259	0.656806	25.1282	6.63e-05	4258.75	0.0703894	0.116375	24.5641	3.24e-05	3693.73	539.563	0.146075	3863	4828	3838	4506	3276	4585	3307	3273	3534	2845	3213	3241	4496	3250	3592	3303	3684.38
1934	unknown2198	0.000171384	0.00137171	24	3	4209.58	0.0453214	0.170201	22.9091	6.63e-05	16090	9.92e-05	0.000805518	23.4545	1.46594	12262.8	4609.42	0.375886	15926	17656	15380	15398	14305	15118	10797	14891	6334	8356	7933	9437	15325	8091	9917	12150	12313.4
1935	unknown2199	8.88e-07	2.07e-05	24	0	4885.22	0.0128889	0.159709	24.4321	6.63e-05	11562	2.21e-07	7.53e-06	24.2161	3.29e-05	7045.19	5438.92	0.772005	12304	11348	12011	10585	3835	3925	4186	5488	3043	3144	3484	3520	10774	10064	7644	6767	7007.62
1940	unknown2202	0.0065055	0.0176718	18	9	31593.9	0.0634389	0.193348	20	5.99999	107212	0.0036288	0.0105313	19	7.59999	56308.9	38722.5	0.687681	25301	29836	17176	8851	116119	112197	113794	86740	29848	37107	39895	16091	66471	33099	31650	14975	48696.9
1941	unknown2203	0.000171384	0.00137171	18	9	64294.4	0.07602	0.208465	20	6	260888	0.000159579	0.0011478	19	7.6	98180.5	122138	1.24401	8687	7553	4002	1904	431845	299767	218062	93879	27923	22461	15174	8695	23862	5302	9052	8566	74170.9
1942	unknown2204	0.000320124	0.00217263	18	9	6000.15	0.0725747	0.204093	20	5.99999	27769.2	0.000271127	0.00164193	19	7.6	11870.2	12313	1.0373	2489	2312	1473	743	36194	35625	29770	9488	4353	6396	4732	2557	7699	1853	2910	2602	9449.75
1943	unknown2205	4.22e-05	0.000465917	18	9	34912	0.0531414	0.181183	20	6	127706	3.14e-05	0.000339084	19	7.6	48273.7	59736.3	1.23745	3995	4264	2049	991	190775	148053	121101	50893	13703	12543	7554	4389	12295	2992	4521	4376	36530.9
1944	unknown2206	4.22e-05	0.000465917	18	9	16937	0.0439326	0.168276	20	6	54934.5	2.63e-05	0.000296687	19	7.6	21536.8	25473	1.18277	2516	2669	1279	758	75777	65636	53354	24971	8274	7338	4511	2807	7000	2011	2743	2826	16529.4
1945	unknown2207	0.00267199	0.00936821	24	0	562.15	0.0966929	0.237887	24.5682	6.03e-05	4201	0.00239274	0.00772599	24.2841	2.98e-05	3426.44	777.348	0.226867	3811	4019	5021	3953	2894	3270	3447	3754	2133	2612	2981	3097	3946	3703	2913	3157	3419.44
1946	unknown2208	0.0299489	0.0559443	24	0	464.569	0.221766	0.400939	26.0177	6.63e-05	3922.74	0.0399456	0.0728578	25.0088	3.19e-05	3175.17	671.137	0.21137	3274	3642	4767	4008	2407	2976	3014	3521	2088	2620	2778	3010	3543	3500	2503	2836	3155.44
1949	unknown2210	0.00267199	0.00936821	24	0	795.495	0.122959	0.271363	24.5682	6.63e-05	3655.99	0.00296377	0.00907575	24.2841	3.28e-05	2646.1	1100.26	0.415802	4591	4095	3158	2780	2396	2925	1946	2267	1276	2176	1715	1706	2882	1862	2515	3889	2636.19
1952	unknown2213	0.0210199	0.0421957	18	9	1631.65	0.0169261	0.159709	20	6	10093	0.00318113	0.00951263	19	7.6	4108.99	4372.24	1.06407	997	965	769	632	10409	10756	10601	8606	1114	1208	910	787	1648	882	938	770	3249.5
1953	unknown2214	0.0144977	0.0319142	18	6	1094.95	0.106564	0.251045	20	5.99998	11539.8	0.0115449	0.0260226	19	6.01666	10719.7	639.449	0.0596516	11192	11733	10381	10108	10921	11841	12160	11237	9342	9476	9344	9283	11669	10332	11185	10072	10642.2
1955	unknown2216	0.000171384	0.00137171	24	0	2361.03	0.0413583	0.168276	24.8451	6.63e-05	10515.2	9.11e-05	0.000763262	24.4225	3.26e-05	7615.63	3049.94	0.400485	8986	10594	10802	11679	5701	6046	6961	8853	4125	4990	5273	5775	10084	8241	6350	6746	7575.38
1958	unknown2219	0.0144977	0.0319142	24	9	760.317	0.0331711	0.165473	20	5.99999	4306.25	0.00415494	0.0116192	22	7.425	2431.45	1336.93	0.54985	1389	1864	1107	1962	3144	5060	4621	4400	1328	1640	2263	2102	1837	1093	1683	1615	2319.25
1961	unknown2221	0.0144977	0.0319142	18	9	1960.1	0.0299953	0.161299	20	6	7390.5	0.00380092	0.0108633	19	7.6	4043.62	2568.93	0.635304	1947	2283	1364	2802	5490	8426	7087	8559	1459	2464	2982	3075	2629	1366	2112	2573	3538.62
1962	unknown2222	0.0419656	0.0724237	18	6	6316.05	0.294804	0.490397	20	6	16687.2	0.0667122	0.111316	19	6.01667	8821.83	8470.99	0.960231	5457	4096	2120	1114	19216	19799	17577	10157	5868	4177	3689	1453	16142	6695	5283	1882	7795.31
1994	unknown2251	0.0210199	0.0421957	24	12	2564.85	0.119362	0.266961	21.995	12	11460.2	0.0175324	0.036669	22.9975	12.0229	8470.52	3222.92	0.380487	6434	8103	3907	5391	6703	11712	6057	9406	11198	10915	12181	11547	10060	5996	6845	7441	8368.5
1998	unknown2255	0.0065055	0.0176718	24	15	2550.18	0.0290899	0.160845	20	12	11401.5	0.00181153	0.00628521	22	13.475	7222.46	5250.39	0.726954	5233	6791	3441	4127	5041	6966	4246	6069	9799	11198	11947	12662	8683	5070	5569	6458	7081.25
2002	unknown2259	0.0299489	0.0559443	24	15	69748.3	0.0603532	0.188828	20	12	288833	0.0132234	0.0292428	22	13.475	180359	135252	0.749905	124462	170736	62165	100883	115930	236321	99656	142328	297739	251834	293899	311859	225230	100257	153421	140829	176722
2004	unknown2260	0.0419656	0.0724237	24	15	8383.81	0.140971	0.294411	20	12	38070.5	0.0362653	0.0673264	22	13.475	27069.6	13573.6	0.501432	21924	30061	12632	18959	16643	30488	16054	21771	35331	33002	40199	43750	36441	17820	26923	25275	26704.6
2006	unknown2262	0.000572095	0.00320048	24	12	1348.81	0.035721	0.166866	20.3695	12	4508	0.000241106	0.00152721	22.1848	12.0809	2927.04	1844.55	0.630177	2047	2274	1155	1485	2434	4073	2316	3127	3893	4269	4787	5083	2816	1758	1766	1944	2826.69
2007	unknown2263	0.00980952	0.0239973	24	15	700.212	0.213283	0.390163	20.9501	12	3475.25	0.0150001	0.0324753	22.4751	13.4602	2416.73	1288.91	0.533327	1661	2630	849	1445	1820	2736	1817	2008	2769	2821	3942	4369	3594	1558	2049	2133	2387.56
2008	unknown2264	0.00980952	0.0239973	24	15	957.776	0.0557305	0.183256	20	12	4568.25	0.00465322	0.0126007	22	13.475	2971.05	1984.11	0.667813	2248	2747	1323	1962	1828	2593	2043	2458	3397	4205	4896	5775	3813	2209	2482	2704	2917.69
2009	unknown2265	0.0419656	0.0724237	24	12	1269.96	0.489239	0.711113	24.5682	12	9005.5	0.100312	0.157316	24.2841	12.0016	7517.35	1779.99	0.236784	6662	6711	4883	5329	5817	10849	5993	9392	7085	11383	9395	8159	7922	7167	6722	7075	7534
2010	unknown2266	0.0419656	0.0724237	18	0	525.734	0.622959	0.847178	20	17.9999	3179.25	0.121412	0.185176	19	18.05	2822.57	491.581	0.174161	3625	4350	2124	3470	2024	2672	2341	2220	3144	2413	2622	3148	3765	2541	3239	3172	2929.38
2011	unknown2267	0.0144977	0.0319142	24	15	18399.4	0.0702601	0.201033	20.1831	12	68972.2	0.00803615	0.0192672	22.0915	13.471	44678.1	29579.1	0.66205	30856	43837	17209	26401	26060	50060	24021	32883	65400	58977	69012	82500	62848	27632	43559	41186	43902.6
2012	unknown2268	0.0065055	0.0176718	24	12	26461.9	0.077691	0.211175	21.0501	12	83136	0.00434161	0.0120026	22.5251	12.0517	52119.4	35909.5	0.688986	31119	43010	15565	21841	41295	90059	33340	51764	88836	68328	81249	94131	54058	25086	37923	30264	50491.8
2015	unknown2270	0.000987235	0.00460639	24	12	1903.89	0.074746	0.207304	21.7778	12	6430.75	0.000775867	0.00339771	22.8889	12.0283	4091.25	2683.32	0.655867	2435	3178	1182	2009	3566	6403	2963	4245	5733	4914	6803	8273	4498	2168	2816	2776	3997.62
2017	unknown2272	0.0299489	0.0559443	24	0	2738.09	0.285808	0.480415	24.7059	6.63e-05	14439.7	0.0493095	0.0866519	24.3529	3.27e-05	11319.9	3410.51	0.301284	14593	18286	9587	15293	7363	14385	8461	10713	9846	8059	7616	8904	11372	10061	14119	11854	11282
2022	unknown2277	0.0210199	0.0421957	24	15	1581.8	0.0864359	0.224259	20.2759	12	5530	0.0132825	0.0293584	22.1379	13.4691	3631.65	2302.93	0.634126	2689	3821	1221	2186	2241	3921	1673	2552	5202	4968	5459	6491	5280	2195	3386	3869	3572.12
2023	unknown2278	0.0144977	0.0319142	24	15	14256	0.0756044	0.207727	20.0911	12	49408.5	0.00856705	0.0202929	22.0456	13.4729	31529.2	21856.2	0.693204	23396	33639	11375	16576	16641	34849	13654	20222	51557	42289	49248	54540	46811	19389	32006	28985	30948.6
2029	unknown2283	0.0419656	0.0724237	18	0	1009.22	0.362281	0.570221	20	17.9999	6083.24	0.0788482	0.128351	19	18.05	5164.21	1016.76	0.196886	6206	6772	4515	7218	3048	5572	3315	4733	5873	4006	5228	5343	6627	5435	5569	6702	5385.12
2038	unknown2291	0.0299489	0.0559443	24	12	775.873	0.152186	0.308794	20	12	3993.5	0.0291286	0.0561312	22	12.1	2778.54	1262.39	0.454336	2138	3031	1180	1748	1832	3711	2032	2385	3989	3251	4035	4699	3196	1705	1983	2350	2704.06
2041	unknown2294	0.0299489	0.0559443	24	12	4322.9	0.111868	0.257379	20	12	19477	0.0224428	0.0448855	22	12.1	13109.5	6483.65	0.494577	9124	13728	5365	6854	8236	17867	7606	12426	18550	17736	19749	21873	15667	7733	9871	11247	12727
2044	unknown2297	0.0210199	0.0421957	18	6	294.864	0.496303	0.717048	20	6	1313.25	0.058033	0.0991161	19	6.01667	1062.7	217.782	0.204932	882	1109	1029	1070	1076	1307	1458	1412	500	545	667	814	1395	1755	794	768	1036.31
2045	unknown2298	0.0299489	0.0559443	18	15	860.372	0.162548	0.321972	20	12	3334.5	0.0307911	0.0587079	19	13.6167	2643.83	982.629	0.371669	2768	3542	1826	2590	1328	2175	1489	1970	3425	3179	3166	3568	3535	2003	2737	2848	2634.31
2049	unknown2300	0.00421867	0.0128369	24	21	23325	0.0437772	0.168276	20	17.9999	86299.4	0.00177237	0.00619398	22	19.525	68386.6	22757.6	0.332779	76393	88224	86231	96966	35520	33092	45578	34854	56100	68494	72983	88175	86555	91084	101263	66296	70488
2050	unknown2301	0.0177588	0.0389345	24	21	432.396	0.0539742	0.181591	20	17.9999	1591.75	0.00762032	0.0184955	22	19.525	1264.74	402.857	0.31853	1317	1616	1593	1804	643	619	885	654	985	1303	1385	1660	1505	1660	1910	1292	1301.94
2055	unknown2306	7.77e-06	0.000124608	24	0	2243.12	0.0186838	0.159709	24.1644	6.63e-05	6033.73	2.43e-06	4.62e-05	24.0822	3.3e-05	3889.61	2856.26	0.73433	7166	6934	5237	4798	2807	2903	2319	2469	1704	1890	1873	1987	6302	5207	4375	4141	3882
2056	unknown2307	0.00267199	0.00936821	18	6	1396.89	0.0933965	0.232953	20	6	5127.5	0.00231982	0.00754682	19	6.01667	3814.95	1125.52	0.295028	3134	3963	3690	4160	4775	4385	5535	5815	1139	1839	2410	2799	3406	3090	3433	5284	3678.56
2059	unknown231	0.0419656	0.0724237	18	9	1043.51	0.113658	0.259021	20	6.00002	3767	0.0302661	0.0579621	19	7.60001	2226.71	1252.8	0.562622	541	749	1264	2095	4768	3741	2763	3796	645	1413	1548	2788	1244	1619	587	2126	1980.44
2063	unknown2313	0.00980952	0.0239973	24	15	24783	0.171046	0.332867	21.5648	12	112123	0.0123999	0.0276761	22.7824	13.4583	82791.5	32426.6	0.391665	73555	72948	59171	38929	62555	62965	61827	59111	110636	139362	110667	87826	146753	82678	80712	65115	82175.6
2073	unknown2322	0.00421867	0.0128369	18	6	8651.27	0.0462505	0.171511	20	5.99999	48553	0.00186178	0.00641839	19	6.01666	37995.3	9952.98	0.261953	36515	34985	36271	32900	46519	42240	54214	51239	25193	29824	31515	32392	36763	38993	31233	27832	36789.2
2074	unknown2323	0.0419656	0.0724237	24	6	216.375	0.0153603	0.159709	20	6	10374.8	0.00538043	0.0139254	22	6.05	3372.51	6590.64	1.95423	525	556	303	734	8705	10717	10642	11435	420	552	459	488	610	491	346	436	2963.69
2081	unknown233	0.0299489	0.0559443	18	9	112738	0.0626161	0.192017	20	5.99999	629657	0.0136502	0.0300046	19	7.6	444339	145821	0.328174	227645	307485	315469	411051	675188	679680	532291	631468	287247	340058	367120	445948	361921	351232	314025	402954	415674
2084	unknown2332	0.000987235	0.00460639	24	21	4599.2	0.0292853	0.160845	24.1644	17.9999	9386.46	0.000331073	0.00187883	24.0822	19.5053	5072.93	5086.56	1.00269	9741	8552	7661	4411	1925	1381	1196	1216	1829	1727	1965	1732	14104	8339	7864	7239	5055.12
2085	unknown2333	0.0419656	0.0724237	18	9	2844.51	0.38576	0.596338	20	6.00002	10487.5	0.0829417	0.134054	19	7.60001	7035.82	2788.03	0.396263	5602	5733	2942	1661	12784	11379	9804	7983	5466	6954	5749	3623	10387	4118	5226	4393	6487.75
2090	unknown2338	0.000987235	0.00460639	18	9	4756.71	0.0186852	0.159709	20	6.00002	15439.5	0.000219527	0.00143588	19	7.60001	7462.18	6735.17	0.902575	2595	3235	1643	1251	17893	14767	13239	15859	4848	7042	4373	2480	3447	1345	2239	1955	6138.19
2092	unknown234	0.0419656	0.0724237	18	9	3868.93	0.169136	0.330486	20	6.00001	23917.8	0.0422179	0.0763909	19	7.60001	18509.5	4448.4	0.24033	10110	14062	13458	19101	22844	27249	20501	25077	13655	16125	16467	18792	16658	16517	13470	18075	17635.1
2095	unknown2342	0.00164724	0.00666594	18	0	687.661	0.127276	0.276882	20	17.9999	7377.25	0.00198544	0.00669546	19	18.05	6918.8	647.845	0.0936355	7571	7967	7311	7871	6104	6791	5718	6365	6938	6978	7342	6488	7915	7133	7583	6878	7059.56
2096	unknown2343	0.00421867	0.0128369	18	6	352762	0.018594	0.159709	20	6	712437	0.000819967	0.00352723	19	6.01667	285577	427562	1.49719	107171	86468	78074	121149	705955	723515	880895	539383	45704	56109	46144	34594	62838	61145	137736	53364	233765
2097	unknown2344	0.0065055	0.0176718	18	6	25650.3	0.0210601	0.159709	20	6	52181.8	0.00135574	0.00505631	19	6.01667	20231	32157.5	1.58951	6225	5030	4745	7063	48572	52428	69040	38687	2509	3712	3026	2315	3720	3140	7948	3187	16334.2
2099	unknown2346	0.00267199	0.00936821	18	6	381694	0.018891	0.159709	20	6	806026	0.000549891	0.00266535	19	6.01667	331395	471756	1.42355	155608	109519	110507	159423	842472	831647	969523	580463	45545	65511	58815	35788	83820	90050	171211	77740	274228
2100	unknown2347	0.00421867	0.0128369	18	6	26660.8	0.0215512	0.159709	20	6	62029.8	0.000936954	0.00387489	19	6.01667	24113.3	38075.8	1.57903	8210	6052	6475	8010	64892	66442	76674	40111	2393	4270	3511	2421	4906	4789	8603	4230	19499.3
2101	unknown2348	0.0144977	0.0319142	18	6	10754	0.0264729	0.159895	20	6	27410	0.00340251	0.0100224	19	6.01667	9909.88	17727.3	1.78885	1871	1377	1339	1986	33607	25888	34353	15792	632	1034	832	535	1119	996	1838	988	7761.69
2102	unknown2349	0.000987235	0.00460639	18	9	3238.9	0.0252749	0.159709	20	6	9776	0.00028941	0.00170033	19	7.6	4705	3789.85	0.805494	1757	1961	1525	1628	11696	9350	10770	7288	1936	2102	2214	2439	2454	1890	2305	2045	3960
2104	unknown2350	0.000171384	0.00137171	18	9	151396	0.0353869	0.166866	20	6.00002	364967	7.89e-05	0.000676687	19	7.60001	149420	181475	1.21453	9197	11394	3516	1237	527545	356403	223120	352801	74800	161603	42716	14632	19496	2795	8500	10184	113746
2105	unknown2351	7.77e-06	0.000124608	18	9	57910.5	0.033365	0.165867	20	5.99999	123964	4.19e-06	7.26e-05	19	7.6	47734.7	60008.9	1.25713	2568	2909	1034	868	185347	127739	84892	97878	17262	25998	9617	5916	5299	1992	2776	2917	35938.2
2109	unknown2355	0.00267199	0.00936821	18	6	3973.76	0.0493538	0.176467	20	6	19037	0.00130998	0.00491102	19	6.01667	15023.4	3764.23	0.250558	14397	15262	13402	12768	20085	19746	18012	18305	9444	12192	11974	12429	16476	14357	11256	12971	14567.2
2111	unknown2357	0.00267199	0.00936821	18	6	11671.5	0.0188071	0.159709	20	6	25625.2	0.000547673	0.00266153	19	6.01667	10512.1	15060.8	1.43271	4710	3558	3422	4753	28359	26658	29531	17953	1567	2353	1861	1327	2743	2592	4944	2661	8687
2112	unknown2358	0.0299489	0.0559443	24	3	273.827	0.24896	0.435202	22.5575	6.63e-05	4378.25	0.0439813	0.0789222	23.2788	1.45496	4077.8	373.858	0.0916811	4351	4760	4061	4341	4175	4329	4019	4209	4132	3705	3456	3655	4452	4125	3891	3674	4083.44
2113	unknown2359	0.000987235	0.00460639	18	6	4042.88	0.0278203	0.160845	20	6	7763.75	0.00031592	0.00180989	19	6.01667	3225.14	4553.22	1.41179	1272	841	1181	1486	7163	6470	11016	6406	505	707	670	489	980	1240	1676	672	2673.38
2115	unknown2360	0.0299489	0.0559443	18	6	3404.9	0.0152404	0.159709	20	6	5996.25	0.00396736	0.0112059	19	6.01667	2593.42	3447.69	1.3294	1008	942	815	1154	5818	5943	6679	5545	617	969	854	719	932	934	1189	692	2175.62
2116	unknown2361	0.0144977	0.0319142	18	6	47412.9	0.0182893	0.159709	20	6	91996.5	0.00244875	0.00784252	19	6.01667	34312.5	58585.7	1.70741	7604	6374	5026	7179	98463	89057	110439	70027	3203	6702	4370	2747	4704	5333	9463	4719	27213.1
2117	unknown2362	0.00980952	0.0239973	18	6	26378.6	0.0183088	0.159709	20	6	52652.5	0.00172861	0.00611012	19	6.01667	18829.1	34451.1	1.82967	2737	1996	1883	2434	60610	52493	59019	38488	1204	2408	1578	1162	1664	2065	3107	1621	14654.3
2120	unknown2365	0.000987235	0.00460639	18	6	4510.28	0.0146823	0.159709	20	6	6861.25	0.000175993	0.00121928	19	6.01667	2549.18	4387.03	1.72096	530	451	428	375	6973	6668	6801	7003	284	348	317	234	435	645	510	279	2017.56
2122	unknown2367	0.00267199	0.00936821	18	6	1.33467e+06	0.0192536	0.159709	20	6	2.57064e+06	0.00055947	0.00269467	19	6.01667	962761	1.62992e+06	1.69297	190927	135614	144058	322072	1989595	2704075	3216741	2372159	123719	106599	135373	97583	165214	147162	324080	68979	765247
2123	unknown2368	0.00421867	0.0128369	18	6	14354.3	0.0209581	0.159709	20	6	29380.8	0.000913638	0.00380577	19	6.01667	10431.8	19305.4	1.85063	1109	878	843	1710	21030	31549	37677	27267	813	726	849	734	934	886	2060	413	8092.38
2124	unknown2369	0.00267199	0.00936821	18	6	3949.54	0.0362747	0.166866	20	6	8067.5	0.000992671	0.00402459	19	6.01667	2708.53	5469.92	2.01952	42	30	34	94	5597	8291	12578	5804	26	23	15	8	39	27	102	21	2045.69
2125	unknown237	0.0419656	0.0724237	18	9	531.744	0.270128	0.460675	20	6	3334	0.062119	0.1047	19	7.6	2696.75	550.653	0.204191	1521	2181	2079	2664	2865	3652	3087	3732	2239	2651	2491	2462	2609	2722	1919	2542	2588.5
2126	unknown2370	0.0210199	0.0421957	18	6	70110	0.0163485	0.159709	20	6	122640	0.0030845	0.00932413	19	6.01667	43137.1	80945.7	1.87647	3860	2741	3018	7636	101531	125067	144536	119425	2327	2688	3086	2434	2976	3216	7301	1408	33328.1
2127	unknown2371	0.0299489	0.0559443	18	6	157416	0.018902	0.159709	20	6	309248	0.00479864	0.0129057	19	6.01667	110583	202314	1.82952	12238	9042	9660	22719	231236	321984	383221	300551	8879	10235	9977	8352	10396	9972	24053	4555	86066.9
2129	unknown2373	0.0419656	0.0724237	24	9	573.994	0.0209695	0.159709	20	6	20806.2	0.00707129	0.0174069	22	7.425	6707.25	9302.16	1.38688	1051	888	747	915	20140	25542	23253	14290	811	1532	845	1025	892	781	1466	647	5926.56
2131	unknown2375	0.00421867	0.0128369	18	6	94024.7	0.0234395	0.159709	20	6	200073	0.00101075	0.00406634	19	6.01667	79732.3	121862	1.5284	19508	15601	17921	37465	196688	261942	196511	145152	10120	15268	18093	13595	26339	18931	33727	12579	64965
2133	unknown2377	0.0144977	0.0319142	18	6	20090	0.0253218	0.159709	20	6	41407.5	0.00327088	0.00972059	19	6.01667	14878	26982.5	1.81359	1970	1448	1364	3176	29359	54738	48386	33147	1413	1075	1258	870	1485	1343	3947	753	11608.2
2134	unknown2378	0.0065055	0.0176718	18	6	76851.9	0.0166448	0.159709	20	6	132154	0.00109699	0.00431824	19	6.01667	46799.8	86809.3	1.85491	4701	3590	3495	9638	111161	127636	158244	131577	2777	2498	3172	2454	4335	3445	10003	1758	36280.2
2135	unknown2379	0.0210199	0.0421957	24	9	321.734	0.341085	0.546165	20.0911	6	6192	0.0425722	0.0769035	22.0456	7.42538	5845.14	317.801	0.05437	5476	5814	5737	5578	6260	5908	6386	6214	5291	6022	5883	6190	6013	5421	5236	5676	5819.06
2137	unknown2380	0.00421867	0.0128369	18	6	152551	0.0230549	0.159709	20	6	346027	0.000995769	0.00403124	19	6.01667	124886	224659	1.79892	16111	12030	12123	32843	225344	423178	412658	322928	10052	9897	10738	9312	14679	12767	31860	6068	97661.8
2138	unknown2381	0.00421867	0.0128369	18	6	1.43609e+06	0.0200595	0.159709	20	6	2.91544e+06	0.000878173	0.00370765	19	6.01667	1.10815e+06	1.82578e+06	1.64758	252225	181437	185480	448527	2146096	3137695	3610980	2767003	145991	121098	152077	109223	210399	181973	449503	90779	886905
2139	unknown2382	0.0065055	0.0176718	18	6	96995.8	0.0243935	0.159709	20	6	204277	0.00154701	0.0055868	19	6.01667	77924.5	127698	1.63874	14552	16121	15912	29192	145575	204327	279503	187703	9108	9701	12102	8304	14703	15013	29240	8144	62450
2140	unknown2383	0.0065055	0.0176718	18	6	3570.18	0.0200199	0.159709	20	6	7739	0.00129538	0.00487738	19	6.01667	2975.05	4824.3	1.62159	650	463	589	1179	5431	8281	9028	8216	409	428	518	338	552	575	1231	359	2390.44
2141	unknown2384	0.00980952	0.0239973	24	21	1313.27	0.0763581	0.208995	22.7907	17.9999	8621.49	0.00613965	0.0155194	23.3953	19.4742	6957.76	1399.59	0.201156	6928	8880	5825	7037	4499	6240	5188	4507	5894	7134	6712	8590	9415	7708	8575	8788	6995
2142	unknown2385	0.00980952	0.0239973	18	6	8162.49	0.0197324	0.159709	20	6	15809.8	0.00184853	0.00638799	19	6.01667	5970.19	9998.59	1.67475	1173	868	927	1884	12285	16415	19916	14623	825	783	1001	700	1148	980	2075	534	4758.56
2143	unknown2386	0.00267199	0.00936821	18	6	4658.07	0.0197282	0.159709	20	6	9409	0.000571976	0.0027306	19	6.01667	3556.43	5964.19	1.67702	655	555	675	818	7039	9458	11758	9381	463	642	658	440	505	753	868	671	2833.69
2145	unknown2388	0.0299489	0.0559443	18	9	2788.12	0.0241287	0.159709	20	6	6637	0.00594912	0.015135	19	7.6	2712.87	2868.41	1.05733	565	664	462	791	5747	9007	6729	5065	603	666	732	761	875	574	692	451	2149
2146	unknown2389	0.0065055	0.0176718	18	6	8224.36	0.0178357	0.159709	20	6	15362.8	0.00116745	0.00449941	19	6.01667	6081.86	9401.68	1.54586	1776	1720	1590	1678	15979	14045	18831	12596	912	1621	1220	1018	1094	1294	2025	1682	4942.56
2147	unknown239	0.0299489	0.0559443	18	9	7409.42	0.0635428	0.193488	20	6.00002	43492.5	0.0138243	0.030302	19	7.60001	31359.9	9773.54	0.311657	16377	22462	23158	28521	45986	46873	36976	44135	21284	24806	26086	32513	25672	25610	22561	27998	29438.6
2149	unknown2391	0.0144977	0.0319142	18	9	44095.5	0.0161788	0.159709	20	6	334253	0.00219493	0.00721645	19	7.6	144694	139529	0.964302	42404	41802	31678	47355	306339	350569	365132	314971	46633	49766	44708	51117	57345	35632	55798	35008	117266
2150	unknown2392	0.0144977	0.0319142	18	9	10138.1	0.0179158	0.159709	20	6	43884.2	0.0024041	0.00774534	19	7.6	17573	19237.7	1.09473	3267	3306	2542	4039	40285	53056	43309	38887	3537	4515	3643	4168	4754	3217	5519	2617	13791.3
2151	unknown2393	0.0254844	0.0510159	24	6	66.1145	0.0503063	0.178108	20	6	9436	0.00981943	0.022616	22	6.05	2776.83	6271.4	2.25847	45	31	24	94	5738	8345	16067	7594	23	18	33	14	42	18	106	13	2387.81
2152	unknown2394	0.00980952	0.0239973	24	6	687.131	0.0202187	0.159709	20	6	11490.8	0.00188926	0.0064873	22	6.05	3712.84	7233.87	1.94834	555	463	458	1201	8138	14065	12936	10824	330	349	394	280	453	401	1163	216	3264.12
2153	unknown2395	0.0144977	0.0319142	18	6	49020.9	0.0192845	0.159709	20	6	96424	0.00256718	0.0081316	19	6.01667	36618.3	60365.3	1.6485	8294	5949	6428	15377	73401	102760	120648	88887	4898	4145	5451	4005	6135	5642	13885	2947	29303.2
2154	unknown2396	0.000987235	0.00460639	18	6	6845.5	0.4818	0.704319	20	6.00001	15989.8	0.00411476	0.0115252	19	6.01667	10183.7	6078.22	0.596859	8780	7971	5954	2605	19091	15863	16102	12903	5872	5993	4034	2087	18124	10573	8756	6446	9447.12
2155	unknown2397	0.000572095	0.00320048	24	21	4313.35	0.021358	0.159709	24.0327	17.9999	7215.97	0.000150445	0.00110975	24.0163	19.501	3926.22	4520.4	1.15134	8622	7382	6679	4171	950	610	576	741	1112	1172	994	896	10539	7271	5887	5167	3923.06
2158	unknown24	0.0299489	0.0559443	24	9	1118.11	0.153606	0.310511	20	5.99999	4823	0.0293576	0.0565474	22	7.425	3008.64	1347.37	0.447832	1502	1346	2598	3810	5414	5666	4120	4092	562	2991	3014	3579	2014	2411	595	2615	2895.56
2161	unknown2401	0.0254844	0.0510159	24	6	109.955	0.0287188	0.160845	20	6	10743.8	0.00601599	0.0152424	22	6.05	3161.62	7143.68	2.2595	40	18	27	92	7190	10434	15833	9518	28	19	37	24	22	19	179	16	2718.5
2162	unknown2402	0.0299489	0.0559443	18	6	186672	0.0175093	0.159709	20	6	341198	0.00448521	0.0122762	19	6.01667	122965	222387	1.80854	14367	11361	11162	25779	274708	372961	399887	317234	11021	12908	12808	9117	13535	11817	31321	6275	96016.3
2163	unknown2403	0.0065055	0.0176718	18	6	3671.65	0.0180534	0.159709	20	6.00001	8818.75	0.00118028	0.00453874	19	6.01667	4289.51	4421.17	1.03069	2617	2812	2758	2433	9841	9661	6479	9294	1007	1714	1544	1429	2865	1273	2538	1795	3753.75
2164	unknown2404	0.000171384	0.00137171	18	6	6474.27	0.0162978	0.159709	20	6	11598.8	3.85e-05	0.000393308	19	6.01667	4355.64	7371.88	1.69249	826	820	828	800	13196	11440	9670	12089	561	732	662	467	832	1014	905	555	3462.31
2165	unknown2405	0.00164724	0.00666594	24	0	4277.64	0.0590712	0.187903	25.2722	7.27e-05	24489.5	0.000996171	0.00403124	24.6361	3.55e-05	18719.4	5297.88	0.283015	25288	25632	24980	22058	18871	19899	15094	18874	10590	14898	14604	15016	22671	12844	15952	20597	18616.8
2167	unknown2407	0.0144977	0.0319142	24	6	1760.7	0.0227431	0.159709	20	6	21121	0.00297319	0.00909555	22	6.05	7373.39	12724.9	1.72579	1827	1448	1620	3468	15331	20158	28190	20805	1302	1389	1467	1058	1525	1445	3413	899	6584.06
2168	unknown2408	7.77e-06	0.000124608	18	9	75130.3	0.0350486	0.166866	20	6	156408	4.39e-06	7.57e-05	19	7.6	57779.8	75799.6	1.31187	1091	1210	703	562	239975	156951	107490	121214	15608	27442	5128	1436	3685	1343	1124	1106	42879.2
2169	unknown2409	0.0065055	0.0176718	18	9	7558.62	0.0817899	0.218342	20	6.00001	18601	0.00454331	0.0124039	19	7.60001	8439.05	8475.26	1.00429	1873	1899	692	254	29828	17172	14822	12582	5262	9050	3180	928	6974	434	1759	1659	6773
2171	unknown2410	0.00164724	0.00666594	18	6	4520.36	0.0285077	0.160845	20	6	17586.5	0.000514965	0.00255126	19	6.01667	13136.2	4024.23	0.306346	12162	13035	12233	12299	16424	17346	18693	17883	7281	9474	9716	9347	13913	13462	9275	9834	12648.6
2172	unknown2411	0.00267199	0.00936821	18	9	11497.2	0.0205994	0.159709	20	6	31780	0.000594856	0.00280886	19	7.6	11474	14839.5	1.29332	644	545	522	850	28604	36429	39098	22989	798	1184	1079	945	826	712	1215	470	8556.88
2173	unknown2412	0.00164724	0.00666594	18	9	180379	0.0191277	0.159709	20	6	648310	0.000358097	0.0019879	19	7.6	253603	293047	1.15553	34885	30516	28520	49336	549202	729304	775445	539287	57327	57054	56188	55005	43145	34609	71576	24547	195997
2174	unknown2413	0.00267199	0.00936821	18	9	21246.8	0.018063	0.159709	20	6	77556.8	0.000527953	0.00260369	19	7.6	28669	35852.8	1.25058	2327	2058	2023	3454	72624	88286	89406	59911	3397	4289	3469	3432	2760	2423	4358	1721	21621.1
2175	unknown2414	0.0210199	0.0421957	18	6	31609.4	0.0182071	0.159709	20	6	62634	0.00339397	0.010004	19	6.01667	24896	38431	1.54366	7266	6085	5864	6286	66341	63056	72468	48671	4175	7482	5658	3762	5708	5339	9346	6316	20238.9
2176	unknown2415	0.000171384	0.00137171	24	6	1444.62	0.0169401	0.159709	20	6	21367.2	3.99e-05	0.000400114	22	6.05	7942.84	12478.2	1.571	3519	3360	2351	2846	26187	22901	20167	16214	2653	2568	1991	1894	2413	1851	2329	1457	7168.81
2177	unknown2416	0.0065055	0.0176718	24	6	464.216	0.0177059	0.159709	20	6	19260.5	0.0011598	0.0044903	22	6.05	6181.92	12292.1	1.9884	1174	896	710	947	20655	22725	19497	14165	679	982	833	569	879	558	969	473	5419.44
2178	unknown2417	0.000987235	0.00460639	24	6	1933.23	0.0138962	0.159709	20	6	29689	0.000167325	0.00118579	22	6.05	11150.9	17219.2	1.5442	5273	4505	3596	3878	32192	31794	29792	24978	3162	3733	3415	2787	3679	2526	3833	2182	10082.8
2180	unknown2419	0.0299489	0.0559443	18	6	7650.19	0.0200342	0.159709	20	6	14191.5	0.00505117	0.013323	19	6.01667	5145.89	9228.62	1.7934	679	526	531	913	11325	15019	18092	12330	536	546	575	481	698	562	1202	426	4027.56
2181	unknown242	0.0419656	0.0724237	18	9	870.802	0.07808	0.211967	20	6	4706	0.0220223	0.0442695	19	7.6	3342.09	1067.78	0.319495	1758	2383	2514	2833	5310	5091	3702	4721	2308	2470	2726	3328	2757	2643	2433	3138	3132.19
2185	unknown2423	0.000320124	0.00217263	18	6	6410.28	0.0146311	0.159709	20	6	10238.5	6.22e-05	0.000570241	19	6.01667	3954.66	6376.63	1.61244	1096	922	876	872	10807	10526	9896	9725	611	712	670	543	882	1114	958	701	3181.94
2187	unknown2425	0.000572095	0.00320048	24	3	2490.08	0.0287122	0.160845	21.995	6.61e-05	13158.7	0.000197386	0.00132921	22.9975	1.43738	10422.7	3761.72	0.360915	13020	12296	14408	12911	10681	11119	10571	11837	5874	6996	7647	8037	12926	11675	8744	9358	10506.2
2188	unknown2426	0.000987235	0.00460639	24	6	28591	0.0161501	0.159709	20	6	524594	0.000192067	0.0013015	22	6.05	182687	318092	1.74119	70063	57530	41582	44850	592828	592763	507099	405688	36341	42538	38594	30820	39410	28187	49743	29253	162956
2189	unknown2427	0.00267199	0.00936821	24	6	992.071	0.0232615	0.159709	20	6	13584.2	0.000664178	0.0030558	22	6.05	5006.62	7970.88	1.59207	2463	2158	1219	1456	18304	14413	12340	9280	1431	1569	1363	1081	1358	1039	1754	967	4512.19
2191	unknown2429	0.0065055	0.0176718	24	6	315.546	0.0189219	0.159709	20	6	15358.2	0.00123128	0.00469729	22	6.05	4952.46	9776.78	1.97413	990	852	522	739	18397	16585	15703	10748	608	694	689	549	594	560	832	474	4346
2193	unknown2430	0.000320124	0.00217263	24	6	1560.58	0.0157049	0.159709	20	6	24592	6.64e-05	0.000598989	22	6.05	8981.27	14496.3	1.61406	4150	3275	2659	2813	27985	27152	24383	18848	2254	2699	2470	1934	2402	1714	2781	1794	8082.06
2197	unknown2434	0.000987235	0.00460639	18	9	2933.43	0.0175875	0.159709	20	6	14554.8	0.000207682	0.00137083	19	7.6	6765.54	5915.48	0.874355	2609	2505	2004	1931	15890	16105	13823	12401	2836	3109	2821	3463	3093	2195	2930	1928	5602.69
2199	unknown2436	0.00267199	0.00936821	24	6	1368.07	0.0157408	0.159709	20	6	22069.5	0.000465868	0.00236761	22	6.05	8302.35	12807.8	1.54268	3916	3401	2535	2691	25554	22597	22816	17311	2056	2825	2451	2496	2514	2173	2953	1837	7507.88
2201	unknown2438	0.0121536	0.0296814	24	6	830.85	0.0168474	0.159709	20	6	14029.2	0.0019439	0.00662158	22	6.05	5310.38	8169.54	1.53841	2531	2159	1455	1544	16745	14033	14364	10975	1526	1993	1778	1485	1544	1356	2062	1308	4803.62
2202	unknown2439	0.0065055	0.0176718	24	6	15575.3	0.0171379	0.159709	20	6	293370	0.00112623	0.0044052	22	6.05	104566	176728	1.69011	41378	34787	24725	25000	346522	299962	308868	218128	23252	31044	28003	21585	25487	19754	31177	17981	93603.3
2204	unknown2440	0.0299489	0.0559443	24	6	1323	0.0203644	0.159709	20	6	17189	0.00512445	0.0134431	22	6.05	6478.79	10014	1.54565	3656	2554	1642	1702	22256	17843	15980	12677	1790	2286	2160	1851	1886	1524	2438	1477	5857.62
2207	unknown2443	0.0299489	0.0559443	18	6	10314.6	0.0197665	0.159709	20	6	17879	0.00499163	0.0132437	19	6.01667	6715.53	11402.7	1.69796	1110	1046	835	1542	15569	17472	22910	15565	981	972	1098	999	1000	1185	2352	704	5333.75
2208	unknown2444	0.0419656	0.0724237	18	6	12785.9	0.0247335	0.159709	20	6	24096.2	0.00816925	0.0195754	19	6.01667	8439.87	15999.9	1.89575	636	486	505	785	19361	24927	33539	18558	540	627	631	466	592	654	1342	367	6501
2209	unknown2445	0.00536208	0.0162704	24	9	93.3381	0.0178658	0.159709	20	6	7716.5	0.000982242	0.00399728	22	7.425	2327.99	3541.64	1.52133	199	143	96	165	9169	7816	8230	5651	123	163	201	116	116	76	161	67	2030.75
2211	unknown2447	0.0065055	0.0176718	24	6	388.555	0.0132139	0.159709	20	6	7048	0.000890714	0.00374446	22	6.05	2669.4	4115.28	1.54165	1048	918	803	1047	6959	6919	7196	7118	930	754	1023	808	1027	732	910	434	2414.12
2212	unknown2448	0.00267199	0.00936821	24	6	780.646	0.0131516	0.159709	20	6	7070.5	0.000395553	0.00213826	22	6.05	3133.77	3665.84	1.16979	1836	1777	1441	1817	6612	6652	7268	7750	1572	1311	1799	1334	1690	1431	1557	655	2906.38
2213	unknown2449	0.0065055	0.0176718	24	6	56614.7	0.0135983	0.159709	20	6	1555678	0.000914088	0.00380577	22	6.05	537519	957747	1.78179	154175	132596	111961	130968	1528354	1644570	1518683	1531105	120967	107520	146956	104178	141712	101179	123890	50938	478110
2215	unknown2450	0.000987235	0.00460639	24	6	2605.16	0.0133501	0.159709	20	6	57555	0.000161278	0.00115236	22	6.05	20908	34404.9	1.64554	7405	6487	5914	6944	58667	59457	52024	60072	5937	5134	7017	5498	6302	5088	5692	2744	18773.9
2216	unknown2451	0.0419656	0.0724237	24	9	777.287	0.013634	0.159709	20	6	17555	0.00484394	0.0129688	22	7.425	6129.43	7534.84	1.22929	2074	1569	1209	1461	17509	17862	18110	16739	1562	1415	1768	1511	1781	1177	1544	662	5497.06
2217	unknown2452	0.00267199	0.00936821	24	9	1070.21	0.014014	0.159709	20	6	30647.5	0.000419113	0.00221582	22	7.425	10384.9	13457.7	1.29589	2604	2206	1864	2170	29520	28270	31291	33509	2074	2446	2991	2211	2221	1606	2090	1014	9255.44
2218	unknown2453	0.00267199	0.00936821	24	6	252.26	0.014807	0.159709	20	6	34352.2	0.000440649	0.00227534	22	6.05	10286	22697.6	2.20665	554	431	340	470	36673	30359	37051	33326	411	349	557	389	402	253	372	112	8878.06
2223	unknown2458	0.0210199	0.0421957	24	9	1739.84	0.0200707	0.159709	20	6	12103.2	0.00370025	0.0106885	22	7.425	6072.57	4163.7	0.685658	3660	3574	2862	3137	12098	13298	11308	11709	2846	3839	4255	4735	5425	3319	2608	2897	5723.12
2227	unknown2461	0.00421867	0.0128369	24	0	2252.84	0.104566	0.248314	25.2722	6.63e-05	8296.98	0.00384939	0.0109874	24.6361	3.23e-05	5826.14	2525.1	0.433408	8817	8595	8756	7020	5112	5405	2363	5436	3415	4443	4200	4160	7924	3380	5766	7643	5777.19
2228	unknown2462	0.000572095	0.00320048	18	6	3202.84	0.0208621	0.159709	20	6	6851.25	0.000147232	0.00109351	19	6.01667	2950.52	3918.37	1.32803	1343	1516	1041	857	6618	8285	5194	7308	573	704	752	757	1420	790	854	1599	2475.69
2230	unknown2464	0.000572095	0.00320048	24	6	727.259	0.0125131	0.159709	20	6	6694.5	9.2e-05	0.000764914	22	6.05	2781.25	3594.94	1.29257	1528	1343	1236	1640	6069	6851	6987	6871	1224	877	1287	889	1185	1140	1279	526	2558.25
2231	unknown2465	0.00421867	0.0128369	24	6	58122.8	0.0135643	0.159709	20	6	1.5537e+06	0.000616211	0.00287643	22	6.05	522702	967248	1.85048	131052	108613	98801	128903	1450681	1609419	1599645	1555049	101871	82937	117950	79428	111282	78203	110986	38429	462703
2232	unknown2466	0.0499351	0.0858693	24	6	1107.33	0.0142589	0.159709	20	6	32022.5	0.0058723	0.0149998	22	6.05	10917.6	19879.7	1.82088	2676	2182	2055	2728	29500	31522	34936	32132	2192	2266	2573	2055	2950	1691	2480	1014	9684.5
2233	unknown2467	0.0299489	0.0559443	18	6	5027.88	0.0148724	0.159709	20	6	9085.75	0.00388245	0.0110381	19	6.01667	3670.89	5489.88	1.49552	1269	890	1172	1105	7958	10348	9302	8735	864	852	1110	844	1163	899	1157	422	3005.62
2234	unknown2468	0.00980952	0.0239973	24	6	2611.35	0.013537	0.159709	20	6	55564.8	0.00131819	0.0049375	22	6.05	19618.5	33644.5	1.71494	6204	5150	5037	6382	50376	57555	56718	57610	5044	4063	5430	4037	5422	4098	5319	2059	17531.5
2235	unknown2469	0.00980952	0.0239973	24	6	565.332	0.0145652	0.159709	20	6	14534.5	0.00140785	0.00520581	22	6.05	5042.99	8941.08	1.77297	1391	1234	973	1382	13648	14677	16505	13308	1276	988	1325	1095	1357	908	1225	522	4488.38
2237	unknown2470	0.0144977	0.0319142	24	6	1075.51	0.0180038	0.159709	20	6	15180.5	0.00241463	0.00776771	22	6.05	6284.2	8387.23	1.33465	2477	1881	3392	3518	11163	17245	17041	15273	2325	2731	3089	2744	2800	2609	2078	1857	5763.94
2238	unknown2471	0.0299489	0.0559443	18	9	4444.17	0.833769	1	20	5.99999	21862.8	0.117113	0.179528	19	7.59999	17758.2	4330.99	0.243887	13286	13256	13068	11335	12136	18049	22792	34474	13756	19770	19610	16132	19482	15124	13540	14699	16906.8
2239	unknown2472	0.0299489	0.0559443	24	6	206.122	0.0144218	0.159709	20	6	6921.25	0.00377811	0.0108267	22	6.05	2386.81	4258.92	1.78436	581	607	538	578	6267	6801	7651	6966	516	489	613	409	618	456	579	293	2122.62
2242	unknown2475	2.89e-06	5.71e-05	18	9	2553.01	0.015336	0.159709	20	6	19835	7.94e-07	1.92e-05	19	7.6	7125.09	9359.33	1.31357	220	308	225	141	18619	18169	21446	21106	747	1050	490	378	618	329	376	342	5285.25
2243	unknown2476	0.000572095	0.00320048	18	9	1914.85	0.226373	0.406551	20	5.99999	7237.75	0.00128882	0.00486115	19	7.59999	4410.84	2314.1	0.524639	2113	2251	2174	1374	4116	6305	8331	10199	3074	3941	3408	2289	4945	3170	2807	2798	3955.94
2245	unknown2478	0.0419656	0.0724237	18	9	1233.55	0.0582498	0.187265	20	5.99999	4090.5	0.0171454	0.0360038	19	7.6	2440.24	1250.09	0.51228	1357	1367	1292	1414	3156	3558	4802	4846	1310	1742	1671	1760	2114	2306	1263	1154	2194.5
2249	unknown2481	0.0065055	0.0176718	24	15	671.751	0.182421	0.349415	23.9024	12	4600.25	0.00918127	0.0214891	23.9512	13.497	3906.78	754.992	0.193252	2826	3879	2833	3324	3784	4235	3339	3150	4016	4326	4697	5362	5079	3578	3922	4148	3906.12
2250	unknown2482	1.91e-05	0.00025515	18	9	17354.2	0.0222688	0.159709	20	6	77694.5	6.66e-06	0.00010087	19	7.6	45034.9	28400.4	0.63063	19858	23443	17279	18264	78222	81690	71525	79341	29707	34907	31888	40617	33179	22201	26148	22963	39452
2251	unknown2483	4.22e-05	0.000465917	18	9	847.114	0.0192175	0.159709	20	6.00002	4970.25	1.22e-05	0.000163274	19	7.60001	2837.81	1771.23	0.624154	1414	1510	1218	1212	4838	5324	4836	4883	1857	2001	2009	2237	2070	1417	1549	1459	2489.62
2252	unknown2484	0.00421867	0.0128369	24	6	2705.57	0.0148407	0.159709	20	6	79166.8	0.000668567	0.00306663	22	6.05	26749.6	49191.8	1.83897	6079	5757	5128	7339	67304	80319	89943	79101	4684	4536	6355	4632	5186	4198	6350	2261	23698.2
2253	unknown2485	0.0299489	0.0559443	24	3	2648.11	0.0886045	0.226213	20	6	14359.5	0.0183944	0.0381272	22	4.675	12628.4	1876.01	0.148555	15006	14877	14573	12113	14147	14826	13681	14784	6878	10337	10001	10509	15397	12925	9642	11437	12570.8
2254	unknown2486	0.00267199	0.00936821	24	9	102.177	0.0156341	0.159709	20	6	10516.2	0.000462993	0.00236196	22	7.425	3294.73	4757	1.44382	318	378	320	342	8891	10316	11777	11081	374	363	390	429	409	354	285	301	2895.5
2256	unknown2488	0.00267199	0.00936821	18	9	989.949	0.0165805	0.159709	20	6	10904	0.000488416	0.00245626	19	7.6	6422.38	3394.66	0.528567	4156	3908	3921	3401	10632	10431	11285	11268	3682	4787	4301	4337	4210	4404	3192	4166	5755.06
2257	unknown2489	0.00267199	0.00936821	18	9	861.963	0.0200164	0.159709	20	5.99999	5419	0.000579557	0.00275668	19	7.6	3220.68	1697.13	0.526949	1978	1952	1890	1687	5649	4865	5475	5687	1763	2485	2238	2337	2173	2343	1541	2130	2887.06
2261	unknown2492	0.00980952	0.0239973	18	6	12248.5	0.0165017	0.159709	20	6	21215.5	0.00157482	0.00565889	19	6.01667	7536.57	13968.4	1.85342	856	677	579	806	17907	20809	25252	20894	716	610	689	685	737	752	731	802	5843.88
2263	unknown2494	0.0419656	0.0724237	24	9	2007.65	0.0153167	0.159709	20	6	43390.8	0.00536698	0.0138989	22	7.425	15320.3	18587.5	1.21326	4519	3706	3629	4402	38186	43016	51008	41353	4397	3932	5097	3447	4257	3049	4600	1567	13760.3
2264	unknown2495	0.0299489	0.0559443	24	6	294.687	0.0139111	0.159709	20	6	6098	0.00365934	0.0105986	22	6.05	2418.09	3465.45	1.43314	944	880	969	1014	5694	6114	6531	6053	920	875	1141	734	993	835	970	583	2203.12
2265	unknown2496	0.00980952	0.0239973	24	9	860.019	0.0181336	0.159709	20	6	26333.5	0.00171378	0.00606265	22	7.425	8836.39	11601.2	1.31289	1966	1512	1631	1695	20597	24037	32148	28552	1741	1967	2332	1656	2086	1246	1854	784	7862.75
2267	unknown2498	0.00980952	0.0239973	24	6	460.68	0.0130191	0.159709	20	6	6321.75	0.00127274	0.00481728	22	6.05	2603.79	3505.93	1.34647	1172	1146	1032	1336	5857	6311	6556	6563	1242	974	1360	928	1107	988	1126	483	2386.31
2268	unknown2499	0.0419656	0.0724237	24	9	659.731	0.0145474	0.159709	20	6	20900	0.00512887	0.0134431	22	7.425	7278.15	8988.95	1.23506	2117	1651	1663	1752	20973	19072	23372	20183	1960	1729	1964	1693	1857	1227	2122	1045	6523.75
2271	unknown2500	0.0144977	0.0319142	24	6	1794.28	0.0400258	0.167576	20	6	6205.75	0.00490455	0.0130803	22	6.05	3964.64	1567.04	0.395255	5818	3901	4009	2795	6831	6858	4774	6360	1576	2633	2279	2412	3510	1638	2556	3929	3867.44
2272	unknown2501	0.0065055	0.0176718	24	0	3069.37	0.1032	0.246473	26.1721	6.63e-05	14686.7	0.0055765	0.0143301	25.0861	3.18e-05	10323.4	3845.11	0.372465	16966	15421	14222	12138	9131	11054	6680	9537	5349	8551	7123	7842	11926	5447	8916	12943	10202.9
2273	unknown2502	0.0419656	0.0724237	18	0	2040.36	0.203767	0.377056	26.1721	6.63e-05	6529.23	0.0492693	0.0866164	22.0861	2.8e-05	3891.24	1676.7	0.430892	8253	6599	6535	4730	3767	2977	1662	2747	1910	3787	2350	2899	3833	1636	3804	6771	4016.25
2274	unknown2503	0.00164724	0.00666594	24	3	1072.68	0.0525158	0.180403	21.4599	6.63e-05	6647.24	0.000895798	0.00375899	22.7299	1.42066	5408.91	1761.52	0.32567	6316	6712	7528	6033	5326	5817	5351	6298	3031	4016	4052	4331	6936	5933	4607	5091	5461.12
2275	unknown2504	0.0210199	0.0421957	24	0	1242.03	0.253601	0.441001	27.4766	6.63e-05	5965.49	0.0332328	0.0627827	25.7383	3.11e-05	4220.83	1196.29	0.283425	6202	6198	5811	5651	4022	3991	2641	3443	2601	3731	3310	3852	1460	3649	4467	5621	4165.62
2277	unknown2506	0.0419656	0.0724237	18	6	2167.11	0.0414814	0.168276	20	6	5470	0.0128008	0.0284827	19	6.01667	2150.5	3374.61	1.56922	542	456	372	794	3435	7601	7020	3824	488	416	409	361	608	398	871	270	1741.56
2279	unknown2508	1.91e-05	0.00025515	24	0	2371.99	0.025368	0.159709	25.1282	6.63e-05	9983.48	7.53e-06	0.000110476	24.5641	3.24e-05	6942.59	3142.1	0.452583	10603	10100	11090	8141	5104	5068	5857	6410	3569	4598	4878	5426	8430	7939	5879	7118	6888.12
2280	unknown2509	0.0299489	0.0559443	18	0	3175.44	0.504994	0.72549	20	12	15774.5	0.078516	0.127954	19	15.2	14317.5	4400.11	0.307324	17710	17588	15275	18850	7796	13546	9648	10941	11982	14193	15271	21652	18500	12793	14120	16351	14763.5
2283	unknown2511	0.0210199	0.0421957	18	0	35759.8	0.205838	0.379914	20	17.9999	146617	0.0278766	0.0540549	19	18.05	120898	31578.6	0.261201	153587	173957	121838	167235	63305	116465	63890	90805	107746	110730	123499	164618	179130	110095	147260	149983	127759
2285	unknown2513	0.0065055	0.0176718	18	6	4862.07	0.129741	0.279448	20	6	24271	0.00681749	0.0169093	19	6.01667	19264.2	4597.06	0.238632	18465	18323	18177	17774	20868	25459	24598	26159	10034	15258	14858	16997	22170	21192	13393	15589	18707.1
2287	unknown2515	0.0419656	0.0724237	18	6	4328.55	0.392727	0.604425	20	6	22634.8	0.0841445	0.135646	19	6.01666	18389.4	4130.76	0.224627	16830	16296	15846	17803	18824	23429	23129	25157	9592	14836	13668	19464	22196	19775	13602	15775	17888.9
2288	unknown2516	0.000987235	0.00460639	18	0	15348.8	0.111269	0.25689	23.52	17.9999	46783.7	0.00111127	0.00435505	20.76	18.3238	38026.4	13987.4	0.367834	52777	57093	42154	59686	19932	34730	20032	28884	28620	29957	33407	45746	56882	35509	45952	48792	40009.6
2289	unknown2517	0.00267199	0.00936821	18	0	1659.23	0.266624	0.45704	20	17.9999	5517.99	0.00587521	0.0149998	19	18.05	4627.6	1322.46	0.285778	6245	6683	5157	6908	2710	4341	2987	3619	3250	3903	4160	6604	6618	4505	4834	6115	4914.94
2290	unknown2518	0.0144977	0.0319142	18	6	2192.21	0.0374598	0.167316	20	6	6911.5	0.0046261	0.0125744	19	6.01667	4517.57	2332.85	0.516395	3618	4236	3223	3495	5698	7286	7857	6805	1964	2735	2733	3966	4315	3900	2553	3374	4234.88
2295	unknown2522	0.000171384	0.00137171	18	9	5979.65	0.014744	0.159709	20	6	36595.8	3.51e-05	0.00037154	19	7.6	14895.7	16463.5	1.10525	2877	2887	2445	2602	34580	41167	36095	34541	4348	4613	4556	4939	3335	2526	3262	1777	11659.4
2296	unknown2523	0.00980952	0.0239973	18	6	930.376	0.106377	0.250879	20	5.99999	4280.25	0.00820739	0.0196342	19	6.01666	3402.45	835.165	0.245459	3030	2711	3899	2893	3925	4221	4430	4545	2010	3206	2614	2848	3381	3492	3082	2533	3301.25
2298	unknown2525	0.0065055	0.0176718	18	6	1277.03	0.129191	0.278724	20	6	8711.25	0.00679219	0.016883	19	6.01667	7229.71	1277.75	0.176736	7107	7636	7127	6718	10687	8243	8891	7024	4183	5727	5585	6221	7639	6686	6267	7457	7074.88
2311	unknown2537	0.00421867	0.0128369	24	9	188.444	0.0151786	0.159709	20	6	6025.5	0.000682347	0.00310028	22	7.425	2054.74	2633.19	1.28152	405	440	392	539	5455	5795	7051	5801	466	464	589	433	409	353	540	208	1833.75
2312	unknown2538	0.00164724	0.00666594	24	3	2974.62	0.08209	0.218713	20.7529	6.63e-05	18940.2	0.00133986	0.00500569	22.3765	1.39857	16094.7	4023.22	0.249973	19893	19118	19831	16919	17973	17307	16438	19099	8469	13524	12189	14286	20403	14889	14392	15388	16257.4
2315	unknown2540	0.0210199	0.0421957	24	15	740.518	0.141754	0.295236	20	12	5674.25	0.0203092	0.041422	22	13.475	4243.14	1787.78	0.421334	3033	3963	3038	3520	3123	4488	3167	4433	4220	5823	5453	7201	4758	3134	3663	4104	4195.06
2316	unknown2541	0.0065055	0.0176718	24	12	980.757	0.0798357	0.214847	20.8511	12	4947	0.00444732	0.0122111	22.4255	12.0594	3523.63	1460.67	0.414535	2301	2803	2153	2447	2674	3840	2757	3939	3969	4851	4577	6391	4077	2256	3031	3189	3453.44
2317	unknown2542	0.0299489	0.0559443	24	9	536.694	0.0140165	0.159709	20	6	7589.75	0.0036839	0.0106555	22	7.425	2762.11	3208.75	1.1617	908	954	482	924	7409	7604	7162	8184	697	1113	731	944	1125	539	536	573	2492.81
2318	unknown2543	0.00980952	0.0239973	24	3	743.523	0.0704137	0.201116	20.2759	6.63e-05	4236.25	0.00571766	0.0146407	22.1379	1.38366	3674.58	816.438	0.222185	4701	4421	4018	3805	3905	4220	4136	4679	2056	3069	2714	3227	4360	3483	2922	3709	3714.06
2319	unknown2544	0.0210199	0.0421957	24	12	1202.79	0.083032	0.219492	20	12	6206.5	0.0128295	0.0285174	22	12.1	4504.4	1813.03	0.402503	3441	3827	2791	3227	3234	5903	3522	4231	5384	5874	6313	7255	4829	2757	3805	3966	4397.44
2321	unknown2546	0.0065055	0.0176718	24	9	1015.76	0.0163721	0.159709	20	6	21365.2	0.00108077	0.00428156	22	7.425	7537.97	9198.98	1.22035	1758	1665	1562	2242	18447	23163	24380	19471	1981	2145	2398	1929	1832	1407	2861	1014	6765.94
2322	unknown2547	0.00980952	0.0239973	18	6	3900.93	0.0280133	0.160845	20	6	18006.2	0.00252799	0.00803685	19	6.01667	14113.1	3436.67	0.243509	13938	13928	14632	12584	17158	18267	18056	18544	8004	10736	10445	12132	14112	13904	10133	12574	13696.7
2326	unknown2550	1.91e-05	0.00025515	18	9	4298.86	0.0148368	0.159709	20	6	36101.5	4.55e-06	7.7e-05	19	7.6	14731.1	16310.2	1.10719	2439	2983	2717	1635	33489	38099	36980	35838	3842	6431	4469	4102	3001	3121	2631	2621	11524.9
2327	unknown2551	0.0419656	0.0724237	24	3	1248.4	0.199296	0.371388	20.6557	6.63e-05	9885	0.0483738	0.0854584	22.3279	1.39553	8580	1900.94	0.221555	9498	9763	11399	8880	9200	9305	8746	9263	5767	6985	6479	7903	10012	11027	7221	7110	8659.88
2328	unknown2552	8.88e-07	2.07e-05	18	9	3801.41	0.014753	0.159709	20	6	48092.2	2.51e-07	8.23e-06	19	7.6	18999.4	21966.5	1.15617	2642	3009	2509	1806	46155	49545	49436	47233	4182	6307	4791	4707	3671	3186	3022	2700	14681.3
2331	unknown2555	0.0065055	0.0176718	18	6	962.019	0.1043	0.248078	20	6.00001	3895.25	0.00562876	0.0144424	19	6.01667	2918.21	978.057	0.335157	2363	2640	2463	2365	3505	3848	4340	3888	1726	2301	2229	2378	3015	3400	2014	2320	2799.69
2333	unknown2557	0.0065055	0.0176718	18	6	1179.45	0.0381215	0.167576	20	6	6901	0.00230691	0.00752084	19	6.01667	5664.15	1044.6	0.184424	5910	5855	5669	5392	7275	7461	6427	6441	3574	4571	4580	4766	6067	5514	4315	4784	5537.56
2335	unknown2559	0.0144977	0.0319142	18	6	1577.38	0.837036	1	20	6	6808.75	0.065671	0.109917	19	6.01667	5160.54	1758.53	0.340764	4901	3461	4270	3221	5451	9323	6059	6402	2521	3833	3497	4663	8348	4444	4821	3944	4947.44
2340	unknown2563	0.0419656	0.0724237	18	6	1013.99	0.376329	0.584663	20	6.00001	4588.25	0.0813048	0.131657	19	6.01667	3378.05	1227.96	0.363512	2555	3104	2612	2672	3894	3991	5599	4869	1758	2452	2626	2559	3684	4825	2142	2326	3229.25
2341	unknown2564	0.0065055	0.0176718	18	6	1025.3	0.998386	1	20	5.99999	4940.5	0.0392085	0.0716945	19	6.01666	4230.59	764.069	0.180606	3991	2997	4270	3209	5451	4538	5124	4649	2521	3225	2893	3772	8300	4421	3481	3366	4138
2342	unknown2565	0.00164724	0.00666594	18	6	4104.05	0.0275077	0.160845	20	6.00001	9887.25	0.000498518	0.00249547	19	6.01667	6070.17	3506.49	0.57766	5558	6709	4951	4012	9241	9796	8922	11590	1955	3098	2960	2753	6460	3489	3328	5502	5645.25
2343	unknown2566	0.00164724	0.00666594	18	6	2407.17	0.0296802	0.160845	20	6.00002	5174	0.000534174	0.00262242	19	6.01667	2819.52	2217.44	0.786458	2298	2871	2147	1407	4822	5840	4437	5597	511	1050	1027	922	3188	1366	982	2348	2550.81
2346	unknown2569	0.000320124	0.00217263	24	3	771.453	0.0610669	0.189557	23.52	4.98e-05	15595	0.000231511	0.00148168	23.76	1.48503	14345.2	1596.96	0.111324	15708	16673	14930	15069	13604	14602	14694	14910	14025	11993	13339	12805	14873	14345	13954	14114	14352.4
2347	unknown257	0.0210199	0.0421957	18	9	866.206	0.116151	0.261944	20	6	8977	0.0171273	0.0359831	19	7.6	3717.3	3952.59	1.06329	1013	111	898	675	974	11816	11803	11315	1332	1587	1265	378	1227	934	878	839	2940.31
2349	unknown2571	0.0210199	0.0421957	24	0	2640.69	0.136113	0.288481	26.0177	6.63e-05	21375.5	0.0196171	0.0401997	25.0088	3.19e-05	17601.7	3308.84	0.187984	21551	23243	21126	19582	18144	17101	13013	15838	13956	14145	14970	17714	21062	17082	15361	16183	17504.4
2350	unknown2572	0.0065055	0.0176718	18	6	1144.45	0.435793	0.651808	20	6	7228	0.0194646	0.0400008	19	6.01667	4117.72	3194.86	0.775882	2363	2247	2971	2349	14147	7015	4066	3684	1857	2346	2193	3290	3267	2250	3153	2491	3730.56
2351	unknown2573	0.0210199	0.0421957	24	6	1209.86	0.0534438	0.181327	20	6.00001	6506.75	0.00875272	0.0206311	22	6.05	5372.95	564.458	0.105056	6163	6273	5725	4974	6788	6192	6471	6576	3339	4157	4220	4614	5979	5488	3676	4772	5337.94
2353	unknown2575	0.0065055	0.0176718	24	3	534.219	0.0969393	0.238222	26.0177	7.85e-05	4354.25	0.00527767	0.0137334	25.0088	1.56309	3717.1	617.011	0.165992	4391	4675	4284	4067	3407	4202	3529	4004	2609	3455	3175	3555	3096	4022	3349	3520	3708.75
2354	unknown2576	0.000171384	0.00137171	24	3	1106.09	0.0561252	0.183796	24.2975	4.6e-05	5774.75	0.000120735	0.000941952	24.1488	1.50932	4546.38	1477.37	0.324955	5584	6252	5817	5446	4864	4934	4005	4797	2967	3328	3491	3598	6050	3872	3722	3955	4542.62
2355	unknown2577	0.00421867	0.0128369	18	6	379.363	0.203484	0.376692	20	5.99999	1502.5	0.00691929	0.0171301	19	6.01666	1072.01	430.252	0.40135	763	892	908	889	1223	1316	1733	1738	574	610	760	792	1258	1322	822	718	1019.88
2357	unknown2579	0.0210199	0.0421957	18	6	947.346	0.60389	0.829583	20	6	6652.75	0.0681226	0.113233	19	6.01667	3768.24	2946.96	0.782053	1902	2320	3006	1926	14152	5947	3487	3025	1709	1911	2206	2474	2601	2139	3660	2113	3411.12
2358	unknown258	8.88e-07	2.07e-05	18	9	2311.53	0.0168695	0.159709	20	6	10436.2	2.85e-07	8.28e-06	19	7.6	4043.54	4806.52	1.18869	468	456	369	401	9308	12220	9378	10839	881	1028	1096	728	732	635	496	544	3098.69
2359	unknown2580	0.00980952	0.0239973	24	0	1092.48	0.230711	0.411949	24.0327	6.63e-05	4772.24	0.0160481	0.0343428	24.0163	3.31e-05	3436.42	1611.9	0.469063	6034	3741	3818	5496	2980	3370	2403	3190	1516	2379	2258	2336	6330	2115	3935	3068	3435.56
2361	unknown2582	0.0144977	0.0319142	18	0	1864.99	0.397388	0.609094	27.1385	17.9999	6242.75	0.0354696	0.0662423	22.5692	18.7693	6413.56	1449.02	0.22593	8953	8576	9324	7380	5289	5329	4064	5926	4788	7298	5802	6328	7817	4937	5552	6665	6501.75
2362	unknown2583	0.00267199	0.00936821	18	9	9316.13	0.114379	0.260072	20	6	40365.2	0.00277906	0.00859523	19	7.6	28157.6	10145.4	0.360307	14230	18659	17311	19430	36145	42489	39913	42914	19889	20362	24947	26974	29753	29316	19399	16881	26163.2
2363	unknown2584	0.0065055	0.0176718	24	3	1274.56	0.123372	0.271997	23.3952	6.63e-05	5740.25	0.00652325	0.0163175	23.6976	1.48113	4493.96	1461.2	0.325147	6365	5778	6278	4540	5675	5057	4281	4579	2372	3905	3262	3197	4308	2724	3903	5814	4502.38
2367	unknown2588	0.0144977	0.0319142	24	6	3915.6	0.0209076	0.159709	20	6	39777	0.00275876	0.00855689	22	6.05	14580.4	23523.6	1.61337	4503	3333	3844	6303	36056	41095	50387	31570	4305	3347	4330	3047	3713	2902	8852	2353	13121.2
2368	unknown2589	0.00421867	0.0128369	18	6	1246.98	0.0713164	0.202475	20	6.00002	5510	0.0027405	0.00853081	19	6.01667	4213.05	1223.3	0.29036	3911	3590	4157	3743	5190	5150	5784	5916	2557	3041	3382	3481	4204	4904	2715	3312	4064.81
2372	unknown2592	0.0144977	0.0319142	18	6	7497.1	0.187787	0.356473	20	6.00001	43237.5	0.018802	0.0387864	19	6.01667	35911.3	7392.73	0.205861	32362	33530	33233	29758	43788	44352	44180	40630	22959	30285	31045	35783	40505	35123	30802	31912	35015.4
2373	unknown2593	0.0419656	0.0724237	18	6	350.902	0.139556	0.293176	20	5.99998	2937.25	0.0359604	0.0669426	19	6.01666	2606.65	312.248	0.119789	2470	2630	2618	2339	2993	2876	3047	2833	2069	2266	2275	2736	2720	2531	2259	2439	2568.81
2374	unknown2594	0.0144977	0.0319142	18	6	4418.71	0.176635	0.340075	20	6	27264.8	0.0178422	0.0371427	19	6.01667	22945.7	4553.13	0.198431	20579	21219	20712	18373	29304	26359	27809	25587	18623	19616	19060	23920	24371	20966	23030	18775	22393.9
2382	unknown2600	0.00980952	0.0239973	18	6	908.455	0.0417384	0.168276	20	6.00001	4995.75	0.00360332	0.010487	19	6.01667	4141.75	677.186	0.163502	3958	4380	4903	3928	5347	4746	4803	5087	2312	3238	3188	3434	4295	4350	3595	3391	4059.69
2383	unknown2601	0.00267199	0.00936821	18	0	1268.2	0.0282205	0.160845	20	17.9999	4372.5	0.000791197	0.00343964	19	18.05	3208.25	1211.27	0.377548	3875	4658	4508	4186	1710	1804	1774	1604	2700	3077	3711	4446	5086	4130	4185	4089	3471.44
2385	unknown2603	0.00164724	0.00666594	18	6	1100.97	0.0661329	0.196625	20	6	5254	0.00110296	0.00432984	19	6.01667	4244.34	901.791	0.212469	3632	4395	4526	3850	5464	5116	5072	5364	2335	3358	3549	3362	4512	4554	3733	3339	4135.06
2386	unknown2604	0.000572095	0.00320048	18	6	9693.73	0.0433174	0.168276	20	6	23847.5	0.000287601	0.001692	19	6.01667	10646.8	13222.1	1.24189	5486	4410	5484	3687	35591	20178	23899	15722	1913	3903	2799	2113	4458	5103	4924	5042	9044.5
2388	unknown2606	0.00164724	0.00666594	24	0	4287.9	0.0486139	0.175488	24.9858	6.63e-05	11838	0.000835423	0.00357096	24.4929	3.25e-05	7087.24	5074.07	0.715944	12488	12044	13851	8969	5127	4809	2940	4366	2808	4455	3593	3913	9199	4275	6995	12324	7009.75
2389	unknown2607	0.0065055	0.0176718	24	0	1003.38	0.138668	0.292182	24.5682	6.63e-05	6262.74	0.00722657	0.0177186	24.2841	3.28e-05	5023.83	1388.9	0.276462	6223	6172	7428	5228	5714	3968	4179	4725	2591	4269	4778	3896	5204	4576	6280	4950	5011.31
2390	unknown2608	0.000320124	0.00217263	18	6	3636.65	0.0340732	0.166163	20	6	9572.25	0.000135539	0.00103143	19	6.01667	5352.4	4230.99	0.790485	3616	3316	3475	3287	11166	7066	9978	10079	1763	3305	2985	2319	3313	4943	3417	3407	4839.69
2391	unknown2609	4.22e-05	0.000465917	18	6	119307	0.0308369	0.161456	20	6	245658	1.89e-05	0.000233507	19	6.01667	101778	146713	1.4415	31422	26668	33592	27451	336867	196448	259594	189724	19205	23573	26211	20874	41987	50996	35750	23622	83999
2393	unknown2610	0.000171384	0.00137171	18	6	5417.85	0.0277884	0.160845	20	6	11328.8	6.31e-05	0.000576653	19	6.01667	5022.75	6399.6	1.27412	2207	1723	2174	1700	14880	8967	11693	9775	1164	1350	1673	1418	2491	3056	2147	1538	4247.25
2394	unknown2611	8.77e-05	0.00082364	18	6	43723.2	0.0305789	0.161456	20	6	88393.5	3.71e-05	0.000383214	19	6.01667	34798.7	54519	1.56669	8440	8141	9330	8067	125078	69018	91552	67926	5169	6237	6441	4565	10796	14161	9972	6181	28192.1
2395	unknown2612	0.0210199	0.0421957	24	0	1778.02	0.254865	0.442666	25.8651	6.63e-05	9407.48	0.0333718	0.0629904	24.9326	3.2e-05	7081.41	2067.87	0.292013	10352	10281	8777	8220	7775	7665	4211	6538	3965	6089	5284	6014	8664	3539	6202	8819	7024.69
2396	unknown2613	0.0065055	0.0176718	18	6	1214.81	0.0418422	0.168276	20	6	5816.5	0.00250672	0.00799859	19	6.01667	4561.11	1114.93	0.244442	4485	4747	4418	4115	5624	5841	5976	5825	2591	3513	3763	3851	4869	4598	3042	3558	4426
2397	unknown2614	0.0210199	0.0421957	24	18	1185.99	0.209377	0.38546	26.4865	17.9999	8824.24	0.0282809	0.0546924	25.2432	18.0437	6775.81	1678.17	0.24767	6606	6462	6719	5380	3995	4315	4872	7928	5100	6876	6406	7499	10887	8002	7053	9355	6715.94
2398	unknown2615	0.000987235	0.00460639	18	6	10320.2	0.0399287	0.167576	20	6	24788.8	0.000439177	0.00227197	19	6.01667	11884.6	12599.4	1.06015	8270	6617	8395	4941	34570	19654	27559	17372	1834	4389	2778	1855	5846	7167	6334	8144	10357.8
2399	unknown2616	0.000171384	0.00137171	18	6	24608.2	0.0292262	0.160845	20	6	50268.8	6.61e-05	0.000598989	19	6.01667	20012.5	30898.6	1.54396	4787	4669	5830	3839	68192	39295	54985	38603	3240	4205	4490	3214	6572	8205	6239	3927	16268.2
2401	unknown2618	0.0419656	0.0724237	24	9	280.368	0.234015	0.415746	20	5.99998	2042.25	0.0552237	0.0952285	22	7.42499	1516.21	401.608	0.264877	1709	1325	1231	795	2769	1880	1954	1566	1281	1730	1208	1342	1202	1238	1108	1382	1482.5
2406	unknown2622	0.0299489	0.0559443	18	9	937.27	0.269434	0.460217	20	6	5128.5	0.0469607	0.083336	19	7.6	4091.68	847.92	0.20723	3243	3655	2704	2989	5338	4994	5089	5093	2732	3565	3846	4364	4476	4164	2905	3643	3925
2408	unknown2624	0.000320124	0.00217263	18	6	5194.41	0.0889453	0.226802	20	6	14653.2	0.000326493	0.00186506	19	6.01667	6489.57	8228.5	1.26796	3246	2485	3186	1782	24802	11058	14255	8498	1330	2527	1378	1079	2234	4014	2712	3293	5492.44
2409	unknown2625	0.00421867	0.0128369	18	6	2036.82	0.052431	0.180403	20	6.00001	7342.5	0.00208282	0.0069642	19	6.01667	5405.46	1935.87	0.358132	4139	4544	4725	4675	6956	7124	7608	7682	3215	4065	4246	4497	5454	5644	3695	4465	5170.88
2410	unknown2626	0.000987235	0.00460639	18	6	1528.41	0.109966	0.254899	20	6	4550.5	0.00109954	0.00432424	19	6.01667	2172.19	2383.83	1.09744	1238	1130	1243	809	7839	3097	4450	2816	519	1150	662	569	931	1296	1011	1373	1883.31
2411	unknown2627	0.00267199	0.00936821	24	0	1019.29	0.0537492	0.181591	25.5652	6.63e-05	5128.49	0.0014144	0.00522555	24.7826	3.21e-05	3813.53	1246.36	0.326826	4752	5420	5517	4825	3512	3420	2649	3257	2234	3138	3141	3177	4923	3088	3467	4029	3784.31
2412	unknown2628	0.000320124	0.00217263	18	6	12233.5	0.0840805	0.220795	20	6.00001	33690.5	0.00031015	0.00178821	19	6.01667	14650	18966.1	1.29462	7055	5971	8515	4218	56014	22199	36773	19776	1801	4523	2545	1343	5030	9140	6361	6363	12351.7
2413	unknown2629	0.000320124	0.00217263	18	6	3176.85	0.101469	0.244195	20	6	9061.25	0.000368185	0.0020148	19	6.01667	3944.82	5118.49	1.29752	1654	1748	2230	1064	15611	5600	9740	5294	590	1303	785	414	1349	2461	1682	1668	3324.56
2414	unknown263	0.0210199	0.0421957	18	9	3342.14	0.165997	0.326604	20	6	20023.2	0.0232316	0.0460589	19	7.6	7935.01	9053.09	1.1409	709	44	3045	1295	9323	6069	32009	32692	769	1795	1788	3777	1138	1933	881	1219	6155.38
2415	unknown2630	0.00421867	0.0128369	24	0	1066.67	0.0682047	0.19902	21.8859	6.4e-05	7891.24	0.00263376	0.0082819	22.9429	3.36e-05	6596.73	1353.34	0.205153	7935	8554	7271	7805	7418	6295	6979	6703	4345	4884	5166	5805	8326	7105	5288	6500	6648.69
2416	unknown2631	0.000320124	0.00217263	24	3	1201.37	0.0418916	0.168276	21.4599	6.63e-05	7175.75	0.000163869	0.00116895	22.7299	1.42066	5956.73	1668.59	0.280119	7387	7545	7083	6688	6235	6579	5815	6942	3656	4988	4450	4585	7541	5689	5366	5550	6006.19
2417	unknown2632	0.0419656	0.0724237	18	6	1487.4	0.143664	0.297497	20	6.00001	6754.5	0.0368441	0.0682648	19	6.01667	5125.83	1617.07	0.315474	3887	5201	4291	4338	5662	6597	7387	7372	3043	4164	4086	4755	5547	5634	3597	3317	4929.88
2418	unknown2633	0.00267199	0.00936821	18	6	736.452	0.157877	0.316338	20	6	4455.75	0.00369995	0.0106885	19	6.01667	3784.15	574.799	0.151896	3541	4041	3836	3534	4586	4162	4572	4503	2225	2899	2909	3235	4542	4415	3020	3412	3714.5
2419	unknown2634	0.00164724	0.00666594	24	3	3038.79	0.030226	0.161456	20.6557	6.63e-05	13727.2	0.000543089	0.00264839	22.3279	1.39553	11492.2	3095.97	0.269398	13364	14100	15142	12303	13220	12689	13829	14199	6299	8958	8367	8878	12715	12740	9346	9807	11622.2
2421	unknown2636	0.0210199	0.0421957	18	6	4154.61	0.158794	0.317587	20	5.99998	24477.8	0.0223715	0.0448051	19	6.01666	20144.7	4194.5	0.208218	17728	18567	20654	17366	24121	23235	25463	25092	13418	17680	17139	18239	21611	22655	14314	16901	19636.4
2422	unknown2637	0.00980952	0.0239973	18	9	915.35	0.0287062	0.160845	20	5.99999	6641.25	0.00258364	0.00816554	19	7.6	4030.46	1972.94	0.489508	2408	2649	2350	1935	6806	6356	7211	6192	2539	3144	2830	2406	3483	2643	2394	2936	3642.62
2424	unknown2639	1.91e-05	0.00025515	24	0	1505.08	0.0262871	0.159895	24.4321	6.63e-05	6582.74	7.78e-06	0.000113831	24.2161	3.29e-05	5085.03	1795.88	0.353169	6520	6350	7387	6074	4654	4371	4323	4380	3037	4314	3739	3770	6551	5994	4529	5169	5072.62
2428	unknown2642	0.00164724	0.00666594	18	6	880.348	0.109538	0.254588	20	6.00001	3709.25	0.00173581	0.00611655	19	6.01667	2748.22	916.797	0.333596	2512	2534	2227	2435	3189	3410	4178	4060	1453	1901	1961	2020	3287	3050	2024	1953	2637.12
2429	unknown2643	0.0419656	0.0724237	24	3	1329.71	0.040411	0.167576	20	6.63e-05	4873.75	0.0125148	0.0279181	22	1.37504	3882.31	1867.33	0.480984	5897	5374	4282	3942	4701	4843	5393	4509	1906	2339	1848	1766	5529	3787	4528	3061	3981.56
2432	unknown2646	0.0210199	0.0421957	18	6	660.084	0.0691844	0.200112	20	6	3774	0.0109552	0.0247708	19	6.01667	3066.71	609.832	0.198855	3112	3178	3147	2772	3476	3668	3936	4016	1808	2554	2438	2639	3514	2994	2188	2445	2992.81
2433	unknown2647	0.0419656	0.0724237	18	6	270.468	0.960626	1	20	6	2743	0.169762	0.247665	19	6.01667	2613.09	133.326	0.0510224	2771	2617	2239	2360	2534	2876	2694	2868	2046	2157	2449	2306	3339	3247	2539	2509	2596.94
2434	unknown2648	1.91e-05	0.00025515	24	18	4200.57	0.0245899	0.159709	27.6489	17.9999	18886.2	7.31e-06	0.000108035	25.8245	18.0903	11252.3	5373.02	0.477503	9350	10118	8073	6782	6353	5886	6272	7634	9461	9379	9662	11280	23315	16472	16392	19366	10987.2
2435	unknown2649	7.77e-06	0.000124608	24	18	1118.64	0.0235636	0.159709	27.4766	17.9999	5314.74	3.02e-06	5.43e-05	25.7383	18.0825	3172.33	1568.65	0.494478	2482	2894	2365	2100	1829	1668	1607	2036	2723	2770	2718	3116	6551	4413	4589	5706	3097.94
2438	unknown2651	0.0299489	0.0559443	24	3	2533.56	0.0390895	0.167576	20	5.99999	7942.5	0.00907302	0.0212818	22	4.67499	5958	2254.25	0.378358	7339	7030	7952	5122	8340	8286	7882	7262	2833	3901	3245	4018	7047	3721	4037	6206	5888.81
2448	unknown2660	8.77e-05	0.00082364	24	0	1801.35	0.0273091	0.160845	25.8651	6.63e-05	7399.73	3.34e-05	0.000355954	24.9326	3.2e-05	5005.26	2187.66	0.437071	7645	7231	8020	6703	4314	4238	3269	3779	2674	3576	3633	3956	6205	4098	4694	5089	4945.25
2451	unknown2663	0.00267199	0.00936821	18	0	4779.33	0.189665	0.358312	26.8085	17.9999	9432.49	0.00435197	0.0120026	22.4043	18.7235	9548.99	3774.72	0.395301	14895	14351	16345	14724	9323	8305	3655	5567	6462	8662	7127	9751	12309	4855	10147	10419	9806.06
2453	unknown2665	0.0419656	0.0724237	18	6	807.162	0.400852	0.613256	20	6	3917.75	0.0855409	0.137503	19	6.01667	3123.51	730.925	0.234007	3145	2808	2628	3074	3026	3984	4784	3877	1973	2301	2103	2143	4076	4080	2581	1976	3034.94
2454	unknown2666	0.0065055	0.0176718	18	6	585.484	0.115334	0.260821	20	6.00001	3918	0.00614876	0.0155333	19	6.01667	3373.05	416.085	0.123356	3395	3444	3671	3455	3751	3845	3976	4100	1769	2724	2702	2642	3706	4237	2671	3074	3322.62
2467	unknown2678	0.0210199	0.0421957	24	0	804.334	0.418037	0.631358	20	5.17e-05	7902.5	0.0503893	0.0883343	22	2.85e-05	7190.07	1045.78	0.145447	9308	7968	7319	7015	6508	6914	6578	8555	5251	6947	6047	6398	9176	7880	7543	6946	7272.06
2471	unknown2681	0.00267199	0.00936821	24	3	759.786	0.0864407	0.224259	20	6.63e-05	4129.75	0.00216492	0.00716676	22	1.37504	3502.47	1111.73	0.317414	4399	4297	4311	3512	3993	4230	3457	3913	2055	2531	2361	2767	5103	3463	3182	3411	3561.56
2473	unknown2683	0.0299489	0.0559443	18	6	1874.54	0.834113	1	20	5.99999	8698.25	0.117151	0.179528	19	6.01666	6870.33	1880.11	0.273656	5415	5954	6490	5149	6802	8579	9826	9586	4020	4820	5615	5323	7889	11237	5444	4131	6642.5
2479	unknown2689	0.000572095	0.00320048	18	6	2929.37	0.398713	0.61026	20	6.00001	16640.8	0.0021409	0.00709807	19	6.01667	14312.9	2433.19	0.17	12300	14749	13503	10666	16732	16374	16984	16473	12128	11691	12102	12822	14109	15049	16287	12320	14018.1
2481	unknown2690	0.00267199	0.00936821	18	6	1497.65	0.0772602	0.210914	20	6	6755.75	0.00195818	0.00664744	19	6.01667	5425.43	1127.42	0.207802	5052	5690	6284	4627	6385	6445	6754	7439	3141	3648	3768	4485	5504	6552	4773	4074	5288.81
2483	unknown2692	0.0419656	0.0724237	24	3	688.015	0.319406	0.519155	21.0501	6.6e-05	5528.5	0.0712051	0.117634	22.5251	1.40785	4794.23	1083.93	0.226092	5632	5512	6280	4690	5331	4689	4324	5406	2933	3982	3954	4518	6167	5667	4002	4241	4833
2484	unknown2693	0.0144977	0.0319142	18	6	461.387	0.234443	0.416183	20	5.99997	3749	0.0227192	0.0452503	19	6.01665	3315.39	353.967	0.106765	3332	3473	3543	3023	3204	3808	3980	4004	2111	2724	2794	3062	3595	3845	2788	3074	3272.5
2492	unknown270	0.0419656	0.0724237	24	18	1509.32	0.351788	0.55776	20	12	5325.5	0.0769984	0.125955	22	14.85	4238.64	2485.03	0.586281	7276	3467	2397	3757	406	2982	3511	2333	3344	5265	7351	5342	5634	5613	4162	5348	4261.75
2495	unknown2702	0.0419656	0.0724237	18	3	1170.62	0.112909	0.258539	20.1831	6.63e-05	7693.75	0.0300981	0.0577169	19.0915	1.59099	6551.38	1217.94	0.185905	7816	7584	7904	7471	6713	6933	6892	7534	3949	4915	5740	6235	8243	8055	5891	6165	6752.5
2497	unknown2704	0.0499351	0.0858693	24	3	754.483	0.681862	0.905663	24.7059	6.63e-05	5298.99	0.149132	0.221676	24.3529	1.52209	4025.12	1531.13	0.380395	4229	6839	4112	6016	2846	4073	3399	4061	4096	2460	3030	2094	7835	3095	3047	3030	4016.38
2499	unknown2706	0.0359573	0.0669944	24	6	1249.99	0.0159204	0.159709	20	6	13095	0.00484616	0.0129688	22	6.05	8988.71	3755.64	0.417817	7738	7412	8012	7106	14038	12618	12814	12910	6487	7551	7106	7431	8147	7502	6231	6989	8755.75
2500	unknown2707	0.0210199	0.0421957	18	6	1843.6	0.0195639	0.159709	20	6	6473.75	0.00361733	0.0105192	19	6.01667	4615.86	1883.4	0.408028	3829	3623	3844	3602	6869	6199	6627	6200	3470	3516	3489	3880	4140	3810	3267	3837	4387.62
2503	unknown271	0.00980952	0.0239973	18	9	7076.02	0.133458	0.285187	20	6.00001	25585.8	0.00999986	0.0229288	19	7.60001	11976.6	11381.3	0.950295	5009	674	2833	1186	4402	33097	32747	32097	7727	10937	7396	1673	7191	1845	3514	3501	9739.31
2504	unknown2710	0.0299489	0.0559443	24	6	2366.33	0.0197079	0.159709	20	6	22745	0.0049786	0.0132173	22	6.05	13741.3	8399.82	0.611283	10869	10022	10096	9240	24443	22850	21558	22129	8549	10838	9962	9910	13071	9562	8817	9608	13220.2
2506	unknown2712	0.0210199	0.0421957	24	3	1067.55	0.308648	0.505655	22.3291	7.73e-05	9900.75	0.0391719	0.0716883	23.1646	1.44782	8872.05	1150.69	0.129698	9773	10036	10669	9125	9448	8856	9780	10524	5196	7941	7906	9531	9324	8791	6901	8481	8892.62
2507	unknown2713	0.0419656	0.0724237	24	6	583.363	0.0251343	0.159709	20	6	4153.75	0.00828467	0.0197645	22	6.05	2671.88	1346.13	0.503815	2267	2242	1930	1943	4018	4299	4447	3851	1877	2030	1881	2006	2809	2019	1870	1925	2588.38
2508	unknown2714	0.0299489	0.0559443	18	6	1669.83	0.0371499	0.166866	20	6	4710.5	0.00867946	0.0205142	19	6.01667	3110.98	1621.37	0.521178	2828	2402	2140	1929	4751	4656	5013	4422	2161	2115	2044	2107	3404	2531	2062	2067	2914.5
2509	unknown2715	0.0144977	0.0319142	18	6	1509.5	0.032742	0.16536	20	6.00001	4768	0.00410737	0.0115187	19	6.01667	3306	1458.59	0.441195	3019	2779	2391	2456	4767	4961	4857	4487	2272	2344	2275	2461	3602	2788	2335	2274	3129.25
2510	unknown2716	0.0144977	0.0319142	18	6	5632.46	0.0436127	0.168276	20	6	17759.5	0.0052898	0.013749	19	6.01667	12085	5732.27	0.474329	11051	9626	8265	8423	17518	18145	19151	16224	8430	8309	8174	8585	13704	9877	8383	8381	11390.4
2511	unknown2717	0.000987235	0.00460639	18	6	3830.57	0.0454309	0.170317	20	6.00001	11874.2	0.000493906	0.00248099	19	6.01667	8324.23	3548.82	0.426324	7892	7083	6003	5842	11494	12102	12615	11286	6124	6002	5422	5625	9447	6886	6076	6408	7894.19
2513	unknown2719	0.00980952	0.0239973	18	6	704.985	0.21011	0.386332	20	6.00001	2875	0.0148079	0.0321878	19	6.01667	2196.17	695.646	0.316754	2210	1843	1577	1633	2915	2858	3160	2567	1663	1673	1522	1714	2741	2288	1592	1834	2111.88
2524	unknown2729	0.0210199	0.0421957	18	6	1174.15	0.12658	0.276117	20	6	6136	0.0184364	0.0381595	19	6.01667	4971.76	1066.19	0.214448	4330	5337	4527	4736	5194	6179	6692	6479	3149	3695	4047	4417	5596	5304	4168	3631	4842.56
2527	unknown2731	1.91e-05	0.00025515	18	0	2172.59	0.0593568	0.188151	24.7059	17.9999	5306.99	1.66e-05	0.000208942	21.3529	18.455	4401.68	2076.83	0.471826	6499	7231	7788	5893	3401	2911	2002	2730	3077	3843	3465	4181	6770	3864	4876	5718	4640.56
2529	unknown2733	0.0299489	0.0559443	24	3	800.975	0.0975313	0.239269	20.2759	6	5195.5	0.0199672	0.0408399	22.1379	4.65913	4518.51	730.538	0.161677	4592	5460	5541	4255	4660	4960	5757	5405	2662	3517	3814	4309	4717	4275	4041	3994	4497.44
2530	unknown2734	0.00421867	0.0128369	24	3	507.703	0.221867	0.400952	24.0327	5.66e-05	5215.25	0.00746344	0.0182066	24.0163	1.50105	4577.47	761.481	0.166354	5318	5572	5392	4579	4573	4749	4454	4973	2884	4241	4094	4535	5120	4561	3858	4333	4577.25
2531	unknown2735	0.0210199	0.0421957	24	3	2046.01	0.228107	0.408142	22.5575	6.45e-05	17559	0.0304	0.0581414	23.2788	1.45496	15126.5	3207.71	0.212059	16479	18501	18924	16332	15156	14808	15433	17263	8882	12230	13554	14738	18266	16503	11830	13899	15174.9
2534	unknown2738	2.22e-07	7.82e-06	18	9	5883.48	0.026539	0.159895	20	6	17022.5	1.18e-07	4.28e-06	19	7.6	9911.58	6313.41	0.636973	4181	4514	4470	4493	13720	18263	15978	20129	6222	7990	7088	9891	5920	4952	4922	5995	8670.5
2535	unknown2739	0.000987235	0.00460639	18	6	2255.14	0.0550328	0.182739	20	6.00002	6104	0.000587878	0.00278807	19	6.01667	3858.52	2077.17	0.538332	3880	4115	2931	2455	6057	6748	4659	6952	1280	1980	1909	1961	3777	1987	2363	4655	3606.81
2536	unknown274	0.0419656	0.0724237	24	18	1023.54	0.410993	0.624202	20	17.9999	4565	0.0872742	0.139858	22	18.15	3561.14	1299.71	0.364971	7184	4306	2086	3307	591	2732	2450	2016	4425	3359	4780	3156	4926	3943	5655	3736	3665.75
2537	unknown2740	0.00267199	0.00936821	24	6	7447.96	0.0395585	0.167576	20	6.00001	29082	0.00107338	0.00425615	22	6.05001	13385.7	13223.2	0.987864	12157	7606	8549	13706	19116	25133	44748	27331	4397	6118	4592	4084	5433	3630	9777	4670	12565.4
2539	unknown2742	0.00421867	0.0128369	24	0	781.707	0.0750542	0.207497	22.9091	5.75e-05	4571.5	0.00286796	0.00881352	23.4545	2.94e-05	3756.74	1003.83	0.267209	4879	4635	4620	4152	3463	3629	3654	3797	2207	2991	2815	3312	4999	4524	3200	3534	3775.69
2540	unknown2743	0.0065055	0.0176718	18	0	1596.65	0.168205	0.329077	25.8651	17.9999	4760.24	0.00855456	0.0202855	21.9326	18.5979	4520.04	1493.06	0.330319	7846	6941	6195	5406	3944	4042	2716	3486	2669	4396	3684	4081	5563	2861	4466	6151	4652.94
2542	unknown2745	0.0065055	0.0176718	18	6	1339.26	0.173665	0.335701	20	6	6644	0.00879616	0.0207109	19	6.01667	5390.74	1119.09	0.207595	5251	5049	5586	4865	6194	6680	6932	6770	2920	3952	4181	4438	6351	6722	3953	4238	5255.12
2543	unknown2746	0.00421867	0.0128369	18	6	1353.23	0.0850004	0.221852	20	6	8933.5	0.00320339	0.0095638	19	6.01667	7640.2	1109.53	0.145222	7986	7513	7935	6969	8667	8809	8834	9424	4648	6813	6396	6720	8386	7752	6341	6899	7505.75
2546	unknown2749	8.88e-07	2.07e-05	18	9	3299.54	0.0556775	0.183256	20	6.00002	7251	8.81e-07	2.02e-05	19	7.60001	3387.97	3204.38	0.945809	556	858	707	659	5865	5562	6076	11501	1299	2403	1815	2143	1040	947	1160	1538	2758.06
2550	unknown2752	0.0065055	0.0176718	18	6	3283.98	0.120523	0.267566	20	5.99998	13729	0.00639091	0.0160701	19	6.01666	10464.2	3129.36	0.299055	9438	9118	9282	9577	12440	14069	14507	13900	5751	7988	7711	8794	12265	12008	6981	7530	10084.9
2551	unknown2753	0.00421867	0.0128369	18	6	1038.03	0.0841197	0.220795	20	5.99999	3945	0.0031739	0.00950414	19	6.01666	2947.83	962.518	0.326518	2694	2654	2283	2706	3738	4168	3873	4001	1768	2186	1984	2285	3572	3105	2129	2153	2831.19
2553	unknown2755	0.0210199	0.0421957	24	0	1778.37	0.253847	0.441251	24.9858	6.63e-05	8754.48	0.0332598	0.0628064	24.4929	3.25e-05	6949.16	1974.75	0.284172	9624	9464	8618	7312	7409	7079	3584	5789	4848	5919	5776	5781	9251	4934	6984	8332	6919
2558	unknown276	0.0210199	0.0421957	18	9	3696.4	0.0210574	0.159709	20	6	10146.5	0.00386092	0.0110058	19	7.6	4277.39	4338.7	1.01433	1349	1421	983	738	7041	12392	10495	10658	1563	1454	1402	905	1510	933	1066	882	3424.5
2568	unknown2769	0.00164724	0.00666594	24	3	2519.42	0.0555775	0.183256	21.5648	6.63e-05	16543.2	0.000942835	0.00387634	22.7824	1.42393	13557.2	4216.34	0.311004	16421	17320	17611	14821	14321	13986	14305	14596	7357	9940	11075	10956	17259	15224	11216	12405	13675.8
2570	unknown2770	0.0065055	0.0176718	18	6	1822.57	0.0358812	0.166866	20	6	10928.2	0.00218547	0.00719628	19	6.01667	9085.25	1584.4	0.174393	9284	9527	8459	8959	11066	11832	10422	10393	5895	7209	7592	8111	9694	7622	8352	7875	8893.25
2571	unknown2771	0.00164724	0.00666594	18	9	971.565	0.217803	0.395591	24.2975	6.00002	7504	0.00320487	0.0095638	21.1488	7.89842	6774.69	819.494	0.120964	5666	6010	5436	6126	7672	7002	8182	7160	5859	7163	6976	7882	6731	6339	6412	6139	6672.19
2572	unknown2772	0.0299489	0.0559443	18	6	654.251	0.223468	0.402837	20	5.99998	3935.5	0.0402009	0.0732925	19	6.01666	3325.64	486.993	0.146436	3153	3536	3613	3296	3313	3941	4260	4228	2045	2407	2549	2620	4237	4035	2727	2306	3266.62
2573	unknown2773	7.77e-06	0.000124608	18	9	7153.45	0.0441199	0.168276	20	6	31799	5.45e-06	8.57e-05	19	7.6	23094.3	7714.12	0.334027	16142	16438	15456	16839	27026	33259	29686	37225	17368	18985	20318	25128	17861	17226	16947	19342	21577.9
2577	unknown2777	0.0419656	0.0724237	18	6	1202.61	0.119067	0.266577	20	5.99998	10044	0.0314742	0.0597734	19	6.01666	8746.33	883.103	0.100968	9670	8728	10569	8792	9681	9476	10204	10815	4822	6805	7526	7994	9128	9676	6294	8049	8639.31
2580	unknown278	0.0065055	0.0176718	18	9	2970.91	0.138046	0.291154	20	6.00002	12913.8	0.00719818	0.017659	19	7.60001	5463.14	6212.92	1.13724	929	140	410	278	650	17943	17607	15455	4246	4130	2157	331	1920	553	578	542	4241.81
2581	unknown2780	0.00421867	0.0128369	18	6	4511.34	0.017982	0.159709	20	6	18214.8	0.000795515	0.00345494	19	6.01667	13447.6	4288.14	0.318879	12725	12963	13053	12393	17454	16629	19325	19451	7570	8662	9222	10686	13369	11215	10528	11602	12927.9
2584	unknown2783	0.0210199	0.0421957	24	3	644.881	0.154925	0.312014	21.1511	5.36e-05	4294.75	0.0219068	0.044113	22.5755	1.411	3797	640.93	0.168799	4535	4630	4390	3624	4477	4215	3869	4215	2574	3476	2904	3490	4479	3040	3298	3887	3818.94
2585	unknown2784	0.0299489	0.0559443	18	6	884.591	0.156694	0.314989	20	6	4327.5	0.0298545	0.0572751	19	6.01667	3469.25	738.608	0.212901	3425	3459	3634	3210	3815	3973	4880	4642	1880	2559	2676	2717	4265	4046	2519	2376	3379.75
2586	unknown2785	0.00164724	0.00666594	24	0	884.591	0.0884823	0.226168	24.0327	6.63e-05	5513.99	0.00143326	0.005272	24.0163	3.31e-05	4537.29	1134.63	0.250068	5486	5571	6129	4870	4584	4141	4179	4276	2763	3845	3569	4080	5858	5129	3814	4293	4536.69
2587	unknown2786	0.0210199	0.0421957	18	6	823.426	0.0867422	0.224772	20	5.99998	6237.75	0.0133231	0.0294182	19	6.01666	5432.75	553.454	0.101874	6023	5732	5940	5521	5799	6123	6563	6466	3185	4072	4218	4414	6305	6582	4360	4548	5365.69
2589	unknown2788	0.00267199	0.00936821	18	6	2050.08	0.0169403	0.159709	20	6	7627	0.000498044	0.00249547	19	6.01667	5610.96	1800.68	0.320922	5668	5794	5248	4774	7194	8209	7428	7677	3477	4019	3675	3711	5717	4635	4124	4934	5392.75
2590	unknown2789	0.0299489	0.0559443	24	3	635.689	0.463517	0.684525	26.6465	6.93e-05	6210.5	0.0732569	0.120563	25.3233	1.58274	5389.5	723.747	0.134288	6070	6395	6487	5890	5964	5710	4440	5740	3482	5316	4976	5299	6088	4529	3968	5692	5377.88
2592	unknown2790	0.000320124	0.00217263	24	0	1028.84	0.0559589	0.183562	25.5652	6.63e-05	4921.49	0.000213711	0.0014042	24.7826	3.21e-05	3459.04	1409.71	0.407544	5630	5095	5027	3934	2996	3018	2725	3020	1796	2789	2352	2529	3750	2396	3069	4690	3426
2593	unknown2791	0.0210199	0.0421957	24	0	1486.69	0.161385	0.320549	26.4865	6.63e-05	8920.24	0.0226817	0.0451964	25.2432	3.16e-05	6810.24	1781	0.261517	10018	9252	8369	8042	7175	7137	4613	6108	4035	6113	5547	5737	8213	4331	5710	7561	6747.56
2594	unknown2792	0.000572095	0.00320048	24	0	1410.68	0.062587	0.192017	25.4179	6.63e-05	7537.99	0.000402363	0.00216426	24.7089	3.22e-05	5808.01	1684.23	0.289984	7422	7246	8306	7178	5533	5132	3763	5331	3533	5076	4759	5178	7073	5134	5309	6378	5771.94
2597	unknown2795	0.00980952	0.0239973	18	9	216.021	0.188802	0.357618	25.1282	6	2990.25	0.0135042	0.0297423	21.5641	7.96552	2868.58	178.169	0.0621105	2612	2582	2684	2693	2905	2811	2995	3250	2944	2921	2851	3138	2670	2727	2896	2910	2849.31
2603	unknown280	0.0499351	0.0858693	18	9	1260.42	0.972793	1	20	6	384328	0.195502	0.280311	19	7.6	133525	183683	1.37565	66	29	307	148	1530967	570	3902	1871	66	367	208	19197	143	629	84	121	97417.2
2607	unknown2803	0.0065055	0.0176718	18	6	495.682	0.144325	0.29839	20	6	2378.5	0.00748381	0.01823	19	6.01667	1888.84	449.46	0.237955	1923	1798	1577	1821	1870	2403	2696	2545	1108	1427	1482	1492	2101	2151	1538	1418	1834.38
2608	unknown2804	0.000572095	0.00320048	24	0	1052.17	0.0305997	0.161456	26.1721	6.63e-05	5645.99	0.000209248	0.00137906	25.0861	3.18e-05	4032.88	1389.53	0.344551	6040	5594	5495	5455	3588	3277	3160	3188	2396	3428	3040	3361	4319	3416	3467	4605	3989.31
2611	unknown2807	0.00980952	0.0239973	18	6	1470.25	0.0366495	0.166866	20	6	4921.5	0.00321073	0.0095747	19	6.01667	3519.84	1243.71	0.353343	3759	3961	3115	2677	5207	5214	4253	5012	1729	2196	2392	2410	3358	2353	2378	3892	3369.12
2612	unknown2808	0.000171384	0.00137171	24	3	728.143	0.0327601	0.16536	24.8451	7.8e-05	4861.49	7.35e-05	0.000641603	24.4225	1.52645	3918.1	1075.88	0.274592	5185	4991	4655	4615	3991	4224	3608	4047	2380	3412	3211	3196	4394	3318	3405	3942	3910.88
2613	unknown2809	0.000987235	0.00460639	24	0	961.488	0.0394314	0.167576	25.5652	6.63e-05	5454.74	0.000434196	0.00225698	24.7826	3.21e-05	4123.8	1252.46	0.303714	5675	5425	5841	4878	3693	3416	3218	3614	2489	3723	3115	3649	4747	3825	3616	4587	4094.44
2614	unknown281	0.0144977	0.0319142	18	9	2036.47	0.015998	0.159709	20	6	10998.5	0.00217301	0.00718255	19	7.6	4826.1	4597.91	0.952717	1749	1984	1171	914	9475	12317	11253	10949	1964	1885	1825	1430	1978	1285	1360	1217	3922.25
2615	unknown2810	0.00267199	0.00936821	18	6	953.533	0.126971	0.276412	20	5.99999	4280.75	0.00304956	0.00927941	19	6.01666	3363.63	880.47	0.261762	3161	2614	3163	3264	4027	4342	4222	4532	1993	2574	2584	3135	3433	3995	2362	2710	3256.94
2617	unknown2812	0.0210199	0.0421957	18	6	1203.85	0.158386	0.317066	20	6.00001	6420.75	0.0223227	0.044728	19	6.01667	5280.38	913.99	0.173092	5318	5117	5570	5703	6191	5848	6817	6827	2547	3784	4283	4132	6272	6647	3550	4108	5169.62
2619	unknown2814	0.0419656	0.0724237	24	0	821.835	0.246822	0.432689	21.7778	5.78e-05	5762.5	0.0576942	0.0987025	22.8889	3.04e-05	4784.99	1085.29	0.22681	6800	6270	4782	5198	5584	4708	4132	5123	2462	4049	3780	4158	6451	4430	3933	5404	4829
2620	unknown2815	0.0299489	0.0559443	24	0	857.013	0.109398	0.254546	24.1644	6.63e-05	4773.49	0.0220204	0.0442695	24.0822	3.3e-05	3984.29	997.788	0.250431	4570	4700	5008	4816	3612	3440	3391	3932	2472	3285	3627	3582	5270	4861	3399	3741	3981.62
2621	unknown2816	0.00980952	0.0239973	24	0	1801.35	0.0998173	0.242678	25.2722	6.63e-05	8065.23	0.00776358	0.0187486	24.6361	3.23e-05	6000.8	2037.17	0.339483	8593	8279	8101	7288	5713	5230	3243	5159	3400	5069	4759	5361	7982	4696	5293	7215	5961.31
2629	unknown2823	0.0419656	0.0724237	18	6	968.383	0.0881653	0.22571	20	5.99998	4960.5	0.0244173	0.0480765	19	6.01665	3944.36	974.182	0.246981	3557	3841	3754	3317	5124	4662	4926	5130	2510	2898	3483	3753	4521	3636	2814	3295	3826.31
2630	unknown2824	0.0210199	0.0421957	18	6	705.869	0.182824	0.349659	20	6.00001	3674.25	0.0252155	0.0494488	19	6.01667	2930.47	700.185	0.238932	2736	2880	2662	2620	3522	3848	3489	3838	1791	2286	2457	2603	3809	2870	2037	2082	2845.62
2631	unknown2825	0.0065055	0.0176718	18	6	1446.74	0.113211	0.258682	20	5.99999	9847.5	0.00604926	0.0153177	19	6.01666	7988.32	1713.44	0.214493	7606	7648	8062	7140	11540	9465	8712	9673	4691	6752	6805	7536	7891	6982	5631	8357	7780.69
2633	unknown2827	0.000987235	0.00460639	18	6	4021.32	0.0209531	0.159709	20	6.00001	13840.8	0.000243803	0.00153139	19	6.01667	10004.5	3522.18	0.352059	9716	10413	9287	7538	14703	13224	14253	13183	5830	7105	6671	6674	10081	8316	7664	8585	9577.69
2635	unknown2829	0.0144977	0.0319142	18	6	924.012	0.289108	0.483895	20	6	5350.25	0.0271382	0.0527416	19	6.01667	4475.33	769.144	0.171863	4054	4325	4557	4574	4629	5459	5715	5598	2842	3341	3695	3821	5413	5502	3357	3232	4382.12
2636	unknown283	0.000320124	0.00217263	18	9	93152.5	0.0429615	0.168276	20	6	334894	0.000167708	0.00118656	19	7.6	125064	160647	1.28452	900	29	11291	3436	443138	132202	413275	350959	3781	20232	15628	70099	5318	18904	2922	3634	93484.2
2638	unknown2831	0.00267199	0.00936821	24	3	705.869	0.112793	0.258539	21.6708	6.63e-05	5784	0.00274473	0.00853785	22.8354	1.42725	4998.2	1050.78	0.210231	5923	5756	5925	5532	5119	4956	5455	5743	3054	3849	4433	4732	5575	5590	3846	4931	5026.19
2639	unknown2832	0.0419656	0.0724237	24	0	1493.59	0.334592	0.537981	20.9501	4.38e-05	14280	0.0739382	0.1215	22.4751	2.35e-05	12681.6	2098.34	0.165463	14209	15451	13533	13927	12281	12982	11816	13155	7603	9836	11130	13943	16368	12487	12155	13965	12802.6
2640	unknown2833	0.0419656	0.0724237	18	6	1052.71	0.409609	0.623192	20	6	10879.2	0.0870381	0.139583	19	6.01667	9781	944.366	0.0965511	9630	9352	10383	9577	10238	11276	10758	11245	6763	8875	8485	9810	11050	10616	7615	8992	9666.56
2641	unknown2834	0.00421867	0.0128369	18	6	683.419	0.0361494	0.166866	20	6	3452	0.00149274	0.00542701	19	6.01667	2852.91	485.613	0.170217	3006	2998	2931	2789	3420	3411	3492	3485	1815	2070	2295	2386	3259	2803	2129	2416	2794.06
2642	unknown2835	0.00980952	0.0239973	18	9	2091.98	0.33228	0.534661	20	6	7662.75	0.0219241	0.044113	19	7.6	5507.92	2041.4	0.37063	2840	3410	2968	3205	5547	8259	8699	8146	4830	4698	5106	5073	6685	6606	3211	2423	5106.62
2643	unknown2836	0.0144977	0.0319142	18	0	461.741	0.335106	0.538408	24.8451	17.9999	4059	0.0307386	0.0586336	21.4225	18.4714	3912.47	415.832	0.106284	4251	4181	4669	4585	3147	3593	3862	3615	3513	3937	3894	3861	4081	4685	3846	3624	3959
2646	unknown2839	0.0419656	0.0724237	24	0	583.717	0.253584	0.441001	24.2975	6.63e-05	5095.5	0.0589871	0.100517	24.1488	3.3e-05	4419.72	738.19	0.167022	5121	5461	5181	4619	3973	4057	4683	4469	3010	3870	3879	4301	5082	5350	3957	3646	4416.19
2647	unknown284	4.22e-05	0.000465917	18	9	16788.1	0.0255924	0.159709	20	6	41226.8	1.59e-05	0.000202627	19	7.6	19780.7	18814.7	0.951164	6290	674	5185	3439	53538	34637	37343	39389	14571	17858	13718	6526	8677	4538	5554	5378	16082.2
2650	unknown2842	0.00164724	0.00666594	24	3	660.084	0.0385389	0.167576	21.1511	5.06e-05	4040	0.000677028	0.00308606	22.5755	1.411	3490.54	714.754	0.204769	4154	3987	4175	3844	3758	4167	3769	3992	2168	2931	2980	2845	3980	3420	2815	3255	3515
2651	unknown2843	0.0210199	0.0421957	18	0	733.977	0.477849	0.699962	23.7736	17.9999	5305	0.0562558	0.0968154	20.8868	18.3505	5003.12	582.941	0.116516	5968	5730	5500	5468	4348	4363	4558	4651	3966	5161	4674	5712	6203	5331	4428	5258	5082.44
2654	unknown2846	0.000572095	0.00320048	24	0	698.445	0.0343071	0.166163	23.2718	7.87e-05	4652.24	0.000232355	0.00148392	23.6359	4e-05	3895.12	904.107	0.232113	4636	4487	4562	4924	3693	3993	3576	3812	2700	3200	3164	3231	4931	4236	3585	3771	3906.31
2655	unknown2847	0.0065055	0.0176718	24	3	919.592	0.0705936	0.201231	25.2722	6.54e-05	5836.74	0.00398898	0.0112596	24.6361	1.53979	4645.23	1289.88	0.277678	5735	5694	6237	5681	4989	4963	3779	4556	2692	3852	4025	3936	5482	3589	4012	4905	4632.94
2656	unknown2848	0.0299489	0.0559443	18	6	327.921	0.304808	0.501626	20	6	3382	0.052	0.0905654	19	6.01667	3109.83	193.586	0.0622496	3269	3393	3297	2874	3089	3423	3442	3574	2238	2663	2580	2872	3809	3401	2697	2761	3086.38
2657	unknown2849	0.0065055	0.0176718	24	3	694.025	0.101277	0.243898	22.4427	6.37e-05	4836.5	0.00548498	0.0141369	23.2214	1.45137	4102.7	970.981	0.236669	4936	5089	4807	4514	4646	4845	3370	4160	2558	3391	3336	3769	4672	3615	3846	4345	4118.69
2661	unknown2852	0.00815751	0.0220763	18	6	1041.21	0.0639651	0.194092	20	6	5397	0.00446565	0.0122304	19	6.01667	4316.68	1058.8	0.245281	3712	3719	4027	4094	5074	5610	5448	5456	3004	3377	3712	3842	4684	4349	3457	3449	4188.38
2662	unknown2853	0.00421867	0.0128369	18	6	1155.41	0.170648	0.332347	20	6	8529	0.00592944	0.0151115	19	6.01667	7258.31	1154.75	0.159094	6866	7329	6825	6965	8512	8781	8398	8425	4666	5803	5872	6890	8316	8113	5808	6325	7118.38
2665	unknown2856	0.0065055	0.0176718	24	6	488.257	0.122489	0.271155	20	6	3742.75	0.00648228	0.0162432	22	6.05	3110.41	469.162	0.150836	2914	3039	3421	3107	3697	3616	4171	3487	2340	2620	2805	2911	3267	3403	2249	2254	3081.31
2666	unknown2857	0.0065055	0.0176718	18	6	788.424	0.122822	0.271216	20	6	4943.25	0.00649772	0.0162674	19	6.01667	4142.25	722.601	0.174446	3919	4197	3957	3992	4645	5223	4783	5122	2967	3177	3537	3745	4546	4694	3134	3237	4054.69
2667	unknown2858	0.0210199	0.0421957	18	6	1714.73	0.0304521	0.161456	20	6	4922	0.00534731	0.0138646	19	6.01667	3117.43	1788.64	0.573753	2625	2538	2433	1935	5382	5233	4690	4383	1397	2147	2235	2413	2990	1591	1599	2820	2900.69
2669	unknown286	8.77e-05	0.00082364	18	9	236178	0.0712533	0.202445	20	6.00002	771166	8.11e-05	0.00068874	19	7.60001	312205	378975	1.21387	19229	946	10786	3372	186241	1049621	952196	896605	192969	221939	115339	20967	64739	18339	28994	21024	237707
2671	unknown2861	0.0419656	0.0724237	24	3	512.652	0.16099	0.320058	20.2759	5.36e-05	3686	0.0405181	0.0738087	22.1379	1.38365	3286.09	595.27	0.181148	3853	4210	3466	3215	3549	3860	3323	3664	2326	2820	2491	3017	4059	2935	2850	3400	3314.88
2674	unknown2864	0.0144977	0.0319142	18	6	759.079	0.0239088	0.159709	20	6	6688.5	0.00310827	0.00936831	19	6.01667	5852.06	535.311	0.091474	6205	6517	6474	6409	6699	6905	6507	6643	4044	4411	4454	5033	6445	5886	4665	5298	5787.19
2678	unknown2868	0.000987235	0.00460639	24	3	765.973	0.0527692	0.180625	24.0327	6.63e-05	4334	0.000565885	0.00271049	24.0163	1.50105	3674.5	645.668	0.175716	4089	4632	4282	4333	4041	3993	3759	4641	2272	3099	3531	3155	3522	3597	2689	3154	3674.31
2680	unknown287	0.000171384	0.00137171	18	9	3802.11	0.0980346	0.23996	20	6	46622.8	0.000201519	0.00134147	19	7.6	16598.1	22495.6	1.35531	44	5	20	8	3256	69666	59588	53981	3097	3573	1076	40	323	12	75	52	12176
2684	unknown2873	0.00421867	0.0128369	24	3	563.211	0.0843326	0.221012	22.1053	6.42e-05	4312.25	0.00318103	0.00951263	23.0526	1.44082	3722.61	802.149	0.21548	4070	4352	4537	4290	3624	3745	4224	3777	2617	3130	3224	3141	4441	4181	3192	3283	3739.25
2686	unknown2875	0.00421867	0.0128369	24	0	1144.1	0.0614662	0.190242	23.7736	7.49e-05	7503.24	0.00240052	0.00773959	23.8868	3.76e-05	6244.6	1438.89	0.230421	6822	8090	7794	7307	6096	5978	6424	5539	4111	5277	4895	5560	7440	7389	5402	5876	6250
2689	unknown2878	0.000987235	0.00460639	24	3	936.386	0.0527027	0.18054	23.9024	6.63e-05	6336.75	0.000565238	0.00271039	23.9512	1.49698	5423.2	981.016	0.180892	5880	6560	6670	6237	6197	6075	5618	5536	3620	4588	4860	4918	5915	4845	4266	5000	5424.06
2691	unknown288	0.00421867	0.0128369	18	9	8618.22	0.0207216	0.159709	20	5.99999	24586	0.000904318	0.00378328	19	7.59999	10980.9	10932.6	0.995609	3370	4090	1820	805	19241	28790	23674	26639	6697	7982	4888	2071	4985	1111	2894	2251	8831.75
2692	unknown2880	0.0144977	0.0319142	24	0	573.817	0.159868	0.319	21.6708	4.8e-05	5119.25	0.0163798	0.0348694	22.8354	2.53e-05	4498.46	741.414	0.164815	4857	5146	5478	4996	4596	4447	4727	4210	3142	3890	3823	4134	5543	5403	3935	4155	4530.12
2693	unknown2881	0.00267199	0.00936821	18	6	2111.77	0.0314096	0.162489	20	6	9075	0.000871622	0.00368567	19	6.01667	7081.24	1795.76	0.253595	6328	7608	6866	6315	8839	9078	9075	9308	4235	5286	5393	5628	7391	7181	5300	5987	6863.62
2694	unknown2882	0.00421867	0.0128369	18	9	383.252	0.106234	0.250678	23.6461	6	3748.75	0.00390369	0.0110691	20.8231	7.8476	3418.47	408.4	0.119469	2822	3145	3370	2783	4056	3438	3849	3652	3582	3874	3285	3487	3330	3033	2867	3222	3362.19
2695	unknown2883	0.000572095	0.00320048	18	0	691.55	0.119702	0.26712	20	17.9999	3162.5	0.000725142	0.00324032	19	18.05	2847.14	558.251	0.196074	3514	4013	3543	3195	2104	2074	2377	2158	2537	3197	2929	3204	3467	3396	2970	2817	2968.44
2698	unknown2886	0.00344533	0.0120018	18	6	651.422	0.0548352	0.182256	20	6	4312.25	0.0018088	0.00628076	19	6.01667	3634.67	590.393	0.162434	3547	3877	3513	3435	4227	3982	4693	4347	2503	3058	2974	3140	3982	3619	2975	3138	3563.12
2699	unknown2887	0.0299489	0.0559443	18	6	726.552	0.288136	0.483006	20	6	5426.25	0.0496412	0.0871639	19	6.01667	4664.01	711.305	0.152509	4302	4414	4504	4675	4914	5860	5523	5408	3693	4214	3878	4194	5306	5308	3506	3546	4577.81
2702	unknown289	0.000987235	0.00460639	18	9	24998.3	0.0422181	0.168276	20	6	63455	0.000462035	0.00236196	19	7.6	31546.7	29053.6	0.920969	9551	10511	6531	4055	31261	76280	70888	75391	27989	32313	23499	10133	13951	5086	8431	7497	25835.4
2703	unknown2890	0.00267199	0.00936821	18	0	1291.71	0.115686	0.261305	20	17.9999	6817	0.0028073	0.00865133	19	18.05	5864.98	1193.83	0.203553	7072	7878	7151	6450	4279	3682	5058	4697	5114	6234	5999	7108	7773	7619	6315	5561	6124.38
2705	unknown2892	0.000987235	0.00460639	18	0	800.622	0.102269	0.245316	20	18	4080.5	0.00102991	0.00411773	19	18.05	3381.2	809.986	0.239556	4279	4745	4053	3795	2568	2244	2820	2663	3125	3293	3422	3586	4380	5157	3595	3190	3557.19
2706	unknown2893	0.00421867	0.0128369	24	21	612.354	0.126095	0.275327	21.4599	17.9999	3191	0.00454234	0.0124039	22.7299	19.477	2704.68	609.499	0.225349	3250	3523	3173	2572	1933	1737	2370	2208	2248	2722	2387	2948	3425	3842	2949	2548	2739.69
2711	unknown2898	0.0065055	0.0176718	18	6	604.4	0.14592	0.300586	20	5.99999	2910.5	0.00755608	0.0183602	19	6.01666	2355.09	535.611	0.227427	2087	2713	2058	1758	2660	2852	3200	2930	1491	1847	2123	1964	2432	2430	2009	2089	2290.19
2715	unknown2900	0.0419656	0.0724237	24	18	3139.55	0.264921	0.455022	21.253	17.9999	38468	0.0611381	0.103248	22.6265	18.0665	35137.3	3741.4	0.106479	37503	41699	34357	31627	32962	28362	30896	31596	30507	38246	35270	38411	39725	39511	39101	35535	35331.8
2719	unknown2904	0.00421867	0.0128369	24	21	341.533	0.112756	0.258539	20	17.9999	3196.5	0.00411501	0.0115252	22	19.525	2872.13	322.129	0.112157	3073	3669	2999	2512	2435	2309	2452	2400	2747	3021	2855	3172	3329	3212	3201	3044	2901.88
2724	unknown2909	0.0299489	0.0559443	24	18	3140.97	0.161692	0.320865	22.4427	17.9999	25538.2	0.0306547	0.0585074	23.2214	18.0202	21960.8	3673.15	0.167259	22768	26897	20563	19205	18723	15619	18243	18959	18240	23261	21794	26576	25381	27562	26621	22589	22062.6
2725	unknown291	0.00980952	0.0239973	18	9	4669.38	0.212907	0.389805	20	6.00002	9558.5	0.0149774	0.0324423	19	7.60001	5572.54	4560.74	0.81843	1227	2063	585	237	1005	12943	11731	12555	8806	6479	4919	3116	3400	1412	3296	1042	4676
2726	unknown2910	0.0065055	0.0176718	24	18	2985.05	0.149815	0.304841	22.4427	17.9999	22335	0.00773214	0.0186973	23.2214	18.0202	19187.3	2873	0.149734	20714	22235	16530	16410	16450	13508	16115	16375	17253	20140	20614	22586	21538	25057	23900	18845	19266.9
2728	unknown2912	0.0419656	0.0724237	24	21	1555.99	0.285405	0.48011	24.9858	17.9999	14954.5	0.0649732	0.108918	24.4929	19.5381	12963.7	1805.25	0.139255	12788	16162	12523	11379	11827	10741	10870	11698	10035	11935	12904	14145	16319	15217	15738	12544	12926.6
2730	unknown2914	0.00421867	0.0128369	24	18	1423.94	0.0618187	0.190828	23.0287	17.9999	9620.49	0.0024128	0.00776759	23.5144	18.0076	7999.24	1486.27	0.185801	8041	9100	7187	7086	6123	5806	6637	6400	6892	8631	8815	9186	8764	10927	10241	8550	8024.12
2732	unknown2916	0.00267199	0.00936821	24	21	971.388	0.187975	0.356617	20.0911	17.9999	5748.75	0.00431768	0.011969	22.0456	19.5204	4863.05	936.76	0.192628	5498	7275	4795	4366	3734	2964	3858	4127	4617	4709	4350	5872	5555	6192	6145	5103	4947.5
2736	unknown292	0.00164724	0.00666594	18	9	19993.1	0.0444986	0.168721	20	5.99999	48580	0.000771185	0.00339178	19	7.6	19672.9	22901.5	1.16412	2889	3156	1482	380	31297	72418	57432	33173	6707	11397	9592	1629	4242	1825	3032	2084	15170.9
2743	unknown2926	0.0065055	0.0176718	18	6	2647.05	0.0128768	0.159709	20	6	11403.8	0.000870153	0.00368305	19	6.01667	8692.72	2289.18	0.263345	9012	9083	9153	7838	11576	11734	11355	10950	6064	5623	5696	5674	8928	7059	6981	7919	8415.31
2744	unknown2927	0.000572095	0.00320048	18	9	9330.27	0.0265555	0.159895	20	5.99998	52941.5	0.000183746	0.00125691	19	7.59999	33813.5	15264.2	0.451423	20196	20918	22128	19146	48358	56065	55493	51850	20862	24943	26664	29554	28581	21664	24068	22517	30812.9
2745	unknown2928	0.000987235	0.00460639	18	9	3034.73	0.0507736	0.178885	20	6	13463.8	0.000546417	0.00265841	19	7.6	9381.56	3565.06	0.380007	6022	6049	5693	5659	13324	13071	14297	13163	5616	8116	8265	9940	8610	6629	7408	7030	8680.75
[truncated: 691 more rows]

## Sheet: unique cycling TS in AS
ID	CycID	JTK_pvalue	JTK_BH.Q	JTK_period	JTK_adjphase	JTK_amplitude	LS_pvalue	LS_BH.Q	LS_period	LS_adjphase	LS_amplitude	meta2d_pvalue	meta2d_BH.Q	meta2d_period	meta2d_phase	meta2d_Base	meta2d_AMP	meta2d_rAMP	X0	X0.1	X0.2	X0.3	X6	X6.1	X6.2	X6.3	X12	X12.1	X12.2	X12.3	X18	X18.1	X18.2	X18.3	AS
[truncated: 1,766 more rows]

[truncated: 5 more sheets: shared cycling in AS and TS, 0.5 cycling in AS, 0.5 cycling in TS, total AS, total TS]
