# Supplementary material for: The microbiome interacts with the circadian clock and dietary composition to regulate metabolite cycling in the Drosophila gut
Source: eLife journal article supplement (doi:10.7554/elife.97130), 2024-05-01
Supplement: supp1 [file Table4-Primary metabolites-TM versus TS.xlsx]

## Sheet: unique cycling in TM
ID	CycID	JTK_pvalue	JTK_BH.Q	JTK_period	JTK_adjphase	JTK_amplitude	LS_pvalue	LS_BH.Q	LS_period	LS_adjphase	LS_amplitude	meta2d_pvalue	meta2d_BH.Q	meta2d_period	meta2d_phase	meta2d_Base	meta2d_AMP	meta2d_rAMP	X0	X0.1	X0.2	X0.3	X6	X6.1	X6.2	X6.3	X12	X12.1	X12.2	X12.3	X18	X18.1	X18.2	X18.3	TM
9	1684	0.0299489	0.066265	24	9	745.291	0.0922085	0.318573	24.0327	6	1749	0.0190325	0.049673	24.0163	7.50102	1227.73	744.146	0.606116	688	583	980	591	1766	1692	1282	2256	890	1586	2063	2284	570	790	348	1283	1228.25
10	1702	0.00421867	0.0149426	24	12	28678.7	0.42418	0.82966	24.4321	12	123611	0.0131094	0.0374617	24.2161	12.001	90980.8	41973.8	0.461348	60171	51784	57873	52489	166765	81499	87416	88679	92399	185413	107215	109417	137721	75335	53553	52734	91278.9
11	1704	0.0065055	0.0205398	18	6	1428.71	0.0824486	0.298914	20	6	4043	0.0045756	0.0163047	19	6.01667	2797.58	1023.38	0.365809	2047	2960	2483	4084	3299	4116	4254	4503	749	1391	1156	1532	2854	2831	3524	994	2673.56
12	1708	0.0299489	0.066265	18	9	13911.3	0.544415	0.958125	25.2722	6	47687.2	0.0834195	0.168089	21.6361	7.97739	39788.7	12559.4	0.315652	20708	29887	18561	24586	71557	36260	40765	42167	41316	72399	35749	39998	54702	39247	25733	21854	38468.1
13	1713	0.0299489	0.066265	18	9	20023.1	0.404359	0.807759	24.4321	6	89893.5	0.0655607	0.139213	21.2161	7.90912	75796.5	19641.4	0.259133	63801	55164	46121	49874	130628	74176	79760	75010	78453	111213	81796	68944	85681	68772	54621	50270	73392.8
17	1735	0.0144977	0.0373749	24	12	29987.7	0.802964	1	25.2722	12	168438	0.0634816	0.135481	24.6361	12.008	138920	43798.5	0.315278	98646	97560	88215	94225	273057	117895	125286	142802	137115	250711	143787	142138	210213	120014	92317	103501	139843
23	1771	0.0419656	0.0867083	24	0	717.36	0.557141	0.972402	22.5575	4.69e-05	4946.75	0.111195	0.215489	23.2788	2.42e-05	4100.66	1222	0.298	3773	3981	4417	7616	3416	3321	4679	3963	3463	1850	3275	3622	4300	3768	5007	5656	4131.69
27	1830	0.0210199	0.0507729	18	9	12197.6	0.604407	1	23.9024	6	65905.5	0.06817	0.143668	20.9512	7.8674	53765.6	15073.1	0.280348	39352	37638	33722	41162	103940	47909	53885	57888	51496	82222	54304	47791	60587	47071	39457	29784	51763
30	1967	0.0210199	0.0507729	24	15	8264.84	0.137188	0.407215	20.7529	12	47855	0.0197493	0.0509134	22.3765	13.462	37637.6	12187.7	0.323819	36174	34174	25734	26956	38652	28785	32205	30018	45802	55902	50861	38855	42638	47685	30998	32148	37349.2
43	2153	0.0065055	0.0205398	24	12	11753.5	0.10924	0.351928	23.9024	12	61481	0.00586248	0.0198477	23.9512	12.0001	51153.3	14380.8	0.281131	42336	38588	38539	45163	68705	50857	56643	52274	51717	60553	74131	59523	43096	56509	42438	37014	51130.4
45	2193	0.00131724	0.00623838	18	9	645.588	0.0254615	0.211033	20	5.99999	2719.75	0.000379083	0.00204851	19	7.59999	1624.42	868.841	0.534863	734	941	936	1034	2473	2360	3086	2960	1107	1177	1169	1144	1107	882	855	1293	1453.62
53	2568	0.00980952	0.0282233	24	12	2132.28	0.34989	0.739263	25.7143	12	6262.25	0.0229087	0.0568002	24.8571	12.0143	4485.17	2319.38	0.517121	2785	1990	2232	825	9328	4442	5020	3419	4991	8066	6155	5837	8013	4607	2658	2450	4551.12
62	3026	0.0144977	0.0373749	24	12	3716.2	0.447018	0.858396	23.7736	12	15861.5	0.0391367	0.0891682	23.8868	12.0003	10524.8	6898.82	0.655482	7389	6482	972	7219	24461	9398	10094	7038	12048	26328	12916	12154	11724	5286	7315	7165	10499.3
66	3122	0.0065055	0.0205398	24	12	27605.4	0.26489	0.634756	20	6.00001	117458	0.0126892	0.0363842	22	8.8	80045	34286.5	0.42834	40348	59344	50776	50429	79215	83985	203930	102703	84965	84987	93098	84495	44344	44652	62446	59960	76854.8
71	4219	8.77e-05	0.000697384	18	9	6706.91	0.0433634	0.223696	20	5.99999	15476	5.13e-05	0.000417607	19	7.6	9450.58	7244.35	0.766551	2341	1784	1808	1451	11948	17561	18636	13759	9845	8511	12690	10084	5721	8743	1646	1896	8026.5
77	4541	0.0065055	0.0205398	18	9	2809.87	0.367107	0.762377	20	6	8293.75	0.0168063	0.0457024	19	7.6	5498.34	2787.82	0.507029	3375	2355	2243	1985	3946	8253	12769	8207	5954	2645	6798	4639	2195	4940	5525	3376	4950.31
86	4818	0.000572095	0.00305238	24	12	14820.1	0.0670534	0.274912	24.7059	12	77444	0.000428433	0.00228588	24.3529	12.0025	64014.1	17790.4	0.277914	52864	40903	50068	49397	85659	63598	72604	63637	71394	79875	89346	69161	61889	70518	51125	55499	64221.1
91	4929	0.00980952	0.0282233	18	9	2375.53	0.866206	1	20	5.99999	20712.5	0.0490114	0.109015	19	7.6	16770.2	4288.93	0.255747	13105	9631	11775	14657	35211	16297	16248	15094	14878	22438	14814	14452	19045	13836	10121	13232	15927.1
95	7490	0.0065055	0.0205398	18	0	43976.9	0.200468	0.533106	25.1282	17.9999	60562.6	0.00996654	0.0298996	21.5641	18.5055	45428.7	40996.2	0.902428	76449	129480	85736	92008	10110	20579	18688	13490	20759	14335	33396	38791	13623	23158	121302	84168	49754.5
96	7826	0.0210199	0.0507729	24	15	728.85	0.234094	0.589079	23.52	12	4287	0.0310704	0.0727565	23.76	13.4862	3237.49	1299.57	0.401414	2500	2420	1574	2463	3745	2956	2593	3271	4722	5058	5198	2170	3112	3912	3276	2743	3232.06
100	11481	0.0210199	0.0507729	24	21	631.446	0.278625	0.650639	20	17.9999	3695	0.0359609	0.0828279	22	19.525	3175.3	597.784	0.18826	3680	3190	3822	3792	2216	2246	2290	2907	3657	3000	2632	3476	4543	3410	2477	4350	3230.5
106	14806	0.0065055	0.0205398	18	6	2259.03	0.0550762	0.245657	20	6	5214	0.00320109	0.0121555	19	6.01667	2912.43	2352.33	0.807686	1528	1671	1798	1821	6038	5331	5049	4438	1265	1802	1343	1236	3804	1573	1636	1705	2627.38
111	16747	4.22e-05	0.000390745	18	9	4960	0.0440525	0.223696	20	5.99999	11776.2	2.64e-05	0.000244359	19	7.6	8182.33	4314.84	0.527336	3171	3186	4318	4480	12417	10612	11801	12275	5061	7903	10562	11271	5433	4850	3902	6104	7334.12
124	17537	0.0419656	0.0867083	18	9	388.202	0.310642	0.702017	20	6	2132	0.069614	0.146346	19	7.6	1701.35	399.208	0.234642	1571	1134	1115	1364	2537	1760	2383	1848	1683	1979	1454	1230	1850	1260	1287	1511	1622.88
130	18266	0.00421867	0.0149426	24	9	425.325	0.111416	0.35368	24.8451	6.00002	2197.25	0.0040717	0.0149237	24.4225	7.52821	1766.57	451.886	0.255798	1827	1223	1655	2072	1909	2415	2374	2091	1859	1788	1654	2468	1558	1356	1177	970	1774.75
131	18318	0.0419656	0.0867083	24	12	3039.14	0.387507	0.790965	24.7059	12	30896	0.0832438	0.168089	24.3529	12.0025	28234.3	3857.15	0.136612	25347	24862	23096	25893	36649	28152	29092	27165	31459	32834	33357	25934	26546	29754	29142	23184	28279.1
134	18520	0.000987235	0.00470192	24	12	12636	0.0352797	0.218682	24.8451	12	51611	0.000392354	0.00210672	24.4225	12.0036	41536.2	13950.7	0.335869	30810	28597	27283	28728	53110	44229	48843	46655	48145	55286	56468	46545	41381	48358	30222	33032	41730.8
140	21704	0.0065055	0.0205398	18	9	11925.2	0.142903	0.421214	20	6.00001	29090	0.0074193	0.0237812	19	7.60001	16055.8	10595	0.659885	5130	4133	6221	5161	34909	23162	28685	29604	13498	6526	19819	1411	5479	16831	15265	7735	13973.1
141	21811	0.00980952	0.0282233	24	12	10450.7	0.0601777	0.259973	24.5682	12	43703	0.00497922	0.0174965	24.2841	12.0016	35070.1	12396.1	0.353467	27269	23706	22361	23738	48830	38311	39176	39185	37315	50485	49709	37303	34564	39257	25929	25838	35186
146	31544	0.000987235	0.00470192	24	0	2328.86	0.345474	0.739174	21.995	7.15e-05	15095.2	0.00306393	0.0116873	22.9975	3.74e-05	12131.1	3863.68	0.318492	17203	16239	13427	13512	10474	10360	12945	13106	10453	738	10134	12711	11010	16099	14553	13374	12271.1
148	31695	0.00421867	0.0149426	24	0	178.014	0.146451	0.424255	23.6461	6.63e-05	711.749	0.00518315	0.0180554	23.8231	3.34e-05	601.208	240.112	0.399383	644	676	819	708	424	460	552	611	431	449	427	411	843	579	575	1033	602.625
151	33415	0.0419656	0.0867083	24	0	12609.1	0.469126	0.884408	23.7736	6.63e-05	52679.4	0.0970142	0.191082	23.8868	3.33e-05	43461.7	17404.2	0.400449	47717	52646	47037	63318	37194	12288	50329	43722	42380	33850	40893	8905	39822	44070	69889	62372	43527
155	34059	0.0299489	0.066265	24	15	5207.66	0.102218	0.342159	22.6735	12	49788.5	0.020783	0.0526316	23.3368	13.4682	42232.3	9008.69	0.213313	40438	40186	30712	30725	43244	37730	40064	40412	46397	56015	52159	44583	47315	45973	39349	38816	42132.4
160	42007	0.000987235	0.00470192	24	12	7351.08	0.0511478	0.2387	24.9858	12	34153.5	0.000550074	0.00281038	24.4929	12.0049	28648.3	8335.9	0.290974	22182	19243	23565	17227	32673	37547	30071	34303	38591	34671	32039	31313	30401	27464	20259	28995	28784
164	46122	0.000320124	0.00195554	18	9	3819.08	0.0428883	0.223696	24.0327	6.00002	21134.8	0.000167445	0.00109424	21.0163	7.87756	18109.7	3951.44	0.218195	14555	12005	14748	14758	22971	20249	21564	19755	18829	20059	21030	18902	15857	18821	12775	14638	17594.8
166	46141	0.0144977	0.0373749	24	0	23434.2	0.277548	0.649925	24.0327	6.63e-05	62735	0.0262173	0.0642476	24.0163	3.31e-05	42679.9	31253.3	0.73227	41964	54241	57577	97159	16478	32541	23768	28997	20093	13228	16473	41745	30328	32231	75053	100736	42663.2
168	46292	0.0299489	0.066265	24	21	551.897	0.314619	0.704552	22.9091	17.9999	3620.75	0.0533752	0.117175	23.4545	19.4756	3057.91	606.773	0.198427	3295	2732	3481	3792	2216	2246	2290	2907	3357	3460	1725	3175	4352	3495	3115	3521	3072.44
174	62250	0.0144977	0.0373749	24	9	18333.2	0.100231	0.340705	20	6	86094	0.0109479	0.0321571	22	7.425	62979.3	20365.5	0.323368	49581	31353	61405	55938	92834	93624	90474	67444	51258	51099	62246	81753	52842	50450	35633	52388	61270.1
176	62311	0.0299489	0.066265	24	21	2290.5	0.360367	0.755694	23.3952	17.9999	14881.5	0.0596711	0.127997	23.6976	19.484	12696.5	2295.2	0.180774	11538	14753	13872	14122	13820	9143	7850	10506	10572	14409	10635	12880	17803	11685	13841	16197	12726.6
180	62834	0.0144977	0.0373749	24	0	1703.07	0.694591	1	24.0327	17.9999	5069.48	0.0563738	0.122167	24.0163	21.002	3544.58	2259.75	0.637521	2756	3832	4613	9640	1613	2331	1954	1758	1385	1308	1421	3797	1980	1977	5174	11147	3542.88
183	64551	0.00980952	0.0282233	24	12	4502.86	0.113232	0.357508	24.2975	12	23104.5	0.00866688	0.026861	24.1488	12.0005	18449.3	5368.9	0.291008	15460	13841	14125	11142	22955	18673	18407	18366	22339	25176	24665	20238	20494	22916	15029	11783	18475.6
187	64604	0.000987235	0.00470192	24	12	1608.67	0.0467855	0.227978	24.4321	12	7120	0.000507276	0.00262352	24.2161	12.0009	5660.08	1933.17	0.341544	4471	4113	3649	3889	7353	6157	6395	5814	6434	8075	7776	6195	5622	6403	4392	4043	5673.81
188	64612	0.0065055	0.0205398	24	12	1645.26	0.102408	0.342159	21.8859	12	11611.8	0.00553884	0.0190581	22.9429	12.0255	9282.6	2411.98	0.259839	7957	7096	7303	7013	7468	9668	10089	9232	9768	13563	12894	10222	10177	9694	8019	7074	9202.31
192	64643	0.00421867	0.0149426	24	15	1249.46	0.193589	0.523062	23.3952	12	6652.25	0.00662354	0.0218202	23.6976	13.4831	5243.81	1790.91	0.341528	3922	4175	3740	3874	7535	4189	3800	5323	6038	7715	7087	5769	5999	5570	4649	4366	5234.44
193	64666	0.000320124	0.00195554	24	9	2355.02	0.0412283	0.221664	21.0501	6.00001	6882.25	0.000161486	0.00108041	22.5251	7.43366	4235.02	2641.28	0.623674	3500	2888	996	2733	8468	6196	7252	5613	4509	4849	4793	4462	1281	3899	757	2931	4070.44
194	64668	0.0419656	0.0867083	24	12	3251.28	0.395597	0.799733	24.5682	12	30835.2	0.0846387	0.169882	24.2841	12.0016	28023.7	4200.16	0.149879	24839	24595	22819	25169	37918	27931	28889	26690	31584	32541	33393	25823	26292	29609	28420	22495	28062.9
195	64736	0.000572095	0.00305238	24	12	2033.99	0.0410961	0.221664	24.7059	12	7887.25	0.000274091	0.00154674	24.3529	12.0025	6363.65	2157.85	0.339091	4948	4433	4304	4222	7742	7505	7096	7386	7622	7982	8844	7101	7105	6988	4541	4401	6388.75
196	64742	0.0144977	0.0373749	18	9	1247.51	0.397298	0.801174	24.1644	12	7639	0.0354628	0.0819045	21.0822	10.5052	6889.49	1177.93	0.170975	6176	5313	6242	5008	10048	6847	6902	6607	6427	9118	8484	6527	6188	7114	5620	5317	6746.12
204	66305	0.000572095	0.00305238	24	12	19524.6	0.0450201	0.224568	23.9024	12	81268.5	0.000297913	0.00166318	23.9512	12	59706.8	25410.1	0.425582	46725	41055	33377	32024	80519	57651	61465	61867	72683	95222	84597	72572	61429	68965	44515	39994	59666.2
208	68356	0.0254844	0.0612061	24	15	570.282	0.594136	1	24.1644	12	3606	0.0785879	0.161191	24.0822	13.5053	2881.47	958.255	0.332558	2502	1748	2058	2272	4952	2753	2469	1748	2988	4487	3476	3473	2857	3393	2835	2115	2882.88
212	84221	0.0144977	0.0373749	18	9	9366.34	0.3796	0.778596	20	6.00001	28338	0.0341339	0.0790519	19	7.60001	17701.8	10964.7	0.619413	12510	4576	374	9965	46640	23244	11074	32394	17516	17717	25723	5403	15381	7560	5113	13552	15546.4
213	84566	0.0299489	0.066265	18	3	235.467	0.508377	0.920308	20	6.63e-05	1354.75	0.0789402	0.161521	19	1.58336	1217.27	315.692	0.259344	1433	1423	1421	1142	994	1518	1079	1407	648	885	1089	1138	1817	1051	1667	1621	1270.81
221	95422	0.00421867	0.0149426	18	0	9515.54	0.268148	0.640364	23.6461	17.9999	18269	0.00880598	0.0270929	20.8231	18.337	12106.7	9161.15	0.756704	18215	20428	25273	22054	8166	2734	783	6233	4539	8521	9635	14415	7974	8663	36642	19797	13379.5
222	95438	0.0144977	0.0373749	24	9	1774.13	0.319534	0.707003	21.253	6	7919.75	0.0295307	0.0703231	22.6265	7.43635	5270.14	2284.22	0.433426	5644	5158	973	5342	11205	6999	6049	7426	3395	7561	3929	5957	4846	1889	5154	672	5137.44
234	102337	0.00980952	0.0282233	24	9	563.211	0.261708	0.63215	20	6	5246.5	0.0178806	0.0477005	22	7.425	4341.91	760.005	0.175039	3952	3145	4310	4176	6714	4528	5177	4567	3503	4860	4071	4517	4053	3691	3454	3732	4278.12
237	103821	0.0299489	0.066265	24	9	1334.66	0.109343	0.351928	20	6	7022.25	0.022011	0.0548973	22	7.425	5103.48	1556.93	0.305073	4646	3194	5314	2998	6891	6225	7458	7515	6077	5032	4261	3728	4266	2755	5296	3909	4972.81
240	104135	0.000572095	0.00305238	24	12	5702.46	0.0394735	0.221664	20.9501	12	38786	0.000264179	0.00151498	22.4751	12.0555	31724	7903.71	0.24914	27980	26794	24494	25675	34893	30397	32524	29023	35849	40036	42668	36591	31389	32243	26425	24696	31354.8
241	104994	0.00164724	0.00708482	24	12	9261.33	0.070335	0.285059	24.5682	12	43470.5	0.0011659	0.00528417	24.2841	12.0016	34427.2	11797	0.342664	30242	25728	19337	20439	45791	38787	38314	33337	41069	45334	51899	35580	30743	40156	28777	27068	34537.6
253	106482	0.0210199	0.0507729	18	9	1446.39	0.457827	0.870974	22.1053	5.99999	4419.25	0.0543105	0.118611	20.0526	7.73458	3123.83	1467.9	0.469903	1806	1579	961	2736	6903	4842	5274	658	2941	4458	2946	3140	2027	1787	1884	2151	2880.81
254	106522	0.0419656	0.0867083	24	0	1252.99	0.635816	1	24.0327	6.63e-05	5537.48	0.123373	0.23477	24.0163	3.31e-05	3931.68	2320.36	0.59017	3772	3970	6088	8320	1857	3229	2714	3084	2235	1620	2253	3516	2397	2759	4445	10628	3930.44
255	106742	0.0065055	0.0205398	18	6	353556	0.250443	0.616362	20	6.00001	2.03097e+06	0.0120885	0.03514	19	6.01667	1.5482e+06	378912	0.244745	1671234	1728185	1492033	1688777	2191192	1832313	1989625	2110761	1527408	1553710	201381	377912	1677833	1707498	647960	1638641	1.50228e+06
264	110031	0.0419656	0.0867083	18	9	1797.11	0.0252924	0.211033	20	6	11915	0.00833011	0.0260084	19	7.6	6656.06	3956.45	0.594412	3700	3214	2418	5135	12403	11276	12159	11822	3064	4342	3899	5047	2563	3236	3384	6391	5878.31
265	110123	0.0144977	0.0373749	18	9	6189.13	0.174953	0.48515	24.0327	6.00001	32093.5	0.0176966	0.0474318	21.0163	7.87756	27758.2	6894.56	0.248379	21657	21800	21751	20317	37625	28748	33027	28974	28805	34502	35216	28937	27074	29659	9166	22498	26859.8
266	110125	0.0419656	0.0867083	24	12	2731.55	0.194918	0.524971	23.52	12	18213	0.0474929	0.10648	23.76	12.0012	15329.9	3355.57	0.21889	12475	12292	14103	11580	18312	14480	16521	14493	16496	19887	19618	16851	16623	18010	10923	12196	15303.8
267	110131	0.0065055	0.0205398	24	15	20811.2	0.082618	0.298914	21.5648	12	147300	0.0045839	0.0163047	22.7824	13.4583	119283	34370	0.288138	110193	100768	85290	92224	109227	116188	118548	109076	141389	150767	163713	133329	116703	146550	116151	87968	118630
268	110134	0.00421867	0.0149426	18	9	7147.44	0.206037	0.544937	23.3952	5.99999	66066.2	0.00699527	0.0228566	20.6976	7.82848	59524.7	7609.28	0.127834	60125	51313	47262	47812	67713	63253	71843	61456	61386	60852	65673	57767	45594	62283	56428	54279	58439.9
272	110359	0.0144977	0.0373749	24	15	13735.7	0.284914	0.661659	25.2722	12	135321	0.0268048	0.0653789	24.6361	13.5478	121748	14077.3	0.115626	112801	117426	96162	99972	129933	101594	123390	110336	126522	157425	123542	133795	128624	150942	119415	118722	121913
273	110371	0.000572095	0.00305238	24	9	4972.73	0.0746939	0.29287	20	6.00001	17934	0.00047264	0.00250588	22	7.42501	8563.13	7406.16	0.864889	3415	3255	3760	4010	28783	14380	12508	16065	5454	10352	7192	3668	6374	3154	3341	1354	7941.56
280	110962	0.00421867	0.0149426	24	9	599.98	0.160168	0.450073	20	6.00001	3432.75	0.00560813	0.0192181	22	7.42501	2073.89	1059.21	0.510733	1686	1440	1393	777	2368	3642	5310	2411	1668	1662	1787	1963	1146	2019	1171	1317	1985
289	113563	0.00267199	0.0105751	18	12	1681.15	0.0775021	0.298914	20	12	6606.5	0.00196366	0.00803576	19	12.0333	4604.16	2317.03	0.503247	3533	3401	2646	2451	4473	5428	5067	4545	6800	7612	7437	4577	1139	4879	2845	2454	4330.44
291	117195	0.0210199	0.0507729	18	6	22923.7	0.126045	0.383596	20	5.99999	94872.8	0.0183697	0.0482901	19	6.01666	71074.2	25694.5	0.361517	63695	60386	46561	46369	97449	93509	102083	86450	66719	63357	59576	44365	71342	71358	63258	50892	67960.6
298	117769	0.000320124	0.00195554	24	6	9799.09	0.0440799	0.223696	20.0911	6	20785.8	0.000171711	0.00111348	22.0456	6.04753	9460.59	9579.86	1.01261	5457	21497	3538	3542	24973	17508	18041	22621	5840	4360	3456	2359	2189	1971	3008	1706	8879.12
299	117790	0.0144977	0.0373749	18	9	90.6864	0.132869	0.396874	20	5.99999	465.5	0.0139698	0.0393866	19	7.6	286.445	149.79	0.522928	102	119	96	473	465	464	592	341	247	137	203	326	124	176	167	80	257
301	118125	0.0210199	0.0507729	24	9	315.9	0.161591	0.452562	20	6	1477.5	0.0227063	0.0564644	22	7.425	997.286	418.215	0.419353	483	873	645	892	1955	1336	1677	942	891	733	1229	991	878	949	344	577	962.188
302	118602	0.00421867	0.0149426	18	9	1352.7	0.0993873	0.340583	20	5.99998	6552.5	0.00368002	0.0136664	19	7.59999	3901.77	2178.3	0.558284	3007	1657	2786	1508	3909	8483	8830	4988	3502	2247	2868	2969	1846	3397	1668	1912	3473.56
308	119060	0.00164724	0.00708482	18	9	4475.63	0.3499	0.739263	20	6	15489	0.00487538	0.0172687	19	7.6	8971.46	6433.95	0.717157	3218	2992	4072	2591	30680	8997	13034	9245	6696	14055	5592	5635	6692	2595	3192	4021	7706.69
311	120929	0.00421867	0.0149426	24	12	248.548	0.472434	0.884408	24.0327	12	1585.5	0.014386	0.0402903	24.0163	12	1209.17	491.071	0.406121	828	621	1052	817	2169	1198	1164	999	1118	2477	1373	1374	1234	1087	890	950	1209.44
312	120954	0.0210199	0.0507729	24	12	3647.26	0.226823	0.581191	25.2722	12	32421	0.0302558	0.071645	24.6361	12.008	28428.6	4968.08	0.174756	28436	24159	19880	21151	31120	30049	31188	28749	29019	34364	38177	28124	26589	33713	26936	24877	28533.2
314	120986	0.0065055	0.0205398	18	9	10250.2	0.410784	0.814802	20	5.99999	41523.2	0.0185055	0.0484476	19	7.6	32293	9832.48	0.304477	24697	22429	17605	18585	56070	34013	39354	36656	32920	22641	41607	28528	31796	34818	26303	17741	30360.2
316	121468	0.00164724	0.00708482	24	6	359.917	0.0819097	0.298914	20.7529	6	1273	0.00133721	0.00590194	22.3765	6.03175	919.945	202.757	0.220401	907	1066	1124	1117	1280	1225	1335	1252	626	736	697	364	188	608	1028	1001	909.625
322	124976	0.0144977	0.0373749	18	9	1699.18	0.017794	0.211033	20	6	7930	0.00238951	0.00941287	19	7.6	3467.65	3429.75	0.98907	482	1570	989	556	8538	7709	8556	6917	805	2017	1670	1173	689	144	814	2066	2793.44
329	125886	0.0065055	0.0205398	18	9	160.16	0.0278989	0.211033	20	6	464.25	0.00174496	0.00728216	19	7.6	227.153	181.048	0.797034	96	107	56	79	534	441	543	339	146	140	113	60	83	78	134	116	191.562
336	126582	0.000987235	0.00470192	18	9	1481.04	0.0178285	0.211033	20	5.99999	5572	0.000210288	0.00127584	19	7.6	2385.22	2503.62	1.04964	484	497	420	459	6723	5009	5637	4919	1079	1377	1075	449	642	350	584	585	1893.06
339	128047	0.0299489	0.066265	24	12	4138.87	0.329737	0.719901	23.9024	12	28184.5	0.0554765	0.120844	23.9512	12	23313.3	5479.26	0.235027	20041	18369	17960	17621	29496	23785	22891	20613	21996	31417	33601	25724	23445	30089	18787	17038	23304.6
342	130528	8.77e-05	0.000697384	24	9	1053.59	0.0436029	0.223696	20	5.99998	5597.5	5.15e-05	0.000417607	22	7.42499	3490.73	1659.74	0.475471	2607	2511	2896	2595	7405	4269	6045	4671	3076	3059	3585	2660	2904	2066	2258	1016	3351.44
343	130541	0.0299489	0.066265	24	12	4347.29	0.247265	0.61488	23.9024	12	29028	0.0437326	0.0985736	23.9512	12	24893.8	5625.3	0.225972	21924	17851	18271	25530	34432	24674	27605	21627	25696	31472	31681	27263	20683	25990	22340	21118	24884.8
348	130599	0.00267199	0.0105751	18	9	27749.7	0.0734798	0.290615	24.7059	12	127257	0.00187221	0.0076989	21.3529	10.5239	111381	24351.9	0.218636	89384	83726	78053	76617	127358	123279	139523	115936	121372	125672	154611	107372	93345	124247	85639	92817	108684
352	130801	0.0144977	0.0373749	24	12	396.687	0.151148	0.427609	23.3952	12	2100.25	0.0156093	0.0427227	23.6976	12.0019	1612.62	521.186	0.323193	1287	1249	954	1116	2244	1558	1343	1440	2245	1433	2355	2368	1530	1803	1594	1201	1607.5
358	131471	0.00267199	0.0105751	24	12	1486.16	0.110212	0.351928	23.0287	12	8383	0.00268875	0.0104511	23.5144	12.0051	6527.9	2131.55	0.326529	6311	4034	4410	4764	7183	7459	6627	6042	6954	8316	10406	7856	6697	7369	4841	4643	6494.5
359	131496	0.000320124	0.00195554	18	9	1806.3	0.0604446	0.259973	20	5.99999	4190.25	0.00022935	0.00133339	19	7.59999	2588.83	1892.17	0.730895	844	371	452	525	4637	4488	3005	4631	2814	2967	3277	1935	2421	2167	443	493	2216.88
367	133808	0.00267199	0.0105751	18	9	2170.64	0.344845	0.739174	20	6	11536	0.00736179	0.023687	19	7.6	8963.04	2569.79	0.286709	7717	4372	4196	9067	13016	10633	11776	10719	9818	10165	9056	5165	4730	8156	9682	7058	8457.88
374	160854	0.000320124	0.00195554	18	9	17711.3	0.017086	0.211033	20	6	95746	7.17e-05	0.000536931	19	7.6	45407.1	37783.1	0.832097	17128	16061	14167	19422	108516	94519	95270	84679	19549	23007	22238	18232	19059	18645	17773	19411	37979.8
376	161387	0.0144977	0.0373749	18	9	729.027	0.482374	0.893717	20	6	3415	0.0416998	0.0947518	19	7.6	2588.29	730.523	0.282241	410	2059	2217	2051	3580	3190	3490	3400	2385	3007	1847	1874	2818	2198	2309	2280	2444.69
390	170728	0.00980952	0.0282233	24	15	4405.63	0.444877	0.856236	21.1511	12	34073.2	0.0280798	0.067497	22.5755	13.4589	28462.6	6412.61	0.2253	22958	25623	23043	26910	9633	27584	30112	30819	30009	35809	37288	33187	29142	33675	26161	31242	28324.7
391	170736	0.0144977	0.0373749	24	12	674.757	0.196519	0.527597	23.6461	12	3865.75	0.0195468	0.050546	23.8231	12.0007	3067.35	907.303	0.295793	2317	2354	1741	2787	4153	2975	2811	2916	2762	4289	4538	3874	3586	2678	2304	2909	3062.12
392	170766	0.0144977	0.0373749	24	15	4059.85	0.0990293	0.340583	22.4427	12	28836.2	0.0108339	0.0320456	23.2214	13.4648	22577.1	7694.32	0.340802	19987	16251	12897	19478	27565	19406	18600	20700	24276	32066	32565	26438	24597	25151	19946	19728	22478.2
393	170791	0.00267199	0.0105751	24	12	8527.71	0.114123	0.357814	24.1644	12	51212.8	0.00277352	0.0106761	24.0822	12.0001	43061.3	10227.9	0.23752	36677	35985	29435	36209	55771	41769	43268	44388	42897	54577	58057	49320	40949	47751	38924	33444	43088.8
398	187301	0.0210199	0.0507729	24	12	8289.94	0.14457	0.422106	24.0327	12	55066	0.0206528	0.0526316	24.0163	12	47461.2	9973.26	0.210135	46882	39691	35331	37602	56669	48934	53957	44505	51176	54903	61112	53073	41446	53839	45517	34827	47466.5
399	187303	0.0144977	0.0373749	24	12	6946.26	0.168075	0.469162	24.5682	12	31575.2	0.0170986	0.0461991	24.2841	12.0016	25412.9	8498.78	0.334428	22176	16205	16144	17861	40289	26343	27688	22865	30869	35776	33692	25964	25830	27867	23150	15159	25492.4
400	187304	8.77e-05	0.000697384	18	9	15271.4	0.0331886	0.211033	24.2975	6	71670.8	4e-05	0.000344158	21.1488	7.89841	61164.4	14091.8	0.230392	46918	44053	50764	40499	71903	69928	77733	67119	60515	68973	75551	64059	54247	59195	48904	50069	59401.9
403	187855	0.00267199	0.0105751	24	0	1945.6	0.221027	0.574701	25.7143	6.63e-05	4915.98	0.00498121	0.0174965	24.8571	3.21e-05	2300.77	2407.93	1.04658	4381	3496	3698	8089	1494	685	726	791	745	484	905	605	1186	848	1460	6239	2239.5
408	209676	1.91e-05	0.000211771	18	9	4254.66	0.0660362	0.274912	20	5.99999	11757	1.84e-05	0.000186747	19	7.59999	8457.39	4001.98	0.473194	4156	3367	4809	3292	9117	12465	13724	11722	7583	7118	10364	10487	5030	7614	5773	6110	7670.69
409	209677	0.00164724	0.00708482	18	9	261.63	0.47831	0.888902	23.7736	6	676.5	0.00641829	0.0214707	20.8868	7.85741	434.126	295.992	0.681811	102	103	139	161	1401	385	418	502	217	775	754	371	471	151	187	168	394.062
415	210345	0.000987235	0.00470192	24	12	811.051	0.0302055	0.211033	22.6735	12	4644.75	0.000340554	0.0018642	23.3368	12.0097	3401.33	1241.24	0.364929	2500	2303	1898	2463	3745	3151	3046	3271	4722	5058	5198	3601	3112	3912	3276	2743	3374.94
419	210841	0.0144977	0.0373749	24	9	355.851	0.0998388	0.340705	20.1831	6	4089.75	0.0109107	0.0321571	22.0915	7.42584	3288.26	593.211	0.180403	2940	3143	2742	3426	4153	4029	4938	3239	2619	3258	3178	3316	2284	2935	2841	2810	3240.69
422	210890	0.0065055	0.0205398	18	0	508.056	0.451792	0.865592	24.0327	17.9999	3317.75	0.0200732	0.0515906	21.0163	18.3786	3132.68	445.442	0.142192	3848	3351	3764	3710	2015	2854	3513	2485	2932	2991	3130	3187	2909	3294	3387	3681	3190.69
425	211140	0.0210199	0.0507729	24	12	4467.5	0.20621	0.544937	21.8859	12	18834.8	0.0279192	0.067497	22.9429	12.0255	13911.5	6167.25	0.443321	10206	7824	9048	13944	21420	13608	9326	15893	21159	23110	13886	17184	13033	10289	10806	8563	13706.2
434	215775	0.0144977	0.0373749	18	0	327.39	0.208633	0.547904	24.7059	17.9999	1591.5	0.0205708	0.0526316	21.3529	18.455	1433.93	315.801	0.220235	1832	1391	2025	1945	1436	1255	1299	874	1198	1201	1317	1385	1532	1361	1471	2002	1470.25
439	223071	0.000171384	0.00126734	18	9	639.225	0.0345595	0.215805	20	6	1821.75	7.72e-05	0.000556349	19	7.6	1120.59	628.715	0.561056	586	511	543	586	1547	2247	1797	1696	1109	807	853	903	943	711	475	638	997
442	223087	0.00421867	0.0149426	18	9	2804.03	0.337054	0.730428	20	5.99999	7023.25	0.0107437	0.0318905	19	7.59999	5076.91	2320.84	0.457136	2069	2249	1895	2507	6528	5823	9692	6050	6271	5845	2019	6727	4823	5717	2639	3077	4620.69
443	223096	0.00267199	0.0105751	18	9	1564.47	0.1116	0.35368	20	5.99999	3081.5	0.00271887	0.0105138	19	7.59999	1920.91	1360.97	0.708502	537	236	556	582	2812	3505	3720	2289	1777	722	2577	3030	1115	2063	478	455	1653.38
446	223126	0.0065055	0.0205398	18	9	2107.89	0.671501	1	24.1644	6.00002	5411.75	0.0281037	0.067497	21.0822	7.8879	3734.53	1812.8	0.485416	312	2081	2315	1493	5679	8211	7402	355	4165	4427	3589	4081	4072	3487	1665	2714	3503
448	223135	0.00980952	0.0282233	24	12	4600.08	0.089445	0.313963	23.7736	12	23717.5	0.00705311	0.0229566	23.8868	12.0003	18885.8	5628.44	0.298025	15517	14714	14125	12572	23285	18726	18658	19335	22050	25581	26573	20666	21121	21422	15315	12180	18865
456	224095	8.77e-05	0.000697384	18	9	969.09	0.0160513	0.211033	20	6	3458.75	2.04e-05	0.000203232	19	7.6	1789.63	1531.84	0.855953	533	492	550	529	3391	3209	3980	3255	1130	1050	1729	1633	525	737	500	573	1488.5
458	224100	0.000987235	0.00470192	18	6	2740.22	0.01888	0.211033	20	6.00001	6202	0.000221622	0.00130076	19	6.01667	3345.07	2834.17	0.847268	2018	2181	1811	2611	7095	6038	6301	5374	1336	1891	1407	1522	2397	1853	1977	2214	3001.62
465	228291	0.0299489	0.066265	24	12	3660.69	0.31774	0.707003	25.1282	12	24629	0.0538107	0.117825	24.5641	12.0063	21548.3	4298.35	0.199476	19555	18094	16825	14910	29004	21801	23776	20350	23000	28914	26040	20562	20885	26120	19097	17122	21628.4
466	228300	0.00980952	0.0282233	24	12	15924.6	0.0832943	0.300073	24.2975	12	83429.5	0.00662631	0.0218202	24.1488	12.0004	67426.7	19202.8	0.284795	55474	53314	45434	47765	85784	64799	71328	68488	79131	95336	84546	74705	77406	75087	48772	52959	67520.5
469	228316	0.000572095	0.00305238	24	12	2170.11	0.0403084	0.221664	23.7736	12	7339.75	0.000269283	0.00153382	23.8868	12.0003	5183.5	2741.57	0.528904	3344	3037	3208	2815	7153	5938	6219	4801	7051	8618	8118	5572	4720	5832	3436	2912	5173.38
470	228318	0.00267199	0.0105751	24	12	2986.82	0.0897616	0.313963	23.9024	12	18901.2	0.00223906	0.00894562	23.9512	12	15257.1	4188.37	0.274519	13635	12558	10783	9813	16158	17076	14474	16456	19319	17847	22610	15829	13611	18205	13932	11701	15250.4
472	228360	0.000320124	0.00195554	18	9	35216.4	0.0550049	0.245657	20	6.00001	106373	0.00021037	0.00127584	19	7.60001	55729.2	42872.8	0.769305	32939	15820	16748	7135	145965	79124	83280	117123	30817	49336	29415	40080	21214	18057	26332	43437	47301.4
477	229314	0.00164724	0.00708482	18	9	3765.52	0.0459121	0.226339	23.9024	6.00002	21383.8	0.000793317	0.00379981	20.9512	7.8674	18409.9	3913.01	0.212549	15153	12994	14748	15120	22500	20885	22119	20031	19121	19112	22646	19174	16616	18994	12941	14087	17890.1
478	229362	0.0065055	0.0205398	24	12	4355.07	0.254074	0.618637	24.4321	12	32566	0.01224	0.0353366	24.2161	12.001	28588.6	5758.9	0.201441	26752	25643	19153	23682	38550	27483	30129	29857	32502	38406	31630	27726	27663	28759	28797	21340	28629.5
479	229423	0.0299489	0.066265	24	9	3707.18	0.497767	0.913018	20	5.99999	45708	0.0776072	0.159568	22	7.42499	40490.4	5273.25	0.130234	37336	34961	29832	44154	57098	39583	44385	41766	40280	45303	40888	38185	36239	36998	37002	36756	40047.9
481	232329	0.00421867	0.0149426	24	9	1272.79	0.233901	0.589079	23.52	6	15813.8	0.00781614	0.0248642	23.76	7.48561	13823.8	1625.22	0.117567	13387	11842	13540	15926	19430	14320	15598	13907	13687	14507	13446	13691	10966	12027	12161	12479	13807.1
483	232331	0.0299489	0.066265	24	6	3372.55	0.29242	0.671689	20.1831	6.00001	32711	0.05025	0.110877	22.0915	6.04512	27708.9	3944.44	0.142353	30049	29088	25760	26068	39980	27507	33602	29755	28371	27442	21114	22381	19002	25558	27037	26883	27474.8
485	232366	0.00980952	0.0282233	24	12	1178.75	0.198876	0.530547	21.5648	12	7823.5	0.0141234	0.0396867	22.7824	12.0344	6343.42	1625.58	0.256262	5760	3968	4735	6113	7837	5966	6691	4900	7307	8029	8603	7355	6368	6930	4123	5821	6281.62
498	342012	0.00267199	0.0105751	18	6	2604.27	0.0365736	0.221664	20	6	5438.25	0.00100005	0.00465769	19	6.01667	2876.2	2601.63	0.904535	1528	1671	1798	1386	6038	5491	5400	4824	932	1568	1208	1236	3411	1573	1206	1705	2560.94
499	342074	0.0210199	0.0507729	24	0	14909.5	0.401385	0.804193	23.3952	6.63e-05	48767.9	0.0487251	0.108665	23.6976	3.36e-05	38212.5	20873.4	0.546246	49377	61949	35724	48022	16859	40840	34978	32280	21114	15061	25991	28288	27260	38029	87495	51544	38425.7
503	342950	0.0419656	0.0867083	18	0	130464	0.367171	0.762377	24.0327	17.9999	354827	0.0797059	0.162693	21.0163	18.3786	242506	146479	0.604021	274436	313132	374023	568802	119352	211778	101100	135612	148162	92196	119843	307528	149928	205763	432760	630863	261580
511	345862	0.00421867	0.0149426	18	15	2355.73	0.0378582	0.221664	20	12	9038.75	0.00155593	0.00669209	19	13.6167	6095.34	3301.09	0.541575	6313	6178	4218	5124	4383	4365	3396	2774	9415	10332	9178	7230	6159	7026	6325	4598	6063.38
515	350642	0.00980952	0.0282233	24	12	3886.44	0.103595	0.342472	21.4599	12	21151.5	0.00801963	0.0253204	22.7299	12.0376	15837.7	5668.18	0.357891	13924	11742	10317	10261	17036	15795	13605	15811	19758	23171	23597	18080	17639	18834	8176	12072	15613.6
523	355637	0.00267199	0.0105751	24	12	1645.44	0.0515342	0.2387	24.4321	12	7256.5	0.00136191	0.00597961	24.2161	12.001	5830.49	1946.08	0.333777	4625	4260	3979	3964	7451	6504	6682	6069	6694	8324	7770	6238	5833	6622	4593	3901	5844.31
524	355700	0.0419656	0.0867083	24	9	2097.81	0.320428	0.707003	20	6	23773.5	0.0713898	0.149597	22	7.425	14634.1	6607.79	0.451535	11290	12428	10677	11461	33523	15117	35584	10870	15994	13013	12514	6508	11248	10058	11460	3527	14079.5
525	355819	0.000987235	0.00470192	24	12	917.294	0.0580393	0.253508	25.2722	12	6516.75	0.000616945	0.00311428	24.6361	12.008	5561.44	1151.45	0.207042	4813	4192	4053	4357	6191	6104	6363	5139	5700	6698	7360	6309	5856	6207	5011	5018	5585.69
526	355856	0.000987235	0.00470192	18	9	1533.71	0.0895785	0.313963	24.5682	6.00003	6470.5	0.000913821	0.00430364	21.2841	7.92002	5378.3	1729.55	0.321579	4012	1876	3974	3723	7840	5716	6640	5686	5664	7803	5983	6132	5295	5414	4109	2875	5171.38
529	357025	0.00421867	0.0149426	24	12	1659.58	0.0303058	0.211033	24.0327	12	5318.75	0.00127398	0.00571259	24.0163	12	4025.57	1961.88	0.487353	2722	2742	2538	2933	6128	4815	5064	4111	5263	6023	5444	4545	4089	3238	2712	2059	4026.62
547	378571	0.0419656	0.0867083	18	9	1173.27	0.988447	1	24.8451	6	4893.75	0.173494	0.313854	21.4225	7.94237	3356.06	1714.87	0.510977	789	674	1610	1706	11585	2119	2180	3691	2168	8283	1567	3117	7001	1240	984	1855	3160.56
551	379096	0.0419656	0.0867083	24	6	1376.74	0.067179	0.274912	20	5.99997	12458	0.0193716	0.0502469	22	6.04998	10245.6	1821.88	0.17782	10714	9371	9611	9648	13165	12400	12260	12007	8880	10145	6560	10118	8882	10347	9090	8924	10132.6
553	379597	7.77e-06	0.000128434	18	9	661.852	0.0264744	0.211033	20	6	2885	3.37e-06	6.32e-05	19	7.6	1741.26	972.97	0.558772	734	758	936	1034	3167	2554	3000	2819	1223	1347	1401	1348	1107	1181	855	1336	1550
555	380135	4.22e-05	0.000390745	18	9	12051.4	0.0521301	0.24014	20	6	65732.5	3.08e-05	0.000276616	19	7.6	52579.2	13412	0.255081	39492	44028	41712	37045	72447	67854	56830	65799	55083	47844	46355	55749	46563	45727	30665	45891	49942.8
558	381608	0.0419656	0.0867083	18	6	59039.2	0.0405288	0.221664	20	6.00001	201578	0.0125463	0.0360974	19	6.01667	135039	65043.4	0.481664	127680	106061	108651	99758	162758	228985	201698	212870	53449	94086	119900	100152	81065	128035	111122	98239	127157
560	382613	0.00164724	0.00708482	24	12	12222.7	0.0444349	0.223696	24.8451	12	49336.5	0.000770186	0.0037101	24.4225	12.0036	40462.2	13251.1	0.327492	29483	28032	27132	28376	52470	43455	48576	47587	45250	55057	51767	45272	40899	47260	28622	31114	40647
567	389988	0.0144977	0.0373749	18	9	17284.9	0.0160389	0.211033	20	6	95746	0.00217796	0.00874297	19	7.6	44978.4	37700.7	0.838196	17440	16681	14766	20214	108516	94519	95270	84679	19549	21147	22301	15787	18656	16301	15392	19858	37567.2
568	390121	0.0299489	0.066265	18	9	8021.77	0.393032	0.796457	20	6	27617.5	0.0640587	0.136367	19	7.6	17371.5	9881.15	0.568813	12510	4576	6331	9965	46640	20811	11074	31945	16543	18084	21717	5403	15275	7560	5113	13319	15429.1
576	390549	1.91e-05	0.000211771	24	9	5963.56	0.0250714	0.211033	20	6	16949.5	7.44e-06	9.65e-05	22	7.425	8588.65	7699.05	0.896421	3200	2610	4818	3610	12877	19882	21410	13629	9003	6502	10717	8213	4757	607	3116	2129	7942.5
577	391853	0.0299489	0.066265	24	9	18021	0.103094	0.342159	20	6	85572.2	0.0209348	0.0526807	22	7.425	62414.4	20131	0.322538	49581	31353	60334	55086	92834	92179	90474	66802	48190	50888	62481	80792	52207	52088	35633	50677	60724.9
581	395930	0.00980952	0.0282233	24	12	1508.97	0.263014	0.633488	23.2718	12	6776.25	0.017957	0.047753	23.6359	12.0028	5287.77	1755.14	0.331925	4434	3539	3994	3796	7977	4794	4957	4734	5464	7329	7817	6495	7013	4289	3977	3664	5267.06
584	401994	0.0254844	0.0612061	24	3	914.289	0.246705	0.61488	21.3559	6	6062.5	0.0381581	0.0874111	22.678	4.60309	5198.55	900.993	0.173316	5630	5873	4834	6396	8033	5205	5184	5828	4277	4442	4015	4620	4164	4277	5557	4535	5179.38
585	401996	0.0065055	0.0205398	24	9	732.916	0.169882	0.472642	20	6	6151.75	0.00862887	0.0268418	22	7.425	5088.36	988.06	0.19418	5093	3586	4390	4656	7059	5431	6693	5424	5297	5200	4380	5535	4321	3293	5020	4709	5005.44
592	402267	0.00421867	0.0149426	24	12	16637.2	0.05288	0.241391	24.5682	12	89574.5	0.00209876	0.00846533	24.2841	12.0016	72782.2	21309.7	0.292788	64753	54581	50560	44897	80083	83753	78196	79542	86115	89328	104954	77901	64729	86930	62430	58952	72981.5
595	402286	0.0299489	0.066265	18	9	2386.13	0.2933	0.671713	27.3065	6.00002	7845.25	0.0503748	0.110877	22.6533	8.1521	6437.94	1737.14	0.269828	2414	5531	2653	3484	10045	8134	7857	5345	6888	7699	7112	7118	7534	8053	6054	5389	6331.88
596	403856	0.00164724	0.00708482	18	9	200.288	0.227951	0.582312	20	6.00002	751.5	0.00333709	0.012503	19	7.60001	541.58	240.132	0.443393	328	268	387	248	352	1108	920	626	503	646	552	524	429	396	329	294	494.375
601	413572	0.0144977	0.0373749	18	6	337.643	0.144122	0.422106	20	6.00001	1236	0.0149831	0.0416856	19	6.01667	823.635	406.504	0.493549	608	640	809	572	1207	1141	1758	838	387	627	357	789	614	729	675	639	774.375
605	417914	0.0419656	0.0867083	18	9	2896.66	0.500376	0.915004	20	6	8672.5	0.102122	0.200207	19	7.6	5847.6	2998.04	0.512697	2793	1675	3734	3852	14166	9440	10043	1041	8017	4270	5158	5398	4550	3516	3606	2873	5258.25
606	417946	0.0299489	0.066265	18	0	564.625	0.813119	1	20	17.9999	2140	0.114823	0.220996	19	18.05	1897.41	512.136	0.269913	2257	2162	2986	3052	1035	1386	1689	1376	1682	1654	1583	2717	1729	1138	2050	3643	2008.69
608	421550	0.00164724	0.00708482	24	12	1182.28	0.0566373	0.250108	24.1644	12	6627	0.000959052	0.00449156	24.0822	12.0001	5536.61	1488.36	0.268821	4980	4138	4247	4248	7527	5500	5700	5871	6166	7174	6700	6468	5580	5569	4132	4650	5540.62
609	421578	0.0299489	0.066265	18	9	3111.45	0.533885	0.950529	20	6	45708	0.0821183	0.166408	19	7.6	41163.2	4870.19	0.118314	37521	35208	30793	44154	57098	39583	44385	41766	40280	45303	40888	37902	36937	37988	36731	36756	40205.8
618	471785	0.0419656	0.0867083	18	6	874.514	0.152739	0.430632	20	6.00001	7990	0.0387787	0.088592	19	6.01667	7265.1	572.288	0.0787722	6898	8263	8025	6425	7470	8183	8242	8065	6270	6595	5652	6839	7666	6854	6725	6960	7195.75
620	473742	0.0210199	0.0507729	18	9	2265.04	0.890933	1	25.2722	6.00001	6866	0.0932202	0.184471	21.6361	7.9774	5039.9	1890.93	0.375192	2118	3487	1060	3428	11184	4241	3702	8337	5319	8902	3645	3640	7703	3102	3893	3696	4841.06
625	475521	0.00421867	0.0149426	24	12	1675.49	0.871466	1	24.5682	6	7444	0.0242858	0.0598623	24.2841	9.03634	5223.68	2774.48	0.531135	2727	2153	2352	2621	16986	3806	4018	4966	4347	12866	5121	5529	7522	3553	2566	3028	5260.06
636	513423	0.0065055	0.0205398	24	15	2892.07	0.252248	0.616362	25.2722	12	20181.2	0.0121638	0.0352374	24.6361	13.5478	16736.4	4575.13	0.273364	13061	10820	13649	12753	24747	15285	16188	14267	19793	22559	15971	22402	19411	15669	14360	17703	16789.9
641	514511	0.00164724	0.00708482	18	9	5254.51	0.0387401	0.221664	20	6	24221.2	0.000680231	0.00339311	19	7.6	17784.1	6073.53	0.341514	14239	13239	13357	11164	26242	21397	27106	22140	18180	16036	16558	15352	13962	16747	7679	12045	16590.2
671	9-hydroxydec-2-enoic acid	0.00164724	0.00708482	18	6	2009.24	0.603072	1	20	6	9218	0.00786218	0.0249166	19	6.01667	5675.14	3707.43	0.653276	2666	3829	3029	4140	5454	5993	11268	14157	1589	2445	3178	3824	2876	4628	4649	9889	5225.88
675	adenosine-5-monophosphate	0.00267199	0.0105751	24	6	93.5149	0.0660698	0.274912	20	5.99998	532.75	0.00170217	0.00713897	22	6.04999	380.55	127.763	0.335731	364	359	348	348	618	578	486	449	252	309	324	304	200	339	237	447	372.625
677	alanine	0.0065055	0.0205398	24	0	625470	0.141076	0.417288	20	6.55e-05	8.26479e+06	0.00733625	0.023687	22	3.6e-05	7.71908e+06	786778	0.101926	8128859	7747118	8349432	8833769	7508871	8388995	7608877	7585316	6988674	6956777	7249406	6336297	7573630	7742423	8450145	9043674	7.78077e+06
678	alanine-alanine	0.0210199	0.0507729	24	12	18688.1	0.23087	0.584673	24.9858	12	241873	0.0307098	0.0725163	24.4929	12.0049	216193	28381.2	0.131277	206464	181355	141496	217546	207256	239379	238380	202592	252611	216690	252799	245392	199631	225654	217786	221452	216655
680	alpha-ketoglutarate	0.0065055	0.0205398	24	9	12755.5	0.130287	0.39086	20	6	70353.8	0.00684261	0.0224448	22	7.425	52836.1	16052.9	0.303824	53697	24314	44261	45755	75546	64762	80590	60517	61247	54412	38236	56935	28056	40695	45285	49514	51488.9
685	azelaic acid	0.0419656	0.0867083	24	0	623.668	0.294769	0.671713	24.5682	6.63e-05	2025.75	0.0667056	0.140934	24.2841	3.28e-05	1445.61	685.171	0.473965	1889	1898	2092	2224	937	1181	1094	1325	1646	1210	658	317	1884	1549	616	2511	1439.44
688	beta-alanine	0.00421867	0.0149426	24	12	118689	0.105957	0.347555	23.9024	12	407980	0.00389467	0.0143371	23.9512	12.0001	303609	146684	0.483136	148603	166625	213097	275531	504867	276449	282154	401908	415578	475758	288573	452010	296452	242044	203408	210943	303375
689	beta-alanyl lysine	0.0419656	0.0867083	24	12	6212.29	0.427953	0.831254	20	12	43373.8	0.0901494	0.180085	22	12.1	33876.4	8682.73	0.256307	31250	24782	29245	29379	10144	35047	36557	35910	42800	51058	41037	38600	35779	40277	25792	26169	33364.1
691	beta-glycerolphosphate	0.000987235	0.00470192	18	9	498.687	0.257458	0.62367	20	6	1718.25	0.00235808	0.00937669	19	7.6	1177.53	524.424	0.445361	598	234	771	656	2216	1269	1907	1481	1059	1320	587	1236	1184	1042	748	883	1074.44
692	beta-sitosterol	0.0144977	0.0373749	24	6	482.954	0.950893	1	20	6	9823	0.0728457	0.152002	22	6.05	3419.39	5898.5	1.72502	1177	803	736	1480	1810	35245	965	1272	579	321	676	692	471	290	581	1758	3053.5
693	biphenyl	0.0299489	0.066265	18	9	539.346	0.0396169	0.221664	20	5.99999	3048.5	0.00917955	0.0279363	19	7.6	2142.09	705.672	0.329431	1687	1450	1838	1439	3612	2763	3234	2585	1772	2028	1518	1631	1756	1354	1866	1521	2003.38
699	cerotinic acid	0.0419656	0.0867083	24	6	441.765	0.292371	0.671689	21.8859	6	1239.5	0.0662633	0.140352	22.9429	6.01277	782.284	247.929	0.31693	512	1980	557	1028	1653	950	1568	787	427	324	422	419	624	97	844	191	773.938
701	cholesterol	0.000171384	0.00126734	24	6	10013.7	0.0237328	0.211033	20	6	22038.2	5.46e-05	0.000437993	22	6.05	9649	10821.4	1.1215	5457	18065	3538	3542	24973	22518	18041	22621	5840	4360	3456	2359	2189	1971	3008	1706	8977.75
708	cysteine-glycine	8.77e-05	0.000697384	18	9	545.179	0.190764	0.517087	20	6	2181.25	0.000200711	0.00124411	19	7.6	1228.48	832.917	0.678005	593	433	506	489	3683	1777	2407	858	864	1133	915	791	855	652	544	536	1064.75
711	D-erythro-sphingosine	0.00536208	0.0189131	18	9	298.929	0.374135	0.774612	20	6	2029.75	0.0144674	0.0403841	19	7.6	1774.18	279.414	0.157489	1523	1394	1377	1506	2385	1582	2207	1945	1986	1638	1672	1748	1453	1624	1638	1830	1719.25
712	dimethylglycine	0.0144977	0.0373749	18	0	9755.95	0.319521	0.707003	23.7736	17.9999	25562.7	0.0295296	0.0703231	20.8868	18.3505	15682.7	12444.1	0.793496	17727	20648	27249	43361	5690	6362	11608	1635	8305	5055	9893	18230	10004	13082	30338	48827	17375.9
713	ergosterol	0.00980952	0.0282233	24	0	300.697	0.444435	0.856236	24.7059	6.63e-05	1161.25	0.0280562	0.067497	24.3529	3.27e-05	671.64	563.884	0.839563	1273	686	1053	1633	358	323	369	278	521	144	287	311	328	364	572	2146	665.375
716	ethanol phosphate	0.00980952	0.0282233	24	3	15672.8	0.129686	0.390448	26.1721	6.63e-05	54201.4	0.00975369	0.0293656	25.0861	1.56791	38512.2	14441.2	0.374976	70438	35371	65695	45302	45612	50144	51071	31928	31651	28002	18021	24053	27678	26054	18744	43143	38306.7
724	gluconic acid	0.00980952	0.0282233	18	9	8714.56	0.270405	0.642465	25.1282	6.00001	32026	0.0183881	0.0482901	21.5641	7.96552	25745.9	6948.17	0.269875	15195	12438	14791	24316	37563	27469	31865	31207	20121	32444	29618	27768	22137	23161	20696	29121	24994.4
727	glucose-6-phosphate	0.00980952	0.0282233	24	6	2280.07	0.129476	0.390448	24.8451	6.63e-05	10283.5	0.00973992	0.0293656	24.4225	3.05285	8433.46	2332.81	0.276614	8268	10829	12913	9124	8468	9860	10545	11599	4018	6807	8366	7840	7614	6788	4733	7193	8435.31
728	glucuronic acid	0.0419656	0.0867083	24	6	468.812	0.330488	0.719901	21.5648	6	4472.5	0.0732026	0.15237	22.7824	6.01719	3990.17	256.965	0.0643994	4292	3724	4602	4322	4925	4660	4383	3922	2814	3695	3654	4094	3894	3876	2792	4035	3980.25
732	glyceric acid	0.00421867	0.0149426	24	9	23010	0.148058	0.424503	23.9024	6	109381	0.0052332	0.0180803	23.9512	7.49698	89992.2	24797.8	0.275555	64256	54992	85533	94199	112788	104481	105066	115190	88333	97314	94359	133669	79142	56658	59871	93197	89940.5
744	ile-ile	0.00267199	0.0105751	24	12	17931.9	0.0807156	0.298914	24.2975	12	85002.2	0.00203632	0.00829283	24.1488	12.0004	67827.3	22708	0.334791	55297	49503	46500	46301	96318	65213	71760	73051	70493	100224	88960	80332	70157	71991	54358	46554	67938.2
746	inositol-4-monophosphate	0.000987235	0.00470192	18	6	5832.04	0.109426	0.351928	20	6.00001	11242	0.00109467	0.00503476	19	6.01667	5833.74	5420.09	0.929093	1686	1565	3360	6435	9756	9819	12871	12522	1075	1037	280	4080	1736	2879	5288	8442	5176.94
757	leucine	0.000987235	0.00470192	18	0	701084	0.0331711	0.211033	20	17.9999	8.43149e+06	0.000370922	0.00201734	19	18.05	7.76984e+06	776244	0.0999048	8253903	8215279	8683895	9016497	7196317	6708037	6593655	6446635	7773548	8009250	8168718	8224318	8715601	8072796	8323304	8614259	7.9385e+06
759	lignoceric acid	0.0299489	0.066265	24	3	503.637	0.620264	1	28	6.63e-05	3483.74	0.0926187	0.183712	26	1.62503	1696.68	527.656	0.310994	2109	7810	1219	2797	1405	891	1683	1537	895	943	1015	767	1040	738	1442	696	1686.69
763	maleimide	0.0299489	0.066265	24	9	18154.8	0.106566	0.348197	20	6	85638.5	0.0215341	0.0538671	22	7.425	62927.9	20046.3	0.31856	49461	31436	61405	55938	91933	93624	89553	67444	51258	50888	62481	81753	52842	52088	35436	52388	61245.5
770	melibiose	0.0210199	0.0507729	18	9	181.903	0.133233	0.396874	20	5.99998	762	0.0192619	0.0501167	19	7.59999	518.393	189.584	0.365714	345	344	270	350	906	607	658	877	420	484	394	299	521	336	395	492	481.125
773	methionine sulfoxide	0.0419656	0.0867083	24	9	27058	0.27564	0.648807	23.0287	6.00002	197237	0.0631529	0.135122	23.5144	7.47222	167322	31381.4	0.187551	154044	176951	103588	165291	226928	200367	165684	195968	199294	163495	172733	171248	126148	176734	148032	120248	166672
775	methylhexose	0.0144977	0.0373749	24	15	398.631	0.209951	0.549655	23.7736	12	3512.75	0.0206817	0.0526316	23.8868	13.4932	2913	783.535	0.268979	2797	2079	2137	2287	3930	2633	2558	2739	2819	3679	4117	3436	2850	2822	2608	3092	2911.44
792	oxoproline	0.00421867	0.0149426	18	9	1.13782e+06	0.125773	0.383596	23.6461	6	5.7957e+06	0.00453207	0.016289	20.8231	7.8476	4.79671e+06	1.25949e+06	0.262573	2912320	3424531	4268852	3855465	6050991	4828721	4950869	7352232	4974817	6367735	4353893	5311795	4257679	3655867	3134754	4269851	4.62315e+06
799	phosphoethanolamine	0.000987235	0.00470192	18	0	69367.7	0.0806069	0.298914	24.4321	17.9999	161656	0.000830696	0.00395637	21.2161	18.4233	125727	64537.5	0.513312	164999	203027	210896	211215	51224	87854	69734	109983	122778	101443	53647	103363	115665	143283	146607	241071	133549
818	sorbitol	0.000320124	0.00195554	18	9	7823.78	0.226622	0.581191	24.5682	6.00001	23481.2	0.000764015	0.00370152	21.2841	7.92002	17105.3	6812.18	0.398249	11404	8337	9121	5757	31107	24134	25105	13579	17677	20803	17074	17951	15602	17865	12331	12798	16290.3
825	tetracosanol	0.00267199	0.0105751	24	0	291.328	0.353662	0.743484	25.4179	6.63e-05	1105.75	0.00752617	0.0240324	24.7089	3.22e-05	567.852	524.135	0.923013	998	751	630	2044	425	229	312	310	207	93	299	168	401	189	420	1430	556.625
838	uridine	0.00267199	0.0105751	18	12	5715.9	0.0475932	0.229263	24.0327	12	69372	0.00126787	0.00571259	21.0163	12.2524	62019.2	11126.1	0.179397	55800	62855	49612	52833	73378	65407	65519	64976	67101	71417	75049	63921	53795	55279	55564	45961	61154.2
842	xylose	1.91e-05	0.000211771	18	9	272.413	0.0197208	0.211033	20	6.00001	817.75	5.95e-06	8.35e-05	19	7.6	527.581	327.252	0.620288	224	194	221	187	874	824	783	790	515	539	590	517	378	362	179	235	463.25

## Sheet: unique cycling TM in TS
ID	CycID	JTK_pvalue	JTK_BH.Q	JTK_period	JTK_adjphase	JTK_amplitude	LS_pvalue	LS_BH.Q	LS_period	LS_adjphase	LS_amplitude	meta2d_pvalue	meta2d_BH.Q	meta2d_period	meta2d_phase	meta2d_Base	meta2d_AMP	meta2d_rAMP	X0	X0.1	X0.2	X6	X6.1	X6.2	X6.3	X12	X12.1	X12.2	X12.3	X18	X18.1	X18.2	X18.3	TS
9	1684	0.302826	0.582836	24	12	218.142	0.945242	1	24.2229	12	1679	0.64431	1	24.1114	12.0003	1454.52	230.664	0.158584	1210	1091	1244	685	1778	1833	1590	1811	1531	1140	2234	1460	1384	1409	1662	1470.8
10	1702	0.630359	0.989558	18	9	16494.9	0.990098	1	23.1373	6.00005	131674	0.918337	1	20.5686	7.80913	118612	19777.2	0.166739	84573	80826	125102	112860	118555	194452	100827	92880	84968	192356	139618	143326	89499	83258	103832	116462
11	1704	1	1	18	9	782.944	0.999451	1	20	6.00002	8271.75	1	1	19	7.60001	6008.02	1716.56	0.285711	2987	3749	4878	4164	19969	4335	4619	3074	7006	6056	2500	3745	6335	5395	7298	5740.67
12	1708	1	1	18	9	11593.9	0.98731	1	22.7548	12	55610.8	0.999919	1	20.3774	10.4675	47812.3	11101	0.232178	29590	37324	45679	54543	21724	89084	47238	43188	30594	86379	62282	59296	44756	14290	35780	46783.1
13	1713	0.230992	0.479622	24	6	9815	0.785794	1	20	5.99999	111196	0.49125	1	22	6.05	91465.8	20011.6	0.218788	80301	76917	83763	92841	136356	124373	91213	78953	55635	124333	75369	104774	78923	77566	73940	90350.5
17	1735	1	1	18	6	29779.4	0.918847	1	20	6.00002	232275	0.996614	1	19	6.01667	181766	53585.5	0.294804	147032	128083	180397	159444	381468	259041	129148	139026	105908	262333	160894	190457	130450	128960	141754	176293
23	1771	0.785464	1	18	15	1130.31	0.998377	1	20	12	5257.5	0.97483	1	19	13.6167	4508.36	1257.68	0.278966	4691	4941	5689	3971	2439	3143	4360	4049	5947	4013	7021	1538	2817	5550	7523	4512.8
27	1830	0.391617	0.708441	24	9	7281.26	0.86456	1	20	6	102806	0.705257	1	22	7.425	78562.4	19745.9	0.25134	65441	59698	67969	71511	168636	107472	63605	65395	49520	113742	68018	83842	58247	59503	59639	77482.5
30	1967	1	1	18	15	4360.02	0.999946	1	20	17.9999	34359.2	1	1	19	16.4666	33208.5	2900.81	0.0873513	41419	38423	28949	28145	29972	32940	31324	40190	21737	38949	34679	42095	37229	35613	22500	33610.9
43	2153	0.391617	0.708441	18	6	9264.51	0.534361	1	20	6.00002	64309	0.536588	1	19	6.01668	54260.7	9868.03	0.181863	57493	44872	49644	59689	81557	51188	64802	57891	36238	53262	38191	51451	50854	49172	52487	53252.7
45	2193	0.391617	0.708441	18	9	455.377	0.336208	1	20	5.99999	2701	0.398615	0.886629	19	7.59999	1644.69	816.843	0.496655	834	1006	954	3504	612	3231	3457	1232	818	1270	1267	1176	742	1172	1487	1517.47
53	2568	0.785464	1	18	12	339.765	0.9003	1	20.2948	12	6472	0.952187	1	19.1474	12.0433	4936.82	1798.29	0.364261	3466	3424	3978	4701	3385	8951	4162	3386	3518	11584	7400	5373	3470	3080	2072	4796.67
62	3026	0.230992	0.479622	24	9	3632.58	0.784349	1	23.1373	6.00002	17802.5	0.490681	1	23.5686	7.47506	13975.8	5147.93	0.368346	10789	6934	14719	12340	18785	28639	11446	12084	10196	26993	17754	15940	7976	5086	10549	14015.3
66	3122	0.173703	0.382327	18	6	49702.9	0.950848	1	20	6	909733	0.462596	0.987663	19	6.01667	337320	595992	1.76685	45288	33395	14065	144265	3266078	42935	185653	60490	18024	31290	58103	32091	53164	83753	78056	276443
71	4219	0.173703	0.382327	18	9	1635.54	0.41143	1	20	6	12849.8	0.260033	0.644729	19	7.6	7788.41	3783.49	0.485784	4274	4778	5153	21278	7405	5872	16844	7527	4638	3595	5430	5406	3873	5069	6845	7199.13
77	4541	0.173703	0.382327	18	6	2929.19	0.562813	1	20	6	10731	0.325081	0.754939	19	6.01667	6001.43	5002.41	0.833536	3128	4815	1729	8753	21416	3346	9409	5134	3490	1984	2146	4873	3844	5102	3188	5490.47
86	4818	1	1	18	6	5444.72	0.709875	1	20	6.00001	86117.5	0.953125	1	19	6.01667	77907.3	7862.47	0.100921	80606	71455	74800	74693	103081	74828	91868	80485	70862	77343	65183	82534	75224	66697	66904	77104.2
91	4929	1	1	18	9	3697.11	0.998916	1	23.0084	12	20469.2	0.999999	1	20.5042	10.473	17734.9	3042.36	0.171547	14049	14002	13691	19699	7527	29487	16553	11636	13423	36479	20339	20856	13936	13974	16379	17468.7
95	7490	0.630359	0.989558	24	0	610.94	0.999932	1	20	5.99998	4184.5	0.921228	1	22	3.29999	3170.11	3063.13	0.966252	2294	2088	2697	4977	1251	908	9602	1566	1300	1076	1403	1554	1606	11034	2656	3067.47
96	7826	1	1	18	6	195.692	1	1	20	6	4903.5	1	1	19	6.01667	4695.36	269.861	0.0574739	4580	4163	4516	4451	5931	4054	5178	4821	3573	4751	5020	5839	4720	4958	3462	4667.8
100	11481	1	1	24	18	443.002	0.979141	1	20	6	66744.2	0.999781	1	22	11.55	20806.2	6884.69	0.330896	2415	3967	3570	3664	257450	3896	1967	3516	3844	4158	4646	4486	3788	4578	5286	20748.7
106	14806	0.967668	1	18	6	1556.34	0.781736	1	20	6.00001	4322	0.967593	1	19	6.01667	2948.62	1529.43	0.518693	1811	1978	1940	6404	653	5436	4795	1531	1385	3891	2765	3070	2066	1760	2401	2792.4
111	16747	0.630359	0.989558	24	12	1505.43	0.883319	1	22.5068	12	10028.8	0.882838	1	23.2534	12.0124	8588.83	1878.75	0.218743	7648	5620	8516	7245	8255	9063	12623	8660	6610	12204	12641	6964	6534	6910	10491	8665.6
124	17537	0.0937853	0.238855	18	9	314.839	0.568482	1	20	5.99999	1804.5	0.209611	0.555666	19	7.59999	1519.56	338.724	0.22291	1427	1232	793	1106	1893	2134	2085	1495	1291	1890	1470	1254	1120	1558	1254	1466.8
130	18266	1	1	24	0	129.931	0.999938	1	20	12	2249.75	1	1	22	17.6	2166	270.81	0.125027	2393	2211	2582	2555	624	1369	2998	2214	2276	1880	2629	2401	2558	1556	2473	2181.27
131	18318	1	1	18	3	1661.17	0.999628	1	23.1373	6.63e-05	39362.3	1	1	20.5686	1.71408	37414	3303.41	0.0882935	43195	35286	39606	43282	18198	38943	42292	39970	23073	44774	32811	44172	38558	41759	37506	37561.7
134	18520	1	1	18	6	3586.27	1	1	27.082	12	40607.5	1	1	22.541	8.75078	40032.9	956.44	0.0238914	40871	36751	36505	47792	16773	43631	54123	49941	33621	44437	34431	40844	39397	36019	45049	40012.3
140	21704	1	1	18	9	4273.58	0.994313	1	20	6	16430.8	0.999984	1	19	7.6	11897.4	4405.44	0.370286	7215	6601	3093	30023	7030	22818	5852	15438	1067	11692	12752	13172	8976	13044	9396	11211.3
141	21811	1	1	18	12	3563.99	0.995836	1	20	12	36705.2	0.999991	1	19	12.0333	32496.5	3170.55	0.0975658	35419	31070	33824	4904	3686	43055	48151	42023	31350	40256	33192	38267	34651	30527	33201	32238.4
146	31544	0.230992	0.479622	24	0	4142.94	0.978442	1	24.5104	17.9999	14051.2	0.56213	1	24.2552	21.0339	13428.8	3573.28	0.266091	20503	17502	16156	14492	1310	11216	14294	10724	8609	10480	16868	17591	1780	14605	22229	13223.9
148	31695	0.266909	0.551481	18	3	150.967	0.907784	1	20	6.98e-05	748.999	0.585773	1	19	1.58337	612.481	184.463	0.301174	601	677	969	457	757	463	711	385	413	463	558	734	174	964	1202	635.2
151	33415	0.302826	0.582836	24	18	15347.8	0.451526	1	20	17.9999	79996.2	0.408796	0.904879	22	18.15	67817	14849.5	0.218964	69209	76982	72544	79272	28617	41566	31561	94414	91233	53285	70969	50294	81152	94309	94230	68642.5
155	34059	1	1	18	0	3669.53	0.987155	1	20	17.9999	39242.5	0.999917	1	19	18.05	35768.7	4425.95	0.123738	46399	36520	39599	38805	7524	38714	39992	41490	30533	39778	31384	41747	38952	37928	38343	36513.9
160	42007	1	1	24	18	3513.26	0.97332	1	22.2642	12	27385	0.999641	1	23.1321	14.9084	24050.2	4903.35	0.20388	19300	22725	22852	32588	3819	24533	21658	32979	31334	21498	23729	29758	22576	22817	31712	24258.5
164	46122	0.785464	1	18	9	1776.96	0.904647	1	20	5.99999	23312.8	0.953362	1	19	7.59999	21218.8	2301.16	0.108449	20296	18086	19098	26204	17204	19882	29961	24413	19411	20654	20473	16491	20018	20275	20440	20860.4
166	46141	0.302826	0.582836	24	18	21498.9	0.835105	1	26.9055	18	87668.9	0.600565	1	25.4528	18.0588	62170.1	19124.9	0.307623	30407	75763	42794	42914	25830	17480	74362	90300	101666	27718	44970	33075	65161	111685	140755	61658.7
168	46292	0.302826	0.582836	24	18	742.109	0.981505	1	20	6	66079.2	0.657838	1	22	11.55	20627.7	6884.9	0.333769	2702	3967	3570	1242	257450	3220	2405	3857	3753	4158	4646	5091	3043	4578	4872	20570.3
174	62250	0.630359	0.989558	24	9	11898.5	0.999973	1	21.7942	6	74973.5	0.92124	1	22.8971	7.44502	66478.2	7799.22	0.11732	54558	56913	77600	99804	8381	88901	102808	55884	73948	65588	73532	50642	56150	51246	78928	66325.5
176	62311	0.967668	1	18	12	500.632	0.969487	1	24.2229	12	7827.75	0.998046	1	21.1114	12.2664	6291.12	2237.64	0.355683	10770	1491	5029	9251	1062	9128	9235	10051	4616	9744	6900	3600	4560	5098	3087	6241.47
180	62834	0.785464	1	18	15	1307.26	0.991081	1	23.0084	17.9999	7102.74	0.973415	1	20.5042	16.5638	5202.06	1606.24	0.308769	3622	4926	7011	3656	1217	3427	5108	6426	7374	4923	4161	1822	4436	4906	17247	5350.8
183	64551	1	1	18	15	1307.26	0.999936	1	20	12	28597.8	1	1	19	13.6167	27690.3	1341.09	0.0484316	30686	25782	26555	27530	21606	24143	31490	34048	25887	28677	25779	33371	29795	25091	24986	27695.1
187	64604	0.785464	1	24	9	466.69	0.99804	1	23.3994	6	4928.25	0.974765	1	23.6997	7.48219	4151.33	698.954	0.168369	4145	3849	3990	6095	757	5819	7042	4290	4057	4672	4050	5020	783	3419	4419	4160.47
188	64612	0.230992	0.479622	24	9	1278.98	0.500357	1	20	5.99999	11602.8	0.364974	0.829308	22	7.42499	9515.01	1522.85	0.160047	9072	7491	8958	10365	15107	11059	9880	9717	6623	11120	8126	10163	8482	7487	7826	9431.73
192	64643	1	1	18	6	580.181	0.997542	1	20	6.00001	7735.25	0.999997	1	19	6.01667	6873.04	930.444	0.135376	7449	5367	6124	6396	10716	6688	7141	7742	4287	8847	5494	7835	5926	4636	7022	6778
193	64666	0.230992	0.479622	18	9	1670.54	0.569324	1	20	6	7618.5	0.398299	0.886629	19	7.6	5432.76	2029.95	0.37365	4114	4289	1291	8576	2769	8786	10343	4942	3597	5755	4735	5127	4305	4137	3983	5116.6
194	64668	1	1	18	3	3016.34	0.999868	1	20	6.63e-05	38572.3	1	1	19	1.58336	36708.5	3136.72	0.0854494	42460	35161	38096	43881	19872	40444	44304	39052	22960	42216	30760	43077	37825	40501	35814	37094.9
195	64736	1	1	24	12	476.236	0.997792	1	20	6.00002	7034	0.999998	1	22	8.80001	6382.96	541.917	0.0849006	6099	5555	6200	8154	4242	6776	8964	7350	5477	6751	6195	7407	6728	5525	3953	6358.4
196	64742	0.630359	0.989558	24	3	768.625	0.578147	1	20	6.00001	7985.75	0.732304	1	22	4.675	7208.72	954.82	0.132453	7813	6747	7809	7656	7011	8462	8814	6570	4461	7997	6071	7876	6662	6340	7150	7162.6
204	66305	0.0672083	0.182763	18	9	8683.62	0.393535	1	20	6	75654.8	0.122525	0.370211	19	7.6	67744.4	8827.11	0.1303	64636	56022	55521	67840	80714	78602	75463	73015	59782	80868	56776	68394	59662	62562	55687	66369.6
208	68356	1	1	18	9	496.389	0.991275	1	20	5.99999	4673	0.999962	1	19	7.6	4168.37	548.976	0.1317	4157	2945	3463	3863	5011	6366	3452	3372	2939	5098	5024	4540	3437	4003	3573	4082.87
212	84221	0.630359	0.989558	18	9	22457.4	0.927624	1	20	6.00002	151388	0.898502	1	19	7.60001	67732.5	68987.2	1.01852	10156	639	21430	25644	480369	94195	5346	11658	18357	81622	32074	44404	324	18513	10087	56987.9
213	84566	1	1	24	18	60.8112	0.880398	1	27.4419	17.9999	1039	0.992544	1	25.7209	18.0809	863.893	133.106	0.154077	748	934	739	433	802	895	850	918	882	691	849	852	678	1446	1180	859.8
221	95422	0.173703	0.382327	24	15	1096.72	0.330827	1	20	12	9056	0.22162	0.579933	22	13.475	6441.19	3139	0.487333	2759	6130	5771	5879	4465	4794	7136	6599	10364	6658	12603	6945	6896	4417	6238	6510.27
222	95438	0.0672083	0.182763	18	9	1127.13	0.357389	1	20	6.00001	5234	0.113586	0.34693	19	7.60001	3309.1	1589.5	0.480343	1170	1062	2851	7058	6065	3716	4097	1312	2575	2166	3832	2190	1149	4558	2122	3061.53
234	102337	1	1	18	6	703.571	0.9995	1	20	6	4910.5	1	1	19	6.01667	4208.83	801.127	0.190344	2162	4359	4333	4949	1514	7301	5878	3411	3291	5082	4099	4675	3522	2777	4552	4127
237	103821	0.302826	0.582836	18	9	1660.99	0.769394	1	20	5.99999	6929.5	0.572404	1	19	7.59999	5157.95	2200.64	0.426651	2734	2853	3514	4061	13236	7706	2715	3701	5611	7964	4711	4429	3061	1589	4343	4815.2
240	104135	1	1	24	21	493.914	0.999998	1	20	12	28393.5	1	1	22	16.225	26537.4	3740.36	0.140946	30068	27919	27051	31775	4387	26331	31971	32450	26265	29081	25778	31390	14553	30362	31612	26732.9
241	104994	0.967668	1	18	6	3343.91	1	1	20	6	39026	0.999472	1	19	6.01667	36990.9	2259.4	0.0610799	39342	34227	32755	46527	17003	39006	53568	35765	29560	33277	37846	44430	37174	38194	32728	36760.1
253	106482	0.785464	1	18	9	1105.03	0.995011	1	20	5.99998	3731.25	0.974182	1	19	7.59999	3003.27	910.067	0.303025	1610	1788	1819	4002	690	5094	5139	1584	2300	3147	5014	2380	1223	2329	4804	2861.53
254	106522	1	1	18	15	1559.7	0.979524	1	22.3848	18	7290.49	0.999789	1	20.1924	16.532	5504.13	1721.06	0.312686	4546	5390	8344	4947	2090	2248	5969	6151	8234	3100	5000	3012	5168	5940	15042	5678.73
255	106742	1	1	18	9	235328	0.99999	1	20	6.00001	1.81662e+06	1	1	19	7.60001	1.60678e+06	236630	0.14727	1523418	1278354	919860	1062766	3033118	1746712	1423875	2223929	1875665	837842	1309427	1576882	1991672	1539750	1205589	1.56992e+06
264	110031	0.785464	1	18	9	1326	0.38602	1	20	5.99999	8253.25	0.665033	1	19	7.6	5404.84	2137.47	0.395473	3796	4089	2624	10938	3222	11601	7252	3830	3285	4564	4127	3788	3620	3918	5425	5071.93
265	110123	1	1	18	6	2560.79	1	1	20	12	26063	1	1	19	8.86666	25309.9	633.251	0.0250199	27819	23960	23489	31592	3188	31177	35225	27707	23641	29425	23479	24899	23737	22365	26341	25202.9
266	110125	1	1	24	18	493.914	0.989947	1	20	17.9999	14463	0.999949	1	22	18.15	13239.4	1473.48	0.111295	15734	12783	12988	14541	2234	12632	15453	15559	11338	15724	12982	13929	13777	14015	16131	13321.3
267	110131	1	1	24	0	17080.9	0.897533	1	21.1253	17.9999	128516	0.994561	1	22.5627	20.8936	111670	18424.8	0.164993	131602	126999	117335	118426	19108	82390	140927	144220	80496	104113	98373	140898	130777	127394	114996	111870
268	110134	1	1	18	3	7788.78	0.991125	1	20	6	77652.5	0.99996	1	19	4.43333	74207.4	5657.64	0.076241	81285	75022	72939	86367	73807	57296	93140	81080	62358	67734	61006	81914	78191	72806	66369	74087.6
272	110359	0.785464	1	24	6	11444.9	0.901521	1	25.8934	6	136597	0.952519	1	24.9467	6.00865	125571	5415.52	0.0431271	148012	123273	133156	130102	170563	108496	137228	144294	97560	118020	118501	99418	96923	124070	136381	125733
273	110371	0.173703	0.382327	18	6	2481.94	0.500361	1	20	6	10935	0.299231	0.712575	19	6.01667	7121.22	3841.88	0.539498	5594	5468	5371	11936	7353	18677	5774	3786	4061	9237	3774	7182	4039	3078	5602	6728.8
280	110962	1	1	18	6	711.703	0.981869	1	20	5.99998	5252	0.999835	1	19	6.01666	3468.74	1948.35	0.561688	2158	1591	2955	7148	969	1299	11592	4766	2928	1049	2102	1434	2632	2771	3652	3269.73
289	113563	1	1	18	9	619.072	0.999931	1	20.0973	12	6743.75	1	1	19.0487	10.4491	6088.9	338.041	0.0555176	6286	5443	5225	6174	1002	7211	7725	8621	5760	6084	6510	7769	7030	5659	4110	6040.6
291	117195	0.967668	1	24	18	6309.69	0.972431	1	20	17.9999	78241.5	0.998224	1	22	18.15	67977.6	13382.7	0.19687	78728	77817	68314	83645	15871	18343	86870	41279	87382	89662	69945	91554	86463	87465	47484	68721.5
298	117769	0.0672083	0.182763	24	6	2204.05	0.180291	0.99337	20	6	50697.5	0.0655914	0.220293	22	6.05	17654.2	31887.5	1.80622	3335	3290	2975	37801	104161	33615	27213	4322	2728	3363	2626	3302	2346	4844	2233	15876.9
299	117790	0.230992	0.479622	18	9	102.354	0.292385	1	20	5.99999	516.25	0.249559	0.620584	19	7.59999	293.873	175.535	0.597316	151	205	81	811	442	188	624	291	200	72	222	111	121	293	186	266.533
301	118125	1	1	18	6	198.167	0.973237	1	20.0973	6	1441.75	0.999639	1	19.0487	6.01824	1177.64	231.114	0.196252	1420	1082	1009	2205	1370	1453	739	1170	675	898	1283	1176	241	1073	1517	1154.07
302	118602	1	1	18	6	1028.49	0.960845	1	20	6	9859.75	0.999223	1	19	6.01667	6120.12	3853.31	0.629613	3872	4037	4807	17153	445	2420	19421	7664	5855	1600	618	2233	4727	4671	6375	5726.53
308	119060	0.0937853	0.238855	18	9	5170.54	0.829716	1	20	6.00002	16077.8	0.27651	0.67761	19	7.60001	10224.5	6357.59	0.621798	3453	3554	5429	12984	850	36468	14009	7082	6334	18248	8432	8368	3925	4157	5222	9234.33
311	120929	0.707912	1	18	12	246.603	0.825771	1	20	12	1676.25	0.898415	1	19	12.0333	1330.59	382.377	0.287373	1054	924	1268	1219	739	2075	1242	984	1397	2375	1949	1419	924	920	1003	1299.47
312	120954	1	1	18	3	3863.1	0.966572	1	20	5.99997	35170.8	0.999435	1	19	4.43332	33346.5	3216.95	0.0964705	40178	29685	35406	39843	31523	25728	43589	36552	25683	29962	25939	35996	34477	30898	33717	33278.4
314	120986	1	1	18	6	6464.72	0.999999	1	20	5.99999	38608	1	1	19	6.01666	35432.1	4366.46	0.123235	31206	31959	28332	44205	8826	56322	45079	35566	26636	46338	34028	43858	34372	30147	27917	34986.1
316	121468	1	1	18	6	21.39	1	1	27.6254	6.63e-05	1166	1	1	22.8127	3.80215	1179.29	19.8175	0.0168046	1250	1084	1164	1195	1967	1260	228	1312	1070	1271	935	1117	1261	1087	1476	1178.47
322	124976	0.0672083	0.182763	18	6	1216.93	0.279177	1	20	6	6352.25	0.0933623	0.298123	19	6.01667	3076.82	3404.55	1.10652	1036	1277	1707	11176	3816	8415	2002	1092	1868	839	1381	928	1641	1504	2254	2729.07
329	125886	0.128655	0.302951	24	9	59.397	0.0382222	0.670731	20	6	317.25	0.0310537	0.121196	22	7.425	172.56	95.573	0.553854	148	112	68	392	301	282	294	117	146	119	77	100	121	142	91	167.333
336	126582	0.128655	0.302951	24	6	299.106	0.498889	1	20	6	2376.25	0.240436	0.610659	22	6.05	1143.58	1127.53	0.985971	1247	300	753	5028	917	716	2844	565	755	687	247	501	414	503	734	1080.73
339	128047	0.785464	1	24	0	2858.83	0.993615	1	20	6	21723.5	0.973911	1	22	3.3	19269.4	8953.21	0.464633	23556	6135	24110	23369	30436	13029	20060	18484	6824	23111	5108	23222	22780	20221	24096	18969.4
342	130528	0.173703	0.382327	24	6	1055.71	0.333395	1	20.2948	6	4878.25	0.222892	0.579933	22.1474	6.04228	3649.85	894.248	0.245009	2399	3864	5103	5839	4662	3356	5656	2644	1411	3617	3778	3497	2516	2812	2896	3603.33
343	130541	1	1	24	0	2108.95	0.998248	1	22.2642	6.63e-05	28416.3	0.999998	1	23.1321	3.44e-05	26808.4	2463.23	0.0918829	29814	24965	30470	23483	19898	24346	35476	27554	16654	26765	28561	30936	26977	27781	27204	26725.6
348	130599	1	1	18	3	13243.8	0.999999	1	20	6	105362	1	1	19	4.43333	101802	9400.04	0.0923364	114973	107122	92411	143684	38724	78600	160439	128954	71336	86626	75448	110312	114137	97798	103482	101603
352	130801	0.128655	0.302951	18	6	489.318	0.449808	1	20	6	2866.75	0.222774	0.579933	19	6.01667	2256.41	642.335	0.284671	1951	1906	1868	2587	3946	2522	2412	1767	1551	2621	1754	2143	1541	1878	2415	2190.8
358	131471	1	1	18	0	1132.79	1	1	28	12	7111.75	1	1	23	4.92857	6806.3	1557.58	0.228844	9201	7471	8628	9192	2613	3181	9183	8367	7311	6734	6035	8384	7180	1673	7802	6863.67
359	131496	0.499941	0.841218	24	9	566.039	0.854653	1	20	6	4789.25	0.7906	1	22	7.425	3075.42	1212.18	0.394149	2794	2411	2147	3957	10259	2991	1950	2349	3899	920	3068	2692	2221	1512	1967	3009.13
367	133808	0.967668	1	24	15	1852.27	0.919204	1	28	17.9999	11150.7	0.993655	1	26	16.4821	10001.3	2245.9	0.224561	5504	3242	10392	5827	7253	14136	13748	11832	6806	15169	10773	13513	11167	10250	9673	9952.33
374	160854	0.230992	0.479622	18	9	6217.59	0.164735	0.971476	20	6	104475	0.162438	0.464232	19	7.6	49929	39459.3	0.790309	21763	20592	18569	144590	16420	127901	128988	24958	13393	26221	22965	24544	21362	21040	23443	43783.3
376	161387	1	1	24	6	501.162	0.996616	1	28	6.63e-05	3449.66	0.999994	1	26	3.25003	2879.92	195.217	0.0677855	3819	2867	3663	3947	1180	3699	3004	3045	2912	3056	1964	3087	2902	1186	2955	2885.73
390	170728	1	1	24	18	1840.6	0.999154	1	22.6301	12	33802.5	1	1	23.3151	14.9247	29855.2	5472.25	0.183293	10358	31826	37705	35277	2465	31312	35697	38812	35754	31112	29532	19760	31366	37214	43195	30092.3
391	170736	1	1	18	6	357.089	0.992588	1	20	5.99999	3296.25	0.999972	1	19	6.01666	2999.69	314.169	0.104734	2785	2218	3474	2752	2936	4003	3494	2761	2097	3534	3340	3357	2363	2604	2796	2967.6
392	170766	1	1	18	3	1950.2	0.995723	1	20.806	6.85e-05	27875.7	0.999991	1	19.403	1.61695	26247.6	1802	0.0686539	29975	23656	29996	26247	21286	28248	28969	25082	17881	30432	25119	28265	27001	25778	28543	26431.9
393	170791	1	1	18	6	3739.53	1	1	20	12	58337.8	1	1	19	8.86667	55251.2	2520.28	0.0456148	56905	48264	52117	58085	31579	68349	61443	54655	36477	52089	90130	51646	52617	52133	55894	54825.5
398	187301	1	1	18	0	4114.12	0.999887	1	23.6676	6.63e-05	57367.3	1	1	20.8338	2.92e-05	52873.9	3476.34	0.0657477	61040	54793	56269	58607	28706	45551	70948	56976	50258	52725	42163	60327	55045	51211	52409	53135.2
399	187303	1	1	18	6	3483.92	0.999064	1	20	6	32679.5	1	1	19	6.01667	29866.1	2673.42	0.0895136	29660	28225	29468	32608	23666	36285	38159	28989	14116	38603	24093	36107	30025	28945	24946	29593
400	187304	0.302826	0.582836	18	6	11378.1	0.553193	1	20	5.99998	73636.2	0.466822	0.991262	19	6.01666	62535.7	12511.8	0.200075	59524	52982	48457	75415	82036	55234	81860	65022	47618	55720	57979	66868	59083	61038	50030	61257.7
403	187855	0.0672083	0.182763	24	21	2324.79	0.754844	1	20	4.78e-05	3275	0.201974	0.53711	22	20.625	2808.23	1513.33	0.538892	2952	5347	1526	943	6295	852	1391	1296	1246	1187	1431	4705	2270	4983	6522	2863.07
408	209676	0.128655	0.302951	18	9	2051.67	0.357428	1	20	6	8963.25	0.187593	0.512399	19	7.6	6165.32	2559.14	0.415086	4551	4017	3526	11942	9283	3934	10694	6512	5141	3214	7040	5455	4814	933	5445	5766.73
409	209677	0.499941	0.841218	24	9	320.319	0.713532	1	23.804	6	801.5	0.724433	1	23.902	7.49398	483.853	299.114	0.618192	116	922	213	472	698	1627	409	957	95	753	417	251	136	142	146	490.267
415	210345	1	1	18	6	232.638	0.999999	1	20	5.99998	5037	1	1	19	6.01666	4781.66	336.711	0.0704173	4580	4218	4477	4451	5931	4588	5178	4821	3573	4869	4829	5839	4720	4958	4177	4747.27
419	210841	0.785464	1	18	6	690.136	0.999999	1	20	6	4814.75	0.975138	1	19	6.01667	4296.32	618.653	0.143996	4310	3505	3499	4619	1429	6538	6673	4606	1988	4492	3781	4821	3739	4568	4929	4233.13
422	210890	0.445779	0.804693	18	0	520.431	0.999564	1	27.4419	12	4193.5	0.805781	1	22.7209	4.96779	4146.81	915.98	0.220888	5614	4358	5181	4162	1667	3936	4934	4358	3622	4557	4237	4476	4638	2610	4416	4184.4
425	211140	1	1	18	9	2945.98	0.999948	1	23.0084	6.00002	23541.2	1	1	20.5042	7.79954	22101.7	2366.56	0.107076	19839	19013	21401	24888	24731	32071	12475	20403	11918	37456	24074	23092	16257	16627	23341	21839.1
434	215775	0.11122	0.282406	18	0	515.834	0.593106	1	20	17.9999	1865.75	0.245301	0.615801	19	18.05	1539.95	427.951	0.277899	2128	1683	2343	1351	839	1843	734	1479	1256	839	2222	1970	1425	1760	2308	1612
439	223071	1	1	18	6	190.919	0.685698	1	20	5.99999	981.25	0.944424	1	19	6.01666	670.7	337.767	0.503603	563	437	380	1435	282	832	1376	588	561	465	408	428	431	728	629	636.2
442	223087	0.630359	0.989558	18	9	1294.36	0.817497	1	20	5.99999	12488.8	0.856958	1	19	7.59999	7230.14	4049.32	0.560061	2257	4633	3862	8757	3140	28832	9226	6133	3423	3478	5709	3764	4689	5321	5768	6599.47
443	223096	0.0937853	0.238855	18	6	711.349	0.170144	0.986093	20	6	3317.5	0.081985	0.264802	19	6.01667	2078.89	1226.59	0.590023	1774	1546	1507	4510	2390	2024	4346	2051	1421	794	1260	1611	895	1389	1786	1953.6
446	223126	0.391617	0.708441	18	6	1249.46	0.800751	1	20	6.00002	3655.25	0.677248	1	19	6.01668	2424.91	1463.72	0.603618	1333	1768	503	4235	1474	3865	5047	687	1672	1922	2162	1720	1462	2837	3444	2275.4
448	223135	1	1	24	15	1174.5	1	1	20	12	29188.5	1	1	22	13.475	28704	726.483	0.0253095	32325	28070	27023	27712	23458	27641	32691	34460	25474	30283	26537	34244	29971	25421	25490	28720
456	224095	0.391617	0.708441	18	9	667.862	0.25931	1	20	5.99999	2524	0.333816	0.772497	19	7.59999	1409.9	874.248	0.62008	579	764	573	3203	3537	2707	649	1438	515	724	927	532	852	1075	1031	1273.73
458	224100	0.128655	0.302951	18	6	2880.58	0.179749	0.99337	20	6	9266.5	0.110236	0.340398	19	6.01667	4366.04	5058	1.15849	1840	2100	1700	6351	17493	7815	5407	1733	1559	2255	1987	1883	1992	1725	1901	3849.4
465	228291	0.302826	0.582836	18	6	2809.69	0.809871	1	20	6	22786.5	0.589943	1	19	6.01667	20276.8	2591.92	0.127827	19440	19150	18393	20929	23562	23287	23368	19819	12975	23946	18097	22323	19155	19935	15802	20012.1
466	228300	0.967668	1	18	6	5221.1	0.982249	1	20	6	65413.8	0.998754	1	19	6.01667	60466.4	4604.96	0.0761574	66880	54395	57084	60416	72489	64190	64560	61847	40115	72313	45290	62456	52827	61392	63686	59996
469	228316	0.0937853	0.238855	24	12	1112.1	0.706796	1	23.1373	12	6653.5	0.246174	0.615801	23.5686	12.004	5590.74	1652.48	0.295575	5010	4463	4942	6591	5037	8936	5797	6007	5045	8708	6854	6539	5288	1112	4813	5676.13
470	228318	0.785464	1	24	21	2745.34	0.933337	1	23.0084	17.9999	20275.5	0.960709	1	23.5042	19.477	18262.8	2573.03	0.140889	21632	20359	17865	20351	10897	12938	21248	20419	11285	16274	19245	23655	20695	21071	15681	18241
472	228360	0.967668	1	24	6	19169.1	0.900192	1	23.5328	5.26e-05	64609.7	0.991309	1	23.7664	2.97082	50181.7	18951.8	0.377663	38799	49839	105191	65184	57253	40907	84957	23118	13974	86787	18069	10878	46738	50319	47387	49293.3
477	229314	1	1	18	9	1006.57	0.998926	1	20	6.00001	22663	0.999999	1	19	7.6	21382.1	1451.92	0.0679033	20441	19554	19605	25546	17204	18529	29373	24683	20368	19472	21003	20451	20300	20314	20497	21156
478	229362	0.967668	1	18	6	4246.88	1	1	20	5.99999	31310.5	0.999472	1	19	6.01666	28708.1	3340.28	0.116353	28469	24642	22949	35978	17367	37119	34778	31416	19503	36603	16447	34558	28077	29217	28380	28366.9
479	229423	0.302826	0.582836	18	6	4454.42	0.842557	1	20	6	59134.8	0.603658	1	19	6.01667	51313.7	7857.2	0.153121	50654	46518	46815	49369	80328	54395	52447	44795	34828	60103	46299	53486	44835	45941	46854	50511.1
481	232329	0.499941	0.841218	18	6	2464.44	0.513289	1	20	6	20090.2	0.605656	1	19	6.01667	17569.4	2084.22	0.118628	18798	16452	18308	18902	24371	16063	21025	17358	9447	17504	12739	19784	15702	17147	16748	17356.5
483	232331	0.302826	0.582836	18	6	5835.4	0.854443	1	20	6.00001	54943.5	0.608549	1	19	6.01667	43478.9	11507	0.264657	41230	36127	38458	46088	89229	37842	46615	37740	20223	42877	33683	52324	38562	40806	32749	42303.5
485	232366	1	1	18	6	422.85	0.999999	1	20	5.99999	6641.75	1	1	19	6.01666	6144.46	657.851	0.107064	6378	6447	3531	6481	2932	9084	8070	6387	4133	8601	5694	4412	6406	5925	6678	6077.27
498	342012	1	1	18	6	986.414	0.52234	1	20	6	4473.5	0.861567	1	19	6.01667	2753.61	1809.96	0.657306	1661	1723	1940	6786	345	5683	5080	1531	1385	2246	2528	2233	2066	1514	1810	2568.73
499	342074	0.499941	0.841218	24	18	23111.4	0.875563	1	23.942	17.9999	108649	0.799362	1	23.971	18	75101.3	33482.2	0.445828	41711	88690	94145	54427	6963	17019	86107	104715	124037	29195	45231	30813	75139	133043	195603	75122.5
503	342950	1	1	24	18	95555.9	0.985474	1	22.8809	17.9999	516258	0.999894	1	23.4404	18.0102	412905	103130	0.249768	323814	440510	484510	323845	280076	134746	455671	581304	633450	182324	308520	151650	409555	634348	869481	414254
511	345862	0.128655	0.302951	24	18	1354.82	0.416649	1	20	12	7988.75	0.210457	0.55616	22	14.85	6713.38	3278.46	0.488347	8903	5340	7780	6733	445	5262	4635	10981	7070	7243	6661	9526	7979	7269	6850	6845.13
515	350642	1	1	18	3	366.812	0.999991	1	20	12	21816.5	1	1	19	7.28335	21161.7	841.23	0.0397525	21777	21345	21672	21093	11592	22726	24625	24667	20559	21034	21006	24766	22963	20310	19158	21286.2
523	355637	0.967668	1	18	6	539.522	1	1	20	6.00001	4980.25	0.999472	1	19	6.01667	4576.11	484.069	0.105782	4377	4056	4060	6371	757	6167	6626	4672	3753	4813	4050	5250	4566	3846	4536	4526.67
524	355700	0.967668	1	24	18	2694.78	0.975863	1	28	17.9999	12571.2	0.99842	1	26	18.1071	10331.9	572.468	0.0554081	8184	9040	7120	3975	15062	12001	4718	15978	10990	5250	12077	15126	14047	14593	6519	10312
525	355819	0.499941	0.841218	18	6	526.441	0.993902	1	20	6.63e-05	5640.33	0.84441	1	19	3.1667	5182.66	914.666	0.176486	6211	5280	5430	6914	1518	5641	7402	4901	3052	5401	3896	6390	6084	5267	5023	5227.33
526	355856	0.230992	0.479622	18	6	1762.46	0.654208	1	20	6	7177	0.436683	0.946333	19	6.01667	5639.91	1634.7	0.289846	6203	5232	2680	6755	6651	7217	8085	5270	2694	6799	2897	6196	5034	4943	5438	5472.93
529	357025	0.302826	0.582836	18	6	911.461	0.641381	1	20	6	3924	0.512512	1	19	6.01667	3214.19	822.267	0.255824	3206	1966	2569	4091	3366	4576	3663	3168	1970	4327	2502	2727	2565	3198	3059	3130.2
547	378571	0.302826	0.582836	24	12	972.272	0.975176	1	22.7548	12	3541	0.655507	1	23.3774	12.0085	2595.23	1341.62	0.516956	899	936	3295	2329	1347	7686	1692	1415	2492	5562	4695	3338	1058	1188	1904	2655.73
551	379096	0.302826	0.582836	24	21	1177.33	0.744465	1	25.2599	17.9999	11777.5	0.561283	1	24.63	19.5511	10111.3	1414.26	0.13987	10005	10486	9922	10472	5664	6358	12679	10821	7452	9458	10268	12186	10742	12064	12118	10046.3
553	379597	0.173703	0.382327	18	9	461.387	0.544155	1	20	6.00001	2538.25	0.31749	0.741252	19	7.60001	1619.91	751.934	0.464182	834	936	954	3723	612	2107	3711	1119	1263	1270	1267	1176	742	1172	1656	1502.8
555	380135	1	1	18	15	2520.13	1	1	20	17.9999	71356	1	1	19	16.4666	68705.5	3848.76	0.0560182	68033	72706	72822	110496	16799	38766	91853	80370	60309	46736	94278	62570	62509	74939	85406	69239.5
558	381608	0.967668	1	18	6	73325.6	0.309714	1	20	6	304002	0.660831	1	19	6.01667	181295	124374	0.68603	132058	135280	110366	333388	452127	68224	362267	155723	119074	79518	82649	140629	131608	130148	95814	168592
560	382613	1	1	18	9	4082.13	1	1	26.0568	12	40764.5	1	1	22.0284	10.5795	39176.8	1250.78	0.0319265	39296	35968	33906	47548	15593	43160	49093	49598	36033	43605	33822	41915	38488	35330	43883	39149.2
567	389988	0.128655	0.302951	18	6	7803.63	0.155406	0.95626	20	6	104888	0.0982164	0.310099	19	6.01667	49560.2	57151.1	1.15317	22690	22789	18501	144590	18072	127901	128988	21914	17780	23564	15699	26484	21210	22827	22830	43722.6
568	390121	0.499941	0.841218	18	9	22552.8	0.942769	1	20	6.00002	147729	0.825862	1	19	7.60001	66291.9	67702.6	1.02128	10156	639	17760	25989	480369	79213	5346	11658	18357	81622	31773	44404	324	18513	10087	55747.3
576	390549	0.0672083	0.182763	18	9	3126.65	0.355642	1	20	5.99999	15262	0.113148	0.34693	19	7.59999	8699.7	5068.23	0.582575	4460	4718	3755	22160	23432	9158	6298	9085	4605	5392	3359	4253	4573	6053	7354	7910.33
577	391853	0.391617	0.708441	24	9	11837.3	0.999866	1	23.1373	6	74190	0.758698	1	23.5686	7.47505	65045.2	8365.59	0.128612	54558	56913	76373	96670	8381	88901	102808	54639	72008	65588	73532	49760	48377	49205	78928	65109.4
581	395930	1	1	18	6	1369.14	0.839431	1	20	6	12516.5	0.986357	1	19	6.01667	7361.99	5289.91	0.718543	4884	3622	6007	5396	29545	10248	4877	3972	3103	6702	4528	5827	2703	4436	6475	6821.67
584	401994	0.0672083	0.182763	18	6	1349.16	0.452449	1	20	5.99998	8713.5	0.136626	0.408424	19	6.01666	7407.59	1057.28	0.142729	7727	7098	8024	8210	10771	9217	6656	6345	2587	5093	6887	10002	6512	7935	6430	7299.6
585	401996	0.391617	0.708441	24	3	462.448	0.865666	1	20	6	8942.25	0.705726	1	22	4.675	7526.86	1937.67	0.257434	7805	6862	7612	7018	13923	7430	7398	6242	3832	7798	6236	8370	7299	6914	6760	7433.27
592	402267	1	1	24	0	2992.12	1	1	21.6798	17.9999	85273.7	1	1	22.8399	20.9015	79864.1	5607.16	0.0702088	84627	82146	83485	108114	11781	52817	120094	103014	85905	60615	64247	91924	91396	75973	81802	79862.7
595	402286	1	1	18	9	714.708	1	1	28	6	6788.5	1	1	23	8.21429	6711.18	193.731	0.0288668	7813	5954	4280	7983	3426	8180	7565	6835	1810	9160	7055	6671	7844	8160	7952	6712.53
596	403856	0.128655	0.302951	18	9	151.144	0.382845	1	20	6	768.75	0.197549	0.530363	19	7.6	507.224	227.015	0.447563	277	299	387	1160	245	842	828	403	349	472	478	447	114	345	432	471.867
601	413572	1	1	18	6	342.947	0.751625	1	20	6.00001	2221.75	0.966227	1	19	6.01667	1417.3	855.29	0.603466	655	996	1154	3185	727	964	4011	1980	1444	487	828	572	1075	941	930	1329.93
605	417914	0.499941	0.841218	24	12	1639.43	0.972349	1	22.6301	12	7545.75	0.836756	1	23.3151	12.0104	5973.93	1753.39	0.293507	3400	4866	5048	8932	290	9094	6576	7188	4048	10787	8160	6295	6679	4454	4922	6049.27
606	417946	1	1	24	0	304.763	0.988204	1	20	18	2736.75	0.99993	1	22	20.9	2503.75	457.54	0.182742	2318	2688	4355	2341	664	2070	2823	2337	3024	2063	2151	1628	2153	2645	4521	2518.73
608	421550	1	1	24	6	247.841	1	1	26.7314	6	6387.5	1	1	25.3657	6.01744	6303.36	40.5756	0.00643714	6979	5345	6810	7141	3415	7209	7785	7041	4642	7691	5666	7021	6489	5940	5403	6305.13
609	421578	0.499941	0.841218	18	6	4722.24	0.905267	1	20	6.00001	59116.8	0.811381	1	19	6.01667	51752.1	7334.73	0.141728	52529	46772	47143	49369	79886	54395	52817	45464	34464	60103	46299	57626	44841	46482	46854	51002.9
618	471785	1	1	18	9	583.01	0.999977	1	20	6	7624	1	1	19	7.6	7036.65	484.843	0.0689026	5984	6532	6056	7763	10092	5646	6995	7105	6474	5606	7426	6815	6310	7465	8148	6961.13
620	473742	0.302826	0.582836	24	9	3449.27	0.95591	1	20	6.00001	35167.5	0.648332	1	22	7.42501	15952.9	14972.5	0.938548	5447	4504	6177	7345	112327	16821	4177	7639	6417	21164	10841	10066	4872	5191	4023	15134.1
625	475521	1	1	24	12	889.894	0.994713	1	23.0084	6	11152.2	0.999986	1	23.5042	8.94069	8027.68	4017.46	0.50045	4698	4373	6698	5973	2732	29996	5908	4942	4106	25408	7616	6383	4580	3726	4731	8124.67
636	513423	1	1	18	9	4008.23	0.99376	1	20	6	39836.8	0.99998	1	19	7.6	28175.3	9876.93	0.350553	13303	17711	20576	16313	94340	27553	21141	14490	18258	28483	31233	24528	19282	22681	29663	26637
641	514511	0.0672083	0.182763	18	9	5095.94	0.650217	1	20	5.99999	24772.5	0.180499	0.503843	19	7.6	20160	4983.06	0.247175	16271	8680	15670	28794	17371	24622	28303	22978	14870	23555	15760	20918	18531	18538	15898	19383.9
671	9-hydroxydec-2-enoic acid	0.0572561	0.169357	18	6	7879.29	0.958001	1	20	6	192938	0.214092	0.563979	19	6.01667	67605.9	129724	1.91883	4519	1960	2249	15742	23365	8787	723859	2159	8919	2249	3584	3210	3739	4271	6720	54355.5
675	adenosine-5-monophosphate	1	1	18	6	64.7003	0.999999	1	20	6	605.5	1	1	19	6.01667	579.976	21.3031	0.036731	700	445	599	701	356	560	805	815	358	619	159	319	492	772	967	577.8
677	alanine	0.967668	1	24	21	414316	0.84418	1	20	17.9999	8.20374e+06	0.982106	1	22	19.525	7.48819e+06	855488	0.114245	7745499	8245978	8479031	7897306	2275331	5649754	8283779	7914231	8913716	6514780	8201868	6495593	8066886	8606471	9646031	7.52908e+06
678	alanine-alanine	1	1	24	0	26403.2	0.890577	1	22.8809	17.9999	274835	0.993782	1	23.4404	20.9403	232453	34143.6	0.146884	242842	245057	232462	258015	37570	123220	316773	249565	244506	191124	233736	292421	242993	270904	293024	231614
680	alpha-ketoglutarate	0.967668	1	24	9	4825.12	0.891232	1	20	6	46737.2	0.990069	1	22	7.425	36342.2	9233.97	0.254084	24508	32865	30926	28281	81531	41847	35290	26906	30729	44275	40186	29756	21407	32312	36739	35837.2
685	azelaic acid	0.173703	0.382327	24	21	372.822	0.820659	1	26.0568	17.9999	2515.24	0.420248	0.924984	25.0284	19.5947	1801.77	552.019	0.306376	1342	1986	1929	1250	1652	1551	1157	1277	402	1805	2133	1556	1832	2331	4342	1769.67
688	beta-alanine	0.0672083	0.182763	18	9	69411.7	0.880593	1	24.3658	6.00001	416779	0.226501	0.584878	21.1829	7.90384	368701	63242.3	0.171527	268400	274236	295088	405187	594797	323420	343711	351906	318364	382825	496692	317888	296066	392339	388601	363301
689	beta-alanyl lysine	1	1	18	3	4356.48	0.999647	1	22.8809	17.9999	56222.2	1	1	20.4404	19.9636	50314.4	4878.07	0.0969518	53541	49802	57480	55069	5664	59791	59982	50637	38588	63413	43440	57032	47791	52418	67648	50819.7
691	beta-glycerolphosphate	0.302826	0.582836	18	9	172.357	0.561197	1	20	6.00002	1620	0.471135	0.99323	19	7.60001	1176.76	363.559	0.30895	770	972	912	835	1674	2656	1315	897	1113	893	1130	1129	696	778	1032	1120.13
692	beta-sitosterol	0.0672083	0.182763	18	9	732.209	0.892882	1	20	6	9260	0.22883	0.58734	19	7.6	3916.35	3911.96	0.998879	859	1327	524	2618	3812	28961	1649	1605	909	1535	802	1569	436	1298	1702	3307.07
693	biphenyl	0.0937853	0.238855	18	9	717.713	0.632458	1	20	6	3625	0.226874	0.584878	19	7.6	2745.69	845.928	0.308093	1986	1332	2265	3800	1433	4550	4717	2323	2184	3232	2371	1980	2115	2022	2899	2613.93
699	cerotinic acid	0.785464	1	18	9	179.605	0.924262	1	20	6.00001	1396.25	0.958461	1	19	7.60001	1104.27	243.566	0.220568	982	906	813	415	2001	1513	1656	1135	899	1071	881	516	847	1368	992	1066.33
701	cholesterol	0.0672083	0.182763	24	6	2204.05	0.175986	0.986093	20	6	50960.5	0.0643109	0.216856	22	6.05	17734.2	32064	1.80803	3335	3290	2975	38853	104161	33615	27213	4322	2728	3363	2626	3302	2346	4844	2233	15947.1
708	cysteine-glycine	0.785464	1	18	9	432.042	0.406149	1	20	5.99999	2051	0.683496	1	19	7.59999	1135.17	737.339	0.649539	427	560	715	1898	356	3839	2111	572	599	1232	696	611	423	654	612	1020.33
711	D-erythro-sphingosine	1	1	18	6	281.782	0.999993	1	20	6	2229.25	1	1	19	6.01667	2126.75	58.2086	0.0273698	2273	2183	2199	2429	702	2753	3033	2422	1166	2350	1608	2285	1945	2552	1912	2120.8
712	dimethylglycine	0.499941	0.841218	24	21	8821.86	0.902038	1	22.6301	18	37472.2	0.810098	1	23.3151	19.4727	26897	9247.55	0.343814	21192	30907	33814	19049	5259	5191	29569	37376	43820	8999	18148	11246	22173	46762	69708	26880.9
713	ergosterol	0.499941	0.841218	18	3	136.118	0.999997	1	20	6.00001	978.5	0.846532	1	19	4.43334	939.714	314.027	0.334173	925	1342	345	301	2999	242	372	1225	97	120	951	1386	722	1040	1929	933.067
716	ethanol phosphate	0.128655	0.302951	18	9	24480.9	0.737381	1	20	6	109153	0.318308	0.741252	19	7.6	67231.2	37806.2	0.562331	20228	45714	25992	32401	219895	74551	109766	18951	49372	94211	54530	32848	28591	46837	66257	61342.9
724	gluconic acid	0.630359	0.989558	24	15	2286.96	0.921267	1	20.9114	12	17586.2	0.896338	1	22.4557	13.4605	14350.1	3638.02	0.253519	14293	12151	10685	13167	694	16088	17388	20156	13274	22783	14132	20180	14705	16182	10995	14458.2
727	glucose-6-phosphate	1	1	18	6	3897.57	0.999999	1	28	6.00002	18183.5	1	1	23	6.29763	15994.4	1453.06	0.0908477	8756	13918	9820	18628	3530	25201	25375	10340	11099	13781	13495	12037	13674	35466	24212	15955.5
728	glucuronic acid	0.173703	0.382327	18	3	165.817	0.854428	1	20	4.14e-05	3091	0.431555	0.94249	19	1.58335	2887.32	451.544	0.156389	3262	3010	3001	3036	1804	2968	3332	2722	2813	1460	3169	3264	2902	3613	3788	2942.93
732	glyceric acid	0.230992	0.479622	18	15	9449.42	0.999969	1	20	12	88814	0.569471	1	19	13.6167	77441.1	12689.9	0.163865	78031	65867	97308	51807	125050	59285	61595	70807	72221	101108	111120	64936	60271	59538	83344	77485.9
744	ile-ile	1	1	18	9	1940.3	1	1	20	12	74202.2	1	1	19	10.45	72083.5	1258.12	0.0174537	70561	66544	77185	85795	72237	31834	92023	71855	57444	93644	73866	76986	72415	65044	71092	71901.7
746	inositol-4-monophosphate	0.230992	0.479622	18	9	2234.81	0.742474	1	20	6	9406	0.473894	0.99323	19	7.6	5171	3622.91	0.700622	1248	1980	1036	19593	1139	8356	8536	5073	2570	4264	2033	906	566	6947	4854	4606.73
757	leucine	0.499941	0.841218	18	0	678675	1	1	28	6.96e-05	8.39778e+06	0.846533	1	23	2.86e-05	8.03472e+06	130956	0.0162988	8240372	8174007	8778966	6481695	14050254	6010369	5823549	7553144	8405485	7195579	8282534	7837933	8408976	7531173	7691500	8.03104e+06
759	lignoceric acid	0.230992	0.479622	18	9	355.675	0.626882	1	20	5.99999	2835.75	0.424621	0.932176	19	7.59999	2171.42	508.669	0.234256	1596	2231	1204	2254	3712	2620	2757	2076	1610	2224	1420	1821	1098	2977	1783	2092.2
763	maleimide	0.499941	0.841218	24	9	11223	0.999982	1	22.3848	6	73353	0.846527	1	23.1924	7.45681	65433.4	7306.32	0.11166	53421	56896	77600	99804	8381	86084	99143	55884	73948	65588	70293	50642	55975	51246	75754	65377.3
770	melibiose	0.391617	0.708441	18	6	291.505	0.384825	1	20	6	1134	0.435902	0.946333	19	6.01667	762.775	392.665	0.514785	362	672	601	1219	646	1685	986	568	421	816	442	771	329	561	761	722.667
773	methionine sulfoxide	1	1	18	0	8692.46	1	1	25.2599	17.9999	206505	1	1	21.63	18.5216	205343	8956.95	0.0436196	253436	202478	201090	328840	63522	91066	310765	191964	128575	187018	304516	127177	177337	305922	215583	205953
775	methylhexose	0.0672083	0.182763	18	6	1179.1	0.746304	1	20	6	27048.5	0.200259	0.535932	19	6.01667	10472.2	17026.3	1.62586	2388	1901	2651	2049	25098	76741	4306	2307	1286	1533	1900	2170	2147	1929	2590	8733.07
792	oxoproline	0.391617	0.708441	24	9	1.43756e+06	0.940559	1	22.8809	6	8527545	0.736218	1	23.4404	7.46845	6.38735e+06	2.87113e+06	0.449503	3427334	3405943	5732430	5285224	7483858	17769894	3571204	3770689	5030480	14288036	8167655	7068360	3278106	3226301	4409114	6.39431e+06
799	phosphoethanolamine	0.302826	0.582836	24	21	19885.4	0.841771	1	27.082	7.88e-05	59216.3	0.603333	1	25.541	23.9447	67497.5	24805.7	0.367505	38474	84581	54594	103812	19048	45904	45220	35747	63777	33367	57366	81806	63900	86960	151084	64376
818	sorbitol	0.173703	0.382327	24	12	4678.22	0.95145	1	24.2229	6.00002	16457.5	0.462784	0.987663	24.1114	9.01407	12355.9	4638.26	0.375388	4197	9154	6247	30531	7409	10940	16950	14247	12214	13113	18848	22590	2815	10070	9652	12598.5
825	tetracosanol	0.0937853	0.238855	24	21	315.016	0.94181	1	20	6.63e-05	704.999	0.302673	0.718743	22	20.625	654.231	243.821	0.372683	727	956	432	309	1500	247	372	554	263	394	343	783	570	1124	1372	663.067
838	uridine	0.499941	0.841218	18	6	9930.96	0.58944	1	20	6.00001	66981	0.654745	1	19	6.01667	51817.9	15046.9	0.290381	59305	41877	36700	55943	101184	55900	54897	49783	28403	56133	36318	49337	41092	47608	39734	50280.9
842	xylose	0.0672083	0.182763	24	6	147.078	0.500011	1	20	6	896	0.147629	0.433629	22	6.05	488.131	397.073	0.813454	338	257	423	658	1867	403	656	538	281	129	421	367	112	305	235	466

## Sheet: unique cycling in TS
ID	CycID	JTK_pvalue	JTK_BH.Q	JTK_period	JTK_adjphase	JTK_amplitude	LS_pvalue	LS_BH.Q	LS_period	LS_adjphase	LS_amplitude	meta2d_pvalue	meta2d_BH.Q	meta2d_period	meta2d_phase	meta2d_Base	meta2d_AMP	meta2d_rAMP	X0	X0.1	X0.2	X6	X6.1	X6.2	X6.3	X12	X12.1	X12.2	X12.3	X18	X18.1	X18.2	X18.3	TS
4	479	0.00940748	0.0424091	18	9	4306.81	0.88598	1	20	6.00002	35748	0.0482363	0.171575	19	7.60001	19320.5	13477.9	0.697595	6564	8665	7911	10387	95965	23254	13386	11672	11004	17555	10964	9773	8618	11176	11426	17221.3
16	1732	0.00359818	0.020495	24	0	3407.9	0.101873	0.825762	23.6676	6.63e-05	19309.3	0.00326653	0.0212528	23.8338	3.34e-05	15609.2	3863.69	0.247526	17844	20256	19828	10430	15259	13461	13941	13423	12398	15834	10315	18400	16523	18278	14427	15374.5
25	1786	0.00211966	0.0136402	24	0	1447.09	0.120646	0.854657	21.5666	5.68e-05	14729	0.00237095	0.0162497	22.7833	3e-05	12442.1	2430.97	0.195383	14702	16255	13230	11832	14253	12589	12089	11077	7329	12109	8632	14455	12833	12276	12282	12396.2
26	1809	0.00211966	0.0136402	18	0	17673.8	0.249373	1	23.5328	17.9999	47670.7	0.00451693	0.027398	20.7664	18.3252	38903.6	15749	0.40482	59465	60068	55266	39297	3756	22548	46841	45837	27876	26059	29868	40072	49973	52100	48538	40504.3
31	1973	0.00359818	0.020495	18	0	9579.53	0.227319	1	20	17.9999	42452.9	0.00663242	0.0367837	19	18.05	34269.8	10154.6	0.296315	46273	52362	39003	31478	11187	20613	39709	36044	36823	31826	24561	43217	41069	44093	41433	35979.4
34	2017	0.00359818	0.020495	18	0	48079.4	0.349992	1	20	17.9999	225695	0.00966812	0.0482262	19	18.05	182804	57976	0.317148	286498	246733	225170	178403	7665	154848	179074	204183	131269	202857	168994	264707	207492	228843	201739	192565
48	2394	0.0473038	0.140412	24	0	17934.3	0.745005	1	22.8809	6.63e-05	114348	0.153143	0.446712	23.4404	3.4e-05	92788.3	27052.5	0.291551	126635	114629	101780	112289	4228	88735	116081	89797	56432	82506	60834	113397	98055	112655	95114	91544.5
52	2472	0.022073	0.0809025	24	9	584.07	0.617527	1	20	5.99999	4882	0.0721804	0.235845	22	7.42499	2903.57	1469.56	0.506121	1387	2408	2187	4170	10074	3030	2254	2271	2653	1739	2834	1857	1462	1950	2072	2823.2
55	2652	0.00940748	0.0424091	24	3	1263.07	0.0982222	0.807944	20.806	6.44e-05	14662.3	0.00737997	0.0395488	22.403	1.40022	12671.7	2976.55	0.234896	14019	16472	13496	12505	12638	12625	14110	11185	7458	10615	10788	14992	12473	13689	12147	12614.1
56	2659	0.022073	0.0809025	18	9	7820.25	0.196971	1	20	6	40371.5	0.0279913	0.110866	19	7.6	16362.9	17598	1.07548	4143	2810	2937	31395	82366	21543	26182	6558	2665	5169	3313	3892	2965	4657	3736	13622.1
57	2661	0.0326491	0.108787	18	6	6234.21	0.662753	1	20	5.99999	25651.8	0.104584	0.326535	19	6.01666	13345.5	13348.3	1.00021	7071	6277	2011	21418	57713	13737	9739	5691	2887	15819	5758	10139	6049	7995	7427	11982.1
68	3247	0.0326491	0.108787	18	6	1257.59	0.0432984	0.670731	20	6	2253	0.0106895	0.052088	19	6.01667	1001.8	1300.76	1.29843	480	220	310	2170	2802	1946	2094	339	184	258	254	204	369	1149	255	868.933
81	4721	0.000339216	0.00314241	18	9	1269.96	0.449173	1	20	6	8080.5	0.00149155	0.0112266	19	7.6	3300.96	3559.75	1.0784	560	642	488	5195	19561	3733	3833	1080	879	962	990	734	537	1155	849	2746.53
117	17174	0.000654457	0.00551707	18	9	690.843	0.0637783	0.670865	20	6	3014.5	0.00046265	0.00448292	19	7.6	2249.82	773.175	0.343661	1060	1619	1791	3329	2758	3154	2817	2095	2393	1625	2414	1632	1516	1898	1840	2129.4
138	20290	0.0326491	0.108787	24	12	471.994	0.261502	1	20	12	3252.5	0.0492055	0.172834	22	12.1	2302.46	984.834	0.427731	1424	2058	1957	1691	2231	2231	2329	2614	4489	2337	3570	2515	2263	1314	1521	2302.93
143	31222	0.000339216	0.00314241	18	9	186922	0.150067	0.930196	20	6	774414	0.000554131	0.00505562	19	7.6	339183	332175	0.97934	78479	96947	65419	408827	1446093	673175	569563	163639	94411	151127	145719	101713	66295	117427	132867	287447
169	46362	0.0473038	0.140412	18	9	108.718	0.674034	1	20	6.00001	1395	0.141746	0.418115	19	7.6	1289.13	135.639	0.105218	1092	981	1367	1425	1251	1431	1473	1142	1233	1424	1446	1072	1078	1201	1404	1268
184	64557	0.0473038	0.140412	18	0	4351	0.487457	1	22.1448	17.9999	23362.5	0.109983	0.340398	20.0724	18.1939	19477.3	5071.66	0.260389	24374	23433	26924	21112	2806	17199	20627	16678	15001	22283	18049	21883	19962	26023	25582	20129.1
203	66287	0.00940748	0.0424091	18	0	4203.75	0.456479	1	20	17.9999	17524	0.0277004	0.110866	19	18.05	14890.4	3891.13	0.261319	20972	20271	18247	13704	3563	10368	16833	18088	12875	17265	10900	19519	16454	19351	14772	15545.5
205	66350	0.0326491	0.108787	18	0	4141.52	0.591285	1	23.0084	17.9999	16837.2	0.0955091	0.303827	20.5042	18.2725	14471.5	4107.78	0.283853	20879	20227	17370	10227	1937	17342	15792	13806	8513	17118	13403	18026	16340	17215	15768	14930.9
211	84185	0.0473038	0.140412	18	9	280.721	0.919919	1	20	6	4433.75	0.179921	0.503843	19	7.6	1844.95	1893.35	1.02623	442	390	460	1303	14516	1326	590	419	456	698	620	463	421	654	493	1550.07
218	88910	0.0473038	0.140412	24	18	159.453	0.282161	1	26.2222	17.9999	1390.25	0.0709601	0.23367	25.1111	18.0353	1241.13	93.9475	0.0756951	1277	1074	1061	1073	1162	966	1202	1447	1319	1178	1267	1135	1463	1368	1595	1239.13
220	92727	0.0473038	0.140412	18	9	205.591	0.954764	1	20	6.00001	3047	0.185057	0.511397	19	7.6	1704.96	1073.27	0.629501	850	785	868	1142	8771	1238	1037	1113	956	1324	1206	766	847	992	1172	1537.8
224	96537	0.022073	0.0809025	18	0	3259.59	0.384464	1	20	17.9999	17289	0.04896	0.172834	19	18.05	14569.5	3454.2	0.237085	20516	17998	17015	16151	4602	8510	14661	16314	12691	11977	17674	18861	16120	17114	17061	15151
236	102963	0.00211966	0.0136402	18	6	384.313	0.710721	1	20	6	2688.25	0.0112956	0.0538692	19	6.01666	2078.44	617.182	0.296945	1862	1639	1905	1961	4254	2129	2409	1637	920	1861	1421	2552	2037	1867	1777	2015.4
238	103870	0.0145863	0.0602758	24	18	1423.76	0.279663	1	26.0568	18	13342.2	0.0265227	0.108013	25.0284	18.0304	9797.1	3100.09	0.316429	8446	9606	8979	9672	1388	8313	8016	10919	7924	9534	9867	10768	10279	14576	17746	9735.53
275	110425	0.0473038	0.140412	18	6	2192.74	0.813659	1	20	6.00002	8056.75	0.163863	0.465106	19	6.01668	6102.27	2350.29	0.38515	4717	5548	1978	8641	8600	7826	7160	5045	4213	4879	4994	7977	2410	6379	7566	5862.2
281	111732	0.00359818	0.020495	18	6	13855.8	0.693282	1	20	6.00001	68511.2	0.017446	0.0765989	19	6.01667	51846.7	17733.3	0.342034	41474	45911	37566	51385	105182	59617	57861	30276	49171	48198	19280	50865	53998	48095	51652	50035.4
293	117199	0.00211966	0.0136402	18	9	5783.43	0.231957	1	20	6	22470	0.00423706	0.0262636	19	7.6	12468.3	8913.56	0.714899	4959	6200	3290	20823	40350	16747	11960	14034	8692	10894	4668	7677	6852	3889	5165	11080
297	117735	0.00940748	0.0424091	18	9	432.042	0.443596	1	23.1373	6	2147.75	0.027038	0.109058	20.5686	7.80911	1792.21	456.437	0.254679	1382	1217	1066	2183	2750	2034	1624	1602	2000	1461	2567	1569	1248	1756	1680	1742.6
321	124612	0.0326491	0.108787	18	9	331.633	0.0761103	0.737482	20	6	1439.5	0.0173884	0.0765989	19	7.6	632.44	595.659	0.941843	190	82	201	1384	2301	986	1087	295	246	164	198	189	228	167	377	539.667
337	127629	0.0145863	0.0602758	18	9	944.695	0.075445	0.737482	20	6	5274	0.00859685	0.0452946	19	7.6	2591.61	1910.01	0.736996	751	670	954	6361	5334	4137	5264	991	783	1232	1125	999	1017	1492	3302	2294.13
349	130638	0.00590343	0.0294473	18	0	16355	0.231866	1	23.3994	17.9999	47096.4	0.0103945	0.0515443	20.6997	18.3115	37876.5	15702.9	0.414583	60923	58174	51684	38681	3756	20916	46653	42174	26649	25437	29264	38660	48781	53629	47316	39513.1
355	131314	0.0145863	0.0602758	18	0	1866.41	0.257284	1	20	17.9999	6858.99	0.0247133	0.101626	19	18.05	5412.44	1774.54	0.327864	7743	7201	7202	5920	2865	3809	1661	3928	5425	5104	7374	9009	7174	5950	5303	5711.2
384	170491	0.022073	0.0809025	24	6	768.802	0.0519596	0.670731	20	6	7012.75	0.00891224	0.0463767	22	6.05	4157.86	2698.35	0.648976	3120	3339	2696	7292	7984	4394	8381	2944	3047	3322	2169	2730	2809	2804	3081	4007.47
386	170496	0.00590343	0.0294473	18	9	741.401	0.200715	1	22.2642	6	3100.25	0.00916892	0.0471828	20.1321	7.74573	2424.08	876.351	0.361519	1672	1693	1422	2790	4391	2970	2250	1975	2731	2325	3730	1987	1398	1589	1811	2315.6
421	210885	0.0145863	0.0602758	18	0	1293.3	0.693181	1	22.8809	17.9999	6079.24	0.056562	0.195417	20.4404	18.2603	5139.51	1386.64	0.269801	6909	6379	6840	4556	950	4681	6278	1907	5264	4721	6668	5120	6185	6305	6707	5298
436	218800	0.00211966	0.0136402	24	9	87.5045	0.0812696	0.761225	20	6.00002	511.25	0.00166519	0.0123136	22	7.42501	420.472	98.8354	0.235058	263	377	378	579	516	430	520	446	418	438	451	340	306	369	395	415.067
445	223120	0.00940748	0.0424091	18	6	464.216	0.221367	1	20	6	2249.5	0.0149403	0.0677132	19	6.01667	895.26	1412.34	1.57757	185	152	153	3955	939	3323	781	167	340	171	134	251	181	353	180	751
468	228306	0.0326491	0.108787	18	6	6512.1	0.707172	1	20	6	42898.5	0.110096	0.340398	19	6.01667	35482.2	7336.34	0.206761	27001	33495	37363	38469	59624	34980	38521	31622	15939	34498	23869	42488	35653	36434	31037	34732.9
487	241618	0.000339216	0.00314241	18	9	14559.7	0.0554128	0.670731	20	6	55547.8	0.000223342	0.0027176	19	7.6	27776.1	21258.9	0.765366	12225	12526	10821	58427	81976	39637	42151	16848	14895	14018	15510	11677	12457	13638	10170	24465.1
490	320865	0.022073	0.0809025	24	0	10691.5	0.214687	1	21.1253	7.26e-05	74803.6	0.0301007	0.118023	22.5627	3.88e-05	62076.3	15975.1	0.257347	81667	71778	70966	66702	41857	58192	74915	56523	31312	60391	37975	68823	62076	73982	71798	61930.5
505	344754	0.022073	0.0809025	18	9	761.908	0.329879	1	20	6	3827.75	0.0431237	0.156749	19	7.6	2978.3	944.488	0.317123	1671	1918	2497	2990	5300	4275	2746	2438	2838	3577	3005	2022	1957	2067	3167	2831.2
510	345580	0.0145863	0.0602758	18	9	3725.75	0.923401	1	20	6	18922.5	0.0714849	0.234482	19	7.6	9830.46	8369.02	0.851335	3445	422	3179	5347	56577	9063	4703	4670	9319	9305	6670	3561	2091	4166	5387	8527
535	369124	0.022073	0.0809025	18	9	3177.03	0.0538644	0.670731	20	6.00001	9432.75	0.00919615	0.0471828	19	7.60001	5402.94	3424.35	0.633794	2366	1798	3426	9458	10092	8414	9767	2360	2153	7424	4097	4027	2144	2428	3090	4869.6
559	382604	0.0473038	0.140412	18	6	2086.32	0.952687	1	20	5.99999	8105	0.184753	0.511397	19	6.01666	6435.76	2088.88	0.324574	5154	5839	2358	8641	8793	7826	7160	5045	4213	4879	4994	7977	4038	8123	8296	6222.4
561	382616	7.55e-05	0.00109706	18	0	13809.3	0.0584506	0.670731	20	17.9999	55149.5	5.88e-05	0.00090148	19	18.05	44237.3	12637.3	0.285671	57545	59246	55379	31755	17968	34118	33274	55087	36595	52001	41907	58212	53592	53670	55124	46364.9
563	384906	0.0473038	0.140412	18	6	3950.61	0.557079	1	20	6	31945.2	0.122173	0.370211	19	6.01667	23913.9	8357.8	0.349496	19183	22374	17326	25107	52427	24639	25608	20771	17219	20914	19999	21003	17502	20399	21432	23060.2
616	425117	0.0473038	0.140412	18	9	233.699	0.75023	1	20	6	1514.75	0.153969	0.446901	19	7.6	1248.99	273.883	0.219283	1003	971	895	1545	702	1972	1840	1170	1147	1339	1172	1313	1027	937	1062	1206.33
645	517202	0.00120413	0.0086759	24	0	1530.18	0.107501	0.828354	21.0178	5.3e-05	14662.3	0.00128827	0.00978385	22.5089	2.84e-05	12632.5	2362.58	0.187024	14019	16472	13496	12505	12638	12625	13061	11185	7458	11130	10788	15342	12695	13689	12147	12616.7
653	1-hexacosanol	0.0473038	0.140412	18	3	70.1803	0.994232	1	20	6	325.25	0.190802	0.517191	19	4.43333	263.599	151.12	0.573295	292	312	135	94	854	165	188	87	106	126	149	379	183	454	382	260.4
656	2-aminobutyric acid	0.0473038	0.140412	18	9	2672.86	0.965629	1	20	6	75515.5	0.186646	0.512399	19	7.6	29105.9	33951.3	1.16648	2691	4021	3863	7845	277678	4940	11599	4697	7757	3810	6912	3847	5016	6078	6516	23818
662	3'-adenylic acid	0.0473038	0.140412	24	21	36.0624	0.881466	1	20	17.9999	499.75	0.174181	0.491086	22	19.525	472.944	54.1643	0.114526	733	440	441	406	449	399	405	506	453	428	474	534	461	479	525	475.533
690	beta-gentiobiose	0.022073	0.0809025	18	9	3631.35	0.082392	0.763258	20	5.99999	14288.5	0.0132937	0.0617938	19	7.6	6911.52	5699.28	0.824606	2205	2281	2859	18356	5564	16952	16282	2697	2999	5770	2983	3504	2183	1836	3887	6023.87
695	campesterol	0.00765546	0.0379621	18	9	529.8	0.301477	1	20	6	2173.5	0.0163204	0.0731813	19	7.6	1467.43	596.861	0.40674	749	760	717	2467	2004	1517	2706	1367	882	1002	1297	1297	841	1419	1592	1374.47
698	caprylic acid	0.0326491	0.108787	18	9	2712.64	0.959772	1	20	6.00001	33895.8	0.139851	0.416589	19	7.60001	21328.3	10650.1	0.499342	11581	11971	14051	15732	89388	12490	17973	14085	17588	15351	20923	12221	12495	14236	14959	19669.6
705	cyano-l-alanine	0.0145863	0.0602758	24	21	2532.33	0.172984	0.986093	22.0267	17.9999	10050	0.0176175	0.0769512	23.0133	19.4714	7869.95	2187.83	0.277998	6812	9808	9817	5554	4539	4741	6376	6041	11339	6884	6241	9683	10331	8242	11944	7890.13
717	ethanolamine	7.55e-05	0.00109706	18	0	521100	0.0465873	0.670731	20	17.9999	2.58107e+06	4.77e-05	0.000875362	19	18.05	2.07456e+06	610297	0.294182	3063485	2405512	2773811	1321222	1707069	1218059	1702079	2366224	2040145	1854262	1883466	2596923	2454364	2501214	2771788	2.17731e+06
721	fumaric acid	0.0145863	0.0602758	18	9	33826.6	0.783401	1	20	6	255617	0.0625256	0.212537	19	7.6	216094	39460.7	0.182608	174877	153810	177027	191512	348000	255109	227848	189501	201115	205850	227904	171259	179862	180647	264907	209949
741	histidine	0.0145863	0.0602758	24	21	100762	0.492824	1	20	17.9999	1.16947e+06	0.0426656	0.156749	22	19.525	978054	176799	0.180766	969910	1151804	1082794	958586	15934	655886	1111630	1088690	1060971	896171	1127326	1165010	1118055	1196383	1198427	986505
743	hypoxanthine	0.022073	0.0809025	24	3	1030.96	0.367406	1	24.9547	6.63e-05	3706	0.0471558	0.168442	24.4773	1.52987	2609.98	922.564	0.353476	2163	3812	5143	5191	3649	2276	2023	1552	2928	1083	1149	2274	1568	1756	1620	2545.8
754	lactose	0.022073	0.0809025	18	9	3337.9	0.0239511	0.670731	20	6	43115.2	0.00451758	0.027398	19	7.6	16370.1	19354.8	1.18233	2026	1548	2708	41749	53975	39371	37366	3383	2998	2023	2481	2025	1887	1935	4859	13355.6
766	malonic acid	0.0473038	0.140412	24	12	49.851	0.80742	1	24.9547	6	284.25	0.1629	0.464232	24.4773	9.06195	224.134	68.4388	0.305348	126	128	135	268	486	176	207	195	293	282	262	206	152	250	267	228.867
771	methanolphosphate	7.55e-05	0.00109706	18	9	80476.2	0.734119	1	20	6.00002	618446	0.000598483	0.00536724	19	7.60001	381378	202748	0.531619	192357	216099	215365	302745	1371726	394925	404386	237712	282948	323504	356243	251315	216224	252085	229366	349800
772	methionine	0.00590343	0.0294473	18	0	91973	0.92427	1	23.3994	17.9999	822998	0.0338893	0.12927	20.6997	18.3115	790289	75396.9	0.0954042	882480	887794	901460	594086	1025422	654921	641321	756461	770612	784808	780858	833745	836757	810122	811371	798148
774	methyl O-D-galactopyranoside	0.022073	0.0809025	18	6	4593.37	0.0683548	0.702721	20	5.99999	9432.75	0.0113106	0.0538692	19	6.01666	5403.95	4300	0.795715	3182	2788	2814	9458	10092	8414	9767	2401	2232	7424	2421	4656	1890	3842	3090	4964.73
783	N-acetylornithine	0.0473038	0.140412	18	9	470.226	0.973671	1	28	6.63e-05	22100.2	0.187819	0.512399	23	5.75003	6775.23	8624.96	1.27301	62409	1861	2031	4518	4406	4134	3628	4564	2702	2999	3402	2293	2252	2253	2233	7045.67
790	oleic acid	0.00590343	0.0294473	18	6	1659.58	0.238591	1	20	6	4726.5	0.0106557	0.052088	19	6.01667	2132.95	2656.57	1.24549	956	699	976	3359	9405	3782	2360	522	661	1285	59	944	807	1091	1018	1861.6
812	sedoheptulose 7-phosphate	0.00590343	0.0294473	24	21	1225.59	0.242901	1	25.5728	17.9999	13301	0.0108225	0.052433	24.7864	19.5673	9939.14	2619.66	0.263571	9335	9948	9185	9798	1388	8775	8016	10342	8256	9662	9182	11348	10488	14750	16618	9806.07
819	spermidine	0.00940748	0.0424091	18	0	43340.5	0.325355	1	20	17.9999	143921	0.0207798	0.0871512	19	18.05	113491	44041.8	0.388063	200203	127651	180575	99129	8184	67760	134391	132116	68061	114262	105579	137804	125960	160779	151141	120906
822	sucrose	0.000339216	0.00314241	18	9	1110.16	0.0412388	0.670731	20	5.99999	3097.75	0.000170346	0.00217578	19	7.6	1349.5	1360.97	1.0085	306	365	162	3892	1804	3721	2974	357	718	523	727	431	431	444	208	1137.53
832	tryptamine	0.0145863	0.0602758	18	9	465.983	0.678878	1	20	5.99998	5719.75	0.0556014	0.192889	19	7.59999	3621.89	1715.73	0.473712	1959	2356	2546	2672	11959	4095	4153	2564	2323	3880	2563	2025	1963	2509	2753	3354.67
833	tryptophan	0.00211966	0.0136402	18	0	57308.9	0.0379608	0.670731	23.5328	17.9999	468853	0.000839055	0.00693454	20.7664	18.3252	425631	72715.3	0.170841	537372	491289	512637	389707	379144	370626	386692	432995	352351	395633	371465	471335	496887	474954	432236	433022
834	tyrosine	0.00120413	0.0086759	18	0	305965	0.160769	0.971476	23.6676	17.9999	3.17985e+06	0.00184871	0.0135518	20.8338	18.3393	3.02639e+06	331319	0.109477	3612817	3318013	3443972	2977545	2374214	2798782	2982999	3121641	2826774	2798161	2913585	3201490	3226371	3081176	3210381	3.05919e+06

## Sheet: unique cycling TS in TM
ID	CycID	JTK_pvalue	JTK_BH.Q	JTK_period	JTK_adjphase	JTK_amplitude	LS_pvalue	LS_BH.Q	LS_period	LS_adjphase	LS_amplitude	meta2d_pvalue	meta2d_BH.Q	meta2d_period	meta2d_phase	meta2d_Base	meta2d_AMP	meta2d_rAMP	X0	X0.1	X0.2	X0.3	X6	X6.1	X6.2	X6.3	X12	X12.1	X12.2	X12.3	X18	X18.1	X18.2	X18.3	TM
4	479	0.139706	0.230024	18	9	1963.28	0.800513	1	20	6	11753.8	0.356839	0.584108	19	7.6	9432.48	2370.76	0.25134	7878	5148	6544	7471	17646	9896	11316	8157	9198	12372	7391	7376	11388	6060	6502	9120	8966.44
16	1732	0.105571	0.180519	24	18	2007.48	0.457916	0.870974	26.3284	17.9999	23751.5	0.194793	0.344981	25.1642	18.0386	21432.2	1613.34	0.0752767	23638	20785	17606	19325	21340	17965	22287	16557	22319	24822	20107	20288	23704	25250	22084	23968	21377.8
25	1786	1	1	18	12	1365.78	0.999973	1	20	12	18087	1	1	19	12.0333	17015.8	1004.18	0.0590148	20636	16979	14643	13590	19351	16017	15513	14081	18239	20709	17741	15659	18894	20279	16541	11483	16897.2
26	1809	0.0579045	0.112474	18	0	8804.72	0.473153	0.884408	25.4179	17.9999	44651.7	0.125955	0.238983	21.7089	18.5412	42841.2	7184.21	0.167694	60506	51612	43116	53017	36290	37571	42893	30720	35868	34816	46323	45501	37580	53670	43628	43729	43552.5
31	1973	1	1	24	0	6170.92	0.991589	1	25.1282	17.9999	63527.9	0.999965	1	24.5641	21.08	57279.7	5647.79	0.0986001	77724	64988	51089	40557	48820	54740	65354	43393	54002	56294	54663	48397	47315	77613	62762	66422	57133.3
34	2017	1	1	18	15	18765.2	0.999853	1	20	12	200940	1	1	19	13.6167	199321	14441.1	0.0724515	233387	251386	203144	177425	205256	164870	179748	185749	211593	234333	196831	161004	196158	210180	198488	177349	199181
48	2394	1	1	18	0	7022.98	0.946219	1	27.6489	6.63e-05	102027	0.998527	1	22.8245	2.74e-05	95459.7	1931.76	0.0202363	110099	102333	104536	91140	116378	84686	111582	82443	92381	94931	91416	84535	78645	103019	95979	84586	95543.1
52	2472	0.475047	0.650105	18	9	203.647	0.999103	1	23.52	6.63e-05	1910.5	0.828327	1	20.76	5.19003	1535.68	176.328	0.114821	667	5089	1399	487	2164	1552	1955	1573	1136	965	1040	1326	989	934	986	2138	1525
55	2652	1	1	18	6	1055.89	0.999998	1	20.7529	6	17585.5	1	1	19.3765	6.03043	16641.5	768.141	0.0461582	21339	17565	15352	12854	19621	17561	19602	13558	18103	17311	16871	11361	14390	20528	16883	11918	16551.1
56	2659	0.268412	0.406963	18	9	1044.75	0.958826	1	20	6	4278.5	0.60667	0.88943	19	7.6	3451.63	738.943	0.214085	2607	2433	2523	2298	5217	3258	5300	3339	4223	1550	4345	2433	3179	3734	4220	2243	3306.38
57	2661	1	1	18	15	528.209	1	1	20	6	5559	1	1	19	1.26667	4952.18	421.558	0.0851256	5417	4824	4224	5170	11006	3545	4351	3334	313	6072	5242	5508	5895	6607	4810	4153	5029.44
68	3247	1	1	18	9	57.0989	1	1	20	6	872	1	1	19	7.6	746.38	90.3182	0.121008	219	148	1598	302	1603	670	137	1078	309	256	1873	179	185	1126	1817	158	728.625
81	4721	0.0787266	0.14365	18	6	1275.97	0.0390387	0.221664	20	6	3222.5	0.0208528	0.0526316	19	6.01667	1607.59	1659.96	1.03258	696	941	664	770	3992	2861	3741	2296	197	1380	541	1119	698	671	800	1136	1406.44
117	17174	0.139706	0.230024	18	6	491.086	0.147424	0.424503	20	6	2223	0.100564	0.197611	19	6.01667	1644.01	610.726	0.371486	1189	1156	1200	1606	2204	2757	2192	1739	1280	1458	1181	1498	1507	1035	1378	1740	1570
138	20290	1	1	18	0	198.697	0.999285	1	24.5682	6.63e-05	2013	1	1	21.2841	2.87e-05	1747.8	196.883	0.112646	1290	1521	2351	2890	2004	1854	1730	1300	1083	1987	1807	1324	1598	1388	1428	2761	1769.75
143	31222	0.0579045	0.112474	18	9	94741.3	0.314783	0.704552	20	6	351800	0.091225	0.181374	19	7.6	223880	119319	0.53296	160768	97701	153935	87778	589301	200463	228262	389172	165743	239745	306583	71079	114457	130838	129563	141405	200425
169	46362	1	1	18	15	47.5529	1	1	20	12	891.5	1	1	19	13.6167	880.09	35.1351	0.0399222	935	744	945	1007	981	718	847	835	819	948	751	1048	986	803	692	1017	879.75
184	64557	1	1	18	0	1733.12	0.999917	1	24.5682	6.63e-05	14449.2	1	1	21.2841	2.87e-05	13167.6	1083.99	0.0823224	16862	8296	15344	17295	16790	12399	11879	9245	11768	12040	11503	14321	9867	12700	14081	18225	13288.4
203	66287	0.719948	0.903149	24	21	1219.58	0.977773	1	20	17.9999	27600.2	0.951069	1	22	19.525	26668.3	1289.87	0.048367	32465	29702	23638	25312	24390	25850	26013	22459	28490	28603	28628	22648	28950	30334	25027	26090	26787.4
205	66350	1	1	18	15	1332.9	1	1	20	12	20749	1	1	19	13.6167	19828.7	1651.79	0.0833033	25249	23087	18881	16444	22758	18767	18034	16052	22814	23692	21024	15466	17926	21371	20446	14992	19812.7
211	84185	0.0579045	0.112474	18	9	241.3	0.37594	0.774858	20	5.99999	806.5	0.105083	0.205534	19	7.6	602.343	246.241	0.408806	406	264	434	295	1144	947	268	867	596	569	595	772	609	433	277	387	553.938
218	88910	1	1	24	0	72.832	0.997576	1	24.2975	6.63e-05	1210.25	0.999997	1	24.1488	3.3e-05	1126.47	111.395	0.0988885	1026	1047	1138	1630	1058	1003	1072	1125	1165	843	871	1340	1089	977	1273	1358	1125.94
220	92727	0.182589	0.290419	24	9	66.1145	0.542262	0.958096	20	6	865	0.327976	0.542125	22	7.425	740.049	84.7362	0.114501	609	616	714	795	994	857	748	861	724	700	633	715	657	537	663	904	732.938
224	96537	1	1	18	15	523.966	0.99992	1	20	12	16390.8	1	1	19	13.6167	15791.8	736.406	0.0466321	14165	14900	17555	16612	15432	14243	17050	14493	14382	16582	17964	16635	14618	16614	15646	15664	15784.7
236	102963	0.139706	0.230024	18	9	112.607	0.612278	1	20	5.99999	1577.5	0.295861	0.495847	19	7.6	1372.19	160.26	0.116791	1086	1261	1294	1365	2001	1418	1531	1360	1548	1306	951	1321	1297	1200	1314	1198	1340.69
238	103870	1	1	18	6	724.077	1	1	20	6	6238.5	1	1	19	6.01667	5754.7	608.722	0.105778	1450	7420	5710	5310	4062	6774	6414	7704	5790	6323	5335	1108	8398	6843	5645	6609	5680.94
275	110425	0.380147	0.539502	24	6	1636.25	0.507986	0.920308	20	6	9606.75	0.510678	0.784156	22	6.05	7142.22	1998.53	0.279819	5905	5312	5577	9915	11920	7895	9500	9112	4873	6820	2472	8186	4215	5559	5638	9393	7018.25
281	111732	0.105571	0.180519	24	12	8887.27	0.867264	1	23.9024	12	59398.5	0.310452	0.516196	23.9512	12	50298.6	8706.38	0.173094	39863	50418	43220	31356	68020	17238	55192	58250	64722	63283	47956	61633	57136	56169	47455	42645	50284.8
293	117199	0.301037	0.439056	18	6	2456.84	0.644215	1	20.0911	6	8653.75	0.51203	0.784802	19.0456	6.01814	5982.87	2235.22	0.373604	3626	4562	2852	13800	10390	6128	11572	6525	5983	4577	3488	748	4952	5110	4547	2545	5712.81
297	117735	0.301037	0.439056	24	3	181.019	0.813852	1	20	6	1279.75	0.589591	0.871417	22	4.675	1180.11	132.026	0.111876	1094	1474	1162	1323	1530	1047	1002	1540	993	778	990	795	902	899	1484	1804	1176.06
321	124612	0.0787266	0.14365	18	6	198.52	0.062423	0.263631	20	6	751	0.0310371	0.0727565	19	6.01667	369.858	394.936	1.0678	203	119	131	181	395	878	893	838	116	200	190	168	151	123	374	192	322
337	127629	0.301037	0.439056	18	9	262.69	0.225081	0.580256	20	6	2930	0.250149	0.429483	19	7.6	1752.67	862.507	0.492109	995	1009	1045	1210	3383	1072	4491	2774	869	1377	1216	1082	793	1366	1411	1237	1583.12
349	130638	0.0787266	0.14365	18	0	7779.94	0.986762	1	20	17.9999	43460.2	0.276176	0.468162	19	18.05	38981.8	5596.94	0.143578	60226	51263	12370	55830	36135	33976	28099	30451	35535	34488	46381	44572	36597	53013	41622	42609	40197.9
355	131314	0.719948	0.903149	18	3	105.712	0.95004	1	25.4179	6.63e-05	4327.25	0.943774	1	21.7089	1.80911	4216.92	521.118	0.123578	5246	4450	4384	3229	4196	3766	3798	4111	3661	4070	3454	4490	5970	5178	4397	3505	4244.06
384	170491	0.235786	0.35814	24	6	962.196	0.470193	0.884408	20.3695	6	4686	0.354706	0.581746	22.1848	6.04044	3440.84	883.962	0.256903	4143	3111	3994	3228	1884	5892	5426	5542	3030	1328	3150	2796	993	3557	2859	3320	3390.81
386	170496	0.139706	0.230024	24	6	257.387	0.812981	1	22.5575	6	2834	0.360641	0.589188	23.2788	6.00576	2013.93	900.216	0.446995	1522	1590	2188	1767	5195	1811	2343	1987	1454	3607	1294	1912	267	1396	1378	2178	1993.06
421	210885	0.235786	0.35814	18	0	375.12	0.983678	1	28	12	3608.5	0.570865	0.853262	23	4.92857	3652.88	651.652	0.178394	4662	3386	3632	5438	3832	3391	2983	2945	3237	3207	3430	4560	3293	3244	3563	3858	3666.31
436	218800	0.587657	0.776481	18	9	32.3501	0.856361	1	20	6.00001	363.75	0.848813	1	19	7.60001	310.17	42.1953	0.13604	253	201	254	345	339	292	439	385	288	310	242	295	352	245	240	350	301.875
445	223120	0.719948	0.903149	18	6	502.046	0.986346	1	20	6	2741	0.953208	1	19	6.01667	1743.33	1004.86	0.5764	695	683	1690	2003	5320	3995	864	785	177	3262	315	520	199	266	2239	2932	1621.56
468	228306	1	1	24	12	2907.62	0.905241	1	23.6461	6	30645.8	0.995361	1	23.8231	8.97821	26558.7	3945.28	0.14855	28684	28325	21107	12400	40260	27413	28743	26167	28323	31848	27459	24420	19841	26487	30653	22291	26526.3
487	241618	0.0787266	0.14365	24	6	2750.29	0.0159278	0.211033	20	6	40039.2	0.00963208	0.0292081	22	6.05	18178.7	20448.4	1.12486	8293	9889	8928	11284	43771	38921	42880	34585	10177	10264	7835	7644	6660	8974	9670	10789	16910.2
490	320865	0.301037	0.439056	24	6	7101.83	0.666757	1	28	6.63e-05	65271	0.523043	0.797333	26	3.25003	58701.7	3483.58	0.0593437	71361	71968	55851	61904	80879	53632	66044	52436	52282	62377	59430	51701	49467	52320	62084	36398	58758.4
505	344754	0.587657	0.776481	18	6	322.794	0.825731	1	20	6	2101.5	0.836128	1	19	6.01667	1772.81	353.261	0.199267	1373	1407	1457	1930	2506	1876	1692	2332	1467	1759	1297	1764	1925	1162	1658	2075	1730
510	345580	0.105571	0.180519	24	3	935.856	0.54777	0.962021	27.8233	4.56e-05	4861.5	0.222655	0.385817	25.9117	1.6195	3801.15	764.501	0.201124	4547	3536	5066	6297	4186	3535	3335	4488	2850	3574	2837	3115	3061	2201	2400	5561	3786.81
535	369124	0.0579045	0.112474	18	9	2758.42	0.0714507	0.286748	20	6	12056.8	0.0268417	0.0653789	19	7.6	6799.78	3849.76	0.56616	2924	6093	1990	2803	12356	11322	12726	11823	2905	4135	2560	6332	6323	3185	7388	1823	6043
559	382604	0.235786	0.35814	24	9	1660.29	0.562935	0.978463	20	6	9606.75	0.400775	0.641088	22	7.425	7392.99	1634.52	0.221091	5044	5291	5651	10737	11920	7895	9500	9112	4873	6820	7404	8186	3414	5559	5638	9049	7255.81
561	382616	0.0787266	0.14365	24	18	8553.87	0.181204	0.495959	20	18	78493.2	0.0748931	0.155436	22	18.15	71572.2	7627.13	0.106565	81137	80994	70031	62086	66487	55169	61187	56902	79889	80850	75461	70812	81734	87593	79668	64978	72186.1
563	384906	0.105571	0.180519	18	6	4849.87	0.34752	0.739263	20	6.00001	33670.2	0.157953	0.290096	19	6.01667	27653.9	5914.37	0.213871	27910	20802	31447	21118	36963	30727	40085	26906	26783	26665	21416	20078	22343	28048	22559	27145	26937.2
616	425117	0.719948	0.903149	18	6	610.94	1	1	28	6	5035.25	0.956506	1	23	6.29762	3865.13	510.032	0.131957	961	2422	4162	1088	1991	3162	2176	12812	1391	3590	1696	1545	5112	4402	2544	12507	3847.56
645	517202	1	1	18	6	695.44	1	1	21.5648	6	17307.2	1	1	19.7824	6.04911	16655.5	537.903	0.0322958	21339	17565	15205	12854	19621	17561	18489	13558	17389	18246	16871	12515	14976	20528	16883	11918	16594.9
653	1-hexacosanol	0.235786	0.35814	24	3	76.3675	0.709612	1	25.5652	4.5e-05	322.25	0.466457	0.728653	24.7826	1.54893	218.717	108.296	0.495143	309	248	183	549	322	86	225	235	143	97	167	120	125	78	204	389	217.5
656	2-aminobutyric acid	0.0787266	0.14365	18	6	3202.84	0.331705	0.720688	20	6.00002	12215.5	0.121307	0.231886	19	6.01667	9087.65	3423.33	0.376701	7128	4670	7845	7426	8688	12985	13789	13400	7818	6235	5901	11104	5626	8034	8263	9853	8672.81
662	3'-adenylic acid	0.719948	0.903149	18	12	102.177	0.982063	1	20	12	575.75	0.952146	1	19	12.0333	486.926	109.947	0.225799	465	379	374	651	660	371	443	412	521	595	577	610	137	419	403	566	473.938
690	beta-gentiobiose	0.0787266	0.14365	18	9	2546.29	0.0332947	0.211033	20	6	10723.8	0.0182018	0.0481007	19	7.6	6307.72	3322.93	0.526805	2744	4472	3580	4388	13399	10569	8389	10538	3795	5675	3411	3764	4735	3284	4143	3586	5654.5
695	campesterol	0.0579045	0.112474	18	9	450.604	0.081206	0.298914	20	6	2009.75	0.0299047	0.0710131	19	7.6	1072.48	670.126	0.624837	287	572	455	1121	1068	2691	1833	2447	562	518	643	563	324	462	467	1039	940.75
698	caprylic acid	0.719948	0.903149	18	3	1134.55	0.999708	1	27.1385	6	12862.8	0.956437	1	22.5692	4.37567	13027.4	535.237	0.0410856	14998	12767	13754	9248	16945	9247	13196	12063	14618	10200	8810	11629	14124	9422	16539	20718	13017.4
705	cyano-l-alanine	0.182589	0.290419	18	0	2752.41	0.723318	1	20	17.9999	8909.5	0.399435	0.640159	19	18.05	7199.01	2276.99	0.316292	10285	7769	10224	10460	3878	2560	6566	3665	8955	5740	5860	11500	8044	2320	9510	15764	7693.75
717	ethanolamine	1	1	18	12	64462	1	1	20	12	2.84084e+06	1	1	19	12.0333	2.77297e+06	64088.9	0.023112	2428905	2497699	3051803	2962790	2983135	2687434	2672216	2567241	2558321	2742244	3222655	2840131	3252384	2835437	2213557	2730426	2.7654e+06
721	fumaric acid	0.587657	0.776481	18	9	19887.7	0.977558	1	20	6	216292	0.892902	1	19	7.6	198273	18132.8	0.0914536	163028	150775	214567	177116	253969	213117	214963	183118	175399	208816	189083	206097	224184	165946	154438	220721	194709
741	histidine	0.0787266	0.14365	24	21	175703	0.422248	0.827802	20	17.9999	1.25809e+06	0.146396	0.271833	22	19.525	1.14464e+06	152048	0.132835	1301326	1201728	1383706	1230521	948059	1057613	1074136	855776	1024955	959791	1318098	1150794	946209	1244758	1437361	1404045	1.15868e+06
743	hypoxanthine	0.105571	0.180519	24	9	1102.38	0.737427	1	22.5575	6	11003.2	0.2766	0.468162	23.2788	7.46069	9338.1	1436.66	0.153849	9381	10777	9718	5751	13749	9732	10029	10503	6481	8856	10450	11779	8499	8459	8885	5655	9294
754	lactose	0.0579045	0.112474	18	9	5202.54	0.504111	0.917852	20	5.99999	21527.2	0.132346	0.247929	19	7.6	11388.5	7035.62	0.617783	1154	3259	1631	5989	25411	20325	19745	20628	4151	4839	3003	7449	2147	1753	25842	12761	10005.4
766	malonic acid	1	1	24	6	7.42462	1	1	20	6.00001	169	1	1	22	6.05	159.71	3.38046	0.0211662	133	185	115	216	337	188	19	132	199	131	112	140	105	152	160	228	159.5
771	methanolphosphate	0.475047	0.650105	18	12	19446.1	0.987315	1	25.4179	12	306884	0.824121	1	21.7089	12.3608	279249	41824.1	0.149773	223609	197949	351899	316011	321269	298566	288308	243091	235973	325783	316727	349054	268035	192576	199589	299377	276738
772	methionine	0.0579045	0.112474	18	15	128895	0.0529742	0.241391	20	12	951564	0.0208185	0.0526316	19	13.6167	885616	147976	0.167089	997220	894733	956309	905776	811590	703227	702871	619916	908507	989330	978812	929606	994099	971787	908256	874890	884183
774	methyl O-D-galactopyranoside	0.105571	0.180519	24	6	2200.16	0.0293735	0.211033	20	6	12056.8	0.0210123	0.0527184	22	6.05	7337.91	4425.8	0.603142	4666	5817	5078	5832	12356	11322	12726	11823	3998	5582	5323	6332	4736	4269	8065	5089	7063.38
783	N-acetylornithine	1	1	24	6	1208.09	0.982265	1	24.4321	6.63e-05	17894.2	0.999842	1	24.2161	3.02704	9521.09	1038.95	0.109121	49465	1559	1635	18918	4606	3883	4108	3836	3559	2809	1683	2733	2058	1088	48243	2151	9520.88
790	oleic acid	0.0787266	0.14365	18	6	2084.73	0.127064	0.385304	20	5.99999	4687.5	0.0560668	0.121815	19	6.01666	2634.44	1903.21	0.722433	1102	5770	978	1073	5542	3993	4006	5209	1365	1213	1063	1297	1587	1209	1641	1413	2403.81
812	sedoheptulose 7-phosphate	0.719948	0.903149	18	6	834.209	0.999536	1	28	6	6362.75	0.956396	1	23	6.29762	5893.38	381.232	0.0646882	4517	7606	635	5466	4220	6867	6517	7847	5912	4101	5415	5830	8598	7415	6812	6326	5880.25
819	spermidine	0.301037	0.439056	18	0	11225.9	0.995555	1	28	12	119931	0.660829	0.949489	23	4.92857	119666	18948.6	0.158346	141020	133683	111013	156682	129271	96582	108219	98781	108631	117210	128617	125265	83508	121805	136255	124364	120057
822	sucrose	0.0787266	0.14365	18	9	1264.66	0.0241212	0.211033	20	6	3143.25	0.0137988	0.039035	19	7.6	1280.46	1352.65	1.05638	306	331	233	389	4250	2282	3100	2941	239	486	414	105	404	273	52	428	1014.56
832	tryptamine	0.475047	0.650105	24	6	290.267	0.420205	0.825718	20	6	2912.25	0.521271	0.796072	22	6.05	2236.11	650.721	0.291005	2030	1324	2303	2066	3266	3250	3299	1834	1805	1948	2283	1872	1824	1927	1402	2699	2195.75
833	tryptophan	0.105571	0.180519	18	15	79113.2	0.398211	0.801174	20	12	622572	0.175269	0.315726	19	13.6167	558800	91573	0.163875	635427	594208	486944	525958	529835	465675	446499	442683	560988	716950	674142	538206	614659	648337	574429	471663	557913
834	tyrosine	0.235786	0.35814	18	15	273506	0.508735	0.920308	20	12	3707237	0.374331	0.606197	19	13.6167	3.39008e+06	341146	0.100631	3647188	3376943	3416684	2703126	3464449	3017006	3098268	2953870	3395124	3956328	3937274	3540222	3555942	3740082	3253243	3132629	3.38677e+06

## Sheet: shared cycling in TM and TS
ID.x	CycID	JTK_pvalue.x	JTK_BH.Q.x	JTK_period.x	JTK_adjphase.x	JTK_amplitude.x	LS_pvalue.x	LS_BH.Q.x	LS_period.x	LS_adjphase.x	LS_amplitude.x	meta2d_pvalue.x	meta2d_BH.Q.x	meta2d_period.x	meta2d_phase.x	meta2d_Base.x	meta2d_AMP.x	meta2d_rAMP.x	X0.x	X0.1.x	X0.2.x	X0.3	X6.x	X6.1.x	X6.2.x	X6.3.x	X12.x	X12.1.x	X12.2.x	X12.3.x	X18.x	X18.1.x	X18.2.x	X18.3.x	TM	ID.y	JTK_pvalue.y	JTK_BH.Q.y	JTK_period.y	JTK_adjphase.y	JTK_amplitude.y	LS_pvalue.y	LS_BH.Q.y	LS_period.y	LS_adjphase.y	LS_amplitude.y	meta2d_pvalue.y	meta2d_BH.Q.y	meta2d_period.y
28	1840	0.00164724	0.00708482	24	12	20203.8	0.0501529	0.23669	23.7736	12	82338.5	0.000859295	0.00406958	23.8868	12.0003	60128.5	26532.7	0.441267	44534	40478	33307	35488	80060	61149	61139	62928	73893	95193	88467	71801	64024	69957	44590	33479	60030.4	28	0.0473038	0.140412	18	9	9326.38	0.269829	1	20	6.00001	77869.2	0.0684291	0.227109	19
32	1981	1.91e-05	0.000211771	18	9	2732.61	0.0309355	0.211033	20	5.99998	8193.25	9.06e-06	0.000115738	19	7.59999	4147.65	3290.82	0.793417	1202	1601	1244	1866	8590	7901	5598	10684	2717	2613	2506	2268	1563	1480	2181	1998	3500.75	32	0.00359818	0.020495	18	9	1868.53	0.175503	0.986093	20	5.99999	9846.75	0.00528395	0.030682	19
38	2031	2.22e-07	1.25e-05	18	9	26380.7	0.0320236	0.211033	20	5.99999	52252.2	1.4e-07	1.08e-05	19	7.59999	21146.4	24599.6	1.1633	1218	1340	2059	2199	40357	39917	52499	76236	5839	8240	7003	9728	4745	2881	2651	4059	16310.7	38	8.88e-07	4.68e-05	18	9	5745.6	0.208763	1	20	6	32277.5	3.06e-06	0.000143261	19
46	2197	0.000572095	0.00305238	24	15	4943.38	0.0772256	0.298914	21.8859	12	28061.2	0.000487187	0.00256687	22.9429	13.4595	22728.4	6148.07	0.270502	18309	20465	17960	17072	24011	20061	18471	18565	27969	32685	27475	24116	25281	28264	20626	20665	22624.7	46	0.0473038	0.140412	18	15	3466.94	0.313262	1	20	12	21057.8	0.0772322	0.250411	19
60	2806	0.0210199	0.0507729	24	21	4271.63	0.217725	0.568242	23.1496	17.9999	38621.5	0.0292296	0.0700015	23.5748	19.4792	34370.3	4757.27	0.138412	42555	38242	35835	29610	30494	29336	32649	25678	33353	36810	31106	31184	36075	43841	37985	36585	34458.6	60	0.00590343	0.0294473	24	21	3851.96	0.276114	1	20	18	22727	0.0120934	0.0569537	22
61	2813	0.0065055	0.0205398	24	9	2946.51	0.0283234	0.211033	20	6	20386.8	0.00176872	0.00734499	22	7.425	8335.48	8435.02	1.01194	4425	3729	2626	2183	27240	12608	20018	21681	6624	4523	3659	2322	2811	2741	2957	1894	7627.56	61	0.0145863	0.0602758	24	9	1821.51	0.345948	1	20	6	30197.5	0.0317356	0.12216	22
67	3232	7.77e-06	0.000128434	18	9	12232.9	0.0445799	0.223696	20	6	26086.2	5.5e-06	8.08e-05	19	7.6	12893.8	12646.1	0.980791	2325	1461	261	1615	36423	19674	24344	23904	8475	12150	17512	3071	3171	5933	3265	2942	10407.9	67	0.00359818	0.020495	18	9	4415.53	0.79435	1	20	6	101054	0.0196004	0.08345	19
69	3248	0.000572095	0.00305238	18	9	3522.1	0.0777646	0.298914	20	6	14833.5	0.000490278	0.00256711	19	7.6	6803.71	6215.52	0.913549	7326	438	1231	1155	19258	6070	21633	12373	3605	3977	3411	2072	1681	1774	1919	1387	5581.88	69	8.88e-07	4.68e-05	18	9	7563.57	0.810373	1	20	6	99204.8	1.09e-05	0.000316799	19
70	3294	2.89e-06	6.76e-05	18	9	3377.14	0.0150656	0.211033	20	5.99999	16331.8	7.8e-07	2.27e-05	19	7.6	6616.95	7716.8	1.16622	717	704	552	658	16933	16835	17020	14539	3170	3026	2488	1323	682	1223	824	906	5100	70	8.88e-07	4.68e-05	18	9	5286.33	0.0510372	0.670731	20	6	15708.8	8.12e-07	8.42e-05	19
82	4723	0.00980952	0.0282233	18	6	1306.73	0.250853	0.616362	20	5.99999	3799	0.0172432	0.0464408	19	6.01666	2390.95	1557.73	0.65151	1253	762	1417	1564	4926	3303	3700	3267	637	1945	1768	1856	2405	2416	1697	2319	2202.19	82	0.00120413	0.0086759	18	9	1384.16	0.455217	1	20	5.99999	8339.5	0.00466411	0.0276891	19
84	4793	7.77e-06	0.000128434	18	9	5469.47	0.0183348	0.211033	20	6.00001	15718.2	2.39e-06	4.79e-05	19	7.60001	6993.17	7449.88	1.06531	797	683	924	642	15772	16443	17678	12980	4003	4166	4040	3792	2674	2306	728	831	5528.69	84	1.15e-05	0.000278046	18	9	4209.05	0.0929953	0.799949	20	5.99998	13856	1.58e-05	0.000430443	19
87	4819	0.000320124	0.00195554	18	9	7327.75	0.0170562	0.211033	20	5.99999	23884	7.16e-05	0.000536931	19	7.6	9960.86	11043.6	1.1087	3162	1546	829	844	18512	25559	27326	24139	5039	4038	4552	2666	2442	1382	1414	1189	7789.94	87	0.000654457	0.00551707	24	9	7391.74	0.0754763	0.737482	20	6.00002	26975.2	0.000539189	0.00499739	22
97	8270	0.000320124	0.00195554	18	9	1371.08	0.0583881	0.253717	20	6	4424.25	0.000222194	0.00130076	19	7.6	2159.97	2042.96	0.945824	574	374	755	354	3597	6364	5696	2040	1791	1402	1618	1454	866	488	348	413	1758.38	97	0.00475081	0.0265227	18	9	848.882	0.303833	1	20	6	5501.75	0.0108847	0.052433	19
98	8598	0.000320124	0.00195554	18	9	7897.32	0.0205211	0.211033	20	6	23639.2	8.5e-05	0.000601869	19	7.6	9544.92	10725.9	1.12373	1146	1456	1354	1362	28502	24761	23453	17841	3389	572	4814	2658	1945	2207	1676	1847	7436.44	98	8.88e-07	4.68e-05	18	9	9551.24	0.0319019	0.670731	20	6	26372.2	5.21e-07	7.32e-05	19
102	14702	4.22e-05	0.000390745	18	9	2549.83	0.0153281	0.211033	20	5.99998	14307	9.86e-06	0.000117379	19	7.59999	6796.63	6125.44	0.901248	2196	2198	1819	1556	15089	13718	14852	13569	4006	4190	4029	3121	1996	2533	2963	1645	5592.5	102	0.00359818	0.020495	24	9	822.365	0.248103	1	20	6	11189	0.00716072	0.0386954	22
103	14709	8.88e-07	2.58e-05	18	9	3492.05	0.0164508	0.211033	20	6	13912.2	2.78e-07	1.08e-05	19	7.6	5385.68	6603.59	1.22614	361	453	374	308	16582	12455	13996	12616	1666	2002	1632	818	525	398	698	517	4087.56	103	3.55e-06	0.000119774	18	9	2458.96	0.0213641	0.670731	20	6	17032.8	1.32e-06	8.9e-05	19
104	14730	8.88e-07	2.58e-05	18	9	6361.13	0.0153928	0.211033	20	5.99999	31601	2.61e-07	1.08e-05	19	7.6	12253.9	15039.8	1.22735	939	982	724	668	34958	33680	29140	28626	4598	4014	3929	1814	1209	1369	1154	954	9297.38	104	8.88e-07	4.68e-05	18	9	11445.9	0.0271213	0.670731	20	6	35954.5	4.47e-07	7.32e-05	19
105	14746	7.77e-06	0.000128434	18	9	1195.72	0.0176667	0.211033	20	6	4881	2.31e-06	4.78e-05	19	7.6	1971.14	2244.07	1.13847	214	208	295	214	5832	4649	4682	4361	813	768	589	360	364	440	298	393	1530	105	0.000339216	0.00314241	18	9	998.435	0.0215189	0.670731	20	6	6826	9.36e-05	0.00132976	19
108	16645	0.00421867	0.0149426	18	9	124.804	0.426872	0.831254	24.5682	6	580.25	0.0131812	0.0375397	21.2841	7.92001	493.033	94.8332	0.192346	420	347	323	413	501	596	627	597	364	588	573	526	319	500	522	491	481.688	108	0.00166189	0.0118727	24	12	131.168	0.0957029	0.806342	22.3848	12	565.75	0.00155013	0.0115642	23.1924
110	16707	0.00421867	0.0149426	18	9	3388.1	0.0159789	0.211033	20	5.99999	13208.2	0.000714861	0.00354487	19	7.6	5434.88	6107.64	1.12379	908	693	753	765	14347	13562	13833	11091	2813	2428	2290	674	854	1097	891	749	4234.25	110	0.000339216	0.00314241	18	9	2893.13	0.145698	0.921265	20	5.99998	11884	0.000539458	0.00499739	19
112	16788	4.22e-05	0.000390745	18	9	3034.9	0.0162127	0.211033	20	6.00002	9875.75	1.04e-05	0.000118379	19	7.60001	4219.27	4719.92	1.11866	411	645	377	424	9203	10790	11141	8369	2366	2094	2141	2007	931	949	374	441	3291.44	112	1.15e-05	0.000278046	18	9	2472.05	0.0237212	0.670731	20	5.99999	9763	4.41e-06	0.000195741	19
113	16792	8.88e-07	2.58e-05	18	9	2994.6	0.0157986	0.211033	20	5.99999	19662.8	2.68e-07	1.08e-05	19	7.59999	8486.63	8928.74	1.0521	1032	1706	1510	1422	20605	19786	19366	18894	4181	3693	5117	2184	1754	1953	2680	1820	6731.44	113	0.000165168	0.00183206	18	9	2517.3	0.139415	0.917215	20	6	15922	0.000268928	0.00298297	19
116	17070	8.88e-07	2.58e-05	18	9	2085.61	0.0167577	0.211033	20	6	8573	2.83e-07	1.08e-05	19	7.6	3376.21	4006.82	1.18678	421	366	318	296	10183	7543	8905	7661	1270	1336	885	514	461	452	424	382	2588.56	116	1.15e-05	0.000278046	18	9	1689.99	0.0370174	0.670731	20	6	12286	6.69e-06	0.000235142	19
118	17222	1.91e-05	0.000211771	18	9	3934.52	0.0319756	0.211033	20	6.00002	8790.25	9.35e-06	0.000117379	19	7.60001	4004.5	3849	0.961168	1212	1037	633	606	12288	6840	7366	8667	2099	2423	2171	1371	1364	1431	1682	776	3247.88	118	0.00590343	0.0294473	24	9	428.153	0.349573	1	20	6	4067.5	0.014824	0.0677132	22
119	17297	0.00164724	0.00708482	18	9	755.897	0.100988	0.3419	20	6.00002	2813.25	0.00161385	0.00687109	19	7.60001	1550.78	1032.81	0.665992	688	466	875	590	1570	2630	4153	2900	475	1254	973	1462	794	786	727	1221	1347.75	119	0.00120413	0.0086759	18	9	1158.95	0.0541824	0.670731	20	6.00001	3393.25	0.000694011	0.00609429	19
120	17298	4.22e-05	0.000390745	18	9	2086.67	0.0179965	0.211033	20	6	7195.5	1.15e-05	0.000122241	19	7.6	2926.33	3278.35	1.1203	451	679	396	179	8793	7221	6552	6216	1081	1002	983	731	572	548	666	440	2281.88	120	0.00590343	0.0294473	24	9	630.739	0.0958492	0.806342	20	6	6249.75	0.00479673	0.0282772	22
121	17382	0.00267199	0.0105751	24	6	1050.76	0.0817236	0.298914	20	6.00001	4345.75	0.00205904	0.00834504	22	6.05	2577.24	1492	0.578913	2437	2439	1473	3220	5377	3559	5793	2654	1558	1578	2262	1362	1049	1396	2494	1104	2484.69	121	0.022073	0.0809025	18	6	4335.8	0.106704	0.828354	20	6	11002.5	0.0166073	0.0740737	19
122	17456	8.88e-07	2.58e-05	18	9	16444.1	0.015744	0.211033	20	5.99999	91334.2	2.67e-07	1.08e-05	19	7.59999	36329.1	43890.4	1.20813	1432	3005	1561	1619	90032	87744	85566	101995	18583	16020	9331	8946	2358	3909	5767	5352	27701.2	122	8.88e-07	4.68e-05	18	9	64825.1	0.0219881	0.670731	20	6	312810	3.66e-07	7.32e-05	19
126	17682	0.000320124	0.00195554	18	9	892.369	0.0180203	0.211033	20	6	2951.5	7.54e-05	0.000552225	19	7.6	1161.56	1372.53	1.18163	98	110	174	127	3605	3033	2758	2410	444	452	261	172	139	62	210	213	891.75	126	0.022073	0.0809025	18	9	765.797	0.125953	0.870317	20	6	4788.25	0.0191422	0.0823302	19
127	17703	4.22e-05	0.000390745	18	9	4053.49	0.0172029	0.211033	20	6	15235.8	1.1e-05	0.000120244	19	7.6	7115.71	6567.48	0.922955	2196	2198	1819	1556	17902	13585	15327	14129	4006	4190	4029	3121	1996	2533	2963	1645	5824.69	127	0.00211966	0.0136402	24	9	1118.29	0.0544635	0.670731	20	6	14655.8	0.00116214	0.00915594	22
128	18256	8.88e-07	2.58e-05	18	9	6364.67	0.0156921	0.211033	20	6	31170	2.66e-07	1.08e-05	19	7.6	11833.6	14665.7	1.23932	939	982	724	668	32551	33680	31972	26477	3053	1488	4177	1814	1209	1369	1154	954	8950.69	128	8.88e-07	4.68e-05	18	9	2309.41	0.0191951	0.670731	20	6	38335	3.22e-07	7.32e-05	19
133	18489	0.00164724	0.00708482	18	9	1505.78	0.0625458	0.263631	20	6	5453	0.00104888	0.00485827	19	7.6	2054.54	2567.25	1.24955	112	152	116	189	2298	7739	7856	3919	593	102	543	460	159	122	201	237	1549.88	133	0.000654457	0.00551707	18	9	1405.02	0.110686	0.828354	20	6	5563.5	0.000762985	0.00663089	19
135	18588	4.22e-05	0.000390745	18	9	13128.9	0.0412827	0.221664	23.1496	6.00001	36534	2.48e-05	0.000235212	20.5748	7.81003	25039.9	13321	0.531992	16275	13218	10140	7725	45208	36578	35714	28636	31622	32247	28778	20217	17049	18678	16884	10310	23079.9	135	0.0145863	0.0602758	18	9	15862.9	0.807835	1	23.0084	6	40589.5	0.0641139	0.216856	20.5042
136	18619	0.000987235	0.00470192	18	9	14084.9	0.109898	0.351928	20	6	34004.2	0.00109893	0.00503476	19	7.6	13278.3	15802.7	1.19011	1210	1324	1498	1622	65886	24641	21572	23918	3109	5782	2352	2937	2970	1157	1074	1698	10171.9	136	0.000339216	0.00314241	18	9	11252.9	0.294499	1	20	6	59191.8	0.0010201	0.0081127	19
137	20281	0.0419656	0.0867083	24	6	612.001	0.181999	0.496521	24.7059	5.99998	3671.5	0.0448688	0.100865	24.3529	6.00125	3185.21	228.998	0.0718943	2653	3805	4179	3740	4544	3239	3405	3498	2732	3024	2815	2707	3078	2672	2366	2549	3187.88	137	0.00120413	0.0086759	18	6	1997.22	0.446839	1	20	6	6393.25	0.00458827	0.027432	19
142	22969	0.0144977	0.0373749	18	9	3342.85	0.0298898	0.211033	20	5.99999	11240.8	0.00378907	0.0140096	19	7.6	5572.35	4388.4	0.787532	1342	1227	3045	2076	11874	12039	11842	9208	1202	4059	3506	2977	1439	2141	4540	2838	4709.69	142	0.00359818	0.020495	18	9	3598.47	0.577947	1	20	6.00002	10178.8	0.0149221	0.0677132	19
149	32158	8.77e-05	0.000697384	18	9	832.972	0.0226081	0.211033	20	6	2701.25	2.8e-05	0.00025536	19	7.6	1291.92	1131.77	0.876037	332	256	391	510	2826	2302	3266	2411	416	809	768	823	522	405	386	688	1069.44	149	7.55e-05	0.00109706	18	9	953.533	0.0544002	0.670731	20	6.00001	2505.25	5.5e-05	0.000875362	19
157	34097	0.0299489	0.066265	24	0	2458.26	0.281456	0.655434	24.9858	6.63e-05	15453.5	0.048688	0.108665	24.4929	3.25e-05	12874.2	2815.69	0.218708	17046	17310	13522	13936	10474	9757	12863	12629	10417	10505	10386	12472	9271	16294	15297	13120	12831.2	157	0.0326491	0.108787	24	21	5279.61	0.186349	0.995191	22.8809	17.9999	18616.2	0.0371258	0.137873	23.4404
186	64569	0.0144977	0.0373749	24	15	1840.25	0.0542693	0.245657	20	12	9437	0.00641035	0.0214707	22	13.475	6950.98	3108.55	0.44721	6620	5852	4585	5854	5918	5129	3941	6417	8334	10148	10471	8795	7599	8626	6438	5151	6867.38	186	0.022073	0.0809025	18	0	2390.37	0.57441	1	20	17.9999	17589.2	0.0680583	0.227109	19
191	64632	0.000572095	0.00305238	18	9	267.817	0.0804021	0.298914	20	5.99999	845	0.000505372	0.00262352	19	7.59999	601.881	263.283	0.437434	376	327	338	342	1044	795	835	706	470	457	678	781	366	619	300	368	550.125	191	0.0326491	0.108787	18	6	172.181	0.436743	1	20	5.99999	755.25	0.0748662	0.243676	19
207	66827	7.77e-06	0.000128434	18	9	1152.94	0.0410279	0.221664	20	6	2400.5	5.09e-06	7.94e-05	19	7.6	1130.67	1191.57	1.05386	167	134	97	112	3265	1810	2345	2182	296	1715	222	1204	174	172	303	145	896.438	207	0.00120413	0.0086759	18	9	2042.83	0.105219	0.828354	20	6	12280.8	0.00126364	0.00977294	19
214	84925	2.89e-06	6.76e-05	18	9	12289.9	0.0149937	0.211033	20	5.99999	81438	7.77e-07	2.27e-05	19	7.59999	34187	37706.8	1.10296	5044	5634	4313	4216	85760	82556	79666	77770	16621	18525	14138	8248	7362	7923	5832	4787	26774.7	214	8.88e-07	4.68e-05	18	9	17021.5	0.0219532	0.670731	20	6	94055.2	3.66e-07	7.32e-05	19
216	88847	4.22e-05	0.000390745	18	9	64934.3	0.024711	0.211033	20	5.99998	160796	1.54e-05	0.000158311	19	7.59999	71961.9	72805.1	1.01172	14987	17389	13679	9365	187965	157419	189779	108019	45993	46037	40369	17227	18109	22527	17839	15698	57650.1	216	8.88e-07	4.68e-05	18	9	33191.9	0.0862158	0.778126	20	5.99999	144547	1.33e-06	8.9e-05	19
223	95440	0.000320124	0.00195554	18	9	5213.14	0.0737742	0.290615	20	5.99999	9585.5	0.000275221	0.00154674	19	7.59999	5593.51	4291.27	0.767189	855	1000	1701	1114	9259	9107	10095	9881	1088	6246	5898	8375	4050	4913	1075	1342	4749.94	223	0.00359818	0.020495	24	9	1336.08	0.1117	0.828354	20	5.99999	8715.25	0.00354462	0.0226372	22
225	97450	8.88e-07	2.58e-05	18	9	6510.51	0.0230361	0.211033	20	5.99999	15406	3.83e-07	1.34e-05	19	7.6	6339.93	7134.55	1.12534	890	845	712	696	10086	18006	17544	15988	2670	3390	2189	1293	1417	1281	916	1076	4937.44	225	3.11e-05	0.000582233	18	9	5487.5	0.0375578	0.670731	20	6	15232.8	1.71e-05	0.000437173	19
226	98053	0.00980952	0.0282233	18	15	2037.7	0.03251	0.211033	20	12	8548	0.00288631	0.0110598	19	13.6167	5932.29	2844.04	0.479417	6090	5722	4218	4629	3286	4365	3396	4307	9415	9049	8498	7230	6159	7704	5810	4598	5904.75	226	0.0326491	0.108787	18	0	1108.39	0.0833098	0.763371	20	17.9999	7688.75	0.0187873	0.081219	19
228	100114	0.00164724	0.00708482	18	9	411.89	0.377415	0.776002	20	5.99998	1862.75	0.0052117	0.0180801	19	7.59999	903.757	765.954	0.847522	129	211	344	296	3999	1292	859	1301	418	784	477	278	384	215	485	579	753.188	228	0.0145863	0.0602758	18	9	337.997	0.49769	1	20	6	4252	0.0430156	0.156749	19
230	100343	2.22e-07	1.25e-05	18	9	281.075	0.0230064	0.211033	20	6	939	1.03e-07	1.08e-05	19	7.6	539.161	361.363	0.670231	208	213	179	224	981	954	987	834	377	443	368	516	316	325	272	293	468.125	230	0.00120413	0.0086759	18	9	184.378	0.0632365	0.670865	20	6	784.5	0.000798218	0.00677887	19
232	102246	0.0144977	0.0373749	18	9	19589.7	0.736326	1	24.7059	6	91111.8	0.0591382	0.127177	21.3529	7.93109	73944.7	19854.3	0.268502	53607	55344	27299	62273	146921	97779	47221	72526	84983	84244	71050	78275	72364	62464	61112	68534	71624.8	232	0.0326491	0.108787	18	9	20843.7	0.75057	1	20	6	137958	0.115393	0.351177	19
235	102727	0.0065055	0.0205398	24	9	1300.37	0.0202269	0.211033	20	6	6314.75	0.00130742	0.00580081	22	7.425	2153.35	2586.75	1.20127	132	1823	1928	91	7803	6702	6945	3809	368	391	276	173	172	167	138	62	1936.25	235	0.00590343	0.0294473	24	6	1427.47	0.0217277	0.670731	20	6	7007	0.00127773	0.00978385	22
242	105081	0.000779665	0.00413369	24	9	610.233	0.017319	0.211033	20	5.99999	3967.25	0.000164907	0.00108606	22	7.42499	1741.77	1625.21	0.933079	861	435	699	773	4445	3752	4411	3261	1119	1149	1353	735	528	720	773	672	1605.38	242	0.0473038	0.140412	18	9	1252.99	0.0255548	0.670731	20	6	5405.75	0.00932995	0.0473804	19
243	105085	2.22e-07	1.25e-05	18	9	3083.69	0.0168779	0.211033	20	5.99999	11279.2	7.64e-08	1.08e-05	19	7.59999	4609.32	5289.95	1.14766	502	553	485	363	12329	10748	12568	9472	1912	2273	1574	1283	793	844	763	649	3569.44	243	0.00120413	0.0086759	24	9	934.088	0.0255542	0.670731	20	6	12760.5	0.000350444	0.00351696	22
245	105370	7.77e-06	0.000128434	18	9	4478.11	0.0301042	0.211033	20	6	9697.75	3.81e-06	6.83e-05	19	7.6	4516.92	4634.85	1.02611	437	405	484	478	11907	7340	11071	8473	1118	4627	3952	2399	1156	1460	1457	929	3605.81	245	0.00120413	0.0086759	18	9	2871.91	0.195098	1	20	6	6987.75	0.002198	0.0154459	19
247	105630	0.0210199	0.0507729	18	6	6138.39	0.0429523	0.223696	20	6	23426.8	0.00723181	0.0234477	19	6.01667	9744.11	13796	1.41583	2015	4182	3538	4088	29680	10363	29112	24552	1911	3844	1793	1555	2676	1122	5016	3710	8072.31	247	0.000165168	0.00183206	24	9	2169.76	0.184657	0.995191	20	5.99999	15661.5	0.000347627	0.00351696	22
248	105769	2.89e-06	6.76e-05	18	9	3679.08	0.0203722	0.211033	20	5.99999	8911.5	1.04e-06	2.65e-05	19	7.59999	3712.08	4179.41	1.12589	442	557	439	389	10149	9586	6123	9788	1324	2268	1648	1081	508	727	666	553	2890.5	248	3.55e-06	0.000119774	18	9	1931.82	0.163706	0.971476	20	5.99999	8915.25	8.93e-06	0.000278822	19
249	105863	1.91e-05	0.000211771	18	9	671.751	0.0172838	0.211033	20	5.99999	2295	5.25e-06	8.05e-05	19	7.59999	980.593	1043.96	1.06462	160	206	184	141	2439	2205	2650	1886	480	498	475	240	187	258	234	163	775.375	249	0.000165168	0.00183206	18	9	479.065	0.096608	0.806342	20	5.99999	2457.25	0.000192207	0.0023828	19
251	106385	0.00421867	0.0149426	24	9	1438.79	0.0858792	0.307254	20	6	4710.25	0.00323279	0.0122208	22	7.425	2572.9	1853.91	0.720551	1163	1622	1130	1713	5442	4379	5815	3205	5039	1710	1838	1040	1129	1337	1043	1072	2417.31	251	0.00120413	0.0086759	18	9	1023.18	0.19729	1	20	6.00002	4938.5	0.00222004	0.0154459	19
252	106387	0.00980952	0.0282233	18	9	14916.1	0.0146576	0.211033	20	6	87680	0.00141587	0.00612092	19	7.6	33940	40219	1.185	1315	1018	1605	20214	97844	86474	86943	79459	15189	934	11936	4051	2296	2655	2634	1974	26033.8	252	0.00590343	0.0294473	24	6	10503.7	0.105271	0.828354	20	6	100253	0.00520997	0.0305	22
257	109386	8.88e-07	2.58e-05	18	9	719.658	0.0400074	0.221664	20	6.00002	2047.5	6.45e-07	2.09e-05	19	7.60001	1267.36	823.692	0.649929	376	310	391	440	2061	1847	2036	2246	1204	1033	1232	1327	1199	664	543	778	1105.44	257	0.00590343	0.0294473	18	9	705.693	0.358092	1	22.6301	6	2132	0.0151343	0.0682258	20.3151
258	109997	1.91e-05	0.000211771	18	9	6052.3	0.0823985	0.298914	20	6.00001	15191.8	2.26e-05	0.000218931	19	7.60001	9255.05	6339.02	0.684925	3619	2376	2654	3541	14357	18793	7366	20251	8473	11058	9007	7376	4714	6713	3936	3909	8008.94	258	0.00590343	0.0294473	18	9	8501.01	0.414568	1	20	5.99998	44062.8	0.0171628	0.0761487	19
261	110014	7.77e-06	0.000128434	18	9	2848.58	0.0163368	0.211033	20	5.99998	11361.8	2.14e-06	4.78e-05	19	7.59999	5015.77	5218.8	1.04048	832	594	1050	905	13030	11158	10926	10333	2320	3357	2316	2302	1579	888	966	1282	3989.88	261	7.55e-05	0.00109706	18	9	3031.01	0.0299162	0.670731	20	5.99998	9636.25	3.16e-05	0.000650042	19
274	110413	8.77e-05	0.000697384	18	9	5967.8	0.18115	0.495959	20	5.99999	28497	0.000191417	0.00121327	19	7.59999	22000.2	7606.94	0.345767	11815	13824	15603	15531	42337	25708	23531	22412	22760	24397	19904	23463	18920	16070	14092	17710	20504.8	274	0.000165168	0.00183206	18	9	7915	0.588353	1	20	6.00001	48860	0.000994994	0.00806519	19
276	110501	0.000320124	0.00195554	24	9	2404.69	0.0149162	0.211033	20	6.00001	9314.75	6.33e-05	0.000503248	22	7.42501	5067.86	3416.58	0.674165	2244	2641	3956	3262	8578	9127	9740	9814	4269	5136	3036	4905	3322	2753	1953	1762	4781.12	276	0.000339216	0.00314241	18	9	2550.53	0.0802506	0.760126	20	6	8718.5	0.000313369	0.00334392	19
283	111740	8.77e-05	0.000697384	18	9	2566.62	0.0663822	0.274912	20	5.99999	11326	7.6e-05	0.000552225	19	7.59999	4836.26	5219.04	1.07915	865	526	720	1129	9777	15254	16154	4119	2248	2831	2396	1276	1110	1177	776	607	3810.31	283	1.15e-05	0.000278046	18	9	1872.77	0.220712	1	20	5.99999	10747.8	3.54e-05	0.000709837	19
290	117034	7.77e-06	0.000128434	18	9	1618.92	0.0178274	0.211033	20	6	5145.5	2.33e-06	4.78e-05	19	7.6	1940.45	2435.5	1.25512	149	108	140	115	5859	5580	5380	3763	569	514	386	235	166	155	148	120	1461.69	290	0.00285892	0.0182581	18	9	185.969	0.234546	1	20	6	5562	0.00557052	0.0317294	19
292	117196	0.0210199	0.0507729	18	9	10246.3	0.0325062	0.211033	20	6	27634.8	0.00566341	0.019329	19	7.6	12878.3	11159.9	0.866561	5233	4800	3956	4112	27591	23417	39165	20366	8076	6521	4636	4013	4889	4812	4231	5135	10684.6	292	3.11e-05	0.000582233	18	9	22175.9	0.149268	0.930196	20	6	195970	6.16e-05	0.000927504	19
294	117235	2.22e-07	1.25e-05	18	9	1345.62	0.0262227	0.211033	20	6	3387.25	1.16e-07	1.08e-05	19	7.6	1623.48	1668.15	1.02751	161	230	212	221	3980	3555	3898	2116	1899	1361	937	858	336	321	284	360	1295.56	294	7.55e-05	0.00109706	18	9	1607.25	0.145916	0.921265	20	6	4540	0.000136751	0.00182986	19
296	117535	0.00164724	0.00708482	18	9	1453.63	0.0790963	0.298914	20	6	4381.5	0.00129584	0.00577985	19	7.6	1764.49	1971.8	1.11749	245	307	185	305	6295	2406	6468	2357	610	679	421	264	311	292	246	639	1376.88	296	0.00211966	0.0136402	18	9	3432.65	0.327891	1	20	6	16249.8	0.00574889	0.0323088	19
306	119023	0.000572095	0.00305238	18	9	28888.5	0.0288681	0.211033	20	6	64063	0.000198369	0.00124411	19	7.6	30082.1	29780.3	0.989969	7438	5279	4769	6061	51051	84240	73357	47604	23598	23357	18996	13107	10990	14843	608	2349	24227.9	306	0.0326491	0.108787	18	9	11432	0.290649	1	20	6	49461.2	0.0536872	0.187018	19
309	119129	0.000171384	0.00126734	18	9	1810.55	0.0783913	0.298914	20	6	5982.25	0.000164144	0.00108606	19	7.6	3332	2393.44	0.718319	721	1414	802	1865	5141	3322	8344	7122	2430	2607	3112	2234	1402	1747	946	2575	2861.5	309	7.55e-05	0.00109706	18	9	2016.31	0.255945	1	20	6	9141	0.000229013	0.0027176	19
317	121476	0.000320124	0.00195554	18	9	900.5	0.534461	0.950529	23.9024	5.99999	1721.5	0.00165504	0.006976	20.9512	7.86739	1041.59	956.553	0.918362	160	247	171	190	2104	1996	1332	1454	499	424	503	4603	297	253	275	124	914.5	317	0.00590343	0.0294473	18	9	436.992	0.0583478	0.670731	20	6	3345.5	0.00309096	0.0205172	19
318	121482	0.0299489	0.066265	18	9	553.311	0.0464173	0.227499	20	6	2033.5	0.010535	0.0313817	19	7.6	1034.99	764.606	0.738755	392	509	426	395	1208	2515	1907	2504	881	424	365	588	643	499	421	478	884.688	318	0.000165168	0.00183206	18	9	782.767	0.138924	0.917215	20	6.00001	2276.25	0.000268061	0.00298297	19
319	122710	0.000320124	0.00195554	18	9	1423.05	0.0162906	0.211033	20	5.99999	5045.5	6.87e-05	0.000535854	19	7.6	2113.98	2333.91	1.10403	220	422	219	514	4386	5227	6015	4554	998	987	1010	555	313	359	336	368	1655.19	319	0.00940748	0.0424091	24	9	394.742	0.0987168	0.807944	20	6	4913	0.00741246	0.0395488	22
325	125788	0.000320124	0.00195554	18	9	2337.34	0.0821794	0.298914	20	6	8595.25	0.000303739	0.00168455	19	7.6	4715.55	3552.9	0.753444	1496	3610	1430	1197	14035	5709	8524	6113	3268	4682	3990	3248	1533	2375	1682	1382	4017.12	325	3.11e-05	0.000582233	18	9	2549.3	0.0712718	0.715264	20	6.00002	8760	3.11e-05	0.000650042	19
326	125882	1.91e-05	0.000211771	18	9	30947.6	0.0151138	0.211033	20	5.99999	183541	4.63e-06	7.51e-05	19	7.59999	75071.4	86968.8	1.15848	6007	10337	7233	4711	175214	176971	194559	187420	37270	35268	32413	15833	14160	15160	12565	2483	57975.2	326	3.11e-05	0.000582233	18	9	60418.7	0.0262009	0.670731	20	6	201380	1.22e-05	0.000343716	19
327	125884	0.0065055	0.0205398	18	9	973.863	0.045296	0.224615	20	6	4251.75	0.00269026	0.0104511	19	7.6	1845.86	1852.89	1.00381	425	473	460	395	5393	5071	1805	4738	1012	1093	436	424	468	478	529	506	1481.62	327	3.55e-06	0.000119774	18	9	1093.54	0.0867662	0.778126	20	5.99999	4936	4.93e-06	0.000197856	19
328	125885	2.22e-07	1.25e-05	18	9	716.299	0.0197602	0.211033	20	5.99999	2203.75	8.88e-08	1.08e-05	19	7.59999	976.953	973.612	0.99658	204	245	199	213	1980	2747	1865	2223	532	563	416	304	248	272	301	257	785.562	328	8.88e-07	4.68e-05	18	9	795.142	0.0585128	0.670731	20	5.99998	2204	9.23e-07	8.42e-05	19
330	125888	0.0065055	0.0205398	24	9	167.584	0.0262049	0.211033	20	5.99999	878	0.00164968	0.006976	22	7.425	395.688	348.527	0.880813	114	230	185	196	870	1040	1016	586	252	373	147	228	76	148	144	258	366.438	330	0.0399765	0.132678	18	6	340.118	0.0418249	0.670731	20	6	829.5	0.0123624	0.0578973	19
331	125897	1.91e-05	0.000211771	18	9	68998.8	0.119919	0.373032	20	6.00002	244310	3.2e-05	0.000284167	19	7.60001	112782	109725	0.972898	20013	30736	20165	21703	129527	366601	363007	118105	75575	86280	63268	31517	35832	41991	29853	25225	91212.4	331	0.000165168	0.00183206	18	9	29253	0.0184844	0.670731	20	5.99999	291924	4.18e-05	0.0008059	19
332	125898	0.0210199	0.0507729	18	9	370.878	0.0174964	0.211033	20	6	1416.25	0.00327613	0.0123294	19	7.6	587.751	620.94	1.05647	175	100	97	162	1704	1170	1466	1325	243	252	163	80	103	129	134	148	465.688	332	0.00211966	0.0136402	18	9	299.283	0.313758	1	20	6	1678.5	0.0055304	0.0317151	19
333	125899	4.22e-05	0.000390745	18	9	6763.83	0.01537	0.211033	20	5.99999	33364	9.89e-06	0.000117379	19	7.59999	14040	15430.3	1.09902	2202	2326	1584	2089	35071	35668	31974	30743	7325	7678	5414	3437	2210	1782	4003	2602	11006.8	333	1.15e-05	0.000278046	18	9	12880	0.0263465	0.670731	20	6	39231	4.87e-06	0.000197856	19
334	125942	8.77e-05	0.000697384	24	9	1347.04	0.0161526	0.211033	20	5.99999	9400.75	2.05e-05	0.000203232	22	7.425	3659.54	4132.11	1.12913	946	1259	563	1549	10303	8701	10878	7721	2288	2233	1354	1701	1207	1125	780	396	3312.75	334	0.000339216	0.00314241	18	9	2018.08	0.0217704	0.670731	20	6	12284.2	9.46e-05	0.00132976	19
335	125960	8.77e-05	0.000697384	18	9	22323.4	0.0198278	0.211033	20	5.99999	79484.2	2.48e-05	0.000235212	19	7.6	34462.3	35317.8	1.02483	7673	8668	5763	5403	83449	69600	96376	68512	11445	22236	15584	9255	9428	12010	8013	6898	27519.6	335	7.55e-05	0.00109706	18	9	25526.6	0.049281	0.670731	20	6	79944	5.02e-05	0.000875362	19
338	127711	0.00980952	0.0282233	18	9	172.888	0.114178	0.357814	20	5.99998	864.25	0.00872996	0.0269573	19	7.59999	578.738	232.354	0.401483	399	341	406	443	793	637	1192	835	597	573	496	198	354	463	371	431	533.062	338	0.0326491	0.108787	18	6	230.87	0.32733	1	20	6.00001	955.5	0.0591926	0.202911	19
340	128049	0.00267199	0.0105751	18	12	2160.21	0.148162	0.424503	24.0327	12	11607.5	0.00349743	0.0130457	21.0163	12.2524	8796.54	4091.34	0.465108	7107	7675	7356	5171	12552	7365	10565	10140	9188	14237	13641	9364	7629	1975	7003	4687	8478.44	340	0.00211966	0.0136402	24	9	2717.76	0.146441	0.921265	20	6	12027	0.00281774	0.0191561	22
354	131202	0.000320124	0.00195554	18	9	1759.99	0.019688	0.211033	20	5.99999	6828.5	8.18e-05	0.000584195	19	7.6	2891.92	3033.69	1.04902	261	845	533	418	8282	6720	6049	6263	1233	1533	847	673	1086	812	505	669	2295.56	354	0.00359818	0.020495	24	9	810.344	0.0273427	0.670731	20	6	11363.5	0.00100614	0.00807785	22
356	131427	1.91e-05	0.000211771	18	9	624.552	0.0371524	0.221664	20	5.99998	2226.5	1.08e-05	0.000120244	19	7.59999	1014.47	993.43	0.979257	255	252	196	217	2584	2512	2728	1082	605	681	520	374	285	342	251	223	819.188	356	0.000339216	0.00314241	24	9	359.917	0.0337256	0.670731	20	6	2575.25	0.000141612	0.00186529	22
360	131511	0.000171384	0.00126734	18	9	513.36	0.0154923	0.211033	20	5.99999	2252.25	3.67e-05	0.000322662	19	7.6	938.681	1035.82	1.10348	156	95	189	171	2401	2009	2558	2041	392	361	421	320	172	223	143	109	735.062	360	8.88e-07	4.68e-05	18	9	568.16	0.0238411	0.670731	20	5.99999	2496	3.95e-07	7.32e-05	19
365	133612	0.000572095	0.00305238	24	9	116.673	0.0323528	0.211033	20	6	544	0.000220205	0.00130076	22	7.425	337.469	176.127	0.521906	225	215	177	256	390	588	628	570	380	321	246	315	253	189	167	243	322.688	365	0.00211966	0.0136402	18	9	107.48	0.412644	1	20	6	665.25	0.00703376	0.0382546	19
366	133616	0.000572095	0.00305238	18	9	162.635	0.0315505	0.211033	20	5.99998	467	0.000215197	0.00128661	19	7.59999	241.271	183.875	0.762111	53	127	101	84	349	547	567	405	161	198	146	99	111	85	106	143	205.125	366	0.00475081	0.0265227	18	9	115.258	0.692756	1	20	5.99998	602.5	0.022105	0.0913459	19
371	146231	8.88e-07	2.58e-05	18	9	2135.82	0.0282168	0.211033	20	6	6574.5	4.64e-07	1.56e-05	19	7.6	3625.66	2731.28	0.753319	1133	805	689	1213	6979	5991	7057	6271	2463	3041	2856	3078	1720	1794	1658	2672	3088.75	371	0.000339216	0.00314241	18	9	3815.9	0.617589	1	20.3951	5.99999	8729.5	0.0019841	0.0141745	19.1975
372	146259	0.0299489	0.066265	18	6	317.844	0.578285	0.99286	20	6.00001	1633	0.0875641	0.175336	19	6.01667	1232.13	449.782	0.365044	989	1209	199	1176	1221	1691	2044	1576	949	955	1173	1103	1168	1070	1256	1063	1177.62	372	0.0473038	0.140412	18	6	527.855	0.784579	1	20	5.99999	2440.25	0.159357	0.460062	19
373	146262	2.22e-07	1.25e-05	18	9	785.949	0.0153559	0.211033	20	5.99998	3231.25	6.99e-08	1.08e-05	19	7.59999	1380.08	1515.37	1.09803	228	181	173	165	3576	3135	3349	2865	707	828	609	499	291	238	230	241	1082.19	373	3.11e-05	0.000582233	18	9	848.175	0.130172	0.892155	20	6.00001	2999.5	5.43e-05	0.000875362	19
379	167348	2.22e-07	1.25e-05	18	9	83145.5	0.0405479	0.221664	20	6.00002	208770	1.76e-07	1.08e-05	19	7.60001	139501	79195.4	0.567705	44935	46945	65621	44064	238007	187665	215283	194125	113647	142898	147922	162085	86070	110112	91313	92235	123933	379	3.55e-06	0.000119774	18	9	41265.7	0.044284	0.670731	20	6	185047	2.62e-06	0.000129989	19
381	170278	4.22e-05	0.000390745	18	9	381.838	0.0472832	0.229079	20	6	944.75	2.82e-05	0.00025536	19	7.6	501.9	413.131	0.823133	148	129	110	184	1221	1044	941	573	291	687	363	263	266	163	172	176	420.688	381	0.0473038	0.140412	18	9	281.605	0.200126	1	20	6	982.75	0.0535814	0.187018	19
406	204696	2.22e-07	1.25e-05	18	9	4345.88	0.0302638	0.211033	20	6	10207.2	1.33e-07	1.08e-05	19	7.6	4930.2	4914.77	0.996871	629	649	637	836	14034	10973	6779	9043	3194	3789	3723	4182	1228	1173	1001	1555	3964.06	406	1.15e-05	0.000278046	18	9	1554.22	0.0287205	0.670731	20	6.00002	8785.5	5.28e-06	0.000202248	19
411	210259	7.77e-06	0.000128434	18	9	4713.22	0.0177145	0.211033	20	5.99999	22223.5	2.31e-06	4.78e-05	19	7.59999	9603.37	9996.32	1.04092	1332	1885	1396	1656	23953	19931	23190	21820	4326	5265	4734	2250	1859	2063	3910	2643	7638.31	411	7.55e-05	0.00109706	18	9	3706.3	0.0229321	0.670731	20	6	27647.2	2.47e-05	0.000561825	19
412	210272	0.00164724	0.00708482	18	9	8066.32	0.419778	0.825718	20	5.99999	21742.2	0.00572313	0.019454	19	7.6	13263.1	10167.3	0.766585	1367	1946	4452	3061	44172	12302	13064	17431	8564	26691	10524	11896	13308	5599	3439	2415	11264.4	412	0.022073	0.0809025	18	9	6600.31	0.489174	1	21.9098	6	16788.8	0.0596936	0.203732	19.9549
413	210291	4.22e-05	0.000390745	18	9	277469	0.0158583	0.211033	20	6	1.5594e+06	1.02e-05	0.000117548	19	7.6	646211	690121	1.06795	118812	113626	165054	123400	1393606	1757259	1453379	1633350	162292	238161	251581	180896	139672	132501	145035	160153	510549	413	0.00120413	0.0086759	18	9	472801	0.0250141	0.670731	20	6	3.26399e+06	0.000343681	0.00351696	19
414	210297	1.91e-05	0.000211771	18	9	58705.1	0.0150162	0.211033	20	5.99999	361704	4.61e-06	7.51e-05	19	7.59999	154224	165324	1.07197	27266	32113	21309	22022	374455	372041	361989	338330	77793	85171	65745	39074	35277	39588	30064	25368	121725	414	8.88e-07	4.68e-05	18	9	44641.1	0.0635969	0.670865	20	5.99998	186550	9.99e-07	8.42e-05	19
416	210405	0.00980952	0.0282233	18	6	436.992	0.0281726	0.211033	20	6	1009.75	0.0025408	0.00996231	19	6.01667	544.273	483.456	0.888261	341	304	215	272	851	1056	1126	1006	292	439	232	251	315	332	313	426	485.688	416	0.0326491	0.108787	18	6	385.373	0.220407	1	20	6.00001	1262.5	0.0427031	0.156749	19
417	210798	0.0121536	0.0348487	24	21	267.817	0.0860164	0.307254	20	17.9999	1344.75	0.00822043	0.0257614	22	19.525	1163.45	238.075	0.204628	1430	1312	1296	1429	927	889	722	943	969	1029	1164	1478	1367	1167	1367	1478	1185.44	417	0.0326491	0.108787	18	15	365.574	0.17349	0.986093	20	12	1335	0.034969	0.132192	19
423	210993	0.000320124	0.00195554	18	9	3546.49	0.0293523	0.211033	20	6	8593.75	0.000118161	0.000813862	19	7.6	3726.56	3731.02	1.0012	660	974	720	688	11461	6841	6818	9255	599	1863	1489	1792	1065	1133	1144	1388	2993.12	423	3.55e-06	0.000119774	18	9	1378.86	0.0244006	0.670731	20	6	10222.2	1.5e-06	9.01e-05	19
426	212396	0.0144977	0.0373749	24	21	1600.54	0.276301	0.648807	20	17.9999	12482	0.0261175	0.0641896	22	19.525	11086	1523.44	0.137421	13095	11055	13014	11428	10237	8228	7870	10070	12789	12941	8475	10496	13969	13217	11003	11739	11226.6	426	0.00359818	0.020495	24	18	2497.85	0.176631	0.986093	21.2339	17.9999	17588.5	0.00531385	0.030682	22.617
428	213019	1.91e-05	0.000211771	18	9	4652.41	0.0148925	0.211033	20	5.99999	24527	4.57e-06	7.51e-05	19	7.6	10045.9	11377.8	1.13258	1077	1075	874	2697	26948	23588	25701	21871	4447	4305	3473	2794	1693	1677	1341	1388	7809.31	428	0.022073	0.0809025	18	9	8937.83	0.0395474	0.670731	20	6	25408.8	0.00702156	0.0382546	19
429	215633	4.22e-05	0.000390745	18	9	6626.47	0.0763538	0.297992	20	6	18749.5	4.39e-05	0.000366815	19	7.6	10063.5	7488.55	0.744129	4586	3255	3072	3287	29112	14392	13646	17848	6390	10167	5602	6402	6626	5308	3569	4201	8591.44	429	0.0145863	0.0602758	18	9	1924.04	0.341062	1	20	6.00002	12490.2	0.0313582	0.121708	19
431	215656	0.0210199	0.0507729	24	15	2723.6	0.12432	0.382487	20.5594	12	15317.8	0.0181542	0.0481007	22.2797	13.4645	11528.1	4634.14	0.401987	10298	8083	9090	8218	12293	9537	9914	9530	13259	15369	18533	14110	12840	14956	8290	8305	11414.1	431	0.022073	0.0809025	18	0	2400.63	0.205651	1	23.6676	6.63e-05	15363.3	0.029029	0.114353	20.8338
435	215866	0.000572095	0.00305238	18	9	6055.31	0.102514	0.342159	20	5.99999	36594.8	0.000630108	0.00316179	19	7.59999	31028.1	6579.16	0.212039	27727	23619	22765	21993	43483	33202	36222	33472	29853	33889	34539	28142	25567	30220	25924	25140	29734.8	435	0.022073	0.0809025	18	6	7156.27	0.484365	1	20	6.00001	48924	0.0592124	0.202911	19
440	223080	0.000572095	0.00305238	18	9	13665.9	0.0165132	0.211033	20	5.99998	59078	0.000118749	0.000813862	19	7.59999	25786.5	27362.6	1.06112	4248	3766	2798	5163	60252	60141	62849	53070	16390	16404	14306	4770	7988	7855	3883	2639	20407.6	440	0.00120413	0.0086759	18	9	20406	0.0393203	0.670731	20	6	57700.2	0.000518825	0.00491427	19
444	223098	7.77e-06	0.000128434	18	9	18083	0.0227089	0.211033	20	5.99998	38915.5	2.92e-06	5.59e-05	19	7.59999	16259.3	18521.5	1.13913	2046	1294	1991	1043	27633	43273	49471	35285	8967	7384	7377	5869	3187	3722	1346	2006	12618.4	444	0.00940748	0.0424091	18	9	4295.67	0.423612	1	20	5.99999	30867	0.0260037	0.106413	19
447	223134	8.77e-05	0.000697384	18	9	2876.86	0.0360629	0.221664	20	5.99999	6065.5	4.32e-05	0.000364269	19	7.59999	2898.15	2546.19	0.878558	820	854	959	830	8832	5185	5068	5177	1601	2154	1378	1223	1500	817	960	1004	2397.62	447	1.15e-05	0.000278046	18	9	1438.61	0.266099	1	20	5.99998	6015.5	4.21e-05	0.0008059	19
449	223149	2.89e-06	6.76e-05	18	9	7490.38	0.0239114	0.211033	20	6	19006.2	1.21e-06	2.99e-05	19	7.6	10476	8306.88	0.792943	3846	3111	2379	2274	23075	19544	15761	17645	10098	10340	8838	6688	5455	5036	4468	2931	8843.06	449	0.00359818	0.020495	18	9	7958.84	0.22001	1	20	6	22379	0.00644502	0.0359811	19
451	223248	0.000320124	0.00195554	18	9	1412.8	0.0489076	0.234256	20	6	5950	0.00018889	0.00120632	19	7.6	4137.66	1741.52	0.420896	3101	2515	2779	2718	6806	5250	7045	4699	3879	3879	4511	3078	1231	3503	2800	2931	3795.31	451	0.0326491	0.108787	24	9	1500.83	0.0422375	0.670731	20	6	8635.5	0.0104617	0.0515746	22
453	223335	0.000171384	0.00126734	18	9	724.077	0.0566675	0.250108	20	6.00001	2385.5	0.000121808	0.0008281	19	7.60001	1171.69	1020.94	0.871336	340	391	260	303	2918	1088	3032	2504	461	1115	767	588	595	499	329	346	971	453	0.00590343	0.0294473	18	9	315.723	0.530894	1	20	6.00002	2104	0.0212035	0.088232	19
455	223946	0.00164724	0.00708482	24	12	363.806	0.0687927	0.280156	24.8451	12	1325.25	0.00114285	0.00520769	24.4225	12.0036	1036.25	394.528	0.380727	454	758	664	826	1341	1364	1271	898	1321	1440	1433	1107	1175	1085	820	711	1041.75	455	0.00590343	0.0294473	18	9	252.437	0.211797	1	20	6	1180.75	0.00960796	0.0482114	19
459	224423	0.0299489	0.066265	18	9	992.778	0.0256371	0.211033	20	6	4515.75	0.00627448	0.0211575	19	7.6	2429.37	1542.95	0.635123	1381	735	2037	1042	5337	4459	4747	3520	1395	1425	1479	1225	1017	1295	1201	1722	2126.06	459	0.0473038	0.140412	24	9	1080.46	0.0264096	0.670731	20	6	5617.75	0.0096009	0.0482114	22
462	225754	0.0419656	0.0867083	24	6	1725.69	0.0312353	0.211033	20	6	19088.5	0.0100108	0.0299259	22	6.05	7648.43	10646	1.39191	4167	2806	4344	2160	23236	23281	19627	10210	4169	3241	1994	1822	2913	2940	1995	2904	6988.06	462	0.00940748	0.0424091	18	9	7348.25	0.0413826	0.670731	20	6	33011.5	0.0034458	0.0221741	19
489	250811	0.000572095	0.00305238	24	9	174056	0.027328	0.211033	20	6	444254	0.000188643	0.00120632	22	7.425	211346	204097	0.965698	161205	98603	13844	12127	418152	565378	406558	386930	104765	233589	269746	171179	94871	67285	81003	22240	194217	489	0.000654457	0.00551707	24	9	80314.2	0.186524	0.995191	20	6	721205	0.00122205	0.00953879	22
495	335967	1.91e-05	0.000211771	24	9	976.514	0.0146727	0.211033	20	5.99999	6668.5	4.51e-06	7.51e-05	22	7.425	3692.46	2195.7	0.594645	2586	2601	2278	2179	7525	5968	7175	6006	2816	2990	2732	2958	2393	1928	2403	1593	3508.19	495	0.022073	0.0809025	18	6	2438.1	0.0699924	0.710887	20	6	7464.75	0.011545	0.0546767	19
512	346701	7.77e-06	0.000128434	18	9	1559.88	0.0148717	0.211033	20	5.99999	8518.5	1.96e-06	4.59e-05	19	7.6	3405.15	3995.99	1.17351	428	443	335	261	8899	9062	8422	7691	1352	1565	1092	580	488	524	432	340	2619.62	512	0.000654457	0.00551707	18	9	1807.72	0.0886005	0.781214	20	6	14318.5	0.00062365	0.00553407	19
537	370158	1.91e-05	0.000211771	18	9	670.337	0.0180415	0.211033	20	5.99998	2897.5	5.47e-06	8.08e-05	19	7.59999	1379.84	1237.9	0.897133	332	256	391	510	2826	2753	3310	2701	623	809	768	904	522	405	386	688	1136.5	537	7.55e-05	0.00109706	18	9	943.104	0.0529117	0.670731	20	6.00001	2460.5	5.36e-05	0.000875362	19
539	370904	8.88e-07	2.58e-05	18	9	278.954	0.0422644	0.223696	20	6	824.75	6.79e-07	2.12e-05	19	7.6	507.636	304.009	0.598871	129	234	185	272	957	824	630	888	467	490	341	460	338	276	351	324	447.875	539	0.0326491	0.108787	18	9	197.46	0.185235	0.995191	20	5.99998	777.25	0.0369402	0.13779	19
543	376826	0.000171384	0.00126734	18	9	960.251	0.032026	0.211033	20	6.00001	3324.75	7.2e-05	0.000536931	19	7.60001	1930.85	1165.75	0.60375	686	745	994	1143	3567	2872	3109	3751	1220	1543	1153	1688	1371	1045	846	1494	1701.69	543	0.000339216	0.00314241	24	9	745.467	0.0372118	0.670731	20	6.00001	2614	0.000155009	0.00201034	22
545	377213	0.000320124	0.00195554	24	9	4234.16	0.0168175	0.211033	23.6461	6	10991.8	7.07e-05	0.000536931	23.8231	7.48927	7319.18	4389.23	0.599689	5054	4114	3976	4374	12951	10409	10512	10095	7499	9918	10983	8910	4100	6106	3601	3974	7286	545	7.55e-05	0.00109706	24	9	2523.31	0.0889638	0.781214	20.7018	6	9553.5	8.67e-05	0.00126012	22.3509
557	381214	2.22e-07	1.25e-05	18	9	1205.26	0.0438369	0.223696	20	6.00001	3047.75	1.89e-07	1.08e-05	19	7.60001	1743.79	1363.52	0.78193	424	284	419	457	4045	2808	3212	2126	1892	2071	1189	1395	909	950	865	566	1475.75	557	0.000165168	0.00183206	18	9	875.752	0.184915	0.995191	20	6	2626.75	0.00034807	0.00351696	19
562	384832	2.22e-07	1.25e-05	18	9	1223.65	0.0212893	0.211033	20	6	2955.25	9.53e-08	1.08e-05	19	7.6	1523.53	1451.85	0.952954	141	191	229	221	3539	2792	3193	2297	1095	1426	1720	1204	452	587	398	325	1238.12	562	3.11e-05	0.000582233	18	9	777.817	0.0554782	0.670731	20	6	1884.25	2.46e-05	0.000561825	19
565	385011	0.00980952	0.0282233	24	12	14052.3	0.0618401	0.263289	24.4321	12	74902.2	0.00510024	0.0178403	24.2161	12.001	64289.4	15986.1	0.248658	56976	53829	47500	47143	77056	69102	76311	69689	66670	81048	83948	67943	63034	68419	55746	46034	64403	565	0.022073	0.0809025	18	6	13064.7	0.262246	1	20	6	87496.8	0.0356105	0.133421	19
569	390122	0.00980952	0.0282233	18	9	42213.7	0.516958	0.933181	20	6.00002	130640	0.0318679	0.0744172	19	7.60001	84652.3	52837.4	0.624171	17479	55045	27912	24701	253770	76777	79950	112065	41155	155585	64694	89737	88635	37580	23999	39165	74265.6	569	0.0326491	0.108787	18	9	36515.3	0.541332	1	22.0267	6	99512.2	0.0890003	0.285275	20.0133
572	390140	0.0144977	0.0373749	18	9	2360.15	0.338	0.730599	20	6	12478	0.0309619	0.0727565	19	7.6	9788.25	2505.99	0.256021	6959	6291	8657	7029	9823	13975	15624	10490	7508	7747	8852	12244	6440	8392	8743	9956	9295.62	572	0.0473038	0.140412	18	9	4401.03	0.958686	1	20	6	126193	0.185632	0.511397	19
573	390179	1.91e-05	0.000211771	18	9	3597.05	0.0160433	0.211033	20	5.99999	19504.8	4.9e-06	7.79e-05	19	7.59999	8364.71	8910.39	1.06524	833	1805	1510	1079	18169	20343	20787	18720	4107	4094	4182	2427	1144	2243	2804	1563	6613.12	573	0.000339216	0.00314241	18	9	2602.86	0.109581	0.828354	20	6	17424	0.000416323	0.00408093	19
578	391889	2.89e-06	6.76e-05	18	9	521.138	0.0796621	0.298914	20	6.00001	1427.5	3.74e-06	6.83e-05	19	7.6	818.861	602.426	0.735687	285	152	276	202	989	1798	1888	1035	689	500	876	810	359	738	318	292	700.438	578	0.0326491	0.108787	18	9	233.168	0.175102	0.986093	20	6	1616.25	0.035241	0.132626	19
579	393358	4.22e-05	0.000390745	18	9	280116	0.0157481	0.211033	20	6	1.57185e+06	1.01e-05	0.000117548	19	7.6	649085	696977	1.07378	118044	113202	163408	124387	1405246	1773898	1461206	1647037	160056	235977	249850	179370	136181	129459	141920	153953	512075	579	0.000165168	0.00183206	18	9	527410	0.0244092	0.670731	20	6	3316581	5.41e-05	0.000875362	19
597	403865	8.77e-05	0.000697384	18	9	473.408	0.0177744	0.211033	20	5.99999	1695.25	2.24e-05	0.000218931	19	7.59999	750.93	751.253	1.00043	160	219	116	180	1843	1508	1979	1451	341	363	431	274	176	257	208	146	603.25	597	0.00475081	0.0265227	24	9	184.201	0.0415118	0.670731	20	6	1712.5	0.0018797	0.0135727	22
603	416597	0.000987235	0.00470192	24	9	380.777	0.0217557	0.211033	20	5.99999	2220.25	0.000252334	0.00145697	22	7.42499	981.674	920.293	0.937473	339	370	444	390	2519	2524	1542	2296	562	871	755	383	422	347	319	388	904.438	603	0.022073	0.0809025	18	9	764.559	0.0541262	0.670731	20	6	2778.75	0.00923506	0.0471828	19
617	458481	4.22e-05	0.000390745	18	9	3240.67	0.0669983	0.274912	20	6.00001	12007.8	3.89e-05	0.000338353	19	7.60001	5983.23	5097.76	0.852008	2196	1658	1819	1529	15089	13718	14852	4372	4113	4190	4029	3121	1996	2533	2963	1520	4981.12	617	0.00940748	0.0424091	24	9	1118.29	0.0570338	0.670731	20	6	14129.2	0.00457692	0.027432	22
619	472871	0.00980952	0.0282233	18	9	14143.2	0.221563	0.574701	20	6	42385.2	0.0154997	0.0425611	19	7.6	25385.5	16392.4	0.645741	11622	12265	11064	7489	49807	53775	58973	6986	24883	21466	22821	19693	12173	17767	11858	11967	22163.1	619	3.55e-06	0.000119774	18	9	22459.5	0.385172	1	20	6.00001	91518	1.98e-05	0.000491933	19
623	474221	8.77e-05	0.000697384	18	9	4454.07	0.0340237	0.214044	20	6	13156	4.09e-05	0.000348621	19	7.6	8426.28	4675.16	0.55483	3802	4382	4639	4580	17325	11665	12469	11165	6499	9818	7499	7183	5483	5370	3896	4341	7507.25	623	3.11e-05	0.000582233	18	9	2341.23	0.244431	1	20	6	12517	9.71e-05	0.00134255	19
627	480021	0.000987235	0.00470192	18	9	721.602	0.018193	0.211033	20	6	3004.5	0.000214224	0.00128661	19	7.6	1356.71	1242.29	0.915666	277	516	430	439	3161	3389	3038	2430	453	732	540	511	521	405	506	452	1112.5	627	0.00359818	0.020495	24	9	616.597	0.0549419	0.670731	20	6	3606.75	0.00188376	0.0135727	22
628	480022	8.77e-05	0.000697384	18	9	1256.18	0.145208	0.422106	20	6	4044.5	0.000156255	0.00105378	19	7.6	2007.09	1875.03	0.934206	229	323	400	247	1342	5410	6346	3080	1464	1917	572	1993	631	918	795	549	1638.5	628	0.000165168	0.00183206	18	9	726.906	0.208718	1	20	6	2507.75	0.0003887	0.00385499	19
629	484364	1.91e-05	0.000211771	18	9	1316.28	0.0214776	0.211033	20	6	3223.25	6.44e-06	8.62e-05	19	7.6	1621.19	1408.5	0.868806	575	358	431	467	3590	2943	3780	2580	1419	1326	766	1039	636	240	698	661	1344.31	629	0.00940748	0.0424091	18	9	1061.19	0.197513	1	20	6.00002	3483	0.0135422	0.062383	19
632	509927	0.0065055	0.0205398	24	21	535.103	0.123119	0.38018	27.1385	17.9999	2668.74	0.00651148	0.021611	25.5692	19.6661	1564.65	741.503	0.473909	1273	874	1513	1535	809	800	863	1117	595	1301	1056	1890	1841	2338	2579	3917	1518.81	632	0.0473038	0.140412	24	18	970.504	0.164794	0.971476	28	17.9999	3756.74	0.0456358	0.163706	26
637	513549	4.22e-05	0.000390745	18	9	6200.62	0.0153396	0.211033	20	5.99999	27253.2	9.87e-06	0.000117379	19	7.59999	10990.2	12953.5	1.17864	1230	1054	995	841	29680	25669	29112	24552	5476	5226	3993	1966	197	1829	1983	1298	8443.81	637	0.00120413	0.0086759	18	9	6835.6	0.0639649	0.670865	20	6	28261	0.000806529	0.00677887	19
639	513601	0.0144977	0.0373749	18	9	991.364	0.719683	1	20	5.99999	4560	0.05804	0.125135	19	7.6	3691.28	1022.32	0.276956	1741	3693	1188	3276	5271	3712	5051	4206	1829	4398	4128	4631	1791	3028	3971	3931	3490.31	639	0.0145863	0.0602758	18	6	7903.33	0.215382	1	20	6	24713.8	0.0212468	0.088232	19
652	1-docosanol	0.000572095	0.00305238	24	0	985.53	0.249205	0.616071	24.7059	6.63e-05	2309.74	0.00140512	0.00610574	24.3529	3.27e-05	1202.57	1265.98	1.05273	2313	1930	1911	3085	636	453	512	440	422	188	497	346	803	458	935	4087	1188.5	652	0.0145863	0.0602758	24	21	797.263	0.510448	1	23.5328	6.63e-05	1493	0.0439297	0.158939	23.7664
654	1-kestose	1.91e-05	0.000211771	18	9	5402.65	0.0145567	0.211033	20	5.99999	36247.2	4.47e-06	7.51e-05	19	7.6	15136.8	16506.1	1.09046	2603	2864	2697	2228	37503	38343	35063	34080	6268	6888	6695	3474	3422	2187	2926	3032	11892.1	654	0.000654457	0.00551707	18	9	3336.13	0.125281	0.870317	20	5.99999	24582	0.000853434	0.0069849	19
659	2-hydroxyglutaric acid	0.00980952	0.0282233	18	9	50925.1	0.105163	0.346297	20	5.99998	218212	0.00812551	0.025559	19	7.59999	136670	64867.6	0.47463	92390	83363	85642	44864	298572	225292	188566	160418	102919	125908	81440	90030	117950	115056	81033	89250	123918	659	0.000339216	0.00314241	18	9	61554.4	0.135008	0.907467	20	6.00002	246400	0.000503367	0.00482203	19
661	6-anhydro-D-galactose	8.88e-07	2.58e-05	18	9	4262.79	0.0165292	0.211033	20	6.00002	18185.5	2.79e-07	1.08e-05	19	7.60001	8576.85	7992.24	0.931838	1892	1755	2466	2013	17216	18747	20020	16759	4819	4992	4941	5186	3249	3274	2079	2684	7005.75	661	3.55e-06	0.000119774	18	9	7321.38	0.112971	0.828354	20	5.99999	32724.5	6.31e-06	0.000231329	19
664	3-aminoisobutyric acid	0.00267199	0.0105751	18	9	677.232	0.184497	0.501713	20	5.99998	2216.5	0.00424701	0.015432	19	7.59999	1560.32	698.862	0.447897	535	470	1016	1282	2464	1966	1905	2531	1018	1586	1432	2028	1756	778	554	1446	1422.94	664	0.0473038	0.140412	18	9	660.791	0.507754	1	20	6.00001	3173.25	0.113583	0.34693	19
666	3-phosphoglycerate	0.00421867	0.0149426	18	0	8060.66	0.0610472	0.261232	23.2718	17.9999	23139.2	0.00238592	0.00941287	20.6359	18.2985	16537.6	7722.67	0.466976	23346	23179	22937	23804	4789	10499	10045	14498	18066	13119	6680	19292	20197	19109	25292	27959	17675.7	666	0.0326491	0.108787	24	21	10071.1	0.399261	1	22.6301	17.9999	25103.9	0.0696107	0.230125	23.3151
667	5-dihydroxy-7-glucosyloxyflavanone	0.0065055	0.0205398	24	9	338.351	0.0255497	0.211033	20	6	3764.25	0.00161264	0.00687109	22	7.425	1498.29	1532.3	1.0227	614	432	716	482	4871	3446	4209	2531	780	640	891	291	572	599	462	379	1369.69	667	0.00940748	0.0424091	18	6	2448	0.0252698	0.670731	20	6	4623.25	0.0022214	0.0154459	19
668	4-aminobutyric acid	1.91e-05	0.000211771	18	9	4270.04	0.0330952	0.211033	20	6	13173.5	9.65e-06	0.000117379	19	7.6	8596.6	4505.73	0.524129	3984	4382	5325	4580	16936	11766	12590	11402	7295	9523	7531	7217	6212	5559	4193	4879	7710.88	668	0.0473038	0.140412	18	9	1549.27	0.988666	1	23.1373	6	7828.75	0.189997	0.516668	20.5686
669	5-hydroxymethyl-2-furoic acid	0.000320124	0.00195554	18	9	549.422	0.0180981	0.211033	20	5.99999	2327.25	7.57e-05	0.000552225	19	7.6	1010.67	1026.84	1.01601	115	164	283	269	2240	2099	2225	2745	348	496	411	430	440	187	149	340	808.812	669	0.00211966	0.0136402	18	9	541.997	0.161822	0.971476	20	6	2092	0.00307944	0.0205172	19
672	aconitic acid	2.89e-06	6.76e-05	18	9	57654.7	0.0159182	0.211033	20	6	224875	8.22e-07	2.3e-05	19	7.6	84014.1	108630	1.29299	2223	2011	2211	1790	243497	222028	249098	184876	25233	22000	19430	12114	5708	4094	2192	4054	62659.9	672	7.55e-05	0.00109706	18	9	81676.8	0.0271777	0.670731	20	6	285963	2.89e-05	0.000625078	19
673	adenine	0.0419656	0.0867083	18	15	7069.65	0.0377925	0.221664	20	12	31468.2	0.0118101	0.0344495	19	13.6167	19263.9	12257.3	0.636284	14628	12670	18164	17329	19891	11352	9785	8056	25817	29779	34410	35867	15300	19564	15902	17809	19145.2	673	0.0145863	0.0602758	18	15	5042.02	0.125196	0.870317	20	12	14904.2	0.013341	0.0617938	19
683	asparagine	0.000987235	0.00470192	18	0	63038.9	0.071772	0.286748	20	17.9999	495005	0.000747873	0.00364426	19	18.05	456484	56446	0.123654	548001	480605	566736	492426	396677	379147	390791	362839	469151	459514	469659	504402	481486	469405	504546	524585	468748	683	0.00120413	0.0086759	18	0	74962.5	0.198815	1	20	17.9999	466354	0.00223536	0.0154459	19
684	aspartic acid	0.0144977	0.0373749	18	0	127545	0.148551	0.424503	20	17.9999	902711	0.0153783	0.0423658	19	18.05	806402	125299	0.155381	969408	970730	947158	888209	789693	594654	627642	623342	819975	948815	799561	747994	1038686	969803	784907	817449	833627	684	0.00940748	0.0424091	18	0	127816	0.462531	1	20	17.9999	665651	0.0280103	0.110866	19
686	behenic acid	0.000572095	0.00305238	24	12	7503.46	0.0905934	0.314281	25.2722	12	19576.8	0.000563245	0.00286033	24.6361	12.008	13520.9	9006.06	0.666085	5212	6592	2885	3089	30249	12619	17784	14754	16136	19931	22005	20235	11481	14254	15678	6464	13710.5	686	0.0473038	0.140412	24	6	12966.2	0.0633774	0.670865	20	6.00001	39865.8	0.0204158	0.0860525	22
702	citrulline	0.0065055	0.0205398	18	0	40735	0.181086	0.495959	23.52	17.9999	220017	0.00912271	0.0278902	20.76	18.3238	194018	40376.7	0.208108	253471	204162	232585	255417	146875	150080	198330	141135	170698	158826	197488	206744	170403	225101	255682	228882	199742	702	0.000654457	0.00551707	24	21	54465.4	0.116842	0.834728	21.1253	18	280247	0.000801281	0.00677887	22.5627
704	cryptochlorogenic acid	2.89e-06	6.76e-05	18	9	239.002	0.0169259	0.211033	20	6	1267.25	8.71e-07	2.3e-05	19	7.6	524.18	568.436	1.08443	67	89	71	110	1449	1156	1266	1198	209	204	164	124	118	138	125	111	412.438	704	0.000165168	0.00183206	18	9	204.354	0.0224235	0.670731	20	6	1571.5	5e-05	0.000875362	19
709	cystine	0.0144977	0.0373749	18	0	26670.5	0.286256	0.662949	20	17.9999	118978	0.0269116	0.0653789	19	18.05	99860.8	28339.3	0.283788	172213	139938	133438	87984	85728	61863	54936	60716	102123	125096	103266	93078	158753	113993	111214	91953	106018	709	0.00940748	0.0424091	24	21	39257.5	0.104076	0.828354	20	17.9999	149379	0.00776311	0.0411591	22
714	erythritol	0.0065055	0.0205398	18	9	1718.62	0.07304	0.290437	20	6	5192.25	0.00411103	0.0150026	19	7.6	3308.16	1724.38	0.521249	1271	1538	1970	2061	4975	4695	4423	6676	1799	2537	2646	4242	1910	1947	1801	3016	2969.19	714	0.022073	0.0809025	18	9	1270.32	0.226367	1	20	5.99998	5607.25	0.0314736	0.121708	19
715	erythrose	1.91e-05	0.000211771	18	9	194.101	0.0376683	0.221664	20	6	730.5	1.09e-05	0.000120244	19	7.6	501.831	234.416	0.467121	266	254	394	267	850	860	541	671	461	478	488	499	381	276	268	338	455.75	715	0.000339216	0.00314241	18	9	228.572	0.942842	1	20	6	5106.5	0.00289371	0.0195152	19
718	fructose	7.77e-06	0.000128434	18	9	22707.7	0.230562	0.584673	20	6.00002	95784.2	2.55e-05	0.000238822	19	7.60001	44180.7	42366.3	0.958931	10526	6352	9293	6619	109143	51176	184879	37939	16546	30328	27711	20393	10935	20594	17906	13299	35852.4	718	1.15e-05	0.000278046	18	9	17149.5	0.0551869	0.670731	20	5.99999	59794.2	9.73e-06	0.000292818	19
720	fucose	0.0419656	0.0867083	18	9	233.168	0.24397	0.612102	23.7736	6.00002	807.25	0.0571464	0.123524	20.8868	7.85742	637.314	225.344	0.353584	244	492	448	521	1106	563	633	927	728	849	468	882	638	368	325	517	606.812	720	0.00940748	0.0424091	18	9	198.343	0.29729	1	20	6	927.25	0.0192397	0.0823302	19
722	galactinol	0.0419656	0.0867083	18	6	5727.92	0.0875898	0.311554	20	6	15746.8	0.024282	0.0598623	19	6.01666	9288.26	6853.49	0.737866	2824	8093	3415	6314	20535	13607	14251	14594	6787	7917	4715	4577	7954	4724	8781	6236	8457.75	722	0.022073	0.0809025	18	6	6598.37	0.13525	0.907467	20	5.99999	16449	0.0203425	0.0860525	19
725	gluconic acid lactone	0.00421867	0.0149426	18	9	1525.05	0.0331181	0.211033	20	5.99999	6340.25	0.00137981	0.00602682	19	7.6	3719.55	2033.79	0.546783	2091	1457	2148	2331	6171	6743	6717	5730	2441	1262	2746	3565	2192	2407	2115	3000	3319.75	725	0.00590343	0.0294473	18	9	2412.65	0.0588779	0.670731	20	6	8977.75	0.0031159	0.0205211	19
726	glucose	2.22e-07	1.25e-05	18	9	502333	0.0380078	0.221664	20	6.00002	1.31835e+06	1.65e-07	1.08e-05	19	7.60001	885150	487593	0.550859	366937	338307	410330	257219	1371382	1239756	1429553	1232690	749254	843490	988346	973407	480267	718050	671290	558525	789300	726	3.11e-05	0.000582233	18	9	216111	0.046313	0.670731	20	6	1.09472e+06	2.08e-05	0.000501014	19
733	glycerol	0.0210199	0.0507729	24	9	76234.1	0.0239158	0.211033	20	6	379058	0.00432103	0.0156336	22	7.425	249761	95628.5	0.38288	204293	210521	189084	201286	445849	366029	349373	354983	206095	218642	241076	196669	138236	214576	110687	220362	241735	733	0.00211966	0.0136402	18	9	88680.7	0.323643	1	20	6.00001	491446	0.00568334	0.0321548	19
734	glycerol-alpha-phosphate	0.000171384	0.00126734	18	9	19322.8	0.0284428	0.211033	20	6.00001	75505.2	6.45e-05	0.000508153	19	7.60001	48170.9	23037.5	0.478245	31848	32252	27695	21163	83950	67964	80907	69200	41175	44254	34578	32727	33464	38586	30671	27842	43642.2	734	0.0326491	0.108787	18	9	19786.6	0.38912	1	20	6	79068	0.0681695	0.227109	19
735	glycine	0.0299489	0.066265	18	0	97597.2	0.290837	0.671689	20	17.9999	1.08945e+06	0.0500253	0.110686	19	18.05	1.02856e+06	87637.8	0.0852043	1083764	1113319	1203317	1120583	986170	939846	839102	918945	1066330	1100628	969094	1062719	1205757	1054910	936398	1160747	1.0476e+06	735	0.00359818	0.020495	18	0	128471	0.142418	0.921265	20	17.9999	1.00292e+06	0.00439491	0.0270431	19
742	homoserine	0.000320124	0.00195554	18	9	3555.33	0.0165132	0.211033	24.7059	12	7922.5	6.95e-05	0.000536931	21.3529	10.524	5879.35	3070.93	0.522325	705	2509	2792	2348	6993	7811	8618	7546	6824	7359	8168	9339	3656	4649	4699	4613	5539.31	742	0.0326491	0.108787	24	12	1877.19	0.260232	1	21.0178	12	6004.75	0.0490079	0.172834	22.5089
745	inosine	0.0144977	0.0373749	18	9	55384.8	0.145166	0.422106	24.0327	5.99999	338684	0.0150764	0.0418074	21.0163	7.87755	297987	57327.5	0.192383	274414	267730	210696	205783	398502	353710	258644	343880	330380	354365	308963	308078	277767	284009	261721	209617	290516	745	0.022073	0.0809025	18	9	44966	0.330015	1	20	6	395293	0.0431385	0.156749	19
747	inulotriose	0.0299489	0.066265	18	9	174.832	0.0709408	0.286139	20	6	2150	0.0151998	0.0420112	19	7.6	1046.9	724.396	0.691944	2419	271	208	206	2564	2052	1966	2018	512	530	297	288	213	312	306	310	904.5	747	0.000165168	0.00183206	18	9	385.727	0.116766	0.834728	20	5.99999	2252.75	0.000228658	0.0027176	19
748	isochlorogenic acid	0.000171384	0.00126734	18	9	465.63	0.0206109	0.211033	20	5.99999	1436.75	4.79e-05	0.000395684	19	7.6	604.249	648.591	1.07338	107	163	71	80	1726	1172	1648	1201	256	257	211	205	96	95	224	116	476.75	748	0.000165168	0.00183206	18	9	583.717	0.0376562	0.670731	20	6	1606	8.08e-05	0.00119468	19
749	isoleucine	0.0299489	0.066265	18	0	345111	0.0393779	0.221664	20	17.9999	4.64169e+06	0.00913131	0.0278902	19	18.05	4.31016e+06	358921	0.0832733	4449344	4650459	4610988	4809770	4015794	3683771	3528621	3743836	4352298	4833347	4384031	4581317	4896511	4569001	4448450	4652788	4.38815e+06	749	0.0473038	0.140412	18	0	415237	1	1	21.4545	5.99999	4.48786e+06	0.191636	0.517784	19.7273
750	isomaltose	7.77e-06	0.000128434	18	9	8404.32	0.0514042	0.2387	23.6461	6.00001	18596.2	6.28e-06	8.62e-05	20.8231	7.84761	11648	7744.86	0.664908	2837	2310	3453	3077	23200	14661	18699	17825	9261	13302	14784	15467	5600	9776	8433	6607	10580.8	750	0.000165168	0.00183206	18	9	4288.78	0.135636	0.907467	20	5.99999	12116.8	0.000262253	0.00298297	19
751	isoribose	1.91e-05	0.000211771	18	9	1035.91	0.0246766	0.211033	20	6	3787.25	7.33e-06	9.65e-05	19	7.6	2071.76	1501.36	0.724679	503	706	906	826	3575	3581	4096	3897	1391	1947	1674	1076	942	789	929	1588	1776.62	751	3.11e-05	0.000582233	18	9	1088.94	0.140357	0.917215	20	6.00001	4894.75	5.82e-05	0.00090148	19
752	isothreonic acid	0.000572095	0.00305238	18	9	883.53	0.050258	0.23669	20	6.00002	3057.5	0.00032941	0.00181498	19	7.60001	1838.6	1036.98	0.564007	735	828	994	1143	3478	2810	2191	3751	1220	1543	1119	1736	1437	991	846	1334	1634.75	752	0.00120413	0.0086759	18	9	559.675	0.0644603	0.670865	20	6	2454.75	0.000812177	0.00677887	19
755	lactulose	1.91e-05	0.000211771	18	9	4645.69	0.0183461	0.211033	20	5.99999	22223.5	5.56e-06	8.08e-05	19	7.59999	9567.61	10000.7	1.04527	1332	1885	921	1656	23953	19931	23190	21820	4326	5265	4311	2250	1859	2375	3910	2643	7601.69	755	0.000165168	0.00183206	18	9	3706.3	0.0220954	0.670731	20	6	27647.2	4.93e-05	0.000875362	19
756	lauric acid	0.0419656	0.0867083	18	9	11477.2	0.0575145	0.252524	20	6	42503.5	0.0169597	0.045971	19	7.6	23454.8	14220.3	0.606284	16171	12299	9406	7622	55188	42011	41156	31659	21131	15377	11182	7215	19308	15284	14506	11036	20659.4	756	0.00120413	0.0086759	18	9	20607.6	0.34542	1	20	5.99999	96528.8	0.00365395	0.0229871	19
760	linoleic acid	0.000320124	0.00195554	18	6	1035.56	0.0211553	0.211033	20	6.00001	1932.75	8.74e-05	0.000613852	19	6.01667	901.013	1018.73	1.13065	227	813	392	496	2216	1903	1941	1671	301	274	109	159	525	438	471	505	777.562	760	0.0119969	0.0537946	18	6	368.403	0.362732	1	20	6	1931.75	0.0280125	0.110866	19
762	lyxitol	1.91e-05	0.000211771	18	9	3385.63	0.0388775	0.221664	20	6	9509	1.12e-05	0.000121241	19	7.6	5624.78	3654.55	0.649723	1575	1859	2459	2555	8583	8258	10357	10838	3250	4711	4803	6090	2992	2482	2745	4945	4906.38	762	0.00940748	0.0424091	18	9	2572.81	0.0511694	0.670731	20	5.99999	7532.5	0.00415854	0.0259678	19
764	malic acid	0.0065055	0.0205398	18	9	27291.1	0.122681	0.38018	20	6	169909	0.00649118	0.021611	19	7.6	135205	31301.3	0.231509	85830	122838	95493	112815	164487	148312	165872	200966	127405	142135	120192	109568	128174	120229	99791	120730	129052	764	3.55e-06	0.000119774	18	9	32900.3	0.316824	1	20	6.00001	214776	1.65e-05	0.000435723	19
767	maltose	2.22e-07	1.25e-05	18	9	377125	0.018208	0.211033	20	5.99998	1.11074e+06	8.22e-08	1.08e-05	19	7.59999	448196	538530	1.20155	16855	15893	17407	19667	1221266	877750	1111755	1232208	278237	202885	106457	145737	37932	64055	71855	57370	342333	767	8.88e-07	4.68e-05	18	9	831299	0.0430325	0.670731	20	5.99999	2.10121e+06	6.91e-07	8.32e-05	19
768	maltotriose	0.000572095	0.00305238	18	9	3012.98	0.0301332	0.211033	20	6	7764.5	0.000206323	0.00126956	19	7.6	3048.08	3503.8	1.14951	218	293	363	495	8266	4789	7616	10387	613	848	647	582	415	779	621	817	2359.31	768	8.88e-07	4.68e-05	18	9	1800.65	0.144723	0.921265	20	6	21607.8	2.17e-06	0.000114209	19
769	mannose	1.91e-05	0.000211771	18	9	128903	0.0188902	0.211033	20	5.99999	517674	5.71e-06	8.16e-05	19	7.6	235848	217384	0.921713	61657	72478	65116	64717	447045	540675	605929	477045	116956	122396	109972	74446	100511	78270	86213	66414	193115	769	0.00120413	0.0086759	18	9	105704	0.020301	0.670731	20	6	753804	0.000284029	0.00310956	19
776	montanic acid	0.0210199	0.0507729	24	3	398.101	0.0901295	0.313963	20	6	1687.75	0.0137708	0.039035	22	4.675	1379.52	340.754	0.247009	1648	1538	1182	2044	1588	1760	1778	1625	1066	722	1139	562	1084	1049	1554	1566	1369.06	776	7.55e-05	0.00109706	18	9	804.334	0.259725	1	20	6	3419	0.000232108	0.0027176	19
777	myo-inositol	2.22e-07	1.25e-05	18	9	22107.5	0.0275705	0.211033	20	6	81008.2	1.22e-07	1.08e-05	19	7.6	49243.9	29000.7	0.58892	21713	22038	22732	18287	86240	80593	76041	81159	37346	49525	36914	37861	34011	33497	30281	28450	43543	777	0.00940748	0.0424091	18	9	17293.7	0.594007	1	20	6	80559.8	0.0345743	0.131289	19
778	myristic acid	0.0299489	0.066265	18	6	14835.1	0.175924	0.486241	20	6	31155	0.0329083	0.0764233	19	6.01667	18835.5	10980.8	0.582982	11377	43044	9191	7424	31373	30387	28399	34461	12074	10300	8381	6139	13161	11719	10784	11864	17504.9	778	0.0473038	0.140412	18	6	6840.9	0.665729	1	20	6	34769.2	0.14039	0.416722	19
788	octadecylglycerol	0.0299489	0.066265	18	9	2435.63	0.0177553	0.211033	20	6	18554.8	0.00454082	0.016289	19	7.6	8517.97	7441.56	0.873631	3231	1257	1614	6028	20098	18521	17300	18300	4272	3819	3333	2565	2898	2292	2640	4714	7055.12	788	0.0326491	0.108787	18	6	12883.7	0.0265074	0.670731	20	6	22229.8	0.00696877	0.0382546	19
789	oleamide	0.00815751	0.0256596	18	9	699.505	0.270552	0.642465	20	5.99999	4599.25	0.0157055	0.0428469	19	7.59999	3859.73	794.408	0.20582	3527	2756	2352	3429	4961	4506	5346	3584	4082	4377	3522	3291	3805	3584	2981	3154	3703.56	789	0.0473038	0.140412	18	9	1274.21	0.42886	1	20	6.00002	6295.5	0.09936	0.312539	19
793	palmitoleic acid	0.00421867	0.0149426	18	6	4439.04	0.016538	0.211033	20	6	8677.75	0.000737474	0.00361448	19	6.01667	4322.11	4355.48	1.00772	2164	3738	2081	1748	9824	8118	8467	8302	1860	2196	1742	1617	2477	2048	2112	2215	3794.31	793	0.000165168	0.00183206	18	6	2149.25	0.162866	0.971476	20	6	6409.25	0.000309983	0.00334392	19
794	panose	0.00344533	0.013572	18	9	1271.02	0.0199098	0.211033	20	6	3856.75	0.000726242	0.00358025	19	7.6	1425.64	1785.32	1.25229	130	120	125	88	4117	2622	4378	4310	235	229	158	114	125	97	176	171	1074.69	794	8.88e-07	4.68e-05	18	9	1854.39	0.112823	0.828354	20	6	11674.5	1.71e-06	9.64e-05	19
798	phosphoenolpyruvate	0.00980952	0.0282233	24	21	1911.49	0.150426	0.427609	24.4321	17.9999	5778.48	0.0110946	0.032475	24.2161	19.5149	3420.36	2213.82	0.647247	630	5491	5627	3699	1234	1278	834	1552	3310	3612	1051	2970	4507	3766	6711	8130	3400.12	798	0.022073	0.0809025	24	18	1038.39	0.188624	1	26.5595	17.9999	4664.49	0.0269853	0.109058	25.2797
804	psicose	2.22e-07	1.25e-05	18	9	17139.2	0.0236933	0.211033	20	6	39078	1.06e-07	1.08e-05	19	7.6	19677.3	18499.6	0.940149	2504	2344	3253	3757	45297	35518	29855	45642	14087	14846	14701	19301	6754	6379	4465	7948	16040.7	804	0.000654457	0.00551707	18	9	12323.1	0.07834	0.750462	20	6.00002	34659	0.000557737	0.00505562	19
805	putrescine	7.77e-06	0.000128434	24	0	5581.72	0.0117856	0.211033	23.9024	6.63e-05	22790.7	1.58e-06	3.8e-05	23.9512	3.32e-05	17486.4	7292.96	0.417064	23423	20622	22395	24723	13081	15698	15517	14640	10174	11814	11967	14210	20637	21791	19547	19731	17498.1	805	0.0473038	0.140412	24	21	5367.29	0.440448	1	23.1373	17.9999	24831.7	0.101489	0.31805	23.5686
807	raffinose	0.000320124	0.00195554	18	9	3860.1	0.0215699	0.211033	20	5.99999	10170.5	8.9e-05	0.000619775	19	7.6	4364.12	4546.5	1.04179	829	1194	606	802	11159	12084	10371	7068	2147	2142	1859	1065	1070	895	1106	1129	3470.38	807	0.000165168	0.00183206	18	9	1879.49	0.0916278	0.796312	20	6	10776.8	0.0001831	0.00230378	19
808	ribitol	1.91e-05	0.000211771	18	9	7767.92	0.0425131	0.223696	20	6	19750.2	1.22e-05	0.0001285	19	7.6	12211.9	7916.9	0.648297	3165	3376	5393	4900	20996	17861	20466	19678	7683	14115	14186	10438	5312	5774	5037	12109	10655.6	808	0.000165168	0.00183206	18	9	4632.26	0.0500409	0.670731	20	6	13732.8	0.000104996	0.00142761	19
809	ribonic acid	0.00164724	0.00708482	18	9	1090.71	0.115256	0.359856	20	5.99998	6798.75	0.00181677	0.00750754	19	7.59999	3723.4	2519.83	0.676754	1428	1380	1872	2039	7700	8980	8433	2082	2187	2411	2624	2854	1894	1682	1790	2293	3228.06	809	0.00590343	0.0294473	18	9	669.807	0.433025	1	20	5.99999	7037	0.0178155	0.077415	19
811	saccharopine	8.88e-07	2.58e-05	18	9	2408.05	0.151159	0.427609	20	5.99999	8097.75	2.26e-06	4.78e-05	19	7.6	3234.56	3839.76	1.1871	329	231	309	248	16316	6037	6354	3684	743	2337	668	814	577	341	310	378	2479.75	811	1.15e-05	0.000278046	18	9	934.795	0.341555	1	20	6	7703	5.3e-05	0.000875362	19
816	sinigrin	8.88e-07	2.58e-05	18	9	2974.09	0.0201161	0.211033	20	6	7977.5	3.37e-07	1.23e-05	19	7.6	3982.7	3821.37	0.959494	662	663	736	825	9675	8240	8004	5991	4117	3715	2781	2312	822	923	861	1377	3231.5	816	0.000165168	0.00183206	18	9	3666	0.170066	0.986093	20	6	9456.5	0.00032247	0.00339803	19
817	sophorose	8.88e-07	2.58e-05	18	9	1150.82	0.0549994	0.245657	20	6	2687.75	8.71e-07	2.3e-05	19	7.6	1395.05	1241.48	0.889921	248	242	328	262	3516	1261	3052	2922	709	1252	1046	1573	358	471	640	536	1151	817	0.00359818	0.020495	18	9	485.075	0.311177	1	20	6	1583.75	0.00872753	0.0456976	19
821	succinic acid	7.77e-06	0.000128434	18	9	24784.6	0.022624	0.211033	20	6	84118.8	2.91e-06	5.59e-05	19	7.6	50009	32236.4	0.644612	13661	23305	22410	20926	89192	87544	79072	80667	34477	49502	40174	45670	30682	31144	20113	30214	43672.1	821	8.88e-07	4.68e-05	18	9	33595.4	0.559034	1	20	6.00001	177677	7.7e-06	0.000259725	19
823	tagatose	2.22e-07	1.25e-05	18	9	43653.9	0.0501724	0.23669	20	6	88159.8	2.15e-07	1.08e-05	19	7.6	40556.2	42303.4	1.04308	3904	2672	5152	3992	72306	67178	140795	72360	22365	27439	25047	31191	11309	10536	6911	12688	32240.3	823	1.15e-05	0.000278046	18	9	15877.7	0.0454667	0.670731	20	6	58370	8.11e-06	0.000263098	19
826	threitol	0.000987235	0.00470192	18	9	1179.81	0.0169043	0.211033	20	6.00001	5313.75	0.000200275	0.00124411	19	7.60001	2802.3	2144.76	0.765358	881	1306	1157	1132	5719	5103	5193	5240	1278	2142	1851	2592	436	1009	1474	1578	2380.69	826	3.11e-05	0.000582233	18	9	686.601	0.0572233	0.670731	20	5.99998	4276.75	2.53e-05	0.000561825	19
827	threonic acid	1.91e-05	0.000211771	18	9	1957.63	0.0211534	0.211033	20	6.00002	5583.5	6.35e-06	8.62e-05	19	7.60001	2776.21	2314.06	0.833534	743	953	941	906	6780	4606	5613	5335	1586	2022	1497	1676	1391	1120	728	1244	2321.31	827	0.00590343	0.0294473	18	9	2417.6	0.0623256	0.670865	20	5.99999	8768.75	0.00327742	0.0212528	19
828	threonine	0.0419656	0.0867083	18	15	157625	0.125466	0.383596	20	12	963412	0.0328902	0.0764233	19	13.6167	885278	161531	0.182464	1026209	987576	904436	871291	757789	693681	716574	685610	929880	1014922	943580	965266	985726	997925	874580	784366	883713	828	0.00359818	0.020495	18	0	133788	0.114979	0.834728	20	17.9999	743311	0.00363669	0.0229871	19
837	uric acid	8.77e-05	0.000697384	18	0	63404.1	0.0106025	0.211033	24.2975	17.9999	93302.1	1.38e-05	0.000144062	21.1488	18.408	57356.4	58341.4	1.01717	128970	132008	110318	112566	14646	23322	17860	24977	27370	23679	22960	21787	112090	87277	93735	80108	64604.6	837	3.55e-06	0.000119774	18	0	13303.9	0.0222773	0.670731	23.6676	17.9999	72156.7	1.37e-06	8.9e-05	20.8338
839	valine	0.0210199	0.0507729	18	0	503146	0.349787	0.739263	20	12	3.84883e+06	0.0434731	0.0982515	19	15.2	3.69179e+06	696478	0.188656	4382201	4430610	3848958	4330597	2950985	3296905	3284429	2885753	3805459	3484709	3969408	4135763	4017714	3212035	4453172	3709482	3.76239e+06	839	0.022073	0.0809025	18	0	750905	0.239048	1	20	18	3.80461e+06	0.0329492	0.126255	19
841	xylitol	0.000572095	0.00305238	24	21	25695.7	0.0812877	0.298914	24.1644	17.9999	195151	0.000510429	0.00262373	24.0822	19.5053	163914	28834.9	0.175915	158863	176511	165719	176394	115862	143086	122791	152796	153670	135134	143377	196195	179498	185100	212198	203809	163813	841	0.000654457	0.00551707	24	21	52700.7	0.0327635	0.670731	20	17.9999	183856	0.00025195	0.0029095	22
[truncated: 20 more columns]

## Sheet: 0.5 cycling in TM
ID	CycID	JTK_pvalue	JTK_BH.Q	JTK_period	JTK_adjphase	JTK_amplitude	LS_pvalue	LS_BH.Q	LS_period	LS_adjphase	LS_amplitude	meta2d_pvalue	meta2d_BH.Q	meta2d_period	meta2d_phase	meta2d_Base	meta2d_AMP	meta2d_rAMP	0	0	0	0	6	6	6	6	12	12	12	12	18	18	18	18	TM
9	1684	0.0299489	0.066265	24	9	745.291	0.0922085	0.318573	24.0327	6	1749	0.0190325	0.049673	24.0163	7.50102	1227.73	744.146	0.606116	688	583	980	591	1766	1692	1282	2256	890	1586	2063	2284	570	790	348	1283	1228.25
10	1702	0.00421867	0.0149426	24	12	28678.7	0.42418	0.82966	24.4321	12	123611	0.0131094	0.0374617	24.2161	12.001	90980.8	41973.8	0.461348	60171	51784	57873	52489	166765	81499	87416	88679	92399	185413	107215	109417	137721	75335	53553	52734	91278.9
11	1704	0.0065055	0.0205398	18	6	1428.71	0.0824486	0.298914	20	6	4043	0.0045756	0.0163047	19	6.01667	2797.58	1023.38	0.365809	2047	2960	2483	4084	3299	4116	4254	4503	749	1391	1156	1532	2854	2831	3524	994	2673.56
12	1708	0.0299489	0.066265	18	9	13911.3	0.544415	0.958125	25.2722	6	47687.2	0.0834195	0.168089	21.6361	7.97739	39788.7	12559.4	0.315652	20708	29887	18561	24586	71557	36260	40765	42167	41316	72399	35749	39998	54702	39247	25733	21854	38468.1
13	1713	0.0299489	0.066265	18	9	20023.1	0.404359	0.807759	24.4321	6	89893.5	0.0655607	0.139213	21.2161	7.90912	75796.5	19641.4	0.259133	63801	55164	46121	49874	130628	74176	79760	75010	78453	111213	81796	68944	85681	68772	54621	50270	73392.8
17	1735	0.0144977	0.0373749	24	12	29987.7	0.802964	1	25.2722	12	168438	0.0634816	0.135481	24.6361	12.008	138920	43798.5	0.315278	98646	97560	88215	94225	273057	117895	125286	142802	137115	250711	143787	142138	210213	120014	92317	103501	139843
23	1771	0.0419656	0.0867083	24	0	717.36	0.557141	0.972402	22.5575	4.69e-05	4946.75	0.111195	0.215489	23.2788	2.42e-05	4100.66	1222	0.298	3773	3981	4417	7616	3416	3321	4679	3963	3463	1850	3275	3622	4300	3768	5007	5656	4131.69
27	1830	0.0210199	0.0507729	18	9	12197.6	0.604407	1	23.9024	6	65905.5	0.06817	0.143668	20.9512	7.8674	53765.6	15073.1	0.280348	39352	37638	33722	41162	103940	47909	53885	57888	51496	82222	54304	47791	60587	47071	39457	29784	51763
28	1840	0.00164724	0.00708482	24	12	20203.8	0.0501529	0.23669	23.7736	12	82338.5	0.000859295	0.00406958	23.8868	12.0003	60128.5	26532.7	0.441267	44534	40478	33307	35488	80060	61149	61139	62928	73893	95193	88467	71801	64024	69957	44590	33479	60030.4
30	1967	0.0210199	0.0507729	24	15	8264.84	0.137188	0.407215	20.7529	12	47855	0.0197493	0.0509134	22.3765	13.462	37637.6	12187.7	0.323819	36174	34174	25734	26956	38652	28785	32205	30018	45802	55902	50861	38855	42638	47685	30998	32148	37349.2
32	1981	1.91e-05	0.000211771	18	9	2732.61	0.0309355	0.211033	20	5.99998	8193.25	9.06e-06	0.000115738	19	7.59999	4147.65	3290.82	0.793417	1202	1601	1244	1866	8590	7901	5598	10684	2717	2613	2506	2268	1563	1480	2181	1998	3500.75
38	2031	2.22e-07	1.25e-05	18	9	26380.7	0.0320236	0.211033	20	5.99999	52252.2	1.4e-07	1.08e-05	19	7.59999	21146.4	24599.6	1.1633	1218	1340	2059	2199	40357	39917	52499	76236	5839	8240	7003	9728	4745	2881	2651	4059	16310.7
43	2153	0.0065055	0.0205398	24	12	11753.5	0.10924	0.351928	23.9024	12	61481	0.00586248	0.0198477	23.9512	12.0001	51153.3	14380.8	0.281131	42336	38588	38539	45163	68705	50857	56643	52274	51717	60553	74131	59523	43096	56509	42438	37014	51130.4
45	2193	0.00131724	0.00623838	18	9	645.588	0.0254615	0.211033	20	5.99999	2719.75	0.000379083	0.00204851	19	7.59999	1624.42	868.841	0.534863	734	941	936	1034	2473	2360	3086	2960	1107	1177	1169	1144	1107	882	855	1293	1453.62
46	2197	0.000572095	0.00305238	24	15	4943.38	0.0772256	0.298914	21.8859	12	28061.2	0.000487187	0.00256687	22.9429	13.4595	22728.4	6148.07	0.270502	18309	20465	17960	17072	24011	20061	18471	18565	27969	32685	27475	24116	25281	28264	20626	20665	22624.7
53	2568	0.00980952	0.0282233	24	12	2132.28	0.34989	0.739263	25.7143	12	6262.25	0.0229087	0.0568002	24.8571	12.0143	4485.17	2319.38	0.517121	2785	1990	2232	825	9328	4442	5020	3419	4991	8066	6155	5837	8013	4607	2658	2450	4551.12
60	2806	0.0210199	0.0507729	24	21	4271.63	0.217725	0.568242	23.1496	17.9999	38621.5	0.0292296	0.0700015	23.5748	19.4792	34370.3	4757.27	0.138412	42555	38242	35835	29610	30494	29336	32649	25678	33353	36810	31106	31184	36075	43841	37985	36585	34458.6
61	2813	0.0065055	0.0205398	24	9	2946.51	0.0283234	0.211033	20	6	20386.8	0.00176872	0.00734499	22	7.425	8335.48	8435.02	1.01194	4425	3729	2626	2183	27240	12608	20018	21681	6624	4523	3659	2322	2811	2741	2957	1894	7627.56
62	3026	0.0144977	0.0373749	24	12	3716.2	0.447018	0.858396	23.7736	12	15861.5	0.0391367	0.0891682	23.8868	12.0003	10524.8	6898.82	0.655482	7389	6482	972	7219	24461	9398	10094	7038	12048	26328	12916	12154	11724	5286	7315	7165	10499.3
66	3122	0.0065055	0.0205398	24	12	27605.4	0.26489	0.634756	20	6.00001	117458	0.0126892	0.0363842	22	8.8	80045	34286.5	0.42834	40348	59344	50776	50429	79215	83985	203930	102703	84965	84987	93098	84495	44344	44652	62446	59960	76854.8
67	3232	7.77e-06	0.000128434	18	9	12232.9	0.0445799	0.223696	20	6	26086.2	5.5e-06	8.08e-05	19	7.6	12893.8	12646.1	0.980791	2325	1461	261	1615	36423	19674	24344	23904	8475	12150	17512	3071	3171	5933	3265	2942	10407.9
69	3248	0.000572095	0.00305238	18	9	3522.1	0.0777646	0.298914	20	6	14833.5	0.000490278	0.00256711	19	7.6	6803.71	6215.52	0.913549	7326	438	1231	1155	19258	6070	21633	12373	3605	3977	3411	2072	1681	1774	1919	1387	5581.88
70	3294	2.89e-06	6.76e-05	18	9	3377.14	0.0150656	0.211033	20	5.99999	16331.8	7.8e-07	2.27e-05	19	7.6	6616.95	7716.8	1.16622	717	704	552	658	16933	16835	17020	14539	3170	3026	2488	1323	682	1223	824	906	5100
71	4219	8.77e-05	0.000697384	18	9	6706.91	0.0433634	0.223696	20	5.99999	15476	5.13e-05	0.000417607	19	7.6	9450.58	7244.35	0.766551	2341	1784	1808	1451	11948	17561	18636	13759	9845	8511	12690	10084	5721	8743	1646	1896	8026.5
77	4541	0.0065055	0.0205398	18	9	2809.87	0.367107	0.762377	20	6	8293.75	0.0168063	0.0457024	19	7.6	5498.34	2787.82	0.507029	3375	2355	2243	1985	3946	8253	12769	8207	5954	2645	6798	4639	2195	4940	5525	3376	4950.31
82	4723	0.00980952	0.0282233	18	6	1306.73	0.250853	0.616362	20	5.99999	3799	0.0172432	0.0464408	19	6.01666	2390.95	1557.73	0.65151	1253	762	1417	1564	4926	3303	3700	3267	637	1945	1768	1856	2405	2416	1697	2319	2202.19
84	4793	7.77e-06	0.000128434	18	9	5469.47	0.0183348	0.211033	20	6.00001	15718.2	2.39e-06	4.79e-05	19	7.60001	6993.17	7449.88	1.06531	797	683	924	642	15772	16443	17678	12980	4003	4166	4040	3792	2674	2306	728	831	5528.69
86	4818	0.000572095	0.00305238	24	12	14820.1	0.0670534	0.274912	24.7059	12	77444	0.000428433	0.00228588	24.3529	12.0025	64014.1	17790.4	0.277914	52864	40903	50068	49397	85659	63598	72604	63637	71394	79875	89346	69161	61889	70518	51125	55499	64221.1
87	4819	0.000320124	0.00195554	18	9	7327.75	0.0170562	0.211033	20	5.99999	23884	7.16e-05	0.000536931	19	7.6	9960.86	11043.6	1.1087	3162	1546	829	844	18512	25559	27326	24139	5039	4038	4552	2666	2442	1382	1414	1189	7789.94
91	4929	0.00980952	0.0282233	18	9	2375.53	0.866206	1	20	5.99999	20712.5	0.0490114	0.109015	19	7.6	16770.2	4288.93	0.255747	13105	9631	11775	14657	35211	16297	16248	15094	14878	22438	14814	14452	19045	13836	10121	13232	15927.1
95	7490	0.0065055	0.0205398	18	0	43976.9	0.200468	0.533106	25.1282	17.9999	60562.6	0.00996654	0.0298996	21.5641	18.5055	45428.7	40996.2	0.902428	76449	129480	85736	92008	10110	20579	18688	13490	20759	14335	33396	38791	13623	23158	121302	84168	49754.5
96	7826	0.0210199	0.0507729	24	15	728.85	0.234094	0.589079	23.52	12	4287	0.0310704	0.0727565	23.76	13.4862	3237.49	1299.57	0.401414	2500	2420	1574	2463	3745	2956	2593	3271	4722	5058	5198	2170	3112	3912	3276	2743	3232.06
97	8270	0.000320124	0.00195554	18	9	1371.08	0.0583881	0.253717	20	6	4424.25	0.000222194	0.00130076	19	7.6	2159.97	2042.96	0.945824	574	374	755	354	3597	6364	5696	2040	1791	1402	1618	1454	866	488	348	413	1758.38
98	8598	0.000320124	0.00195554	18	9	7897.32	0.0205211	0.211033	20	6	23639.2	8.5e-05	0.000601869	19	7.6	9544.92	10725.9	1.12373	1146	1456	1354	1362	28502	24761	23453	17841	3389	572	4814	2658	1945	2207	1676	1847	7436.44
100	11481	0.0210199	0.0507729	24	21	631.446	0.278625	0.650639	20	17.9999	3695	0.0359609	0.0828279	22	19.525	3175.3	597.784	0.18826	3680	3190	3822	3792	2216	2246	2290	2907	3657	3000	2632	3476	4543	3410	2477	4350	3230.5
102	14702	4.22e-05	0.000390745	18	9	2549.83	0.0153281	0.211033	20	5.99998	14307	9.86e-06	0.000117379	19	7.59999	6796.63	6125.44	0.901248	2196	2198	1819	1556	15089	13718	14852	13569	4006	4190	4029	3121	1996	2533	2963	1645	5592.5
103	14709	8.88e-07	2.58e-05	18	9	3492.05	0.0164508	0.211033	20	6	13912.2	2.78e-07	1.08e-05	19	7.6	5385.68	6603.59	1.22614	361	453	374	308	16582	12455	13996	12616	1666	2002	1632	818	525	398	698	517	4087.56
104	14730	8.88e-07	2.58e-05	18	9	6361.13	0.0153928	0.211033	20	5.99999	31601	2.61e-07	1.08e-05	19	7.6	12253.9	15039.8	1.22735	939	982	724	668	34958	33680	29140	28626	4598	4014	3929	1814	1209	1369	1154	954	9297.38
105	14746	7.77e-06	0.000128434	18	9	1195.72	0.0176667	0.211033	20	6	4881	2.31e-06	4.78e-05	19	7.6	1971.14	2244.07	1.13847	214	208	295	214	5832	4649	4682	4361	813	768	589	360	364	440	298	393	1530
106	14806	0.0065055	0.0205398	18	6	2259.03	0.0550762	0.245657	20	6	5214	0.00320109	0.0121555	19	6.01667	2912.43	2352.33	0.807686	1528	1671	1798	1821	6038	5331	5049	4438	1265	1802	1343	1236	3804	1573	1636	1705	2627.38
108	16645	0.00421867	0.0149426	18	9	124.804	0.426872	0.831254	24.5682	6	580.25	0.0131812	0.0375397	21.2841	7.92001	493.033	94.8332	0.192346	420	347	323	413	501	596	627	597	364	588	573	526	319	500	522	491	481.688
110	16707	0.00421867	0.0149426	18	9	3388.1	0.0159789	0.211033	20	5.99999	13208.2	0.000714861	0.00354487	19	7.6	5434.88	6107.64	1.12379	908	693	753	765	14347	13562	13833	11091	2813	2428	2290	674	854	1097	891	749	4234.25
111	16747	4.22e-05	0.000390745	18	9	4960	0.0440525	0.223696	20	5.99999	11776.2	2.64e-05	0.000244359	19	7.6	8182.33	4314.84	0.527336	3171	3186	4318	4480	12417	10612	11801	12275	5061	7903	10562	11271	5433	4850	3902	6104	7334.12
112	16788	4.22e-05	0.000390745	18	9	3034.9	0.0162127	0.211033	20	6.00002	9875.75	1.04e-05	0.000118379	19	7.60001	4219.27	4719.92	1.11866	411	645	377	424	9203	10790	11141	8369	2366	2094	2141	2007	931	949	374	441	3291.44
113	16792	8.88e-07	2.58e-05	18	9	2994.6	0.0157986	0.211033	20	5.99999	19662.8	2.68e-07	1.08e-05	19	7.59999	8486.63	8928.74	1.0521	1032	1706	1510	1422	20605	19786	19366	18894	4181	3693	5117	2184	1754	1953	2680	1820	6731.44
116	17070	8.88e-07	2.58e-05	18	9	2085.61	0.0167577	0.211033	20	6	8573	2.83e-07	1.08e-05	19	7.6	3376.21	4006.82	1.18678	421	366	318	296	10183	7543	8905	7661	1270	1336	885	514	461	452	424	382	2588.56
118	17222	1.91e-05	0.000211771	18	9	3934.52	0.0319756	0.211033	20	6.00002	8790.25	9.35e-06	0.000117379	19	7.60001	4004.5	3849	0.961168	1212	1037	633	606	12288	6840	7366	8667	2099	2423	2171	1371	1364	1431	1682	776	3247.88
119	17297	0.00164724	0.00708482	18	9	755.897	0.100988	0.3419	20	6.00002	2813.25	0.00161385	0.00687109	19	7.60001	1550.78	1032.81	0.665992	688	466	875	590	1570	2630	4153	2900	475	1254	973	1462	794	786	727	1221	1347.75
120	17298	4.22e-05	0.000390745	18	9	2086.67	0.0179965	0.211033	20	6	7195.5	1.15e-05	0.000122241	19	7.6	2926.33	3278.35	1.1203	451	679	396	179	8793	7221	6552	6216	1081	1002	983	731	572	548	666	440	2281.88
121	17382	0.00267199	0.0105751	24	6	1050.76	0.0817236	0.298914	20	6.00001	4345.75	0.00205904	0.00834504	22	6.05	2577.24	1492	0.578913	2437	2439	1473	3220	5377	3559	5793	2654	1558	1578	2262	1362	1049	1396	2494	1104	2484.69
122	17456	8.88e-07	2.58e-05	18	9	16444.1	0.015744	0.211033	20	5.99999	91334.2	2.67e-07	1.08e-05	19	7.59999	36329.1	43890.4	1.20813	1432	3005	1561	1619	90032	87744	85566	101995	18583	16020	9331	8946	2358	3909	5767	5352	27701.2
124	17537	0.0419656	0.0867083	18	9	388.202	0.310642	0.702017	20	6	2132	0.069614	0.146346	19	7.6	1701.35	399.208	0.234642	1571	1134	1115	1364	2537	1760	2383	1848	1683	1979	1454	1230	1850	1260	1287	1511	1622.88
126	17682	0.000320124	0.00195554	18	9	892.369	0.0180203	0.211033	20	6	2951.5	7.54e-05	0.000552225	19	7.6	1161.56	1372.53	1.18163	98	110	174	127	3605	3033	2758	2410	444	452	261	172	139	62	210	213	891.75
127	17703	4.22e-05	0.000390745	18	9	4053.49	0.0172029	0.211033	20	6	15235.8	1.1e-05	0.000120244	19	7.6	7115.71	6567.48	0.922955	2196	2198	1819	1556	17902	13585	15327	14129	4006	4190	4029	3121	1996	2533	2963	1645	5824.69
128	18256	8.88e-07	2.58e-05	18	9	6364.67	0.0156921	0.211033	20	6	31170	2.66e-07	1.08e-05	19	7.6	11833.6	14665.7	1.23932	939	982	724	668	32551	33680	31972	26477	3053	1488	4177	1814	1209	1369	1154	954	8950.69
130	18266	0.00421867	0.0149426	24	9	425.325	0.111416	0.35368	24.8451	6.00002	2197.25	0.0040717	0.0149237	24.4225	7.52821	1766.57	451.886	0.255798	1827	1223	1655	2072	1909	2415	2374	2091	1859	1788	1654	2468	1558	1356	1177	970	1774.75
131	18318	0.0419656	0.0867083	24	12	3039.14	0.387507	0.790965	24.7059	12	30896	0.0832438	0.168089	24.3529	12.0025	28234.3	3857.15	0.136612	25347	24862	23096	25893	36649	28152	29092	27165	31459	32834	33357	25934	26546	29754	29142	23184	28279.1
133	18489	0.00164724	0.00708482	18	9	1505.78	0.0625458	0.263631	20	6	5453	0.00104888	0.00485827	19	7.6	2054.54	2567.25	1.24955	112	152	116	189	2298	7739	7856	3919	593	102	543	460	159	122	201	237	1549.88
134	18520	0.000987235	0.00470192	24	12	12636	0.0352797	0.218682	24.8451	12	51611	0.000392354	0.00210672	24.4225	12.0036	41536.2	13950.7	0.335869	30810	28597	27283	28728	53110	44229	48843	46655	48145	55286	56468	46545	41381	48358	30222	33032	41730.8
135	18588	4.22e-05	0.000390745	18	9	13128.9	0.0412827	0.221664	23.1496	6.00001	36534	2.48e-05	0.000235212	20.5748	7.81003	25039.9	13321	0.531992	16275	13218	10140	7725	45208	36578	35714	28636	31622	32247	28778	20217	17049	18678	16884	10310	23079.9
136	18619	0.000987235	0.00470192	18	9	14084.9	0.109898	0.351928	20	6	34004.2	0.00109893	0.00503476	19	7.6	13278.3	15802.7	1.19011	1210	1324	1498	1622	65886	24641	21572	23918	3109	5782	2352	2937	2970	1157	1074	1698	10171.9
137	20281	0.0419656	0.0867083	24	6	612.001	0.181999	0.496521	24.7059	5.99998	3671.5	0.0448688	0.100865	24.3529	6.00125	3185.21	228.998	0.0718943	2653	3805	4179	3740	4544	3239	3405	3498	2732	3024	2815	2707	3078	2672	2366	2549	3187.88
140	21704	0.0065055	0.0205398	18	9	11925.2	0.142903	0.421214	20	6.00001	29090	0.0074193	0.0237812	19	7.60001	16055.8	10595	0.659885	5130	4133	6221	5161	34909	23162	28685	29604	13498	6526	19819	1411	5479	16831	15265	7735	13973.1
141	21811	0.00980952	0.0282233	24	12	10450.7	0.0601777	0.259973	24.5682	12	43703	0.00497922	0.0174965	24.2841	12.0016	35070.1	12396.1	0.353467	27269	23706	22361	23738	48830	38311	39176	39185	37315	50485	49709	37303	34564	39257	25929	25838	35186
142	22969	0.0144977	0.0373749	18	9	3342.85	0.0298898	0.211033	20	5.99999	11240.8	0.00378907	0.0140096	19	7.6	5572.35	4388.4	0.787532	1342	1227	3045	2076	11874	12039	11842	9208	1202	4059	3506	2977	1439	2141	4540	2838	4709.69
146	31544	0.000987235	0.00470192	24	0	2328.86	0.345474	0.739174	21.995	7.15e-05	15095.2	0.00306393	0.0116873	22.9975	3.74e-05	12131.1	3863.68	0.318492	17203	16239	13427	13512	10474	10360	12945	13106	10453	738	10134	12711	11010	16099	14553	13374	12271.1
148	31695	0.00421867	0.0149426	24	0	178.014	0.146451	0.424255	23.6461	6.63e-05	711.749	0.00518315	0.0180554	23.8231	3.34e-05	601.208	240.112	0.399383	644	676	819	708	424	460	552	611	431	449	427	411	843	579	575	1033	602.625
149	32158	8.77e-05	0.000697384	18	9	832.972	0.0226081	0.211033	20	6	2701.25	2.8e-05	0.00025536	19	7.6	1291.92	1131.77	0.876037	332	256	391	510	2826	2302	3266	2411	416	809	768	823	522	405	386	688	1069.44
151	33415	0.0419656	0.0867083	24	0	12609.1	0.469126	0.884408	23.7736	6.63e-05	52679.4	0.0970142	0.191082	23.8868	3.33e-05	43461.7	17404.2	0.400449	47717	52646	47037	63318	37194	12288	50329	43722	42380	33850	40893	8905	39822	44070	69889	62372	43527
155	34059	0.0299489	0.066265	24	15	5207.66	0.102218	0.342159	22.6735	12	49788.5	0.020783	0.0526316	23.3368	13.4682	42232.3	9008.69	0.213313	40438	40186	30712	30725	43244	37730	40064	40412	46397	56015	52159	44583	47315	45973	39349	38816	42132.4
157	34097	0.0299489	0.066265	24	0	2458.26	0.281456	0.655434	24.9858	6.63e-05	15453.5	0.048688	0.108665	24.4929	3.25e-05	12874.2	2815.69	0.218708	17046	17310	13522	13936	10474	9757	12863	12629	10417	10505	10386	12472	9271	16294	15297	13120	12831.2
160	42007	0.000987235	0.00470192	24	12	7351.08	0.0511478	0.2387	24.9858	12	34153.5	0.000550074	0.00281038	24.4929	12.0049	28648.3	8335.9	0.290974	22182	19243	23565	17227	32673	37547	30071	34303	38591	34671	32039	31313	30401	27464	20259	28995	28784
164	46122	0.000320124	0.00195554	18	9	3819.08	0.0428883	0.223696	24.0327	6.00002	21134.8	0.000167445	0.00109424	21.0163	7.87756	18109.7	3951.44	0.218195	14555	12005	14748	14758	22971	20249	21564	19755	18829	20059	21030	18902	15857	18821	12775	14638	17594.8
166	46141	0.0144977	0.0373749	24	0	23434.2	0.277548	0.649925	24.0327	6.63e-05	62735	0.0262173	0.0642476	24.0163	3.31e-05	42679.9	31253.3	0.73227	41964	54241	57577	97159	16478	32541	23768	28997	20093	13228	16473	41745	30328	32231	75053	100736	42663.2
168	46292	0.0299489	0.066265	24	21	551.897	0.314619	0.704552	22.9091	17.9999	3620.75	0.0533752	0.117175	23.4545	19.4756	3057.91	606.773	0.198427	3295	2732	3481	3792	2216	2246	2290	2907	3357	3460	1725	3175	4352	3495	3115	3521	3072.44
174	62250	0.0144977	0.0373749	24	9	18333.2	0.100231	0.340705	20	6	86094	0.0109479	0.0321571	22	7.425	62979.3	20365.5	0.323368	49581	31353	61405	55938	92834	93624	90474	67444	51258	51099	62246	81753	52842	50450	35633	52388	61270.1
176	62311	0.0299489	0.066265	24	21	2290.5	0.360367	0.755694	23.3952	17.9999	14881.5	0.0596711	0.127997	23.6976	19.484	12696.5	2295.2	0.180774	11538	14753	13872	14122	13820	9143	7850	10506	10572	14409	10635	12880	17803	11685	13841	16197	12726.6
180	62834	0.0144977	0.0373749	24	0	1703.07	0.694591	1	24.0327	17.9999	5069.48	0.0563738	0.122167	24.0163	21.002	3544.58	2259.75	0.637521	2756	3832	4613	9640	1613	2331	1954	1758	1385	1308	1421	3797	1980	1977	5174	11147	3542.88
183	64551	0.00980952	0.0282233	24	12	4502.86	0.113232	0.357508	24.2975	12	23104.5	0.00866688	0.026861	24.1488	12.0005	18449.3	5368.9	0.291008	15460	13841	14125	11142	22955	18673	18407	18366	22339	25176	24665	20238	20494	22916	15029	11783	18475.6
186	64569	0.0144977	0.0373749	24	15	1840.25	0.0542693	0.245657	20	12	9437	0.00641035	0.0214707	22	13.475	6950.98	3108.55	0.44721	6620	5852	4585	5854	5918	5129	3941	6417	8334	10148	10471	8795	7599	8626	6438	5151	6867.38
187	64604	0.000987235	0.00470192	24	12	1608.67	0.0467855	0.227978	24.4321	12	7120	0.000507276	0.00262352	24.2161	12.0009	5660.08	1933.17	0.341544	4471	4113	3649	3889	7353	6157	6395	5814	6434	8075	7776	6195	5622	6403	4392	4043	5673.81
188	64612	0.0065055	0.0205398	24	12	1645.26	0.102408	0.342159	21.8859	12	11611.8	0.00553884	0.0190581	22.9429	12.0255	9282.6	2411.98	0.259839	7957	7096	7303	7013	7468	9668	10089	9232	9768	13563	12894	10222	10177	9694	8019	7074	9202.31
191	64632	0.000572095	0.00305238	18	9	267.817	0.0804021	0.298914	20	5.99999	845	0.000505372	0.00262352	19	7.59999	601.881	263.283	0.437434	376	327	338	342	1044	795	835	706	470	457	678	781	366	619	300	368	550.125
192	64643	0.00421867	0.0149426	24	15	1249.46	0.193589	0.523062	23.3952	12	6652.25	0.00662354	0.0218202	23.6976	13.4831	5243.81	1790.91	0.341528	3922	4175	3740	3874	7535	4189	3800	5323	6038	7715	7087	5769	5999	5570	4649	4366	5234.44
193	64666	0.000320124	0.00195554	24	9	2355.02	0.0412283	0.221664	21.0501	6.00001	6882.25	0.000161486	0.00108041	22.5251	7.43366	4235.02	2641.28	0.623674	3500	2888	996	2733	8468	6196	7252	5613	4509	4849	4793	4462	1281	3899	757	2931	4070.44
194	64668	0.0419656	0.0867083	24	12	3251.28	0.395597	0.799733	24.5682	12	30835.2	0.0846387	0.169882	24.2841	12.0016	28023.7	4200.16	0.149879	24839	24595	22819	25169	37918	27931	28889	26690	31584	32541	33393	25823	26292	29609	28420	22495	28062.9
195	64736	0.000572095	0.00305238	24	12	2033.99	0.0410961	0.221664	24.7059	12	7887.25	0.000274091	0.00154674	24.3529	12.0025	6363.65	2157.85	0.339091	4948	4433	4304	4222	7742	7505	7096	7386	7622	7982	8844	7101	7105	6988	4541	4401	6388.75
196	64742	0.0144977	0.0373749	18	9	1247.51	0.397298	0.801174	24.1644	12	7639	0.0354628	0.0819045	21.0822	10.5052	6889.49	1177.93	0.170975	6176	5313	6242	5008	10048	6847	6902	6607	6427	9118	8484	6527	6188	7114	5620	5317	6746.12
204	66305	0.000572095	0.00305238	24	12	19524.6	0.0450201	0.224568	23.9024	12	81268.5	0.000297913	0.00166318	23.9512	12	59706.8	25410.1	0.425582	46725	41055	33377	32024	80519	57651	61465	61867	72683	95222	84597	72572	61429	68965	44515	39994	59666.2
207	66827	7.77e-06	0.000128434	18	9	1152.94	0.0410279	0.221664	20	6	2400.5	5.09e-06	7.94e-05	19	7.6	1130.67	1191.57	1.05386	167	134	97	112	3265	1810	2345	2182	296	1715	222	1204	174	172	303	145	896.438
208	68356	0.0254844	0.0612061	24	15	570.282	0.594136	1	24.1644	12	3606	0.0785879	0.161191	24.0822	13.5053	2881.47	958.255	0.332558	2502	1748	2058	2272	4952	2753	2469	1748	2988	4487	3476	3473	2857	3393	2835	2115	2882.88
212	84221	0.0144977	0.0373749	18	9	9366.34	0.3796	0.778596	20	6.00001	28338	0.0341339	0.0790519	19	7.60001	17701.8	10964.7	0.619413	12510	4576	374	9965	46640	23244	11074	32394	17516	17717	25723	5403	15381	7560	5113	13552	15546.4
213	84566	0.0299489	0.066265	18	3	235.467	0.508377	0.920308	20	6.63e-05	1354.75	0.0789402	0.161521	19	1.58336	1217.27	315.692	0.259344	1433	1423	1421	1142	994	1518	1079	1407	648	885	1089	1138	1817	1051	1667	1621	1270.81
214	84925	2.89e-06	6.76e-05	18	9	12289.9	0.0149937	0.211033	20	5.99999	81438	7.77e-07	2.27e-05	19	7.59999	34187	37706.8	1.10296	5044	5634	4313	4216	85760	82556	79666	77770	16621	18525	14138	8248	7362	7923	5832	4787	26774.7
216	88847	4.22e-05	0.000390745	18	9	64934.3	0.024711	0.211033	20	5.99998	160796	1.54e-05	0.000158311	19	7.59999	71961.9	72805.1	1.01172	14987	17389	13679	9365	187965	157419	189779	108019	45993	46037	40369	17227	18109	22527	17839	15698	57650.1
221	95422	0.00421867	0.0149426	18	0	9515.54	0.268148	0.640364	23.6461	17.9999	18269	0.00880598	0.0270929	20.8231	18.337	12106.7	9161.15	0.756704	18215	20428	25273	22054	8166	2734	783	6233	4539	8521	9635	14415	7974	8663	36642	19797	13379.5
222	95438	0.0144977	0.0373749	24	9	1774.13	0.319534	0.707003	21.253	6	7919.75	0.0295307	0.0703231	22.6265	7.43635	5270.14	2284.22	0.433426	5644	5158	973	5342	11205	6999	6049	7426	3395	7561	3929	5957	4846	1889	5154	672	5137.44
223	95440	0.000320124	0.00195554	18	9	5213.14	0.0737742	0.290615	20	5.99999	9585.5	0.000275221	0.00154674	19	7.59999	5593.51	4291.27	0.767189	855	1000	1701	1114	9259	9107	10095	9881	1088	6246	5898	8375	4050	4913	1075	1342	4749.94
225	97450	8.88e-07	2.58e-05	18	9	6510.51	0.0230361	0.211033	20	5.99999	15406	3.83e-07	1.34e-05	19	7.6	6339.93	7134.55	1.12534	890	845	712	696	10086	18006	17544	15988	2670	3390	2189	1293	1417	1281	916	1076	4937.44
226	98053	0.00980952	0.0282233	18	15	2037.7	0.03251	0.211033	20	12	8548	0.00288631	0.0110598	19	13.6167	5932.29	2844.04	0.479417	6090	5722	4218	4629	3286	4365	3396	4307	9415	9049	8498	7230	6159	7704	5810	4598	5904.75
228	100114	0.00164724	0.00708482	18	9	411.89	0.377415	0.776002	20	5.99998	1862.75	0.0052117	0.0180801	19	7.59999	903.757	765.954	0.847522	129	211	344	296	3999	1292	859	1301	418	784	477	278	384	215	485	579	753.188
230	100343	2.22e-07	1.25e-05	18	9	281.075	0.0230064	0.211033	20	6	939	1.03e-07	1.08e-05	19	7.6	539.161	361.363	0.670231	208	213	179	224	981	954	987	834	377	443	368	516	316	325	272	293	468.125
232	102246	0.0144977	0.0373749	18	9	19589.7	0.736326	1	24.7059	6	91111.8	0.0591382	0.127177	21.3529	7.93109	73944.7	19854.3	0.268502	53607	55344	27299	62273	146921	97779	47221	72526	84983	84244	71050	78275	72364	62464	61112	68534	71624.8
234	102337	0.00980952	0.0282233	24	9	563.211	0.261708	0.63215	20	6	5246.5	0.0178806	0.0477005	22	7.425	4341.91	760.005	0.175039	3952	3145	4310	4176	6714	4528	5177	4567	3503	4860	4071	4517	4053	3691	3454	3732	4278.12
235	102727	0.0065055	0.0205398	24	9	1300.37	0.0202269	0.211033	20	6	6314.75	0.00130742	0.00580081	22	7.425	2153.35	2586.75	1.20127	132	1823	1928	91	7803	6702	6945	3809	368	391	276	173	172	167	138	62	1936.25
237	103821	0.0299489	0.066265	24	9	1334.66	0.109343	0.351928	20	6	7022.25	0.022011	0.0548973	22	7.425	5103.48	1556.93	0.305073	4646	3194	5314	2998	6891	6225	7458	7515	6077	5032	4261	3728	4266	2755	5296	3909	4972.81
240	104135	0.000572095	0.00305238	24	12	5702.46	0.0394735	0.221664	20.9501	12	38786	0.000264179	0.00151498	22.4751	12.0555	31724	7903.71	0.24914	27980	26794	24494	25675	34893	30397	32524	29023	35849	40036	42668	36591	31389	32243	26425	24696	31354.8
241	104994	0.00164724	0.00708482	24	12	9261.33	0.070335	0.285059	24.5682	12	43470.5	0.0011659	0.00528417	24.2841	12.0016	34427.2	11797	0.342664	30242	25728	19337	20439	45791	38787	38314	33337	41069	45334	51899	35580	30743	40156	28777	27068	34537.6
242	105081	0.000779665	0.00413369	24	9	610.233	0.017319	0.211033	20	5.99999	3967.25	0.000164907	0.00108606	22	7.42499	1741.77	1625.21	0.933079	861	435	699	773	4445	3752	4411	3261	1119	1149	1353	735	528	720	773	672	1605.38
243	105085	2.22e-07	1.25e-05	18	9	3083.69	0.0168779	0.211033	20	5.99999	11279.2	7.64e-08	1.08e-05	19	7.59999	4609.32	5289.95	1.14766	502	553	485	363	12329	10748	12568	9472	1912	2273	1574	1283	793	844	763	649	3569.44
245	105370	7.77e-06	0.000128434	18	9	4478.11	0.0301042	0.211033	20	6	9697.75	3.81e-06	6.83e-05	19	7.6	4516.92	4634.85	1.02611	437	405	484	478	11907	7340	11071	8473	1118	4627	3952	2399	1156	1460	1457	929	3605.81
247	105630	0.0210199	0.0507729	18	6	6138.39	0.0429523	0.223696	20	6	23426.8	0.00723181	0.0234477	19	6.01667	9744.11	13796	1.41583	2015	4182	3538	4088	29680	10363	29112	24552	1911	3844	1793	1555	2676	1122	5016	3710	8072.31
248	105769	2.89e-06	6.76e-05	18	9	3679.08	0.0203722	0.211033	20	5.99999	8911.5	1.04e-06	2.65e-05	19	7.59999	3712.08	4179.41	1.12589	442	557	439	389	10149	9586	6123	9788	1324	2268	1648	1081	508	727	666	553	2890.5
249	105863	1.91e-05	0.000211771	18	9	671.751	0.0172838	0.211033	20	5.99999	2295	5.25e-06	8.05e-05	19	7.59999	980.593	1043.96	1.06462	160	206	184	141	2439	2205	2650	1886	480	498	475	240	187	258	234	163	775.375
251	106385	0.00421867	0.0149426	24	9	1438.79	0.0858792	0.307254	20	6	4710.25	0.00323279	0.0122208	22	7.425	2572.9	1853.91	0.720551	1163	1622	1130	1713	5442	4379	5815	3205	5039	1710	1838	1040	1129	1337	1043	1072	2417.31
252	106387	0.00980952	0.0282233	18	9	14916.1	0.0146576	0.211033	20	6	87680	0.00141587	0.00612092	19	7.6	33940	40219	1.185	1315	1018	1605	20214	97844	86474	86943	79459	15189	934	11936	4051	2296	2655	2634	1974	26033.8
253	106482	0.0210199	0.0507729	18	9	1446.39	0.457827	0.870974	22.1053	5.99999	4419.25	0.0543105	0.118611	20.0526	7.73458	3123.83	1467.9	0.469903	1806	1579	961	2736	6903	4842	5274	658	2941	4458	2946	3140	2027	1787	1884	2151	2880.81
254	106522	0.0419656	0.0867083	24	0	1252.99	0.635816	1	24.0327	6.63e-05	5537.48	0.123373	0.23477	24.0163	3.31e-05	3931.68	2320.36	0.59017	3772	3970	6088	8320	1857	3229	2714	3084	2235	1620	2253	3516	2397	2759	4445	10628	3930.44
255	106742	0.0065055	0.0205398	18	6	353556	0.250443	0.616362	20	6.00001	2.03097e+06	0.0120885	0.03514	19	6.01667	1.5482e+06	378912	0.244745	1671234	1728185	1492033	1688777	2191192	1832313	1989625	2110761	1527408	1553710	201381	377912	1677833	1707498	647960	1638641	1.50228e+06
257	109386	8.88e-07	2.58e-05	18	9	719.658	0.0400074	0.221664	20	6.00002	2047.5	6.45e-07	2.09e-05	19	7.60001	1267.36	823.692	0.649929	376	310	391	440	2061	1847	2036	2246	1204	1033	1232	1327	1199	664	543	778	1105.44
258	109997	1.91e-05	0.000211771	18	9	6052.3	0.0823985	0.298914	20	6.00001	15191.8	2.26e-05	0.000218931	19	7.60001	9255.05	6339.02	0.684925	3619	2376	2654	3541	14357	18793	7366	20251	8473	11058	9007	7376	4714	6713	3936	3909	8008.94
261	110014	7.77e-06	0.000128434	18	9	2848.58	0.0163368	0.211033	20	5.99998	11361.8	2.14e-06	4.78e-05	19	7.59999	5015.77	5218.8	1.04048	832	594	1050	905	13030	11158	10926	10333	2320	3357	2316	2302	1579	888	966	1282	3989.88
264	110031	0.0419656	0.0867083	18	9	1797.11	0.0252924	0.211033	20	6	11915	0.00833011	0.0260084	19	7.6	6656.06	3956.45	0.594412	3700	3214	2418	5135	12403	11276	12159	11822	3064	4342	3899	5047	2563	3236	3384	6391	5878.31
265	110123	0.0144977	0.0373749	18	9	6189.13	0.174953	0.48515	24.0327	6.00001	32093.5	0.0176966	0.0474318	21.0163	7.87756	27758.2	6894.56	0.248379	21657	21800	21751	20317	37625	28748	33027	28974	28805	34502	35216	28937	27074	29659	9166	22498	26859.8
266	110125	0.0419656	0.0867083	24	12	2731.55	0.194918	0.524971	23.52	12	18213	0.0474929	0.10648	23.76	12.0012	15329.9	3355.57	0.21889	12475	12292	14103	11580	18312	14480	16521	14493	16496	19887	19618	16851	16623	18010	10923	12196	15303.8
267	110131	0.0065055	0.0205398	24	15	20811.2	0.082618	0.298914	21.5648	12	147300	0.0045839	0.0163047	22.7824	13.4583	119283	34370	0.288138	110193	100768	85290	92224	109227	116188	118548	109076	141389	150767	163713	133329	116703	146550	116151	87968	118630
268	110134	0.00421867	0.0149426	18	9	7147.44	0.206037	0.544937	23.3952	5.99999	66066.2	0.00699527	0.0228566	20.6976	7.82848	59524.7	7609.28	0.127834	60125	51313	47262	47812	67713	63253	71843	61456	61386	60852	65673	57767	45594	62283	56428	54279	58439.9
272	110359	0.0144977	0.0373749	24	15	13735.7	0.284914	0.661659	25.2722	12	135321	0.0268048	0.0653789	24.6361	13.5478	121748	14077.3	0.115626	112801	117426	96162	99972	129933	101594	123390	110336	126522	157425	123542	133795	128624	150942	119415	118722	121913
273	110371	0.000572095	0.00305238	24	9	4972.73	0.0746939	0.29287	20	6.00001	17934	0.00047264	0.00250588	22	7.42501	8563.13	7406.16	0.864889	3415	3255	3760	4010	28783	14380	12508	16065	5454	10352	7192	3668	6374	3154	3341	1354	7941.56
274	110413	8.77e-05	0.000697384	18	9	5967.8	0.18115	0.495959	20	5.99999	28497	0.000191417	0.00121327	19	7.59999	22000.2	7606.94	0.345767	11815	13824	15603	15531	42337	25708	23531	22412	22760	24397	19904	23463	18920	16070	14092	17710	20504.8
276	110501	0.000320124	0.00195554	24	9	2404.69	0.0149162	0.211033	20	6.00001	9314.75	6.33e-05	0.000503248	22	7.42501	5067.86	3416.58	0.674165	2244	2641	3956	3262	8578	9127	9740	9814	4269	5136	3036	4905	3322	2753	1953	1762	4781.12
280	110962	0.00421867	0.0149426	24	9	599.98	0.160168	0.450073	20	6.00001	3432.75	0.00560813	0.0192181	22	7.42501	2073.89	1059.21	0.510733	1686	1440	1393	777	2368	3642	5310	2411	1668	1662	1787	1963	1146	2019	1171	1317	1985
283	111740	8.77e-05	0.000697384	18	9	2566.62	0.0663822	0.274912	20	5.99999	11326	7.6e-05	0.000552225	19	7.59999	4836.26	5219.04	1.07915	865	526	720	1129	9777	15254	16154	4119	2248	2831	2396	1276	1110	1177	776	607	3810.31
289	113563	0.00267199	0.0105751	18	12	1681.15	0.0775021	0.298914	20	12	6606.5	0.00196366	0.00803576	19	12.0333	4604.16	2317.03	0.503247	3533	3401	2646	2451	4473	5428	5067	4545	6800	7612	7437	4577	1139	4879	2845	2454	4330.44
290	117034	7.77e-06	0.000128434	18	9	1618.92	0.0178274	0.211033	20	6	5145.5	2.33e-06	4.78e-05	19	7.6	1940.45	2435.5	1.25512	149	108	140	115	5859	5580	5380	3763	569	514	386	235	166	155	148	120	1461.69
291	117195	0.0210199	0.0507729	18	6	22923.7	0.126045	0.383596	20	5.99999	94872.8	0.0183697	0.0482901	19	6.01666	71074.2	25694.5	0.361517	63695	60386	46561	46369	97449	93509	102083	86450	66719	63357	59576	44365	71342	71358	63258	50892	67960.6
292	117196	0.0210199	0.0507729	18	9	10246.3	0.0325062	0.211033	20	6	27634.8	0.00566341	0.019329	19	7.6	12878.3	11159.9	0.866561	5233	4800	3956	4112	27591	23417	39165	20366	8076	6521	4636	4013	4889	4812	4231	5135	10684.6
294	117235	2.22e-07	1.25e-05	18	9	1345.62	0.0262227	0.211033	20	6	3387.25	1.16e-07	1.08e-05	19	7.6	1623.48	1668.15	1.02751	161	230	212	221	3980	3555	3898	2116	1899	1361	937	858	336	321	284	360	1295.56
296	117535	0.00164724	0.00708482	18	9	1453.63	0.0790963	0.298914	20	6	4381.5	0.00129584	0.00577985	19	7.6	1764.49	1971.8	1.11749	245	307	185	305	6295	2406	6468	2357	610	679	421	264	311	292	246	639	1376.88
298	117769	0.000320124	0.00195554	24	6	9799.09	0.0440799	0.223696	20.0911	6	20785.8	0.000171711	0.00111348	22.0456	6.04753	9460.59	9579.86	1.01261	5457	21497	3538	3542	24973	17508	18041	22621	5840	4360	3456	2359	2189	1971	3008	1706	8879.12
299	117790	0.0144977	0.0373749	18	9	90.6864	0.132869	0.396874	20	5.99999	465.5	0.0139698	0.0393866	19	7.6	286.445	149.79	0.522928	102	119	96	473	465	464	592	341	247	137	203	326	124	176	167	80	257
301	118125	0.0210199	0.0507729	24	9	315.9	0.161591	0.452562	20	6	1477.5	0.0227063	0.0564644	22	7.425	997.286	418.215	0.419353	483	873	645	892	1955	1336	1677	942	891	733	1229	991	878	949	344	577	962.188
302	118602	0.00421867	0.0149426	18	9	1352.7	0.0993873	0.340583	20	5.99998	6552.5	0.00368002	0.0136664	19	7.59999	3901.77	2178.3	0.558284	3007	1657	2786	1508	3909	8483	8830	4988	3502	2247	2868	2969	1846	3397	1668	1912	3473.56
306	119023	0.000572095	0.00305238	18	9	28888.5	0.0288681	0.211033	20	6	64063	0.000198369	0.00124411	19	7.6	30082.1	29780.3	0.989969	7438	5279	4769	6061	51051	84240	73357	47604	23598	23357	18996	13107	10990	14843	608	2349	24227.9
308	119060	0.00164724	0.00708482	18	9	4475.63	0.3499	0.739263	20	6	15489	0.00487538	0.0172687	19	7.6	8971.46	6433.95	0.717157	3218	2992	4072	2591	30680	8997	13034	9245	6696	14055	5592	5635	6692	2595	3192	4021	7706.69
309	119129	0.000171384	0.00126734	18	9	1810.55	0.0783913	0.298914	20	6	5982.25	0.000164144	0.00108606	19	7.6	3332	2393.44	0.718319	721	1414	802	1865	5141	3322	8344	7122	2430	2607	3112	2234	1402	1747	946	2575	2861.5
311	120929	0.00421867	0.0149426	24	12	248.548	0.472434	0.884408	24.0327	12	1585.5	0.014386	0.0402903	24.0163	12	1209.17	491.071	0.406121	828	621	1052	817	2169	1198	1164	999	1118	2477	1373	1374	1234	1087	890	950	1209.44
312	120954	0.0210199	0.0507729	24	12	3647.26	0.226823	0.581191	25.2722	12	32421	0.0302558	0.071645	24.6361	12.008	28428.6	4968.08	0.174756	28436	24159	19880	21151	31120	30049	31188	28749	29019	34364	38177	28124	26589	33713	26936	24877	28533.2
314	120986	0.0065055	0.0205398	18	9	10250.2	0.410784	0.814802	20	5.99999	41523.2	0.0185055	0.0484476	19	7.6	32293	9832.48	0.304477	24697	22429	17605	18585	56070	34013	39354	36656	32920	22641	41607	28528	31796	34818	26303	17741	30360.2
316	121468	0.00164724	0.00708482	24	6	359.917	0.0819097	0.298914	20.7529	6	1273	0.00133721	0.00590194	22.3765	6.03175	919.945	202.757	0.220401	907	1066	1124	1117	1280	1225	1335	1252	626	736	697	364	188	608	1028	1001	909.625
317	121476	0.000320124	0.00195554	18	9	900.5	0.534461	0.950529	23.9024	5.99999	1721.5	0.00165504	0.006976	20.9512	7.86739	1041.59	956.553	0.918362	160	247	171	190	2104	1996	1332	1454	499	424	503	4603	297	253	275	124	914.5
318	121482	0.0299489	0.066265	18	9	553.311	0.0464173	0.227499	20	6	2033.5	0.010535	0.0313817	19	7.6	1034.99	764.606	0.738755	392	509	426	395	1208	2515	1907	2504	881	424	365	588	643	499	421	478	884.688
319	122710	0.000320124	0.00195554	18	9	1423.05	0.0162906	0.211033	20	5.99999	5045.5	6.87e-05	0.000535854	19	7.6	2113.98	2333.91	1.10403	220	422	219	514	4386	5227	6015	4554	998	987	1010	555	313	359	336	368	1655.19
322	124976	0.0144977	0.0373749	18	9	1699.18	0.017794	0.211033	20	6	7930	0.00238951	0.00941287	19	7.6	3467.65	3429.75	0.98907	482	1570	989	556	8538	7709	8556	6917	805	2017	1670	1173	689	144	814	2066	2793.44
325	125788	0.000320124	0.00195554	18	9	2337.34	0.0821794	0.298914	20	6	8595.25	0.000303739	0.00168455	19	7.6	4715.55	3552.9	0.753444	1496	3610	1430	1197	14035	5709	8524	6113	3268	4682	3990	3248	1533	2375	1682	1382	4017.12
326	125882	1.91e-05	0.000211771	18	9	30947.6	0.0151138	0.211033	20	5.99999	183541	4.63e-06	7.51e-05	19	7.59999	75071.4	86968.8	1.15848	6007	10337	7233	4711	175214	176971	194559	187420	37270	35268	32413	15833	14160	15160	12565	2483	57975.2
327	125884	0.0065055	0.0205398	18	9	973.863	0.045296	0.224615	20	6	4251.75	0.00269026	0.0104511	19	7.6	1845.86	1852.89	1.00381	425	473	460	395	5393	5071	1805	4738	1012	1093	436	424	468	478	529	506	1481.62
328	125885	2.22e-07	1.25e-05	18	9	716.299	0.0197602	0.211033	20	5.99999	2203.75	8.88e-08	1.08e-05	19	7.59999	976.953	973.612	0.99658	204	245	199	213	1980	2747	1865	2223	532	563	416	304	248	272	301	257	785.562
329	125886	0.0065055	0.0205398	18	9	160.16	0.0278989	0.211033	20	6	464.25	0.00174496	0.00728216	19	7.6	227.153	181.048	0.797034	96	107	56	79	534	441	543	339	146	140	113	60	83	78	134	116	191.562
330	125888	0.0065055	0.0205398	24	9	167.584	0.0262049	0.211033	20	5.99999	878	0.00164968	0.006976	22	7.425	395.688	348.527	0.880813	114	230	185	196	870	1040	1016	586	252	373	147	228	76	148	144	258	366.438
331	125897	1.91e-05	0.000211771	18	9	68998.8	0.119919	0.373032	20	6.00002	244310	3.2e-05	0.000284167	19	7.60001	112782	109725	0.972898	20013	30736	20165	21703	129527	366601	363007	118105	75575	86280	63268	31517	35832	41991	29853	25225	91212.4
332	125898	0.0210199	0.0507729	18	9	370.878	0.0174964	0.211033	20	6	1416.25	0.00327613	0.0123294	19	7.6	587.751	620.94	1.05647	175	100	97	162	1704	1170	1466	1325	243	252	163	80	103	129	134	148	465.688
333	125899	4.22e-05	0.000390745	18	9	6763.83	0.01537	0.211033	20	5.99999	33364	9.89e-06	0.000117379	19	7.59999	14040	15430.3	1.09902	2202	2326	1584	2089	35071	35668	31974	30743	7325	7678	5414	3437	2210	1782	4003	2602	11006.8
334	125942	8.77e-05	0.000697384	24	9	1347.04	0.0161526	0.211033	20	5.99999	9400.75	2.05e-05	0.000203232	22	7.425	3659.54	4132.11	1.12913	946	1259	563	1549	10303	8701	10878	7721	2288	2233	1354	1701	1207	1125	780	396	3312.75
335	125960	8.77e-05	0.000697384	18	9	22323.4	0.0198278	0.211033	20	5.99999	79484.2	2.48e-05	0.000235212	19	7.6	34462.3	35317.8	1.02483	7673	8668	5763	5403	83449	69600	96376	68512	11445	22236	15584	9255	9428	12010	8013	6898	27519.6
336	126582	0.000987235	0.00470192	18	9	1481.04	0.0178285	0.211033	20	5.99999	5572	0.000210288	0.00127584	19	7.6	2385.22	2503.62	1.04964	484	497	420	459	6723	5009	5637	4919	1079	1377	1075	449	642	350	584	585	1893.06
338	127711	0.00980952	0.0282233	18	9	172.888	0.114178	0.357814	20	5.99998	864.25	0.00872996	0.0269573	19	7.59999	578.738	232.354	0.401483	399	341	406	443	793	637	1192	835	597	573	496	198	354	463	371	431	533.062
339	128047	0.0299489	0.066265	24	12	4138.87	0.329737	0.719901	23.9024	12	28184.5	0.0554765	0.120844	23.9512	12	23313.3	5479.26	0.235027	20041	18369	17960	17621	29496	23785	22891	20613	21996	31417	33601	25724	23445	30089	18787	17038	23304.6
340	128049	0.00267199	0.0105751	18	12	2160.21	0.148162	0.424503	24.0327	12	11607.5	0.00349743	0.0130457	21.0163	12.2524	8796.54	4091.34	0.465108	7107	7675	7356	5171	12552	7365	10565	10140	9188	14237	13641	9364	7629	1975	7003	4687	8478.44
342	130528	8.77e-05	0.000697384	24	9	1053.59	0.0436029	0.223696	20	5.99998	5597.5	5.15e-05	0.000417607	22	7.42499	3490.73	1659.74	0.475471	2607	2511	2896	2595	7405	4269	6045	4671	3076	3059	3585	2660	2904	2066	2258	1016	3351.44
343	130541	0.0299489	0.066265	24	12	4347.29	0.247265	0.61488	23.9024	12	29028	0.0437326	0.0985736	23.9512	12	24893.8	5625.3	0.225972	21924	17851	18271	25530	34432	24674	27605	21627	25696	31472	31681	27263	20683	25990	22340	21118	24884.8
348	130599	0.00267199	0.0105751	18	9	27749.7	0.0734798	0.290615	24.7059	12	127257	0.00187221	0.0076989	21.3529	10.5239	111381	24351.9	0.218636	89384	83726	78053	76617	127358	123279	139523	115936	121372	125672	154611	107372	93345	124247	85639	92817	108684
352	130801	0.0144977	0.0373749	24	12	396.687	0.151148	0.427609	23.3952	12	2100.25	0.0156093	0.0427227	23.6976	12.0019	1612.62	521.186	0.323193	1287	1249	954	1116	2244	1558	1343	1440	2245	1433	2355	2368	1530	1803	1594	1201	1607.5
354	131202	0.000320124	0.00195554	18	9	1759.99	0.019688	0.211033	20	5.99999	6828.5	8.18e-05	0.000584195	19	7.6	2891.92	3033.69	1.04902	261	845	533	418	8282	6720	6049	6263	1233	1533	847	673	1086	812	505	669	2295.56
356	131427	1.91e-05	0.000211771	18	9	624.552	0.0371524	0.221664	20	5.99998	2226.5	1.08e-05	0.000120244	19	7.59999	1014.47	993.43	0.979257	255	252	196	217	2584	2512	2728	1082	605	681	520	374	285	342	251	223	819.188
358	131471	0.00267199	0.0105751	24	12	1486.16	0.110212	0.351928	23.0287	12	8383	0.00268875	0.0104511	23.5144	12.0051	6527.9	2131.55	0.326529	6311	4034	4410	4764	7183	7459	6627	6042	6954	8316	10406	7856	6697	7369	4841	4643	6494.5
359	131496	0.000320124	0.00195554	18	9	1806.3	0.0604446	0.259973	20	5.99999	4190.25	0.00022935	0.00133339	19	7.59999	2588.83	1892.17	0.730895	844	371	452	525	4637	4488	3005	4631	2814	2967	3277	1935	2421	2167	443	493	2216.88
360	131511	0.000171384	0.00126734	18	9	513.36	0.0154923	0.211033	20	5.99999	2252.25	3.67e-05	0.000322662	19	7.6	938.681	1035.82	1.10348	156	95	189	171	2401	2009	2558	2041	392	361	421	320	172	223	143	109	735.062
365	133612	0.000572095	0.00305238	24	9	116.673	0.0323528	0.211033	20	6	544	0.000220205	0.00130076	22	7.425	337.469	176.127	0.521906	225	215	177	256	390	588	628	570	380	321	246	315	253	189	167	243	322.688
366	133616	0.000572095	0.00305238	18	9	162.635	0.0315505	0.211033	20	5.99998	467	0.000215197	0.00128661	19	7.59999	241.271	183.875	0.762111	53	127	101	84	349	547	567	405	161	198	146	99	111	85	106	143	205.125
367	133808	0.00267199	0.0105751	18	9	2170.64	0.344845	0.739174	20	6	11536	0.00736179	0.023687	19	7.6	8963.04	2569.79	0.286709	7717	4372	4196	9067	13016	10633	11776	10719	9818	10165	9056	5165	4730	8156	9682	7058	8457.88
371	146231	8.88e-07	2.58e-05	18	9	2135.82	0.0282168	0.211033	20	6	6574.5	4.64e-07	1.56e-05	19	7.6	3625.66	2731.28	0.753319	1133	805	689	1213	6979	5991	7057	6271	2463	3041	2856	3078	1720	1794	1658	2672	3088.75
372	146259	0.0299489	0.066265	18	6	317.844	0.578285	0.99286	20	6.00001	1633	0.0875641	0.175336	19	6.01667	1232.13	449.782	0.365044	989	1209	199	1176	1221	1691	2044	1576	949	955	1173	1103	1168	1070	1256	1063	1177.62
373	146262	2.22e-07	1.25e-05	18	9	785.949	0.0153559	0.211033	20	5.99998	3231.25	6.99e-08	1.08e-05	19	7.59999	1380.08	1515.37	1.09803	228	181	173	165	3576	3135	3349	2865	707	828	609	499	291	238	230	241	1082.19
374	160854	0.000320124	0.00195554	18	9	17711.3	0.017086	0.211033	20	6	95746	7.17e-05	0.000536931	19	7.6	45407.1	37783.1	0.832097	17128	16061	14167	19422	108516	94519	95270	84679	19549	23007	22238	18232	19059	18645	17773	19411	37979.8
376	161387	0.0144977	0.0373749	18	9	729.027	0.482374	0.893717	20	6	3415	0.0416998	0.0947518	19	7.6	2588.29	730.523	0.282241	410	2059	2217	2051	3580	3190	3490	3400	2385	3007	1847	1874	2818	2198	2309	2280	2444.69
379	167348	2.22e-07	1.25e-05	18	9	83145.5	0.0405479	0.221664	20	6.00002	208770	1.76e-07	1.08e-05	19	7.60001	139501	79195.4	0.567705	44935	46945	65621	44064	238007	187665	215283	194125	113647	142898	147922	162085	86070	110112	91313	92235	123933
381	170278	4.22e-05	0.000390745	18	9	381.838	0.0472832	0.229079	20	6	944.75	2.82e-05	0.00025536	19	7.6	501.9	413.131	0.823133	148	129	110	184	1221	1044	941	573	291	687	363	263	266	163	172	176	420.688
390	170728	0.00980952	0.0282233	24	15	4405.63	0.444877	0.856236	21.1511	12	34073.2	0.0280798	0.067497	22.5755	13.4589	28462.6	6412.61	0.2253	22958	25623	23043	26910	9633	27584	30112	30819	30009	35809	37288	33187	29142	33675	26161	31242	28324.7
391	170736	0.0144977	0.0373749	24	12	674.757	0.196519	0.527597	23.6461	12	3865.75	0.0195468	0.050546	23.8231	12.0007	3067.35	907.303	0.295793	2317	2354	1741	2787	4153	2975	2811	2916	2762	4289	4538	3874	3586	2678	2304	2909	3062.12
392	170766	0.0144977	0.0373749	24	15	4059.85	0.0990293	0.340583	22.4427	12	28836.2	0.0108339	0.0320456	23.2214	13.4648	22577.1	7694.32	0.340802	19987	16251	12897	19478	27565	19406	18600	20700	24276	32066	32565	26438	24597	25151	19946	19728	22478.2
393	170791	0.00267199	0.0105751	24	12	8527.71	0.114123	0.357814	24.1644	12	51212.8	0.00277352	0.0106761	24.0822	12.0001	43061.3	10227.9	0.23752	36677	35985	29435	36209	55771	41769	43268	44388	42897	54577	58057	49320	40949	47751	38924	33444	43088.8
398	187301	0.0210199	0.0507729	24	12	8289.94	0.14457	0.422106	24.0327	12	55066	0.0206528	0.0526316	24.0163	12	47461.2	9973.26	0.210135	46882	39691	35331	37602	56669	48934	53957	44505	51176	54903	61112	53073	41446	53839	45517	34827	47466.5
399	187303	0.0144977	0.0373749	24	12	6946.26	0.168075	0.469162	24.5682	12	31575.2	0.0170986	0.0461991	24.2841	12.0016	25412.9	8498.78	0.334428	22176	16205	16144	17861	40289	26343	27688	22865	30869	35776	33692	25964	25830	27867	23150	15159	25492.4
400	187304	8.77e-05	0.000697384	18	9	15271.4	0.0331886	0.211033	24.2975	6	71670.8	4e-05	0.000344158	21.1488	7.89841	61164.4	14091.8	0.230392	46918	44053	50764	40499	71903	69928	77733	67119	60515	68973	75551	64059	54247	59195	48904	50069	59401.9
403	187855	0.00267199	0.0105751	24	0	1945.6	0.221027	0.574701	25.7143	6.63e-05	4915.98	0.00498121	0.0174965	24.8571	3.21e-05	2300.77	2407.93	1.04658	4381	3496	3698	8089	1494	685	726	791	745	484	905	605	1186	848	1460	6239	2239.5
406	204696	2.22e-07	1.25e-05	18	9	4345.88	0.0302638	0.211033	20	6	10207.2	1.33e-07	1.08e-05	19	7.6	4930.2	4914.77	0.996871	629	649	637	836	14034	10973	6779	9043	3194	3789	3723	4182	1228	1173	1001	1555	3964.06
408	209676	1.91e-05	0.000211771	18	9	4254.66	0.0660362	0.274912	20	5.99999	11757	1.84e-05	0.000186747	19	7.59999	8457.39	4001.98	0.473194	4156	3367	4809	3292	9117	12465	13724	11722	7583	7118	10364	10487	5030	7614	5773	6110	7670.69
409	209677	0.00164724	0.00708482	18	9	261.63	0.47831	0.888902	23.7736	6	676.5	0.00641829	0.0214707	20.8868	7.85741	434.126	295.992	0.681811	102	103	139	161	1401	385	418	502	217	775	754	371	471	151	187	168	394.062
411	210259	7.77e-06	0.000128434	18	9	4713.22	0.0177145	0.211033	20	5.99999	22223.5	2.31e-06	4.78e-05	19	7.59999	9603.37	9996.32	1.04092	1332	1885	1396	1656	23953	19931	23190	21820	4326	5265	4734	2250	1859	2063	3910	2643	7638.31
412	210272	0.00164724	0.00708482	18	9	8066.32	0.419778	0.825718	20	5.99999	21742.2	0.00572313	0.019454	19	7.6	13263.1	10167.3	0.766585	1367	1946	4452	3061	44172	12302	13064	17431	8564	26691	10524	11896	13308	5599	3439	2415	11264.4
413	210291	4.22e-05	0.000390745	18	9	277469	0.0158583	0.211033	20	6	1.5594e+06	1.02e-05	0.000117548	19	7.6	646211	690121	1.06795	118812	113626	165054	123400	1393606	1757259	1453379	1633350	162292	238161	251581	180896	139672	132501	145035	160153	510549
414	210297	1.91e-05	0.000211771	18	9	58705.1	0.0150162	0.211033	20	5.99999	361704	4.61e-06	7.51e-05	19	7.59999	154224	165324	1.07197	27266	32113	21309	22022	374455	372041	361989	338330	77793	85171	65745	39074	35277	39588	30064	25368	121725
415	210345	0.000987235	0.00470192	24	12	811.051	0.0302055	0.211033	22.6735	12	4644.75	0.000340554	0.0018642	23.3368	12.0097	3401.33	1241.24	0.364929	2500	2303	1898	2463	3745	3151	3046	3271	4722	5058	5198	3601	3112	3912	3276	2743	3374.94
416	210405	0.00980952	0.0282233	18	6	436.992	0.0281726	0.211033	20	6	1009.75	0.0025408	0.00996231	19	6.01667	544.273	483.456	0.888261	341	304	215	272	851	1056	1126	1006	292	439	232	251	315	332	313	426	485.688
417	210798	0.0121536	0.0348487	24	21	267.817	0.0860164	0.307254	20	17.9999	1344.75	0.00822043	0.0257614	22	19.525	1163.45	238.075	0.204628	1430	1312	1296	1429	927	889	722	943	969	1029	1164	1478	1367	1167	1367	1478	1185.44
419	210841	0.0144977	0.0373749	24	9	355.851	0.0998388	0.340705	20.1831	6	4089.75	0.0109107	0.0321571	22.0915	7.42584	3288.26	593.211	0.180403	2940	3143	2742	3426	4153	4029	4938	3239	2619	3258	3178	3316	2284	2935	2841	2810	3240.69
422	210890	0.0065055	0.0205398	18	0	508.056	0.451792	0.865592	24.0327	17.9999	3317.75	0.0200732	0.0515906	21.0163	18.3786	3132.68	445.442	0.142192	3848	3351	3764	3710	2015	2854	3513	2485	2932	2991	3130	3187	2909	3294	3387	3681	3190.69
423	210993	0.000320124	0.00195554	18	9	3546.49	0.0293523	0.211033	20	6	8593.75	0.000118161	0.000813862	19	7.6	3726.56	3731.02	1.0012	660	974	720	688	11461	6841	6818	9255	599	1863	1489	1792	1065	1133	1144	1388	2993.12
425	211140	0.0210199	0.0507729	24	12	4467.5	0.20621	0.544937	21.8859	12	18834.8	0.0279192	0.067497	22.9429	12.0255	13911.5	6167.25	0.443321	10206	7824	9048	13944	21420	13608	9326	15893	21159	23110	13886	17184	13033	10289	10806	8563	13706.2
426	212396	0.0144977	0.0373749	24	21	1600.54	0.276301	0.648807	20	17.9999	12482	0.0261175	0.0641896	22	19.525	11086	1523.44	0.137421	13095	11055	13014	11428	10237	8228	7870	10070	12789	12941	8475	10496	13969	13217	11003	11739	11226.6
428	213019	1.91e-05	0.000211771	18	9	4652.41	0.0148925	0.211033	20	5.99999	24527	4.57e-06	7.51e-05	19	7.6	10045.9	11377.8	1.13258	1077	1075	874	2697	26948	23588	25701	21871	4447	4305	3473	2794	1693	1677	1341	1388	7809.31
429	215633	4.22e-05	0.000390745	18	9	6626.47	0.0763538	0.297992	20	6	18749.5	4.39e-05	0.000366815	19	7.6	10063.5	7488.55	0.744129	4586	3255	3072	3287	29112	14392	13646	17848	6390	10167	5602	6402	6626	5308	3569	4201	8591.44
431	215656	0.0210199	0.0507729	24	15	2723.6	0.12432	0.382487	20.5594	12	15317.8	0.0181542	0.0481007	22.2797	13.4645	11528.1	4634.14	0.401987	10298	8083	9090	8218	12293	9537	9914	9530	13259	15369	18533	14110	12840	14956	8290	8305	11414.1
434	215775	0.0144977	0.0373749	18	0	327.39	0.208633	0.547904	24.7059	17.9999	1591.5	0.0205708	0.0526316	21.3529	18.455	1433.93	315.801	0.220235	1832	1391	2025	1945	1436	1255	1299	874	1198	1201	1317	1385	1532	1361	1471	2002	1470.25
435	215866	0.000572095	0.00305238	18	9	6055.31	0.102514	0.342159	20	5.99999	36594.8	0.000630108	0.00316179	19	7.59999	31028.1	6579.16	0.212039	27727	23619	22765	21993	43483	33202	36222	33472	29853	33889	34539	28142	25567	30220	25924	25140	29734.8
439	223071	0.000171384	0.00126734	18	9	639.225	0.0345595	0.215805	20	6	1821.75	7.72e-05	0.000556349	19	7.6	1120.59	628.715	0.561056	586	511	543	586	1547	2247	1797	1696	1109	807	853	903	943	711	475	638	997
440	223080	0.000572095	0.00305238	18	9	13665.9	0.0165132	0.211033	20	5.99998	59078	0.000118749	0.000813862	19	7.59999	25786.5	27362.6	1.06112	4248	3766	2798	5163	60252	60141	62849	53070	16390	16404	14306	4770	7988	7855	3883	2639	20407.6
442	223087	0.00421867	0.0149426	18	9	2804.03	0.337054	0.730428	20	5.99999	7023.25	0.0107437	0.0318905	19	7.59999	5076.91	2320.84	0.457136	2069	2249	1895	2507	6528	5823	9692	6050	6271	5845	2019	6727	4823	5717	2639	3077	4620.69
443	223096	0.00267199	0.0105751	18	9	1564.47	0.1116	0.35368	20	5.99999	3081.5	0.00271887	0.0105138	19	7.59999	1920.91	1360.97	0.708502	537	236	556	582	2812	3505	3720	2289	1777	722	2577	3030	1115	2063	478	455	1653.38
444	223098	7.77e-06	0.000128434	18	9	18083	0.0227089	0.211033	20	5.99998	38915.5	2.92e-06	5.59e-05	19	7.59999	16259.3	18521.5	1.13913	2046	1294	1991	1043	27633	43273	49471	35285	8967	7384	7377	5869	3187	3722	1346	2006	12618.4
446	223126	0.0065055	0.0205398	18	9	2107.89	0.671501	1	24.1644	6.00002	5411.75	0.0281037	0.067497	21.0822	7.8879	3734.53	1812.8	0.485416	312	2081	2315	1493	5679	8211	7402	355	4165	4427	3589	4081	4072	3487	1665	2714	3503
447	223134	8.77e-05	0.000697384	18	9	2876.86	0.0360629	0.221664	20	5.99999	6065.5	4.32e-05	0.000364269	19	7.59999	2898.15	2546.19	0.878558	820	854	959	830	8832	5185	5068	5177	1601	2154	1378	1223	1500	817	960	1004	2397.62
448	223135	0.00980952	0.0282233	24	12	4600.08	0.089445	0.313963	23.7736	12	23717.5	0.00705311	0.0229566	23.8868	12.0003	18885.8	5628.44	0.298025	15517	14714	14125	12572	23285	18726	18658	19335	22050	25581	26573	20666	21121	21422	15315	12180	18865
449	223149	2.89e-06	6.76e-05	18	9	7490.38	0.0239114	0.211033	20	6	19006.2	1.21e-06	2.99e-05	19	7.6	10476	8306.88	0.792943	3846	3111	2379	2274	23075	19544	15761	17645	10098	10340	8838	6688	5455	5036	4468	2931	8843.06
451	223248	0.000320124	0.00195554	18	9	1412.8	0.0489076	0.234256	20	6	5950	0.00018889	0.00120632	19	7.6	4137.66	1741.52	0.420896	3101	2515	2779	2718	6806	5250	7045	4699	3879	3879	4511	3078	1231	3503	2800	2931	3795.31
453	223335	0.000171384	0.00126734	18	9	724.077	0.0566675	0.250108	20	6.00001	2385.5	0.000121808	0.0008281	19	7.60001	1171.69	1020.94	0.871336	340	391	260	303	2918	1088	3032	2504	461	1115	767	588	595	499	329	346	971
455	223946	0.00164724	0.00708482	24	12	363.806	0.0687927	0.280156	24.8451	12	1325.25	0.00114285	0.00520769	24.4225	12.0036	1036.25	394.528	0.380727	454	758	664	826	1341	1364	1271	898	1321	1440	1433	1107	1175	1085	820	711	1041.75
456	224095	8.77e-05	0.000697384	18	9	969.09	0.0160513	0.211033	20	6	3458.75	2.04e-05	0.000203232	19	7.6	1789.63	1531.84	0.855953	533	492	550	529	3391	3209	3980	3255	1130	1050	1729	1633	525	737	500	573	1488.5
458	224100	0.000987235	0.00470192	18	6	2740.22	0.01888	0.211033	20	6.00001	6202	0.000221622	0.00130076	19	6.01667	3345.07	2834.17	0.847268	2018	2181	1811	2611	7095	6038	6301	5374	1336	1891	1407	1522	2397	1853	1977	2214	3001.62
459	224423	0.0299489	0.066265	18	9	992.778	0.0256371	0.211033	20	6	4515.75	0.00627448	0.0211575	19	7.6	2429.37	1542.95	0.635123	1381	735	2037	1042	5337	4459	4747	3520	1395	1425	1479	1225	1017	1295	1201	1722	2126.06
462	225754	0.0419656	0.0867083	24	6	1725.69	0.0312353	0.211033	20	6	19088.5	0.0100108	0.0299259	22	6.05	7648.43	10646	1.39191	4167	2806	4344	2160	23236	23281	19627	10210	4169	3241	1994	1822	2913	2940	1995	2904	6988.06
465	228291	0.0299489	0.066265	24	12	3660.69	0.31774	0.707003	25.1282	12	24629	0.0538107	0.117825	24.5641	12.0063	21548.3	4298.35	0.199476	19555	18094	16825	14910	29004	21801	23776	20350	23000	28914	26040	20562	20885	26120	19097	17122	21628.4
466	228300	0.00980952	0.0282233	24	12	15924.6	0.0832943	0.300073	24.2975	12	83429.5	0.00662631	0.0218202	24.1488	12.0004	67426.7	19202.8	0.284795	55474	53314	45434	47765	85784	64799	71328	68488	79131	95336	84546	74705	77406	75087	48772	52959	67520.5
469	228316	0.000572095	0.00305238	24	12	2170.11	0.0403084	0.221664	23.7736	12	7339.75	0.000269283	0.00153382	23.8868	12.0003	5183.5	2741.57	0.528904	3344	3037	3208	2815	7153	5938	6219	4801	7051	8618	8118	5572	4720	5832	3436	2912	5173.38
470	228318	0.00267199	0.0105751	24	12	2986.82	0.0897616	0.313963	23.9024	12	18901.2	0.00223906	0.00894562	23.9512	12	15257.1	4188.37	0.274519	13635	12558	10783	9813	16158	17076	14474	16456	19319	17847	22610	15829	13611	18205	13932	11701	15250.4
472	228360	0.000320124	0.00195554	18	9	35216.4	0.0550049	0.245657	20	6.00001	106373	0.00021037	0.00127584	19	7.60001	55729.2	42872.8	0.769305	32939	15820	16748	7135	145965	79124	83280	117123	30817	49336	29415	40080	21214	18057	26332	43437	47301.4
477	229314	0.00164724	0.00708482	18	9	3765.52	0.0459121	0.226339	23.9024	6.00002	21383.8	0.000793317	0.00379981	20.9512	7.8674	18409.9	3913.01	0.212549	15153	12994	14748	15120	22500	20885	22119	20031	19121	19112	22646	19174	16616	18994	12941	14087	17890.1
478	229362	0.0065055	0.0205398	24	12	4355.07	0.254074	0.618637	24.4321	12	32566	0.01224	0.0353366	24.2161	12.001	28588.6	5758.9	0.201441	26752	25643	19153	23682	38550	27483	30129	29857	32502	38406	31630	27726	27663	28759	28797	21340	28629.5
479	229423	0.0299489	0.066265	24	9	3707.18	0.497767	0.913018	20	5.99999	45708	0.0776072	0.159568	22	7.42499	40490.4	5273.25	0.130234	37336	34961	29832	44154	57098	39583	44385	41766	40280	45303	40888	38185	36239	36998	37002	36756	40047.9
481	232329	0.00421867	0.0149426	24	9	1272.79	0.233901	0.589079	23.52	6	15813.8	0.00781614	0.0248642	23.76	7.48561	13823.8	1625.22	0.117567	13387	11842	13540	15926	19430	14320	15598	13907	13687	14507	13446	13691	10966	12027	12161	12479	13807.1
483	232331	0.0299489	0.066265	24	6	3372.55	0.29242	0.671689	20.1831	6.00001	32711	0.05025	0.110877	22.0915	6.04512	27708.9	3944.44	0.142353	30049	29088	25760	26068	39980	27507	33602	29755	28371	27442	21114	22381	19002	25558	27037	26883	27474.8
485	232366	0.00980952	0.0282233	24	12	1178.75	0.198876	0.530547	21.5648	12	7823.5	0.0141234	0.0396867	22.7824	12.0344	6343.42	1625.58	0.256262	5760	3968	4735	6113	7837	5966	6691	4900	7307	8029	8603	7355	6368	6930	4123	5821	6281.62
489	250811	0.000572095	0.00305238	24	9	174056	0.027328	0.211033	20	6	444254	0.000188643	0.00120632	22	7.425	211346	204097	0.965698	161205	98603	13844	12127	418152	565378	406558	386930	104765	233589	269746	171179	94871	67285	81003	22240	194217
495	335967	1.91e-05	0.000211771	24	9	976.514	0.0146727	0.211033	20	5.99999	6668.5	4.51e-06	7.51e-05	22	7.425	3692.46	2195.7	0.594645	2586	2601	2278	2179	7525	5968	7175	6006	2816	2990	2732	2958	2393	1928	2403	1593	3508.19
498	342012	0.00267199	0.0105751	18	6	2604.27	0.0365736	0.221664	20	6	5438.25	0.00100005	0.00465769	19	6.01667	2876.2	2601.63	0.904535	1528	1671	1798	1386	6038	5491	5400	4824	932	1568	1208	1236	3411	1573	1206	1705	2560.94
499	342074	0.0210199	0.0507729	24	0	14909.5	0.401385	0.804193	23.3952	6.63e-05	48767.9	0.0487251	0.108665	23.6976	3.36e-05	38212.5	20873.4	0.546246	49377	61949	35724	48022	16859	40840	34978	32280	21114	15061	25991	28288	27260	38029	87495	51544	38425.7
503	342950	0.0419656	0.0867083	18	0	130464	0.367171	0.762377	24.0327	17.9999	354827	0.0797059	0.162693	21.0163	18.3786	242506	146479	0.604021	274436	313132	374023	568802	119352	211778	101100	135612	148162	92196	119843	307528	149928	205763	432760	630863	261580
511	345862	0.00421867	0.0149426	18	15	2355.73	0.0378582	0.221664	20	12	9038.75	0.00155593	0.00669209	19	13.6167	6095.34	3301.09	0.541575	6313	6178	4218	5124	4383	4365	3396	2774	9415	10332	9178	7230	6159	7026	6325	4598	6063.38
512	346701	7.77e-06	0.000128434	18	9	1559.88	0.0148717	0.211033	20	5.99999	8518.5	1.96e-06	4.59e-05	19	7.6	3405.15	3995.99	1.17351	428	443	335	261	8899	9062	8422	7691	1352	1565	1092	580	488	524	432	340	2619.62
515	350642	0.00980952	0.0282233	24	12	3886.44	0.103595	0.342472	21.4599	12	21151.5	0.00801963	0.0253204	22.7299	12.0376	15837.7	5668.18	0.357891	13924	11742	10317	10261	17036	15795	13605	15811	19758	23171	23597	18080	17639	18834	8176	12072	15613.6
523	355637	0.00267199	0.0105751	24	12	1645.44	0.0515342	0.2387	24.4321	12	7256.5	0.00136191	0.00597961	24.2161	12.001	5830.49	1946.08	0.333777	4625	4260	3979	3964	7451	6504	6682	6069	6694	8324	7770	6238	5833	6622	4593	3901	5844.31
524	355700	0.0419656	0.0867083	24	9	2097.81	0.320428	0.707003	20	6	23773.5	0.0713898	0.149597	22	7.425	14634.1	6607.79	0.451535	11290	12428	10677	11461	33523	15117	35584	10870	15994	13013	12514	6508	11248	10058	11460	3527	14079.5
525	355819	0.000987235	0.00470192	24	12	917.294	0.0580393	0.253508	25.2722	12	6516.75	0.000616945	0.00311428	24.6361	12.008	5561.44	1151.45	0.207042	4813	4192	4053	4357	6191	6104	6363	5139	5700	6698	7360	6309	5856	6207	5011	5018	5585.69
526	355856	0.000987235	0.00470192	18	9	1533.71	0.0895785	0.313963	24.5682	6.00003	6470.5	0.000913821	0.00430364	21.2841	7.92002	5378.3	1729.55	0.321579	4012	1876	3974	3723	7840	5716	6640	5686	5664	7803	5983	6132	5295	5414	4109	2875	5171.38
529	357025	0.00421867	0.0149426	24	12	1659.58	0.0303058	0.211033	24.0327	12	5318.75	0.00127398	0.00571259	24.0163	12	4025.57	1961.88	0.487353	2722	2742	2538	2933	6128	4815	5064	4111	5263	6023	5444	4545	4089	3238	2712	2059	4026.62
537	370158	1.91e-05	0.000211771	18	9	670.337	0.0180415	0.211033	20	5.99998	2897.5	5.47e-06	8.08e-05	19	7.59999	1379.84	1237.9	0.897133	332	256	391	510	2826	2753	3310	2701	623	809	768	904	522	405	386	688	1136.5
539	370904	8.88e-07	2.58e-05	18	9	278.954	0.0422644	0.223696	20	6	824.75	6.79e-07	2.12e-05	19	7.6	507.636	304.009	0.598871	129	234	185	272	957	824	630	888	467	490	341	460	338	276	351	324	447.875
543	376826	0.000171384	0.00126734	18	9	960.251	0.032026	0.211033	20	6.00001	3324.75	7.2e-05	0.000536931	19	7.60001	1930.85	1165.75	0.60375	686	745	994	1143	3567	2872	3109	3751	1220	1543	1153	1688	1371	1045	846	1494	1701.69
545	377213	0.000320124	0.00195554	24	9	4234.16	0.0168175	0.211033	23.6461	6	10991.8	7.07e-05	0.000536931	23.8231	7.48927	7319.18	4389.23	0.599689	5054	4114	3976	4374	12951	10409	10512	10095	7499	9918	10983	8910	4100	6106	3601	3974	7286
547	378571	0.0419656	0.0867083	18	9	1173.27	0.988447	1	24.8451	6	4893.75	0.173494	0.313854	21.4225	7.94237	3356.06	1714.87	0.510977	789	674	1610	1706	11585	2119	2180	3691	2168	8283	1567	3117	7001	1240	984	1855	3160.56
551	379096	0.0419656	0.0867083	24	6	1376.74	0.067179	0.274912	20	5.99997	12458	0.0193716	0.0502469	22	6.04998	10245.6	1821.88	0.17782	10714	9371	9611	9648	13165	12400	12260	12007	8880	10145	6560	10118	8882	10347	9090	8924	10132.6
553	379597	7.77e-06	0.000128434	18	9	661.852	0.0264744	0.211033	20	6	2885	3.37e-06	6.32e-05	19	7.6	1741.26	972.97	0.558772	734	758	936	1034	3167	2554	3000	2819	1223	1347	1401	1348	1107	1181	855	1336	1550
555	380135	4.22e-05	0.000390745	18	9	12051.4	0.0521301	0.24014	20	6	65732.5	3.08e-05	0.000276616	19	7.6	52579.2	13412	0.255081	39492	44028	41712	37045	72447	67854	56830	65799	55083	47844	46355	55749	46563	45727	30665	45891	49942.8
557	381214	2.22e-07	1.25e-05	18	9	1205.26	0.0438369	0.223696	20	6.00001	3047.75	1.89e-07	1.08e-05	19	7.60001	1743.79	1363.52	0.78193	424	284	419	457	4045	2808	3212	2126	1892	2071	1189	1395	909	950	865	566	1475.75
558	381608	0.0419656	0.0867083	18	6	59039.2	0.0405288	0.221664	20	6.00001	201578	0.0125463	0.0360974	19	6.01667	135039	65043.4	0.481664	127680	106061	108651	99758	162758	228985	201698	212870	53449	94086	119900	100152	81065	128035	111122	98239	127157
560	382613	0.00164724	0.00708482	24	12	12222.7	0.0444349	0.223696	24.8451	12	49336.5	0.000770186	0.0037101	24.4225	12.0036	40462.2	13251.1	0.327492	29483	28032	27132	28376	52470	43455	48576	47587	45250	55057	51767	45272	40899	47260	28622	31114	40647
562	384832	2.22e-07	1.25e-05	18	9	1223.65	0.0212893	0.211033	20	6	2955.25	9.53e-08	1.08e-05	19	7.6	1523.53	1451.85	0.952954	141	191	229	221	3539	2792	3193	2297	1095	1426	1720	1204	452	587	398	325	1238.12
565	385011	0.00980952	0.0282233	24	12	14052.3	0.0618401	0.263289	24.4321	12	74902.2	0.00510024	0.0178403	24.2161	12.001	64289.4	15986.1	0.248658	56976	53829	47500	47143	77056	69102	76311	69689	66670	81048	83948	67943	63034	68419	55746	46034	64403
567	389988	0.0144977	0.0373749	18	9	17284.9	0.0160389	0.211033	20	6	95746	0.00217796	0.00874297	19	7.6	44978.4	37700.7	0.838196	17440	16681	14766	20214	108516	94519	95270	84679	19549	21147	22301	15787	18656	16301	15392	19858	37567.2
568	390121	0.0299489	0.066265	18	9	8021.77	0.393032	0.796457	20	6	27617.5	0.0640587	0.136367	19	7.6	17371.5	9881.15	0.568813	12510	4576	6331	9965	46640	20811	11074	31945	16543	18084	21717	5403	15275	7560	5113	13319	15429.1
569	390122	0.00980952	0.0282233	18	9	42213.7	0.516958	0.933181	20	6.00002	130640	0.0318679	0.0744172	19	7.60001	84652.3	52837.4	0.624171	17479	55045	27912	24701	253770	76777	79950	112065	41155	155585	64694	89737	88635	37580	23999	39165	74265.6
572	390140	0.0144977	0.0373749	18	9	2360.15	0.338	0.730599	20	6	12478	0.0309619	0.0727565	19	7.6	9788.25	2505.99	0.256021	6959	6291	8657	7029	9823	13975	15624	10490	7508	7747	8852	12244	6440	8392	8743	9956	9295.62
573	390179	1.91e-05	0.000211771	18	9	3597.05	0.0160433	0.211033	20	5.99999	19504.8	4.9e-06	7.79e-05	19	7.59999	8364.71	8910.39	1.06524	833	1805	1510	1079	18169	20343	20787	18720	4107	4094	4182	2427	1144	2243	2804	1563	6613.12
576	390549	1.91e-05	0.000211771	24	9	5963.56	0.0250714	0.211033	20	6	16949.5	7.44e-06	9.65e-05	22	7.425	8588.65	7699.05	0.896421	3200	2610	4818	3610	12877	19882	21410	13629	9003	6502	10717	8213	4757	607	3116	2129	7942.5
577	391853	0.0299489	0.066265	24	9	18021	0.103094	0.342159	20	6	85572.2	0.0209348	0.0526807	22	7.425	62414.4	20131	0.322538	49581	31353	60334	55086	92834	92179	90474	66802	48190	50888	62481	80792	52207	52088	35633	50677	60724.9
578	391889	2.89e-06	6.76e-05	18	9	521.138	0.0796621	0.298914	20	6.00001	1427.5	3.74e-06	6.83e-05	19	7.6	818.861	602.426	0.735687	285	152	276	202	989	1798	1888	1035	689	500	876	810	359	738	318	292	700.438
579	393358	4.22e-05	0.000390745	18	9	280116	0.0157481	0.211033	20	6	1.57185e+06	1.01e-05	0.000117548	19	7.6	649085	696977	1.07378	118044	113202	163408	124387	1405246	1773898	1461206	1647037	160056	235977	249850	179370	136181	129459	141920	153953	512075
581	395930	0.00980952	0.0282233	24	12	1508.97	0.263014	0.633488	23.2718	12	6776.25	0.017957	0.047753	23.6359	12.0028	5287.77	1755.14	0.331925	4434	3539	3994	3796	7977	4794	4957	4734	5464	7329	7817	6495	7013	4289	3977	3664	5267.06
584	401994	0.0254844	0.0612061	24	3	914.289	0.246705	0.61488	21.3559	6	6062.5	0.0381581	0.0874111	22.678	4.60309	5198.55	900.993	0.173316	5630	5873	4834	6396	8033	5205	5184	5828	4277	4442	4015	4620	4164	4277	5557	4535	5179.38
585	401996	0.0065055	0.0205398	24	9	732.916	0.169882	0.472642	20	6	6151.75	0.00862887	0.0268418	22	7.425	5088.36	988.06	0.19418	5093	3586	4390	4656	7059	5431	6693	5424	5297	5200	4380	5535	4321	3293	5020	4709	5005.44
592	402267	0.00421867	0.0149426	24	12	16637.2	0.05288	0.241391	24.5682	12	89574.5	0.00209876	0.00846533	24.2841	12.0016	72782.2	21309.7	0.292788	64753	54581	50560	44897	80083	83753	78196	79542	86115	89328	104954	77901	64729	86930	62430	58952	72981.5
595	402286	0.0299489	0.066265	18	9	2386.13	0.2933	0.671713	27.3065	6.00002	7845.25	0.0503748	0.110877	22.6533	8.1521	6437.94	1737.14	0.269828	2414	5531	2653	3484	10045	8134	7857	5345	6888	7699	7112	7118	7534	8053	6054	5389	6331.88
596	403856	0.00164724	0.00708482	18	9	200.288	0.227951	0.582312	20	6.00002	751.5	0.00333709	0.012503	19	7.60001	541.58	240.132	0.443393	328	268	387	248	352	1108	920	626	503	646	552	524	429	396	329	294	494.375
597	403865	8.77e-05	0.000697384	18	9	473.408	0.0177744	0.211033	20	5.99999	1695.25	2.24e-05	0.000218931	19	7.59999	750.93	751.253	1.00043	160	219	116	180	1843	1508	1979	1451	341	363	431	274	176	257	208	146	603.25
601	413572	0.0144977	0.0373749	18	6	337.643	0.144122	0.422106	20	6.00001	1236	0.0149831	0.0416856	19	6.01667	823.635	406.504	0.493549	608	640	809	572	1207	1141	1758	838	387	627	357	789	614	729	675	639	774.375
603	416597	0.000987235	0.00470192	24	9	380.777	0.0217557	0.211033	20	5.99999	2220.25	0.000252334	0.00145697	22	7.42499	981.674	920.293	0.937473	339	370	444	390	2519	2524	1542	2296	562	871	755	383	422	347	319	388	904.438
605	417914	0.0419656	0.0867083	18	9	2896.66	0.500376	0.915004	20	6	8672.5	0.102122	0.200207	19	7.6	5847.6	2998.04	0.512697	2793	1675	3734	3852	14166	9440	10043	1041	8017	4270	5158	5398	4550	3516	3606	2873	5258.25
606	417946	0.0299489	0.066265	18	0	564.625	0.813119	1	20	17.9999	2140	0.114823	0.220996	19	18.05	1897.41	512.136	0.269913	2257	2162	2986	3052	1035	1386	1689	1376	1682	1654	1583	2717	1729	1138	2050	3643	2008.69
608	421550	0.00164724	0.00708482	24	12	1182.28	0.0566373	0.250108	24.1644	12	6627	0.000959052	0.00449156	24.0822	12.0001	5536.61	1488.36	0.268821	4980	4138	4247	4248	7527	5500	5700	5871	6166	7174	6700	6468	5580	5569	4132	4650	5540.62
609	421578	0.0299489	0.066265	18	9	3111.45	0.533885	0.950529	20	6	45708	0.0821183	0.166408	19	7.6	41163.2	4870.19	0.118314	37521	35208	30793	44154	57098	39583	44385	41766	40280	45303	40888	37902	36937	37988	36731	36756	40205.8
617	458481	4.22e-05	0.000390745	18	9	3240.67	0.0669983	0.274912	20	6.00001	12007.8	3.89e-05	0.000338353	19	7.60001	5983.23	5097.76	0.852008	2196	1658	1819	1529	15089	13718	14852	4372	4113	4190	4029	3121	1996	2533	2963	1520	4981.12
618	471785	0.0419656	0.0867083	18	6	874.514	0.152739	0.430632	20	6.00001	7990	0.0387787	0.088592	19	6.01667	7265.1	572.288	0.0787722	6898	8263	8025	6425	7470	8183	8242	8065	6270	6595	5652	6839	7666	6854	6725	6960	7195.75
619	472871	0.00980952	0.0282233	18	9	14143.2	0.221563	0.574701	20	6	42385.2	0.0154997	0.0425611	19	7.6	25385.5	16392.4	0.645741	11622	12265	11064	7489	49807	53775	58973	6986	24883	21466	22821	19693	12173	17767	11858	11967	22163.1
620	473742	0.0210199	0.0507729	18	9	2265.04	0.890933	1	25.2722	6.00001	6866	0.0932202	0.184471	21.6361	7.9774	5039.9	1890.93	0.375192	2118	3487	1060	3428	11184	4241	3702	8337	5319	8902	3645	3640	7703	3102	3893	3696	4841.06
623	474221	8.77e-05	0.000697384	18	9	4454.07	0.0340237	0.214044	20	6	13156	4.09e-05	0.000348621	19	7.6	8426.28	4675.16	0.55483	3802	4382	4639	4580	17325	11665	12469	11165	6499	9818	7499	7183	5483	5370	3896	4341	7507.25
625	475521	0.00421867	0.0149426	24	12	1675.49	0.871466	1	24.5682	6	7444	0.0242858	0.0598623	24.2841	9.03634	5223.68	2774.48	0.531135	2727	2153	2352	2621	16986	3806	4018	4966	4347	12866	5121	5529	7522	3553	2566	3028	5260.06
627	480021	0.000987235	0.00470192	18	9	721.602	0.018193	0.211033	20	6	3004.5	0.000214224	0.00128661	19	7.6	1356.71	1242.29	0.915666	277	516	430	439	3161	3389	3038	2430	453	732	540	511	521	405	506	452	1112.5
628	480022	8.77e-05	0.000697384	18	9	1256.18	0.145208	0.422106	20	6	4044.5	0.000156255	0.00105378	19	7.6	2007.09	1875.03	0.934206	229	323	400	247	1342	5410	6346	3080	1464	1917	572	1993	631	918	795	549	1638.5
629	484364	1.91e-05	0.000211771	18	9	1316.28	0.0214776	0.211033	20	6	3223.25	6.44e-06	8.62e-05	19	7.6	1621.19	1408.5	0.868806	575	358	431	467	3590	2943	3780	2580	1419	1326	766	1039	636	240	698	661	1344.31
632	509927	0.0065055	0.0205398	24	21	535.103	0.123119	0.38018	27.1385	17.9999	2668.74	0.00651148	0.021611	25.5692	19.6661	1564.65	741.503	0.473909	1273	874	1513	1535	809	800	863	1117	595	1301	1056	1890	1841	2338	2579	3917	1518.81
636	513423	0.0065055	0.0205398	24	15	2892.07	0.252248	0.616362	25.2722	12	20181.2	0.0121638	0.0352374	24.6361	13.5478	16736.4	4575.13	0.273364	13061	10820	13649	12753	24747	15285	16188	14267	19793	22559	15971	22402	19411	15669	14360	17703	16789.9
637	513549	4.22e-05	0.000390745	18	9	6200.62	0.0153396	0.211033	20	5.99999	27253.2	9.87e-06	0.000117379	19	7.59999	10990.2	12953.5	1.17864	1230	1054	995	841	29680	25669	29112	24552	5476	5226	3993	1966	197	1829	1983	1298	8443.81
639	513601	0.0144977	0.0373749	18	9	991.364	0.719683	1	20	5.99999	4560	0.05804	0.125135	19	7.6	3691.28	1022.32	0.276956	1741	3693	1188	3276	5271	3712	5051	4206	1829	4398	4128	4631	1791	3028	3971	3931	3490.31
641	514511	0.00164724	0.00708482	18	9	5254.51	0.0387401	0.221664	20	6	24221.2	0.000680231	0.00339311	19	7.6	17784.1	6073.53	0.341514	14239	13239	13357	11164	26242	21397	27106	22140	18180	16036	16558	15352	13962	16747	7679	12045	16590.2
652	1-docosanol	0.000572095	0.00305238	24	0	985.53	0.249205	0.616071	24.7059	6.63e-05	2309.74	0.00140512	0.00610574	24.3529	3.27e-05	1202.57	1265.98	1.05273	2313	1930	1911	3085	636	453	512	440	422	188	497	346	803	458	935	4087	1188.5
654	1-kestose	1.91e-05	0.000211771	18	9	5402.65	0.0145567	0.211033	20	5.99999	36247.2	4.47e-06	7.51e-05	19	7.6	15136.8	16506.1	1.09046	2603	2864	2697	2228	37503	38343	35063	34080	6268	6888	6695	3474	3422	2187	2926	3032	11892.1
659	2-hydroxyglutaric acid	0.00980952	0.0282233	18	9	50925.1	0.105163	0.346297	20	5.99998	218212	0.00812551	0.025559	19	7.59999	136670	64867.6	0.47463	92390	83363	85642	44864	298572	225292	188566	160418	102919	125908	81440	90030	117950	115056	81033	89250	123918
661	3,6-anhydro-D-galactose	8.88e-07	2.58e-05	18	9	4262.79	0.0165292	0.211033	20	6.00002	18185.5	2.79e-07	1.08e-05	19	7.60001	8576.85	7992.24	0.931838	1892	1755	2466	2013	17216	18747	20020	16759	4819	4992	4941	5186	3249	3274	2079	2684	7005.75
664	3-aminoisobutyric acid	0.00267199	0.0105751	18	9	677.232	0.184497	0.501713	20	5.99998	2216.5	0.00424701	0.015432	19	7.59999	1560.32	698.862	0.447897	535	470	1016	1282	2464	1966	1905	2531	1018	1586	1432	2028	1756	778	554	1446	1422.94
666	3-phosphoglycerate	0.00421867	0.0149426	18	0	8060.66	0.0610472	0.261232	23.2718	17.9999	23139.2	0.00238592	0.00941287	20.6359	18.2985	16537.6	7722.67	0.466976	23346	23179	22937	23804	4789	10499	10045	14498	18066	13119	6680	19292	20197	19109	25292	27959	17675.7
667	4',5-dihydroxy-7-glucosyloxyflavanone	0.0065055	0.0205398	24	9	338.351	0.0255497	0.211033	20	6	3764.25	0.00161264	0.00687109	22	7.425	1498.29	1532.3	1.0227	614	432	716	482	4871	3446	4209	2531	780	640	891	291	572	599	462	379	1369.69
668	4-aminobutyric acid	1.91e-05	0.000211771	18	9	4270.04	0.0330952	0.211033	20	6	13173.5	9.65e-06	0.000117379	19	7.6	8596.6	4505.73	0.524129	3984	4382	5325	4580	16936	11766	12590	11402	7295	9523	7531	7217	6212	5559	4193	4879	7710.88
669	5-hydroxymethyl-2-furoic acid	0.000320124	0.00195554	18	9	549.422	0.0180981	0.211033	20	5.99999	2327.25	7.57e-05	0.000552225	19	7.6	1010.67	1026.84	1.01601	115	164	283	269	2240	2099	2225	2745	348	496	411	430	440	187	149	340	808.812
671	9-hydroxydec-2-enoic acid	0.00164724	0.00708482	18	6	2009.24	0.603072	1	20	6	9218	0.00786218	0.0249166	19	6.01667	5675.14	3707.43	0.653276	2666	3829	3029	4140	5454	5993	11268	14157	1589	2445	3178	3824	2876	4628	4649	9889	5225.88
672	aconitic acid	2.89e-06	6.76e-05	18	9	57654.7	0.0159182	0.211033	20	6	224875	8.22e-07	2.3e-05	19	7.6	84014.1	108630	1.29299	2223	2011	2211	1790	243497	222028	249098	184876	25233	22000	19430	12114	5708	4094	2192	4054	62659.9
673	adenine	0.0419656	0.0867083	18	15	7069.65	0.0377925	0.221664	20	12	31468.2	0.0118101	0.0344495	19	13.6167	19263.9	12257.3	0.636284	14628	12670	18164	17329	19891	11352	9785	8056	25817	29779	34410	35867	15300	19564	15902	17809	19145.2
675	adenosine-5-monophosphate	0.00267199	0.0105751	24	6	93.5149	0.0660698	0.274912	20	5.99998	532.75	0.00170217	0.00713897	22	6.04999	380.55	127.763	0.335731	364	359	348	348	618	578	486	449	252	309	324	304	200	339	237	447	372.625
677	alanine	0.0065055	0.0205398	24	0	625470	0.141076	0.417288	20	6.55e-05	8.26479e+06	0.00733625	0.023687	22	3.6e-05	7.71908e+06	786778	0.101926	8128859	7747118	8349432	8833769	7508871	8388995	7608877	7585316	6988674	6956777	7249406	6336297	7573630	7742423	8450145	9043674	7.78077e+06
678	alanine-alanine	0.0210199	0.0507729	24	12	18688.1	0.23087	0.584673	24.9858	12	241873	0.0307098	0.0725163	24.4929	12.0049	216193	28381.2	0.131277	206464	181355	141496	217546	207256	239379	238380	202592	252611	216690	252799	245392	199631	225654	217786	221452	216655
680	alpha-ketoglutarate	0.0065055	0.0205398	24	9	12755.5	0.130287	0.39086	20	6	70353.8	0.00684261	0.0224448	22	7.425	52836.1	16052.9	0.303824	53697	24314	44261	45755	75546	64762	80590	60517	61247	54412	38236	56935	28056	40695	45285	49514	51488.9
683	asparagine	0.000987235	0.00470192	18	0	63038.9	0.071772	0.286748	20	17.9999	495005	0.000747873	0.00364426	19	18.05	456484	56446	0.123654	548001	480605	566736	492426	396677	379147	390791	362839	469151	459514	469659	504402	481486	469405	504546	524585	468748
684	aspartic acid	0.0144977	0.0373749	18	0	127545	0.148551	0.424503	20	17.9999	902711	0.0153783	0.0423658	19	18.05	806402	125299	0.155381	969408	970730	947158	888209	789693	594654	627642	623342	819975	948815	799561	747994	1038686	969803	784907	817449	833627
685	azelaic acid	0.0419656	0.0867083	24	0	623.668	0.294769	0.671713	24.5682	6.63e-05	2025.75	0.0667056	0.140934	24.2841	3.28e-05	1445.61	685.171	0.473965	1889	1898	2092	2224	937	1181	1094	1325	1646	1210	658	317	1884	1549	616	2511	1439.44
686	behenic acid	0.000572095	0.00305238	24	12	7503.46	0.0905934	0.314281	25.2722	12	19576.8	0.000563245	0.00286033	24.6361	12.008	13520.9	9006.06	0.666085	5212	6592	2885	3089	30249	12619	17784	14754	16136	19931	22005	20235	11481	14254	15678	6464	13710.5
688	beta-alanine	0.00421867	0.0149426	24	12	118689	0.105957	0.347555	23.9024	12	407980	0.00389467	0.0143371	23.9512	12.0001	303609	146684	0.483136	148603	166625	213097	275531	504867	276449	282154	401908	415578	475758	288573	452010	296452	242044	203408	210943	303375
689	beta-alanyl lysine	0.0419656	0.0867083	24	12	6212.29	0.427953	0.831254	20	12	43373.8	0.0901494	0.180085	22	12.1	33876.4	8682.73	0.256307	31250	24782	29245	29379	10144	35047	36557	35910	42800	51058	41037	38600	35779	40277	25792	26169	33364.1
691	beta-glycerolphosphate	0.000987235	0.00470192	18	9	498.687	0.257458	0.62367	20	6	1718.25	0.00235808	0.00937669	19	7.6	1177.53	524.424	0.445361	598	234	771	656	2216	1269	1907	1481	1059	1320	587	1236	1184	1042	748	883	1074.44
692	beta-sitosterol	0.0144977	0.0373749	24	6	482.954	0.950893	1	20	6	9823	0.0728457	0.152002	22	6.05	3419.39	5898.5	1.72502	1177	803	736	1480	1810	35245	965	1272	579	321	676	692	471	290	581	1758	3053.5
693	biphenyl	0.0299489	0.066265	18	9	539.346	0.0396169	0.221664	20	5.99999	3048.5	0.00917955	0.0279363	19	7.6	2142.09	705.672	0.329431	1687	1450	1838	1439	3612	2763	3234	2585	1772	2028	1518	1631	1756	1354	1866	1521	2003.38
699	cerotinic acid	0.0419656	0.0867083	24	6	441.765	0.292371	0.671689	21.8859	6	1239.5	0.0662633	0.140352	22.9429	6.01277	782.284	247.929	0.31693	512	1980	557	1028	1653	950	1568	787	427	324	422	419	624	97	844	191	773.938
701	cholesterol	0.000171384	0.00126734	24	6	10013.7	0.0237328	0.211033	20	6	22038.2	5.46e-05	0.000437993	22	6.05	9649	10821.4	1.1215	5457	18065	3538	3542	24973	22518	18041	22621	5840	4360	3456	2359	2189	1971	3008	1706	8977.75
702	citrulline	0.0065055	0.0205398	18	0	40735	0.181086	0.495959	23.52	17.9999	220017	0.00912271	0.0278902	20.76	18.3238	194018	40376.7	0.208108	253471	204162	232585	255417	146875	150080	198330	141135	170698	158826	197488	206744	170403	225101	255682	228882	199742
704	cryptochlorogenic acid	2.89e-06	6.76e-05	18	9	239.002	0.0169259	0.211033	20	6	1267.25	8.71e-07	2.3e-05	19	7.6	524.18	568.436	1.08443	67	89	71	110	1449	1156	1266	1198	209	204	164	124	118	138	125	111	412.438
708	cysteine-glycine	8.77e-05	0.000697384	18	9	545.179	0.190764	0.517087	20	6	2181.25	0.000200711	0.00124411	19	7.6	1228.48	832.917	0.678005	593	433	506	489	3683	1777	2407	858	864	1133	915	791	855	652	544	536	1064.75
709	cystine	0.0144977	0.0373749	18	0	26670.5	0.286256	0.662949	20	17.9999	118978	0.0269116	0.0653789	19	18.05	99860.8	28339.3	0.283788	172213	139938	133438	87984	85728	61863	54936	60716	102123	125096	103266	93078	158753	113993	111214	91953	106018
711	D-erythro-sphingosine	0.00536208	0.0189131	18	9	298.929	0.374135	0.774612	20	6	2029.75	0.0144674	0.0403841	19	7.6	1774.18	279.414	0.157489	1523	1394	1377	1506	2385	1582	2207	1945	1986	1638	1672	1748	1453	1624	1638	1830	1719.25
712	dimethylglycine	0.0144977	0.0373749	18	0	9755.95	0.319521	0.707003	23.7736	17.9999	25562.7	0.0295296	0.0703231	20.8868	18.3505	15682.7	12444.1	0.793496	17727	20648	27249	43361	5690	6362	11608	1635	8305	5055	9893	18230	10004	13082	30338	48827	17375.9
713	ergosterol	0.00980952	0.0282233	24	0	300.697	0.444435	0.856236	24.7059	6.63e-05	1161.25	0.0280562	0.067497	24.3529	3.27e-05	671.64	563.884	0.839563	1273	686	1053	1633	358	323	369	278	521	144	287	311	328	364	572	2146	665.375
714	erythritol	0.0065055	0.0205398	18	9	1718.62	0.07304	0.290437	20	6	5192.25	0.00411103	0.0150026	19	7.6	3308.16	1724.38	0.521249	1271	1538	1970	2061	4975	4695	4423	6676	1799	2537	2646	4242	1910	1947	1801	3016	2969.19
715	erythrose	1.91e-05	0.000211771	18	9	194.101	0.0376683	0.221664	20	6	730.5	1.09e-05	0.000120244	19	7.6	501.831	234.416	0.467121	266	254	394	267	850	860	541	671	461	478	488	499	381	276	268	338	455.75
716	ethanol phosphate	0.00980952	0.0282233	24	3	15672.8	0.129686	0.390448	26.1721	6.63e-05	54201.4	0.00975369	0.0293656	25.0861	1.56791	38512.2	14441.2	0.374976	70438	35371	65695	45302	45612	50144	51071	31928	31651	28002	18021	24053	27678	26054	18744	43143	38306.7
718	fructose	7.77e-06	0.000128434	18	9	22707.7	0.230562	0.584673	20	6.00002	95784.2	2.55e-05	0.000238822	19	7.60001	44180.7	42366.3	0.958931	10526	6352	9293	6619	109143	51176	184879	37939	16546	30328	27711	20393	10935	20594	17906	13299	35852.4
720	fucose	0.0419656	0.0867083	18	9	233.168	0.24397	0.612102	23.7736	6.00002	807.25	0.0571464	0.123524	20.8868	7.85742	637.314	225.344	0.353584	244	492	448	521	1106	563	633	927	728	849	468	882	638	368	325	517	606.812
722	galactinol	0.0419656	0.0867083	18	6	5727.92	0.0875898	0.311554	20	6	15746.8	0.024282	0.0598623	19	6.01666	9288.26	6853.49	0.737866	2824	8093	3415	6314	20535	13607	14251	14594	6787	7917	4715	4577	7954	4724	8781	6236	8457.75
724	gluconic acid	0.00980952	0.0282233	18	9	8714.56	0.270405	0.642465	25.1282	6.00001	32026	0.0183881	0.0482901	21.5641	7.96552	25745.9	6948.17	0.269875	15195	12438	14791	24316	37563	27469	31865	31207	20121	32444	29618	27768	22137	23161	20696	29121	24994.4
725	gluconic acid lactone	0.00421867	0.0149426	18	9	1525.05	0.0331181	0.211033	20	5.99999	6340.25	0.00137981	0.00602682	19	7.6	3719.55	2033.79	0.546783	2091	1457	2148	2331	6171	6743	6717	5730	2441	1262	2746	3565	2192	2407	2115	3000	3319.75
726	glucose	2.22e-07	1.25e-05	18	9	502333	0.0380078	0.221664	20	6.00002	1.31835e+06	1.65e-07	1.08e-05	19	7.60001	885150	487593	0.550859	366937	338307	410330	257219	1371382	1239756	1429553	1232690	749254	843490	988346	973407	480267	718050	671290	558525	789300
727	glucose-6-phosphate	0.00980952	0.0282233	24	6	2280.07	0.129476	0.390448	24.8451	6.63e-05	10283.5	0.00973992	0.0293656	24.4225	3.05285	8433.46	2332.81	0.276614	8268	10829	12913	9124	8468	9860	10545	11599	4018	6807	8366	7840	7614	6788	4733	7193	8435.31
728	glucuronic acid	0.0419656	0.0867083	24	6	468.812	0.330488	0.719901	21.5648	6	4472.5	0.0732026	0.15237	22.7824	6.01719	3990.17	256.965	0.0643994	4292	3724	4602	4322	4925	4660	4383	3922	2814	3695	3654	4094	3894	3876	2792	4035	3980.25
732	glyceric acid	0.00421867	0.0149426	24	9	23010	0.148058	0.424503	23.9024	6	109381	0.0052332	0.0180803	23.9512	7.49698	89992.2	24797.8	0.275555	64256	54992	85533	94199	112788	104481	105066	115190	88333	97314	94359	133669	79142	56658	59871	93197	89940.5
733	glycerol	0.0210199	0.0507729	24	9	76234.1	0.0239158	0.211033	20	6	379058	0.00432103	0.0156336	22	7.425	249761	95628.5	0.38288	204293	210521	189084	201286	445849	366029	349373	354983	206095	218642	241076	196669	138236	214576	110687	220362	241735
734	glycerol-alpha-phosphate	0.000171384	0.00126734	18	9	19322.8	0.0284428	0.211033	20	6.00001	75505.2	6.45e-05	0.000508153	19	7.60001	48170.9	23037.5	0.478245	31848	32252	27695	21163	83950	67964	80907	69200	41175	44254	34578	32727	33464	38586	30671	27842	43642.2
735	glycine	0.0299489	0.066265	18	0	97597.2	0.290837	0.671689	20	17.9999	1.08945e+06	0.0500253	0.110686	19	18.05	1.02856e+06	87637.8	0.0852043	1083764	1113319	1203317	1120583	986170	939846	839102	918945	1066330	1100628	969094	1062719	1205757	1054910	936398	1160747	1.0476e+06
742	homoserine	0.000320124	0.00195554	18	9	3555.33	0.0165132	0.211033	24.7059	12	7922.5	6.95e-05	0.000536931	21.3529	10.524	5879.35	3070.93	0.522325	705	2509	2792	2348	6993	7811	8618	7546	6824	7359	8168	9339	3656	4649	4699	4613	5539.31
744	ile-ile	0.00267199	0.0105751	24	12	17931.9	0.0807156	0.298914	24.2975	12	85002.2	0.00203632	0.00829283	24.1488	12.0004	67827.3	22708	0.334791	55297	49503	46500	46301	96318	65213	71760	73051	70493	100224	88960	80332	70157	71991	54358	46554	67938.2
745	inosine	0.0144977	0.0373749	18	9	55384.8	0.145166	0.422106	24.0327	5.99999	338684	0.0150764	0.0418074	21.0163	7.87755	297987	57327.5	0.192383	274414	267730	210696	205783	398502	353710	258644	343880	330380	354365	308963	308078	277767	284009	261721	209617	290516
746	inositol-4-monophosphate	0.000987235	0.00470192	18	6	5832.04	0.109426	0.351928	20	6.00001	11242	0.00109467	0.00503476	19	6.01667	5833.74	5420.09	0.929093	1686	1565	3360	6435	9756	9819	12871	12522	1075	1037	280	4080	1736	2879	5288	8442	5176.94
747	inulotriose	0.0299489	0.066265	18	9	174.832	0.0709408	0.286139	20	6	2150	0.0151998	0.0420112	19	7.6	1046.9	724.396	0.691944	2419	271	208	206	2564	2052	1966	2018	512	530	297	288	213	312	306	310	904.5
748	isochlorogenic acid	0.000171384	0.00126734	18	9	465.63	0.0206109	0.211033	20	5.99999	1436.75	4.79e-05	0.000395684	19	7.6	604.249	648.591	1.07338	107	163	71	80	1726	1172	1648	1201	256	257	211	205	96	95	224	116	476.75
749	isoleucine	0.0299489	0.066265	18	0	345111	0.0393779	0.221664	20	17.9999	4.64169e+06	0.00913131	0.0278902	19	18.05	4.31016e+06	358921	0.0832733	4449344	4650459	4610988	4809770	4015794	3683771	3528621	3743836	4352298	4833347	4384031	4581317	4896511	4569001	4448450	4652788	4.38815e+06
750	isomaltose	7.77e-06	0.000128434	18	9	8404.32	0.0514042	0.2387	23.6461	6.00001	18596.2	6.28e-06	8.62e-05	20.8231	7.84761	11648	7744.86	0.664908	2837	2310	3453	3077	23200	14661	18699	17825	9261	13302	14784	15467	5600	9776	8433	6607	10580.8
751	isoribose	1.91e-05	0.000211771	18	9	1035.91	0.0246766	0.211033	20	6	3787.25	7.33e-06	9.65e-05	19	7.6	2071.76	1501.36	0.724679	503	706	906	826	3575	3581	4096	3897	1391	1947	1674	1076	942	789	929	1588	1776.62
752	isothreonic acid	0.000572095	0.00305238	18	9	883.53	0.050258	0.23669	20	6.00002	3057.5	0.00032941	0.00181498	19	7.60001	1838.6	1036.98	0.564007	735	828	994	1143	3478	2810	2191	3751	1220	1543	1119	1736	1437	991	846	1334	1634.75
755	lactulose	1.91e-05	0.000211771	18	9	4645.69	0.0183461	0.211033	20	5.99999	22223.5	5.56e-06	8.08e-05	19	7.59999	9567.61	10000.7	1.04527	1332	1885	921	1656	23953	19931	23190	21820	4326	5265	4311	2250	1859	2375	3910	2643	7601.69
756	lauric acid	0.0419656	0.0867083	18	9	11477.2	0.0575145	0.252524	20	6	42503.5	0.0169597	0.045971	19	7.6	23454.8	14220.3	0.606284	16171	12299	9406	7622	55188	42011	41156	31659	21131	15377	11182	7215	19308	15284	14506	11036	20659.4
757	leucine	0.000987235	0.00470192	18	0	701084	0.0331711	0.211033	20	17.9999	8.43149e+06	0.000370922	0.00201734	19	18.05	7.76984e+06	776244	0.0999048	8253903	8215279	8683895	9016497	7196317	6708037	6593655	6446635	7773548	8009250	8168718	8224318	8715601	8072796	8323304	8614259	7.9385e+06
759	lignoceric acid	0.0299489	0.066265	24	3	503.637	0.620264	1	28	6.63e-05	3483.74	0.0926187	0.183712	26	1.62503	1696.68	527.656	0.310994	2109	7810	1219	2797	1405	891	1683	1537	895	943	1015	767	1040	738	1442	696	1686.69
760	linoleic acid	0.000320124	0.00195554	18	6	1035.56	0.0211553	0.211033	20	6.00001	1932.75	8.74e-05	0.000613852	19	6.01667	901.013	1018.73	1.13065	227	813	392	496	2216	1903	1941	1671	301	274	109	159	525	438	471	505	777.562
762	lyxitol	1.91e-05	0.000211771	18	9	3385.63	0.0388775	0.221664	20	6	9509	1.12e-05	0.000121241	19	7.6	5624.78	3654.55	0.649723	1575	1859	2459	2555	8583	8258	10357	10838	3250	4711	4803	6090	2992	2482	2745	4945	4906.38
763	maleimide	0.0299489	0.066265	24	9	18154.8	0.106566	0.348197	20	6	85638.5	0.0215341	0.0538671	22	7.425	62927.9	20046.3	0.31856	49461	31436	61405	55938	91933	93624	89553	67444	51258	50888	62481	81753	52842	52088	35436	52388	61245.5
764	malic acid	0.0065055	0.0205398	18	9	27291.1	0.122681	0.38018	20	6	169909	0.00649118	0.021611	19	7.6	135205	31301.3	0.231509	85830	122838	95493	112815	164487	148312	165872	200966	127405	142135	120192	109568	128174	120229	99791	120730	129052
767	maltose	2.22e-07	1.25e-05	18	9	377125	0.018208	0.211033	20	5.99998	1.11074e+06	8.22e-08	1.08e-05	19	7.59999	448196	538530	1.20155	16855	15893	17407	19667	1221266	877750	1111755	1232208	278237	202885	106457	145737	37932	64055	71855	57370	342333
768	maltotriose	0.000572095	0.00305238	18	9	3012.98	0.0301332	0.211033	20	6	7764.5	0.000206323	0.00126956	19	7.6	3048.08	3503.8	1.14951	218	293	363	495	8266	4789	7616	10387	613	848	647	582	415	779	621	817	2359.31
769	mannose	1.91e-05	0.000211771	18	9	128903	0.0188902	0.211033	20	5.99999	517674	5.71e-06	8.16e-05	19	7.6	235848	217384	0.921713	61657	72478	65116	64717	447045	540675	605929	477045	116956	122396	109972	74446	100511	78270	86213	66414	193115
770	melibiose	0.0210199	0.0507729	18	9	181.903	0.133233	0.396874	20	5.99998	762	0.0192619	0.0501167	19	7.59999	518.393	189.584	0.365714	345	344	270	350	906	607	658	877	420	484	394	299	521	336	395	492	481.125
773	methionine sulfoxide	0.0419656	0.0867083	24	9	27058	0.27564	0.648807	23.0287	6.00002	197237	0.0631529	0.135122	23.5144	7.47222	167322	31381.4	0.187551	154044	176951	103588	165291	226928	200367	165684	195968	199294	163495	172733	171248	126148	176734	148032	120248	166672
775	methylhexose	0.0144977	0.0373749	24	15	398.631	0.209951	0.549655	23.7736	12	3512.75	0.0206817	0.0526316	23.8868	13.4932	2913	783.535	0.268979	2797	2079	2137	2287	3930	2633	2558	2739	2819	3679	4117	3436	2850	2822	2608	3092	2911.44
776	montanic acid	0.0210199	0.0507729	24	3	398.101	0.0901295	0.313963	20	6	1687.75	0.0137708	0.039035	22	4.675	1379.52	340.754	0.247009	1648	1538	1182	2044	1588	1760	1778	1625	1066	722	1139	562	1084	1049	1554	1566	1369.06
777	myo-inositol	2.22e-07	1.25e-05	18	9	22107.5	0.0275705	0.211033	20	6	81008.2	1.22e-07	1.08e-05	19	7.6	49243.9	29000.7	0.58892	21713	22038	22732	18287	86240	80593	76041	81159	37346	49525	36914	37861	34011	33497	30281	28450	43543
778	myristic acid	0.0299489	0.066265	18	6	14835.1	0.175924	0.486241	20	6	31155	0.0329083	0.0764233	19	6.01667	18835.5	10980.8	0.582982	11377	43044	9191	7424	31373	30387	28399	34461	12074	10300	8381	6139	13161	11719	10784	11864	17504.9
788	octadecylglycerol	0.0299489	0.066265	18	9	2435.63	0.0177553	0.211033	20	6	18554.8	0.00454082	0.016289	19	7.6	8517.97	7441.56	0.873631	3231	1257	1614	6028	20098	18521	17300	18300	4272	3819	3333	2565	2898	2292	2640	4714	7055.12
789	oleamide	0.00815751	0.0256596	18	9	699.505	0.270552	0.642465	20	5.99999	4599.25	0.0157055	0.0428469	19	7.59999	3859.73	794.408	0.20582	3527	2756	2352	3429	4961	4506	5346	3584	4082	4377	3522	3291	3805	3584	2981	3154	3703.56
792	oxoproline	0.00421867	0.0149426	18	9	1.13782e+06	0.125773	0.383596	23.6461	6	5.7957e+06	0.00453207	0.016289	20.8231	7.8476	4.79671e+06	1.25949e+06	0.262573	2912320	3424531	4268852	3855465	6050991	4828721	4950869	7352232	4974817	6367735	4353893	5311795	4257679	3655867	3134754	4269851	4.62315e+06
793	palmitoleic acid	0.00421867	0.0149426	18	6	4439.04	0.016538	0.211033	20	6	8677.75	0.000737474	0.00361448	19	6.01667	4322.11	4355.48	1.00772	2164	3738	2081	1748	9824	8118	8467	8302	1860	2196	1742	1617	2477	2048	2112	2215	3794.31
794	panose	0.00344533	0.013572	18	9	1271.02	0.0199098	0.211033	20	6	3856.75	0.000726242	0.00358025	19	7.6	1425.64	1785.32	1.25229	130	120	125	88	4117	2622	4378	4310	235	229	158	114	125	97	176	171	1074.69
798	phosphoenolpyruvate	0.00980952	0.0282233	24	21	1911.49	0.150426	0.427609	24.4321	17.9999	5778.48	0.0110946	0.032475	24.2161	19.5149	3420.36	2213.82	0.647247	630	5491	5627	3699	1234	1278	834	1552	3310	3612	1051	2970	4507	3766	6711	8130	3400.12
799	phosphoethanolamine	0.000987235	0.00470192	18	0	69367.7	0.0806069	0.298914	24.4321	17.9999	161656	0.000830696	0.00395637	21.2161	18.4233	125727	64537.5	0.513312	164999	203027	210896	211215	51224	87854	69734	109983	122778	101443	53647	103363	115665	143283	146607	241071	133549
804	psicose	2.22e-07	1.25e-05	18	9	17139.2	0.0236933	0.211033	20	6	39078	1.06e-07	1.08e-05	19	7.6	19677.3	18499.6	0.940149	2504	2344	3253	3757	45297	35518	29855	45642	14087	14846	14701	19301	6754	6379	4465	7948	16040.7
805	putrescine	7.77e-06	0.000128434	24	0	5581.72	0.0117856	0.211033	23.9024	6.63e-05	22790.7	1.58e-06	3.8e-05	23.9512	3.32e-05	17486.4	7292.96	0.417064	23423	20622	22395	24723	13081	15698	15517	14640	10174	11814	11967	14210	20637	21791	19547	19731	17498.1
807	raffinose	0.000320124	0.00195554	18	9	3860.1	0.0215699	0.211033	20	5.99999	10170.5	8.9e-05	0.000619775	19	7.6	4364.12	4546.5	1.04179	829	1194	606	802	11159	12084	10371	7068	2147	2142	1859	1065	1070	895	1106	1129	3470.38
808	ribitol	1.91e-05	0.000211771	18	9	7767.92	0.0425131	0.223696	20	6	19750.2	1.22e-05	0.0001285	19	7.6	12211.9	7916.9	0.648297	3165	3376	5393	4900	20996	17861	20466	19678	7683	14115	14186	10438	5312	5774	5037	12109	10655.6
809	ribonic acid	0.00164724	0.00708482	18	9	1090.71	0.115256	0.359856	20	5.99998	6798.75	0.00181677	0.00750754	19	7.59999	3723.4	2519.83	0.676754	1428	1380	1872	2039	7700	8980	8433	2082	2187	2411	2624	2854	1894	1682	1790	2293	3228.06
811	saccharopine	8.88e-07	2.58e-05	18	9	2408.05	0.151159	0.427609	20	5.99999	8097.75	2.26e-06	4.78e-05	19	7.6	3234.56	3839.76	1.1871	329	231	309	248	16316	6037	6354	3684	743	2337	668	814	577	341	310	378	2479.75
816	sinigrin	8.88e-07	2.58e-05	18	9	2974.09	0.0201161	0.211033	20	6	7977.5	3.37e-07	1.23e-05	19	7.6	3982.7	3821.37	0.959494	662	663	736	825	9675	8240	8004	5991	4117	3715	2781	2312	822	923	861	1377	3231.5
817	sophorose	8.88e-07	2.58e-05	18	9	1150.82	0.0549994	0.245657	20	6	2687.75	8.71e-07	2.3e-05	19	7.6	1395.05	1241.48	0.889921	248	242	328	262	3516	1261	3052	2922	709	1252	1046	1573	358	471	640	536	1151
818	sorbitol	0.000320124	0.00195554	18	9	7823.78	0.226622	0.581191	24.5682	6.00001	23481.2	0.000764015	0.00370152	21.2841	7.92002	17105.3	6812.18	0.398249	11404	8337	9121	5757	31107	24134	25105	13579	17677	20803	17074	17951	15602	17865	12331	12798	16290.3
821	succinic acid	7.77e-06	0.000128434	18	9	24784.6	0.022624	0.211033	20	6	84118.8	2.91e-06	5.59e-05	19	7.6	50009	32236.4	0.644612	13661	23305	22410	20926	89192	87544	79072	80667	34477	49502	40174	45670	30682	31144	20113	30214	43672.1
823	tagatose	2.22e-07	1.25e-05	18	9	43653.9	0.0501724	0.23669	20	6	88159.8	2.15e-07	1.08e-05	19	7.6	40556.2	42303.4	1.04308	3904	2672	5152	3992	72306	67178	140795	72360	22365	27439	25047	31191	11309	10536	6911	12688	32240.3
825	tetracosanol	0.00267199	0.0105751	24	0	291.328	0.353662	0.743484	25.4179	6.63e-05	1105.75	0.00752617	0.0240324	24.7089	3.22e-05	567.852	524.135	0.923013	998	751	630	2044	425	229	312	310	207	93	299	168	401	189	420	1430	556.625
826	threitol	0.000987235	0.00470192	18	9	1179.81	0.0169043	0.211033	20	6.00001	5313.75	0.000200275	0.00124411	19	7.60001	2802.3	2144.76	0.765358	881	1306	1157	1132	5719	5103	5193	5240	1278	2142	1851	2592	436	1009	1474	1578	2380.69
827	threonic acid	1.91e-05	0.000211771	18	9	1957.63	0.0211534	0.211033	20	6.00002	5583.5	6.35e-06	8.62e-05	19	7.60001	2776.21	2314.06	0.833534	743	953	941	906	6780	4606	5613	5335	1586	2022	1497	1676	1391	1120	728	1244	2321.31
828	threonine	0.0419656	0.0867083	18	15	157625	0.125466	0.383596	20	12	963412	0.0328902	0.0764233	19	13.6167	885278	161531	0.182464	1026209	987576	904436	871291	757789	693681	716574	685610	929880	1014922	943580	965266	985726	997925	874580	784366	883713
837	uric acid	8.77e-05	0.000697384	18	0	63404.1	0.0106025	0.211033	24.2975	17.9999	93302.1	1.38e-05	0.000144062	21.1488	18.408	57356.4	58341.4	1.01717	128970	132008	110318	112566	14646	23322	17860	24977	27370	23679	22960	21787	112090	87277	93735	80108	64604.6
838	uridine	0.00267199	0.0105751	18	12	5715.9	0.0475932	0.229263	24.0327	12	69372	0.00126787	0.00571259	21.0163	12.2524	62019.2	11126.1	0.179397	55800	62855	49612	52833	73378	65407	65519	64976	67101	71417	75049	63921	53795	55279	55564	45961	61154.2
839	valine	0.0210199	0.0507729	18	0	503146	0.349787	0.739263	20	12	3.84883e+06	0.0434731	0.0982515	19	15.2	3.69179e+06	696478	0.188656	4382201	4430610	3848958	4330597	2950985	3296905	3284429	2885753	3805459	3484709	3969408	4135763	4017714	3212035	4453172	3709482	3.76239e+06
841	xylitol	0.000572095	0.00305238	24	21	25695.7	0.0812877	0.298914	24.1644	17.9999	195151	0.000510429	0.00262373	24.0822	19.5053	163914	28834.9	0.175915	158863	176511	165719	176394	115862	143086	122791	152796	153670	135134	143377	196195	179498	185100	212198	203809	163813
842	xylose	1.91e-05	0.000211771	18	9	272.413	0.0197208	0.211033	20	6.00001	817.75	5.95e-06	8.35e-05	19	7.6	527.581	327.252	0.620288	224	194	221	187	874	824	783	790	515	539	590	517	378	362	179	235	463.25

## Sheet: 0.5 cycling in TS
ID	CycID	JTK_pvalue	JTK_BH.Q	JTK_period	JTK_adjphase	JTK_amplitude	LS_pvalue	LS_BH.Q	LS_period	LS_adjphase	LS_amplitude	meta2d_pvalue	meta2d_BH.Q	meta2d_period	meta2d_phase	meta2d_Base	meta2d_AMP	meta2d_rAMP	0	0	0	6	6	6	6	12	12	12	12	18	18	18	18	TS
4	479	0.00940748	0.0424091	18	9	4306.81	0.88598	1	20	6.00002	35748	0.0482363	0.171575	19	7.60001	19320.5	13477.9	0.697595	6564	8665	7911	10387	95965	23254	13386	11672	11004	17555	10964	9773	8618	11176	11426	17221.3
16	1732	0.00359818	0.020495	24	0	3407.9	0.101873	0.825762	23.6676	6.63e-05	19309.3	0.00326653	0.0212528	23.8338	3.34e-05	15609.2	3863.69	0.247526	17844	20256	19828	10430	15259	13461	13941	13423	12398	15834	10315	18400	16523	18278	14427	15374.5
25	1786	0.00211966	0.0136402	24	0	1447.09	0.120646	0.854657	21.5666	5.68e-05	14729	0.00237095	0.0162497	22.7833	3e-05	12442.1	2430.97	0.195383	14702	16255	13230	11832	14253	12589	12089	11077	7329	12109	8632	14455	12833	12276	12282	12396.2
26	1809	0.00211966	0.0136402	18	0	17673.8	0.249373	1	23.5328	17.9999	47670.7	0.00451693	0.027398	20.7664	18.3252	38903.6	15749	0.40482	59465	60068	55266	39297	3756	22548	46841	45837	27876	26059	29868	40072	49973	52100	48538	40504.3
28	1840	0.0473038	0.140412	18	9	9326.38	0.269829	1	20	6.00001	77869.2	0.0684291	0.227109	19	7.6	69357.7	9676.79	0.13952	65560	55916	57826	69903	83401	78660	79513	73558	61855	82639	60265	69492	60434	62981	55755	67850.5
31	1973	0.00359818	0.020495	18	0	9579.53	0.227319	1	20	17.9999	42452.9	0.00663242	0.0367837	19	18.05	34269.8	10154.6	0.296315	46273	52362	39003	31478	11187	20613	39709	36044	36823	31826	24561	43217	41069	44093	41433	35979.4
32	1981	0.00359818	0.020495	18	9	1868.53	0.175503	0.986093	20	5.99999	9846.75	0.00528395	0.030682	19	7.6	4853.81	3870.82	0.797481	1911	1719	1280	6568	17864	6922	8033	2342	1740	3546	2668	2489	1874	1743	3065	4250.93
34	2017	0.00359818	0.020495	18	0	48079.4	0.349992	1	20	17.9999	225695	0.00966812	0.0482262	19	18.05	182804	57976	0.317148	286498	246733	225170	178403	7665	154848	179074	204183	131269	202857	168994	264707	207492	228843	201739	192565
38	2031	8.88e-07	4.68e-05	18	9	5745.6	0.208763	1	20	6	32277.5	3.06e-06	0.000143261	19	7.6	12522.7	14912.5	1.19083	980	1227	1210	26967	7193	30282	64668	2532	2738	3754	4008	2041	1366	1589	2447	10200.1
46	2197	0.0473038	0.140412	18	15	3466.94	0.313262	1	20	12	21057.8	0.0772322	0.250411	19	13.6167	19025.5	4739.48	0.249111	22113	21398	21750	14088	4636	17218	17790	23374	19299	22559	18999	21765	20049	20494	20102	19042.3
48	2394	0.0473038	0.140412	24	0	17934.3	0.745005	1	22.8809	6.63e-05	114348	0.153143	0.446712	23.4404	3.4e-05	92788.3	27052.5	0.291551	126635	114629	101780	112289	4228	88735	116081	89797	56432	82506	60834	113397	98055	112655	95114	91544.5
52	2472	0.022073	0.0809025	24	9	584.07	0.617527	1	20	5.99999	4882	0.0721804	0.235845	22	7.42499	2903.57	1469.56	0.506121	1387	2408	2187	4170	10074	3030	2254	2271	2653	1739	2834	1857	1462	1950	2072	2823.2
55	2652	0.00940748	0.0424091	24	3	1263.07	0.0982222	0.807944	20.806	6.44e-05	14662.3	0.00737997	0.0395488	22.403	1.40022	12671.7	2976.55	0.234896	14019	16472	13496	12505	12638	12625	14110	11185	7458	10615	10788	14992	12473	13689	12147	12614.1
56	2659	0.022073	0.0809025	18	9	7820.25	0.196971	1	20	6	40371.5	0.0279913	0.110866	19	7.6	16362.9	17598	1.07548	4143	2810	2937	31395	82366	21543	26182	6558	2665	5169	3313	3892	2965	4657	3736	13622.1
57	2661	0.0326491	0.108787	18	6	6234.21	0.662753	1	20	5.99999	25651.8	0.104584	0.326535	19	6.01666	13345.5	13348.3	1.00021	7071	6277	2011	21418	57713	13737	9739	5691	2887	15819	5758	10139	6049	7995	7427	11982.1
60	2806	0.00590343	0.0294473	24	21	3851.96	0.276114	1	20	18	22727	0.0120934	0.0569537	22	19.525	19205.6	4557.77	0.237315	21755	25611	22379	14549	4673	17786	19065	18826	19707	21628	14465	24996	20087	22842	22983	19423.5
61	2813	0.0145863	0.0602758	24	9	1821.51	0.345948	1	20	6	30197.5	0.0317356	0.12216	22	7.425	10649	12833	1.20509	3096	1941	2789	19224	68054	27343	6169	3644	1257	3362	3102	2463	1639	3545	1580	9947.2
67	3232	0.00359818	0.020495	18	9	4415.53	0.79435	1	20	6	101054	0.0196004	0.08345	19	7.6	36504.1	47073.4	1.28954	1886	1899	1958	31405	314955	28433	29425	6501	4880	651	4640	2881	2741	3559	1773	29172.5
68	3247	0.0326491	0.108787	18	6	1257.59	0.0432984	0.670731	20	6	2253	0.0106895	0.052088	19	6.01667	1001.8	1300.76	1.29843	480	220	310	2170	2802	1946	2094	339	184	258	254	204	369	1149	255	868.933
69	3248	8.88e-07	4.68e-05	18	9	7563.57	0.810373	1	20	6	99204.8	1.09e-05	0.000316799	19	7.6	35200.1	46518.6	1.32155	1263	1031	1372	33417	314955	23822	24625	2992	3024	3420	2435	1847	1709	1611	1800	27954.9
70	3294	8.88e-07	4.68e-05	18	9	5286.33	0.0510372	0.670731	20	6	15708.8	8.12e-07	8.42e-05	19	7.6	6105.83	7327.82	1.20013	550	534	294	16848	6696	18524	20767	2161	2071	1401	1185	1015	709	776	937	4964.53
81	4721	0.000339216	0.00314241	18	9	1269.96	0.449173	1	20	6	8080.5	0.00149155	0.0112266	19	7.6	3300.96	3559.75	1.0784	560	642	488	5195	19561	3733	3833	1080	879	962	990	734	537	1155	849	2746.53
82	4723	0.00120413	0.0086759	18	9	1384.16	0.455217	1	20	5.99999	8339.5	0.00466411	0.0276891	19	7.59999	4129.19	3261.63	0.789895	1049	1294	1158	5237	17898	5952	4271	2163	1974	2379	1932	2837	1612	2707	1855	3621.2
84	4793	1.15e-05	0.000278046	18	9	4209.05	0.0929953	0.799949	20	5.99998	13856	1.58e-05	0.000430443	19	7.59999	6226.64	6132.8	0.984929	1422	1227	1284	20945	7208	9093	18178	3914	3797	2040	2807	1698	1378	1558	2523	5271.47
87	4819	0.000654457	0.00551707	24	9	7391.74	0.0754763	0.737482	20	6.00002	26975.2	0.000539189	0.00499739	22	7.42501	10694	12540.9	1.1727	4656	2747	1366	35917	11528	28255	32201	3603	3536	19303	1607	1699	1217	1131	1357	10008.2
97	8270	0.00475081	0.0265227	18	9	848.882	0.303833	1	20	6	5501.75	0.0108847	0.052433	19	7.6	2433.64	2332.25	0.958335	593	594	649	9271	1217	2574	8945	641	1784	704	890	760	649	786	999	2070.4
98	8598	8.88e-07	4.68e-05	18	9	9551.24	0.0319019	0.670731	20	6	26372.2	5.21e-07	7.32e-05	19	7.6	10561.5	11903.7	1.12708	1521	1441	1585	31724	15960	28717	29088	2706	3836	3502	2407	2165	1704	2057	2200	8707.53
102	14702	0.00359818	0.020495	24	9	822.365	0.248103	1	20	6	11189	0.00716072	0.0386954	22	7.425	4848.91	4289.44	0.884619	2444	1965	2200	19299	6366	16079	3012	3424	2567	2114	1976	2087	1612	1882	2188	4614.33
103	14709	3.55e-06	0.000119774	18	9	2458.96	0.0213641	0.670731	20	6	17032.8	1.32e-06	8.9e-05	19	7.6	6470.56	8029.35	1.24091	405	420	434	20028	14360	16482	17261	1861	2525	1372	770	781	485	600	516	5220
104	14730	8.88e-07	4.68e-05	18	9	11445.9	0.0271213	0.670731	20	6	35954.5	4.47e-07	7.32e-05	19	7.6	13302.2	16789.3	1.26215	663	987	757	42774	39782	37587	23675	2596	2461	2621	1581	1505	1181	1038	1101	10687.3
105	14746	0.000339216	0.00314241	18	9	998.435	0.0215189	0.670731	20	6	6826	9.36e-05	0.00132976	19	7.6	2572.54	3144.41	1.2223	188	304	283	7085	8121	6089	6009	762	577	388	299	331	204	309	293	2082.8
108	16645	0.00166189	0.0118727	24	12	131.168	0.0957029	0.806342	22.3848	12	565.75	0.00155013	0.0115642	23.1924	12.0146	423.132	173.603	0.41028	253	294	321	449	445	401	586	412	712	553	586	343	329	316	448	429.867
110	16707	0.000339216	0.00314241	18	9	2893.13	0.145698	0.921265	20	5.99998	11884	0.000539458	0.00499739	19	7.59999	5135.36	5522.35	1.07536	826	770	510	16340	1010	15800	14386	2955	2726	2652	1871	989	995	1228	1071	4275.27
112	16788	1.15e-05	0.000278046	18	9	2472.05	0.0237212	0.670731	20	5.99999	9763	4.41e-06	0.000195741	19	7.6	4052.38	4485.33	1.10684	569	515	703	11735	8418	8099	10800	1811	1689	1432	1593	721	821	860	541	3353.8
113	16792	0.000165168	0.00183206	18	9	2517.3	0.139415	0.917215	20	6	15922	0.000268928	0.00298297	19	7.6	6553.67	7128.63	1.08773	1310	1206	798	21957	3303	25040	13388	2383	1825	2977	1794	1983	1226	1135	1326	5443.4
116	17070	1.15e-05	0.000278046	18	9	1689.99	0.0370174	0.670731	20	6	12286	6.69e-06	0.000235142	19	7.6	4611.32	5703.52	1.23685	357	342	325	11482	18109	9436	10117	1348	1059	713	495	712	393	553	404	3723
117	17174	0.000654457	0.00551707	18	9	690.843	0.0637783	0.670865	20	6	3014.5	0.00046265	0.00448292	19	7.6	2249.82	773.175	0.343661	1060	1619	1791	3329	2758	3154	2817	2095	2393	1625	2414	1632	1516	1898	1840	2129.4
118	17222	0.00590343	0.0294473	24	9	428.153	0.349573	1	20	6	4067.5	0.014824	0.0677132	22	7.425	2226.66	1277.39	0.573682	1452	1182	1714	1849	2123	7079	5219	1788	911	1732	1976	1356	1156	1127	1688	2156.8
119	17297	0.00120413	0.0086759	18	9	1158.95	0.0541824	0.670731	20	6.00001	3393.25	0.000694011	0.00609429	19	7.60001	1765.25	1357.62	0.769084	612	624	625	4260	3433	3955	1925	1016	1095	1078	1454	589	611	1089	941	1553.8
120	17298	0.00590343	0.0294473	24	9	630.739	0.0958492	0.806342	20	6	6249.75	0.00479673	0.0282772	22	7.425	2304.11	2648.57	1.1495	250	1499	579	8332	1229	8589	6849	929	796	1024	659	310	318	683	343	2159.27
121	17382	0.022073	0.0809025	18	6	4335.8	0.106704	0.828354	20	6	11002.5	0.0166073	0.0740737	19	6.01667	5507.94	5676.4	1.03059	2209	2635	3254	9487	18072	7679	8772	3548	1509	2656	1829	3471	2543	3076	3182	4928.13
122	17456	8.88e-07	4.68e-05	18	9	64825.1	0.0219881	0.670731	20	6	312810	3.66e-07	7.32e-05	19	7.6	113250	148839	1.31425	2326	1564	1749	352711	243412	332540	322579	20872	15767	15775	18350	3646	4750	7215	7775	90068.7
126	17682	0.022073	0.0809025	18	9	765.797	0.125953	0.870317	20	6	4788.25	0.0191422	0.0823302	19	7.6	1756.19	2197.09	1.25105	164	205	112	3861	9298	3156	2838	325	145	238	181	260	99	194	134	1414
127	17703	0.00211966	0.0136402	24	9	1118.29	0.0544635	0.670731	20	6	14655.8	0.00116214	0.00915594	22	7.425	5876.55	5862.77	0.997655	2444	1965	2200	19299	6366	16079	16879	3424	2567	2114	1976	2087	1869	1882	2188	5555.93
128	18256	8.88e-07	4.68e-05	18	9	2309.41	0.0191951	0.670731	20	6	38335	3.22e-07	7.32e-05	19	7.6	14237.4	17992.4	1.26374	663	987	757	41182	38301	38098	35759	3386	3526	2462	1581	1505	1181	1038	1101	11435.1
133	18489	0.000654457	0.00551707	18	9	1405.02	0.110686	0.828354	20	6	5563.5	0.000762985	0.00663089	19	7.6	2140.29	2608.2	1.21862	230	213	119	7499	3485	2153	9117	1037	767	223	316	154	159	256	283	1734.07
135	18588	0.0145863	0.0602758	18	9	15862.9	0.807835	1	23.0084	6	40589.5	0.0641139	0.216856	20.5042	7.79953	31539.9	12104.3	0.383778	14639	19694	16865	52986	1496	52104	55772	45365	30018	40713	24688	33200	21903	23603	19900	30196.4
136	18619	0.000339216	0.00314241	18	9	11252.9	0.294499	1	20	6	59191.8	0.0010201	0.0081127	19	7.6	21985.3	27646.5	1.2575	1298	1616	2092	20034	126012	73350	17371	2722	3513	6445	3893	1705	1516	1601	2023	17679.4
137	20281	0.00120413	0.0086759	18	6	1997.22	0.446839	1	20	6	6393.25	0.00458827	0.027432	19	6.01667	4639.7	1991.67	0.429268	2986	3265	3291	5784	7846	5517	6426	3196	2281	4212	2666	4154	3866	4908	6146	4436.27
138	20290	0.0326491	0.108787	24	12	471.994	0.261502	1	20	12	3252.5	0.0492055	0.172834	22	12.1	2302.46	984.834	0.427731	1424	2058	1957	1691	2231	2231	2329	2614	4489	2337	3570	2515	2263	1314	1521	2302.93
142	22969	0.00359818	0.020495	18	9	3598.47	0.577947	1	20	6.00002	10178.8	0.0149221	0.0677132	19	7.60001	5786.4	3341.29	0.577439	1263	1523	1579	12610	5527	10472	12106	2864	2782	2536	4302	8904	1755	9171	1596	5266
143	31222	0.000339216	0.00314241	18	9	186922	0.150067	0.930196	20	6	774414	0.000554131	0.00505562	19	7.6	339183	332175	0.97934	78479	96947	65419	408827	1446093	673175	569563	163639	94411	151127	145719	101713	66295	117427	132867	287447
149	32158	7.55e-05	0.00109706	18	9	953.533	0.0544002	0.670731	20	6.00001	2505.25	5.5e-05	0.000875362	19	7.60001	1173.33	1099.61	0.93717	163	168	196	2955	1514	2491	3061	570	652	533	791	301	868	355	413	1002.07
157	34097	0.0326491	0.108787	24	21	5279.61	0.186349	0.995191	22.8809	17.9999	18616.2	0.0371258	0.137873	23.4404	19.4753	14004.6	5724.95	0.408791	19493	17202	15940	8834	1310	12072	14331	10557	8428	10480	16423	19266	13580	18847	22772	13969
169	46362	0.0473038	0.140412	18	9	108.718	0.674034	1	20	6.00001	1395	0.141746	0.418115	19	7.6	1289.13	135.639	0.105218	1092	981	1367	1425	1251	1431	1473	1142	1233	1424	1446	1072	1078	1201	1404	1268
184	64557	0.0473038	0.140412	18	0	4351	0.487457	1	22.1448	17.9999	23362.5	0.109983	0.340398	20.0724	18.1939	19477.3	5071.66	0.260389	24374	23433	26924	21112	2806	17199	20627	16678	15001	22283	18049	21883	19962	26023	25582	20129.1
186	64569	0.022073	0.0809025	18	0	2390.37	0.57441	1	20	17.9999	17589.2	0.0680583	0.227109	19	18.05	15619	3085.99	0.19758	20991	17175	20259	13596	598	15227	14414	19499	15148	17864	16950	20075	18895	14684	16703	16138.5
191	64632	0.0326491	0.108787	18	6	172.181	0.436743	1	20	5.99999	755.25	0.0748662	0.243676	19	6.01666	594.365	178.492	0.300307	560	470	393	683	702	742	894	371	589	677	376	648	601	421	515	576.133
203	66287	0.00940748	0.0424091	18	0	4203.75	0.456479	1	20	17.9999	17524	0.0277004	0.110866	19	18.05	14890.4	3891.13	0.261319	20972	20271	18247	13704	3563	10368	16833	18088	12875	17265	10900	19519	16454	19351	14772	15545.5
205	66350	0.0326491	0.108787	18	0	4141.52	0.591285	1	23.0084	17.9999	16837.2	0.0955091	0.303827	20.5042	18.2725	14471.5	4107.78	0.283853	20879	20227	17370	10227	1937	17342	15792	13806	8513	17118	13403	18026	16340	17215	15768	14930.9
207	66827	0.00120413	0.0086759	18	9	2042.83	0.105219	0.828354	20	6	12280.8	0.00126364	0.00977294	19	7.6	4440.92	5727.51	1.28971	253	268	287	20762	2973	11595	13793	423	855	409	485	192	309	198	431	3548.87
211	84185	0.0473038	0.140412	18	9	280.721	0.919919	1	20	6	4433.75	0.179921	0.503843	19	7.6	1844.95	1893.35	1.02623	442	390	460	1303	14516	1326	590	419	456	698	620	463	421	654	493	1550.07
214	84925	8.88e-07	4.68e-05	18	9	17021.5	0.0219532	0.670731	20	6	94055.2	3.66e-07	7.32e-05	19	7.6	36262.5	43923.2	1.21126	2979	3115	3041	108013	74356	97476	96376	11457	11298	9553	6606	4980	3497	3811	4765	29421.5
216	88847	8.88e-07	4.68e-05	18	9	33191.9	0.0862158	0.778126	20	5.99999	144547	1.33e-06	8.9e-05	19	7.59999	60371.9	66509.6	1.10166	8157	9377	6778	196123	37432	165065	179568	29303	27722	23764	18916	14634	10828	9454	13076	50013.1
218	88910	0.0473038	0.140412	24	18	159.453	0.282161	1	26.2222	17.9999	1390.25	0.0709601	0.23367	25.1111	18.0353	1241.13	93.9475	0.0756951	1277	1074	1061	1073	1162	966	1202	1447	1319	1178	1267	1135	1463	1368	1595	1239.13
220	92727	0.0473038	0.140412	18	9	205.591	0.954764	1	20	6.00001	3047	0.185057	0.511397	19	7.6	1704.96	1073.27	0.629501	850	785	868	1142	8771	1238	1037	1113	956	1324	1206	766	847	992	1172	1537.8
223	95440	0.00359818	0.020495	24	9	1336.08	0.1117	0.828354	20	5.99999	8715.25	0.00354462	0.0226372	22	7.425	4865.9	2773.88	0.570065	3482	2825	3254	12852	7138	4813	10058	4347	3887	2465	4170	3631	2230	2893	2668	4714.2
224	96537	0.022073	0.0809025	18	0	3259.59	0.384464	1	20	17.9999	17289	0.04896	0.172834	19	18.05	14569.5	3454.2	0.237085	20516	17998	17015	16151	4602	8510	14661	16314	12691	11977	17674	18861	16120	17114	17061	15151
225	97450	3.11e-05	0.000582233	18	9	5487.5	0.0375578	0.670731	20	6	15232.8	1.71e-05	0.000437173	19	7.6	5949.4	7075.95	1.18936	615	530	721	20248	8333	16913	15437	1497	1914	1970	1529	928	601	701	773	4847.33
226	98053	0.0326491	0.108787	18	0	1108.39	0.0833098	0.763371	20	17.9999	7688.75	0.0187873	0.081219	19	18.05	6185.37	1698.12	0.274538	8637	7044	7780	4073	445	5262	3713	7774	7070	7243	7273	8812	7674	7419	6850	6471.27
228	100114	0.0145863	0.0602758	18	9	337.997	0.49769	1	20	6	4252	0.0430156	0.156749	19	7.6	1664.37	1968.79	1.1829	180	163	153	551	7795	8279	383	236	137	1254	277	303	250	175	230	1357.73
230	100343	0.00120413	0.0086759	18	9	184.378	0.0632365	0.670865	20	6	784.5	0.000798218	0.00677887	19	7.6	496.149	256.071	0.516116	207	375	226	1018	657	633	830	412	353	506	364	355	246	301	361	456.267
232	102246	0.0326491	0.108787	18	9	20843.7	0.75057	1	20	6	137958	0.115393	0.351177	19	7.6	91433.9	40573.9	0.443751	31716	57590	62960	73329	274583	96520	107398	75762	49330	84577	88355	60091	59435	76283	78790	85114.6
235	102727	0.00590343	0.0294473	24	6	1427.47	0.0217277	0.670731	20	6	7007	0.00127773	0.00978385	22	6.05	2348.07	4305.97	1.83383	2015	227	102	8418	7628	6791	5191	247	209	211	0	109	204	80	189	2108.07
236	102963	0.00211966	0.0136402	18	6	384.313	0.710721	1	20	6	2688.25	0.0112956	0.0538692	19	6.01666	2078.44	617.182	0.296945	1862	1639	1905	1961	4254	2129	2409	1637	920	1861	1421	2552	2037	1867	1777	2015.4
238	103870	0.0145863	0.0602758	24	18	1423.76	0.279663	1	26.0568	18	13342.2	0.0265227	0.108013	25.0284	18.0304	9797.1	3100.09	0.316429	8446	9606	8979	9672	1388	8313	8016	10919	7924	9534	9867	10768	10279	14576	17746	9735.53
242	105081	0.0473038	0.140412	18	9	1252.99	0.0255548	0.670731	20	6	5405.75	0.00932995	0.0473804	19	7.6	2326.37	2247.88	0.96626	518	744	708	5743	4161	5279	6440	1124	868	485	646	857	592	776	703	1976.27
243	105085	0.00120413	0.0086759	24	9	934.088	0.0255542	0.670731	20	6	12760.5	0.000350444	0.00351696	22	7.425	4387.33	5583.09	1.27255	526	1027	1193	14663	8429	13362	14588	1000	1549	1297	876	714	923	483	600	4082
245	105370	0.00120413	0.0086759	18	9	2871.91	0.195098	1	20	6	6987.75	0.002198	0.0154459	19	7.6	3492.28	3310.11	0.947837	462	599	346	10936	787	8457	7771	3045	1924	3236	2627	1133	962	1450	916	2976.73
247	105630	0.000165168	0.00183206	24	9	2169.76	0.184657	0.995191	20	5.99999	15661.5	0.000347627	0.00351696	22	7.425	6285.5	6646.8	1.05748	2032	1591	2280	9712	9439	31032	12463	3491	3119	3252	3104	2326	1702	1706	1581	5922
248	105769	3.55e-06	0.000119774	18	9	1931.82	0.163706	0.971476	20	5.99999	8915.25	8.93e-06	0.000278822	19	7.6	3548.84	4150.12	1.16943	332	415	405	13501	2487	14539	5134	1291	1461	1355	637	497	411	547	525	2902.47
249	105863	0.000165168	0.00183206	18	9	479.065	0.096608	0.806342	20	5.99999	2457.25	0.000192207	0.0023828	19	7.6	1040.04	1085.77	1.04397	156	198	166	2744	638	3294	3153	437	324	456	328	366	192	345	267	870.933
251	106385	0.00120413	0.0086759	18	9	1023.18	0.19729	1	20	6.00002	4938.5	0.00222004	0.0154459	19	7.60001	2772.69	1806.47	0.651522	1618	1201	1293	2652	3719	8692	4691	2786	1547	2150	1569	1365	1274	1436	1377	2491.33
252	106387	0.00590343	0.0294473	24	6	10503.7	0.105271	0.828354	20	6	100253	0.00520997	0.0305	22	6.05	36970.1	60584.2	1.63873	22690	445	18569	143058	12171	123315	122468	15802	7841	12129	10644	4260	2332	3734	4442	33593.3
257	109386	0.00590343	0.0294473	18	9	705.693	0.358092	1	22.6301	6	2132	0.0151343	0.0682258	20.3151	7.77187	1528.23	813.042	0.532016	453	692	801	2500	1629	2747	1652	819	3389	1746	1206	871	753	790	1441	1432.6
258	109997	0.00590343	0.0294473	18	9	8501.01	0.414568	1	20	5.99998	44062.8	0.0171628	0.0761487	19	7.59999	23977.5	16327.4	0.680948	10123	12408	10364	31938	91140	28925	24248	9385	22326	18766	14144	11152	14591	7960	14048	21434.5
261	110014	7.55e-05	0.00109706	18	9	3031.01	0.0299162	0.670731	20	5.99998	9636.25	3.16e-05	0.000650042	19	7.59999	4534.53	4148.14	0.914789	1232	1136	1574	11732	6889	8555	11369	2987	2420	2052	2861	1583	1060	1281	1596	3888.47
274	110413	0.000165168	0.00183206	18	9	7915	0.588353	1	20	6.00001	48860	0.000994994	0.00806519	19	7.60001	27818.8	17684.3	0.635696	9711	13231	14967	40494	105898	22693	26355	17937	16264	22036	24230	15330	12610	16848	17364	25064.5
275	110425	0.0473038	0.140412	18	6	2192.74	0.813659	1	20	6.00002	8056.75	0.163863	0.465106	19	6.01668	6102.27	2350.29	0.38515	4717	5548	1978	8641	8600	7826	7160	5045	4213	4879	4994	7977	2410	6379	7566	5862.2
276	110501	0.000339216	0.00314241	18	9	2550.53	0.0802506	0.760126	20	6	8718.5	0.000313369	0.00334392	19	7.6	5228.59	3133.62	0.599324	2222	2316	2831	12456	6499	7644	8275	4047	2900	4071	5876	3270	2097	2973	3631	4740.53
281	111732	0.00359818	0.020495	18	6	13855.8	0.693282	1	20	6.00001	68511.2	0.017446	0.0765989	19	6.01667	51846.7	17733.3	0.342034	41474	45911	37566	51385	105182	59617	57861	30276	49171	48198	19280	50865	53998	48095	51652	50035.4
283	111740	1.15e-05	0.000278046	18	9	1872.77	0.220712	1	20	5.99999	10747.8	3.54e-05	0.000709837	19	7.6	4456.81	4881.42	1.09527	571	560	794	17994	1325	7525	16147	2584	1942	1122	1066	975	809	1003	1031	3696.53
290	117034	0.00285892	0.0182581	18	9	185.969	0.234546	1	20	6	5562	0.00557052	0.0317294	19	7.6	2043.76	2541.03	1.24331	164	168	224	6156	11102	4613	377	272	287	224	202	243	215	231	242	1648
292	117196	3.11e-05	0.000582233	18	9	22175.9	0.149268	0.930196	20	6	195970	6.16e-05	0.000927504	19	7.6	77073.4	90785.9	1.17791	7915	8243	6603	128447	386386	133781	135266	37550	21117	23692	8995	15415	10510	11397	8688	62933.7
293	117199	0.00211966	0.0136402	18	9	5783.43	0.231957	1	20	6	22470	0.00423706	0.0262636	19	7.6	12468.3	8913.56	0.714899	4959	6200	3290	20823	40350	16747	11960	14034	8692	10894	4668	7677	6852	3889	5165	11080
294	117235	7.55e-05	0.00109706	18	9	1607.25	0.145916	0.921265	20	6	4540	0.000136751	0.00182986	19	7.6	2072.78	2249.65	1.08533	139	228	261	7570	835	5607	4148	2026	1409	1296	1107	317	342	266	285	1722.4
296	117535	0.00211966	0.0136402	18	9	3432.65	0.327891	1	20	6	16249.8	0.00574889	0.0323088	19	7.6	6030.24	7425.05	1.2313	406	612	476	10210	37785	10842	6162	819	825	1168	550	939	711	772	830	4873.8
297	117735	0.00940748	0.0424091	18	9	432.042	0.443596	1	23.1373	6	2147.75	0.027038	0.109058	20.5686	7.80911	1792.21	456.437	0.254679	1382	1217	1066	2183	2750	2034	1624	1602	2000	1461	2567	1569	1248	1756	1680	1742.6
306	119023	0.0326491	0.108787	18	9	11432	0.290649	1	20	6	49461.2	0.0536872	0.187018	19	7.6	23901.6	18382.9	0.769104	9439	9641	9453	98172	25770	42295	31608	15298	12639	3789	9794	12311	6008	14184	15177	21038.5
309	119129	7.55e-05	0.00109706	18	9	2016.31	0.255945	1	20	6	9141	0.000229013	0.0027176	19	7.6	4808.01	3854.57	0.801697	1379	1526	1466	11033	2698	6540	16293	4274	3040	3552	3244	1802	1778	2098	2392	4207.67
317	121476	0.00590343	0.0294473	18	9	436.992	0.0583478	0.670731	20	6	3345.5	0.00309096	0.0205172	19	7.6	1451.93	1397.94	0.962816	389	280	497	2985	5259	2691	2447	510	663	531	363	528	523	477	370	1234.2
318	121482	0.000165168	0.00183206	18	9	782.767	0.138924	0.917215	20	6.00001	2276.25	0.000268061	0.00298297	19	7.60001	1208.19	915.94	0.758109	438	464	469	3170	690	2462	2783	652	529	1402	847	523	584	452	518	1065.53
319	122710	0.00940748	0.0424091	24	9	394.742	0.0987168	0.807944	20	6	4913	0.00741246	0.0395488	22	7.425	1823.48	2139.59	1.17336	379	437	542	6512	935	6179	6026	916	1000	722	360	461	251	452	425	1706.47
321	124612	0.0326491	0.108787	18	9	331.633	0.0761103	0.737482	20	6	1439.5	0.0173884	0.0765989	19	7.6	632.44	595.659	0.941843	190	82	201	1384	2301	986	1087	295	246	164	198	189	228	167	377	539.667
325	125788	3.11e-05	0.000582233	18	9	2549.3	0.0712718	0.715264	20	6.00002	8760	3.11e-05	0.000650042	19	7.60001	4252.08	3713.34	0.873299	1186	1352	1198	8680	4777	8144	13439	2202	2277	2955	2782	1919	980	1496	1719	3673.73
326	125882	3.11e-05	0.000582233	18	9	60418.7	0.0262009	0.670731	20	6	201380	1.22e-05	0.000343716	19	7.6	77875.4	94899	1.2186	5959	5508	6594	244292	138694	221586	200948	28444	24688	23338	14476	11665	7753	9654	2826	63095
327	125884	3.55e-06	0.000119774	18	9	1093.54	0.0867662	0.778126	20	5.99999	4936	4.93e-06	0.000197856	19	7.6	2071.63	2220.47	1.07184	437	304	277	6794	1358	5423	6169	897	802	926	593	483	479	555	390	1725.8
328	125885	8.88e-07	4.68e-05	18	9	795.142	0.0585128	0.670731	20	5.99998	2204	9.23e-07	8.42e-05	19	7.59999	970.323	995.985	1.02645	142	197	165	2321	954	2948	2593	547	503	507	348	243	203	287	270	815.2
330	125888	0.0399765	0.132678	18	6	340.118	0.0418249	0.670731	20	6	829.5	0.0123624	0.0578973	19	6.01667	461.978	386.822	0.837317	188	280	289	906	716	699	997	174	335	239	312	282	289	285	346	422.467
331	125897	0.000165168	0.00183206	18	9	29253	0.0184844	0.670731	20	5.99999	291924	4.18e-05	0.0008059	19	7.6	117832	135583	1.15065	15348	16620	14972	294598	309458	292063	271579	56436	45509	42524	27846	25921	928	21742	15182	96715.1
332	125898	0.00211966	0.0136402	18	9	299.283	0.313758	1	20	6	1678.5	0.0055304	0.0317151	19	7.6	700.634	745.006	1.06333	73	148	108	663	3392	522	2137	353	233	193	199	234	210	219	85	584.6
333	125899	1.15e-05	0.000278046	18	9	12880	0.0263465	0.670731	20	6	39231	4.87e-06	0.000197856	19	7.6	15442.7	18137.7	1.17452	2098	1548	1766	46023	26527	39898	44476	5196	5626	4375	3360	1805	2111	1974	2483	12617.7
334	125942	0.000339216	0.00314241	18	9	2018.08	0.0217704	0.670731	20	6	12284.2	9.46e-05	0.00132976	19	7.6	4976.24	5456.04	1.09642	778	810	919	11952	10393	13247	13545	1646	1378	1874	959	1003	765	1310	1318	4126.47
335	125960	7.55e-05	0.00109706	18	9	25526.6	0.049281	0.670731	20	6	79944	5.02e-05	0.000875362	19	7.6	31819.2	36394	1.14378	5504	3774	4478	94236	84667	35020	105853	11075	11406	9319	6395	1545	5608	6348	7035	26150.9
337	127629	0.0145863	0.0602758	18	9	944.695	0.075445	0.737482	20	6	5274	0.00859685	0.0452946	19	7.6	2591.61	1910.01	0.736996	751	670	954	6361	5334	4137	5264	991	783	1232	1125	999	1017	1492	3302	2294.13
338	127711	0.0326491	0.108787	18	6	230.87	0.32733	1	20	6.00001	955.5	0.0591926	0.202911	19	6.01667	634.711	322.86	0.508672	489	632	369	1551	553	829	889	538	339	439	397	409	490	491	611	601.733
340	128049	0.00211966	0.0136402	24	9	2717.76	0.146441	0.921265	20	6	12027	0.00281774	0.0191561	22	7.425	8493.87	3415.91	0.402162	7301	6832	4261	10176	16205	10353	11374	9713	6140	10093	8766	2713	8180	6485	6014	8307.07
349	130638	0.00590343	0.0294473	18	0	16355	0.231866	1	23.3994	17.9999	47096.4	0.0103945	0.0515443	20.6997	18.3115	37876.5	15702.9	0.414583	60923	58174	51684	38681	3756	20916	46653	42174	26649	25437	29264	38660	48781	53629	47316	39513.1
354	131202	0.00359818	0.020495	24	9	810.344	0.0273427	0.670731	20	6	11363.5	0.00100614	0.00807785	22	7.425	3819.82	4989.99	1.30634	794	627	895	9605	15741	9743	10365	1216	405	959	961	982	318	83	510	3546.93
355	131314	0.0145863	0.0602758	18	0	1866.41	0.257284	1	20	17.9999	6858.99	0.0247133	0.101626	19	18.05	5412.44	1774.54	0.327864	7743	7201	7202	5920	2865	3809	1661	3928	5425	5104	7374	9009	7174	5950	5303	5711.2
356	131427	0.000339216	0.00314241	24	9	359.917	0.0337256	0.670731	20	6	2575.25	0.000141612	0.00186529	22	7.425	979.804	1119.15	1.14222	279	307	195	3365	1592	2452	2892	355	509	637	283	196	188	285	244	918.6
360	131511	8.88e-07	4.68e-05	18	9	568.16	0.0238411	0.670731	20	5.99999	2496	3.95e-07	7.32e-05	19	7.6	998.885	1150.26	1.15155	110	130	85	2742	2064	2938	2240	227	347	461	258	168	195	169	162	819.733
365	133612	0.00211966	0.0136402	18	9	107.48	0.412644	1	20	6	665.25	0.00703376	0.0382546	19	7.6	422	209.742	0.497018	177	208	246	906	345	391	1019	405	316	307	290	352	336	262	280	389.333
366	133616	0.00475081	0.0265227	18	9	115.258	0.692756	1	20	5.99998	602.5	0.022105	0.0913459	19	7.59999	296.236	243.785	0.822943	92	80	90	197	308	1495	410	165	84	254	152	163	152	144	88	258.267
371	146231	0.000339216	0.00314241	18	9	3815.9	0.617589	1	20.3951	5.99999	8729.5	0.0019841	0.0141745	19.1975	7.62323	4988.9	4537.79	0.909577	685	947	662	6503	18985	3061	6369	1747	3910	1786	15275	812	874	1725	1213	4303.6
372	146259	0.0473038	0.140412	18	6	527.855	0.784579	1	20	5.99999	2440.25	0.159357	0.460062	19	6.01666	1478.53	1074.93	0.727028	265	1069	876	1892	5089	1166	1614	501	989	1067	1220	1209	1152	1030	1392	1368.73
373	146262	3.11e-05	0.000582233	18	9	848.175	0.130172	0.892155	20	6.00001	2999.5	5.43e-05	0.000875362	19	7.60001	1338.83	1390.03	1.03825	183	192	193	3847	572	4478	3101	762	772	853	566	334	223	338	421	1122.33
379	167348	3.55e-06	0.000119774	18	9	41265.7	0.044284	0.670731	20	6	185047	2.62e-06	0.000129989	19	7.6	117826	62218.7	0.528055	58231	57190	48849	186309	213388	182342	158150	97433	89004	98643	108301	83237	68507	90067	82384	108136
381	170278	0.0473038	0.140412	18	9	281.605	0.200126	1	20	6	982.75	0.0535814	0.187018	19	7.6	598.755	344.713	0.575715	151	392	367	864	520	1326	1221	300	250	788	628	537	374	237	221	545.067
384	170491	0.022073	0.0809025	24	6	768.802	0.0519596	0.670731	20	6	7012.75	0.00891224	0.0463767	22	6.05	4157.86	2698.35	0.648976	3120	3339	2696	7292	7984	4394	8381	2944	3047	3322	2169	2730	2809	2804	3081	4007.47
386	170496	0.00590343	0.0294473	18	9	741.401	0.200715	1	22.2642	6	3100.25	0.00916892	0.0471828	20.1321	7.74573	2424.08	876.351	0.361519	1672	1693	1422	2790	4391	2970	2250	1975	2731	2325	3730	1987	1398	1589	1811	2315.6
406	204696	1.15e-05	0.000278046	18	9	1554.22	0.0287205	0.670731	20	6.00002	8785.5	5.28e-06	0.000202248	19	7.60001	4085.15	3879.89	0.949753	418	1047	990	11137	7791	7868	8346	2021	2346	2101	2658	854	1702	1564	1370	3480.87
411	210259	7.55e-05	0.00109706	18	9	3706.3	0.0229321	0.670731	20	6	27647.2	2.47e-05	0.000561825	19	7.6	11225.4	12329.6	1.09837	1580	1753	2179	32669	22812	27300	27808	4068	3629	3577	2443	2600	1778	2109	3271	9305.07
412	210272	0.022073	0.0809025	18	9	6600.31	0.489174	1	21.9098	6	16788.8	0.0596936	0.203732	19.9549	7.72105	10982	7352.98	0.669549	2208	3157	6121	11011	18180	30863	7101	4013	7478	22303	17665	8533	3285	2346	6181	10029.7
413	210291	0.00120413	0.0086759	18	9	472801	0.0250141	0.670731	20	6	3.26399e+06	0.000343681	0.00351696	19	7.6	1.2472e+06	1.45896e+06	1.16979	209484	194494	147527	3129378	4154488	2558497	3213579	246376	219258	196277	225230	215209	197917	182677	209195	1.01997e+06
414	210297	8.88e-07	4.68e-05	18	9	44641.1	0.0635969	0.670865	20	5.99998	186550	9.99e-07	8.42e-05	19	7.59999	83619.4	84076.9	1.00547	15483	17030	15414	169839	299581	135272	141506	55090	47021	44123	29449	24987	17817	22031	23226	70524.6
416	210405	0.0326491	0.108787	18	6	385.373	0.220407	1	20	6.00001	1262.5	0.0427031	0.156749	19	6.01667	674.141	587.485	0.871457	548	354	403	1309	2164	892	685	444	261	142	248	255	318	382	807	614.133
417	210798	0.0326491	0.108787	18	15	365.574	0.17349	0.986093	20	12	1335	0.034969	0.132192	19	13.6167	1195.44	308.556	0.25811	1393	1181	1569	833	839	943	826	1083	1357	1349	1551	1304	1264	1164	1292	1196.53
421	210885	0.0145863	0.0602758	18	0	1293.3	0.693181	1	22.8809	17.9999	6079.24	0.056562	0.195417	20.4404	18.2603	5139.51	1386.64	0.269801	6909	6379	6840	4556	950	4681	6278	1907	5264	4721	6668	5120	6185	6305	6707	5298
423	210993	3.55e-06	0.000119774	18	9	1378.86	0.0244006	0.670731	20	6	10222.2	1.5e-06	9.01e-05	19	7.6	4123.8	4598.89	1.11521	572	537	737	12726	9108	8698	10357	1438	1131	1203	1257	705	774	891	979	3407.53
426	212396	0.00359818	0.020495	24	18	2497.85	0.176631	0.986093	21.2339	17.9999	17588.5	0.00531385	0.030682	22.617	18.0675	14246.2	3412.9	0.239565	16312	14954	13057	11295	3905	11665	12960	18420	13885	15653	13063	20090	15264	16215	18785	14368.2
428	213019	0.022073	0.0809025	18	9	8937.83	0.0395474	0.670731	20	6	25408.8	0.00702156	0.0382546	19	7.6	10336.4	11104.1	1.07426	827	946	3690	32025	14502	27966	27142	3287	2941	3140	1959	1514	1328	4128	3710	8607
429	215633	0.0145863	0.0602758	18	9	1924.04	0.341062	1	20	6.00002	12490.2	0.0313582	0.121708	19	7.60001	7807.31	3799.59	0.48667	3241	3672	6138	14204	7353	20343	8061	5437	4539	7599	5694	7511	4964	5069	4408	7215.53
431	215656	0.022073	0.0809025	18	0	2400.63	0.205651	1	23.6676	6.63e-05	15363.3	0.029029	0.114353	20.8338	2.92e-05	12933.7	1873.02	0.144817	15935	14297	15858	12137	10007	10885	14691	13508	10273	11916	10903	15209	13960	12759	13779	13074.5
435	215866	0.022073	0.0809025	18	6	7156.27	0.484365	1	20	6.00001	48924	0.0592124	0.202911	19	6.01667	36602.4	11936	0.326098	36078	30488	31594	36199	79003	38328	42166	30885	22873	33749	24167	34264	31514	31600	27841	35383.3
436	218800	0.00211966	0.0136402	24	9	87.5045	0.0812696	0.761225	20	6.00002	511.25	0.00166519	0.0123136	22	7.42501	420.472	98.8354	0.235058	263	377	378	579	516	430	520	446	418	438	451	340	306	369	395	415.067
440	223080	0.00120413	0.0086759	18	9	20406	0.0393203	0.670731	20	6	57700.2	0.000518825	0.00491427	19	7.6	24242.2	25469.5	1.05063	1350	4911	5920	74037	40320	47964	68480	14092	9267	9926	1158	7721	4955	6516	7513	20275.3
444	223098	0.00940748	0.0424091	18	9	4295.67	0.423612	1	20	5.99999	30867	0.0260037	0.106413	19	7.59999	12961.5	14370	1.10867	1701	1908	2175	63946	2108	11388	46026	7469	7885	2845	5226	2858	2531	2263	522	10723.4
445	223120	0.00940748	0.0424091	18	6	464.216	0.221367	1	20	6	2249.5	0.0149403	0.0677132	19	6.01667	895.26	1412.34	1.57757	185	152	153	3955	939	3323	781	167	340	171	134	251	181	353	180	751
447	223134	1.15e-05	0.000278046	18	9	1438.61	0.266099	1	20	5.99998	6015.5	4.21e-05	0.0008059	19	7.59999	2982.79	2457.29	0.823823	795	1016	1120	5278	1867	11520	5397	1554	1521	2448	1566	1405	1042	1199	1273	2600.07
449	223149	0.00359818	0.020495	18	9	7958.84	0.22001	1	20	6	22379	0.00644502	0.0359811	19	7.6	12636.2	9138.03	0.723164	4358	4164	4051	30224	4165	26845	28282	13188	8245	12330	7370	7667	6174	5789	5342	11212.9
451	223248	0.0326491	0.108787	24	9	1500.83	0.0422375	0.670731	20	6	8635.5	0.0104617	0.0515746	22	7.425	5448.84	2203.47	0.404392	4097	4074	3551	7751	7791	9179	9821	4942	2779	4747	4735	5060	4000	4019	3379	5328.33
453	223335	0.00590343	0.0294473	18	9	315.723	0.530894	1	20	6.00002	2104	0.0212035	0.088232	19	7.60001	1155.87	759.34	0.656944	438	464	469	1026	690	3917	2783	652	529	913	847	1282	584	452	518	1037.6
455	223946	0.00590343	0.0294473	18	9	252.437	0.211797	1	20	6	1180.75	0.00960796	0.0482114	19	7.6	849.443	309.321	0.364145	406	604	502	1414	850	1269	1190	861	570	950	602	771	729	778	523	801.267
459	224423	0.0473038	0.140412	24	9	1080.46	0.0264096	0.670731	20	6	5617.75	0.0096009	0.0482114	22	7.425	2715.56	1892.47	0.696899	1750	1563	1686	6270	6618	4762	4821	2042	1043	1337	1875	1434	476	1663	1841	2612.07
462	225754	0.00940748	0.0424091	18	9	7348.25	0.0413826	0.670731	20	6	33011.5	0.0034458	0.0221741	19	7.6	12400.8	14897.2	1.20131	1100	1948	1296	33240	49154	22886	26766	2024	1875	2004	1566	1679	1668	1768	2235	10080.6
468	228306	0.0326491	0.108787	18	6	6512.1	0.707172	1	20	6	42898.5	0.110096	0.340398	19	6.01667	35482.2	7336.34	0.206761	27001	33495	37363	38469	59624	34980	38521	31622	15939	34498	23869	42488	35653	36434	31037	34732.9
487	241618	0.000339216	0.00314241	18	9	14559.7	0.0554128	0.670731	20	6	55547.8	0.000223342	0.0027176	19	7.6	27776.1	21258.9	0.765366	12225	12526	10821	58427	81976	39637	42151	16848	14895	14018	15510	11677	12457	13638	10170	24465.1
489	250811	0.000654457	0.00551707	24	9	80314.2	0.186524	0.995191	20	6	721205	0.00122205	0.00953879	22	7.425	265909	307862	1.15777	78479	96947	65419	268769	1446093	604831	565128	130873	116117	66716	84617	56635	42257	89188	24020	249073
490	320865	0.022073	0.0809025	24	0	10691.5	0.214687	1	21.1253	7.26e-05	74803.6	0.0301007	0.118023	22.5627	3.88e-05	62076.3	15975.1	0.257347	81667	71778	70966	66702	41857	58192	74915	56523	31312	60391	37975	68823	62076	73982	71798	61930.5
495	335967	0.022073	0.0809025	18	6	2438.1	0.0699924	0.710887	20	6	7464.75	0.011545	0.0546767	19	6.01667	4025.71	3507.3	0.871225	2697	1899	2627	10131	4157	7613	7958	3006	1738	1384	2075	2675	1954	2701	2397	3667.47
505	344754	0.022073	0.0809025	18	9	761.908	0.329879	1	20	6	3827.75	0.0431237	0.156749	19	7.6	2978.3	944.488	0.317123	1671	1918	2497	2990	5300	4275	2746	2438	2838	3577	3005	2022	1957	2067	3167	2831.2
510	345580	0.0145863	0.0602758	18	9	3725.75	0.923401	1	20	6	18922.5	0.0714849	0.234482	19	7.6	9830.46	8369.02	0.851335	3445	422	3179	5347	56577	9063	4703	4670	9319	9305	6670	3561	2091	4166	5387	8527
512	346701	0.000654457	0.00551707	18	9	1807.72	0.0886005	0.781214	20	6	14318.5	0.00062365	0.00553407	19	7.6	5288.48	6666.36	1.26054	253	389	485	11214	25982	11144	8934	1238	996	857	452	613	499	373	324	4250.2
535	369124	0.022073	0.0809025	18	9	3177.03	0.0538644	0.670731	20	6.00001	9432.75	0.00919615	0.0471828	19	7.60001	5402.94	3424.35	0.633794	2366	1798	3426	9458	10092	8414	9767	2360	2153	7424	4097	4027	2144	2428	3090	4869.6
537	370158	7.55e-05	0.00109706	18	9	943.104	0.0529117	0.670731	20	6.00001	2460.5	5.36e-05	0.000875362	19	7.60001	1153.45	1075.58	0.932487	163	168	196	2955	1514	2491	2882	570	589	533	791	301	868	355	413	985.933
539	370904	0.0326491	0.108787	18	9	197.46	0.185235	0.995191	20	5.99998	777.25	0.0369402	0.13779	19	7.59999	482.106	254.081	0.527024	324	183	292	1004	282	973	850	428	323	430	355	310	210	336	338	442.533
543	376826	0.000339216	0.00314241	24	9	745.467	0.0372118	0.670731	20	6.00001	2614	0.000155009	0.00201034	22	7.425	1608.83	938.055	0.583065	670	954	1095	2362	2030	3172	2892	1238	1543	1722	1882	986	1008	904	905	1557.53
545	377213	7.55e-05	0.00109706	24	9	2523.31	0.0889638	0.781214	20.7018	6	9553.5	8.67e-05	0.00126012	22.3509	7.42977	6225.85	3242.07	0.520743	4907	3772	4179	10259	13897	6028	8030	5956	6112	7590	6678	3250	3225	3823	3680	6092.4
557	381214	0.000165168	0.00183206	18	9	875.752	0.184915	0.995191	20	6	2626.75	0.00034807	0.00351696	19	7.6	1556.76	1080.13	0.693833	434	555	414	3699	1028	3496	2284	1584	888	1707	1337	698	850	1050	804	1388.53
559	382604	0.0473038	0.140412	18	6	2086.32	0.952687	1	20	5.99999	8105	0.184753	0.511397	19	6.01666	6435.76	2088.88	0.324574	5154	5839	2358	8641	8793	7826	7160	5045	4213	4879	4994	7977	4038	8123	8296	6222.4
561	382616	7.55e-05	0.00109706	18	0	13809.3	0.0584506	0.670731	20	17.9999	55149.5	5.88e-05	0.00090148	19	18.05	44237.3	12637.3	0.285671	57545	59246	55379	31755	17968	34118	33274	55087	36595	52001	41907	58212	53592	53670	55124	46364.9
562	384832	3.11e-05	0.000582233	18	9	777.817	0.0554782	0.670731	20	6	1884.25	2.46e-05	0.000561825	19	7.6	1042.96	826.276	0.792242	268	252	397	2229	932	2049	2327	943	855	909	911	289	378	431	544	914.267
563	384906	0.0473038	0.140412	18	6	3950.61	0.557079	1	20	6	31945.2	0.122173	0.370211	19	6.01667	23913.9	8357.8	0.349496	19183	22374	17326	25107	52427	24639	25608	20771	17219	20914	19999	21003	17502	20399	21432	23060.2
565	385011	0.022073	0.0809025	18	6	13064.7	0.262246	1	20	6	87496.8	0.0356105	0.133421	19	6.01667	68299.7	19468.2	0.285041	62992	57325	58502	75811	121777	68826	83573	67931	52797	56057	52437	65047	58643	56820	56129	66311.1
569	390122	0.0326491	0.108787	18	9	36515.3	0.541332	1	22.0267	6	99512.2	0.0890003	0.285275	20.0133	7.72912	68360.8	40186.5	0.587859	20065	20216	43309	70021	99403	182822	45803	31816	46744	130538	108028	58669	23779	28654	38597	63230.9
572	390140	0.0473038	0.140412	18	9	4401.03	0.958686	1	20	6	126193	0.185632	0.511397	19	7.6	47999.4	57107.6	1.18976	6066	5540	5617	19516	460323	6721	18213	11887	10627	3827	9071	4876	6735	8560	8995	39104.9
573	390179	0.000339216	0.00314241	18	9	2602.86	0.109581	0.828354	20	6	17424	0.000416323	0.00408093	19	7.6	7009.1	7780.67	1.11008	1310	1206	798	21709	3545	26010	18432	2383	1365	2977	1323	1983	1226	1366	1326	5797.27
578	391889	0.0326491	0.108787	18	9	233.168	0.175102	0.986093	20	6	1616.25	0.035241	0.132626	19	7.6	883.24	549.431	0.622064	539	500	386	2162	1032	831	2440	700	669	406	375	348	342	602	633	797.667
579	393358	0.000165168	0.00183206	18	9	527410	0.0244092	0.670731	20	6	3316581	5.41e-05	0.000875362	19	7.6	1.2627e+06	1.48685e+06	1.17751	192620	191142	146121	3151753	4154488	2614037	3346046	244265	216542	193596	222329	213503	192611	180618	207265	1.03113e+06
597	403865	0.00475081	0.0265227	24	9	184.201	0.0415118	0.670731	20	6	1712.5	0.0018797	0.0135727	22	7.425	644.928	716.701	1.11129	281	185	141	2215	876	2042	1717	284	261	281	151	97	163	213	179	605.733
603	416597	0.022073	0.0809025	18	9	764.559	0.0541262	0.670731	20	6	2778.75	0.00923506	0.0471828	19	7.6	1440.57	1007.43	0.699329	438	619	918	2987	1641	2932	3555	895	756	1038	527	946	787	704	512	1283.67
616	425117	0.0473038	0.140412	18	9	233.699	0.75023	1	20	6	1514.75	0.153969	0.446901	19	7.6	1248.99	273.883	0.219283	1003	971	895	1545	702	1972	1840	1170	1147	1339	1172	1313	1027	937	1062	1206.33
617	458481	0.00940748	0.0424091	24	9	1118.29	0.0570338	0.670731	20	6	14129.2	0.00457692	0.027432	22	7.425	5701.44	5602.17	0.98259	2444	1965	2200	19299	6366	14156	16696	3424	2567	2114	1669	2087	1869	1882	2188	5395.07
619	472871	3.55e-06	0.000119774	18	9	22459.5	0.385172	1	20	6.00001	91518	1.98e-05	0.000491933	19	7.60001	49394	35672.2	0.722197	18954	20658	15599	71319	187366	53304	54083	34742	37642	28981	35623	28804	27399	20345	22752	43838.1
623	474221	3.11e-05	0.000582233	18	9	2341.23	0.244431	1	20	6	12517	9.71e-05	0.00134255	19	7.6	8513.51	3874.47	0.455097	4353	5151	5051	13663	19635	7914	8856	7375	7589	7402	8412	6312	4600	6066	6272	7910.07
627	480021	0.00359818	0.020495	24	9	616.597	0.0549419	0.670731	20	6	3606.75	0.00188376	0.0135727	22	7.425	1371.81	1521.62	1.1092	233	252	885	4359	4784	1491	3793	407	443	944	493	495	297	231	222	1288.6
628	480022	0.000165168	0.00183206	18	9	726.906	0.208718	1	20	6	2507.75	0.0003887	0.00385499	19	7.6	1350.09	1088.68	0.806373	304	374	310	4178	2272	2809	772	1236	1143	1335	564	752	469	555	635	1180.53
629	484364	0.00940748	0.0424091	18	9	1061.19	0.197513	1	20	6.00002	3483	0.0135422	0.062383	19	7.60001	1827.95	1402.79	0.767414	88	790	766	4743	735	4238	4216	1161	1098	1172	1419	1105	926	621	1064	1609.47
632	509927	0.0473038	0.140412	24	18	970.504	0.164794	0.971476	28	17.9999	3756.74	0.0456358	0.163706	26	18.1071	2377.52	501.385	0.210885	1471	1866	1104	1116	2895	1278	1812	1769	1720	2715	2629	3866	2780	3586	4795	2360.13
637	513549	0.00120413	0.0086759	18	9	6835.6	0.0639649	0.670865	20	6	28261	0.000806529	0.00677887	19	7.6	10809.1	12911.4	1.19449	961	1359	1134	37480	9439	31032	35093	826	3145	3296	1899	1841	1181	1706	1581	8798.2
639	513601	0.0145863	0.0602758	18	6	7903.33	0.215382	1	20	6	24713.8	0.0212468	0.088232	19	6.01667	10917.4	14070.1	1.28877	4687	4404	4208	19600	49685	13251	16319	4239	2586	3477	3364	4249	3294	4085	4756	9480.27
645	517202	0.00120413	0.0086759	24	0	1530.18	0.107501	0.828354	21.0178	5.3e-05	14662.3	0.00128827	0.00978385	22.5089	2.84e-05	12632.5	2362.58	0.187024	14019	16472	13496	12505	12638	12625	13061	11185	7458	11130	10788	15342	12695	13689	12147	12616.7
652	1-docosanol	0.0145863	0.0602758	24	21	797.263	0.510448	1	23.5328	6.63e-05	1493	0.0439297	0.158939	23.7664	22.281	1279.43	685.371	0.535686	1443	2250	786	518	2216	361	621	781	642	672	706	2060	1170	1791	2652	1244.6
653	1-hexacosanol	0.0473038	0.140412	18	3	70.1803	0.994232	1	20	6	325.25	0.190802	0.517191	19	4.43333	263.599	151.12	0.573295	292	312	135	94	854	165	188	87	106	126	149	379	183	454	382	260.4
654	1-kestose	0.000654457	0.00551707	18	9	3336.13	0.125281	0.870317	20	5.99999	24582	0.000853434	0.0069849	19	7.6	9755.23	11442.2	1.17293	292	1568	1158	34084	2286	30787	31171	3360	4247	2558	2560	1860	1596	584	1486	7973.13
656	2-aminobutyric acid	0.0473038	0.140412	18	9	2672.86	0.965629	1	20	6	75515.5	0.186646	0.512399	19	7.6	29105.9	33951.3	1.16648	2691	4021	3863	7845	277678	4940	11599	4697	7757	3810	6912	3847	5016	6078	6516	23818
659	2-hydroxyglutaric acid	0.000339216	0.00314241	18	9	61554.4	0.135008	0.907467	20	6.00002	246400	0.000503367	0.00482203	19	7.60001	138559	88641.8	0.639743	61955	78461	52198	254261	397012	174246	160082	103525	108797	100097	74421	70587	72120	76848	86680	124753
661	3,6-anhydro-D-galactose	3.55e-06	0.000119774	18	9	7321.38	0.112971	0.828354	20	5.99999	32724.5	6.31e-06	0.000231329	19	7.6	14106.4	14297.9	1.01357	2927	3130	3136	28302	58745	18475	25376	6153	6542	4632	5488	3239	3222	3631	5195	11879.5
662	3'-adenylic acid	0.0473038	0.140412	24	21	36.0624	0.881466	1	20	17.9999	499.75	0.174181	0.491086	22	19.525	472.944	54.1643	0.114526	733	440	441	406	449	399	405	506	453	428	474	534	461	479	525	475.533
664	3-aminoisobutyric acid	0.0473038	0.140412	18	9	660.791	0.507754	1	20	6.00001	3173.25	0.113583	0.34693	19	7.60001	1733.42	1189.23	0.68606	273	540	1174	2150	6332	3060	1151	971	1814	452	1390	741	581	831	1763	1548.2
666	3-phosphoglycerate	0.0326491	0.108787	24	21	10071.1	0.399261	1	22.6301	17.9999	25103.9	0.0696107	0.230125	23.3151	19.4727	15640.6	10421.6	0.666318	14930	27238	20347	10216	594	3595	6038	14186	1559	12661	22556	4488	21364	31862	42702	15622.4
667	4',5-dihydroxy-7-glucosyloxyflavanone	0.00940748	0.0424091	18	6	2448	0.0252698	0.670731	20	6	4623.25	0.0022214	0.0154459	19	6.01667	2164.42	2520.89	1.16469	856	1159	886	5176	4320	4044	4953	1055	561	624	831	937	707	1613	882	1906.93
668	4-aminobutyric acid	0.0473038	0.140412	18	9	1549.27	0.988666	1	23.1373	6	7828.75	0.189997	0.516668	20.5686	7.80911	6874.27	1497.92	0.217902	4435	5428	5698	13966	887	7606	8856	7632	7589	6691	8412	5448	5101	6326	6597	6711.47
669	5-hydroxymethyl-2-furoic acid	0.00211966	0.0136402	18	9	541.997	0.161822	0.971476	20	6	2092	0.00307944	0.0205172	19	7.6	895.647	915.877	1.02259	190	250	137	878	3953	1634	1903	231	229	458	493	222	244	256	217	753
672	aconitic acid	7.55e-05	0.00109706	18	9	81676.8	0.0271777	0.670731	20	6	285963	2.89e-05	0.000625078	19	7.6	102006	136239	1.3356	1325	1261	1457	325684	363192	214571	240404	20089	17397	11298	2798	3546	2864	2932	2987	80787
673	adenine	0.0145863	0.0602758	18	15	5042.02	0.125196	0.870317	20	12	14904.2	0.013341	0.0617938	19	13.6167	12223.8	4885.5	0.399673	14747	12037	15965	7668	7550	6095	7710	12933	13277	17727	15680	11734	10508	15065	14919	12241
683	asparagine	0.00120413	0.0086759	18	0	74962.5	0.198815	1	20	17.9999	466354	0.00223536	0.0154459	19	18.05	397111	92940.3	0.234041	474587	503400	536557	321136	112308	281523	397273	430658	465065	399896	403550	486313	411013	428656	539436	412758
684	aspartic acid	0.00940748	0.0424091	18	0	127816	0.462531	1	20	17.9999	665651	0.0280103	0.110866	19	18.05	590702	133759	0.226441	829615	771631	720929	457655	114613	560353	589487	736711	657610	555561	541554	742676	651461	624822	643646	613222
686	behenic acid	0.0473038	0.140412	24	6	12966.2	0.0633774	0.670865	20	6.00001	39865.8	0.0204158	0.0860525	22	6.05	22241.1	15871.2	0.713599	25799	5233	19745	43957	37184	41210	37112	17354	4892	23755	7327	16297	15678	17217	7587	21356.5
690	beta-gentiobiose	0.022073	0.0809025	18	9	3631.35	0.082392	0.763258	20	5.99999	14288.5	0.0132937	0.0617938	19	7.6	6911.52	5699.28	0.824606	2205	2281	2859	18356	5564	16952	16282	2697	2999	5770	2983	3504	2183	1836	3887	6023.87
695	campesterol	0.00765546	0.0379621	18	9	529.8	0.301477	1	20	6	2173.5	0.0163204	0.0731813	19	7.6	1467.43	596.861	0.40674	749	760	717	2467	2004	1517	2706	1367	882	1002	1297	1297	841	1419	1592	1374.47
698	caprylic acid	0.0326491	0.108787	18	9	2712.64	0.959772	1	20	6.00001	33895.8	0.139851	0.416589	19	7.60001	21328.3	10650.1	0.499342	11581	11971	14051	15732	89388	12490	17973	14085	17588	15351	20923	12221	12495	14236	14959	19669.6
702	citrulline	0.000654457	0.00551707	24	21	54465.4	0.116842	0.834728	21.1253	18	280247	0.000801281	0.00677887	22.5627	19.4835	220783	67845.8	0.307296	257731	277655	262160	187675	39578	136179	229074	214455	218171	183076	211576	264146	268787	287168	300888	222555
704	cryptochlorogenic acid	0.000165168	0.00183206	18	9	204.354	0.0224235	0.670731	20	6	1571.5	5e-05	0.000875362	19	7.6	659.504	696.236	1.0557	94	128	112	1526	1748	1619	1393	323	287	202	139	194	141	208	152	551.067
705	cyano-l-alanine	0.0145863	0.0602758	24	21	2532.33	0.172984	0.986093	22.0267	17.9999	10050	0.0176175	0.0769512	23.0133	19.4714	7869.95	2187.83	0.277998	6812	9808	9817	5554	4539	4741	6376	6041	11339	6884	6241	9683	10331	8242	11944	7890.13
709	cystine	0.00940748	0.0424091	24	21	39257.5	0.104076	0.828354	20	17.9999	149379	0.00776311	0.0411591	22	19.525	111131	40580.6	0.36516	149394	144928	122895	68684	4959	86999	75725	139141	92203	129698	83918	190116	136300	134075	137026	113071
714	erythritol	0.022073	0.0809025	18	9	1270.32	0.226367	1	20	5.99998	5607.25	0.0314736	0.121708	19	7.59999	3203.17	1919.57	0.599272	1363	1506	1813	3597	9494	4277	5061	1051	1868	2601	3172	1396	1480	1913	2971	2904.2
715	erythrose	0.000339216	0.00314241	18	9	228.572	0.942842	1	20	6	5106.5	0.00289371	0.0195152	19	7.6	1995.98	2295.42	1.15002	261	375	302	894	17920	989	623	554	371	502	497	262	318	328	381	1638.47
717	ethanolamine	7.55e-05	0.00109706	18	0	521100	0.0465873	0.670731	20	17.9999	2.58107e+06	4.77e-05	0.000875362	19	18.05	2.07456e+06	610297	0.294182	3063485	2405512	2773811	1321222	1707069	1218059	1702079	2366224	2040145	1854262	1883466	2596923	2454364	2501214	2771788	2.17731e+06
718	fructose	1.15e-05	0.000278046	18	9	17149.5	0.0551869	0.670731	20	5.99999	59794.2	9.73e-06	0.000292818	19	7.59999	30745.9	24772.1	0.805706	8227	8357	9553	57108	82099	41678	58292	14117	17102	29800	20480	19692	10060	12930	13820	26887.7
720	fucose	0.00940748	0.0424091	18	9	198.343	0.29729	1	20	6	927.25	0.0192397	0.0823302	19	7.6	640.774	284.052	0.443296	368	407	423	699	1551	711	748	375	720	672	641	421	270	419	523	596.533
721	fumaric acid	0.0145863	0.0602758	18	9	33826.6	0.783401	1	20	6	255617	0.0625256	0.212537	19	7.6	216094	39460.7	0.182608	174877	153810	177027	191512	348000	255109	227848	189501	201115	205850	227904	171259	179862	180647	264907	209949
722	galactinol	0.022073	0.0809025	18	6	6598.37	0.13525	0.907467	20	5.99999	16449	0.0203425	0.0860525	19	6.01666	8892.45	8213.79	0.923682	3987	4211	3149	23249	10560	17987	14000	4489	3233	8813	3305	8997	3638	4568	6616	8053.47
725	gluconic acid lactone	0.00590343	0.0294473	18	9	2412.65	0.0588779	0.670731	20	6	8977.75	0.0031159	0.0205211	19	7.6	4357.29	3518.24	0.807437	1685	1891	1390	7926	13414	6025	8546	3202	1873	1739	2111	1469	1852	1422	2595	3809.33
726	glucose	3.11e-05	0.000582233	18	9	216111	0.046313	0.670731	20	6	1.09472e+06	2.08e-05	0.000501014	19	7.6	706171	344463	0.48779	375279	367654	325238	1187332	1167327	989365	1034839	609123	524233	524969	626590	524389	435847	588405	507231	652521
733	glycerol	0.00211966	0.0136402	18	9	88680.7	0.323643	1	20	6.00001	491446	0.00568334	0.0321548	19	7.60001	335918	132228	0.393633	174659	251721	242591	470727	778117	331656	385283	312490	196576	316222	300635	277798	262968	305534	122871	315323
734	glycerol-alpha-phosphate	0.0326491	0.108787	18	9	19786.6	0.38912	1	20	6	79068	0.0681695	0.227109	19	7.6	48259.3	26139.6	0.541648	20671	28039	18140	128317	23458	85811	78686	35323	36536	42163	30268	35902	28406	37571	33531	44188.1
735	glycine	0.00359818	0.020495	18	0	128471	0.142418	0.921265	20	17.9999	1.00292e+06	0.00439491	0.0270431	19	18.05	854339	170269	0.199299	1063731	988502	1026434	785168	303671	691249	704550	968853	899720	870934	930567	1042027	912282	896176	1161214	883005
741	histidine	0.0145863	0.0602758	24	21	100762	0.492824	1	20	17.9999	1.16947e+06	0.0426656	0.156749	22	19.525	978054	176799	0.180766	969910	1151804	1082794	958586	15934	655886	1111630	1088690	1060971	896171	1127326	1165010	1118055	1196383	1198427	986505
742	homoserine	0.0326491	0.108787	24	12	1877.19	0.260232	1	21.0178	12	6004.75	0.0490079	0.172834	22.5089	12.0529	3802.83	2418.91	0.636081	1827	2008	2346	2695	750	4394	7694	5631	6285	5188	6915	2221	2927	3586	3163	3842
743	hypoxanthine	0.022073	0.0809025	24	3	1030.96	0.367406	1	24.9547	6.63e-05	3706	0.0471558	0.168442	24.4773	1.52987	2609.98	922.564	0.353476	2163	3812	5143	5191	3649	2276	2023	1552	2928	1083	1149	2274	1568	1756	1620	2545.8
745	inosine	0.022073	0.0809025	18	9	44966	0.330015	1	20	6	395293	0.0431385	0.156749	19	7.6	331587	45660.1	0.137702	301393	279012	271400	413957	447439	371432	348345	353794	226827	321172	271520	316440	305697	319632	319066	324475
747	inulotriose	0.000165168	0.00183206	18	9	385.727	0.116766	0.834728	20	5.99999	2252.75	0.000228658	0.0027176	19	7.6	989.078	979	0.989811	199	190	232	2918	449	2854	2790	483	496	438	273	256	311	322	338	836.6
748	isochlorogenic acid	0.000165168	0.00183206	18	9	583.717	0.0376562	0.670731	20	6	1606	8.08e-05	0.00119468	19	7.6	659.081	714.492	1.08407	135	133	102	1855	1993	866	1710	272	215	238	147	146	125	153	127	547.8
749	isoleucine	0.0473038	0.140412	18	0	415237	1	1	21.4545	5.99999	4.48786e+06	0.191636	0.517784	19.7273	2.75847	4.26229e+06	200082	0.0469423	4573970	4294529	4465845	3356505	8301437	3210962	3082535	4012027	4202279	3853799	4082054	4241218	4359164	3936729	4083474	4.27044e+06
750	isomaltose	0.000165168	0.00183206	18	9	4288.78	0.135636	0.907467	20	5.99999	12116.8	0.000262253	0.00298297	19	7.6	8360.78	4624.86	0.553161	3505	3192	2479	16571	6484	13031	12381	8582	7071	9379	9831	4828	4629	6889	5755	7640.47
751	isoribose	3.11e-05	0.000582233	18	9	1088.94	0.140357	0.917215	20	6.00001	4894.75	5.82e-05	0.00090148	19	7.60001	2313.61	2165.1	0.93581	430	439	573	4028	8849	2928	3774	1053	1139	1553	1742	781	566	633	1158	1976.4
752	isothreonic acid	0.00120413	0.0086759	18	9	559.675	0.0644603	0.670865	20	6	2454.75	0.000812177	0.00677887	19	7.6	1693.08	733.319	0.433127	925	1052	1057	2260	2030	3040	2489	1245	1543	1722	1633	1103	1008	904	1672	1578.87
754	lactose	0.022073	0.0809025	18	9	3337.9	0.0239511	0.670731	20	6	43115.2	0.00451758	0.027398	19	7.6	16370.1	19354.8	1.18233	2026	1548	2708	41749	53975	39371	37366	3383	2998	2023	2481	2025	1887	1935	4859	13355.6
755	lactulose	0.000165168	0.00183206	18	9	3706.3	0.0220954	0.670731	20	6	27647.2	4.93e-05	0.000875362	19	7.6	11214.7	12455.9	1.11068	1580	1753	2179	32669	22812	27300	27808	4068	3629	3577	3264	2600	501	2109	3271	9274.67
756	lauric acid	0.00120413	0.0086759	18	9	20607.6	0.34542	1	20	5.99999	96528.8	0.00365395	0.0229871	19	7.59999	44996.2	40620.7	0.90276	14050	12236	8269	73557	205701	60125	46732	33281	26222	18623	12211	25951	14142	13953	14990	38669.5
760	linoleic acid	0.0119969	0.0537946	18	6	368.403	0.362732	1	20	6	1931.75	0.0280125	0.110866	19	6.01667	932.604	1057.38	1.13379	308	300	427	1455	3957	1579	736	508	366	396	337	490	416	586	508	824.6
762	lyxitol	0.00940748	0.0424091	18	9	2572.81	0.0511694	0.670731	20	5.99999	7532.5	0.00415854	0.0259678	19	7.59999	3866.61	2905.63	0.751467	1269	1499	1908	5924	10044	5577	8585	1582	1848	2592	3290	1355	1259	1690	2789	3414.07
764	malic acid	3.55e-06	0.000119774	18	9	32900.3	0.316824	1	20	6.00001	214776	1.65e-05	0.000435723	19	7.6	165075	48837.6	0.29585	110665	113916	110004	168557	310983	175957	203607	154441	154289	162535	142021	134257	130633	140493	149677	157469
766	malonic acid	0.0473038	0.140412	24	12	49.851	0.80742	1	24.9547	6	284.25	0.1629	0.464232	24.4773	9.06195	224.134	68.4388	0.305348	126	128	135	268	486	176	207	195	293	282	262	206	152	250	267	228.867
767	maltose	8.88e-07	4.68e-05	18	9	831299	0.0430325	0.670731	20	5.99999	2.10121e+06	6.91e-07	8.32e-05	19	7.6	806443	1.00443e+06	1.2455	23867	21897	24691	2513656	987481	2608659	2295059	270029	199340	264885	205745	61283	73039	99178	101258	650004
768	maltotriose	8.88e-07	4.68e-05	18	9	1800.65	0.144723	0.921265	20	6	21607.8	2.17e-06	0.000114209	19	7.6	7856.02	10079.2	1.28299	314	402	405	37043	2234	21766	25388	1122	1106	1042	803	637	608	714	709	6286.2
769	mannose	0.00120413	0.0086759	18	9	105704	0.020301	0.670731	20	6	753804	0.000284029	0.00310956	19	7.6	317277	319021	1.0055	76112	88682	87831	790416	766336	642767	815698	123472	76588	98192	102346	71784	91961	89708	91956	267590
771	methanolphosphate	7.55e-05	0.00109706	18	9	80476.2	0.734119	1	20	6.00002	618446	0.000598483	0.00536724	19	7.60001	381378	202748	0.531619	192357	216099	215365	302745	1371726	394925	404386	237712	282948	323504	356243	251315	216224	252085	229366	349800
772	methionine	0.00590343	0.0294473	18	0	91973	0.92427	1	23.3994	17.9999	822998	0.0338893	0.12927	20.6997	18.3115	790289	75396.9	0.0954042	882480	887794	901460	594086	1025422	654921	641321	756461	770612	784808	780858	833745	836757	810122	811371	798148
774	methyl O-D-galactopyranoside	0.022073	0.0809025	18	6	4593.37	0.0683548	0.702721	20	5.99999	9432.75	0.0113106	0.0538692	19	6.01666	5403.95	4300	0.795715	3182	2788	2814	9458	10092	8414	9767	2401	2232	7424	2421	4656	1890	3842	3090	4964.73
776	montanic acid	7.55e-05	0.00109706	18	9	804.334	0.259725	1	20	6	3419	0.000232108	0.0027176	19	7.6	2370.67	1028.19	0.433713	1387	1261	1550	1981	5293	2769	3633	1982	2723	1783	2218	1566	1794	1601	1617	2210.53
777	myo-inositol	0.00940748	0.0424091	18	9	17293.7	0.594007	1	20	6	80559.8	0.0345743	0.131289	19	7.6	51892.8	25390.2	0.489283	25262	27040	32784	134609	8366	100372	78892	44241	41501	43635	41525	32188	37896	34457	36306	47938.3
778	myristic acid	0.0473038	0.140412	18	6	6840.9	0.665729	1	20	6	34769.2	0.14039	0.416722	19	6.01667	21359.7	14489	0.678333	13649	14939	9077	27369	69876	24579	17253	18494	15300	12900	9802	20279	13927	14954	15798	19879.7
783	N-acetylornithine	0.0473038	0.140412	18	9	470.226	0.973671	1	28	6.63e-05	22100.2	0.187819	0.512399	23	5.75003	6775.23	8624.96	1.27301	62409	1861	2031	4518	4406	4134	3628	4564	2702	2999	3402	2293	2252	2253	2233	7045.67
788	octadecylglycerol	0.0326491	0.108787	18	6	12883.7	0.0265074	0.670731	20	6	22229.8	0.00696877	0.0382546	19	6.01667	9781.62	13111.2	1.34039	2579	3584	1800	24379	23027	20671	20842	4187	3027	3493	2347	3920	2332	5247	5201	8442.4
789	oleamide	0.0473038	0.140412	18	9	1274.21	0.42886	1	20	6.00002	6295.5	0.09936	0.312539	19	7.60001	4778.24	1200.51	0.251244	3705	3582	3512	5325	8771	5535	5551	3837	2492	5858	4040	4450	3811	4151	4249	4591.27
790	oleic acid	0.00590343	0.0294473	18	6	1659.58	0.238591	1	20	6	4726.5	0.0106557	0.052088	19	6.01667	2132.95	2656.57	1.24549	956	699	976	3359	9405	3782	2360	522	661	1285	59	944	807	1091	1018	1861.6
793	palmitoleic acid	0.000165168	0.00183206	18	6	2149.25	0.162866	0.971476	20	6	6409.25	0.000309983	0.00334392	19	6.01667	3176.88	3273.32	1.03036	1653	1958	1567	5020	11569	5309	3739	987	1345	1449	1105	1781	1650	1768	1738	2842.53
794	panose	8.88e-07	4.68e-05	18	9	1854.39	0.112823	0.828354	20	6	11674.5	1.71e-06	9.64e-05	19	7.6	4169.98	5493.32	1.31735	118	150	100	19839	2420	11237	13202	510	353	511	381	154	250	219	272	3314.4
798	phosphoenolpyruvate	0.022073	0.0809025	24	18	1038.39	0.188624	1	26.5595	17.9999	4664.49	0.0269853	0.109058	25.2797	18.0462	2738.63	1625.29	0.593468	1033	3834	1965	1977	586	1729	755	1783	1952	3235	2987	3118	3357	5053	7130	2699.6
804	psicose	0.000654457	0.00551707	18	9	12323.1	0.07834	0.750462	20	6.00002	34659	0.000557737	0.00505562	19	7.60001	16026.2	15242.1	0.951074	4988	1388	1894	25705	51819	23255	37857	6499	8447	8485	10606	13763	2475	3217	4386	13652.3
805	putrescine	0.0473038	0.140412	24	21	5367.29	0.440448	1	23.1373	17.9999	24831.7	0.101489	0.31805	23.5686	19.479	19592.9	6325.39	0.322841	21468	22335	25984	18821	4892	13623	20327	6178	16695	18598	24627	22516	19848	26300	30663	19525
807	raffinose	0.000165168	0.00183206	18	9	1879.49	0.0916278	0.796312	20	6	10776.8	0.0001831	0.00230378	19	7.6	4282.56	4952.61	1.15646	456	610	503	14519	2290	13882	12416	1767	1528	1280	713	877	293	834	700	3511.2
808	ribitol	0.000165168	0.00183206	18	9	4632.26	0.0500409	0.670731	20	6	13732.8	0.000104996	0.00142761	19	7.6	7729.14	5344.54	0.69148	2193	3282	3184	16059	10044	12087	16741	4812	5976	5617	7153	3449	2829	3856	6169	6896.73
809	ribonic acid	0.00590343	0.0294473	18	9	669.807	0.433025	1	20	5.99999	7037	0.0178155	0.077415	19	7.59999	3649.85	2690.53	0.737163	1691	1793	1134	1961	12638	10799	2750	2168	2543	1803	2473	1559	1648	2059	1443	3230.8
811	saccharopine	1.15e-05	0.000278046	18	9	934.795	0.341555	1	20	6	7703	5.3e-05	0.000875362	19	7.6	3001.42	3558.42	1.18558	198	374	339	6607	1047	17302	5856	733	1014	704	819	592	347	411	365	2447.2
812	sedoheptulose 7-phosphate	0.00590343	0.0294473	24	21	1225.59	0.242901	1	25.5728	17.9999	13301	0.0108225	0.052433	24.7864	19.5673	9939.14	2619.66	0.263571	9335	9948	9185	9798	1388	8775	8016	10342	8256	9662	9182	11348	10488	14750	16618	9806.07
816	sinigrin	0.000165168	0.00183206	18	9	3666	0.170066	0.986093	20	6	9456.5	0.00032247	0.00339803	19	7.6	4625.29	4591.32	0.992655	566	679	808	15045	1154	12265	9362	4526	3162	3829	3111	954	1015	994	1183	3910.2
817	sophorose	0.00359818	0.020495	18	9	485.075	0.311177	1	20	6	1583.75	0.00872753	0.0456976	19	7.6	924.561	612.275	0.662233	348	325	248	1185	761	2667	1722	238	771	879	1063	388	563	656	624	829.2
819	spermidine	0.00940748	0.0424091	18	0	43340.5	0.325355	1	20	17.9999	143921	0.0207798	0.0871512	19	18.05	113491	44041.8	0.388063	200203	127651	180575	99129	8184	67760	134391	132116	68061	114262	105579	137804	125960	160779	151141	120906
821	succinic acid	8.88e-07	4.68e-05	18	9	33595.4	0.559034	1	20	6.00001	177677	7.7e-06	0.000259725	19	7.60001	94784.8	68910.4	0.727019	29135	37791	38174	127580	398545	96494	88089	60750	71486	63433	56681	45405	49010	44239	53970	84052.1
822	sucrose	0.000339216	0.00314241	18	9	1110.16	0.0412388	0.670731	20	5.99999	3097.75	0.000170346	0.00217578	19	7.6	1349.5	1360.97	1.0085	306	365	162	3892	1804	3721	2974	357	718	523	727	431	431	444	208	1137.53
823	tagatose	1.15e-05	0.000278046	18	9	15877.7	0.0454667	0.670731	20	6	58370	8.11e-06	0.000263098	19	7.6	27228.7	27305.9	1.00284	2288	3927	3309	55279	80569	39637	57995	11945	15367	22927	19021	16463	5005	5461	5445	22975.9
826	threitol	3.11e-05	0.000582233	18	9	686.601	0.0572233	0.670731	20	5.99998	4276.75	2.53e-05	0.000561825	19	7.59999	2018.17	1844.21	0.913803	561	474	535	3357	6618	3636	3496	792	1291	1412	1073	754	505	627	833	1730.93
827	threonic acid	0.00590343	0.0294473	18	9	2417.6	0.0623256	0.670865	20	5.99999	8768.75	0.00327742	0.0212528	19	7.59999	4438.89	3398.39	0.765593	1350	1744	1683	12039	6191	8888	7957	2887	475	3078	3628	1970	1785	1603	3366	3909.6
828	threonine	0.00359818	0.020495	18	0	133788	0.114979	0.834728	20	17.9999	743311	0.00363669	0.0229871	19	18.05	644025	146443	0.227387	897028	832511	733482	509375	236809	439764	517081	766059	740406	664011	720424	767901	830638	749889	624816	668680
832	tryptamine	0.0145863	0.0602758	18	9	465.983	0.678878	1	20	5.99998	5719.75	0.0556014	0.192889	19	7.59999	3621.89	1715.73	0.473712	1959	2356	2546	2672	11959	4095	4153	2564	2323	3880	2563	2025	1963	2509	2753	3354.67
833	tryptophan	0.00211966	0.0136402	18	0	57308.9	0.0379608	0.670731	23.5328	17.9999	468853	0.000839055	0.00693454	20.7664	18.3252	425631	72715.3	0.170841	537372	491289	512637	389707	379144	370626	386692	432995	352351	395633	371465	471335	496887	474954	432236	433022
834	tyrosine	0.00120413	0.0086759	18	0	305965	0.160769	0.971476	23.6676	17.9999	3.17985e+06	0.00184871	0.0135518	20.8338	18.3393	3.02639e+06	331319	0.109477	3612817	3318013	3443972	2977545	2374214	2798782	2982999	3121641	2826774	2798161	2913585	3201490	3226371	3081176	3210381	3.05919e+06
837	uric acid	3.55e-06	0.000119774	18	0	13303.9	0.0222773	0.670731	23.6676	17.9999	72156.7	1.37e-06	8.9e-05	20.8338	18.3393	42474.8	56048.2	1.31957	129383	100543	110725	12934	2082	8176	9059	16317	16194	12087	14234	86731	68567	71531	61799	48024.1
839	valine	0.022073	0.0809025	18	0	750905	0.239048	1	20	18	3.80461e+06	0.0329492	0.126255	19	18.05	3.43449e+06	580544	0.169034	4294521	4188328	4021126	2606730	2676077	2081765	3129110	4016248	4268561	2808287	3674207	3626796	4375197	3959113	3257327	3.53223e+06
841	xylitol	0.000654457	0.00551707	24	21	52700.7	0.0327635	0.670731	20	17.9999	183856	0.00025195	0.0029095	22	19.525	134345	54398	0.404914	161855	164723	193961	86047	27385	59373	68576	156039	131601	136867	132323	155099	161792	196123	222410	136945

## Sheet: total TM
ID	CycID	JTK_pvalue	JTK_BH.Q	JTK_period	JTK_adjphase	JTK_amplitude	LS_pvalue	LS_BH.Q	LS_period	LS_adjphase	LS_amplitude	meta2d_pvalue	meta2d_BH.Q	meta2d_period	meta2d_phase	meta2d_Base	meta2d_AMP	meta2d_rAMP	0	0	0	0	6	6	6	6	12	12	12	12	18	18	18	18	TM
38	2031	2.22e-07	1.25e-05	18	9	26380.7	0.0320236	0.211033	20	5.99999	52252.2	1.4e-07	1.08e-05	19	7.59999	21146.4	24599.6	1.1633	1218	1340	2059	2199	40357	39917	52499	76236	5839	8240	7003	9728	4745	2881	2651	4059	16310.7
230	100343	2.22e-07	1.25e-05	18	9	281.075	0.0230064	0.211033	20	6	939	1.03e-07	1.08e-05	19	7.6	539.161	361.363	0.670231	208	213	179	224	981	954	987	834	377	443	368	516	316	325	272	293	468.125
243	105085	2.22e-07	1.25e-05	18	9	3083.69	0.0168779	0.211033	20	5.99999	11279.2	7.64e-08	1.08e-05	19	7.59999	4609.32	5289.95	1.14766	502	553	485	363	12329	10748	12568	9472	1912	2273	1574	1283	793	844	763	649	3569.44
294	117235	2.22e-07	1.25e-05	18	9	1345.62	0.0262227	0.211033	20	6	3387.25	1.16e-07	1.08e-05	19	7.6	1623.48	1668.15	1.02751	161	230	212	221	3980	3555	3898	2116	1899	1361	937	858	336	321	284	360	1295.56
328	125885	2.22e-07	1.25e-05	18	9	716.299	0.0197602	0.211033	20	5.99999	2203.75	8.88e-08	1.08e-05	19	7.59999	976.953	973.612	0.99658	204	245	199	213	1980	2747	1865	2223	532	563	416	304	248	272	301	257	785.562
373	146262	2.22e-07	1.25e-05	18	9	785.949	0.0153559	0.211033	20	5.99998	3231.25	6.99e-08	1.08e-05	19	7.59999	1380.08	1515.37	1.09803	228	181	173	165	3576	3135	3349	2865	707	828	609	499	291	238	230	241	1082.19
379	167348	2.22e-07	1.25e-05	18	9	83145.5	0.0405479	0.221664	20	6.00002	208770	1.76e-07	1.08e-05	19	7.60001	139501	79195.4	0.567705	44935	46945	65621	44064	238007	187665	215283	194125	113647	142898	147922	162085	86070	110112	91313	92235	123933
406	204696	2.22e-07	1.25e-05	18	9	4345.88	0.0302638	0.211033	20	6	10207.2	1.33e-07	1.08e-05	19	7.6	4930.2	4914.77	0.996871	629	649	637	836	14034	10973	6779	9043	3194	3789	3723	4182	1228	1173	1001	1555	3964.06
557	381214	2.22e-07	1.25e-05	18	9	1205.26	0.0438369	0.223696	20	6.00001	3047.75	1.89e-07	1.08e-05	19	7.60001	1743.79	1363.52	0.78193	424	284	419	457	4045	2808	3212	2126	1892	2071	1189	1395	909	950	865	566	1475.75
562	384832	2.22e-07	1.25e-05	18	9	1223.65	0.0212893	0.211033	20	6	2955.25	9.53e-08	1.08e-05	19	7.6	1523.53	1451.85	0.952954	141	191	229	221	3539	2792	3193	2297	1095	1426	1720	1204	452	587	398	325	1238.12
726	glucose	2.22e-07	1.25e-05	18	9	502333	0.0380078	0.221664	20	6.00002	1.31835e+06	1.65e-07	1.08e-05	19	7.60001	885150	487593	0.550859	366937	338307	410330	257219	1371382	1239756	1429553	1232690	749254	843490	988346	973407	480267	718050	671290	558525	789300
767	maltose	2.22e-07	1.25e-05	18	9	377125	0.018208	0.211033	20	5.99998	1.11074e+06	8.22e-08	1.08e-05	19	7.59999	448196	538530	1.20155	16855	15893	17407	19667	1221266	877750	1111755	1232208	278237	202885	106457	145737	37932	64055	71855	57370	342333
777	myo-inositol	2.22e-07	1.25e-05	18	9	22107.5	0.0275705	0.211033	20	6	81008.2	1.22e-07	1.08e-05	19	7.6	49243.9	29000.7	0.58892	21713	22038	22732	18287	86240	80593	76041	81159	37346	49525	36914	37861	34011	33497	30281	28450	43543
804	psicose	2.22e-07	1.25e-05	18	9	17139.2	0.0236933	0.211033	20	6	39078	1.06e-07	1.08e-05	19	7.6	19677.3	18499.6	0.940149	2504	2344	3253	3757	45297	35518	29855	45642	14087	14846	14701	19301	6754	6379	4465	7948	16040.7
823	tagatose	2.22e-07	1.25e-05	18	9	43653.9	0.0501724	0.23669	20	6	88159.8	2.15e-07	1.08e-05	19	7.6	40556.2	42303.4	1.04308	3904	2672	5152	3992	72306	67178	140795	72360	22365	27439	25047	31191	11309	10536	6911	12688	32240.3
103	14709	8.88e-07	2.58e-05	18	9	3492.05	0.0164508	0.211033	20	6	13912.2	2.78e-07	1.08e-05	19	7.6	5385.68	6603.59	1.22614	361	453	374	308	16582	12455	13996	12616	1666	2002	1632	818	525	398	698	517	4087.56
104	14730	8.88e-07	2.58e-05	18	9	6361.13	0.0153928	0.211033	20	5.99999	31601	2.61e-07	1.08e-05	19	7.6	12253.9	15039.8	1.22735	939	982	724	668	34958	33680	29140	28626	4598	4014	3929	1814	1209	1369	1154	954	9297.38
113	16792	8.88e-07	2.58e-05	18	9	2994.6	0.0157986	0.211033	20	5.99999	19662.8	2.68e-07	1.08e-05	19	7.59999	8486.63	8928.74	1.0521	1032	1706	1510	1422	20605	19786	19366	18894	4181	3693	5117	2184	1754	1953	2680	1820	6731.44
116	17070	8.88e-07	2.58e-05	18	9	2085.61	0.0167577	0.211033	20	6	8573	2.83e-07	1.08e-05	19	7.6	3376.21	4006.82	1.18678	421	366	318	296	10183	7543	8905	7661	1270	1336	885	514	461	452	424	382	2588.56
122	17456	8.88e-07	2.58e-05	18	9	16444.1	0.015744	0.211033	20	5.99999	91334.2	2.67e-07	1.08e-05	19	7.59999	36329.1	43890.4	1.20813	1432	3005	1561	1619	90032	87744	85566	101995	18583	16020	9331	8946	2358	3909	5767	5352	27701.2
128	18256	8.88e-07	2.58e-05	18	9	6364.67	0.0156921	0.211033	20	6	31170	2.66e-07	1.08e-05	19	7.6	11833.6	14665.7	1.23932	939	982	724	668	32551	33680	31972	26477	3053	1488	4177	1814	1209	1369	1154	954	8950.69
225	97450	8.88e-07	2.58e-05	18	9	6510.51	0.0230361	0.211033	20	5.99999	15406	3.83e-07	1.34e-05	19	7.6	6339.93	7134.55	1.12534	890	845	712	696	10086	18006	17544	15988	2670	3390	2189	1293	1417	1281	916	1076	4937.44
257	109386	8.88e-07	2.58e-05	18	9	719.658	0.0400074	0.221664	20	6.00002	2047.5	6.45e-07	2.09e-05	19	7.60001	1267.36	823.692	0.649929	376	310	391	440	2061	1847	2036	2246	1204	1033	1232	1327	1199	664	543	778	1105.44
371	146231	8.88e-07	2.58e-05	18	9	2135.82	0.0282168	0.211033	20	6	6574.5	4.64e-07	1.56e-05	19	7.6	3625.66	2731.28	0.753319	1133	805	689	1213	6979	5991	7057	6271	2463	3041	2856	3078	1720	1794	1658	2672	3088.75
539	370904	8.88e-07	2.58e-05	18	9	278.954	0.0422644	0.223696	20	6	824.75	6.79e-07	2.12e-05	19	7.6	507.636	304.009	0.598871	129	234	185	272	957	824	630	888	467	490	341	460	338	276	351	324	447.875
661	3,6-anhydro-D-galactose	8.88e-07	2.58e-05	18	9	4262.79	0.0165292	0.211033	20	6.00002	18185.5	2.79e-07	1.08e-05	19	7.60001	8576.85	7992.24	0.931838	1892	1755	2466	2013	17216	18747	20020	16759	4819	4992	4941	5186	3249	3274	2079	2684	7005.75
811	saccharopine	8.88e-07	2.58e-05	18	9	2408.05	0.151159	0.427609	20	5.99999	8097.75	2.26e-06	4.78e-05	19	7.6	3234.56	3839.76	1.1871	329	231	309	248	16316	6037	6354	3684	743	2337	668	814	577	341	310	378	2479.75
816	sinigrin	8.88e-07	2.58e-05	18	9	2974.09	0.0201161	0.211033	20	6	7977.5	3.37e-07	1.23e-05	19	7.6	3982.7	3821.37	0.959494	662	663	736	825	9675	8240	8004	5991	4117	3715	2781	2312	822	923	861	1377	3231.5
817	sophorose	8.88e-07	2.58e-05	18	9	1150.82	0.0549994	0.245657	20	6	2687.75	8.71e-07	2.3e-05	19	7.6	1395.05	1241.48	0.889921	248	242	328	262	3516	1261	3052	2922	709	1252	1046	1573	358	471	640	536	1151
70	3294	2.89e-06	6.76e-05	18	9	3377.14	0.0150656	0.211033	20	5.99999	16331.8	7.8e-07	2.27e-05	19	7.6	6616.95	7716.8	1.16622	717	704	552	658	16933	16835	17020	14539	3170	3026	2488	1323	682	1223	824	906	5100
214	84925	2.89e-06	6.76e-05	18	9	12289.9	0.0149937	0.211033	20	5.99999	81438	7.77e-07	2.27e-05	19	7.59999	34187	37706.8	1.10296	5044	5634	4313	4216	85760	82556	79666	77770	16621	18525	14138	8248	7362	7923	5832	4787	26774.7
248	105769	2.89e-06	6.76e-05	18	9	3679.08	0.0203722	0.211033	20	5.99999	8911.5	1.04e-06	2.65e-05	19	7.59999	3712.08	4179.41	1.12589	442	557	439	389	10149	9586	6123	9788	1324	2268	1648	1081	508	727	666	553	2890.5
449	223149	2.89e-06	6.76e-05	18	9	7490.38	0.0239114	0.211033	20	6	19006.2	1.21e-06	2.99e-05	19	7.6	10476	8306.88	0.792943	3846	3111	2379	2274	23075	19544	15761	17645	10098	10340	8838	6688	5455	5036	4468	2931	8843.06
578	391889	2.89e-06	6.76e-05	18	9	521.138	0.0796621	0.298914	20	6.00001	1427.5	3.74e-06	6.83e-05	19	7.6	818.861	602.426	0.735687	285	152	276	202	989	1798	1888	1035	689	500	876	810	359	738	318	292	700.438
672	aconitic acid	2.89e-06	6.76e-05	18	9	57654.7	0.0159182	0.211033	20	6	224875	8.22e-07	2.3e-05	19	7.6	84014.1	108630	1.29299	2223	2011	2211	1790	243497	222028	249098	184876	25233	22000	19430	12114	5708	4094	2192	4054	62659.9
704	cryptochlorogenic acid	2.89e-06	6.76e-05	18	9	239.002	0.0169259	0.211033	20	6	1267.25	8.71e-07	2.3e-05	19	7.6	524.18	568.436	1.08443	67	89	71	110	1449	1156	1266	1198	209	204	164	124	118	138	125	111	412.438
67	3232	7.77e-06	0.000128434	18	9	12232.9	0.0445799	0.223696	20	6	26086.2	5.5e-06	8.08e-05	19	7.6	12893.8	12646.1	0.980791	2325	1461	261	1615	36423	19674	24344	23904	8475	12150	17512	3071	3171	5933	3265	2942	10407.9
84	4793	7.77e-06	0.000128434	18	9	5469.47	0.0183348	0.211033	20	6.00001	15718.2	2.39e-06	4.79e-05	19	7.60001	6993.17	7449.88	1.06531	797	683	924	642	15772	16443	17678	12980	4003	4166	4040	3792	2674	2306	728	831	5528.69
105	14746	7.77e-06	0.000128434	18	9	1195.72	0.0176667	0.211033	20	6	4881	2.31e-06	4.78e-05	19	7.6	1971.14	2244.07	1.13847	214	208	295	214	5832	4649	4682	4361	813	768	589	360	364	440	298	393	1530
207	66827	7.77e-06	0.000128434	18	9	1152.94	0.0410279	0.221664	20	6	2400.5	5.09e-06	7.94e-05	19	7.6	1130.67	1191.57	1.05386	167	134	97	112	3265	1810	2345	2182	296	1715	222	1204	174	172	303	145	896.438
245	105370	7.77e-06	0.000128434	18	9	4478.11	0.0301042	0.211033	20	6	9697.75	3.81e-06	6.83e-05	19	7.6	4516.92	4634.85	1.02611	437	405	484	478	11907	7340	11071	8473	1118	4627	3952	2399	1156	1460	1457	929	3605.81
261	110014	7.77e-06	0.000128434	18	9	2848.58	0.0163368	0.211033	20	5.99998	11361.8	2.14e-06	4.78e-05	19	7.59999	5015.77	5218.8	1.04048	832	594	1050	905	13030	11158	10926	10333	2320	3357	2316	2302	1579	888	966	1282	3989.88
290	117034	7.77e-06	0.000128434	18	9	1618.92	0.0178274	0.211033	20	6	5145.5	2.33e-06	4.78e-05	19	7.6	1940.45	2435.5	1.25512	149	108	140	115	5859	5580	5380	3763	569	514	386	235	166	155	148	120	1461.69
411	210259	7.77e-06	0.000128434	18	9	4713.22	0.0177145	0.211033	20	5.99999	22223.5	2.31e-06	4.78e-05	19	7.59999	9603.37	9996.32	1.04092	1332	1885	1396	1656	23953	19931	23190	21820	4326	5265	4734	2250	1859	2063	3910	2643	7638.31
444	223098	7.77e-06	0.000128434	18	9	18083	0.0227089	0.211033	20	5.99998	38915.5	2.92e-06	5.59e-05	19	7.59999	16259.3	18521.5	1.13913	2046	1294	1991	1043	27633	43273	49471	35285	8967	7384	7377	5869	3187	3722	1346	2006	12618.4
512	346701	7.77e-06	0.000128434	18	9	1559.88	0.0148717	0.211033	20	5.99999	8518.5	1.96e-06	4.59e-05	19	7.6	3405.15	3995.99	1.17351	428	443	335	261	8899	9062	8422	7691	1352	1565	1092	580	488	524	432	340	2619.62
553	379597	7.77e-06	0.000128434	18	9	661.852	0.0264744	0.211033	20	6	2885	3.37e-06	6.32e-05	19	7.6	1741.26	972.97	0.558772	734	758	936	1034	3167	2554	3000	2819	1223	1347	1401	1348	1107	1181	855	1336	1550
718	fructose	7.77e-06	0.000128434	18	9	22707.7	0.230562	0.584673	20	6.00002	95784.2	2.55e-05	0.000238822	19	7.60001	44180.7	42366.3	0.958931	10526	6352	9293	6619	109143	51176	184879	37939	16546	30328	27711	20393	10935	20594	17906	13299	35852.4
750	isomaltose	7.77e-06	0.000128434	18	9	8404.32	0.0514042	0.2387	23.6461	6.00001	18596.2	6.28e-06	8.62e-05	20.8231	7.84761	11648	7744.86	0.664908	2837	2310	3453	3077	23200	14661	18699	17825	9261	13302	14784	15467	5600	9776	8433	6607	10580.8
805	putrescine	7.77e-06	0.000128434	24	0	5581.72	0.0117856	0.211033	23.9024	6.63e-05	22790.7	1.58e-06	3.8e-05	23.9512	3.32e-05	17486.4	7292.96	0.417064	23423	20622	22395	24723	13081	15698	15517	14640	10174	11814	11967	14210	20637	21791	19547	19731	17498.1
821	succinic acid	7.77e-06	0.000128434	18	9	24784.6	0.022624	0.211033	20	6	84118.8	2.91e-06	5.59e-05	19	7.6	50009	32236.4	0.644612	13661	23305	22410	20926	89192	87544	79072	80667	34477	49502	40174	45670	30682	31144	20113	30214	43672.1
32	1981	1.91e-05	0.000211771	18	9	2732.61	0.0309355	0.211033	20	5.99998	8193.25	9.06e-06	0.000115738	19	7.59999	4147.65	3290.82	0.793417	1202	1601	1244	1866	8590	7901	5598	10684	2717	2613	2506	2268	1563	1480	2181	1998	3500.75
118	17222	1.91e-05	0.000211771	18	9	3934.52	0.0319756	0.211033	20	6.00002	8790.25	9.35e-06	0.000117379	19	7.60001	4004.5	3849	0.961168	1212	1037	633	606	12288	6840	7366	8667	2099	2423	2171	1371	1364	1431	1682	776	3247.88
249	105863	1.91e-05	0.000211771	18	9	671.751	0.0172838	0.211033	20	5.99999	2295	5.25e-06	8.05e-05	19	7.59999	980.593	1043.96	1.06462	160	206	184	141	2439	2205	2650	1886	480	498	475	240	187	258	234	163	775.375
258	109997	1.91e-05	0.000211771	18	9	6052.3	0.0823985	0.298914	20	6.00001	15191.8	2.26e-05	0.000218931	19	7.60001	9255.05	6339.02	0.684925	3619	2376	2654	3541	14357	18793	7366	20251	8473	11058	9007	7376	4714	6713	3936	3909	8008.94
326	125882	1.91e-05	0.000211771	18	9	30947.6	0.0151138	0.211033	20	5.99999	183541	4.63e-06	7.51e-05	19	7.59999	75071.4	86968.8	1.15848	6007	10337	7233	4711	175214	176971	194559	187420	37270	35268	32413	15833	14160	15160	12565	2483	57975.2
331	125897	1.91e-05	0.000211771	18	9	68998.8	0.119919	0.373032	20	6.00002	244310	3.2e-05	0.000284167	19	7.60001	112782	109725	0.972898	20013	30736	20165	21703	129527	366601	363007	118105	75575	86280	63268	31517	35832	41991	29853	25225	91212.4
356	131427	1.91e-05	0.000211771	18	9	624.552	0.0371524	0.221664	20	5.99998	2226.5	1.08e-05	0.000120244	19	7.59999	1014.47	993.43	0.979257	255	252	196	217	2584	2512	2728	1082	605	681	520	374	285	342	251	223	819.188
408	209676	1.91e-05	0.000211771	18	9	4254.66	0.0660362	0.274912	20	5.99999	11757	1.84e-05	0.000186747	19	7.59999	8457.39	4001.98	0.473194	4156	3367	4809	3292	9117	12465	13724	11722	7583	7118	10364	10487	5030	7614	5773	6110	7670.69
414	210297	1.91e-05	0.000211771	18	9	58705.1	0.0150162	0.211033	20	5.99999	361704	4.61e-06	7.51e-05	19	7.59999	154224	165324	1.07197	27266	32113	21309	22022	374455	372041	361989	338330	77793	85171	65745	39074	35277	39588	30064	25368	121725
428	213019	1.91e-05	0.000211771	18	9	4652.41	0.0148925	0.211033	20	5.99999	24527	4.57e-06	7.51e-05	19	7.6	10045.9	11377.8	1.13258	1077	1075	874	2697	26948	23588	25701	21871	4447	4305	3473	2794	1693	1677	1341	1388	7809.31
495	335967	1.91e-05	0.000211771	24	9	976.514	0.0146727	0.211033	20	5.99999	6668.5	4.51e-06	7.51e-05	22	7.425	3692.46	2195.7	0.594645	2586	2601	2278	2179	7525	5968	7175	6006	2816	2990	2732	2958	2393	1928	2403	1593	3508.19
537	370158	1.91e-05	0.000211771	18	9	670.337	0.0180415	0.211033	20	5.99998	2897.5	5.47e-06	8.08e-05	19	7.59999	1379.84	1237.9	0.897133	332	256	391	510	2826	2753	3310	2701	623	809	768	904	522	405	386	688	1136.5
573	390179	1.91e-05	0.000211771	18	9	3597.05	0.0160433	0.211033	20	5.99999	19504.8	4.9e-06	7.79e-05	19	7.59999	8364.71	8910.39	1.06524	833	1805	1510	1079	18169	20343	20787	18720	4107	4094	4182	2427	1144	2243	2804	1563	6613.12
576	390549	1.91e-05	0.000211771	24	9	5963.56	0.0250714	0.211033	20	6	16949.5	7.44e-06	9.65e-05	22	7.425	8588.65	7699.05	0.896421	3200	2610	4818	3610	12877	19882	21410	13629	9003	6502	10717	8213	4757	607	3116	2129	7942.5
629	484364	1.91e-05	0.000211771	18	9	1316.28	0.0214776	0.211033	20	6	3223.25	6.44e-06	8.62e-05	19	7.6	1621.19	1408.5	0.868806	575	358	431	467	3590	2943	3780	2580	1419	1326	766	1039	636	240	698	661	1344.31
654	1-kestose	1.91e-05	0.000211771	18	9	5402.65	0.0145567	0.211033	20	5.99999	36247.2	4.47e-06	7.51e-05	19	7.6	15136.8	16506.1	1.09046	2603	2864	2697	2228	37503	38343	35063	34080	6268	6888	6695	3474	3422	2187	2926	3032	11892.1
668	4-aminobutyric acid	1.91e-05	0.000211771	18	9	4270.04	0.0330952	0.211033	20	6	13173.5	9.65e-06	0.000117379	19	7.6	8596.6	4505.73	0.524129	3984	4382	5325	4580	16936	11766	12590	11402	7295	9523	7531	7217	6212	5559	4193	4879	7710.88
715	erythrose	1.91e-05	0.000211771	18	9	194.101	0.0376683	0.221664	20	6	730.5	1.09e-05	0.000120244	19	7.6	501.831	234.416	0.467121	266	254	394	267	850	860	541	671	461	478	488	499	381	276	268	338	455.75
751	isoribose	1.91e-05	0.000211771	18	9	1035.91	0.0246766	0.211033	20	6	3787.25	7.33e-06	9.65e-05	19	7.6	2071.76	1501.36	0.724679	503	706	906	826	3575	3581	4096	3897	1391	1947	1674	1076	942	789	929	1588	1776.62
755	lactulose	1.91e-05	0.000211771	18	9	4645.69	0.0183461	0.211033	20	5.99999	22223.5	5.56e-06	8.08e-05	19	7.59999	9567.61	10000.7	1.04527	1332	1885	921	1656	23953	19931	23190	21820	4326	5265	4311	2250	1859	2375	3910	2643	7601.69
762	lyxitol	1.91e-05	0.000211771	18	9	3385.63	0.0388775	0.221664	20	6	9509	1.12e-05	0.000121241	19	7.6	5624.78	3654.55	0.649723	1575	1859	2459	2555	8583	8258	10357	10838	3250	4711	4803	6090	2992	2482	2745	4945	4906.38
769	mannose	1.91e-05	0.000211771	18	9	128903	0.0188902	0.211033	20	5.99999	517674	5.71e-06	8.16e-05	19	7.6	235848	217384	0.921713	61657	72478	65116	64717	447045	540675	605929	477045	116956	122396	109972	74446	100511	78270	86213	66414	193115
808	ribitol	1.91e-05	0.000211771	18	9	7767.92	0.0425131	0.223696	20	6	19750.2	1.22e-05	0.0001285	19	7.6	12211.9	7916.9	0.648297	3165	3376	5393	4900	20996	17861	20466	19678	7683	14115	14186	10438	5312	5774	5037	12109	10655.6
827	threonic acid	1.91e-05	0.000211771	18	9	1957.63	0.0211534	0.211033	20	6.00002	5583.5	6.35e-06	8.62e-05	19	7.60001	2776.21	2314.06	0.833534	743	953	941	906	6780	4606	5613	5335	1586	2022	1497	1676	1391	1120	728	1244	2321.31
842	xylose	1.91e-05	0.000211771	18	9	272.413	0.0197208	0.211033	20	6.00001	817.75	5.95e-06	8.35e-05	19	7.6	527.581	327.252	0.620288	224	194	221	187	874	824	783	790	515	539	590	517	378	362	179	235	463.25
102	14702	4.22e-05	0.000390745	18	9	2549.83	0.0153281	0.211033	20	5.99998	14307	9.86e-06	0.000117379	19	7.59999	6796.63	6125.44	0.901248	2196	2198	1819	1556	15089	13718	14852	13569	4006	4190	4029	3121	1996	2533	2963	1645	5592.5
111	16747	4.22e-05	0.000390745	18	9	4960	0.0440525	0.223696	20	5.99999	11776.2	2.64e-05	0.000244359	19	7.6	8182.33	4314.84	0.527336	3171	3186	4318	4480	12417	10612	11801	12275	5061	7903	10562	11271	5433	4850	3902	6104	7334.12
112	16788	4.22e-05	0.000390745	18	9	3034.9	0.0162127	0.211033	20	6.00002	9875.75	1.04e-05	0.000118379	19	7.60001	4219.27	4719.92	1.11866	411	645	377	424	9203	10790	11141	8369	2366	2094	2141	2007	931	949	374	441	3291.44
120	17298	4.22e-05	0.000390745	18	9	2086.67	0.0179965	0.211033	20	6	7195.5	1.15e-05	0.000122241	19	7.6	2926.33	3278.35	1.1203	451	679	396	179	8793	7221	6552	6216	1081	1002	983	731	572	548	666	440	2281.88
127	17703	4.22e-05	0.000390745	18	9	4053.49	0.0172029	0.211033	20	6	15235.8	1.1e-05	0.000120244	19	7.6	7115.71	6567.48	0.922955	2196	2198	1819	1556	17902	13585	15327	14129	4006	4190	4029	3121	1996	2533	2963	1645	5824.69
135	18588	4.22e-05	0.000390745	18	9	13128.9	0.0412827	0.221664	23.1496	6.00001	36534	2.48e-05	0.000235212	20.5748	7.81003	25039.9	13321	0.531992	16275	13218	10140	7725	45208	36578	35714	28636	31622	32247	28778	20217	17049	18678	16884	10310	23079.9
216	88847	4.22e-05	0.000390745	18	9	64934.3	0.024711	0.211033	20	5.99998	160796	1.54e-05	0.000158311	19	7.59999	71961.9	72805.1	1.01172	14987	17389	13679	9365	187965	157419	189779	108019	45993	46037	40369	17227	18109	22527	17839	15698	57650.1
333	125899	4.22e-05	0.000390745	18	9	6763.83	0.01537	0.211033	20	5.99999	33364	9.89e-06	0.000117379	19	7.59999	14040	15430.3	1.09902	2202	2326	1584	2089	35071	35668	31974	30743	7325	7678	5414	3437	2210	1782	4003	2602	11006.8
381	170278	4.22e-05	0.000390745	18	9	381.838	0.0472832	0.229079	20	6	944.75	2.82e-05	0.00025536	19	7.6	501.9	413.131	0.823133	148	129	110	184	1221	1044	941	573	291	687	363	263	266	163	172	176	420.688
413	210291	4.22e-05	0.000390745	18	9	277469	0.0158583	0.211033	20	6	1.5594e+06	1.02e-05	0.000117548	19	7.6	646211	690121	1.06795	118812	113626	165054	123400	1393606	1757259	1453379	1633350	162292	238161	251581	180896	139672	132501	145035	160153	510549
429	215633	4.22e-05	0.000390745	18	9	6626.47	0.0763538	0.297992	20	6	18749.5	4.39e-05	0.000366815	19	7.6	10063.5	7488.55	0.744129	4586	3255	3072	3287	29112	14392	13646	17848	6390	10167	5602	6402	6626	5308	3569	4201	8591.44
555	380135	4.22e-05	0.000390745	18	9	12051.4	0.0521301	0.24014	20	6	65732.5	3.08e-05	0.000276616	19	7.6	52579.2	13412	0.255081	39492	44028	41712	37045	72447	67854	56830	65799	55083	47844	46355	55749	46563	45727	30665	45891	49942.8
579	393358	4.22e-05	0.000390745	18	9	280116	0.0157481	0.211033	20	6	1.57185e+06	1.01e-05	0.000117548	19	7.6	649085	696977	1.07378	118044	113202	163408	124387	1405246	1773898	1461206	1647037	160056	235977	249850	179370	136181	129459	141920	153953	512075
617	458481	4.22e-05	0.000390745	18	9	3240.67	0.0669983	0.274912	20	6.00001	12007.8	3.89e-05	0.000338353	19	7.60001	5983.23	5097.76	0.852008	2196	1658	1819	1529	15089	13718	14852	4372	4113	4190	4029	3121	1996	2533	2963	1520	4981.12
637	513549	4.22e-05	0.000390745	18	9	6200.62	0.0153396	0.211033	20	5.99999	27253.2	9.87e-06	0.000117379	19	7.59999	10990.2	12953.5	1.17864	1230	1054	995	841	29680	25669	29112	24552	5476	5226	3993	1966	197	1829	1983	1298	8443.81
71	4219	8.77e-05	0.000697384	18	9	6706.91	0.0433634	0.223696	20	5.99999	15476	5.13e-05	0.000417607	19	7.6	9450.58	7244.35	0.766551	2341	1784	1808	1451	11948	17561	18636	13759	9845	8511	12690	10084	5721	8743	1646	1896	8026.5
149	32158	8.77e-05	0.000697384	18	9	832.972	0.0226081	0.211033	20	6	2701.25	2.8e-05	0.00025536	19	7.6	1291.92	1131.77	0.876037	332	256	391	510	2826	2302	3266	2411	416	809	768	823	522	405	386	688	1069.44
274	110413	8.77e-05	0.000697384	18	9	5967.8	0.18115	0.495959	20	5.99999	28497	0.000191417	0.00121327	19	7.59999	22000.2	7606.94	0.345767	11815	13824	15603	15531	42337	25708	23531	22412	22760	24397	19904	23463	18920	16070	14092	17710	20504.8
283	111740	8.77e-05	0.000697384	18	9	2566.62	0.0663822	0.274912	20	5.99999	11326	7.6e-05	0.000552225	19	7.59999	4836.26	5219.04	1.07915	865	526	720	1129	9777	15254	16154	4119	2248	2831	2396	1276	1110	1177	776	607	3810.31
334	125942	8.77e-05	0.000697384	24	9	1347.04	0.0161526	0.211033	20	5.99999	9400.75	2.05e-05	0.000203232	22	7.425	3659.54	4132.11	1.12913	946	1259	563	1549	10303	8701	10878	7721	2288	2233	1354	1701	1207	1125	780	396	3312.75
335	125960	8.77e-05	0.000697384	18	9	22323.4	0.0198278	0.211033	20	5.99999	79484.2	2.48e-05	0.000235212	19	7.6	34462.3	35317.8	1.02483	7673	8668	5763	5403	83449	69600	96376	68512	11445	22236	15584	9255	9428	12010	8013	6898	27519.6
342	130528	8.77e-05	0.000697384	24	9	1053.59	0.0436029	0.223696	20	5.99998	5597.5	5.15e-05	0.000417607	22	7.42499	3490.73	1659.74	0.475471	2607	2511	2896	2595	7405	4269	6045	4671	3076	3059	3585	2660	2904	2066	2258	1016	3351.44
400	187304	8.77e-05	0.000697384	18	9	15271.4	0.0331886	0.211033	24.2975	6	71670.8	4e-05	0.000344158	21.1488	7.89841	61164.4	14091.8	0.230392	46918	44053	50764	40499	71903	69928	77733	67119	60515	68973	75551	64059	54247	59195	48904	50069	59401.9
447	223134	8.77e-05	0.000697384	18	9	2876.86	0.0360629	0.221664	20	5.99999	6065.5	4.32e-05	0.000364269	19	7.59999	2898.15	2546.19	0.878558	820	854	959	830	8832	5185	5068	5177	1601	2154	1378	1223	1500	817	960	1004	2397.62
456	224095	8.77e-05	0.000697384	18	9	969.09	0.0160513	0.211033	20	6	3458.75	2.04e-05	0.000203232	19	7.6	1789.63	1531.84	0.855953	533	492	550	529	3391	3209	3980	3255	1130	1050	1729	1633	525	737	500	573	1488.5
597	403865	8.77e-05	0.000697384	18	9	473.408	0.0177744	0.211033	20	5.99999	1695.25	2.24e-05	0.000218931	19	7.59999	750.93	751.253	1.00043	160	219	116	180	1843	1508	1979	1451	341	363	431	274	176	257	208	146	603.25
623	474221	8.77e-05	0.000697384	18	9	4454.07	0.0340237	0.214044	20	6	13156	4.09e-05	0.000348621	19	7.6	8426.28	4675.16	0.55483	3802	4382	4639	4580	17325	11665	12469	11165	6499	9818	7499	7183	5483	5370	3896	4341	7507.25
628	480022	8.77e-05	0.000697384	18	9	1256.18	0.145208	0.422106	20	6	4044.5	0.000156255	0.00105378	19	7.6	2007.09	1875.03	0.934206	229	323	400	247	1342	5410	6346	3080	1464	1917	572	1993	631	918	795	549	1638.5
708	cysteine-glycine	8.77e-05	0.000697384	18	9	545.179	0.190764	0.517087	20	6	2181.25	0.000200711	0.00124411	19	7.6	1228.48	832.917	0.678005	593	433	506	489	3683	1777	2407	858	864	1133	915	791	855	652	544	536	1064.75
837	uric acid	8.77e-05	0.000697384	18	0	63404.1	0.0106025	0.211033	24.2975	17.9999	93302.1	1.38e-05	0.000144062	21.1488	18.408	57356.4	58341.4	1.01717	128970	132008	110318	112566	14646	23322	17860	24977	27370	23679	22960	21787	112090	87277	93735	80108	64604.6
309	119129	0.000171384	0.00126734	18	9	1810.55	0.0783913	0.298914	20	6	5982.25	0.000164144	0.00108606	19	7.6	3332	2393.44	0.718319	721	1414	802	1865	5141	3322	8344	7122	2430	2607	3112	2234	1402	1747	946	2575	2861.5
360	131511	0.000171384	0.00126734	18	9	513.36	0.0154923	0.211033	20	5.99999	2252.25	3.67e-05	0.000322662	19	7.6	938.681	1035.82	1.10348	156	95	189	171	2401	2009	2558	2041	392	361	421	320	172	223	143	109	735.062
439	223071	0.000171384	0.00126734	18	9	639.225	0.0345595	0.215805	20	6	1821.75	7.72e-05	0.000556349	19	7.6	1120.59	628.715	0.561056	586	511	543	586	1547	2247	1797	1696	1109	807	853	903	943	711	475	638	997
453	223335	0.000171384	0.00126734	18	9	724.077	0.0566675	0.250108	20	6.00001	2385.5	0.000121808	0.0008281	19	7.60001	1171.69	1020.94	0.871336	340	391	260	303	2918	1088	3032	2504	461	1115	767	588	595	499	329	346	971
543	376826	0.000171384	0.00126734	18	9	960.251	0.032026	0.211033	20	6.00001	3324.75	7.2e-05	0.000536931	19	7.60001	1930.85	1165.75	0.60375	686	745	994	1143	3567	2872	3109	3751	1220	1543	1153	1688	1371	1045	846	1494	1701.69
701	cholesterol	0.000171384	0.00126734	24	6	10013.7	0.0237328	0.211033	20	6	22038.2	5.46e-05	0.000437993	22	6.05	9649	10821.4	1.1215	5457	18065	3538	3542	24973	22518	18041	22621	5840	4360	3456	2359	2189	1971	3008	1706	8977.75
734	glycerol-alpha-phosphate	0.000171384	0.00126734	18	9	19322.8	0.0284428	0.211033	20	6.00001	75505.2	6.45e-05	0.000508153	19	7.60001	48170.9	23037.5	0.478245	31848	32252	27695	21163	83950	67964	80907	69200	41175	44254	34578	32727	33464	38586	30671	27842	43642.2
748	isochlorogenic acid	0.000171384	0.00126734	18	9	465.63	0.0206109	0.211033	20	5.99999	1436.75	4.79e-05	0.000395684	19	7.6	604.249	648.591	1.07338	107	163	71	80	1726	1172	1648	1201	256	257	211	205	96	95	224	116	476.75
87	4819	0.000320124	0.00195554	18	9	7327.75	0.0170562	0.211033	20	5.99999	23884	7.16e-05	0.000536931	19	7.6	9960.86	11043.6	1.1087	3162	1546	829	844	18512	25559	27326	24139	5039	4038	4552	2666	2442	1382	1414	1189	7789.94
97	8270	0.000320124	0.00195554	18	9	1371.08	0.0583881	0.253717	20	6	4424.25	0.000222194	0.00130076	19	7.6	2159.97	2042.96	0.945824	574	374	755	354	3597	6364	5696	2040	1791	1402	1618	1454	866	488	348	413	1758.38
98	8598	0.000320124	0.00195554	18	9	7897.32	0.0205211	0.211033	20	6	23639.2	8.5e-05	0.000601869	19	7.6	9544.92	10725.9	1.12373	1146	1456	1354	1362	28502	24761	23453	17841	3389	572	4814	2658	1945	2207	1676	1847	7436.44
126	17682	0.000320124	0.00195554	18	9	892.369	0.0180203	0.211033	20	6	2951.5	7.54e-05	0.000552225	19	7.6	1161.56	1372.53	1.18163	98	110	174	127	3605	3033	2758	2410	444	452	261	172	139	62	210	213	891.75
164	46122	0.000320124	0.00195554	18	9	3819.08	0.0428883	0.223696	24.0327	6.00002	21134.8	0.000167445	0.00109424	21.0163	7.87756	18109.7	3951.44	0.218195	14555	12005	14748	14758	22971	20249	21564	19755	18829	20059	21030	18902	15857	18821	12775	14638	17594.8
193	64666	0.000320124	0.00195554	24	9	2355.02	0.0412283	0.221664	21.0501	6.00001	6882.25	0.000161486	0.00108041	22.5251	7.43366	4235.02	2641.28	0.623674	3500	2888	996	2733	8468	6196	7252	5613	4509	4849	4793	4462	1281	3899	757	2931	4070.44
223	95440	0.000320124	0.00195554	18	9	5213.14	0.0737742	0.290615	20	5.99999	9585.5	0.000275221	0.00154674	19	7.59999	5593.51	4291.27	0.767189	855	1000	1701	1114	9259	9107	10095	9881	1088	6246	5898	8375	4050	4913	1075	1342	4749.94
276	110501	0.000320124	0.00195554	24	9	2404.69	0.0149162	0.211033	20	6.00001	9314.75	6.33e-05	0.000503248	22	7.42501	5067.86	3416.58	0.674165	2244	2641	3956	3262	8578	9127	9740	9814	4269	5136	3036	4905	3322	2753	1953	1762	4781.12
298	117769	0.000320124	0.00195554	24	6	9799.09	0.0440799	0.223696	20.0911	6	20785.8	0.000171711	0.00111348	22.0456	6.04753	9460.59	9579.86	1.01261	5457	21497	3538	3542	24973	17508	18041	22621	5840	4360	3456	2359	2189	1971	3008	1706	8879.12
317	121476	0.000320124	0.00195554	18	9	900.5	0.534461	0.950529	23.9024	5.99999	1721.5	0.00165504	0.006976	20.9512	7.86739	1041.59	956.553	0.918362	160	247	171	190	2104	1996	1332	1454	499	424	503	4603	297	253	275	124	914.5
319	122710	0.000320124	0.00195554	18	9	1423.05	0.0162906	0.211033	20	5.99999	5045.5	6.87e-05	0.000535854	19	7.6	2113.98	2333.91	1.10403	220	422	219	514	4386	5227	6015	4554	998	987	1010	555	313	359	336	368	1655.19
325	125788	0.000320124	0.00195554	18	9	2337.34	0.0821794	0.298914	20	6	8595.25	0.000303739	0.00168455	19	7.6	4715.55	3552.9	0.753444	1496	3610	1430	1197	14035	5709	8524	6113	3268	4682	3990	3248	1533	2375	1682	1382	4017.12
354	131202	0.000320124	0.00195554	18	9	1759.99	0.019688	0.211033	20	5.99999	6828.5	8.18e-05	0.000584195	19	7.6	2891.92	3033.69	1.04902	261	845	533	418	8282	6720	6049	6263	1233	1533	847	673	1086	812	505	669	2295.56
359	131496	0.000320124	0.00195554	18	9	1806.3	0.0604446	0.259973	20	5.99999	4190.25	0.00022935	0.00133339	19	7.59999	2588.83	1892.17	0.730895	844	371	452	525	4637	4488	3005	4631	2814	2967	3277	1935	2421	2167	443	493	2216.88
374	160854	0.000320124	0.00195554	18	9	17711.3	0.017086	0.211033	20	6	95746	7.17e-05	0.000536931	19	7.6	45407.1	37783.1	0.832097	17128	16061	14167	19422	108516	94519	95270	84679	19549	23007	22238	18232	19059	18645	17773	19411	37979.8
423	210993	0.000320124	0.00195554	18	9	3546.49	0.0293523	0.211033	20	6	8593.75	0.000118161	0.000813862	19	7.6	3726.56	3731.02	1.0012	660	974	720	688	11461	6841	6818	9255	599	1863	1489	1792	1065	1133	1144	1388	2993.12
451	223248	0.000320124	0.00195554	18	9	1412.8	0.0489076	0.234256	20	6	5950	0.00018889	0.00120632	19	7.6	4137.66	1741.52	0.420896	3101	2515	2779	2718	6806	5250	7045	4699	3879	3879	4511	3078	1231	3503	2800	2931	3795.31
472	228360	0.000320124	0.00195554	18	9	35216.4	0.0550049	0.245657	20	6.00001	106373	0.00021037	0.00127584	19	7.60001	55729.2	42872.8	0.769305	32939	15820	16748	7135	145965	79124	83280	117123	30817	49336	29415	40080	21214	18057	26332	43437	47301.4
545	377213	0.000320124	0.00195554	24	9	4234.16	0.0168175	0.211033	23.6461	6	10991.8	7.07e-05	0.000536931	23.8231	7.48927	7319.18	4389.23	0.599689	5054	4114	3976	4374	12951	10409	10512	10095	7499	9918	10983	8910	4100	6106	3601	3974	7286
669	5-hydroxymethyl-2-furoic acid	0.000320124	0.00195554	18	9	549.422	0.0180981	0.211033	20	5.99999	2327.25	7.57e-05	0.000552225	19	7.6	1010.67	1026.84	1.01601	115	164	283	269	2240	2099	2225	2745	348	496	411	430	440	187	149	340	808.812
742	homoserine	0.000320124	0.00195554	18	9	3555.33	0.0165132	0.211033	24.7059	12	7922.5	6.95e-05	0.000536931	21.3529	10.524	5879.35	3070.93	0.522325	705	2509	2792	2348	6993	7811	8618	7546	6824	7359	8168	9339	3656	4649	4699	4613	5539.31
760	linoleic acid	0.000320124	0.00195554	18	6	1035.56	0.0211553	0.211033	20	6.00001	1932.75	8.74e-05	0.000613852	19	6.01667	901.013	1018.73	1.13065	227	813	392	496	2216	1903	1941	1671	301	274	109	159	525	438	471	505	777.562
807	raffinose	0.000320124	0.00195554	18	9	3860.1	0.0215699	0.211033	20	5.99999	10170.5	8.9e-05	0.000619775	19	7.6	4364.12	4546.5	1.04179	829	1194	606	802	11159	12084	10371	7068	2147	2142	1859	1065	1070	895	1106	1129	3470.38
818	sorbitol	0.000320124	0.00195554	18	9	7823.78	0.226622	0.581191	24.5682	6.00001	23481.2	0.000764015	0.00370152	21.2841	7.92002	17105.3	6812.18	0.398249	11404	8337	9121	5757	31107	24134	25105	13579	17677	20803	17074	17951	15602	17865	12331	12798	16290.3
46	2197	0.000572095	0.00305238	24	15	4943.38	0.0772256	0.298914	21.8859	12	28061.2	0.000487187	0.00256687	22.9429	13.4595	22728.4	6148.07	0.270502	18309	20465	17960	17072	24011	20061	18471	18565	27969	32685	27475	24116	25281	28264	20626	20665	22624.7
69	3248	0.000572095	0.00305238	18	9	3522.1	0.0777646	0.298914	20	6	14833.5	0.000490278	0.00256711	19	7.6	6803.71	6215.52	0.913549	7326	438	1231	1155	19258	6070	21633	12373	3605	3977	3411	2072	1681	1774	1919	1387	5581.88
86	4818	0.000572095	0.00305238	24	12	14820.1	0.0670534	0.274912	24.7059	12	77444	0.000428433	0.00228588	24.3529	12.0025	64014.1	17790.4	0.277914	52864	40903	50068	49397	85659	63598	72604	63637	71394	79875	89346	69161	61889	70518	51125	55499	64221.1
191	64632	0.000572095	0.00305238	18	9	267.817	0.0804021	0.298914	20	5.99999	845	0.000505372	0.00262352	19	7.59999	601.881	263.283	0.437434	376	327	338	342	1044	795	835	706	470	457	678	781	366	619	300	368	550.125
195	64736	0.000572095	0.00305238	24	12	2033.99	0.0410961	0.221664	24.7059	12	7887.25	0.000274091	0.00154674	24.3529	12.0025	6363.65	2157.85	0.339091	4948	4433	4304	4222	7742	7505	7096	7386	7622	7982	8844	7101	7105	6988	4541	4401	6388.75
204	66305	0.000572095	0.00305238	24	12	19524.6	0.0450201	0.224568	23.9024	12	81268.5	0.000297913	0.00166318	23.9512	12	59706.8	25410.1	0.425582	46725	41055	33377	32024	80519	57651	61465	61867	72683	95222	84597	72572	61429	68965	44515	39994	59666.2
240	104135	0.000572095	0.00305238	24	12	5702.46	0.0394735	0.221664	20.9501	12	38786	0.000264179	0.00151498	22.4751	12.0555	31724	7903.71	0.24914	27980	26794	24494	25675	34893	30397	32524	29023	35849	40036	42668	36591	31389	32243	26425	24696	31354.8
273	110371	0.000572095	0.00305238	24	9	4972.73	0.0746939	0.29287	20	6.00001	17934	0.00047264	0.00250588	22	7.42501	8563.13	7406.16	0.864889	3415	3255	3760	4010	28783	14380	12508	16065	5454	10352	7192	3668	6374	3154	3341	1354	7941.56
306	119023	0.000572095	0.00305238	18	9	28888.5	0.0288681	0.211033	20	6	64063	0.000198369	0.00124411	19	7.6	30082.1	29780.3	0.989969	7438	5279	4769	6061	51051	84240	73357	47604	23598	23357	18996	13107	10990	14843	608	2349	24227.9
365	133612	0.000572095	0.00305238	24	9	116.673	0.0323528	0.211033	20	6	544	0.000220205	0.00130076	22	7.425	337.469	176.127	0.521906	225	215	177	256	390	588	628	570	380	321	246	315	253	189	167	243	322.688
366	133616	0.000572095	0.00305238	18	9	162.635	0.0315505	0.211033	20	5.99998	467	0.000215197	0.00128661	19	7.59999	241.271	183.875	0.762111	53	127	101	84	349	547	567	405	161	198	146	99	111	85	106	143	205.125
435	215866	0.000572095	0.00305238	18	9	6055.31	0.102514	0.342159	20	5.99999	36594.8	0.000630108	0.00316179	19	7.59999	31028.1	6579.16	0.212039	27727	23619	22765	21993	43483	33202	36222	33472	29853	33889	34539	28142	25567	30220	25924	25140	29734.8
440	223080	0.000572095	0.00305238	18	9	13665.9	0.0165132	0.211033	20	5.99998	59078	0.000118749	0.000813862	19	7.59999	25786.5	27362.6	1.06112	4248	3766	2798	5163	60252	60141	62849	53070	16390	16404	14306	4770	7988	7855	3883	2639	20407.6
469	228316	0.000572095	0.00305238	24	12	2170.11	0.0403084	0.221664	23.7736	12	7339.75	0.000269283	0.00153382	23.8868	12.0003	5183.5	2741.57	0.528904	3344	3037	3208	2815	7153	5938	6219	4801	7051	8618	8118	5572	4720	5832	3436	2912	5173.38
489	250811	0.000572095	0.00305238	24	9	174056	0.027328	0.211033	20	6	444254	0.000188643	0.00120632	22	7.425	211346	204097	0.965698	161205	98603	13844	12127	418152	565378	406558	386930	104765	233589	269746	171179	94871	67285	81003	22240	194217
652	1-docosanol	0.000572095	0.00305238	24	0	985.53	0.249205	0.616071	24.7059	6.63e-05	2309.74	0.00140512	0.00610574	24.3529	3.27e-05	1202.57	1265.98	1.05273	2313	1930	1911	3085	636	453	512	440	422	188	497	346	803	458	935	4087	1188.5
686	behenic acid	0.000572095	0.00305238	24	12	7503.46	0.0905934	0.314281	25.2722	12	19576.8	0.000563245	0.00286033	24.6361	12.008	13520.9	9006.06	0.666085	5212	6592	2885	3089	30249	12619	17784	14754	16136	19931	22005	20235	11481	14254	15678	6464	13710.5
752	isothreonic acid	0.000572095	0.00305238	18	9	883.53	0.050258	0.23669	20	6.00002	3057.5	0.00032941	0.00181498	19	7.60001	1838.6	1036.98	0.564007	735	828	994	1143	3478	2810	2191	3751	1220	1543	1119	1736	1437	991	846	1334	1634.75
768	maltotriose	0.000572095	0.00305238	18	9	3012.98	0.0301332	0.211033	20	6	7764.5	0.000206323	0.00126956	19	7.6	3048.08	3503.8	1.14951	218	293	363	495	8266	4789	7616	10387	613	848	647	582	415	779	621	817	2359.31
841	xylitol	0.000572095	0.00305238	24	21	25695.7	0.0812877	0.298914	24.1644	17.9999	195151	0.000510429	0.00262373	24.0822	19.5053	163914	28834.9	0.175915	158863	176511	165719	176394	115862	143086	122791	152796	153670	135134	143377	196195	179498	185100	212198	203809	163813
242	105081	0.000779665	0.00413369	24	9	610.233	0.017319	0.211033	20	5.99999	3967.25	0.000164907	0.00108606	22	7.42499	1741.77	1625.21	0.933079	861	435	699	773	4445	3752	4411	3261	1119	1149	1353	735	528	720	773	672	1605.38
134	18520	0.000987235	0.00470192	24	12	12636	0.0352797	0.218682	24.8451	12	51611	0.000392354	0.00210672	24.4225	12.0036	41536.2	13950.7	0.335869	30810	28597	27283	28728	53110	44229	48843	46655	48145	55286	56468	46545	41381	48358	30222	33032	41730.8
136	18619	0.000987235	0.00470192	18	9	14084.9	0.109898	0.351928	20	6	34004.2	0.00109893	0.00503476	19	7.6	13278.3	15802.7	1.19011	1210	1324	1498	1622	65886	24641	21572	23918	3109	5782	2352	2937	2970	1157	1074	1698	10171.9
146	31544	0.000987235	0.00470192	24	0	2328.86	0.345474	0.739174	21.995	7.15e-05	15095.2	0.00306393	0.0116873	22.9975	3.74e-05	12131.1	3863.68	0.318492	17203	16239	13427	13512	10474	10360	12945	13106	10453	738	10134	12711	11010	16099	14553	13374	12271.1
160	42007	0.000987235	0.00470192	24	12	7351.08	0.0511478	0.2387	24.9858	12	34153.5	0.000550074	0.00281038	24.4929	12.0049	28648.3	8335.9	0.290974	22182	19243	23565	17227	32673	37547	30071	34303	38591	34671	32039	31313	30401	27464	20259	28995	28784
187	64604	0.000987235	0.00470192	24	12	1608.67	0.0467855	0.227978	24.4321	12	7120	0.000507276	0.00262352	24.2161	12.0009	5660.08	1933.17	0.341544	4471	4113	3649	3889	7353	6157	6395	5814	6434	8075	7776	6195	5622	6403	4392	4043	5673.81
336	126582	0.000987235	0.00470192	18	9	1481.04	0.0178285	0.211033	20	5.99999	5572	0.000210288	0.00127584	19	7.6	2385.22	2503.62	1.04964	484	497	420	459	6723	5009	5637	4919	1079	1377	1075	449	642	350	584	585	1893.06
415	210345	0.000987235	0.00470192	24	12	811.051	0.0302055	0.211033	22.6735	12	4644.75	0.000340554	0.0018642	23.3368	12.0097	3401.33	1241.24	0.364929	2500	2303	1898	2463	3745	3151	3046	3271	4722	5058	5198	3601	3112	3912	3276	2743	3374.94
458	224100	0.000987235	0.00470192	18	6	2740.22	0.01888	0.211033	20	6.00001	6202	0.000221622	0.00130076	19	6.01667	3345.07	2834.17	0.847268	2018	2181	1811	2611	7095	6038	6301	5374	1336	1891	1407	1522	2397	1853	1977	2214	3001.62
525	355819	0.000987235	0.00470192	24	12	917.294	0.0580393	0.253508	25.2722	12	6516.75	0.000616945	0.00311428	24.6361	12.008	5561.44	1151.45	0.207042	4813	4192	4053	4357	6191	6104	6363	5139	5700	6698	7360	6309	5856	6207	5011	5018	5585.69
526	355856	0.000987235	0.00470192	18	9	1533.71	0.0895785	0.313963	24.5682	6.00003	6470.5	0.000913821	0.00430364	21.2841	7.92002	5378.3	1729.55	0.321579	4012	1876	3974	3723	7840	5716	6640	5686	5664	7803	5983	6132	5295	5414	4109	2875	5171.38
603	416597	0.000987235	0.00470192	24	9	380.777	0.0217557	0.211033	20	5.99999	2220.25	0.000252334	0.00145697	22	7.42499	981.674	920.293	0.937473	339	370	444	390	2519	2524	1542	2296	562	871	755	383	422	347	319	388	904.438
627	480021	0.000987235	0.00470192	18	9	721.602	0.018193	0.211033	20	6	3004.5	0.000214224	0.00128661	19	7.6	1356.71	1242.29	0.915666	277	516	430	439	3161	3389	3038	2430	453	732	540	511	521	405	506	452	1112.5
683	asparagine	0.000987235	0.00470192	18	0	63038.9	0.071772	0.286748	20	17.9999	495005	0.000747873	0.00364426	19	18.05	456484	56446	0.123654	548001	480605	566736	492426	396677	379147	390791	362839	469151	459514	469659	504402	481486	469405	504546	524585	468748
691	beta-glycerolphosphate	0.000987235	0.00470192	18	9	498.687	0.257458	0.62367	20	6	1718.25	0.00235808	0.00937669	19	7.6	1177.53	524.424	0.445361	598	234	771	656	2216	1269	1907	1481	1059	1320	587	1236	1184	1042	748	883	1074.44
746	inositol-4-monophosphate	0.000987235	0.00470192	18	6	5832.04	0.109426	0.351928	20	6.00001	11242	0.00109467	0.00503476	19	6.01667	5833.74	5420.09	0.929093	1686	1565	3360	6435	9756	9819	12871	12522	1075	1037	280	4080	1736	2879	5288	8442	5176.94
757	leucine	0.000987235	0.00470192	18	0	701084	0.0331711	0.211033	20	17.9999	8.43149e+06	0.000370922	0.00201734	19	18.05	7.76984e+06	776244	0.0999048	8253903	8215279	8683895	9016497	7196317	6708037	6593655	6446635	7773548	8009250	8168718	8224318	8715601	8072796	8323304	8614259	7.9385e+06
799	phosphoethanolamine	0.000987235	0.00470192	18	0	69367.7	0.0806069	0.298914	24.4321	17.9999	161656	0.000830696	0.00395637	21.2161	18.4233	125727	64537.5	0.513312	164999	203027	210896	211215	51224	87854	69734	109983	122778	101443	53647	103363	115665	143283	146607	241071	133549
826	threitol	0.000987235	0.00470192	18	9	1179.81	0.0169043	0.211033	20	6.00001	5313.75	0.000200275	0.00124411	19	7.60001	2802.3	2144.76	0.765358	881	1306	1157	1132	5719	5103	5193	5240	1278	2142	1851	2592	436	1009	1474	1578	2380.69
45	2193	0.00131724	0.00623838	18	9	645.588	0.0254615	0.211033	20	5.99999	2719.75	0.000379083	0.00204851	19	7.59999	1624.42	868.841	0.534863	734	941	936	1034	2473	2360	3086	2960	1107	1177	1169	1144	1107	882	855	1293	1453.62
28	1840	0.00164724	0.00708482	24	12	20203.8	0.0501529	0.23669	23.7736	12	82338.5	0.000859295	0.00406958	23.8868	12.0003	60128.5	26532.7	0.441267	44534	40478	33307	35488	80060	61149	61139	62928	73893	95193	88467	71801	64024	69957	44590	33479	60030.4
119	17297	0.00164724	0.00708482	18	9	755.897	0.100988	0.3419	20	6.00002	2813.25	0.00161385	0.00687109	19	7.60001	1550.78	1032.81	0.665992	688	466	875	590	1570	2630	4153	2900	475	1254	973	1462	794	786	727	1221	1347.75
133	18489	0.00164724	0.00708482	18	9	1505.78	0.0625458	0.263631	20	6	5453	0.00104888	0.00485827	19	7.6	2054.54	2567.25	1.24955	112	152	116	189	2298	7739	7856	3919	593	102	543	460	159	122	201	237	1549.88
228	100114	0.00164724	0.00708482	18	9	411.89	0.377415	0.776002	20	5.99998	1862.75	0.0052117	0.0180801	19	7.59999	903.757	765.954	0.847522	129	211	344	296	3999	1292	859	1301	418	784	477	278	384	215	485	579	753.188
241	104994	0.00164724	0.00708482	24	12	9261.33	0.070335	0.285059	24.5682	12	43470.5	0.0011659	0.00528417	24.2841	12.0016	34427.2	11797	0.342664	30242	25728	19337	20439	45791	38787	38314	33337	41069	45334	51899	35580	30743	40156	28777	27068	34537.6
296	117535	0.00164724	0.00708482	18	9	1453.63	0.0790963	0.298914	20	6	4381.5	0.00129584	0.00577985	19	7.6	1764.49	1971.8	1.11749	245	307	185	305	6295	2406	6468	2357	610	679	421	264	311	292	246	639	1376.88
308	119060	0.00164724	0.00708482	18	9	4475.63	0.3499	0.739263	20	6	15489	0.00487538	0.0172687	19	7.6	8971.46	6433.95	0.717157	3218	2992	4072	2591	30680	8997	13034	9245	6696	14055	5592	5635	6692	2595	3192	4021	7706.69
316	121468	0.00164724	0.00708482	24	6	359.917	0.0819097	0.298914	20.7529	6	1273	0.00133721	0.00590194	22.3765	6.03175	919.945	202.757	0.220401	907	1066	1124	1117	1280	1225	1335	1252	626	736	697	364	188	608	1028	1001	909.625
409	209677	0.00164724	0.00708482	18	9	261.63	0.47831	0.888902	23.7736	6	676.5	0.00641829	0.0214707	20.8868	7.85741	434.126	295.992	0.681811	102	103	139	161	1401	385	418	502	217	775	754	371	471	151	187	168	394.062
412	210272	0.00164724	0.00708482	18	9	8066.32	0.419778	0.825718	20	5.99999	21742.2	0.00572313	0.019454	19	7.6	13263.1	10167.3	0.766585	1367	1946	4452	3061	44172	12302	13064	17431	8564	26691	10524	11896	13308	5599	3439	2415	11264.4
455	223946	0.00164724	0.00708482	24	12	363.806	0.0687927	0.280156	24.8451	12	1325.25	0.00114285	0.00520769	24.4225	12.0036	1036.25	394.528	0.380727	454	758	664	826	1341	1364	1271	898	1321	1440	1433	1107	1175	1085	820	711	1041.75
477	229314	0.00164724	0.00708482	18	9	3765.52	0.0459121	0.226339	23.9024	6.00002	21383.8	0.000793317	0.00379981	20.9512	7.8674	18409.9	3913.01	0.212549	15153	12994	14748	15120	22500	20885	22119	20031	19121	19112	22646	19174	16616	18994	12941	14087	17890.1
560	382613	0.00164724	0.00708482	24	12	12222.7	0.0444349	0.223696	24.8451	12	49336.5	0.000770186	0.0037101	24.4225	12.0036	40462.2	13251.1	0.327492	29483	28032	27132	28376	52470	43455	48576	47587	45250	55057	51767	45272	40899	47260	28622	31114	40647
596	403856	0.00164724	0.00708482	18	9	200.288	0.227951	0.582312	20	6.00002	751.5	0.00333709	0.012503	19	7.60001	541.58	240.132	0.443393	328	268	387	248	352	1108	920	626	503	646	552	524	429	396	329	294	494.375
608	421550	0.00164724	0.00708482	24	12	1182.28	0.0566373	0.250108	24.1644	12	6627	0.000959052	0.00449156	24.0822	12.0001	5536.61	1488.36	0.268821	4980	4138	4247	4248	7527	5500	5700	5871	6166	7174	6700	6468	5580	5569	4132	4650	5540.62
641	514511	0.00164724	0.00708482	18	9	5254.51	0.0387401	0.221664	20	6	24221.2	0.000680231	0.00339311	19	7.6	17784.1	6073.53	0.341514	14239	13239	13357	11164	26242	21397	27106	22140	18180	16036	16558	15352	13962	16747	7679	12045	16590.2
671	9-hydroxydec-2-enoic acid	0.00164724	0.00708482	18	6	2009.24	0.603072	1	20	6	9218	0.00786218	0.0249166	19	6.01667	5675.14	3707.43	0.653276	2666	3829	3029	4140	5454	5993	11268	14157	1589	2445	3178	3824	2876	4628	4649	9889	5225.88
809	ribonic acid	0.00164724	0.00708482	18	9	1090.71	0.115256	0.359856	20	5.99998	6798.75	0.00181677	0.00750754	19	7.59999	3723.4	2519.83	0.676754	1428	1380	1872	2039	7700	8980	8433	2082	2187	2411	2624	2854	1894	1682	1790	2293	3228.06
121	17382	0.00267199	0.0105751	24	6	1050.76	0.0817236	0.298914	20	6.00001	4345.75	0.00205904	0.00834504	22	6.05	2577.24	1492	0.578913	2437	2439	1473	3220	5377	3559	5793	2654	1558	1578	2262	1362	1049	1396	2494	1104	2484.69
289	113563	0.00267199	0.0105751	18	12	1681.15	0.0775021	0.298914	20	12	6606.5	0.00196366	0.00803576	19	12.0333	4604.16	2317.03	0.503247	3533	3401	2646	2451	4473	5428	5067	4545	6800	7612	7437	4577	1139	4879	2845	2454	4330.44
340	128049	0.00267199	0.0105751	18	12	2160.21	0.148162	0.424503	24.0327	12	11607.5	0.00349743	0.0130457	21.0163	12.2524	8796.54	4091.34	0.465108	7107	7675	7356	5171	12552	7365	10565	10140	9188	14237	13641	9364	7629	1975	7003	4687	8478.44
348	130599	0.00267199	0.0105751	18	9	27749.7	0.0734798	0.290615	24.7059	12	127257	0.00187221	0.0076989	21.3529	10.5239	111381	24351.9	0.218636	89384	83726	78053	76617	127358	123279	139523	115936	121372	125672	154611	107372	93345	124247	85639	92817	108684
358	131471	0.00267199	0.0105751	24	12	1486.16	0.110212	0.351928	23.0287	12	8383	0.00268875	0.0104511	23.5144	12.0051	6527.9	2131.55	0.326529	6311	4034	4410	4764	7183	7459	6627	6042	6954	8316	10406	7856	6697	7369	4841	4643	6494.5
367	133808	0.00267199	0.0105751	18	9	2170.64	0.344845	0.739174	20	6	11536	0.00736179	0.023687	19	7.6	8963.04	2569.79	0.286709	7717	4372	4196	9067	13016	10633	11776	10719	9818	10165	9056	5165	4730	8156	9682	7058	8457.88
393	170791	0.00267199	0.0105751	24	12	8527.71	0.114123	0.357814	24.1644	12	51212.8	0.00277352	0.0106761	24.0822	12.0001	43061.3	10227.9	0.23752	36677	35985	29435	36209	55771	41769	43268	44388	42897	54577	58057	49320	40949	47751	38924	33444	43088.8
403	187855	0.00267199	0.0105751	24	0	1945.6	0.221027	0.574701	25.7143	6.63e-05	4915.98	0.00498121	0.0174965	24.8571	3.21e-05	2300.77	2407.93	1.04658	4381	3496	3698	8089	1494	685	726	791	745	484	905	605	1186	848	1460	6239	2239.5
443	223096	0.00267199	0.0105751	18	9	1564.47	0.1116	0.35368	20	5.99999	3081.5	0.00271887	0.0105138	19	7.59999	1920.91	1360.97	0.708502	537	236	556	582	2812	3505	3720	2289	1777	722	2577	3030	1115	2063	478	455	1653.38
470	228318	0.00267199	0.0105751	24	12	2986.82	0.0897616	0.313963	23.9024	12	18901.2	0.00223906	0.00894562	23.9512	12	15257.1	4188.37	0.274519	13635	12558	10783	9813	16158	17076	14474	16456	19319	17847	22610	15829	13611	18205	13932	11701	15250.4
498	342012	0.00267199	0.0105751	18	6	2604.27	0.0365736	0.221664	20	6	5438.25	0.00100005	0.00465769	19	6.01667	2876.2	2601.63	0.904535	1528	1671	1798	1386	6038	5491	5400	4824	932	1568	1208	1236	3411	1573	1206	1705	2560.94
523	355637	0.00267199	0.0105751	24	12	1645.44	0.0515342	0.2387	24.4321	12	7256.5	0.00136191	0.00597961	24.2161	12.001	5830.49	1946.08	0.333777	4625	4260	3979	3964	7451	6504	6682	6069	6694	8324	7770	6238	5833	6622	4593	3901	5844.31
664	3-aminoisobutyric acid	0.00267199	0.0105751	18	9	677.232	0.184497	0.501713	20	5.99998	2216.5	0.00424701	0.015432	19	7.59999	1560.32	698.862	0.447897	535	470	1016	1282	2464	1966	1905	2531	1018	1586	1432	2028	1756	778	554	1446	1422.94
675	adenosine-5-monophosphate	0.00267199	0.0105751	24	6	93.5149	0.0660698	0.274912	20	5.99998	532.75	0.00170217	0.00713897	22	6.04999	380.55	127.763	0.335731	364	359	348	348	618	578	486	449	252	309	324	304	200	339	237	447	372.625
744	ile-ile	0.00267199	0.0105751	24	12	17931.9	0.0807156	0.298914	24.2975	12	85002.2	0.00203632	0.00829283	24.1488	12.0004	67827.3	22708	0.334791	55297	49503	46500	46301	96318	65213	71760	73051	70493	100224	88960	80332	70157	71991	54358	46554	67938.2
825	tetracosanol	0.00267199	0.0105751	24	0	291.328	0.353662	0.743484	25.4179	6.63e-05	1105.75	0.00752617	0.0240324	24.7089	3.22e-05	567.852	524.135	0.923013	998	751	630	2044	425	229	312	310	207	93	299	168	401	189	420	1430	556.625
838	uridine	0.00267199	0.0105751	18	12	5715.9	0.0475932	0.229263	24.0327	12	69372	0.00126787	0.00571259	21.0163	12.2524	62019.2	11126.1	0.179397	55800	62855	49612	52833	73378	65407	65519	64976	67101	71417	75049	63921	53795	55279	55564	45961	61154.2
794	panose	0.00344533	0.013572	18	9	1271.02	0.0199098	0.211033	20	6	3856.75	0.000726242	0.00358025	19	7.6	1425.64	1785.32	1.25229	130	120	125	88	4117	2622	4378	4310	235	229	158	114	125	97	176	171	1074.69
10	1702	0.00421867	0.0149426	24	12	28678.7	0.42418	0.82966	24.4321	12	123611	0.0131094	0.0374617	24.2161	12.001	90980.8	41973.8	0.461348	60171	51784	57873	52489	166765	81499	87416	88679	92399	185413	107215	109417	137721	75335	53553	52734	91278.9
108	16645	0.00421867	0.0149426	18	9	124.804	0.426872	0.831254	24.5682	6	580.25	0.0131812	0.0375397	21.2841	7.92001	493.033	94.8332	0.192346	420	347	323	413	501	596	627	597	364	588	573	526	319	500	522	491	481.688
110	16707	0.00421867	0.0149426	18	9	3388.1	0.0159789	0.211033	20	5.99999	13208.2	0.000714861	0.00354487	19	7.6	5434.88	6107.64	1.12379	908	693	753	765	14347	13562	13833	11091	2813	2428	2290	674	854	1097	891	749	4234.25
130	18266	0.00421867	0.0149426	24	9	425.325	0.111416	0.35368	24.8451	6.00002	2197.25	0.0040717	0.0149237	24.4225	7.52821	1766.57	451.886	0.255798	1827	1223	1655	2072	1909	2415	2374	2091	1859	1788	1654	2468	1558	1356	1177	970	1774.75
148	31695	0.00421867	0.0149426	24	0	178.014	0.146451	0.424255	23.6461	6.63e-05	711.749	0.00518315	0.0180554	23.8231	3.34e-05	601.208	240.112	0.399383	644	676	819	708	424	460	552	611	431	449	427	411	843	579	575	1033	602.625
192	64643	0.00421867	0.0149426	24	15	1249.46	0.193589	0.523062	23.3952	12	6652.25	0.00662354	0.0218202	23.6976	13.4831	5243.81	1790.91	0.341528	3922	4175	3740	3874	7535	4189	3800	5323	6038	7715	7087	5769	5999	5570	4649	4366	5234.44
221	95422	0.00421867	0.0149426	18	0	9515.54	0.268148	0.640364	23.6461	17.9999	18269	0.00880598	0.0270929	20.8231	18.337	12106.7	9161.15	0.756704	18215	20428	25273	22054	8166	2734	783	6233	4539	8521	9635	14415	7974	8663	36642	19797	13379.5
251	106385	0.00421867	0.0149426	24	9	1438.79	0.0858792	0.307254	20	6	4710.25	0.00323279	0.0122208	22	7.425	2572.9	1853.91	0.720551	1163	1622	1130	1713	5442	4379	5815	3205	5039	1710	1838	1040	1129	1337	1043	1072	2417.31
268	110134	0.00421867	0.0149426	18	9	7147.44	0.206037	0.544937	23.3952	5.99999	66066.2	0.00699527	0.0228566	20.6976	7.82848	59524.7	7609.28	0.127834	60125	51313	47262	47812	67713	63253	71843	61456	61386	60852	65673	57767	45594	62283	56428	54279	58439.9
280	110962	0.00421867	0.0149426	24	9	599.98	0.160168	0.450073	20	6.00001	3432.75	0.00560813	0.0192181	22	7.42501	2073.89	1059.21	0.510733	1686	1440	1393	777	2368	3642	5310	2411	1668	1662	1787	1963	1146	2019	1171	1317	1985
302	118602	0.00421867	0.0149426	18	9	1352.7	0.0993873	0.340583	20	5.99998	6552.5	0.00368002	0.0136664	19	7.59999	3901.77	2178.3	0.558284	3007	1657	2786	1508	3909	8483	8830	4988	3502	2247	2868	2969	1846	3397	1668	1912	3473.56
311	120929	0.00421867	0.0149426	24	12	248.548	0.472434	0.884408	24.0327	12	1585.5	0.014386	0.0402903	24.0163	12	1209.17	491.071	0.406121	828	621	1052	817	2169	1198	1164	999	1118	2477	1373	1374	1234	1087	890	950	1209.44
442	223087	0.00421867	0.0149426	18	9	2804.03	0.337054	0.730428	20	5.99999	7023.25	0.0107437	0.0318905	19	7.59999	5076.91	2320.84	0.457136	2069	2249	1895	2507	6528	5823	9692	6050	6271	5845	2019	6727	4823	5717	2639	3077	4620.69
481	232329	0.00421867	0.0149426	24	9	1272.79	0.233901	0.589079	23.52	6	15813.8	0.00781614	0.0248642	23.76	7.48561	13823.8	1625.22	0.117567	13387	11842	13540	15926	19430	14320	15598	13907	13687	14507	13446	13691	10966	12027	12161	12479	13807.1
511	345862	0.00421867	0.0149426	18	15	2355.73	0.0378582	0.221664	20	12	9038.75	0.00155593	0.00669209	19	13.6167	6095.34	3301.09	0.541575	6313	6178	4218	5124	4383	4365	3396	2774	9415	10332	9178	7230	6159	7026	6325	4598	6063.38
529	357025	0.00421867	0.0149426	24	12	1659.58	0.0303058	0.211033	24.0327	12	5318.75	0.00127398	0.00571259	24.0163	12	4025.57	1961.88	0.487353	2722	2742	2538	2933	6128	4815	5064	4111	5263	6023	5444	4545	4089	3238	2712	2059	4026.62
592	402267	0.00421867	0.0149426	24	12	16637.2	0.05288	0.241391	24.5682	12	89574.5	0.00209876	0.00846533	24.2841	12.0016	72782.2	21309.7	0.292788	64753	54581	50560	44897	80083	83753	78196	79542	86115	89328	104954	77901	64729	86930	62430	58952	72981.5
625	475521	0.00421867	0.0149426	24	12	1675.49	0.871466	1	24.5682	6	7444	0.0242858	0.0598623	24.2841	9.03634	5223.68	2774.48	0.531135	2727	2153	2352	2621	16986	3806	4018	4966	4347	12866	5121	5529	7522	3553	2566	3028	5260.06
666	3-phosphoglycerate	0.00421867	0.0149426	18	0	8060.66	0.0610472	0.261232	23.2718	17.9999	23139.2	0.00238592	0.00941287	20.6359	18.2985	16537.6	7722.67	0.466976	23346	23179	22937	23804	4789	10499	10045	14498	18066	13119	6680	19292	20197	19109	25292	27959	17675.7
[truncated: 610 more rows]

## Sheet: total TS
ID	CycID	JTK_pvalue	JTK_BH.Q	JTK_period	JTK_adjphase	JTK_amplitude	LS_pvalue	LS_BH.Q	LS_period	LS_adjphase	LS_amplitude	meta2d_pvalue	meta2d_BH.Q	meta2d_period	meta2d_phase	meta2d_Base	meta2d_AMP	meta2d_rAMP	0	0	0	6	6	6	6	12	12	12	12	18	18	18	18	TS
[truncated: 843 more rows]
