# Supplementary material for: The microbiome interacts with the circadian clock and dietary composition to regulate metabolite cycling in the Drosophila gut
Source: eLife journal article supplement (doi:10.7554/elife.97130), 2024-05-01
Supplement: supp1 [file Table5-Lipids-AM versus AS.xlsx]

## Sheet: unique cycling in AM
ID	CycID	JTK_pvalue	JTK_BH.Q	JTK_period	JTK_adjphase	JTK_amplitude	LS_pvalue	LS_BH.Q	LS_period	LS_adjphase	LS_amplitude	meta2d_pvalue	meta2d_BH.Q	meta2d_period	meta2d_phase	meta2d_Base	meta2d_AMP	meta2d_rAMP	X0	X0.1	X0.2	X0.3	X6	X6.1	X6.2	X6.3	X12	X12.1	X12.2	X12.3	X18	X18.1	X18.2	X18.3	AM
2	CAR 14:0	8.77e-05	0.00272746	18	6	2.00133e+06	0.697974	1	20	6.00001	5.70422e+06	0.000654976	0.0120569	19	6.01667	4.34597e+06	1.39568e+06	0.321144	3940433	3016788	2805777	3952586	5771166	5612753	5960759	5472200	2258255	2353122	2243468	2535519	7881845	4778861	3673048	4572899	4.17684e+06
4	CAR 16:0	4.22e-05	0.00200244	18	6	1.16125e+06	0.646356	1	20	5.99998	3656385	0.0003138	0.00805876	19	6.01666	2.8926e+06	809573	0.279878	2730163	2047719	1958859	2490589	3529965	3711765	3750841	3632969	1911951	1853706	1877570	1846296	4221088	3279366	2695978	3173041	2.79449e+06
6	CAR 18:0	0.0419656	0.142411	18	3	45016	0.306628	1	27.3065	4.46e-05	1.3316e+06	0.0688818	0.276878	22.6533	1.88779	1.36091e+06	221413	0.162695	1387825	1449404	1231878	1257300	1233166	1336797	1112474	1459076	1472173	1105628	1233275	1180949	1615788	1580595	1658473	1546711	1.36634e+06
7	CAR 18:1	0.00267199	0.0224826	18	6	910975	0.89078	1	20	6	3.05213e+06	0.0167577	0.104245	19	6.01667	2.40448e+06	731894	0.304387	2245350	1590893	1573395	1631397	2825029	3119425	2961293	3302791	1512015	1537786	1638413	1759323	3493959	2784467	2209910	2867201	2.31579e+06
9	CAR 19:0	0.000171384	0.00408964	18	0	20916.6	0.0639924	1	20	17.9999	103100	0.00013622	0.00491483	19	18.05	86112.3	21766.2	0.252765	115749	130161	100449	94566	63029	65619	58501	68141	93658	80813	84232	86148	86935	114980	107682	102802	90841.6
11	CAR 21:0	0.000572095	0.00854353	24	21	23198.1	0.0614896	1	23.1496	17.9999	87363.9	0.00039593	0.00915716	23.5748	19.4792	70456.7	25054.6	0.355602	92836	90409	67667	99483	53361	41267	58034	36773	66976	58295	60449	59740	95083	85879	104025	64469	70921.6
20	Cer 34:3;2O|Cer 14:2;2O/20:1	0.00164724	0.0165458	18	3	320745	0.171988	1	24.0327	7.12e-05	4.23071e+06	0.00259763	0.0277614	21.0163	1.75139	3.99381e+06	614817	0.153942	4425993	4247042	3807739	4442067	3563359	3896711	4051853	3892661	3371558	3614512	3712016	3547873	5035654	4127049	4126460	4800886	4.04146e+06
43	CL 66:5|CL 32:2_34:3	0.00980952	0.0546185	18	6	77988.2	0.980392	1	20	5.99999	1068437	0.0542813	0.233151	19	6.01666	1.02136e+06	53247.5	0.0521339	923769	964615	948397	1028525	1133359	1032541	1105041	1002807	908146	840727	1021547	883494	1049098	1100045	1225021	1071376	1.01491e+06
52	DG 34:3	0.000987235	0.0119368	18	3	59963.2	0.251623	1	24.4321	6.03e-05	344806	0.00231032	0.0257788	21.2161	1.76803	319648	105204	0.329125	311944	368120	353468	345692	364778	361739	260694	236486	316849	252727	222565	190510	413907	371780	436949	423561	326986
54	DG 36:3	0.0419656	0.142411	18	3	35629.7	0.711783	1	28	6	451218	0.134742	0.431186	23	4.38095	445421	40620.4	0.0911954	395610	453151	374597	416333	454728	416529	472414	461199	436708	359906	356380	340048	591088	524604	546711	517532	444846
55	DG 36:4 Isomer A	0.00421867	0.0314483	18	3	59445.1	0.452777	1	20	4.19e-05	311530	0.0138686	0.0911768	19	1.58335	292760	78506.1	0.268159	308703	341348	341014	255055	307962	313556	207376	381547	208552	242208	194044	257113	349931	388178	428117	372485	306074
60	FA 14:0 (myristic acid)	0.0419656	0.142411	18	6	950847	0.985821	1	20	5.99998	4.90589e+06	0.173143	0.507063	19	6.01666	4.20892e+06	745353	0.177089	4031177	3593761	3351867	3492400	5451627	5835250	4042740	4293932	2202544	3479005	4095201	2486276	6914496	4593323	3411962	4622053	4.1186e+06
61	FA 14:1 (physeteric acid)	0.000572095	0.00854353	18	6	4.69496e+06	0.511593	1	20	6.00001	1.59298e+07	0.00267405	0.0280976	19	6.01667	1.14207e+07	4.81175e+06	0.421319	9638000	7502702	7484727	7799657	15792177	19991596	15561125	12374145	4318898	8915368	8322693	6465040	14390965	13659652	9236275	11948579	1.08376e+07
62	FA 14:1;O	0.00980952	0.0546185	18	6	727030	0.264	1	20	6.00001	3317471	0.0180146	0.108811	19	6.01667	2.63102e+06	785331	0.29849	2095343	2019654	1629077	2217231	3454229	3301192	3476929	3037534	2022417	2578043	2133953	2322478	2569794	2425342	2699946	2590452	2.53585e+06
64	FA 16:0 (palmitic acid)	8.77e-05	0.00272746	18	6	1.70931e+06	0.113991	1	20	6	6.3274e+06	0.000125082	0.00482126	19	6.01667	4.67502e+06	1.7097e+06	0.365709	3550740	3395893	3533517	4330930	5843250	7231788	5810934	6423647	3030821	3423629	3905290	3232282	4864790	4877388	4037079	3993498	4.46784e+06
65	FA 16:1 (palmitoleic acid)	0.00267199	0.0224826	18	6	3.22422e+06	0.518128	1	20	6	1.43753e+07	0.0104974	0.0741567	19	6.01667	1.08883e+07	3.8452e+06	0.353149	9824685	7572342	8189672	6566429	13577740	18979417	11614920	13329009	6999707	9192061	9854897	7552886	12364406	10492192	9569671	11077966	10422375
66	FA 18:0 (stearic acid)	0.00164724	0.0165458	18	6	3.0935e+06	0.0632044	1	20	6.00001	9.78605e+06	0.00105883	0.0162981	19	6.01667	7.04303e+06	2.53679e+06	0.360185	4184109	8572615	6170939	6683517	9317728	11516376	8749269	9560816	3623353	4956760	4281334	4780661	6474280	6640545	5529675	6727899	6.73562e+06
67	FA 18:0;(2OH)	0.000171384	0.00408964	18	6	278833	0.529942	1	20	6	1.19057e+06	0.000936082	0.0152097	19	6.01667	853713	362136	0.424189	569480	567604	546698	736818	1701717	977099	1185736	897723	514564	729945	421100	639645	877470	798925	884029	908710	809829
68	FA 18:1 (oleic acid)	0.000987235	0.0119368	18	6	1.09459e+07	0.185286	1	20	6	3.04187e+07	0.00175722	0.0221371	19	6.01667	2.03845e+07	1.07994e+07	0.529784	13042698	14847169	12422836	12096857	31253981	33310259	27658258	29452448	9088962	12793364	18246408	12464052	25047566	18639601	16876316	17971929	19075794
69	FA 18:2 (linoleic acid)	8.77e-05	0.00272746	18	6	9.18227e+06	0.360412	1	20	6	2.87854e+07	0.000359097	0.00861451	19	6.01667	1.89384e+07	1.05276e+07	0.555888	12702134	11657065	12919207	9893413	29809929	36730683	22021218	26579948	7412386	10504216	13798688	9505819	25457659	20177640	15244463	18188646	1.76627e+07
70	FA 18:2;O	2.22e-07	6.26e-05	18	6	841431	0.151398	1	20	6.00001	2.07646e+06	6.12e-07	0.000177483	19	6.01667	1.23797e+06	870253	0.702969	741801	614220	772177	742026	2396983	2349901	1664887	1894066	413599	499239	554650	450610	1338613	1153725	1332766	1200896	1.13251e+06
71	FA 18:3 (linolenic acid)	8.77e-05	0.00272746	18	6	371418	0.443754	1	20	6.00001	1.37161e+06	0.000434041	0.00978285	19	6.01667	969062	422540	0.43603	847391	662757	687551	587169	1405762	1828635	981355	1270697	467420	540938	745892	505804	1185127	994021	977755	997466	917859
74	FA 20:1 (eicosenoic acid)	8.77e-05	0.00272746	18	6	135477	0.312526	1	20	6	438976	0.000315293	0.00805876	19	6.01667	296652	150982	0.508951	181410	249907	193280	168963	379767	587341	364329	424466	129025	189228	216916	174401	358420	259055	269399	307795	278356
76	FA 22:0;O	0.0299489	0.115346	18	0	1.14284e+06	0.809991	1	20	17.9999	1.04219e+07	0.114475	0.391123	19	18.05	1.01688e+07	1.12713e+06	0.110843	13957337	10098571	10565888	13388897	8850312	9706396	8506575	8676493	10097997	11931060	9780687	9371012	9597010	9247953	11504358	11338293	1.04137e+07
80	FA 24:0;O	0.0144977	0.0712252	18	6	904943	0.241401	1	20	6	4.33262e+06	0.0232911	0.130976	19	6.01667	3.41335e+06	961660	0.281735	3237713	2544801	2328614	3298060	4753433	4973937	3707489	3895606	2356282	3316608	2607708	2947378	3397502	2721899	3034025	3628022	3.29682e+06
101	LPC 12:0	0.0210199	0.0924874	18	6	1.80005e+06	0.70351	1	20	6	5.72119e+06	0.0771024	0.297971	19	6.01667	4.42657e+06	1.14379e+06	0.258392	5246588	5086002	2584597	3417323	5840108	5150262	8708637	3185763	1414338	2363717	2018297	1234746	8987642	4687958	3622159	5059234	4.28796e+06
102	LPC 14:0	0.000987235	0.0119368	18	6	6.24351e+06	0.567468	1	20	6	15724005	0.00475472	0.0417062	19	6.01667	1.0992e+07	4.50424e+06	0.409776	11800520	11755881	6091305	6075650	17337032	16769033	19759295	9030660	2617066	3913814	4184931	2376581	22539098	12231702	8801865	11853692	1.04461e+07
103	LPC 14:1/0:0	0.00421867	0.0314483	18	6	519181	0.486728	1	20	6	1.72421e+06	0.01476	0.0956182	19	6.01667	1.31526e+06	366775	0.278861	1401147	1481331	806079	1089141	1814505	1661270	2345156	1075926	460386	658044	548238	388475	2409865	1457902	1168332	1567221	1.27081e+06
105	LPC 16:1	0.00421867	0.0314483	18	3	3.75184e+07	0.826989	1	20	6	102216442	0.0232291	0.130946	19	4.43333	9.0968e+07	5.48838e+07	0.60333	107318601	119057103	59481439	48943221	74952156	200571432	86881709	46460471	28236866	47622871	19458307	24327895	197766149	126417508	121847924	134455078	9.02374e+07
106	LPC 17:1	0.000320124	0.0059414	18	6	120159	0.419052	1	20	5.99998	365180	0.00133029	0.0189712	19	6.01666	233917	131993	0.564271	210873	200229	114797	134651	396476	388045	463450	212748	92270	114034	110470	89582	419001	193749	141221	205155	217922
110	LPC 18:2	0.000171384	0.00408964	18	6	5.06573e+07	0.318247	1	20	6.00002	1.21461e+08	0.000589961	0.0115183	19	6.01667	7.02713e+07	5.15026e+07	0.73291	60239740	59196768	24520265	29631659	124722687	133645663	154410718	73065431	12976110	26019822	24087974	12794254	128844139	68041397	35996538	56290374	6.40302e+07
111	LPC 18:3	0.000987235	0.0119368	18	6	1.10906e+06	0.601052	1	20	6	2.59088e+06	0.005002	0.0432165	19	6.01667	1.78585e+06	779201	0.436319	1857804	1850709	910268	953960	2725346	2868888	3133342	1635937	413960	596158	602869	359450	3871081	1933430	1446729	1902883	1.69143e+06
114	LPC O-18:0	0.0299489	0.115346	24	18	20822.4	0.278804	1	20.2759	17.9999	179030	0.0483084	0.217395	22.1379	18.1282	161642	15912.1	0.0984403	155712	164473	148282	175091	138955	126620	154814	114862	136023	201975	204810	167366	174733	175324	159606	206459	162819
115	LPE 12:0	0.000171384	0.00408964	18	6	576216	0.395559	1	20	6	1.66985e+06	0.000718537	0.0127684	19	6.01667	1.27809e+06	377952	0.295717	1339043	1251159	824070	924871	1875563	1713163	1750498	1340174	498681	767494	646226	519371	1967894	1401185	1491713	1405459	1.23229e+06
116	LPE 14:0	7.77e-06	0.000673899	18	6	1.2872e+06	0.257431	1	20	6	4.14853e+06	2.82e-05	0.00190146	19	6.01667	2.73566e+06	1.45148e+06	0.530576	2271581	2016471	1762479	1539674	5026704	4859465	3415351	3292582	1238645	1472103	1671100	1112806	3660336	2929592	2286624	2400772	2.55977e+06
117	LPE 16:0	0.0065055	0.0420944	18	9	4.80173e+06	0.337683	1	25.1282	6	2.03573e+07	0.0156429	0.0993652	21.5641	7.96551	1.71365e+07	3.72409e+06	0.217319	14881577	9853839	13171920	11526761	23066126	21218605	16230923	20913683	18082724	18749479	23266024	12942712	14049437	16084278	15811232	17890410	1.67337e+07
118	LPE 16:1	2.89e-06	0.000406746	18	6	5.86381e+07	0.285042	1	20	6	1.82967e+08	1.23e-05	0.00118491	19	6.01667	1.29068e+08	5.35926e+07	0.415226	128653776	107875265	83569878	82636875	208900732	215079177	161701802	146186011	52660429	73137103	65054923	51506717	169985489	142201567	142846763	129188820	1.22574e+08
122	LPE 18:1	8.88e-07	0.000200244	18	3	8.25889e+06	0.0601737	1	20	4.48e-05	2.32438e+07	9.48e-07	0.000203633	19	1.58335	1.65377e+07	1.41325e+07	0.854561	25050848	28011807	20526148	19386676	16021381	17223601	15192574	11407164	5287074	5232120	5815318	5800453	40681727	30673506	30590963	26050395	1.89345e+07
123	LPE 18:2	8.88e-07	0.000200244	18	3	6.1351e+06	0.0701278	1	20	4.94e-05	1.63809e+07	1.1e-06	0.000213193	19	1.58336	1.17525e+07	1.01459e+07	0.863297	18572565	20804895	13597182	12549057	11492365	12475460	11221688	7784783	3379691	3729138	4239243	3942689	28835677	21713926	21107236	20125299	1.34732e+07
124	LPE 18:3	7.77e-06	0.000673899	18	6	2.77726e+06	0.348018	1	20	6	7.77634e+06	3.74e-05	0.00234099	19	6.01667	5.19763e+06	2.55015e+06	0.490637	4744208	4305429	3329317	3188496	9598250	9387560	6074120	6045435	1704355	2196539	2067730	1803632	8431414	5990729	4828302	4522181	4.88861e+06
127	LPE 20:2	8.77e-05	0.00272746	18	6	694351	0.172913	1	20	6.00001	2.03604e+06	0.000183419	0.0058668	19	6.01667	1.39483e+06	626244	0.448974	1306804	1238525	893647	1015488	2427728	2290808	1719420	1706197	628612	736148	725547	650305	1921650	1433903	1217187	1191135	1318944
133	LPE-N (FA)33:1|LPE-N (FA 16:0)17:1	0.0299489	0.115346	18	15	170667	0.0608538	1	20	12	2.13665e+06	0.0133181	0.0885906	19	13.6167	1.82758e+06	302351	0.165438	1774675	1842485	1585113	1753098	1686172	1828838	1548078	1634021	2209037	2039253	2227619	2070685	1583291	1806931	1869485	1735707	1.82466e+06
134	LPG 18:1	0.000171384	0.00408964	18	6	225525	0.674772	1	20	6.00002	529797	0.00116397	0.0174402	19	6.01667	368884	166757	0.452058	348508	312670	156196	176449	581444	608445	619484	309814	44303	126996	109288	76927	607913	521542	454988	523861	348677
135	LPG 18:2	0.000171384	0.00408964	18	6	231372	0.408997	1	20	6	722877	0.000740605	0.0129104	19	6.01667	409539	334458	0.816669	236837	238238	123083	126640	789564	832637	869572	399735	79590	177336	145667	65462	627267	462456	325818	404251	369010
136	LPI 16:1	7.77e-06	0.000673899	18	6	1.0149e+06	0.223149	1	20	6	3.28151e+06	2.47e-05	0.00174297	19	6.01667	2.30334e+06	1.03972e+06	0.451399	1894657	1600457	1409141	1547929	3686376	3372525	3242624	2824513	1312257	1470053	1527117	1430809	2588495	2343545	2367368	2219639	2.17734e+06
137	LPI 18:0	1.91e-05	0.00111825	18	15	912669	0.149434	1	20	12	5.07065e+06	3.93e-05	0.00239315	19	13.6167	3.8125e+06	1.51088e+06	0.396297	4112482	3702499	3603431	3807725	2870843	2866017	2346805	3277901	6346815	4701962	5104719	4129117	3017100	3612007	3608012	3658393	3.79786e+06
138	LPI 18:1	0.00421867	0.0314483	18	9	1.71357e+06	0.0682349	1	20	6.00001	9350523	0.0026348	0.0278742	19	7.60001	6.51112e+06	2.27985e+06	0.350148	4941145	3709612	4030932	3793084	9812507	9905480	8391975	9292130	5000832	5276689	5704326	4847460	6048335	5648838	5132698	5471156	6.06295e+06
139	LPI 18:2	0.00164724	0.0165458	18	6	945622	0.315021	1	20	6	3463443	0.00444388	0.0395378	19	6.01667	2.23635e+06	1.3085e+06	0.585104	1599103	1411246	1214079	1305585	4011051	4264047	3131710	2446964	1071282	1380071	1354620	1451732	3237276	2276875	1526061	1562858	2077785
142	LPS 18:2	0.0144977	0.0712252	18	6	143864	0.574515	1	20	6	522178	0.0482091	0.217395	19	6.01667	341352	191918	0.562228	286313	251394	150039	175480	595235	672533	487283	333660	151367	195702	226546	176230	596878	344730	212851	233288	318096
146	PC 26:0	0.0419656	0.142411	24	15	471887	0.18883	1	20.9501	12	5.293e+06	0.0462609	0.211983	22.4751	13.4602	4.75069e+06	633971	0.133448	4546318	4709130	4016841	4254475	4502164	4833063	3826552	4532194	4754810	5112994	5627629	5676568	4688836	4811761	4505102	5383001	4.73634e+06
147	PC 26:0|PC 12:0_14:0	0.0144977	0.0712252	24	12	134590	0.405022	1	22.6735	12	1.35373e+06	0.0360392	0.177249	23.3368	12.0097	1.16314e+06	180595	0.155266	1079663	994557	861414	1032947	1228501	1265030	763178	1277997	1050973	1551575	1461880	1350487	1173963	1083565	1161491	1211586	1.1593e+06
149	PC 28:0	0.0144977	0.0712252	24	12	2.98946e+06	0.140706	1	23.52	12	2.11691e+07	0.0146769	0.0952413	23.76	12.0012	1.83105e+07	3.63543e+06	0.198543	15757650	16811076	14470978	15899127	21328447	21560303	14565204	19985741	18985544	22373107	23332444	19985463	15817775	17243821	16194512	18203506	1.82822e+07
159	PC 31:0	0.0419656	0.142411	18	12	5.68335e+06	0.0545084	1	20	12	5.32428e+07	0.016196	0.102446	19	12.0333	4.71012e+07	6.59349e+06	0.139985	45293440	40070994	45845452	45406332	44515648	46043012	42671968	45714011	54155653	54055434	51587177	53172866	41446042	43491986	41249373	46437899	4.63223e+07
160	PC 31:1	0.0210199	0.0924874	18	12	1.3977e+06	0.346431	1	20	12	1.62041e+07	0.0431262	0.202182	19	12.0333	1.43572e+07	2.08817e+06	0.145444	13940937	13023617	12939236	14092838	12679844	14836130	13215499	14902902	15551938	15002015	18346592	15915844	10689935	13187974	12497664	14945377	1.41105e+07
165	PC 33:1	0.0065055	0.0420944	24	12	491324	0.0784384	1	20	12	6.15034e+06	0.00437849	0.0391805	22	12.1	5.46274e+06	792211	0.145021	4965244	4969711	5147301	5287989	5627125	5662314	4894725	5432849	6001441	5955023	6079958	6564955	5294643	5252495	4481111	5039224	5.41601e+06
168	PC 33:2	0.0299489	0.115346	24	12	439128	0.252735	1	22.9091	12	4.05621e+06	0.0445344	0.207059	23.4545	12.0065	3.56638e+06	568144	0.159306	3323786	3748028	2766264	2701867	3689133	3834172	3052023	4026330	3737390	4040974	4481112	3965383	3108144	3511395	3154320	3762072	3.5564e+06
178	PC 35:1 Isomer B	0.00267199	0.0224826	18	0	403077	0.0502326	1	24.2975	17.9999	2.46e+06	0.00133094	0.0189712	21.1488	18.408	2.23822e+06	353888	0.158111	2657980	2733998	2572333	2511811	1994163	2011426	2045666	1977539	2418681	1869279	1756861	2125279	2505530	2268899	2417860	2647719	2282189
181	PC 35:2 Isomer B	0.0065055	0.0420944	18	12	306350	0.147791	1	23.1496	12	3.73496e+06	0.00764073	0.0590063	20.5748	12.1909	3.38566e+06	471349	0.139219	3209252	2913406	3167241	3290646	3807880	3673952	3035133	3442135	3807977	3604911	3819606	3707363	2993039	3045034	2636328	3349979	3.34399e+06
182	PC 35:2 Isomer C	0.0144977	0.0712252	24	21	182790	0.13703	1	23.9024	17.9999	1.44486e+06	0.014346	0.093363	23.9512	19.497	1.30582e+06	197377	0.151152	1353333	1517595	1603269	1253026	1241444	1012206	1191237	1189355	1372883	1204566	1190303	990979	1381523	1536081	1376272	1485578	1.30623e+06
183	PC 35:3	0.00980952	0.0546185	18	12	187880	0.185526	1	20	12	1.24808e+06	0.0133017	0.0885906	19	12.0333	1.03518e+06	228015	0.220266	931150	964085	872751	889069	964363	1105674	662505	1143531	1173765	1156411	1418496	1243639	857712	988975	840100	919719	1.00825e+06
186	PC 36:2	0.0210199	0.0924874	24	15	4.90794e+06	0.266292	1	22.3291	12	9.73129e+07	0.0346225	0.173113	23.1646	13.4634	9.08964e+07	7.83304e+06	0.0861755	88063719	89683349	80971438	83076656	91714561	92467952	80555329	93662792	91460191	98712581	100611150	98467521	83424293	94099408	95644119	90010036	9.07891e+07
188	PC 36:3 Isomer B	0.0419656	0.142411	24	21	5.35904e+06	0.327789	1	23.7736	17.9999	2.06827e+08	0.0727174	0.287038	23.8868	19.4933	1.99975e+08	6.50664e+06	0.0325372	202314545	205387261	193956414	204565334	197885144	197862519	182531588	193524590	200977643	196152835	193453002	204195708	215536396	210185293	198688445	202897998	2.00007e+08
204	PC O-32:1	0.0299489	0.115346	24	9	17912.8	0.19395	1	24.1644	6.00001	86470.8	0.0357137	0.176417	24.0822	7.50521	71117.8	19121.7	0.268874	85747	66802	61442	35401	78375	93901	89472	84135	76810	85354	88541	74777	43416	45183	50827	78777	71185
217	PC P-36:4 or PC O-36:5	0.0419656	0.142411	24	0	31241	0.306233	1	22.1053	5.94e-05	146781	0.0688096	0.276834	23.0526	3.1e-05	120912	34663.9	0.286687	160430	103863	163413	159417	109753	97283	144898	112147	94079	104380	54238	104504	171115	99487	123630	150851	122093
225	PE 26:1|PE 12:0_14:1	0.0210199	0.0924874	24	12	234887	0.191064	1	24.1644	12	1427419	0.0261749	0.141376	24.0822	12.0001	1.20895e+06	290706	0.240462	1136145	979046	828587	986744	1387254	1359410	970060	1564502	1354814	1388249	1623286	1343327	838329	1167712	1331662	1096553	1209730
227	PE 28:1|PE 12:0_16:1	0.00421867	0.0314483	18	15	112388	0.134059	1	20	12	1072624	0.00479459	0.0419062	19	13.6167	921537	164871	0.178909	912719	910115	832197	887351	856615	853992	728302	796215	923848	1063342	1132269	1171037	806683	886863	893771	1063730	919941
228	PE 30:0;2O|PE 12:0_18:0;2O	0.0299489	0.115346	24	15	213206	0.165506	1	20.8511	12	1.82026e+06	0.0312621	0.160889	22.4255	13.461	1.49498e+06	396165	0.264997	1402962	1112689	1090267	1452601	1680425	1409396	975037	1483020	1838298	1994907	1637286	1810552	1274178	1394163	1622119	1594994	1.48581e+06
236	PE 32:3|PE 14:0_18:3	0.0144977	0.0712252	24	12	288588	0.143391	1	20.5594	12	2.0696e+06	0.0149176	0.0959751	22.2797	12.072	1.70699e+06	402841	0.235995	1493584	1309437	1434361	1487984	1936846	1503708	1422600	1908314	2188960	2222998	1822556	2043879	1157906	1489875	1862733	1691308	1.68607e+06
241	PE 34:3	0.0210199	0.0924874	18	12	2.48496e+06	0.708332	1	20	12	36346443	0.0775292	0.298342	19	12.0333	33217512	3.58759e+06	0.108003	33255877	33211574	31934811	33557246	27831191	34218859	30487813	33311678	35801923	37412832	36771767	35399250	25374679	32185358	31112266	32832009	3.27937e+07
249	PE 36:3	0.0419656	0.142411	24	0	348418	0.353442	1	24.7059	6.63e-05	3.10207e+06	0.0772908	0.298157	24.3529	3.27e-05	2.74156e+06	405821	0.148025	2897936	2778608	3447373	3284393	2451464	2387473	2813066	2303597	2725965	2223858	2108243	2897211	3282258	2627392	2537627	3026432	2737056
258	PE 38:3|PE 18:1_20:2	0.0419656	0.142411	18	15	139149	0.680805	1	20	12	1582076	0.130149	0.423501	19	13.6167	1.43897e+06	190505	0.13239	1435839	1408231	1430221	1573640	1177511	1348687	1207224	1487589	1700447	1501825	1610809	1515223	1162445	1395840	1529715	1508742	1.43712e+06
289	PE P-40:5 or PE O-40:6	0.00980952	0.0546185	18	0	46786.3	0.279051	1	24.2975	17.9999	252989	0.0188898	0.111857	21.1488	18.408	229273	41376	0.180466	266009	262279	264064	305287	192291	196267	231172	170540	186296	218603	204318	241526	331679	230448	238710	211119	234413
290	PE-Cer 28:1;2O	0.0210199	0.0924874	24	12	79352.8	0.219726	1	26.1721	6.00003	723076	0.0294559	0.154462	25.0861	9.14704	655156	89544.4	0.136676	590886	489082	446690	620279	826982	757514	651382	656424	707801	710735	771279	684248	598586	620120	715695	705892	659600
332	PI 28:0|PI 14:0_14:0	0.0065055	0.0420944	18	9	867960	0.201724	1	23.9024	6	5.13357e+06	0.0100208	0.0720792	20.9512	7.8674	4.40521e+06	934524	0.212141	3663086	3503532	2812027	3856553	6791940	5352039	3991484	4398802	4400827	5087900	4934332	4627462	3716690	3589340	3560295	4210523	4281052
334	PI 30:0|PI 14:0_16:0	0.00980952	0.0546185	24	12	792327	0.190392	1	23.9024	12	4.21056e+06	0.0136023	0.0896876	23.9512	12	3.37508e+06	1.04859e+06	0.310687	3009194	2246624	2342050	2628005	4840255	3100039	3388609	3423094	4636529	5059614	3336280	3809804	2453134	2562453	3913723	3225102	3.37341e+06
352	PI 36:2	0.00980952	0.0546185	24	0	413871	0.235597	1	23.6461	6.63e-05	6.29768e+06	0.0163395	0.102634	23.8231	3.34e-05	5.96298e+06	501985	0.0841835	5720517	6380003	6770610	6319598	6086552	5704931	5538707	5799367	6118540	5521157	5362468	5340755	6272192	6481776	5881612	6156325	5.96594e+06
356	PI 36:4	0.00164724	0.0165458	24	0	709388	0.111901	1	24.4321	6.63e-05	6.40448e+06	0.00176932	0.0221657	24.2161	3.29e-05	5.6676e+06	847848	0.149596	6421282	6668217	6205089	6323354	5083488	6120492	5477631	4974911	5396789	4897456	4309220	5338948	6284129	4992733	5899029	6195200	5661748
375	PS 34:3|PS 16:1_18:2	0.00980952	0.0546185	24	12	211217	0.12018	1	22.4427	12	2.03922e+06	0.00912851	0.0671608	23.2214	12.0135	1.81563e+06	271477	0.149522	1749075	1633585	1381364	1774791	1985829	1810358	1643422	2016400	2050910	2095133	2041394	1969445	1558356	1657171	1853407	1721487	1.80888e+06
388	SPB 14:0;2O	0.0299489	0.115346	18	6	165451	0.896662	1	20	6.00001	2728585	0.123994	0.412704	19	6.01667	2.54457e+06	184942	0.0726812	2435168	2505355	2446550	2411208	2827588	2608658	2882749	2595345	2784003	2428558	2271993	1978766	2486829	2300626	2580992	2810107	2.52216e+06
392	SPB 18:0;2O	8.77e-05	0.00272746	18	6	109178	0.460477	1	20	6.00001	829158	0.000448904	0.00997318	19	6.01667	730609	96929	0.132669	727077	681697	653253	659130	853537	928628	745495	788972	584367	618577	631369	533860	887787	712899	712004	783153	718863
393	ST 27:1;O;S	2.22e-07	6.26e-05	18	6	8.97935e+06	0.0716461	1	20	6	18927141	3.02e-07	0.000177483	19	6.01667	1.03933e+07	8.64893e+06	0.832161	6066002	5545080	6247032	5625785	19713190	21016733	15245389	19733252	2427707	3161056	3569509	2665636	10414777	9794253	8904869	9393949	9.34526e+06
397	TG 36:1|TG 10:0_12:0_14:1	0.0419656	0.142411	18	0	601662	0.300467	1	24.2975	17.9999	3.36253e+06	0.0677538	0.273808	21.1488	18.408	3.03297e+06	696849	0.229757	4815697	3750906	2983164	3811058	2160260	2316839	3160198	2141785	2273301	3110656	2791606	3147166	3118654	3284830	3052265	3994395	3.11955e+06
420	TG 46:4 Isomer A	0.0419656	0.142411	18	6	224311	0.719019	1	20	6	1.75258e+06	0.135807	0.433066	19	6.01667	1.5351e+06	204653	0.133316	1455664	1483426	1654045	1241598	1729553	2090297	1655831	1534634	1253739	1473155	1174076	1071642	1380148	1769449	1252334	1945153	1.5103e+06
425	TG 48:4 Isomer A	0.00421867	0.0314483	18	6	553388	0.55149	1	20	5.99999	4.11433e+06	0.0164333	0.10308	19	6.01666	3.61505e+06	561216	0.155245	3240451	3369177	2853680	3225039	4540326	3751253	4091469	4074255	3636527	3259406	3231985	2966908	3382109	3921615	3658511	3549920	3.54704e+06
426	TG 48:5	0.0299489	0.115346	18	6	61662.4	0.960903	1	20	6	362768	0.130887	0.424981	19	6.01667	301862	67327.7	0.223041	240726	311096	259630	182094	422596	448715	267154	312607	217639	285637	264521	187824	320478	312067	283472	383003	293704
432	TG 50:3 Isomer A	0.000987235	0.0119368	18	6	1.5091e+06	0.758963	1	20	6	1.02566e+07	0.00614136	0.0510083	19	6.01667	8.86732e+06	1.44635e+06	0.16311	9296042	7741548	7077417	7616654	12284061	10983462	7887542	9871205	7385776	7608414	7230909	6805688	8463335	9482555	9317257	10020957	8.69205e+06
434	TG 50:5	0.0299489	0.115346	18	9	153092	0.691529	1	20	6	1067387	0.101008	0.359546	19	7.6	909454	135707	0.149218	781396	672171	738314	674371	1251004	1150745	905785	962014	896325	833459	889776	736975	927200	930985	817794	956121	882777
440	TG 52:2	0.0419656	0.142411	18	6	376731	0.743898	1	20	5.99999	3.26404e+06	0.139444	0.441018	19	6.01666	2.82583e+06	434097	0.153618	2999150	2671245	2497821	2286933	4171900	3335902	2925155	2623196	2416940	2623565	2318451	2043156	2427465	2801892	2962665	3266161	2.77322e+06
441	TG 52:3	0.0210199	0.0924874	18	6	688639	0.811336	1	20	6	4.18647e+06	0.0864879	0.325865	19	6.01667	3.40404e+06	953891	0.280223	3062013	2433117	2072535	2311011	5174227	4580896	3627810	3362929	3028577	2982206	2868065	3108786	3473790	3330370	3680697	3518129	3.28845e+06
442	TG 52:4	0.00164724	0.0165458	18	6	782271	0.701824	1	20	6	4.19082e+06	0.00897429	0.066699	19	6.01667	3.44374e+06	832317	0.24169	3363460	2823792	2398547	2518560	4856563	4362799	3631057	3912850	2673012	2701391	2965246	2619942	3546553	3629204	3543364	3939756	3342881
443	TG 52:5	0.0299489	0.115346	18	6	247101	0.855088	1	20	6	1.54271e+06	0.119461	0.40446	19	6.01667	1.29957e+06	299138	0.230182	1196454	1116473	976989	718925	1897949	1480518	1329692	1462676	1352639	1251318	1076440	1074783	1339649	1379019	1299062	1260592	1.26332e+06
444	TG 52:6	0.00267199	0.0224826	18	6	50770.1	0.470725	1	20	6.00002	314320	0.00965771	0.0699138	19	6.01667	249420	73648.5	0.29528	231746	196655	156330	178422	368125	367743	271179	250233	216710	217395	224823	196026	246012	238935	236694	250889	240495
447	TG 54:1	0.0419656	0.142411	18	6	112062	0.283649	1	20	5.99999	767498	0.064647	0.265053	19	6.01666	647437	116186	0.179456	662923	654832	480960	609156	873580	846568	717478	632366	587204	576078	482716	497884	553614	647840	654466	656062	633358
448	TG 54:2	0.0419656	0.142411	18	6	151702	0.969047	1	20	6.00002	997968	0.170895	0.50441	19	6.01667	852455	174573	0.204788	786868	760008	633995	552019	1140261	1095830	987726	768054	744894	810359	738578	678899	863695	1005802	952879	780935	831300
449	TG 54:3	0.00164724	0.0165458	18	6	180711	0.473121	1	20	6.00001	1.13765e+06	0.00635716	0.0520341	19	6.01667	931085	211742	0.227415	923108	832309	802010	691693	1407240	1206079	1059118	878162	714364	839630	803761	622390	840982	867595	946796	1051580	905426
450	TG 54:4	0.00980952	0.0546185	18	6	289321	0.341011	1	20	6	1.25393e+06	0.0224134	0.12731	19	6.01666	915666	389727	0.425621	701728	563197	532967	569325	1521364	1366240	1209661	918470	765924	754792	677928	776840	916946	868216	847229	904193	868439
451	TG 54:5 Isomer A	0.00164724	0.0165458	18	6	302501	0.24786	1	20	5.99999	1.03811e+06	0.00359435	0.0344905	19	6.01666	756224	316593	0.41865	604882	548624	490200	395492	1121001	1119265	935821	976342	548459	536878	674932	562633	781685	720752	725832	742951	717859
452	TG 54:6 Isomer A	0.00267199	0.0224826	18	6	195571	0.0968682	1	20	6	569770	0.00239661	0.0262916	19	6.01667	356025	229366	0.644242	285926	232432	178979	137239	702478	601211	513088	462305	210560	240585	266872	223725	324882	318303	283487	269619	328231
454	TG 56:2	0.0144977	0.0712252	18	6	64230.6	0.26991	1	20	5.99999	420750	0.025605	0.139298	19	6.01666	359005	58857.9	0.163947	381015	368319	271360	328957	468799	458110	406125	349964	289228	331561	272873	279529	336234	370997	349551	367338	351872
456	TG 58:2	0.00421867	0.0314483	18	9	23881.5	0.24621	1	20	6.00002	82346.2	0.00817419	0.061959	19	7.60001	60689.2	24976.9	0.411554	53972	28646	37507	24018	92723	109929	69291	57442	46777	45658	59697	97614	41968	51987	41617	33623	55779.3
467	unkown1009	0.00421867	0.0314483	18	9	211846	0.461193	1	25.2722	5.99999	971242	0.0140905	0.0923666	21.6361	7.97739	789944	180711	0.228765	704323	504566	469123	504386	1184828	961741	858123	880274	807185	940492	739715	765696	709613	525282	969240	810477	770942
472	unkown1013	0.0144977	0.0712252	18	9	564433	0.93479	1	20	6	1.95663e+06	0.0718435	0.284723	19	7.6	1.5443e+06	370899	0.240172	944769	934065	931478	856700	2400714	2059008	1511986	1854830	1805314	1387665	1068970	1186388	1510116	1322907	1976113	1791236	1.47139e+06
481	unkown1023	0.00980952	0.0546185	18	9	67886.8	0.488393	1	26.3284	6	181893	0.0303793	0.157461	22.1642	8.06656	131917	49647	0.376351	66268	47835	60646	58768	206661	244726	154865	121321	156562	182084	85179	137995	134163	80754	140999	166227	127816
482	unkown1024	0.0299489	0.115346	18	6	221199	0.623998	1	20	6	824649	0.0930642	0.342122	19	6.01667	627606	186166	0.296629	791327	503275	327472	612012	1028994	884277	570192	815133	347662	501346	377456	295008	926306	750708	329611	619963	605046
494	unkown1039	8.77e-05	0.00272746	18	9	95015.9	0.263325	1	20	5.99999	388674	0.000269612	0.0073694	19	7.6	297580	96447.4	0.324106	216362	196981	146555	164361	522583	378915	350591	302606	271955	337800	250981	288232	254984	220573	241857	312595	278621
499	unkown1045	0.00421867	0.0314483	18	6	1.06002e+06	0.210097	1	20	6	3.28493e+06	0.00711584	0.0559102	19	6.01667	1.96579e+06	1.40299e+06	0.713702	1184533	847103	850348	1381283	4277483	3112635	3410075	2339514	858732	1208713	908731	1050990	2556740	1869802	1183530	1692266	1.79578e+06
502	unkown1048	0.000171384	0.00408964	18	9	84502.1	0.244389	1	20	6.00001	320081	0.000464104	0.0102103	19	7.60001	240973	86911.1	0.360667	137466	167356	131923	82855	417426	295193	282021	285683	249284	252025	196194	243560	205890	163996	204983	266360	223888
508	unkown1054	1.91e-05	0.00111825	18	6	206197	0.26943	1	20	6	732466	6.78e-05	0.003474	19	6.01667	512755	234062	0.456479	421070	331673	313250	362396	825941	856447	594959	652517	298561	330356	380595	292137	551120	490502	478668	570063	484391
509	unkown1055	0.00421867	0.0314483	18	6	105145	0.519963	1	20	6.00001	471104	0.015623	0.0993652	19	6.01667	353182	122695	0.347398	301354	293176	191399	331659	572266	527010	405843	379296	193694	291789	254955	257506	495679	315097	243943	358351	338314
510	unkown1056	0.00421867	0.0314483	18	9	45562.6	0.16342	1	20	6	211886	0.00570814	0.0478508	19	7.6	153803	49273.1	0.320366	95277	92826	143454	79571	186822	241835	210638	208247	93252	157142	151718	122795	113226	100673	162129	146264	144117
526	unkown1072	0.0144977	0.0712252	24	9	41758.9	0.192848	1	23.3952	6.00002	138103	0.0192344	0.113099	23.6976	7.48209	97572	46031.2	0.471767	106135	64861	39724	55269	175136	159111	112839	105326	106794	160456	88892	106410	100904	30332	49555	89901	96977.8
531	unkown1078	0.00421867	0.0314483	18	6	330635	0.0500401	1	20	5.99998	981480	0.0019977	0.0240257	19	6.01666	629703	340456	0.540661	534026	500311	312477	669221	1061567	957806	771186	1135363	321794	398148	358830	324539	591664	488468	392287	597462	588447
533	unkown108	0.000171384	0.00408964	18	6	388382	0.08815	1	20	6	951916	0.000182806	0.0058668	19	6.01667	557481	417216	0.748395	296950	242950	336387	319307	1104192	984876	792924	925674	255133	328558	261909	299474	591348	453241	418132	499716	506923
538	unkown1085	0.00421867	0.0314483	18	6	175771	0.628325	1	20	5.99999	832044	0.0183771	0.109943	19	6.01666	652051	205073	0.314505	551172	460224	424327	485837	995778	861507	701948	768941	507875	579703	509748	460375	613965	652538	764339	696931	627200
541	unkown1088	0.00164724	0.0165458	18	9	34371	0.124746	1	20	6	118697	0.0019501	0.0235789	19	7.6	72040.3	42983.3	0.596656	17898	19225	23610	70138	167261	98010	120947	88569	38078	88985	63186	50341	35844	62611	25061	47688	63590.8
548	unkown1096	0.0299489	0.115346	18	9	23786.4	0.812053	1	20	6.00001	75475.8	0.114705	0.391611	19	7.6	55875.3	17580.4	0.314636	25400	34413	21453	33317	89281	80334	64784	67504	72862	32884	37462	47587	48801	47281	69611	65736	52419.4
549	unkown1097	0.000572095	0.00854353	18	9	73864.7	0.232919	1	20	6	203351	0.00132229	0.0189712	19	7.6	134896	63397.2	0.469972	60880	40538	53782	62873	236244	190198	214214	172749	98904	122636	77740	152827	107968	156325	96825	114230	122433
550	unkown1098	0.000320124	0.0059414	18	9	123426	0.155631	1	20	6.00001	431677	0.000543405	0.0111583	19	7.60001	304054	131571	0.432723	177095	126862	114072	230777	570832	324156	455773	375947	243755	345441	234704	328676	226083	308897	172580	215397	278190
551	unkown11	0.00980952	0.0546185	18	15	1.67612e+07	0.375867	1	20	12	7.41227e+07	0.0243455	0.134557	19	13.6167	6.52615e+07	1.66669e+07	0.255386	76707829	76681127	52608166	81693428	53399764	50285811	46901133	48720660	81394078	76914692	66616249	71565623	66908321	69085196	56758153	65361568	6.51001e+07
552	unkown110	0.000320124	0.0059414	18	15	75964.5	0.211908	1	20	12	348907	0.000718963	0.0127684	19	13.6167	252879	115992	0.458687	245975	278037	254948	237787	120953	244869	147947	201852	438166	334352	352728	270383	202879	211079	224668	261464	251755
554	unkown1102	0.00421867	0.0314483	18	9	133961	0.0832215	1	20	5.99999	511873	0.00314378	0.0311614	19	7.59999	331277	138096	0.416861	232897	177184	178015	202418	644416	527401	447833	427842	214087	286814	215483	245589	280640	306623	212952	265887	304130
558	unkown1108	0.00164724	0.0165458	18	6	331077	0.283091	1	20	6	960736	0.00404329	0.0373834	19	6.01667	599377	377032	0.629039	457005	302035	245213	496094	1291147	998190	835266	718341	220783	449781	310648	282379	832590	641378	327141	451020	553688
559	unkown1109	0.0210199	0.0924874	18	15	66863.3	0.523555	1	20	12	297820	0.0606312	0.252922	19	13.6167	219502	102894	0.46876	198802	192275	255168	260192	174803	110525	159730	129448	428089	204205	187739	371246	201091	176151	216862	229768	218506
562	unkown1111	4.22e-05	0.00200244	18	6	808173	0.109417	1	20	5.99998	2.21787e+06	6.13e-05	0.00326421	19	6.01666	1.37922e+06	817819	0.592959	1324781	1004404	797166	995783	2530786	2474777	1529452	2336475	571510	646262	545777	407287	1747530	1333127	927631	1309070	1.28011e+06
567	unkown1116	0.0419656	0.142411	18	6	75820.4	0.989713	1	20	6.00001	598446	0.173663	0.507186	19	6.01667	548799	54794.6	0.0998446	545667	430847	527360	501655	644935	657511	531051	560285	420751	507963	551513	406434	520595	568692	634596	664687	542159
569	unkown1119	0.0419656	0.142411	18	15	57546.5	0.958852	1	20	12	241811	0.169523	0.502908	19	13.6167	199323	65311.5	0.327667	230225	257386	151482	267335	146521	164909	166037	161220	211616	267491	245557	242579	162387	167170	145643	191488	198690
572	unkown1121	0.00980952	0.0546185	18	15	133215	0.744993	1	20	12	675663	0.0432546	0.202574	19	13.6167	535958	181229	0.33814	624212	539924	414293	717221	524927	375760	433243	411887	787341	638636	587285	689390	398727	436745	489878	477774	534203
582	unkown1130	0.0299489	0.115346	24	18	493556	0.100206	1	20.464	12	3.89181e+06	0.0204336	0.118757	22.232	14.8554	3.32903e+06	705658	0.211971	3180767	2853273	2976415	3154228	2862037	2761109	2835185	3118886	4088276	4205052	3029387	4244532	3408925	3242857	3962321	3419366	3.33391e+06
593	unkown1141	0.000987235	0.0119368	18	6	287696	0.525851	1	20	6	903728	0.00444556	0.0395378	19	6.01667	667310	230548	0.345489	673103	667545	389585	458851	926276	863141	1215364	610133	213717	370655	334028	264404	1058139	628212	769123	787684	639372
600	unkown1149	0.00421867	0.0314483	18	6	84191.3	0.771194	1	20	5.99999	394094	0.0218891	0.124804	19	6.01666	319984	85160.8	0.266141	285167	260416	235806	203597	451065	390082	376478	358753	243351	303866	277847	215111	306791	319168	394875	332247	309664
610	unkown116	0.0065055	0.0420944	18	3	391179	0.316063	1	20	5.99999	861336	0.0147774	0.0956182	19	4.43333	761153	406706	0.534329	894532	879672	552325	616435	907645	901099	936381	700219	263027	338899	335431	279087	1014529	970939	1162775	1338833	755739
614	unkown1165	0.0419656	0.142411	18	6	116176	0.61901	1	20	6	453315	0.120808	0.405718	19	6.01667	351745	120889	0.343683	293580	181712	218653	270070	506936	469326	456696	380302	221615	360287	339865	280160	385368	351382	287424	390153	337096
616	unkown1167	0.00980952	0.0546185	18	6	134626	0.98916	1	20	6	757586	0.0546804	0.233974	19	6.01667	663416	110208	0.166121	633554	488777	521239	583547	788065	779979	719809	742489	559300	551187	587715	502209	636774	631869	905024	769440	650061
617	unkown1168	8.77e-05	0.00272746	18	6	765324	0.056936	1	20	6.00001	2.2662e+06	6.59e-05	0.00341835	19	6.01667	1.3968e+06	880641	0.63047	956648	1026910	794219	1053117	2526517	2508069	1813904	2216317	771682	745666	819922	717479	1533224	981283	910903	1265495	1.29008e+06
619	unkown117	0.000171384	0.00408964	18	6	517383	0.143203	1	20	6	1.52114e+06	0.000285066	0.0076985	19	6.01667	1.04222e+06	497432	0.477283	902180	772046	607002	726945	1470282	1516505	1716706	1381050	605636	791821	802444	445546	1252441	962816	809764	947830	981938
620	unkown1170	8.77e-05	0.00272746	18	6	270971	0.289973	1	20	6	816936	0.000294445	0.00781145	19	6.01667	567660	268436	0.472881	415214	334210	390468	384514	971359	802105	720849	773430	344495	396882	389534	292784	531410	494683	679289	640872	535131
621	unkown1171	0.000171384	0.00408964	18	6	297013	0.62372	1	20	6.00001	905723	0.00108431	0.0164655	19	6.01667	613153	303822	0.495507	540270	418775	353806	363525	745870	1276249	845660	755112	211829	259411	199780	426056	433968	626852	1048367	715847	576336
624	unkown1174	7.77e-06	0.000673899	18	6	1.01373e+06	0.0578487	1	20	5.99998	2.60741e+06	7.02e-06	0.000822217	19	6.01666	1.66041e+06	915832	0.55157	1411184	1312269	1152523	1309540	2952504	2421334	2270521	2785284	721749	873902	799881	541177	1660505	1311213	1321087	1946211	1.54943e+06
625	unkown1175	8.77e-05	0.00272746	18	6	180449	0.68285	1	20	5.99999	480182	0.000642095	0.0119171	19	6.01666	337747	146859	0.434819	315397	247401	182762	203131	445069	672533	408659	394465	110352	146248	100582	89064	596878	344574	498936	363154	319950
626	unkown1176	1.91e-05	0.00111825	18	6	1.06554e+06	0.461641	1	20	5.99999	3.02449e+06	0.000111398	0.00460297	19	6.01666	2.01372e+06	1.02195e+06	0.507491	1772625	1387112	1293766	1273025	2463338	4264047	2898662	2471907	822786	969650	687693	674431	1453645	2114520	3341293	2349632	1.88988e+06
628	unkown1178	0.000572095	0.00854353	18	6	63857.8	0.764112	1	20	6.00001	195894	0.00381856	0.0361801	19	6.01667	127328	73713.4	0.578927	93507	57008	68617	77287	165409	309493	173564	135108	31874	58748	31709	95577	108985	126559	206330	154545	118395
631	unkown1181	0.0419656	0.142411	18	15	118562	0.99084	1	20	12	529818	0.173814	0.507186	19	13.6167	468875	125685	0.268056	530920	622765	397770	648181	398341	330489	408937	357215	441290	594850	512020	571111	377354	416882	376787	497607	467657
650	unkown12	0.0065055	0.0420944	18	15	5.11235e+07	0.361431	1	20	12	2.20109e+08	0.0165832	0.103546	19	13.6167	1.94383e+08	4.93651e+07	0.253958	234500007	225746967	158000667	239901057	157823942	149519156	139329071	144774195	246877041	228014098	197767276	207777090	197439457	205597882	170358593	199055811	1.93905e+08
652	unkown1200	0.0210199	0.0924874	18	15	1.2697e+06	0.62177	1	20	12	7.13785e+06	0.0697582	0.278885	19	13.6167	6.18404e+06	1.44635e+06	0.233884	6429711	7438656	5045035	7197923	6257315	4568559	4460455	4849579	6775143	6744329	7782039	7249878	5992406	5720351	4925372	7283833	6.17004e+06
667	unkown1214	8.77e-05	0.00272746	18	6	437836	0.485988	1	20	5.99999	1743056	0.000471476	0.0102909	19	6.01666	1.13457e+06	614446	0.541569	825219	892372	700109	833641	1983189	2573855	1182563	1232617	528594	548747	608385	552142	1928031	993862	649230	929172	1060108
671	unkown122	0.00421867	0.0314483	18	6	159098	0.385437	1	20	6	940115	0.0120678	0.0822141	19	6.01667	778563	151933	0.195146	859023	593537	660737	791189	1164837	820425	783563	991634	607454	560455	518644	660508	711554	863982	901567	673326	760152
677	unkown1226	7.77e-06	0.000673899	18	6	161914	0.158895	1	20	6	345293	1.8e-05	0.00142668	19	6.01667	202080	152591	0.755103	111491	112149	104607	77414	361856	370158	297886	351271	67625	91874	109502	72912	229502	201065	174513	203595	183589
696	unkown1247	0.00980952	0.0546185	18	6	234759	0.80766	1	20	6	745398	0.0462532	0.211983	19	6.01667	516617	228755	0.442794	509564	343426	280797	426447	685424	1112611	559709	623846	60107	259246	367850	176130	1029476	689795	204864	493050	488896
697	unkown1249	0.0299489	0.115346	18	6	99684.7	0.720067	1	20	5.99997	409895	0.104304	0.365686	19	6.01665	306266	104749	0.34202	288016	243808	157655	304946	488909	486986	331235	332449	161842	198582	236708	173732	458243	409927	146757	277370	293573
698	unkown125	0.000572095	0.00854353	18	15	67636.5	0.287152	1	20	12	560254	0.00159579	0.0209751	19	13.6167	484323	97924.9	0.202189	510404	482899	453344	533540	445671	448595	396008	390656	537646	581481	572243	549644	387239	460597	463733	520300	483375
699	unkown1250	0.00267199	0.0224826	18	6	104213	0.528837	1	20	6.00001	385428	0.0106855	0.0747155	19	6.01667	274092	108760	0.396802	268308	208718	163478	259118	356615	526473	310340	348285	78318	173926	221380	122854	437042	304358	125002	270387	260913
700	unkown1252	0.00267199	0.0224826	18	6	184392	0.432672	1	20	5.99999	537438	0.00897445	0.066699	19	6.01666	361592	173874	0.480857	401155	253436	176701	283995	606270	664443	459150	419890	90614	210268	264231	148104	589750	406024	153351	320966	340522
701	unkown1253	0.0299489	0.115346	18	6	218451	0.855847	1	20	5.99999	917031	0.119544	0.40446	19	6.01666	685123	229205	0.334546	717992	533736	438879	577823	836759	1335734	688173	807459	194918	409264	585812	353216	1188583	893624	279359	676232	657348
702	unkown1254	0.0299489	0.115346	18	0	135365	0.734512	1	26.8085	12	437743	0.105959	0.369302	22.4043	5.01429	430594	210634	0.489172	659861	571485	404318	768779	253156	313445	325896	293636	410326	477229	409722	453695	489954	405845	325254	436653	437453
708	unkown126	0.000171384	0.00408964	18	15	3.62318e+06	0.260686	1	20	12	28170621	0.000492168	0.0105655	19	13.6167	2.46358e+07	4.64645e+06	0.188606	26609543	24306407	24329646	25868540	22145304	22237354	20074055	21867217	27925328	27466706	29566918	27723532	20028503	23456878	23893343	25952932	2.45908e+07
709	unkown1260	0.000320124	0.0059414	18	6	544837	0.203489	1	20	6	1.77535e+06	0.000693041	0.0126033	19	6.01667	1.14397e+06	658239	0.5754	958848	761088	674458	617205	1987008	1987947	1871492	1254956	526205	788239	773098	481510	1533363	991307	813561	1006970	1.0642e+06
713	unkown1264	0.0144977	0.0712252	18	0	436157	0.21231	1	25.8651	17.9999	3.08878e+06	0.0208796	0.120418	21.9326	18.5979	2.97527e+06	710636	0.238848	4398026	3996271	2824111	4623213	2477052	2635672	2455094	2428678	2361468	2757492	2819102	2485034	3509885	3229433	2197240	3418564	3.03852e+06
715	unkown1266	0.00980952	0.0546185	18	6	53380.6	0.0757887	1	20	6	165426	0.00609943	0.0507535	19	6.01667	120683	37208.6	0.308316	88701	122576	188450	94537	164837	165438	179722	151705	49839	91783	65673	71623	126665	104344	86331	106566	116174
716	unkown1268	0.00267199	0.0224826	24	0	154569	0.0546491	1	23.7736	6.63e-05	909417	0.00143565	0.0193856	23.8868	3.33e-05	817493	188051	0.230033	957446	924196	754068	1001961	793356	780566	727799	674261	652783	722129	662123	701273	944532	915011	855633	1024034	818198
718	unkown127	1.91e-05	0.00111825	18	6	599222	0.100751	1	20	6	1.46512e+06	2.72e-05	0.0018614	19	6.01667	878675	619429	0.704958	483693	465705	561438	466969	1624217	1589706	1261633	1384943	389874	544350	428656	466687	1009927	637181	718271	824549	803612
719	unkown1270	4.22e-05	0.00200244	18	6	253546	0.656459	1	20	6.00001	930449	0.000318275	0.00806417	19	6.01667	683885	267872	0.391692	493323	487277	441641	484338	1138482	1013634	830133	739547	351080	404941	374178	406186	816002	814643	833518	793858	651424
721	unkown1273	0.00980952	0.0546185	18	6	2.18786e+06	0.968518	1	20	6.00001	10312379	0.0537397	0.231815	19	6.01667	8.25257e+06	2.24344e+06	0.271848	7714676	7712284	5658049	4591404	7589170	7827345	15776656	10056345	4375701	6400726	6129067	4025955	11188440	9060416	9659625	9925451	7.98071e+06
723	unkown1275	0.0299489	0.115346	18	6	74362	0.984596	1	20	6	736836	0.133396	0.429724	19	6.01667	641849	108938	0.169725	571019	563950	534421	512542	847857	618517	890570	590399	560344	679957	493187	461620	696645	673308	668229	695795	628648
725	unkown1280	0.00164724	0.0165458	18	6	90603.4	0.518004	1	20	6.00001	222872	0.0068829	0.0550372	19	6.01667	146792	79872.8	0.544122	71115	77602	115684	115362	213868	246899	232341	198380	73204	94421	63467	44793	268124	100293	112577	165679	137113
726	unkown1281	0.0065055	0.0420944	18	6	61276.1	0.986531	1	20	6	370846	0.0388196	0.187448	19	6.01667	325729	52000.1	0.159642	296033	296284	265057	237133	359750	437017	316595	370021	212727	277087	293330	207188	431128	319103	373209	419179	319428
728	unkown1284	0.00267199	0.0224826	24	0	126775	0.174606	1	23.52	6.63e-05	604504	0.00404504	0.0373834	23.76	3.35e-05	475038	191802	0.403762	762436	794314	412381	448891	434009	454132	368007	391441	288499	364313	368504	286522	645448	532596	441649	632191	476583
729	unkown1285	0.000572095	0.00854353	18	3	412094	0.266135	1	20	6.63e-05	3.01098e+06	0.00149057	0.0198302	19	1.58336	2.84762e+06	673837	0.236632	3252919	3161259	2818133	2811606	2859517	3117671	2275200	3225717	2017067	2687011	2310124	2189402	3576787	3754325	3771215	3562448	2.9619e+06
730	unkown1289	1.91e-05	0.00111825	18	3	293716	0.151568	1	20	4.41e-05	774479	3.98e-05	0.00239315	19	1.58335	654879	481121	0.734672	897117	911300	665151	624350	822947	874823	604942	579650	211448	261101	272674	211289	1192198	1231685	1254587	1168331	736475
733	unkown1295	0.0210199	0.0924874	18	6	90705.7	0.58244	1	20	6	609372	0.0661456	0.269388	19	6.01667	544593	58808.1	0.107985	546474	582567	471738	467162	652600	547157	706273	531457	309336	483559	429630	298562	718680	694648	557679	601939	537466
737	unkown1300	0.00980952	0.0546185	24	0	53317.3	0.194513	1	24.0327	6.63e-05	301668	0.0138558	0.0911768	24.0163	3.31e-05	265025	70167.3	0.264757	317824	282956	293846	312048	270069	237091	209424	195183	242483	269118	174497	197359	405630	290480	284987	256813	264988
738	unkown1301	0.00421867	0.0314483	24	21	140247	0.0419948	1	24.5682	17.9999	755861	0.00170757	0.0216324	24.2841	19.5202	627349	138659	0.221023	679502	737095	735909	571949	542350	586979	464902	508747	456925	619614	519447	564143	718688	767663	804796	732301	625688
741	unkown1307	0.000572095	0.00854353	18	3	59590.5	0.227232	1	20	6.63e-05	300543	0.00129322	0.0188736	19	1.58336	275252	77062.9	0.279973	334716	302923	258279	306255	282783	315752	208691	305799	190518	212783	250274	191907	334396	340795	381159	396109	288321
742	unkown1308	0.000572095	0.00854353	18	6	284229	0.553403	1	20	6.00001	1.03055e+06	0.00286771	0.0293274	19	6.01667	772926	276136	0.357261	694434	589150	538040	480225	1063111	1113574	1167134	778371	426884	635263	547747	377305	900098	796114	871529	852438	739464
748	unkown1319	0.0210199	0.0924874	18	6	111535	0.937325	1	20	6.00001	757422	0.0970742	0.351933	19	6.01667	656072	109929	0.167556	637570	611732	534421	512542	847857	700862	890570	590399	560344	679957	493187	461620	689482	584038	774692	714738	642751
749	unkown1324	0.0065055	0.0420944	18	9	1.08589e+06	0.407547	1	20	6	3.77126e+06	0.0183806	0.109943	19	7.6	2.45884e+06	1.22788e+06	0.499373	1380797	1172754	932315	948896	5232252	5054127	1099167	3699503	1807081	2304497	2375075	1925414	1914877	1818446	2134298	1679909	2217463
750	unkown1325	0.0419656	0.142411	24	12	130460	0.293819	1	21.6708	12	1.47245e+06	0.0665304	0.270317	22.8354	12.0313	1.26842e+06	209404	0.165091	1341863	964029	1020430	1075889	1323606	1352439	1058594	1258056	1402434	1675266	1615297	1196797	1175595	1249150	1110698	1352344	1.26078e+06
755	unkown1332	0.00267199	0.0224826	18	3	535872	0.329391	1	20	6	3.21149e+06	0.00707223	0.0558215	19	4.43333	3.0558e+06	667727	0.218511	3297506	3155610	2782075	2811606	3265337	3444923	2909970	3225717	2017067	2687011	2310124	2189402	3566231	3754325	3771215	3562448	3.04691e+06
760	unkown1340	0.00980952	0.0546185	18	6	487500	0.789984	1	20	6	2.12093e+06	0.0454124	0.209632	19	6.01667	1.55456e+06	542947	0.349261	1512300	1668889	968773	994272	3087408	1258577	3280074	857654	959558	440045	572711	341933	1890876	2009582	1873547	2104037	1.48876e+06
767	unkown1350	0.0299489	0.115346	18	6	120031	0.512782	1	20	6	605080	0.0794918	0.304595	19	6.01667	499671	106618	0.213377	533723	368415	436671	435111	570292	656313	619089	574628	242638	527105	461428	373086	526029	521615	420489	521380	486751
770	unkown1354	0.000320124	0.0059414	18	6	190492	0.449313	1	20	6.00001	642734	0.00141633	0.0192821	19	6.01667	439151	212902	0.484804	361000	272355	269331	316541	713314	823326	570860	463434	161918	307092	301460	190633	586394	559260	337565	379141	413352
771	unkown1356	0.00421867	0.0314483	18	3	1.33176e+06	0.81858	1	20	6	3.93531e+06	0.0230282	0.13031	19	4.43333	3.00415e+06	2.08918e+06	0.695432	3409237	3103066	2253774	2097638	7894333	2615254	3386554	1845109	1101134	1132430	950387	899825	4053146	3909565	4713292	4256651	2.97634e+06
772	unkown1357	0.0065055	0.0420944	18	6	165861	0.70849	1	20	5.99999	579849	0.0294047	0.154383	19	6.01666	415370	185902	0.447558	335106	297794	219626	204015	651499	536074	719000	412823	383523	144665	328245	311700	505536	495158	381183	359525	392842
773	unkown1359	8.77e-05	0.00272746	18	3	1.77977e+06	0.184342	1	20	4.81e-05	4.21019e+06	0.000194508	0.00609187	19	1.58336	3.58175e+06	2.44897e+06	0.683737	5051098	5444276	3351502	2993895	4358422	4391633	4316728	2726178	1269940	1504416	1774097	1236761	6813328	6185904	6042302	6492777	3.99708e+06
774	unkown136	0.0210199	0.0924874	24	15	991791	0.23594	1	28	12	14259434	0.0312764	0.160889	26	13.6964	1.34201e+07	812029	0.0605085	12736949	11963480	11536937	12760733	14080101	13651909	11789750	13065595	13119073	14989854	15044559	13884250	13787958	13283919	13803282	15717774	1.3451e+07
775	unkown1360	0.000987235	0.0119368	18	6	332776	0.616253	1	20	6	998156	0.00511331	0.0440096	19	6.01667	714298	281292	0.393802	687838	695755	442851	405313	1142330	586202	1314365	949727	146677	673890	225233	113409	919143	852571	765048	963026	680211
776	unkown1361	0.000320124	0.0059414	18	6	298019	0.238665	1	20	6	813600	0.000800659	0.0137461	19	6.01667	536399	278283	0.518798	583986	366436	384292	247446	828738	738974	1035947	650739	380756	162497	429684	124512	486788	454823	647690	519516	502676
777	unkown1362	0.000987235	0.0119368	18	6	132264	0.591894	1	20	6	613017	0.00493476	0.0427174	19	6.01667	497754	122273	0.245649	429856	406252	414332	397940	622962	656766	597860	574481	277277	414178	440657	320378	496758	509825	657879	509594	482937
778	unkown1366	1.91e-05	0.00111825	18	3	3.44091e+07	0.0836977	1	20	6.63e-05	8.64795e+07	2.29e-05	0.00164118	19	1.58336	6.69249e+07	5.15329e+07	0.77001	102805813	100559205	73381930	69171435	84009301	80685018	64354563	52802164	20343931	23253377	24963693	23454568	128891893	119527691	130132035	112296648	7.56646e+07
779	unkown1367	0.0419656	0.142411	24	0	57945.3	0.206246	1	20	6.63e-05	396887	0.0497641	0.221438	22	3.65e-05	327627	90531.4	0.276325	419885	462456	294922	410287	376151	314545	343074	386210	294769	320576	134307	117381	359354	289524	431970	400181	334724
780	unkown1368	7.77e-06	0.000673899	18	3	276918	0.0511442	1	20	6.63e-05	653757	6.25e-06	0.000783522	19	1.58336	471276	381484	0.809469	762208	711827	684447	456548	577979	535856	493297	393710	101009	133727	165022	154058	819850	947036	818173	820833	535974
782	unkown1371	1.91e-05	0.00111825	18	3	148520	0.130298	1	20	6.63e-05	333936	3.46e-05	0.00219711	19	1.58336	262987	208205	0.791691	395584	378793	286249	275118	330359	355072	262258	185550	48844	86311	107898	92504	584604	436628	540144	406845	298298
785	unkown1374	0.00164724	0.0165458	18	6	736442	0.163323	1	20	6.00001	2.98651e+06	0.00248066	0.0268523	19	6.01667	2.48563e+06	387295	0.155813	2829157	2579564	2463622	2218769	3654782	2169391	3151157	2970701	2007417	1033124	1049768	1131432	2881746	2738030	3231125	2909434	2.4387e+06
788	unkown1378	0.0210199	0.0924874	18	3	83234.8	0.617055	1	20	6	431402	0.069328	0.277681	19	4.43333	403702	86343.9	0.21388	511508	406566	333427	439106	621605	325420	349881	428702	313494	308611	256395	311247	462786	477489	486222	408385	402553
790	unkown138	0.0299489	0.115346	24	15	1.83536e+06	0.312514	1	24.8451	12	2.21346e+07	0.0530809	0.230631	24.4225	13.53	2.01893e+07	2.23958e+06	0.110929	19496629	17693026	16081889	19116024	22581486	20039974	17787018	18790969	22863954	24543005	20670413	20460949	18958904	19754271	22131130	22333764	2.02065e+07
796	unkown1385	0.00980952	0.0546185	24	0	61152.4	0.215158	1	24.1644	6.63e-05	253882	0.0151136	0.096959	24.0822	3.3e-05	204046	68298.7	0.334723	301001	281266	145589	287672	139290	185816	172352	185946	210718	125451	117361	176374	235717	257720	214851	224693	203864
799	unkown1391	0.00980952	0.0546185	18	3	300474	0.973158	1	20	6	1.36403e+06	0.0539515	0.232177	19	4.43333	1.08667e+06	602480	0.554429	1156434	1115247	804289	770019	2798210	967674	1104802	585425	773129	380054	344384	678285	1484553	1433098	1315731	1547014	1.07865e+06
800	unkown1392	0.0419656	0.142411	18	15	49094.8	0.48366	1	20	12	327980	0.0994005	0.3571	19	13.6167	267137	70021.1	0.262117	258256	222210	266605	322291	239428	227111	191053	258385	307797	333353	358241	312529	176810	217156	283645	288476	266459
803	unkown1395	0.00164724	0.0165458	18	15	191757	0.308502	1	20	12	966270	0.00436254	0.0391155	19	13.6167	654576	349951	0.534622	699599	600949	502781	748077	515923	415066	444594	473593	1116803	748059	700931	1299289	346386	674734	545681	586533	651187
806	unkown140	0.0419656	0.142411	24	15	77834.4	0.486383	1	21.7778	12	954900	0.0998455	0.3571	22.8889	13.4589	877261	83011	0.0946252	985646	804092	676487	812749	779721	872667	780313	820055	912148	914077	933798	1059578	864865	855009	893196	1048410	875801
807	unkown1400	0.00267199	0.0224826	18	0	564599	0.455884	1	26.0177	17.9999	2.00612e+06	0.00939225	0.068321	22.0088	18.6177	1.96203e+06	547170	0.27888	3003172	2743626	1858809	3227843	1368141	1641381	1139708	1667733	1825184	1918451	1932431	1790943	2353109	2018190	1360993	2292206	2008870
808	unkown1405	0.0299489	0.115346	18	3	15363	0.96474	1	27.4766	6	281930	0.131294	0.425997	22.7383	4.37751	282477	13670.8	0.0483961	258784	290943	255951	292011	356933	242166	244411	284209	241154	269722	216367	259039	307763	311100	393742	291612	282244
810	unkown1407	0.0065055	0.0420944	18	6	113458	0.545521	1	20	5.99999	579849	0.0235686	0.132043	19	6.01666	470693	108940	0.231446	519418	439585	325334	372352	651499	536074	719000	412823	383523	363983	328245	311700	505536	495158	471637	484005	457492
811	unkown1408	0.00980952	0.0546185	18	6	83890.3	0.67279	1	20	6	426552	0.0397353	0.18948	19	6.01667	358049	66851.3	0.18671	371042	383417	284502	257850	380224	474449	512614	338920	211866	293569	308328	215439	425454	375338	326573	439581	349948
812	unkown1409	4.22e-05	0.00200244	18	6	1.6719e+06	0.264983	1	20	6.00001	6675517	0.000138613	0.00494728	19	6.01667	4.35634e+06	2.40928e+06	0.553051	3678775	3080254	2269609	2697651	7894333	6346086	8236537	4225112	2339109	3069382	2172114	2016859	5507178	4078685	3661840	3756618	4.06438e+06
815	unkown1412	0.00267199	0.0224826	18	6	191035	0.880991	1	20	6.00001	813600	0.0165996	0.103546	19	6.01667	642459	190523	0.296552	583986	482586	474963	380394	828738	738974	1035947	650739	380756	497296	429684	378704	787574	695849	792669	771086	619372
816	unkown1413	0.0210199	0.0924874	18	15	73203.8	0.991634	1	20	12	208684	0.101525	0.360596	19	13.6167	180867	81614.1	0.451237	249873	266154	187204	315896	165369	94021	83204	115486	198846	180573	216394	238921	129692	104352	162126	173123	180077
817	unkown1414	8.77e-05	0.00272746	18	6	272807	0.143883	1	20	6	769510	0.000154944	0.00521492	19	6.01667	497365	286815	0.576669	372972	273973	323927	307413	962614	752504	685084	677838	283815	366866	311016	202901	507596	487693	428101	457423	462608
819	unkown1419	0.0144977	0.0712252	18	6	89890.2	0.340745	1	20	6.00001	489714	0.0311735	0.160889	19	6.01667	429193	51229.5	0.119362	469859	442982	322537	444183	621605	449569	458980	428702	313494	308611	256395	311247	518242	477489	494311	449546	422984
823	unkown1425	0.00421867	0.0314483	18	6	411499	0.202665	1	20	6	3.32481e+06	0.0068949	0.0550372	19	6.01667	3.04966e+06	216195	0.0708916	3212208	3327548	2689764	2952259	3654782	3522582	3151157	2970701	2007417	2404102	2457925	2421968	3486342	3430245	3425622	3260792	3.02346e+06
824	unkown1427	0.0299489	0.115346	18	6	130652	0.215792	1	20	6	687994	0.039046	0.187904	19	6.01667	600375	62210.3	0.103619	663712	681312	502814	647612	783310	733142	573256	662268	268837	420502	452183	373701	875638	697785	564794	584521	592837
828	unkown1431	0.000171384	0.00408964	18	3	282094	0.144614	1	20	6.63e-05	728240	0.000287631	0.00772153	19	1.58336	593304	452336	0.762402	850264	895759	581071	585868	692551	634500	647469	441283	187406	228773	250790	229351	1239777	1182462	1215986	856966	670017
834	unkown1440	0.0299489	0.115346	18	6	37192.4	0.924301	1	20	6	237474	0.126976	0.418919	19	6.01667	182823	59301.4	0.324365	133864	152442	128127	140797	262921	338604	176770	171599	90763	148157	165351	102908	268066	192872	139241	197710	175637
836	unkown1444	0.0299489	0.115346	18	15	75909.2	0.992983	1	20	12	208601	0.13428	0.431177	19	13.6167	165241	86517.7	0.523585	265650	216869	121186	279778	115573	87931	92316	116614	262913	170504	189727	211261	142690	113801	91133	152505	164403
837	unkown1445	0.00164724	0.0165458	18	6	179404	0.0975693	1	20	6	433994	0.00156475	0.0206345	19	6.01667	246700	200248	0.811706	148436	142539	92799	89060	435043	469364	490575	340995	121755	145962	150827	97584	279967	193696	155602	204741	222434
839	unkown1447	0.0419656	0.142411	18	15	28966.3	0.90803	1	20	12	151493	0.162613	0.491545	19	13.6167	110906	49785.7	0.448902	121593	117594	92524	150753	111547	76315	95518	69690	219099	138300	97201	151372	69735	68398	86458	100677	110423
842	unkown1450	0.00164724	0.0165458	18	15	58529.5	0.818275	1	20	12	239368	0.0102564	0.0729598	19	13.6167	184391	76303.6	0.413813	197870	210116	146159	264598	177238	127115	121524	125752	276863	215668	182546	282395	133769	140725	146748	189354	183652
843	unkown1451	0.00267199	0.0224826	18	15	41695.6	0.775259	1	20	12	196068	0.0148722	0.0959567	19	13.6167	159005	55993.9	0.352152	181668	184957	151927	200968	132868	116484	120844	124465	175642	200168	179619	228844	124490	137706	120802	153954	158463
845	unkown1453	0.0065055	0.0420944	18	6	44479.5	0.206561	1	20	5.99999	211050	0.0102292	0.072956	19	6.01666	171123	43152.4	0.252172	141765	133030	150797	144944	211535	227589	207312	197762	148096	194804	118282	136192	156716	144998	167134	173341	165894
847	unkown1456	0.00980952	0.0546185	18	6	81124.6	0.596133	1	20	6.00001	313276	0.0359153	0.177025	19	6.01667	273715	37549.3	0.137184	298115	278980	199123	194372	394261	347783	309788	201271	142538	134146	111149	93667	381165	378158	478570	363551	269165
852	unkown1464	0.000320124	0.0059414	18	9	207772	0.157687	1	20	6.00002	685206	0.000549919	0.0111583	19	7.60001	499006	213443	0.427735	306183	213042	201091	344704	885903	517105	775902	561916	672013	483090	372559	501173	294713	353116	513007	317252	457048
855	unkown1467	0.00980952	0.0546185	18	6	332919	0.519254	1	20	6	1019187	0.0319868	0.163746	19	6.01667	808172	195275	0.241626	1027961	825530	384053	655332	1273391	850424	1035806	917127	328975	441892	446577	323513	1155484	1119919	707175	1058972	784508
856	unkown1468	8.77e-05	0.00272746	18	9	100464	0.03996	1	20	6	364796	4.75e-05	0.00278337	19	7.6	246264	114671	0.465642	151528	105226	185715	107598	383343	351614	307472	416754	238055	221171	256105	178864	153044	140212	195154	187698	223722
857	unkown1469	0.000987235	0.0119368	18	3	106509	0.139511	1	20	6.63e-05	348593	0.00136218	0.0189712	19	1.58336	291681	150301	0.515291	363407	459025	264557	307382	322537	334899	338755	301266	97479	186201	195711	130539	468130	359683	444572	500599	317171
859	unkown1472	0.00164724	0.0165458	18	6	90757.5	0.791985	1	20	6	359421	0.00996951	0.0718251	19	6.01667	277113	88991.1	0.321137	261192	213128	193649	179704	395592	437735	288043	316315	139231	181898	283630	165351	388099	303056	251766	262869	266329
860	unkown1473	0.000572095	0.00854353	18	3	114556	0.234345	1	20	4.87e-05	393880	0.00132957	0.0189712	19	1.58336	346518	161877	0.467153	437783	456187	329092	352460	483842	317122	425608	276954	190595	246743	177558	192444	483627	450898	618307	544322	373971
862	unkown1475	8.77e-05	0.00272746	18	3	1.45866e+06	0.240883	1	20	6.63e-05	3.71337e+06	0.000248516	0.00707346	19	1.58336	3.31691e+06	2.30044e+06	0.693548	4546962	4502236	3052059	2752245	3743152	4204153	3747538	2695389	1034614	1682486	1757387	1025960	6778423	5804572	5792112	6193500	3.70705e+06
868	unkown1483	0.000320124	0.0059414	18	12	181223	0.04381	1	20	12	541762	0.000170746	0.0056209	19	12.0333	325350	253484	0.779113	181041	78900	157563	289319	450913	241061	308730	364508	658626	513665	560785	433973	81652	97597	107215	200934	295405
869	unkown1484	1.91e-05	0.00111825	18	12	179065	0.0565108	1	20	12	755098	1.59e-05	0.00132816	19	12.0333	511500	287945	0.562942	373132	237033	412238	443431	544810	504639	435252	579550	716441	740049	951904	611999	267267	271413	225890	324698	477484
871	unkown1486	0.000572095	0.00854353	18	12	212775	0.0217182	1	20	12	451550	0.000152774	0.00521492	19	12.0333	224231	247281	1.1028	48520	45163	131083	100802	148197	121732	193571	243354	514941	452543	465493	373223	14364	60506	101805	105004	195019
873	unkown1489	0.0144977	0.0712252	24	9	102261	0.0646447	1	23.9024	6	321587	0.00747194	0.0581725	23.9512	7.49698	239089	105397	0.440829	196837	102910	248243	136455	346162	340480	271966	327739	299516	292630	368453	222286	127059	147878	150882	242409	238869
875	unkown1490	0.000572095	0.00854353	18	3	134358	0.909267	1	26.9725	6	446470	0.00445349	0.0395378	22.4862	4.37487	456660	101587	0.222457	477482	338681	470125	353223	742692	325310	420207	297673	246143	182024	110505	229606	574244	590397	1418691	498030	454690
876	unkown1491	0.00267199	0.0224826	18	3	227830	0.184518	1	20	6.63e-05	492932	0.00424743	0.0386752	19	1.58336	385562	305431	0.792171	397080	708702	505912	360037	512558	513631	380364	249243	158469	92881	136266	104331	837755	693905	841349	505298	437361
878	unkown1495	8.77e-05	0.00272746	18	3	181965	0.0871966	1	20	6.63e-05	519056	9.77e-05	0.00423075	19	1.58336	397069	285003	0.717768	684572	519382	456903	415369	523216	323802	332840	418592	74472	164250	199797	202708	721135	669873	793092	626457	445404
879	unkown1496	8.77e-05	0.00272746	24	0	185745	0.0122387	1	23.52	6.86e-05	711106	1.58e-05	0.00132816	23.76	3.46e-05	466819	269196	0.57666	717235	735411	720096	671687	509902	529445	375833	384535	169702	220940	246984	196658	627492	481615	457965	458296	468987
880	unkown1497	0.000171384	0.00408964	18	3	177679	0.107395	1	20	6.63e-05	367541	0.000219082	0.00667607	19	1.58336	300855	226167	0.751748	422165	359854	380937	307210	379540	423498	327306	285905	118011	65782	98478	87998	510020	551633	551155	557885	339211
881	unkown1498	1.91e-05	0.00111825	18	3	473158	0.0446342	1	20	6.63e-05	1.14882e+06	1.28e-05	0.00119905	19	1.58336	843086	582352	0.690738	1169701	1255596	1210842	959145	1011700	1010977	804728	752401	250076	285543	310298	460637	1440636	1206610	1639526	1301177	941850
882	unkown1499	2.89e-06	0.000406746	24	0	699931	0.0157116	1	20.6557	7.96e-05	3.32965e+06	8.12e-07	0.00018312	22.3279	4.3e-05	2.67759e+06	888918	0.331985	3332537	3351190	3189166	3445746	2884862	2579718	2454386	2464402	1504119	1700837	1967717	2135174	3324376	3263991	3089376	3063394	2.73444e+06
884	unkown150	0.0299489	0.115346	18	6	25712.7	0.568059	1	20	6	122732	0.0863193	0.325502	19	6.01667	97997.2	22081.6	0.225329	106427	66785	103550	95077	165549	120031	93757	111589	75776	65682	23432	81071	95657	134012	118452	68294	95321.3
885	unkown1500	7.77e-06	0.000673899	24	0	177337	0.0195419	1	22.4427	4.21e-05	612110	2.54e-06	0.000423573	23.2214	2.18e-05	440984	230200	0.522014	628776	649174	503738	666754	411080	430964	390692	378799	185003	196646	289294	271240	630407	584162	437397	503138	447329
886	unkown1501	0.0299489	0.115346	24	0	53072.6	0.19273	1	20.9501	4.84e-05	296988	0.0355254	0.175679	22.4751	2.59e-05	247329	62761.4	0.253757	333739	262649	249021	342542	214887	242287	266031	260274	174437	178184	153470	230981	257796	228860	367078	252906	250946
887	unkown1502	0.00421867	0.0314483	24	0	391288	0.0893331	1	21.5648	7.05e-05	2.08986e+06	0.00334794	0.0327532	22.7824	3.72e-05	1.73271e+06	487004	0.281065	2110955	1952213	1920200	2376071	2080300	1349585	1839956	1422855	1445401	1152751	1017702	1506377	1862298	1927610	2263102	1845475	1.75455e+06
888	unkown1504	0.00164724	0.0165458	24	0	63899.6	0.0642948	1	21.8859	6.63e-05	357727	0.00107529	0.0164114	22.9429	3.48e-05	269595	88110.5	0.326826	415367	286200	325784	403558	396855	231132	257223	287286	188430	115945	150249	201458	307836	280707	259614	259996	272978
890	unkown1506	0.000987235	0.0119368	24	0	65787.8	0.0572061	1	23.9024	5.78e-05	403628	0.000608906	0.0116608	23.9512	2.89e-05	324699	89858.5	0.276744	408309	397975	348689	459540	321097	255301	321241	340162	279188	200931	215667	284114	293619	320498	392378	358778	324843
891	unkown1508	0.0144977	0.0712252	24	0	60130.6	0.236633	1	23.2718	6.63e-05	473969	0.0228995	0.129745	23.6359	3.37e-05	415743	81245.6	0.195423	405952	479939	488848	521137	438116	367533	376608	398467	328191	322040	330971	413471	379194	422366	567622	427523	416749
892	unkown1509	0.000320124	0.0059414	24	0	90286.6	0.0472013	1	25.2722	6.63e-05	592082	0.000182836	0.0058668	24.6361	3.23e-05	471012	122308	0.259671	561030	563913	562979	680411	499170	431639	395720	382745	292339	370046	420412	420649	429959	490267	503835	493141	468641
893	unkown151	0.000987235	0.0119368	18	6	72654.5	0.506688	1	20	5.99999	391414	0.00430213	0.0387277	19	6.01666	318044	72230.8	0.227109	316456	284839	257156	267813	509922	355954	335922	363856	267157	223083	198107	201711	279374	404200	367214	315900	309292
894	unkown1510	0.00980952	0.0546185	18	0	75084.5	0.38473	1	25.8651	17.9999	460980	0.0248316	0.136241	21.9326	18.5979	445711	82134.1	0.184276	513386	507138	473471	735521	458638	326186	407163	367323	457161	375894	327370	455178	446343	441992	476316	479271	453022
895	unkown1511	0.0299489	0.115346	24	0	237525	0.246059	1	23.0287	6.63e-05	1.5014e+06	0.0435553	0.20377	23.5144	3.39e-05	1.34435e+06	305292	0.227092	1433794	1331981	1625959	1613869	1392059	1097901	1242150	1288596	1110717	950157	943096	1423100	1269403	1490064	1857613	1520804	1.34945e+06
896	unkown1512	0.00421867	0.0314483	18	3	38746.3	0.102824	1	20	6.63e-05	195942	0.00379254	0.0360092	19	1.58336	170534	46494	0.272638	184257	191372	173415	234724	192851	147919	173949	191265	125820	136526	121126	129441	234244	227835	204897	185059	178419
903	unkown1523	0.00980952	0.0546185	18	6	71231.8	0.485213	1	20	6	414356	0.0302126	0.157461	19	6.01667	348404	66935.8	0.192121	352413	337319	270807	287931	450906	444284	408636	353598	260604	331507	314753	231639	417351	313572	306778	362580	340292
904	unkown1524	0.00267199	0.0224826	18	6	92786.4	0.354017	1	20	5.99999	342994	0.00753277	0.0583725	19	6.01666	251327	102358	0.40727	219016	142638	176701	154966	322370	336237	416006	297363	203691	235699	203159	135743	263187	204382	236361	275260	238924
906	unkown1528	0.0210199	0.0924874	18	9	75386.2	0.486348	1	20	6	559164	0.057076	0.241472	19	7.6	461811	84508.9	0.182995	383412	396164	320223	373382	702390	489845	598431	445990	499158	484637	375978	342340	416875	400408	431777	462160	445198
909	unkown1530	0.0299489	0.115346	18	6	154416	0.678934	1	20	6	520808	0.0995418	0.3571	19	6.01667	382387	151537	0.396293	408901	213530	245732	227179	679385	535014	458938	409893	200568	463448	326466	161818	405812	354128	313406	420168	364024
912	unkown1536	0.0065055	0.0420944	18	6	2.37616e+06	0.121655	1	20	6	8.48611e+06	0.00644351	0.0525501	19	6.01667	5.52599e+06	3.13061e+06	0.566525	4823959	3486100	2895552	3275266	10022579	8060773	9582091	6279003	3979893	4673770	3131878	3006041	5826441	4393176	4296619	4612864	5.14663e+06
913	unkown1538	0.00164724	0.0165458	18	15	102021	0.0875327	1	20	12	522248	0.00141944	0.0192821	19	13.6167	388206	151356	0.389886	398563	353136	386317	336044	314909	288015	231896	319436	606072	537544	540041	405337	298972	340479	435003	396084	386740
914	unkown1539	0.00267199	0.0224826	18	3	262596	0.113331	1	23.7736	6.63e-05	1.46441e+06	0.00275638	0.0284469	20.8868	1.7406	1.16875e+06	475080	0.406487	1758832	1282831	1499932	1316074	887938	1212437	660934	1224974	908999	727032	609650	1086763	2014849	1459686	1303543	1374162	1.20804e+06
915	unkown1540	0.00980952	0.0546185	18	0	328333	0.773606	1	20	12	1.06369e+06	0.0446299	0.207059	19	15.2	1.00871e+06	385902	0.382572	1515376	1536542	1051823	1562856	526903	846587	733316	759928	1118329	1074433	1096300	965699	1241666	1033463	553629	1148271	1.04782e+06
916	unkown1541	0.0144977	0.0712252	18	9	62653.2	0.577204	1	20	6	263094	0.0483956	0.217395	19	7.6	194256	58710.3	0.302231	159805	104718	113533	105628	320274	294825	240432	196847	245796	177384	128551	109102	171821	153341	239858	161524	182715
917	unkown1543	0.0065055	0.0420944	18	6	267264	0.73732	1	20	6	1.11465e+06	0.0304099	0.157461	19	6.01666	836779	313406	0.374538	687864	558459	562991	524906	1176527	1475917	784443	1021716	508610	676863	799499	527900	1054254	832599	744240	844016	798800
919	unkown1547	0.0419656	0.142411	18	6	179294	0.42652	1	20	6	704241	0.0899074	0.334833	19	6.01667	519894	161838	0.31129	457631	561569	511849	476694	882715	547303	723222	663723	245837	381702	141073	472457	856763	542169	323226	216587	500282
920	unkown1548	0.000987235	0.0119368	18	6	140368	0.217936	1	20	6.00001	562892	0.00203195	0.0242167	19	6.01667	437771	121626	0.277831	453671	420525	307444	360309	611581	601406	552984	485597	237462	388354	304500	281252	513856	497105	382810	369665	423033
921	unkown1549	0.00980952	0.0546185	18	6	136620	0.883869	1	20	6	812259	0.0498358	0.221438	19	6.01667	573130	272813	0.476007	320447	397892	355758	288125	1086961	1053475	632100	476500	439721	338035	386469	315890	816865	584719	552037	596126	540070
924	unkown1552	8.88e-07	0.000200244	18	6	2.95828e+06	0.193862	1	20	6	8.53087e+06	2.85e-06	0.000443289	19	6.01667	5.43423e+06	3.16715e+06	0.582814	4199980	3926851	3308756	3203128	10339279	9623921	7498762	6661508	2442130	2639822	2582484	2455562	7471949	5412467	4665691	4374703	5.05044e+06
927	unkown1557	0.0210199	0.0924874	24	0	77626	0.252205	1	24.5682	17.9999	523014	0.0330792	0.167815	24.2841	21.0379	492447	73804.6	0.149873	628597	573587	436893	613629	446206	444820	437739	421942	377296	410183	437604	543128	568189	520615	521315	481937	491480
930	unkown1561	0.0144977	0.0712252	18	0	32862.1	0.190352	1	22.9091	17.9999	300030	0.0190214	0.112286	20.4545	18.263	271384	37205.6	0.137096	346409	301080	249762	332701	248389	201496	253336	251217	277143	240640	286152	246271	305524	295047	297993	301558	277170
931	unkown1563	0.0210199	0.0924874	18	0	48090.5	0.306783	1	20	17.9999	402010	0.0389743	0.187793	19	18.05	380220	42862.8	0.112732	419323	397235	423066	509131	307436	328872	334688	329186	402609	382641	361202	429096	375496	442469	365882	424193	389533
933	unkown1567	0.0210199	0.0924874	18	15	105194	0.681269	1	20	12	566232	0.0751249	0.292585	19	13.6167	467363	139353	0.298169	494101	460256	401164	624564	438616	329753	368828	333350	675060	519984	446314	623571	338524	422951	512301	466873	466013
934	unkown1568	0.0419656	0.142411	18	15	64675	0.981025	1	20	12	507249	0.172502	0.50683	19	13.6167	467314	75195	0.160909	523043	490929	423069	592055	384502	422223	357788	472067	541636	475363	460155	551841	456415	385426	453096	475768	466586
942	unkown1576	0.00980952	0.0546185	18	15	26829	0.740097	1	20	12	145663	0.0430182	0.201886	19	13.6167	112853	43658.1	0.38686	123703	123857	108943	129325	129723	76975	80952	56894	189475	124912	116537	151727	100391	80788	100952	103722	112430
944	unkown1578	2.22e-07	6.26e-05	18	3	442633	0.0379891	1	20	4.57e-05	1.20559e+06	1.65e-07	0.000177483	19	1.58336	857406	688556	0.803069	1321004	1415283	1075711	1010378	824332	949427	698588	691325	304982	298311	329500	317399	1586685	1602324	1691898	1469748	974181
948	unkown1584	0.0144977	0.0712252	18	15	141249	0.998708	1	20	12	597358	0.0757983	0.293938	19	13.6167	508847	180162	0.354059	690322	660386	539647	652211	335851	498666	311572	405107	708935	600904	573337	506257	449006	377442	355190	448808	507103
949	unkown1589	0.000320124	0.0059414	18	3	142081	0.380318	1	26.4865	6	367928	0.00121914	0.0179984	22.2432	4.37299	378497	98383.1	0.259931	416894	418667	295759	262717	386513	491527	255706	337966	110747	138382	191227	93476	633961	631281	623685	733831	376396
950	unkown1590	0.000987235	0.0119368	18	6	108401	0.305389	1	20	6	367148	0.00274561	0.0284469	19	6.01667	250312	127254	0.508381	191428	148495	159242	139552	421359	423075	293038	331120	129096	177264	196251	147757	281300	273730	188452	257104	234891
951	unkown1591	0.000572095	0.00854353	18	6	53101.6	0.332553	1	20	6	267208	0.00182017	0.0225175	19	6.01667	204819	68611.9	0.334988	175264	149687	131394	163239	328540	267996	218008	254288	148340	170862	185934	146396	210428	188786	195770	209139	196504
952	unkown1592	0.000987235	0.0119368	18	6	222870	0.449074	1	20	6.00001	710476	0.00386646	0.0365571	19	6.01667	481664	241230	0.500827	396413	308280	322809	276800	667845	949743	556632	667682	166761	289147	396563	235525	694948	499309	344770	465687	452432
954	unkown1594	0.0065055	0.0420944	18	6	67248.3	0.735742	1	20	6	273598	0.030355	0.157461	19	6.01667	208586	70870.8	0.339768	186880	166219	142395	128089	264308	356832	225284	247968	94233	152001	192209	149616	249914	231229	166307	246483	199998
956	unkown1596	0.00164724	0.0165458	18	6	228190	0.656592	1	20	6.00001	736238	0.00846795	0.0637196	19	6.01667	527074	226094	0.42896	436440	343358	377909	285804	729028	924751	608650	682521	193956	341752	409964	285258	729439	625388	394400	626202	499676
957	unkown1597	8.77e-05	0.00272746	18	6	139054	0.247929	1	20	6	417438	0.000255159	0.0071453	19	6.01667	277533	148647	0.535601	204031	164012	188748	162298	484772	465561	358340	361078	150724	164841	173721	142942	362855	274756	253941	239699	259520
958	unkown1598	8.77e-05	0.00272746	18	6	604873	0.286709	1	20	6	2040798	0.000291415	0.00777682	19	6.01667	1.35165e+06	732099	0.541636	953188	887842	902923	748918	2183484	2591910	1501899	1885899	610702	806018	1037708	666138	1670002	1334238	1141788	1284213	1.26293e+06
959	unkown1599	2.89e-06	0.000406746	18	9	87866.7	0.0120019	1	24.1644	5.99999	242052	6.3e-07	0.000177483	21.0822	7.88789	185435	78782.2	0.424852	103179	116867	89466	97320	253600	242765	238347	233496	197762	239707	227390	224331	143045	133449	131003	134235	175373
962	unkown1600	8.77e-05	0.00272746	18	9	81577.1	0.0121981	1	24.2975	12	198844	1.58e-05	0.00132816	21.1488	10.5096	155605	68795.9	0.44212	79333	82693	76703	93090	222926	214885	181088	175017	170786	210393	199964	214232	118317	105188	106091	107955	147416
963	unkown1602	0.00267199	0.0224826	24	12	614659	0.0135676	1	23.9024	12	1.59498e+06	0.000406935	0.00931613	23.9512	12.0001	1.10151e+06	749163	0.680124	779047	825537	569304	567415	1462576	1334684	1539243	1520301	1227942	1777607	1770022	1604342	615283	617078	659935	734720	1.10031e+06
964	unkown1603	0.00164724	0.0165458	18	6	547289	0.535628	1	20	6	1.82032e+06	0.00708756	0.0558215	19	6.01667	1.41574e+06	379425	0.268004	1346151	1558374	1040934	1032110	1970499	2438317	1061887	1810578	488043	838580	775116	546091	2102224	1903428	1666022	1337859	1.36976e+06
969	unkown1613	4.22e-05	0.00200244	18	3	145200	0.248329	1	25.7143	5.01e-05	403422	0.000130581	0.00486712	21.8571	1.82145	390382	353507	0.905541	485320	452558	345772	330037	443608	483248	300286	295669	139288	164354	181207	134190	657001	619219	716297	765102	407072
970	unkown1614	0.000320124	0.0059414	18	3	103284	0.2576	1	20	6.63e-05	247377	0.000857884	0.0143831	19	1.58336	220510	164850	0.747584	289829	294638	202721	202320	277550	315955	161957	205793	68357	100674	110430	47626	420490	386269	425064	465804	248467
971	unkown1616	0.000320124	0.0059414	18	6	318037	0.184206	1	20	6	954684	0.000633237	0.0118012	19	6.01667	712245	218720	0.307086	647614	879862	489427	578190	933724	1026632	1114067	744312	259358	357586	366378	281881	956753	832459	698519	805088	685741
977	unkown1624	0.000320124	0.0059414	18	6	150412	0.287342	1	20	6	398760	0.000946885	0.0152097	19	6.01667	249119	158407	0.635869	192697	153324	107959	129499	437979	480290	342474	334298	83517	143181	157807	82475	346293	237534	191813	257632	229923
980	unkown1628	0.0419656	0.142411	18	6	34239.9	0.826299	1	20	6.00001	429838	0.151247	0.46625	19	6.01667	388360	42524.6	0.109498	374225	356598	374495	354161	467204	467044	398334	386769	367916	427319	320687	297885	381537	330178	390591	436374	383207
984	unkown1633	0.00421867	0.0314483	18	6	74563.3	0.213056	1	20	6	245334	0.00720348	0.0564022	19	6.01667	171287	78424.6	0.457854	90882	129697	121386	147234	202073	279879	232157	267227	89748	113102	152225	124167	200817	178594	103890	155461	161784
985	unkown1634	0.0299489	0.115346	18	9	55025.1	0.388387	1	24.7059	6	252466	0.0634399	0.261053	21.3529	7.93109	222105	40861.8	0.183975	195474	166853	179865	154300	249580	267089	201642	291553	261116	245709	286540	168186	150220	210440	227557	221158	217330
987	unkown1637	0.0299489	0.115346	18	6	40687.3	0.0808571	1	20	6	179470	0.0170076	0.104931	19	6.01667	140445	31454.6	0.223963	184382	148401	112868	140218	179105	208672	131377	198725	97432	84150	109933	92710	105710	146936	124132	121390	136634
988	unkown1638	0.0299489	0.115346	24	12	69514.3	0.338864	1	24.5682	12	343724	0.056735	0.24066	24.2841	12.0016	281442	85451.9	0.303622	266164	146197	206350	210859	381659	305180	245879	347484	452789	328988	378772	214348	188426	282811	272934	287018	282241
991	unkown1640	0.0210199	0.0924874	18	9	93955	0.359482	1	24.4321	6.00001	438531	0.0444715	0.207059	21.2161	7.90912	376746	78284.5	0.207791	357042	242003	310421	235650	443680	526719	324490	459236	414109	424209	490569	296411	280530	361772	346421	361386	367166
1000	unkown1656	0.000320124	0.0059414	18	15	130811	0.241439	1	20	12	572875	0.000809072	0.0137695	19	13.6167	416580	189629	0.455205	529126	401673	351010	415579	340871	275454	263578	322001	680720	498987	642960	468832	277280	386737	374741	406343	414743
1001	unkown1657	0.000320124	0.0059414	18	15	62979.3	0.0392717	1	20	12	283554	0.000154433	0.00521492	19	13.6167	196513	93598.1	0.476295	207276	168346	160503	178451	148493	118282	137661	150124	334186	270772	290617	238641	155965	176096	195387	198904	195606
1003	unkown1659	0.000987235	0.0119368	18	6	102764	0.302127	1	20	6	296387	0.00271948	0.0283253	19	6.01667	196817	108338	0.550448	127519	123706	126685	103806	268930	388397	251239	276981	88167	130547	183135	97996	216567	176157	167969	211220	183689
1005	unkown1660	0.00267199	0.0224826	18	6	149648	0.105147	1	20	5.99999	420673	0.00257838	0.0276211	19	6.01666	284200	148836	0.523702	197140	201133	162849	164769	458098	424281	392464	407848	195443	182508	249172	195288	315352	224634	252034	235610	266164
1006	unkown1661	0.0144977	0.0712252	18	6	72995	0.316822	1	20	6.00001	276984	0.0293192	0.154294	19	6.01667	210751	76027.5	0.360745	158408	143009	142940	147122	314385	276805	245440	271306	210408	171345	169913	145470	191609	190646	231310	214498	201538
1007	unkown1662	0.000987235	0.0119368	18	6	282954	0.235461	1	20	6	817147	0.00217736	0.0250508	19	6.01667	549250	288625	0.52549	335785	396239	378524	304047	790494	971906	717939	788250	240446	335538	505593	339461	694158	504675	432289	493042	514274
1008	unkown1663	0.000320124	0.0059414	18	6	78265.4	0.450406	1	20	6	297248	0.00141942	0.0192821	19	6.01667	225987	76456	0.33832	183536	186445	175489	147159	290710	346218	256975	295088	124168	164857	223313	137361	275694	241198	213082	206267	216722
1010	unkown1665	0.00267199	0.0224826	18	6	304238	0.312029	1	20	6	907075	0.00674462	0.054125	19	6.01667	650083	278196	0.427939	438243	568156	444150	381577	840168	971025	879747	937359	303158	390815	707586	459694	793116	605872	586852	554418	616371
1011	unkown1666	0.00267199	0.0224826	18	6	254820	0.107929	1	20	6	696756	0.00263909	0.0278742	19	6.01667	462016	251939	0.545302	307900	315178	258682	306019	777649	629689	674778	704909	247203	316178	353107	325293	532281	390096	391637	373186	431487
1012	unkown1667	0.00267199	0.0224826	18	6	1.03089e+06	0.183661	1	20	6	3046222	0.00422998	0.0386752	19	6.01667	2.05863e+06	1.07489e+06	0.522139	1295749	1414118	1251702	1269342	3305667	3339956	2713303	2825962	1001537	1355117	1885765	1339706	2385760	1888883	1761819	1819636	1.92838e+06
1013	unkown1668	7.77e-06	0.000673899	18	6	181681	0.0809483	1	20	6.00001	506082	9.61e-06	0.000963148	19	6.01667	333618	176115	0.527893	285676	244202	204243	222527	538923	542832	441658	500917	179892	196621	216713	179410	379787	315555	268443	279027	312277
1016	unkown1670	0.00267199	0.0224826	18	6	233432	0.125431	1	20	6.00001	1.12284e+06	0.00301668	0.0302338	19	6.01667	887195	239100	0.269501	854449	754201	651572	802825	1214776	1210564	979004	1087014	591902	751867	654707	839069	803204	951536	816590	768250	858221
1017	unkown1671	0.0144977	0.0712252	18	6	95804.5	0.108452	1	20	6	414957	0.0117219	0.0802213	19	6.01667	323539	89707.5	0.27727	316882	263436	233081	335081	476115	411752	365514	406448	204313	232943	253145	327859	282548	313810	308547	271211	312668
1018	unkown1672	0.0299489	0.115346	18	6	63125.7	0.257347	1	20	6	367789	0.0452077	0.208901	19	6.01667	294991	71330.9	0.241807	285969	264889	224169	287810	453124	397970	273861	346202	195760	231787	230409	286083	259675	289964	305026	248849	286347
1019	unkown1674	0.00164724	0.0165458	18	6	29863.4	0.456364	1	20	6	88001.5	0.00615911	0.0510617	19	6.01667	66089.8	20164.3	0.305105	74133	68044	49990	37021	108572	107854	75856	59724	18011	16615	42620	2273	106474	99640	81415	70098	63646.2
1021	unkown1685	0.00980952	0.0546185	24	15	17825.1	0.063058	1	20.464	12	112862	0.00518862	0.0444036	22.232	13.4659	88968.6	28732.1	0.322946	79634	71414	61118	83492	79342	72675	76328	74745	94788	107296	133650	115713	73264	86130	100692	101705	88249.1
1033	unkown1697	0.0419656	0.142411	24	15	15556.3	0.333589	1	20	12	178497	0.0737586	0.288782	22	13.475	158962	24253.9	0.152576	149403	138945	127920	178069	152975	155927	137438	144532	181654	179389	194669	158275	138920	169020	169460	156363	158310
1047	unkown1724	0.0144977	0.0712252	24	12	96521.5	0.163216	1	20	12	659338	0.0166738	0.103866	22	12.1	517081	165822	0.320688	527364	398143	373252	412491	534633	505529	428683	583603	772387	643947	759627	461389	398119	402449	462485	452678	507299
1049	unkown1727	0.00267199	0.0224826	18	0	19975.4	0.25052	1	24.7059	17.9999	148544	0.00556204	0.0468875	21.3529	18.455	139033	23710.2	0.170537	200818	142982	148818	177574	116693	124444	115836	121470	110830	143560	131353	139604	135094	141525	151420	166139	141760
1050	unkown1728	0.0210199	0.0924874	18	0	59082.5	0.69111	1	20	12	394756	0.0760018	0.294474	19	15.2	382800	74623.4	0.194941	470753	424072	434579	487583	320081	367000	303606	304200	402777	426366	403965	345918	335997	319421	449847	449656	390364
1052	unkown173	0.0299489	0.115346	18	9	148227	0.783341	1	20	6.00002	922097	0.111494	0.384284	19	7.60001	801118	119190	0.14878	689975	654998	548207	645143	921973	1028216	756260	981940	836730	764448	866193	610342	679239	694254	822214	942880	777688
1054	unkown1731	0.0419656	0.142411	18	0	131101	0.812125	1	20	17.9999	882049	0.149242	0.461648	19	18.05	863743	109419	0.12668	1248988	848369	940845	1152359	674039	877385	690841	730892	830563	1017071	902657	758076	872171	790032	923107	942886	887518
1058	unkown1735	0.00980952	0.0546185	18	9	54188.8	0.326057	1	20	6.00001	485146	0.0215739	0.123632	19	7.6	422354	61875	0.1465	351391	311480	319416	454669	475188	504340	448373	512685	387928	430592	422122	403585	312747	381178	384753	462606	410191
1060	unkown1737	0.00421867	0.0314483	18	6	109670	0.934952	1	20	5.99998	390991	0.0257777	0.139696	19	6.01666	318280	77337.4	0.242985	370784	233250	222371	192671	519748	398670	267224	378323	164266	220227	143751	186118	493099	410648	471870	269512	308908
1061	unkown1738	0.0299489	0.115346	18	6	60737.3	0.941139	1	20	6.00001	223997	0.12878	0.421848	19	6.01667	173753	54614.7	0.314323	153949	173085	107917	95246	256030	287359	138491	214107	41151	150491	172430	114813	216934	161211	199306	191643	167135
1064	unkown1740	0.0144977	0.0712252	18	6	107694	0.0739184	1	20	6	323651	0.00840018	0.0634259	19	6.01667	228966	85485.3	0.373353	113898	305835	224657	210776	308698	377280	272581	336046	103219	150299	140968	148754	203124	209218	193441	198921	218607
1065	unkown1741	0.000572095	0.00854353	18	6	125494	0.321837	1	20	6	397705	0.00176755	0.0221657	19	6.01667	303004	90313.6	0.298061	192409	395872	243233	239032	428659	435029	303908	423225	141272	202912	189391	222577	289018	355193	251504	359722	292060
1066	unkown1744	2.22e-07	6.26e-05	18	6	2.61019e+06	0.0705233	1	20	6	5.69551e+06	2.97e-07	0.000177483	19	6.01667	3.11323e+06	2.61106e+06	0.8387	1870014	1655037	1860287	1682895	5921993	6312549	4442243	6105246	750145	926247	1049304	751599	3141226	2895129	2617125	2768064	2.79682e+06
1070	unkown1751	0.00267199	0.0224826	18	6	320429	0.0751694	1	20	5.99998	1.11546e+06	0.0019107	0.0232271	19	6.01666	814048	279815	0.343733	460569	940485	666598	896987	1001422	1295618	1051813	1112989	413814	583786	547328	583810	797034	719294	662197	748506	780141
1078	unkown1767	2.22e-07	6.26e-05	18	6	4.75198e+06	0.069091	1	20	6.00001	9.65217e+06	2.91e-07	0.000177483	19	6.01667	5.08321e+06	4.69105e+06	0.922853	2662483	2465741	2620239	2266710	9831827	11006165	7897633	9873038	1068357	1670025	1720672	1286283	5071764	4676918	3829479	4288560	4.51474e+06
1080	unkown1770	2.22e-07	6.26e-05	18	6	1.36279e+06	0.0674125	1	20	6.00001	2.84988e+06	2.85e-07	0.000177483	19	6.01667	1.50925e+06	1.37086e+06	0.908303	803103	721728	820227	736356	2913171	3277710	2281097	2927533	312908	472299	535911	394725	1484895	1377508	1158205	1272723	1.34313e+06
1082	unkown1774	2.22e-07	6.26e-05	18	6	1.48376e+06	0.0655231	1	20	6.00001	3.00096e+06	2.77e-07	0.000177483	19	6.01667	1.57082e+06	1.46668e+06	0.933705	795627	829604	818616	654429	3086326	3501182	2507845	2908468	386769	515397	576733	370890	1700391	1366916	974576	1295672	1.39309e+06
1095	unkown1793	0.0419656	0.142411	18	15	62589.9	0.239037	1	20	12	385296	0.056196	0.238873	19	13.6167	329879	70985.4	0.215186	368770	301316	285824	346973	277947	274152	267994	261585	393419	410541	384765	352458	238119	328057	371060	404082	329191
1106	unkown1805	4.22e-05	0.00200244	18	6	455658	0.271824	1	20	6	1.67393e+06	0.000141899	0.00499973	19	6.01667	1.18373e+06	518010	0.437608	875488	763516	954668	797072	1842710	1906246	1294099	1652682	632083	816170	859809	667320	1385229	1112409	1094565	1281253	1.12096e+06
1107	unkown1806	0.000320124	0.0059414	18	6	169825	0.273183	1	20	6	652524	0.000904644	0.0148903	19	6.01667	450289	218950	0.486243	288306	258601	330036	314544	747019	764889	497479	600708	257514	329365	335533	267507	486180	458239	379807	464373	423756
1109	unkown1808	0.0299489	0.115346	24	12	26339.2	0.420323	1	20	12	190206	0.0676616	0.273808	22	12.1	154707	40616.7	0.262539	124932	137107	121107	133206	140663	172215	110988	191273	176502	190128	236000	158193	81250	139503	157074	166833	152311
1112	unkown1810	0.00980952	0.0546185	18	9	260974	0.112711	1	20	5.99999	1770856	0.00863211	0.0646692	19	7.6	1.25715e+06	382553	0.304301	987793	888281	868012	810462	1880645	1954590	1231349	2016840	1037143	943132	1043575	911225	985881	1191374	1030609	1130321	1181952
1114	unkown1814	0.0419656	0.142411	18	9	33910.4	0.645252	1	24.0327	6	375758	0.124805	0.414484	21.0163	7.87756	352333	33816.2	0.0959781	337917	307751	263762	364675	413160	397423	288268	404182	374208	354335	393716	355179	287678	334038	348624	341899	347926
1118	unkown1819	0.0144977	0.0712252	18	15	65877.8	0.460342	1	20	12	340951	0.0401072	0.190874	19	13.6167	298002	77152	0.258897	362038	323034	276102	347536	239826	240249	182768	254959	313793	336046	377705	336260	296201	246703	259603	363259	297255
1119	unkown182	0.0144977	0.0712252	18	9	57937.7	0.305482	1	20	6	400044	0.0284312	0.150675	19	7.6	345240	60826.6	0.176186	349557	286414	232901	282928	345764	457294	333832	463287	324788	319346	408634	333939	299520	255906	311018	327403	333283
1120	unkown1821	0.0299489	0.115346	18	6	38584.7	0.799076	1	20	5.99997	162496	0.113257	0.388946	19	6.01665	131968	30981.5	0.234765	177923	106745	78894	93927	149847	188140	144129	167870	70461	116547	97786	104797	133727	110497	136957	173173	128214
1122	unkown1823	0.0144977	0.0712252	24	12	45226.9	0.179474	1	23.52	12	370086	0.0180876	0.108991	23.76	12.0012	320046	58163	0.181733	294891	301754	231432	264137	346731	322356	293645	359960	376320	359316	366580	378128	224834	295615	361669	336112	319592
1125	unkown1826	0.0419656	0.142411	24	12	54456.6	0.222438	1	24.2975	12	383700	0.0529655	0.230352	24.1488	12.0005	334653	69403.8	0.20739	274379	295722	228407	321345	460143	331926	307898	368005	406939	400412	366431	361017	258652	291767	369242	317588	334992
1128	unkown183	0.0299489	0.115346	24	9	86362.8	0.169134	1	20	6	1.01205e+06	0.0318376	0.163168	22	7.425	897843	104599	0.1165	895581	848689	734324	815094	1004511	1074258	867053	1102377	834519	878403	953184	919337	820136	770149	815822	891600	889065
1129	unkown1830	0.0419656	0.142411	24	12	25898.1	0.277101	1	24.0327	12	210562	0.0634262	0.261053	24.0163	12	185042	32046.3	0.173184	162047	170180	129680	174091	226551	192984	164270	196141	201911	226137	209435	204765	158305	147202	178640	218603	185059
1139	unkown1841	0.00164724	0.0165458	24	12	56634.7	0.133911	1	22.7907	12	320157	0.00207773	0.0245303	23.3953	12.008	258809	72799	0.281285	233133	206399	181684	203326	297189	252804	231298	303432	320214	312815	350205	297394	136771	285539	269602	236507	257394
1140	unkown1842	0.000572095	0.00854353	18	6	302471	0.874348	1	20	6	1.01098e+06	0.00430205	0.0387277	19	6.01667	695525	358528	0.515479	416587	351990	379057	378316	1134072	1321092	758262	830483	322573	388719	369654	329603	1110802	867920	694111	780010	652078
1142	unkown1844	0.0144977	0.0712252	24	18	43430.1	0.117189	1	23.0287	12	402747	0.0125346	0.0845006	23.5144	14.9444	367484	50315.7	0.136919	340317	357071	293605	355863	360359	332151	298475	338783	399611	448292	370734	392352	357295	438515	401070	395565	367504
1148	unkown1854	0.0210199	0.0924874	24	12	32165.2	0.1709	1	20	12	236702	0.0238132	0.132918	22	12.1	187350	53612	0.28616	169184	150668	159795	177602	198891	184008	125554	197358	241459	226392	235892	243067	103498	162435	172216	198974	184187
1158	unkown1875	0.00267199	0.0224826	24	12	97487	0.230298	1	25.5652	6	857436	0.00516486	0.0443679	24.7826	9.10381	777393	109230	0.140509	662868	599845	590993	730667	1059764	827471	722846	819663	878222	916923	855628	772766	751086	735937	765213	811154	781315
1162	unkown1881	0.0419656	0.142411	18	15	44261	0.269216	1	20	12	129010	0.0619476	0.256507	19	13.6167	95414.4	48456.9	0.507857	108171	82916	53975	157778	59462	44922	55072	55436	94838	156669	126668	137865	90958	88977	95439	109976	94945.1
1169	unkown1888	0.0210199	0.0924874	24	15	214629	0.250356	1	23.1496	12	1.76063e+06	0.0328753	0.167156	23.5748	13.4773	1.5105e+06	301431	0.199557	1421387	1168511	1124026	1404362	1783800	1484507	1055175	1528457	1751418	1831196	1763839	1696065	1259335	1505204	1646895	1708686	1.5083e+06
1179	unkown1901	0.0210199	0.0924874	18	15	24659.5	0.514768	1	20	12	91901.2	0.0597968	0.250629	19	13.6167	60287.8	38192.6	0.633504	59470	56436	52230	77363	50052	16223	58195	22262	68250	101811	69044	128500	20577	58840	78214	41220	59917.9
1190	unkown1913	0.0065055	0.0420944	18	9	41091.2	0.187729	1	25.8651	12	294046	0.00941338	0.0683645	21.9326	10.5709	269872	34084.1	0.126297	236087	204131	188055	245491	346265	286590	239325	290523	292521	277032	321447	285183	252357	256599	271402	277645	266916
1199	unkown1924	7.77e-06	0.000673899	18	6	109771	0.0788149	1	20	6.00001	274359	9.37e-06	0.000963148	19	6.01667	176312	101029	0.573016	116152	92853	140228	129802	294628	268149	261617	273043	94391	112070	115592	71848	183417	142894	174121	154300	164069
1201	unkown1927	0.0210199	0.0924874	18	6	39920.1	0.410786	1	20	6	171023	0.0496664	0.221376	19	6.01667	136189	31319.2	0.229968	161635	153299	88741	111992	200012	163008	110137	210936	107734	105191	64809	76268	131716	152753	132784	147286	132394
1211	unkown1940	0.0210199	0.0924874	18	9	28422.5	0.243283	1	22.7907	5.99999	240809	0.0320931	0.164104	20.3953	7.78353	212081	32969.3	0.155456	153208	184014	177576	216004	263208	234417	191073	274539	248212	214518	220844	194046	166441	200672	189937	183524	207015
1222	unkown1963	0.0419656	0.142411	24	9	31415	0.540432	1	21.8859	6	345528	0.108551	0.377078	22.9429	7.4467	304453	40297.9	0.132362	282704	308143	227094	309038	347377	394338	247016	393380	288956	317734	312697	326275	256812	272450	252355	305949	302645
1236	unkown1979	0.0419656	0.142411	24	12	25282.2	0.437483	1	20.3695	12	245068	0.0917524	0.33974	22.1848	12.0809	211458	35704.8	0.16885	169804	207482	170575	198899	211423	242185	145663	228470	211201	230510	251274	287286	192458	203192	183931	217903	209516
1244	unkown199	0.0210199	0.0924874	24	12	45949.6	0.24656	1	25.5652	12	373814	0.0324561	0.165398	24.7826	12.012	334920	56053.8	0.167365	327708	259076	227762	278970	444932	342249	313834	368739	363078	353477	401521	377178	278130	322306	360822	362201	336374
1260	unkown2005	0.0419656	0.142411	18	15	32315.1	0.911748	1	20	12	168325	0.163122	0.49242	19	13.6167	136799	47286.5	0.345665	178708	131559	155525	149872	98263	113884	114468	101083	176674	144303	209026	143296	100370	92508	115239	156674	136341
1261	unkown2006	0.0144977	0.0712252	18	12	62320.5	0.217312	1	20	12	642182	0.0212982	0.122363	19	12.0333	574131	76342.7	0.132971	567065	528895	520896	511017	598260	628386	458786	577376	613123	627212	633670	694723	483974	513500	523809	561114	565113
1272	unkown2019	0.000320124	0.0059414	24	12	118956	0.0315133	1	23.9024	12	600768	0.000126144	0.00482126	23.9512	12	496857	139993	0.281758	384592	438218	385038	372547	533025	545253	474227	648040	561258	614209	602663	624940	411031	416203	415946	518954	496634
1277	unkown2029	0.000320124	0.0059414	18	15	1.31673e+06	0.0850433	1	20	12	7.39147e+06	0.000313391	0.00805876	19	13.6167	5.6656e+06	1.94991e+06	0.344166	5793791	5409966	4761962	6101721	4977516	4170684	4639358	4220713	7599118	7027610	6694617	8244552	4302764	5227495	5801504	5374124	5.64672e+06
1279	unkown2031	0.0419656	0.142411	24	12	82359	0.277975	1	22.3291	12	547832	0.0635896	0.26143	23.1646	12.0156	436609	122358	0.280245	394150	286981	278600	407685	633413	413276	363947	358305	470618	665342	555504	499866	348092	370846	436061	451012	433356
1284	unkown2038	0.0419656	0.142411	24	15	174258	0.460676	1	22.7907	12	1.31361e+06	0.0956181	0.347986	23.3953	13.4702	1.04603e+06	355905	0.340245	987800	668293	726185	869835	1717267	972144	779481	819274	1181037	1592248	1300770	1180368	861699	925376	984945	1111761	1.04241e+06
1298	unkown2055	0.0144977	0.0712252	24	12	100954	0.128475	1	23.9024	12	526132	0.0135705	0.0896876	23.9512	12.0001	435741	126970	0.291389	364322	330747	282126	413371	527675	433489	521157	476777	444090	635251	485874	539312	274812	350049	489771	399800	435539
1304	unkown2063	0.0210199	0.0924874	24	12	44244	0.187853	1	23.52	12	123904	0.0258019	0.139696	23.76	12.0012	83659.9	54411.5	0.65039	63071	60461	26203	50979	152345	85933	125087	46921	68590	132187	140192	154645	63921	72781	29319	59129	83235.2
1312	unkown2071	0.00980952	0.0546185	24	21	44105.4	0.25158	1	25.7143	6.63e-05	441314	0.017286	0.105847	24.8571	23.3036	437982	57355.6	0.130954	421158	421844	459363	462893	375481	376163	413737	446552	316555	395744	447832	435978	543085	490196	456648	512386	435976
1315	unkown2074	0.0144977	0.0712252	18	0	45830.4	0.139752	1	24.2975	17.9999	268743	0.0145912	0.0948215	21.1488	18.408	240978	42389.1	0.175904	267580	267990	320088	285692	166498	184706	278619	221068	240779	203575	225767	202576	258804	264991	275456	275723	246244
1328	unkown2090	0.0419656	0.142411	18	15	103114	0.65794	1	20	12	280725	0.126721	0.418691	19	13.6167	253160	80001	0.31601	365821	329937	222522	316792	171012	152761	190429	162559	187013	250311	344844	340731	274890	227437	210622	290475	252385
1331	unkown2095	0.0419656	0.142411	24	15	55094.9	0.480855	1	22.7907	12	407460	0.0989414	0.35641	23.3953	13.4702	343595	78555.4	0.228628	324872	281708	255203	283840	378702	280886	323678	354780	495069	411298	329336	394139	210133	369211	406844	385037	342796
1333	unkown2098	0.0419656	0.142411	18	12	194047	0.190709	1	20	12	1.17015e+06	0.046642	0.213126	19	12.0333	958082	231836	0.241979	813276	815631	744004	980137	1088498	981396	684029	864082	1286323	943857	1267494	1182911	764551	783106	895035	796784	930695
1340	unkown211	2.22e-07	6.26e-05	18	6	921812	0.11033	1	20	6.00001	2035602	4.54e-07	0.000177483	19	6.01667	1.18513e+06	873437	0.736996	687341	658654	747981	681605	2209775	2319365	1761344	1851924	388483	450649	469730	459793	1507186	965654	945198	1163923	1.07929e+06
1341	unkown2110	0.00267199	0.0224826	24	0	85231.1	0.0905501	1	23.9024	6.63e-05	296323	0.00225661	0.0253167	23.9512	3.32e-05	226386	109185	0.482297	239563	331384	293293	321053	137350	153690	203979	221320	163636	83495	202724	148967	389931	276431	240870	217287	226561
1342	unkown2111	0.00980952	0.0546185	24	12	146971	0.0628648	1	20	12	1285481	0.00517462	0.0443679	22	12.1	1.08288e+06	224154	0.206999	992330	932940	880335	1005736	1224767	1055160	910940	1044099	1190998	1280488	1295670	1374768	875370	953756	1048786	1048346	1.06966e+06
1343	unkown2112	0.00164724	0.0165458	18	3	23484.8	0.0285126	1	24.2975	6.63e-05	369442	0.000515045	0.0109054	21.1488	1.76243	327267	76149.1	0.232682	302101	399740	371691	404237	271123	284067	285736	290345	300167	286398	268723	267182	410043	377883	427057	377906	332775
1344	unkown2113	0.0419656	0.142411	24	12	247447	0.183608	1	20	12	1991886	0.0451976	0.208901	22	12.1	1.63487e+06	400552	0.245006	1386851	1317619	1318830	1657231	1886872	1489472	1371632	1634941	2225997	1929381	1638320	2173846	1153200	1390864	1697023	1507686	1.61124e+06
1346	unkown2116	0.00421867	0.0314483	18	3	111314	0.134753	1	24.0327	6.63e-05	723713	0.00481645	0.0419957	21.0163	1.75139	646276	141153	0.21841	704350	737595	715375	737536	483576	676289	495728	706131	486593	495883	670016	549549	828401	809528	679794	739107	657216
1353	unkown2122	0.000572095	0.00854353	24	12	50932	0.0989471	1	21.8859	12	213515	0.000610189	0.0116608	22.9429	12.0255	149067	76733.4	0.514756	93224	128024	95576	74404	146530	216384	143006	130169	182823	230667	279883	160688	73638	122127	131934	135134	146513
1371	unkown2145	0.0299489	0.115346	18	3	152007	0.917551	1	28	6.00001	2.12786e+06	0.12625	0.418006	23	4.38095	2.12461e+06	99832.4	0.0469885	2391055	1712383	1777118	2317385	1972142	2156109	2257602	2125604	1867158	2030811	1553388	2027638	2260305	2553727	2472327	2496437	2.1232e+06
1382	unkown216	2.22e-07	6.26e-05	18	6	1.88871e+06	0.15125	1	20	6	5.14411e+06	6.11e-07	0.000177483	19	6.01667	2.8486e+06	2.39063e+06	0.839228	1451251	1470242	1427891	1401399	5131634	6980751	3562644	4901410	892135	1070302	1295838	891088	3067779	2318292	1909227	3170587	2.5589e+06
1391	unkown2175	0.0419656	0.142411	24	0	31772.8	0.38458	1	22.6735	6.63e-05	182426	0.0827374	0.313831	23.3368	3.41e-05	154151	44945.9	0.291571	173936	188058	202216	165494	121600	139206	189790	120903	157427	51121	145221	114883	226553	148539	159961	178205	155195
1406	unkown2192	0.00421867	0.0314483	18	12	34623.1	0.107612	1	22.9091	12	104429	0.00394848	0.0370222	20.4545	12.1753	64940.3	49179.8	0.757308	41734	32723	14433	20287	101345	43057	78980	77708	91360	83571	146385	96400	18250	91107	16250	13701	60455.7
1416	unkown2203	0.00980952	0.0546185	24	12	34260.4	0.118304	1	23.9024	12	180900	0.00900425	0.066699	23.9512	12	146425	38925.5	0.26584	106181	107525	99230	137412	165527	153495	122059	170248	176234	188023	182287	177056	140291	103702	124297	188234	146363
1418	unkown2205	0.0299489	0.115346	18	3	15447.8	0.472374	1	20	6.63e-05	85804	0.0743889	0.289969	19	1.58336	79305.3	25458	0.321012	73612	103573	72847	93184	78815	97246	84636	80598	50980	31269	55702	86106	116947	122776	95399	94275	83622.8
1420	unkown2208	0.0299489	0.115346	18	0	37095	0.298767	1	20	17.9999	348815	0.0511485	0.224924	19	18.05	314477	38665.1	0.122951	282875	350075	400542	380654	247971	250556	285727	320177	299951	305098	302809	344351	315122	343599	373836	362705	322878
1439	unkown2233	0.0065055	0.0420944	18	15	1.03718e+06	0.155035	1	20	12	5.23222e+06	0.00796698	0.0608482	19	13.6167	3.90802e+06	1.48682e+06	0.380453	4017829	3333289	3454719	4410710	3468157	2533081	2944030	3264897	5529443	5498160	4748354	5152929	2237795	3543211	4105147	4056146	3.89362e+06
1443	unkown2238	0.0299489	0.115346	18	15	9.95394e+06	0.60312	1	20	12	1.07795e+08	0.090565	0.337004	19	13.6167	9.52857e+07	1.53737e+07	0.161343	97361736	87443725	90248751	106522109	93645020	71202489	87216370	87365258	115584087	112382422	96490806	106721306	71884321	91700220	105379580	101041182	9.51368e+07
1446	unkown2240	0.0419656	0.142411	18	15	48246.2	0.189012	1	20	12	416287	0.0462979	0.211983	19	13.6167	352573	64875.1	0.184005	296600	357136	296275	372037	330136	283120	287219	338052	439391	453649	354881	417228	288344	345805	407857	363390	351945
1449	unkown2245	0.0299489	0.115346	18	12	72256.1	0.635875	1	20	12	486232	0.0944764	0.345571	19	12.0333	388525	116080	0.298771	278231	364777	371833	397493	382819	367602	177507	555951	492105	468375	529372	455076	297152	317373	333371	207951	374812
1457	unkown2260	0.0299489	0.115346	18	3	40998.9	0.220429	1	20	4.28e-05	371541	0.0397447	0.18948	19	1.58335	334519	59108.1	0.176696	350816	354140	372252	408956	291428	307246	310250	413861	320969	225553	293975	301959	399939	364922	396683	399746	344543
1459	unkown2262	0.0144977	0.0712252	24	0	24308	0.524029	1	25.8651	6.63e-05	99697	0.0446715	0.207059	24.9326	3.2e-05	71501.4	25200.4	0.352447	51479	94070	128280	124960	50890	52980	50203	68734	45715	48392	33449	93412	93895	54851	80048	61604	70810.1
1461	unkown2265	0.00267199	0.0224826	18	15	120915	0.105137	1	20	12	643599	0.00257816	0.0276211	19	13.6167	543784	135621	0.249402	625110	538513	465880	547651	365431	446336	454826	432892	654351	713137	666204	540705	499066	515003	594421	620001	542470
1466	unkown2271	0.00164724	0.0165458	24	12	124518	0.0397631	1	20.9501	12	801712	0.000696486	0.0126151	22.4751	12.0555	663323	165141	0.248961	551616	613006	464477	599587	697111	689194	641893	686575	775664	795291	792078	843816	557160	508285	701344	572660	655610
1493	unkown2315	0.0144977	0.0712252	24	12	148113	0.282796	1	23.3952	12	1.12879e+06	0.0266362	0.143181	23.6976	12.0019	977632	183073	0.187262	849932	823022	821061	868249	1230265	1051847	710867	1082713	1299743	1128683	1066500	1020220	841773	906111	919830	992544	975835
1495	unkown2317	0.00980952	0.0546185	18	12	17939.3	0.139847	1	24.8451	12	241821	0.0104144	0.0738507	21.4225	12.3143	212567	49336.4	0.232099	175847	227046	182117	192250	266858	243119	219108	220356	258778	205375	222601	280531	190889	142301	128580	192049	209238
1511	unkown2331	0.0299489	0.115346	18	12	54345.4	0.465841	1	20	12	235916	0.0735544	0.288602	19	12.0333	156105	92517.6	0.592662	141760	111731	124633	181349	166356	75072	148160	105310	324853	216549	175805	226458	64761	17773	157537	84704	145176
1537	unkown2366	0.00980952	0.0546185	24	0	42607.4	0.119488	1	24.2975	17.9999	160648	0.00908269	0.0670424	24.1488	21.0192	138928	42758.5	0.307776	197594	170583	142983	195875	65542	104179	137935	123292	120198	95406	136931	85026	198036	158301	125953	160303	138634
1546	unkown2381	0.0299489	0.115346	24	12	142197	0.321603	1	22.7907	12	1043383	0.0543485	0.233218	23.3953	12.008	879196	186411	0.212025	810892	747073	717579	670033	911289	872789	765513	1050632	1281533	1063152	1028412	800435	698012	733312	1029560	828975	875574
1547	unkown2382	0.00267199	0.0224826	24	12	37482.3	0.0796238	1	25.5652	12	130052	0.00201167	0.0241294	24.7826	12.012	98236.2	45990	0.468157	63864	14472	50385	68846	153769	121195	99889	123984	132520	160504	110360	116822	84344	72242	125685	91990	99429.4
1552	unkown2391	0.0144977	0.0712252	24	15	521654	0.102943	1	20	12	6923704	0.0112042	0.0776206	22	13.475	6.08825e+06	1.04648e+06	0.171885	5910440	5601409	5899353	5182519	5518731	5851877	4897837	6359771	7614556	6493904	6957026	6629330	5706024	5911886	6346892	6080100	6.0601e+06
1576	unkown2422	0.0065055	0.0420944	18	3	362128	0.121083	1	23.9024	6.63e-05	7.16866e+06	0.00641695	0.0524283	20.9512	1.74596	6.71262e+06	849001	0.126478	7289286	7005637	7134167	7245577	6383584	6239826	6790641	6230831	5498453	6782597	5734337	6488073	7201152	6716130	8133806	7615927	6.78063e+06
1599	unkown2447	0.0144977	0.0712252	18	0	42482.3	0.261977	1	26.9725	17.9999	78380.9	0.0249657	0.13657	22.4862	18.7461	81637.3	32390.4	0.39676	151509	136476	135765	100501	34906	75896	42168	80296	94256	33543	90504	50280	57888	74478	98332	82826	83726.5
1621	unkown2475	0.0144977	0.0712252	18	6	62419.1	0.688503	1	20	6	792185	0.0559675	0.238576	19	6.01667	731707	55458.4	0.0757931	789890	703815	667425	691155	852232	697927	876798	741784	585674	655671	602492	696407	791501	706515	684449	856053	724987
1630	unkown2487	0.0299489	0.115346	18	12	24603.1	0.765506	1	25.5652	12	289310	0.109483	0.37953	21.7826	12.3731	227430	87705	0.385635	189539	249270	193533	253957	192993	185072	282177	262208	275293	315089	174514	392345	102497	185961	137971	164927	222334
1633	unkown249	2.22e-07	6.26e-05	18	6	2.50196e+06	0.0990295	1	20	6.00001	6433469	4.1e-07	0.000177483	19	6.01667	3.63041e+06	2.88642e+06	0.795068	1773147	2116397	2135080	2029347	7396154	7353307	4762183	6222232	1229543	1364841	1637829	1219413	4089646	2803728	2873356	3483860	3.28063e+06
1641	unkown2501	0.0210199	0.0924874	18	9	48238.5	0.360584	1	24.1644	6	269416	0.0445847	0.207059	21.0822	7.88789	230038	46773.1	0.203328	225164	214288	127116	142329	305140	292696	196635	283195	233673	230570	274569	237381	197384	180650	194182	250047	224064
1644	unkown2504	0.00421867	0.0314483	18	6	84908.7	0.665584	1	20	5.99998	204454	0.0193051	0.113367	19	6.01666	140636	64068.1	0.45556	193163	62725	80039	75747	189315	264297	132175	232027	19845	62600	24779	81906	171509	170566	124550	240714	132872
1658	unkown2518	0.0210199	0.0924874	18	12	29979.9	0.789864	1	20	12	201154	0.0846443	0.320257	19	12.0333	163369	46120.6	0.28231	206724	172297	156300	137781	125237	146010	148012	151800	190356	207045	231706	175511	130482	122426	92785	132251	157920
1674	unkown2540	0.0144977	0.0712252	24	15	197780	0.150129	1	20	12	1.69046e+06	0.0155187	0.098855	22	13.475	997161	904193	0.906767	791692	700763	616264	635174	897098	832563	389143	714421	2305936	961087	1174782	2320026	761835	816878	682651	965179	972843
1676	unkown2542	0.0299489	0.115346	24	12	1.15034e+06	0.294784	1	24.0327	12	6.15447e+06	0.0505851	0.223446	24.0163	12	5.26134e+06	1.24792e+06	0.237186	4893466	4239124	3983194	4274231	6194185	5963079	4313416	6727474	7426398	5980817	6156212	5054459	3586516	4242083	5277463	5879987	5.26201e+06
1678	unkown2546	0.0419656	0.142411	18	15	58758.8	0.327948	1	20	12	411930	0.072746	0.287038	19	13.6167	334999	93072.1	0.277828	338030	359658	300219	322861	324695	232276	258547	258454	512134	401089	387345	347152	237229	303315	370072	392489	334098
1681	unkown2549	0.00267199	0.0224826	18	15	84925.6	0.0947816	1	20	12	441097	0.0023505	0.0259822	19	13.6167	350878	116006	0.330616	378958	363295	300148	344849	233126	292374	224561	274084	531898	376674	463775	392042	296001	346892	376659	400732	349754
1691	unkown256	0.0210199	0.0924874	18	3	84798.5	0.452241	1	27.1385	6.63e-05	1.90502e+06	0.0537646	0.231815	22.5692	1.8808	1.9309e+06	309442	0.160258	1873898	2019342	1884858	1841996	1655973	2002141	1620100	2191619	1692858	1901719	1826324	1612235	2268624	2196864	2165407	2272435	1.93915e+06
1717	unkown2589	8.77e-05	0.00272746	24	12	140580	0.0112276	1	23.9024	12	300638	1.46e-05	0.00131709	23.9512	12	176497	179851	1.01901	38288	53005	62662	84415	269723	274973	224386	262470	345852	235103	274691	346904	82338	112953	63920	87681	176210
1725	unkown2597	0.00980952	0.0546185	24	12	54071.6	0.148657	1	24.5682	12	459316	0.0109814	0.0764293	24.2841	12.0016	401533	69089.4	0.172064	350193	343712	295221	359553	490052	401228	389105	403896	524025	433107	426709	453425	333459	404708	456573	369908	402180
1753	unkown2622	0.0065055	0.0420944	18	3	23360	0.127446	1	23.2718	6.63e-05	159560	0.0067117	0.0539568	20.6359	1.71969	133850	40244.5	0.300669	131246	200981	169310	136705	106081	98965	142622	143350	119703	88603	95051	112332	174847	169805	145074	166906	137599
1758	unkown2627	0.0419656	0.142411	18	3	20655.1	0.553077	1	20	5.16e-05	316324	0.110554	0.38176	19	1.58336	299679	33586.6	0.112075	287202	373575	307062	297457	292684	269417	287466	339228	257107	239974	289489	304550	333017	345810	322255	339715	305376
1759	unkown2628	0.0299489	0.115346	18	15	24348.2	0.705671	1	20	12	237709	0.102646	0.361743	19	13.6167	206610	39426	0.190823	202937	193620	219609	232419	206205	180299	147584	200127	202988	225302	260795	261751	179566	181955	203097	201399	206228
1787	unkown2660	0.0299489	0.115346	18	9	84365.6	0.680598	1	20	6.00002	351768	0.0997359	0.3571	19	7.60001	285518	74062.8	0.259398	224560	213891	179781	162088	378496	474796	207627	346153	229263	285326	381078	238383	327428	193182	226410	266881	270959
1796	unkown2671	0.0144977	0.0712252	24	15	60988	0.121562	1	23.52	12	529668	0.0129377	0.0869585	23.76	13.4862	455719	87133.8	0.191201	490373	355264	338684	356724	423680	479328	406410	444204	472628	574784	565605	505654	447806	436466	475861	512214	455355
1809	unkown2689	0.0065055	0.0420944	24	15	683228	0.0503673	1	26.8085	17.9999	8.02278e+06	0.00295668	0.0297955	25.4043	16.4674	7.45249e+06	418024	0.0560919	6808327	7132194	6546820	7035853	6856743	6952474	6747143	7485920	7545451	8087155	7963283	7870857	7847982	7851266	7593690	8798196	7.44521e+06
1819	unkown27	0.0065055	0.0420944	18	6	144030	0.826216	1	20	5.99999	404384	0.0334644	0.168631	19	6.01666	247131	180553	0.730596	109411	50537	43083	166151	475231	266534	602304	273465	102010	187459	38779	179405	354839	338553	211566	204704	225252
1828	unkown2713	0.000987235	0.0119368	18	6	113117	0.684255	1	20	6	341458	0.00560684	0.0471769	19	6.01667	255075	86154.7	0.337762	213678	94833	234664	273461	382235	432312	253265	298018	89969	176678	109836	92172	360173	251980	241562	409318	244635
1841	unkown273	0.0419656	0.142411	24	0	37761.4	0.365445	1	21.7778	7.63e-05	368253	0.0794035	0.304515	22.8889	4.01e-05	327984	51468.9	0.156925	378344	388745	402800	303125	338005	361691	288859	305975	211795	239288	324629	339521	344755	359402	325302	368903	330071
1845	unkown2735	0.00980952	0.0546185	18	9	80444.7	0.131431	1	20	6.00001	438763	0.00986767	0.0712051	19	7.60001	328934	89058.1	0.270747	292747	229079	180779	245567	506502	405850	475533	367167	252100	288538	285019	294955	286708	321484	302418	248392	311427
1853	unkown2746	0.0419656	0.142411	18	6	68743.9	0.862379	1	20	6	468334	0.156304	0.477597	19	6.01667	416485	50331.3	0.120848	453013	425722	298141	389127	412505	493208	466877	500748	316920	377160	394981	264205	448546	473274	334142	517604	410386
1870	unkown2764	0.0210199	0.0924874	18	6	47162.3	0.99373	1	20	6	160630	0.101695	0.360596	19	6.01667	130151	35536.8	0.273043	152973	65592	50338	111491	179067	169209	168575	125667	76358	89819	103353	79282	167383	136697	184508	153198	125844
1878	unkown2772	1.91e-05	0.00111825	18	0	38626.8	0.0322123	1	22.3291	17.9999	321155	9.41e-06	0.000963148	20.1646	18.2098	290946	41064.3	0.141141	311673	331985	352322	337273	242275	273313	249645	249489	289617	279465	279172	284944	326438	299008	326794	332381	297862
1907	unkown28	0.00164724	0.0165458	18	6	3.32003e+06	0.163481	1	20	5.99998	1.51032e+07	0.0024828	0.0268523	19	6.01666	1.26485e+07	1.9871e+06	0.157101	12846070	11101288	13110372	13081184	18421166	15742290	14778817	11470433	6720962	6489787	8060392	6589169	16486307	14168895	13319777	16136647	1.24077e+07
1914	unkown2806	0.0419656	0.142411	24	18	799259	0.226017	1	23.3952	17.9999	9.86239e+06	0.0536663	0.231815	23.6976	18.0029	9.06627e+06	670134	0.073915	10091337	8454683	8344499	8676315	8279455	8970792	7298275	8368369	9812606	8443218	9324104	9656690	9305353	9597745	10514103	10032387	9.07312e+06
1918	unkown281	0.0419656	0.142411	18	6	257097	0.971504	1	20	6	2.00125e+06	0.171225	0.504723	19	6.01666	1.82381e+06	188371	0.103284	1962675	1712292	1284051	1770088	1762352	2178358	1973038	2091247	1401066	1770802	1708676	1356576	1932090	1991508	1751274	2169718	1.80099e+06
1929	unkown282	0.0144977	0.0712252	18	6	111142	0.95661	1	20	6.00001	763815	0.0732005	0.288075	19	6.01667	692574	75652.2	0.109233	746663	667481	480671	638717	695363	787203	743623	829071	578210	677075	584105	448776	750189	779655	687365	840335	683406
1936	unkown2827	0.0299489	0.115346	18	6	17359.1	0.625617	1	20	6	246422	0.0932571	0.3425	19	6.01667	224152	20917.2	0.093317	231179	204844	205575	225344	225721	259772	212509	287685	222997	204448	187915	168467	236856	227631	221501	223432	221617
1937	unkown2828	0.00980952	0.0546185	24	21	51152.3	0.211637	1	25.7143	17.9999	610370	0.0149004	0.0959751	24.8571	19.575	533881	61579.5	0.115343	502541	535540	584813	500660	493412	473991	438110	497305	524638	405633	577267	532155	639923	556588	675814	569156	531722
1968	unkown2862	0.0144977	0.0712252	24	18	20474.1	0.481507	1	23.6461	17.9999	258909	0.0416374	0.197046	23.8231	18.001	234465	23242.1	0.0991282	227745	241999	241032	220846	199323	177691	225787	234044	252523	242075	180467	274475	269271	250731	243457	272176	234603
1971	unkown2866	0.0299489	0.115346	24	21	66627.5	0.317143	1	23.52	17.9999	579252	0.0537275	0.231815	23.76	19.4868	521008	73407.7	0.140896	561573	550662	580503	551065	424034	431683	472479	486387	559888	474274	384879	553879	688846	472742	569811	585612	521770
1974	unkown2870	0.0299489	0.115346	24	21	51320.7	0.282767	1	20.3695	18	358875	0.0488754	0.218679	22.1848	19.5078	314354	50665.8	0.161174	322141	374065	363738	341539	262984	196427	273366	289839	335409	298229	231350	372747	416495	299783	389414	329809	318583
1992	unkown2891	0.0419656	0.142411	18	9	87750	0.197562	1	20	6	620107	0.0480255	0.216914	19	7.6	261716	243292	0.929603	220079	23032	31857	25343	929710	81122	731750	737846	54767	36071	56505	35622	25511	41347	377698	13983	213890
1993	unkown2892	0.0210199	0.0924874	24	15	31224.4	0.453562	1	25.7143	12	160414	0.0538938	0.23215	24.8571	13.5679	126168	45370.1	0.359602	67793	67046	72716	113808	230229	131866	101812	85766	111326	198759	183300	148271	131939	139659	111082	134847	126889
2001	unkown29	0.0065055	0.0420944	18	6	1.14154e+07	0.144551	1	20	6.00002	4.92033e+07	0.00749406	0.0581725	19	6.01667	4.07802e+07	6.88877e+06	0.168924	41781498	35465754	42001877	41672570	58369281	50962615	47882580	39598882	20986929	21711117	26328262	18248423	52824734	47306111	41653286	52332475	3.99454e+07
2006	unkown2904	0.0065055	0.0420944	18	12	21653.4	0.37289	1	25.2722	12	182510	0.0170332	0.104945	21.6361	12.3488	147985	50252.7	0.33958	118333	166666	124043	156071	126566	165055	148223	176392	195932	154362	176091	203653	67709	130699	88423	119741	144872
2011	unkown291	0.0419656	0.142411	24	21	94166.8	0.377642	1	24.4321	17.9999	1.12614e+06	0.0815333	0.310047	24.2161	19.5149	1.03715e+06	96033.9	0.0925942	994833	1132663	978293	1190037	1000986	912916	962463	970283	926626	887121	1010619	1108937	1241117	1133617	1116506	1013313	1.03627e+06
2023	unkown2926	0.0299489	0.115346	18	9	47563.5	0.190111	1	23.52	5.99999	293658	0.0351207	0.174443	20.76	7.83795	255917	45460.3	0.177637	236998	159411	203106	241097	315099	253762	296743	309026	284891	286962	203914	302161	226508	225227	219154	228631	249543
2029	unkown2931	2.22e-07	6.26e-05	18	6	382246	0.103311	1	20	6	822012	4.26e-07	0.000177483	19	6.01667	470096	365187	0.776834	220079	255264	261903	288946	929710	888742	731750	737846	189588	148815	191700	193568	550008	372453	377698	475417	425843
2044	unkown2947	0.0419656	0.142411	18	15	24689.3	0.598562	1	20	12	161018	0.117661	0.399285	19	13.6167	136391	32629.8	0.239236	145743	155706	138410	115050	92710	139501	117218	98180	160915	177742	155637	149780	82898	141586	151790	154339	136075
2046	unkown2949	0.0210199	0.0924874	18	6	13461.2	0.921167	1	20	6.00001	176184	0.0957375	0.347986	19	6.01667	160993	16288	0.101172	164965	155608	144635	131668	162462	201565	160960	179747	136432	145536	148078	146015	180177	148358	158540	179554	159019
2061	unkown2963	0.0419656	0.142411	24	18	71815.5	0.301142	1	28	17.9999	651399	0.0678776	0.274063	26	18.1071	582417	37440.1	0.064284	516517	555461	464228	605007	540798	590814	521731	474701	497448	605633	653974	654917	708676	661603	570933	664384	580427
2072	unkown2973	0.0299489	0.115346	18	6	18784.1	0.94657	1	20	5.99998	120785	0.12936	0.421848	19	6.01666	105564	15933.3	0.150934	87214	113498	95154	78367	109207	157992	107562	108378	66648	104791	80931	62755	126320	107469	112880	138969	103633
2082	unkown2983	0.0299489	0.115346	18	15	16007.5	0.189482	1	20	12	108189	0.0350231	0.17425	19	13.6167	98458	17656.3	0.179329	121588	101227	99665	89009	79070	80144	90198	70115	102966	114175	114769	100847	114152	92682	101476	100509	98287
2090	unkown2990	0.00267199	0.0224826	24	21	25292.9	0.0888427	1	22.4427	18	313998	0.00221858	0.0252671	23.2214	19.4716	285997	25504.8	0.0891784	334094	288003	254540	295968	249171	256047	258303	251393	287728	293956	294725	270126	322657	299511	318120	315705	286878
2093	unkown2993	4.22e-05	0.00200244	18	6	737293	0.254612	1	20	6	2.16055e+06	0.000133617	0.00489928	19	6.01667	1.40009e+06	808964	0.577794	969366	772207	955006	763269	2181731	2593633	1667082	2199761	603858	936362	810262	644927	1785283	1339365	1216116	1394749	1.30206e+06
2101	unkown30	0.00267199	0.0224826	18	9	3.96854e+06	0.204619	1	20	6	1.47013e+07	0.00465361	0.0409119	19	7.6	1.01969e+07	3.8876e+06	0.381254	5903205	4109254	5119050	7848623	18249171	12717307	15305855	12532858	5982287	10338688	7752321	9733824	9230399	10366531	7404411	8329083	9.43268e+06
2125	unkown3022	0.0210199	0.0924874	18	9	52083.4	0.751067	1	25.4179	5.99999	275894	0.0812818	0.309351	21.7089	7.98947	234317	41383.1	0.176612	221288	184751	135494	170131	324226	317309	230439	231600	192203	261020	299109	207188	203239	229049	197488	276938	230092
2159	unkown3057	0.00421867	0.0314483	18	3	38705.4	0.273856	1	24.7059	6.63e-05	877034	0.00896909	0.066699	21.3529	1.77944	843060	85308.8	0.101189	874227	863245	879786	890880	822227	855715	712591	786058	930370	663597	800375	778713	972015	897880	902614	946891	848574
2169	unkown3068	0.000171384	0.00408964	18	6	359829	0.219927	1	20	6	1.18386e+06	0.000421625	0.00955541	19	6.01667	775376	435961	0.562258	507613	485131	519307	453244	1220929	1547017	918343	1049170	366596	593049	512682	439016	837532	614465	646455	850184	722546
2177	unkown3075	2.89e-06	0.000406746	18	6	725083	0.136735	1	20	6.00001	2215409	6.21e-06	0.000783522	19	6.01667	1.44464e+06	794704	0.550106	1047857	918478	1013515	987550	2368056	2626269	1690530	2176781	642180	996142	842320	688035	1610797	1275907	1226978	1461963	1.34833e+06
2186	unkown3085	0.0210199	0.0924874	24	15	34563.4	0.255284	1	23.9024	12	403111	0.0334179	0.168585	23.9512	13.497	364568	38855	0.106578	324468	340469	272846	368607	380931	357691	349479	277772	455429	372930	367540	416545	376584	384266	389767	397223	364534
2191	unkown3093	2.22e-07	6.26e-05	18	6	1.55184e+06	0.173047	1	20	6	4.56404e+06	6.94e-07	0.00018312	19	6.01667	2.34418e+06	2.27797e+06	0.971757	1035791	1243915	1213401	967205	7396154	4319761	2772358	3767873	593696	708860	922354	561753	2490997	1714509	1507344	1874153	2.06813e+06
2198	unkown31	0.0299489	0.115346	18	6	153822	0.368401	1	20	6	665890	0.0607582	0.253019	19	6.01667	483721	167542	0.34636	545509	502243	364768	347736	719938	941634	327718	674271	217512	331085	368638	208231	481031	423505	381143	579724	463418
2201	unkown3102	0.0419656	0.142411	24	21	135105	0.16992	1	23.0287	17.9999	3.81493e+06	0.0423808	0.199517	23.5144	19.4773	3.64378e+06	160004	0.0439114	3821827	3548901	3575435	3803155	3652195	3291100	3438180	3444352	3577947	3698755	3632191	3611189	3724384	3812139	4034539	3688655	3647184
2242	unkown3145	0.0299489	0.115346	24	21	62791.1	0.308153	1	20	17.9999	1695556	0.0524699	0.228416	22	19.525	1.63964e+06	62198	0.0379339	1731308	1684205	1586950	1731240	1523642	1633482	1534622	1517062	1706754	1565982	1656365	1672340	1722472	1581933	1760950	1716870	1.64539e+06
2244	unkown3147	0.00267199	0.0224826	24	21	160432	0.0943527	1	20.2759	17.9999	3.57448e+06	0.002341	0.0259409	22.1379	19.5118	3.44105e+06	138882	0.0403605	3515427	3554487	3423393	3619316	3289171	3264932	3167220	3330245	3540973	3349179	3326972	3568050	3579022	3429694	3631270	3657928	3.45295e+06
2275	unkown318	0.00980952	0.0546185	24	18	59762.7	0.23128	1	20.9501	17.9999	531428	0.0160821	0.101868	22.4751	18.0832	487547	36367.2	0.0745921	432766	435833	468849	576045	426593	414927	428337	426406	596333	453696	501866	547491	510494	496399	553889	564931	489678
2279	unkown3183	0.0299489	0.115346	24	21	20345.9	0.2803	1	20	17.9999	325473	0.0485226	0.217748	22	19.525	306005	19313.9	0.0631164	326430	318298	318019	306490	263259	279844	297936	263913	355929	270336	310272	312003	326954	299359	340114	335464	307789
2292	unkown3196	0.0419656	0.142411	24	21	89972.6	0.444248	1	22.3291	17.9999	1.76771e+06	0.0928852	0.341969	23.1646	19.4712	1.70354e+06	91317	0.0536044	1796687	1719722	1773518	1786726	1687621	1645826	1506904	1614905	1638215	1732662	1674234	1662999	1792110	1571521	1927871	1779323	1.70693e+06
2296	unkown32	0.00267199	0.0224826	18	6	457145	0.351485	1	20	6.00001	1.81734e+06	0.00748565	0.0581725	19	6.01667	1.41646e+06	393317	0.277675	1249866	1075181	951863	1650289	2096553	2002260	1540593	1629967	886329	876161	1110791	953413	1714465	1487919	1111283	1563874	1.3688e+06
2297	unkown320	0.0419656	0.142411	24	18	29434.2	0.236581	1	23.1496	17.9999	350975	0.055721	0.23775	23.5748	18.0058	320282	25755	0.0804135	313006	340536	281013	320601	277638	307399	312305	252640	374346	306943	319981	320196	370175	319209	351635	362883	320657
2300	unkown3203	0.000572095	0.00854353	24	21	25993.6	0.0515569	1	24.2975	17.9999	271103	0.00033717	0.00830949	24.1488	19.5099	247670	27751.9	0.112052	249160	282015	246810	266471	224676	229736	222321	232997	229923	238144	241952	211303	266709	253902	273404	290396	247495
2320	unkown3222	0.00980952	0.0546185	18	0	58474.9	0.359008	1	24.4321	17.9999	242461	0.0234151	0.131346	21.2161	18.4233	215208	53219.6	0.247294	315338	298100	249217	240182	141218	211602	178728	165988	207186	233175	231330	104613	185681	231214	241622	311330	221658
2322	unkown3224	0.0144977	0.0712252	18	15	56709.6	0.849965	1	20	12	381486	0.0664965	0.270317	19	13.6167	345305	67280.1	0.194842	465434	382424	321583	331527	329321	262702	279313	279012	428211	343293	358259	396179	396576	320528	308451	311648	344654
2333	unkown3234	0.00421867	0.0314483	18	6	236650	0.126122	1	20	6	685334	0.0045432	0.0402551	19	6.01666	409014	300117	0.733758	225851	201420	211275	179962	737808	790544	510176	702809	212544	353986	171042	243986	419750	373852	290692	336637	372646
2343	unkown3247	0.0299489	0.115346	18	6	20542.9	0.794534	1	20	6.00001	197874	0.112749	0.387575	19	6.01667	159708	37080.1	0.232175	135760	145335	144238	150388	156600	189094	162460	283342	162078	126655	143864	44186	151210	191583	131047	165594	155215
2345	unkown3249	0.0419656	0.142411	18	6	51659.1	0.572104	1	20	6	367592	0.113545	0.389421	19	6.01667	305696	56518.4	0.184884	316979	264804	289504	293493	309820	377571	307620	475355	293559	220436	262167	144264	221018	367058	284095	353810	298847
2353	unkown3261	0.00164724	0.0165458	24	0	58750	0.0739457	1	23.9024	6.63e-05	374318	0.00121966	0.0179984	23.9512	3.32e-05	323432	77571.7	0.239839	344844	372719	365705	414005	282537	293856	312954	261626	285166	264152	247888	282703	447800	334538	307938	358465	323556
2356	unkown3266	0.00267199	0.0224826	18	6	14266.9	0.323735	1	20	5.99998	71048.2	0.00696579	0.0555048	19	6.01666	61893.3	7570.97	0.122323	62295	52534	63750	62902	85377	68038	75235	55543	38178	38837	39984	32319	91142	64710	65232	79538	60975.9
2357	unkown3267	0.000171384	0.00408964	24	0	47858	0.0518625	1	23.2718	6.63e-05	302511	0.000112267	0.00460297	23.6359	3.37e-05	266073	68010.7	0.255609	275302	296709	294424	343612	232392	241501	260960	239209	231416	189483	207690	230431	336454	269801	283466	337789	266915
2358	unkown3268	0.000171384	0.00408964	18	3	12507	0.0581115	1	20	4.09e-05	115180	0.000124662	0.00482126	19	1.58335	101671	18762.5	0.184541	121410	108352	109818	121139	99183	102498	91032	104075	85977	73136	94797	92008	129039	114146	109051	121987	104853
2365	unkown3274	4.22e-05	0.00200244	24	0	39227.8	0.0107018	1	23.7736	6.63e-05	177370	7.05e-06	0.000822217	23.8868	3.33e-05	147011	49687.8	0.337987	169661	183692	179159	176968	130481	123743	133957	119507	119343	109633	102573	114124	188368	169133	161294	173518	147197
2366	unkown3275	0.00164724	0.0165458	24	0	25057	0.0464424	1	23.7736	6.63e-05	128632	0.000801602	0.0137461	23.8868	3.33e-05	109398	31157.1	0.284805	126266	144543	118940	124781	89272	93165	107312	92964	103595	83577	82283	81338	149187	119173	107737	128104	109515
2367	unkown3276	0.00267199	0.0224826	18	6	239415	0.68012	1	20	6	576766	0.0132851	0.0885906	19	6.01667	405900	161558	0.398023	446698	446125	203305	238970	621849	614204	735041	335970	84725	142996	173166	70501	921201	461047	265009	420359	386323
2368	unkown3277	0.000987235	0.0119368	18	6	700158	0.242823	1	20	5.99998	1.76754e+06	0.00223807	0.0253167	19	6.01666	1.20457e+06	543629	0.451307	1193066	1159676	783311	757036	1831759	1882619	1915828	1439973	511700	582434	569600	508074	2029741	1121994	918653	1013567	1.13869e+06
2369	unkown3278	0.000320124	0.0059414	18	6	1.49394e+07	0.256819	1	20	6	3.9138e+07	0.000855535	0.0143831	19	6.01667	2.6907e+07	1.19397e+07	0.44374	25939297	25446655	17015929	17265813	42730828	42832082	38920037	32068979	11117020	13603250	12898940	12197840	43660122	27919822	20626053	23120102	2.54602e+07
2374	unkown3284	0.000171384	0.00408964	18	6	2.35663e+06	0.31489	1	20	6	5799481	0.00058431	0.0114576	19	6.01667	3.3314e+06	2.4944e+06	0.748753	2807119	2701349	1133405	1382923	6115260	6237030	7331222	3514412	659200	1292383	1126845	600165	6154319	3126544	1694638	2589312	3.02913e+06
2375	unkown3286	0.000572095	0.00854353	18	6	313250	0.556824	1	20	6	744034	0.00288348	0.0294219	19	6.01667	455495	294742	0.64708	454615	316706	145431	199496	744972	845549	880191	505422	40615	162353	143117	84223	969040	508230	284020	432471	419778
2376	unkown3287	8.77e-05	0.00272746	18	3	1.36653e+06	0.252736	1	25.5652	6.63e-05	2.69293e+06	0.00025968	0.007185	21.7826	1.81525	2.49768e+06	3.12646e+06	1.25174	3406834	3543211	1978293	1843392	2712864	2723281	2609776	1281709	343419	436782	519159	336906	6912996	4812043	4527768	4457792	2.65289e+06
2377	unkown3288	8.77e-05	0.00272746	18	3	2.43046e+07	0.241793	1	25.4179	6.63e-05	4.93284e+07	0.000249375	0.00707346	21.7089	1.80911	4.51788e+07	5.64961e+07	1.2505	64032761	64322228	36086505	32872199	47996993	49950762	46546741	24077001	6177719	7880600	8996631	5438797	124604129	85746923	82949855	82270211	4.81219e+07
2379	unkown3291	0.000572095	0.00854353	18	3	5.10932e+06	0.383113	1	20	6	7.84878e+06	0.00206588	0.0245188	19	4.43333	7.68916e+06	5.32363e+06	0.692356	9907611	9584188	5814868	4387873	8222484	10161746	8262548	4748361	731228	972069	1322774	587411	20035132	13698303	10914756	12541265	7.61829e+06
2381	unkown3299	0.00421867	0.0314483	24	21	329183	0.0474495	1	24.1644	17.9999	1.58906e+06	0.00190492	0.0232194	24.0822	19.5053	1.29733e+06	351227	0.27073	1408173	1357921	1484304	1663525	1150603	974526	1241545	840937	1052309	1011903	947860	1247809	1850530	1357658	1573567	1574498	1.2961e+06
2382	unkown33	0.000572095	0.00854353	18	9	162795	0.157379	1	20	6	556232	0.000928744	0.0151762	19	7.6	389950	152439	0.390921	229710	174843	183531	291456	621173	535901	581763	486093	191342	425138	335207	407038	366133	366112	239331	324967	359984
2390	unkown3309	0.0299489	0.115346	18	6	608470	0.991107	1	20	6	9610051	0.134082	0.431012	19	6.01667	9.21939e+06	448448	0.0486419	8858368	9264999	8078192	8753373	9905120	10208349	9150420	9176315	7418610	8573539	8880916	8401350	11096566	9876409	9779908	9218327	9.16505e+06
2402	unkown3326	0.00421867	0.0314483	18	9	26659.2	0.230046	1	20	6	254437	0.00770346	0.059389	19	7.6	227449	26990.2	0.118665	216750	196644	192285	186408	246880	284162	228339	258368	209080	230536	239679	211790	202464	233376	201170	216361	222143
2412	unkown3336	0.00267199	0.0224826	18	0	251343	0.158393	1	24.9858	17.9999	1.76989e+06	0.00371067	0.0354558	21.4929	18.4883	1.6769e+06	221688	0.132201	1945112	1988043	1709702	2141954	1581007	1494159	1748288	1295905	1587233	1660048	1356676	1628316	1815277	1817185	1644899	1802200	1.701e+06
2419	unkown3344	0.0419656	0.142411	18	0	63126.4	0.449532	1	20	17.9999	318834	0.0937671	0.343658	19	18.05	279468	59537.7	0.21304	408497	366027	268544	367214	156384	203934	347219	176724	218195	286397	296891	307102	338087	311255	284225	341769	292404
2425	unkown335	0.0210199	0.0924874	24	21	24469.1	0.321755	1	22.7907	18	351886	0.0405542	0.192526	23.3953	19.4742	324942	23774.2	0.0731644	315460	316597	344868	343180	330337	259583	314520	275009	375656	305748	305487	315201	340222	353097	353401	360826	325574
2429	unkown3353	0.00980952	0.0546185	18	0	151434	0.215937	1	24.1644	17.9999	1.402e+06	0.0151606	0.0971224	21.0822	18.3931	1.29904e+06	159993	0.123163	1426381	1440177	1369743	1630256	1212315	1181733	1359319	977455	1231502	1310986	1072919	1289524	1435467	1411013	1251481	1510039	1.31939e+06
2432	unkown3356	0.0299489	0.115346	18	0	2.28573e+06	0.420736	1	20	17.9999	1.46842e+07	0.0677158	0.273808	19	18.05	13527556	2.08355e+06	0.154023	16800977	16768049	13688115	17798175	12305335	10104202	14302362	8326813	10732346	15114736	14297829	14708427	13868492	14895234	15341006	14632158	13980266
2433	unkown3357	0.0419656	0.142411	18	3	112955	0.372057	1	20	6.63e-05	1.02116e+06	0.0805601	0.307382	19	1.58336	946266	120808	0.127668	1109263	1002762	1166088	806511	985117	1031560	981981	905564	863408	793373	857418	796787	1134001	930975	1005269	1097993	966754
2434	unkown3358	0.0299489	0.115346	18	3	13439.3	0.377116	1	20	6.63e-05	97461.7	0.0619315	0.256507	19	1.58336	89009.8	15277.6	0.171639	106813	95255	105473	82306	88560	110256	80657	90984	85325	67053	71636	73079	92670	88626	119880	107039	91600.8
2436	unkown336	0.0419656	0.142411	24	18	50518.7	0.356254	1	21.7778	17.9999	893284	0.0777872	0.299079	22.8889	18.0425	829731	64995.4	0.078333	845590	804683	851667	854171	829231	711195	735139	738245	961265	808772	736020	869136	840237	858369	987399	887132	832391
2455	unkown3379	0.0210199	0.0924874	18	0	65793.8	0.144278	1	24.1644	17.9999	434357	0.0206173	0.119363	21.0822	18.3931	392082	63153.1	0.161071	460548	408431	485360	477547	349454	347944	410323	293475	381182	340647	297457	412081	483082	430154	447762	376433	400118
2458	unkown3381	0.0299489	0.115346	18	6	49305	0.998045	1	20	6.00001	423429	0.134812	0.431186	19	6.01667	392888	36197.6	0.0921322	379775	381488	331783	326207	436291	448527	399780	409118	300110	343687	414645	318726	444230	461486	397002	423172	388502
2460	unkown3385	0.0299489	0.115346	24	0	208596	0.108281	1	24.0327	6.63e-05	1.50888e+06	0.0218289	0.124776	24.0163	3.31e-05	1.35683e+06	243413	0.179397	1442066	1612487	1523185	1457788	1051115	1256036	1295480	1274809	1184240	1110533	1123886	1401787	1697281	1267813	1522106	1486668	1356705
2462	unkown3387	0.00267199	0.0224826	18	0	221523	0.210052	1	20	17.9999	1.71133e+06	0.00476246	0.0417062	19	18.05	1.58871e+06	196851	0.123906	1852337	1854544	1635763	2008957	1398352	1492329	1284660	1415464	1608633	1351828	1582528	1773078	1735272	1556991	1841839	1711201	1631486
2471	unkown3395	0.0144977	0.0712252	24	21	17975.7	0.171934	1	23.9024	17.9999	166656	0.0174346	0.106257	23.9512	19.497	149056	19339.8	0.129749	141330	162693	141552	181856	130246	138600	133560	122339	145295	141629	150903	128908	161999	144973	177109	182544	149096
2486	unkown3411	0.0299489	0.115346	18	3	51038.6	0.445239	1	24.5682	6.63e-05	969130	0.0709047	0.282009	21.2841	1.77371	923825	107357	0.11621	949128	933746	907070	1086578	700161	905695	1025255	868373	975616	781148	835105	833301	1000445	992131	1057561	1045286	931037
2491	unkown3416	0.0210199	0.0924874	24	21	172472	0.177232	1	22.7907	17.9999	733769	0.02456	0.135245	23.3953	19.4742	591595	176312	0.298029	596123	627420	683426	866988	329127	504018	522497	309377	654392	383076	398584	730464	829757	706035	766102	633185	596286
2497	unkown3423	0.00267199	0.0224826	18	0	207556	0.0840532	1	24.2975	17.9999	1.13475e+06	0.00211142	0.024606	21.1488	18.408	1.02702e+06	174930	0.170327	1183908	1250875	1144467	1289182	828988	870702	1114639	838914	919709	905326	816090	1078234	1234386	1015730	1162721	1126177	1048753
2502	unkown3428	0.000987235	0.0119368	18	0	65600.2	0.04332	1	23.7736	17.9999	461420	0.000472992	0.0102909	20.8868	18.3505	416171	63290.7	0.152078	476667	495385	438117	504827	379586	383874	347680	352395	451110	387053	356621	377533	465832	442659	462114	475075	424783
2507	unkown3433	0.0144977	0.0712252	24	0	32803.7	0.18088	1	24.5682	6.63e-05	234495	0.0182088	0.109204	24.2841	3.28e-05	199931	41782.1	0.208983	205283	222947	251996	257755	199162	167115	191084	157793	218068	165506	119823	182629	213523	198486	214876	226818	199554
2508	unkown3434	0.0144977	0.0712252	18	0	87486.1	0.159388	1	24.8451	17.9999	463296	0.0163375	0.102634	21.4225	18.4714	429872	76861.9	0.178802	474141	542254	580783	492804	397960	375462	395207	341685	481729	347972	313465	418898	485460	391567	473945	502212	438472
2526	unkown3450	0.0210199	0.0924874	24	12	32828.5	0.187746	1	24.4321	12	220354	0.0257895	0.139696	24.2161	12.001	194045	40690.8	0.209698	197711	173767	114910	158691	221099	216166	239068	193670	195599	224963	206568	254288	190106	164841	153039	204861	194334
2530	unkown3454	0.00267199	0.0224826	24	21	58893.5	0.134245	1	24.8451	17.9999	476141	0.0032043	0.0314845	24.4225	19.5318	402323	70374.8	0.174921	410126	426466	382637	451613	337018	346867	385325	297866	341839	377231	331517	424181	584803	439617	428547	451601	401078
2535	unkown3459	0.00164724	0.0165458	18	0	101264	0.10966	1	24.7059	17.9999	494560	0.00173754	0.0219505	21.3529	18.455	456425	86527.3	0.189576	542945	522356	557281	613233	414094	388774	448246	311561	405010	383238	382725	514334	493653	497235	468280	519075	466378
2541	unkown3466	0.00267199	0.0224826	24	21	87798.8	0.0262653	1	23.9024	17.9999	513122	0.00074142	0.0129104	23.9512	19.497	441693	93431.9	0.211531	446730	521532	555876	457278	386126	318709	392516	377591	413356	397449	366529	384035	486015	542647	516964	506865	441889
2542	unkown3467	0.0299489	0.115346	24	0	123952	0.261998	1	23.7736	6.63e-05	795354	0.0458842	0.211511	23.8868	3.33e-05	704516	164695	0.233771	752291	705638	869742	853748	536592	574820	778897	657992	571331	624787	487332	670214	1021883	714949	766351	695563	705133
2543	unkown3468	0.0419656	0.142411	24	0	275631	0.215378	1	24.0327	6.63e-05	1.71043e+06	0.051576	0.225662	24.0163	3.31e-05	1.4887e+06	323029	0.216987	1603486	1556421	1885386	1796453	1297236	1245525	1709349	1119446	1431656	1163637	1076924	1382132	1964104	1534113	1409922	1640645	1.48853e+06
2549	unkown3473	0.000572095	0.00854353	18	0	162389	0.086859	1	24.7059	17.9999	711290	0.000542119	0.0111583	21.3529	18.455	648733	131135	0.20214	800518	782050	829083	796189	574863	542852	622344	484390	677807	529196	446646	689967	739368	633460	720492	751842	663817
2554	unkown3478	0.0210199	0.0924874	18	3	26779.9	0.413776	1	24.0327	8.09e-05	415058	0.0499648	0.221574	21.0163	1.7514	395788	59488.2	0.150303	425154	399353	440194	395533	470258	379866	337765	353200	384458	303445	364701	361548	450860	413635	468549	457852	400398
2569	unkown3493	0.00980952	0.0546185	18	3	8883.74	0.587257	1	28	5.99999	239108	0.0354669	0.175583	23	4.38095	245968	3249.39	0.0132106	245214	239829	212000	241777	236665	244617	200774	274376	234052	235605	197934	216140	285263	251303	310402	308794	245922
2570	unkown3494	0.0144977	0.0712252	18	9	35003.2	0.893832	1	20	6	230385	0.0692763	0.277681	19	7.6	203281	26423.3	0.129984	171045	158177	164868	150602	267162	238263	213781	202334	222314	202646	191930	161676	236677	201049	187233	199628	198087
2573	unkown3497	0.0419656	0.142411	18	6	53461.5	0.934923	1	20	6.00002	401890	0.166284	0.497638	19	6.01668	351391	53061.9	0.151006	398517	291088	303471	266419	486972	444832	312260	363498	314508	277431	289219	269210	323697	420541	366100	391606	344961
2578	unkown3501	0.00421867	0.0314483	18	3	19723.5	0.11704	1	24.9858	17.9999	412188	0.00425292	0.0386752	21.4929	20.2793	338067	57571.9	0.170297	379622	345082	390772	336060	363130	302973	261666	279181	362795	245490	275934	323639	374487	410930	433429	429909	344694
2581	unkown3506	0.00980952	0.0546185	18	3	9932.02	0.104598	1	24.1644	17.9999	203949	0.00808739	0.0616117	21.0822	20.15	176240	25802	0.146403	206874	192558	178748	199150	161337	147816	166114	161934	148578	151378	160463	183933	228363	195312	169000	223123	179668
2582	unkown3507	0.000987235	0.0119368	18	3	35362.4	0.263034	1	23.7736	4.83e-05	423434	0.00240358	0.0262916	20.8868	1.74059	392382	77543.5	0.197623	418910	499160	371257	404409	378848	378509	398081	348267	320938	331035	333405	362098	523109	393970	410080	508651	398795
2583	unkown3508	0.00980952	0.0546185	18	6	426052	0.983966	1	20	6.00001	6.80311e+06	0.0544441	0.233406	19	6.01667	6.42902e+06	417303	0.0649092	6170528	6286251	5660843	6093557	7499956	7073009	5905080	6734398	5396196	6036682	5861846	6010588	7236135	6672519	6778958	6638748	6.37846e+06
2584	unkown3509	0.0299489	0.115346	24	0	18176.9	0.296277	1	24.7059	6.63e-05	141642	0.0507966	0.223723	24.3529	3.27e-05	118466	24871.3	0.209945	153899	153247	127936	131485	115078	127867	97581	105403	79123	126777	65821	120594	141498	109729	112509	122489	118190
2586	unkown3510	8.77e-05	0.00272746	24	0	45349.1	0.0232102	1	24.0327	6.63e-05	303263	2.87e-05	0.001904	24.0163	3.31e-05	263213	54125.4	0.205633	311049	288106	315668	298229	219458	256141	246879	240372	203913	238671	223113	230216	307026	257551	297868	276693	263185
2588	unkown3512	0.0419656	0.142411	24	0	43409.6	0.154165	1	24.0327	6.63e-05	336052	0.0390808	0.187904	24.0163	3.31e-05	302234	49093.9	0.162437	353320	340805	335693	314393	270231	318875	239755	273291	327167	228962	272466	253778	320672	322464	308736	354717	302208
2597	unkown3524	0.000572095	0.00854353	24	0	27761.7	0.101778	1	24.2975	6.63e-05	264426	0.000626007	0.0117637	24.1488	3.3e-05	233332	38418.7	0.164653	288234	266054	241923	261493	223164	226689	213551	211798	247395	167438	210731	192071	249866	241534	231194	257230	233148
2599	unkown3526	0.0065055	0.0420944	18	6	25307.4	0.834623	1	20	6.00001	123812	0.03375	0.169502	19	6.01667	97785.9	27900.8	0.285325	105118	81510	72229	52644	160821	134884	100530	99014	69903	74275	81490	55198	91184	92089	117758	121831	94404.9
2600	unkown3527	0.0419656	0.142411	24	21	40568.8	0.322075	1	24.7059	17.9999	551275	0.0716876	0.284354	24.3529	19.5258	492410	59704.6	0.12125	471061	524046	515490	535784	423355	389106	517820	462359	480618	379674	475922	484052	647854	515636	520969	520645	491524
2601	unkown3529	0.000987235	0.0119368	18	9	92645.8	0.015622	1	23.9024	6	232168	0.000186299	0.00591697	20.9512	7.8674	161087	96323.1	0.597955	58883	70120	67809	94206	208615	284957	208894	226206	169791	188925	247947	210193	81663	89975	100326	64131	148290
2603	unkown3530	0.0419656	0.142411	24	0	147437	0.311741	1	23.9024	6.63e-05	656616	0.069814	0.278885	23.9512	3.32e-05	552613	179170	0.324224	636748	705686	465231	818802	436845	397391	619248	410585	389156	405562	414654	524466	903908	519652	579430	619040	552900
2604	unkown3531	0.000987235	0.0119368	24	0	268216	0.0673119	1	23.52	6.63e-05	1.35037e+06	0.000705663	0.0127302	23.76	3.35e-05	1.14173e+06	343478	0.300839	1373052	1406683	1204548	1417206	1047500	922289	1194649	900117	769815	886766	831399	1060307	1614000	1104543	1345993	1233129	1.1445e+06
2610	unkown3537	0.00980952	0.0546185	18	6	26801.1	0.899549	1	20	6	150024	0.0505647	0.223446	19	6.01667	126734	26774.8	0.211268	116714	105623	90710	99894	152368	173398	153082	121249	132392	98906	100884	92314	126366	131575	138277	142080	123490
2616	unkown3542	0.0419656	0.142411	18	6	39098.9	0.871195	1	20	6	158004	0.15753	0.480367	19	6.01667	126527	40023.4	0.316322	96672	85577	87964	63566	180851	160484	150214	140466	113952	83651	127784	122302	129878	163197	115514	124767	121677
2617	unkown3543	0.00980952	0.0546185	18	6	54369.8	0.886555	1	20	5.99999	247605	0.0499608	0.221574	19	6.01666	206158	48035.4	0.233003	219410	160796	152278	121521	256438	260566	243742	229675	176581	158374	202590	153291	182210	238892	229813	219213	200337
2629	unkown3563	0.0419656	0.142411	24	15	528940	0.108373	1	20	12	5.11993e+06	0.0290753	0.153548	22	13.475	4.36958e+06	927673	0.212302	4142540	3913653	4009984	3789779	4132885	3566015	3779490	4255178	4964947	5203387	5860130	4451257	3746988	4954394	4199149	4544359	4.34463e+06
2638	unkown3573	0.0210199	0.0924874	24	12	265665	0.176733	1	20.1831	12	2.22829e+06	0.0245013	0.135087	22.0915	12.0902	1.91449e+06	376466	0.19664	1839773	1525026	1912409	1453221	2046690	1787011	1819694	2103846	2085004	2267494	2270780	2289888	1310317	1704876	1834485	2039497	1.89313e+06
2643	unkown358	0.00164724	0.0165458	24	12	243609	0.0110505	1	23.9024	12	502912	0.000216867	0.00665355	23.9512	12	310417	298236	0.960759	166531	80127	125451	149685	490932	409954	408285	552201	520427	570798	455044	465378	72065	188412	134255	169519	309942
2645	unkown3581	0.0065055	0.0420944	24	12	372397	0.126197	1	24.2975	12	1.97166e+06	0.00665403	0.053654	24.1488	12.0005	1.65423e+06	450583	0.272383	1408191	1225585	1238125	1296091	1628658	2049665	1551415	2240827	1769605	2213337	2160811	1742901	1087251	1626232	1495765	1768395	1.65643e+06
2646	unkown3582	0.0144977	0.0712252	24	12	377524	0.199173	1	24.1644	12	2.06549e+06	0.0197721	0.115508	24.0822	12.0001	1.75579e+06	456814	0.260176	1550992	1412945	1260160	1437829	1904820	2181370	1560023	2295681	1838027	2417717	2258811	1747388	1068210	1881733	1577503	1719058	1.75702e+06
2656	unkown3594	0.0419656	0.142411	18	15	217804	0.96883	1	28	12	498051	0.170866	0.50441	23	14.5119	448467	291162	0.649237	662995	781100	443900	814783	257711	258612	312720	284885	449637	478485	454713	609369	474970	352758	160489	364242	447586
2658	unkown3597	0.00267199	0.0224826	18	0	181660	0.385761	1	27.4766	17.9999	297405	0.00811972	0.0617537	22.7383	18.8171	325844	171851	0.527403	594231	567146	373015	794092	169631	174403	203834	141707	246099	270286	334766	301744	443386	262808	138324	345102	335036
2659	unkown3599	0.0299489	0.115346	18	0	345062	0.73726	1	28	12	873763	0.106273	0.370111	23	4.92857	863362	573339	0.664077	1403250	1325358	907041	1779815	462205	480029	617547	516818	895935	852403	823376	923339	1141896	677478	441284	755159	875183
2662	unkown3601	0.0419656	0.142411	18	0	611917	0.750733	1	28	12	1534133	0.140437	0.443242	23	4.92857	1.50695e+06	1.01831e+06	0.675739	2341520	2575173	1525920	3048639	767039	850093	1042230	913371	1613332	1482253	1470025	1570922	1951191	1187795	725735	1381973	1.52795e+06
2664	unkown3603	0.00421867	0.0314483	18	0	701023	0.630823	1	27.6489	12	2803116	0.0184396	0.110003	22.8245	4.95305	2.78148e+06	951743	0.342171	3576993	3634698	3073574	3963195	2209519	2012872	2351657	2202724	3203562	2677674	2485196	2846032	2996147	2739461	2119976	2778339	2.80448e+06
2665	unkown3604	0.0065055	0.0420944	24	0	303033	0.180815	1	25.2722	6.63e-05	1.73576e+06	0.00911083	0.0671403	24.6361	3.23e-05	1.3472e+06	398041	0.295458	1757650	1711469	1299719	2174232	1243225	1114466	1227656	1130276	1095731	1061392	1121023	932321	1788378	1494972	915550	1363675	1.33948e+06
2666	unkown3605	0.00980952	0.0546185	18	15	396079	0.959719	1	20	12	2.01342e+06	0.0533373	0.231251	19	13.6167	1.7483e+06	478424	0.273651	1832334	2224555	1772000	2188962	1575410	1218454	1473752	1364818	2241437	2050129	1798194	1963919	1664707	1523595	1154925	1851416	1.74366e+06
2667	unkown3606	0.00980952	0.0546185	24	9	32712.9	0.170531	1	23.6461	6	115044	0.0123676	0.0836251	23.8231	7.48927	83295	37299.9	0.447805	50764	57620	44563	92948	115808	89991	111405	142971	94433	86538	115797	103157	94416	80168	7749	39881	83013.1
2668	unkown3607	8.77e-05	0.00272746	18	0	84110.4	0.121049	1	26.1721	17.9999	369326	0.000132189	0.00488664	22.0861	18.6379	360435	91542.4	0.253978	442143	540319	406609	566712	301388	284045	289459	301730	344509	285859	340822	306412	428509	357720	313113	377964	367957
2669	unkown3609	0.00421867	0.0314483	18	0	68779.9	0.462577	1	27.8233	12	103909	0.014127	0.0924711	22.9117	4.94082	114811	101874	0.887326	204972	211569	134494	282705	37391	40785	91398	56219	107536	106269	96994	104837	145626	73563	43073	136058	117093
2671	unkown3610	0.0065055	0.0420944	18	12	88149	0.0222483	1	24.0327	12	596277	0.00142429	0.01929	21.0163	12.2524	491364	165698	0.337221	389496	318876	361180	449605	576016	599309	630794	551295	589120	583754	591970	620263	431412	342923	220054	399624	478481
2678	unkown3620	0.00421867	0.0314483	18	0	1.36553e+06	0.572279	1	27.8233	12	4927356	0.0169634	0.104931	22.9117	4.94082	4.95875e+06	1.82696e+06	0.368431	6673762	7362311	5327184	6735200	3712303	3541295	4278674	3921408	5757369	4453007	4466276	5032772	5375598	4727661	3852411	4777599	4.99968e+06
2683	unkown3628	0.000987235	0.0119368	18	0	102875	0.370771	1	25.1282	17.9999	313581	0.00326241	0.0319858	21.5641	18.5055	286001	108820	0.380489	497618	397409	296783	506949	78744	210801	227821	225268	251620	262775	251098	298514	438914	256058	233540	325814	297483
2701	unkown3654	0.0144977	0.0712252	18	15	519760	0.295409	1	20	12	2.42211e+06	0.0276373	0.147381	19	13.6167	2.26259e+06	508168	0.224596	2563874	2670031	2418683	2893270	1522225	1626305	1833463	1875338	2702795	2196366	2240854	2548431	2383343	2130292	2115356	2402075	2.25767e+06
2728	unkown3697	1.91e-05	0.00111825	18	6	196717	0.390167	1	20	5.99998	630698	9.54e-05	0.00421833	19	6.01666	459618	176625	0.384287	302408	347349	313194	432233	736886	690069	547855	547980	243118	269717	269146	239571	556640	451138	599663	464475	438215
2731	unkown370	0.000572095	0.00854353	24	12	191977	0.0150595	1	23.7736	12	430806	0.000109089	0.00455546	23.8868	12.0003	266430	236038	0.885928	108983	103932	129550	199751	420753	308974	341260	386217	489601	455133	323999	454492	110039	152265	138346	125630	265558
2733	unkown3701	0.0299489	0.115346	18	0	35807.2	0.770873	1	26.0177	17.9999	123446	0.110089	0.381046	22.0088	18.6177	120396	38224.9	0.317492	245291	206072	84348	154435	102173	58649	94698	83854	127414	140496	97229	90253	103372	103168	135031	152214	123669
2734	unkown3702	0.00980952	0.0546185	18	0	58328.5	0.27094	1	27.8233	17.9999	52252.2	0.0184192	0.110003	22.9117	18.867	75449.9	80711.9	1.06974	206766	213213	71236	339335	9706	13714	37294	13070	55330	24428	57259	16205	113873	53027	9923	32186	79160.3
2739	unkown3709	0.0065055	0.0420944	24	12	375859	0.266857	1	20	12	1956532	0.0127705	0.0859629	22	12.1	1.18711e+06	826953	0.696608	652006	773922	538394	754165	957964	1181450	910281	1194570	1180929	1301825	1919344	3424030	1385699	560541	837332	640806	1.13833e+06
2750	unkown372	7.77e-06	0.000673899	24	12	229411	0.00831753	1	24.2975	12	478572	1.13e-06	0.000213193	24.1488	12.0004	297324	271907	0.914512	70381	79614	116565	75091	464534	447437	390155	467241	483962	476754	434212	519361	175250	209617	189687	178578	298652
2753	unkown3726	0.00980952	0.0546185	18	0	134434	0.373625	1	26.8085	17.9999	417987	0.0242222	0.134204	22.4043	18.7235	423795	154043	0.363485	665485	660332	453079	813466	252588	316858	326158	308385	372273	313982	426738	367280	664306	351995	257048	398600	434286
2754	unkown3728	0.0065055	0.0420944	18	0	158760	0.556182	1	28	12	383890	0.0239591	0.133567	23	4.92857	402805	242533	0.602111	553929	738811	452054	756628	207457	309499	197389	341276	366722	337374	434461	397001	492146	317074	215869	407194	407805
2762	unkown3736	0.000320124	0.0059414	18	0	89525.4	0.202766	1	24.5682	17.9999	182198	0.00069081	0.0126033	21.2841	18.439	155771	74765.4	0.479969	193974	284499	247204	263376	71300	67284	150987	57317	212216	93706	105019	157973	218747	153313	181536	175198	164603
2763	unkown3737	0.0210199	0.0924874	18	12	78882.4	0.461199	1	22.4427	12	492862	0.0546394	0.233974	20.2214	12.1466	354241	168593	0.475928	238829	275930	195206	196138	344164	401404	310985	471368	278143	330174	575419	787710	488279	183462	170119	160500	337989
2766	unkown374	0.00267199	0.0224826	18	15	40482.9	0.493725	1	20	12	196934	0.0100667	0.072294	19	13.6167	169005	49174.1	0.290963	241420	174373	144622	187824	120708	137741	101057	144780	185998	192331	204713	204693	179999	167483	135974	172738	168528
2767	unkown3740	0.000572095	0.00854353	18	0	8.43202e+06	0.288906	1	26.9725	17.9999	1.87906e+07	0.00160453	0.0209751	22.4862	18.7462	1.93487e+07	8.01491e+06	0.414236	30814560	33226513	22022649	37767383	10724567	11882740	13044976	13790494	18809919	15719544	18606152	16278186	26635381	17529436	12056712	18940772	19865624
2769	unkown3744	0.0210199	0.0924874	24	0	51992.9	0.245065	1	25.8651	6.63e-05	178108	0.0322906	0.164741	24.9326	3.2e-05	100496	71019	0.706684	164340	223952	66469	257675	75618	88272	91508	14873	43274	58215	53354	40216	122467	122629	22933	130972	98547.9
2770	unkown3745	0.00164724	0.0165458	24	12	22016.7	0.135532	1	23.9024	12	50244	0.00210019	0.0245385	23.9512	12	29453.8	30199.4	1.02532	6079	25357	5011	3341	56520	57957	28443	29821	51678	31633	29086	88579	10802	18765	10824	16594	29405.6
2786	unkown3770	0.0210199	0.0924874	18	6	174197	0.667891	1	20	5.99999	736223	0.0739281	0.289172	19	6.01666	602019	137215	0.227924	620844	586028	437661	449638	815057	716000	657667	756167	452716	456964	545222	406484	798259	465599	467573	734383	585391
2791	unkown3777	0.00980952	0.0546185	18	12	44852.5	0.613297	1	21.0501	12	133550	0.0367786	0.180491	19.5251	12.0737	78653.2	56828.8	0.722523	31591	36593	21014	28200	57120	103534	44560	73451	42637	115058	144822	231682	187206	19760	11104	9964	72393.5
2796	unkown3787	0.0210199	0.0924874	18	12	33930.5	0.119193	1	20	12	110166	0.0175111	0.106432	19	12.0333	71783.7	42831.7	0.596678	64804	52316	45190	22424	68169	53083	107807	43289	95048	115496	138186	91932	27392	30828	45410	66208	66723.9
2797	unkown3788	0.0065055	0.0420944	18	0	119029	0.499964	1	27.4766	12	190069	0.021884	0.124804	22.7383	4.96531	201474	157926	0.783851	319030	381655	207500	455826	93488	101906	132252	103475	144288	208105	200012	207871	249230	171112	123664	189606	205564
2798	unkown3790	0.0210199	0.0924874	24	12	38387.1	0.236025	1	20.5594	12	214997	0.031286	0.160889	22.2797	12.072	136576	75809.8	0.555074	82355	121462	47253	66814	99155	119143	89155	150840	128280	187129	207696	336883	202084	112321	81604	90036	132638
2800	unkown3792	0.00267199	0.0224826	24	0	105792	0.0491609	1	23.7736	6.63e-05	753299	0.00130538	0.0189301	23.8868	3.33e-05	669460	145532	0.217387	700603	750544	726627	835425	582543	608176	622842	603800	558904	530353	533857	655078	866271	681655	731043	732375	670006
2802	unkown3794	0.0210199	0.0924874	24	0	29731.4	0.220012	1	26.1721	6.63e-05	135645	0.0294883	0.154462	25.0861	3.18e-05	97948.9	32395.7	0.330741	119665	153681	126341	142896	43775	74783	87974	108016	99198	62451	65692	78184	123907	106384	56268	101716	96933.2
2803	unkown3795	0.000987235	0.0119368	24	0	36669.1	0.0499623	1	24.2975	6.63e-05	165713	0.00053848	0.0111583	24.1488	3.3e-05	128682	46716.5	0.363039	142402	179399	152811	188240	105136	75406	116063	106431	106973	90598	96573	103545	183409	141884	117861	148596	128458
2804	unkown3797	0.000171384	0.00408964	24	0	23958.2	0.0404411	1	24.0327	6.63e-05	182298	8.93e-05	0.00402596	24.0163	3.31e-05	159467	30529.3	0.191446	176860	179390	171707	201234	142838	138347	145081	159630	141018	123679	135219	149980	190936	171660	160684	162948	159451
2805	unkown3798	0.0419656	0.142411	18	3	11310.5	0.722216	1	20	6.63e-05	183845	0.136276	0.433125	19	1.58336	180363	17540.2	0.0972495	184218	161895	193238	196030	175263	186717	200220	161999	169525	150168	177509	167611	213829	201464	209045	184677	183338
2808	unkown3800	0.000987235	0.0119368	24	0	29379.8	0.136954	1	23.7736	6.63e-05	153138	0.00133971	0.0189712	23.8868	3.33e-05	128040	40829	0.318876	152074	137430	148633	174417	106885	121705	117942	96844	109394	98001	92782	96499	206946	133846	113275	144422	128193
2810	unkown3803	0.00421867	0.0314483	24	0	26455.9	0.105427	1	23.9024	6.63e-05	196787	0.00387741	0.0365839	23.9512	3.32e-05	174002	32815.9	0.188595	176913	208607	185660	215969	160109	163346	175205	141447	151311	139119	137055	174779	212122	187034	166372	189824	174054
2813	unkown3806	0.00267199	0.0224826	18	3	11269.9	0.0658773	1	24.0327	6.63e-05	132939	0.00169773	0.0215683	21.0163	1.75139	116121	26058.4	0.224407	135661	136843	124690	134562	100067	92665	119219	95964	109001	84235	94379	109575	156030	148785	110933	137638	118140
2814	unkown3807	0.00164724	0.0165458	24	0	32048.9	0.0146987	1	24.0327	6.63e-05	136407	0.000281557	0.00764952	24.0163	3.31e-05	109239	38996.8	0.356988	128817	147598	124975	144240	98650	74644	96058	85035	88745	81930	89699	74585	134188	128962	118398	130959	109218
2815	unkown3808	0.00980952	0.0546185	18	3	25538.2	0.237643	1	20	6.63e-05	137191	0.0164612	0.103111	19	1.58336	121761	30020.5	0.246553	129338	118455	136190	164782	113671	148004	130087	123588	100258	86519	93786	91452	186416	132123	125341	149622	126852
2818	unkown3811	0.000572095	0.00854353	18	0	42044.2	0.333224	1	27.8233	12	46581.8	0.00182346	0.0225175	22.9117	4.94082	53269	57967.9	1.08821	101221	143063	68226	115302	16083	20752	24629	19444	54168	53255	35468	43436	56110	48249	19288	54389	54567.7
2819	unkown3812	0.000987235	0.0119368	24	0	26557.9	0.0527335	1	23.7736	6.63e-05	175214	0.000565537	0.0112857	23.8868	3.33e-05	151494	32939.5	0.217431	172587	183107	170466	174695	127390	135186	161026	136816	121476	136658	114239	132750	195788	156546	153023	154132	151618
2820	unkown3813	0.00164724	0.0165458	24	0	26680.7	0.0417598	1	23.9024	6.63e-05	163713	0.000728089	0.0128269	23.9512	3.32e-05	142940	33919	0.237295	171635	165644	153377	164198	116344	136846	138598	117178	109858	117980	126796	124689	190148	144236	158154	152235	142995
2821	unkown3815	0.00267199	0.0224826	24	0	25584.9	0.0973679	1	22.4427	4.68e-05	194526	0.00240763	0.0262916	23.2214	2.42e-05	175293	29321.2	0.167269	172593	198522	199369	207619	157704	163006	196127	158618	148516	153155	158945	141049	209303	188099	171228	193771	176102
2822	unkown3816	0.0210199	0.0924874	24	0	16833.4	0.401687	1	24.0327	6.63e-05	145200	0.0487554	0.218436	24.0163	3.31e-05	133136	23774.1	0.178569	140385	145231	133539	161645	107196	120539	127951	127486	118214	102626	116661	134889	193056	131801	125656	143102	133124
2826	unkown3821	0.000987235	0.0119368	24	0	18340.4	0.0609846	1	25.2722	6.63e-05	112483	0.000645273	0.011927	24.6361	3.23e-05	91836.1	20812.1	0.226622	102320	115738	106085	125788	97771	72682	87562	79703	77073	76347	75507	73565	101451	105620	79043	86668	91432.7
2827	unkown3822	0.000320124	0.0059414	24	0	23479.8	0.0466095	1	22.9091	6.63e-05	151650	0.000180732	0.0058668	23.4545	3.39e-05	132459	31441.5	0.237368	154359	142339	146830	163074	124800	115762	133186	120709	116918	107470	103830	101099	177287	131211	144111	145857	133053
2828	unkown3823	0.000987235	0.0119368	18	3	11217.5	0.0578355	1	24.5682	6.63e-05	130277	0.00061498	0.0117028	21.2841	1.77371	117729	27834.3	0.236427	121814	122876	139648	136770	108570	99985	107594	97546	95837	86677	102310	117576	170281	140748	130108	135240	119599
2829	unkown3824	0.0144977	0.0712252	18	3	8465.48	0.442082	1	24.2975	7.3e-05	60837.2	0.0387757	0.187437	21.1488	1.76243	55741.5	16163.2	0.289967	63721	68195	61488	49945	56342	53539	61577	38624	44083	38350	50795	44657	92263	66914	52502	67574	56910.6
2830	unkown3825	0.00267199	0.0224826	24	0	22364.7	0.0971326	1	24.0327	6.63e-05	128303	0.00240244	0.0262916	24.0163	3.31e-05	107047	26121.4	0.244019	140182	126661	118177	128192	99502	94230	116592	87037	89545	72838	90033	91728	138670	123889	90292	104955	107033
2832	unkown3827	0.0419656	0.142411	18	6	19043.6	0.999986	1	20	6	205879	0.175033	0.508227	19	6.01667	197286	10794.4	0.0547146	182794	188158	171265	189457	212888	216706	200119	193803	154804	127828	174921	238935	249981	193744	247588	192655	195978
2834	unkown3829	0.0144977	0.0712252	24	0	20301.7	0.23993	1	23.7736	6.63e-05	123660	0.0231705	0.130946	23.8868	3.33e-05	109331	26679.1	0.24402	103331	132257	124870	134182	93269	114567	103960	79643	101795	89029	78006	94746	162954	110402	118154	109738	109431
2835	unkown3830	0.00421867	0.0314483	18	3	9717.95	0.275467	1	20	4.21e-05	55571.2	0.00901505	0.066699	19	1.58335	47597.3	15050.8	0.316211	45993	44607	68618	63067	40769	50661	56887	35935	33126	34825	42944	31773	66167	77017	60801	49208	50149.9
2837	unkown3832	0.000320124	0.0059414	18	3	13859.8	0.0583816	1	20	4.99e-05	84111.9	0.000222171	0.00672477	19	1.58336	70674.3	19385.1	0.274287	79771	90530	73296	92851	67847	73233	77462	63791	61438	50247	59962	43714	92917	75491	91917	88924	73961.9
2838	unkown3833	0.00267199	0.0224826	18	0	49411.9	0.200845	1	20	17.9999	183902	0.00457776	0.0404025	19	18.05	160621	43418.6	0.270317	196995	210934	198471	263034	84164	102692	146676	90384	212216	167287	135363	177051	213319	153313	181536	187441	170055
2840	unkown3835	2.89e-06	0.000406746	24	0	19480.8	0.0147729	1	23.9024	6.63e-05	108783	7.66e-07	0.00018312	23.9512	3.32e-05	88555.3	24872.3	0.280868	106228	109811	109258	109837	73761	85224	93893	76563	72898	71782	57513	69209	99255	92720	97417	92154	88595.2
2842	unkown3837	0.0065055	0.0420944	24	0	25091.3	0.0886235	1	24.5682	6.63e-05	101429	0.00487664	0.0423382	24.2841	3.28e-05	75395.8	30254.8	0.401279	100434	94003	96002	115276	61796	75770	66278	45793	64704	62014	52235	34509	72627	87775	59500	113253	75123.1
2843	unkown3838	0.0210199	0.0924874	24	21	19485.4	0.20683	1	24.2975	17.9999	126049	0.0279901	0.149038	24.1488	19.5099	108646	20564	0.189275	123247	126320	102653	122011	94049	92859	100863	86630	90484	67935	106887	118125	150477	112577	114690	126454	108516
2844	unkown3839	0.00164724	0.0165458	18	3	7018.21	0.199147	1	24.0327	6.63e-05	76434.9	0.00295973	0.0297955	21.0163	1.75139	68119.9	19453.1	0.285571	68067	63589	83854	90230	62496	54858	68310	65766	58324	58642	56068	45121	103914	89773	71452	73578	69627.6
2846	unkown3840	0.000320124	0.0059414	24	0	16403.1	0.0421205	1	22.9091	6.63e-05	78228.1	0.000164691	0.00546145	23.4545	3.39e-05	64958.6	22165.4	0.341223	79142	85337	82268	66166	62861	56653	57983	57629	65797	34981	45426	42770	76685	75022	78781	78532	65377.1
2847	unkown3841	0.00164724	0.0165458	24	0	17241.2	0.0309079	1	23.9024	6.63e-05	79041.9	0.000554205	0.0111583	23.9512	3.32e-05	64515.8	21047.2	0.326234	77223	79603	72003	87339	55341	63259	50765	52201	57988	54559	45004	40807	71127	63325	82511	79738	64549.6
2848	unkown3843	0.0065055	0.0420944	24	21	23569.8	0.129345	1	20	17.9999	142381	0.00679925	0.0544665	22	19.525	125421	24328.3	0.193973	131222	140530	135141	183466	86570	84841	103460	102054	124581	117906	118567	144811	154000	117599	151752	146175	127667
2851	unkown3846	0.000171384	0.00408964	24	0	20485.2	0.0227154	1	24.1644	6.63e-05	92833.3	5.24e-05	0.00295327	24.0822	3.3e-05	74426.1	24841.3	0.333772	86642	92681	94604	97407	64750	57865	69141	60691	68198	57519	57923	44425	86766	87989	70830	92327	74359.9
2852	unkown3847	4.22e-05	0.00200244	24	0	16160.2	0.0333549	1	23.6461	6.63e-05	92951.9	2.04e-05	0.00154039	23.8231	3.34e-05	74585.6	22774	0.30534	80410	86990	107411	96997	66966	74166	69449	68080	61212	44373	56511	58424	89490	72274	74308	88458	74719.9
2854	unkown3849	0.00980952	0.0546185	24	0	16236.6	0.136536	1	23.7736	6.63e-05	74696.6	0.0101999	0.072956	23.8868	3.33e-05	59482.2	21979.7	0.369518	77907	66057	53703	101120	53909	50864	54110	45478	58976	42495	34495	36836	72599	72447	56857	75181	59564.6
2859	unkown3855	0.0210199	0.0924874	24	0	22049.4	0.41952	1	24.4321	6.63e-05	147839	0.0505368	0.223446	24.2161	3.29e-05	126147	27094.2	0.214782	137898	176968	128184	148305	102331	104559	128047	117294	146646	86190	96830	100060	169521	138135	106704	127690	125960
2863	unkown3860	0.000171384	0.00408964	18	9	15294.4	0.0165879	1	24.0327	6	31742.8	3.91e-05	0.00239315	21.0163	7.87756	20916.9	14673.8	0.701531	7832	7965	5011	4607	33054	37148	26036	30733	21894	31633	27019	29238	4984	10631	10824	15466	19004.7
2864	unkown3861	0.0144977	0.0712252	18	6	37583.1	0.43481	1	20	6.00002	109750	0.0382424	0.185758	19	6.01667	72638.1	42334.1	0.582808	51233	6325	44245	51311	100134	100648	132901	105317	40174	53022	49327	64854	99412	74080	57580	49566	67508.1
2872	unkown3874	0.00164724	0.0165458	18	0	36074.5	0.298977	1	27.3065	17.9999	52244.2	0.00424329	0.0386752	22.6533	18.7929	58189.4	40985.7	0.70435	110557	132367	68520	169123	20597	28198	26426	24251	50657	52846	42879	33137	93340	45725	16799	53113	60533.4
2873	unkown3876	0.00164724	0.0165458	18	0	59387.1	0.236547	1	20	17.9999	205728	0.0034485	0.0335189	19	18.05	186719	49309.7	0.264085	263687	273261	219624	278619	96741	138141	152905	126639	193007	191703	195492	206195	245760	189868	150991	236293	197433
2877	unkown3880	0.000171384	0.00408964	18	0	79548.8	0.281184	1	25.8651	17.9999	182138	0.000527221	0.0110594	21.9326	18.5979	172194	76025.2	0.441509	261737	294836	194344	343374	84781	104135	118981	101993	149376	156362	182199	142703	251770	170481	116440	189863	178961
2882	unkown3885	0.0144977	0.0712252	18	0	36849.5	0.712363	1	28	12	147369	0.0575553	0.24282	23	4.92857	155374	64310.7	0.413909	168125	211728	178300	304227	110737	118277	136564	111161	139575	165590	149316	134995	198147	153902	111845	114709	156700
2883	unkown3886	0.00164724	0.0165458	18	6	19719.4	0.942579	1	20	6.00001	72021	0.0115949	0.0797149	19	6.01667	59986.9	13126.3	0.21882	54030	29748	46168	63962	78611	65690	67579	76204	43692	35691	31400	40341	101807	67063	65975	66379	58396.2
2885	unkown3888	0.00164724	0.0165458	18	0	128135	0.206408	1	24.1644	18	614774	0.00305546	0.0304301	21.0822	18.3931	564657	120703	0.213764	784779	736302	570746	744696	428935	456353	499592	428822	536752	574809	571093	488275	685196	610078	481443	682379	580016
2890	unkown3895	0.0210199	0.0924874	24	0	47381.1	0.18698	1	25.2722	6.63e-05	203204	0.0257003	0.139649	24.6361	3.23e-05	144428	59643.1	0.41296	219131	249845	133425	210418	128114	100722	136740	103154	114885	102551	118529	69282	217896	157376	86407	143881	143272
2908	unkown3918	0.0210199	0.0924874	18	0	26116.6	0.623378	1	24.5682	17.9999	135584	0.0699048	0.279001	21.2841	18.439	126980	24948.9	0.196479	172072	170163	110030	178546	88959	104802	126492	95487	142046	114685	123275	109944	143349	143660	93424	161905	129927
2913	unkown3924	0.000572095	0.00854353	18	0	71033.8	0.422014	1	20	17.9999	173450	0.0022523	0.0253167	19	18.05	155314	58916.5	0.379339	261737	290349	157652	278209	67631	102258	116033	90748	149376	149430	182199	150414	251770	170481	116077	155474	168115
2922	unkown3935	0.00980952	0.0546185	18	6	59039.5	0.960595	1	20	6.00001	281394	0.0533775	0.231251	19	6.01667	249971	34013	0.136067	233412	156727	223993	263337	290623	262105	287941	284905	179229	190137	177992	183956	400721	290791	259346	248378	245850
2923	unkown3936	0.00421867	0.0314483	18	6	70300.9	0.58439	1	20	6.00001	282270	0.0172708	0.105847	19	6.01667	197410	89239.8	0.452053	143570	120289	116559	182486	383469	240317	294822	210472	102698	126587	122920	132064	314979	202056	129413	162830	186596
2925	unkown3938	0.00980952	0.0546185	18	0	30559.2	0.327269	1	26.8085	17.9999	79083.5	0.0216422	0.123866	22.4043	18.7235	79978.6	26929.5	0.336709	104233	109974	114662	145252	56046	71987	59847	39428	73255	79513	59690	78780	105644	94059	58320	58311	81812.6
2929	unkown3945	0.000572095	0.00854353	18	0	51937.5	0.413842	1	26.8085	17.9999	105713	0.00221332	0.0252671	22.4043	18.7235	109118	47695.7	0.437104	179818	172771	126739	231396	53850	65342	78136	58802	87498	111959	109256	99433	143942	110947	53951	114012	112366
2930	unkown3947	0.00164724	0.0165458	18	0	56162.8	0.350404	1	26.1721	17.9999	149626	0.00488157	0.0423382	22.0861	18.6379	145984	53025.3	0.363226	206723	267972	156615	241947	63035	125077	103180	96107	130418	122979	164263	128648	175843	161970	105518	155173	150342
2931	unkown3948	0.0065055	0.0420944	18	6	59006.3	0.657544	1	20	6	195180	0.0276094	0.147381	19	6.01667	150366	39398.2	0.262016	152750	196353	104319	105308	170032	210385	276052	124253	36647	73389	80126	54385	310211	151076	121613	162567	145592
2934	unkown3953	0.0419656	0.142411	18	6	22898.9	0.962297	1	20	6	248884	0.169987	0.503347	19	6.01667	235623	13124	0.0556992	225368	231226	219013	229215	239220	261295	231109	263914	203320	194388	232923	178147	323150	242179	215172	254876	234032
2937	unkown3958	0.000987235	0.0119368	18	6	107499	0.243256	1	20	6.00002	337874	0.00224162	0.0253167	19	6.01667	276170	51197.6	0.185384	293927	316342	255644	199496	339285	369180	341910	301123	111157	114104	134643	108617	476149	340896	326594	290382	269966
2941	unkown3963	0.0299489	0.115346	18	3	52749.8	0.224769	1	20	6	149759	0.040396	0.191977	19	4.43333	129214	65952.1	0.510409	129686	164013	122410	103956	142224	169541	166221	121051	54688	46850	68792	50575	214630	162382	184555	151806	128336
2942	unkown3964	8.77e-05	0.00272746	18	6	74101.3	0.938012	1	20	5.99999	327800	0.000855914	0.0143831	19	6.01666	260708	71771.9	0.275296	188546	201043	180278	248750	465779	286038	292369	267012	169603	141653	144232	171598	457016	296227	263288	258740	252011
2943	unkown397	0.0299489	0.115346	18	0	43239.4	0.283691	1	20	17.9999	183391	0.0490075	0.219052	19	18.05	150492	45674.8	0.303504	278530	186924	156276	195685	100318	119325	90278	122531	158041	177785	163838	83559	195210	162697	155659	219997	160416
2945	unkown3979	8.77e-05	0.00272746	18	3	122870	0.110387	1	24.1644	4.12e-05	302672	0.000121438	0.00480898	21.0822	1.75687	222404	258698	1.16319	382251	408421	218570	201446	186508	236996	189527	92294	47310	44492	45118	22855	642048	401774	361062	387864	241784
2947	unkown3986	8.77e-05	0.00272746	18	6	6.36567e+06	0.449017	1	20	6	1.57632e+07	0.000438724	0.00979528	19	6.01667	1.0694e+07	5.17393e+06	0.483817	9377811	10986050	5818305	4194040	14998481	15855362	19585895	12612884	2923665	5768205	6893444	2363725	15603211	11418925	10507382	12164700	1.0067e+07
2949	unkown3991	0.0144977	0.0712252	18	6	1.55118e+06	0.893106	1	20	6	5.94863e+06	0.0692306	0.277681	19	6.01667	4.30549e+06	1.57128e+06	0.364948	4371498	5056008	2403435	2033989	2836514	8985640	10391120	1581245	401035	548718	2068660	1027847	8333391	5098213	5174796	5529229	4.11508e+06
2950	unkown3993	0.0144977	0.0712252	18	0	26762.9	0.170891	1	20	17.9999	86417.1	0.0173439	0.105847	19	18.05	64108.4	25499.6	0.397757	96667	88375	80634	95275	48765	21790	68246	17761	89172	76295	56961	28772	88381	99164	87099	71025	69648.9
2951	unkown3997	2.89e-06	0.000406746	18	3	250991	0.0639675	1	24.1644	4.11e-05	720936	3.05e-06	0.000443289	21.0822	1.75687	549743	559113	1.01705	839275	870191	676694	497587	494409	499090	438758	364756	144247	153448	184651	142519	1314048	862019	1027686	956651	591627
2955	unkown4003	0.00980952	0.0546185	18	0	311604	0.150911	1	25.7143	17.9999	1.24059e+06	0.0111257	0.0771949	21.8571	18.5785	1.11907e+06	558448	0.49903	1901095	2201889	1105500	2258262	663350	811022	796314	666302	771187	869819	936874	786495	1743812	1216433	662533	1339591	1.17065e+06
2956	unkown4006	0.000171384	0.00408964	18	3	134464	0.022338	1	24.1644	6.63e-05	1.09036e+06	5.16e-05	0.00294464	21.0822	1.75688	912349	305340	0.334675	974571	1287864	1101466	997534	681208	835325	815876	713850	681172	658456	773184	742192	1287973	1114569	1147099	1151218	935222
2958	unkown401	0.00980952	0.0546185	18	15	51884.3	0.993766	1	28	12	99915.5	0.0548897	0.234647	23	14.5119	88506.2	76420.7	0.86345	224473	207287	80446	78497	32728	49657	58619	10597	64862	94769	161676	78355	73191	60174	71287	65779	88274.8
2959	unkown4011	0.000171384	0.00408964	18	3	141739	0.335471	1	25.7143	6.63e-05	708996	0.00061886	0.0117271	21.8571	1.82146	690517	330104	0.478053	815379	635808	628205	756594	573890	843363	702973	565801	425879	479407	545651	437236	1169587	917813	830386	969665	706102
2960	unkown4012	0.000987235	0.0119368	18	3	1.15382e+06	0.139976	1	20	5.99998	4053602	0.00136626	0.0189712	19	4.43332	3.8269e+06	1.20043e+06	0.313682	4414365	4759263	3641140	3275300	4073214	4097240	4075719	3968235	2018256	2164398	2663901	2280696	5681012	4673664	4773854	4414519	3.81092e+06
2965	unkown4028	0.00267199	0.0224826	24	21	31076.3	0.0951455	1	23.3952	17.9999	168027	0.00235855	0.0260074	23.6976	19.484	138732	34412.2	0.248048	138976	169934	155132	158207	148778	82251	79352	111206	129624	105882	148246	127243	181725	153960	180999	155423	139184
2969	unkown4031	0.0144977	0.0712252	24	18	26825.9	0.622467	1	26.6465	17.9999	291409	0.0515095	0.225662	25.3233	18.0493	210148	65376.8	0.311099	167921	194689	160966	237084	149066	159284	146743	155110	187612	177468	192439	228954	510600	189850	282913	182275	207686
2970	unkown4046	0.0299489	0.115346	18	0	58273.7	0.872038	1	28	12	138894	0.121316	0.406793	23	4.92857	128562	83769.3	0.651589	227767	217725	157086	187381	51724	80494	66875	107416	101629	144460	168493	140994	142140	101982	64814	123640	130289
2971	unkown4048	0.0065055	0.0420944	18	6	806907	0.658578	1	20	5.99998	1546237	0.0276461	0.147381	19	6.01666	797432	753105	0.944413	140736	111420	1250981	157426	1821126	1827775	2411657	124390	92251	121377	148240	72214	191658	180129	1187431	1459927	706171
2972	unkown4057	0.00421867	0.0314483	18	0	439342	0.157047	1	26.3284	17.9999	1.04348e+06	0.00551189	0.0467267	22.1642	18.6586	997668	609334	0.610758	2059900	2162065	1078100	2118664	488467	605996	464207	620856	574730	802007	964241	616890	1450407	1102632	479356	1141525	1.04563e+06
2973	unkown4058	0.0065055	0.0420944	18	6	194620	0.474273	1	20	6	834630	0.0209222	0.12051	19	6.01667	571474	284884	0.498507	383421	274395	408252	431557	1035087	889126	524995	889313	251593	369371	472691	426517	825069	418023	465233	526589	536952
2974	unkown4059	0.000572095	0.00854353	18	0	413555	0.180764	1	25.8651	17.9999	1.17685e+06	0.00105242	0.0162981	21.9326	18.5979	1.08454e+06	547267	0.504608	1963590	2061276	1112384	2136829	540983	697980	647247	730030	768805	886897	1055974	822624	1634943	1232176	667889	1172393	1.13325e+06
2975	unkown4068	8.77e-05	0.00272746	18	3	268450	0.107973	1	20	6.63e-05	620113	0.000118991	0.00479153	19	1.58336	439432	468403	1.06593	710937	925774	445784	397960	400952	500061	482274	321154	36282	69528	117025	26504	1155683	956153	777333	978521	518870
2977	unkown4070	0.000171384	0.00408964	18	3	2.58934e+06	0.116834	1	20	6.63e-05	5.83476e+06	0.000236651	0.00679805	19	1.58336	4.26296e+06	4.12451e+06	0.967522	6943637	8550346	4322187	3522887	4150095	4739867	5186285	3119272	585961	1058355	1315718	517871	10485835	8491720	7707040	8702173	4.96245e+06
2978	unkown4071	0.000171384	0.00408964	18	3	2.73496e+07	0.268759	1	20	6.63e-05	4.93116e+07	0.000506006	0.0107646	19	1.58336	4.00723e+07	3.8473e+07	0.96009	63423731	72172877	33075218	28574546	47142308	48672587	54468310	25965280	6135466	8838896	9619563	5445799	114792972	79409362	70713683	77102969	4.65971e+07
2980	unkown4080	1.91e-05	0.00111825	18	3	158415	0.0706715	1	20	5.43e-05	398045	1.96e-05	0.00152297	19	1.58336	283003	245976	0.869165	420086	540888	318209	312998	300884	322319	243291	195440	80863	91309	75317	99822	648958	473582	592535	478997	324719
2982	unkown4082	0.00267199	0.0224826	24	6	122118	0.0559575	1	20.7529	6	462698	0.00146649	0.0196804	22.3765	6.03175	319325	108367	0.339362	364472	416604	269471	290239	510102	436286	517037	387366	194919	229062	299818	220025	242343	123992	173605	345617	313810
2983	unkown4083	7.77e-06	0.000673899	18	3	1.10342e+06	0.0264245	1	23.1496	4.74e-05	3.515e+06	3.37e-06	0.000474531	20.5748	1.71459	2.48224e+06	1.98721e+06	0.800571	3626541	4348769	3394450	2690275	2115671	2279650	1948057	1877244	867805	890444	1141692	1117914	4744073	4064196	3893744	3760392	2.67256e+06
2984	unkown4084	0.00980952	0.0546185	18	3	341226	0.0495845	1	20	6.63e-05	946048	0.0041969	0.0385656	19	1.58336	740629	348278	0.470245	820012	1074782	1045256	844145	870139	922357	969622	619730	357168	337012	464227	406725	1183949	959238	967248	953512	799695
2985	unkown4090	0.000320124	0.0059414	18	0	121182	0.234966	1	27.1385	17.9999	174078	0.000789425	0.013641	22.5692	18.7693	184866	96709.7	0.523133	324496	310165	291861	376963	80408	106782	77565	118652	186294	154951	177489	150100	194782	246345	96098	159089	190752
2987	unkown4096	0.0210199	0.0924874	18	0	21751.3	0.430988	1	27.4766	17.9999	65372	0.0516739	0.225823	22.7383	18.8171	68694.5	18751	0.272962	85743	107397	73758	122243	45494	39552	75756	52209	70577	60958	55102	64882	68432	67972	51013	74071	69697.4
2989	unkown4101	0.000171384	0.00408964	18	6	67670.8	0.170279	1	20	6	173392	0.000333911	0.00827438	19	6.01667	112723	55752.9	0.4946	111305	87144	71727	117650	185011	207547	128645	172367	34543	46456	41285	24446	183262	120648	47642	115795	105967
2994	unkown4116	0.000171384	0.00408964	24	21	31278.5	0.0464138	1	23.9024	17.9999	141623	0.000101356	0.00431239	23.9512	19.497	111394	34681.1	0.311337	103800	127444	153807	122389	75597	80931	92362	72393	99097	82630	101532	104994	139501	141670	115382	169940	111467
2996	unkown4119	0.0299489	0.115346	18	3	281460	0.637454	1	20	6	446941	0.0946638	0.345727	19	4.43333	389286	284552	0.73096	487333	534093	199569	240887	506657	449849	585689	245570	47845	80938	84456	45130	1082944	582241	444143	550620	385498
2999	unkown4126	0.00267199	0.0224826	24	21	26002.4	0.0850133	1	22.4427	17.9999	137669	0.00213296	0.0247292	23.2214	19.4716	119103	26135.4	0.219436	125331	111763	158543	154176	82383	92945	94192	104688	112921	116143	100475	115840	137657	121316	136839	154866	120005
3001	unkown4131	0.0419656	0.142411	24	0	324718	0.196889	1	25.5652	6.63e-05	1.22806e+06	0.0478899	0.216851	24.7826	3.21e-05	752676	446398	0.593081	1350717	1611662	607460	1342421	376335	562760	536475	476196	305066	537921	612213	380854	1268223	772969	349666	784460	742212
3002	unkown4132	0.0299489	0.115346	18	0	183758	0.271847	1	25.4179	17.9999	920876	0.0473086	0.215083	21.7089	18.5412	834125	310782	0.372584	1328644	1484386	725770	1434459	493541	703931	623637	709901	581342	712058	761079	596093	1327618	868350	488811	998729	864897
3004	unkown4135	0.0299489	0.115346	24	21	37402.8	0.13721	1	24.8451	17.9999	199836	0.0266878	0.143288	24.4225	19.5318	160791	38932	0.242128	136344	217410	181208	155369	159272	98835	116898	156662	127440	128560	143968	140327	191504	220953	177082	209805	160102
3012	unkown4156	8.77e-05	0.00272746	18	3	540985	0.22259	1	20	6.01e-05	1.29491e+06	0.000231185	0.00676569	19	1.58336	1.11213e+06	755230	0.679083	1549612	1591749	1066322	971960	1357575	1344400	1309058	929283	394866	479659	524430	403055	2536020	1799505	1797604	1788312	1.24021e+06
3014	unkown4160	0.000572095	0.00854353	18	6	65584.5	0.797986	1	20	6.00001	328524	0.00396804	0.0371283	19	6.01667	197617	130545	0.660594	98386	119298	130801	203260	215796	152568	208816	736917	108181	96876	80090	104857	231409	145577	144672	131262	181798
3018	unkown4166	0.000320124	0.0059414	18	6	88047	0.433109	1	20	6	235878	0.00137034	0.0189712	19	6.01667	164851	67202.2	0.407654	171398	162927	117360	87621	289174	271271	209637	173431	23477	55667	55388	48724	321469	204446	144873	170457	156708
3019	unkown4167	0.0210199	0.0924874	18	6	11523	0.173365	1	20	6	78997.8	0.0241045	0.133881	19	6.01667	70894.6	5833.5	0.0822841	84555	64144	64987	75195	93995	80239	75086	66671	42695	42182	50615	51980	86036	77785	79892	86946	70187.7
3022	unkown4171	0.00980952	0.0546185	18	3	23294	0.358361	1	20	6	101725	0.0233792	0.131308	19	4.43333	93724.1	25959.9	0.276982	107290	70831	88636	102846	102229	105242	110006	89422	67484	63160	71627	59543	121765	106797	108089	119090	93378.6
3024	unkown4173	0.000320124	0.0059414	18	6	14815.8	0.673249	1	20	6	75685.8	0.00203507	0.0242167	19	6.01667	65299.9	10592.7	0.162216	56919	49925	59365	65076	86381	72130	83283	60949	49001	40058	47457	44947	82375	76420	71240	78734	64016.2
3025	unkown4175	0.00267199	0.0224826	18	6	20459.4	0.62589	1	20	6	85137.8	0.0123647	0.0836251	19	6.01667	72678.4	11914.9	0.16394	79347	54273	65777	62780	97816	80722	90349	71664	42812	42959	43958	41855	114881	67661	82484	100415	71234.6
3030	unkown4187	4.22e-05	0.00200244	18	3	58464.3	0.244659	1	25.5652	6.63e-05	110254	0.000128805	0.00484093	21.7826	1.81525	100965	128079	1.26855	151080	129889	60670	99376	90213	112598	113116	45462	14002	19922	18404	12804	287194	192675	153967	215791	107323
3033	unkown4203	0.00980952	0.0546185	24	12	107996	0.230466	1	24.9858	12	612039	0.0160334	0.101703	24.4929	12.0049	508016	137164	0.269999	462174	263765	413657	361854	543482	602731	497688	625647	633947	563474	806473	444262	431835	472485	447311	593202	510249
3034	unkown4204	0.0210199	0.0924874	18	0	215466	0.131141	1	26.3284	17.9999	438706	0.0190032	0.112286	22.1642	18.6586	424769	275661	0.648966	929343	1038836	501922	848198	201248	313320	217782	283945	196469	289308	358377	209873	755590	448206	169838	381195	446466
3035	unkown4207	0.00421867	0.0314483	18	0	203835	0.0966061	1	24.7059	17.9999	653588	0.00358861	0.0344905	21.3529	18.455	520851	269382	0.517197	890963	936454	567036	940704	268061	388522	343443	348534	347418	368836	482576	332473	989580	637123	406535	581121	551836
3036	unkown4209	0.000572095	0.00854353	18	12	100495	0.0403083	1	20	12	253268	0.000269283	0.0073694	19	12.0333	140270	126106	0.899026	46945	37686	109809	57663	110683	92879	118365	202620	270636	252368	306397	183673	26913	62175	38771	88379	125373
3037	unkown421	0.0299489	0.115346	18	0	415076	0.114058	1	28	6.63e-05	1.44203e+06	0.022816	0.129434	23	2.72e-05	633840	397953	0.627844	1544088	1355085	837928	2031060	308390	381331	352528	363024	209203	390650	468151	303885	810736	411192	221318	382934	648219
3038	unkown4213	7.77e-06	0.000673899	18	3	248220	0.0458645	1	20	6.96e-05	755311	5.65e-06	0.00074912	19	1.58337	506909	434170	0.856505	796370	936101	644076	644703	464641	513486	487992	335357	159532	159863	167509	176210	1247603	887298	866550	801365	580541
3039	unkown4216	7.77e-06	0.000673899	18	3	75730.1	0.0163655	1	23.52	6.63e-05	234802	2.15e-06	0.00037228	20.76	1.73003	154802	140866	0.909978	254178	253698	240740	190595	123164	143630	94579	92481	45956	37904	54503	74239	296150	265825	235596	271772	167188
3040	unkown4219	2.89e-06	0.000406746	18	3	1.55296e+06	0.0413683	1	20	4.69e-05	4.86245e+06	2.02e-06	0.000364869	19	1.58336	3.53676e+06	2.45153e+06	0.693157	5150399	5474407	4702259	4122744	3355631	3791847	3297666	2935921	1518326	1458900	1625007	1637554	7395092	5858373	5815648	5100582	3.95252e+06
3042	unkown4220	0.000320124	0.0059414	24	0	62989.4	0.0683511	1	21.3559	7.25e-05	193933	0.00025666	0.0071453	22.678	3.85e-05	136219	78234.1	0.574325	201177	188819	184025	201713	143549	108922	116268	140125	74167	59842	42245	75781	277645	170046	131169	125522	140063
3043	unkown4223	0.000987235	0.0119368	18	3	24770.7	0.155513	1	23.6461	6.63e-05	142356	0.00150175	0.0198619	20.8231	1.73528	113611	51327.4	0.451782	140764	121476	211889	95294	105450	84871	119594	80458	70857	59825	77140	100328	170925	162592	129217	157164	117990
3044	unkown4224	8.77e-05	0.00272746	18	3	324522	0.0165847	1	20.464	6.58e-05	1.26773e+06	2.1e-05	0.00154039	19.232	1.6027	954505	401798	0.420949	1146386	1388204	1371030	1165320	910319	945124	940392	896222	582031	581184	617033	670827	1389471	1210028	1206313	1269776	1.0181e+06
3045	unkown4226	8.77e-05	0.00272746	18	3	24851.8	0.0668257	1	22.5575	5.08e-05	127875	7.65e-05	0.00370775	20.2788	1.68992	104394	39029.6	0.37387	119801	152654	123664	115380	69904	107525	112841	97014	84768	60487	84317	67701	155379	139734	126218	120849	108640
3047	unkown4230	0.000320124	0.0059414	18	3	24558.5	0.0221808	1	23.2718	6.63e-05	125419	9.13e-05	0.004076	20.6359	1.71969	100975	36472.8	0.361207	121525	136316	128590	115245	100772	84893	74188	103862	84501	67112	73871	68977	120563	131685	121278	136578	104372
3050	unkown4236	0.0299489	0.115346	24	9	18003.8	0.990419	1	28	6.63e-05	172867	0.13401	0.431012	26	4.87503	84543.4	54033	0.639116	38548	43500	63346	546078	53437	55444	82261	78492	65342	65600	52098	58333	28863	25870	26576	26556	81896.5
3053	unkown4240	0.00421867	0.0314483	18	6	42427.1	0.28247	1	20	6.00001	130476	0.00921433	0.0676818	19	6.01667	101460	24184.4	0.238364	118106	131925	61929	78914	139264	166127	131762	84751	31634	35551	44621	26324	163209	132107	118656	111589	98529.3
3057	unkown4244	0.000572095	0.00854353	18	3	23078.2	0.168686	1	25.5652	4.42e-05	179707	0.000988774	0.0156469	21.7826	1.81524	171194	63849.7	0.372968	222261	191000	170256	135310	143224	179465	144272	160072	149340	116009	133325	124922	244936	249036	224196	202191	174363
3058	unkown4246	0.0419656	0.142411	18	6	79199.3	0.999991	1	20	5.99999	491220	0.175033	0.508227	19	6.01666	440609	66102	0.150024	351086	323032	319155	437977	488167	507106	535028	434581	289284	409033	386699	398418	570835	488068	465849	517255	432598
3062	unkown4264	0.000171384	0.00408964	18	6	306895	0.485277	1	20	5.99999	733194	0.00086451	0.0144405	19	6.01666	467377	263021	0.562759	458304	430707	192825	241062	759707	831674	862792	478605	115324	171563	155534	46708	940714	539071	278574	464908	435504
3063	unkown4265	0.0144977	0.0712252	18	0	145902	0.191532	1	25.5652	17.9999	423541	0.0191222	0.112733	21.7826	18.5596	372236	211359	0.567808	757575	764995	357213	732348	143634	242434	249256	276787	217381	290466	335890	217303	668741	385656	176983	462788	392466
3064	unkown4267	0.0065055	0.0420944	18	0	187678	0.354342	1	25.2722	17.9999	490618	0.0163035	0.102634	21.6361	18.5231	432795	205849	0.475628	785852	807765	412469	763180	195075	224569	265901	342259	327045	374793	455234	344972	763666	510639	193577	494594	453849
3070	unkown4281	0.0210199	0.0924874	24	21	27506.5	0.269971	1	23.9024	17.9999	156521	0.035023	0.17425	23.9512	19.497	142083	31796.8	0.22379	134872	199186	197346	143274	103635	126015	96711	132732	131143	115961	147248	120185	188189	145438	144784	147675	142150
3071	unkown4282	0.0210199	0.0924874	24	21	28499.8	0.169515	1	22.1053	18	186674	0.0236492	0.13233	23.0526	19.4712	161649	29337.3	0.181487	177746	171646	203629	161903	115823	114837	166181	124644	183969	132368	143531	163277	177890	162914	191461	214430	162891
3075	unkown4296	7.77e-06	0.000673899	18	3	69538.3	0.0232668	1	23.7736	6.63e-05	178297	2.99e-06	0.000443289	20.8868	1.7406	116778	127921	1.09542	199732	222131	161146	130182	105957	82002	74556	60242	27878	25499	19632	32477	257565	214756	208080	215901	127358
3079	unkown4301	0.000320124	0.0059414	18	6	115647	0.266918	1	20	6	364232	0.000885882	0.0147429	19	6.01667	257529	98538.8	0.382632	219270	248815	210360	230119	386001	458138	293054	319735	104060	125505	132686	108717	445349	231833	163445	252320	245588
3081	unkown4303	0.000572095	0.00854353	18	6	70972.5	0.295688	1	20	5.99999	206516	0.00163827	0.0211708	19	6.01666	137283	66732.6	0.486094	112279	124852	93240	108040	205665	260280	154350	205767	42733	72608	65548	51365	244837	108580	82201	134804	129197
3082	unkown4304	0.0419656	0.142411	18	6	13073.7	0.999438	1	28	6	51876.2	0.17496	0.508227	23	6.29762	49153.4	6852.86	0.139418	32460	56381	29919	40801	43171	56265	60092	47977	24251	39078	23403	21580	179117	38011	60200	37526	49389.5
3088	unkown431	0.0419656	0.142411	18	0	294466	0.440967	1	26.9725	17.9999	495824	0.0923365	0.340505	22.4862	18.7462	520627	382935	0.735526	1265175	1122190	372193	1582724	202882	234688	288824	165820	224138	481476	577302	224505	1005657	324398	191309	461934	545326
3096	unkown4321	0.0065055	0.0420944	18	6	16130.2	0.650186	1	20	6	71040	0.0273481	0.146484	19	6.01667	58672.6	12176.7	0.207537	57811	61486	35841	52706	84095	75461	67904	56700	31241	38126	46200	40754	80520	55538	58582	72187	57197
3103	unkown4328	0.000320124	0.0059414	18	6	18347.3	0.43345	1	20	6	76350	0.00137131	0.0189712	19	6.01667	61667.7	14161	0.229635	60264	48024	48924	62829	78703	81745	81679	63273	34790	44939	41593	39240	84878	60504	50221	77620	59951.6
3108	unkown4332	0.00980952	0.0546185	18	6	14980.8	0.102915	1	20	6	79942.2	0.00797368	0.0608482	19	6.01667	67159.5	10268.2	0.152893	70029	67860	62182	71486	85371	83522	83214	67662	51049	41866	42153	41274	87335	66651	57388	75601	65915.2
3109	unkown4333	0.000320124	0.0059414	18	6	11734.3	0.32912	1	20	6	63439.2	0.00107025	0.0164114	19	6.01667	54993.9	7840.81	0.142576	57202	47718	49531	51933	68264	67564	56939	60990	30918	40102	36179	47350	62967	57589	64412	65042	54043.8
3110	unkown4334	7.77e-06	0.000673899	18	6	38824.4	0.0766966	1	20	5.99998	159019	9.14e-06	0.000963148	19	6.01666	120233	37811	0.314481	101460	110516	99756	104926	173804	168122	139076	155074	79173	87030	75029	85398	131318	123951	115128	100656	115651
3123	unkown4352	0.0210199	0.0924874	18	6	34246.8	0.984253	1	20	6	190616	0.100924	0.359546	19	6.01667	164778	28576.6	0.173425	134351	137022	120693	170314	191470	210067	198223	162702	89817	143278	135957	147099	242425	174155	143450	180022	161315
3127	unkown4357	0.0065055	0.0420944	18	6	11305.2	0.184856	1	20	6	64402	0.00928785	0.0677803	19	6.01667	53809.6	8863.66	0.164723	55179	61111	43971	54756	76434	62773	52930	65471	36915	37731	29184	49510	61730	51506	58698	45869	52735.5
3128	unkown4358	0.0144977	0.0712252	24	3	15963.6	0.0993792	1	20	5.98e-05	89697.5	0.0108671	0.0757508	22	1.37503	75880.7	23778.1	0.313361	96693	104799	80656	76642	79631	103652	70759	93901	45535	44523	49982	67047	86662	93755	64983	75093	77144.6
3130	unkown436	0.00164724	0.0165458	18	0	881525	0.205648	1	27.6489	17.9999	719026	0.00304546	0.0304301	22.8245	18.8418	990267	1.18447e+06	1.19611	3180605	2616312	1266988	4409124	118134	95287	105030	120506	287547	894311	464182	352900	1343649	878527	93416	560518	1.04919e+06
3132	unkown4376	0.00267199	0.0224826	24	12	106785	0.0653709	1	20	12	385994	0.00168603	0.0215361	22	12.1	282331	135043	0.478314	211278	294153	179469	156549	318627	279333	375485	248066	316845	406552	427145	393435	162015	168015	213821	239032	274364
3133	unkown4377	0.0065055	0.0420944	18	12	53126.9	0.126373	1	20	12	302272	0.00666213	0.053654	19	12.0333	234887	79962.7	0.34043	198213	255933	162154	134986	256746	243728	288308	184868	247357	321182	320449	320100	168050	127789	171325	205871	225441
3134	unkown4378	0.00164724	0.0165458	24	12	74173	0.0824857	1	20	12	338967	0.00134567	0.0189712	22	12.1	254476	104888	0.41217	225296	253318	160498	146931	255821	245306	324860	232113	268585	350281	384611	352392	187596	161353	188795	234862	248289
3135	unkown4380	0.00164724	0.0165458	24	12	109875	0.0851609	1	20	12	494446	0.00138483	0.0190997	22	12.1	362361	163544	0.451329	297462	363129	233181	214961	365951	331564	457968	345437	366324	548144	518540	544778	217660	217854	309296	311155	352713
3136	unkown4381	0.00164724	0.0165458	24	12	64550.7	0.0833633	1	20	12	305010	0.00135853	0.0189712	22	12.1	216339	105780	0.488958	173718	205151	130967	127658	216584	183007	286988	186779	214198	344948	329477	331417	148942	133802	173606	174327	210098
3137	unkown4383	0.0065055	0.0420944	24	21	43937.3	0.151914	1	21.0501	17.9999	338027	0.00782668	0.0600312	22.5251	19.4853	304123	40218	0.132243	366116	329336	321870	309523	253045	293013	243437	249865	296119	302050	341094	251607	344364	315018	312610	380116	306824
3139	unkown4385	0.0144977	0.0712252	24	21	34137.7	0.17308	1	22.3291	17.9999	207172	0.0175342	0.106432	23.1646	19.4712	182307	31250.9	0.171419	215423	213084	205157	173620	151391	178030	123273	149074	177235	157322	212915	150269	213320	206043	181073	228253	183468
3151	unkown44	2.89e-06	0.000406746	18	3	2.22522e+06	0.0577325	1	20	6.63e-05	6.02364e+06	2.77e-06	0.000443289	19	1.58336	4.6006e+06	3.17614e+06	0.690376	6667259	6796257	5545182	5085905	5593519	5020366	4135575	3740813	1783567	1904077	2052859	2077797	8500010	7585110	8661847	7077830	5.13925e+06
3156	unkown4404	0.000320124	0.0059414	18	9	321601	0.0195511	1	23.52	6	1.1455e+06	8.12e-05	0.00385717	20.76	7.83796	860887	348466	0.404775	589606	672165	486340	426545	1136156	1104081	1268823	1072941	823188	1039008	1087664	950376	668897	481448	518834	666417	812031
3176	unkown443	0.00164724	0.0165458	18	12	99509.4	0.102158	1	24.8451	12	490161	0.00163061	0.0211708	21.4225	12.3143	335405	246521	0.734997	316039	256658	117766	341784	482626	378062	217670	637522	466108	419008	462348	613181	120656	84851	90669	95406	318772
3177	unkown4432	0.00980952	0.0546185	18	12	19986.4	0.124022	1	23.6461	12	153304	0.00938203	0.068321	20.8231	12.2247	126866	36672.6	0.289065	95817	110727	86713	120330	150001	137670	162500	107552	136696	178124	124224	174173	104203	78067	105961	108700	123841
3179	unkown4435	0.0299489	0.115346	24	18	80658.8	0.0806285	1	20	12	584417	0.0169663	0.104931	22	14.85	502659	155226	0.30881	501407	494458	416464	565280	391964	361625	474528	340152	498232	594689	642401	602347	588095	499405	501768	592835	504103
3182	unkown444	0.0210199	0.0924874	18	0	326058	0.682416	1	28	12	445419	0.0752273	0.292731	23	4.92857	428501	431623	1.00728	934798	889571	435981	959220	104769	210374	163221	204387	431513	463061	470626	416475	471913	270766	166240	405493	437400
3191	unkown4457	0.00164724	0.0165458	24	0	14728.7	0.0200351	1	20.8511	6.63e-05	92649.2	0.000373554	0.0089139	22.4255	3.57e-05	74500.3	19883.3	0.266889	84781	86630	92761	106425	73271	85532	79868	80087	55349	45195	47539	54344	88346	72159	81271	77456	75688.4
3194	unkown4460	0.0299489	0.115346	18	3	80970.6	0.573808	1	20	6.63e-05	411396	0.0870198	0.327101	19	1.58336	376785	118764	0.315203	280517	603561	405358	356148	424161	350626	517212	278875	238068	293794	290688	271244	494800	501932	547636	496213	396927
3195	unkown4465	0.0299489	0.115346	24	21	8147.64	0.443737	1	20.6557	17.9999	163530	0.0707103	0.281717	22.3279	19.497	154056	11629.1	0.075486	163506	162972	164920	159876	154806	144735	112662	153545	164388	155745	136566	151316	154908	162187	171677	165347	154947
3213	unkown4493	0.0419656	0.142411	24	21	11430	0.303595	1	23.0287	17.9999	162294	0.068327	0.275384	23.5144	19.4773	148863	12521.3	0.0841133	148346	159991	149670	150796	128687	143653	121751	142141	140922	129311	164793	156825	178633	142765	166241	161539	149129
3220	unkown45	7.77e-06	0.000673899	18	3	5.03529e+07	0.065585	1	20	6.63e-05	1.32615e+08	7.89e-06	0.000876517	19	1.58336	1.02578e+08	6.97662e+07	0.680126	150572931	149629525	120318909	109937865	122017151	119087061	93474145	86360322	40066850	42042684	45675041	46538453	189149952	167046163	193095448	155552294	1.1441e+08
3225	unkown4507	0.0419656	0.142411	18	3	6242.16	0.714414	1	27.3065	6.63e-05	100139	0.135129	0.431409	22.6533	1.8878	102839	25034.4	0.243433	94782	114086	100324	91365	94054	126176	85108	89489	83359	71353	96351	104417	142887	114813	105106	141588	103454
3231	unkown4513	0.0210199	0.0924874	18	15	27460.8	0.487235	1	20	12	373904	0.0571615	0.241472	19	13.6167	331080	47464.4	0.143363	326744	321137	342249	311887	281629	338626	273724	316063	342933	348210	422597	381876	291543	300193	306552	383958	330620
3234	unkown4517	0.0299489	0.115346	18	3	72365.3	0.608805	1	25.2722	7.76e-05	1.09771e+06	0.0912477	0.338705	21.6361	1.80304	1.06598e+06	155193	0.145587	1176002	1196152	849871	1168807	1040789	1036806	1097317	911325	905046	984247	961507	1020595	1334837	1061580	1103352	1342964	1.07445e+06
3237	unkown452	0.0065055	0.0420944	18	15	318311	0.877135	1	20	12	588807	0.0351856	0.174573	19	13.6167	384641	331499	0.861838	357917	720349	251315	768157	175250	137217	165513	146556	632338	433407	679157	610325	353626	319510	134091	218168	381431
3240	unkown4523	0.0299489	0.115346	18	6	20390	0.978561	1	20	6	108394	0.132758	0.428896	19	6.01667	90728.2	20262.2	0.223328	44754	73442	76039	97030	120159	118619	96150	98648	56225	70045	67506	100314	110167	89932	98251	95084	88272.8
3242	unkown4525	0.0299489	0.115346	24	15	16318.3	0.273869	1	24.9858	12	117732	0.0475997	0.215971	24.4929	13.5357	99988.5	20857.2	0.208596	90549	73127	61763	96766	122473	105774	74277	87822	100223	121576	126085	123042	94912	124159	96890	103379	100176
3271	unkown456	0.00267199	0.0224826	18	15	178091	0.975575	1	20	12	345978	0.0181159	0.108991	19	13.6167	254053	200799	0.790382	533902	469895	222161	340844	89366	87845	110657	104153	252882	463388	441254	226390	246184	131303	160840	152677	252109
3273	unkown4561	0.0065055	0.0420944	24	21	11680.3	0.133452	1	23.9024	17.9999	55379.2	0.00698803	0.055574	23.9512	19.497	45364.9	13644.1	0.300764	54084	67939	45794	46396	38023	34380	25755	40276	48264	27589	37026	39252	56082	48940	68536	47959	45393.4
3274	unkown4562	0.0210199	0.0924874	18	0	57552.7	0.217435	1	24.9858	17.9999	311115	0.0291967	0.154008	21.4929	18.4883	292466	45171	0.154449	352486	361782	369161	309797	222614	322595	273815	240120	312392	222882	244204	281717	327188	269943	307909	339423	297377
3276	unkown4564	0.0065055	0.0420944	18	6	74838.4	0.852459	1	20	6	416686	0.034354	0.172152	19	6.01667	351953	71138.2	0.202124	288952	272810	347588	276826	437139	393044	473759	362802	335846	310867	238031	254295	412315	377037	297865	414151	343333
3277	unkown4566	0.00421867	0.0314483	24	0	32237.7	0.0917705	1	23.1496	7.72e-05	361104	0.00342887	0.0334	23.5748	3.93e-05	320483	44399	0.138538	366740	393949	328162	355566	304000	323888	315515	333529	247759	315905	264289	278721	323776	289057	335896	361301	321128
3280	unkown4569	0.000572095	0.00854353	24	0	82785.2	0.0519869	1	25.2722	6.63e-05	672182	0.000339735	0.00832721	24.6361	3.23e-05	569545	103948	0.182511	668266	727075	594355	699034	469444	530190	550062	527573	481301	520025	429828	552318	595530	550829	605878	578780	567530
3298	unkown459	0.0210199	0.0924874	18	3	43982.7	0.209501	1	24.2975	6.63e-05	317501	0.028295	0.150308	21.1488	1.76243	267710	100835	0.37666	311835	379687	230396	348089	141586	248869	303862	201210	200509	249409	189347	168420	243958	345610	445728	391529	275003
3305	unkown46	1.91e-05	0.00111825	18	3	295998	0.0768539	1	20	6.63e-05	790438	2.12e-05	0.00154039	19	1.58336	611243	439261	0.718636	854535	953324	693693	660203	712040	673885	550266	489866	229081	250852	256757	271754	1150557	1060660	1250443	913899	685738
3306	unkown4600	0.0419656	0.142411	24	21	14684.8	0.214391	1	20	17.9999	124656	0.0513809	0.225416	22	19.525	111150	13328.1	0.119911	137189	115296	111246	112297	101844	82061	81900	101812	123355	104125	100485	127854	125179	103222	133710	136513	112380
3309	unkown4603	0.0144977	0.0712252	24	0	16397.3	0.247171	1	23.6461	6.63e-05	87974.9	0.0237632	0.132803	23.8231	3.34e-05	75299.3	22214.3	0.295013	73614	93128	100113	85045	59526	57782	81070	68012	75200	58767	51231	52064	119822	74944	75280	81287	75430.3
3311	unkown4607	0.000572095	0.00854353	18	12	18153.6	0.0841641	1	20	12	93879.5	0.000526817	0.0110594	19	12.0333	72024.8	25834	0.358682	62815	57596	61285	43839	73365	61013	77146	87926	78453	87587	89821	119657	52719	47583	58003	44759	68972.9
3315	unkown4610	0.0419656	0.142411	24	0	18256.4	0.191006	1	23.52	6.63e-05	80120.4	0.0467023	0.213155	23.76	3.35e-05	64766.1	24404	0.376802	87708	58982	85750	88042	53904	42882	69183	59266	66487	24299	31635	62889	78720	66247	73282	90126	64962.6
3316	unkown4612	0.0144977	0.0712252	18	0	143502	0.390023	1	24.9858	17.9999	720114	0.034918	0.17425	21.4929	18.4883	687891	113149	0.164487	811558	780291	841234	886687	638019	512301	683085	499339	663645	622294	566934	817230	799560	616083	747134	717680	700192
3327	unkown4628	0.0065055	0.0420944	18	3	30750.3	0.615989	1	20	6.63e-05	253232	0.0261262	0.141282	19	1.58336	241205	50200.1	0.208123	269701	294771	213098	235359	259333	270905	219303	219299	198195	208102	199115	197828	356229	305196	219115	329944	249718
3329	unkown463	0.0210199	0.0924874	18	15	72726.1	0.984408	1	28	12	125278	0.100936	0.359546	23	14.5119	110110	116104	1.05444	205684	160336	76625	392081	24473	31859	39690	58066	149425	136147	114718	100823	70822	62377	31548	101466	109759
3343	unkown4655	0.00980952	0.0546185	24	12	39436.8	0.264138	1	25.4179	12	270432	0.0180226	0.108811	24.7089	12.0099	236984	47604.5	0.200877	174027	199781	225319	147955	231435	292740	229602	299615	302343	282496	232950	263941	176089	274045	250475	226815	238102
3345	unkown4664	0.00164724	0.0165458	24	21	87186.6	0.0717151	1	24.1644	17.9999	485639	0.00118648	0.0177187	24.0822	19.5053	398269	101091	0.253826	455028	434086	510187	374590	311916	313306	350913	278689	346019	376810	288656	383889	461759	436516	440920	603366	397916
3352	unkown4688	0.0210199	0.0924874	18	0	93670.1	0.30631	1	22.1053	17.9999	538664	0.0389242	0.187752	20.0526	18.1906	427486	119546	0.27965	479934	524305	711282	404345	236561	356077	427595	236578	440237	477819	383115	338852	393629	465899	608741	686389	448210
3355	unkown4691	0.00980952	0.0546185	24	0	207954	0.129519	1	24.0327	6.63e-05	1.36648e+06	0.00974274	0.0704163	24.0163	3.31e-05	1.19928e+06	257851	0.215005	1351049	1425943	1469827	1219109	876216	1199746	1084654	1054512	1153684	946083	975902	1074740	1329849	1089710	1317949	1617290	1.19914e+06
3362	unkown4704	0.0419656	0.142411	24	21	203844	0.25544	1	24.4321	6.63e-05	1.83041e+06	0.0593408	0.249187	24.2161	22.7026	1.73981e+06	218130	0.125376	1737743	2045025	1783964	1754900	1563428	1607766	1780159	1471735	1615677	1576782	1396830	1753869	2139393	1637496	2043689	1896662	1.73782e+06
3364	unkown4706	0.0299489	0.115346	18	9	63652.3	0.946464	1	28	5.99999	362998	0.129349	0.421848	23	8.21428	293851	57484.5	0.195624	185570	303394	235540	53676	342419	416053	354326	339196	319232	272478	302624	284589	206630	292964	280898	470176	291235
3369	unkown4716	0.00267199	0.0224826	18	0	88421.9	0.0835262	1	20	17.9999	486292	0.00209959	0.0245385	19	18.05	419209	78104.6	0.186314	484616	492285	495396	517096	270277	324755	325199	365225	522118	414391	373492	448860	423359	474687	569936	477186	436180
3371	unkown472	0.00980952	0.0546185	18	12	414635	0.082009	1	20	12	1.11696e+06	0.00653658	0.0531495	19	12.0333	584258	584743	1.00083	603629	500749	181852	411028	250352	345056	361149	347219	1168760	1184668	826343	1288083	229796	230755	70289	243154	515180
3376	unkown4730	0.0419656	0.142411	18	6	79032.3	0.963882	1	20	6	966593	0.170201	0.503347	19	6.01667	913870	52042.3	0.0569471	933028	942904	817839	810610	1082362	1025884	759454	998672	718142	917793	757539	710397	1169924	871328	1044260	960875	907563
3384	unkown4750	0.0144977	0.0712252	24	0	96352.3	0.197964	1	24.8451	6.63e-05	566412	0.0196695	0.115058	24.4225	3.26e-05	445307	130321	0.292654	603497	459357	563030	639766	467117	394566	406561	363319	385196	225148	238889	507810	514637	380418	532914	415164	443587
3386	unkown4755	0.0144977	0.0712252	24	21	68614.8	0.279746	1	20	17.9999	610655	0.0263929	0.142213	22	19.525	529491	88996.2	0.168079	583814	723464	600534	455225	455908	199791	489357	461944	552524	535128	536122	566909	699890	565828	605711	571191	537709
3391	unkown4761	0.00980952	0.0546185	18	3	116756	0.142864	1	24.1644	6.63e-05	1.59625e+06	0.0106092	0.0745286	21.0822	1.75688	1.46246e+06	234554	0.160383	1641857	1537065	1497226	1708846	1362616	1206985	1589468	1208195	1169433	1301185	1202062	1576383	1765802	1609352	1748510	1555558	1.48003e+06
3396	unkown4768	0.0065055	0.0420944	24	0	238316	0.117604	1	23.9024	6.63e-05	1.87666e+06	0.00625488	0.0515962	23.9512	3.32e-05	1.66729e+06	308105	0.184795	1777108	1858798	1917823	1952927	1551454	1421642	1624470	1521531	1542357	1386937	1258698	1618041	2171382	1529179	1834463	1717664	1.66778e+06
3414	unkown4808	0.0144977	0.0712252	18	6	54375.8	0.317911	1	20	6	743820	0.0294042	0.154383	19	6.01667	700183	35321.9	0.0504467	719262	744491	656222	682599	751793	782767	726856	713866	678266	619925	602442	557749	747492	669197	794513	686999	695902
3425	unkown483	0.0299489	0.115346	18	0	693404	0.646668	1	28	12	2195705	0.0957541	0.347986	23	4.92857	2.23034e+06	987876	0.442926	2770528	3472003	2661264	3659255	1367841	1715837	1617027	1946724	1940767	1995583	2491634	2354836	2027201	1868200	1338731	2783915	2.25071e+06
3429	unkown4834	0.0065055	0.0420944	18	0	76866	0.327105	1	23.9024	18	856688	0.0152205	0.0972304	20.9512	18.3644	823312	71087.9	0.0863438	911664	880817	940912	891812	671069	832754	779139	749624	831660	816933	739052	852257	769677	884905	914927	857245	832778
3440	unkown485	0.0065055	0.0420944	24	3	229568	0.0582326	1	22.5575	6	658890	0.00336343	0.0328335	23.2788	4.55084	491268	150221	0.305783	559882	544859	671180	795355	775237	738341	510422	611561	316995	330637	428822	129877	478584	286592	220511	432274	489446
3445	unkown4856	0.0065055	0.0420944	18	3	54189.8	0.23419	1	25.5652	6.63e-05	1.0317e+06	0.0114062	0.0787779	21.7826	1.81525	997313	186501	0.187004	1065578	1154781	1042052	864406	927029	902537	1007855	829518	880973	844957	778572	1052495	1343614	1066212	1096958	1247607	1.00657e+06
3448	unkown4860	0.0299489	0.115346	24	21	41821.5	0.288371	1	23.52	17.9999	108522	0.0496747	0.221376	23.76	19.4868	77834.8	43654.3	0.560859	59786	165362	102951	95074	60765	22510	58817	18271	67431	30896	45182	91475	142543	48724	134970	107852	78288.1
3453	unkown4867	0.0299489	0.115346	18	3	71517	0.271265	1	20	6.63e-05	597891	0.0472248	0.215083	19	1.58336	561678	80065.5	0.142547	538982	641125	667172	544286	605422	567046	631609	575211	534634	448199	491754	440275	645134	593894	571802	707559	575256
3457	unkown4873	0.0299489	0.115346	18	9	19534	0.946427	1	28	5.99999	79853	0.129345	0.421848	23	8.21428	65585.5	11606.7	0.176971	42898	63863	32080	28469	91825	83069	78171	66347	71596	63630	76168	49482	63551	67819	49190	112759	65057.3
3459	unkown4877	0.00980952	0.0546185	24	0	5429.52	0.718237	1	26.6465	6.63e-05	138527	0.0419588	0.197944	25.3233	3.15e-05	123520	12299.2	0.0995722	133454	124201	123738	172716	116299	117865	119853	118675	138959	111841	94150	112044	121967	119028	118917	125320	123064
3460	unkown4878	0.0299489	0.115346	18	12	39276.6	0.234431	1	20	12	131978	0.0418369	0.197576	19	12.0333	91549.2	45822.7	0.500526	68894	51721	62730	63015	71336	100676	64778	132630	123423	144267	170270	89952	13065	79228	39870	102321	86136
3467	unkown4886	0.00267199	0.0224826	18	0	14201.2	0.113181	1	20	17.9999	81536.5	0.00275312	0.0284469	19	18.05	71056.8	13508.3	0.190105	82138	74705	92068	95200	60656	52627	69756	44267	66008	66363	70252	83683	84202	80697	80621	80626	73991.8
3468	unkown4887	0.0210199	0.0924874	18	12	21763.3	0.487225	1	20	12	177503	0.0571605	0.241472	19	12.0333	154225	26687.7	0.173044	140806	141259	167716	138919	123282	143281	156764	161094	177392	164499	192975	175147	110558	135647	124132	163688	151072
3477	unkown4897	0.0210199	0.0924874	18	3	10049.6	0.3446	1	24.7059	6.63e-05	77391.7	0.0429367	0.201872	21.3529	1.77944	68945.1	23323.2	0.338286	66415	82697	73019	87436	48308	64024	82512	44927	67941	42750	32152	73287	116377	77672	88019	79704	70452.5
3481	unkown490	0.0419656	0.142411	18	0	133430	0.699171	1	28	12	150277	0.132879	0.42898	23	4.92857	146097	176859	1.21056	496039	306365	285909	209869	22202	101576	27097	41280	69247	245130	182775	103956	129468	64053	38059	72868	149743
3483	unkown4901	0.0144977	0.0712252	24	0	16302.3	0.0826513	1	20	6.63e-05	90393.2	0.00925878	0.067705	22	3.65e-05	78226.9	19174.5	0.245115	94252	78766	95517	93038	82527	76416	95561	63967	69368	52812	53182	56338	91006	86407	103446	83080	79730.2
3484	unkown4902	0.0419656	0.142411	18	3	2387.9	0.798045	1	26.4865	6.63e-05	137349	0.147241	0.457023	22.2432	1.85363	137556	17114.4	0.124417	129778	132871	130335	156411	153553	123162	123999	118405	115231	117551	128226	153635	190516	138569	138456	159913	138163
3490	unkown4909	0.0299489	0.115346	18	0	31040.9	0.595053	1	20	17.9999	268779	0.0895938	0.33394	19	18.05	255799	22838.8	0.0892842	282526	283732	268707	305925	231656	229341	211585	243299	309716	224365	267150	239071	244449	278489	248190	303988	260762
3493	unkown4914	0.00421867	0.0314483	18	0	12105.1	0.29072	1	20	17.9999	73271.7	0.00944814	0.0685066	19	18.05	67707.4	11060.4	0.163356	78498	81563	84699	87157	53674	52510	68675	53312	73245	51355	70176	73819	68851	63622	79716	80898	70110.6
3496	unkown4919	0.0299489	0.115346	24	12	29211.6	0.126959	1	20	12	382695	0.0249892	0.13657	22	12.1	328181	52416.5	0.159718	282701	304419	315598	290294	301218	355388	246470	324078	362719	374424	429657	363980	287161	322078	312545	328689	325089
3500	unkown4923	0.00267199	0.0224826	18	3	33610.2	0.187905	1	23.52	6.63e-05	241054	0.00431626	0.0387776	20.76	1.73003	204452	65370.1	0.319734	233326	198952	318017	213924	172731	174561	214262	181510	186173	124820	154925	162873	319172	210840	268741	228365	210200
3504	unkown4928	0.00421867	0.0314483	24	12	31046.9	0.0782873	1	24.1644	12	89685.8	0.00297757	0.0299083	24.0822	12.0001	65322.1	39008.1	0.597165	22866	48593	45401	28469	101368	124963	61198	66637	103440	83895	89444	81964	67719	48534	49190	23154	65427.2
3506	unkown493	0.0419656	0.142411	24	6	170656	0.148775	1	20	6	843060	0.0379365	0.184767	22	6.05	619264	170815	0.275835	785199	561823	399829	715776	880288	785074	792128	914749	402715	488972	693308	300885	578171	556709	294662	588412	608669
3508	unkown4931	0.000987235	0.0119368	18	3	116498	0.204958	1	23.52	5.91e-05	1.65952e+06	0.00192337	0.0233183	20.76	1.73003	1.54449e+06	273196	0.176884	1654318	1513897	1928073	1541807	1394270	1474864	1578364	1517575	1476850	1237419	1435500	1231739	1984025	1597638	1731562	1798306	1.56851e+06
3512	unkown4937	0.000987235	0.0119368	18	0	60074.4	0.099704	1	20	17.9999	199758	0.00100657	0.0158538	19	18.05	158680	52511.4	0.330926	220797	186431	225669	234398	116840	136942	89617	77504	148568	140897	138297	206445	193404	156783	195238	253607	170090
3513	unkown494	0.0419656	0.142411	18	15	343624	0.904935	1	28	12	558246	0.162188	0.491249	23	14.5119	513512	503966	0.98141	1204789	769100	461264	1460962	104737	127546	209741	277254	546478	644862	560616	481030	461973	181955	191164	508314	511987
3515	unkown4945	0.0299489	0.115346	18	0	42764.6	0.585863	1	23.7736	17.9999	375032	0.0884832	0.330621	20.8868	18.3505	334907	53962.1	0.161126	403679	495281	386048	262907	326565	302999	245919	294308	315223	237026	343383	362517	362782	368356	347531	421462	342249
3517	unkown4949	0.0065055	0.0420944	18	0	90524.5	0.231762	1	24.0327	17.9999	847980	0.0113037	0.0781894	21.0163	18.3786	788043	90954.9	0.115419	799543	885096	959911	884629	651625	778388	715628	734670	755042	688895	738363	814478	990204	856821	759270	785627	799887
3519	unkown4951	0.0419656	0.142411	24	12	42991.7	0.709985	1	22.7907	12	546725	0.134477	0.431177	23.3953	12.008	489791	46300.8	0.0945317	421489	369957	452315	511692	514628	516504	308599	538779	583025	527042	549095	527738	449194	467615	512919	571677	488892
3529	unkown497	0.0065055	0.0420944	18	15	55979.9	0.999305	1	20	12	116317	0.0392386	0.188355	19	13.6167	84753.9	69610.4	0.821324	77986	146805	81386	237492	13028	43322	62810	16519	129891	100716	142677	91983	22908	69472	25724	82557	84079.8
3532	unkown4981	0.0419656	0.142411	24	0	132653	0.262492	1	24.7059	6.63e-05	472194	0.060679	0.252922	24.3529	3.27e-05	341305	149058	0.436729	518074	571366	346577	452764	271029	187544	318905	272652	317326	175095	124190	346895	523372	195116	341030	472443	339649
3544	unkown5014	0.00421867	0.0314483	24	21	67864.6	0.0847446	1	24.1644	6.63e-05	157818	0.00319483	0.03146	24.0822	22.5771	128030	68088.5	0.531816	156994	131121	185526	157632	47772	106155	173858	45713	91571	77883	50587	76922	186743	195724	197864	162604	127792
3547	unkown502	0.0419656	0.142411	18	0	100773	0.95863	1	20	12	344323	0.169493	0.502908	19	15.2	300934	142450	0.473357	400794	418640	342232	624799	78383	239225	260147	197849	386015	295717	284681	410879	350084	282594	168040	305891	315373
3551	unkown503	0.00980952	0.0546185	18	0	2.89762e+06	0.503412	1	26.8085	17.9999	4.80738e+06	0.031164	0.160889	22.4043	18.7235	4.94862e+06	2.62666e+06	0.530786	9689636	10221141	4727215	10144408	2113459	2691063	2538937	2669796	3648558	5497622	5186290	3682385	8198108	4660060	1838937	4532421	5.1275e+06
3556	unkown504	0.0419656	0.142411	18	15	444355	0.95675	1	20	12	895319	0.169239	0.502813	19	13.6167	622176	488253	0.78475	1025177	945481	317968	1205756	377191	207072	323199	171538	760772	1096646	1009118	714741	644894	297016	154064	628540	617448
3559	unkown505	0.0299489	0.115346	18	0	9.54178e+06	0.667083	1	28	12	1.69707e+07	0.0981561	0.354963	23	4.92857	1.70096e+07	1.39692e+07	0.821255	31778895	31216723	16442729	35975439	8279935	8886140	9094725	8209437	16603840	19756520	18488256	13034009	21795749	14183666	7369177	15646197	1.72976e+07
3571	unkown5078	0.00421867	0.0314483	24	21	78490.1	0.395723	1	26.0177	17.9999	367818	0.0123459	0.0836251	25.0088	19.5924	231509	109826	0.474394	241803	228011	160042	294037	203518	100058	219511	77317	106928	117052	207881	204760	631629	223507	308749	307390	227012
3573	unkown5081	0.0299489	0.115346	18	3	21158.2	0.616711	1	28	6	155740	0.0921943	0.340362	23	4.38095	171298	5424.06	0.0316646	158241	126171	85072	227783	102165	151392	180582	188821	55692	141017	143384	122610	248914	204417	363119	240152	171221
3576	unkown5087	0.0419656	0.142411	18	3	40178.9	0.197602	1	24.1644	6.63e-05	487563	0.0480334	0.216914	21.0822	1.75688	424645	108654	0.25587	361875	490944	485086	612350	344421	395187	276051	454818	391269	407538	252390	369899	556696	560002	475598	490429	432785
3584	unkown5096	0.0144977	0.0712252	24	0	212866	0.12449	1	24.0327	17.9999	1.18847e+06	0.0132064	0.0882938	24.0163	21.002	1.04039e+06	208444	0.200352	1195797	1182810	1164872	1202925	987941	854021	920238	782019	864003	774758	884608	1075765	1506683	971401	1090006	1185815	1.04023e+06
3594	unkown5117	0.00980952	0.0546185	24	21	37989.7	0.28375	1	23.9024	17.9999	141560	0.0191614	0.112817	23.9512	19.497	102617	53085.9	0.517319	111018	200892	116234	111306	60112	56644	110037	21767	74360	54674	74779	85589	235736	112866	104190	113450	102728
3596	unkown5124	0.000572095	0.00854353	18	0	88753.2	0.267242	1	20	17.9999	438291	0.00149613	0.0198457	19	18.05	382082	88248.4	0.230967	489504	469746	486760	523876	364381	129978	363595	324049	433356	378644	298689	404357	496351	423530	383228	450057	401256
3597	unkown5125	0.000987235	0.0119368	18	0	80139.2	0.0952992	1	20	17.9999	701924	0.000966356	0.0154002	19	18.05	644380	75135.8	0.116602	719653	771993	667243	748625	547208	528334	620980	523280	649941	622980	662883	700466	766063	642101	719038	680495	660705
3598	unkown5126	0.00421867	0.0314483	18	0	130272	0.619223	1	27.1385	12	935414	0.018149	0.108991	22.5692	4.9898	931583	183767	0.197263	1081571	1065730	1007118	1173471	794763	739254	883032	848737	936460	862603	968438	974154	824122	918385	980242	933331	936963
3599	unkown5127	0.0210199	0.0924874	24	21	90288.2	0.124115	1	23.7736	17.9999	495703	0.0181286	0.108991	23.8868	19.4933	430269	92451.3	0.214869	509267	425166	531392	487013	352517	307866	444061	314051	473914	325659	350749	387039	436648	479996	571413	494759	430719
3601	unkown5132	0.0144977	0.0712252	24	21	94586.5	0.128701	1	23.9024	17.9999	386679	0.0135911	0.0896876	23.9512	19.497	320144	97579.2	0.304798	371247	332041	360720	471068	230640	174454	361880	212384	284077	235174	226244	318914	445811	315609	408033	377267	320348
3620	unkown5161	0.00267199	0.0224826	18	12	316333	0.0733039	1	20	12	2.05326e+06	0.0018682	0.0228956	19	12.0333	1.65939e+06	441452	0.266032	1500079	1159699	1712122	1438472	1579548	1591618	1473084	1656275	2245385	2020284	2030643	1916713	1301078	1454219	1163166	1473526	1.60724e+06
3624	unkown517	0.0210199	0.0924874	18	15	145088	0.964686	1	20	12	372936	0.0993244	0.3571	19	13.6167	274420	171140	0.623642	354415	394930	224811	441676	73567	195286	151379	171007	555442	323828	414816	197660	386893	183274	102188	193024	272762
3625	unkown5170	0.0419656	0.142411	18	0	56047.6	0.321717	1	25.1282	17.9999	286951	0.0716229	0.284354	21.5641	18.5055	271631	47761.8	0.175833	329196	289457	339966	366914	236421	220344	279451	197026	296079	212372	217227	294473	267009	272875	272645	335277	276671
3627	unkown5175	0.0419656	0.142411	24	21	13618.9	0.257898	1	27.6489	6.63e-05	44263.5	0.059808	0.250629	25.8245	24.2105	49993.4	16666.3	0.333369	23447	62036	42175	49396	29801	39106	42173	47817	40342	50848	19904	47272	61885	72581	71090	81366	48827.4
3628	unkown5176	0.0419656	0.142411	24	0	56829.8	0.225399	1	24.5682	6.63e-05	307073	0.0535455	0.231756	24.2841	3.28e-05	244118	73305.9	0.300288	278366	229419	362653	357857	193043	171472	266422	231831	243462	154528	130954	227278	283366	236234	231673	296763	243458
3631	unkown5182	0.0144977	0.0712252	18	0	33598.9	0.330851	1	24.7059	17.9999	87762.4	0.0304096	0.157461	21.3529	18.455	75242.1	29837	0.396546	103124	86563	137923	115974	66964	24201	70113	45449	69066	60052	29357	98949	122562	78674	64896	84918	78674.1
3635	unkown5186	0.00164724	0.0165458	24	0	35692.6	0.105738	1	22.6735	4.99e-05	184642	0.00168175	0.0215361	23.3368	2.57e-05	151841	47970.3	0.315925	167848	189269	214090	167360	135153	151722	159652	117358	111217	70643	116086	147315	193296	157660	147522	201082	152955
3650	unkown5203	0.0065055	0.0420944	24	0	51508.5	0.117669	1	24.1644	6.63e-05	245443	0.0062579	0.0515962	24.0822	3.3e-05	200037	61620.2	0.308044	241818	234129	248423	257404	154074	180317	221255	119781	168588	138335	130289	197415	285278	187301	222762	210793	199873
3656	unkown5210	0.0210199	0.0924874	18	3	26152.9	0.47716	1	20	6.63e-05	190940	0.0561891	0.238873	19	1.58336	171868	35419.6	0.206086	213535	171361	240939	137927	174961	184255	177893	159532	164285	128095	135387	135456	217934	171453	242048	190940	177875
3664	unkown522	0.0419656	0.142411	18	15	360681	0.655129	1	20	12	1.26719e+06	0.126298	0.418006	19	13.6167	795541	565900	0.71134	919661	924421	443033	1256664	529220	479713	533694	620151	1694260	1121316	1038754	1214431	573000	546156	224538	521962	790061
3688	unkown5249	0.0065055	0.0420944	18	3	11053.8	0.140141	1	25.5652	6.63e-05	148492	0.00729367	0.0570094	21.7826	1.81525	142499	36184	0.253925	142304	177007	133391	141266	142878	145453	92689	126558	136584	109148	113897	127092	179064	165974	178061	197352	144295
3690	unkown5250	0.00980952	0.0546185	18	3	9532.51	0.546303	1	26.6465	6.05e-05	365594	0.0333809	0.168585	22.3233	1.8603	366650	60137.1	0.164018	402004	354915	346082	359375	345981	383193	341581	339201	343664	272310	373208	339032	460103	380149	378642	478914	368647
3694	unkown5257	0.0065055	0.0420944	18	0	49851.7	0.208332	1	24.5682	17.9999	210569	0.0103054	0.0731924	21.2841	18.439	184885	48729.1	0.263565	254840	209283	217299	278175	170834	77717	206241	144801	180530	158745	125192	184319	205501	180640	233910	222226	190641
3695	unkown5258	0.0144977	0.0712252	18	0	32772.5	0.135778	1	21.7778	17.9999	113564	0.0142331	0.0928959	19.8889	18.1638	92046.7	27260.5	0.29616	110133	111966	132390	124305	64759	63926	76083	63525	66566	112334	61363	109878	113825	123065	86217	131148	96967.7
3696	unkown526	0.000320124	0.0059414	18	12	182805	0.0614275	1	23.0287	12	661939	0.000232762	0.00676569	20.5144	12.183	417041	326664	0.78329	390059	204282	76509	255662	446793	478488	400019	650420	653138	815233	427311	752075	203636	274494	69627	105497	387703
3697	unkown5260	0.00164724	0.0165458	24	21	41581.8	0.0343109	1	24.7059	17.9999	140419	0.000609322	0.0116608	24.3529	19.5258	98457.6	42659.9	0.433282	96282	107386	119862	125804	56857	83663	75831	52074	66143	66390	49934	103301	142085	117565	152163	149864	97825.2
3702	unkown5267	0.000987235	0.0119368	18	3	114978	0.130885	1	23.52	5.09e-05	1.28002e+06	0.0012862	0.0188337	20.76	1.73002	1.18392e+06	221262	0.186889	1271552	1230024	1278582	1339913	1079246	1100680	1242487	1135569	1064797	867195	987895	1170344	1527166	1260932	1269247	1428415	1.20338e+06
3706	unkown5274	0.0419656	0.142411	18	0	47765.4	0.358851	1	20	17.9999	672256	0.078245	0.300327	19	18.05	634812	47377.7	0.0746326	624390	646179	728348	734654	489751	598467	582814	577897	607878	625497	699210	717586	747128	624344	627891	689661	645106
3710	unkown5278	0.0299489	0.115346	18	3	18843.7	0.721209	1	26.0177	6.63e-05	71326.7	0.104435	0.365686	22.0088	1.8341	71172.5	43747.9	0.614674	94084	69747	74170	47306	68776	79413	93580	38967	65745	34106	23119	47492	122213	63213	124000	122530	73028.8
3713	unkown5280	0.00980952	0.0546185	24	0	102712	0.105856	1	23.9024	6.63e-05	575709	0.00817225	0.061959	23.9512	3.32e-05	494821	129298	0.261302	581754	596120	587418	537547	447830	352249	544296	393319	471003	374924	288745	492546	617289	526861	537392	571165	495029
3721	unkown5298	0.0210199	0.0924874	24	21	70071.1	0.291047	1	25.2722	17.9999	514914	0.0372973	0.182244	24.6361	19.5517	439746	63763.6	0.145001	370614	406676	505857	485779	348787	362650	437141	366410	391306	383453	366160	524588	566274	493430	448698	551256	438067
3723	unkown530	0.000987235	0.0119368	18	0	621633	0.225125	1	26.4865	17.9999	1.5209e+06	0.00209177	0.0245385	22.2432	18.6798	1.5126e+06	805446	0.532492	2860703	2906692	1540054	3412889	860264	836540	750549	1170509	1073789	1149214	1352451	1173509	2355610	1286280	866337	1575371	1.57317e+06
3732	unkown5310	0.00421867	0.0314483	18	0	75184.9	0.0557708	1	23.9024	17.9999	993556	0.00220097	0.0251939	20.9512	18.3644	912372	94456.6	0.103529	1029466	1074321	887499	989827	892737	850853	797695	844973	857698	806166	878547	915179	1010921	971165	985689	1006452	924949
3739	unkown532	0.0299489	0.115346	18	15	782334	0.937656	1	20	12	1.43901e+06	0.128408	0.421848	19	13.6167	1.18757e+06	774790	0.652414	1924766	2151772	950946	2405757	310863	492277	760607	395827	1251391	1745195	1642289	1117156	1356564	1008603	433273	933835	1.18007e+06
3741	unkown5323	0.000987235	0.0119368	24	18	44212.6	0.0453316	1	25.2722	17.9999	242146	0.000492924	0.0105655	24.6361	18.012	182760	51722	0.283006	148786	181596	178430	172172	118818	161429	152426	88058	178250	136139	194024	229344	256687	233046	238901	239952	181754
3746	unkown533	0.00267199	0.0224826	18	3	295704	0.0189976	1	24.0327	6.63e-05	1.04328e+06	0.00055271	0.0111583	21.0163	1.75139	621964	583888	0.938781	1219649	1160358	847493	945623	240155	318930	228416	415512	179431	240411	321456	207246	1441795	1021079	710808	1177122	667218
3747	unkown5330	0.0299489	0.115346	18	3	367755	0.420303	1	26.3284	6.63e-05	1.08209e+07	0.0676591	0.273808	22.1642	1.84704	1.08024e+07	1.28248e+06	0.118722	10801796	11135123	9671779	11675108	11611053	9928342	10819259	9067784	9259459	10503477	10153360	10434974	13267872	11510058	11882421	11890875	1.08508e+07
3748	unkown5331	0.00980952	0.0546185	24	0	74506.6	0.0970041	1	24.2975	6.63e-05	225324	0.00757198	0.0585757	24.1488	3.3e-05	152631	90081.5	0.59019	205311	191547	232582	271858	145743	61638	167468	77847	123472	64671	39035	124385	241121	154102	216750	117668	152200
3749	unkown5333	0.0210199	0.0924874	18	3	28392.5	0.249207	1	24.9858	6.63e-05	193020	0.0327486	0.1667	21.4929	1.79111	170567	72789.1	0.426749	182455	187049	164976	237600	192963	96145	165166	75041	149853	69767	106074	187697	277808	189702	316052	200091	174902
3759	unkown5349	0.0299489	0.115346	24	0	73929.1	0.289346	1	22.9091	7.42e-05	260401	0.0498133	0.221438	23.4545	3.8e-05	221465	92522.8	0.417775	199170	211360	323919	307158	211492	186140	279572	112342	202333	87865	108729	196018	300532	245177	292666	306922	223212
3763	unkown5356	0.000572095	0.00854353	18	3	89920.3	0.107876	1	24.5682	6.63e-05	1.58483e+06	0.000659918	0.0120985	21.2841	1.77371	1.51235e+06	169341	0.111972	1556742	1622817	1610672	1549107	1521923	1271655	1539959	1361748	1405609	1337304	1419976	1475107	1628149	1567304	1839203	1672346	1.52373e+06
3765	unkown5358	0.0299489	0.115346	24	21	101926	0.402928	1	25.8651	6.63e-05	990979	0.0653716	0.267294	24.9326	23.3743	986068	111632	0.113209	1097565	957988	921824	986540	1108690	913565	870479	841777	943012	830067	894413	927118	1087562	1013412	1186292	1129131	981840
3767	unkown536	0.0065055	0.0420944	18	15	8.12631e+06	0.813789	1	20	12	3.00563e+07	0.0330413	0.167811	19	13.6167	2.09723e+07	1.19097e+07	0.56788	25436702	25426437	15794579	30770677	13939236	15454877	16528535	15002053	35058871	31793516	25846474	27526512	17167016	14796369	8584702	14584185	2.08569e+07
3771	unkown537	0.00980952	0.0546185	24	3	324784	0.0789109	1	22.2166	6.3e-05	1.66978e+06	0.00631945	0.0519139	23.1083	1.4443	1.26e+06	562077	0.446095	1553682	1741644	1233364	2150438	1411605	1452045	1253017	1228204	716063	873834	799904	723058	1402922	1267451	879935	1646360	1.27085e+06
3789	unkown5395	0.0210199	0.0924874	18	3	21228.8	0.48745	1	20	5.46e-05	136848	0.0571822	0.241472	19	1.58336	119662	31730.4	0.265166	128648	146640	107652	164453	113386	124286	136495	99528	68323	95447	90813	119238	205144	141043	147793	111809	125044
3790	unkown5396	0.0299489	0.115346	18	3	32331.4	0.700246	1	20	6.63e-05	197789	0.102018	0.360865	19	1.58336	177104	47790.5	0.269844	185566	226900	190076	188616	170554	175566	270956	106210	147742	114677	102709	177787	265119	180036	197323	263514	185209
3792	unkown5400	0.0419656	0.142411	18	0	10703.1	0.566134	1	20	17.9999	88442.5	0.11261	0.387391	19	18.05	83684.2	9267.62	0.110745	112150	82420	93165	97791	76337	61744	76557	84142	95911	78275	84284	74619	95280	84062	85812	88616	85697.8
3795	unkown5403	0.0299489	0.115346	18	15	29766.7	0.708388	1	20	12	316334	0.102959	0.362204	19	13.6167	271596	50414.9	0.185625	267271	276477	299965	243124	242315	267422	213627	262351	334418	309034	348440	273444	179839	258483	264786	296724	271108
3797	unkown5405	0.0144977	0.0712252	18	0	25933.8	0.1854	1	24.4321	17.9999	97218.1	0.0185975	0.110652	21.2161	18.4233	84760.3	21654.5	0.25548	102038	108001	116847	107483	61672	69397	76010	71546	89990	60971	41198	104130	110409	83601	102009	92854	87384.8
3810	unkown5425	0.0144977	0.0712252	18	3	91744.5	0.391693	1	20	6.36e-05	1.21455e+06	0.0350432	0.17425	19	1.58336	1.14336e+06	128267	0.112184	1250892	1199202	1336888	1071217	1086186	1224121	1119179	1159743	1189082	1018368	1065270	858003	1342019	1219643	1289176	1212822	1.16511e+06
3818	unkown5434	0.0144977	0.0712252	24	18	12707.9	0.553472	1	21.253	18	306707	0.0467428	0.213155	22.6265	18.0665	283670	29007.4	0.102258	364631	271911	280502	270516	262852	268332	226995	260726	284869	284757	290199	269727	332502	274035	332223	288067	285178
3819	unkown5435	0.000572095	0.00854353	24	21	150880	0.0498481	1	24.0327	17.9999	1.22361e+06	0.000326956	0.0081499	24.0163	19.501	1.0861e+06	163218	0.15028	1290397	1153485	1142794	1066593	872655	1033617	990225	890821	1055655	953894	1026979	1004154	1328864	1120806	1263996	1180794	1.08598e+06
3820	unkown5436	0.0299489	0.115346	18	3	10332.1	0.350241	1	26.3284	6.63e-05	438886	0.0582935	0.245475	22.1642	1.84704	437597	60820.7	0.138988	515379	405713	400776	433676	394491	427516	448128	389627	379657	422239	365940	448301	529443	492685	519737	464993	439894
3821	unkown5437	0.00980952	0.0546185	24	18	12494.6	0.146522	1	26.4865	17.9999	101128	0.0108445	0.0757098	25.2432	18.0437	83719.5	13422.1	0.160322	83218	77357	94227	56846	62066	71042	71145	77230	76682	87210	75696	94618	113065	89023	97189	105236	83240.6
3823	unkown5439	0.0299489	0.115346	18	3	11145.9	0.210895	1	24.0327	6.63e-05	131189	0.0383048	0.185758	21.0163	1.75139	117609	19904.8	0.169245	147429	121797	123589	131942	84971	118632	123393	102383	121686	106860	91965	97120	154131	117554	129952	133028	119152
3830	unkown5449	0.0299489	0.115346	18	0	22120.4	0.195039	1	24.0327	17.9999	176756	0.0358815	0.177025	21.0163	18.3786	157214	22459.5	0.14286	180524	185565	157980	183905	139420	137566	177652	118028	154457	154107	113020	152962	185297	169980	184299	167449	160138
3831	unkown5450	0.0299489	0.115346	18	0	21876.3	0.877338	1	20	17.9999	88646.7	0.121895	0.408125	19	18.05	85033.5	14279.4	0.167927	105383	123736	109761	92090	40320	79094	82728	71663	120006	104722	66413	59674	90056	86860	86432	91239	88136.1
3833	unkown5452	0.0419656	0.142411	18	0	45232.2	0.440285	1	23.7736	17.9999	355933	0.0922222	0.340362	20.8868	18.3505	325858	44097.8	0.135328	393183	368551	336517	384694	226242	325162	335417	275930	379699	330863	258877	270867	326757	329653	382850	384473	331858
3850	unkown5473	0.00980952	0.0546185	18	3	140477	0.142452	1	24.0327	6.63e-05	2.00137e+06	0.0105826	0.0744582	21.0163	1.75139	1.84161e+06	263389	0.143021	2051376	1836907	1928871	2188314	1689920	1724616	1993853	1436698	1621604	1731410	1637842	1685800	2272340	2011417	2129219	1852213	1862025
3854	unkown5477	0.000572095	0.00854353	18	0	28432.6	0.0652276	1	20	18	173546	0.000417797	0.00951649	19	18.05	154405	25088.1	0.162482	191069	185927	186490	167389	119877	142131	127656	127862	168197	161545	148868	136498	163820	181479	188328	160558	159856
3856	unkown5479	0.0299489	0.115346	18	6	16081	0.99889	1	20	6	48461.8	0.134901	0.431186	19	6.01667	40093.6	10229.7	0.255145	42205	28130	11189	29945	53420	54887	44881	40659	12095	24644	22727	30090	77862	68475	39132	41323	38854
3860	unkown5485	0.0419656	0.142411	18	12	6899.24	0.432813	1	24.7059	12	109514	0.0909681	0.337946	21.3529	12.3034	98567.7	16853.9	0.170988	76608	109479	92988	92053	98095	103760	89428	125968	99046	118081	119375	101553	96658	77916	74674	82726	97400.5
3863	unkown5488	0.00980952	0.0546185	18	6	33601.5	0.467008	1	20	6.00001	435824	0.0292542	0.154131	19	6.01667	415915	17240.6	0.0414522	413125	426769	390673	409480	431812	463337	438752	409397	346866	382221	380415	343682	473036	427323	473782	410544	413826
3873	unkown55	2.22e-07	6.26e-05	18	6	3.05913e+06	0.0802955	1	20	6	6.99956e+06	3.36e-07	0.000177483	19	6.01667	3.90896e+06	3.13318e+06	0.801539	2324858	2351161	2303107	2082410	7491445	7821524	5360652	7324600	1022805	1216083	1510754	1045959	3993855	3771555	3174680	3672986	3.52928e+06
3880	unkown5508	0.0144977	0.0712252	18	9	10534.1	0.306418	1	25.8651	5.99999	29820.5	0.0285047	0.150888	21.9326	8.02701	23930.7	8133.11	0.339861	9831	16583	11277	11726	26151	31970	40162	20999	18585	26121	31504	35742	24594	28695	25206	11695	23177.6
3882	unkown5510	0.0419656	0.142411	24	21	71531.3	0.240908	1	24.0327	17.9999	431737	0.056557	0.240181	24.0163	19.501	383375	76376.7	0.199222	381629	417281	428284	523094	356375	268937	427170	272153	308471	308230	333340	381239	510559	384452	434722	397216	383322
3891	unkown5522	0.0419656	0.142411	24	15	12711	0.258544	1	28	12	48070	0.0599307	0.250629	26	13.6964	38211.3	9408.03	0.246211	29736	37216	8580	14345	45153	28105	30174	40581	29327	58916	49054	54983	36902	65104	42776	46162	38569.6
3894	unkown5525	0.0299489	0.115346	24	21	186166	0.195858	1	24.5682	6.63e-05	1.39695e+06	0.0360076	0.177249	24.2841	22.7664	1.32102e+06	200738	0.151957	1340837	1476265	1338213	1432497	1294601	1045682	1406629	1011808	1078785	1185192	1208004	1272042	1673788	1375970	1329505	1628034	1.31862e+06
3900	unkown5532	0.000987235	0.0119368	24	21	14540.6	0.116895	1	24.7059	17.9999	129931	0.00116177	0.0174402	24.3529	19.5258	113052	15634.1	0.13829	119353	123564	114660	105821	95784	83744	116039	97893	121948	103056	98065	105478	123675	130346	121267	144436	112821
3911	unkown5551	0.0419656	0.142411	24	21	15999.4	0.289521	1	24.1644	17.9999	121353	0.0657363	0.268418	24.0822	19.5053	106395	17179.2	0.161466	97246	121978	134548	102332	106650	86160	80623	95380	110831	100467	103395	76339	107801	136350	114431	126831	106335
3916	unkown5558	0.0419656	0.142411	18	6	11941.6	0.999975	1	20	6	101862	0.175031	0.508227	19	6.01667	94183.8	9593	0.101854	88125	92568	93887	56236	102216	105915	93865	105454	72658	85871	90642	74113	104017	126700	89622	106452	93021.3
3918	unkown556	0.000171384	0.00408964	24	9	163866	0.0655746	1	22.1053	6.00002	416766	0.000139314	0.00494728	23.0526	7.45095	195897	230063	1.17441	53331	59329	16864	46874	570272	379315	251708	465769	144449	202468	146257	519419	23371	41986	21449	43344	186638
3931	unkown5573	0.0065055	0.0420944	18	0	32715.9	0.0760807	1	23.52	17.9999	170682	0.00426199	0.0386752	20.76	18.3238	149005	28593.1	0.191894	179705	175408	181231	169473	130673	131103	123550	117452	173191	133616	121382	129430	173888	142801	177041	188999	153059
3943	unkown5586	0.0210199	0.0924874	18	0	89093.7	0.292603	1	23.9024	17.9999	644820	0.0374639	0.18286	20.9512	18.3644	568381	89137.5	0.156827	697326	648602	588301	648350	521905	416605	631275	439550	591094	519243	455897	546568	786677	552503	597522	642580	580250
3944	unkown5588	0.0065055	0.0420944	24	21	8984.5	0.11708	1	24.8451	17.9999	45824.4	0.00623041	0.0515581	24.4225	19.5318	35104.6	9459.25	0.269459	34920	29284	44007	36178	25705	25925	19758	31652	41794	28191	21584	36701	54787	43036	42555	42920	34937.3
3948	unkown5598	0.00980952	0.0546185	18	0	53239.7	0.238641	1	20	18	246336	0.0165206	0.103339	19	18.05	203058	55128.3	0.27149	324937	295986	177963	258011	117940	136756	212477	128096	150524	213854	220790	217902	269359	249265	205553	261168	215036
3957	unkown5613	0.0419656	0.142411	18	0	40613.2	0.509444	1	20	17.9999	199061	0.103589	0.363613	19	18.05	176073	34452.2	0.195669	247740	234916	177289	214505	129890	133305	209358	108637	134028	187583	156361	207088	194275	189298	170053	242620	183559
3958	unkown5614	0.00980952	0.0546185	18	0	62787.9	0.451375	1	24.0327	18	362065	0.0284257	0.150675	21.0163	18.3786	330586	70426.9	0.213036	525810	392258	292127	443949	250552	275367	306104	231134	257692	325601	315931	371322	383110	348127	308360	408663	339757
3960	unkown5617	0.0065055	0.0420944	18	0	70147.8	0.274694	1	24.5682	17.9999	307309	0.0130939	0.0877465	21.2841	18.439	274750	72348	0.263323	457504	358225	252241	370112	219299	189707	262986	193474	184254	270802	236758	308147	326779	283478	278059	340923	283297
3961	unkown5618	0.00980952	0.0546185	18	0	65810.8	0.273569	1	23.3952	17.9999	291208	0.018572	0.110647	20.6976	18.311	252454	66989.5	0.265353	404241	303841	277077	321740	149289	190394	264351	165510	175786	261840	236589	278753	307605	286694	223895	346640	262140
3964	unkown5622	0.0144977	0.0712252	18	0	20241.3	0.419963	1	20	17.9999	80380.5	0.0371482	0.181712	19	18.05	71378.7	16689	0.23381	83529	106258	88020	97149	52888	43727	80172	41406	84762	65901	46559	88185	73747	72708	81882	93185	75004.9
4002	unkown5672	0.000987235	0.0119368	18	0	510732	0.225238	1	20	17.9999	3.24829e+06	0.0020927	0.0245385	19	18.05	2.94225e+06	460159	0.156397	3575793	3599548	3131960	3729481	2729060	2281555	3084852	1969074	2377459	3002081	2965197	3236470	3218834	3256294	3390074	3127960	3.04223e+06
4005	unkown5677	0.00980952	0.0546185	18	0	545027	0.252097	1	23.52	17.9999	3.02163e+06	0.0173165	0.105847	20.76	18.3238	2.74181e+06	511424	0.186528	3426434	3323971	2902454	3621645	2336625	2098946	2966856	1723647	2077554	2864713	2693333	2906404	2839147	3139216	3198201	2909976	2.81432e+06
4007	unkown5680	0.0299489	0.115346	18	0	269082	0.479982	1	20	17.9999	1.97737e+06	0.0753573	0.292732	19	18.05	1.83169e+06	250821	0.136935	2222463	2165370	1857429	2378772	1690649	1446431	1979769	1147136	1517818	2033537	1813409	2016696	2010633	1916749	2092304	1889796	1.88619e+06
4008	unkown5682	0.0144977	0.0712252	18	0	1.26779e+06	0.391059	1	20	17.9999	8.36433e+06	0.0349957	0.17425	19	18.05	7.66858e+06	1.07144e+06	0.139718	8879553	8939106	8217831	9951860	7340584	5964110	8168438	5021522	6188857	8191669	8025168	8076060	8037615	8000658	9296194	8122860	7.90138e+06
4026	unkown5713	0.0065055	0.0420944	18	15	18239.8	0.999896	1	20	12	43314.5	0.0392579	0.188355	19	13.6167	33007.6	24969.5	0.756476	19345	132108	25267	28356	7930	16408	14122	10038	26412	27617	54567	64662	21335	28419	24548	23119	32765.8
4039	unkown5730	0.0210199	0.0924874	24	21	22837.4	0.331842	1	23.6461	17.9999	138664	0.0416102	0.197046	23.8231	19.4899	117479	27581.5	0.234779	174732	99056	130626	128435	94055	98536	73678	108366	85362	128557	100913	106052	129542	139743	110504	174868	117689
4077	unkown5782	0.0419656	0.142411	24	0	27431.5	0.267419	1	20	6.63e-05	186537	0.0616091	0.255854	22	3.65e-05	162269	35545.5	0.219053	212655	187541	185452	160500	177563	173996	214653	110439	157318	116616	105537	106940	159862	184505	181364	205948	165056
4086	unkown5792	0.0419656	0.142411	18	3	14027.2	0.767891	1	20	6.01e-05	335133	0.142918	0.448316	19	1.58336	320330	34304.4	0.107091	325272	359273	331257	324730	357711	307598	317165	291555	303191	311284	229416	327593	353006	325963	331940	421416	326148
4090	unkown5797	0.0419656	0.142411	24	21	16299.9	0.421248	1	24.0327	17.9999	107031	0.0890161	0.332062	24.0163	19.501	90127.7	19302.9	0.214173	90831	88489	122293	93068	69475	78014	78885	68143	107761	88797	51196	76750	81703	112378	99502	134543	90114.2
4122	unkown5836	0.0144977	0.0712252	24	0	25049.3	0.346465	1	24.9858	6.63e-05	333175	0.0316132	0.162202	24.4929	3.25e-05	304045	30991.7	0.101931	367553	330337	327364	307449	262114	314192	302728	271904	251954	301589	279126	299065	272717	323969	317309	327777	303572
4137	unkown5852	0.0210199	0.0924874	18	6	18461.3	0.919715	1	20	6	76584	0.0956171	0.347986	19	6.01667	63894.7	15416	0.241272	61122	40932	42465	49998	80219	69533	78086	78498	51971	51925	68553	49188	58200	73894	74544	63298	62026.6
4138	unkown5853	0.0299489	0.115346	18	6	19342.9	0.915448	1	20	6.00001	153238	0.126024	0.417917	19	6.01667	132757	23793.4	0.179226	122225	121474	101066	104164	155945	138035	191788	127186	149580	112786	120667	100654	136494	144277	128484	123147	129873
4143	unkown5858	0.0419656	0.142411	18	3	25175.5	0.679733	1	20	6	304874	0.129989	0.423286	19	4.43333	296813	35468.2	0.119497	284676	292355	273614	326852	289154	295285	340437	294622	285427	221067	268026	251998	317714	333045	359850	307335	296341
4144	unkown5859	0.00267199	0.0224826	18	9	26528.2	0.330452	1	20	6	208374	0.00709218	0.0558215	19	7.6	172643	30092.1	0.174303	164422	137086	126114	130834	231092	243463	180955	177985	175888	167065	155460	133642	166870	147978	166604	162176	166727
4157	unkown5871	0.0299489	0.115346	24	21	13200.6	0.423458	1	24.0327	17.9999	105687	0.0680721	0.274602	24.0163	19.501	97879.3	14844.2	0.151658	114255	103934	106303	113475	91791	92801	72983	87935	96587	95286	70335	97469	98685	80873	115674	127517	97868.9
4170	unkown5885	0.00980952	0.0546185	18	0	16713.9	0.046115	1	23.9024	17.9999	96198.9	0.00393605	0.0370222	20.9512	18.3644	82278.5	16306.3	0.198184	93747	97570	92986	102654	66780	77424	69295	71048	71729	62496	70498	90174	109988	95611	89881	89316	84449.8
4171	unkown5886	0.0065055	0.0420944	18	3	9378.89	0.178312	1	20	7.24e-05	62905.4	0.00900086	0.066699	19	1.58337	54022.5	14862.9	0.275125	76843	60326	56164	58289	47248	63562	52770	45729	34232	42761	38695	52958	73894	69046	76796	55377	56543.1
4174	unkown5889	0.0299489	0.115346	24	0	13039.8	0.274596	1	24.4321	6.63e-05	88709.4	0.0477043	0.216228	24.2161	3.29e-05	73905.3	17133	0.231824	93922	85775	92302	82839	70873	69081	64874	69408	48346	63039	41728	87937	86644	84501	81356	57967	73787
4176	unkown5890	0.0210199	0.0924874	18	0	19056.2	0.396824	1	25.1282	17.9999	78878.4	0.0482667	0.217395	21.5641	18.5055	71427.2	19676.5	0.275476	92884	80040	87483	122160	49760	42296	69458	69095	69922	54748	57068	65627	82633	45283	110884	76714	73503.4
4194	unkown5907	0.0210199	0.0924874	18	3	7327.75	0.387088	1	25.5652	4.89e-05	73933	0.0472846	0.215083	21.7826	1.81524	71006	19502.8	0.274664	63279	77868	89630	64955	77016	52399	58947	74414	45615	65240	53225	71523	95723	76046	85418	100289	71974.2
4196	unkown5909	0.0299489	0.115346	18	3	7503.11	0.0826758	1	24.0327	6.63e-05	111108	0.0173351	0.105847	21.0163	1.75139	99327.7	18285.3	0.184091	93825	107030	119859	123719	95330	96316	94498	74507	97209	77755	88158	85885	109355	110575	121250	116648	100745
4197	unkown5910	0.0144977	0.0712252	18	3	11479.7	0.258762	1	23.9024	6.63e-05	123924	0.0247056	0.135715	20.9512	1.74596	111974	25276.8	0.225738	120336	129913	101808	143640	104871	100529	111299	101133	71314	92649	109322	103963	159680	139237	114033	120249	113998
4198	unkown5911	0.00980952	0.0546185	18	3	12860.5	0.504023	1	24.8451	6.45e-05	120089	0.0311958	0.160889	21.4225	1.78524	114894	27201.7	0.236754	112777	105783	137402	124394	131171	118029	109963	86479	79517	85165	108218	111930	152218	124942	126192	151153	116583
4204	unkown5917	0.000987235	0.0119368	18	3	6264.79	0.170999	1	25.2722	6.63e-05	56162.7	0.00163527	0.0211708	21.6361	1.80304	52479.1	18246.2	0.347686	61013	53823	58150	51665	57149	42069	40478	47006	48962	41018	44621	29948	84304	76058	60853	58478	53474.7
4205	unkown5918	0.0419656	0.142411	24	9	24859.8	0.252037	1	24.0327	6	69449	0.058692	0.246693	24.0163	7.50102	51748.4	24708.9	0.477482	56122	34493	18228	38575	64676	66337	70790	75993	32873	89879	89624	56975	12531	51560	17202	52392	51765.6
4207	unkown5921	0.0065055	0.0420944	18	6	26806.1	0.737034	1	20	6	207878	0.0303999	0.157461	19	6.01667	184325	23075.2	0.125187	155280	162628	197152	175765	250645	203497	197407	179962	185073	121656	145703	154683	207048	189337	201720	176906	181529
4220	unkown5940	0.0299489	0.115346	24	21	80468.6	0.255748	1	24.0327	6.63e-05	588921	0.0449745	0.208249	24.0163	22.5154	546626	83445.2	0.152655	693503	535846	568931	557405	606100	521725	437906	442618	537858	449330	496991	443505	629113	558152	668746	597362	546568
4224	unkown5946	0.0299489	0.115346	24	21	27303	0.171307	1	25.7143	6.63e-05	254132	0.0321811	0.164368	24.8571	23.3036	252069	31215.5	0.123837	228079	246783	269151	272517	221167	247418	249510	210077	230587	234830	252596	208334	261400	278276	299698	305209	250977
4226	unkown5948	0.0299489	0.115346	18	3	16321.8	0.516843	1	25.7143	6.63e-05	278896	0.0799993	0.30576	21.8571	1.82146	273368	42640.6	0.155982	327867	270321	236691	280706	268748	287701	272081	200277	254115	246452	250374	243310	282179	346059	287299	351925	275382
4234	unkown5957	0.0065055	0.0420944	18	9	31884	0.330905	1	20	6.00001	94548	0.0153725	0.0980623	19	7.6	65904.5	27333.9	0.414751	31518	48393	33053	25488	110144	76942	94867	96239	92969	68164	41016	32500	35785	41043	76384	63995	60531.2
4251	unkown5979	0.0419656	0.142411	18	3	109323	0.959467	1	20	6	1.31812e+06	0.169606	0.502908	19	4.43333	1.28324e+06	139110	0.108406	1405176	1242257	1264877	1238862	1717712	1354870	1007779	1192126	1195170	1173001	998214	1113492	1243351	1435316	1394900	1525098	1.28139e+06
4253	unkown5981	0.0419656	0.142411	18	6	27834.4	0.963074	1	20	6	196020	0.170092	0.503347	19	6.01667	168681	31613.3	0.187415	154869	131074	132071	143953	225953	185101	157705	215321	152894	161481	134506	130054	147990	159959	206773	197900	164850
4255	unkown5983	0.0065055	0.0420944	18	6	117854	0.846111	1	20	6	945285	0.0341393	0.171266	19	6.01667	843872	104038	0.123287	917398	692943	732474	759939	1152355	953717	788921	886147	755484	716354	680616	618586	863958	948193	937276	895875	831265
4257	unkown5985	0.0144977	0.0712252	18	6	77521.4	0.839442	1	20	6	388566	0.0658249	0.268418	19	6.01667	328041	68403.6	0.208522	346169	259724	238176	236266	431017	394902	353508	374836	254804	284867	267870	265072	360435	381454	321684	345245	319752
4273	unkown600	0.0144977	0.0712252	18	0	144975	0.330792	1	24.4321	17.9999	247290	0.0304051	0.157461	21.2161	18.4233	193658	118935	0.614148	293502	303480	384006	350200	134938	75690	62283	101442	290637	52346	163034	128449	226588	230567	82599	449409	208073
4274	unkown6000	0.0065055	0.0420944	18	9	33755	0.370985	1	20	6	121202	0.0169585	0.104931	19	7.6	88046.6	30742.6	0.349163	75980	62942	21546	35776	128684	133611	123959	98554	83981	80465	73884	71696	85078	106133	70856	58908	82003.3
4281	unkown6009	0.0144977	0.0712252	18	6	49490.8	0.45079	1	20	6	470997	0.039412	0.188645	19	6.01667	416883	44972.4	0.107878	513543	398368	379115	377478	579375	465241	448561	390812	378026	356937	332008	270329	378281	411682	432574	470603	411433
4284	unkown6011	0.00267199	0.0224826	18	6	31459.2	0.447592	1	20	6	152476	0.00924337	0.067705	19	6.01667	122593	28239.8	0.230354	133444	114585	96170	104477	177344	159662	168288	104612	89287	91258	94021	67677	95986	112827	133898	163201	119171
4293	unkown6023	0.00980952	0.0546185	18	9	14983.4	0.312621	1	20	6	78911.5	0.0208139	0.120193	19	7.6	61546.2	14769.3	0.23997	43790	55071	33205	42133	70163	90473	82032	72978	64597	48613	53950	49873	49028	62266	55168	64946	58642.9
4299	unkown607	0.0210199	0.0924874	18	15	285454	0.889236	1	20	12	1.1663e+06	0.0930783	0.342122	19	13.6167	802942	469955	0.585292	881429	965560	785343	1169626	540455	544864	694706	640034	1506172	1181035	1031631	946352	428909	529340	325423	603363	798390
4301	unkown61	0.00164724	0.0165458	18	6	310520	0.195721	1	20	6	1201349	0.0029144	0.0296035	19	6.01667	772232	453144	0.586797	634740	473727	400547	462038	1531511	1127653	1318100	828132	505747	535346	464402	383146	935251	716353	565491	594942	717320
4304	unkown618	0.0065055	0.0420944	18	0	4.91892e+06	0.353483	1	28	12	5135169	0.0162696	0.102634	23	4.92858	6.54011e+06	7.74105e+06	1.18363	14042782	14901141	7703566	21531691	1404388	2981072	2234473	3194023	2995197	6188041	7088642	4268796	8233659	4273869	1339175	4814922	6.69971e+06
4308	unkown63	0.0419656	0.142411	24	15	80775.8	0.210186	1	20.5594	12	829728	0.0505477	0.223446	22.2797	13.4645	734656	112999	0.153812	710428	602692	601638	788547	720108	664790	642914	663167	923360	856948	838908	699695	693314	771610	749974	781928	731876
4310	unkown632	0.0144977	0.0712252	24	9	232730	0.10843	1	24.0327	12	640066	0.0117198	0.0802213	24.0163	10.499	471441	236399	0.50144	542181	235937	293801	263463	617766	724227	721757	408688	474257	906577	591556	587872	261550	262921	272435	380706	471606
4311	unkown64	0.000171384	0.00408964	18	6	4.31215e+06	0.293746	1	20	5.99998	1.42772e+07	0.000548574	0.0111583	19	6.01666	9.82738e+06	4.5566e+06	0.463664	9279665	7833460	5686057	5965213	14982617	16293357	15776656	10056345	4375701	6400726	6129067	4025955	12625837	9196956	9659625	10116131	9.27521e+06
4314	unkown66	0.0065055	0.0420944	18	9	461994	0.0764577	1	20	5.99998	2.10571e+06	0.00428065	0.0387277	19	7.59999	1.48533e+06	483373	0.325432	1102928	931006	1009697	975231	2324723	2139554	1863919	2094653	1115516	1267621	1417918	935946	1284183	1207626	1064710	1509701	1.39031e+06
4317	unkown672	0.00421867	0.0314483	18	12	174438	0.142099	1	23.3952	12	1.24982e+06	0.00504722	0.0435238	20.6976	12.2074	989161	354623	0.358509	913704	596950	668659	973195	1177476	1165797	1030764	960220	1545466	1149523	1223230	1081066	628587	1078323	521535	626913	958838
4318	unkown674	0.000987235	0.0119368	18	0	577727	0.329325	1	20	17.9999	1.53708e+06	0.00293627	0.0297586	19	18.05	1.34998e+06	549473	0.407022	2725659	1792477	1538469	2697442	573611	769102	986940	807101	1432798	1570493	1201950	1265563	1541695	1640768	1125695	1840175	1.46937e+06
4324	unkown69	0.000320124	0.0059414	18	6	2.53688e+06	0.298101	1	20	6.00001	9.65847e+06	0.000978831	0.0155441	19	6.01667	6.60544e+06	3.19345e+06	0.483458	6010226	4598038	3804149	4119926	11104184	9359719	11626670	6543289	4302676	4876343	3512618	2917410	7247920	6007688	7163790	6300738	6.21846e+06
4325	unkown692	0.0419656	0.142411	24	18	428135	0.162719	1	23.3952	12	2.11588e+06	0.0408803	0.19387	23.6976	14.9642	1.72418e+06	472243	0.273894	1361610	1343866	1903754	837453	1297170	1763398	1201622	1539747	2645708	1998150	1901801	1917870	1670245	1966052	2241347	1998230	1.72425e+06
4328	unkown70	0.000987235	0.0119368	18	9	270686	0.193562	1	20	6	1302991	0.00182736	0.0225175	19	7.6	975559	281239	0.288285	768547	600415	701464	544829	1588108	1298164	1137444	1188248	964128	884082	906501	632373	916586	848895	835841	908752	920274
4336	unkown722	0.0299489	0.115346	24	0	2.02835e+06	0.320775	1	20	6.6e-05	1.59864e+07	0.0542335	0.233151	22	3.63e-05	1.4393e+07	2.39046e+06	0.166085	17085846	15313810	13227346	18318604	16289189	14454172	14644923	12774066	14135381	11915163	11451020	9979071	17699470	16965001	12606555	16426812	1.45804e+07
4341	unkown730	0.0210199	0.0924874	18	15	325858	0.645613	1	20	12	1.4836e+06	0.0719226	0.284786	19	13.6167	1.23274e+06	422446	0.342688	1473856	1439330	999871	1605009	1037873	1005862	665957	816509	1963767	1328381	1263780	1378486	1211189	1368333	1055670	1044536	1.22865e+06
4342	unkown731	0.0419656	0.142411	18	15	86398	0.890481	1	20	12	387410	0.160199	0.485877	19	13.6167	259733	152519	0.587215	236191	320863	146413	420024	127859	175963	320286	130628	399691	458203	441847	249900	320997	132399	71637	179190	258256
4343	unkown736	0.00164724	0.0165458	18	9	1.22607e+06	0.0212106	1	24.1644	12	3.6828e+06	0.00039348	0.00914741	21.0822	10.5052	2.87377e+06	1.16076e+06	0.403915	1874503	1576517	1684777	1609108	3733758	3952660	3421103	2795463	3402674	4536364	3375858	3416298	2282540	2177835	1565155	2315403	2732501
4353	unkown750	0.00164724	0.0165458	18	6	492025	0.146431	1	20	6.00001	1.68936e+06	0.00225043	0.0253167	19	6.01667	1.29823e+06	325630	0.250826	1051000	1228782	1618053	1217423	2018713	1878221	1482688	1377800	471524	694466	692515	469159	1426145	1060546	1674528	1778761	1.25877e+06
4362	unkown768	0.0299489	0.115346	24	0	655655	0.247372	1	20	6.63e-05	4.97532e+06	0.0437482	0.204249	22	3.65e-05	4.38624e+06	741061	0.168951	5414483	4904362	3963112	5619332	5306071	4472816	4332260	4241217	3665580	3862909	3309058	3125412	5364137	4857097	3512550	5159045	4.44434e+06
4363	unkown769	0.0065055	0.0420944	18	9	188175	0.583192	1	20	6.00001	726271	0.0249428	0.13657	19	7.6	553851	157705	0.284742	315211	432870	341210	208016	638181	752361	772669	741874	588073	459962	375920	533650	422796	534037	630509	618260	522850
4366	unkown777	0.000320124	0.0059414	24	12	636437	0.160181	1	20.2759	12	5.30698e+06	0.000557812	0.011181	22.1379	12.0855	3.80997e+06	1.53407e+06	0.402646	2577326	2720259	2598508	3060475	3212011	3449815	3368928	3962456	5126655	3663276	4553259	7884711	3374975	3050034	3646974	3345410	3724692
4368	unkown78	0.000987235	0.0119368	18	6	99446.4	0.815439	1	20	6	365000	0.00654057	0.0531495	19	6.01667	302092	66687.9	0.220754	243965	270635	269146	197979	408231	372041	377420	302308	160116	197035	169927	135604	305802	352571	478624	462767	294011
4370	unkown782	0.000987235	0.0119368	18	0	329343	0.0566809	1	25.1282	17.9999	504628	0.000603832	0.0116608	21.5641	18.5055	357391	401799	1.12426	1293180	839541	475496	858263	155258	11393	148211	123733	160695	116698	187538	8076	502594	273367	545875	696685	399788
4372	unkown786	0.0065055	0.0420944	18	0	1.33135e+06	0.317279	1	20	17.9999	5.15703e+06	0.0148263	0.0957973	19	18.05	4.50291e+06	1.23233e+06	0.273674	6749499	5297467	4765431	7813981	3278135	2953037	3889244	2712629	4732849	5536977	4148231	3825104	5259223	5593566	3766156	6009177	4.77067e+06
4375	unkown79	0.00421867	0.0314483	18	3	283397	0.439206	1	20	5.99997	907466	0.0135093	0.0895525	19	4.43332	845668	382775	0.452631	868632	829949	762772	692079	958482	858123	1014339	798920	385795	436685	394839	432462	1092819	1032217	1471964	1419083	840572
4376	unkown791	0.000572095	0.00854353	18	6	475269	0.501702	1	20	6	1.63972e+06	0.00262795	0.0278742	19	6.01667	1.21079e+06	421676	0.348266	823641	895734	778606	1453251	2141338	1653425	1403975	1360129	761815	737007	652449	162589	1349117	1393845	1277612	1710475	1159688
4382	unkown81	0.000572095	0.00854353	18	6	309917	0.385096	1	20	6	1.51214e+06	0.00207544	0.0245303	19	6.01667	1.20644e+06	330990	0.274352	1023018	986571	971990	901597	1548640	1461680	1752885	1285369	1002573	1032797	939489	797641	1322026	1212329	1194511	1228203	1.16633e+06
4383	unkown810	0.0299489	0.115346	18	15	938948	0.252717	1	20	12	6.92383e+06	0.0445317	0.207059	19	13.6167	5.5123e+06	1.5394e+06	0.279265	5239312	5416423	4254029	6369586	5450118	4331594	4061420	4672069	8000374	7842050	5767772	6085115	4599613	5267632	5187354	5413879	5.4974e+06
4384	unkown811	0.0144977	0.0712252	18	3	55619.3	0.765717	1	20	4.56e-05	142076	0.0610642	0.253979	19	1.58336	121328	86023.6	0.709019	251709	89267	122269	105059	91455	198243	160812	80435	90992	44023	46158	7899	110755	378696	201109	195787	135917
4390	unkown82	0.000171384	0.00408964	18	6	2.80968e+06	0.261932	1	20	6.00001	9.37556e+06	0.000494308	0.0105655	19	6.01667	6.29288e+06	3.20606e+06	0.509474	5502287	4684621	3671301	3604959	10084148	9680559	11041734	6695812	3040771	4701244	3826121	2683620	8238092	5758038	5202527	6054104	5.90437e+06
4398	unkown83	0.000171384	0.00408964	18	6	172558	0.166466	1	20	6.00001	551488	0.00032708	0.0081499	19	6.01667	361808	193808	0.535666	339157	271016	224123	191530	584260	599720	647006	374966	161735	272774	197697	170390	389543	320500	308090	360651	338322
4401	unkown834	0.000320124	0.0059414	24	12	490869	0.0547408	1	21.253	12	1.52778e+06	0.000209444	0.00651443	22.6265	12.0444	968592	672784	0.6946	691757	472384	462064	531275	867638	1096392	940332	1281418	1746469	1764738	1449390	1150509	143797	831048	586552	1024380	940009
4402	unkown835	0.0299489	0.115346	18	3	165641	0.630188	1	20	5.9e-05	1.08955e+06	0.0938011	0.343658	19	1.58336	1.02906e+06	203913	0.198155	1185087	1143902	941067	1088134	1234950	984633	1121711	944661	838597	818863	889199	829175	1638187	1098638	1028934	1232503	1.06364e+06
4404	unkown84	0.00164724	0.0165458	18	3	2.65985e+06	0.299861	1	20	6	5.89909e+06	0.00425439	0.0386752	19	4.43333	5.51679e+06	2.83141e+06	0.513236	6288289	6122253	4491863	4360400	6698699	6271611	6237611	4388444	1885962	2462294	2338409	1868319	8258637	7940198	8272590	9779979	5.4791e+06
4407	unkown847	0.0299489	0.115346	18	3	322622	0.89119	1	20	5.99998	3802952	0.123401	0.412086	19	4.43332	3.7643e+06	453268	0.120413	3761632	3501409	3933506	3513087	4064080	4173768	3512184	3461776	3555668	3440716	3206010	2753158	4148359	3834262	5196824	4075779	3.75826e+06
4412	unkown86	8.77e-05	0.00272746	18	6	215084	0.182055	1	20	6	638760	0.000192294	0.00606466	19	6.01667	425945	222284	0.52186	348705	317327	235247	266189	631787	641759	756869	524623	218881	338256	290123	160015	500998	393981	342640	416741	399009
4420	unkown87	0.000171384	0.00408964	18	6	3.49585e+06	0.197144	1	20	6	1.10184e+07	0.000381642	0.00901154	19	6.01667	7.4847e+06	3.72338e+06	0.497466	6287770	5557236	4091877	4694913	11195464	11267822	12693869	8916403	4354162	5467585	5231975	3651507	9377966	6977835	6006344	6763336	7033504
4421	unkown870	0.000987235	0.0119368	18	0	339274	0.173257	1	20	17.9999	1.2916e+06	0.00165462	0.021321	19	18.05	1.15657e+06	272968	0.236014	1460154	1417342	1566263	1637061	527719	847131	834972	935170	1093057	1474535	1110135	1384203	1117090	1517083	1189365	1342864	1215884
4425	unkown876	0.000987235	0.0119368	18	0	1.53393e+06	0.302024	1	20	17.9999	4.76462e+06	0.00271865	0.0283253	19	18.05	4.27939e+06	1.1933e+06	0.278848	6574958	6464232	4385920	6638646	2724660	3243956	2976001	2998032	4053925	5465026	4338416	3696345	4571739	5227874	3586745	5672145	4.53866e+06
4426	unkown877	0.000572095	0.00854353	18	6	1.09877e+06	0.151217	1	20	6	3.77784e+06	0.000895835	0.0148537	19	6.01667	2.88033e+06	776053	0.269432	2827370	2578003	2518728	3048308	3788826	4767038	3405131	3150380	1004084	1347237	1927915	875096	3494869	3626473	2563644	3657515	2.78629e+06
4431	unkown884	8.77e-05	0.00272746	18	9	160839	0.0528186	1	20	5.99999	410668	6.15e-05	0.00326421	19	7.6	268632	171187	0.637255	88816	91767	67419	134287	473138	444417	300261	424858	357047	295871	293887	214500	257408	161265	136479	18263	234980
4442	unkown90	0.000320124	0.0059414	18	3	1.48e+06	0.308607	1	20	6	3.87332e+06	0.00100991	0.0158538	19	4.43333	3.85671e+06	1.80442e+06	0.467865	4480127	4365734	3002361	3103266	5006065	3622306	4228100	2636799	1639213	1715212	1502613	1334043	6102111	5681357	6581875	6321780	3.83269e+06
4448	unkown911	0.000572095	0.00854353	18	6	3.44305e+06	0.118603	1	20	6	1.14727e+07	0.000719109	0.0127684	19	6.01667	8.75495e+06	2.29672e+06	0.262334	8642715	8118300	7820295	9532932	13353898	13116986	10560814	8859000	3492906	3915778	5458891	2941092	10526621	9885601	7675368	11724976	8.47664e+06
4466	unkown939	0.0419656	0.142411	18	9	1.12924e+06	0.204611	1	24.4321	12	7.47184e+06	0.049438	0.220758	21.2161	10.5142	6.91811e+06	863022	0.124748	5861699	5594174	5804326	6528922	6533038	7488940	7643562	8139499	7975192	6367103	7993044	7552020	5099240	6893155	6627628	6982277	6.81774e+06
4469	unkown946	0.00267199	0.0224826	18	0	66083.7	0.268859	1	26.4865	17.9999	125572	0.00591846	0.0494301	22.2432	18.6798	125082	53697.4	0.429298	168621	282187	183645	179566	91782	52945	74654	125331	79602	89109	75675	160521	94452	107323	143708	156806	129120
4484	unkown963	0.0210199	0.0924874	18	12	81930.7	0.465696	1	20	12	799980	0.0550772	0.235226	19	12.0333	627894	210349	0.335008	550368	716894	238698	644492	659187	653578	708575	534139	744824	797299	1067674	590125	385324	377776	408788	570968	603044
4489	unkown97	0.000171384	0.00408964	18	6	651008	0.323164	1	20	6.00001	2007423	0.000598226	0.0116293	19	6.01667	1.32799e+06	701892	0.528535	1114435	1075711	703315	757012	1983114	2275910	2359609	1411059	451559	865698	889101	518569	1891872	1403259	1027712	1159092	1.24294e+06
4494	unkown976	8.77e-05	0.00272746	18	6	1.35207e+06	0.218567	1	20	6.00001	6.40132e+06	0.000227356	0.00676569	19	6.01667	5.02392e+06	1.42245e+06	0.283135	4939425	3996656	3415107	4451521	7174692	5774047	7115696	5540847	3829885	3986284	3633788	3828928	4772748	4707360	5321225	5136582	4.85155e+06
4501	unkown99	0.0144977	0.0712252	18	9	104033	0.170651	1	20	5.99999	614798	0.017323	0.105847	19	7.59999	435056	135135	0.310614	359936	291480	289820	268490	652111	670051	405793	731239	368375	318628	374689	301512	308507	461863	349387	383984	408492
4504	unkown993	0.0210199	0.0924874	18	15	109843	0.997472	1	28	12	575600	0.101999	0.360865	23	14.5119	534832	183215	0.342566	716446	611402	497494	816681	418771	405205	470580	444139	561049	610205	532169	598979	493599	481899	379569	510243	534277
4505	unkown994	0.000320124	0.0059414	18	15	76968.4	0.589679	1	20	12	283789	0.00180747	0.0225175	19	13.6167	227835	94179.9	0.413369	284011	299486	237915	236900	168154	153311	180024	115736	360236	276057	209570	289293	208067	186045	223976	201986	226923

## Sheet: unique cycling AM in AS
ID	CycID	JTK_pvalue	JTK_BH.Q	JTK_period	JTK_adjphase	JTK_amplitude	LS_pvalue	LS_BH.Q	LS_period	LS_adjphase	LS_amplitude	meta2d_pvalue	meta2d_BH.Q	meta2d_period	meta2d_phase	meta2d_Base	meta2d_AMP	meta2d_rAMP	X0	X0.1	X0.2	X0.3	X6	X6.1	X6.2	X6.3	X12	X12.1	X12.2	X12.3	X18	X18.1	X18.2	X18.3	AS	AM	ratio	ratio
3062	unkown4264	0.719948	1	18	6	30228.5	0.999656	1	20	6	63012.2	0.956424	1	19	6.01667	45006.5	17068.9	0.379255	10722	59308	12192	66344	13477	98696	76886	62990	13779	4996	11863	25216	19869	22783	4914	182974	42938.1	435504	0.0985938	10.1426
3130	unkown436	1	1	18	15	3833.58	0.999867	1	20	12	117944	1	1	19	13.6167	117503	10763.9	0.0916047	116216	100767	179622	123792	116975	128954	57788	112253	104653	111577	131689	123855	131039	127974	99632	111599	117399	1.04919e+06	0.111895	8.93695
2374	unkown3284	0.139706	0.540373	24	3	172812	0.915025	1	20.2759	6.63e-05	621214	0.390793	1	22.1379	1.38366	449332	262689	0.58462	305116	409271	588656	1181814	304437	597124	647756	456361	245628	107006	171103	313336	265515	365084	201508	1232843	462035	3.02913e+06	0.15253	6.55607
1787	unkown2660	1	1	18	0	14437	0.688589	1	28	6.63e-05	62550.6	0.945509	1	23	2.72e-05	41670.9	7022.48	0.168523	23725	57449	86697	82332	50744	41520	36536	24653	20466	37528	29523	51105	36069	43065	19985	29397	41924.6	270959	0.154727	6.463
110	LPC 18:2	0.139706	0.540373	24	3	3.98348e+06	0.910294	1	20	6.63e-05	1.30344e+07	0.389432	1	22	1.37504	9.68918e+06	5.49648e+06	0.56728	6539267	8606262	12838073	24154209	6468515	13486004	13880009	10589228	5202397	2291732	4040598	6654046	5970424	7382495	5044808	26553147	9.98133e+06	6.40302e+07	0.155885	6.415
1013	unkown1668	0.587657	1	24	3	17449.3	0.617066	1	28	5.4e-05	76147.7	0.730465	1	26	1.62503	49912.4	18242.5	0.365491	36717	26343	112618	128913	29944	75441	68296	56090	36396	14954	30361	47857	44254	33604	17093	34190	49566.9	312277	0.158728	6.3001
924	unkown1552	0.139706	0.540373	24	3	391396	0.642268	1	25.4179	6.48e-05	1.37454e+06	0.306062	1	24.7089	1.54434	827994	543672	0.656614	510729	364667	1627839	2994929	532145	1343296	1086190	1048582	519728	105833	261098	497542	442266	648313	383484	790780	822339	5.05044e+06	0.162825	6.14155
127	LPE 20:2	0.182589	0.628607	24	3	72890.3	0.474325	1	25.1282	6.11e-05	310657	0.298479	1	24.5641	1.53529	216128	99437.5	0.460087	184651	163205	405647	489125	133452	314777	276876	238296	156307	78132	99246	186842	145414	185570	136750	250033	215270	1318944	0.163214	6.12692
2375	unkown3286	0.475047	1	24	3	31047.3	0.97814	1	20	5.7e-05	91145.2	0.8208	1	22	1.37503	71459	47570.2	0.665699	42633	96030	54565	171353	22580	123016	130718	68481	38124	11519	12445	49165	53093	67150	8454	234472	73987.4	419778	0.176254	5.67365
2945	unkown3979	0.587657	1	18	9	9679.94	1	1	20	6	63586.8	0.900062	1	19	7.6	44848.1	8294.81	0.184953	8375	76788	15733	12046	12304	100210	93048	48785	22576	19889	29866	25292	16027	27710	11182	171650	43217.6	241784	0.178745	5.59457
2367	unkown3276	0.873774	1	24	6	18438.3	0.979881	1	20	6	93458.5	0.989125	1	22	6.05	69805.8	10578.9	0.151548	59578	64510	43954	109849	37391	138857	136069	61517	43084	9354	41148	46571	36427	58493	38673	180918	69149.6	386323	0.178994	5.58677
2947	unkown3986	0.182589	0.628607	18	6	757321	1	1	20	6.00001	2.51148e+06	0.493084	1	19	6.01667	1.92235e+06	733711	0.381673	1149319	1845076	374681	764688	970459	3581996	3615782	1877698	799874	317257	713749	1353413	753570	1288990	822872	9105656	1.83344e+06	1.0067e+07	0.182124	5.49077
4273	unkown600	0.139706	0.540373	24	0	10565.2	0.201653	1	28	6.63e-05	77016	0.12873	0.859469	26	3.08e-05	39654	22110.1	0.557575	90438	30406	102162	85059	12331	32771	14918	58662	27023	22122	10748	27354	22299	20605	36129	23306	38520.8	208073	0.185131	5.40158
2949	unkown3991	0.380147	0.919777	18	6	298223	0.999999	1	20	6.00002	1102130	0.747824	1	19	6.01667	874126	259567	0.296945	546629	929222	567509	388370	531164	1624166	1411258	841932	413119	164322	301894	683228	370476	698975	385400	3625085	842672	4.11508e+06	0.204776	4.88338
1047	unkown1724	0.139706	0.540373	18	15	19169	0.999568	1	20	12	124240	0.414559	1	19	13.6167	106421	29027.5	0.272761	93235	112987	144118	134668	129050	97778	55589	74752	126059	127533	117018	126350	87218	102385	80112	89381	106140	507299	0.209225	4.77954
105	LPC 16:1	0.235786	0.712255	18	6	7.16638e+06	1	1	20	6	2.57499e+07	0.576457	1	19	6.01667	1.9958e+07	6.82965e+06	0.342201	12483908	21904679	5346464	10480641	12105332	36487242	34983588	19423483	9512121	3534668	7420966	14847547	8534018	15868270	9389168	83764352	1.91304e+07	9.02374e+07	0.212001	4.71696
111	LPC 18:3	0.139706	0.540373	24	3	123037	0.991859	1	20	6	428586	0.412435	1	22	4.675	363833	103595	0.284732	263674	430083	353148	458629	254740	571404	551804	336395	190019	86608	158695	261479	225979	305420	179104	1143281	360654	1.69143e+06	0.213225	4.68989
988	unkown1638	1	1	18	9	6691.53	0.995523	1	24.4321	12	67784	0.99999	1	21.2161	10.5142	61466.4	6397.21	0.104077	51768	48808	45498	66588	75745	60565	54538	59000	90270	36272	52985	91609	64727	60241	55201	57744	60722.4	282241	0.215144	4.64805
1676	unkown2542	1	1	24	12	93973.8	0.999718	1	24.9858	12	1.22169e+06	1	1	24.4929	12.0049	1.15382e+06	105277	0.0912419	1103922	1262832	911838	1255959	1531230	1311490	1046023	914305	1401709	936677	1133520	1414861	1075290	1167248	941074	1080603	1.15554e+06	5.26201e+06	0.2196	4.55374
102	LPC 14:0	0.301037	0.811038	18	6	785894	0.981321	1	20	6	3.06385e+06	0.655635	1	19	6.01667	2.40672e+06	581918	0.241789	1746446	2341775	2264934	2697477	1714940	4020318	3918557	2601591	1328645	765043	1172750	1810296	1417846	1941430	1309760	6327443	2.3362e+06	1.04461e+07	0.223643	4.47141
948	unkown1584	0.0787266	0.403933	18	15	17642.7	0.999998	1	28	12	128168	0.278831	1	23	14.5119	114067	37015.1	0.324502	114597	143882	135891	129360	86069	105064	87061	125801	144761	110606	123059	134245	104154	109848	87376	81509	113955	507103	0.224718	4.45002
3688	unkown5249	1	1	18	15	8675.85	0.99992	1	28	12	34304.5	1	1	23	14.5119	32505.8	14660.3	0.451007	43582	20272	79075	37323	23124	33533	29674	6628	36409	23353	26927	50529	43863	23183	16711	25196	32461.4	144295	0.224966	4.44513
106	LPC 17:1	0.475047	1	24	3	24406.5	0.864752	1	20.7529	8.05e-05	65510.7	0.776266	1	22.3765	1.39857	48828.6	22839.5	0.467749	27697	52936	79596	101814	31474	81601	65583	66106	39321	3463	12665	44235	31922	23336	18752	115537	49752.4	217922	0.228304	4.38013
1546	unkown2381	1	1	18	15	7255.62	0.999999	1	20	12	220130	1	1	19	13.6167	203497	15275.2	0.0750638	218923	234931	140489	196662	280677	180877	185948	139811	253404	165770	181797	279547	200733	188439	194545	211026	203349	875574	0.232246	4.30578
552	unkown110	0.873774	1	24	6	5237.01	0.959185	1	28	6.63e-05	62880.2	0.986125	1	26	3.25003	58649.9	889.218	0.0151615	52594	55491	79035	64401	53749	74641	71354	49220	63158	49257	74795	54993	63745	36844	49135	46218	58664.4	251755	0.233021	4.29145
4412	unkown86	0.182589	0.628607	24	3	29959.8	0.943222	1	21.1511	6.63e-05	123350	0.475155	1	22.5755	1.41101	92354.8	44623.1	0.48317	54973	97183	122836	218410	72555	144598	96038	93514	82468	19318	34508	71904	54241	87224	33299	219043	93882	399009	0.235288	4.25011
3831	unkown5450	1	1	18	3	2841.16	0.996446	1	21.3559	7.34e-05	23936.2	0.999994	1	19.678	1.63986	20192.8	4422.45	0.219011	17813	39946	23038	14948	11022	16058	28239	24869	20699	19392	18111	6871	34331	20523	23077	13823	20797.5	88136.1	0.23597	4.23782
977	unkown1624	0.301037	0.811038	18	6	27016.4	0.807892	1	20	6.00001	83412.2	0.587061	1	19	6.01667	59444.9	24328.3	0.409259	42070	39385	25152	81575	80341	107339	80213	65756	66917	14393	24929	58824	62890	20316	40259	93589	56496.8	229923	0.24572	4.06967
118	LPE 16:1	0.235786	0.712255	18	6	7.76419e+06	0.85381	1	20	5.99998	39022718	0.524003	1	19	6.01666	3.0972e+07	6.46316e+06	0.208677	27171916	28130804	28226890	43579093	23214726	52939769	43911816	36024561	22583055	8070964	15697509	27705393	18361450	29764693	16444845	61193611	3.01888e+07	1.22574e+08	0.24629	4.06025
3030	unkown4187	0.301037	0.811038	18	9	12331.9	0.999671	1	20	5.99998	49438.5	0.66232	1	19	7.59999	29111.1	13409	0.460615	9919	15170	3486	2434	14630	58509	86008	38607	19149	3109	6768	26242	3708	8397	14527	112940	26475.2	107323	0.246688	4.05371
985	unkown1634	0.587657	1	18	9	9635.04	0.928271	1	20	5.99999	65678.5	0.876105	1	19	7.59999	55952.9	11427.1	0.204228	50453	39132	18032	64449	79766	76868	62811	43269	47557	53148	64228	61831	47324	68552	26139	55747	53706.6	217330	0.24712	4.04662
2996	unkown4119	0.475047	1	18	6	42058	1	1	20	6	129581	0.828644	1	19	6.01667	101878	32912	0.323052	75784	135801	6533	45367	68145	173129	177718	99332	49389	14277	40463	97151	47791	94102	40021	401238	97890.1	385498	0.253932	3.93807
912	unkown1536	0.475047	1	24	3	288054	0.937395	1	22.2166	6.63e-05	1.64403e+06	0.805556	1	23.1083	1.4443	1.30184e+06	458468	0.352169	914908	1337740	1646832	2676639	1191907	1724091	1424805	1229548	1201689	430449	558615	1400003	1000335	1138565	679351	2415579	1310691	5.14663e+06	0.25467	3.92665
991	unkown1640	1	1	24	12	9939.09	0.999992	1	23.9024	5.99999	100581	1	1	23.9512	8.99392	94858.5	6767.52	0.0713432	106309	77012	89379	86919	109852	116740	102180	73551	131390	58001	100996	104376	90622	117532	83793	68840	94843.2	367166	0.258312	3.87129
4311	unkown64	0.182589	0.628607	24	3	731572	0.998702	1	20	6.63e-05	2.65252e+06	0.492681	1	22	1.37504	2.37133e+06	1.15545e+06	0.487259	1784877	3269180	2340010	3216021	2432102	3173254	2776979	2067057	1615742	574590	1027807	2371634	1402155	1867738	1124387	7880311	2.43274e+06	9.27521e+06	0.262284	3.81266
52	DG 34:3	1	1	18	0	13989.6	1	1	26.1721	17.9999	86048.5	1	1	22.0861	18.6379	85239.8	8852.67	0.103856	45559	158847	38784	146988	71206	61367	119119	61531	147010	17919	64950	98002	152140	56604	67608	67842	85967.2	326986	0.262908	3.80361
913	unkown1538	0.301037	0.811038	18	15	15907.4	0.999679	1	28	12	120460	0.662323	1	23	14.5119	103209	39452.5	0.38226	87872	111029	122404	156978	63713	91639	131727	90204	128257	115920	122671	114994	74872	98573	69855	68720	103089	386740	0.266559	3.75151
3018	unkown4166	0.587657	1	24	3	9813.23	0.768093	1	20	5.99998	50500.8	0.810425	1	22	4.67499	42141	9523.43	0.22599	39262	29485	50972	64656	33229	73610	49239	45925	29999	32033	30485	32867	49295	35957	22632	49933	41848.7	156708	0.26705	3.74462
4420	unkown87	0.139706	0.540373	24	3	611086	0.788859	1	20.7529	6.63e-05	2.38285e+06	0.35326	1	22.3765	1.39857	1.86838e+06	715374	0.382884	1404203	1795716	2512149	3819353	1707415	2772678	2398641	1862485	1474880	650197	940140	1525804	1274328	1509390	1069870	3639826	1.89732e+06	7033504	0.269754	3.70708
2368	unkown3277	0.139706	0.540373	24	3	103859	0.492877	1	23.52	6.63e-05	430011	0.253102	1	23.76	1.48503	309160	133313	0.43121	244386	210944	558563	706154	231548	459312	399598	369077	233882	103645	152570	242359	243812	233648	215295	351372	309760	1.13869e+06	0.272032	3.67603
124	LPE 18:3	0.475047	1	24	3	389261	0.732682	1	20	6	1.7098e+06	0.715394	1	22	4.675	1.36555e+06	426980	0.31268	1143387	1173479	1388327	2264104	1043176	2254639	1928631	1612760	1055502	359795	717920	1177950	1026406	1357509	737426	2398123	1.35245e+06	4.88861e+06	0.276653	3.61464
4398	unkown83	0.380147	0.919777	24	3	36007.1	0.946844	1	20	6	117578	0.727734	1	22	4.675	95804.5	27297.7	0.284931	55926	75035	124813	185353	73790	117461	132853	146206	39563	17054	50085	82024	44389	85466	40163	249286	94966.7	338322	0.280699	3.56254
3136	unkown4381	0.182589	0.628607	18	0	15686.3	0.675574	1	28	12	36032.5	0.381493	1	23	4.92857	57600	69920.6	1.2139	46419	31889	235756	265290	22475	15882	46249	19501	31066	41729	47358	23977	28663	27617	23596	37200	59041.7	210098	0.28102	3.55847
2369	unkown3278	0.0579045	0.352905	24	3	2.65904e+06	0.453239	1	23.2718	6.63e-05	9.91605e+06	0.121783	0.832594	23.6359	1.47728	7.14144e+06	3.1353e+06	0.439029	5845288	5233920	12481448	16103556	5213115	10660840	9422555	8647418	5141047	2329256	3794630	5360444	5297641	5856660	4468419	8759407	7.16348e+06	2.54602e+07	0.28136	3.55416
3134	unkown4378	0.587657	1	18	0	14578.6	0.715318	1	28	12	42430	0.784664	1	23	4.92857	68287.3	85830.3	1.2569	43573	36932	298175	313373	19790	30527	48030	16685	41787	43952	43436	40545	45946	42226	21200	34735	70057	248289	0.28216	3.54409
812	unkown1409	0.475047	1	24	3	297667	0.937765	1	20	6.63e-05	1.40188e+06	0.805699	1	22	1.37504	1.14639e+06	392089	0.34202	870718	1254435	1404795	2077558	952338	1682916	1429110	1096772	923916	294999	546168	1271133	817712	1034952	639490	2378712	1.16723e+06	4.06438e+06	0.287186	3.48207
919	unkown1547	0.139706	0.540373	24	3	47929.1	0.631858	1	21.6708	6.04e-05	185794	0.302544	1	22.8354	1.42724	142763	51949.9	0.363888	85202	128133	216994	312846	141511	193893	140381	239456	174758	43613	48521	78363	97052	113871	116318	175439	144147	500282	0.288131	3.47064
2434	unkown3358	1	1	18	9	5094	1	1	28	6	31218.8	1	1	23	8.21428	26766.2	3221	0.120339	31952	18839	8022	23353	19791	48712	19598	36774	19173	44014	25648	15621	36768	39842	25972	11834	26619.6	91600.8	0.290604	3.44111
837	unkown1445	0.182589	0.628607	18	6	17515.2	0.997625	1	20	6	77729.5	0.492347	1	19	6.01667	66276.4	11324.1	0.170861	35932	69314	51679	79077	60457	95785	85512	69164	54734	20643	31728	63078	57635	76352	41522	145855	64904.2	222434	0.291791	3.42711
4363	unkown769	1	1	18	3	32829.9	0.996978	1	20	6.00001	177802	0.999995	1	19	4.43334	154829	33611.4	0.217088	130799	63240	236029	213077	179521	222243	197149	112295	179648	160700	80537	68545	164761	207391	148450	105712	154381	522850	0.295268	3.38675
619	unkown117	0.139706	0.540373	24	3	93798.8	0.792062	1	20	6.63e-05	359449	0.354246	1	22	1.37504	285038	114036	0.400075	235908	292120	349930	559840	224079	439823	367424	310832	225314	99183	137126	213946	185114	242877	173972	600091	291099	981938	0.296453	3.37321
137	LPI 18:0	0.301037	0.811038	18	15	102095	0.996809	1	28	12	1.25756e+06	0.661284	1	23	14.5119	1.13011e+06	276066	0.244283	1057721	1226249	1249132	1409523	1051002	1137198	1183874	937455	1452353	1085830	1145365	1346705	1011455	969566	869752	935131	1.12927e+06	3.79786e+06	0.297343	3.36312
4324	unkown69	0.719948	1	18	6	362616	0.99957	1	20	6.00001	2.15759e+06	0.956404	1	19	6.01667	1.88814e+06	216904	0.114877	1511147	2169276	1462574	2322702	1633528	2781536	2458677	1756633	1497512	471577	807555	1943059	958264	1908525	902070	5205107	1.86186e+06	6.21846e+06	0.299408	3.33992
116	LPE 14:0	0.0787266	0.403933	18	6	184292	0.404468	1	20	6	1.00525e+06	0.141602	0.896699	19	6.01667	793618	185297	0.233484	720150	637011	684807	1051638	817844	1293959	973825	935373	640996	353672	458543	725304	686470	803469	507235	1048318	771163	2.55977e+06	0.301263	3.31936
3133	unkown4377	0.301037	0.811038	18	0	9732.97	0.623318	1	28	12	44658.8	0.501608	1	23	4.92856	66812.8	64294.6	0.962309	53293	49928	227735	272313	32060	40277	46997	37225	42930	38472	51301	45932	45694	28656	38731	38671	68138.4	225441	0.302245	3.30858
3132	unkown4376	0.0787266	0.403933	18	15	20438.2	0.748093	1	28	12	57668.2	0.225685	1	23	14.5119	83382.8	52107.2	0.624916	57199	50458	305819	353048	31071	49173	42971	18996	50272	58436	78661	43304	54715	49075	39225	49177	83225	274364	0.303338	3.29665
921	unkown1549	0.719948	1	24	3	39386.7	0.870985	1	26.4865	4.68e-05	231753	0.919719	1	25.2432	1.57773	165719	60234.8	0.363477	141368	90278	241804	453563	125966	219115	208052	156753	126408	40730	113406	174232	152799	161701	76131	154260	164785	540070	0.305119	3.27741
3053	unkown4240	0.475047	1	24	3	10308.2	0.870169	1	20	6.63e-05	38787	0.778547	1	22	1.37504	29685.5	14253.4	0.480149	31019	19847	29770	74512	9075	42687	45576	39717	14781	11445	15046	22342	20992	28255	24234	57791	30443.1	98529.3	0.308975	3.23651
1000	unkown1656	0.0579045	0.352905	18	15	27704.8	0.999735	1	28	12	151578	0.222829	1	23	14.5119	131388	56445.7	0.42961	149294	173794	139282	177648	91721	126315	119199	107874	160046	133951	146695	165620	94619	126990	92762	93668	131217	414743	0.316382	3.16073
2769	unkown3744	0.182589	0.628607	18	15	15973.2	0.667629	1	20	12	50931.5	0.378449	1	19	13.6167	31486.6	24017	0.762768	15729	16801	59275	30480	10377	26299	10076	7990	82800	21513	41834	57579	7551	21931	53144	36685	31254	98547.9	0.317145	3.15313
949	unkown1589	0.0787266	0.403933	18	9	60025.8	0.777938	1	28	6.00002	168542	0.232293	1	23	8.21429	125165	37915.3	0.302923	92403	78849	14398	33219	169142	195692	195395	113938	162669	83126	96480	169987	130207	115846	115426	208252	123439	376396	0.32795	3.04924
964	unkown1603	0.139706	0.540373	18	6	159574	0.343462	1	20	6	603176	0.193705	1	19	6.01667	466701	105864	0.226835	473430	315042	509198	698760	387220	720786	659082	645615	329629	131690	314659	391082	341274	522844	248693	572948	453872	1.36976e+06	0.331351	3.01795
3135	unkown4380	0.235786	0.712255	18	0	29853	0.613202	1	28	12	76281.2	0.424196	1	23	4.92857	114543	120027	1.04788	103775	83218	397044	472549	72055	47835	83280	38478	61541	83621	97178	62785	76443	59892	53752	78838	117018	352713	0.331765	3.01418
721	unkown1273	0.182589	0.628607	18	6	750852	0.9998	1	20	6	3.36714e+06	0.493022	1	19	6.01667	2.73745e+06	633057	0.231258	2224533	3269180	2340010	1473903	2432102	4352340	3865277	2818826	1916102	704605	1392253	2371634	1819789	2304942	1405977	7880311	2.66074e+06	7.98071e+06	0.333396	2.99944
4301	unkown61	0.719948	1	24	3	48184.7	0.986975	1	20	6	266822	0.953363	1	22	4.675	240981	30273.7	0.125627	254482	258464	218163	321159	247475	329492	262101	228219	236075	112734	124069	260819	160870	216730	150549	459423	240052	717320	0.33465	2.98819
4390	unkown82	0.139706	0.540373	24	3	578467	0.99874	1	20	6.63e-05	2.16827e+06	0.414331	1	22	1.37504	1.91639e+06	1.18422e+06	0.617941	1311960	1651251	2324248	3385614	1443566	2309920	2294084	1850631	1139873	474265	841677	1549154	1188295	1455155	900325	7549320	1.97933e+06	5.90437e+06	0.335232	2.98301
4489	unkown97	0.105571	0.468626	24	3	156154	0.996014	1	20	6.63e-05	480869	0.341986	1	22	1.37504	404091	264527	0.654622	250832	611728	438525	622393	266429	562580	491929	392646	220426	77996	170396	295323	219105	298134	179611	1592367	418151	1.24294e+06	0.336421	2.97246
971	unkown1616	0.235786	0.712255	18	6	45171.2	0.671827	1	20	5.99998	270221	0.450287	1	19	6.01666	234384	25249.4	0.107727	216021	179922	253168	330055	193293	304334	337883	245373	184371	79527	120441	193606	170484	390549	279258	222902	231324	685741	0.337335	2.96441
817	unkown1414	0.105571	0.468626	18	6	30977.3	0.995408	1	20	5.99998	182481	0.341842	1	19	6.01666	159985	23701.3	0.148147	141179	120400	121070	187788	234054	195694	135658	164517	135552	78389	119080	171132	161381	218168	142940	186805	157113	462608	0.339624	2.94443
709	unkown1260	0.105571	0.468626	24	3	98759.8	0.621928	1	20	5.99998	436020	0.244462	1	22	4.67499	364324	89729.8	0.246291	337544	374917	363113	515886	381077	515091	438683	409227	267396	144479	224810	298816	299215	302617	236968	675283	361570	1.0642e+06	0.339757	2.94328
134	LPG 18:1	0.475047	1	18	6	51548.8	1	1	20	6	158952	0.828644	1	19	6.01666	125245	43111.2	0.344215	70167	117767	51679	54852	102531	215878	189129	128269	116744	22445	54801	129152	74152	127820	34924	430025	120021	348677	0.344218	2.90513
115	LPE 12:0	0.105571	0.468626	24	6	130101	0.599935	1	20	6	555627	0.238098	1	22	6.05	429650	64120.1	0.149238	413731	437279	412622	515600	433279	692645	622822	473763	324220	136166	225720	407928	292971	404907	248941	768170	425673	1.23229e+06	0.345434	2.89491
4342	unkown731	1	1	24	0	16121.3	0.805925	1	27.8233	17.9999	63908.1	0.979815	1	25.9117	21.3374	96381.8	74124.8	0.769075	38087	40133	499432	267715	62677	37679	26742	40681	62795	30247	61299	17716	85858	60827	56231	52717	90052.2	258256	0.348694	2.86784
103	LPC 14:1/0:0	0.139706	0.540373	24	3	148012	0.987147	1	20	6	559161	0.411132	1	22	4.675	448851	168482	0.375364	389697	558899	358347	469541	352045	748662	675577	460361	254721	108246	177908	329275	253393	370141	257869	1334194	443680	1.27081e+06	0.34913	2.86426
2975	unkown4068	0.235786	0.712255	18	6	89713.5	0.999999	1	20	6	308897	0.576457	1	19	6.01667	197907	130620	0.660006	59226	143409	6644	58942	51865	511660	441665	230399	46521	6942	40732	97650	78465	109257	34780	995095	182078	518870	0.350913	2.84971
3453	unkown4867	0.380147	0.919777	18	6	27585.6	0.982081	1	20	6	231586	0.741175	1	19	6.01667	206766	27467.3	0.132842	185923	180188	223894	154442	157626	235900	262290	270529	174221	180402	196399	204476	195126	200499	211068	222014	203437	575256	0.353646	2.82768
963	unkown1602	0.0579045	0.352905	18	15	92298.6	0.831928	1	28	12	365634	0.194278	1	23	14.5119	392494	187754	0.47836	362096	328893	937836	1015304	292702	318182	247297	195432	297815	388996	445781	329943	316796	271504	250828	271412	391926	1.10031e+06	0.356195	2.80745
3911	unkown5551	1	1	24	6	5214.21	0.999977	1	28	12	41132	1	1	26	8.82143	37899.8	3087.3	0.0814595	46032	20669	37963	64241	40153	21778	41504	53979	28607	29768	65765	40388	47590	20670	27981	23762	38178.1	106335	0.359036	2.78524
728	unkown1284	0.587657	1	18	6	58827.4	0.971785	1	20	6	227208	0.891012	1	19	6.01667	177079	46898.2	0.264843	192119	170381	62237	221731	156516	253203	280236	218877	135310	39874	113009	180763	135068	158690	71108	353213	171396	476583	0.359635	2.7806
593	unkown1141	0.0787266	0.403933	18	6	91417.1	0.940369	1	20	6	306870	0.266757	1	19	6.01667	237708	62848.9	0.264395	197900	260858	166006	240547	254925	387539	344195	240819	132100	29304	88924	206596	165738	241067	130797	594158	230092	639372	0.359872	2.77877
944	unkown1578	0.139706	0.540373	18	6	137093	0.941773	1	20	6	483770	0.398426	1	19	6.01667	366050	124944	0.341329	356541	363328	151801	261410	287440	635081	557297	455261	334156	121602	223526	358210	257450	403435	261679	586333	350909	974181	0.36021	2.77616
1003	unkown1659	0.719948	1	18	6	15213.8	0.955034	1	28	6	76075.8	0.94513	1	23	6.29762	66745.5	8142.95	0.122	50893	25683	24591	62227	106194	75935	68134	54040	58633	60465	36754	70524	114991	79242	87640	87494	66465	183689	0.361835	2.76369
730	unkown1289	0.235786	0.712255	18	6	105295	0.988623	1	20	6	368866	0.572566	1	19	6.01667	279265	99003	0.354513	233393	281873	103054	190945	214085	450826	443450	367101	219697	110322	177400	278218	194504	308619	180723	522072	267268	736475	0.362901	2.75557
138	LPI 18:1	0.873774	1	18	9	135666	0.98788	1	20	6	2429117	0.990182	1	19	7.6	2.24101e+06	170174	0.0759362	2103138	1563567	2212029	2405743	2329758	2731420	2259168	2396122	2650638	1687060	1963279	2439720	2200874	2283036	1900360	2195043	2.20756e+06	6.06295e+06	0.364107	2.74645
920	unkown1548	0.380147	0.919777	18	6	55169.5	0.786667	1	20	6.00001	198788	0.660046	1	19	6.01667	158326	30702.4	0.193918	140451	32167	201165	300938	143566	255526	203753	192307	108765	66636	59940	149283	144862	163866	116770	193698	154606	423033	0.36547	2.7362
917	unkown1543	1	1	24	18	39258.4	0.781632	1	28	6.00003	291492	0.974204	1	26	25.5357	292994	17799.4	0.0607501	256583	222751	264702	236560	351041	329669	242205	243054	346744	236744	254172	305379	390742	374383	294826	321481	291940	798800	0.365473	2.73618
2978	unkown4071	0.380147	0.919777	18	6	7.9316e+06	1	1	20	6.00001	2.49794e+07	0.747824	1	19	6.01667	1.82837e+07	7.7598e+06	0.42441	10075877	20443380	3439058	8142151	9717832	35689085	35030958	19479771	8383449	2567932	6210946	12656971	7817566	12453365	7142147	78243717	1.73434e+07	4.65971e+07	0.372199	2.68674
909	unkown1530	1	1	18	9	20661.7	0.999899	1	28	6	149006	1	1	23	8.21429	137889	12694.1	0.0920598	95177	103811	92843	170526	211079	124272	106449	154223	196292	107186	137885	130072	113688	177797	110032	165652	137312	364024	0.377204	2.65108
916	unkown1541	0.380147	0.919777	24	18	23475.8	0.5946	1	28	17.9999	92223.4	0.562165	1	26	18.1071	69394.5	6702.52	0.0965858	52858	75626	38953	37170	85071	66992	29621	48615	108905	48448	41481	101977	110626	98700	87126	72442	69038.2	182715	0.377846	2.64658
2191	unkown3093	0.182589	0.628607	18	6	208496	0.761666	1	28	6	846192	0.413428	1	23	6.29762	782588	18653.9	0.0238362	622608	419145	460871	502378	1067608	805920	712664	798574	604565	371520	447854	698930	1570504	1248589	1122599	1077368	783231	2.06813e+06	0.378714	2.64051
65	FA 16:1 (palmitoleic acid)	0.587657	1	24	18	408511	0.777973	1	28	5.99999	3.89293e+06	0.815006	1	26	25.5357	3.98737e+06	488607	0.122539	3536436	2989628	3448504	3669449	4538632	4511568	3295908	3225622	4093675	3374849	3284803	4095840	6017122	4690979	4001725	4560034	3.95842e+06	10422375	0.379801	2.63296
1493	unkown2315	0.380147	0.919777	24	9	25458.3	0.92748	1	25.4179	12	394971	0.720136	1	24.7089	10.4656	376084	23387.9	0.062188	425204	356879	349520	360922	409009	437715	384912	320024	392689	389523	416256	381417	367892	353326	351264	332137	376793	975835	0.386124	2.58984
2951	unkown3997	0.475047	1	18	6	88522.7	0.987006	1	20	6	312298	0.824009	1	19	6.01667	237939	76076.4	0.31973	252768	279101	80864	154567	143528	404778	377471	323414	193477	58839	147473	187626	163348	235397	175874	481002	228720	591627	0.386596	2.58668
855	unkown1467	0.235786	0.712255	24	3	97551.4	0.618919	1	20	6	384380	0.426796	1	22	4.675	309865	88340.7	0.285094	259302	350152	329143	476961	180534	564892	466947	325146	168254	91158	231852	225166	208372	325082	206270	505227	307154	784508	0.391524	2.55412
3075	unkown4296	1	1	18	6	22116.2	0.999896	1	20	6.00002	69891	1	1	19	6.01667	52428.5	20573.9	0.392419	45525	56613	7849	24257	24042	87224	105303	62995	51812	12441	44947	51169	17450	50013	46702	110623	49935.3	127358	0.392085	2.55047
1012	unkown1667	0.719948	1	18	6	159974	0.894801	1	28	6.00002	871138	0.927489	1	23	6.29763	774434	107409	0.138694	658628	464936	448542	436180	1215774	893030	675347	700403	736925	645027	606917	868132	1095114	1136101	779527	971150	770733	1.92838e+06	0.39968	2.502
742	unkown1308	0.182589	0.628607	18	6	84641.4	0.860994	1	20	6	366475	0.448072	1	19	6.01667	303741	44250.9	0.145686	237159	363027	322491	368466	311787	431638	385091	337383	176248	78979	138933	216491	162230	326996	167080	750064	298379	739464	0.403507	2.47827
2377	unkown3288	0.235786	0.712255	18	6	9.52496e+06	0.999994	1	20	6	2.99073e+07	0.576455	1	19	6.01667	2.08067e+07	1.04709e+07	0.503246	13393714	20477847	3494193	6767927	12735711	44518601	39772970	22601955	10554707	3653910	7423524	15359229	9106129	15797689	8807951	78138789	1.95378e+07	4.81219e+07	0.406007	2.46301
3063	unkown4265	0.587657	1	24	3	21805.9	0.954885	1	24.8451	6.63e-05	193251	0.885361	1	24.4225	1.52644	159985	38540.4	0.2409	162928	135283	205678	269116	51113	204571	168462	188342	132738	90228	150876	150095	167599	107608	163927	207057	159726	392466	0.406982	2.45711
2931	unkown3948	0.301037	0.811038	18	6	23049.2	0.994519	1	20	6.00001	76916.8	0.660454	1	19	6.01667	61154.9	13366.2	0.218563	37610	63700	43094	90786	40330	94777	101331	71229	37231	3938	21182	48772	30992	53393	26164	188034	59535.2	145592	0.408919	2.44547
1140	unkown1842	0.139706	0.540373	18	6	57126.1	0.999602	1	20	6.00001	327378	0.414568	1	19	6.01667	274939	62326.8	0.226693	233486	112690	215565	259860	553703	355801	219845	180163	183965	121495	143308	228487	423068	398315	330683	317749	267386	652078	0.410053	2.43871
957	unkown1597	1	1	24	18	18979.5	0.978725	1	28	6.00002	105773	0.999772	1	26	25.5357	107994	13774.8	0.127552	114829	88013	85946	66620	149031	119351	83426	71283	125788	63240	74445	138158	153938	149283	117490	114006	107178	259520	0.412985	2.42139
4314	unkown66	0.139706	0.540373	18	3	75265.2	0.888673	1	20	6	619098	0.383166	1	19	4.43333	578198	95549.8	0.165254	556453	435879	623394	677331	785229	580841	552771	557550	523078	422314	448171	533618	622360	666673	579769	665393	576926	1.39031e+06	0.414963	2.40985
68	FA 18:1 (oleic acid)	0.873774	1	18	6	1.59254e+06	0.835703	1	28	5.99999	8.85054e+06	0.959807	1	23	6.29761	7.96121e+06	1.03289e+06	0.12974	6961511	4471570	4602763	4724618	12286188	9226825	6963693	6925444	6610176	6744781	7204275	9094619	11608020	10672284	8848196	9865005	7925623	19075794	0.415481	2.40685
904	unkown1524	0.182589	0.628607	18	6	30136.2	0.797589	1	20	6	121158	0.426215	1	19	6.01667	100784	11450.9	0.113619	70804	106765	98494	191865	103153	116024	151222	114234	79727	22363	32831	66458	61302	99850	49325	225920	99396.1	238924	0.416016	2.40375
1060	unkown1737	1	1	18	9	32440.6	0.990642	1	23.9024	6.00002	168498	0.999956	1	20.9512	7.86741	134939	44859	0.332439	46522	96027	85325	143507	108553	321258	130061	114121	334384	102314	23421	157145	119039	108877	35284	137827	128979	308908	0.417532	2.39503
4425	unkown876	0.380147	0.919777	24	3	236591	0.44795	1	28	6.63e-05	2.56863e+06	0.471741	1	26	1.62503	1.89829e+06	136182	0.0717392	2284194	1618843	3633509	2738011	1881952	1717328	1615236	1784280	1853637	1848572	1309789	1520928	1893770	1455024	1439490	1736789	1.89571e+06	4.53866e+06	0.41768	2.39418
2610	unkown3537	1	1	18	9	11230.3	0.995454	1	25.5652	12	60892.5	0.99999	1	21.7826	10.5579	52551.5	8537.87	0.162467	36594	40251	21882	59780	90164	30457	66975	30582	36046	47772	78467	81285	75531	57941	32180	42214	51757.6	123490	0.419125	2.38592
1005	unkown1660	0.587657	1	24	18	28284.3	0.526323	1	28	17.9999	146005	0.672243	1	26	18.1071	110927	11848.3	0.106812	95971	77181	47426	68354	150983	129746	88687	75947	125977	87170	105180	148262	192777	148945	106070	136227	111556	266164	0.419127	2.38591
69	FA 18:2 (linoleic acid)	0.587657	1	18	6	806855	0.976293	1	28	6	7.8551e+06	0.89249	1	23	6.29762	7.42051e+06	165297	0.0222756	7220115	5551773	5398170	5319735	10691757	8727873	6500018	5500751	6941407	5239437	5736021	7715147	11173975	10265017	8563730	8092110	7.41481e+06	1.76627e+07	0.419801	2.38208
958	unkown1598	0.475047	1	18	6	62748.1	0.995713	1	28	6	579024	0.827124	1	23	6.29762	532704	30012.5	0.05634	498841	404537	387335	378899	802430	612822	491386	409458	526305	375222	415714	545124	784112	708208	592701	573628	531670	1.26293e+06	0.420982	2.3754
2376	unkown3287	0.380147	0.919777	18	6	483202	0.999998	1	20	6	1.68337e+06	0.747824	1	19	6.01667	1.18773e+06	579215	0.487668	744625	1176263	211963	388846	773965	2458186	2294102	1207210	567688	219671	664000	939480	544257	866878	499738	4323705	1.11754e+06	2.65289e+06	0.421252	2.37387
1007	unkown1662	0.475047	1	18	9	57338.2	0.57887	1	28	6.00001	246355	0.630008	1	23	8.21429	217873	21040.4	0.096572	157911	114361	130551	136903	297739	268531	219165	199986	178896	191633	206057	271942	294336	267931	245832	288870	216915	514274	0.421789	2.37085
1011	unkown1666	0.873774	1	24	15	39826	0.731887	1	28	6.00002	196004	0.925402	1	26	10.9107	183502	1538.39	0.0083835	163888	103145	105872	105292	280778	207708	142420	153109	195472	142792	145117	238361	266301	263438	194148	230173	183626	431487	0.425566	2.34981
741	unkown1307	0.0787266	0.403933	18	6	41023.2	0.231552	1	20	6	171094	0.0912326	0.709947	19	6.01667	126973	34412.7	0.271024	100156	150941	137799	156984	103459	206670	181822	192426	115342	23319	78645	56299	121474	92552	66220	180733	122803	288321	0.425923	2.34784
2379	unkown3291	0.105571	0.468626	18	6	1.59738e+06	0.999971	1	20	6	5.38926e+06	0.342926	1	19	6.01667	3.51833e+06	2.15372e+06	0.612144	2018795	2718086	417775	912393	2105585	8179792	7072588	4199062	1420827	444949	968869	2020621	1506107	2581064	1389577	14161330	3.25734e+06	7.61829e+06	0.427568	2.33881
101	LPC 12:0	0.0787266	0.403933	18	6	717003	0.957475	1	20	6	2493043	0.27025	1	19	6.01667	1.90225e+06	540942	0.284369	1367314	1949395	1705146	1845100	1666148	3219884	2985210	2100930	1058820	410225	834314	1371517	1106665	1719183	1071767	4975633	1.8367e+06	4.28796e+06	0.42834	2.3346
4328	unkown70	1	1	24	0	10768.5	1	1	20	6	398435	1	1	22	3.3	395269	18752.2	0.0474415	421071	364557	381097	396585	540388	395430	334640	323282	440748	270946	322139	501598	429338	376508	401393	426180	395369	920274	0.429621	2.32763
906	unkown1528	0.587657	1	24	3	37868.6	0.949301	1	20.6557	6.63e-05	225681	0.883456	1	22.3279	1.39553	191080	49885	0.261069	158621	207453	225921	310731	186129	230647	227973	184886	170854	59869	112864	228915	146297	177540	122829	339283	193176	445198	0.43391	2.30463
847	unkown1456	0.301037	0.811038	18	6	53181.1	0.999764	1	20	6	160348	0.662354	1	19	6.01667	122003	42324.5	0.346913	102590	158752	19824	70349	128546	191770	175177	145897	97694	11357	46293	157154	87020	137030	58699	281834	116874	269165	0.43421	2.30303
4421	unkown870	0.105571	0.468626	18	0	136575	0.713795	1	20	12	556615	0.270191	1	19	15.2	512782	182837	0.356559	725389	704968	555762	718986	209993	349496	304995	597008	510848	612193	577063	526355	480578	700105	474521	452765	531314	1215884	0.436978	2.28845
828	unkown1431	0.235786	0.712255	18	6	115408	0.893506	1	20	6	427364	0.538791	1	19	6.01667	309183	125223	0.405012	268235	319389	96004	228969	239806	562167	477240	430243	257037	76298	179331	329042	195031	359838	199914	485596	294009	670017	0.438808	2.2789
952	unkown1592	0.873774	1	18	6	22520.5	0.724787	1	28	6.00001	204500	0.922599	1	23	6.29762	198730	2587.64	0.0130209	195998	130592	139133	147535	242779	218103	195959	161161	186206	132745	178626	214977	286088	277300	232742	238304	198640	452432	0.43905	2.27764
810	unkown1407	0.873774	1	24	3	41212.3	0.977899	1	20	6.63e-05	224857	0.988855	1	22	1.37504	197907	64955.5	0.328212	134618	200351	244038	320421	183517	299881	222233	193458	173339	47218	88446	233377	146086	203397	121216	410160	201360	457492	0.440138	2.27201
2669	unkown3609	0.0579045	0.352905	18	0	22081.2	0.43363	1	25.8651	6.63e-05	76041.8	0.117624	0.823736	21.9326	2.81e-05	50538.4	16899.2	0.334383	104937	79318	67367	52546	13649	63728	27451	59021	48858	30540	40198	32702	68695	33380	64026	44217	51914.6	117093	0.443362	2.2555
1001	unkown1657	0.0787266	0.403933	18	15	13287.2	0.997091	1	20	12	110934	0.278249	1	19	13.6167	87132.9	32151.2	0.36899	96473	99499	88116	117438	32203	88946	102253	75111	109427	105519	96317	132472	61552	50800	57465	75553	86821.5	195606	0.443858	2.25297
2941	unkown3963	0.139706	0.540373	18	6	21903.7	0.484498	1	20	5.99998	78629.5	0.24996	1	19	6.01666	58916.9	15871.7	0.269391	56513	46928	61771	76851	35969	101139	89761	87649	24267	3407	34295	46419	49741	54178	37122	105887	56993.6	128336	0.444096	2.25177
956	unkown1596	0.380147	0.919777	18	6	32848.3	0.986229	1	28	6	235617	0.742725	1	23	6.29762	222150	187.565	0.00084432	235739	164415	164825	178549	283377	262358	223939	172794	205243	144002	181064	208020	297400	336940	240700	254927	222143	499676	0.444574	2.24934
799	unkown1391	0.0787266	0.403933	18	6	208947	0.903396	1	20	5.99998	690850	0.259121	1	19	6.01666	504729	185484	0.367492	447797	734005	159238	295702	450156	924592	821514	567140	313900	141326	279271	436967	384327	601310	282561	876231	482252	1.07865e+06	0.44709	2.23669
950	unkown1590	1	1	24	18	17333.3	0.982866	1	28	6.00002	106272	0.999852	1	26	25.5357	105775	11704.8	0.110657	71412	93676	92022	75090	147760	113667	91635	72024	144782	63601	60522	126749	147822	161076	108132	111334	105082	234891	0.447362	2.23533
811	unkown1408	0.380147	0.919777	24	3	47120.9	0.8633	1	20	6	185255	0.693837	1	22	4.675	157928	36504.1	0.231143	114136	162944	189032	225301	131880	205598	211685	191858	126890	31919	80669	131673	120587	131212	109488	344057	156808	349948	0.44809	2.2317
2977	unkown4070	0.235786	0.712255	18	6	1.06969e+06	0.999999	1	20	6.00001	3430569	0.576457	1	19	6.01667	2.37365e+06	1.21947e+06	0.513755	1139963	2321202	309425	975929	957722	5078658	5061251	2624645	887802	249936	696612	1290144	835868	1372250	777594	11034914	2.22587e+06	4.96245e+06	0.448542	2.22944
748	unkown1319	0.873774	1	18	6	56033.6	0.999132	1	20	6	340954	0.991573	1	19	6.01667	293297	38810.6	0.132325	219547	274364	314605	359146	248011	440573	395454	279780	204850	69949	173591	324400	142109	326596	122993	721542	288594	642751	0.448999	2.22718
117	LPE 16:0	1	1	18	3	556121	0.948616	1	20	6	8.25468e+06	0.998657	1	19	4.43333	7.52926e+06	812245	0.107878	8580854	6381717	7760974	7444042	10211262	8386856	7184511	7236088	6999363	5679381	6482478	8561574	7283458	8008504	6895278	7198828	7518448	1.67337e+07	0.449299	2.22569
1066	unkown1744	0.105571	0.468626	18	6	307119	0.999592	1	28	6	1.55916e+06	0.342836	1	23	6.29762	1.26283e+06	138719	0.109848	1043708	594622	600011	772893	2701323	1535609	916046	1083644	1030430	462547	703563	999267	2090429	2250190	1858000	1486540	1.25805e+06	2.79682e+06	0.449815	2.22314
2937	unkown3958	0.235786	0.712255	24	3	42635.4	0.65418	1	20	6	156795	0.442565	1	22	4.675	122992	42370.7	0.344498	116213	119711	131554	168203	77868	202876	178692	167744	74542	31867	74523	103734	89388	102397	75432	232329	121692	269966	0.450769	2.21843
903	unkown1523	0.301037	0.811038	24	3	33872.9	0.904072	1	20	6.63e-05	172818	0.626339	1	22	1.37504	150768	56576.3	0.375253	118485	137739	201622	233428	145892	196667	208648	126798	89361	72781	79369	153087	106551	165836	107704	316438	153775	340292	0.451892	2.21292
815	unkown1412	0.0787266	0.403933	24	3	101453	0.478602	1	20.1831	6.63e-05	354721	0.161214	0.966167	22.0915	1.38076	275379	120612	0.437985	244617	289985	375941	508341	317324	332310	331001	318009	170791	82837	139593	225814	175323	300352	157022	533197	281404	619372	0.454337	2.20101
2597	unkown3524	1	1	18	12	8301.79	0.98982	1	20	12	116030	0.999948	1	19	12.0333	107426	8443.39	0.0785972	108175	114475	95811	86377	125677	84263	117343	88177	98201	115293	126995	123632	115806	90854	95789	115991	106429	233148	0.456486	2.19065
1382	unkown216	0.301037	0.811038	18	6	270677	0.926301	1	28	6.00002	1311796	0.634966	1	23	6.29763	1.17039e+06	44536.7	0.0380527	1007312	604304	630354	771394	1786463	1439000	991095	1030626	973599	551817	752621	1122035	2080592	1797990	1596463	1566097	1.16886e+06	2.5589e+06	0.456781	2.18923
3873	unkown55	0.380147	0.919777	18	6	369880	0.999224	1	28	5.99999	1.97936e+06	0.747539	1	23	6.29761	1.62882e+06	189083	0.116086	1366461	763475	822911	973927	3354646	1955800	1221693	1385288	1476868	625045	925213	1438278	2678495	2696458	2280059	1992223	1.6223e+06	3.52928e+06	0.45967	2.17547
824	unkown1427	0.0579045	0.352905	24	3	108905	0.173305	1	20	6.00001	387985	0.0562135	0.535989	22	4.675	278252	127804	0.459311	256017	225918	344395	448878	347062	585168	276735	342975	191714	68523	142237	182840	233827	279714	174590	288675	274329	592837	0.46274	2.16104
2588	unkown3512	0.105571	0.468626	24	15	14198.7	0.391538	1	27.3065	17.9999	150849	0.17303	1	25.6533	16.4717	140253	5635.03	0.0401776	109846	119751	129198	146697	130096	120851	137221	143702	136706	150858	171138	142853	140301	174212	140962	147923	140145	302208	0.463736	2.1564
733	unkown1295	0.182589	0.628607	18	6	77444.1	0.977569	1	20	6.00001	310106	0.486074	1	19	6.01667	255162	46573.1	0.182523	211339	271569	249377	251310	213646	405152	382512	239113	131011	60563	148632	187237	164571	262732	140302	673230	249518	537466	0.46425	2.15401
334	PI 30:0|PI 14:0_16:0	1	1	18	12	116430	0.996256	1	20	12	1.77389e+06	0.999993	1	19	12.0333	1.59576e+06	188898	0.118375	1665601	1538076	1507810	1333039	1896387	1618918	1244130	1320373	2334407	1293704	1343218	2124230	1522166	1593339	1465980	1373698	1.57344e+06	3.37341e+06	0.466425	2.14397
2599	unkown3526	0.719948	1	24	12	8395.83	0.989941	1	24.4321	12	54466.2	0.95409	1	24.2161	12.001	44052.3	11409.6	0.259	69586	26175	21744	14666	68986	49851	37434	27053	64445	31858	69834	51728	45190	73365	32942	21277	44133.4	94404.9	0.46749	2.13908
393	ST 27:1;O;S	0.235786	0.712255	18	6	926131	0.999939	1	28	6.00001	5224839	0.576437	1	23	6.29762	4.38996e+06	226842	0.0516729	3484740	2272049	2144464	4650785	8994008	5139418	3096611	3669319	3499151	1666858	2386085	3696441	6853523	7483440	6107380	4970016	4382143	9.34526e+06	0.468916	2.13258
3513	unkown494	0.380147	0.919777	18	0	37246.5	0.97698	1	28	12	240477	0.739259	1	23	4.92857	238840	102693	0.429966	375099	219224	489924	234708	90264	206711	183774	231763	186943	248613	234235	292117	225953	140115	241477	254392	240957	511987	0.470631	2.1248
755	unkown1332	0.587657	1	24	6	442392	0.656417	1	20	6.00001	1.83454e+06	0.753201	1	22	6.05	1.45614e+06	188845	0.129689	1425395	1370220	1575370	2037250	1240568	2237148	2160135	1700308	1157570	515683	1017575	1434676	780305	1446138	713801	2298708	1.44443e+06	3.04691e+06	0.474063	2.10942
723	unkown1275	0.873774	1	18	6	59596	0.997382	1	20	6.00001	346437	0.991364	1	19	6.01667	302401	35439.5	0.117193	219547	308318	314605	359146	269940	440573	395454	279780	214542	72173	173591	324400	205790	326596	143714	721542	298107	628648	0.474204	2.1088
2796	unkown3787	1	1	18	0	3528.11	0.921538	1	28	12	22554.2	0.996838	1	23	4.92856	31382.8	22919.3	0.730316	7880	14400	95911	133226	27564	14163	13937	32599	19620	32920	16489	21188	17915	10386	31684	19803	31855.3	66723.9	0.47742	2.09459
71	FA 18:3 (linolenic acid)	0.719948	1	18	6	51211.5	0.995922	1	28	6	482620	0.955535	1	23	6.29762	439530	27360.7	0.0622499	413582	324421	293257	331589	669787	493530	391912	375253	430353	292885	375827	415607	668386	514705	529174	497137	438588	917859	0.477838	2.09276
2973	unkown4058	0.139706	0.540373	18	6	64918.6	0.613733	1	20	6	300134	0.296361	1	19	6.01667	260911	28506.5	0.109258	245940	155469	247541	421478	312933	379834	229281	278489	215535	83476	116247	193757	364631	323574	243471	307646	257456	536952	0.479477	2.0856
1010	unkown1665	1	1	18	9	79273.7	0.652428	1	28	6.00002	330214	0.93105	1	23	8.2143	297142	20306.8	0.0683403	238889	164178	157253	173161	409412	353758	275173	282512	236700	259622	291426	345930	484423	367492	327745	371806	296218	616371	0.480583	2.08081
775	unkown1360	0.380147	0.919777	18	6	117866	0.999999	1	20	6.00001	435228	0.747824	1	19	6.01667	340530	111043	0.32609	246273	371917	88479	205909	258451	558773	575876	347814	206604	72224	184759	332972	191796	364475	181749	1045105	327074	680211	0.480841	2.07969
667	unkown1214	0.301037	0.811038	18	3	42697.6	0.798952	1	28	5.99999	535762	0.583241	1	23	4.38095	511859	135050	0.263842	482729	344302	345922	238194	685424	542304	442626	472693	524992	284729	260217	430680	901925	894076	703487	604840	509946	1060108	0.481032	2.07886
760	unkown1340	0.235786	0.712255	18	6	274099	0.999974	1	20	6	974419	0.576449	1	19	6.01667	748474	249278	0.333049	596502	907515	213306	431445	593348	1233657	1273879	796792	481449	194684	370183	647854	431541	696653	384538	2238922	718267	1.48876e+06	0.482458	2.07272
3833	unkown5452	0.587657	1	24	3	8498.54	0.726744	1	28	12	154412	0.79043	1	26	7.19643	161239	12395.7	0.0768779	196907	190787	166820	172261	153437	142125	143751	169543	142644	167716	170413	136876	173775	140498	165790	130264	160225	331858	0.482813	2.0712
388	SPB 14:0;2O	0.0787266	0.403933	24	3	182621	0.376412	1	20.464	6.00001	1373930	0.13391	0.872531	22.232	4.64869	1.22352e+06	166917	0.136424	1432119	1310915	1327153	1070539	1183327	1605799	1381097	1325497	1027683	984944	984589	1289799	1066102	1100627	1052873	1359560	1.21891e+06	2.52216e+06	0.483283	2.06918
2965	unkown4028	0.182589	0.628607	24	3	29866.1	0.352871	1	20.1831	5.99999	92768.8	0.241109	1	22.0915	4.66439	68218.2	26923.8	0.394672	40428	67399	102711	119958	40749	112514	122600	95212	47245	9356	39072	46747	57617	64780	34181	78227	67424.8	139184	0.48443	2.06428
624	unkown1174	0.139706	0.540373	18	6	175565	0.962074	1	28	5.99999	843956	0.404148	1	23	6.29762	763135	15820.5	0.0207309	684743	501034	478044	453228	1157318	910194	518385	789926	661170	440957	432447	713702	1417576	918543	996199	1127978	762590	1.54943e+06	0.492175	2.0318
737	unkown1300	0.301037	0.811038	18	6	38982.8	0.559258	1	20	6	171928	0.468314	1	19	6.01667	134534	30392.9	0.225913	158476	143935	92223	160238	121422	214487	191442	160362	132724	24041	58308	135319	103614	189176	77189	130653	130851	264988	0.493798	2.02512
1118	unkown1819	0.105571	0.468626	18	15	35534.9	0.853619	1	20	12	162404	0.306997	1	19	13.6167	147250	37692.6	0.255978	169856	148999	167714	204229	93655	138640	107278	109388	166392	134875	148813	199537	130236	117441	141736	171364	146885	297255	0.494136	2.02373
4382	unkown81	0.0787266	0.403933	24	3	140613	0.662518	1	20	7.91e-05	677770	0.206205	1	22	1.37504	567040	178758	0.315247	464507	586037	752166	908369	603362	751826	644897	584893	421302	241063	342675	539525	419929	549427	406329	1008347	576541	1.16633e+06	0.49432	2.02298
823	unkown1425	0.587657	1	24	3	342307	0.686442	1	22.7907	6.63e-05	1.82028e+06	0.769611	1	23.3953	1.46224	1.50049e+06	336747	0.224425	1244615	1316349	2098234	2621914	1161969	2169328	1736437	1902261	1237825	521489	1445394	1351586	1258744	1291638	910185	1806176	1504634	3.02346e+06	0.497652	2.00943
729	unkown1285	0.475047	1	18	6	308591	0.608266	1	20	6.00001	1.83454e+06	0.647688	1	19	6.01667	1.50414e+06	248488	0.165203	1425395	1370220	1575370	2037250	1240568	2237148	2160135	1700308	1157570	515683	1017575	1434676	1049824	1446138	917817	2298708	1.47402e+06	2.9619e+06	0.497662	2.0094
3176	unkown443	0.380147	0.919777	18	0	67183.6	0.573122	1	28	12	122666	0.549874	1	23	4.92857	156406	112130	0.716913	142985	203712	334040	511824	88118	47018	131182	158679	61881	146547	171950	110287	90524	69987	153018	117737	158718	318772	0.497904	2.00842
2972	unkown4057	0.719948	1	24	3	96895.5	0.979165	1	20.464	6.62e-05	596920	0.95142	1	22.232	1.38954	517162	123758	0.239302	612452	608933	567821	598474	177385	697380	645942	605002	448737	210799	421917	554068	551528	346156	480535	836919	522753	1.04563e+06	0.499942	2.00023
954	unkown1594	0.873774	1	18	6	14136.8	0.826331	1	28	5.99999	107183	0.957186	1	23	6.29762	100260	6608.41	0.065913	88475	86097	68355	64246	122369	110731	96848	98785	105664	67649	92356	104364	123748	135040	114755	121029	100032	199998	0.500165	1.99934
3012	unkown4156	0.0787266	0.403933	18	6	267180	0.998383	1	20	6.00001	844198	0.278508	1	19	6.01667	646697	216699	0.335087	508247	801413	228024	344940	600035	1069949	955435	751375	427987	198838	386801	548214	474748	640124	492904	1497961	620437	1.24021e+06	0.500267	1.99893
951	unkown1591	0.475047	1	24	15	17550.4	0.885825	1	28	17.9999	111220	0.785051	1	26	16.4821	98123.4	23075.1	0.235164	85686	57595	59393	78475	146054	114624	80131	77061	153630	66217	80551	133510	116117	136448	89082	103233	98612.9	196504	0.501836	1.99268
4384	unkown811	0.0787266	0.403933	24	12	31361.2	0.586603	1	24.0327	12	105750	0.188197	1	24.0163	12	68723.1	43608.1	0.634548	33321	6007	33145	54979	58985	129067	48139	78177	121958	187006	98444	15590	48010	34330	80068	72717	68746.4	135917	0.505798	1.97707
54	DG 36:3	0.719948	1	24	21	18122.1	0.78554	1	20	17.9999	240697	0.887888	1	22	19.525	223898	20047.2	0.0895371	241001	260310	201951	252412	178771	208604	238688	145533	232962	266261	196120	226590	246067	291617	202879	222224	225749	444846	0.507477	1.97053
74	FA 20:1 (eicosenoic acid)	0.719948	1	18	6	17211.9	0.975456	1	28	6	158304	0.950481	1	23	6.29762	142867	11566.4	0.0809591	96269	101990	110217	116684	218437	157723	136765	120293	129053	116309	120528	131062	182876	202280	172180	166838	142469	278356	0.511822	1.9538
3694	unkown5257	0.380147	0.919777	24	15	15547.5	0.624072	1	27.6489	12	114479	0.578552	1	25.8245	13.6742	96856.4	22068.2	0.227845	28491	116183	47034	72400	94281	102641	93734	124554	115653	146610	114443	81209	107718	71063	135599	110331	97621.5	190641	0.51207	1.95286
1008	unkown1663	0.301037	0.811038	18	9	28927	0.792873	1	28	5.99999	128038	0.580627	1	23	8.21428	111520	11305.6	0.101377	92244	76923	52650	66126	149899	150936	110596	100721	104011	93084	99489	132591	161683	132447	124222	128469	111006	216722	0.512202	1.95235
1082	unkown1774	0.139706	0.540373	18	6	219299	0.99989	1	28	5.99999	920097	0.414648	1	23	6.29761	718804	124035	0.172558	557933	326000	332597	410973	1476405	918325	594540	691118	610240	268768	378932	640766	1224672	1145471	999467	856286	714531	1.39309e+06	0.512911	1.94966
2960	unkown4012	0.301037	0.811038	24	6	441933	0.673642	1	20	6	2.54307e+06	0.526361	1	22	6.05	1.97802e+06	331933	0.167811	1851180	1890469	1880011	2272072	1432795	3086400	2914190	2738877	1348723	734447	1476923	1849754	1305778	1791233	1468125	3277907	1.95743e+06	3.81092e+06	0.513637	1.9469
1080	unkown1770	0.139706	0.540373	18	6	193748	0.998991	1	28	5.99999	867982	0.414401	1	23	6.29761	694009	99153.9	0.142871	533175	307433	354587	356551	1436144	836539	569158	630085	567996	297503	355616	599607	1164435	1177045	966963	896657	690593	1.34313e+06	0.514167	1.94489
1222	unkown1963	1	1	18	6	7094.58	1	1	20	6	162796	1	1	19	6.01667	156561	7517.93	0.0480192	142732	139145	177569	134312	216304	149281	161384	124214	174209	160023	140917	113943	208530	134184	144614	169040	155650	302645	0.514299	1.94439
3081	unkown4303	0.105571	0.468626	18	3	12312.1	0.822523	1	28	6	73046.2	0.299036	1	23	4.38095	67146.3	25633.1	0.38175	58723	35501	41531	30555	68882	90997	56768	75538	56862	21337	22025	54921	141094	97908	122430	93460	66783.2	129197	0.516911	1.93457
1078	unkown1767	0.105571	0.468626	18	6	600429	0.99965	1	28	6.00002	3.00278e+06	0.34285	1	23	6.29763	2.35171e+06	395334	0.168105	1675171	1004284	1251122	1200215	4904611	3098740	1952135	2055637	1887820	989488	1225976	2021263	4004692	4010669	3224054	2903531	2338088	4.51474e+06	0.517878	1.93096
392	SPB 18:0;2O	0.587657	1	18	6	16838.5	0.953877	1	20	6	389769	0.885018	1	19	6.01667	374511	12781.7	0.0341291	377528	361518	410198	345448	377187	399034	429466	353389	315613	317619	360894	397015	366545	389370	363389	403180	372962	718863	0.518822	1.92744
873	unkown1489	1	1	18	9	19127.6	0.998175	1	20	6	142856	0.999998	1	19	7.6	127127	16030.4	0.126097	110264	108217	90844	139058	195947	138060	136969	100448	148353	85462	127453	140279	109745	149260	150782	52478	123976	238869	0.519013	1.92673
3064	unkown4267	0.0787266	0.403933	18	0	60909.8	0.581811	1	28	12	218851	0.187035	1	23	4.92857	234385	68449	0.292036	283163	266234	344122	335801	113602	206794	235721	240652	247987	155938	220144	251336	229349	186438	199630	255835	235797	453849	0.519548	1.92475
4144	unkown5859	1	1	24	18	11073.6	0.999998	1	20.9501	12	98206.2	1	1	22.4751	14.8649	86922	10308.2	0.118591	93233	73909	55429	95304	121274	79026	53532	76453	138606	68483	86878	98858	91713	135028	15281	108551	86972.4	166727	0.521645	1.91701
726	unkown1281	1	1	18	6	14473.4	1	1	28	6	175854	1	1	23	6.29762	166996	3385.99	0.0202758	177206	159835	128251	138108	199438	197815	157585	148579	181130	98012	152625	173482	168255	258714	156946	174096	166880	319428	0.522434	1.91412
3237	unkown452	0.0787266	0.403933	18	0	77245.8	0.872875	1	20	12	229144	0.252729	1	19	15.2	188033	119515	0.635606	210302	342414	388688	244788	29575	163234	27095	154803	267110	306480	193864	149121	164130	102329	242450	215975	200147	381431	0.524728	1.90575
3810	unkown5425	0.105571	0.468626	24	6	40987.4	0.174453	1	28	4.17e-05	659453	0.0919838	0.712795	26	3.25002	611542	1884.66	0.00308182	641159	706622	673626	616405	594370	660853	599341	646268	607754	563259	612507	568469	593778	560636	533335	606775	611572	1.16511e+06	0.524904	1.90511
620	unkown1170	0.873774	1	18	6	28634.5	0.984972	1	28	6	297766	0.989805	1	23	6.29762	282165	8263.72	0.0292868	242676	223601	220017	241450	416179	295752	215040	264095	285862	217797	222192	282992	379721	360938	305846	335929	281880	535131	0.52675	1.89843
70	FA 18:2;O	0.587657	1	24	18	142981	0.976361	1	28	6.00002	679965	0.892512	1	26	25.5357	598888	30912	0.0516156	446086	361760	377405	367293	1149476	609352	419518	541515	677414	401874	560958	589420	815053	812815	734132	688840	597057	1.13251e+06	0.527198	1.89682
1006	unkown1661	0.105571	0.468626	24	15	28107.8	0.415866	1	28	18	128268	0.181135	1	26	16.4821	106033	29408.9	0.277355	86543	48750	53217	71973	144121	124187	86524	94305	142081	88424	78569	174752	134824	125242	126721	126284	106657	201538	0.529216	1.88959
750	unkown1325	1	1	24	6	41034.1	0.999297	1	24.4321	6.63e-05	704270	1	1	24.2161	3.02704	669062	36708.5	0.0548656	801958	609704	698755	706665	752734	811524	539471	655496	696206	501402	609549	735638	647273	754854	572989	610901	669070	1.26078e+06	0.530679	1.88438
4370	unkown782	1	1	18	15	10268.4	0.999971	1	28	6.63e-05	225851	1	1	23	21.0834	213498	15267.5	0.0715111	131896	262159	267639	241712	239387	249241	186068	224396	132875	252125	239481	264490	233359	254766	211311	13824	212796	399788	0.532271	1.87874
204	PC O-32:1	1	1	18	9	7188.8	0.999843	1	24.4321	12	42021.8	1	1	21.2161	10.5142	38510	4345.13	0.112831	23287	26065	22423	61867	47403	30811	35154	47461	37377	36970	45274	48466	49382	19967	37800	38368	38004.7	71185	0.533886	1.87306
2733	unkown3701	0.587657	1	24	21	14372.8	0.956885	1	20	17.9999	73492.2	0.886039	1	22	19.525	64827	14441.7	0.222772	56631	82076	121767	56914	34898	71283	47997	31184	53399	46827	78163	83461	109539	30181	66646	87603	66160.6	123669	0.534983	1.86922
4234	unkown5957	0.873774	1	24	18	8941.37	0.878015	1	28	6	33644.2	0.97051	1	26	25.5357	32832.6	4273.86	0.130171	26470	17936	17782	21549	52395	37608	12358	32216	36029	15289	27422	43225	45544	54040	47900	33508	32579.4	60531.2	0.538225	1.85796
771	unkown1356	0.475047	1	18	6	589190	1	1	20	6	2.03243e+06	0.828644	1	19	6.01667	1.65968e+06	444708	0.267949	1283733	2087738	459157	944602	1433697	2632543	2416393	1647102	1502170	440523	804116	1745184	1069388	1750341	868850	4607041	1.60579e+06	2.97634e+06	0.539518	1.85351
2471	unkown3395	0.380147	0.919777	18	0	9653.95	0.940513	1	20	17.9999	84267.7	0.725266	1	19	18.05	78792.6	8346.81	0.105934	98290	60733	89134	105710	76689	55770	62820	70066	83378	102392	63226	84420	108705	87203	63475	77688	80606.2	149096	0.540633	1.84968
3860	unkown5485	1	1	18	12	10165.4	0.989582	1	20	12	64086.2	0.999946	1	19	12.0333	54111.6	9089.29	0.167973	43468	59164	45491	45417	77516	64928	17834	26527	72230	51262	79206	53647	74614	39807	53952	43542	53037.8	97400.5	0.544533	1.83644
3305	unkown46	0.380147	0.919777	18	6	136517	0.995267	1	20	6	509362	0.74608	1	19	6.01667	393250	130962	0.333024	395531	401490	119300	225876	309224	655161	550760	522303	363759	135794	247572	430234	303676	402074	290983	684347	377380	685738	0.550327	1.8171
1633	unkown249	0.0579045	0.352905	18	6	466408	0.971064	1	28	6	2075600	0.218074	1	23	6.29762	1.81017e+06	43283.5	0.0239113	1609770	987883	1050855	1220522	2790101	2115050	1598966	1798283	1480582	815402	961154	1496123	3441454	2580990	2575943	2415842	1.80868e+06	3.28063e+06	0.551322	1.81382
1260	unkown2005	0.0579045	0.352905	18	15	20344.5	0.537189	1	20	12	99686	0.139054	0.88955	19	13.6167	75524.3	29113.8	0.38549	56460	93575	57611	87993	42403	65382	82512	29039	94353	75213	100179	128999	75840	92751	48540	73028	75242.4	136341	0.55187	1.81202
2433	unkown3357	1	1	18	0	24532.4	0.99899	1	25.2722	6.95e-05	561137	0.999999	1	21.6361	2.98e-05	532342	17409.5	0.0327035	497016	604232	566219	577081	454086	637526	531066	517781	403119	543012	541082	556136	529958	498921	519424	567273	533996	966754	0.552359	1.81042
819	unkown1419	1	1	24	6	51682.4	0.853289	1	20	6.00001	285924	0.988669	1	22	6.05	235140	22433.4	0.0954047	303804	174611	232400	300153	322983	293850	289872	236991	302737	40794	92091	242785	218190	339116	134219	215374	233748	422984	0.552616	1.80957
600	unkown1149	0.182589	0.628607	24	21	11359.3	0.708808	1	28	17.9999	202060	0.394045	1	26	19.7321	172169	12903.9	0.074949	175158	150921	150123	155459	216121	147036	139414	145497	204935	134039	148288	163580	206682	206503	198510	196544	171176	309664	0.552779	1.80904
3182	unkown444	1	1	18	12	59801.8	0.937294	1	20.9501	12	302529	0.997992	1	19.4751	12.0692	247491	48426.1	0.195668	222953	177310	133532	277305	83765	243954	220466	308685	413098	190128	299752	307139	345304	172550	164380	313518	242115	437400	0.553531	1.80658
878	unkown1495	0.719948	1	18	6	95299.3	0.979317	1	20	5.99999	343950	0.951458	1	19	6.01666	258317	94869.8	0.367261	236853	330693	43101	139648	240926	466496	420458	247922	269218	101139	151336	286714	138800	298510	217421	359900	246821	445404	0.554151	1.80456
3001	unkown4131	0.105571	0.468626	18	3	37757.7	0.454154	1	24.2975	17.9999	553783	0.193589	1	21.1488	20.1704	394167	133320	0.338231	351878	608933	418710	510355	115038	354346	337981	327284	277079	210799	302416	554068	551528	346156	480535	836919	411502	742212	0.554426	1.80367
970	unkown1614	0.0787266	0.403933	18	9	55360.1	0.97264	1	20	6	196228	0.273327	1	19	7.6	146828	45834.4	0.312163	92717	145964	5362	48813	176643	252281	218299	137687	141411	67510	133060	169054	133985	128242	126590	227473	137818	248467	0.554673	1.80286
3414	unkown4808	0.873774	1	24	3	31456	0.865991	1	20	6	416908	0.967654	1	22	4.675	387692	34618.1	0.089293	495479	312678	431798	404606	369854	410472	403004	484301	386281	222683	414066	272411	307047	422583	381486	467316	386629	695902	0.555579	1.79992
4404	unkown84	0.301037	0.811038	18	6	1.11344e+06	1	1	20	6	3.88709e+06	0.662439	1	19	6.01667	3.14925e+06	864086	0.274379	2705806	3728822	966125	1741571	2672147	4811396	4634730	3430094	2367042	1023265	1691580	3310993	1961628	2899048	1901600	8866744	3.04454e+06	5.4791e+06	0.555664	1.79965
778	unkown1366	0.182589	0.628607	18	6	1.7647e+07	0.963642	1	20	6	60559056	0.481673	1	19	6.01667	4.42409e+07	1.75447e+07	0.396572	39632040	45311720	14469937	28403445	34168756	80245022	69631236	58191210	37413956	12662940	25345183	41814446	28993895	49718573	26446428	81387993	4.21148e+07	7.56646e+07	0.556599	1.79663
984	unkown1633	0.0787266	0.403933	18	6	26132.9	0.999994	1	20	6	110144	0.278831	1	19	6.01666	92795.8	21927.6	0.2363	74961	40085	59306	94748	103257	120577	115886	100856	90460	25379	100203	67049	135803	92235	130721	90692	90138.6	161784	0.557155	1.79483
969	unkown1613	0.139706	0.540373	18	9	87651.4	0.894138	1	28	5.99999	297962	0.384757	1	23	8.21428	230588	58521.4	0.253792	174422	210975	36015	90737	303263	346323	316000	226260	286369	151544	194703	306968	207158	204565	206613	384881	227925	407072	0.559912	1.78599
4466	unkown939	1	1	18	15	236697	0.997675	1	20	17.9999	3.96398e+06	0.999997	1	19	16.4666	3.77946e+06	313558	0.0829637	3808219	2885669	5077074	4385517	3916908	3864208	3491948	2609164	4414418	3353403	3997165	3673991	3767178	4283143	3670829	4134768	3.83335e+06	6.81774e+06	0.562261	1.77853
856	unkown1468	0.182589	0.628607	18	0	28798.3	0.807974	1	23.0287	4.27e-05	146863	0.429856	1	20.5144	1.9e-05	123383	17619.6	0.142804	152383	119312	160277	155479	196710	94771	107060	104537	83233	108073	108015	110745	152315	146725	123127	93179	125996	223722	0.563182	1.77562
780	unkown1368	0.182589	0.628607	18	6	161643	0.949626	1	20	6	466616	0.477208	1	19	6.01667	320705	151322	0.471841	336430	347745	36033	188744	212202	639810	573514	440939	247855	24052	153202	246944	199641	406123	143101	641555	302368	535974	0.564147	1.77259
2646	unkown3582	0.139706	0.540373	24	15	132909	0.73329	1	24.4321	12	1145581	0.335859	1	24.2161	13.5145	992930	181295	0.182586	855992	818928	552449	1112168	1317649	1009755	867349	684323	1259005	1060862	1011030	1251427	1166909	988196	1051170	890921	993633	1.75702e+06	0.565523	1.76827
610	unkown116	0.139706	0.540373	18	6	154730	1	1	20	6	550140	0.414678	1	19	6.01667	444119	127714	0.287568	364635	477746	111917	271667	427366	653555	645884	473755	317915	181259	231945	414320	345491	459548	253176	1228099	428642	755739	0.567183	1.7631
2645	unkown3581	0.301037	0.811038	24	15	138044	0.704511	1	21.8859	12	1127233	0.540978	1	22.9429	13.4595	945898	227821	0.240851	788590	841371	505888	1054911	1314367	895463	770459	726983	1180094	1046999	989489	1292350	1118598	794909	918587	833842	942056	1.65643e+06	0.568727	1.75831
4442	unkown90	0.587657	1	18	6	695167	1	1	20	6	2.69776e+06	0.900063	1	19	6.01667	2.24505e+06	538260	0.239755	1836294	3106499	648214	1213784	2031087	3503877	3061739	2194319	2184291	707156	1180740	2689023	1264086	1982107	1318491	5955425	2.17982e+06	3.83269e+06	0.568745	1.75826
2974	unkown4059	0.139706	0.540373	24	3	96141.8	0.868939	1	25.8651	6.63e-05	769245	0.377384	1	24.9326	1.55832	646682	112083	0.17332	781088	803046	740362	752486	307124	705891	735986	705591	610224	389505	514205	720426	637576	466021	584108	870301	645246	1.13325e+06	0.569376	1.75631
2616	unkown3542	1	1	24	0	5649.25	0.999999	1	28	6.00001	68934.8	1	1	26	2.78572	69268.5	11391.9	0.164461	52324	42231	67981	95068	107336	72757	50675	44971	74430	42028	48480	89350	64326	93866	78901	84707	69339.4	121677	0.569863	1.75481
55	DG 36:4 Isomer A	0.301037	0.811038	18	6	22865.7	0.999997	1	28	5.99999	194127	0.662438	1	23	6.29762	175096	14234	0.0812923	121016	134355	162264	167843	156915	224087	229810	165695	132533	141671	198298	156715	190542	169782	199029	243136	174606	306074	0.570468	1.75295
862	unkown1475	0.301037	0.811038	18	6	889737	0.99998	1	20	6	2876342	0.662432	1	19	6.01667	2.21404e+06	745860	0.336877	1859767	2655103	601740	1135033	1923040	3655364	3398117	2528847	1507650	690379	1231795	2149522	1328826	1819811	1366343	6127244	2.12366e+06	3.70705e+06	0.572871	1.74559
3713	unkown5280	0.139706	0.540373	18	12	35910.9	0.892839	1	20	12	329677	0.384379	1	19	12.0333	289981	48241.1	0.166359	297366	323126	258311	218262	263799	243023	359279	282002	278220	360902	346181	333406	254677	166899	240463	322603	284282	495029	0.574275	1.74133
927	unkown1557	0.139706	0.540373	24	3	53256.8	0.395809	1	20.1831	6.63e-05	329997	0.215384	1	22.0915	1.38076	279688	75529.2	0.270048	264819	227386	369619	458164	245198	370689	350716	339962	243530	89029	200077	258029	272506	294676	255972	294999	283461	491480	0.576749	1.73386
3931	unkown5573	1	1	24	12	9134.76	0.999775	1	20	12	97879	1	1	22	12.1	89275.5	10714.4	0.120015	67866	85131	127061	62544	78988	104214	68633	105999	95331	118633	93685	83867	83288	68481	84724	89850	88643.4	153059	0.579146	1.72668
3151	unkown44	0.182589	0.628607	18	6	1.0647e+06	0.940153	1	20	6	4.1131e+06	0.474168	1	19	6.01667	3.11464e+06	1.08941e+06	0.349771	2976539	3217883	1239192	1884047	2602106	5300679	4459811	4089814	3000268	1188186	2053283	3119193	2214661	3272670	2226246	4877469	2.98263e+06	5.13925e+06	0.580363	1.72306
2934	unkown3953	0.475047	1	24	3	13385.2	0.979469	1	21.8859	5.03e-05	147387	0.821284	1	22.9429	1.43396	135773	13559.8	0.0998707	186966	122595	144448	135541	119566	176044	160760	123615	103668	105875	131468	143561	116609	119987	108677	178127	136094	234032	0.581519	1.71963
875	unkown1490	0.587657	1	18	9	77992.8	0.962153	1	20	6	370169	0.887813	1	19	7.6	280162	79112.7	0.282383	257396	327816	57502	164454	335991	486827	312294	345563	414604	76422	93720	415615	163814	329983	122910	328845	264610	454690	0.581957	1.71834
4207	unkown5921	1	1	24	0	7908.28	0.999978	1	26.9725	6.63e-05	104548	1	1	25.4862	3.13e-05	106469	15414.3	0.144777	133769	88498	87687	108240	86151	134061	104375	87931	108981	115030	79417	82831	154591	107117	68958	145813	105841	181529	0.583051	1.71512
772	unkown1357	1	1	18	3	45592.1	0.999931	1	20	6	253126	1	1	19	4.43333	230058	57340.5	0.249244	199259	356220	244038	124316	214951	299881	300052	197618	210864	69934	136432	259090	149333	227292	153913	525521	229295	392842	0.583682	1.71326
3425	unkown483	0.587657	1	18	0	187053	0.998481	1	24.1644	17.9999	1.38475e+06	0.899587	1	21.0822	18.3931	1.29749e+06	133488	0.102882	1594161	797185	1666499	1690716	705319	1159521	1422574	1528502	1065042	1186959	1118688	1557449	1265558	1362259	1470349	1440850	1.31448e+06	2.25071e+06	0.584028	1.71225
3220	unkown45	0.182589	0.628607	18	6	2.46375e+07	0.9345	1	20	6	92246928	0.472346	1	19	6.01667	6.98818e+07	2.44809e+07	0.350319	67412422	71224950	26165499	43093138	60841804	117308047	96786017	94051844	66347205	26901583	45009003	70783749	50708944	77093228	50096004	106820042	6.69152e+07	1.1441e+08	0.584871	1.70978
2766	unkown374	0.0579045	0.352905	18	15	38621.8	0.75857	1	20	12	106822	0.181201	1	19	13.6167	99639.8	34966.6	0.350931	105927	127879	155088	149874	44176	50726	72075	86240	110960	81309	107371	127646	85847	75413	101461	106826	99301.1	168528	0.589225	1.69714
2987	unkown4096	1	1	18	0	4675.04	0.998875	1	28	18	39572.2	0.999999	1	23	18.8928	40927.7	3651.97	0.0892299	45312	44662	45376	53405	25141	43193	46518	39171	54505	24701	29122	47912	32442	34618	41006	50223	41081.7	69697.4	0.589429	1.69656
868	unkown1483	0.0787266	0.403933	18	15	57282	0.999915	1	20	12	217345	0.278815	1	19	13.6167	175138	73890.5	0.421899	181143	163701	288919	234703	253901	99001	96545	64853	224497	178877	199585	266421	159973	123187	176391	79061	174422	295405	0.590451	1.69362
3079	unkown4301	0.139706	0.540373	18	3	18972.4	0.681656	1	28	6.00001	146581	0.319163	1	23	4.38095	145449	28927.6	0.198885	143979	98425	122950	68108	164584	166095	104447	151198	115584	84030	84695	126020	283524	213644	206353	186994	145039	245588	0.59058	1.69325
2791	unkown3777	0.475047	1	18	6	19517.7	0.992316	1	20.3695	6	56497.8	0.825913	1	19.1848	6.02297	43816.5	8625.82	0.196862	47094	4782	14794	134086	66755	38793	48738	71705	39405	17267	35464	16819	34951	36531	54693	22679	42784.8	72393.5	0.591003	1.69204
448	TG 54:2	1	1	18	12	22964.4	1	1	23.2718	12	511794	1	1	20.6359	12.199	492835	15079.5	0.0305975	554027	521606	388048	428098	600557	541457	445676	338127	627651	466485	566035	387006	561852	513341	432689	491721	491524	831300	0.591271	1.69127
447	TG 54:1	0.587657	1	24	15	23293	0.853276	1	28	17.9999	394407	0.847565	1	26	16.4821	375568	4021.34	0.0107073	349651	367146	334416	353338	381026	381095	378896	324699	427608	346338	452326	333563	399729	418128	379784	379986	375483	633358	0.592845	1.68678
782	unkown1371	0.719948	1	18	6	76661.2	0.99867	1	20	5.99999	246619	0.956191	1	19	6.01666	185450	70775.3	0.381642	156013	178332	34648	121544	135559	306968	296485	247463	173297	47631	129055	187614	127525	198728	117199	371909	176873	298298	0.592942	1.68651
3298	unkown459	1	1	24	18	30684.2	0.931944	1	24.0327	12	189163	0.99763	1	24.0163	15.0021	163170	33792.1	0.207098	169717	120305	124558	133706	70851	146113	187250	161208	289543	119660	227782	119666	215164	214684	146493	164019	163170	275003	0.593339	1.68538
64	FA 16:0 (palmitic acid)	0.105571	0.468626	18	9	594318	0.997296	1	28	6	3.1878e+06	0.342291	1	23	8.21429	2.68039e+06	278860	0.104037	2192631	1627666	1631898	2603276	3249414	3282518	3442711	2776556	2320960	1722936	3177324	2685208	3340197	3144649	2893046	2592245	2.6677e+06	4.46784e+06	0.59709	1.67479
4484	unkown963	0.301037	0.811038	18	15	61483.5	0.300298	1	20	12	455752	0.30768	1	19	13.6167	362290	99644	0.27504	335225	302545	366226	363190	336504	358213	286653	222478	558925	309491	486434	468158	341004	374771	330309	341070	361325	603044	0.599168	1.66898
4284	unkown6011	0.873774	1	18	6	18870.9	0.998857	1	20	5.99999	86916.5	0.99154	1	19	6.01666	73477.1	16989.1	0.231216	92931	25596	45299	59775	118196	87285	85068	57117	109147	63341	56986	51215	65564	82413	66104	76657	71418.4	119171	0.599293	1.66863
808	unkown1405	0.105571	0.468626	24	3	43968.6	0.293051	1	23.52	6.05e-05	205507	0.13847	0.888335	23.76	1.48503	169259	34420.2	0.203358	192988	187519	199548	241972	157125	217544	230652	195807	158517	64222	96429	204110	137336	179822	97813	149219	169414	282244	0.600239	1.666
3034	unkown4204	1	1	18	6	41812.8	0.999996	1	20	6	294872	1	1	19	6.01667	271414	21555.3	0.0794186	303351	305877	234626	211287	105848	362464	345108	366067	245074	144775	249663	290063	264830	206074	265547	400170	268802	446466	0.602065	1.66095
617	unkown1168	0.475047	1	18	3	11956.1	0.593845	1	28	6	772384	0.639101	1	23	4.38095	778262	102007	0.13107	722196	618095	562546	528314	973165	820550	614263	681559	672980	568639	590935	794615	1315612	945463	1021316	998822	776817	1.29008e+06	0.602144	1.66073
616	unkown1167	0.301037	0.811038	24	18	31229	0.89762	1	28	17.9999	426145	0.623804	1	26	18.1071	392258	14102	0.0359509	394790	338528	333501	417637	469248	328281	337586	366153	372238	359277	442019	400292	430761	436119	412224	425476	391508	650061	0.602264	1.6604
876	unkown1491	0.873774	1	18	6	91906.7	0.966242	1	20	6.00002	366282	0.987192	1	19	6.01667	276126	101537	0.367719	315855	190977	95537	189282	173032	521672	322240	448184	289443	115767	179629	334641	245482	292141	147259	359999	263821	437361	0.603211	1.65779
2982	unkown4082	0.235786	0.712255	18	6	78736	0.999435	1	20	6	256169	0.576265	1	19	6.01667	198352	73493.4	0.370521	175024	191942	41779	60838	163466	301041	302708	257462	168080	115359	165971	189108	192454	193718	159925	352256	189446	313810	0.603696	1.65646
2198	unkown31	0.0579045	0.352905	18	3	142874	0.0394319	1	20	6.63e-05	361898	0.0161706	0.273951	19	1.58336	255853	141007	0.551126	528012	315867	285804	317911	326611	325148	351128	280225	97611	83527	124778	91687	312339	350121	327629	357868	279767	463418	0.603703	1.65644
3710	unkown5278	1	1	18	6	6363.25	0.999558	1	28	17.9999	49829	1	1	23	11.2262	44273.5	3565.14	0.0805253	22507	28371	44505	40891	17251	47124	51887	55279	32911	38405	97408	30341	53747	72072	18963	54534	44137.2	73028.8	0.604381	1.65458
2617	unkown3543	1	1	24	18	10529.2	0.989241	1	28	17.9999	135927	0.999942	1	26	18.1071	121877	7577.01	0.0621696	112188	61172	147402	129368	146528	121174	106692	73354	136385	103316	114686	147608	150431	124579	140304	128394	121474	200337	0.606348	1.64922
773	unkown1359	0.235786	0.712255	18	6	898083	0.999996	1	20	6.00001	3242655	0.576456	1	19	6.01667	2.52484e+06	817079	0.323616	1779941	2990235	743042	1548513	2049451	4106227	4120873	2694069	1675763	627309	1289187	2374883	1429619	2501591	1333175	7549320	2.42582e+06	3.99708e+06	0.606899	1.64772
2658	unkown3597	0.0787266	0.403933	18	0	43219.6	0.816876	1	26.8085	17.9999	197074	0.240779	1	22.4043	18.7235	200043	48776.8	0.243832	278682	219705	359364	223298	56166	176157	203428	186824	227555	161874	213430	159049	217050	141505	234910	194833	203364	335036	0.606993	1.64747
567	unkown1116	0.0579045	0.352905	24	21	31447.5	0.420931	1	24.2975	17.9999	369276	0.114904	0.814808	24.1488	19.5099	329497	39949	0.121243	370230	327813	341326	324861	341594	289398	231708	305797	327098	238459	359312	333211	337686	396514	347759	395147	329245	542159	0.607284	1.64668
718	unkown127	0.182589	0.628607	18	6	81315.2	0.998717	1	28	6	553248	0.492686	1	23	6.29762	489813	12635.1	0.0257958	525029	254270	379905	338362	857955	527823	413522	413694	383781	307405	268902	456682	744322	702783	629431	626183	489378	803612	0.608973	1.64211
3033	unkown4203	1	1	18	0	5584.55	0.999794	1	27.8233	6.63e-05	337033	1	1	22.9117	2.73e-05	312084	12615.7	0.0404242	310680	284872	456368	296212	367277	311042	276263	287295	233708	323871	342892	293310	315861	274283	319655	307750	312584	510249	0.61261	1.63236
3057	unkown4244	0.139706	0.540373	18	6	14389.6	0.976925	1	20	6	121100	0.408296	1	19	6.01667	108543	13873.6	0.127816	118323	79334	98996	96128	116303	125204	142301	100593	122654	84954	94670	96234	104159	122880	97754	109302	106862	174363	0.612868	1.63167
2570	unkown3494	1	1	24	18	9805.45	0.999432	1	22.1053	17.9999	130130	1	1	23.0526	18.0304	121102	9650.09	0.079686	156110	90821	118510	126044	123991	92236	128549	97190	152813	85407	110964	139766	139221	150259	111150	119889	121432	198087	0.613027	1.63125
178	PC 35:1 Isomer B	0.182589	0.628607	18	15	95675.8	0.997489	1	20	12	1.48732e+06	0.492304	1	19	13.6167	1.40039e+06	124687	0.089037	1294908	1530071	1593957	1376336	1329337	1304280	1333748	1372516	1363611	1528885	1448023	1608755	1340539	1294905	1328322	1338793	1.39919e+06	2282189	0.61309	1.63108
352	PI 36:2	0.139706	0.540373	24	3	143844	0.673115	1	21.6708	7.61e-05	3.82104e+06	0.31635	1	22.8354	1.42725	3.67037e+06	183451	0.0499815	3731949	3993806	3803097	3755317	3457362	3523792	4246452	3902850	3540611	3182872	3595085	3587587	3740683	3614427	3410185	3718010	3.67526e+06	5.96594e+06	0.616039	1.62327
533	unkown108	0.380147	0.919777	18	6	52181.3	0.993048	1	28	5.99999	346804	0.745259	1	23	6.29761	313903	12975.8	0.0413371	307972	181724	209671	245331	467218	381054	256770	282176	306545	196990	190813	308772	495195	411823	341369	431876	313456	506923	0.61835	1.61721
2955	unkown4003	1	1	18	0	88590.4	0.98116	1	25.5652	17.9999	735410	0.999821	1	21.7826	18.5596	718262	88065.7	0.12261	827968	945519	897968	664163	326069	817655	691862	731765	697825	568753	698698	817161	689519	652379	697790	901954	726690	1.17065e+06	0.620756	1.61094
122	LPE 18:1	0.182589	0.628607	18	6	4.9738e+06	0.863582	1	20	6	17254655	0.448945	1	19	6.01667	1.24007e+07	5.21392e+06	0.420454	11312792	12212039	4775586	7061070	9335828	22447945	20083075	17151772	9688663	4783507	8226791	11070265	8854905	11843604	8784034	20669841	1.17689e+07	1.89345e+07	0.621557	1.60886
2734	unkown3702	1	1	18	12	9239.76	0.996159	1	20	12	61504.5	0.999993	1	19	12.0333	50601	11356.5	0.224432	67304	36782	61226	29259	11792	36773	58840	62285	77051	43874	57463	67630	50717	61617	24901	40637	49259.4	79160.3	0.622274	1.60701
444	TG 52:6	1	1	24	18	12113.8	0.99995	1	28	17.9999	161234	1	1	26	18.1071	150353	3131.46	0.0208274	162860	125219	136809	143588	192625	130627	128625	129255	186839	105692	143575	172333	171974	191867	134494	146603	150187	240495	0.62449	1.60131
136	LPI 16:1	0.0579045	0.352905	18	6	287003	0.971767	1	20	5.99999	1.60493e+06	0.218191	1	19	6.01666	1.39295e+06	256222	0.183942	1279058	1105388	1099347	1084361	1644426	1814236	1411108	1549936	1455432	1030499	1096793	1409998	1550768	1395911	1188483	1674619	1.3619e+06	2.17734e+06	0.625486	1.59876
3964	unkown5622	1	1	18	15	1720.92	1	1	20	12	54139.5	1	1	19	13.6167	47049.9	7771.38	0.165173	58057	32475	55602	45210	44587	27996	54811	50816	33002	55936	33419	94201	49197	22644	40547	53095	46974.7	75004.9	0.626288	1.59671
3035	unkown4207	0.873774	1	24	3	28377.8	0.978584	1	26.0177	6.63e-05	397603	0.988949	1	25.0088	1.56308	346631	43876.4	0.12658	403805	495253	384631	306724	169408	435613	354880	367284	326426	228518	334492	357087	331659	303391	329329	408084	346036	551836	0.627064	1.59473
1095	unkown1793	0.587657	1	18	12	4445.93	0.990254	1	28	12	230129	0.89699	1	23	12.5952	207550	33425.2	0.161046	207009	217460	238716	232176	152472	236847	232258	187513	227933	191501	219562	281519	153900	191202	175105	161803	206686	329191	0.62786	1.59271
738	unkown1301	0.235786	0.712255	24	6	83081.3	0.605294	1	20	6	463169	0.420577	1	22	6.05	395613	19035.8	0.0481172	407032	424482	427219	510301	324736	493692	574575	459673	310365	142147	302983	417207	294580	387513	269046	565366	394432	625688	0.630398	1.5863
3656	unkown5210	1	1	18	6	5316.21	1	1	28	6	114673	1	1	23	6.29762	112383	449.792	0.00400231	104796	113387	113456	100445	91267	116210	128666	122549	84806	118443	114336	112063	127565	109556	105342	134993	112368	177875	0.631721	1.58298
4353	unkown750	0.105571	0.468626	18	6	330977	0.871294	1	20	6	995640	0.311469	1	19	6.01667	816539	173814	0.212867	1328866	360162	444809	672423	1383995	1139328	555675	903563	429710	420482	164371	450969	1083316	1193300	1149360	1047286	795476	1.25877e+06	0.631947	1.58241
2980	unkown4080	0.235786	0.712255	18	6	90667.2	0.983676	1	20	6	294462	0.570865	1	19	6.01667	215661	85376.3	0.395882	184417	224287	85096	117136	149565	359190	360345	308748	158321	70351	139652	173167	148201	197774	156197	452590	205315	324719	0.632285	1.58156
6	CAR 18:0	0.105571	0.468626	18	9	91273.2	0.890692	1	26.8085	5.99999	950484	0.316333	1	22.4043	8.1082	869737	75056.1	0.0862975	720817	699694	764266	830513	922788	883020	1170712	825415	913391	857230	936069	805332	967125	892103	795834	844900	864326	1.36634e+06	0.632582	1.58082
777	unkown1362	0.475047	1	18	6	39924.1	0.997415	1	20	5.99999	343699	0.827729	1	19	6.01666	310694	37404.2	0.120389	276910	298133	220589	324335	340960	330635	369922	333278	254878	202451	345918	340493	291379	366653	275507	326545	306162	482937	0.633957	1.57739
123	LPE 18:2	0.235786	0.712255	18	6	3.58955e+06	0.957759	1	20	6	12342117	0.561854	1	19	6.01667	8.99128e+06	3.57701e+06	0.397831	7585348	9982006	3340178	5324060	6301027	15579278	15033407	12454756	6792220	2952570	5827939	8118722	6272556	8372496	5870798	17117771	8.55782e+06	1.34732e+07	0.635174	1.57437
869	unkown1484	0.719948	1	18	15	37438.8	0.999798	1	28	12	318915	0.956458	1	23	14.5119	304145	66766.2	0.219521	315227	261609	458082	400246	403461	242571	235679	238592	289517	318289	325893	341962	333362	249120	290859	158618	303943	477484	0.636551	1.57097
538	unkown1085	0.380147	0.919777	18	3	8812.67	0.899954	1	28	6	389030	0.709071	1	23	4.38095	399752	16917.5	0.0423199	388723	340494	374713	330638	531316	424741	274558	325506	460181	279776	289696	398994	543293	506052	460158	463358	399512	627200	0.636977	1.56992
3038	unkown4213	0.380147	0.919777	18	6	135801	0.884192	1	20	6	539678	0.702591	1	19	6.01667	390738	161081	0.412247	331668	394824	159812	229766	269070	692669	663844	533128	341563	160556	264276	344833	274121	357480	281483	640395	371218	580541	0.639435	1.56388
716	unkown1268	0.105571	0.468626	18	0	84372.5	0.376749	1	24.0327	17.9999	573355	0.168026	0.989289	21.0163	18.3786	511957	86839.1	0.169622	657450	689143	481449	565032	386011	520768	438401	444417	500585	374872	453272	567411	493875	630535	501553	667458	523264	818198	0.639533	1.56364
139	LPI 18:2	0.0579045	0.352905	18	6	383018	0.930948	1	20	6.00001	1.65759e+06	0.211339	1	19	6.01667	1.37206e+06	311047	0.2267	1261116	1052542	1073839	1133802	1617834	1657759	1682451	1672323	1312895	821369	889454	1105926	1447400	1948680	922191	1750314	1.33437e+06	2077785	0.642207	1.55713
182	PC 35:2 Isomer C	0.301037	0.811038	18	0	58069.7	0.996646	1	25.8651	17.9999	837891	0.661225	1	21.9326	18.5979	835022	46077	0.0551806	870953	951561	895129	874007	813576	684549	843223	812433	699823	755724	981402	892025	740105	854182	870029	887249	839123	1.30623e+06	0.642402	1.55666
4274	unkown6000	1	1	24	18	17909.2	0.989361	1	28	6	59796.8	0.999943	1	26	25.5357	52490.9	3741.16	0.0712727	34439	18891	23317	39041	114297	40204	37980	46706	91848	20305	30240	77279	87773	79556	36574	64950	52712.5	82003.3	0.642809	1.55567
510	unkown1056	0.873774	1	24	18	21296.6	0.884416	1	28	17.9999	116638	0.971973	1	26	18.1071	92715.1	86.2284	0.000930036	106195	50442	41236	88887	128889	86938	45057	90577	117945	49635	120597	90566	117154	105790	119730	123877	92719.7	144117	0.643365	1.55433
1064	unkown1740	0.587657	1	18	6	60959	0.97247	1	20	5.99999	204997	0.891237	1	19	6.01666	148617	63243.1	0.425543	118049	36382	59115	183105	218093	104164	309026	188705	67815	48464	204556	122145	176905	136632	168488	113614	140954	218607	0.64478	1.55092
1050	unkown1728	0.0787266	0.403933	18	0	25586.1	0.573966	1	24.2975	17.9999	260476	0.185127	1	21.1488	18.408	249034	24725.9	0.099287	280613	289313	266627	274743	214986	261978	252009	182592	254987	241800	239538	232609	274209	296311	245215	226168	252106	390364	0.645824	1.54841
749	unkown1324	0.587657	1	24	3	256013	0.591215	1	20	6	1.63314e+06	0.714732	1	22	4.675	1.44499e+06	224988	0.155702	1430440	1234969	1741970	1947703	1314034	1976475	1689158	1552902	1356371	635051	907526	1256634	1346094	1592577	945047	2082362	1.43808e+06	2217463	0.648526	1.54196
1070	unkown1751	0.380147	0.919777	18	6	161487	0.988184	1	20	6	650067	0.743453	1	19	6.01667	523400	140251	0.267962	425337	310785	323966	609186	682829	421953	926321	569166	323221	240226	707714	446987	528334	549483	557034	479925	506404	780141	0.649119	1.54055
713	unkown1264	0.139706	0.540373	18	0	293124	0.485731	1	24.2975	17.9999	2.1275e+06	0.250423	1	21.1488	18.408	1.93841e+06	288198	0.148677	2486249	2475280	1988312	2019352	1319337	2064828	1819219	1816862	1923601	1431837	1664983	2067622	1887747	2067570	1926214	2628490	1.97422e+06	3.03852e+06	0.64973	1.5391
1796	unkown2671	0.301037	0.811038	24	12	29654.6	0.67775	1	20.2759	12	350476	0.52833	1	22.1379	12.0855	299673	51086	0.170472	367945	175270	230044	281347	265924	314953	324379	244365	415428	293333	355176	337966	314332	281136	294133	253606	296834	455355	0.651872	1.53404
1641	unkown2501	1	1	18	12	12760.6	0.999975	1	20	12	167352	1	1	19	12.0333	148698	21648.3	0.145585	121161	158157	123251	193595	159830	155173	144857	89647	136683	210838	222175	99714	106248	140959	126473	149494	146141	224064	0.652229	1.5332
2502	unkown3428	1	1	18	15	8399.01	0.999998	1	20	17.9999	281568	1	1	19	16.4666	275871	8454.51	0.0306466	287154	252394	309838	278834	257377	282762	251033	277638	249975	326870	247554	289490	283482	256520	265006	321265	277324	424783	0.652862	1.53172
66	FA 18:0 (stearic acid)	0.380147	0.919777	18	6	1.2772e+06	0.980371	1	20	6	5684218	0.740534	1	19	6.01667	4.55619e+06	1.24133e+06	0.272448	3849504	2837376	2742117	5100877	5842289	3774122	8257587	4862874	2633275	2322767	5800689	3976918	4867085	4574462	5025063	4025249	4.40577e+06	6.73562e+06	0.6541	1.52882
3767	unkown536	0.873774	1	18	15	1.91863e+06	0.815408	1	28	6.63e-05	3.2132e+07	0.954014	1	23	21.0834	1.33253e+07	7.25692e+06	0.544596	7229999	79932479	24585295	16780949	14567838	6042171	6229882	6710201	9367962	7474110	6638132	8492080	6341373	5925804	6574889	5651885	1.36591e+07	2.08569e+07	0.654894	1.52697
915	unkown1540	0.0579045	0.352905	18	0	122201	0.776208	1	27.3065	17.9999	668298	0.184382	1	22.6533	18.7929	681055	94315.3	0.138484	766576	884082	877776	753135	423833	671866	595155	697654	708985	506066	630177	794678	673599	570396	677931	751268	686449	1.04782e+06	0.655121	1.52644
3508	unkown4931	1	1	18	6	45818.8	0.99994	1	20	6	1.08321e+06	1	1	19	6.01667	1.03486e+06	56882.9	0.0549666	846894	1065021	1031775	1001706	993922	1081008	1191700	1066207	868980	981957	1097642	1140511	1102826	812356	1082357	1082658	1027970	1.56851e+06	0.655379	1.52584
442	TG 52:4	0.873774	1	24	21	97294	0.9378	1	28	17.9999	2.5265e+06	0.982616	1	26	19.7321	2.20192e+06	98413.7	0.0446944	2272724	1529270	2108470	2092569	2593100	2191137	2019920	1610790	2059360	1734733	1975286	2816118	2644392	2735105	2130375	2596145	2.19434e+06	3342881	0.656423	1.52341
1052	unkown173	1	1	24	6	19914.6	1	1	24.5682	6	528367	1	1	24.2841	6.00082	510388	12851.7	0.0251802	586443	487258	424086	578054	659917	606775	449655	397122	503977	400854	455116	653218	435682	554466	437206	538306	510508	777688	0.656444	1.52336
776	unkown1361	0.235786	0.712255	24	3	104200	0.737298	1	20	6	389004	0.478002	1	22	4.675	332632	77939.5	0.234312	235503	367489	375941	508341	355068	369644	440891	390411	134463	103408	166010	269890	201011	385711	221206	758850	330240	502676	0.656963	1.52216
4304	unkown618	0.235786	0.712255	18	0	524864	0.881812	1	20	12	4.78357e+06	0.534478	1	19	15.2	4.28802e+06	1.13969e+06	0.265785	5116120	4290046	6116021	4720894	1404955	3753020	3658791	4394034	3718272	4682328	6073834	4659829	4813927	3133125	5243726	4677624	4.40353e+06	6.69971e+06	0.657272	1.52144
1106	unkown1805	0.139706	0.540373	18	3	113011	0.947936	1	28	6	765219	0.400169	1	23	4.38095	738964	128171	0.173447	819149	398106	595787	721455	1050572	771994	595887	642423	651616	436015	416619	644213	1097817	1201618	853584	897531	737149	1.12096e+06	0.657607	1.52067
834	unkown1440	0.182589	0.628607	18	3	12791.2	0.88849	1	20	6.63e-05	118714	0.457281	1	19	1.58336	113083	17462.7	0.154424	141476	97927	124886	110566	92089	148828	127833	92380	99632	106834	84109	100902	130492	152643	115750	130368	116045	175637	0.660708	1.51353
3002	unkown4132	1	1	18	0	69834.6	0.999524	1	24.2975	17.9999	608783	1	1	21.1488	18.408	563389	72721.4	0.129079	781088	524900	654417	608920	203049	705891	456293	705591	610224	333129	419712	720426	637576	466021	461234	870301	572423	864897	0.66184	1.51094
434	TG 50:5	0.873774	1	24	18	68547.8	0.923384	1	20	17.9999	625887	0.98001	1	22	18.15	581352	47422.4	0.0815726	725868	440101	614285	584558	574216	435807	534505	480768	718661	423255	635789	691345	667745	669299	509191	657312	585169	882777	0.662873	1.50858
1107	unkown1806	0.182589	0.628607	18	3	24395.5	0.868734	1	28	6	282994	0.45068	1	23	4.38095	281456	34431.1	0.122332	320129	151274	225014	259756	361109	298794	222832	249240	264891	191645	187734	267646	402412	415859	339556	337595	280968	423756	0.663041	1.5082
788	unkown1378	0.235786	0.712255	18	6	62350.7	0.413302	1	20	6	338046	0.324356	1	19	6.01667	273618	54049.3	0.197535	303804	264853	232400	300153	322983	395962	289872	343368	302737	92260	142668	242785	218190	339116	186530	295419	267069	402553	0.663438	1.5073
1065	unkown1741	0.301037	0.811038	18	6	62961	0.980932	1	20	6.00001	261642	0.655493	1	19	6.01667	201752	63075.9	0.312641	171729	120726	101111	250239	220583	181052	425259	219676	80374	95663	273118	130696	217791	201369	228705	187638	194108	292060	0.664618	1.50462
930	unkown1561	0.587657	1	24	3	30998.3	0.860215	1	24.9858	5.37e-05	208132	0.850364	1	24.4929	1.53083	185331	18392.4	0.0992406	166130	186374	233677	246346	178746	235485	208300	195265	191029	92687	131279	243995	137149	161092	157875	197605	185190	277170	0.668145	1.49668
880	unkown1497	0.105571	0.468626	18	6	88213.3	0.795012	1	20	6	318730	0.291889	1	19	6.01667	237281	84704.7	0.35698	246098	229723	115571	159100	202780	353728	363170	355242	220798	77725	165217	227969	178341	271710	119326	345769	227017	339211	0.669249	1.49421
3156	unkown4404	0.301037	0.811038	24	0	78792.9	0.653905	1	27.1385	6.63e-05	714365	0.516793	1	25.5692	3.12e-05	548999	120935	0.220283	552176	499384	887299	918605	543077	548245	382509	445936	430112	476024	611347	338854	639092	350228	490984	587678	543847	812031	0.669737	1.49312
3037	unkown421	1	1	24	0	89371.2	0.991359	1	25.5652	6.63e-05	447939	0.999963	1	24.7826	3.21e-05	437340	122456	0.280002	491373	880403	222339	197641	204844	508510	353840	431450	480840	260469	373888	363889	648714	457982	579025	496307	434470	648219	0.670251	1.49198
1061	unkown1738	0.235786	0.712255	18	6	25883.1	0.999876	1	20	6	135972	0.576415	1	19	6.01667	115024	24168.3	0.210116	120613	84584	47388	116998	157798	189495	90451	106146	91188	64629	97186	103120	170972	104346	104282	144324	112095	167135	0.670685	1.49101
3039	unkown4216	0.139706	0.540373	18	6	46496.9	0.992386	1	20	6.00001	157272	0.41258	1	19	6.01667	117418	42876.4	0.36516	95920	143089	40370	63189	72012	215860	190355	150861	83570	42161	70831	85401	102171	129014	71544	239211	112222	167188	0.671235	1.48979
43	CL 66:5|CL 32:2_34:3	0.0579045	0.352905	18	15	119487	0.890071	1	20	12	733982	0.204374	1	19	13.6167	684835	123405	0.180196	913539	609805	816721	708352	558320	546676	601954	540925	827168	605972	657114	845675	662955	820395	578032	644634	683640	1.01491e+06	0.673599	1.48456
4368	unkown78	0.0787266	0.403933	18	6	62261.1	0.982766	1	20	6	248564	0.275372	1	19	6.01667	203684	43808.3	0.215079	215617	264534	102813	143130	232825	250070	278930	232430	150483	80849	121578	199099	154372	195650	152653	398979	198376	294011	0.674723	1.48209
879	unkown1496	0.301037	0.811038	18	9	82587.4	0.953679	1	20	6.00001	433519	0.64537	1	19	7.60001	331964	77967.1	0.234866	289774	390225	78524	189597	259017	514190	505461	455407	355702	103634	245864	403201	241485	321926	294344	417854	316638	468987	0.675152	1.48115
4299	unkown607	0.235786	0.712255	24	6	189783	0.818275	1	28	6.63e-05	1.26996e+06	0.510396	1	26	3.25003	550050	535800	0.974094	215029	3255431	976801	632586	786904	199038	419608	260804	406795	252153	142963	385202	159179	142492	249479	176908	541336	798390	0.678034	1.47485
779	unkown1367	0.139706	0.540373	24	3	59467	0.34595	1	20.7529	5.99998	270164	0.19476	1	22.3765	4.63321	229617	40052.9	0.174433	236197	231192	301756	303805	186465	331799	310429	251962	176947	95288	151011	227417	160613	197650	189670	305287	228593	334724	0.682929	1.46428
76	FA 22:0;O	0.235786	0.712255	18	0	753757	0.859417	1	27.4766	17.9999	6.95839e+06	0.526117	1	22.7383	18.8171	7.08772e+06	758289	0.106986	10330594	7860582	7231276	7499735	6430520	7275274	6574427	5465668	7555314	6150342	6214493	7630674	7353705	7449675	6337783	6692411	7.12828e+06	1.04137e+07	0.684511	1.4609
1446	unkown2240	1	1	24	6	21209.3	0.999993	1	28	12	259558	1	1	26	8.82143	241853	10570.8	0.0437077	266014	303739	270846	197391	302171	269655	238074	151555	261268	221827	210868	344271	236022	229268	173843	208077	242806	351945	0.689896	1.44949
1049	unkown1727	0.475047	1	18	0	11163.8	0.988708	1	25.7143	17.9999	98693.2	0.824621	1	21.8571	18.5785	97144.6	10061	0.103567	142307	108342	90047	101119	82991	82774	106130	79688	97359	72565	89991	121098	96052	110082	86777	101862	98074	141760	0.691831	1.44544
628	unkown1178	0.235786	0.712255	18	6	24468.4	0.999985	1	28	6	103472	0.576452	1	23	6.29762	82679	18636.9	0.225413	62779	80535	15129	56531	131060	112589	75734	94507	72171	47385	60011	101343	96713	80998	71455	153650	82036.9	118395	0.692908	1.44319
3916	unkown5558	1	1	18	12	3920.38	0.999999	1	21.7778	12	69011.8	1	1	19.8889	12.1092	64984.3	3160.15	0.0486295	45087	67380	60814	72672	66791	64458	80904	35398	66214	41664	80988	87181	56815	58995	71356	77807	64657.8	93021.3	0.695085	1.43867
2763	unkown3737	0.301037	0.811038	18	6	62138.4	0.888168	1	21.1511	6	298234	0.620066	1	19.5755	6.03912	240573	45141.6	0.187643	162346	197179	170038	483722	286069	250622	275175	381070	243976	116215	257434	163144	208051	214072	184468	172210	235362	337989	0.696359	1.43604
135	LPG 18:2	1	1	18	9	37016	0.999719	1	28	17.9999	305241	1	1	23	13.1428	259229	1895.64	0.00731261	299119	322962	30423	121298	299898	286200	270373	195719	226324	280668	376081	217033	264581	180604	184352	591426	259191	369010	0.702397	1.4237
508	unkown1054	0.0787266	0.403933	18	3	65846.5	0.552373	1	20	6.63e-05	376572	0.17983	1	19	1.58336	328288	72872.3	0.221977	488856	305655	416278	295500	401485	438282	275903	279243	315437	214049	227006	263690	331024	440634	408968	348330	340646	484391	0.703247	1.42198
4469	unkown946	0.139706	0.540373	18	0	36324.1	0.7726	1	25.7143	17.9999	93049.7	0.348227	1	21.8571	18.5785	88120.8	30543.8	0.346612	112101	143506	106280	151918	34178	41667	94096	71859	55689	136707	63206	71672	48095	114611	69896	139597	90942.4	129120	0.704322	1.4198
650	unkown12	0.105571	0.468626	18	15	1.98846e+07	0.95225	1	20	12	1.45968e+08	0.331477	1	19	13.6167	1.36998e+08	2.33313e+07	0.170304	142186225	111153047	202453971	149523468	88016122	130990242	122989345	108560304	178774245	139746170	115777753	149574678	131053235	139600172	133294326	144654335	1.36772e+08	1.93905e+08	0.705354	1.41773
1119	unkown182	1	1	24	18	10657	0.999983	1	27.4766	17.9999	245204	1	1	25.7383	18.0825	235643	1981.01	0.00840682	219442	282888	188462	209902	268862	184560	224149	237284	218599	310687	210406	232728	270595	216822	235279	258119	235549	333283	0.706753	1.41492
3821	unkown5437	1	1	18	9	4010	1	1	28	6	62936	1	1	23	8.21429	58966	1897.38	0.0321776	39628	50667	47145	76517	58259	44303	95370	53812	75946	39043	46799	65946	68787	74233	45279	60341	58879.7	83240.6	0.707343	1.41374
551	unkown11	0.301037	0.811038	18	15	6.28828e+06	0.955738	1	20	12	49355177	0.646143	1	19	13.6167	4.62321e+07	7.80141e+06	0.168744	48312405	36817853	68461161	49286975	28880133	44604699	41789620	36888185	61202428	46013697	39918353	50286230	44459515	46738631	45382617	49462948	4.61566e+07	6.51001e+07	0.709009	1.41042
4308	unkown63	0.301037	0.811038	18	15	54618.3	0.990744	1	28	12	561889	0.659081	1	23	14.5119	519294	118959	0.229079	618972	602338	571557	550165	470574	495806	548837	428407	590305	492564	535833	628853	413853	476864	426122	451888	518934	731876	0.709046	1.41035
857	unkown1469	0.719948	1	18	6	67085	0.999976	1	20	6	278791	0.9565	1	19	6.01667	231139	50649.4	0.21913	228252	321092	94890	137283	205378	284798	354400	270587	180530	86078	195448	239922	149051	192091	157411	502807	225001	317171	0.709399	1.40964
860	unkown1473	1	1	18	6	55983.2	1	1	20	6	296052	1	1	19	6.01667	269342	31655.3	0.117528	236180	427790	102077	183247	221563	350259	345472	266914	252596	85753	182094	418771	222411	210367	192282	550322	265506	373971	0.709964	1.40852
2573	unkown3497	1	1	24	18	13374.9	1	1	21.995	17.9999	255533	1	1	22.9975	18.0342	244882	7171.61	0.0292859	294893	154626	275936	233627	277355	292401	186611	169689	238539	206625	259656	310217	263707	292055	175865	290504	245144	344961	0.710644	1.40717
1678	unkown2546	0.0787266	0.403933	18	12	61365.2	0.454574	1	20	12	312163	0.154964	0.9509	19	12.0333	246593	75302.8	0.305372	270126	211466	215819	207160	154963	287629	266647	189248	311837	255056	322275	359484	209207	168638	139518	234089	237698	334098	0.711461	1.40556
2683	unkown3628	0.301037	0.811038	18	0	84518.9	0.638823	1	28	12	207801	0.50936	1	23	4.92856	209706	98352.2	0.469	356576	280709	411821	258044	113381	184596	205407	140479	245084	152977	280225	152918	157981	100617	146884	200048	211734	297483	0.711753	1.40498
800	unkown1392	0.301037	0.811038	18	15	49121.6	0.651934	1	20	12	213824	0.515827	1	19	13.6167	190704	50524.1	0.264935	185291	249129	147367	242793	178004	138539	117479	81942	260009	168186	157786	269316	156699	200181	180494	310222	190215	266459	0.713861	1.40083
4341	unkown730	1	1	24	18	67443.1	0.996619	1	20	17.9999	921094	0.999994	1	22	18.15	870738	81776	0.0939158	745735	726520	1322603	888980	555353	868652	841595	793273	1131085	847596	771819	859524	1005071	904336	757579	1017390	877319	1.22865e+06	0.714051	1.40046
451	TG 54:5 Isomer A	1	1	24	18	76613.6	0.939989	1	28	5.99999	519281	0.998162	1	26	25.5357	515981	49415.8	0.0957707	402346	383156	489223	437793	742893	506621	407881	419729	497997	404389	411657	626601	597402	660138	609603	611422	513053	717859	0.714699	1.39919
3854	unkown5477	1	1	18	15	6380.22	1	1	28	12	120646	1	1	23	14.5119	114471	11776.6	0.102879	84179	127780	136773	121650	98202	95808	117812	138913	117086	116585	138367	110544	91672	143180	97108	95302	114435	159856	0.715864	1.39691
443	TG 52:5	1	1	24	18	65929.6	0.99974	1	28	6	931038	1	1	26	25.5357	908236	62204.5	0.0684894	876249	751650	843173	837388	1110790	991999	790939	830424	1051610	703075	727792	936010	1010248	1075967	911560	1023934	904550	1.26332e+06	0.716009	1.39663
4257	unkown5985	0.587657	1	18	3	16529	0.99961	1	28	6	231288	0.899941	1	23	4.38095	229195	15491.5	0.0675907	251041	131769	252428	225843	291776	248434	194511	190432	167021	156174	206521	277724	258877	265974	243390	301700	228976	319752	0.716105	1.39644
1691	unkown256	0.587657	1	18	6	126590	0.999333	1	20	6	1.45415e+06	0.899854	1	19	6.01667	1.39641e+06	55707.4	0.0398933	1619328	1171098	1363945	1294612	1471457	1545151	1459369	1340612	1133348	1196949	1648874	1070171	1651850	1506016	1381347	1380466	1.38966e+06	1.93915e+06	0.716635	1.39541
980	unkown1628	1	1	18	0	10471.5	1	1	21.5648	4.66e-05	285680	1	1	19.7824	2.14e-05	272757	11155.5	0.040899	363364	269827	220290	289239	377086	273583	255865	189041	281056	232653	246782	279896	267800	349878	242826	257554	274796	383207	0.717096	1.39451
621	unkown1171	0.105571	0.468626	18	6	119024	0.999178	1	20	5.99999	532069	0.342738	1	19	6.01666	430104	122193	0.284101	388119	383695	177836	289484	649192	632699	394096	452289	353832	283745	284182	437143	509135	368005	328071	713224	415297	576336	0.720581	1.38777
1054	unkown1731	1	1	18	0	37979.4	0.977003	1	28	17.9999	622354	0.999734	1	23	18.8928	639886	49476.8	0.0773213	979759	642020	632840	641200	557514	698803	654288	517495	665326	574215	586829	631844	659895	649081	586219	594222	641972	887518	0.723334	1.38249
450	TG 54:4	0.873774	1	24	15	68877.2	0.943284	1	28	6	653282	0.983556	1	26	10.9107	626598	24653	0.0393441	534579	499053	560582	476815	817974	701162	598299	495694	757322	522266	600268	693822	836609	793056	516657	653278	628590	868439	0.723816	1.38157
440	TG 52:2	0.475047	1	24	15	176054	0.751886	1	28	12	2.17444e+06	0.724904	1	26	13.6964	2.00125e+06	200794	0.100335	2215784	1334635	1638494	1534595	2189635	2416654	1968802	1626242	2441623	1741640	2343906	2170594	2115112	2433532	1820799	2150313	2.0089e+06	2.77322e+06	0.72439	1.38047
1033	unkown1697	1	1	24	6	8511.27	0.996832	1	28	12	123851	0.999995	1	26	8.82144	114275	4632.75	0.0405404	162911	135555	113989	101013	101979	126745	125062	93796	124307	101778	112131	157189	85418	87333	92693	113182	114693	158310	0.724481	1.3803
4318	unkown674	0.587657	1	18	15	394592	1	1	28	12	1278602	0.900063	1	23	14.5119	1.0684e+06	642013	0.600913	1686918	1256948	1567316	1158272	565765	916042	900226	854215	1780480	973042	843191	1517695	1399729	1506287	73930	63179	1.06645e+06	1.46937e+06	0.725788	1.37781
1443	unkown2238	0.873774	1	18	15	5.02456e+06	0.997026	1	20	12	7.43685e+07	0.991321	1	19	13.6167	6.93102e+07	7.34311e+06	0.105946	69493945	76985073	73683664	66674890	68534222	70130848	66083906	54354589	79704532	68477053	64718582	84573727	66974068	69535001	60288066	67612712	6.92391e+07	9.51368e+07	0.727784	1.37403
3551	unkown503	0.139706	0.540373	24	15	579670	0.582977	1	23.9024	12	4217539	0.285696	1	23.9512	13.497	3.73713e+06	441829	0.118227	4068513	3360820	3370910	2246142	2228408	4015351	3441142	3731356	4276453	3432765	4704525	4456413	4821694	3486098	4262838	3884625	3.73675e+06	5.1275e+06	0.728767	1.37218
2029	unkown2931	0.105571	0.468626	18	3	35286.4	0.662836	1	28	6	320066	0.256085	1	23	4.38095	312007	69862.6	0.223914	291095	211583	217163	197643	379402	361971	253408	285483	265403	172225	175938	270116	564343	461026	454140	415339	311017	425843	0.730357	1.36919
626	unkown1176	0.719948	1	18	6	381351	0.999754	1	20	6.00001	1.72854e+06	0.956448	1	19	6.01667	1.42532e+06	371243	0.260463	1315965	1279108	626073	955067	2161273	2016554	1259146	1477168	1339971	910047	1020286	1459162	1646940	1274429	1048159	2295989	1.38033e+06	1.88988e+06	0.73038	1.36915
225	PE 26:1|PE 12:0_14:1	1	1	24	6	72324.3	0.922533	1	28	6.63e-05	976791	0.996919	1	26	3.25003	884360	43506.1	0.049195	1033404	1114731	830343	928687	1074486	976467	794714	763017	968118	836592	852791	898345	969107	854894	605055	637694	883653	1209730	0.730455	1.36901
3457	unkown4873	1	1	18	12	8154.53	0.999974	1	20	12	55954.8	1	1	19	12.0333	48516.8	7080.06	0.14593	29411	40041	44442	74182	23475	55988	71584	13993	67821	30187	62795	63016	35617	38691	43305	68339	47680.4	65057.3	0.732899	1.36444
142	LPS 18:2	0.0787266	0.403933	18	6	72203.4	0.919234	1	20	6	304048	0.262406	1	19	6.01667	241679	69048.9	0.285705	204041	179267	160843	208395	241572	331381	356589	286650	243844	116140	159083	229263	217116	293525	165625	339647	233311	318096	0.733463	1.3634
785	unkown1374	0.0787266	0.403933	18	6	585080	0.795245	1	20	6	2.35285e+06	0.236083	1	19	6.01667	1.85276e+06	528453	0.285225	1913017	1910836	873996	1372632	1797345	2842094	2538536	2233431	1685408	841963	1445394	1834657	1405338	2038899	1538216	2347737	1.78872e+06	2.4387e+06	0.733472	1.36338
4143	unkown5858	0.139706	0.540373	18	0	17016.2	0.844579	1	20	17.9999	224532	0.37016	1	19	18.05	212971	20336.6	0.09549	270694	222103	254178	209596	205017	146436	236573	167617	246895	204259	201781	214960	221458	260246	210982	205442	217390	296341	0.73358	1.36318
2093	unkown2993	0.301037	0.811038	18	6	158513	0.932974	1	28	6	1.01272e+06	0.637524	1	23	6.29762	955350	28697.8	0.0300391	946092	546740	773287	731374	1298605	1143415	807486	801393	800028	551137	617648	909287	1697986	1170232	1196807	1309899	956338	1.30206e+06	0.734481	1.36151
432	TG 50:3 Isomer A	0.873774	1	24	18	447140	0.993207	1	28	17.9999	7.08701e+06	0.990854	1	26	18.1071	6.40811e+06	430980	0.0672555	7193019	4295471	7280795	5784262	6406981	6749351	5947607	5015140	6077974	5151983	6424278	7488218	7418797	7473320	5396747	8059198	6.3852e+06	8.69205e+06	0.734602	1.36128
9	CAR 19:0	0.873774	1	18	12	4198.09	0.991686	1	20	12	73378	0.990665	1	19	12.0333	67796.4	6387.79	0.0942203	59963	67474	50378	75450	74539	52304	82791	63940	80361	80591	78195	54365	73763	59268	58533	60753	67041.8	90841.6	0.738007	1.355
449	TG 54:3	0.475047	1	24	15	64937.9	0.91653	1	28	18	729477	0.797427	1	26	16.4821	669227	84023.9	0.125554	738180	454671	535249	508384	853926	742433	589868	568194	815814	584618	685001	741906	666252	896863	596799	757996	671010	905426	0.741098	1.34935
332	PI 28:0|PI 14:0_14:0	1	1	18	9	132773	1	1	20	6.00002	3.33078e+06	1	1	19	7.60001	3.20243e+06	127824	0.0399146	3234266	3123143	2807631	2964058	4041141	3563019	2923243	2795698	3469640	2595634	2852296	3772925	3404133	3035749	3102600	3151684	3.1773e+06	4281052	0.742178	1.34739
1128	unkown183	0.475047	1	24	15	27366.1	0.889135	1	21.7778	12	698039	0.786409	1	22.8889	13.4589	662271	42707.4	0.0644864	606596	598063	627154	703278	661492	685213	672915	582128	690569	728775	631904	740909	675932	623132	730523	625724	661519	889065	0.744062	1.34397
4448	unkown911	0.0579045	0.352905	18	3	1.79282e+06	0.810905	1	20	6.00001	7054640	0.19057	1	19	4.43334	6.35675e+06	2.34491e+06	0.368886	9041999	4089669	5304006	5867413	8624111	8122842	4597225	6874382	5550494	2979069	3127422	3847917	9535158	9541776	7619626	6485379	6.32553e+06	8.47664e+06	0.746231	1.34007
796	unkown1385	0.873774	1	18	6	31302.6	0.921358	1	20	6	188663	0.979628	1	19	6.01667	156134	32125.8	0.205757	148751	133866	159420	126622	140862	258229	179837	175723	174117	74384	86107	184549	152023	179774	106015	155584	152241	203864	0.746781	1.33908
2754	unkown3728	0.182589	0.628607	18	15	42871.7	0.925493	1	20	12	364728	0.46943	1	19	13.6167	305832	72403	0.236741	292472	259689	377807	323613	182409	332524	295816	248926	393866	340397	373159	351488	233825	295891	383314	196902	305131	407805	0.748228	1.33649
3004	unkown4135	0.0579045	0.352905	24	3	38828.3	0.4229	1	22.5575	6.63e-05	154057	0.115327	0.815245	23.2788	1.45496	119200	40873.3	0.342898	99213	102535	203327	211152	78386	141820	150168	185597	84485	64757	76808	89360	109556	105757	80941	133185	119815	160102	0.748368	1.33624
1681	unkown2549	0.235786	0.712255	18	12	61842.7	0.295314	1	20	12	348177	0.255166	1	19	12.0333	272185	80628.9	0.296228	298144	264947	192876	205271	170092	300857	256901	216409	351686	277972	342170	420881	216928	214586	198694	274148	262660	349754	0.750985	1.33158
1416	unkown2203	0.475047	1	24	12	18467.2	0.723788	1	25.4179	12	127739	0.710909	1	24.7089	12.0099	109483	19779.9	0.180666	61408	77128	124029	87146	61946	123132	151756	116794	115049	139835	119245	136826	124259	108657	91663	120291	109948	146363	0.751201	1.3312
2343	unkown3247	0.0787266	0.403933	18	6	18464	0.76058	1	20	6	137139	0.228461	1	19	6.01666	118850	17786.9	0.149659	119371	90349	113034	120925	107841	166022	142348	132346	103088	73831	115282	97881	99833	142852	128661	113449	116695	155215	0.751827	1.33009
3795	unkown5403	0.182589	0.628607	18	0	16242.2	0.502596	1	20	17.9999	211958	0.310956	1	19	18.05	201260	15064.4	0.0748505	231910	231064	207830	203152	182198	201289	188486	158278	224741	181331	201219	213201	193962	211005	210804	232061	204533	271108	0.754436	1.32549
4426	unkown877	0.0579045	0.352905	18	3	654647	0.757478	1	20	6.00002	2357110	0.181004	1	19	4.43334	2.11408e+06	881122	0.416787	3166773	1205675	1619756	1926753	2733916	2714276	1734890	2245358	1358796	978289	1094627	1309042	3451734	3116358	2497773	2483620	2.10235e+06	2.78629e+06	0.754535	1.32532
2913	unkown3924	0.719948	1	18	15	24346.4	0.975039	1	20	12	136074	0.950375	1	19	13.6167	127497	27617.6	0.216614	133832	164962	136948	160144	39984	95944	145381	113972	98265	129763	164622	151648	121653	96126	140743	141681	127229	168115	0.756799	1.32135
2296	unkown32	0.380147	0.919777	18	9	179904	0.98027	1	28	5.99999	1.16518e+06	0.740496	1	23	8.21428	1.04245e+06	91852.7	0.0881123	1013756	638027	795566	834189	1292608	1281967	1085840	1000290	1265896	779178	857353	1203433	1380601	1097244	1050103	1036286	1.03827e+06	1.3688e+06	0.758526	1.31835
4281	unkown6009	0.475047	1	18	9	53656.5	0.906167	1	28	6.00002	342196	0.793305	1	23	8.21429	313856	33916.9	0.108065	355474	209537	226871	219812	333626	420952	330258	283948	380895	251869	360264	321523	302825	383817	295536	319798	312313	411433	0.759085	1.31738
4325	unkown692	0.235786	0.712255	18	15	215185	0.999383	1	20	12	1494360	0.576247	1	19	13.6167	1.31737e+06	272673	0.206983	965806	1516380	1844755	1405748	1196411	985406	1083854	1346514	1502367	1759171	1288085	1427817	1146092	1394308	1062477	1110497	1.31473e+06	1.72425e+06	0.762493	1.31149
4293	unkown6023	1	1	24	18	10099.4	0.987752	1	28	6	47992.2	0.999925	1	26	25.5357	44820.8	963.975	0.0215073	28193	43489	26938	25225	79917	50807	35562	25683	55108	25674	54038	42050	63209	68358	57897	34071	44763.7	58642.9	0.763327	1.31005
4501	unkown99	0.0579045	0.352905	18	9	99068	0.832421	1	20	6	433558	0.194364	1	19	7.6	330038	89127.7	0.270053	270908	164051	140410	202129	580318	404315	364996	384601	342982	229551	254940	301402	391236	385538	319688	263214	312517	408492	0.765052	1.3071
881	unkown1498	0.105571	0.468626	18	6	300549	0.850439	1	20	6	1.03324e+06	0.306188	1	19	6.01667	757637	296716	0.391633	715480	820944	234432	448788	612186	1197426	1093827	1229507	758928	247391	510417	659872	534300	913502	544078	1025817	721681	941850	0.766238	1.30508
2159	unkown3057	1	1	18	12	22487.1	0.999985	1	20	12	678350	1	1	19	12.0333	653642	28623.9	0.0437913	679095	637524	599537	695128	716688	608749	661913	571400	676232	626761	676273	734132	654155	554724	702489	609367	650260	848574	0.766298	1.30498
2908	unkown3918	0.719948	1	18	15	17051.9	0.995861	1	20	12	106810	0.955521	1	19	13.6167	99776	17139	0.171775	103061	114708	136903	75045	86744	54215	89749	87833	137631	50647	138915	100045	131856	63293	91799	131317	99610.1	129927	0.766659	1.30436
931	unkown1563	0.0787266	0.403933	24	6	53915.5	0.255365	1	22.6735	6.63e-05	343007	0.0986471	0.748161	23.3368	2.91713	298629	70043.5	0.23455	272724	310142	425966	363197	296483	360545	372890	335842	284120	155909	242593	300564	236419	282647	247803	292538	298774	389533	0.767006	1.30377
2786	unkown3770	0.587657	1	18	3	37514.5	0.9793	1	20	6.63e-05	466615	0.893469	1	19	1.58336	441150	49753.4	0.112781	495770	434446	496155	440088	317003	600386	475182	414864	398594	324268	447586	405613	483601	587380	412557	459907	449588	585391	0.768012	1.30206
441	TG 52:3	0.0787266	0.403933	24	15	375293	0.429909	1	27.6489	12	2.81065e+06	0.148444	0.925977	25.8245	13.6742	2.51625e+06	335131	0.133187	2180377	1758387	2325529	2054659	2943209	2746051	2448830	1959378	3305414	2129185	2907861	2900141	2883614	2873518	2332082	2697715	2.52787e+06	3.28845e+06	0.768713	1.30088
7	CAR 18:1	0.105571	0.468626	18	6	291254	0.997483	1	28	6.00001	2053305	0.342335	1	23	6.29762	1.79461e+06	256546	0.142953	1237328	997277	1640971	1869596	2267495	2143798	2015011	1786916	1963667	1557630	1678772	1559539	2044785	1895539	1795493	2118586	1.78578e+06	2.31579e+06	0.77113	1.2968
4362	unkown768	0.139706	0.540373	18	6	697959	0.998822	1	20	6	4.02408e+06	0.414354	1	19	6.01666	3.50923e+06	655479	0.186787	3729518	2885406	2192585	2316411	3626716	4546216	3763746	4159649	3926386	2580614	2790580	3267253	3499688	3919723	3937904	3734447	3.4298e+06	4.44434e+06	0.771724	1.2958
4255	unkown5983	1	1	24	18	38154.6	0.999362	1	28	17.9999	698144	1	1	26	18.1071	644992	23886.3	0.0370334	672926	476405	756859	557081	727422	679418	586389	487563	622559	547998	624827	767528	738821	701778	572923	779055	643722	831265	0.774389	1.29134
2662	unkown3601	0.719948	1	18	15	39017.1	0.999856	1	20	12	1.22651e+06	0.956472	1	19	13.6167	1.18529e+06	161374	0.136148	1354134	1232106	1612727	1172181	498003	1227343	1190280	1215717	1233001	1131231	1273897	1267894	1236466	969216	1091011	1234373	1.18372e+06	1.52795e+06	0.774713	1.2908
3690	unkown5250	0.0579045	0.352905	24	21	14411.5	0.752014	1	23.3952	17.9999	302397	0.180013	1	23.6976	19.484	285519	15778.7	0.0552631	286507	328015	266702	276403	263846	283607	260774	262018	264243	315224	269442	285244	292688	273769	311112	332021	285726	368647	0.775066	1.29021
1158	unkown1875	0.719948	1	24	12	26387.5	0.941833	1	23.2718	12	660272	0.941504	1	23.6359	12.0028	606853	57361.1	0.0945222	542443	539152	586235	561546	664852	701741	572662	502506	646020	549563	592567	852938	621707	597339	555304	612247	606176	781315	0.775841	1.28892
452	TG 54:6 Isomer A	0.105571	0.468626	24	15	39547.4	0.749742	1	28	6.00004	279155	0.279909	1	26	10.9107	252459	34103.1	0.135084	177744	173202	128248	184339	347208	357137	203053	209223	350207	238648	216764	309783	353414	404756	206759	222930	255213	328231	0.777543	1.2861
4504	unkown993	0.0787266	0.403933	18	15	56147.8	0.547454	1	20	12	463007	0.178614	1	19	13.6167	416550	72438	0.1739	432507	388334	518438	383877	274527	367488	354056	412648	420628	433393	492121	505885	451573	401723	435152	381230	415849	534277	0.778339	1.28479
1279	unkown2031	0.139706	0.540373	18	12	91737.9	0.548897	1	20	12	464166	0.273614	1	19	12.0333	352351	122817	0.348565	288956	345544	264537	280977	497036	288253	221599	274326	625026	302997	411942	516697	227171	370066	271201	219153	337843	433356	0.779596	1.28272
426	TG 48:5	0.719948	1	18	6	26720.3	0.999999	1	28	6	246819	0.956506	1	23	6.29762	229540	7383.5	0.0321666	247411	165496	195686	199697	304200	273880	215406	193791	191993	146497	232910	235782	302371	294248	190143	279052	229285	293704	0.780668	1.28095
2971	unkown4048	0.301037	0.811038	18	6	43205.3	0.999782	1	28	6	757506	0.66236	1	23	6.29762	557370	158490	0.284353	95225	81841	119611	100069	84811	149310	1355338	1440565	1124289	56806	78828	92615	70832	1185534	1222328	1572555	551910	706171	0.781553	1.2795
4137	unkown5852	1	1	24	18	5510.13	0.999124	1	28	17.9999	59609.7	1	1	26	18.1071	48940.7	5999.29	0.122583	69284	41086	33811	33338	73032	43697	37446	20609	47243	45847	48449	45668	29946	90682	42933	74878	48621.8	62026.6	0.783886	1.2757
3088	unkown431	1	1	18	6	41840.6	0.999999	1	28	6.00001	434143	1	1	23	6.29762	429512	2073.51	0.00482759	464095	339605	411975	289696	224622	554404	417889	539657	388709	277459	595981	368426	554601	239935	743573	460430	429441	545326	0.787494	1.26985
2541	unkown3466	1	1	18	15	22172.4	0.999792	1	20	17.9999	354063	1	1	19	16.4666	344536	21211.5	0.0615654	294258	431860	376500	358627	333112	273076	325558	367807	288118	367833	380559	357340	305958	326927	375173	408196	348181	441889	0.787939	1.26913
836	unkown1444	0.105571	0.468626	18	15	23967.2	0.83105	1	20	12	162651	0.301231	1	19	13.6167	130054	39028.6	0.300095	153946	139107	128204	108418	112749	106562	131504	81693	192361	114985	159306	183951	164968	84841	122410	89814	129676	164403	0.788769	1.2678
4372	unkown786	0.0579045	0.352905	18	0	971319	0.26738	1	20	17.9999	4.16423e+06	0.0800142	0.667032	19	18.05	3.59633e+06	767649	0.213454	5152993	3905386	4995660	3724828	2054898	2541800	2685659	3073152	4553502	3112334	2800558	4952195	4517908	3831127	3936405	4371494	3.76312e+06	4.77067e+06	0.788803	1.26774
3137	unkown4383	1	1	18	0	22581.1	0.9888	1	28	12	247711	0.999937	1	23	4.92857	242492	14019.1	0.0578126	285320	240467	273909	278120	197865	244248	306114	204355	224589	229403	269627	267225	184853	200127	220433	257836	242781	306824	0.79127	1.26379
3559	unkown505	0.0579045	0.352905	18	15	3.07571e+06	0.952454	1	20	12	1.58096e+07	0.214962	1	19	13.6167	1.37309e+07	3.8605e+06	0.281154	14868001	18372098	18720557	10738402	6525615	11976176	11170888	13086792	17829237	15322698	14376074	15710192	13800801	11647638	13324085	11626992	1.36935e+07	1.72976e+07	0.791643	1.2632
677	unkown1226	0.475047	1	18	9	36379.4	0.534157	1	28	6	171416	0.601744	1	23	8.21428	146830	27267	0.185705	137289	123141	32753	52178	205421	190004	146322	143915	172953	122402	165490	163312	173652	164165	165605	170816	145589	183589	0.793015	1.26101
1284	unkown2038	0.301037	0.811038	18	12	175847	0.632149	1	20	12	1.10938e+06	0.506038	1	19	12.0333	858799	271760	0.316442	689834	793159	553384	739651	1194180	727554	580646	741404	1571204	663177	948916	1254206	644834	949713	638020	537240	826695	1.04241e+06	0.793065	1.26093
4375	unkown79	0.0787266	0.403933	18	6	224815	0.999601	1	20	5.99998	834007	0.278752	1	19	6.01666	686055	159981	0.23319	692110	849532	238902	454949	793672	927085	878623	736649	533427	275336	411460	667392	505396	734571	506568	1461023	666668	840572	0.793112	1.26086
4138	unkown5853	1	1	24	18	10436.5	0.997638	1	26.6465	17.9999	119815	0.999997	1	25.3233	18.0493	103619	13185.3	0.127249	110683	96444	118067	75729	148551	46383	98433	76902	114118	59953	106687	118743	105745	155501	121527	96487	103122	129873	0.794021	1.25941
2970	unkown4046	1	1	18	3	19543.7	0.931184	1	24.5682	6.54e-05	121283	0.997576	1	21.2841	1.77371	102727	13633.5	0.132717	113798	166437	86587	118310	62791	133194	117118	123149	91290	74670	86241	95917	142395	67674	94104	84606	103643	130289	0.795484	1.2571
2659	unkown3599	1	1	18	0	35455.4	0.9998	1	27.6489	12	697790	1	1	22.8245	4.95306	693832	124555	0.179518	880694	679544	986422	636926	297013	759983	695160	715250	699633	663347	774434	653747	705261	579179	654090	768780	696841	875183	0.796223	1.25593
888	unkown1504	1	1	18	6	37798	1	1	20	6.00002	248659	1	1	19	6.01668	221751	32222.4	0.145309	217297	295862	91171	159950	234844	260206	249312	250275	299803	125084	131207	260218	212709	282649	184923	230036	217847	272978	0.798039	1.25307
2046	unkown2949	0.380147	0.919777	18	6	9080.84	0.816583	1	20	6	140347	0.67356	1	19	6.01667	128304	11285.6	0.0879598	126212	111463	117788	146415	134162	171713	128609	126903	111160	110795	125360	132034	108914	127295	126864	125289	126936	159019	0.798245	1.25275
807	unkown1400	1	1	24	0	160422	0.947648	1	23.6461	17.9999	1.72276e+06	0.998605	1	23.8231	20.9788	1.60397e+06	171721	0.10706	1931789	2131321	1414983	1452401	1125356	1655231	1458633	1552028	1705769	1217983	1433987	1715581	1596176	1626952	1525652	2142261	1.60538e+06	2008870	0.799147	1.25134
454	TG 56:2	0.475047	1	24	18	22326.9	0.848735	1	28	6.00002	277398	0.769426	1	26	25.5357	282531	19769.8	0.0699739	255906	269528	227023	265252	320209	323590	244613	221179	316580	252583	267514	254668	347708	325823	288158	321429	281360	351872	0.799608	1.25061
3723	unkown530	0.475047	1	24	15	118443	0.630795	1	28	6.00003	1.35035e+06	0.660779	1	26	10.9107	1.24869e+06	128284	0.102734	1345145	1056911	779833	697101	1239934	1458468	1320454	1382546	1458120	1006271	1395481	1514168	1528559	1171579	1486439	1303871	1259055	1.57317e+06	0.800329	1.24949
2877	unkown3880	0.0787266	0.403933	18	0	23913.3	0.771145	1	27.4766	12	140122	0.230797	1	22.7383	4.96531	142588	40179.5	0.281788	162117	187313	201694	160144	72494	132512	127832	141697	126792	129763	152286	151648	123144	117115	151354	160142	143628	178961	0.802566	1.246
2985	unkown4090	1	1	24	12	15546.1	0.995975	1	28	12	169049	0.999992	1	26	12.0714	151849	20054.8	0.132071	184379	130164	193370	128211	122643	169608	168300	152433	183533	165410	182112	145142	153814	113870	126314	131615	153182	190752	0.803043	1.24526
467	unkown1009	1	1	18	0	22598.4	1	1	26.3284	6.63e-05	638797	1	1	22.1642	2.79e-05	618967	12222.4	0.0197464	644370	658611	648418	603788	527394	725308	614435	579510	701901	494681	590006	653332	599515	783255	541053	551806	619836	770942	0.803999	1.24378
4253	unkown5981	1	1	24	18	5422.8	1	1	28	6	139327	1	1	26	25.5357	133300	9415.84	0.0706366	148964	79764	131648	115053	113884	215880	142997	84548	88069	123129	135167	149791	162687	132250	90830	209210	132742	164850	0.805227	1.24189
1340	unkown211	0.0787266	0.403933	18	6	222485	0.978415	1	28	6	1003691	0.274494	1	23	6.29762	870071	26400.3	0.0303426	727881	483976	527749	580693	1351399	1029413	785848	848104	697512	366796	531817	679892	1702684	1313115	1237269	1042443	869162	1.07929e+06	0.805311	1.24176
3273	unkown4561	1	1	18	6	5830.8	1	1	28	6	40858	1	1	23	6.29762	36783.4	3355.34	0.0912188	31538	19310	24203	49792	23059	53771	56067	30535	59746	13229	38200	23936	54591	33744	27359	47605	36667.8	45393.4	0.807778	1.23796
3863	unkown5488	1	1	24	6	9512.71	0.990528	1	28	6.63e-05	350193	0.999955	1	26	3.25003	334466	6696.41	0.0200212	352998	372601	333871	341303	328880	388543	324392	306369	339454	288500	341383	363785	320986	317944	286193	342511	334357	413826	0.807966	1.23768
3500	unkown4923	1	1	18	6	15806.7	0.991075	1	20.5594	6.00001	193258	0.99996	1	19.2797	6.02655	172491	19622.1	0.113757	124997	213829	172302	161869	118622	184099	245806	224506	139274	149035	164201	202028	167523	120771	152277	181455	170162	210200	0.809527	1.23529
2739	unkown3709	0.380147	0.919777	24	6	159952	0.898445	1	28	6.63e-05	1.05519e+06	0.708455	1	26	3.25003	922275	143283	0.155358	709904	731548	1017537	1761771	1072095	750805	1124248	1254639	861344	699041	1031972	798961	668918	757607	763318	789983	924606	1.13833e+06	0.812248	1.23115
1112	unkown1810	0.0579045	0.352905	18	6	312484	0.915847	1	20	6	1.32245e+06	0.208779	1	19	6.01667	1.00835e+06	393516	0.390257	805783	501443	441167	642538	1850678	1218748	1078135	1142241	1055644	733529	770507	858683	1211683	1217425	959464	882944	960663	1181952	0.812777	1.23035
859	unkown1472	0.0579045	0.352905	18	3	29502.4	0.597879	1	20	6.63e-05	234940	0.151058	0.934528	19	1.58336	210787	33936.2	0.160997	310123	201868	225462	202307	223440	261183	214223	166377	179681	175749	160863	197261	250448	214450	227389	253857	216543	266329	0.813065	1.22991
2798	unkown3790	1	1	24	6	10142.7	0.999975	1	28	6.63e-05	122100	1	1	26	3.25003	107788	5434.8	0.0504212	38715	84729	148211	216744	78875	101461	117419	159780	84817	111668	117954	81632	108681	111126	102324	61887	107876	132638	0.813314	1.22954
1129	unkown1830	1	1	24	6	9620.54	0.999934	1	28	12	156085	1	1	26	8.82142	150231	3264.03	0.0217267	143582	143153	169819	189399	168412	175662	126844	126833	156913	127307	142175	197944	128808	163303	128742	119509	150525	185059	0.813391	1.22942
806	unkown140	1	1	24	6	27899.3	0.999008	1	25.5652	6.63e-05	738132	1	1	24.7826	3.09786	712850	17723.3	0.0248626	703591	714178	753970	780790	825988	735606	694490	636609	725120	646358	626499	767051	768340	719851	649353	658566	712898	875801	0.813995	1.22851
258	PE 38:3|PE 18:1_20:2	0.139706	0.540373	18	15	82279.7	0.979101	1	20	12	1209711	0.408901	1	19	13.6167	1.17073e+06	88987.4	0.0760103	1247831	1207842	1212985	1243307	1143941	1129208	1069049	1029033	1280917	1111063	1160473	1286391	1110674	1033581	1257473	1194096	1.16987e+06	1.43712e+06	0.814033	1.22845
719	unkown1270	0.235786	0.712255	18	6	102365	0.999999	1	20	6	625996	0.576457	1	19	6.01667	543586	104302	0.191877	485609	535280	305496	358839	879712	632023	482828	509419	576806	341041	357957	465971	660604	764491	491690	647379	530947	651424	0.815056	1.22691
3329	unkown463	0.587657	1	24	21	26773.5	0.841439	1	23.1496	17.9999	108366	0.842715	1	23.5748	19.4792	89097.5	21645.2	0.242938	131547	38316	129406	97281	44656	72750	57718	93454	135692	60229	65285	72190	107184	99142	124218	102919	89499.2	109759	0.815417	1.22637
2956	unkown4006	0.0787266	0.403933	18	6	194896	0.574787	1	20	6	945156	0.185327	1	19	6.01667	780435	145142	0.185976	796847	803698	806956	632761	553697	1032889	1080951	1113088	595583	364238	604304	746998	604755	810933	690688	967157	762846	935222	0.815685	1.22596
2549	unkown3473	0.475047	1	18	15	40067.9	0.992993	1	20	12	588804	0.826155	1	19	13.6167	543188	57724.3	0.106269	465770	590960	630580	533265	482172	497773	502583	574022	515901	611240	581971	646103	556896	490244	523640	478947	542629	663817	0.817438	1.22333
1758	unkown2627	0.380147	0.919777	24	9	19266.9	0.457408	1	20	5.99999	286118	0.478068	1	22	7.425	252806	25556.9	0.101093	212233	255471	264204	232812	229480	287759	309601	317631	236677	237425	262117	246384	268629	185924	227771	236463	250661	305376	0.82083	1.21828
2333	unkown3234	0.587657	1	24	18	66872.1	0.797797	1	24.9858	18	381484	0.823977	1	24.4929	18.0073	307141	68838	0.224125	219285	434361	356378	183906	326531	257637	192310	185931	301771	184417	300648	428288	447815	454084	326997	297043	306088	372646	0.82139	1.21745
4407	unkown847	0.587657	1	18	6	237961	0.997893	1	20	5.99998	3.35129e+06	0.899403	1	19	6.01666	3.11565e+06	232251	0.0745433	3613356	3269388	2716048	2424695	3517311	3710074	2766495	3411274	3493869	2744582	2604520	2600362	3413770	3387537	3120693	2606131	3.08751e+06	3.75826e+06	0.821525	1.21725
3040	unkown4219	0.380147	0.919777	18	6	1.15342e+06	0.868651	1	20	6	4.47964e+06	0.696098	1	19	6.01667	3.39118e+06	1.16949e+06	0.344864	3223811	3452444	1628091	2055213	2549351	5430599	5123435	4815185	2589888	1622211	2767259	2989489	2581369	3271048	2763345	5128592	3.24946e+06	3.95252e+06	0.822123	1.21636
1114	unkown1814	1	1	24	6	11336.9	1	1	28	6.63e-05	294246	1	1	26	3.25003	286130	2640.63	0.00922878	292313	296354	302819	285498	358972	305998	244942	245842	296882	236616	255509	360807	263628	285770	289578	255857	286087	347926	0.822263	1.21616
2402	unkown3326	1	1	18	12	10223.7	0.988823	1	24.8451	12	191786	0.999937	1	21.4225	12.3143	183757	6361.42	0.0346186	161347	184546	183468	166967	182808	206776	170745	158492	167046	180039	207754	212306	184906	182284	170130	213638	183328	222143	0.82527	1.21172
2345	unkown3249	1	1	18	6	29861.8	0.977554	1	20	6	274385	0.999746	1	19	6.01667	249485	22084.9	0.0885217	289625	202125	263070	229140	276127	343076	221058	257279	288145	155623	219691	214243	253016	281890	244012	210828	246809	298847	0.825871	1.21084
625	unkown1175	0.139706	0.540373	18	6	89049.8	0.9983	1	20	6	355005	0.41421	1	19	6.01666	275891	91629.6	0.332122	229099	285127	77457	184219	332080	487000	291857	309084	279030	123211	164851	263544	322731	211258	174189	501864	264788	319950	0.82759	1.20833
2665	unkown3604	0.873774	1	24	0	140409	0.945223	1	24.0327	6.63e-05	1.23481e+06	0.983882	1	24.0163	3.31e-05	1.11082e+06	174688	0.15726	1341693	954930	1535230	1107390	716612	1377307	1076513	979763	775373	1368938	955714	841231	1142894	1115472	1183240	1299323	1.11073e+06	1.33948e+06	0.82922	1.20595
425	TG 48:4 Isomer A	1	1	18	0	201144	0.99106	1	21.0501	17.9999	3.06409e+06	0.99996	1	19.5251	18.1105	2.90461e+06	189241	0.0651518	3628349	2624375	3268961	2858251	2907922	2517712	3048024	2445542	2972647	2433442	2830423	3275485	3105815	3558074	2494934	3097562	2.94172e+06	3.54704e+06	0.829345	1.20577
3493	unkown4914	1	1	24	12	4633.67	0.999939	1	23.9024	6.00002	63191	1	1	23.9512	8.99394	58436.3	4342.92	0.0743189	41679	73734	49858	62627	61980	69141	71243	50400	46482	54465	81199	57104	42866	55388	41113	75545	58426.5	70110.6	0.833347	1.19998
1621	unkown2475	1	1	24	0	14346.5	1	1	20	4.82e-05	608317	1	1	22	2.65e-05	602964	19369.4	0.0321236	552489	590919	559812	730047	728096	589914	594073	511331	483247	646568	657159	542123	534002	672076	636105	643759	604482	724987	0.833784	1.19935
3327	unkown4628	0.0787266	0.403933	24	6	25681.4	0.365297	1	24.0327	6.39e-05	228924	0.130818	0.863818	24.0163	3.00208	208715	26882.9	0.128802	255025	211791	221302	227577	222284	228029	257504	198081	208292	151499	197331	196886	180303	171305	176891	235346	208715	249718	0.835803	1.19645
3139	unkown4385	1	1	24	6	11606.1	0.994846	1	28	6.63e-05	166374	0.999987	1	26	3.25003	153861	2496.02	0.0162226	192582	129888	174440	168588	122995	166562	199090	136839	129604	159654	168100	141819	142867	137643	135758	154690	153820	183468	0.838404	1.19274
3440	unkown485	0.0787266	0.403933	18	6	182605	0.999664	1	20	6	541673	0.278765	1	19	6.01667	428064	139655	0.326248	487335	210708	152619	245229	421673	533809	539125	672086	416578	157483	304428	237436	674474	473620	571512	480132	411140	489446	0.840013	1.19046
1420	unkown2208	1	1	24	0	8626	0.999996	1	28	6	271084	1	1	26	2.78571	271594	19610.9	0.0722067	233630	274350	278510	273456	265462	250379	261242	307254	212905	269010	246006	315052	285708	249779	347231	277491	271717	322878	0.841546	1.18829
1461	unkown2265	0.0787266	0.403933	18	12	36737.7	0.646429	1	20	12	504323	0.202448	1	19	12.0333	463560	49099.6	0.105919	400091	508346	402056	466917	414000	504322	460939	469358	523438	465456	521812	506587	427306	478073	382858	392589	457759	542470	0.843842	1.18506
2930	unkown3947	1	1	18	0	12738.4	0.99962	1	28	12	128954	1	1	23	4.92857	126652	26533	0.209496	116431	164853	143884	166091	51410	126936	133191	128820	131695	119532	147188	117400	121769	91264	135410	139306	127199	150342	0.846064	1.18194
3364	unkown4706	0.380147	0.919777	24	15	27718.9	0.998044	1	28	18	266954	0.747105	1	26	16.4821	246810	25619	0.103801	232673	193868	290730	125019	273151	255930	247474	231517	323644	118723	302109	294993	249187	246190	300430	272011	247353	291235	0.849324	1.17741
933	unkown1567	1	1	18	0	29824.3	0.999999	1	28	12	401136	1	1	23	4.92857	395332	30017.2	0.0759289	372350	342555	564680	479759	383023	426007	384730	336323	531214	236106	298196	539026	370306	379481	338537	352929	395951	466013	0.849657	1.17695
1552	unkown2391	0.380147	0.919777	24	12	178323	0.888087	1	21.4599	12	5.44152e+06	0.704202	1	22.7299	12.0376	5.17357e+06	289010	0.0558628	5134916	5168186	4372850	5154791	5560723	4814129	4948068	5335778	5547656	5395999	5611250	5211161	5601586	4776215	5346508	4614451	5.16214e+06	6.0601e+06	0.851824	1.17395
803	unkown1395	0.105571	0.468626	18	15	95384.5	0.601899	1	20	12	625975	0.23867	1	19	13.6167	555900	116821	0.210148	599473	631617	590863	506464	355898	474840	469343	474870	775863	578098	438138	711802	514511	518307	572730	663478	554768	651187	0.851934	1.1738
3070	unkown4281	0.0787266	0.403933	24	3	35809.8	0.325194	1	20.5594	5.84e-05	149245	0.119434	0.827412	22.2797	1.39251	119567	41856.5	0.350067	123156	91533	201768	180524	87493	171788	153466	162039	60714	44843	92026	102729	120636	97155	102017	150384	121392	142150	0.853973	1.171
816	unkown1413	0.380147	0.919777	18	12	13832.8	0.998054	1	27.1385	12	178523	0.747108	1	22.5692	12.5129	155039	33349.7	0.215105	147280	172491	152163	163120	118131	187454	175319	132528	216789	109249	152592	235461	137690	103545	107445	149480	153796	180077	0.854057	1.17088
934	unkown1568	0.380147	0.919777	24	3	32142.2	0.777942	1	22.5575	6.63e-05	435268	0.656024	1	23.2788	1.45496	397876	41770.4	0.104983	380793	384925	524995	450361	379780	449492	477629	386533	381593	250933	345343	440425	413116	348673	397102	364389	398505	466586	0.854087	1.17084
885	unkown1500	0.105571	0.468626	18	6	87729.3	0.758511	1	20	6	463485	0.282251	1	19	6.01667	390576	68655.7	0.175781	432633	482536	236319	318427	367150	517840	448438	520513	360265	209373	282807	385486	368887	419904	327217	438300	382256	447329	0.85453	1.17023
2802	unkown3794	1	1	24	6	12857.7	0.96651	1	27.4766	6.63e-05	95604.7	0.999433	1	25.7383	3.21732	83196.6	7829.78	0.0941118	98310	134335	89908	59866	43976	113451	83772	119513	70850	84270	68949	72995	69513	66682	73737	82582	83294.3	96933.2	0.859296	1.16374
2925	unkown3938	0.719948	1	18	3	7664.68	0.922203	1	23.9024	17.9999	78670.2	0.935865	1	20.9512	20.1103	69018.3	11071.3	0.160411	70388	89991	100418	56873	18960	85529	73256	65271	59390	57796	61489	74760	73210	72598	77566	91307	70550.1	81812.6	0.862339	1.15964
2882	unkown3885	0.475047	1	18	0	33020.5	0.891296	1	28	12	127595	0.787292	1	23	4.92858	134479	33365.6	0.24811	190188	138562	200487	150878	54759	144173	138147	131955	131027	87832	153106	138414	109765	142515	111874	138993	135167	156700	0.862586	1.1593
3519	unkown4951	0.719948	1	18	0	21341.2	0.86503	1	24.5682	17.9999	453606	0.917703	1	21.2841	18.439	419870	27390.5	0.0652357	461689	464022	431518	372484	397634	437329	354446	398146	383707	452676	427133	374479	537453	429753	416337	430881	423105	488892	0.865438	1.15548
698	unkown125	0.587657	1	18	15	29989.1	0.818753	1	20	12	453216	0.833145	1	19	13.6167	418967	38108.4	0.0909581	398117	436187	393805	402890	353674	463278	390945	343376	476315	429566	408613	498370	435335	488879	350979	427236	418598	483375	0.86599	1.15475
2983	unkown4083	0.475047	1	18	6	805808	0.951087	1	20	6	3.20686e+06	0.810771	1	19	6.01667	2.42026e+06	851524	0.351831	2087678	2443648	1139561	1567469	1722734	3835228	4036329	3233147	1875557	1014806	1822951	2136738	2052531	2202718	1751375	4150722	2.31707e+06	2.67256e+06	0.866988	1.15342
4402	unkown835	0.587657	1	18	6	128411	0.995679	1	20	5.99998	1.02752e+06	0.898707	1	19	6.01666	933404	91086.7	0.0975855	1237288	688119	825308	848011	1075150	938666	967754	1128503	1131210	911154	683917	706658	1042115	869068	832213	872725	922366	1.06364e+06	0.867179	1.15316
3702	unkown5267	0.380147	0.919777	18	9	62754.3	0.850054	1	24.7059	6	1.08624e+06	0.688188	1	21.3529	7.93109	1.05078e+06	52644	0.0500997	892894	1049195	1047141	962892	939000	1131294	1109029	1165650	1035635	1089344	1151894	1038875	1031858	944847	1029513	1095049	1.04463e+06	1.20338e+06	0.868083	1.15196
4336	unkown722	0.235786	0.712255	18	6	2.16354e+06	0.982869	1	20	5.99999	14402126	0.570587	1	19	6.01666	1.28863e+07	1.72775e+06	0.134076	14000552	10588470	11375470	9845121	13939528	15046417	13306644	15315915	15719548	11041123	9357424	11149108	12238605	13980859	13457165	12469578	1.2677e+07	1.45804e+07	0.869453	1.15015
472	unkown1013	0.873774	1	24	6	137984	0.938211	1	23.7736	6.63e-05	1.38081e+06	0.982687	1	23.8868	2.98588	1.28669e+06	114510	0.0889957	1396860	1244612	1372745	1509028	1411315	1561045	1335501	1089530	1275197	994912	1275074	1214754	1118265	1596370	1097760	1094144	1.28669e+06	1.47139e+06	0.874475	1.14354
942	unkown1576	1	1	18	0	13222	0.983295	1	23.52	6.63e-05	108184	0.99986	1	20.76	2.93e-05	96576.2	12795.7	0.132493	116050	88247	119647	108794	106493	76500	96189	91002	98718	40253	67241	138051	113055	121311	98424	93192	98322.9	112430	0.874528	1.14347
60	FA 14:0 (myristic acid)	0.182589	0.628607	18	3	443286	0.818064	1	20	6.05e-05	3.76101e+06	0.43337	1	19	1.58336	3.50527e+06	581265	0.165826	4969758	3424744	3669459	2980069	3787180	4597843	3609207	2816058	3324016	2462021	2653483	3263306	4161636	3412664	4024011	4506072	3.60385e+06	4.1186e+06	0.875017	1.14284
1936	unkown2827	0.182589	0.628607	24	0	13739.1	0.723753	1	23.6461	6.63e-05	206029	0.399596	1	23.8231	3.34e-05	193947	16284.2	0.0839619	211572	225802	176990	209753	190245	205690	195224	164717	175030	181436	204230	163418	203587	212094	198527	186382	194044	221617	0.87558	1.1421
4251	unkown5979	1	1	24	0	156014	0.986729	1	25.8651	6.63e-05	1.13044e+06	0.999912	1	24.9326	3.2e-05	1.12734e+06	181508	0.161006	1275402	799461	1516196	930691	979020	1298561	1049908	918008	1002806	999930	1041040	1019082	1277409	1290165	944369	1615674	1.12236e+06	1.28139e+06	0.875892	1.14169
708	unkown126	0.105571	0.468626	18	15	1.85217e+06	0.789161	1	20	12	2.36085e+07	0.290356	1	19	13.6167	2.15682e+07	2.51014e+06	0.116382	21423710	23147023	21225457	21084144	19579740	22376546	19863452	18248797	25219559	20815222	22319362	26079852	20981669	23413368	18844465	20079205	2.15438e+07	2.45908e+07	0.876095	1.14143
3490	unkown4909	0.873774	1	18	12	9604.98	0.999971	1	20	12	239635	0.991672	1	19	12.0333	229920	11075.4	0.0481705	223485	258828	180863	233536	196577	247220	245423	226558	248118	200183	252459	257779	194106	222824	224075	245750	228612	260762	0.876706	1.14063
871	unkown1486	0.587657	1	18	15	62713.7	0.999973	1	20	12	188256	0.900054	1	19	13.6167	171673	62862.3	0.366174	210740	107511	359643	262687	237974	47295	71197	107857	143103	242069	215082	152770	197405	118069	208720	54908	171064	195019	0.877169	1.14003
770	unkown1354	0.0579045	0.352905	18	6	83670.4	0.99296	1	20	6.00001	420698	0.221709	1	19	6.01667	369898	56067.8	0.151576	476943	297863	248498	247981	416287	545239	370760	350508	337779	221785	280251	235109	501130	506408	392099	381025	363104	413352	0.878439	1.13838
1190	unkown1913	1	1	24	12	14501.3	0.998211	1	23.3952	12	248490	0.999998	1	23.6976	12.002	235225	18156.4	0.0771873	240014	240690	199184	229220	265545	271488	230959	195693	270651	214998	239825	268488	220450	257072	243839	172630	235047	266916	0.880602	1.13559
2678	unkown3620	1	1	18	0	324257	0.999988	1	20	12	4.54417e+06	1	1	19	15.2	4.36411e+06	448272	0.102718	4845654	5032171	5267623	4135006	2759203	4466128	4823935	4075719	4499419	4218659	5249671	4208928	4499409	3709444	4286795	4475049	4.40955e+06	4.99968e+06	0.881967	1.13383
1272	unkown2019	0.0579045	0.352905	18	12	72716.4	0.0727184	1	20	12	533268	0.0272439	0.359269	19	12.0333	449053	90872.9	0.202366	429240	412422	379353	417334	411552	463027	427377	366083	524265	483467	573413	551927	384500	428705	380635	379783	438318	496634	0.882577	1.13305
2943	unkown397	0.380147	0.919777	18	0	17007	0.999658	1	20	12	144131	0.747699	1	19	15.2	138649	28949.6	0.208797	133526	129732	253647	161276	86739	103926	116651	160694	188138	157243	111229	119913	126710	141313	129315	145287	141584	160416	0.882604	1.13301
1599	unkown2447	0.0787266	0.403933	18	0	25541.4	0.492594	1	28	12	66281.8	0.16481	0.977413	23	4.92857	73261.1	39278.6	0.536145	68779	165750	115226	129901	41751	70879	52737	51985	57669	66778	54223	86457	61550	67429	33076	60946	74071	83726.5	0.884678	1.13035
2001	unkown29	0.139706	0.540373	18	6	8.47278e+06	0.83539	1	20	6.00001	4.0056e+07	0.367409	1	19	6.01667	3.57959e+07	3.76637e+06	0.105218	50518727	23625179	30926517	31298412	49705314	46291403	27788267	36438977	33662052	20523036	16410093	23312329	45487155	48496794	41017910	39929675	35339490	3.99454e+07	0.884695	1.13033
2638	unkown3573	0.182589	0.628607	18	15	225431	0.707768	1	20	12	1.75024e+06	0.393657	1	19	13.6167	1.68211e+06	198077	0.117755	1863847	1790097	1672249	1906811	1424411	1615945	1328793	1472595	1850455	1410692	1696364	2043463	1763419	1503914	1793838	1746144	1.68019e+06	1.89313e+06	0.887522	1.12673
702	unkown1254	0.0579045	0.352905	18	0	54263.7	0.763555	1	20	12	404487	0.182103	1	19	15.2	380258	79874.3	0.210053	518061	495958	425612	358584	288450	357630	285230	331247	412611	376728	363255	465355	429085	350200	373638	382015	388354	437453	0.88776	1.12643
3818	unkown5434	0.475047	1	18	15	19001.4	0.9997	1	28	12	258263	0.828538	1	23	14.5119	253284	30291.4	0.119595	330736	289570	239462	250790	246589	239971	222195	235371	294277	227464	250085	261225	237829	235949	252702	236865	253192	285178	0.887841	1.12633
1109	unkown1808	1	1	18	9	20029.2	0.991366	1	20	6.00002	155440	0.999963	1	19	7.60001	138582	16873.8	0.12176	173023	101338	93703	99076	188633	167784	139882	125462	136384	132477	124525	146345	147803	153444	142374	91983	135265	152311	0.888083	1.12602
987	unkown1637	0.105571	0.468626	18	9	37914.4	0.86957	1	26.4865	6.00002	160254	0.311034	1	22.2432	8.08021	123864	31789.5	0.256648	110056	50862	52431	89076	231833	167560	103591	138030	163157	99923	127249	106568	129354	154808	110542	106523	121348	136634	0.888123	1.12597
3763	unkown5356	0.475047	1	24	9	50650.6	0.82852	1	25.2722	6	1.40806e+06	0.760588	1	24.6361	7.54376	1.35207e+06	56856.1	0.0420511	1184016	1476233	1420025	1319542	1446487	1474222	1341889	1369627	1319904	1372014	1401053	1399578	1311772	1389952	1250730	1180867	1.35362e+06	1.52373e+06	0.888361	1.12567
133	LPE-N (FA)33:1|LPE-N (FA 16:0)17:1	0.0787266	0.403933	24	18	131621	0.274278	1	21.5648	12	1.71652e+06	0.104411	0.768749	22.7824	14.8822	1.62162e+06	173729	0.107134	1563751	1653690	1440013	1617303	1702792	1480364	1345306	1420048	1746881	1567638	1692520	1859042	1839564	1702987	1692495	1629562	1.62212e+06	1.82466e+06	0.889002	1.12486
2701	unkown3654	0.139706	0.540373	18	0	286164	0.944363	1	20	12	2.04409e+06	0.399159	1	19	15.2	1.9654e+06	416668	0.212002	2374621	2145404	2986202	2149057	1203997	1798533	1926030	1692249	1899242	1881108	2159774	2236222	1783421	1748591	1963770	2173904	2.00763e+06	2.25767e+06	0.88925	1.12454
1907	unkown28	0.235786	0.712255	18	6	2.82675e+06	0.892811	1	20	6	1.257e+07	0.538536	1	19	6.01667	1.12121e+07	1.2927e+06	0.115295	15420600	6990518	9110854	9956298	14953402	14780390	9311780	11234333	10847740	6449661	5335560	7094350	14818011	15030788	13021957	12530644	1.10554e+07	1.24077e+07	0.891012	1.12232
1343	unkown2112	1	1	24	0	5360.93	0.999996	1	25.2722	17.9999	311547	1	1	24.6361	21.0915	297424	11253.7	0.0378372	228733	278123	375572	310268	250963	299188	295854	298827	296288	285701	296481	291341	291068	244294	357275	353551	297095	332775	0.892782	1.12009
559	unkown1109	0.0579045	0.352905	18	0	83011.5	0.970874	1	28	12	217027	0.218043	1	23	4.92857	192908	120923	0.626843	183531	342295	368790	302308	110289	107043	93837	165447	214426	288445	128710	236526	158545	144637	147860	133725	195401	218506	0.894259	1.11824
715	unkown1266	0.0579045	0.352905	18	6	17143.3	0.999084	1	28	6.00001	118224	0.222721	1	23	6.29762	104238	3248.85	0.0311676	97144	81304	57440	93623	141488	83897	151344	96166	88222	66938	71933	78566	134614	159760	144209	119372	104126	116174	0.896293	1.11571
4494	unkown976	0.719948	1	18	3	308346	0.999513	1	20	6	4.51164e+06	0.95639	1	19	4.43333	4.35721e+06	549017	0.126002	5406717	3834032	4261162	3362816	5311770	5051290	4209262	3474247	4784122	3392574	3043572	4028695	5056351	5251580	4625654	4504557	4.3499e+06	4.85155e+06	0.8966	1.11532
1312	unkown2071	1	1	18	3	33418.2	0.975491	1	21.253	6.63e-05	417100	0.999697	1	19.6265	1.63557	387262	26208.9	0.0676773	425983	355614	523932	362872	364396	441471	438446	382318	303125	384208	403265	322978	315425	340899	451124	438506	390910	435976	0.896632	1.11528
1139	unkown1841	1	1	18	0	13291.1	0.961279	1	28	12	240855	0.99924	1	23	4.92857	231444	2639.88	0.0114061	286480	279446	225487	238773	293074	241901	201083	208777	227261	259934	226553	249671	263001	233013	127221	142301	231498	257394	0.899392	1.11186
2177	unkown3075	0.139706	0.540373	18	3	264421	0.946943	1	28	6	1.27914e+06	0.399889	1	23	4.38095	1.21601e+06	231624	0.190478	1502049	843584	929068	1021230	1437655	1553123	1042591	1083193	1024759	596380	666085	1044904	2051904	1507092	1549463	1550632	1212732	1.34833e+06	0.899429	1.11182
1439	unkown2233	0.182589	0.628607	18	15	410677	0.990921	1	20	12	3.84269e+06	0.490258	1	19	13.6167	3.51723e+06	521452	0.148256	3730619	4122448	3800287	3331507	3500625	3338657	3156351	2721081	4108686	3613984	3331461	4316626	3473389	3490086	3064664	3094455	3.51218e+06	3.89362e+06	0.902036	1.1086
1674	unkown2540	0.301037	0.811038	24	12	111979	0.920262	1	20	12	1.4599e+06	0.632638	1	22	12.1	909345	533616	0.586813	463916	2014006	395211	554528	714613	555219	475636	662461	2220941	545373	884486	2188798	638692	623817	648558	459579	877865	972843	0.90237	1.10819
2885	unkown3888	1	1	18	0	31932.8	0.999991	1	20	12	531163	1	1	19	15.2	519314	44984.3	0.0866225	568905	504036	637774	550988	341421	582001	540131	477833	523777	491917	630010	478948	531507	441306	544243	537183	523874	580016	0.903206	1.10717
886	unkown1501	0.873774	1	18	6	26541.6	0.99952	1	20	6.00001	251072	0.991619	1	19	6.01667	229313	21703	0.0946439	244803	284295	126497	211767	223867	247837	267666	264917	230182	134481	172038	250541	247550	255130	183122	282228	226683	250946	0.903311	1.10704
2554	unkown3478	1	1	18	6	26929.8	0.997934	1	20.1831	6.00001	388448	0.999998	1	19.0915	6.01968	364682	18315.3	0.0502225	473624	274799	405140	330804	373403	446521	401222	332644	405409	296195	353108	303608	375964	349796	301514	375871	362476	400398	0.90529	1.10462
842	unkown1450	0.139706	0.540373	18	15	33113.1	0.343659	1	20	12	218638	0.193789	1	19	13.6167	166947	54632.4	0.327245	132603	158657	196600	127791	122897	145223	160969	100293	247482	163544	187504	276023	210269	142592	126093	164140	166418	183652	0.906154	1.10356
2767	unkown3740	0.873774	1	18	12	559264	0.999993	1	20	12	19592569	0.991675	1	19	12.0333	1.82123e+07	1.63133e+06	0.0895726	18147112	18666761	22662956	15490500	10902218	18380973	18298491	20379228	20903478	18917410	20841612	17707776	16800325	15953010	18533572	15728601	1.80196e+07	19865624	0.907076	1.10244
3042	unkown4220	0.873774	1	18	6	34425.8	0.892491	1	20	5.99999	169666	0.973759	1	19	6.01666	132048	40774.9	0.308789	132413	151961	59718	74764	90876	225175	160038	202573	122414	85100	82955	153668	123769	108227	115063	144992	127107	140063	0.907493	1.10194
2958	unkown401	1	1	18	12	7452.55	0.85169	1	20	12	108352	0.988414	1	19	12.0333	83121.8	25429.5	0.305931	73198	75439	68506	65021	79972	62916	55276	79044	156623	75241	158263	43281	82585	77686	70489	58343	80117.7	88274.8	0.907594	1.10181
3311	unkown4607	0.873774	1	24	3	12362.3	0.933595	1	28	6.63e-05	79445.9	0.981876	1	26	1.62503	62809.1	9229.28	0.146942	74170	76619	67839	99156	88566	74741	47534	40586	72248	29386	59347	51601	69138	88859	44551	17809	62634.4	68972.9	0.908101	1.1012
697	unkown1249	0.380147	0.919777	18	6	66044.7	0.994393	1	28	6	310271	0.745757	1	23	6.29762	268630	39885.6	0.148478	278730	162332	136411	195680	322130	364075	304342	250537	313781	187026	205531	266857	362403	330318	318071	277871	267256	293573	0.910357	1.09847
3900	unkown5532	1	1	18	3	3117.1	1	1	27.8233	5.96e-05	106669	1	1	22.9117	1.90933	102720	2278.04	0.0221772	109392	76029	144487	96770	120472	79695	83874	132076	98296	91316	103599	106843	81302	112497	102929	104618	102762	112821	0.910846	1.09788
4224	unkown5946	1	1	24	0	16622.8	0.999962	1	25.8651	17.9999	249318	1	1	24.9326	21.1418	229253	15285.8	0.0666766	332393	148418	247456	186912	216075	258513	174166	211631	278025	163449	224491	218831	221075	254924	246201	275074	228602	250977	0.910849	1.09788
1298	unkown2055	1	1	18	12	28601.9	0.99368	1	20	12	436680	0.99998	1	19	12.0333	401233	36716.2	0.0915084	310958	384385	412296	459616	453509	355008	376828	322279	448434	415132	395003	488149	438575	443898	334896	311360	396895	435539	0.911274	1.09736
67	FA 18:0;(2OH)	1	1	18	9	133709	0.998628	1	28	6.00001	800658	0.999999	1	23	8.21429	741332	61663.7	0.0831796	634846	770472	453676	497456	1170617	764054	753558	514404	972703	433497	662868	959188	838417	867134	702649	820871	738526	809829	0.911953	1.09655
1630	unkown2487	0.235786	0.712255	18	15	33651.2	0.650532	1	20	12	268116	0.440955	1	19	13.6167	203510	64809.8	0.31846	209394	184132	222595	163304	212088	134879	164470	203148	271180	187644	278666	334973	175871	159274	249373	95124	202882	222334	0.91251	1.09588
887	unkown1502	1	1	18	9	144532	1	1	20	6.00001	1735400	1	1	19	7.60001	1.6242e+06	113969	0.0701692	1585849	2111676	934884	1293485	1493961	1929785	1725559	1792295	2198664	932087	1241295	2047836	1320146	1786746	1332188	1902299	1.6018e+06	1.75455e+06	0.912937	1.09537
562	unkown1111	0.380147	0.919777	18	6	325544	0.996615	1	28	6.00001	1.34899e+06	0.746578	1	23	6.29762	1.17228e+06	104224	0.0889078	1198357	774789	667508	582679	1452490	1639087	1176699	1127695	1269981	716108	628033	1061885	2050337	1729111	1377867	1246327	1.16868e+06	1.28011e+06	0.912954	1.09535
839	unkown1447	0.0579045	0.352905	18	15	14192.3	0.229565	1	20	12	145722	0.0707251	0.622989	19	13.6167	101465	43327.3	0.427018	82266	97630	98715	67033	82478	85736	81161	57359	190122	92364	110100	190300	109830	89597	97143	84888	101045	110423	0.91507	1.09281
2656	unkown3594	0.235786	0.712255	18	12	58744.1	0.990082	1	20	12	494264	0.573067	1	19	12.0333	420308	84208.9	0.200351	432732	401370	518421	346022	157038	456348	488148	371466	508935	442653	537483	487983	365502	237534	384319	429806	410360	447586	0.91683	1.09071
4343	unkown736	1	1	18	3	195000	0.999666	1	20	5.99999	2.58599e+06	1	1	19	4.43333	2.50881e+06	172909	0.0689209	2650274	1703659	3508213	2475916	2604672	2700729	2233697	2804875	2565695	2364551	2239545	1988167	2822361	2262062	2541740	2637954	2.50651e+06	2732501	0.917294	1.09016
3819	unkown5435	0.0579045	0.352905	18	0	78157.9	0.661788	1	26.9725	17.9999	987818	0.163313	0.971693	22.4862	18.7462	992240	61811.6	0.062295	1062792	1075324	1159306	1027607	891445	939339	927519	987568	982357	951240	1073121	910745	1003492	955990	927061	1064729	996227	1.08598e+06	0.917351	1.0901
3765	unkown5358	0.475047	1	18	15	50942.1	1	1	28	12	925717	0.828644	1	23	14.5119	901039	85758.9	0.0951778	897566	971468	1023871	915739	879387	843774	861640	861660	918488	868245	951508	964628	913675	799783	1016760	724275	900779	981840	0.91744	1.08999
2044	unkown2947	0.235786	0.712255	24	18	7077.96	0.78611	1	26.8085	17.9999	136412	0.497766	1	25.4043	18.0551	125128	7223.58	0.0577295	119217	124603	121061	110461	123468	122554	138926	79566	119158	129673	136490	126643	129900	149030	141861	124858	124842	136075	0.917446	1.08998
701	unkown1253	0.301037	0.811038	18	6	204731	0.999966	1	20	6	745790	0.662427	1	19	6.01667	623880	156006	0.250058	712864	292881	310846	417081	709669	895664	813337	564492	467734	421243	459682	417521	914535	817028	819960	645067	604975	657348	0.920328	1.08657
1914	unkown2806	0.0579045	0.352905	18	0	555937	0.676804	1	28	12	8264525	0.16614	0.983319	23	4.92856	8.34753e+06	664142	0.0795615	8755847	9030247	9310461	8972225	8339404	7966107	7997979	7649651	8450575	7912835	8316887	8377803	8853650	8556938	7389186	7899842	8.36123e+06	9.07312e+06	0.921538	1.08514
1333	unkown2098	0.301037	0.811038	24	9	98768.7	0.996618	1	20	6.00001	1.00292e+06	0.661215	1	22	7.425	865981	81140.5	0.0936977	835396	928054	782243	787324	1250501	969239	830680	961247	1171944	852812	168984	1003368	931154	817682	761230	694885	859171	930695	0.923151	1.08325
2169	unkown3068	0.105571	0.468626	18	3	79250.8	0.836015	1	28	6	673069	0.302505	1	23	4.38095	670356	82444.5	0.122986	923963	499001	428844	525727	650135	810349	558127	673664	539203	332756	488388	589082	978017	840311	860796	1008647	669188	722546	0.926153	1.07973
4431	unkown884	0.475047	1	18	9	124235	0.806018	1	28	6	277885	0.750474	1	23	8.21429	220813	53434.9	0.241992	164693	86477	24840	40840	393490	284978	215336	217735	37811	370413	258469	242941	283964	350764	316881	204460	218381	234980	0.929358	1.07601
4376	unkown791	0.0579045	0.352905	18	6	511149	0.977041	1	20	6.00001	1497999	0.219069	1	19	6.01667	1.13277e+06	441210	0.389495	1213228	667039	300493	618488	1622116	1664424	1348112	1357344	1454305	867882	532375	641221	1131175	1481771	1353366	1015582	1.07931e+06	1159688	0.930688	1.07447
3739	unkown532	0.0579045	0.352905	18	12	309598	0.270186	1	20	12	1.46454e+06	0.0806906	0.668124	19	12.0333	1.13744e+06	330652	0.290699	1113113	812882	1162105	918383	447351	942787	1146583	1206217	1675914	1276854	1395349	1510034	1091463	791186	1095160	988657	1.09838e+06	1.18007e+06	0.930773	1.07438
4226	unkown5948	1	1	24	18	14691.4	1	1	20.5594	17.9999	265467	1	1	22.2797	18.1079	256200	9397.48	0.0366803	360568	159346	334949	176669	221366	306242	236020	209098	271911	195925	257581	317785	271534	293821	221044	275468	256833	275382	0.932644	1.07222
1346	unkown2116	0.873774	1	18	6	33771.2	0.999904	1	20	6	625876	0.991664	1	19	6.01667	614532	12059	0.019623	652717	500634	637066	603322	518763	618395	661878	704467	483393	613387	657088	461825	644785	510505	779980	760931	613071	657216	0.932831	1.07201
882	unkown1499	0.380147	0.919777	18	6	472975	0.982773	1	20	6	3.03007e+06	0.741434	1	19	6.01667	2.61086e+06	457434	0.175204	2622777	2972830	1473726	2059198	2324603	3357814	3159469	3278399	2648225	1485547	2298468	2737791	2383915	2708487	2240880	3134745	2.55543e+06	2.73444e+06	0.934536	1.07005
1236	unkown1979	1	1	18	12	8556.35	0.99994	1	21.253	12	203420	1	1	19.6265	12.083	196638	5190.87	0.0263981	198947	192460	165912	207999	171720	210312	221079	159207	187339	196527	217543	212270	208226	176388	221263	190014	196075	209516	0.935849	1.06855
2929	unkown3945	0.105571	0.468626	18	0	20150.8	0.789226	1	20	12	110458	0.290374	1	19	15.2	102260	29390.5	0.287409	141288	122943	145974	95625	45807	85527	82821	97529	86435	117127	138174	100096	100000	84516	125276	114687	105239	112366	0.936576	1.06772
3635	unkown5186	0.587657	1	24	15	9899.14	0.990024	1	28	17.9999	151308	0.896916	1	26	16.4821	143212	2036.04	0.014217	128297	140500	117104	143380	123361	142672	149379	149691	132432	180844	166060	113123	132321	149838	164228	158847	143255	152955	0.936584	1.06771
3343	unkown4655	1	1	18	3	12879.6	1	1	28	17.9999	238355	1	1	23	9.3095	222878	5390.13	0.0241842	230183	260109	126164	245844	283215	250248	213807	127333	173502	190284	221528	294419	263888	218996	244205	226333	223129	238102	0.937115	1.06711
61	FA 14:1 (physeteric acid)	0.0579045	0.352905	18	6	2.27907e+06	0.991717	1	20	6.00001	11602667	0.221504	1	19	6.01667	1.03505e+07	1.44229e+06	0.139345	12879678	7166450	7315031	7817551	12985742	13870827	9965687	9588412	9307029	6124349	7800656	6668178	14545804	13033358	11600994	12141325	1.01757e+07	1.08376e+07	0.938925	1.06505
2578	unkown3501	1	1	24	18	5109.73	1	1	20	17.9999	327464	1	1	22	18.15	323484	4783.39	0.0147871	423603	235798	326687	313404	321481	354824	309480	277559	316438	299497	321005	372277	357888	343549	292833	315586	323869	344694	0.939586	1.0643
1937	unkown2828	1	1	24	6	8398.66	0.999966	1	28	12	507064	1	1	26	8.82143	498812	9616.07	0.019278	488427	513845	539260	493146	434463	574348	536851	474681	489503	494047	543609	501095	502977	420824	525041	462736	499678	531722	0.939737	1.06413
3771	unkown537	0.301037	0.811038	18	6	287671	0.993242	1	20	6.00001	1.37622e+06	0.65999	1	19	6.01667	1.21575e+06	175686	0.144508	1625015	852845	782816	943780	1170133	1707642	1188780	1438319	1283172	841128	505774	826733	1497765	1595661	1619420	1232370	1.19446e+06	1.27085e+06	0.939894	1.06395
3096	unkown4321	0.235786	0.712255	18	3	10621.8	0.455147	1	20	6.38e-05	60694.7	0.346846	1	19	1.58336	51979.4	10991.3	0.211455	68050	54566	73951	46212	61050	61453	38135	53708	38855	35047	33041	58761	61793	60282	59284	57307	53843.4	57197	0.941368	1.06228
[truncated: 412 more rows]

## Sheet: unique cycling in AS
ID	CycID	JTK_pvalue	JTK_BH.Q	JTK_period	JTK_adjphase	JTK_amplitude	LS_pvalue	LS_BH.Q	LS_period	LS_adjphase	LS_amplitude	meta2d_pvalue	meta2d_BH.Q	meta2d_period	meta2d_phase	meta2d_Base	meta2d_AMP	meta2d_rAMP	X0	X0.1	X0.2	X0.3	X6	X6.1	X6.2	X6.3	X12	X12.1	X12.2	X12.3	X18	X18.1	X18.2	X18.3	AS
[truncated: 281 more rows]

[truncated: 6 more sheets: unique cycling AS in AM, shared cycling in AM and AS  , 0.5AM-Lipids, 0.5AS-Lipids, Total AM, Total AS]
