# Supplementary material for: The microbiome interacts with the circadian clock and dietary composition to regulate metabolite cycling in the Drosophila gut
Source: eLife journal article supplement (doi:10.7554/elife.97130), 2024-05-01
Supplement: supp1 [file Table9-Biogenic amines-AM versus AS.xlsx]

## Sheet: unique cycling in AM
ID	CycID	JTK_pvalue	JTK_BH.Q	JTK_period	JTK_adjphase	JTK_amplitude	LS_pvalue	LS_BH.Q	LS_period	LS_adjphase	LS_amplitude	meta2d_pvalue	meta2d_BH.Q	meta2d_period	meta2d_phase	meta2d_Base	meta2d_AMP	meta2d_rAMP	X0	X0.1	X0.2	X0.3	X6	X6.1	X6.2	X6.3	X12	X12.1	X12.2	X12.3	X18	X18.1	X18.2	X18.3	AM
1	(-)-Riboflavin	0.0299489	0.0829149	24	12	2019.85	0.208098	1	26.0177	12	9889.5	0.0378801	0.117916	25.0088	12.0196	7927.4	2062.15	0.26013	5732	5779	5444	4628	8956	9034	6311	8970	10676	11065	9927	7890	5474	7074	8989	11995	7996.5
2	(-)-Syringaresinol-4-O-.beta.-D-glucopyranoside	0.000572095	0.00471842	18	6	497.45	0.644621	1	20	6	1495.5	0.00328413	0.0180004	19	6.01667	1070.39	473.63	0.442482	811	410	640	914	1701	1630	1224	1427	658	602	1010	493	1184	1286	1028	1190	1013
4	(3-Carboxypropyl)trimethylammonium cation	0.0065055	0.0255615	18	6	1085.41	0.47745	1	20	6.00002	5947.5	0.0210416	0.0749879	19	6.01667	4971.99	1119.66	0.225194	3734	4039	4277	4118	6118	5955	5168	6549	4808	3978	4986	3862	5147	4968	4391	5283	4836.31
7	1,4-Butynediol	0.0299489	0.0829149	18	6	377.418	0.667412	1	20	6	1945.5	0.0981946	0.256134	19	6.01667	1565.08	329.217	0.210351	1133	1551	1092	2367	1600	2471	1236	2475	1078	999	1334	896	1354	1396	1508	1913	1525.19
14	1-Methyladenosine	0.0419656	0.10784	24	12	100.056	0.438744	1	23.9024	12	967	0.0919641	0.243273	23.9512	12.0001	866.498	116.587	0.13455	715	875	715	768	935	1017	717	890	959	858	1082	969	844	834	716	967	866.312
19	2,8-Quinolinediol	0.000987235	0.00692825	18	6	301.227	0.607436	1	20	6	1144	0.00504879	0.0245356	19	6.01667	882.035	275.186	0.31199	841	620	625	714	1264	1258	844	1210	665	457	833	428	942	1105	803	970	848.688
27	2-Phenylacetamide	0.0144977	0.0475569	24	9	480.833	0.365726	1	23.9024	6	1628.75	0.0330837	0.106827	23.9512	7.49698	1123.82	484.435	0.43106	592	2103	660	656	2352	1646	1399	1118	1003	1569	1114	1273	852	451	472	705	1122.81
28	3-(2-Pyrimidinyl)propanoic acid	0.0210199	0.0632056	18	15	2752.41	0.743624	1	20	12	11252	0.080632	0.218031	19	13.6167	8914.85	3095.34	0.347212	11621	11318	5884	9274	7320	7241	6383	7245	8897	10787	13151	12173	7257	7100	8114	8393	8884.88
30	3.alpha.-Galactobiose-CH3	4.22e-05	0.00116331	18	6	2697.26	0.236644	1	20	6	7106	0.000124918	0.00288314	19	6.01667	5239.27	1768.67	0.33758	6026	4876	3417	3617	7589	7781	6845	6209	2226	2332	2958	1989	6303	6985	4923	6323	5024.94
41	3-Hydroxypropanoic acid	0.00164724	0.00965163	18	9	2626.37	0.146154	0.966499	24.2975	6	14278.5	0.00224663	0.0140577	21.1488	7.89841	12339.9	2270.01	0.183957	9371	11305	9044	9200	12711	15502	14352	14549	11393	15824	13484	11274	10956	11630	11334	10967	12056
46	3-Methylhexahydropyrrolo[1,2-a]pyrazine-1,4-dione	0.0210199	0.0632056	24	12	2417.24	0.150362	0.966499	21.8859	12	10020.5	0.0213561	0.0755488	22.9429	12.0255	7367.71	3228.33	0.438172	6463	5941	4502	4328	7947	10140	5253	8137	10692	9045	12717	7628	6009	5653	3911	7798	7260.25
49	3'-O-Methylinosine	0.0299489	0.0829149	18	9	433.456	0.729642	1	26.4865	6.00001	1665.25	0.105402	0.270214	22.2432	8.0802	1310.68	301.469	0.230011	893	749	938	808	1436	1998	1163	2064	1177	1320	1629	1083	1282	1262	1277	1510	1286.81
55	4-Hydroxybenzoic acid	0.00164724	0.00965163	24	12	1926.87	0.10981	0.946907	24.0327	12	10053.2	0.00173967	0.0117347	24.0163	12	8258.61	2252.61	0.272758	5704	6425	6957	6607	7512	10048	7404	10866	10728	8217	11147	10121	6522	7133	7802	8964	8259.81
59	4-Nitrophenol	0.00980952	0.0347873	24	9	14989.4	0.47954	1	24.2975	6	49847.2	0.0299147	0.0989538	24.1488	7.50952	33225.7	15098.9	0.454434	15496	69688	19865	20562	76066	51605	39049	32669	24137	52956	30502	36652	22682	9999	12576	18644	33321.8
62	5-Methoxy-3-indoleacetic acid	8.77e-05	0.00171035	18	6	566.746	0.672774	1	20	6.00001	2208.75	0.000633497	0.00640898	19	6.01667	1660.62	593.047	0.357125	1373	1047	1065	1375	2610	2288	1656	2281	1017	1039	1317	766	1877	2178	1671	1860	1588.75
65	5'-S-Methyl-5'-thioadenosine	0.0419656	0.10784	24	12	1528.23	0.145272	0.966499	20	12	11449.5	0.0371886	0.116265	22	12.1	8662.73	3040.17	0.350948	6812	8012	6411	7162	9271	9144	5685	8587	13105	11815	13009	7869	6468	8221	6995	7168	8483.38
66	6-Hydroxycaproic acid	0.0419656	0.10784	18	9	809.637	0.669557	1	24.8451	6	5658.5	0.128467	0.317501	21.4225	7.94237	5120.7	751.223	0.146703	4417	4388	3711	4321	5880	7305	4424	5025	4600	5390	6875	5073	4099	4932	4396	5725	5035.06
85	Ala-Asn	0.000320124	0.00340574	24	12	1635.54	0.0193175	0.9295	23.9024	12	7310.5	8.04e-05	0.00235269	23.9512	12	5925.53	2020.66	0.341008	4471	5369	4383	4287	7659	6814	6335	6605	6595	7472	7235	7940	4555	4597	4683	5757	5922.31
87	Ala-Gln	0.00164724	0.00965163	24	12	3796.81	0.0381988	0.9295	23.9024	12	17250.5	0.000671611	0.00657936	23.9512	12	14207.8	4550.63	0.320292	11978	14022	9252	10445	17754	17455	14989	15385	15273	17588	18305	17836	11450	9960	11248	14268	14200.5
94	Ala-Leu-Lys	0.00421867	0.0189687	24	0	2760.9	0.316527	1	23.9024	6.73e-05	13375.5	0.0101733	0.0422341	23.9512	3.37e-05	10140.2	3602.78	0.355296	13788	19543	8034	12137	10662	12274	7945	7747	7647	6417	6250	7127	13421	11660	7829	9855	10146
102	Ala-Trp	0.0419656	0.10784	24	12	1101.32	0.165098	0.980144	23.9024	12	6661	0.0413774	0.12636	23.9512	12	5839.72	1272.16	0.217846	5225	6200	4132	4886	7290	7102	5253	6317	6422	6909	6660	6653	5362	4647	4271	6074	5837.69
106	Allantoin	0.0210199	0.0632056	24	9	8674.79	0.15468	0.97563	23.9024	6.00002	34494.2	0.0218774	0.0768904	23.9512	7.49699	27267.9	9117.28	0.33436	18787	18711	24890	26134	25647	37028	30793	44509	28489	31711	37280	31017	15435	16996	17066	31489	27248.9
114	Arg-Leu	0.000320124	0.00340574	18	6	2047.78	0.179378	0.991961	20	6	12301.2	0.000618164	0.0063172	19	6.01667	10302.5	1878.72	0.182357	10151	10180	9066	9212	13270	14034	9655	12246	8023	7694	8324	7550	10691	10268	9721	11112	10074.8
115	Arg-Phe	0.0419656	0.10784	18	6	8810.9	0.710386	1	20	5.99999	63958.8	0.134536	0.328192	19	6.01666	56180.6	7726.41	0.137528	57503	49995	45648	56286	68642	72207	52426	62560	54328	47473	47358	42208	57971	62677	43977	62650	55244.3
118	Arg-Trp	0.00421867	0.0189687	18	9	4179	0.176074	0.990633	24.9858	6.00001	22445.8	0.00609473	0.028685	21.4929	7.95385	19414.1	3743.34	0.192815	13656	13709	14827	16823	24996	25343	19245	20199	19672	23651	20911	18932	16146	19439	15651	20771	18998.2
119	Arg-Val	0.0065055	0.0255615	18	9	711.349	0.133315	0.964981	20	6	5865.25	0.00698172	0.0315387	19	7.6	4882.13	863.887	0.176949	4275	5047	3591	3641	6790	6057	5063	5551	4174	4863	4603	4672	4636	4105	3840	4489	4712.31
120	Asn-Ala	0.00980952	0.0347873	18	9	2484.95	0.107227	0.946907	24.0327	6	11521.5	0.00826458	0.0358472	21.0163	7.87756	9760.71	2543.07	0.260542	7035	9829	5631	6555	13358	13620	9927	9181	9661	11930	11612	10985	8425	8311	6246	8563	9429.31
131	Asn-Val	0.0144977	0.0475569	24	12	7009.37	0.112877	0.946907	23.7736	12	33053	0.0121347	0.0486061	23.8868	12.0003	26674.1	8966.92	0.336166	22202	27786	15260	18483	33292	37015	25230	25868	28997	36925	34278	32012	25253	21718	16967	24970	26641
132	Asn-Val-Lys	0.0299489	0.0829149	24	3	1934.82	0.335283	1	21.6708	6.53e-05	10510.2	0.0562421	0.161277	22.8354	1.42725	8037.28	3488.71	0.434066	11089	14649	6616	9687	9491	11074	6283	7315	5830	4699	4648	4837	12531	8356	5533	7445	8130.19
138	Asp-Ile	0.000320124	0.00340574	24	12	8316.28	0.0326759	0.9295	22.4427	12	37993.8	0.000130419	0.00295662	23.2214	12.0135	29217.5	11062.8	0.378635	22309	26941	19327	21253	35440	34934	28549	27627	32293	39402	39745	40535	23681	23934	20530	26583	28942.7
140	Asp-phe	0.000987235	0.00692825	24	12	2891.36	0.0793869	0.9295	20	12	17266.5	0.000819318	0.00750031	22	12.1	13627.8	4390.7	0.322187	11365	14688	8261	9928	15573	15323	12596	12035	15335	18026	18205	17500	11433	11612	9630	12390	13368.8
142	Asp-Tyr	0.00164724	0.00965163	24	12	1064.9	0.0965782	0.945467	22.1053	12	5123	0.00155048	0.0109164	23.0526	12.0203	4023.21	1380.08	0.34303	2995	4262	2622	2900	5066	4465	4265	3392	4595	5964	4543	5390	3103	3517	2840	3790	3981.81
143	Asp-Val	0.000572095	0.00471842	24	12	2944.92	0.0308406	0.9295	22.5575	12	12273.5	0.000210757	0.0037248	23.2788	12.0115	9348.61	3722.63	0.398201	6949	8986	6416	6204	11563	11126	9519	8632	11440	13374	12372	11908	7448	8011	6116	8140	9262.75
144	Benthiavalicarb-isopropyl	0.00267199	0.0134688	18	12	359.387	0.0234938	0.9295	24.0327	12	3070.5	0.000670187	0.00657936	21.0163	12.2524	2612.49	696.822	0.266727	2359	2392	1667	2062	3179	3141	2746	2902	2923	3098	3279	2982	2274	2050	1719	2160	2558.31
145	Benzoic acid	0.0210199	0.0632056	18	6	4153.19	0.220766	1	20	6	14669.2	0.0295734	0.0981249	19	6.01667	11111.5	3141.23	0.282702	14418	6084	8973	13392	15253	15058	12018	16348	6205	9740	7469	5210	9784	9444	8452	13845	10730.8
148	Betaine aldehyde cation	0.00164724	0.00965163	18	12	767.564	0.0714019	0.9295	23.6461	12	6382.75	0.00118182	0.0091872	20.8231	12.2247	5284.48	1530.9	0.289697	4952	4523	3211	4379	5589	5867	5362	6570	6867	5820	7636	5208	4377	4140	3516	4514	5158.19
161	Cirsimarin	0.0299489	0.0829149	18	6	99.8788	0.941653	1	20	5.99998	802.75	0.128835	0.318048	19	6.01666	464.365	319.688	0.688441	207	870	143	255	2151	294	445	321	204	195	151	183	416	411	331	233	425.625
162	Citraconic acid	0.00980952	0.0347873	18	6	2084.9	0.598402	1	20	6	8976	0.0360297	0.113626	19	6.01667	6774.21	2064.23	0.304719	4817	4832	4937	9845	7443	11438	5731	11292	4103	3992	5931	3254	5335	6241	6139	9055	6524.06
163	Citrulline	0.0065055	0.0255615	18	6	117.91	0.815728	1	20	6	609.75	0.0331074	0.106827	19	6.01667	483.896	141.493	0.292403	379	355	404	343	616	573	449	801	423	326	488	307	444	450	560	550	466.75
164	CMPF	0.00980952	0.0347873	18	9	241.477	0.94565	1	20	12	1203.25	0.0526925	0.153745	19	10.45	596.084	591.671	0.992598	100	87	75	81	1258	464	129	154	262	4017	426	108	99	123	171	138	480.75
165	Coniferylaldehyde	0.000171384	0.00241724	18	9	534.926	0.212838	1	20	6	1822	0.00040923	0.00506276	19	7.6	1172.01	586.641	0.500544	489	497	472	638	2537	2017	1475	1259	567	1176	1223	887	850	892	787	1141	1056.69
166	Cotinine	0.00980952	0.0347873	24	9	208.243	0.984019	1	22.9091	5.99999	3878.75	0.0544465	0.157379	23.4545	7.46915	1919.34	2124.91	1.10711	464	644	566	477	13325	807	768	615	623	8313	735	775	341	360	677	429	1869.94
170	Cyclo(Leu-Pro)	0.0210199	0.0632056	24	12	2935.02	0.149728	0.966499	20.2759	12	14934.2	0.0212793	0.0753388	22.1379	12.0855	11310.8	3994.34	0.353144	10984	8555	6578	8393	12207	13580	7913	10478	15143	15203	16601	12790	10106	9273	6214	13402	11088.8
173	Cystine	0.00980952	0.0347873	18	15	2922.83	0.997918	1	20	12	11654.5	0.0550782	0.158887	19	13.6167	9590.75	3885.96	0.405177	10640	18880	7910	9815	8010	7333	6923	4799	9007	13108	9581	14922	8723	8576	8322	6301	9553.12
179	Disaccharide 01	0.000171384	0.00241724	18	6	2455.61	0.412306	1	20	6.00002	9879	0.000746029	0.0070685	19	6.01667	7802.5	2083.13	0.266983	7622	6217	5352	7430	10437	10907	7544	10628	5207	4664	6208	4849	9543	9261	7228	7704	7550.06
180	Disaccharide 02	0.00164724	0.00965163	18	6	3280.98	0.381959	1	20	6.00001	14504.8	0.00526692	0.0253024	19	6.01667	11605.7	2862.17	0.246618	12186	10093	8581	9870	16594	16272	11708	13445	8227	7610	10002	6651	13315	13495	9929	12164	11258.9
182	Disaccharide 04	0.000572095	0.00471842	18	6	6887.75	0.375516	1	20	6	31612.5	0.00202922	0.0129978	19	6.01667	26314.8	5400.45	0.205225	24549	19697	21586	27381	30922	30442	31648	33438	20633	20720	26264	16810	26838	29199	22560	27879	25660.4
184	Disaccharide 06	0.000171384	0.00241724	18	6	34073.2	0.185085	0.994309	20	6	107993	0.0003603	0.00464978	19	6.01667	72401	36106.2	0.498697	56637	68617	44973	42828	113970	131425	79320	107258	48867	32549	49777	30400	63500	89115	59332	69843	68025.7
185	Disaccharide 07	7.77e-06	0.000473861	18	6	22907.4	0.132474	0.964981	20	6	70256.2	1.52e-05	0.00108038	19	6.01667	47643.7	22800.2	0.478555	38452	43362	32051	29567	72045	76937	53970	78073	31105	22070	31797	21424	41372	52313	44044	49511	44880.8
186	Disaccharide 08	7.77e-06	0.000473861	18	6	661.145	0.263114	1	20	6.00001	2044.25	2.88e-05	0.00148595	19	6.01667	1503.71	530.422	0.352741	1486	1219	1035	1206	2091	2161	1914	2011	725	695	1106	561	1872	1682	1284	1983	1439.44
191	Disaccharide 13	4.22e-05	0.00116331	18	6	12362.9	0.171883	0.981551	20	6	40392.8	9.31e-05	0.00245256	19	6.01667	27615.4	13011.1	0.471152	23667	23689	17599	17047	41348	45074	30042	45107	18211	13154	19156	12179	24998	30274	26292	28783	26038.8
192	Disaccharide 14	2.89e-06	0.00035704	18	6	2712.46	0.143418	0.966499	20	6.00001	7413.25	6.5e-06	0.000803812	19	6.01667	4143.19	3367.44	0.812765	2462	2711	2165	1692	6498	9129	4885	9141	2072	1072	2006	869	2954	4659	3728	3719	3735.12
195	D-myo-Inositol, 1-[2-hydroxy-3-[(1-oxo-9,12-octadecadienyl)oxy]propyl hydrogen phosphate], [S-(Z,Z)]-	7.77e-06	0.000473861	18	6	48556	0.0877531	0.931721	20	6	83399.2	1.04e-05	0.000967577	19	6.01667	40474	45277	1.11867	14953	12634	12103	10464	81090	86706	88471	77330	6456	8339	13188	9823	53038	29223	30183	25796	34987.3
198	Donepezil	0.0210199	0.0632056	18	0	459.796	0.403839	1	23.9024	17.9999	4655.75	0.0489712	0.145436	20.9512	18.3644	4178.53	746.515	0.178655	4649	6625	4010	4564	3919	4078	2971	3380	3804	3591	4080	4153	4424	5122	3999	5078	4277.94
199	Eicosenoic acid	0.00267199	0.0134688	18	6	232.992	0.336166	1	20	6.00001	743	0.00719941	0.032204	19	6.01667	510.036	239.609	0.469789	390	535	261	305	830	911	587	644	216	311	387	275	702	501	372	469	481
200	Enrofloxacin	0.000171384	0.00241724	18	6	443.002	0.477407	1	20	6	1451.25	0.000851827	0.00766885	19	6.01667	1001.88	483.348	0.482439	844	332	646	836	1034	1652	1423	1696	538	708	636	523	1317	1070	855	983	943.312
202	Erythronolactone	8.77e-05	0.00171035	18	6	3825.09	0.180214	0.993547	20	6.00001	16085.8	0.00019051	0.00356102	19	6.01667	12642.7	3553.28	0.281054	11148	10675	9889	10680	16732	16203	14934	16474	9737	8585	11630	8700	11765	15205	11179	11858	12212.1
206	Galactosamine	0.00267199	0.0134688	18	6	707.814	0.767045	1	20	6	4183	0.0147365	0.0567191	19	6.01667	3524.31	724.102	0.205459	3068	3254	2525	3000	4387	4619	3802	3924	2772	2938	3196	2508	3999	4265	3006	3722	3436.56
229	Glucuronic acid	0.0065055	0.0255615	18	3	120.208	0.25616	1	20	6.56e-05	1024.25	0.0123268	0.0491484	19	1.58336	916.112	162.964	0.177886	1058	1276	838	925	1012	892	883	944	808	647	748	864	1078	1053	962	1112	943.75
234	Glu-Leu	0.0210199	0.0632056	24	9	3984.9	0.0758132	0.9295	24.0327	6	26098.5	0.0118591	0.0476343	24.0163	7.50102	22791.6	4245.44	0.186272	20137	23140	17747	20577	28485	24896	25928	25085	21465	26731	25715	26658	21162	18070	16451	22466	22794.6
236	Glu-Met	0.00164724	0.00965163	24	12	2246.83	0.135488	0.965964	22.3291	12	10477	0.00209959	0.0133498	23.1646	12.0156	8253.8	2890.81	0.35024	6378	9068	5547	6041	10710	9551	8423	7030	8426	12539	9816	11127	6634	6653	6076	6812	8176.94
249	Gly-Gly-Gly	0.0210199	0.0632056	24	12	173.595	0.252979	1	20.464	12	909.75	0.0331644	0.106847	22.232	12.0764	710.701	235.268	0.331037	461	776	544	464	957	781	666	492	726	1021	835	1057	567	605	516	703	698.188
258	Gly-Ser	0.0419656	0.10784	24	12	284.257	0.277277	1	24.0327	5.99999	2190.25	0.0634591	0.17888	24.0163	9.00204	1987.24	260.617	0.131145	1608	2266	1584	1803	2346	2298	2062	2055	1881	2173	2068	2490	1852	1858	1690	1765	1987.44
259	Gly-Thr	0.000572095	0.00471842	24	12	2884.11	0.0303765	0.9295	23.7736	12	13328.2	0.000207848	0.00370531	23.8868	12.0003	10726.3	3664.24	0.341611	8919	10200	6698	7631	13654	12828	10718	11768	11832	14117	14240	13124	8765	7876	8937	10098	10712.8
269	Hexadecanedioic acid	0.000572095	0.00471842	18	6	1066.32	0.518806	1	20	6	6228.5	0.00270759	0.015764	19	6.01667	5007.66	1309.77	0.261554	4391	4189	3682	4120	6591	7367	4866	6090	3690	4146	4341	3314	5160	5128	4732	5776	4848.94
272	His-Ala	0.0299489	0.0829149	24	12	1070.21	0.170733	0.981551	24.1644	12	7970.75	0.0320905	0.104318	24.0822	12.0001	6915.56	1323.01	0.191309	6752	6448	4405	5700	8254	7818	6285	6967	7737	7617	7929	8600	6430	5995	5988	7781	6919.12
280	His-Pro	0.000320124	0.00340574	24	12	8532.3	0.0423327	0.9295	20.6557	12	30844	0.000165453	0.00336731	22.3279	12.0677	20442.1	12222.6	0.597912	13535	14616	10291	11782	22390	26650	14274	21227	31767	30862	37007	23740	14219	13975	10878	19951	19822.8
286	His-Trp	0.0299489	0.0829149	24	12	1499.77	0.197555	1	21.0501	12	9437.25	0.0362686	0.114047	22.5251	12.0517	7370.44	2119.51	0.287569	5922	7441	4095	5525	8449	7853	5816	6194	7682	9336	10838	9893	6178	6495	5420	9253	7274.38
291	Ile-Ala-Lys	0.00267199	0.0134688	24	0	2029.93	0.229416	1	23.9024	6.63e-05	7515.24	0.00514744	0.0249311	23.9512	3.32e-05	5511.31	2454.89	0.445427	7891	10688	4455	7027	5585	6227	3718	4104	3452	3730	3093	3572	8390	6845	4203	5264	5515.25
315	Isomaltose A	7.77e-06	0.000473861	18	6	1448.51	0.217038	1	20	5.99998	6473.5	2.41e-05	0.00137326	19	6.01666	5097.4	1385.05	0.271718	4409	4658	3757	4663	6565	7205	5415	6709	3153	4287	4162	3238	5409	4728	4741	5774	4929.56
320	L-.beta.-Homolysine	0.000987235	0.00692825	18	6	17351	0.549142	1	20	6	128378	0.00461897	0.0229096	19	6.01667	102383	28234.1	0.275769	88686	81086	75070	82999	136400	143699	93185	140227	73774	83057	88460	72860	103910	112718	93374	113884	98961.8
321	L-.beta.-Homomethionine	0.00164724	0.00965163	24	21	1574.2	0.0476976	0.9295	24.1644	17.9999	3086.74	0.000821171	0.00750141	24.0822	19.5053	1785.44	1554.46	0.870629	3203	3649	1217	2259	1013	838	538	467	584	553	1029	783	2824	3772	1912	3839	1780
323	Lauroyl-L-carnitine	0.000320124	0.00340574	18	6	38644.1	0.151085	0.966499	20	6	83164.8	0.000528965	0.00582804	19	6.01667	45926.9	40111.6	0.873378	23418	13619	15746	22577	102240	83720	68448	78251	18289	18645	18637	22171	47859	51438	37089	34912	41066.2
324	Leu-Ala-Lys	0.0065055	0.0255615	24	0	1466.36	0.347508	1	23.6461	6.63e-05	5101.99	0.0160331	0.0606244	23.8231	3.34e-05	3679.52	1925.48	0.523296	4924	8586	3139	3759	3687	4051	2174	2514	2305	2101	1946	2223	5879	4866	2663	4237	3690.88
327	Leu-Gln	0.0210199	0.0632056	24	12	12042	0.154112	0.974165	24.0327	12	61409.8	0.0218089	0.0768096	24.0163	12	51450.8	14825.8	0.288155	43545	55822	30944	35732	62844	71856	50958	49365	55596	62798	64233	63012	44100	45958	33952	52625	51458.8
331	Leu-Ile	0.000171384	0.00241724	18	3	1609.38	0.0166914	0.9295	24.4321	6.63e-05	6592.48	3.94e-05	0.00169133	21.2161	1.76803	4619.31	3955.14	0.856218	6739	4800	6408	8423	2861	2732	2407	2113	1884	1887	2868	2021	7844	9818	7610	7908	4895.19
344	Lidocaine	0.0299489	0.0829149	24	9	1417.93	0.464066	1	22.9091	6	5009.5	0.0733272	0.201263	23.4545	7.46916	3151.43	1736.37	0.55098	1389	5061	2389	1167	8856	4532	3725	2925	2448	5375	2410	3479	2967	1076	502	1476	3111.06
347	L-Propionylcarnitine	0.00980952	0.0347873	18	6	895.904	0.556084	1	20	6	4509	0.0338818	0.108493	19	6.01666	3246.57	1396.26	0.430072	2698	1528	2309	2303	3999	4921	2941	6175	2658	2075	2575	2305	3207	3720	3281	2543	3077.38
350	Lys-Glu	0.00980952	0.0347873	24	0	1607.25	0.194857	1	24.1644	6.63e-05	7302.24	0.013877	0.054118	24.0822	3.3e-05	5537.64	2021	0.364957	8581	8527	5194	6907	5015	6860	3828	4482	4883	4087	3537	2849	7736	6164	3998	5868	5532.25
358	Lys-Trp	0.00980952	0.0347873	18	9	2408.41	0.109529	0.946907	24.0327	6	13244.5	0.00841918	0.0362017	21.0163	7.87756	11652.8	2283.96	0.196001	9788	11824	7497	8273	15206	13841	12228	11703	11725	14138	13335	11953	9244	10909	9011	11008	11355.2
360	Lys-Val	0.00421867	0.0189687	24	9	1790.04	0.111973	0.946907	20	6	12524.8	0.00408973	0.0210028	22	7.425	10310.5	2017.66	0.195691	9430	11706	7529	7380	14444	12130	11908	11617	9991	10691	9607	10852	9162	8333	8300	9178	10141.1
362	Maltose	4.22e-05	0.00116331	18	6	882.116	0.299739	1	20	6	3422.25	0.000155236	0.00323159	19	6.01667	2561.73	882.819	0.344618	2222	2416	1593	1971	3671	3922	2670	3426	1825	1554	1994	1430	2517	3131	2299	2635	2454.75
363	Maltose B	7.77e-06	0.000473861	18	6	19255.4	0.136911	0.965964	20	5.99999	61705.5	1.57e-05	0.00109611	19	6.01666	42468.2	19377	0.456271	37205	37416	28743	26681	64324	67849	46850	67799	28527	21080	29890	18750	37634	45651	40750	42772	40120.1
365	Maltotriose	2.89e-06	0.00035704	18	6	2536.39	0.0955178	0.944274	20	5.99998	5551.25	4.44e-06	0.000668666	19	6.01666	3387.09	2080.85	0.614346	2558	3137	2460	1989	6288	5750	4573	5594	1004	720	903	917	4265	4295	2889	2817	3134.94
370	Met-Asn	0.00164724	0.00965163	24	12	660.084	0.089631	0.935067	23.1496	12	2762.5	0.00144997	0.0105519	23.5748	12.0039	2137.39	828.275	0.387518	1588	2427	1216	1427	2606	2798	2050	2086	2722	2904	2983	2441	1790	1854	1232	1892	2126
381	Methylacetate	0.00164724	0.00965163	18	6	13264.4	0.156094	0.97563	20	6	78878.2	0.0023825	0.0146267	19	6.01667	66352.8	13256.9	0.199795	62284	56552	54884	58826	78041	81342	73546	82584	56165	55831	68275	51274	63502	68113	61124	63598	64746.3
382	Methylpropionic acid	0.0419656	0.10784	18	9	1279.69	0.286393	1	23.7736	6.00001	7122.75	0.0651566	0.182607	20.8868	7.85742	5795.93	1573.14	0.271421	3823	7438	3900	3717	9249	6770	5863	6609	5061	8125	7025	5037	4281	3431	4119	4880	5583
393	Myristoyl-L-carnitine	0.000572095	0.00471842	18	6	32245.3	0.698773	1	20	5.99999	105538	0.00352777	0.0188584	19	6.01666	76682	33333.2	0.434694	58171	36148	36267	59491	101127	113834	89379	117813	54920	50077	55555	56801	100325	86697	61994	83684	72642.7
396	N,N'-Diacetylcystine	0.00980952	0.0347873	18	15	40.6586	0.789504	1	20	12	270.25	0.0453895	0.136674	19	13.6167	241.734	50.0069	0.206867	268	332	210	236	225	209	179	187	265	309	257	250	222	239	239	233	241.25
408	N2,N2-Dimethylguanosine	0.000171384	0.00241724	18	9	328.098	0.115406	0.94821	20	6	1207.5	0.000234	0.00388207	19	7.6	829.552	324.881	0.391634	521	404	467	521	1332	1374	985	1139	641	766	788	548	760	616	536	853	765.688
416	N-Acetylleucine	0.0144977	0.0475569	18	9	690.136	0.396541	1	27.6489	6.00002	3700	0.0354062	0.111928	22.8245	8.18265	3266.29	492.256	0.150708	2763	1912	2344	2674	3678	3789	3238	4095	3293	3566	4079	2859	2802	3534	3462	3752	3240
419	N-Acetylneuraminic acid	4.22e-05	0.00116331	18	9	630.209	0.0300515	0.9295	20	6.00001	2439.5	1.85e-05	0.00125023	19	7.6	1726.75	739.505	0.428265	920	1076	1009	1133	2768	2595	2388	2007	1470	1763	1643	1796	1340	1403	1029	962	1581.38
421	Nafadotride	0.00164724	0.00965163	18	12	247.487	0.0427191	0.9295	20	12	919.5	0.000743217	0.0070573	19	12.0333	646.147	303.339	0.469458	437	625	327	429	796	554	580	565	1023	999	783	873	432	395	425	522	610.312
426	Nicotinamide riboside cation	0.000572095	0.00471842	18	9	35763	0.0777524	0.9295	25.4179	6	233711	0.000490208	0.00557113	21.7089	7.98948	215582	28594	0.132636	188173	179797	150845	190267	257002	242167	225733	209943	212188	248559	233128	236992	203745	204504	211441	208126	212663
438	Norharmane	0.000987235	0.00692825	24	12	770.746	0.0192373	0.9295	23.2718	12	1874	0.00022546	0.00387044	23.6359	12.0029	1111.37	1027.39	0.924434	396	680	541	586	1341	1068	1846	1497	1685	2185	1561	2065	601	655	416	465	1099.25
439	Octadecanedioic acid	0.0299489	0.0829149	18	6	3088.64	0.755921	1	20	6	14397.2	0.108398	0.27642	19	6.01667	11613.6	3057.63	0.26328	11632	9120	8045	8513	15888	16842	10373	14486	8670	10072	11486	6954	13422	11172	10964	12250	11243.1
441	Oleic acid	0.000320124	0.00340574	18	6	30547	0.413383	1	20	6	95653	0.0013141	0.00991298	19	6.01667	66471.3	31329.2	0.471319	47402	59108	37747	34284	98257	112323	75273	96759	34564	45327	43796	34778	89291	65689	58169	70031	62674.9
442	Oleoyl-L-carnitine	0.0299489	0.0829149	18	6	12420.7	0.952386	1	20	6.00002	52140.2	0.12998	0.320145	19	6.01667	41867.8	12515.4	0.298926	38097	27100	22376	29569	52548	58279	41690	56044	34371	32930	38860	31336	50832	51805	34805	44977	40351.2
445	Orthanilic acid	0.0065055	0.0255615	18	3	100.232	0.390321	1	23.7736	6.63e-05	864.248	0.0177134	0.0652202	20.8868	1.7406	690.894	283.9	0.410917	712	1476	616	653	664	789	408	502	536	486	589	349	853	886	946	965	714.375
448	Palmitic acid	0.00980952	0.0347873	18	6	5653.32	0.442239	1	20	6.00001	22163.8	0.0279391	0.0935623	19	6.01667	16654	5657.98	0.339737	18437	14219	10025	11242	20037	29270	16939	22409	10573	14243	11900	10829	20207	15607	13153	16404	15968.4
455	Phe-Asn	0.00267199	0.0134688	24	12	1637.66	0.0899477	0.935067	22.6735	12	7887.25	0.0022432	0.0140565	23.3368	12.0097	6180.04	2142.12	0.346618	4999	6531	3625	4204	7568	7335	5525	6204	7040	7849	9185	7475	5311	5020	4189	6092	6134.5
456	Phe-Gln	0.0299489	0.0829149	18	9	1954.09	0.365633	1	24.1644	12	14576.2	0.0603843	0.171452	21.0822	10.5052	13098.2	2251.72	0.171911	10707	14252	7520	10774	15317	16316	13076	12859	12593	14884	15840	14988	11809	11485	8229	14537	12824.1
457	Phe-Glu-Arg	0.00980952	0.0347873	24	3	663.62	0.342841	1	22.6735	4.83e-05	3278	0.0225156	0.0786231	23.3368	1.45857	2433.91	1203.07	0.494296	3638	4276	1970	3228	2566	3053	2005	2204	1673	1517	1326	1357	4386	2409	1679	1919	2450.38
458	Phe-Glu-Lys	0.00980952	0.0347873	24	0	820.951	0.282995	1	25.8651	6.63e-05	4724.49	0.0191179	0.069505	24.9326	3.2e-05	3352.56	1230.28	0.366966	4708	6941	3286	3963	3122	3340	2399	2220	2884	2328	2283	2339	4226	3939	2435	2688	3318.81
469	Phe-Pro	0.0065055	0.0255615	24	12	1183.34	0.0470447	0.9295	20	12	5763.25	0.00278253	0.0159581	22	12.1	4020.06	1907.95	0.474608	3228	3314	2242	2712	4003	4352	2766	4036	6098	5598	6521	4836	3249	3039	2241	4285	3907.5
475	Physanguloside A	2.22e-07	0.000240315	18	6	2247.89	0.139962	0.965964	20	6	5488.75	5.68e-07	0.000589942	19	6.01667	3282.68	2197.04	0.669284	2139	2077	2611	1915	6685	6234	4155	4881	956	661	1522	701	3365	3799	2894	3668	3016.44
485	Pro-Glu b	0.00980952	0.0347873	24	12	1106.27	0.0583326	0.9295	23.6461	12	4641.25	0.00484437	0.0237287	23.8231	12.0007	3635.8	1363.57	0.375039	2978	2823	2494	2705	4374	4757	3476	3919	3901	4953	5411	4300	3080	2605	2303	3968	3627.94
489	Pro-Leu	0.0210199	0.0632056	18	6	4502.68	0.946285	1	20	6.00001	33294.8	0.0978129	0.255446	19	6.01667	29694.7	3921.04	0.132045	29428	27375	21784	27995	34275	36516	28789	33599	26249	24863	29058	21383	34508	33171	26016	32504	29219.6
515	Riboflavin	0.0299489	0.0829149	24	15	2583.41	0.184254	0.993547	25.8651	12	13816.5	0.0342112	0.109244	24.9326	13.5751	10942	3542.5	0.323754	7756	7951	7492	5969	11714	12543	8912	11669	14840	16117	13360	10949	7451	10027	12645	16659	11003.4
521	Salicylic acid	0.00164724	0.00965163	24	12	20507	0.0826125	0.9295	22.7907	12	128418	0.00134753	0.0100427	23.3953	12.008	103521	27106.9	0.261848	77439	78787	86789	82646	84210	116985	91248	127773	132729	105664	140854	134423	87866	91774	99297	109432	102995
523	Ser-Ala	0.0065055	0.0255615	24	9	2913.28	0.0411471	0.9295	24.0327	6	13874	0.00246956	0.0149707	24.0163	7.50102	11716.3	3027.14	0.258371	10065	11519	8092	8843	15512	14695	12193	13096	12058	14297	14191	13911	9797	8966	8804	11455	11718.4
537	Ser-Ser	0.0419656	0.10784	24	12	612.708	0.128075	0.963963	24.0327	6	2380.25	0.0334634	0.10757	24.0163	9.00205	1949.42	601.896	0.308756	1389	2272	1242	1370	2938	2679	1921	1983	1979	2771	2171	2560	1527	1568	1186	1642	1949.88
540	Ser-Tyr	0.0299489	0.0829149	24	12	3388.46	0.137609	0.965964	23.1496	12	22647.5	0.0267534	0.0902901	23.5748	12.0039	19271.1	4419.21	0.229318	17980	18625	13612	16433	20423	23211	17899	20630	19594	22488	25509	22999	17101	15096	15283	20482	19210.3
544	Stanozolol	0.00267199	0.0134688	18	6	1425.53	0.178257	0.990633	20	6	4161	0.00411976	0.021036	19	6.01667	2651.28	1600.69	0.603742	1849	1162	1697	1927	5166	4223	3018	4237	1041	2061	2573	1039	2632	2758	1984	1950	2457.31
547	Succinic acid	0.000987235	0.00692825	18	6	81210	0.176698	0.990633	20	6	467886	0.00168405	0.0115745	19	6.01667	393501	77646.9	0.197323	374395	341953	322276	352334	470875	488484	420453	491731	329713	319250	402147	302851	373826	403985	369982	381220	384092
551	Tetrasaccharide 02	0.00980952	0.0347873	18	6	3015.1	0.452575	1	20	6	12597.2	0.0284895	0.095038	19	6.01667	9590.67	2635.38	0.274786	8076	16243	6974	6113	17026	10645	10463	12255	6924	5021	5440	8287	8072	9108	9929	7765	9271.31
553	Thiazolidine-4-carboxylic acid	0.000572095	0.00471842	24	21	3913.13	0.0159311	0.9295	24.0327	17.9999	9217.22	0.000114889	0.00275307	24.0163	19.501	5828.48	4172.78	0.71593	8949	8753	7073	7266	2935	3233	1158	3101	4528	2723	3613	3008	7299	9510	8556	11504	5825.56
554	Thr-Ala	0.00267199	0.0134688	18	12	1326.53	0.0401282	0.9295	23.9024	12	9270	0.0010873	0.00880001	20.9512	12.2429	7773.39	2168.34	0.278943	6917	7129	5249	6362	8399	9563	7282	9423	8635	9429	9425	9591	5942	5353	5517	7405	7601.31
558	Thr-Gln	0.00267199	0.0134688	24	12	1680.44	0.0952629	0.943909	24.4321	12	9433	0.00236114	0.0145637	24.2161	12.001	8121.09	2027.76	0.24969	6696	8138	5446	5643	10739	8619	8930	8873	8371	9176	9310	10875	7171	6906	6500	8775	8135.5
561	Thr-Ile-Lys	0.00980952	0.0347873	24	0	3347.8	0.346486	1	24.7059	6.63e-05	16425	0.022719	0.0792057	24.3529	3.27e-05	12088.8	4667.62	0.386111	16183	25009	10552	13956	11672	13889	8490	9529	8575	8978	7148	8097	17021	14153	8850	10489	12036.9
571	Thr-Val-Leu	0.00980952	0.0347873	18	0	853.478	0.107377	0.946907	24.2975	17.9999	6062.24	0.00827464	0.0358472	21.1488	18.408	4865.68	1817.17	0.373466	7947	8767	4018	6329	3804	3937	2855	4071	4154	3554	3985	3793	6521	6279	4830	6619	5091.44
577	Trehalose	7.77e-06	0.000473861	18	6	42743.7	0.129116	0.963963	20	6	126129	1.49e-05	0.00108038	19	6.01667	85047.5	41368.5	0.486417	69396	76586	57069	51798	129103	139226	98491	137696	53863	39054	54564	36973	74769	94766	78901	88297	80034.5
580	Trisaccharide 01	1.91e-05	0.000802606	18	6	422.85	0.271922	1	20	5.99997	2091	6.84e-05	0.00219274	19	6.01665	1709.75	386.844	0.226257	1586	1399	1399	1578	2046	2052	1924	2342	1181	1438	1438	1062	1906	1724	1749	1782	1662.88
584	Trisaccharide 05	8.88e-07	0.000240315	18	6	6433.61	0.142971	0.966499	20	5.99999	14013.2	2.14e-06	0.000589942	19	6.01666	8413.39	5457.41	0.648658	5992	6894	5999	4834	16010	14658	10882	14503	2103	1512	1801	1721	10470	12524	7193	6937	7752.06
602	unknown1	0.00980952	0.0347873	18	9	1122.53	0.114493	0.946907	20	6.00001	6030.5	0.00875097	0.0373685	19	7.60001	4547.87	1192.56	0.262223	3248	3471	3472	3118	6208	6436	4973	6505	3244	4498	4122	3644	3822	3325	4291	4638	4313.44
606	unknown1001	0.0419656	0.10784	24	9	741.578	0.229676	1	24.0327	12	4929.25	0.0543803	0.157292	24.0163	10.499	4381.44	800.808	0.182773	4071	4617	2755	3864	5554	5376	4267	4467	4281	5060	5118	5258	3678	3692	3441	4613	4382
609	unknown1004	0.000320124	0.00340574	18	0	529.623	0.123409	0.963963	24.2975	17.9999	3178.49	0.000440062	0.00524922	21.1488	18.408	2654.98	849.881	0.320109	3963	4455	2440	3379	1955	2197	1782	2216	2237	2003	2317	2511	2985	3274	2524	3931	2760.56
612	unknown1007	0.0065055	0.0255615	24	21	1007.27	0.188381	0.994309	23.7736	17.9999	5092.74	0.00944181	0.0398082	23.8868	19.4933	4400.26	1154.4	0.262347	5899	6682	3794	4572	3378	3613	3075	3748	3903	3556	3905	3998	5102	5307	3961	6001	4405.88
613	unknown1008	0.0419656	0.10784	18	0	298.046	0.631003	1	20	17.9999	4340	0.12264	0.3066	19	18.05	4062.79	367.428	0.0904373	4908	5356	3432	4182	3410	3800	3437	3835	4072	4129	4108	4253	4266	4312	4047	4735	4142.62
617	unknown1011	0.00980952	0.0347873	18	0	518.309	0.128056	0.963963	24.2975	17.9999	2817.5	0.009647	0.0405155	21.1488	18.408	2369.52	699.598	0.295249	3112	4211	2197	2964	2059	2231	1702	1758	1834	1798	1987	2180	2823	3160	2272	3015	2456.44
618	unknown1012	0.00815751	0.0320236	18	0	702.157	0.272564	1	24.1644	17.9999	6814.24	0.0158058	0.0598244	21.0822	18.3931	6143.38	1146.85	0.186681	7940	9228	5509	6882	4973	5737	4804	5509	5627	5385	5900	5878	6708	6868	5859	7822	6289.31
619	unknown1013	0.0144977	0.0475569	24	0	1288	0.192619	0.997653	24.7059	6.63e-05	7326.74	0.0192149	0.0697404	24.3529	3.27e-05	5908.46	1644.82	0.278384	7800	9678	5233	6596	4878	5614	4198	5290	4614	4660	4674	5367	6173	7183	5560	6725	5890.19
625	unknown1019	0.000320124	0.00340574	18	0	1377.09	0.0249596	0.9295	23.9024	17.9999	4835.49	0.000101773	0.00256208	20.9512	18.3644	3463.07	1742.24	0.50309	5515	6307	4025	4499	2058	2448	1955	2273	2576	2419	2571	3133	4339	5575	4161	5267	3695.06
626	unknown102	4.22e-05	0.00116331	18	9	2561.49	0.193854	1	20	6.00001	9364.75	0.000103961	0.00260203	19	7.60001	7111.79	2228.96	0.313418	4624	3803	3844	5003	9618	10547	8910	8384	4672	7036	7633	7081	6786	5720	6446	6671	6673.62
630	unknown1023	0.00421867	0.0189687	18	0	843.932	0.252095	1	24.9858	17.9999	4226.74	0.00834445	0.0359875	21.4929	18.4883	3651	1403.84	0.384509	5730	8231	3311	4238	3139	3227	2195	2440	2681	2628	2633	3498	3896	4724	3799	4488	3803.62
634	unknown1027	0.0210199	0.0632056	18	9	999.142	0.255016	1	23.52	6	6805.25	0.0333885	0.107409	20.76	7.83796	5827.12	1199.97	0.205929	5654	5564	3420	4321	7067	8509	5165	6480	6180	5502	6235	6977	4786	4425	4422	5835	5658.88
636	unknown1029	0.0419656	0.10784	18	9	420.021	0.839725	1	20	6.00002	3556	0.153136	0.360249	19	7.60001	3197.7	397.164	0.124203	2779	2535	2653	2572	3686	4381	2804	3353	3351	2979	3369	2960	2616	3537	3255	3084	3119.62
637	unknown103	0.00267199	0.0134688	18	9	6503.97	0.333769	1	20	6	30084.8	0.00715446	0.0321024	19	7.6	22588.8	6241.97	0.27633	15194	13631	12938	17136	33312	32422	29966	24639	12100	21305	21889	21472	21339	20844	22793	20808	21361.8
638	unknown1030	0.000320124	0.00340574	18	9	1543.44	0.0981989	0.946907	20	5.99999	12669	0.000357349	0.00464887	19	7.59999	11289.4	1679.18	0.14874	9544	8949	9747	9898	12969	14339	11041	12327	11080	11463	12088	11418	8853	10393	10969	10271	10959.3
639	unknown1031	0.00980952	0.0347873	18	9	4301.86	0.695102	1	25.4179	5.99999	28572	0.0408306	0.124944	21.7089	7.98947	25515.7	3052.03	0.119614	21767	20933	20889	21847	29431	34783	22160	27914	26587	23049	28374	25745	22213	26465	27079	24030	25204.1
644	unknown1036	0.0299489	0.0829149	18	0	835.093	0.574189	1	25.4179	17.9999	7296	0.0870662	0.232858	21.7089	18.5412	6972.32	1204.27	0.172721	9450	10864	5948	7793	5903	6303	5845	6009	6447	5883	6680	7156	7697	7337	5966	8184	7091.56
645	unknown1037	0.0499351	0.128016	24	18	609.172	0.253218	1	24.5682	17.9999	3927	0.0679076	0.189337	24.2841	18.0024	3206.76	541.818	0.168961	3326	3272	2196	2936	2507	2217	2514	2847	3098	2893	3326	4390	2820	4112	4873	3903	3201.88
648	unknown104	0.000572095	0.00471842	18	6	22104.2	0.512069	1	20	6	54431	0.00267626	0.0157022	19	6.01667	39109.5	14463.3	0.369814	46225	36859	19041	26948	60208	68177	42920	46419	7529	12641	11891	9650	81274	44924	42354	40650	37356.9
649	unknown1040	0.0419656	0.10784	18	0	540.23	0.447171	1	22.4427	17.9999	6215.25	0.0933734	0.246529	20.2214	18.2198	5787.12	595.273	0.102862	7391	6751	5537	5945	4677	5328	5073	5910	5707	5195	6245	5554	5802	6620	5888	6551	5885.88
650	unknown1041	0.00164724	0.00965163	24	21	1096.19	0.0630638	0.9295	23.9024	17.9999	2450.24	0.00105671	0.00868225	23.9512	19.497	1584.38	1161.4	0.733029	2246	3281	1258	2261	811	675	541	534	860	609	938	1574	1753	2893	1899	3256	1586.81
652	unknown1043	0.00164724	0.00965163	18	3	579.474	0.0288735	0.9295	24.0327	6.63e-05	2998.74	0.000520966	0.00578406	21.0163	1.75139	2097.84	1131.89	0.539551	3163	4049	2166	2617	1690	1636	1270	1340	1338	1100	1315	1570	2722	3286	2874	2833	2185.56
653	unknown1044	0.0299489	0.0829149	18	0	869.565	0.76197	1	20	17.9999	6000	0.109083	0.277678	19	18.05	5684.82	959.855	0.168845	7023	9498	4760	7359	4300	5095	4057	5314	5146	5318	6124	6300	6539	5918	5282	6261	5893.38
655	unknown1046	4.22e-05	0.00116331	24	21	1215.87	0.0243696	0.9295	23.52	17.9999	3799.24	1.52e-05	0.00108038	23.76	19.4868	2647.98	1290.52	0.487359	3254	3007	2966	3622	1532	1290	1491	1206	1997	1721	2933	2366	2813	4409	4320	3655	2661.38
657	unknown1048	0.0419656	0.10784	24	9	526.795	0.341198	1	25.1282	6	5041.75	0.075118	0.205471	24.5641	7.53842	4573.3	580.045	0.126833	4565	4771	3675	4857	4997	5793	4578	4799	4493	4908	5529	4705	4580	3410	3451	4286	4587.31
659	unknown105	0.00267199	0.0134688	18	6	16635.4	0.492838	1	20	6	43894.8	0.0100509	0.0418065	19	6.01667	32368.5	10648.6	0.328982	37831	31438	18614	22705	47436	60211	35634	32298	5822	9977	10113	7564	63327	46764	32781	34734	31078.1
674	unknown1063	0.00164724	0.00965163	24	0	2146.42	0.0252005	0.9295	24.0327	6.63e-05	7863.48	0.000460341	0.00537271	24.0163	3.31e-05	6104.34	2629.8	0.430808	8101	9803	6131	7419	5174	4986	4011	4391	4149	3968	4685	4943	7431	7745	7402	7308	6102.94
675	unknown1064	0.00421867	0.0189687	24	0	999.495	0.0296419	0.9295	24.1644	6.63e-05	3837.49	0.00124884	0.00955388	24.0822	3.3e-05	2951.19	1242.67	0.421073	4030	4782	3130	3408	2370	2307	2016	2200	2053	1816	2155	2685	3336	3620	3438	3820	2947.88
679	unknown1068	0.000987235	0.00692825	18	0	792.313	0.0197358	0.9295	24.0327	17.9999	2182.99	0.000230805	0.00387044	21.0163	18.3786	1289.88	1156.72	0.896771	2753	2894	1592	2328	485	472	533	509	703	471	715	861	1604	2733	2382	2013	1440.5
684	unknown1072	0.000572095	0.00471842	24	0	1049.52	0.0528223	0.9295	24.4321	6.63e-05	6312.99	0.000344713	0.00457855	24.2161	3.29e-05	5200.17	1363.88	0.262276	6729	7549	4976	5998	4516	4577	4253	4501	4201	4085	4319	4594	5959	5723	5213	5859	5190.75
686	unknown1074	0.0177588	0.0582101	24	9	1567.66	0.0842729	0.9295	24.0327	6	8034	0.0112312	0.0456203	24.0163	7.50102	6914.61	1628.05	0.235451	6352	7026	4606	5775	8918	8569	6860	7789	7808	8176	8569	7460	5760	4830	4890	7264	6915.75
692	unknown108	0.000171384	0.00241724	18	6	7889.19	0.548738	1	20	6.00001	19022	0.000966005	0.00823766	19	6.01667	11699.3	7726.03	0.660384	9404	7057	4717	4817	19154	26167	16248	14519	2120	5342	5280	2200	21214	11628	9912	12430	10763.1
697	unknown1084	0.00980952	0.0347873	24	9	1917.67	0.0769247	0.9295	24.0327	6.00002	11108.2	0.00617963	0.02899	24.0163	7.50103	9723.09	2019.03	0.207653	9201	9916	6711	8436	11735	11744	9767	11187	10431	11726	11551	10621	8370	7040	7227	9929	9724.5
703	unknown109	8.88e-07	0.000240315	18	6	9110.01	0.324879	1	20	5.99998	20829	4.63e-06	0.000668666	19	6.01666	12701.4	8347.32	0.657197	10641	9490	5119	5449	23703	25295	19201	15117	2422	4874	4638	2185	18839	13664	11947	14454	11689.9
708	unknown1094	0.00980952	0.0347873	24	12	1599.12	0.0482746	0.9295	24.0327	6.00001	10079.8	0.0040987	0.0210028	24.0163	9.00205	8819.7	1641.61	0.18613	7788	8417	6379	8110	11085	9842	9864	9528	8941	10016	10180	10393	8043	7288	6520	8741	8820.94
712	unknown1098	0.0210199	0.0632056	18	12	329.512	0.227527	1	23.9024	12	5750.25	0.0303349	0.0998101	20.9512	12.2429	5183.98	836.104	0.161286	4976	5433	3307	4540	5781	6006	4985	5686	5220	5377	6033	6371	4808	4023	4178	5158	5117.62
713	unknown1099	0.00164724	0.00965163	18	0	1208.62	0.0134623	0.9295	24.0327	17.9999	4783.49	0.000259822	0.00406148	21.0163	18.3786	3830.03	1236.15	0.322751	5273	5054	4587	5126	3092	3027	2680	3165	3220	3000	3438	3060	4698	5474	4372	4590	3991
718	unknown1102	0.0065055	0.0255615	24	21	973.686	0.118219	0.955018	24.0327	17.9999	4530.49	0.00628359	0.0292609	24.0163	19.501	3991.73	1047.57	0.262435	4787	6277	3941	4282	3085	2881	3389	3356	3344	3117	3377	3898	4673	4843	3743	4863	3991
722	unknown1106	0.00267199	0.0134688	18	3	996.667	0.103083	0.946907	23.9024	6.63e-05	10953.2	0.00253323	0.0152558	20.9512	1.74596	9125.07	2683.97	0.294132	11628	14343	8422	9420	8826	7641	6962	8277	7194	6376	7547	7999	11353	12549	9775	11129	9340.06
730	unknown1113	0.0419656	0.10784	18	9	966.261	0.63207	1	20	5.99998	6304	0.122803	0.30674	19	7.59999	5441.01	1048.61	0.192723	4261	5742	3076	3752	8277	6193	5554	5192	5013	4907	5994	6276	5174	4688	3835	5824	5234.88
731	unknown1114	0.000171384	0.00241724	24	0	5676.3	0.0225517	0.9295	22.6735	6.63e-05	12071.7	5.2e-05	0.00187766	23.3368	3.41e-05	7572.24	7071.15	0.933825	14144	11579	9658	12906	6219	6432	5124	5590	2389	900	1094	2499	10754	13809	13635	7051	7736.44
739	unknown1121	0.00267199	0.0134688	24	0	1400.6	0.210978	1	24.2975	6.63e-05	8077.99	0.00478098	0.0235246	24.1488	3.3e-05	6571.75	1944.98	0.295961	8658	10875	5825	6954	6606	5125	5785	5256	5022	4472	4920	6379	8056	7762	6583	6721	6562.44
747	unknown1129	0.00421867	0.0189687	18	0	1102.03	0.0328242	0.9295	24.1644	6.63e-05	7907.48	0.00136879	0.0101374	21.0822	2.89e-05	6053.55	1841.49	0.3042	8594	9139	6109	7788	5480	4790	4726	4701	5029	4311	5134	5115	8027	7000	6435	8046	6276.5
749	unknown1130	7.77e-06	0.000473861	18	9	1933.23	0.104595	0.946907	20	6.00001	8937.5	1.22e-05	0.00102703	19	7.6	6660.12	2199.15	0.330196	4310	4519	3847	4431	10178	10055	6682	8835	5244	6101	6806	6457	6059	5237	4986	5898	6227.81
750	unknown1131	0.00421867	0.0189687	24	0	1768.47	0.0915678	0.935114	24.0327	6.63e-05	7070.24	0.00342215	0.0185224	24.0163	3.31e-05	5507.67	2302.84	0.418116	7719	9760	4879	5923	5195	3932	4065	4479	3956	3426	3765	4590	7054	6912	6011	6437	5506.44
752	unknown1133	0.0210199	0.0632056	24	0	714.531	0.37248	1	24.7059	6.63e-05	4300.99	0.0458014	0.137818	24.3529	3.27e-05	3376.09	1076.82	0.318956	4685	6362	2783	3374	2986	2480	3145	2801	2579	2227	2406	3300	4099	3819	3250	3530	3364.12
755	unknown1136	0.000987235	0.00692825	18	0	598.566	0.0568393	0.9295	24.0327	17.9999	4101.99	0.000605363	0.00627086	21.0163	18.3786	3318.32	1051.55	0.316892	4828	5448	3153	3914	2678	2495	2513	2579	2684	2560	2700	3324	4047	4267	3816	4278	3455.25
759	unknown114	0.0419656	0.10784	18	3	386.08	0.642696	1	24.5682	6.63e-05	9189.45	0.124417	0.310148	21.2841	1.77371	5455.61	8160.56	1.49581	7999	27689	958	112	1113	643	1761	34	608	43	916	635	2897	23907	3654	23093	6003.88
763	unknown1143	0.0210199	0.0632056	24	0	1587.45	0.229457	1	24.0327	6.63e-05	8447.24	0.0305514	0.100446	24.0163	3.31e-05	7123.37	1981.71	0.278199	9364	11121	5826	7478	6838	6536	5369	5635	5592	5042	5691	6972	8450	8490	7006	8547	7122.31
764	unknown1144	0.0065055	0.0255615	24	0	1135.26	0.0458937	0.9295	24.1644	17.9999	4237.74	0.00272184	0.015764	24.0822	21.0105	3606.65	1158.87	0.321313	4944	5718	3374	4367	2979	2878	2509	2656	2871	2505	2674	3210	4309	4385	3786	4471	3602.25
765	unknown1145	0.0210199	0.0632056	18	12	378.302	0.523835	1	20	12	5237.75	0.0606578	0.17202	19	12.0333	4742.1	597.08	0.12591	4605	5356	3538	4157	5430	4640	4854	4326	4700	5101	5401	5749	4294	4063	3989	4542	4671.56
766	unknown1146	0.00267199	0.0134688	24	0	1953.91	0.116713	0.951726	24.4321	6.63e-05	7785.23	0.00282946	0.016163	24.2161	3.29e-05	5716.27	2591.04	0.453274	8808	10841	5038	6454	4842	4111	4507	3961	4015	3222	3571	5147	7108	7642	6311	5596	5698.38
770	unknown115	0.0419656	0.10784	24	21	1817.79	0.783294	1	25.8651	6.63e-05	3064.48	0.145132	0.346845	24.9326	23.3743	2921.23	4391.92	1.50345	6666	5401	181	10	7	32	252	15	68	9	55	168	22649	4496	1468	2601	2754.88
772	unknown1151	0.00267199	0.0134688	24	0	1125.71	0.0424406	0.9295	24.0327	6.63e-05	3270.24	0.0011436	0.00905264	24.0163	3.31e-05	2399.02	1323.93	0.551861	3722	4096	2144	3119	1894	1701	1632	1469	1690	1215	1327	1986	3400	3592	2683	2703	2398.31
773	unknown1152	0.0065055	0.0255615	24	0	1210.04	0.0447058	0.9295	24.1644	6.63e-05	3774.49	0.00265902	0.0156647	24.0822	3.3e-05	2662.05	1564.92	0.587862	4115	5292	2556	3135	1916	1754	1643	1807	1795	1407	1374	2097	3187	3652	3277	3519	2657.88
775	unknown1154	0.0065055	0.0255615	18	3	792.667	0.26233	1	20	4.94e-05	6967.75	0.0125831	0.0499402	19	1.58336	6336.27	1095.54	0.172899	7240	7792	5489	7350	6820	6747	5297	6250	4998	5180	5849	5703	7559	7686	6441	7952	6522.06
776	unknown1155	0.0065055	0.0255615	18	0	838.982	0.0788953	0.9295	24.0327	17.9999	4333.24	0.00440101	0.0220409	21.0163	18.3786	3218.67	1380.09	0.428776	5153	6248	2925	3673	2728	2178	2092	2254	2635	1928	2256	2971	4596	4511	3582	4644	3398.38
778	unknown1157	0.0419656	0.10784	24	0	1441.79	0.732246	1	25.5652	6.63e-05	6021.48	0.137745	0.334057	24.7826	3.21e-05	3382.33	2547.15	0.753075	4028	14119	3546	2393	3796	1066	3594	1696	1129	749	632	2922	4295	3924	3952	1321	3322.62
782	unknown1160	0.00980952	0.0347873	24	0	1440.02	0.181794	0.993547	24.1644	6.63e-05	6524.74	0.0130704	0.0515905	24.0822	3.3e-05	5056.76	1949.08	0.385441	6602	9473	4713	5311	4946	3606	4254	3568	3830	2837	3302	4952	6209	6288	5796	5138	5051.56
788	unknown1166	0.0419656	0.10784	24	0	880.171	0.208447	1	23.9024	6.63e-05	4968.24	0.0502023	0.148076	23.9512	3.32e-05	4214.62	1211.04	0.287343	5329	6478	3419	4647	4200	3530	3244	3690	3586	2681	3466	3791	4429	5639	4847	4489	4216.56
789	unknown1167	0.00980952	0.0347873	24	0	1179.81	0.085657	0.9295	24.0327	6.63e-05	3894.49	0.00679077	0.0309191	24.0163	3.31e-05	2967.22	1354.82	0.456596	4160	5316	2440	3662	2559	1886	2226	1935	2065	1717	1933	2845	3957	4038	3265	3460	2966.5
790	unknown1168	0.0299489	0.0829149	24	0	1592.23	0.18916	0.994309	24.1644	17.9999	4996.99	0.0349734	0.111294	24.0822	21.0105	4036.87	1691.83	0.419095	6232	8354	3161	4051	3368	2333	2836	2709	2910	2041	2632	3872	5220	5438	4340	4990	4030.44
791	unknown1169	8.77e-05	0.00171035	18	9	5064.3	0.148497	0.966499	20	6.00001	19167.2	0.000159501	0.00328877	19	7.6	13872.8	5120.57	0.369107	8864	6737	7913	9333	20619	21843	13543	20664	11857	13416	16092	9351	10776	10141	11636	13075	12866.2
793	unknown1170	0.000572095	0.00471842	24	0	1798.53	0.16483	0.980144	24.4321	6.63e-05	7410.98	0.000968353	0.00823766	24.2161	3.29e-05	5218.35	2656.89	0.509144	7680	11517	5004	5443	4760	3378	4138	3966	3834	2492	2881	4004	7451	5958	5442	5252	5200
795	unknown1172	0.0419656	0.10784	24	21	487.55	0.270531	1	24.9858	17.9999	5114.75	0.0621948	0.176015	24.4929	19.5381	4475.6	567.273	0.126748	4494	5192	4051	4429	4515	3651	3394	4228	3946	3751	4491	4822	5055	4745	4792	5867	4463.94
798	unknown1175	0.00267199	0.0134688	18	3	359.917	0.105517	0.946907	23.9024	6.63e-05	3571.49	0.00258647	0.0154306	20.9512	1.74596	2957.37	957.35	0.323716	3924	4659	2765	2938	2778	2580	2047	2795	2191	1885	2455	2667	3228	3942	3714	3977	3034.06
801	unknown1178	0.0144977	0.0475569	24	12	1411.39	0.21256	1	24.5682	12	8367.5	0.0209005	0.0746694	24.2841	12.0016	7085.66	1733.17	0.244603	5580	7069	4269	5464	9608	8721	6470	6537	7240	7978	9397	8855	6002	6705	5899	7836	7101.88
805	unknown1181	0.00980952	0.0347873	24	12	3667.41	0.0806366	0.9295	23.9024	12	18069.5	0.00644054	0.0297944	23.9512	12	14995.6	4537.95	0.302619	12508	15238	9788	10749	19552	16384	17005	15641	14883	18235	17526	21634	12248	11820	11510	15093	14988.4
809	unknown1185	0.00164724	0.00965163	24	0	2823.3	0.0569104	0.9295	24.0327	6.63e-05	10078	0.000963225	0.00823766	24.0163	3.31e-05	7809.24	3485.83	0.446372	10901	13120	6820	9471	6490	6125	5043	6595	4852	4618	5750	6765	9299	9993	8593	10483	7807.38
816	unknown1191	0.0065055	0.0255615	24	21	1710.67	0.0187293	0.9295	24.1644	17.9999	4380.49	0.00121999	0.00942081	24.0822	19.5053	2958.52	1773.03	0.599298	3897	4537	3001	4170	1570	1747	1619	1685	1552	1363	1969	2605	3871	5109	4840	3702	2952.31
817	unknown1192	0.0144977	0.0475569	24	0	3614.91	0.198709	1	23.9024	6.63e-05	16425.2	0.0197328	0.0712024	23.9512	3.32e-05	13193.9	4945.24	0.374813	18064	23715	11162	12760	13005	10858	9712	10539	9714	7485	9877	11824	15890	16920	14775	14929	13201.8
823	unknown1198	0.00164724	0.00965163	18	0	1008.69	0.0178724	0.9295	24.0327	17.9999	4401.49	0.000336594	0.00451223	21.0163	18.3786	3222.83	1386.96	0.430353	5096	5010	3476	4281	2300	2481	2042	2543	2330	2057	2639	2594	4322	4206	4073	5005	3403.44
827	unknown1200	0.00344533	0.0173066	24	0	900.5	0.1363	0.965964	24.2975	6.63e-05	4071.24	0.00406843	0.020922	24.1488	3.3e-05	3130.19	1226.67	0.391883	4535	5673	2700	3377	2700	2599	2334	2455	2301	1793	2282	2807	3872	3663	3169	3729	3124.31
830	unknown1203	0.00164724	0.00965163	24	0	1503.84	0.103702	0.946907	24.2975	6.63e-05	5880.74	0.00165269	0.0114133	24.1488	3.3e-05	4350.67	1992.02	0.457866	6347	8496	3887	4793	3623	3035	3023	3257	2874	2549	3014	3835	5475	5362	4745	5143	4341.12
832	unknown1205	0.00267199	0.0134688	24	21	1582.15	0.0278455	0.9295	24.1644	17.9999	5036.49	0.00078168	0.00729456	24.0822	19.5053	4123.66	1885.09	0.45714	6149	7088	4642	4780	2611	2749	2614	2904	3042	2437	3104	3607	4850	5097	4943	5256	4117.06
837	unknown121	0.000320124	0.00340574	18	6	20666.6	0.380814	1	20	6.00001	65369	0.00122057	0.00942081	19	6.01667	45104.4	21053.1	0.466764	37651	43584	21506	26332	62583	80406	48049	70438	23768	31120	26673	20897	61507	44330	35199	46808	42553.2
841	unknown1213	0.00980952	0.0347873	24	21	1313.8	0.0790668	0.9295	24.0327	17.9999	6392.49	0.00633041	0.0294106	24.0163	19.501	5441.66	1486.58	0.273185	7268	8008	5049	5569	4448	4495	3713	4834	4471	3797	4687	5141	5967	6694	6156	6753	5440.62
845	unknown1217	0.00164724	0.00965163	18	0	2037.88	0.0509646	0.9295	24.0327	17.9999	10973.7	0.000871854	0.00778377	21.0163	18.3786	8548.49	3318.11	0.388151	13358	15074	8133	10754	6852	6534	5416	6284	6781	5404	7176	8028	10647	11184	10330	11734	8980.56
846	unknown1218	0.00267199	0.0134688	24	21	4654.53	0.0419879	0.9295	23.9024	17.9999	16414.5	0.00113261	0.00900718	23.9512	19.497	13231.3	5116.01	0.38666	19097	20939	12600	14638	9698	9328	8476	9233	10767	8075	11740	11623	15492	17011	15590	17565	13242
849	unknown1220	0.00980952	0.0347873	24	0	1969.47	0.0306244	0.9295	24.0327	6.63e-05	3862.73	0.00273685	0.0157797	24.0163	3.31e-05	2272.73	2528.18	1.1124	4215	5639	2897	2700	842	690	785	744	803	454	698	1008	3276	5230	3795	2566	2271.38
853	unknown1224	0.0210199	0.0632056	24	21	1038.21	0.08147	0.9295	24.0327	17.9999	4006.99	0.0126207	0.0500437	24.0163	19.501	3309.84	1113.81	0.336513	4565	5410	2839	3596	2628	2671	2311	2509	2413	2071	2933	2971	3890	4049	3809	4280	3309.06
858	unknown1229	0.00421867	0.0189687	24	21	1727.29	0.0830584	0.9295	23.9024	17.9999	6554.74	0.0031383	0.017461	23.9512	19.497	5383.99	1915.67	0.355808	7356	8904	4874	5911	4449	3970	3457	3818	4315	3442	4639	4854	6192	6576	5725	7726	5388
859	unknown123	0.0299489	0.0829149	18	6	2430.15	0.920555	1	20	6	13502.5	0.126573	0.314436	19	6.01666	11467.4	2089.66	0.182227	12411	10721	6749	10772	12897	15756	11018	14339	7673	10783	9510	7538	15675	12346	8602	12636	11214.1
866	unknown1236	0.0210199	0.0632056	24	12	2506.34	0.119705	0.960278	20	12	13325.8	0.0175755	0.0648782	22	12.1	9881.5	3710.01	0.37545	8515	8295	7063	6303	9540	11055	6968	9863	12888	14140	15570	10705	8397	6633	6523	12144	9662.62
870	unknown124	0.0299489	0.0829149	18	6	14199.8	0.992755	1	20	6	54580.2	0.134256	0.327693	19	6.01667	44696.6	11393.8	0.254915	47042	31698	23982	33658	55285	63422	45346	54268	27753	44091	32396	26581	66296	56235	34740	50262	43315.9
874	unknown1243	0.00164724	0.00965163	18	0	929.845	0.0411445	0.9295	23.9024	17.9999	4681.99	0.000718367	0.00690492	20.9512	18.3644	3600.3	1397.89	0.38827	5423	6260	3568	4423	2579	2408	2523	2757	3138	2377	3106	3293	4647	4731	4316	5034	3786.44
875	unknown1244	0.00980952	0.0347873	24	21	2189.03	0.168237	0.980144	24.1644	17.9999	7535.48	0.0122236	0.04889	24.0822	19.5053	6125.58	2575.89	0.420514	8668	12365	5275	6225	5357	3927	4168	4092	4549	3003	4340	5754	7708	8673	6833	6928	6116.56
876	unknown1245	0.0144977	0.0475569	24	21	1080.81	0.133025	0.964981	23.9024	17.9999	3944.99	0.0139839	0.0544518	23.9512	19.497	3107.19	1132.77	0.364564	3904	5102	2691	3400	2750	2036	1808	2159	3396	1814	2264	2649	3354	3633	3855	4938	3109.56
880	unknown1249	0.0299489	0.0829149	24	21	2748.35	0.184133	0.993547	24.0327	17.9999	16639.2	0.0341924	0.109244	24.0163	19.501	14388.4	2940.54	0.204369	17609	20064	11961	14617	12841	12418	11333	12059	12603	10516	13742	13861	15444	16942	15513	18658	14386.3
886	unknown1254	0.000987235	0.00692825	24	21	2496.62	0.062208	0.9295	23.52	17.9999	9524.73	0.000656998	0.00650822	23.76	19.4868	7353.41	2807.98	0.381861	10080	11444	6983	7282	5084	4617	4767	4860	6494	4680	6663	7068	7297	10911	10083	9808	7382.56
887	unknown1255	0.00267199	0.0134688	24	21	1202.08	0.0636543	0.9295	24.0327	17.9999	4688.74	0.00164628	0.0113982	24.0163	19.501	3923.65	1375.02	0.350445	5576	6385	3582	4351	2951	2952	2564	3146	3212	2552	3276	3461	4661	4642	4397	5055	3922.69
891	unknown1259	0.00421867	0.0189687	24	21	898.556	0.0462802	0.9295	23.9024	17.9999	3446.99	0.00186285	0.0122029	23.9512	19.497	2821.68	990.245	0.350942	3871	4500	2586	3121	2111	2233	1944	2042	2192	1915	2417	2460	3302	3646	3363	3477	2823.75
892	unknown126	0.00980952	0.0347873	18	6	3065.31	0.910391	1	20	5.99999	11184.2	0.0510671	0.149608	19	6.01666	8447.28	3228.38	0.38218	6435	4742	5711	4797	11473	13347	7789	12128	5272	6740	8259	4390	9734	10328	9209	8543	8056.06
898	unknown1265	0.0210199	0.0632056	18	0	1035.91	0.298958	1	23.1496	17.9999	9822.24	0.0381426	0.118478	20.5748	18.2864	8679.19	1313.98	0.151394	10968	11621	7625	9071	7849	7602	7363	7374	8872	6652	8662	9075	9514	9928	8880	10967	8876.44
899	unknown1266	0.00164724	0.00965163	24	12	1325.83	0.0674705	0.9295	23.3952	12	7322.25	0.00112304	0.00895536	23.6976	12.002	6024.23	1692.21	0.280901	5253	6289	3843	4307	6988	6490	6425	6256	6377	7026	7605	8281	4981	4937	5044	6020	6007.62
901	unknown1268	0.00164724	0.00965163	18	3	368.226	0.0421124	0.9295	24.0327	6.63e-05	2829.74	0.000733655	0.00699719	21.0163	1.75139	2105.21	893.207	0.424284	2888	3832	2156	2443	1770	1499	1600	1504	1424	1293	1378	1933	2773	2970	2439	2889	2174.44
907	unknown1273	0.0144977	0.0475569	24	0	810.344	0.0963841	0.945467	24.0327	6.63e-05	3222.24	0.0105824	0.0435568	24.0163	3.31e-05	2533.17	1027.19	0.405496	3445	4447	2177	2820	2131	1904	1912	1894	1941	1399	1743	2445	3024	2988	3094	3158	2532.62
908	unknown1274	0.000987235	0.00692825	24	0	1364.01	0.0458135	0.9295	24.4321	6.63e-05	5611.24	0.000497687	0.00562659	24.2161	3.29e-05	4228.67	1707.28	0.40374	5958	6850	4191	5446	3190	2939	3615	3575	3204	2540	2626	3985	5355	4423	4662	4911	4216.88
910	unknown1276	0.00164724	0.00965163	24	0	667.509	0.127862	0.963963	24.5682	6.63e-05	4692.24	0.00199361	0.0128457	24.2841	3.28e-05	3918.13	915.672	0.233701	4710	5647	3901	4511	3889	3209	3560	3563	3339	2747	3173	3687	4257	3651	3765	4949	3909.88
914	unknown128	0.00267199	0.0134688	18	9	13313.1	0.0697601	0.9295	20	5.99999	37736.2	0.00178712	0.0119184	19	7.59999	18437.2	15094.4	0.81869	6087	3900	3622	6799	33993	37098	25453	54401	6717	16832	6453	8102	7160	4585	11600	14718	15470
932	unknown1296	0.00421867	0.0189687	18	3	237.234	0.234187	1	25.7143	6.63e-05	2045.5	0.00782449	0.0344309	21.8571	1.82146	1951.96	673.381	0.344977	2220	2021	1507	2434	2143	1867	1589	1350	1248	1251	1810	1877	2792	2833	2199	2599	1983.75
937	unknown130	0.00421867	0.0189687	18	6	3901.82	0.807574	1	20	6	15519.5	0.0227647	0.0793009	19	6.01667	13271.9	2214.09	0.166825	15442	11166	8616	11477	17253	18555	12848	13422	6455	8450	8713	5902	23040	18141	11498	17079	13003.6
939	unknown1301	0.0065055	0.0255615	24	0	1023.54	0.109672	0.946907	24.0327	6.63e-05	3916.74	0.00588283	0.0278999	24.0163	3.31e-05	3049.77	1317.67	0.432058	3952	5744	2703	3268	2525	2316	2303	2209	2222	1661	2088	2843	3721	3840	3652	3738	3049.06
940	unknown1302	0.00267199	0.0134688	18	3	462.448	0.0471363	0.9295	23.9024	6.63e-05	3641.99	0.00125692	0.00957516	20.9512	1.74596	2955.19	989.33	0.334777	3906	4468	2885	3309	2545	2594	2578	2331	2407	1652	2256	2775	3550	4020	3544	3731	3034.44
946	unknown1308	0.0419656	0.10784	24	0	2377.47	0.456815	1	24.1644	6.63e-05	12168.5	0.094978	0.249699	24.0822	3.3e-05	9855.93	3066.79	0.311162	12249	18606	8226	9593	8673	7607	8563	7445	8027	5878	6707	11071	12236	11142	9932	11609	9847.75
949	unknown1310	0.000171384	0.00241724	18	0	1016.82	0.0631452	0.9295	24.1644	17.9999	6729.99	0.000134561	0.00300054	21.0822	18.3931	5627.72	1689.94	0.300288	8133	9125	5611	6675	4032	4516	4440	4625	4675	4567	4799	5366	7040	6166	6196	7518	5842.75
956	unknown1317	0.0210199	0.0632056	24	21	1259.71	0.244019	1	22.7907	17.9999	7895.74	0.0321747	0.104513	23.3953	19.4742	6994.82	1289.2	0.184307	8592	9687	6262	6978	5804	6054	5635	5564	6870	5335	6225	7877	7570	7792	7473	8748	7029.12
959	unknown132	0.00267199	0.0134688	18	6	1126.42	0.823874	1	20	6.00002	6824.75	0.0156709	0.0594178	19	6.01667	5898.61	981.89	0.166461	5403	4867	4542	6004	6988	7771	5868	6672	4132	5576	5181	4170	7433	6115	5725	6027	5779.62
962	unknown1322	0.00267199	0.0134688	24	0	1479.27	0.0906994	0.935067	23.52	6.63e-05	6006.99	0.00225993	0.0141205	23.76	3.35e-05	4604.25	1885.89	0.409598	6021	7847	4229	5931	4504	4931	3060	3863	2759	2948	3264	3303	6428	5086	4318	5419	4619.44
966	unknown1326	0.0419656	0.10784	24	0	2360.68	0.461615	1	23.9024	6.63e-05	12006.5	0.0957736	0.251267	23.9512	3.32e-05	10415.9	2741.07	0.263162	12486	17130	9123	9287	10081	8941	8859	8022	8457	6047	8230	11903	12226	12144	11849	11940	10420.3
976	unknown1335	0.00164724	0.00965163	18	6	3016.34	0.612594	1	20	5.99997	13422.2	0.0079705	0.0348609	19	6.01665	10559.7	2939.63	0.278383	8523	10907	6788	8830	13539	12883	10402	16865	8220	4258	8843	7285	11528	12986	10398	11000	10203.4
980	unknown1339	0.00267199	0.0134688	24	12	1718.45	0.212263	1	24.2975	12	13555.5	0.00480665	0.0235973	24.1488	12.0005	11682.3	2182.91	0.186856	10230	10531	8183	9950	12946	13472	11221	11101	11417	12310	15413	15082	9986	10789	10679	13777	11692.9
981	unknown134	7.77e-06	0.000473861	18	6	4446.46	0.278116	1	20	6.00001	11330	3.04e-05	0.00151056	19	6.01667	7406.58	3979.23	0.537257	4819	6284	4497	4968	10842	13821	9161	11496	2441	1923	4371	2831	9824	7645	6084	9783	6924.38
990	unknown1348	0.00980952	0.0347873	24	21	1177.33	0.0876209	0.931721	23.9024	17.9999	5186.74	0.00692699	0.0313648	23.9512	19.497	4296.12	1169.37	0.272191	5457	6150	3813	4454	3724	3180	3319	3275	3619	2854	3510	4675	4834	5197	5186	5530	4298.56
991	unknown1349	0.00980952	0.0347873	24	21	1247.34	0.0804168	0.9295	24.0327	17.9999	6861.24	0.00642514	0.0297712	24.0163	19.501	5835.18	1247.86	0.213851	7634	7147	5204	5907	5136	5097	4428	4780	5484	4270	4914	5903	6987	6786	6457	7215	5834.31
997	unknown1354	0.0299489	0.0829149	24	0	3193.12	0.203114	1	24.0327	17.9999	13464	0.0371202	0.116135	24.0163	21.002	11581.8	3255.15	0.281058	16067	19146	10074	11894	9388	7814	9921	8966	9761	7147	8610	12625	14289	14240	13639	11688	11579.3
998	unknown1355	0.0210199	0.0632056	24	12	1245.75	0.183924	0.993547	22.6735	12	9272.5	0.0253441	0.0864879	23.3368	12.0097	7889.47	1744.92	0.221171	7504	7956	4942	6851	8510	8976	7727	7941	7885	9572	9720	9913	7320	6285	6113	8423	7852.38
1003	unknown136	1.91e-05	0.000802606	18	6	2286.61	0.238034	1	20	5.99998	7928.25	6.04e-05	0.00208755	19	6.01666	5637.01	2300.89	0.408176	4196	4524	3660	5371	8780	9304	5743	7886	2717	3630	3993	2731	5999	5378	4836	6983	5358.19
1004	unknown1360	0.0299489	0.0829149	24	21	1529.83	0.156616	0.97563	24.2975	17.9999	12032.2	0.0298419	0.0987885	24.1488	19.5099	10583.7	1619.98	0.153063	11975	12535	9902	10725	10009	9640	8857	8945	8203	8861	10012	11383	10655	12173	13399	11902	10573.5
1005	unknown1361	0.00421867	0.0189687	24	21	929.845	0.0448516	0.9295	24.0327	17.9999	4793.24	0.00181128	0.0119738	24.0163	19.501	4116.16	1029.37	0.25008	5040	5754	3961	4509	3253	3545	3150	3590	3297	3210	3658	3707	4729	4433	4607	5404	4115.44
1016	unknown1371	0.0210199	0.0632056	18	0	680.59	0.11652	0.951726	23.7736	17.9999	6618.99	0.0171739	0.0637763	20.8868	18.3505	5838.68	874.634	0.1498	7147	7396	5374	6380	5263	5418	4862	5189	5222	4697	5561	6338	6652	6718	6334	6772	5957.69
1017	unknown1372	0.00267199	0.0134688	24	21	2417.07	0.0238081	0.9295	23.7736	17.9999	9979.98	0.000678306	0.00661472	23.8868	19.4933	8440.56	2581.05	0.305791	11089	11361	9194	9652	6407	6179	6419	6367	7565	5472	7210	8415	9900	10412	9831	9777	8453.12
1028	unknown1382	0.0065055	0.0255615	18	6	4202.16	0.707	1	20	6	21231.5	0.0293525	0.0974665	19	6.01667	17250.5	4297.05	0.249098	12763	12772	13863	17434	19399	20405	18600	26522	13234	9839	18275	13429	17191	17661	17171	19118	16729.8
1032	unknown1386	0.00421867	0.0189687	24	0	906.688	0.151304	0.966499	24.1644	6.63e-05	5191.74	0.00533408	0.0255493	24.0822	3.3e-05	4145.44	1359.4	0.327926	5485	6952	4021	4309	4013	3235	3604	3590	3609	2352	2778	3818	5153	4458	4870	4022	4141.81
1033	unknown1387	0.00980952	0.0347873	18	12	1200.31	0.157454	0.97563	20.9501	12	6790	0.0115425	0.0465353	19.4751	12.0692	5521.32	1415.43	0.256357	4557	4496	3517	5029	5854	6700	4570	5085	5689	6882	7902	6687	4306	4130	4164	6259	5364.19
1038	unknown1391	0.0144977	0.0475569	24	0	606.698	0.199637	1	23.3952	6.63e-05	3810.75	0.0198114	0.0714266	23.6976	3.36e-05	3294.71	762.442	0.231414	4114	4497	3172	3460	3352	2666	3263	2984	2713	2262	2460	3331	4285	3723	3404	3154	3302.5
1045	unknown1398	0.00421867	0.0189687	24	0	1268.2	0.112165	0.946907	24.2975	6.63e-05	4766.24	0.0040959	0.0210028	24.1488	3.3e-05	3430.38	1684.05	0.490922	5465	6605	3214	3781	2819	2285	2406	2553	2609	1691	1917	3077	4881	4343	4005	3106	3422.31
1049	unknown1400	0.00267199	0.0134688	24	0	2825.42	0.0803133	0.9295	23.7736	6.63e-05	10598.2	0.00202724	0.0129978	23.8868	3.33e-05	8321.39	3597.81	0.432357	12147	13857	7572	8817	7966	6303	6781	5902	5721	4537	5591	7380	11294	10859	9646	8985	8334.88
1051	unknown1402	0.000987235	0.00692825	24	21	1441.08	0.00912763	0.9295	23.9024	17.9999	3756.74	0.000113694	0.00275025	23.9512	19.497	2696.59	1512.46	0.560878	3797	4007	3457	3413	1623	1591	1381	1702	2109	1315	1809	1965	3595	3921	3668	3843	2699.75
1053	unknown1404	0.000987235	0.00692825	24	12	966.085	0.0278969	0.9295	23.3952	12	4484.75	0.000316715	0.00444112	23.6976	12.002	3547.46	1263.59	0.356195	3080	3158	2677	2348	4529	3712	3764	3858	4199	4392	4234	5114	2723	2629	2811	3333	3535.06
1062	unknown1412	0.00421867	0.0189687	18	3	792.313	0.0277735	0.9295	24.0327	6.63e-05	3063.74	0.00117775	0.00917208	21.0163	1.75139	1933.31	1536.3	0.794647	3093	4063	2037	3062	1386	1085	888	736	755	833	870	1300	4219	3325	2400	2786	2052.38
1065	unknown1415	0.000171384	0.00241724	24	0	1459.11	0.0141885	0.9295	24.1644	6.63e-05	3721.24	3.39e-05	0.00159391	24.0822	3.3e-05	2485.15	1745.86	0.702516	3897	4285	2841	3862	1906	1587	1334	1499	1400	1082	1328	1516	3787	3463	2904	2997	2480.5
1067	unknown1417	0.0419656	0.10784	24	3	318.905	0.150104	0.966499	20	6.63e-05	3696.75	0.0382193	0.118546	22	1.37504	3346.76	574.888	0.171775	3932	4181	3084	3590	3738	3770	3074	3397	2757	2832	2525	3122	3708	3512	3307	3508	3377.31
1068	unknown1418	0.00980952	0.0347873	24	21	739.28	0.0784162	0.9295	24.0327	17.9999	3501.25	0.00628467	0.0292609	24.0163	19.501	3074.95	824.906	0.268267	3914	4500	3281	3221	2451	2571	2054	2694	2781	2081	2400	3237	3362	3317	3585	3741	3074.38
1072	unknown1421	0.00421867	0.0189687	24	0	1113.34	0.0431948	0.9295	24.0327	6.63e-05	4009.99	0.00175123	0.0117929	24.0163	3.31e-05	3054.2	1430.46	0.468358	4000	5206	3267	3567	2368	1976	2474	2312	2364	1694	1862	2612	4581	3310	3374	3888	3053.44
1075	unknown1424	0.0065055	0.0255615	24	21	1597.71	0.00959186	0.9295	24.0327	17.9999	3532.24	0.000666551	0.00655947	24.0163	19.501	2406.97	1662.88	0.690861	3780	3772	3090	3423	1196	1308	1134	1370	1195	1038	1414	1644	3070	3866	3863	3330	2405.81
1077	unknown1426	0.0210199	0.0632056	18	12	753.245	0.0611263	0.9295	20	12	4593	0.00983836	0.0411595	19	12.0333	3738.32	911.613	0.243856	3312	3737	2801	2941	3556	3534	3209	3754	4115	4600	4700	4957	2848	2931	3287	3808	3630.62
1082	unknown1430	0.00164724	0.00965163	24	21	756.958	0.0521342	0.9295	23.7736	17.9999	3067.99	0.000889914	0.00783196	23.8868	19.4933	2544.62	809.656	0.318183	3410	3750	2595	2644	1938	2038	1721	1868	2340	1754	1954	2493	2886	2828	3009	3549	2548.56
1085	unknown1433	0.0210199	0.0632056	24	0	619.779	0.321075	1	23.6461	6.63e-05	4200.49	0.0404827	0.124231	23.8231	3.34e-05	3409.63	1004.96	0.29474	4363	5947	2963	3529	3728	2763	3257	2888	2688	2263	2103	3239	4379	3567	3562	3410	3415.56
1087	unknown1435	0.00267199	0.0134688	18	0	1202.08	0.0304759	0.9295	24.0327	17.9999	3849.74	0.00084817	0.00766885	21.0163	18.3786	2559.99	1547.48	0.604484	4282	5055	3411	3124	1648	1459	1398	1779	1930	1410	1438	1851	2976	4447	4888	3088	2761.5
1088	unknown1436	0.0065055	0.0255615	18	0	768.625	0.163695	0.980144	24.0327	6.63e-05	4608.99	0.00835411	0.0359933	21.0163	2.9e-05	3855.54	765.99	0.198673	5256	4617	4578	3985	3414	3388	2488	4292	3746	2682	3466	3591	4158	3904	5180	4466	3950.69
1101	unknown1448	0.00421867	0.0189687	24	0	1239.56	0.104287	0.946907	23.3952	6.63e-05	5843.74	0.00384027	0.0201556	23.6976	3.36e-05	4622.69	1590.7	0.344107	6447	7220	4122	5586	4598	4796	3292	4283	3130	3017	3457	3548	6119	5210	4137	5261	4638.94
1106	unknown1452	0.000320124	0.00340574	24	12	2522.96	0.0142143	0.9295	23.6461	12	10215.8	6.05e-05	0.00208755	23.8231	12.0007	7901.72	3182.63	0.402777	6414	6582	5307	5601	9606	9429	8435	8851	9367	10365	10154	10977	5868	6042	5703	7433	7883.38
1115	unknown1460	0.000987235	0.00692825	18	0	1016.11	0.0657392	0.9295	24.0327	17.9999	3382.49	0.000690709	0.00669917	21.0163	18.3786	2764.39	1009.29	0.365104	3972	4723	2904	3761	2227	1853	1906	1879	2340	1795	2308	3135	3339	3506	3040	3645	2895.81
1124	unknown1469	0.0144977	0.0475569	24	0	766.504	0.311725	1	24.2975	6.63e-05	4747.49	0.0289208	0.0963286	24.1488	3.3e-05	3876.6	1090.43	0.281284	5311	6630	3488	3561	3800	3014	3366	3200	3160	2700	2898	3741	4409	4521	4018	4125	3871.38
1127	unknown1471	0.00164724	0.00965163	18	0	738.75	0.108526	0.946907	24.4321	17.9999	2560.49	0.00172144	0.0116835	21.2161	18.4233	1935.77	1092.54	0.564393	3137	4984	2138	2333	1317	1072	1085	1307	1751	969	1408	1348	2424	2867	2330	2621	2068.19
1129	unknown1473	0.0210199	0.0632056	24	21	894.844	0.122593	0.961641	23.9024	17.9999	4275.74	0.0179381	0.065768	23.9512	19.497	3660.85	910.162	0.248621	4701	5352	3161	3808	3231	2813	2859	2871	2903	2669	3309	3824	4214	4370	4006	4513	3662.75
1135	unknown1479	0.00164724	0.00965163	24	21	1885.5	0.0143295	0.9295	24.0327	17.9999	4056.24	0.000275086	0.00416568	24.0163	19.501	2723.86	1944.23	0.713777	4466	4441	3908	3162	1360	1308	1146	1513	1735	1041	1481	1774	3435	4616	4756	3418	2722.5
1143	unknown1486	0.00421867	0.0189687	24	12	1296.13	0.109325	0.946907	20	12	7150	0.00400403	0.0206453	22	12.1	5673.27	1747.35	0.307997	4551	6108	3769	4002	6507	5292	5845	5273	5825	7120	7221	8434	4602	4450	4555	5569	5570.19
1152	unknown1494	0.00980952	0.0347873	24	21	968.029	0.132679	0.964981	23.6461	17.9999	3797.99	0.00994908	0.0415825	23.8231	19.4899	3131.87	975.026	0.311324	4203	4901	2849	3129	2562	2345	2154	2203	2621	1855	2692	3523	3463	4072	4123	3534	3139.31
1167	unknown1507	0.00164724	0.00965163	18	0	1357.29	0.049809	0.9295	24.4321	17.9999	3277.49	0.000853967	0.00767153	21.2161	18.4233	2148.24	1895.24	0.882231	4495	6463	3202	2793	1046	896	923	969	1136	822	913	1279	2563	3862	4190	2495	2377.94
1174	unknown1513	0.0065055	0.0255615	24	21	1137.2	0.0592535	0.9295	24.1644	17.9999	5639.49	0.00341569	0.0185106	24.0822	19.5053	4691.96	1114.48	0.23753	5692	6018	4258	4895	4118	3895	3624	3564	3727	3597	4083	4980	5326	5308	5642	6282	4688.06
1186	unknown1524	0.0065055	0.0255615	24	0	851.887	0.166622	0.980144	24.8451	6.63e-05	7722.49	0.00848427	0.0364092	24.4225	3.26e-05	6157.32	1672.23	0.271584	8752	9718	6231	6189	6333	5415	5389	5344	5512	3611	4293	5890	6707	6137	6526	6117	6135.25
1188	unknown1526	0.000572095	0.00471842	18	6	3468.01	0.167391	0.980144	20	5.99998	16791	0.000981924	0.00830657	19	6.01666	13004.1	3724.58	0.286416	12027	11559	11535	10393	16880	19037	12931	18316	10662	8870	11455	7424	10201	12709	12372	14473	12552.8
1191	unknown1529	0.00164724	0.00965163	18	6	1768.83	0.0705439	0.9295	20	6.00001	15458	0.00116902	0.00913693	19	6.01667	13755.1	1363.24	0.0991078	14124	15134	13065	13534	15537	14594	14576	17125	12045	9450	11323	12298	13832	14209	13660	12933	13589.9
1198	unknown1535	0.000987235	0.00692825	18	6	12105.1	0.10841	0.946907	20	6	90044.2	0.0010855	0.00880001	19	6.01667	78874.5	9385.44	0.118992	80237	88118	71004	76152	90368	88166	81030	100613	68346	52405	65115	69283	80158	83218	77363	72218	77737.1
1200	unknown1537	0.00421867	0.0189687	18	6	2644.93	0.250109	1	20	6.00001	10951.2	0.00828708	0.0358472	19	6.01667	8164.78	2829.21	0.346513	7424	7422	6112	5804	12551	12050	7198	12006	7203	4859	6715	4678	7044	7620	8158	8307	7821.94
1204	unknown1540	0.00421867	0.0189687	24	21	883	0.115111	0.947588	24.4321	17.9999	5182.49	0.00419091	0.0212989	24.2161	19.5149	4764.08	1151.23	0.241648	6665	6821	4773	4914	4408	3838	3462	3742	4258	3651	4108	4687	5194	5040	5231	5265	4753.56
1205	unknown1541	1.91e-05	0.000802606	18	6	78101.5	0.166494	0.980144	20	6.00002	265628	4.34e-05	0.00177358	19	6.01667	192915	71211.2	0.369132	181482	179656	139050	142256	283096	296597	193947	288872	139724	96345	131623	88778	181625	213390	195247	196881	184286
1206	unknown1542	8.77e-05	0.00171035	18	6	1405.91	0.159798	0.979097	20	6.00001	5582.75	0.000170612	0.00339187	19	6.01667	4297.91	1248.92	0.290589	3923	4352	3772	2989	5375	5779	5468	5709	3681	2300	3166	2451	3375	4847	4747	4411	4146.56
1208	unknown1544	0.0065055	0.0255615	18	6	1274.74	0.656017	1	20	6	6914.75	0.0275553	0.0924917	19	6.01667	5831.35	1022.55	0.175354	6581	5700	4310	4986	7538	8339	4468	7314	4976	3327	4773	3289	6282	5995	6382	7059	5707.44
1211	unknown1547	7.77e-06	0.000473861	18	6	3424.16	0.121754	0.960278	20	6	10862.5	1.41e-05	0.00108038	19	6.01667	7444.63	3463.42	0.465223	6315	6324	5285	4549	11162	11782	8636	11870	4900	3800	5292	3444	6406	8024	7076	7534	7024.94
1216	unknown1551	0.000572095	0.00471842	18	6	4847.22	0.178288	0.990633	20	5.99999	14661.8	0.00103941	0.00858903	19	6.01666	9929.79	4645.83	0.467868	8912	10455	5944	6060	14895	15619	10208	17925	6585	3499	6469	4050	9166	11637	9288	9157	9366.81
1217	unknown1552	0.000987235	0.00692825	18	0	1156.3	0.0321811	0.9295	24.0327	17.9999	3839.24	0.000360815	0.00464978	21.0163	18.3786	2603.55	1727.5	0.663515	5052	5746	2787	3719	1400	1144	1513	1474	1779	1179	1825	2281	3715	3936	3985	3721	2828.5
1218	unknown1553	0.0210199	0.0632056	18	6	2445.18	0.312412	1	20	6	8462.25	0.03957	0.121843	19	6.01667	5887.71	2623.35	0.445564	5058	7372	2868	2851	11176	8355	6084	8234	5590	2616	4160	3790	4798	6017	5285	4863	5569.81
1219	unknown1554	0.0065055	0.0255615	24	21	915.703	0.0273482	0.9295	24.0327	17.9999	3156.99	0.00171405	0.0116835	24.0163	19.501	2487.42	958.689	0.385415	3408	3659	2517	2855	1882	1783	1757	1890	1884	1530	1857	2138	2768	3258	3728	2874	2486.75
1220	unknown1555	0.0419656	0.10784	24	12	680.06	0.417847	1	24.0327	6	4595.25	0.0884395	0.235368	24.0163	9.00205	4092.28	701.384	0.171392	3430	4903	3010	3126	5562	4102	4589	4128	3926	4455	4334	5612	3641	3213	3917	3537	4092.81
1223	unknown1558	0.0144977	0.0475569	18	6	7309.19	0.185102	0.994309	20	6.00002	20908	0.0185719	0.0678618	19	6.01667	13863.3	7948.9	0.573377	8178	6802	7566	8125	22729	23602	17916	19385	8424	11054	10909	9818	15406	12493	11129	12865	12900.1
1224	unknown1559	0.00267199	0.0134688	24	21	2665.44	0.0222531	0.9295	23.9024	17.9999	10299.7	0.000638019	0.0064098	23.9512	19.497	8425.44	2868.14	0.340414	11109	11677	9810	8995	7056	6301	5340	6570	7088	5671	6796	7291	9392	9713	11862	10232	8431.44
1225	unknown156	1.91e-05	0.000802606	18	6	1723.93	0.248862	1	20	6	6342.75	6.3e-05	0.00208985	19	6.01667	4235.44	2254.95	0.5324	2899	2688	2515	2761	6788	7384	4650	6549	2162	2686	2852	2262	4626	4231	3754	4588	3962.19
1226	unknown1560	0.0144977	0.0475569	18	3	308.299	0.329597	1	20	8.03e-05	2305	0.0303125	0.0998101	19	1.58337	1980.06	620.971	0.313612	2244	3234	1792	1950	2304	1606	1922	1807	1368	1129	1517	1954	2847	3032	2178	2482	2085.38
1232	unknown1566	0.000572095	0.00471842	18	6	17220	0.0724173	0.9295	20	6	69327.2	0.000459516	0.00537271	19	6.01667	54324.8	13188.2	0.242765	54891	66658	43396	45417	76060	64026	65366	71857	41004	28370	33438	40967	54538	59013	49451	49175	52726.7
1235	unknown1569	4.22e-05	0.00116331	18	6	3868.93	0.170377	0.981551	20	6	14905	9.23e-05	0.00245256	19	6.01667	10874.8	4205.67	0.386736	8827	8846	8218	7449	14735	16049	12217	16619	7593	6860	8868	6631	9387	11159	10617	11767	10365.1
1237	unknown1570	7.77e-06	0.000473861	18	6	2661.73	0.126024	0.963963	20	6	7778.25	1.45e-05	0.00108038	19	6.01667	5264.74	2543.68	0.483154	4243	4646	3501	3288	8065	8425	6222	8401	3333	2657	3390	2258	4548	5793	5064	5470	4956.5
1238	unknown1571	4.22e-05	0.00116331	18	6	9068.82	0.105739	0.946907	20	6	24176.2	5.94e-05	0.00208755	19	6.01667	16386.5	7512.57	0.458461	14064	17790	10843	10718	25471	24125	19904	27205	11025	5528	8630	7110	15720	19627	14359	15499	15476.1
1239	unknown1572	0.000320124	0.00340574	18	6	2592.25	0.365014	1	20	6.00001	13034	0.00117488	0.00916619	19	6.01667	9789.75	3315.8	0.338701	8311	6881	8398	8244	11487	16144	9236	15269	6934	6609	8964	4975	8716	9727	9204	11108	9387.94
1240	unknown1573	7.77e-06	0.000473861	18	6	8118.29	0.112199	0.946907	20	6	24325.5	1.3e-05	0.00106498	19	6.01667	16564.4	7801.27	0.470967	13611	14551	11856	10351	24547	26937	19778	26040	10488	8305	10909	7363	14365	18039	15301	17463	15619
1241	unknown1574	0.00164724	0.00965163	18	6	42933.4	0.549824	1	20	6	226558	0.00725171	0.0324045	19	6.01667	167493	62385.1	0.372465	138386	118451	130519	121175	199803	282485	153356	270589	124394	109661	143716	80747	139289	165667	161151	219534	159933
1243	unknown1576	0.00164724	0.00965163	18	0	683.065	0.0315432	0.9295	24.1644	17.9999	2725.99	0.000564541	0.00599133	21.0822	18.3931	2084.23	925.068	0.443842	3257	3652	2111	3115	1732	1506	1265	1450	1165	1463	1586	2025	2750	2760	2834	2560	2201.94
1251	unknown1583	0.0144977	0.0475569	24	0	914.643	0.24274	1	25.2722	6.63e-05	6683.99	0.0234008	0.0811254	24.6361	3.23e-05	5260.54	1437.07	0.273178	7473	8920	5165	5178	4508	4216	4691	5130	5288	3770	3493	4261	5897	5168	5319	5246	5232.69
1252	unknown1584	0.000987235	0.00692825	24	0	1067.02	0.0762626	0.9295	22.7907	7.46e-05	5786.74	0.000790097	0.00734146	23.3953	3.83e-05	4696.57	1412.97	0.300852	6298	7060	4271	5518	4464	4925	3862	4596	3562	3372	3223	3593	5993	4872	4741	5271	4726.31
1262	unknown1593	0.0210199	0.0632056	24	3	1168.67	0.400542	1	23.7736	5.24e-05	8163.99	0.0486404	0.144652	23.8868	1.49295	6368.89	2206.85	0.346504	8883	12262	5035	6476	7260	6954	6017	6122	4752	3999	4142	5278	7772	5900	5003	6120	6373.44
1268	unknown1599	0.0144977	0.0475569	18	9	722.486	0.374422	1	20	6	5568.5	0.0337428	0.108153	19	7.6	4904.1	720.649	0.146948	4365	4963	3407	3543	6309	5392	5629	4944	4386	4594	4862	5605	4723	4645	4439	4393	4762.44
1272	unknown1601	0.0299489	0.0829149	24	12	806.809	0.678972	1	23.9024	12	5415.75	0.0995462	0.259347	23.9512	12	4706.11	1087.49	0.23108	3626	5957	3351	3491	6536	4545	5725	4167	4384	5010	4961	7308	4223	3998	3889	4099	4704.38
1279	unknown1608	0.00421867	0.0189687	18	6	5754.43	0.0337454	0.9295	20	6	55020.2	0.00140327	0.0103336	19	6.01667	49327.9	4886.78	0.0990673	47839	50750	48322	49705	57174	50698	54866	57343	41019	40651	43821	45767	49461	48823	46495	47038	48735.8
1290	unknown1618	0.0210199	0.0632056	24	0	735.037	0.295849	1	22.2166	6.5e-05	5203.25	0.037811	0.11787	23.1083	3.38e-05	4459.47	982.48	0.220313	5898	6579	3729	4607	4634	4669	4032	4001	3546	3378	3526	3772	5545	4544	4144	5249	4490.81
1291	unknown1619	0.0210199	0.0632056	24	21	1506.84	0.11995	0.960278	24.2975	17.9999	11175.5	0.0176064	0.0649368	24.1488	19.5099	9802.64	1576.77	0.160851	11418	12201	9113	9315	9146	9065	7180	8976	9350	8224	8757	9236	10894	11410	10396	12002	9792.69
1296	unknown1623	0.00421867	0.0189687	18	9	1045.28	0.127231	0.963963	23.6461	6	6689.5	0.00457843	0.0227607	20.8231	7.8476	5754.23	1181.32	0.205295	4812	6029	3807	4012	7823	6621	6330	5984	5551	6117	5934	7141	5217	4232	4438	5415	5591.44
1300	unknown1627	0.0144977	0.0475569	18	9	987.828	0.446902	1	24.0327	6	6923.75	0.0391282	0.120758	21.0163	7.87756	6120.54	967.69	0.158105	5625	6109	4136	4327	8595	6382	6586	6132	6420	5737	5698	7832	5752	5263	5597	5720	5994.44
1301	unknown1628	0.0419656	0.10784	24	3	766.857	0.507737	1	23.6461	4.95e-05	7093.24	0.103313	0.265488	23.8231	1.48897	5571.31	1950.73	0.350138	7305	11063	4659	5346	7014	4895	5652	5235	4564	3137	3419	4821	6744	5279	4927	5183	5577.69
1302	unknown1629	0.0299489	0.0829149	18	9	667.155	0.73527	1	23.7736	6	4133	0.106046	0.271543	20.8868	7.85741	3516.51	798.9	0.227186	2419	4487	2355	2304	5867	3359	4330	2976	3366	3271	3084	5664	2845	2542	2993	2672	3408.38
1303	unknown163	0.000572095	0.00471842	18	6	1319.46	0.59786	1	20	6.00001	5680.75	0.00307166	0.0172283	19	6.01667	4358.04	1406.8	0.322805	3705	3473	3050	3331	5550	7106	4298	5769	3141	1995	4061	2742	4594	4491	4470	5225	4187.56
1306	unknown1632	0.0299489	0.0829149	24	9	1249.63	0.254621	1	21.0501	6	9577.5	0.04481	0.135494	22.5251	7.43365	8129.67	1480.19	0.182072	7200	8547	6065	6654	11751	10164	8465	7930	7536	8304	8178	9607	7228	6628	6576	7766	8037.44
1311	unknown1637	0.0210199	0.0632056	18	9	809.637	0.344938	1	23.2718	6.00001	5367.25	0.0429717	0.130482	20.6359	7.81918	4617.65	896.266	0.194096	3485	5037	3175	3469	6661	5618	4736	4454	3899	5244	4555	5808	4018	3660	3506	4480	4487.81
1313	unknown1639	0.00267199	0.0134688	18	3	1075.51	0.118459	0.95517	22.7907	6.63e-05	4340.74	0.00286709	0.0163348	20.3953	1.69964	3066.2	1539.53	0.502099	3845	6338	3898	3282	3673	2317	2939	2307	2014	1384	1365	2417	4559	4374	4196	2703	3225.69
1334	unknown1658	0.0299489	0.0829149	18	6	4684.41	0.0551484	0.9295	20	6	39729.8	0.012232	0.04889	19	6.01667	34884.1	4214.3	0.120809	31317	37261	35380	34945	37941	38096	39667	43215	28528	27803	30536	34997	33772	31660	32116	32741	34373.4
1335	unknown1659	0.0065055	0.0255615	24	6	729.557	0.0407919	0.9295	20	6	7582.25	0.00245054	0.014882	22	6.05	6642.14	634.939	0.0955926	6251	6997	6891	6834	7602	7045	7643	8039	5518	5457	5775	6737	6610	6096	6099	6050	6602.75
1342	unknown1665	1.91e-05	0.000802606	18	6	3500.18	0.258635	1	20	6	8515	6.53e-05	0.0021411	19	6.01667	5359.51	3052.91	0.569625	3921	5069	3678	3093	9767	10464	5640	8189	1003	882	1328	836	7461	8533	4670	5299	4989.56
1344	unknown1667	8.88e-07	0.000240315	18	6	3540.13	0.129117	0.963963	20	6.00001	8752.5	1.95e-06	0.000589942	19	6.01667	5172.96	3507.33	0.678012	3646	3802	3682	3131	9493	9536	6207	9774	1287	974	1285	1344	5951	7359	4332	4164	4747.94
1346	unknown1669	0.0065055	0.0255615	18	6	484.368	0.564223	1	20	6	5182.75	0.0242528	0.0835439	19	6.01666	4742.95	482.38	0.101705	4379	3938	4739	4535	5384	5021	5248	5078	3861	4722	4556	4706	4783	4383	4785	4834	4684.5
1350	unknown1672	0.000320124	0.00340574	18	6	2674.98	0.173044	0.982915	20	6	8836.75	0.000598328	0.00623491	19	6.01667	5987.63	2863.53	0.478241	4244	6573	3792	3576	10841	9469	6316	8721	4173	3137	3376	2939	5276	6443	5955	5419	5640.62
1352	unknown1674	0.0210199	0.0632056	18	6	2315.6	0.0402147	0.9295	20	6.00002	27486.5	0.00682654	0.0310167	19	6.01667	25334	1651.58	0.065192	25038	27438	25027	26125	27217	27325	27055	28349	21398	23086	21311	24466	25155	25492	22842	24818	25133.9
1353	unknown1675	0.00267199	0.0134688	18	6	1848.38	0.214943	1	20	6	6221.5	0.00486014	0.023779	19	6.01667	4316.84	1692.48	0.392064	3841	5983	3318	3011	8940	5179	6588	4179	2191	1697	1582	2593	5636	4185	3791	3074	4111.75
1358	unknown168	0.00267199	0.0134688	24	12	1681.5	0.223878	1	24.5682	12	11246.8	0.0050378	0.0245097	24.2841	12.0016	9585.13	2258.26	0.235601	7374	7961	7134	8170	9042	12054	8981	12207	10525	10030	14552	9880	8625	8592	8039	10534	9606.25
1360	unknown1681	0.0065055	0.0255615	18	6	8955.51	0.63501	1	20	6	32815.5	0.0268073	0.0904017	19	6.01667	21696.8	9180.28	0.423116	15567	52395	13034	10723	58237	19165	28772	25088	10605	7857	7544	17245	14859	17397	17713	13149	20584.4
1361	unknown1682	0.0065055	0.0255615	18	6	2367.75	0.347812	1	20	6	10612.5	0.0160452	0.0606244	19	6.01667	8013.56	2272.92	0.283634	7100	12718	6029	5566	14935	8572	9223	9720	5285	4718	4639	7152	6456	7218	7940	6539	7738.12
1366	unknown1687	0.0299489	0.0829149	24	3	906.157	0.228824	1	24.4321	6.63e-05	11029	0.0410022	0.125381	24.2161	1.51354	10211.1	844.491	0.0827031	10732	11390	11709	10285	11155	9354	11394	10348	8958	8968	9225	10555	9668	9454	10342	9792	10208.1
1400	unknown1717	0.000171384	0.00241724	18	6	5427.04	0.161386	0.980144	20	6	16950.8	0.000317956	0.00444112	19	6.01667	7569.92	9730.2	1.28538	3593	1019	1472	2386	12112	25287	8588	21816	1791	1246	1217	807	9407	5681	3047	2784	6390.81
1412	unknown1728	0.0419656	0.10784	18	6	25025.9	0.667082	1	20	6.00002	88937.5	0.128096	0.316946	19	6.01668	63501.1	29248.8	0.460604	54435	16773	39517	44949	66122	102331	79209	108088	42265	54600	58912	35822	74805	54061	49843	77575	59956.7
1417	unknown1732	7.77e-06	0.000473861	18	6	16473.8	0.10574	0.946907	20	6.00001	37014.8	1.23e-05	0.00102703	19	6.01667	19806.1	17546.9	0.885936	15543	9210	5622	11032	37965	42970	28881	38243	5632	6014	5586	2923	24905	16279	11390	20681	17679.8
1418	unknown1733	2.89e-06	0.00035704	18	6	6700.54	0.0735775	0.9295	20	6	13613.5	3.48e-06	0.000631147	19	6.01667	6402.9	7456.09	1.16449	3709	1197	1715	2266	12858	14966	10625	16005	1180	1349	1165	761	7366	5162	2755	4911	5499.38
1421	unknown1736	2.89e-06	0.00035704	18	6	38261.7	0.0969947	0.945467	20	6.00001	83411.5	4.5e-06	0.000668666	19	6.01667	41961.7	42499.5	1.01282	28955	16228	10023	19591	83718	97800	62174	89954	9252	10347	9552	4734	53890	32443	20625	39699	36811.6
1422	unknown1737	8.88e-07	0.000240315	18	6	14390	0.0762928	0.9295	20	6	30105.8	1.19e-06	0.000589942	19	6.01667	13332.6	17377.2	1.30336	6686	1766	1946	3782	29031	34134	21327	35931	1546	1679	1505	733	15959	9307	4832	9465	11226.8
1424	unknown1739	0.0419656	0.10784	18	6	9491.14	0.408407	1	20	6	60316.8	0.0868331	0.232522	19	6.01667	24180.4	36135.6	1.49442	8298	22038	661	1769	101301	115383	14137	10446	4054	1341	850	768	14952	15110	1640	4076	19801.5
1428	unknown1742	0.00164724	0.00965163	18	3	4051.01	0.10853	0.946907	20	4.51e-05	12547.7	0.00172149	0.0116835	19	1.58335	9535.15	5786.85	0.606897	16100	15924	7669	10498	10706	10763	7691	6820	4871	4875	5969	4014	17951	15847	13059	15508	10516.6
1429	unknown1743	8.77e-05	0.00171035	18	3	138318	0.0397136	0.9295	23.3952	6.65e-05	469876	4.72e-05	0.00181386	20.6976	1.72483	326597	285829	0.875173	571211	592733	299826	415737	285467	303710	223985	231835	110807	115026	136056	106157	659919	588477	479364	519313	352476
1430	unknown1744	0.000171384	0.00241724	18	3	315535	0.238811	1	20	5.46e-05	735358	0.000454457	0.00534728	19	1.58336	638328	469791	0.73597	982553	922895	467372	568612	742346	797574	711367	525573	235224	262857	300165	160932	1310904	1193665	1036622	1269369	718002
1431	unknown1745	0.000572095	0.00471842	18	3	14714.2	0.315996	1	20	6.1e-05	44457.5	0.00173878	0.0117347	19	1.58336	40486	23758.2	0.586825	59546	53017	30690	34577	46647	48420	37523	38732	22943	19111	26718	14139	70323	79251	57837	72770	44515.2
1432	unknown1746	4.22e-05	0.00116331	18	6	3.02946e+06	0.479754	1	20	5.99999	8.33784e+06	0.000238948	0.0038842	19	6.01666	5.81616e+06	2.59576e+06	0.446302	6005998	4409874	2997632	3200024	8673208	9935678	8247210	6495262	2355158	2676185	3125595	1663426	7881651	6963257	5764149	7631396	5.50161e+06
1440	unknown1753	0.00980952	0.0347873	18	6	13110.8	0.0628781	0.9295	20	6	27713.2	0.00517558	0.025017	19	6.01666	14371	14333.3	0.997373	6053	4087	4537	5932	32596	24485	23804	29968	4588	7021	10732	5955	11134	10342	11889	9023	12634.1
1441	unknown1754	0.00164724	0.00965163	18	6	15066.7	0.0638725	0.9295	20	6	30100.5	0.00106892	0.00871641	19	6.01667	15039.7	16062.9	1.06803	5397	4491	4095	5695	33269	34280	25622	27231	4301	6276	8754	4817	13245	11417	11835	8766	13093.2
1442	unknown1755	0.00980952	0.0347873	18	9	4451.24	0.101172	0.946907	20	5.99999	16008	0.00785554	0.0345325	19	7.59999	8758.59	5293.52	0.604381	3436	2204	3069	3381	16700	18587	13052	15693	3891	4627	6333	3554	7644	7436	7887	5994	7718
1443	unknown1756	0.00980952	0.0347873	18	6	16176.1	0.0639032	0.9295	20	5.99999	32127	0.00524982	0.0252856	19	6.01666	16200.8	17179.5	1.06041	6086	3353	4718	5605	37210	34312	28470	28516	5765	7564	10312	6072	13315	10812	13963	9831	14119
1444	unknown1757	0.0144977	0.0475569	18	15	64421	0.580439	1	20	12	198492	0.0486199	0.144652	19	13.6167	141168	77795.5	0.551086	187869	83556	113809	230800	68431	95931	73782	113023	203295	197921	240023	152730	112638	126790	90140	155890	140414
1451	unknown1763	0.00164724	0.00965163	18	15	341914	0.414586	1	20	12	955804	0.00566084	0.0269653	19	13.6167	679447	399085	0.587367	935376	576479	557914	1024109	352626	442314	290210	491441	912901	987932	1097293	825090	548806	619205	423978	723641	675582
1452	unknown1764	0.000987235	0.00692825	18	15	524157	0.438033	1	20	12	1.37859e+06	0.00378216	0.0199231	19	13.6167	1.01737e+06	589393	0.579328	1464157	1026369	870223	1525589	518132	632420	390177	678545	1289696	1427574	1549933	1247140	807552	976776	649560	1132800	1.01167e+06
1457	unknown1769	0.00421867	0.0189687	18	15	455059	0.518695	1	20	12	1.47301e+06	0.0155902	0.0592155	19	13.6167	1.10576e+06	549503	0.496944	1453908	946079	890492	1700534	587137	780266	543603	866242	1364862	1468403	1754086	1304672	957139	1084747	705110	1199796	1.10044e+06
1459	unknown1770	0.00267199	0.0134688	18	15	319710	0.449954	1	20	12	877169	0.00928581	0.0393036	19	13.6167	661089	352925	0.533854	893711	666095	557702	1012579	335991	441686	302190	450503	792604	907337	993537	815198	561436	652654	428244	711274	657671
1462	unknown1773	0.0419656	0.10784	18	15	8319.11	0.30379	1	20	12	33356.8	0.0683628	0.190483	19	13.6167	27506.1	10090.2	0.366835	36637	25768	26096	34051	16406	21965	12450	22488	33960	33722	34760	30985	27527	27516	19961	34242	27408.4
1463	unknown1774	0.0065055	0.0255615	18	15	14424.4	0.27033	1	20	12	47692.2	0.012914	0.0510664	19	13.6167	39299.3	15980.6	0.406639	54577	43105	35108	49717	23378	28486	16157	28667	45690	48320	51903	44856	38960	39731	28839	48818	39144.5
1468	unknown1779	0.00267199	0.0134688	18	15	7971.92	0.416397	1	20	12	28845.5	0.00867953	0.0371735	19	13.6167	23472.3	9432.41	0.401853	30041	26577	20685	30763	13522	18266	11706	17992	26382	26769	35032	27199	21511	24918	16940	25792	23380.9
1471	unknown1781	0.0144977	0.0475569	18	15	154725	0.788524	1	20	12	516256	0.0625475	0.176782	19	13.6167	401677	183097	0.455832	568941	382747	286816	618359	240212	327996	194774	288457	435721	513246	648701	467356	366977	382218	235337	440605	399904
1472	unknown1782	0.00164724	0.00965163	18	15	86986.9	0.643938	1	20	12	236094	0.0083254	0.0359412	19	13.6167	175632	101263	0.576564	248765	187048	136371	288568	87833	115533	76187	109978	207900	233160	292631	210687	147240	167455	102790	182277	174651
1474	unknown1784	0.0144977	0.0475569	18	15	9008.89	0.0448112	0.9295	20	12	39516.8	0.00541755	0.0258633	19	13.6167	26401	13296.7	0.503643	28084	16980	18167	29274	17759	22038	17016	19985	41271	39433	42089	35274	23675	26124	19459	23728	26272.2
1475	unknown1785	0.00980952	0.0347873	18	15	8598.42	0.242522	1	20	12	34752.8	0.0167509	0.0625269	19	13.6167	28075.9	10440.7	0.371874	35939	27284	23921	33114	16468	23560	11924	22751	38817	31920	36247	32027	28906	30530	19889	34300	27974.8
1476	unknown1786	0.0144977	0.0475569	18	15	12247.6	0.412209	1	20	12	68303.5	0.0365736	0.114673	19	13.6167	57160.1	17219.2	0.301245	67073	61053	47968	67145	38003	51555	30101	50019	68621	66130	78669	59794	57315	61898	40455	66094	56993.3
1481	unknown1790	0.0299489	0.0829149	18	15	9835.5	0.208034	1	20	12	33636.8	0.0378704	0.117916	19	13.6167	28865.6	10292.3	0.35656	35944	37080	25919	35472	16429	21099	13781	21924	31496	32209	35826	35016	28756	33062	22248	33994	28765.9
1484	unknown1793	0.000987235	0.00692825	18	15	2271.05	0.0575888	0.9295	20	12	9398	0.0006126	0.00628568	19	13.6167	6808.86	3044.78	0.447179	7520	5378	5581	7481	4535	4855	3633	5480	10051	9820	9870	7851	6153	7202	5484	7576	6779.38
1485	unknown1794	0.000171384	0.00241724	18	15	2704.15	0.0727207	0.9295	20	12	8638	0.000153207	0.00321733	19	13.6167	6442.9	3042.59	0.472238	7730	5778	5348	7895	4098	4160	3263	4228	8313	8950	9244	8045	6170	6347	5247	7799	6413.44
1486	unknown1795	0.000987235	0.00692825	18	6	16939.5	0.417181	1	20	6	46363.8	0.00362221	0.0192444	19	6.01667	31602.7	13982.3	0.442439	33574	34362	16338	18122	53753	64189	36505	31008	7944	9907	10340	6585	52762	41909	26934	34302	29908.4
1487	unknown1796	0.00421867	0.0189687	18	6	14805.9	0.522834	1	20	6	40350.2	0.0156971	0.059465	19	6.01667	28739.1	10901.6	0.379329	33217	31062	12564	18498	49110	51282	31083	29926	6068	7822	10139	5813	53791	44430	25068	28815	27418
1488	unknown1797	0.000572095	0.00471842	18	6	9880.76	0.606158	1	20	6.00001	26483.8	0.00310951	0.0173731	19	6.01667	14781.6	12400.5	0.838917	12679	7365	2457	2726	25517	39756	25669	14993	1788	3004	3239	798	26644	21263	9880	14684	13278.9
1489	unknown1798	0.000320124	0.00340574	18	6	7189.86	0.778854	1	20	6	22095.5	0.00231796	0.0143383	19	6.01667	12899.7	9850.97	0.763657	10873	6484	2541	2782	23064	33341	21144	10833	1788	2037	2646	675	25751	19886	9518	13933	11706
1511	unknown1817	0.00267199	0.0134688	18	6	9099.93	0.0505958	0.9295	20	6	17695.8	0.00133959	0.010018	19	6.01667	8404.75	9859.85	1.17313	2658	2248	2077	2520	20287	19902	15453	15141	2223	3379	4258	2577	7114	4964	6061	4497	7209.94
1513	unknown1819	0.00164724	0.00965163	18	6	5476.54	0.0624681	0.9295	20	6	12589.8	0.0010477	0.00862463	19	6.01667	7036.55	5902.82	0.838879	3637	2777	2796	4387	14844	13919	10724	10872	2929	4090	5337	3128	5405	5459	5479	5357	6321.25
1542	unknown1845	0.0499351	0.128016	18	15	736.452	0.843614	1	20	12	3806	0.175543	0.400896	19	13.6167	3094	987.082	0.319032	3649	4198	2336	3144	2461	2782	1973	2647	3581	3755	4755	3133	2418	3133	2366	3020	3084.44
1579	unknown1879	0.0419656	0.10784	24	9	3187.99	0.949784	1	27.1385	6.00002	14580.8	0.168298	0.38783	25.5692	7.62077	12371.1	2341.74	0.189291	9653	26456	8711	8464	18370	13631	14515	11807	11203	16379	13042	13541	10992	6278	7105	10309	12528.5
1589	unknown1888	0.0210199	0.0632056	24	9	49089.1	0.902194	1	26.6465	6	153654	0.0941603	0.248028	25.3233	7.59913	114127	37323.8	0.327038	64378	319843	63361	62976	234162	151048	129672	99734	99278	160605	105063	142943	89044	37779	42451	57548	116243
1593	unknown1891	0.0210199	0.0632056	24	9	25785.5	0.892565	1	26.4865	6	79053.2	0.0933567	0.246529	25.2432	7.59229	56438.1	20393.2	0.361337	30316	164326	27391	31250	128264	79087	63915	44947	46620	79022	50106	72590	43670	14689	18697	25503	57524.6
1594	unknown1892	0.0065055	0.0255615	18	9	3292.64	0.384706	1	20	6	13299.8	0.0174948	0.0646906	19	7.6	9904.34	2936.34	0.29647	6851	5582	6550	6002	13896	16068	9832	13403	7291	9046	11498	6295	8569	10304	8606	9441	9327.12
1597	unknown1895	0.00164724	0.00965163	18	6	11019.2	0.0924333	0.93685	20	6	32522	0.00149061	0.0107037	19	6.01667	19551.7	13819.2	0.706802	12106	9320	11736	10421	38343	37015	24779	29951	9071	12833	16201	9338	16814	18789	15177	14139	17877.1
1598	unknown1896	0.000987235	0.00692825	18	6	9145.01	0.134645	0.965254	20	6	24711	0.00131939	0.00993557	19	6.01667	14145	11309.9	0.799571	7620	5625	7264	6784	30402	27018	17736	23688	4784	9836	9908	4822	13046	14941	11883	9034	12774.4
1599	unknown1897	0.0210199	0.0632056	18	6	3219.46	0.999593	1	20	5.99999	12788	0.102172	0.263107	19	6.01666	10839.5	2237.34	0.206407	10542	6702	5969	10870	13331	15940	11135	10746	5881	6224	7405	7895	23886	8117	8848	15603	10568.4
1607	unknown1903	0.00164724	0.00965163	18	6	1006.21	0.605146	1	20	6.00001	4704.5	0.0078858	0.0345952	19	6.01667	3811.57	931.555	0.244402	3200	3009	2756	3951	5446	5069	4106	4197	2716	2457	4000	2554	3519	3434	4579	4186	3698.69
1608	unknown1904	0.0065055	0.0255615	18	6	2434.57	0.716922	1	20	6	7721.25	0.0296994	0.0984675	19	6.01667	5755.39	2187.96	0.380159	4453	6141	2507	3104	8707	8099	6219	7860	3344	3630	5803	3961	7249	4519	6308	5940	5490.25
1646	unknown1939	0.0065055	0.0255615	18	9	1229.84	0.365681	1	25.7143	6	6427.25	0.0167503	0.0625269	21.8571	8.01429	5593.84	927.175	0.165749	3866	4694	4082	4595	6906	6442	5953	6408	5330	5221	7263	5598	5104	4486	5542	6590	5505
1663	unknown1954	0.0144977	0.0475569	18	15	1282.69	0.605552	1	20	12	5091.25	0.0503516	0.148315	19	13.6167	3214.57	2188.41	0.680778	2953	4628	3277	2216	1013	2495	1834	2721	7416	6591	3827	2531	1939	2690	2779	2184	3193.38
1713	unknown2	0.0065055	0.0255615	18	9	1223.47	0.117211	0.952205	20	6.00002	6195.75	0.00623654	0.0291308	19	7.60001	4630.45	1284.21	0.277341	3249	3384	3537	3045	6408	6507	5068	6800	3258	4610	4239	3722	3887	3300	4305	4729	4378
1715	unknown200	0.00267199	0.0134688	24	9	2674.1	0.0449823	0.9295	24.0327	5.99999	5505.75	0.0012051	0.00933467	24.0163	7.50102	3597.25	2686.18	0.746733	1782	967	3150	2185	4229	3920	7905	5969	3392	6433	5968	5474	1569	1110	1587	1946	3599.12
1726	unknown201	0.00421867	0.0189687	18	9	2478.06	0.00819041	0.9295	24.0327	6	4978	0.000389513	0.00488514	21.0163	7.87756	3424.85	2488.56	0.726618	1405	1165	1257	985	4467	4964	4721	5760	4957	4640	5474	4653	1200	1217	1170	1574	3100.56
1737	unknown202	0.00164724	0.00965163	18	9	39829.9	0.00971865	0.9295	24.0327	6	105187	0.000192786	0.00356736	21.0163	7.87756	79917.4	37746.6	0.472321	46790	43028	46329	46016	103108	112881	98385	106373	86830	112147	108360	94410	46050	44014	50948	54307	74998.5
1742	unknown2024	0.0144977	0.0475569	24	9	4443.81	0.718392	1	23.0287	6.00001	23465.2	0.0579546	0.165421	23.5144	7.47221	16230.7	5167.1	0.318353	10250	35973	8920	10689	37520	25663	16476	14202	12484	17611	14627	15465	13854	8284	6406	9556	16123.8
1748	unknown203	0.00421867	0.0189687	24	12	24755.1	0.00889909	0.9295	24.0327	6	58814.5	0.0004201	0.00512404	24.0163	9.00205	41058	24129.3	0.587689	24940	22614	23768	23084	56810	60682	56125	61641	53276	64293	62728	49479	23595	23493	24227	26465	41076.2
1755	unknown2036	0.0419656	0.10784	24	12	3229.36	0.323868	1	22.3291	12	15033.8	0.0720111	0.198225	23.1646	12.0156	11406.4	4136.51	0.362647	7597	7751	9425	8606	8052	12205	8640	18320	14574	12624	18130	14807	6499	10048	9505	13960	11296.4
1758	unknown2039	0.0419656	0.10784	18	9	1189.71	0.277672	1	23.0287	6.00002	5952.5	0.0635328	0.17888	20.5144	7.80105	4766.2	1305.29	0.273864	3127	5801	3228	3169	7760	5877	4881	5292	3922	6484	5739	3984	3656	2679	3409	4132	4571.25
1759	unknown204	0.00421867	0.0189687	18	9	2655.01	0.00908361	0.9295	24.0327	6	6299.75	0.000428025	0.00517695	21.0163	7.87756	4570.34	2697.11	0.590133	2420	2043	2268	1976	5493	6314	6086	7306	6170	5778	6857	5769	2236	2060	2133	2593	4218.88
1760	unknown2040	0.0419656	0.10784	18	9	12871.8	0.360238	1	23.52	5.99999	68779.2	0.0784889	0.213077	20.76	7.83795	55600.1	14876.5	0.267562	36538	74407	36969	35020	92931	66295	54957	60934	49633	74457	66443	47523	42154	32256	38934	46779	53514.4
1799	unknown2076	0.00980952	0.0347873	18	6	3635.94	0.15652	0.97563	20	6	7966.5	0.0114831	0.0463392	19	6.01667	4406.81	3775.38	0.856715	3325	1047	1309	2514	7979	10306	6926	6655	2333	2743	1565	1470	5257	4555	1409	3796	3949.31
1800	unknown2077	0.0144977	0.0475569	18	6	1425.35	0.493545	1	20	6	13231.8	0.0425017	0.129236	19	6.01667	5106.9	8244.69	1.61442	1210	2442	277	677	30105	18450	2703	1669	773	510	254	218	2200	3092	439	706	4107.81
1802	unknown2079	0.000987235	0.00692825	24	12	8245.93	0.0631146	0.9295	23.2718	12	25772.2	0.000665672	0.00655947	23.6359	12.0029	17121.8	11190.5	0.653584	13171	11166	7003	8404	21331	26132	12271	21660	32300	17096	30245	23448	10607	12009	11612	13381	16989.8
1804	unknown2080	0.000987235	0.00692825	18	6	1857.57	0.111633	0.946907	20	6	4158.5	0.00111455	0.00890407	19	6.01667	1950.65	2318.01	1.18833	973	298	329	681	4900	5002	3832	2900	467	755	410	253	2859	1524	793	740	1669.75
1805	unknown2081	0.000171384	0.00241724	18	6	11476.9	0.142444	0.966499	20	6	24779.8	0.000283686	0.00419234	19	6.01667	11386.8	14020.1	1.23126	5636	1170	1689	3795	30009	33410	18293	17407	1764	3098	1714	960	15556	10224	3952	6328	9687.81
1808	unknown2084	0.00267199	0.0134688	18	6	6185.06	0.0840551	0.9295	20	6	13263	0.00211146	0.0133692	19	6.01667	7251.66	6285.34	0.866745	4949	1946	2574	4821	13442	14959	11049	13602	3264	3880	3286	2176	8108	6943	3209	5632	6490
1812	unknown2088	8.77e-05	0.00171035	18	6	2966.84	0.0666898	0.9295	20	6	5815.75	7.63e-05	0.0022946	19	6.01667	2695.84	3234.02	1.19963	1270	569	584	1131	6668	6665	4712	5218	520	851	658	335	3497	1881	933	1371	2303.94
1813	unknown2089	0.000171384	0.00241724	18	6	2229.51	0.0661261	0.9295	20	6	4330.75	0.00014039	0.00310148	19	6.01667	2058.43	2359.55	1.14629	1061	501	453	885	4788	4843	3579	4113	451	788	532	265	2553	1655	737	1156	1772.5
1815	unknown2090	0.000320124	0.00340574	18	6	17795	0.079256	0.9295	20	6	32227.2	0.000293853	0.0042606	19	6.01667	14775.3	18141.2	1.2278	6976	2509	2283	5912	33605	39326	27562	28416	2668	4061	2622	981	19402	13027	4195	7687	12577
1819	unknown2094	0.00980952	0.0347873	18	9	638.164	0.550976	1	20	6.00002	5636.75	0.0336204	0.107914	19	7.60001	5104.08	553.936	0.108528	4089	4168	4593	5272	5651	5531	5457	5908	3850	5373	5413	5564	5209	4236	4635	4974	4995.19
1820	unknown2095	0.0210199	0.0632056	24	12	783.474	0.138884	0.965964	20.2759	12	4930.75	0.0199577	0.0718941	22.1379	12.0855	3819.59	1233.82	0.323023	3007	2844	2951	3175	3555	4160	2724	4574	5159	5313	5807	3444	2845	3653	3309	3496	3751
1827	unknown2100	0.000171384	0.00241724	18	6	6163.32	0.112243	0.946907	20	6	11426.5	0.000228121	0.00387044	19	6.01667	5740.42	5956.88	1.03771	3142	779	1919	2785	11154	9760	12509	12283	1027	2061	1670	1107	8087	5354	2495	4165	5018.56
1828	unknown2101	0.000320124	0.00340574	18	6	17309.3	0.120351	0.960278	20	6	31246.5	0.000430123	0.00517764	19	6.01667	15256.8	16807.7	1.10165	7782	1470	4159	6592	29153	26789	35378	33666	2254	4656	4226	2328	22369	13871	5739	11088	13220
1832	unknown2105	0.0210199	0.0632056	18	6	4098.74	0.411186	1	20	6	24833.2	0.0497063	0.147014	19	6.01667	10362.4	14719.8	1.42049	3717	6708	585	1348	43565	43406	6980	5382	2931	1028	961	680	8049	8082	1228	2609	8578.69
1834	unknown2107	0.00980952	0.0347873	18	6	39717.5	0.394785	1	20	6	266264	0.0253807	0.0864879	19	6.01667	104710	164745	1.57334	35892	40988	3708	11369	396675	542107	79456	46819	24406	7797	4726	4558	60508	68412	7409	21111	84746.3
1838	unknown2110	0.000572095	0.00471842	18	15	2930.25	0.596754	1	20	12	13240	0.00306661	0.0172223	19	13.6167	10535.3	3936.54	0.373652	12458	9258	12466	12581	6719	8318	7181	9519	14407	13295	14566	10692	8086	8839	9806	9764	10497.2
1839	unknown2111	0.0065055	0.0255615	18	15	953.003	0.397506	1	20	12	7018.25	0.0179923	0.0659109	19	13.6167	6081.09	1300.3	0.213827	6810	6293	5844	6143	5045	4603	4822	5967	7125	6969	6116	7863	5071	5284	6535	6606	6068.5
1846	unknown2118	0.00421867	0.0189687	18	6	8289.24	0.429397	1	20	5.99999	24564.5	0.0132485	0.0519625	19	6.01666	16870.1	8683.02	0.514698	14295	4172	9670	11773	23629	27518	20695	26416	12497	13734	13716	7827	19819	15444	12898	18984	15817.9
1847	unknown2119	0.000171384	0.00241724	18	6	180337	0.178234	0.990633	20	6	386144	0.000348115	0.0046096	19	6.01667	188275	207467	1.10194	117869	30100	37182	63019	335514	536420	276501	396141	38340	39877	39081	18376	266879	144554	80784	189504	163134
1849	unknown2120	8.77e-05	0.00171035	18	6	44035.8	0.165335	0.980144	20	6	92611.8	0.00017603	0.00345947	19	6.01667	45892.6	48871.5	1.06491	30715	7406	9475	17753	80773	115383	67909	106382	9187	10416	9765	4700	65484	37958	20626	45593	39970.3
1851	unknown2122	8.77e-05	0.00171035	18	6	20785.4	0.145982	0.966499	20	6	43671.2	0.000157019	0.00325307	19	6.01667	22399	22189.5	0.990647	15832	4510	5502	10636	41743	50919	33222	48801	5365	6370	5618	3131	30139	19057	11134	23382	19710.1
1853	unknown2124	0.00980952	0.0347873	18	6	8162.84	0.401112	1	20	6	78289.8	0.0257249	0.0875697	19	6.01667	29324.2	49440.3	1.68599	5348	17476	1055	1926	154530	133998	12511	12120	3690	1583	926	1008	9567	12496	1723	3371	23333
1854	unknown2125	8.77e-05	0.00171035	18	6	39640.4	0.176481	0.990633	20	6	86071.5	0.000186888	0.00356102	19	6.01667	42717.1	45288.1	1.06019	27543	7686	9035	17837	66616	108311	63692	105667	7826	9779	9997	4838	59958	34123	19556	43201	37229.1
1855	unknown2126	0.000572095	0.00471842	18	6	4215.06	0.296334	1	20	6	23166.5	0.00164148	0.0113904	19	6.01667	8903.72	14616.9	1.64167	2069	2545	342	825	36033	42826	6286	7521	1579	428	308	239	5901	4625	1015	1577	7132.44
1856	unknown2127	2.89e-06	0.00035704	18	6	51573.2	0.097507	0.945467	20	6	138579	4.53e-06	0.000668666	19	6.01667	57154.8	84156.9	1.47244	22525	7543	5247	9590	156846	209106	76054	112311	7016	5144	3775	2462	54320	42751	13014	23603	46956.7
1860	unknown2130	1.91e-05	0.000802606	18	6	235585	0.105704	0.946907	20	6	560440	2.85e-05	0.00148587	19	6.01667	266865	302131	1.13215	161467	89111	48703	102743	530284	743624	368326	599524	50451	51590	51856	23095	331370	184957	106562	240385	230253
1863	unknown2133	0.00980952	0.0347873	18	6	5194.05	0.290597	1	20	6	20355.8	0.0195559	0.0707713	19	6.01667	15203.2	5608.77	0.36892	13526	9851	9927	11835	20494	23263	18224	19442	12118	13322	13127	8455	16560	12197	12476	17560	14523.6
1864	unknown2134	0.0210199	0.0632056	18	6	36412.5	0.17002	0.981551	20	6	132457	0.023709	0.0819967	19	6.01667	91159.3	44402.6	0.487088	76089	56361	53204	63457	125754	164706	104791	134576	74351	68061	79496	47001	97259	69451	65175	92726	85778.6
1865	unknown2135	0.0299489	0.0829149	18	6	1636.95	0.453322	1	20	6.00001	20647.5	0.0719476	0.198225	19	6.01667	7924.85	12456	1.57176	1195	11437	196	403	37309	40896	2510	1875	1409	270	212	194	2285	1809	352	295	6415.44
1869	unknown2139	0.000987235	0.00692825	18	6	24243.2	0.158059	0.97563	20	6	77379.8	0.0015238	0.0108343	19	6.01667	32150.6	46516	1.44681	16261	6115	2138	5617	80752	135541	36110	57116	7017	3042	2277	1618	32068	20840	4311	13398	26513.8
1871	unknown2140	0.00164724	0.00965163	18	3	1698.65	0.231432	1	20	6.63e-05	6593	0.00338228	0.0183986	19	1.58336	5585.73	1877.39	0.336104	7759	6159	5009	7445	5808	7364	4544	6154	3444	4049	4523	3226	8398	7991	5108	7485	5904.12
1873	unknown2142	0.0210199	0.0632056	18	3	2104.35	0.332903	1	20	5.99998	7014	0.0417208	0.127219	19	4.43332	6325.78	2110.26	0.333597	7856	6231	5093	7717	6574	8889	4987	7606	3159	4005	4644	3280	9302	8247	5350	7823	6297.69
1874	unknown2143	0.00421867	0.0189687	18	3	1840.6	0.167915	0.980144	20	6.63e-05	6308.75	0.00584591	0.0277552	19	1.58336	5320.92	2160.76	0.406088	7701	5716	4907	6911	5880	6152	4756	6776	2972	3408	3690	2896	7972	8545	5112	7604	5687.38
1875	unknown2144	0.0210199	0.0632056	18	6	3104.73	0.351458	1	20	5.99997	11966.5	0.0436455	0.132343	19	6.01665	10191.7	1347.41	0.132207	13046	9083	7217	11522	12045	13583	8554	13684	4634	5142	5359	4057	15103	15717	8243	13465	10028.4
1876	unknown2145	8.88e-07	0.000240315	18	6	10327.6	0.0659397	0.9295	20	6	24187.2	1.03e-06	0.000589942	19	6.01667	10754.9	13851.8	1.28795	4965	2438	2212	3069	24020	27644	15977	29108	1435	1562	1484	930	10936	7250	4270	7921	9076.31
1877	unknown2146	8.88e-07	0.000240315	18	6	95501.1	0.0733737	0.9295	20	6	251362	1.14e-06	0.000589942	19	6.01667	106182	149844	1.41119	39894	19475	14680	23527	241444	319627	143846	300532	9915	10386	9320	4607	108648	64787	33000	64700	88024.2
1878	unknown2147	8.88e-07	0.000240315	18	6	20787.2	0.0672661	0.9295	20	6	52803	1.05e-06	0.000589942	19	6.01667	22346.1	31389.7	1.40471	8513	4190	3263	5398	51305	64341	31280	64286	2020	2266	2136	864	22365	13295	7019	14135	18542.2
1880	unknown2149	0.0299489	0.0829149	24	21	1116.7	0.112069	0.946907	20	17.9999	6991.25	0.0224771	0.0786153	22	19.525	6054.38	1105.22	0.182549	8619	6242	5297	7282	3737	4623	3714	4813	6946	5724	7456	6085	6393	7681	6476	7415	6156.44
1884	unknown2152	0.000320124	0.00340574	18	6	1771.66	0.28038	1	20	6	5357.75	0.000926143	0.00805261	19	6.01667	2565.37	2918.11	1.1375	1553	405	565	798	3527	7582	2881	7441	599	505	406	345	4142	2180	1123	1336	2211.75
1885	unknown2153	8.77e-05	0.00171035	18	6	14756.8	0.27616	1	20	6	45530	0.000281601	0.00419015	19	6.01667	20272.9	26205.8	1.29265	11215	1802	3572	4699	26545	71423	22104	62048	2791	2115	1313	910	32584	15041	7353	8041	17097.2
1886	unknown2154	8.77e-05	0.00171035	18	6	12886.7	0.0750403	0.9295	20	6	30627.8	8.51e-05	0.00239254	19	6.01667	13185.1	17905	1.35797	6762	2590	1477	4123	24326	40913	19630	37642	2275	1866	1656	925	14525	6588	3358	7590	11015.4
1887	unknown2155	0.000171384	0.00241724	18	6	9262.75	0.0690354	0.9295	20	6	22968.2	0.000146058	0.00316458	19	6.01667	10978.8	12310.5	1.12129	6677	3994	2239	4891	20826	28365	15287	27395	4164	2521	2874	2136	12187	6520	4501	7216	9487.06
1888	unknown2156	8.77e-05	0.00171035	18	6	65205.1	0.0804708	0.9295	20	6	164212	9.08e-05	0.00245256	19	6.01667	69327.1	97382.1	1.40468	33821	15787	5568	17178	131441	232670	96819	195918	10446	8049	7092	3642	69540	36756	15046	40648	57526.3
1889	unknown2157	8.77e-05	0.00171035	18	6	3298.83	0.246055	1	20	6	10206.2	0.000253393	0.00401902	19	6.01667	4649.18	5767.68	1.24058	2542	678	849	1353	6803	16105	5113	12804	856	647	449	431	7257	3482	1758	2077	3950.25
1890	unknown2158	8.77e-05	0.00171035	18	6	3377.85	0.233453	1	20	6	10157	0.000241492	0.00390172	19	6.01667	4510.26	5867.4	1.3009	2276	465	762	1075	6580	15263	5132	13653	588	481	359	248	7139	3390	1678	1699	3799.25
1891	unknown2159	0.0210199	0.0632056	18	6	3137.26	0.972314	1	20	6	14764.2	0.0999488	0.259762	19	6.01667	12168.4	3261	0.267989	11959	4771	7888	10194	14931	14422	13223	16481	11524	8904	12094	10046	13401	14634	10885	13015	11773.2
1892	unknown216	0.0299489	0.0829149	18	6	1228.6	0.705298	1	20	5.99999	6019.25	0.102602	0.263974	19	6.01666	5136.76	970.258	0.188885	4142	4160	5303	4198	4810	6410	6189	6668	4103	6161	4562	3830	4662	4696	4817	5596	5019.19
1897	unknown2164	0.0299489	0.0829149	18	6	4955.93	0.986765	1	20	6.00001	21246.8	0.133624	0.326705	19	6.01667	17155.3	5049.86	0.294362	15220	8869	9995	13338	19523	22950	17239	25275	12565	13454	15796	13355	21004	19399	15795	20916	16543.3
1899	unknown2166	8.77e-05	0.00171035	18	6	649.124	0.230115	1	20	6	2594.75	0.000238329	0.0038842	19	6.01667	1147.44	1500.88	1.30803	535	234	186	276	2513	4655	1058	2153	257	190	161	100	1096	1102	340	593	965.562
1900	unknown2167	0.000987235	0.00692825	18	6	3004.14	0.15785	0.97563	20	6	7690.75	0.00152199	0.0108343	19	6.01667	3584.05	4242.58	1.18374	2586	455	461	1319	6717	9388	4686	9972	612	662	465	266	5661	3226	893	1750	3069.94
1901	unknown2168	0.000320124	0.00340574	18	6	4647.46	0.146572	0.966499	20	6	11720.8	0.000514588	0.0057427	19	6.01667	5344.18	6578.46	1.23096	3975	571	548	1663	10307	14739	6962	14875	776	849	526	249	8039	5005	1111	2557	4547
1902	unknown2169	0.000320124	0.00340574	18	6	21358.9	0.208526	1	20	6	55722.5	0.000708562	0.00684837	19	6.01667	25976.3	30779.6	1.18491	20356	2851	2403	8037	49987	72485	31709	68709	3845	3239	2224	1230	43905	28022	5078	11862	22246.4
1905	unknown2171	0.00267199	0.0134688	18	6	21136.7	0.694928	1	20	6.00002	60755	0.0135343	0.0529391	19	6.01668	41802.4	22088.7	0.528409	33983	4881	21341	28790	62212	68917	44031	67860	32196	25266	32572	25627	49741	48615	37078	42900	39125.6
1906	unknown2172	0.0065055	0.0255615	18	6	1900.7	0.608788	1	20	6	8363.5	0.0258674	0.0878476	19	6.01667	6528.17	2034.02	0.311576	6177	4158	4154	5358	7878	8637	6808	10131	5134	4765	5956	4247	7217	6891	5955	7041	6281.69
1908	unknown2174	0.000171384	0.00241724	18	6	5018.16	0.182334	0.993547	20	6	14854.2	0.000355413	0.00464887	19	6.01667	6728.84	8455.09	1.25655	3421	756	1342	2060	10254	22900	7882	18381	1689	1315	998	656	8365	5500	2934	2815	5704.25
1909	unknown2175	4.22e-05	0.00116331	18	6	706.046	0.15956	0.979097	20	6	2011.75	8.69e-05	0.00242333	19	6.01667	948.418	1106.66	1.16685	445	168	278	384	1235	2915	1242	2655	286	258	205	222	1101	660	490	485	814.312
1910	unknown2176	0.0299489	0.0829149	18	6	7730.27	0.937066	1	20	6	33500.5	0.128345	0.31738	19	6.01667	26318.8	8822.45	0.335215	22273	13429	14040	19625	30641	36176	26693	40492	22463	18571	24510	20626	31314	30448	22683	30011	25249.7
1911	unknown2177	0.000987235	0.00692825	24	12	2997.07	0.0290832	0.9295	23.52	12	10160	0.000328987	0.00445769	23.76	12.0012	7306.78	3791.17	0.518857	5537	5795	3812	4472	8976	10529	6707	8008	9917	10225	11230	9268	6009	5335	3774	6841	7277.19
1914	unknown218	0.0210199	0.0632056	18	6	3381.21	0.939728	1	20	6	9495.25	0.0972725	0.254342	19	6.01667	6637.08	3260.29	0.491224	7011	259	2961	5010	10446	11114	7585	8836	3495	5089	4043	2994	11283	7144	4664	7938	6242
1919	unknown2184	0.000320124	0.00340574	18	6	1291.88	0.160532	0.979097	20	6	3551	0.000558921	0.00596682	19	6.01667	1674.7	1955.34	1.16758	884	274	449	582	2489	5008	2114	4593	461	466	355	253	2137	1284	787	868	1437.75
1921	unknown2186	2.89e-06	0.00035704	18	3	1302.84	0.0269161	0.9295	24.4321	6.63e-05	4369.98	1.35e-06	0.000589942	21.2161	1.76803	2870.68	3226.82	1.12406	4580	3392	4357	5151	1272	1199	1042	1043	932	846	986	841	5169	8870	5274	4578	3095.75
1922	unknown2187	0.00421867	0.0189687	18	6	7005.31	0.742025	1	20	6	27976.5	0.0211819	0.0753019	19	6.01666	20758.7	8255.73	0.3977	16853	11093	11664	15186	25280	30639	21384	34603	15140	13126	17868	13243	24481	23509	19633	22430	19758.2
1923	unknown2188	0.00421867	0.0189687	18	6	65031.6	0.895584	1	20	6.00001	186935	0.0248548	0.0852783	19	6.01667	131720	66171.1	0.502363	104758	15335	56441	95171	194146	215011	149079	189503	98204	78826	99795	88540	181827	171814	102589	138177	123701
1925	unknown219	0.000320124	0.00340574	24	12	6751.81	0.0544131	0.9295	22.4427	12	40872	0.000208295	0.00370531	23.2214	12.0135	32608.8	9247	0.283574	24004	24823	26690	26777	27352	36117	29830	39905	40849	34191	44661	43787	27830	28220	29831	33198	32379.1
1927	unknown2191	0.000320124	0.00340574	18	6	8414.57	0.251835	1	20	6	23317.5	0.000840512	0.00764583	19	6.01667	13880.2	10232	0.73717	7858	5092	6102	7608	26370	25331	17424	24145	6134	6295	6616	6677	17008	16301	11424	11859	12640.2
1928	unknown2192	2.89e-06	0.00035704	18	3	1333.6	0.0181525	0.9295	24.5682	6.63e-05	4598.48	9.31e-07	0.000589942	21.2841	1.77371	3182	3301.53	1.03756	5058	3646	4238	5452	1593	1584	1350	1356	1138	1013	1515	1018	6130	8235	5529	5606	3403.81
1930	unknown2194	0.0419656	0.10784	18	12	226.628	0.438791	1	24.4321	12	5634.5	0.0919719	0.243273	21.2161	12.2822	5216.82	646.25	0.123878	4946	4390	5022	5339	5553	5202	5599	5590	4565	6409	6163	5401	4587	3972	4853	5126	5169.81
1932	unknown2196	0.000572095	0.00471842	18	6	6460.66	0.472643	1	20	6	15832	0.00249187	0.0150695	19	6.01667	10344.8	6144.43	0.593961	6803	2901	5471	6602	15906	17089	12237	18096	5791	5858	5990	5873	12539	12207	9718	10523	9600.25
1934	unknown2198	0.00267199	0.0134688	24	21	1395.12	0.0205971	0.9295	24.4321	6.63e-05	2756.99	0.000594797	0.00623491	24.2161	22.7026	2093.27	1562.15	0.746272	3089	2287	2553	3099	1127	1108	990	1002	978	1046	1143	1028	2849	4681	3292	2992	2079
1935	unknown2199	0.0299489	0.0829149	24	21	842.341	0.190414	0.994309	24.0327	6.63e-05	4725.49	0.0351675	0.111635	24.0163	22.5154	4109.02	922.451	0.224494	6027	4564	3821	4490	3320	3770	2906	4026	3892	2880	4100	3010	4505	5374	4181	4868	4108.38
1937	unknown220	0.0065055	0.0255615	18	9	682.181	0.70503	1	20	5.99999	4018	0.0292835	0.097312	19	7.59999	3386.98	652.616	0.192684	2742	2757	1843	2730	4417	4904	3054	3697	2341	3661	3773	3325	3035	3581	3008	3271	3258.69
1938	unknown2200	0.0210199	0.0632056	18	6	2795.55	0.819798	1	20	6	5527.5	0.0872111	0.233101	19	6.01667	4183.87	1313.63	0.313973	6938	1404	1701	3384	5606	6508	4310	5686	1344	1545	1387	683	7661	7640	3128	5470	4024.69
1939	unknown2201	0.0210199	0.0632056	18	6	1234.96	0.81494	1	20	6	2477.75	0.0867962	0.232522	19	6.01667	1850.09	628.914	0.339938	2746	734	695	1535	2484	2904	1936	2587	578	741	611	401	3466	3162	1406	2396	1773.88
1940	unknown2202	0.000572095	0.00471842	18	6	29004.1	0.131092	0.964981	20	6	59658.5	0.000787323	0.00733141	19	6.01667	33239.9	28534	0.858425	16920	7055	12660	18586	65642	56020	53721	63251	12832	13955	15067	17197	34213	34487	28389	26520	29782.2
1941	unknown2203	0.000320124	0.00340574	18	6	15018.2	0.150557	0.966499	20	6.00001	34740.2	0.000527286	0.00582521	19	6.01667	17047.7	18140.9	1.06413	14042	3383	2677	8456	32814	37351	23166	45630	3666	3185	3251	1468	25827	16044	4993	11637	14849.4
1942	unknown2204	0.000320124	0.00340574	18	6	4130.56	0.136219	0.965964	20	6	8639.75	0.000481433	0.005516	19	6.01667	4543.23	4110.99	0.904861	5420	982	1027	2588	8239	10341	6672	9307	1108	892	1114	503	5901	5057	1765	3805	4045.06
1943	unknown2205	0.000572095	0.00471842	18	6	7344.01	0.168177	0.980144	20	6.00001	17205.2	0.000986083	0.00830986	19	6.01667	8541.35	8927.08	1.04516	6476	1757	1591	4271	16135	19373	11664	21649	1827	1597	1792	901	13902	7817	2571	6030	7459.56
1944	unknown2206	0.000171384	0.00241724	18	6	4238.04	0.157038	0.97563	20	6	10176	0.000310125	0.00441767	19	6.01667	5123.56	5232.41	1.02124	3382	1227	1184	2726	9597	11066	6953	13088	1366	1172	1490	737	7984	4544	1818	3498	4489.5
1945	unknown2207	0.0210199	0.0632056	24	21	1445.33	0.184051	0.993547	20.2759	17.9999	6044.99	0.0253589	0.0864879	22.1379	19.5118	4686.01	1378.64	0.294203	6621	6505	3650	5272	2988	3114	2458	2916	4695	4137	6052	4279	5685	5180	4675	8640	4804.19
1946	unknown2208	0.0144977	0.0475569	24	21	1362.24	0.201767	1	20	17.9999	5865.24	0.0199917	0.0719569	22	19.525	4571.9	1312.16	0.287006	6497	6629	3505	4924	2956	3101	2383	2602	4679	4180	5878	4294	5604	5017	4416	8424	4693.06
1947	unknown2209	0.00267199	0.0134688	18	6	2898.43	0.158171	0.97563	20	6	8563.5	0.00370606	0.0195698	19	6.01667	5092.12	3630.41	0.712946	4074	2771	1794	3145	8008	10217	6106	9923	2988	2377	3042	2023	6698	4436	2800	4033	4652.19
1948	unknown221	0.00980952	0.0347873	18	9	510.531	0.596715	1	20	6	4785.25	0.0359446	0.11344	19	7.6	4255.78	518.69	0.121879	3779	3411	3691	3777	4208	5159	4479	5295	3817	5160	4104	3488	3811	3782	3992	4508	4153.81
1952	unknown2213	0.000572095	0.00471842	18	6	7519.02	0.621028	1	20	6	28272	0.00317718	0.0176148	19	6.01667	20675.4	8357.28	0.404215	16180	12667	15036	12899	29097	32096	20933	30962	13449	11689	17249	10120	23272	23938	20420	24595	19662.6
1955	unknown2216	0.000171384	0.00241724	24	21	1430.48	0.0104997	0.9295	24.1644	17.9999	3061.49	2.56e-05	0.00139602	24.0822	19.5053	1785.35	1528.33	0.856038	2768	2566	2191	2739	800	720	693	635	768	636	930	788	2847	3763	2672	2964	1780
1956	unknown2217	0.00164724	0.00965163	18	6	2744.63	0.703085	1	20	6.00001	7071	0.00898833	0.0381564	19	6.01667	4503.45	2770.27	0.615143	3843	1780	1759	2541	7603	9039	5623	6019	1836	2097	2058	1241	8404	5920	2658	4263	4167.75
1962	unknown2222	0.000171384	0.00241724	18	6	5692.21	0.666102	1	20	6.00002	12835.5	0.00115049	0.00905748	19	6.01667	7951.79	5131.58	0.645337	7362	2796	2717	4817	15573	15695	10087	9987	1750	2068	1912	1473	15775	11198	5212	8857	7329.94
1966	unknown2226	0.00980952	0.0347873	18	6	1059.25	0.779381	1	20	6	3847.5	0.0449062	0.13569	19	6.01667	2968.75	984.558	0.331641	2880	1744	1521	2555	3931	4318	3612	3529	2035	2509	2404	1890	4114	3246	2290	3013	2849.44
1967	unknown2227	0.0065055	0.0255615	18	15	9925.13	0.69299	1	20	12	29757.2	0.0288611	0.0962036	19	13.6167	24050.3	10938.4	0.454815	39518	26122	16599	34155	13736	15998	11485	16537	29143	27902	34894	27090	23621	27534	13985	24791	23944.4
1969	unknown2229	0.0299489	0.0829149	18	15	2836.21	0.773764	1	20	12	9967.5	0.110415	0.28041	19	13.6167	8187.34	3390.98	0.414174	12404	8818	5764	12072	5012	6141	3911	5934	8787	9683	12360	9040	7914	8862	4988	8782	8154.5
1972	unknown2231	0.00421867	0.0189687	18	15	1842.54	0.637899	1	20	12	4736	0.0186164	0.06791	19	13.6167	3726.76	1982.24	0.531895	6307	5014	2661	4949	1942	2410	1653	2111	4314	4463	5489	4678	3291	3766	2495	3778	3707.56
1973	unknown2232	0.0065055	0.0255615	18	15	5559.98	0.474159	1	20	12	15960.5	0.0209179	0.07467	19	13.6167	12280.8	6068.75	0.494165	18281	12928	8268	17443	5940	8279	5815	8924	16112	14542	18571	14617	11861	14029	7975	11968	12222.1
1978	unknown2237	0.00980952	0.0347873	18	15	3104.73	0.626298	1	20	12	8435.25	0.0374294	0.116933	19	13.6167	6128.38	3594.72	0.586569	8301	4185	5432	11031	2533	3586	3264	4248	7927	8623	9822	7369	6156	5605	3519	5896	6093.56
1979	unknown2238	0.0144977	0.0475569	18	15	3758.63	0.571468	1	20	12	14238.5	0.0479975	0.143286	19	13.6167	11787.1	4092.33	0.347186	16080	12717	7899	15434	6333	10470	6105	10020	13081	13684	16265	13924	11716	11898	9065	13269	11747.5
1982	unknown2240	0.0210199	0.0632056	18	15	7542.35	0.210227	1	20	12	31225.5	0.0283778	0.0947384	19	13.6167	26502.1	8759.96	0.330539	32679	32250	22059	30115	15118	20687	12812	22205	32120	28159	33713	30910	28044	31767	20361	29677	26417.2
1983	unknown2241	0.0299489	0.0829149	18	15	9626.02	0.836175	1	20	12	21992	0.117379	0.295839	19	13.6167	18025.7	10299.4	0.571374	36293	15248	16217	32282	6012	8671	2716	14830	25183	15015	26052	21718	11157	21080	13065	21276	17925.9
1984	unknown2242	0.00421867	0.0189687	18	15	8374.27	0.580037	1	20	12	31684	0.0171604	0.0637763	19	13.6167	23933.6	10958.2	0.457859	30894	23250	18155	33449	14047	19292	12920	19399	29643	31686	39508	25899	20712	22236	16166	23983	23827.4
1985	unknown2243	0.00980952	0.0347873	18	15	3668.65	0.327892	1	20	12	11833	0.0216773	0.07656	19	13.6167	8483.01	4318.56	0.509083	10184	7615	5865	11686	5144	5782	5276	5885	8766	13162	14062	11342	8374	7692	4897	9327	8441.19
1986	unknown2244	0.000572095	0.00471842	18	15	11168.2	0.38634	1	20	12	35597.2	0.00208143	0.0132538	19	13.6167	27601.5	13254.1	0.480194	35895	31355	25135	36848	16006	19628	11631	20796	32472	36820	39683	33414	23765	27101	18874	30147	27473.1
1987	unknown2245	0.00421867	0.0189687	18	15	3535.89	0.560698	1	20	12	9215.5	0.0166685	0.0624349	19	13.6167	6705.5	4072.63	0.607356	8907	5988	5846	11916	3043	3634	3413	4311	8469	10098	9716	8579	6322	6360	3993	6062	6666.06
1989	unknown2247	0.00164724	0.00965163	18	15	4467.15	0.393027	1	20	12	13184.5	0.00540105	0.0258129	19	13.6167	9434.4	5224.05	0.553724	11691	7646	8820	13928	4748	6420	4625	7662	14033	12853	14372	11480	7781	8949	5583	9550	9383.81
1990	unknown2248	0.00267199	0.0134688	18	15	7437	0.439149	1	20	12	19644	0.00909136	0.0385559	19	13.6167	14456.9	8054.75	0.557157	20594	15590	10126	21108	7857	9400	6638	9322	18571	20947	20880	18178	12046	13233	9022	16550	14378.9
1994	unknown2251	0.0419656	0.10784	18	15	2872.97	0.384705	1	20	12	13128	0.082759	0.22313	19	13.6167	11398.2	3502.07	0.307247	13568	13103	11300	14042	8046	9298	5396	9516	12121	13166	13395	13830	10016	11682	9051	14299	11364.3
1995	unknown2252	0.00267199	0.0134688	18	15	3227.94	0.283608	1	20	12	9342	0.00620265	0.0290351	19	13.6167	6543.68	3787.28	0.57877	8217	5589	4524	10013	4121	3425	3701	4222	7924	9973	10077	9394	6183	6486	4014	6249	6507
1996	unknown2253	8.77e-05	0.00171035	18	15	3336.48	0.352023	1	20	12	7460.75	0.000351466	0.00463978	19	13.6167	5312.62	3613.57	0.680186	7884	5509	5487	7900	2080	2593	2367	2810	7512	8048	7494	6789	4592	5246	3033	5098	5277.62
1998	unknown2255	0.000171384	0.00241724	18	15	6614.1	0.125338	0.963963	20	12	17463	0.000252365	0.00401742	19	13.6167	12239	7543.38	0.61634	15641	10422	10936	16449	5685	6175	4290	8182	18635	17114	17268	16835	11955	14255	6837	13976	12165.9
1999	unknown2256	0.00164724	0.00965163	18	15	12652.4	0.311749	1	20	12	35853.2	0.00440308	0.0220409	19	13.6167	26140.7	14932.1	0.57122	36976	26674	21910	34796	12855	18353	9841	16537	38708	31938	39020	33747	22475	27335	14753	30020	25996.1
2001	unknown2258	0.000320124	0.00340574	18	15	2969.49	0.197245	1	20	12	8176.25	0.000673741	0.00658533	19	13.6167	5922.25	3420.42	0.577554	8343	6027	5213	7253	3050	3665	2228	3728	7262	8530	8972	7941	5397	5994	3589	7034	5889.12
2002	unknown2259	8.77e-05	0.00171035	18	15	240279	0.265148	1	20	12	570051	0.000271318	0.00413665	19	13.6167	377906	277379	0.733989	523028	362910	305885	571083	164378	202371	122374	218168	544864	581520	642107	511712	284079	338863	223478	406702	375220
2004	unknown2260	8.77e-05	0.00171035	18	15	28149	0.330128	1	20	12	70192.5	0.000331465	0.00445769	19	13.6167	48988.8	32846.4	0.670487	69576	54942	41378	69473	21948	27491	18818	28209	64445	73177	80661	62487	37915	44841	29081	54289	48670.7
2006	unknown2262	0.000171384	0.00241724	18	15	2536.22	0.182651	0.993547	20	12	6068.75	0.000355976	0.00464887	19	13.6167	3901.63	2962.46	0.759289	5875	3507	3020	5009	1617	1982	1325	2217	5818	6273	7007	5177	3302	3920	2259	3659	3872.94
2007	unknown2263	0.000572095	0.00471842	18	15	3297.59	0.32147	1	20	12	8139.5	0.00176574	0.0118354	19	13.6167	5562.64	3963.9	0.712593	7894	6503	4622	7854	2234	2834	2019	3181	8969	7637	9159	6793	4626	5941	2830	5292	5524.25
2008	unknown2264	0.000171384	0.00241724	18	15	3621.62	0.264753	1	20	12	8514.75	0.000499145	0.00562838	19	13.6167	5818.42	4277.16	0.735106	9083	6498	4926	7884	2252	2885	1777	2738	7938	8480	10649	6992	4945	5142	4011	6232	5777
2009	unknown2265	0.00980952	0.0347873	18	15	4637.91	0.706364	1	20	12	15621	0.0413807	0.12636	19	13.6167	12004.9	5804.31	0.483495	15075	11093	8690	20421	8306	7427	5235	8504	14841	13381	20856	13406	11922	10479	7749	13794	11948.7
2011	unknown2267	0.000320124	0.00340574	18	15	78398.3	0.398083	1	20	12	172721	0.00127027	0.0096496	19	13.6167	111642	93605.6	0.838446	167984	113660	88157	187021	35774	48769	30565	52059	151052	185463	217337	137031	76700	97366	63477	119349	110735
2012	unknown2268	0.000171384	0.00241724	18	15	61751.3	0.322891	1	20	12	140024	0.000597767	0.00623491	19	13.6167	84743.5	75120	0.886439	124498	74154	60818	136192	33096	41160	23424	42692	122013	152029	167217	118838	54871	68286	43031	81939	84016.1
2015	unknown2270	0.000572095	0.00471842	18	15	4533.97	0.266774	1	20	12	10536.8	0.00149378	0.0107087	19	13.6167	6588.56	5324.59	0.808156	10427	6129	4621	8603	2575	3873	1943	3493	10289	10414	12461	8983	4258	6689	3350	6484	6537
2020	unknown2275	0.00164724	0.00965163	18	15	7662.74	0.346048	1	20	12	20987.8	0.00482801	0.0236753	19	13.6167	13897.1	9619.03	0.692161	18009	12443	9579	21676	6645	8482	5249	8570	17715	23746	25765	16725	9968	13882	8285	14124	13803.9
2021	unknown2276	0.00164724	0.00965163	18	6	2668.27	0.46782	1	20	5.99997	9314	0.00629462	0.0292757	19	6.01665	7012.37	2329.69	0.332226	7143	4965	4216	6516	9645	10886	8632	8093	4474	4589	5086	3547	10360	7638	5484	6407	6730.06
2022	unknown2277	0.000171384	0.00241724	18	15	3397.47	0.166661	0.980144	20	12	7750.75	0.00032743	0.00445769	19	13.6167	4901.02	3932.37	0.802357	7206	4021	3482	6970	1512	2465	1470	2276	8089	7727	9082	6105	3878	5369	2800	5355	4862.94
2023	unknown2278	0.000171384	0.00241724	18	15	38344.1	0.310523	1	20	12	77784	0.00057695	0.00609924	19	13.6167	45369.7	45851.1	1.01061	68901	37080	32627	81389	10999	15276	7984	17274	70421	84788	95709	60218	27018	41078	22942	45107	44925.7
2024	unknown2279	0.0065055	0.0255615	18	15	3010.51	0.817031	1	20	12	8573	0.0331518	0.106847	19	13.6167	6688.33	3448.31	0.51557	8389	9792	5357	10115	4157	4599	3021	4338	7858	8794	10336	7304	5687	6637	3765	6330	6654.94
2027	unknown2281	0.0299489	0.0829149	18	15	1013.99	0.647602	1	20	12	6137.5	0.0958644	0.251267	19	13.6167	5103.91	1352.03	0.2649	5888	4748	4250	6470	4003	4617	3919	4596	5887	6362	6789	5512	4520	4786	3852	5254	5090.81
2032	unknown2286	0.0419656	0.10784	18	15	34316.6	0.854565	1	20	12	121712	0.155215	0.363767	19	13.6167	84739.8	48106.7	0.567699	94674	34072	60019	172793	38536	54630	48888	69445	96396	118680	179913	91858	76868	66959	64275	80377	84273.9
2038	unknown2291	0.000171384	0.00241724	18	15	2836.91	0.255158	1	20	12	6226.25	0.000482669	0.005516	19	13.6167	4125.57	3066.6	0.743315	6573	3083	3171	6115	1313	2206	1407	2052	6129	7098	6657	5021	3040	4005	2772	4892	4095.88
2039	unknown2292	0.0419656	0.10784	18	15	12028.4	0.863717	1	20	12	38710.5	0.156491	0.365877	19	13.6167	25884.6	16643.1	0.642975	29811	12869	24136	49961	11836	14996	14134	25160	29557	45150	50962	29173	19966	18826	13900	21137	25723.4
2041	unknown2294	0.000171384	0.00241724	18	15	17848.4	0.352765	1	20	12	34976	0.000647724	0.00647724	19	13.6167	20493	21153.1	1.03221	30749	15699	15001	40048	4104	5870	3086	6291	31322	43573	40814	24195	12361	18261	10901	22336	20288.2
2044	unknown2297	0.00267199	0.0134688	18	12	1708.19	0.0220149	0.9295	23.9024	12	9574.5	0.000631822	0.00640898	20.9512	12.2429	7411.93	3198.19	0.431492	5668	5954	3469	5114	9752	10593	7317	8586	8887	9010	10970	9431	5145	4983	3996	5655	7158.12
2045	unknown2298	0.0299489	0.0829149	18	15	1697.41	0.747625	1	20	12	6445.5	0.107455	0.27434	19	13.6167	5255.04	1856.75	0.353328	6546	3766	4782	8093	3200	3989	3400	4654	6392	6509	7283	5598	4450	5012	4098	6021	5237.06
2050	unknown2301	0.0299489	0.0829149	24	15	1495.53	0.0269937	0.9295	20	12	8787.25	0.0065648	0.03024	22	13.475	5150.05	4800.76	0.932177	3703	4728	3516	2645	3296	3772	3243	4085	10136	7479	9040	8494	2410	3807	4859	5122	5020.94
2053	unknown2304	0.0419656	0.10784	18	15	1542.02	0.637997	1	20	12	5549.75	0.123704	0.308726	19	13.6167	4252.54	1817.98	0.427505	5036	2117	4260	6717	2815	3063	2284	3340	4707	5858	6762	4872	4268	4238	2665	4757	4234.94
2058	unknown2309	8.77e-05	0.00171035	18	12	4729.48	0.0157753	0.9295	22.6735	12	13512.5	2e-05	0.00129551	20.3368	12.1606	7948.65	7111.34	0.89466	4051	3428	2636	2820	8638	10829	7379	10993	13811	12482	16055	11702	2559	2949	3062	3106	7281.25
2068	unknown2318	0.0144977	0.0475569	18	6	2930.25	0.148891	0.966499	20	6	6745.5	0.0154086	0.0588264	19	6.01667	4088.78	3041.73	0.743921	1910	928	1507	2147	6997	6703	6327	6955	2677	2804	2928	2818	4023	3647	4063	3089	3720.19
2072	unknown2321	0.0419656	0.10784	18	3	489.495	0.714622	1	20	6.63e-05	1813	0.13516	0.329158	19	1.58336	1664.3	736.404	0.442471	2160	1625	1538	1929	3072	932	1550	1652	643	1692	933	794	2129	3045	2104	2829	1789.19
2079	unknown2328	0.0065055	0.0255615	18	9	3447.15	0.135966	0.965964	20	6.00001	13945	0.00710316	0.0319053	19	7.60001	8215.11	4441.87	0.540695	3590	1307	3307	4158	15645	14389	12277	13469	4409	4822	6154	5593	7554	5783	8909	6105	7341.94
2083	unknown2331	0.00267199	0.0134688	24	21	13954.9	0.0861316	0.9295	24.2975	17.9999	37869.1	0.00215801	0.0135817	24.1488	19.5099	24681.6	14740.1	0.59721	37227	44978	15057	26159	19514	14165	8709	9139	19308	9284	20567	17832	39007	45415	26304	40751	24588.5
2084	unknown2332	7.77e-06	0.000473861	18	3	2139.71	0.0570074	0.9295	25.5652	5.04e-05	9380.99	6.92e-06	0.0008102	21.7826	1.81524	8487.11	6024.61	0.709854	11769	8612	7983	9160	5747	8212	5598	7075	4778	4656	6111	3687	15409	13687	12523	15572	8786.19
2085	unknown2333	0.00980952	0.0347873	18	6	2583.77	0.788703	1	20	5.99997	6414.75	0.0453513	0.136654	19	6.01665	4370.23	2145.9	0.491026	5050	1660	1489	3307	6546	7784	4678	6651	1911	1764	2017	866	8243	5689	2795	5313	4110.19
2090	unknown2338	0.00421867	0.0189687	18	6	2532.5	0.126035	0.963963	20	6	10589.2	0.0045404	0.0225976	19	6.01667	6259.84	4582.25	0.732007	4335	3161	2972	3431	9986	14075	6591	11705	3671	4015	3891	3128	5834	5695	3830	4953	5704.56
2095	unknown2342	0.0065055	0.0255615	18	15	1249.1	0.114153	0.946907	20	12	9131.5	0.00609347	0.028685	19	13.6167	7951.98	1579.06	0.198574	9084	7512	7443	7773	5873	6953	6979	6616	10412	8501	8921	8692	8180	8758	7253	8037	7936.69
2096	unknown2343	8.77e-05	0.00171035	18	3	100883	0.110969	0.946907	24.7059	5.03e-05	303587	0.000122027	0.00284074	21.3529	1.77943	248732	232755	0.935765	398783	420778	168433	226354	216874	250673	205522	160481	85701	96623	103846	72187	486665	496912	383618	446956	263775
2097	unknown2344	0.000171384	0.00241724	18	3	6114.71	0.113224	0.946907	25.4179	6.12e-05	20161.7	0.000229947	0.00387044	21.7089	1.8091	17328.4	17202.2	0.992717	27923	28236	10791	13697	15558	16509	7829	11612	7386	6333	7631	4601	39596	33066	26295	34529	18224.5
2099	unknown2346	0.000171384	0.00241724	18	3	134436	0.133468	0.964981	20	6.56e-05	355545	0.000267298	0.00410426	19	1.58336	273349	227802	0.833376	478444	477752	205704	260281	274273	312984	258607	203106	94661	101479	107351	69323	584496	570049	447357	545851	311982
2100	unknown2347	0.000572095	0.00471842	18	3	8500.13	0.188372	0.994309	25.2722	6.63e-05	22644.2	0.00109227	0.00882377	21.6361	1.80304	19927.3	20548.1	1.03115	32930	30960	11797	14890	17993	20646	16137	14490	6063	6598	7452	4798	46418	36427	30932	38245	21048.5
2101	unknown2348	0.000572095	0.00471842	18	3	2658.72	0.229949	1	24.5682	6.63e-05	6600.24	0.00130712	0.00987754	21.2841	1.77371	5491.35	5634.06	1.02599	9787	8844	3372	4398	5221	6595	4483	3260	1603	1663	1581	1341	12799	12178	7181	9612	5869.88
2105	unknown2351	0.0210199	0.0632056	18	6	2541.7	0.149579	0.966499	20	5.99999	9194.5	0.0212613	0.0753384	19	6.01666	6213.54	3258.38	0.5244	4295	3511	3260	4789	10056	10840	6980	8902	3958	5165	5126	4235	6655	5690	4231	5406	5818.69
2108	unknown2354	0.0065055	0.0255615	18	15	1150.99	0.162152	0.980144	20	12	10057.5	0.00828535	0.0358472	19	13.6167	8998.55	1418.84	0.157674	9692	9429	8080	8856	7724	7578	7508	8404	11212	9219	10112	9687	8592	10081	8431	9152	8984.81
2110	unknown2356	0.0299489	0.0829149	24	9	11857.8	0.553716	1	22.1053	6	37669.5	0.0845639	0.227288	23.0526	7.45094	20774.6	15923.2	0.766475	7892	32020	6414	6343	77845	38563	20640	13630	11081	43137	14213	23173	12767	3566	2904	7953	20133.8
2111	unknown2357	0.000171384	0.00241724	18	3	4236.28	0.254428	1	20	4.65e-05	10873.5	0.000481413	0.005516	19	1.58336	9393.74	6555.41	0.697849	14472	14399	6731	7892	10516	12434	10069	7728	3982	3769	4797	2672	18659	18274	14735	16959	10505.5
2113	unknown2359	0.000171384	0.00241724	18	6	3594.58	0.255239	1	20	6	9292.25	0.000482809	0.005516	19	6.01667	5625.86	3951.6	0.7024	3578	3417	2225	2369	10411	10587	8865	7306	2220	2617	3536	2354	7506	5348	4360	5653	5147
2115	unknown2360	0.00421867	0.0189687	18	6	3092.18	0.512108	1	20	6	9549.75	0.0154199	0.0588264	19	6.01667	7263.96	2174.09	0.299299	7716	9058	3777	4618	10982	11254	8924	7039	3387	3749	4737	2721	10621	8850	6376	8199	7000.5
2116	unknown2361	0.000572095	0.00471842	18	3	24532.7	0.316218	1	20	6.63e-05	54517	0.00173987	0.0117347	19	1.58336	48446.8	35977.3	0.742615	78687	70860	29169	39352	54059	60484	55728	42730	19743	18986	22301	10547	98648	96834	77142	97504	54548.4
2117	unknown2362	0.000987235	0.00692825	18	3	17806	0.467079	1	20	6	31247.5	0.00400335	0.0206453	19	4.43333	30540.4	19197.4	0.628592	44211	35501	13847	18715	33112	36304	33066	22508	7767	7113	9102	4011	65924	57557	41903	53916	30284.8
2120	unknown2365	0.0210199	0.0632056	18	6	5075.61	0.268171	1	20	6.00001	15315.8	0.0348272	0.111047	19	6.01667	12421.7	2298.48	0.185037	14246	15639	8413	10599	15467	18670	14046	13080	3755	4344	5323	4003	22285	17443	12477	14501	12143.2
2122	unknown2367	0.000171384	0.00241724	18	6	1.54094e+06	0.500216	1	20	5.99997	4.35157e+06	0.000888523	0.00783196	19	6.01665	3.0153e+06	1.38003e+06	0.457675	2946574	2630176	1335925	1641051	4777112	5063581	4411041	3154528	1250957	1530198	1679397	977100	4318426	3570091	2672637	3610338	2.84807e+06
2123	unknown2368	0.000572095	0.00471842	18	6	14211.4	0.42748	1	20	6	40293.8	0.00227833	0.0142149	19	6.01667	27916.8	12881.8	0.461434	26011	25758	12121	15194	41510	44417	43709	31539	14374	18378	17615	8073	33220	31464	22785	35525	26355.8
2124	unknown2369	0.000320124	0.00340574	18	6	7362.04	0.60158	1	20	6.00001	22194.2	0.00184011	0.0120817	19	6.01667	12206.3	10501.3	0.86032	8677	7758	1956	2739	25039	29605	24653	9480	1690	2059	1842	805	25547	14613	6867	11610	10933.8
2126	unknown2370	0.000572095	0.00471842	18	6	76880.2	0.585009	1	20	6.00001	196488	0.0030129	0.0169868	19	6.01667	134065	63828.4	0.476099	141955	118346	52811	61446	205042	246835	197892	136184	45851	54164	56812	27517	216252	174232	120215	165734	126330
2127	unknown2371	0.00164724	0.00965163	18	6	144700	0.582511	1	20	6	405395	0.00762742	0.0336737	19	6.01667	295540	113501	0.384046	313457	289918	126873	158675	411855	458713	411926	339087	171611	165896	181051	92785	392260	351691	261733	381044	281786
2129	unknown2373	0.00344533	0.0173066	18	3	2440.93	0.672582	1	20	6	7441.75	0.016377	0.0615558	19	4.43333	7058.41	2979.41	0.422107	9384	8442	3332	5274	7862	7975	7243	6687	3477	3572	5274	2172	8663	10445	9406	13092	7018.75
2130	unknown2374	0.00164724	0.00965163	18	3	26954.9	0.557271	1	20	6.00001	70916.5	0.00733759	0.0326534	19	4.43334	64821.3	33523.6	0.51717	82193	68838	37618	46632	79378	79833	74505	49950	25249	30672	36523	19069	106713	98433	86864	107530	64375
2131	unknown2375	0.000171384	0.00241724	18	6	144936	0.632387	1	20	5.99998	364982	0.00109789	0.00883614	19	6.01666	247468	123363	0.4985	217414	217094	102826	113158	423008	313635	428317	294970	74465	116898	146994	50905	421415	250447	296024	252736	232519
2133	unknown2377	0.000320124	0.00340574	18	6	13968.5	0.577005	1	20	6	39626.2	0.00177264	0.011846	19	6.01667	28370.1	11853.3	0.41781	28554	23544	13775	15417	45151	43269	37604	32481	13096	17820	21513	8749	35126	29461	26647	38733	26933.8
2134	unknown2378	0.000320124	0.00340574	18	6	76539	0.601043	1	20	6.00001	188579	0.00183863	0.0120817	19	6.01667	132512	58080.3	0.438302	138857	112003	54191	66972	189335	225449	187114	152419	45686	57379	69204	27542	200791	181221	138884	160535	125474
2137	unknown2380	0.00164724	0.00965163	18	6	140023	0.799313	1	20	5.99998	415807	0.0100496	0.0418065	19	6.01666	311274	111738	0.358968	323396	267623	144449	171682	459505	482590	365378	355754	150277	175876	235333	99377	436531	355840	298423	441710	297734
2138	unknown2381	0.000320124	0.00340574	18	6	1.62446e+06	0.555894	1	20	6.00001	4378834	0.00171442	0.0116835	19	6.01667	3.05055e+06	1.38161e+06	0.452905	2963744	2441440	1450311	1669513	4712350	5321604	4202593	3278789	1153536	1484270	1719774	929899	4523730	3748857	2898945	3630636	2.88312e+06
2139	unknown2382	0.000320124	0.00340574	18	6	112862	0.651398	1	20	5.99998	327884	0.0019759	0.0127696	19	6.01666	231258	100096	0.432831	240585	178211	111574	127407	361485	419853	284875	245324	91177	101064	138286	57057	337138	328763	200110	283140	219128
2140	unknown2383	8.77e-05	0.00171035	18	6	4649.23	0.549718	1	20	5.99999	12442.2	0.000527363	0.00582521	19	6.01666	8689.92	3858.82	0.444056	8727	6787	4384	5064	13726	14745	11604	9694	3084	4438	4983	2542	13717	11371	7272	9419	8222.31
2142	unknown2385	0.000320124	0.00340574	18	6	11462.2	0.546389	1	20	6	31088.5	0.00168812	0.0115841	19	6.01667	21027.3	10565.4	0.502459	19672	15579	8732	11451	35881	35365	30311	22797	7508	9578	11706	6586	32214	24487	19237	24848	19747
2143	unknown2386	0.000171384	0.00241724	18	6	6012.18	0.276885	1	20	6.00002	14822.5	0.000519892	0.00578406	19	6.01668	8965.15	5955.16	0.664257	7367	5447	3164	6740	11659	18474	12893	16264	2309	3208	5070	1960	7228	15029	8593	6491	8243.5
2144	unknown2387	0.000572095	0.00471842	18	6	10757.2	0.643947	1	20	5.99999	32471	0.00328109	0.0180004	19	6.01666	24388.5	8390.16	0.344021	26756	21405	13139	13803	34217	36417	27985	31265	13743	12561	20248	6982	31462	28318	24197	31451	23371.8
2145	unknown2388	0.00267199	0.0134688	18	6	2717.41	0.87751	1	20	6	9808.75	0.0165433	0.062127	19	6.01667	7464.78	2646.64	0.35455	6511	6588	3565	4302	11657	10779	7654	9145	5282	5506	6956	3154	8754	6953	7573	9926	7144.06
2146	unknown2389	0.00980952	0.0347873	18	6	5983.54	0.763712	1	20	6	15834.5	0.0441555	0.133702	19	6.01667	12676.6	3382.41	0.266824	13119	10081	6896	8095	15919	17665	17110	12644	4702	4743	6659	3139	18779	18273	16960	21483	12266.7
2149	unknown2391	0.000572095	0.00471842	18	6	191582	0.504504	1	20	6.00001	626054	0.00264102	0.0156011	19	6.01667	454717	180635	0.397248	460294	359275	252196	268962	629624	790787	560080	523724	283771	278881	363444	188969	508301	502143	402280	552508	432827
2150	unknown2392	0.00267199	0.0134688	18	6	23084.2	0.817842	1	20	6	73635.8	0.0155723	0.0591992	19	6.01667	55608.7	19745.8	0.355085	52568	44383	30814	33853	82019	76983	55774	79767	34880	33217	59242	20206	65444	55385	53131	73788	53215.9
2151	unknown2393	0.000171384	0.00241724	18	6	11539.5	0.609123	1	20	6	31889.8	0.00106141	0.00870436	19	6.01667	17972.7	14772.6	0.821945	15276	8439	3361	3566	37663	41583	31340	16973	1613	2503	3643	673	34011	24003	13991	20283	16182.6
2152	unknown2394	0.000320124	0.00340574	18	6	4449.12	0.620439	1	20	6	12621.5	0.00189166	0.0123543	19	6.01667	9519.69	3222.47	0.338506	9812	7926	5462	5805	13620	13716	11204	11946	4310	4651	6852	2738	12060	12013	10642	13310	9129.19
2153	unknown2395	0.000320124	0.00340574	18	6	49490.9	0.57706	1	20	6.00002	129488	0.00177279	0.011846	19	6.01667	92493.4	38362.2	0.414756	97843	70320	49057	48557	132562	151230	127222	106939	36823	43226	52477	23433	136163	116804	94361	118498	87844.7
2154	unknown2396	0.00421867	0.0189687	18	3	3278.85	0.717359	1	20	6	9105.25	0.0205801	0.0735853	19	4.43333	8986.22	4744.14	0.527936	12271	5787	5349	8252	11558	10977	6493	7393	4215	3130	3946	2257	20138	15838	9223	15942	8923.06
2155	unknown2397	1.91e-05	0.000802606	24	21	3494.34	0.0305625	0.9295	25.5652	17.9999	13402.2	8.96e-06	0.000967577	24.7826	19.5668	7976.77	4612.55	0.578248	9377	8736	7890	7446	3985	4861	4749	4497	5680	4881	5878	3667	15645	12790	9686	15488	7828.5
2156	unknown2398	0.000171384	0.00241724	18	6	31808.1	0.720411	1	20	6	93418.2	0.00123461	0.00951224	19	6.01667	53767.4	42263.1	0.786035	46966	25275	11205	9853	88146	137055	104794	43678	6093	6310	8773	1835	101031	74828	44178	68315	48645.9
2157	unknown2399	0.00267199	0.0134688	18	6	139411	0.514863	1	20	6	341358	0.01044	0.0430525	19	6.01667	255095	85308.4	0.334418	313232	216848	134166	149529	368371	362765	349043	285251	94742	105272	137589	48148	370378	329733	286957	364100	244758
2160	unknown2400	8.77e-05	0.00171035	18	6	16511.7	0.566287	1	20	6.00001	46293.8	0.000541783	0.00593904	19	6.01667	33989.5	12665	0.372615	35870	26828	19832	20305	49378	52874	45422	37501	13744	19664	22477	10232	43135	36066	36149	49799	32454.8
2161	unknown2401	0.000171384	0.00241724	18	6	17770.8	0.613543	1	20	6.00001	42804.2	0.00106835	0.00871641	19	6.01667	26550.6	16948	0.638328	28766	16528	8135	6927	45800	55932	43034	26451	4774	6232	7284	1657	45115	37427	25484	32404	24496.9
2162	unknown2402	0.000320124	0.00340574	18	6	219447	0.600105	1	20	6.00001	635227	0.00183607	0.0120817	19	6.01667	474870	165382	0.348269	517373	403956	274592	259040	624711	736164	616623	563410	225037	263024	315691	133600	615809	550236	512084	665911	454829
2164	unknown2404	0.0065055	0.0255615	18	6	8239.56	0.220682	1	20	6.00002	24679.2	0.0108336	0.0443377	19	6.01667	19510.8	4301.04	0.220444	24091	20561	14940	15066	26489	28745	22250	21233	5480	5855	7744	6188	32945	26891	21308	24047	18989.6
2167	unknown2407	0.000171384	0.00241724	18	6	8884.8	0.631475	1	20	5.99997	25971	0.00109646	0.00883614	19	6.01665	18359.6	7976.79	0.434474	18552	12693	9223	10869	26754	29530	28712	18888	7525	9775	9800	5512	28293	21820	16583	23759	17393
2168	unknown2408	0.000572095	0.00471842	18	6	5442.95	0.689196	1	20	6	16005	0.00348487	0.018768	19	6.01667	11888.4	4699.48	0.395299	9234	6865	7203	8102	16624	16889	15472	15035	7120	9149	9800	6923	14843	14406	10362	13076	11318.9
2169	unknown2409	0.00980952	0.0347873	18	6	197.283	0.714109	1	20	6	643.25	0.0417581	0.127243	19	6.01667	471.475	191.14	0.405409	451	226	279	324	627	787	601	558	336	369	291	273	638	592	384	437	448.312
2172	unknown2411	0.000987235	0.00692825	18	6	12007.9	0.744855	1	20	5.99999	30171.2	0.006041	0.028494	19	6.01666	20175.8	10460.3	0.518461	21137	14531	6994	8746	38057	37551	27006	18071	5675	5871	8797	3745	36173	28548	19057	22572	18908.2
2173	unknown2412	0.000572095	0.00471842	18	6	250298	0.613499	1	20	6	782506	0.00314294	0.017461	19	6.01667	547104	249221	0.455527	528021	416074	257826	293857	912211	930266	753886	533663	251120	303053	347255	188158	766989	655419	518539	614121	516904
2174	unknown2413	0.000572095	0.00471842	18	6	25729.5	0.625545	1	20	6.00001	73846.2	0.0031977	0.0177045	19	6.01667	49979.7	24751.3	0.495228	52321	38266	20963	23443	87909	94176	65653	47647	18639	20263	25428	12084	78653	60762	48140	57338	46980.3
2175	unknown2414	0.00980952	0.0347873	18	3	15900.9	0.830045	1	20	6	48417.2	0.0473125	0.141578	19	4.43333	40485.9	27166.1	0.671001	46950	27915	22360	26732	51302	54059	54179	34129	13444	17079	19559	10361	71933	68331	55573	68083	40124.3
2176	unknown2415	8.77e-05	0.00171035	18	3	4686	0.0538192	0.9295	23.2718	5.67e-05	15061.7	6.26e-05	0.00208985	20.6359	1.71968	11070.2	8814.6	0.796243	17843	18904	9790	13710	9566	10832	9148	8060	4366	4699	5104	4044	18547	22783	15953	16913	11891.4
2177	unknown2416	0.000171384	0.00241724	18	3	4386.54	0.0927944	0.93685	20	4.17e-05	11479.7	0.000191621	0.00356102	19	1.58335	7718.61	6840.66	0.886255	14757	16168	6171	8823	7832	8683	5902	5823	2391	2008	2708	1909	18351	15741	11133	13660	8878.75
2178	unknown2417	1.91e-05	0.000802606	18	3	6308.81	0.0321388	0.9295	23.6461	6.63e-05	21806.9	9.39e-06	0.000967577	20.8231	1.73528	15321.6	12684.1	0.827862	26622	26787	14783	19036	12605	13523	10767	10526	5996	6210	6975	5726	29259	27537	22132	23976	16403.8
2179	unknown2418	0.000171384	0.00241724	18	6	63836.7	0.784916	1	20	5.99998	163875	0.00133362	0.010008	19	6.01666	115722	52249.5	0.45151	113743	59684	55356	65389	149963	187593	185046	132897	41590	49689	59319	29752	174636	152333	119286	173967	109390
2180	unknown2419	0.00421867	0.0189687	18	6	6812.97	0.825569	1	20	6	16348.2	0.0231952	0.0805414	19	6.01667	12041.9	4600.36	0.382029	13457	7386	5594	6735	15742	19221	17339	13091	4208	4211	5710	3017	19996	16606	11334	20104	11484.4
2185	unknown2423	0.00980952	0.0347873	18	3	5572.71	0.49756	1	20	6.00002	14314.5	0.0308587	0.10092	19	4.43334	12350.3	7513.1	0.608332	15936	7467	9861	11350	13449	17301	12902	13606	3705	4337	5332	4172	23919	19100	16446	17122	12250.3
2188	unknown2426	8.77e-05	0.00171035	18	3	108951	0.0477093	0.9295	23.52	6.16e-05	334066	5.6e-05	0.00198737	20.76	1.73003	236770	209708	0.885701	404799	442570	205409	283489	204638	230687	161385	165382	80913	85850	97429	72302	468361	432919	351345	395876	255210
2189	unknown2427	7.77e-06	0.000473861	18	3	2703.27	0.042768	0.9295	23.7736	5.57e-05	8861.73	5.29e-06	0.000715724	20.8868	1.74059	6582.39	5292.44	0.804029	9918	11594	6243	7692	5540	6570	4689	4641	2491	3050	3298	2349	11735	12321	9985	10206	7020.12
2191	unknown2429	4.22e-05	0.00116331	18	3	2800.14	0.0853827	0.9295	24.0327	6.17e-05	7303.98	4.87e-05	0.00181386	21.0163	1.75139	5365.13	5401.19	1.00672	9127	10196	3869	6024	4085	5495	3688	3701	1924	1487	1583	1206	12313	10675	7216	9951	5783.75
2193	unknown2430	8.77e-05	0.00171035	18	3	4868.43	0.0474702	0.9295	23.2718	7.85e-05	16354.7	5.57e-05	0.00198737	20.6359	1.71969	11854.9	9373.33	0.790669	19062	21475	10694	14188	10816	11501	8448	9041	4908	5123	5337	4324	21741	21244	16548	19200	12728.1
2194	unknown2431	0.00980952	0.0347873	18	15	3678.72	0.27388	1	20	12	14989.5	0.0185901	0.067871	19	13.6167	11554.1	4530.17	0.392082	15019	10494	9537	11485	7865	8457	6391	8923	17927	13845	18248	9938	10691	13248	9212	12884	11510.2
2199	unknown2436	0.000171384	0.00241724	18	3	4649.23	0.0700347	0.9295	20	4.37e-05	13653.5	0.000147999	0.00316458	19	1.58335	9892.17	6770.28	0.684408	16361	17907	9001	11345	9453	11835	7448	8499	4235	4809	4755	3974	18533	18303	14134	16054	11040.4
2201	unknown2438	1.91e-05	0.000802606	18	3	5880.83	0.04817	0.9295	20	7.21e-05	18737.2	1.37e-05	0.00108038	19	1.58337	13553.8	9244.29	0.682045	22455	22768	13065	16661	13353	14517	9768	11894	6226	6524	7441	4976	24214	24376	20528	23179	15121.6
2202	unknown2439	1.91e-05	0.000802606	18	3	128466	0.0527853	0.9295	20	7.55e-05	378457	1.49e-05	0.00108038	19	1.58337	267444	206734	0.772999	476421	461342	253570	322499	261352	288761	189544	227214	105277	108888	126388	81988	511024	515003	428728	482079	302505
2204	unknown2440	8.77e-05	0.00171035	18	3	6733.42	0.0654432	0.9295	23.52	6.77e-05	22379.7	7.5e-05	0.00228682	20.76	1.73003	17005.9	13057.5	0.767822	26291	29918	14833	18477	16367	16631	12457	12928	7700	7612	8451	6093	28897	31643	23362	28805	18154.1
2205	unknown2441	0.00421867	0.0189687	18	6	261725	0.907095	1	20	5.99997	642098	0.0251253	0.0859342	19	6.01665	470682	190330	0.40437	515925	186521	227420	266845	662351	741392	692237	472410	152035	217254	240149	112942	776311	679530	527555	691017	447618
2206	unknown2442	0.000320124	0.00340574	18	3	2633.97	0.0648475	0.9295	24.5682	6.63e-05	10228	0.000244596	0.00393718	21.2841	1.77371	7929.82	6669.93	0.84112	12870	13677	6019	8346	6555	7190	3907	5924	4020	3068	4666	2249	14940	16029	11762	12825	8377.94
2207	unknown2443	0.0210199	0.0632056	18	6	10909.1	0.986285	1	20	5.99999	26635.5	0.101089	0.261635	19	6.01666	20757.5	6930.51	0.333879	22380	8354	10878	11468	26167	28620	25805	25950	8897	10219	13061	6281	39566	26266	22095	32676	19917.7
2208	unknown2444	0.00980952	0.0347873	18	6	12997	0.890919	1	20	6	28446.5	0.0501638	0.148064	19	6.01667	21780.8	7299.31	0.335125	28080	8818	9216	12542	32384	34455	26109	20838	4358	6671	7476	3389	44422	37895	26468	31220	20896.3
2209	unknown2445	0.000987235	0.00692825	18	3	4658.07	0.204995	1	20	6.63e-05	9997.24	0.00192368	0.0125068	19	1.58336	7529.81	6632.76	0.880867	14140	12917	5494	7438	8756	10322	5885	6966	1642	2028	2309	1567	19154	17316	10415	12126	8654.69
2211	unknown2447	0.0065055	0.0255615	18	6	2611.52	0.243076	1	20	6	10606.8	0.0117801	0.047361	19	6.01667	8873.19	1503.48	0.169441	10343	9631	6670	7574	11173	11511	9460	10283	5230	5698	6103	5219	11976	10415	8230	9540	8691
2213	unknown2449	0.0065055	0.0255615	18	6	681972	0.39308	1	20	6	2.40492e+06	0.0178206	0.0654481	19	6.01667	1.94976e+06	407614	0.209058	2265602	2083172	1280111	1619466	2673284	2801905	2008320	2136186	945885	1004989	1178744	968853	3023436	2475966	1864773	2075181	1.90037e+06
2215	unknown2450	0.00421867	0.0189687	18	6	25358.3	0.287752	1	20	6	92793.5	0.00936412	0.0395963	19	6.01667	76316.3	14327	0.187731	88394	86994	53999	62735	93704	107922	81990	87558	40178	42447	50092	43467	108595	92484	71656	81067	74580.1
2216	unknown2451	0.0065055	0.0255615	18	6	8378.51	0.368282	1	20	6	27642.2	0.0168525	0.0628521	19	6.01667	21949.3	4967.85	0.226333	23209	27710	15598	16648	31746	31147	22471	25205	11119	10885	11988	10199	33994	28969	16575	24094	21347.3
2217	unknown2452	0.00421867	0.0189687	18	6	10789.7	0.221223	1	20	5.99998	44692.8	0.0074445	0.0329935	19	6.01666	38109.3	5356.4	0.140554	46605	40107	27747	36138	43217	47611	39423	48520	21889	21317	26419	20328	52684	47012	39294	41052	37460.2
2218	unknown2453	0.0065055	0.0255615	18	6	25627	0.61772	1	20	6	65281.5	0.0261884	0.0888411	19	6.01667	48225.1	15588.2	0.323238	59207	53629	23675	31420	67932	88091	55520	49583	10452	14543	17395	12222	102593	73976	41497	39643	46336.1
2229	unknown2463	0.00421867	0.0189687	18	15	1149.4	0.0963706	0.945467	20	12	5453.25	0.00358086	0.019095	19	13.6167	3956.35	1610.56	0.407082	4360	2824	3125	4463	2786	3389	2575	3290	5869	5316	6082	4546	3412	4001	3049	3965	3940.75
2230	unknown2464	0.0065055	0.0255615	18	6	1053.59	0.406536	1	20	6	7873.75	0.0183416	0.0670771	19	6.01667	7094.52	701.094	0.0988219	6548	7435	6184	7392	8110	8384	7090	7911	5246	5857	6363	5636	6672	7083	7351	8891	7009.56
2231	unknown2465	0.00421867	0.0189687	18	6	559992	0.385719	1	20	6	1.99535e+06	0.0120754	0.0484135	19	6.01667	1.56518e+06	394750	0.252207	1786790	1670933	970596	1227842	2230882	2465371	1610297	1674831	709387	785309	912110	664685	2268450	2028717	1520902	1750377	1.51734e+06
2232	unknown2466	0.0065055	0.0255615	18	6	8618.57	0.269719	1	20	6	37353.2	0.0128888	0.0510132	19	6.01667	31431.2	5112.08	0.162644	38631	31631	22658	28138	39696	41108	33628	34981	18757	19576	23196	14904	39889	38325	30714	37155	30811.7
2233	unknown2467	0.00164724	0.00965163	18	6	2067.58	0.379471	1	20	6	8314.75	0.0052367	0.0252504	19	6.01667	6806.85	1354.72	0.199022	7674	7525	4708	5625	8635	10170	6358	8096	3693	3869	4718	3874	9184	8113	6126	7915	6642.69
2234	unknown2468	0.0065055	0.0255615	18	6	20076.5	0.379029	1	20	6	73632	0.0172734	0.0640905	19	6.01667	59754.2	12609.5	0.211022	67334	66419	38484	47917	81755	85860	61681	65232	30143	32275	38491	28216	82027	78681	57932	69172	58226.2
2235	unknown2469	0.0144977	0.0475569	18	6	5396.29	0.50338	1	20	6	18288.5	0.0432046	0.131098	19	6.01667	14781.2	3089.16	0.208993	15782	17820	10359	11390	20495	22684	14549	15426	6639	7599	8169	6603	23440	22158	11471	15925	14406.8
2237	unknown2470	0.0210199	0.0632056	18	3	6553.82	0.610114	1	20	6.63e-05	16407.7	0.0686932	0.191281	19	1.58336	12949.6	8255.75	0.637528	23319	21405	11855	9052	15913	20521	9378	11299	5060	6007	5692	5162	37780	18886	14545	13722	14349.8
2238	unknown2471	0.000987235	0.00692825	18	9	4935.61	0.137655	0.965964	20	6	28279.2	0.00134588	0.0100427	19	7.6	21716.3	5893.5	0.271386	16154	12081	15571	21628	24476	29426	24299	34916	17607	16843	22698	22123	16554	16551	17694	20303	20557.8
2239	unknown2472	0.00164724	0.00965163	18	6	3904.29	0.315076	1	20	6	12453.2	0.00444456	0.0221972	19	6.01667	9703.78	2462.52	0.253769	11838	10382	6204	7496	13648	14474	10918	10773	4378	5060	5527	4217	14459	12559	8653	9900	9405.38
2240	unknown2473	0.0299489	0.0829149	24	15	2322.67	0.33491	1	23.3952	12	16457.8	0.0561907	0.161277	23.6976	13.4831	13831	2979.8	0.215444	12595	12160	8258	12423	13327	11087	10133	17088	15461	15527	17052	17791	12681	13970	12833	18660	13815.4
2241	unknown2474	0.0419656	0.10784	24	15	1539.73	0.238223	1	21.995	12	8936	0.0560386	0.161013	22.9975	13.4602	7278.32	1913.23	0.262866	6367	6837	4637	5873	6276	5521	5407	8998	8626	8299	9118	9701	6645	6942	6720	9993	7247.5
2242	unknown2475	0.000320124	0.00340574	18	6	2349.36	0.320742	1	20	5.99997	5883	0.00104566	0.00862418	19	6.01665	3780.68	2119.2	0.560534	3465	2123	2336	2608	6134	6422	4382	6594	1273	1312	2482	880	3270	3146	3446	6509	3523.88
2243	unknown2476	0.00267199	0.0134688	18	6	2123.8	0.139357	0.965964	20	6	4994.75	0.00331239	0.0180866	19	6.01667	3002.78	2171.1	0.72303	1468	779	1533	2170	5067	5640	4794	4478	1720	1633	2070	1487	2733	2982	3129	2152	2739.69
2249	unknown2481	0.0419656	0.10784	18	15	883	0.0786524	0.9295	20	12	5192	0.0221596	0.0777562	19	13.6167	3971.82	1207.25	0.303954	4316	3225	2634	4160	3096	3592	2827	3627	5242	4941	5717	4868	3518	4052	3258	4289	3960.12
2252	unknown2484	0.0210199	0.0632056	18	6	24652.9	0.379882	1	20	6	82025	0.0465544	0.139406	19	6.01667	66691.3	13435.4	0.201456	79321	74763	46254	49643	89927	99505	64265	74403	30627	33079	36940	26533	101894	92190	66440	75227	65063.2
2254	unknown2486	0.0144977	0.0475569	18	6	9199.46	0.598576	1	20	6	22915.5	0.0498721	0.147303	19	6.01667	16876.1	5646.17	0.334567	19461	19111	9299	8787	28459	28729	17298	17176	3705	4227	5740	3424	34347	26303	15597	17407	16191.9
2257	unknown2489	0.0419656	0.10784	18	6	586.368	0.805039	1	20	5.99999	4572.25	0.148236	0.352331	19	6.01666	4025.47	616.601	0.153175	3733	3889	2733	3798	4718	4915	4261	4395	3616	3491	4367	3254	3775	4547	3575	4145	3950.75
2261	unknown2492	0.00980952	0.0347873	18	6	29653.6	0.603716	1	20	6	80396	0.0362973	0.114055	19	6.01667	58809	20233.1	0.344047	68604	65502	28622	33232	99457	110737	54911	56479	13171	14098	18922	10224	112448	92794	54632	67882	56357.2
2262	unknown2493	0.00421867	0.0189687	18	6	758589	0.469232	1	20	6	2.61157e+06	0.0143019	0.0553911	19	6.01667	2.09943e+06	474480	0.226004	2357322	2273815	1375794	1529541	2885108	3206228	2027896	2327051	978946	1061089	1202493	868580	3185027	2784232	2085672	2522130	2.04193e+06
2263	unknown2494	0.00421867	0.0189687	18	6	26587.9	0.509491	1	20	6	95551	0.0153521	0.0586712	19	6.01667	78987.3	15178.5	0.192164	89955	84485	54837	60849	105726	111739	75592	89147	41807	45231	50521	37806	122517	101352	72805	89998	77147.9
2264	unknown2495	0.0065055	0.0255615	18	6	2788.3	0.54501	1	20	6	11507.2	0.0235498	0.081521	19	6.01667	9597.16	1817.84	0.189414	10804	9964	6362	7450	12992	13408	9346	10283	5422	5961	6409	5103	13192	12295	9857	11182	9376.88
2265	unknown2496	0.00421867	0.0189687	18	6	12427	0.500381	1	20	6	51812	0.0151156	0.0579723	19	6.01667	44496.9	6844.6	0.153822	52318	41610	33384	36174	52076	59813	41786	53573	27285	28463	31455	21709	61803	54399	51641	51190	43667.4
2266	unknown2497	0.00421867	0.0189687	18	6	3395.17	0.51618	1	20	6	11234.8	0.0155252	0.0590723	19	6.01667	9103.25	1996.01	0.219263	9320	10153	6256	6634	12233	14119	9658	8929	4125	4275	5213	3911	14608	12169	9538	10641	8861.38
2268	unknown2499	0.0065055	0.0255615	18	6	14358.5	0.643374	1	20	6	46982.5	0.0271057	0.0912656	19	6.01667	37140.1	9744.86	0.262381	38789	41975	24879	19267	46266	61387	38637	41640	19225	18915	22425	16094	50883	50997	39933	44036	35959.2
2277	unknown2506	0.00164724	0.00965163	18	6	3788.32	0.881182	1	20	6	10774.2	0.0109374	0.0446783	19	6.01666	8108.93	2894.39	0.356938	7621	6679	3413	5055	10195	12444	12143	8315	3486	4006	4712	2740	10734	8514	14671	9403	7758.19
2280	unknown2509	0.0299489	0.0829149	18	15	5010.91	0.0716023	0.9295	20	12	22305	0.0153216	0.0586064	19	13.6167	16809.7	6946.17	0.413224	18161	12294	14393	18742	9604	12849	8043	11835	26865	19101	25494	17760	18943	21117	15107	17571	16742.4
2283	unknown2511	0.000171384	0.00241724	18	15	64960.5	0.0519058	0.9295	20	12	202611	0.000112354	0.0027331	19	13.6167	142144	76335.2	0.537028	161380	105055	120372	176466	74826	94145	71084	96219	203129	200861	219405	187050	130376	153103	118295	150708	141405
2284	unknown2512	0.000987235	0.00692825	18	15	4819.64	0.0618248	0.9295	20	12	19186.8	0.000653328	0.00648833	19	13.6167	14372.5	6147.58	0.427733	16462	10606	14068	15644	9120	10994	7429	10353	20911	18376	20519	16941	14343	17187	12262	13792	14312.9
2286	unknown2514	0.0144977	0.0475569	18	9	821.658	0.652907	1	20	6	4546.75	0.0535765	0.155905	19	7.6	3675.61	705.45	0.191927	2946	2503	2192	3095	4884	4966	4561	3776	3081	3085	3624	3127	3949	4462	3268	3072	3536.94
2288	unknown2516	4.22e-05	0.00116331	18	15	14209.7	0.0765936	0.9295	20	12	44423.8	4.41e-05	0.00178364	19	13.6167	31554.3	17022.1	0.539454	37212	26604	26973	38931	16417	20617	15591	21110	44479	41341	50805	41070	26728	35962	25316	33075	31389.4
2289	unknown2517	0.0144977	0.0475569	18	15	1391.23	0.101479	0.946907	20	12	5130.5	0.011066	0.0451182	19	13.6167	3968.99	1676.93	0.422509	4215	3519	3749	4761	2244	2672	1954	2797	6220	4167	5915	4220	4051	5113	3249	4398	3952.75
2295	unknown2522	0.000572095	0.00471842	18	6	11860.3	0.785451	1	20	5.99997	43915.8	0.00391282	0.0203674	19	6.01665	33545.4	10905.8	0.325106	32593	29823	19267	21790	50028	54880	33611	37144	20269	18859	24449	14548	49815	43785	31018	33702	32223.8
2297	unknown2524	0.00980952	0.0347873	18	15	2802.09	0.291404	1	20	12	10643.5	0.0196023	0.0707905	19	13.6167	7796.29	3631.14	0.465753	8619	6394	6293	10315	4277	6372	3991	6007	13972	8503	11376	8723	7238	8930	5536	7632	7761.12
2298	unknown2525	0.0419656	0.10784	18	6	1652.33	0.806438	1	20	6	8044.25	0.148435	0.35237	19	6.01667	6532.34	1853.35	0.283719	5612	4092	3540	5559	9140	8725	7756	6556	4509	5546	6553	6608	7273	6933	6454	6068	6307.75
2299	unknown2526	0.000320124	0.00340574	18	15	5723.68	0.108018	0.946907	20	12	24683	0.000389785	0.00488514	19	13.6167	18510.2	8114.93	0.438403	21102	15923	15243	22508	10996	14426	8566	14317	28340	22497	26229	21666	17288	20476	14757	20572	18431.6
2301	unknown2528	0.00421867	0.0189687	18	15	7470.76	0.215587	1	20	12	25776.2	0.00727833	0.0324828	19	13.6167	19412.9	8770.19	0.45177	21866	16278	15203	26785	10510	14501	9742	13969	32666	21095	26549	22795	17979	23830	14956	20524	19328
2302	unknown2529	0.000987235	0.00692825	18	15	57173.8	0.0933192	0.93685	20	12	198254	0.000948212	0.00819513	19	13.6167	142012	70266.5	0.494792	166077	99271	111830	180918	83230	103380	64619	102890	201228	183565	223947	184276	114467	160802	123163	157643	141332
2304	unknown2530	0.00267199	0.0134688	18	15	35807.4	0.130561	0.964726	20	12	98710.5	0.00312607	0.0174345	19	13.6167	73154.8	36410.6	0.49772	96510	58098	53459	99865	40412	48538	35149	45632	89383	100622	109029	95808	67835	80479	60012	84004	72802.2
2305	unknown2531	0.0065055	0.0255615	18	15	4011.42	0.155718	0.97563	20	12	12246	0.00799765	0.0349443	19	13.6167	9458.69	4292.13	0.453777	11090	9068	6862	13495	4883	6778	4300	6153	13833	10679	12666	11806	8908	11875	7413	10865	9417.12
2307	unknown2533	0.000987235	0.00692825	18	15	3575.84	0.249613	1	20	12	11097	0.00229385	0.0142706	19	13.6167	8496.74	3915.89	0.46087	11199	8702	6493	10750	5159	5901	4182	5808	11503	10774	11598	10513	7386	10272	5240	9861	8458.81
2308	unknown2534	0.00267199	0.0134688	18	15	1630.59	0.107484	0.946907	20	12	5783.75	0.0026294	0.0155537	19	13.6167	4636.64	1660.25	0.358071	5422	4092	3649	6051	2951	3647	2730	3397	5396	5824	6061	5854	4454	5022	4234	5145	4620.56
2311	unknown2537	0.00164724	0.00965163	18	6	4178.29	0.643816	1	20	6	13958.8	0.00832402	0.0359412	19	6.01667	11235.2	2713.1	0.241482	12647	9890	7258	7733	15724	16960	10419	12732	5417	5393	6748	3508	16938	15802	12801	14533	10906.4
2313	unknown2539	0.000987235	0.00692825	18	15	15955.5	0.0825352	0.9295	20	12	46764.2	0.000848642	0.00766885	19	13.6167	34132	17448.2	0.511197	42004	27785	26427	44629	18098	22180	16263	21434	41305	48072	52800	44880	31411	37467	28811	39843	33963.1
2315	unknown2540	0.000572095	0.00471842	18	15	2934.32	0.0491759	0.9295	20	12	9346	0.000322929	0.00445769	19	13.6167	6799.87	3291.3	0.484024	7240	5964	5165	8452	4030	4680	3267	4420	9609	9432	9530	8813	6172	7718	5522	8274	6768
2316	unknown2541	0.000987235	0.00692825	18	15	2055.56	0.0510152	0.9295	20	12	9132.5	0.000548778	0.00596682	19	13.6167	6535.22	2953.03	0.451864	6214	5171	5270	7447	4025	4902	3525	5146	10473	8523	9824	7710	6139	7661	5214	6862	6506.62
2317	unknown2542	0.00164724	0.00965163	18	6	2031.16	0.913732	1	20	6	7449.75	0.0112868	0.0456747	19	6.01667	5802.88	1878.97	0.323799	4770	3803	3350	4681	7969	8384	6087	7359	4220	3549	5679	2925	7076	7246	4860	7245	5575.19
2319	unknown2544	0.000572095	0.00471842	18	15	2439.52	0.0713174	0.9295	20	12	8077.75	0.000453162	0.00534657	19	13.6167	5967.8	2832	0.474547	7166	4924	4724	7377	3662	3817	3019	4022	7213	8738	8956	7404	5441	6189	5319	7075	5940.38
2321	unknown2546	0.00164724	0.00965163	18	6	12352.3	0.67925	1	20	6	36089.8	0.00872221	0.0373193	19	6.01667	27983.5	8328.8	0.297632	32339	21502	15119	19449	39873	40645	31023	32818	12173	15289	16673	9818	42235	38803	31013	32816	26974.2
2326	unknown2550	0.00421867	0.0189687	18	6	10558.9	0.758641	1	20	6	36819.8	0.0215853	0.0762976	19	6.01667	27268.9	10932.6	0.400917	20145	18805	14815	17416	46746	35145	31856	33532	19032	15998	22331	17841	31873	32040	25642	31889	25944.1
2328	unknown2552	0.00164724	0.00965163	18	6	13291.1	0.56511	1	20	6	47584	0.00742779	0.0329532	19	6.01667	34139.9	14932	0.437377	24621	22858	18659	23561	56027	50910	37922	45477	21878	18923	28373	20178	39835	40940	28133	38992	32330.4
2331	unknown2555	0.0299489	0.0829149	24	12	1752.56	0.307193	1	24.0327	12	8761.25	0.0523352	0.152806	24.0163	12	7210.14	2191.08	0.303889	6057	7696	3794	4886	8712	10536	6601	6888	9137	8205	10401	7302	6217	6239	4457	8253	7211.31
2333	unknown2557	0.00980952	0.0347873	24	0	1297.01	0.178861	0.990633	24.0327	6.63e-05	4792.49	0.0128881	0.0510132	24.0163	3.31e-05	3655.21	1685.04	0.460995	5253	7152	3008	3757	3521	3350	2196	2343	2506	2141	2573	2811	4719	5091	3606	4442	3654.31
2338	unknown2561	0.000171384	0.00241724	18	0	4511.34	0.01487	0.9295	23.9024	17.9999	11849	3.54e-05	0.00161226	20.9512	18.3644	7355.05	5697.83	0.774683	14516	14815	9033	12429	2256	2963	3583	4423	5515	2971	4819	5101	12515	12301	10962	11618	8113.75
2340	unknown2563	0.0419656	0.10784	24	12	2244.36	0.254687	1	21.5648	12	10843	0.0591974	0.168635	22.7824	12.0344	8534.47	2901.17	0.339936	7550	9040	4997	5788	10242	11450	6783	7729	10788	11294	11826	9464	6843	6379	4868	9746	8424.19
2347	unknown257	0.00267199	0.0134688	18	6	3457.05	0.284981	1	20	5.99999	9637	0.00622901	0.029127	19	6.01666	5783.75	4253.49	0.735421	4116	301	2687	3576	10989	12124	7039	8396	3038	4178	3438	2754	6733	5302	4111	5511	5268.31
2349	unknown2571	0.00980952	0.0347873	24	21	1066.67	0.0833476	0.9295	24.0327	17.9999	2756.24	0.00663003	0.0304433	24.0163	19.501	2082.49	1155.27	0.554754	2658	4511	1848	2808	1903	1461	1080	748	1137	1074	1313	1741	2959	2844	2848	2374	2081.69
2355	unknown2577	0.000572095	0.00471842	24	12	7386.44	0.0118269	0.9295	23.7736	12	18152.8	8.73e-05	0.00242333	23.8868	12.0003	11893.9	9045.89	0.760548	7257	8331	4425	6673	17172	17420	13671	14814	17359	17795	19977	17480	7179	6658	4776	8781	11860.5
2358	unknown258	0.00980952	0.0347873	18	6	1744.96	0.556461	1	20	5.99997	9655.5	0.0339011	0.108493	19	6.01665	8030.64	1639.24	0.204123	7992	6095	6988	7486	9695	10985	7381	10561	5375	6355	7642	5692	9271	7872	6762	9160	7832
2361	unknown2582	0.0065055	0.0255615	24	21	1059.25	0.133574	0.964981	23.9024	17.9999	3903.24	0.00699362	0.0315442	23.9512	19.497	3164.94	1252.77	0.395825	4125	5860	2948	3431	2902	2645	1481	1819	2463	2070	2447	2877	3370	4261	3518	4464	3167.56
2365	unknown2586	0.0144977	0.0475569	18	0	2969.14	0.454094	1	20	17.9999	22938.5	0.0396528	0.121944	19	18.05	21715.3	2404.7	0.110738	24980	27345	22849	24840	21538	21774	16299	17442	18547	21984	23596	22856	23437	22106	21203	25008	22237.8
2369	unknown259	0.000572095	0.00471842	18	6	4261.03	0.163026	0.980144	20	6	10890	0.00095878	0.00823714	19	6.01667	6018.42	5237.42	0.870231	3987	338	2617	3346	12862	13478	7348	9872	2731	3752	3088	2184	6634	4882	3888	5133	5383.75
2383	unknown2601	0.000320124	0.00340574	18	15	2808.27	0.0756214	0.9295	20	12	10645.5	0.000281513	0.00419015	19	13.6167	7291.11	4051.49	0.555675	8103	7049	6333	6870	4096	4419	4239	4918	12659	9515	12376	8032	5377	8007	6773	7264	7251.88
2386	unknown2604	0.000572095	0.00471842	18	6	1931.11	0.687438	1	20	6	5320	0.00347698	0.0187644	19	6.01667	4304.17	1029.29	0.239137	4351	4009	2809	2806	5553	5805	4411	5511	1620	1216	2025	1990	5381	8368	5566	5450	4179.44
2390	unknown2608	0.0299489	0.0829149	18	6	2053.79	0.613819	1	20	5.99999	13033.5	0.0918484	0.243244	19	6.01666	9925.24	3491.61	0.351791	8156	7639	6402	6590	12829	17763	9055	12487	8445	7764	8521	7003	10682	10856	9417	8425	9502.12
2391	unknown2609	4.22e-05	0.00116331	18	6	125605	0.237225	1	20	6	312435	0.0001252	0.00288314	19	6.01667	190530	131430	0.689812	120033	116747	87893	74003	362633	361901	263180	262025	87000	84254	115891	83701	211313	203086	186452	173542	174603
2393	unknown2610	8.77e-05	0.00171035	18	6	5395.58	0.231361	1	20	6	14861.5	0.00023951	0.0038842	19	6.01667	9475.79	5790.27	0.61106	6438	6043	5046	4507	17184	16727	13235	12300	4931	4684	6096	4655	10364	10419	9081	8676	8774.12
2394	unknown2611	4.22e-05	0.00116331	18	6	36162.7	0.164992	0.980144	20	6	82777	8.96e-05	0.00245256	19	6.01667	47446.9	37589.8	0.792251	29861	25986	19293	16425	92792	94459	75140	68717	17825	17540	23342	18254	52164	51469	44599	38402	42891.8
2395	unknown2612	0.0419656	0.10784	24	0	1380.27	0.397323	1	24.0327	6.63e-05	8468.24	0.0849354	0.228145	24.0163	3.31e-05	6899.54	1954.85	0.28333	9338	11693	5512	7330	6963	7447	4740	5879	5294	4772	5413	5992	7568	8860	6067	7508	6898.5
2398	unknown2615	0.00421867	0.0189687	18	6	1523.46	0.785209	1	20	6	3458.75	0.0222273	0.0779304	19	6.01667	2684.7	824.32	0.307043	2205	2626	1435	1482	3307	3296	3939	3293	761	519	863	948	5714	3840	3580	3549	2584.81
2399	unknown2616	2.89e-06	0.00035704	18	6	37990	0.182909	0.993547	20	6	89873.8	8.16e-06	0.000929583	19	6.01667	51860.6	40447.1	0.779918	30978	29034	21611	19877	98593	108170	73146	79586	19364	19476	28029	17777	57710	55779	50607	41611	46959.2
2400	unknown2617	0.000987235	0.00692825	18	9	1399.72	0.285582	1	20	6	5864.25	0.00258644	0.0154306	19	7.6	4551.27	1238.5	0.272122	2747	3202	2319	4075	5338	6394	6022	5703	2761	4448	4759	4782	3895	4721	3208	4551	4307.81
2405	unknown2621	0.00164724	0.00965163	24	0	7983.77	0.225519	1	24.7059	6.63e-05	25161.7	0.00330547	0.0180716	24.3529	3.27e-05	15306.2	11225.9	0.73342	22273	45838	14250	18286	10631	11670	6459	7563	9068	6636	6101	9820	21924	23836	14321	14227	15181.4
2408	unknown2624	8.77e-05	0.00171035	18	6	23607.5	0.0576201	0.9295	20	6	46013.2	6.67e-05	0.00217065	19	6.01667	23125.7	24068.4	1.04077	10126	10414	7967	6438	48855	50216	39988	44994	7198	8006	9696	7678	23422	18366	15504	14477	20209.1
2410	unknown2626	0.000572095	0.00471842	18	6	6432.55	0.0723447	0.9295	20	6	12628.8	0.000459097	0.00537271	19	6.01667	6755.5	6221.66	0.920976	3292	3801	2440	2047	12567	13426	11441	13081	2664	2781	3519	2456	7453	5650	4809	4598	6001.56
2411	unknown2627	0.0210199	0.0632056	18	0	590.788	0.261656	1	24.1644	17.9999	4150.99	0.0341164	0.109102	21.0822	18.3931	3431.86	1051.26	0.306323	5104	6375	2865	3710	2762	3404	2077	2685	2799	2533	3004	3128	4236	4739	3234	4395	3565.62
2412	unknown2628	7.77e-06	0.000473861	18	6	19770.7	0.0928446	0.93685	20	6	34835	1.09e-05	0.000985394	19	6.01667	17037.2	18737.9	1.09982	7279	6035	4726	4164	36031	36560	35662	31087	2975	3279	5340	4455	22885	14486	11405	9896	14766.6
2413	unknown2629	7.77e-06	0.000473861	18	6	5378.25	0.0890193	0.935067	20	6	9741.5	1.05e-05	0.000967577	19	6.01667	4819.96	5172.78	1.0732	2021	2029	1387	1269	9027	9908	11280	8751	935	1087	1578	1327	5985	4241	3205	3060	4193.12
2416	unknown2631	0.0299489	0.0829149	18	3	349.134	0.288865	1	23.9024	6.63e-05	3269.99	0.0497449	0.147028	20.9512	1.74596	2513.98	981.8	0.390536	3442	5098	1934	2606	2361	2303	1759	1632	1741	1487	2040	2104	3697	3816	2253	3209	2592.62
2419	unknown2634	0.0144977	0.0475569	24	0	2601.09	0.105785	0.946907	23.9024	6.63e-05	8552.24	0.0114718	0.0463366	23.9512	3.32e-05	7129.95	2992.6	0.419722	9477	11251	5934	7547	6529	6975	4909	4981	5155	4505	5206	5494	9202	10544	7304	9143	7134.75
2423	unknown2638	0.00421867	0.0189687	24	12	10669.5	0.0507526	0.9295	22.9091	12	39529.5	0.00202312	0.0129978	23.4545	12.0065	29189.6	13088.4	0.448394	24045	23155	15942	20166	36155	40328	22803	30380	39113	41498	43033	34474	22355	21550	19136	29222	28959.7
2425	unknown264	0.0210199	0.0632056	24	12	873.1	0.315056	1	24.4321	12	3792	0.0398491	0.12246	24.2161	12.001	3127.46	1025.81	0.327999	2792	1713	943	3675	2973	4016	3767	4130	2893	4317	4027	3931	2551	2097	2800	3531	3134.75
2431	unknown2645	0.0299489	0.0829149	24	9	4494.37	0.324471	1	21.995	6	24405.8	0.054747	0.158142	22.9975	7.44877	19498.9	5004.14	0.256636	15311	12124	16926	21223	17499	28938	21671	29515	16909	17447	24810	23278	12981	15822	14890	19231	19285.9
2434	unknown2648	0.00421867	0.0189687	24	18	3288.05	0.0202017	0.9295	28	17.9999	16877	0.000883794	0.00780985	26	18.1071	13345.8	1435.88	0.107591	10984	11406	8476	11260	11772	10035	10535	11622	13971	14947	14510	15285	14286	18252	17850	17120	13269.4
2435	unknown2649	0.0065055	0.0255615	24	18	797.263	0.0316743	0.9295	28	17.9999	4452.5	0.00195494	0.012672	26	18.1071	3655.65	333.152	0.0911335	3327	3057	2480	3144	3389	2686	2922	3374	4055	4167	3817	3979	3810	4804	4885	4311	3637.94
2438	unknown2651	0.00421867	0.0189687	24	12	1918.73	0.0973897	0.945467	23.7736	12	11105.8	0.0036144	0.0192265	23.8868	12.0003	8863.97	2716.8	0.3065	7917	7649	4911	6321	9946	10247	7709	10262	13269	9730	11740	9684	6611	8778	7317	9572	8853.94
2451	unknown2663	0.00980952	0.0347873	24	21	1100.61	0.0497463	0.9295	24.0327	17.9999	2361.99	0.004209	0.0213407	24.0163	19.501	1623.34	1295.39	0.797977	2632	4213	1506	2104	766	766	675	700	842	598	653	1056	2227	2753	2201	2267	1622.44
2471	unknown2681	0.0299489	0.0829149	24	12	1775.72	0.146371	0.966499	23.6461	12	8068.75	0.0281864	0.0942448	23.8231	12.0007	6611.3	2015	0.304782	5607	7262	3602	5093	8335	8077	5302	7771	7651	8315	8115	8194	5753	5436	4552	6530	6599.69
2474	unknown2684	0.0065055	0.0255615	24	15	478.711	0.0495264	0.9295	20	12	5695	0.00291275	0.0165297	22	13.475	5066.08	797.624	0.157444	4628	4911	4434	5153	4677	4742	4613	4595	6071	5904	5419	5386	4899	5360	4749	5173	5044.62
2475	unknown2685	0.00980952	0.0347873	18	3	478.358	0.168489	0.980144	24.2975	6.63e-05	6793.74	0.0122394	0.04889	21.1488	1.76243	5957.17	1603.23	0.269127	5664	9137	5701	6673	5629	5778	4857	4554	4296	4494	4895	6000	7853	7498	6333	7808	6073.12
2482	unknown2691	4.22e-05	0.00116331	18	3	1008.33	0.0699797	0.9295	25.1282	6.63e-05	6130.74	4.05e-05	0.00172082	21.5641	1.79704	5446.27	2689.89	0.493895	6084	7350	4718	6371	4226	5030	3783	5015	3634	3463	4223	3734	7875	9128	6214	8748	5599.75
2489	unknown2698	0.000572095	0.00471842	18	0	2451.89	0.0685279	0.9295	23.2718	17.9999	13176.7	0.000437001	0.00522711	20.6359	18.2985	10889.5	2954.82	0.271346	16266	14657	11523	12331	7630	8865	7309	9596	10920	9926	10094	9375	13443	15247	10816	13201	11324.9
2490	unknown2699	0.0065055	0.0255615	18	0	1955.86	0.127423	0.963963	23.3952	17.9999	12609.7	0.00671065	0.0307158	20.6976	18.311	10223.3	2727.19	0.266762	15006	14796	9399	10999	7097	9060	7035	8468	11125	8579	9972	7907	12708	14657	10537	12537	10617.6
2493	unknown2700	0.000987235	0.00692825	18	0	6985.86	0.0541113	0.9295	23.52	17.9999	37888	0.000578935	0.00609924	20.76	18.3238	31703.1	8110.02	0.255811	45605	41226	33523	37383	21851	26585	22474	29147	31884	27908	30025	26485	37707	42670	32580	38595	32853
2494	unknown2701	0.000572095	0.00471842	18	0	1462.12	0.10045	0.946907	23.2718	17.9999	7105.74	0.000618589	0.0063172	20.6359	18.2985	6146.06	1483.53	0.241379	8699	8043	6675	7446	4078	5004	4779	5475	6819	5378	5990	5026	6559	8443	6291	7130	6364.69
2503	unknown271	0.00164724	0.00965163	18	6	6996.82	0.150698	0.966499	20	6	15234.5	0.00230888	0.014323	19	6.01667	7939.25	7591.49	0.956198	6713	458	1724	5200	15762	19037	11084	15055	2812	3489	2256	1356	10834	7128	3295	6106	7019.31
2505	unknown2711	0.000572095	0.00471842	24	21	2209.36	0.0661103	0.9295	23.3952	17.9999	10564.5	0.000422942	0.00514421	23.6976	19.484	8623.54	2521.73	0.292424	10462	12435	8194	9248	7331	6842	4993	6184	7924	6417	8214	8004	9690	10860	9302	12406	8656.62
2506	unknown2712	0.00267199	0.0134688	24	21	1780.49	0.0585211	0.9295	23.7736	17.9999	7249.49	0.00152667	0.0108368	23.8868	19.4933	5769.28	1830.46	0.317277	7290	8414	4982	6182	4614	4091	3530	4381	5449	3961	5337	5222	7109	7592	6252	8045	5778.19
2525	unknown273	0.0419656	0.10784	24	9	26901.5	0.347877	1	22.6735	5.99999	197346	0.0763054	0.208062	23.3368	7.46339	168962	27841.2	0.164777	146814	141813	159431	173596	181322	200362	199968	207731	136836	227911	175151	158984	131519	126828	138571	183982	168176
2529	unknown2733	0.0299489	0.0829149	24	21	963.61	0.189215	0.994309	24.0327	17.9999	4156.24	0.0349818	0.111294	24.0163	19.501	3419.43	967.867	0.28305	4456	5161	2804	3519	2829	3322	2225	2530	2703	2728	2938	2860	4212	4782	3014	4617	3418.75
2531	unknown2735	0.0144977	0.0475569	24	21	2527.73	0.114494	0.946907	23.9024	17.9999	11028.2	0.0122849	0.0490264	23.9512	19.497	8993.88	2746.98	0.305428	11504	13741	7627	9668	7778	7991	5220	6460	7410	6590	7890	8002	10600	12402	8914	12197	8999.62
2532	unknown2736	0.00421867	0.0189687	24	9	1913.08	0.0735885	0.9295	24.1644	5.99999	7379.25	0.00281807	0.0161192	24.0822	7.5052	5738.42	1889.61	0.32929	4868	7127	4345	3498	6138	7137	7645	8597	7141	7328	5736	6196	3483	3861	4962	3859	5745.06
2537	unknown2740	0.0419656	0.10784	18	6	217.789	0.361474	1	20	6.00001	901.5	0.0787063	0.213533	19	6.01667	695.118	208.307	0.299672	678	460	767	459	837	975	847	947	574	574	627	342	468	866	727	570	669.875
2540	unknown2743	0.00421867	0.0189687	24	0	1702.71	0.105813	0.946907	24.5682	6.63e-05	5721.23	0.00388999	0.0203402	24.2841	3.28e-05	3669.81	2371.17	0.646128	6144	8917	3796	4028	2762	2700	1482	1906	2405	1849	2049	2448	4903	5142	3625	4219	3648.44
2558	unknown276	0.000987235	0.00692825	18	6	2925.65	0.185752	0.994309	20	6	9469.5	0.00176118	0.0118231	19	6.01667	5719.01	3987.43	0.697224	3537	2287	3298	3718	9029	13266	6528	9055	2762	4195	3627	2500	5825	4324	3855	5967	5235.81
2579	unknown2779	0.00164724	0.00965163	24	21	1976.72	0.130321	0.964726	24.2975	17.9999	5540.98	0.00202786	0.0129978	24.1488	19.5099	4349.58	2695.68	0.619756	6827	10909	4250	4614	2542	2817	2037	2298	3236	2371	2667	2589	5457	7106	4618	4983	4332.56
2580	unknown278	0.00421867	0.0189687	18	6	2332.04	0.403752	1	20	6	6386.25	0.0125621	0.0499028	19	6.01667	3839.76	2763.53	0.719715	3267	116	1710	2530	7333	7828	4853	5531	1597	2627	2042	1602	5885	3568	1986	3603	3504.88
2583	unknown2782	0.000320124	0.00340574	18	0	733.977	0.0900396	0.935067	24.5682	17.9999	1984.24	0.000330157	0.00445769	21.2841	18.439	1432.8	1037.12	0.723839	2460	4196	1564	2239	1037	810	572	539	1126	631	821	953	2072	2323	1526	2016	1555.31
2588	unknown2787	0.00421867	0.0189687	18	0	2833.38	0.0668529	0.9295	24.1644	17.9999	7821.98	0.0025872	0.0154306	21.0822	18.3931	5527.65	3140	0.568054	10834	9704	7652	6389	2337	3935	2441	5289	5749	2690	3690	2837	6720	11043	6709	6816	5927.19
2590	unknown2789	0.0419656	0.10784	24	21	822.365	0.204621	1	23.9024	17.9999	3667.49	0.0494398	0.146526	23.9512	19.497	3103.45	888.973	0.286446	3911	4976	2529	3475	2585	3121	1894	2089	2346	2569	2653	2867	3961	4049	2934	3726	3105.31
2593	unknown2791	0.0144977	0.0475569	18	0	1281.28	0.222803	1	24.5682	17.9999	8305.24	0.0217557	0.0767304	21.2841	18.439	7195.22	1976.93	0.274756	9847	13066	6414	8349	6050	7270	4789	5703	5835	5402	6199	6715	8464	9439	7152	8166	7428.75
2594	unknown2792	0.0299489	0.0829149	18	0	1162.13	0.485667	1	23.1496	17.9999	8279.99	0.0760786	0.207574	20.5748	18.2864	7254.02	1526.62	0.210451	9556	11985	5914	7926	5859	6961	4633	6143	6994	6161	7282	7197	8725	8884	6601	8910	7483.19
2607	unknown2803	0.0299489	0.0829149	24	12	1900	0.210718	1	20	12	9910.5	0.038278	0.118643	22	12.1	7460.76	2687.91	0.360273	6508	7704	4114	4950	8117	8879	5242	6400	9746	10419	10829	8648	6861	5068	4218	9132	7302.19
2608	unknown2804	0.0299489	0.0829149	18	0	610.233	0.321773	1	24.4321	17.9999	3654.49	0.0543723	0.157292	21.2161	18.4233	3060.19	1073.15	0.35068	4332	6604	2539	3556	2685	2806	1765	1933	2647	2358	2424	2777	3893	4017	3040	3668	3190.25
2610	unknown2806	0.00164724	0.00965163	24	12	25600.6	0.0934636	0.93685	25.7143	12	259573	0.00150552	0.010746	24.8571	12.0143	236867	32240.9	0.136114	213691	212365	167676	212299	282205	266253	245715	226102	250734	270119	259840	257599	229988	240605	235574	233774	237784
2614	unknown281	0.000987235	0.00692825	18	6	3043.74	0.121107	0.960278	20	6	9193.5	0.0011994	0.00930717	19	6.01667	5073.24	4342.63	0.855987	2760	1705	2575	2817	9176	12828	6110	8660	2166	2939	2887	1906	5044	3538	2981	4660	4547
2619	unknown2814	0.00421867	0.0189687	18	3	835.447	0.134161	0.964981	23.7736	6.63e-05	5650.74	0.0047978	0.0235806	20.8868	1.7406	4485.71	1482.28	0.330445	5602	7742	4073	5186	4160	4523	2653	4181	3447	2918	3315	3974	5722	5761	4759	5717	4608.31
2621	unknown2816	0.0210199	0.0632056	18	0	1244.33	0.651022	1	20	17.9999	8219	0.072411	0.199073	19	18.05	7524.21	1460.86	0.194154	10378	12971	6379	8561	6115	6831	4887	6428	7580	7195	7400	7865	9343	8163	6611	8759	7841.62
2627	unknown2821	0.000987235	0.00692825	24	21	1751.86	0.0769269	0.9295	22.5575	17.9999	10960.2	0.000796321	0.00737288	23.2788	19.4722	9357.57	1943.28	0.207669	11914	11460	9040	9500	6429	8150	6611	8327	9711	8696	8938	8096	10423	12683	10018	10717	9419.56
2631	unknown2825	0.0065055	0.0255615	24	21	1529.47	0.0434978	0.9295	24.0327	17.9999	4682.74	0.00259492	0.0154315	24.0163	19.501	3520.95	1711.35	0.486047	4812	6365	3394	4065	2484	2981	1817	2045	2440	2199	2382	2601	4650	5671	4199	4211	3519.75
2632	unknown2826	0.0419656	0.10784	24	21	1723.57	0.678217	1	20	18	9634.74	0.129763	0.319791	22	19.525	8607.19	1869.44	0.217195	10360	15804	6403	9902	6239	7981	5219	7033	8431	8494	7328	8744	10689	10462	7312	10076	8779.81
2634	unknown2828	0.00164724	0.00965163	24	12	5218.45	0.0121216	0.9295	24.0327	12	13791.2	0.000236041	0.0038842	24.0163	12	9732.41	6362.82	0.653777	5723	5850	5181	6311	12162	12020	13242	15252	11435	15996	14144	13590	5130	6104	6678	6955	9735.81
2637	unknown2830	0.00980952	0.0347873	18	3	357.442	0.248698	1	24.0327	6.63e-05	3132	0.0171161	0.0636707	21.0163	1.75139	2593.86	640.438	0.246905	3173	4202	2324	2829	2392	2802	1565	2170	2233	2087	2150	2166	3291	3475	2524	2913	2643.5
2639	unknown2832	7.77e-06	0.000473861	24	21	1728.17	0.0208268	0.9295	23.6461	17.9999	5496.49	2.69e-06	0.000589942	23.8231	19.4899	3754.09	1888.03	0.502925	4459	4603	3893	5086	2021	1821	2032	1789	2950	2636	3779	3241	4005	6519	6189	5273	3768.5
2647	unknown284	0.00421867	0.0189687	18	6	13179.8	0.119285	0.960043	20	6	28445	0.00432494	0.0218009	19	6.01667	15133.8	14131.5	0.933772	10260	1908	3347	9784	24831	35383	23403	30163	6628	8988	6591	4160	16743	14847	5996	11709	13421.3
2651	unknown2843	7.77e-06	0.000473861	24	21	860.549	0.0148685	0.9295	23.52	17.9999	3128.49	1.96e-06	0.000589942	23.76	19.4868	2344.15	912.195	0.389136	2797	2917	2586	2803	1488	1555	1251	1588	2076	1698	2303	2082	2590	3464	3124	3336	2353.62
2657	unknown2849	0.00267199	0.0134688	18	0	910.754	0.0987784	0.946907	24.5682	17.9999	3238.99	0.00243871	0.0148309	21.2841	18.439	2534.92	1276.35	0.503507	3735	6004	2720	3415	1820	2068	1440	1424	1755	1783	1917	1934	3210	3992	2807	2947	2685.69
2662	unknown2853	0.00164724	0.00965163	18	0	2330.62	0.0342844	0.9295	23.9024	17.9999	10906	0.000608894	0.0062774	20.9512	18.3644	8269.73	3058.16	0.369802	10663	13591	8468	10986	7070	7012	4731	5466	5853	6633	7404	7330	10980	12404	9987	10253	8676.94
2668	unknown2859	0.00164724	0.00965163	24	12	1236.2	0.0919453	0.93676	23.2718	12	6986.25	0.00148354	0.0106876	23.6359	12.0029	5625.49	1657.52	0.294645	4701	4785	3825	4329	6484	7099	4909	5511	6421	7689	7644	6191	5007	4824	3931	6345	5605.94
2669	unknown286	0.000987235	0.00692825	18	6	46334.9	0.139513	0.965964	20	6	87673.2	0.00136219	0.0101269	19	6.01667	39462.4	50699.2	1.28475	17416	1884	2380	13670	71299	126198	70242	82954	5782	9823	5761	2474	55435	39011	10886	17884	33318.7
2674	unknown2864	0.00421867	0.0189687	18	0	955.655	0.113699	0.946907	24.1644	17.9999	6708.74	0.00414542	0.0211173	21.0822	18.3931	5902.06	1243.19	0.210637	7611	8598	5707	6930	5192	5751	4646	4583	4847	5273	5336	5655	7345	7151	5528	6811	6060.25
2678	unknown2868	0.000987235	0.00692825	18	0	866.559	0.116455	0.951726	24.0327	17.9999	4291.99	0.00115783	0.00908929	21.0163	18.3786	3515.09	1076.85	0.30635	4494	5950	3950	3942	2909	2998	2424	2702	2873	3173	2717	3185	4917	5319	3210	3722	3655.31
2680	unknown287	0.00215962	0.0125857	18	6	263.574	0.121748	0.960278	20	6	536	0.00243042	0.0148013	19	6.01667	205.453	343.626	1.67253	36	2	6	15	375	939	425	405	13	16	5	2	228	123	9	22	163.812
2691	unknown288	0.000572095	0.00471842	18	6	4273.4	0.154024	0.974165	20	6	10923.2	0.000910845	0.00796759	19	6.01667	5631.64	5428.54	0.963936	4256	1407	1659	3465	8944	15758	7303	11688	1851	2114	1795	793	7410	4316	2231	4591	4973.81
2702	unknown289	0.00164724	0.00965163	18	6	17106	0.0837033	0.9295	20	6	40558.5	0.00136351	0.0101269	19	6.01667	20534.5	20701.2	1.00812	12779	3801	7596	12762	32696	55762	30470	43306	7224	9976	8757	4811	20787	14808	7264	15616	18025.9
2711	unknown2898	0.0419656	0.10784	24	12	1186.53	0.182682	0.993547	24.0327	12	6437.5	0.0450086	0.13581	24.0163	12	5610.71	1354.91	0.241487	4862	6133	3361	4373	7512	7043	5234	5927	6716	6551	6151	6332	4665	5273	3991	5659	5611.44
2725	unknown291	4.22e-05	0.00116331	18	6	2202.64	0.0751609	0.9295	20	6	4389	4.33e-05	0.00177358	19	6.01667	2042.37	2460.64	1.2048	824	440	446	657	3545	5409	5054	3548	403	968	423	231	2006	1232	933	1788	1744.19
2736	unknown292	0.000572095	0.00471842	18	6	3019.88	0.0397067	0.9295	20	6.00001	6106.75	0.000265605	0.00409811	19	6.01667	2872.92	3231.08	1.12467	2305	862	713	1803	4966	7741	5082	6638	918	859	642	276	2848	1460	1112	1477	2481.38
2737	unknown2920	0.0144977	0.0475569	24	12	1173.8	0.176991	0.990633	24.0327	12	6258	0.017873	0.0655848	24.0163	12	5396.16	1341.37	0.248579	4521	5789	3547	4244	6897	6973	5208	5396	5461	7066	6185	6320	5238	4795	3613	5097	5396.88
2757	unknown2939	0.0144977	0.0475569	24	12	2263.8	0.226143	1	20	12	16228.5	0.0220331	0.0773748	22	12.1	13473.5	3373.78	0.250402	12029	15983	8897	10293	14790	14607	12741	12422	16913	17070	14594	16337	12455	11622	9197	12441	13274.4
2758	unknown294	0.000171384	0.00241724	18	6	3534.12	0.0718338	0.9295	20	6	6296	0.000151489	0.00321543	19	6.01667	2915.75	3514.87	1.20548	1389	332	610	1332	6189	7698	5423	5874	497	1097	589	275	3713	2297	869	1653	2489.81
2764	unknown2945	0.0144977	0.0475569	24	21	883	0.336551	1	23.0287	17.9999	5312.49	0.0308502	0.10092	23.5144	19.4773	4752.61	1050.42	0.22102	5614	7454	4640	4756	4060	3998	3248	3769	4458	3985	4332	4835	6086	5917	4017	5230	4774.94
2766	unknown2947	0.0419656	0.10784	24	21	1146.93	0.187259	0.994309	23.9024	17.9999	7154.49	0.0459417	0.138019	23.9512	19.497	6283.52	1275.84	0.203046	7661	8743	5777	6284	5714	6106	4165	5237	5524	5014	5923	5813	7494	7866	6102	7156	6286.19
2769	unknown295	0.000320124	0.00340574	18	6	3436.54	0.0750322	0.9295	20	6	6321.25	0.000279508	0.00418778	19	6.01667	2940.06	3522.07	1.19796	1271	418	585	1398	6097	7956	5367	5865	560	940	681	379	3658	2357	915	1765	2513.25
2778	unknown2958	0.0419656	0.10784	24	12	4864.89	0.151227	0.966499	24.1644	12	24045.5	0.038458	0.11903	24.0822	12.0001	20465.3	5714.62	0.279235	16171	21515	11641	16228	27520	27502	19932	20269	21492	25289	25044	24357	19006	17873	13319	20533	20480.7
2780	unknown296	0.000320124	0.00340574	18	6	56460.4	0.0863282	0.9295	20	6	117361	0.000317712	0.00444112	19	6.01667	51287	68545.4	1.33651	19914	6659	6878	18284	113962	167234	84978	103269	6954	12016	7822	2954	63898	36228	13424	23217	42980.7
2785	unknown2964	0.0065055	0.0255615	18	0	1184.76	0.238394	1	24.1644	17.9999	7969.49	0.0115834	0.0466567	21.0822	18.3931	6993.06	1548.73	0.221467	8730	11136	6917	7726	6094	6866	5181	5238	6590	6118	5650	6918	8773	9350	6644	7111	7190.12
2788	unknown2967	0.00980952	0.0347873	24	12	13320.1	0.114661	0.946907	23.2718	12	53311	0.00876217	0.0373795	23.6359	12.0029	40996.9	16630.2	0.405645	29243	44104	24100	31744	54697	52516	42843	34900	41495	63290	50814	57645	34709	31410	25831	33471	40800.8
2791	unknown297	8.77e-05	0.00171035	18	6	439.113	0.0591019	0.9295	20	6	911.75	6.83e-05	0.00219274	19	6.01667	336.227	594.996	1.76963	31	12	2	27	968	1385	668	626	7	10	9	7	290	108	20	56	264.125
2792	unknown2970	0.00980952	0.0347873	24	0	599.98	0.0262825	0.9295	24.0327	6.63e-05	1643.25	0.00238824	0.0146267	24.0163	3.31e-05	1169.7	719.096	0.614771	1768	2158	1347	1300	986	902	620	639	710	678	693	738	1690	1557	1332	1591	1169.31
2800	unknown2978	0.000320124	0.00340574	18	0	1124.3	0.0592196	0.9295	23.9024	17.9999	7767.24	0.00022509	0.00387044	20.9512	18.3644	6438.5	1723.09	0.267623	8403	9283	6244	8332	5640	5388	4817	4785	5548	5384	5877	5917	8519	8192	6029	8329	6667.94
2804	unknown2981	0.000320124	0.00340574	18	0	1739.48	0.309441	1	24.8451	17.9999	6266.99	0.00101237	0.00843635	21.4225	18.4714	5117.97	2724	0.532242	7422	14604	4796	6704	2995	3686	2770	2937	4308	3250	3292	4932	7364	6281	5383	6040	5422.75
2809	unknown2986	0.00980952	0.0347873	24	0	1814.61	0.0867679	0.929963	24.1644	17.9999	7266.49	0.00686787	0.0311392	24.0822	21.0105	6225.01	1925.82	0.309369	8213	10426	5832	7066	5127	5792	4244	4063	4953	4707	4876	5118	7938	7734	6158	7236	6217.69
2814	unknown2990	0.00421867	0.0189687	18	0	531.921	0.0752285	0.9295	24.4321	17.9999	2686.74	0.00287388	0.016352	21.2161	18.4233	2209.61	796.888	0.360647	3248	4137	2275	2650	1795	1914	1534	1476	1816	1733	1688	1886	2733	3024	2297	2693	2306.19
2817	unknown2993	0.0299489	0.0829149	18	0	486.666	0.178332	0.990633	23.52	17.9999	5727.99	0.0332862	0.107159	20.76	18.3238	4841.72	1008.82	0.20836	6671	6784	4185	5144	4475	4578	3023	3944	4712	4448	4479	4401	5804	6085	5040	5983	4984.75
2819	unknown2995	0.000171384	0.00241724	18	0	634.982	0.0194039	0.9295	24.0327	17.9999	1780.49	4.53e-05	0.00180232	21.0163	18.3786	1224.06	770.885	0.629779	2059	2506	1480	1931	762	794	687	555	889	778	800	828	1756	2120	1643	1603	1324.44
2828	unknown3001	0.000320124	0.00340574	18	0	793.727	0.113826	0.946907	24.0327	17.9999	5881.74	0.000408835	0.00506276	21.0163	18.3786	4985.31	1363.65	0.273534	7026	8170	4785	5585	3956	4482	3517	3788	4606	4094	4538	4532	6142	6465	5078	5842	5162.88
2830	unknown3003	0.0144977	0.0475569	18	9	1157.18	0.172104	0.981551	24.0327	6	6431.75	0.0174494	0.0646884	21.0163	7.87756	5546.46	1214.57	0.218981	4654	5552	3405	3769	7022	8038	5533	5134	6002	6304	6296	5804	4826	5304	3842	4726	5388.19
2832	unknown3005	0.0065055	0.0255615	24	12	6281.41	0.0782995	0.9295	24.0327	6	28896.5	0.00437163	0.0219791	24.0163	9.00205	23830.5	6654.31	0.279235	18410	22839	16969	15987	31302	36729	23375	24180	26322	29798	28548	28053	20418	22555	16266	19617	23835.5
2837	unknown301	0.000987235	0.00692825	18	6	3127.53	0.3322	1	20	6	11652.2	0.00295905	0.0167486	19	6.01667	5382.53	6639.64	1.23355	2532	858	989	691	12290	20937	5075	8307	918	1911	1409	613	7367	3500	2269	3581	4577.94
2839	unknown3011	0.0065055	0.0255615	24	12	2415.83	0.069577	0.9295	23.7736	12	9593.5	0.0039381	0.0204706	23.8868	12.0003	7639.91	2783.12	0.364288	6197	8006	4590	5173	9001	9911	9541	6721	8743	10135	9673	9823	5842	6411	4720	7587	7629.62
2840	unknown3012	0.0299489	0.0829149	18	9	802.389	0.262022	1	24.4321	6	4355.25	0.0458877	0.137982	21.2161	7.90912	3868.87	730.211	0.18874	3162	3581	2540	2906	5066	5377	3436	3542	4034	4261	4740	4019	3371	3837	2891	3709	3779.5
2850	unknown3021	0.000572095	0.00471842	18	0	703.925	0.192291	0.997147	23.9024	17.9999	4982.99	0.00111273	0.00890407	20.9512	18.3644	4385.58	968.21	0.220771	5195	7111	4686	4657	3833	3997	3262	3257	4119	3982	3878	4323	5299	5605	4351	4677	4514.5
2853	unknown3024	0.00164724	0.00965163	18	0	765.797	0.0909268	0.935114	24.1644	17.9999	4517.74	0.00146878	0.0106174	21.0822	18.3931	3649.44	1271.67	0.348456	5249	6593	3620	4355	3096	2853	2402	2791	3177	2670	3127	2976	4840	5356	3518	4357	3811.25
2854	unknown3025	0.00267199	0.0134688	24	21	726.906	0.166601	0.980144	23.52	17.9999	3915.5	0.00388048	0.0203174	23.76	19.4868	3408.15	852.387	0.250103	3817	5272	3070	3984	2562	2957	2713	2416	2970	2874	3246	3129	4193	4528	3210	3731	3417
2858	unknown3029	0.0065055	0.0255615	18	0	1149.76	0.271191	1	24.9858	17.9999	5477.24	0.0129495	0.05116	21.4929	18.4883	4921.16	1434.6	0.291517	6491	9385	5741	5168	3920	4638	3701	3506	4703	4151	3686	4235	6942	5859	4071	5037	5077.12
2859	unknown303	0.000320124	0.00340574	18	6	5126.17	0.0545565	0.9295	20	6	11010.5	0.000208798	0.00370531	19	6.01667	5282.51	5832.84	1.10418	3569	1499	1341	2836	10624	13159	8320	11939	1305	1506	1589	782	5682	4448	1530	3082	4575.69
2867	unknown3037	0.0065055	0.0255615	24	12	948.584	0.122987	0.962988	22.6735	12	5158	0.00650535	0.0299981	23.3368	12.0097	4276.04	1124.94	0.263079	3835	4341	2875	3333	5211	5149	3987	3842	4752	5411	5239	5230	3791	3734	2991	4313	4252.12
2871	unknown3040	0.0254844	0.0764709	24	0	150.967	0.160881	0.979768	23.7736	6.63e-05	723.249	0.0266365	0.0899658	23.8868	3.33e-05	598.149	193.743	0.323905	836	826	639	592	504	666	440	460	526	409	424	480	616	916	592	656	598.875
2872	unknown3041	0.00267199	0.0134688	18	0	513.89	0.0315813	0.9295	23.9024	17.9999	2120	0.000875927	0.00778801	20.9512	18.3644	1551.92	673.205	0.433788	2378	2642	1624	1954	1116	1346	893	937	1092	1063	1275	1465	2063	2369	2226	1822	1641.56
2876	unknown3045	0.0065055	0.0255615	24	9	1265.54	0.138018	0.965964	23.9024	6.00001	7571.25	0.0071969	0.032204	23.9512	7.49698	6467.56	1435.76	0.221994	6031	6477	3851	5909	8158	8049	7350	6728	6009	7853	7952	7257	6306	5778	4150	5575	6464.56
2880	unknown3049	0.0065055	0.0255615	18	0	996.667	0.164853	0.980144	24.1644	17.9999	7685.24	0.00840567	0.0361795	21.0822	18.3931	6596.85	1603.46	0.243065	8532	10943	6721	6850	5769	6488	4847	5112	5929	5598	5686	5598	7809	9151	6662	7119	6800.88
2884	unknown3052	0.0299489	0.0829149	24	0	697.207	0.280215	1	23.1496	6.63e-05	3779.75	0.0485104	0.144509	23.5748	3.38e-05	3266.7	837.224	0.25629	4457	4533	2910	3219	2722	3912	2382	3020	2681	2433	2621	2717	3660	4235	3268	3692	3278.88
2886	unknown3054	0.0419656	0.10784	18	12	1148.34	0.243766	1	21.0501	12	6556.5	0.0571074	0.16311	19.5251	12.0737	5341.15	1336.46	0.250219	5006	4818	3040	4134	5832	6354	4288	4847	5697	6667	7274	6588	3947	4812	3412	6387	5193.94
2889	unknown3057	0.00421867	0.0189687	24	12	1373.02	0.100535	0.946907	20.9501	12	8129.75	0.00371766	0.0196072	22.4751	12.0555	6523.36	1858.43	0.284889	6125	6024	3893	5088	7282	7379	5753	6037	7954	8348	8365	7852	4806	6359	4605	7115	6436.56
2893	unknown3060	0.00164724	0.00965163	24	21	925.249	0.0173979	0.9295	24.0327	17.9999	2347.24	0.000328428	0.00445769	24.0163	19.501	1524.51	1090.3	0.715181	2150	2792	1892	1853	813	815	600	799	802	804	861	810	2046	3059	2103	2181	1523.75
2897	unknown3064	0.00267199	0.0134688	18	0	822.896	0.137232	0.965964	23.1496	17.9999	6920.74	0.00326751	0.0179775	20.5748	18.2864	5644.98	1498.15	0.265396	7862	9017	4910	6095	4515	4937	3726	4221	5048	5107	5565	5232	7103	7385	5787	7408	5869.88
2899	unknown3066	0.0299489	0.0829149	18	0	488.611	0.389429	1	20	17.9999	4361.5	0.0635789	0.17888	19	18.05	3804.76	631.638	0.166013	5202	5421	3229	3905	3119	3596	3151	2635	3441	3987	3898	4042	4076	4872	3698	4800	3942
2900	unknown3067	0.0210199	0.0632056	18	12	1196.25	0.293322	1	23.0287	12	9974.25	0.0375408	0.117197	20.5144	12.183	8738.49	1587.97	0.181721	8614	8900	5642	7270	9725	10542	7492	8748	9317	10782	10871	8927	8248	8087	6561	7808	8595.88
2901	unknown3068	0.00421867	0.0189687	24	12	2958.36	0.0670252	0.9295	23.0287	12	16615	0.00259314	0.0154315	23.5144	12.0051	13682.6	3867.7	0.282673	13476	12280	9319	11239	14364	17279	12676	14774	15413	18206	16570	16271	11775	11465	9834	13011	13622
2902	unknown3069	0.000987235	0.00692825	24	12	1391.94	0.0522306	0.9295	23.3952	12	6546	0.000560638	0.00596682	23.6976	12.002	5202.57	1809.66	0.34784	4956	4065	3328	4280	5426	6872	4997	5901	5655	7198	6856	6475	4420	4126	3424	4978	5184.81
2905	unknown3071	0.000320124	0.00340574	24	21	2393.03	0.0297143	0.9295	23.9024	17.9999	7470.98	0.000119502	0.00279699	23.9512	19.497	5877.97	2467.75	0.41983	7014	9387	5920	7903	4053	4085	3546	4021	4563	4708	4686	4360	8091	7577	5901	8315	5883.12
2906	unknown3072	0.0299489	0.0829149	24	12	1748.68	0.165279	0.980144	22.2166	12	9390.5	0.031226	0.101874	23.1083	12.0179	7384.26	2358.65	0.319416	6035	7085	4339	5509	8941	8786	6399	6628	8008	10969	10347	8238	6729	5732	4936	8399	7317.5
2914	unknown308	0.0065055	0.0255615	18	6	92881.3	0.580337	1	20	6	259990	0.0248392	0.0852783	19	6.01667	123045	146858	1.19353	52863	8174	6714	31674	501979	184696	214235	139049	23837	30924	11072	14940	221227	162726	39163	40713	105249
2918	unknown3083	0.0210199	0.0632056	24	12	3960.86	0.159878	0.979097	20	12	19790.8	0.0225015	0.0786231	22	12.1	14449.5	6003.05	0.415452	12018	14607	8685	8619	15108	18386	10150	12281	18741	23178	21772	15472	13207	10235	7916	15150	14095.3
2922	unknown3087	0.000572095	0.00471842	24	21	1179.81	0.0404045	0.9295	23.9024	17.9999	3703.74	0.000269871	0.00412912	23.9512	19.497	2861.26	1190.34	0.41602	4015	4264	2487	3706	2085	2095	1894	1826	1909	2105	2280	2339	4119	4342	2933	3421	2863.75
2926	unknown3090	0.000572095	0.00471842	24	12	5755.85	0.0674043	0.9295	23.2718	12	29207	0.000430473	0.00517764	23.6359	12.0029	22994.9	8060.75	0.350545	19774	21076	13227	17291	25684	29762	23528	22415	23834	35379	30372	27243	20534	18503	17302	20473	22899.8
2927	unknown3091	0.000987235	0.00692825	24	12	4500.2	0.0565431	0.9295	23.2718	12	21769.8	0.000602499	0.00625616	23.6359	12.0029	16985.3	6218.63	0.366119	14808	14782	10056	12427	19165	22040	17348	16696	17287	26062	22492	21238	15624	13028	12776	14762	16911.9
2930	unknown3094	0.00421867	0.0189687	24	21	1126.24	0.0193965	0.9295	24.0327	17.9999	2380.49	0.000851897	0.00766885	24.0163	19.501	1561.03	1205.48	0.772237	2257	3190	1618	2361	809	833	611	564	830	638	808	922	2558	2809	2154	2001	1560.19
2934	unknown3098	0.00164724	0.00965163	24	21	1089.65	0.0424638	0.9295	23.9024	17.9999	3632.74	0.000739196	0.00703454	23.9512	19.497	2826.26	1249.64	0.442152	3764	4999	2745	3237	1898	2193	1619	1792	2095	2105	2224	2060	3616	4217	3130	3568	2828.88
2939	unknown3101	0.0065055	0.0255615	24	0	949.644	0.1701	0.981551	23.6461	6.63e-05	6086.99	0.00863855	0.0370346	23.8231	3.34e-05	5255.32	1290.79	0.245615	6788	6756	4870	5934	4856	5488	4033	4758	4588	4615	4544	3427	6809	6487	4881	5373	5262.94
2944	unknown3106	0.0419656	0.10784	24	21	576.646	0.753307	1	20	17.9999	3675.75	0.14081	0.338915	22	19.525	3371.62	538.101	0.159597	4129	5248	2974	3335	2640	3065	2276	2370	2793	4973	3078	3157	3517	4460	3251	3475	3421.31
2946	unknown3108	0.0144977	0.0475569	24	6	3535.53	0.0627945	0.9295	20	6	24966	0.00728453	0.0324828	22	6.05	16475.7	8153.09	0.494856	14169	15699	9765	14732	30424	29258	20858	19324	11504	14558	14167	14512	16825	11443	8203	10078	15969.9
2948	unknown311	0.000572095	0.00471842	18	6	3520.68	0.201583	1	20	6	9110	0.00116106	0.00909112	19	6.01667	5055.22	4290.36	0.8487	3119	314	2318	3663	5920	10462	9853	10205	1653	2832	2111	1507	6514	5209	2757	4128	4535.31
2949	unknown3110	0.00267199	0.0134688	24	21	730.441	0.0746146	0.9295	23.9024	17.9999	2994.99	0.00189807	0.0123633	23.9512	19.497	2498.54	847.712	0.339283	3095	4140	2415	2846	1896	2190	1775	1493	1866	2158	1898	2253	3285	3287	2620	2788	2500.31
2951	unknown3112	0.0359573	0.0994856	24	15	674.226	0.0464132	0.9295	20	12	6637	0.0123425	0.0491654	22	13.475	5137.87	1947.34	0.379016	5295	4612	3386	4515	4372	4542	4580	4515	5895	6747	7406	6500	4173	4740	4767	5323	5085.5
2953	unknown3114	0.0210199	0.0632056	18	0	860.903	0.546753	1	25.5652	17.9999	3347	0.0628195	0.17732	21.7826	18.5597	3188.99	749.097	0.234901	4884	4712	2721	4335	2518	2798	2892	1963	2280	3612	2600	3468	3916	3647	2919	2906	3260.69
2954	unknown3115	0.00267199	0.0134688	18	0	1103.79	0.208683	1	24.2975	17.9999	6779.49	0.00473507	0.0233784	21.1488	18.408	5990.29	1467.64	0.245004	8441	9387	5311	7380	4739	5414	4694	4500	5069	5746	4993	5970	7909	7098	5564	6547	6172.62
2956	unknown3117	0.0144977	0.0475569	24	12	1143.57	0.193541	1	22.1053	12	5987.25	0.0192935	0.0699672	23.0526	12.0203	4855.43	1458.46	0.300377	4016	5381	3284	3580	6118	5758	4744	4088	4982	6827	5708	6432	4599	4081	3275	4114	4811.69
2962	unknown3122	0.0299489	0.0829149	24	0	1533.01	0.172816	0.982915	24.2975	6.63e-05	7588.24	0.0324192	0.10515	24.1488	3.3e-05	6264.62	1721.54	0.274803	8294	9132	5556	7371	5733	6373	4730	4551	5069	5502	5079	4868	8160	7586	5419	6679	6256.38
2963	unknown3123	0.00980952	0.0347873	18	9	1140.56	0.416871	1	20	6	5975.25	0.026578	0.0899044	19	7.6	4810.79	1036.98	0.215554	4101	3662	2685	3590	6721	6584	4536	6060	4467	3939	4813	4308	5012	5003	3942	4288	4606.94
2972	unknown3131	0.0210199	0.0632056	18	9	1995.81	0.628748	1	20	6.00002	13602	0.0703936	0.194971	19	7.60001	12082.2	1685	0.139461	9421	10204	9172	10655	13146	15246	11093	14923	12028	12420	13434	10039	11221	12357	9628	13029	11751
2973	unknown3132	0.00980952	0.0347873	24	0	1553.51	0.258761	1	23.1496	8.04e-05	7903.99	0.017708	0.0652202	23.5748	4.09e-05	6257.52	1992.62	0.318436	9663	9269	5146	7538	5979	7304	4493	6125	4598	4721	4274	4201	8938	6788	4696	6851	6286.5
2975	unknown3134	8.77e-05	0.00171035	24	12	1966.82	0.0299068	0.9295	23.1496	12	8175.25	3.63e-05	0.00162155	23.5748	12.0039	6208.22	2516.49	0.405348	4595	5642	3864	4223	7770	7574	6236	5977	7030	8446	8326	8899	4621	5279	4356	5940	6173.62
2982	unknown3140	0.00215962	0.0125857	24	21	1578.62	0.0822014	0.9295	23.7736	17.9999	5696.74	0.00171069	0.0116835	23.8868	19.4933	4664.78	1522.73	0.326432	6314	6983	3901	5450	3251	3787	3305	3350	3654	3868	4336	3769	5903	6323	4336	6225	4672.19
2985	unknown3143	0.0419656	0.10784	24	15	812.996	0.0706837	0.9295	20	12	6758.75	0.0202314	0.072759	22	13.475	5341.16	1790.85	0.335293	4706	5201	4230	4002	5574	5300	4654	4113	6723	7594	6552	6166	5025	5011	3971	5866	5293
2989	unknown3147	0.0144977	0.0475569	24	0	1167.26	0.1034	0.946907	24.0327	17.9999	5067.49	0.0112474	0.045643	24.0163	21.002	4338.11	1131.31	0.260784	5485	6611	3978	4750	3776	3835	3326	3072	3748	3558	3066	3921	5452	5516	4034	5268	4337.25
2991	unknown3149	0.00267199	0.0134688	24	21	2084.2	0.0786735	0.9295	24.9858	17.9999	8312.48	0.00199019	0.0128428	24.4929	19.5381	5962.76	2226.34	0.373374	6520	6363	4976	8076	5324	4956	3367	3501	3414	4474	5714	4737	9437	9519	6151	8143	5917
2996	unknown3153	0.0065055	0.0255615	18	9	1138.44	0.128206	0.963963	22.4427	5.99999	8284.5	0.00674675	0.0308484	20.2214	7.7584	7015.67	1438.46	0.205035	5698	7028	4335	5832	8561	9332	7427	7818	7894	7882	6717	6659	6776	6086	4424	6104	6785.81
2997	unknown3154	0.0065055	0.0255615	18	3	909.163	0.201435	1	20	7.97e-05	5158.49	0.0100083	0.0417495	19	1.58337	4187.49	1428.81	0.34121	4401	4896	4157	7180	4568	4536	3901	3394	2551	3003	2701	3706	5725	6391	4080	5687	4429.81
2998	unknown3155	0.0065055	0.0255615	24	12	2181.42	0.166416	0.980144	24.2975	12	7627.75	0.00847515	0.0364062	24.1488	12.0005	5680.67	2704.13	0.476024	2512	2857	2587	6000	9453	6598	5668	5853	6926	10010	7259	6316	3409	7095	4722	3837	5693.88
3008	unknown3164	0.000572095	0.00471842	18	0	1796.76	0.134419	0.965234	24.2975	17.9999	11558.2	0.00080538	0.0074356	21.1488	18.408	9652.82	3269.94	0.338755	13723	17637	8693	12822	6695	7864	7322	7072	8577	8908	7644	7755	13184	11836	8754	12459	10059.1
3018	unknown3173	0.00267199	0.0134688	24	0	8023.19	0.203828	1	24.1644	6.63e-05	26074.2	0.00463772	0.0229239	24.0822	3.3e-05	18683.8	9248.6	0.495005	24957	38586	14749	26005	16290	19842	12389	12332	11629	11493	10564	13127	28841	23737	14561	19445	18659.2
3028	unknown3182	0.00267199	0.0134688	24	12	2750.29	0.0721369	0.9295	24.0327	12	10795.2	0.00184155	0.0120817	24.0163	12	8759.42	3191.66	0.364369	6809	8252	6075	5117	11426	13168	8260	9286	11786	11739	11131	8525	6833	7864	6543	7364	8761.12
3029	unknown3183	0.0419656	0.10784	18	0	902.622	0.386528	1	24.5682	17.9999	5253.99	0.0830745	0.223702	21.2841	18.439	4717.57	1063.38	0.225408	6997	7456	3991	5327	3693	4815	4035	3313	4324	4955	3674	3895	6016	5518	4197	5285	4843.19
3042	unknown3195	0.0299489	0.0829149	24	9	1767.59	0.169617	0.981551	24.0327	6	7769.75	0.031914	0.103822	24.0163	7.50102	6531.34	1751.77	0.26821	5465	7262	4514	4672	9228	9013	7051	5787	6213	8410	7311	8699	5910	5231	4420	5335	6532.56
3051	unknown3202	0.0065055	0.0255615	24	21	432.396	0.27801	1	23.1496	17.9999	3415.75	0.0132302	0.0519625	23.5748	19.4792	3093.35	496.627	0.160547	3443	4362	2734	3243	2859	2665	2651	2378	2518	3084	2984	3057	3542	3601	3185	3335	3102.56
3061	unknown3211	0.000572095	0.00471842	24	12	9085.97	0.0161121	0.9295	20	12	47112	0.00011609	0.00275307	22	12.1	31373.5	16765.7	0.53439	21919	26137	19543	19495	24789	24938	32644	30602	48978	43854	50537	45079	21943	23240	26394	26058	30384.4
3066	unknown3216	0.000572095	0.00471842	24	0	4309.82	0.0299769	0.9295	24.7059	6.63e-05	8658.96	0.000205341	0.00370531	24.3529	3.27e-05	3985.84	5369.23	1.34707	8373	12719	6829	6715	710	714	676	672	677	595	495	746	5298	8791	5158	3651	3926.19
3070	unknown322	0.000987235	0.00692825	18	6	3008.03	0.114111	0.946907	20	6	8538.75	0.00113681	0.00901538	19	6.01667	4603.73	4088.32	0.888043	3035	447	2234	3477	4908	10062	9300	9885	1438	2772	2265	1494	4348	2883	2873	4312	4108.31
3071	unknown3220	0.0299489	0.0829149	18	9	1908.66	0.281974	1	20	6.00002	9943.75	0.0487621	0.144914	19	7.60001	8155.33	2060.67	0.252678	6572	7958	5859	4178	12025	11808	7571	8371	8146	9503	8283	7273	6342	8560	5969	5586	7750.25
3080	unknown3229	0.00267199	0.0134688	24	9	1880.9	0.0586627	0.9295	20	6	10617.2	0.00152998	0.0108426	22	7.425	8191.76	2150.13	0.262474	7385	8330	6295	5679	11886	11251	8784	10548	9453	7921	7836	7139	5773	7770	6038	6093	8011.31
3083	unknown3231	0.0210199	0.0632056	24	21	846.407	0.482674	1	23.9024	17.9999	4170.75	0.0567218	0.162545	23.9512	19.497	3741.76	1071.19	0.28628	4674	7001	3111	3930	2541	3178	2848	2560	3113	3220	3410	3635	4420	4114	3205	4944	3744
3084	unknown3232	0.0065055	0.0255615	24	9	1035.73	0.127207	0.963963	20	5.99999	6583.5	0.00670066	0.0307025	22	7.425	5226.69	1332.29	0.254901	4193	4814	4770	3108	7724	7291	5425	5894	6050	5165	5594	4549	3598	5026	4110	4527	5114.88
3096	unknown3243	0.000572095	0.00471842	18	0	790.192	0.128237	0.963963	24.2975	17.9999	4336.99	0.00077179	0.00724913	21.1488	18.408	3298.61	1661.23	0.503615	5439	7544	3152	4167	2120	2472	2020	2066	2622	2099	2634	2397	4774	5167	2705	4702	3505
3099	unknown3246	0.0419656	0.10784	18	3	753.422	0.640671	1	20	6.31e-05	4081.75	0.12411	0.309561	19	1.58336	3551	1114.41	0.313829	3849	5841	2952	3685	4150	4408	2839	2756	2373	2480	3194	2463	6429	5088	3495	3838	3740
3101	unknown3248	8.77e-05	0.00171035	18	9	4032.28	0.0203072	0.9295	23.9024	6.00001	13622.5	2.54e-05	0.00139602	20.9512	7.8674	10734.1	3726.05	0.347123	7416	7485	6213	6927	12618	15026	13647	13199	12030	13312	13001	10398	8466	9248	6462	8377	10239.1
3102	unknown3249	0.000572095	0.00471842	18	9	5896.56	0.0190034	0.9295	24.0327	6	19893.2	0.000135128	0.00300054	21.0163	7.87756	15803	5511.79	0.348781	10167	10518	9587	10508	18995	22637	19089	18852	17375	19897	19871	15695	12519	13340	10091	12215	15084.8
3110	unknown3256	0.000320124	0.00340574	18	0	949.644	0.0437177	0.9295	24.5682	17.9999	2143.74	0.000170416	0.00339187	21.2841	18.439	1503.74	1183.66	0.787142	3103	4144	2191	1980	666	972	766	598	823	814	835	830	1790	2681	2269	1835	1643.56
3114	unknown326	4.22e-05	0.00116331	18	6	2221.38	0.0531053	0.9295	20	6	4656.75	3.14e-05	0.00152669	19	6.01667	1871.42	2890.2	1.54439	445	34	251	356	4180	5782	5490	3175	79	198	207	88	1809	917	438	890	1521.19
3116	unknown3261	0.000572095	0.00471842	24	12	1986.62	0.0632897	0.9295	20.7529	12	10360	0.000406476	0.00505759	22.3765	12.0635	8002.54	2875.3	0.359298	6418	6999	5023	6478	8286	9354	7561	8123	9777	10893	12117	8653	7237	6200	4769	7881	7860.56
3119	unknown3264	0.000572095	0.00471842	24	12	2461.09	0.0504655	0.9295	23.1496	12	11868.5	0.00033065	0.00445769	23.5748	12.0039	9250.45	3405.75	0.368172	7114	8496	5937	7215	10289	11305	9256	10004	10706	12961	13677	10130	8039	7236	5753	9140	9203.62
3120	unknown3265	0.0299489	0.0829149	18	6	1331.48	0.744651	1	20	5.99998	6582.75	0.107116	0.273636	19	6.01666	5815.58	669.102	0.115053	4685	5264	5211	7027	8232	7180	6309	4610	2760	4076	4214	3485	9502	7909	6228	5060	5734.5
3134	unknown3278	0.0210199	0.0632056	18	9	1732.41	0.641287	1	20	6.00002	11416.5	0.0715313	0.197406	19	7.60001	10107.7	1463.29	0.14477	8583	8800	6886	8298	11952	12103	10665	10946	9896	11618	10535	8066	11064	10542	7333	9833	9820
3135	unknown3279	0.0065055	0.0255615	18	3	2370.93	0.111827	0.946907	23.7736	6.63e-05	13358.5	0.00598427	0.028319	20.8868	1.7406	9994.3	4639.96	0.464261	14078	18250	8928	12178	9390	10050	6775	6283	6163	6720	7714	6149	15806	15729	9150	12686	10378.1
3138	unknown3281	0.0419656	0.10784	24	12	487.904	0.306726	1	20	12	4752.25	0.0688997	0.191732	22	12.1	4070.49	758.323	0.186298	3836	4161	3017	3305	4045	4210	4492	3320	4085	5201	5149	4574	3719	3894	3006	4398	4025.75
3142	unknown3285	0.00421867	0.0189687	24	0	2859.89	0.0651793	0.9295	24.0327	6.63e-05	6605.23	0.00252941	0.0152539	24.0163	3.31e-05	4340.89	3777.93	0.870313	6200	9970	4385	5866	2657	2647	1994	1173	1770	2152	1825	2456	9239	7749	3711	5628	4338.88
3143	unknown3286	0.0065055	0.0255615	24	0	1950.2	0.050203	0.9295	24.0327	6.63e-05	4335.23	0.00294811	0.0167085	24.0163	3.31e-05	2963.36	2430.04	0.820027	4353	5753	3179	4056	1882	1914	1432	1010	1387	1592	1390	1581	6440	5045	2524	3855	2962.06
3144	unknown3287	0.0299489	0.0829149	18	15	2935.73	0.27438	1	20	12	10308.2	0.0476733	0.142461	19	13.6167	7427.86	3464.33	0.466396	7380	10562	4638	6013	5318	4982	4869	4339	9107	12875	10103	9148	7309	5544	5251	10871	7394.31
3149	unknown3291	0.00421867	0.0189687	24	0	3271.78	0.0259455	0.9295	24.0327	6.63e-05	7442.97	0.00110769	0.00888388	24.0163	3.31e-05	4816.2	3877.81	0.805161	7324	9967	5631	6850	3254	2908	2233	2292	2334	2213	2383	2445	8171	8264	4942	5815	4814.12
3150	unknown3292	0.0499351	0.128016	18	6	435.224	0.808777	1	20	6	4738.5	0.169997	0.390719	19	6.01667	4399.09	318.959	0.0725056	4390	4206	3793	4638	5054	5307	4109	4484	3480	3657	3913	4109	4794	5325	4195	4313	4360.44
3156	unknown3298	0.00215962	0.0125857	24	12	9266.99	0.0129479	0.9295	23.9024	12	19178.2	0.000321139	0.00445769	23.9512	12.0001	11223.5	11944	1.06419	4398	5046	3495	3715	17259	20502	15123	14955	17731	24719	18425	15838	5330	3495	3220	6021	11204.5
3161	unknown3301	0.00164724	0.00965163	24	21	1907.42	0.0387133	0.9295	23.9024	17.9999	6061.98	0.000679804	0.00661472	23.9512	19.497	4572.56	2215.31	0.48448	6242	7624	4860	5482	2877	3074	2811	2925	3468	2850	3622	3152	6100	8076	4907	5165	4577.19
3162	unknown3302	0.0144977	0.0475569	24	21	1081.87	0.172281	0.981551	24.0327	17.9999	4506.74	0.0174648	0.06469	24.0163	19.501	3672.4	1294.49	0.352492	4428	6274	3679	3866	2886	2874	2807	2349	2445	3150	2596	3363	6045	4693	3070	4219	3671.5
3167	unknown3307	0.0144977	0.0475569	24	12	670.16	0.127434	0.963963	20	12	5299.5	0.0134755	0.0527568	22	12.1	4268.52	1109.51	0.259928	3564	4745	3015	3027	4467	4230	3949	3763	4508	5826	5472	5392	3864	3952	3055	4420	4203.06
3168	unknown3308	0.0254844	0.0764709	24	21	1018.23	0.222903	1	23.7736	17.9999	3748.99	0.035053	0.111357	23.8868	19.4933	3082.86	1043.05	0.338339	3769	5141	2459	3843	2470	2403	2306	1749	1726	2712	2773	3060	4293	4317	2543	3843	3087.94
3176	unknown3315	0.00267199	0.0134688	24	21	930.376	0.0611794	0.9295	24.1644	17.9999	1900.74	0.00158875	0.0111316	24.0822	19.5053	1263.85	1171.76	0.927133	2312	3643	1316	1417	401	548	425	383	602	351	515	640	1741	2486	1615	1761	1259.75
3177	unknown3316	0.0210199	0.0632056	24	21	946.109	0.241452	1	23.52	17.9999	5270.74	0.03189	0.103822	23.76	19.4868	4494.91	1073.86	0.238906	5410	6864	4005	4372	3658	4133	3182	3281	4071	3923	3729	4386	5651	6164	4049	5219	4506.06
3179	unknown3318	0.0144977	0.0475569	18	3	529.093	0.237536	1	23.7736	6.63e-05	3798.5	0.0229738	0.0799651	20.8868	1.7406	3274.89	939.884	0.286997	4152	4519	2878	3645	3251	3480	2754	2413	2285	2542	2705	2903	4344	5071	3204	3496	3352.62
3190	unknown3328	0.000171384	0.00241724	18	6	7886.36	0.232106	1	20	6	32674.5	0.00044283	0.00526773	19	6.01667	24861.6	7731.86	0.310996	20366	22654	19066	22620	37799	33790	34224	24885	14094	20590	18445	14134	29712	27196	20412	22808	23924.7
3197	unknown3334	0.0299489	0.0829149	24	0	1044.75	0.202129	1	24.0327	6.63e-05	5403.24	0.0369697	0.115748	24.0163	3.31e-05	4503.1	1356	0.301126	4910	7044	4339	5320	4558	3645	3911	2865	2667	3920	3730	4267	5670	6215	4362	4615	4502.38
3200	unknown3337	0.000987235	0.00692825	18	9	8205.44	0.0239976	0.9295	23.52	6	33588	0.000276013	0.00416568	20.76	7.83796	26226	9181.9	0.350107	18914	18956	16964	17034	36322	39251	29556	29223	25704	33345	30514	28161	17232	20628	16846	20368	24938.6
3201	unknown3338	0.00164724	0.00965163	18	0	6437.85	0.0159516	0.9295	24.1644	17.9999	19341.2	0.000303407	0.00436462	21.0822	18.3931	13221	8534.53	0.645529	23600	25074	22535	16261	7341	8548	6822	9089	9842	7713	7280	7441	20528	22632	18453	15752	14306.9
3202	unknown3339	0.00164724	0.00965163	18	9	6413.64	0.0195143	0.9295	23.7736	6	23965.2	0.00036469	0.00468578	20.8868	7.85741	18589.2	6919.19	0.372216	13863	11927	12040	11440	26696	27671	20142	21352	19254	22451	22114	21386	11893	14131	12039	14043	17652.6
3203	unknown334	0.00164724	0.00965163	18	6	216561	0.330484	1	20	6	397091	0.00463592	0.0229239	19	6.01667	208036	200621	0.964357	174912	14450	14669	98777	354616	491357	330026	412366	50049	55291	31522	22067	367985	225063	102238	194205	183725
3209	unknown3345	0.000572095	0.00471842	24	12	1981.67	0.0333851	0.9295	23.2718	12	7251.75	0.000226631	0.00387044	23.6359	12.0029	5428.49	2452.56	0.451793	4112	5272	3369	3515	6860	6945	5685	5348	6410	8414	6952	7231	4088	3904	3532	4756	5399.56
3232	unknown3366	0.0499351	0.128016	18	3	327.037	0.286315	1	23.0287	6.63e-05	1989	0.0750272	0.205353	20.5144	1.70956	1724.05	447.392	0.259501	1559	2306	2015	2076	2027	1828	1260	1362	1263	1568	1359	1362	2255	2492	1684	1873	1768.06
3236	unknown337	0.000572095	0.00471842	18	6	8692.46	0.794701	1	20	5.99999	25215.5	0.00395358	0.0204978	19	6.01666	18664.1	6982.07	0.374091	16719	3446	17141	17034	27978	29318	20442	23124	8106	9790	15574	8140	23296	20701	18532	25747	17818
3241	unknown3374	0.0065055	0.0255615	18	6	1080.11	0.327084	1	20	5.99998	6118.75	0.0152197	0.0582683	19	6.01666	5064.47	1027.17	0.202819	4558	5590	3660	4712	7188	6445	5688	5154	3928	4384	4443	3313	5351	5408	4265	4953	4940
3243	unknown3376	0.0419656	0.10784	18	9	1042.28	0.49843	1	24.0327	6	5785.5	0.101807	0.262934	21.0163	7.87756	5090.66	1059.74	0.208174	3487	6251	3280	3598	7245	6526	5391	3980	4581	6633	5062	6480	4600	4472	3606	4049	4952.56
3245	unknown3378	0.0065055	0.0255615	18	0	1052.53	0.278458	1	20	18	7125	0.0132486	0.0519625	19	18.05	6134.04	1306.89	0.213056	8340	9615	5636	6889	5161	4813	4648	4843	5585	6248	5932	6478	7030	7293	5546	8631	6418
3247	unknown338	0.000320124	0.00340574	18	6	6466.85	0.8115	1	20	6	19152	0.00240445	0.0147052	19	6.01667	14281.1	5178.81	0.362633	12944	2782	13418	13009	21284	22609	15295	17420	6232	7401	12184	6500	17121	15847	14263	20148	13653.6
3248	unknown3380	0.000572095	0.00471842	18	3	17352.2	0.0655643	0.9295	20	6.63e-05	47220.2	0.00041976	0.00512404	19	1.58336	33893.6	21837.2	0.644286	51115	57442	36866	43458	42255	37842	36802	27234	11557	15484	14054	15380	69815	57025	42338	42886	37597.1
3250	unknown3382	0.0144977	0.0475569	18	15	1325.29	0.333775	1	20	12	6266.5	0.0306358	0.10064	19	13.6167	4889.32	1756.65	0.359283	4895	5406	4188	4853	3544	3900	3111	3404	5842	7403	6981	4840	4850	4083	3253	7404	4872.31
3258	unknown339	8.77e-05	0.00171035	18	6	4856.76	0.052995	0.9295	20	6	8402	6.17e-05	0.00208755	19	6.01667	3907.29	4651.97	1.19059	1845	288	1257	1909	7769	9331	8879	7629	650	1203	975	578	4349	2741	1394	2700	3343.56
3259	unknown3390	0.0419656	0.10784	18	6	1175.92	0.984049	1	20	6.00001	8001.25	0.172907	0.396339	19	6.01667	6615.81	1529.17	0.231139	5866	6474	4306	4810	10806	9518	5949	5732	4180	5360	6055	4049	8587	7825	6229	7142	6430.5
3260	unknown3391	8.77e-05	0.00171035	18	0	714.885	0.16271	0.980144	24.8451	17.9999	2221.49	0.000173463	0.00342966	21.4225	18.4714	1801.43	989.895	0.549505	2791	4851	2152	2204	1203	1267	1083	904	1302	1357	1157	1438	2165	2751	2199	1771	1912.19
3266	unknown3397	0.00980952	0.0347873	18	12	544.472	0.10068	0.946907	24.0327	12	5858	0.00782215	0.0344309	21.0163	12.2524	5047.32	1217.96	0.241309	4354	5373	3763	3741	6274	6322	5086	4768	5537	6642	5541	5712	4492	4187	3220	4230	4952.62
3268	unknown3399	0.000987235	0.00692825	18	0	3040.38	0.0196393	0.9295	24.1644	17.9999	6166.47	0.000229771	0.00387044	21.0822	18.3931	3377.16	3825.61	1.13279	7143	8400	8153	5052	742	980	782	1218	1695	835	997	1160	5252	8908	6391	4115	3863.94
3277	unknown3406	4.22e-05	0.00116331	18	6	1592.76	0.348272	1	20	6.00001	6865.5	0.000178167	0.00345947	19	6.01667	5491.94	1444.69	0.263056	4925	4379	3845	5051	7280	6750	6424	7008	3960	4192	4940	3343	5751	5745	5224	6253	5316.88
3278	unknown3407	0.0065055	0.0255615	24	0	3863.81	0.145809	0.966499	23.9024	6.63e-05	14856.7	0.00755107	0.0333975	23.9512	3.32e-05	11447.4	4751.86	0.415102	17387	19989	9002	13049	10718	10899	7753	9047	8757	7602	8158	7222	14916	14901	10540	13341	11455.1
3285	unknown3413	0.0210199	0.0632056	24	0	1425.17	0.379747	1	21.7778	7.27e-05	8946.24	0.0465407	0.139406	22.8889	3.82e-05	7511.16	1888.86	0.251474	11906	7362	6392	10125	6813	8092	6196	8147	6691	5159	5731	5364	9652	9002	6309	8463	7587.75
3288	unknown3416	0.0065055	0.0255615	18	12	263.397	0.122208	0.960364	24.0327	6	4660.5	0.00646922	0.0298632	21.0163	9.62892	4183.42	712.572	0.170332	3911	4065	3192	3121	5060	5467	4104	4011	4319	5242	4380	4441	3640	3712	3069	3655	4086.81
3293	unknown3420	0.0065055	0.0255615	24	0	5279.61	0.231854	1	20.6557	6.37e-05	28159	0.0113076	0.0457159	22.3279	3.44e-05	22447.5	6772.8	0.301717	34994	29546	17223	30873	23552	28255	17032	24285	16862	15001	15105	12805	31164	26490	17365	25539	22880.7
3298	unknown3425	0.0065055	0.0255615	18	0	1161.42	0.200395	1	24.4321	17.9999	4532.99	0.0099634	0.0416022	21.2161	18.4233	3517.93	1801.89	0.512202	5154	8907	3234	4756	2633	2385	2342	1581	2333	2675	2238	3411	5420	4989	3223	4500	3736.31
3300	unknown3427	0.0210199	0.0632056	24	0	2800.5	0.305242	1	24.5682	6.63e-05	10395.7	0.0388108	0.120036	24.2841	3.28e-05	7068.14	3850.27	0.544736	9707	18091	5659	8126	5337	5254	5060	3239	4307	4371	3872	6052	9923	8606	5951	8980	7033.44
3301	unknown3428	1.91e-05	0.000802606	18	6	4657.71	0.178046	0.990633	20	6.00001	14594.5	4.62e-05	0.00180232	19	6.01667	9935.57	4694.51	0.472495	7622	9428	6018	6850	16683	16325	11383	13987	5702	5054	6218	4460	10607	12399	7886	9245	9366.69
3305	unknown3431	0.000171384	0.00241724	18	6	15386.6	0.190776	0.994309	20	6.00001	49803.5	0.000370389	0.00474492	19	6.01667	33784.4	16341.1	0.483687	27018	31096	21584	19969	53341	58079	36240	51554	23591	17122	24645	13743	28394	42069	29096	31326	31804.2
3306	unknown3432	0.000320124	0.00340574	18	6	9915.76	0.243268	1	20	6	32864.2	0.000814612	0.0074889	19	6.01667	22962.6	10124.9	0.440928	17997	23123	14327	13879	32992	38832	24481	35152	16756	12010	16271	10550	20795	28856	20196	21554	21735.7
3307	unknown3433	0.000987235	0.00692825	24	0	4001.16	0.0350017	0.9295	23.6461	6.63e-05	15409.2	0.000389536	0.00488514	23.8231	3.34e-05	12002.1	4912.6	0.40931	15928	16665	13971	15073	9709	12331	8364	10611	10218	6823	8441	7641	15269	17162	12742	11550	12031.1
3308	unknown3434	0.00980952	0.0347873	18	6	6095.61	0.909354	1	20	6	30220.5	0.0510191	0.149569	19	6.01667	24780.5	6165.42	0.248801	20330	19404	18870	19587	28585	32345	24818	35134	23188	16587	24936	13804	22643	31368	26025	26910	24033.4
3309	unknown3435	0.0419656	0.10784	18	6	2893.83	0.999837	1	20	5.99999	16084.5	0.175013	0.399897	19	6.01666	14055.1	2532.63	0.180193	11841	10389	11120	11578	15076	17024	14541	17697	13636	10087	14871	8535	12957	18652	16194	15773	13748.2
3312	unknown3438	0.0144977	0.0475569	18	0	987.121	0.293514	1	24.2975	17.9999	8249.24	0.0274874	0.0923355	21.1488	18.408	7432.39	1427.63	0.192082	9014	11561	6987	8393	6696	6944	6022	5660	7034	7402	6514	6532	9031	9321	6862	7783	7609.75
3319	unknown3444	0.000987235	0.00692825	24	21	706.576	0.100425	0.946907	23.2718	17.9999	3560.74	0.00101314	0.00843635	23.6359	19.4815	2998.44	918.853	0.306444	3564	4798	3106	3226	1903	2585	2342	1829	2880	2536	2663	2533	3493	4340	3117	3293	3013
3320	unknown3445	0.0065055	0.0255615	24	21	2069.17	0.0466106	0.9295	24.0327	17.9999	8164.98	0.00275966	0.015869	24.0163	19.501	6439.03	2193.6	0.340672	7961	9074	7618	6096	4523	5883	4018	5305	5379	4601	4892	4990	8714	9786	7505	6655	6437.5
3321	unknown3446	0.0419656	0.10784	24	21	458.028	0.412375	1	20	17.9999	3927.5	0.0875096	0.233583	22	19.525	3562.4	487.033	0.136715	4126	5143	3254	3384	2773	3303	2597	2885	4011	3645	3470	3417	3499	4536	3539	4136	3607.38
3322	unknown3447	0.0299489	0.0829149	18	0	299.636	0.749046	1	25.7143	17.9999	1746.25	0.107617	0.27459	21.8571	18.5785	1688.75	378.849	0.224337	1712	3155	1957	1950	1377	1509	1630	882	1361	1771	1528	1763	1719	2155	1582	1529	1723.75
3323	unknown3448	0.0419656	0.10784	24	15	411.006	0.380223	1	20	12	5135.5	0.0819818	0.221172	22	13.475	4418.71	888.641	0.201109	3920	5127	3061	3771	4429	4115	4304	4032	4559	5714	5346	4923	4211	4498	3529	4778	4394.81
3325	unknown345	0.000320124	0.00340574	18	6	11980.9	0.103403	0.946907	20	6	33426	0.000374579	0.00477037	19	6.01667	12454.5	21687.9	1.74137	1785	51	314	1040	17017	56878	24831	34978	221	425	343	96	10938	2934	876	4495	9826.38
3331	unknown3455	0.000987235	0.00692825	24	21	454.846	0.160545	0.979097	23.9024	17.9999	2734.5	0.0015453	0.0109154	23.9512	19.497	2370.23	637.428	0.268931	2401	3895	2567	2526	2072	1981	1867	1553	1919	2148	1915	2163	2667	3260	2599	2412	2371.56
3332	unknown3456	0.00267199	0.0134688	18	9	18420.1	0.230898	1	20	6.00001	62876.2	0.00517672	0.025017	19	7.60001	42085.2	15891.6	0.377605	25159	24866	19362	22752	69966	73659	56650	51230	30107	34416	29530	29211	46750	43188	28461	38073	38961.2
3335	unknown3459	0.0299489	0.0829149	24	12	3343.2	0.10428	0.946907	24.0327	12	15324	0.02114	0.0752145	24.0163	12	12967.8	3954.21	0.304925	10828	14799	8323	9599	16526	18182	13524	12961	14417	16525	15035	15319	11342	10964	7947	11228	12969.9
3336	unknown346	0.000572095	0.00471842	18	6	2444.82	0.168244	0.980144	20	6	5892.75	0.000986437	0.00830986	19	6.01667	3690.68	2296.62	0.622274	2778	975	2224	3342	6533	5078	6231	5729	1384	2742	2202	1587	4451	3795	2279	3268	3412.38
3337	unknown3460	0.00421867	0.0189687	24	0	26925.4	0.08651	0.9295	22.4427	4.2e-05	82825.1	0.00325386	0.0179252	23.2214	2.17e-05	58664.7	32871.2	0.560323	90746	98928	58511	83116	59040	72710	33586	47236	39447	27563	25830	24819	101861	68958	48411	72370	59570.8
3344	unknown3467	0.000572095	0.00471842	24	12	2176.83	0.0296677	0.9295	22.7907	12	10382.2	0.0002034	0.00370531	23.3953	12.008	8136.93	2817.81	0.3463	6333	6980	5267	6812	9330	9786	8553	7465	9617	10723	11333	9856	6216	6584	6335	8125	8082.19
3352	unknown3474	0.000320124	0.00340574	18	6	2279.54	0.188853	0.994309	20	6	7702.25	0.000647705	0.00647724	19	6.01667	5405.3	2317.76	0.428793	4317	5710	3396	3443	8068	8843	5763	8135	3965	2831	4111	2526	4759	6448	4772	4904	5124.44
3354	unknown3476	0.000320124	0.00340574	18	6	20393	0.190223	0.994309	20	6	64400	0.000651963	0.00648833	19	6.01667	44098	20703.5	0.469488	34058	42900	27527	26616	67430	75215	49153	65802	30954	21460	30830	19444	40748	53718	37732	41839	41589.1
3355	unknown3477	4.22e-05	0.00116331	18	6	2932.37	0.153305	0.973332	20	6.00001	8289	8.37e-05	0.00237307	19	6.01667	5185.89	3188.52	0.614846	3882	3512	3127	3090	7380	9139	6382	10255	3255	1866	3453	1698	3594	5572	5080	5507	4799.5
3356	unknown3478	0.00164724	0.00965163	18	6	7172.71	0.41864	1	20	6.00001	33244.5	0.00570949	0.0271671	19	6.01667	26307.4	7279.35	0.276704	23993	21502	19831	21216	31266	36201	28299	37212	21781	16591	24032	15526	23773	29847	26157	29577	25425.2
3359	unknown3480	0.000572095	0.00471842	18	6	4070.81	0.523734	1	20	6.00001	19270.2	0.00273048	0.015764	19	6.01667	15660.5	3849.68	0.245821	14595	11914	12259	13242	18605	20321	16649	21506	13375	10657	14373	9775	14427	17546	16100	17760	15194
3364	unknown3485	0.00421867	0.0189687	24	21	3896.51	0.0941177	0.93685	23.9024	17.9999	11304.5	0.00350654	0.0188145	23.9512	19.497	8982.81	4335.56	0.482651	12302	17725	7498	11909	6461	6044	5277	4330	5140	6314	7177	8475	12579	12360	10641	9638	8991.88
3365	unknown3486	0.0065055	0.0255615	24	21	1837.42	0.0826693	0.9295	23.9024	17.9999	5423.49	0.0045864	0.0227742	23.9512	19.497	4181.39	1964.61	0.469845	5307	7573	3523	5821	3328	2976	2588	1841	2059	2947	3390	3921	6184	6224	4742	4544	4185.5
3374	unknown3494	0.0144977	0.0475569	24	9	4689	0.0637509	0.9295	24.0327	12	22144	0.0073815	0.0327814	24.0163	10.499	18589.2	5132.72	0.276113	13927	19407	13977	13275	24446	24797	19963	18593	19332	23847	21741	23656	15936	18104	13080	13403	18592.8
3384	unknown3502	0.000171384	0.00241724	18	0	397.748	0.183651	0.993547	24.8451	17.9999	958.747	0.000357754	0.00464887	21.4225	18.4714	734.413	507.421	0.690921	1236	2285	853	973	399	522	262	297	743	403	316	535	1090	1117	818	810	791.188
3392	unknown351	0.000572095	0.00471842	18	6	2113.37	0.236191	1	20	6	5421.5	0.00133898	0.010018	19	6.01667	3498.34	2004.49	0.572982	2825	887	2161	3312	5994	4587	5813	5292	1353	2651	2059	1503	4247	3968	2268	3167	3255.44
3398	unknown3515	0.00421867	0.0189687	24	21	1202.08	0.0680259	0.9295	24.0327	17.9999	2546.49	0.00262761	0.0155537	24.0163	19.501	1515.98	1320.28	0.870907	1597	2250	2988	2129	329	872	450	288	1333	564	234	1021	2128	3847	3021	1190	1515.06
3399	unknown3516	0.00267199	0.0134688	24	21	428.86	0.0676846	0.9295	23.9024	17.9999	1066.75	0.00173941	0.0117347	23.9512	19.497	722.806	451.287	0.624354	890	1019	1134	882	331	560	308	257	722	466	273	471	934	1571	1144	618	723.75
3400	unknown3517	0.00215962	0.0125857	24	21	55.8614	0.0672733	0.9295	24.1644	17.9999	120.5	0.00142914	0.0104337	24.0822	19.5053	68.9037	61.7817	0.896638	70	105	129	92	14	42	18	7	61	18	10	51	94	177	151	60	68.6875
3401	unknown3518	0.00267199	0.0134688	24	21	209.657	0.0702083	0.9295	23.9024	17.9999	419.248	0.0017974	0.0119184	23.9512	19.497	239.798	246.259	1.02695	269	313	623	359	31	108	57	20	194	62	27	105	355	646	481	195	240.312
3404	unknown3520	0.00267199	0.0134688	24	21	181.726	0.0620613	0.9295	23.9024	17.9999	326.499	0.00160928	0.011239	23.9512	19.497	201.85	191.477	0.948613	313	192	441	386	38	98	50	44	140	75	41	112	245	476	429	156	202.25
3405	unknown3521	0.000987235	0.00692825	18	0	668.039	0.287022	1	24.5682	17.9999	2822	0.00259806	0.0154315	21.2841	18.439	2457.06	828.595	0.33723	3185	5115	2611	2804	1838	1858	1763	1610	2033	2327	1743	2704	3068	2927	2562	2731	2554.94
3407	unknown3523	0.0065055	0.0255615	18	6	2076.6	0.209581	1	20	6.00001	9397.25	0.010359	0.0428409	19	6.01667	7216.39	2241.66	0.310634	5578	6537	5572	6216	10790	10062	8579	8158	5144	5919	5644	5181	8650	7679	5340	6067	6944.75
3409	unknown3525	0.0210199	0.0632056	24	0	846.053	0.257057	1	23.9024	4.69e-05	4873.25	0.0336126	0.107914	23.9512	2.35e-05	3917.89	1082.77	0.276365	5352	5965	3667	4509	3701	4692	2835	3781	3317	3177	2688	2603	5184	4378	2892	3973	3919.62
3420	unknown3535	0.0065055	0.0255615	18	12	1139.5	0.0734378	0.9295	23.2718	12	7477.75	0.00413082	0.0210677	20.6359	12.199	6143.58	1765.15	0.287315	4711	5726	4126	5148	7288	6622	7252	5429	6169	8990	7510	7242	4708	4812	4453	5655	5990.06
3421	unknown3536	0.00164724	0.00965163	24	12	1557.05	0.0360445	0.9295	22.9091	12	6609.25	0.000637182	0.0064098	23.4545	12.0065	4993.56	2113.76	0.423297	3610	4215	3324	4130	6012	5630	5960	4658	5545	8007	6485	6400	3784	3509	3597	4437	4956.44
3426	unknown3540	0.00980952	0.0347873	24	18	546.594	0.182613	0.993547	20.0911	17.9999	2379.75	0.0131212	0.0516692	22.0456	18.1426	1934.7	461.941	0.238767	1883	3035	1603	1660	1397	1235	1459	985	2363	2723	1651	2021	2050	2588	2388	2493	1970.88
3435	unknown3549	0.00267199	0.0134688	24	0	893.429	0.143421	0.966499	23.7736	6.63e-05	3627.99	0.00339797	0.0184376	23.8868	3.33e-05	2798.73	1056.78	0.377595	3578	4541	3198	3195	3139	2655	2249	2016	1931	2309	1666	1827	4073	3773	2377	2316	2802.69
3437	unknown3550	0.0144977	0.0475569	24	0	1768.3	0.427169	1	23.6461	6.04e-05	7910.24	0.0376802	0.117547	23.8231	3.04e-05	5879.74	2332.86	0.396762	7908	12411	4648	6674	6084	7545	4065	4437	4126	4196	3075	3703	8400	7302	4561	5161	5893.5
3442	unknown3555	0.00421867	0.0189687	18	0	778.171	0.187774	0.994309	25.5652	17.9999	1758.5	0.00644876	0.0298006	21.7826	18.5596	1553.37	788.839	0.507823	2381	3732	2578	1673	1126	1217	906	835	1921	917	869	873	2055	2212	1400	1367	1628.88
3447	unknown356	0.000320124	0.00340574	18	6	149911	0.274913	1	20	6	564878	0.000909819	0.00796759	19	6.01667	248900	327690	1.31655	102323	20692	59557	79634	230830	1010455	337808	680420	32635	43707	55557	16957	235547	97221	71795	271905	209190
3448	unknown3560	0.00980952	0.0347873	24	21	1477.85	0.199107	1	23.7736	17.9999	6846.74	0.0141375	0.054951	23.8868	19.4933	5834.6	1636.12	0.280417	7379	8881	5099	6635	4937	4877	4614	3639	3834	5854	5220	5125	7545	8263	5226	6353	5842.56
3454	unknown3566	0.00421867	0.0189687	24	0	2437.04	0.273492	1	24.8451	6.63e-05	10252	0.00895872	0.0380679	24.4225	3.26e-05	7079.82	3481.75	0.491785	9960	16179	6148	8721	6485	7494	4557	5125	4491	4947	3624	4328	10824	8204	4980	6475	7033.88
3467	unknown3578	0.000320124	0.00340574	24	12	11573.2	0.0543502	0.9295	23.6461	12	39328.5	0.000208074	0.00370531	23.8231	12.0007	27665.2	14819.6	0.535676	16931	19424	14276	16249	41272	35384	28450	23246	27173	49768	40056	40317	23053	24012	18182	23484	27579.8
3469	unknown358	0.000171384	0.00241724	18	6	37968.8	0.268809	1	20	6	135515	0.000506091	0.00567714	19	6.01667	60008.2	78355.1	1.30574	25280	6103	14907	17892	59050	241959	80189	160862	8133	11623	13958	4605	55711	23189	17883	66866	50513.1
3470	unknown3580	0.0210199	0.0632056	18	6	3441.14	0.365785	1	20	6	11684	0.0451176	0.136044	19	6.01667	7438.97	4545.18	0.610996	4069	6387	3748	3963	16692	12666	10909	6469	3833	6282	3633	6290	9823	7072	3890	4485	6888.19
3471	unknown3581	0.00421867	0.0189687	24	9	1007.63	0.088782	0.935067	23.0287	6.00002	5601.25	0.00332961	0.0181348	23.5144	7.47222	4564.34	1142.17	0.250238	3438	3863	3613	4028	6139	6450	4828	4988	4443	5584	4841	4943	4344	4575	3311	3263	4540.69
3478	unknown3588	0.00980952	0.0347873	24	12	997.197	0.267672	1	23.7736	12	4992.25	0.0182289	0.066721	23.8868	12.0003	4167.9	1190.67	0.285675	3395	5008	2916	3169	5481	5121	4227	3735	4317	5606	4548	5498	3709	3617	2560	3709	4163.5
3479	unknown3589	0.00267199	0.0134688	18	12	1610.44	0.0100311	0.9295	23.9024	12	9839.75	0.000308959	0.00441767	20.9512	12.2429	7490.38	3425.06	0.457261	4635	4712	4668	4968	9300	10035	8319	9515	8960	10635	9919	9845	4905	6195	4269	4617	7218.56
3480	unknown359	0.000572095	0.00471842	18	6	104605	0.1136	0.946907	20	6	271846	0.000691577	0.00669917	19	6.01667	115486	163489	1.41566	48464	4113	4259	22550	258374	378010	151160	299842	11719	12241	8583	4420	143456	79573	37009	67015	95674.2
3481	unknown3590	0.000171384	0.00241724	18	6	2360.32	0.252349	1	20	5.99998	9697.75	0.000477834	0.005516	19	6.01666	7354.95	2320.5	0.315502	6425	6153	6207	6098	10664	10678	7891	9558	4996	4566	5991	3661	9218	8264	5369	7441	7073.75
3482	unknown3591	0.00267199	0.0134688	18	6	1357.11	0.521398	1	20	6.00001	7866	0.0105549	0.043485	19	6.01667	6650.45	1174.49	0.176604	6671	5185	5833	6842	7796	7723	6773	9172	4868	5127	6383	4116	7919	6870	5276	7576	6508.12
3489	unknown3598	0.0210199	0.0632056	18	0	914.643	0.498917	1	24.1644	17.9999	4953.24	0.0582835	0.16625	21.0822	18.3931	4272.64	1327.57	0.310714	5161	9015	4160	4773	3483	3309	3652	2197	3387	4270	3287	4558	6046	5369	4097	4301	4441.56
3496	unknown3603	8.77e-05	0.00171035	18	0	3940.35	0.0939582	0.93685	24.5682	17.9999	12061	0.000104692	0.00260527	21.2841	18.439	8163.87	7149.64	0.875766	17429	26317	8503	12553	3472	3865	2831	3030	4542	3801	4913	4635	14969	11827	7319	14129	9008.44
3499	unknown3606	0.0065055	0.0255615	24	0	1630.77	0.317112	1	24.2975	6.63e-05	8802.48	0.0148196	0.0569377	24.1488	3.3e-05	6667.53	2472.93	0.370891	8296	13283	6351	7280	6837	7261	5311	4326	4979	5183	4022	4506	9072	8147	5459	6178	6655.69
3502	unknown3609	0.0299489	0.0829149	24	3	1533.36	0.340664	1	21.995	5.83e-05	9588.99	0.0569823	0.162968	22.9975	1.43737	8043.24	2202.14	0.273788	9550	11276	8070	9460	8778	9484	6675	7934	6578	6629	5650	5936	11543	9003	6097	6811	8092.12
3511	unknown3617	8.77e-05	0.00171035	24	0	751.301	0.0356107	0.9295	24.7059	6.63e-05	1610.24	4.27e-05	0.00177358	24.3529	3.27e-05	869.27	851.231	0.979247	1647	2095	1149	1550	403	476	402	208	401	375	196	320	1628	1411	780	716	859.812
3514	unknown362	0.000987235	0.00692825	18	6	3391.28	0.740588	1	20	5.99998	13622.2	0.00601059	0.0283815	19	6.01666	10872.4	2788.74	0.256498	9110	6491	10852	9965	13462	16589	10837	13601	5188	5912	10310	4881	13429	10757	11146	16021	10534.4
3517	unknown3622	0.0121536	0.0429944	24	0	1846.08	0.229388	1	24.8451	6.63e-05	8154.48	0.0191876	0.0696999	24.4225	3.26e-05	5850.45	2543.79	0.434804	7866	11892	6429	6431	5168	5244	4217	3216	4208	4667	3002	4742	8712	7654	5168	4454	5816.88
3529	unknown3633	0.0144977	0.0475569	24	0	1757.87	0.146008	0.966499	23.9024	6.63e-05	5918.74	0.0151516	0.0580588	23.9512	3.32e-05	4354.84	2122.2	0.487319	4251	8493	5902	5029	4602	4235	2896	2402	2712	2979	2392	3033	5955	6229	5159	3463	4358.25
3544	unknown3647	0.000572095	0.00471842	24	21	839.689	0.0802958	0.9295	24.2975	17.9999	2050.24	0.000504765	0.00567696	24.1488	19.5099	1263.22	877.059	0.694302	1174	2115	2001	1236	615	617	624	432	851	704	577	976	1812	2891	2501	997	1257.69
3546	unknown3649	0.00267199	0.0134688	24	0	3600.41	0.267882	1	23.2718	6.63e-05	13899.5	0.00589955	0.0279486	23.6359	3.37e-05	10004.4	5363.85	0.536148	11236	22138	11433	10791	10408	10511	7690	5923	6320	4772	4240	6977	15447	16555	8784	7908	10070.8
3547	unknown365	0.000320124	0.00340574	18	6	4638.62	0.778858	1	20	6	18141.2	0.00231796	0.0143383	19	6.01667	14371.1	3889.43	0.270643	12302	7990	13941	12719	17876	22207	14447	18035	6643	7982	13411	6416	17858	14391	14832	21346	13899.8
3551	unknown3653	0.0144977	0.0475569	18	12	642.053	0.207124	1	20	12	6644.25	0.0204439	0.0732529	19	12.0333	5819.18	916.23	0.15745	5669	5214	5341	5894	5090	5922	5364	5571	6335	7363	6670	6209	4753	5844	4904	5232	5710.94
3566	unknown3667	0.00267199	0.0134688	18	9	5208.55	0.0373772	0.9295	24.4321	12	22091.8	0.00101985	0.00847593	21.2161	10.5142	19199	4436.81	0.231096	14920	15059	12650	14319	24164	24974	19043	19305	22407	20877	22443	22640	15297	19545	14359	16926	18683
3571	unknown3671	0.0299489	0.0829149	18	9	2626.19	0.403437	1	22.9091	5.99999	14097	0.0654389	0.18322	20.4545	7.7922	10630.7	3894.28	0.366324	5734	12209	6664	5652	21876	15878	11224	7410	8989	14397	9169	13320	8394	7993	5820	5921	10040.6
3573	unknown3673	8.77e-05	0.00171035	18	6	4124.2	0.199024	1	20	6.00001	9723.75	0.000208662	0.00370531	19	6.01667	5866.53	3786.45	0.645432	3717	4848	4532	3287	11657	11692	6602	8944	1635	1586	1540	1342	7624	8668	4438	4411	5407.69
3574	unknown3674	0.0210199	0.0632056	18	9	1759.1	0.399399	1	20	6.00002	11632.5	0.0485256	0.144509	19	7.60001	8319.15	2534.11	0.304611	5091	8252	5047	4789	15164	14024	9696	7646	5749	7489	5975	7341	9461	8569	5316	5527	7821
3577	unknown3677	0.00421867	0.0189687	18	6	2183.55	0.152773	0.972802	20	6	8370	0.00537964	0.0257391	19	6.01667	5841.65	2658.48	0.45509	3731	5939	3864	3497	9734	9623	6253	7870	4648	4585	3652	3976	5145	5985	4925	4885	5519.5
3583	unknown3682	0.0144977	0.0475569	24	12	884.06	0.12979	0.963963	20	12	5388.75	0.0136902	0.0534523	22	12.1	3791.01	1690.01	0.445794	2194	3481	2815	2627	4667	3345	3705	2156	3820	6971	4896	5868	3129	3447	3299	2641	3691.31
3585	unknown3684	0.0065055	0.0255615	24	9	3392.88	0.10659	0.946907	23.6461	6.00001	10887.2	0.00573725	0.0272693	23.8231	7.48928	7987.69	3332.95	0.41726	4859	9038	5277	5337	13101	11509	11342	7597	7830	11055	6961	11778	6278	6501	4817	4120	7962.5
3603	unknown370	1.91e-05	0.000802606	18	6	59963.4	0.182943	0.993547	20	6	221270	4.74e-05	0.00181386	19	6.01667	88417	136936	1.54875	24056	3673	14839	18965	88017	374144	121040	301878	5626	8050	8975	2759	63021	26638	20571	66918	71823.1
3607	unknown372	2.89e-06	0.00035704	18	6	309631	0.140351	0.966171	20	6	798076	6.37e-06	0.000803812	19	6.01667	371451	440710	1.18646	208195	92594	72002	129656	666789	1186747	479501	859266	60211	75022	69546	29336	450259	233258	133267	343080	318046
3608	unknown373	8.88e-07	0.000240315	18	6	6851.86	0.19051	0.994309	20	6	25493.2	2.81e-06	0.000589942	19	6.01667	9542.54	16473.7	1.72635	1602	390	281	679	16504	49326	9809	26334	194	237	247	53	7843	2195	767	4279	7546.25
3609	unknown374	0.0121536	0.0429944	18	6	2739.51	0.994544	1	20	6	12824.2	0.0654601	0.18322	19	6.01667	6682.32	6735.37	1.00794	4204	710	194	1009	34234	8915	3531	4617	1387	662	194	335	15510	14725	2575	1056	5866.12
3610	unknown375	0.0299489	0.0829149	18	6	57643.3	0.294648	1	20	6	205632	0.0505659	0.148743	19	6.01667	135442	75792.4	0.559595	105025	62237	83881	88369	173331	283329	147460	218408	90482	103448	113864	62781	143345	97225	91630	155297	126257
3612	unknown377	0.00164724	0.00965163	18	6	49437	0.162688	0.980144	20	6	127050	0.00247206	0.0149707	19	6.01667	55022.7	74724.7	1.35807	31553	2530	3287	15308	72823	204130	86255	144990	9493	8129	7157	3302	69296	24019	13849	39360	45967.6
3614	unknown379	0.000987235	0.00692825	18	6	11816.8	0.404154	1	20	6	35280	0.00352175	0.0188494	19	6.01667	16307.7	19941.7	1.22284	10596	658	1271	3678	26072	61394	17204	36450	2683	1934	853	1033	30649	15184	6962	5638	13891.2
3617	unknown381	0.00980952	0.0347873	18	3	2660.49	0.15156	0.966499	22.5575	7.2e-05	13732	0.0111671	0.0454023	20.2788	1.68993	11164.6	4032.61	0.361196	16932	12270	10599	15127	9549	12541	7763	11649	7350	8107	10009	6663	16272	14134	10739	15949	11603.3
3618	unknown382	8.88e-07	0.000240315	18	6	132759	0.0819939	0.9295	20	6	384579	1.27e-06	0.000589942	19	6.01667	156721	234766	1.49799	51535	21649	20729	30235	332718	559365	198944	447290	12279	14449	12615	5570	139149	76524	40423	88874	128272
3622	unknown386	0.00164724	0.00965163	18	9	11401.4	0.110871	0.946907	23.52	6	50407.8	0.00175473	0.0117981	20.76	7.83796	40997.1	11571	0.282238	33685	27305	31351	29721	44896	56847	38657	61231	43437	43421	57571	34964	27708	32121	31631	35451	39374.8
3623	unknown387	0.000987235	0.00692825	18	9	13463	0.100255	0.946907	23.1496	6	59608.2	0.00101159	0.00843635	20.5748	7.81003	47634.7	14102.2	0.296048	38580	29585	35490	34919	52315	67578	46038	72502	50272	50631	64608	40030	32933	37146	35635	40695	45559.8
3630	unknown393	0.000171384	0.00241724	18	6	17829.3	0.323632	1	20	6	72955.5	0.000599012	0.00623491	19	6.01667	29863.8	44448	1.48836	11414	1647	4857	5666	32480	144135	26706	88501	3479	2378	1857	1082	33527	15063	8185	10664	24477.6
3631	unknown394	0.0419656	0.10784	18	6	213.193	0.968441	1	20	6.00001	1460.25	0.170814	0.392373	19	6.01667	726.338	741.355	1.02068	412	659	116	244	4441	566	366	468	192	161	175	112	789	1062	205	216	636.5
3632	unknown395	4.22e-05	0.00116331	18	6	91988.2	0.128979	0.963963	20	6	276340	7.14e-05	0.00223005	19	6.01667	112298	168434	1.49988	45298	17550	10007	24381	180771	465320	138077	321193	14022	12206	10685	4827	98121	47297	20120	60327	91887.6
3634	unknown397	4.22e-05	0.00116331	18	6	19785.9	0.279659	1	20	6	76138.5	0.000145654	0.00316458	19	6.01667	31603.3	46033.3	1.4566	12941	2252	4460	5815	42401	142923	29419	89811	3479	2492	1726	1149	39613	18322	9132	10464	26024.9
3635	unknown398	0.000987235	0.00692825	18	6	17982.1	0.264588	1	20	6	47832.5	0.00241625	0.0147565	19	6.01667	22120.5	26651.8	1.20484	17549	1137	1322	7306	40783	74964	25680	49903	3282	3294	1545	1000	37326	23826	4403	8934	18890.9
3636	unknown399	0.0210199	0.0632056	18	6	968.736	0.93508	1	20	6	4985.25	0.0968888	0.253492	19	6.01667	2440.76	2741.83	1.12335	1261	368	112	450	12462	3472	1441	2566	762	403	160	229	4205	4361	1056	428	2108.5
3639	unknown400	0.00980952	0.0347873	18	6	3829.34	0.308057	1	20	6	11161.5	0.0205545	0.0735547	19	6.01667	5354.52	6153.16	1.14915	3766	323	349	1354	13032	15895	5295	10424	1558	1378	395	570	8831	5764	3265	1543	4608.88
3641	unknown402	0.000572095	0.00471842	18	6	6490.18	0.219284	1	20	6	20227.5	0.00125245	0.00956458	19	6.01667	8702.61	11948	1.37292	3916	353	1324	2707	9998	35050	10960	24902	1832	1392	1078	769	10027	5024	3592	3152	7254.75
3642	unknown403	0.000572095	0.00471842	18	6	27849.6	0.19932	1	20	6	81839.8	0.00114931	0.00905748	19	6.01667	36723.3	46472	1.26546	27873	2640	3678	10688	63901	126136	41110	96212	5035	5439	3196	1488	54588	32511	6720	16254	31091.8
3649	unknown41	0.00421867	0.0189687	18	6	1603.01	0.569788	1	20	6	7633	0.0169001	0.0629392	19	6.01667	5709.33	2131.81	0.373391	4603	4935	3297	3493	8324	9076	5091	8041	4740	3800	4452	3898	5904	5321	5679	6562	5451
3656	unknown416	8.77e-05	0.00171035	18	6	8411.04	0.223719	1	20	6	28936.2	0.000232258	0.00387044	19	6.01667	12539.2	16935.5	1.35061	5301	1135	2742	4035	15960	49909	13134	36742	2614	1950	1506	1047	13776	7889	4984	5067	10486.9
3660	unknown42	0.0065055	0.0255615	18	6	2172.23	0.531735	1	20	6	10253	0.0230615	0.0802059	19	6.01667	7610.29	2896.35	0.380584	6009	6763	4512	4638	11213	11906	6647	11246	6204	5016	5875	4992	7741	7030	7579	8778	7259.31
3669	unknown428	0.0419656	0.10784	18	9	17477.2	0.573806	1	25.5652	12	149155	0.113812	0.288021	21.7826	10.5579	138923	13596.1	0.0978681	125634	109769	121988	120710	137203	159767	129213	158473	126137	150031	187227	133225	124696	133890	133585	150985	137658
3676	unknown434	0.0210199	0.0632056	18	6	1557.05	0.917239	1	20	6	6134.75	0.0954117	0.250535	19	6.01667	3117.1	3200.59	1.02679	2001	1215	88	781	14586	4686	2086	3181	955	560	221	252	5754	5468	922	912	2729.25
3680	unknown438	0.0419656	0.10784	18	6	3899.87	0.705285	1	20	6	8170	0.133783	0.326724	19	6.01667	5828.73	2286.75	0.392323	9171	1594	2571	4907	7405	9960	6575	8740	1757	2256	1862	1055	10109	8973	4159	7732	5551.62
3684	unknown441	0.000171384	0.00241724	18	6	22082.2	0.114547	0.946907	20	6.00001	51649.2	0.000232405	0.00387044	19	6.01667	24365.7	27841.1	1.14264	18896	3423	4537	12219	43962	61041	33474	68120	4424	4519	4501	2032	33360	18848	6410	16104	20991.9
3685	unknown442	0.000572095	0.00471842	18	6	2013.13	0.144848	0.966499	20	6.00001	4900.5	0.000861672	0.00771425	19	6.01667	2416.7	2537.11	1.04983	2073	439	520	1215	4299	6076	3161	6066	586	443	531	215	3506	2195	749	1674	2109.25
3689	unknown446	0.00164724	0.00965163	18	6	2147.66	0.155346	0.97563	20	6	12067	0.00237232	0.0146119	19	6.01667	10183.5	1976.74	0.194111	9641	8829	8511	9040	11883	12467	11525	12393	8570	8442	10763	7833	9285	10379	9575	9968	9944
3695	unknown451	0.000572095	0.00471842	18	6	3018.11	0.127412	0.963963	20	6	7839	0.000767295	0.00722259	19	6.01667	4037.3	3972.81	0.984027	2771	1073	1140	1924	6546	10507	5263	9040	1877	1587	1620	915	5002	2906	1623	3100	3555.88
3698	unknown454	0.00980952	0.0347873	24	12	4061.8	0.375102	1	24.2975	12	39718.8	0.0243034	0.0836517	24.1488	12.0004	35446	5220.46	0.147279	31788	28989	31914	30946	33929	40539	34069	39347	32842	42010	48249	35774	31075	32202	34764	39107	35471.5
3706	unknown461	0.000987235	0.00692825	18	6	3752.26	0.472005	1	20	6	8571.75	0.00404068	0.020804	19	6.01667	5246.53	3573.95	0.681203	4269	1316	2264	3133	8187	10858	7392	7850	2101	2694	2528	1454	8843	5657	3248	5221	4813.44
3713	unknown468	4.22e-05	0.00116331	18	6	9497.86	0.539315	1	20	6.00001	20145.2	0.000265951	0.00409811	19	6.01667	12114.6	8407.81	0.694022	11014	3208	4279	7681	22742	24205	17269	16365	2817	3225	3032	2099	23289	15729	7926	12652	11095.8
3714	unknown469	0.00980952	0.0347873	18	3	2088.44	0.208547	1	24.9858	6.63e-05	13449.5	0.014713	0.056679	21.4929	1.79111	11721.3	5782.6	0.493341	17799	13625	9465	12909	10305	13131	5320	8637	5673	8054	12609	6307	18673	18832	11638	20075	12065.8
3718	unknown472	0.00980952	0.0347873	18	6	1168.49	0.694923	1	20	6	3885.25	0.0408218	0.124944	19	6.01667	2884.98	1110.75	0.385012	2630	1027	1769	2710	3366	4691	3688	3796	1811	2679	2330	1704	3994	2762	2176	2873	2750.38
3721	unknown475	0.000320124	0.00340574	18	15	1327.59	0.467011	1	20	12	5245.5	0.00146634	0.0106174	19	13.6167	4140.67	1695.28	0.409422	5237	3841	3970	5438	2501	3336	2463	3103	4608	5739	6318	4317	3681	3595	3305	4536	4124.25
3724	unknown478	0.000572095	0.00471842	18	15	13693.3	0.580526	1	20	12	39571.5	0.00299237	0.016893	19	13.6167	27970.8	17064	0.610066	37639	24944	24256	45040	13980	18707	13838	18975	33051	43725	46649	34861	22148	24050	17827	25199	27805.6
3727	unknown480	0.000987235	0.00692825	18	15	74330	0.551114	1	20	12	238052	0.00463361	0.0229239	19	13.6167	173493	93449.6	0.538636	226842	141154	158959	263208	94914	121441	86682	131678	202359	259987	290113	199750	139155	149300	120070	175798	172588
3728	unknown481	0.000572095	0.00471842	18	15	49662.6	0.533538	1	20	12	150461	0.00277593	0.0159414	19	13.6167	110593	61207	0.553444	146377	102718	103962	166802	58577	75781	50855	80064	124716	162632	180704	133793	90256	95357	75554	111855	110000
3729	unknown482	0.0299489	0.0829149	24	9	2187.79	0.224045	1	23.9024	6	10917.5	0.0402874	0.123719	23.9512	7.49697	9325.96	2169.48	0.232628	7473	7829	8614	7360	12458	12133	8952	10127	10866	9906	12030	9676	5666	11262	6450	8341	9321.44
3734	unknown487	4.22e-05	0.00116331	18	15	1635.54	0.536513	1	20	12	5428.75	0.000264687	0.00409811	19	13.6167	4110.82	2169.03	0.52764	5136	4405	4242	6005	2280	2829	1780	3027	4695	6020	6289	4711	3204	3716	2910	4188	4089.81
3736	unknown489	0.0210199	0.0632056	18	15	1230.37	0.564295	1	20	12	4723	0.0644604	0.18089	19	13.6167	3726.64	1369.65	0.367529	4370	2093	4095	4993	2243	3231	2080	3161	3798	5356	5569	4169	3283	3295	3167	4511	3713.38
3737	unknown49	0.000987235	0.00692825	24	18	14207.5	0.0512599	0.9295	27.8233	17.9999	69859.4	0.000551168	0.00596682	25.9117	18.0985	51480.6	12238.7	0.237734	43111	50755	33219	42193	29001	45024	34594	44882	54651	47312	57728	51745	53259	80943	71213	74023	50853.3
3742	unknown494	0.000171384	0.00241724	18	15	36306	0.354185	1	20	12	106562	0.000650087	0.00648589	19	13.6167	71560	49062.3	0.68561	93433	56949	67680	108408	33068	44540	27341	44280	83717	118910	130473	93150	50834	61286	47341	75948	71084.9
3743	unknown495	0.000320124	0.00340574	18	15	5113.09	0.52337	1	20	12	15413.2	0.00162421	0.011325	19	13.6167	11237.6	6482.75	0.576881	14633	9968	11219	17119	4993	7504	5119	7851	11804	17337	19115	13397	8362	9750	7831	12795	11174.8
3749	unknown50	0.000987235	0.00692825	18	6	2665.79	0.283543	1	20	6	6976.5	0.00256997	0.0154127	19	6.01667	4507.74	2528.72	0.560973	3138	5313	1834	2004	6926	8550	5540	6890	1978	2324	2313	1964	6161	4518	3509	4259	4201.31
3752	unknown502	8.77e-05	0.00171035	18	15	11815.9	0.329734	1	20	12	30747.5	0.000331104	0.00445769	19	13.6167	20942.8	14614.8	0.697841	27317	18928	20636	31787	8531	11352	7388	12858	25540	35816	36452	25182	13987	17656	15404	23987	20801.3
3753	unknown503	8.77e-05	0.00171035	18	15	9250.37	0.277255	1	20	12	26207.2	0.000282622	0.00419093	19	13.6167	16816.9	12430.1	0.739141	21317	13450	15096	24833	7894	10045	6298	10323	20602	30556	30885	22786	11088	13718	11453	16801	16696.6
3754	unknown504	0.0299489	0.0829149	18	15	109522	0.321056	1	20	12	290937	0.0542725	0.157292	19	13.6167	192241	125541	0.65304	262819	145681	26908	312924	156216	30368	159857	19060	247273	336962	327601	251911	193159	206141	158700	220819	191025
3763	unknown512	1.91e-05	0.000802606	18	15	5000.31	0.191411	0.994309	20	12	12686.5	4.94e-05	0.00181386	19	13.6167	7818.34	6765.86	0.865383	9580	7082	7379	11802	2609	3486	1919	3635	9839	15459	14816	10632	5142	6402	5647	8616	7752.81
3770	unknown519	0.0419656	0.10784	18	15	14604.9	0.912853	1	20	12	62449.8	0.163274	0.379279	19	13.6167	47308.5	19054.6	0.402773	54385	27850	47455	72899	27499	45744	33301	42330	48646	71980	78114	51059	38554	37064	30620	46484	47124
3773	unknown521	0.0299489	0.0829149	18	15	3904.64	0.685016	1	20	12	20018.8	0.10025	0.259778	19	13.6167	14641.5	6223.87	0.425084	15751	9848	13323	21763	8904	13935	11267	12981	17462	20495	25172	16946	11600	11638	8962	13253	14581.2
3774	unknown522	0.000320124	0.00340574	18	15	2742.51	0.209395	1	20	12	6465.5	0.000711238	0.00685893	19	13.6167	4124.98	3502.56	0.84911	5537	4114	3653	6274	1114	1677	878	1704	4775	8382	7417	5288	2683	3894	3123	4944	4091.06
3777	unknown525	0.0419656	0.10784	18	15	851.18	0.703629	1	20	12	4521	0.133539	0.326679	19	13.6167	3603.94	1097.57	0.304548	4028	2282	3519	4745	2272	3484	2666	3405	3807	5016	5400	3861	3170	3051	2960	3827	3593.31
3784	unknown531	0.0419656	0.10784	24	15	425.855	0.498596	1	22.5575	12	4737.5	0.101834	0.262934	23.2788	13.4665	4237.1	598.019	0.141139	3964	4339	3724	3171	4139	4488	3234	4581	4579	4611	5168	4592	3702	3978	4567	4842	4229.94
3828	unknown571	0.0419656	0.10784	18	15	977.929	0.992101	1	20	12	7218.75	0.173982	0.398383	19	13.6167	6387.2	1331.13	0.208406	6973	8138	6164	6752	5362	6344	4528	6034	6961	7660	6534	7720	5156	5011	5842	6810	6374.31
3834	unknown577	8.77e-05	0.00171035	18	3	2184.96	0.0697686	0.9295	25.4179	6.63e-05	12674.7	7.96e-05	0.00235269	21.7089	1.80911	11352.3	6793.66	0.598437	16342	9900	11817	12640	8038	11509	7221	9310	7444	7450	8631	5294	18839	16537	15497	20831	11706.2
3835	unknown578	0.00421867	0.0189687	18	6	3200.72	0.738687	1	20	5.99998	8697.5	0.0211007	0.0751364	19	6.01666	5921.59	2911.74	0.491715	6378	2520	2395	4382	7855	10873	6807	9255	2466	2769	2766	1328	10955	7435	4073	6843	5568.75
3844	unknown586	0.00164724	0.00965163	18	6	2180.36	0.133987	0.964981	20	6	8078.75	0.00207879	0.0132538	19	6.01667	4488.87	3802.67	0.847132	2703	1519	2109	2396	6858	11382	4877	9198	1954	2691	2945	2127	4264	2977	2748	3701	4028.06
3845	unknown587	0.000572095	0.00471842	18	9	2806.86	0.0184787	0.9295	23.9024	6	8061.75	0.000131694	0.00296997	20.9512	7.8674	5915.61	2870.44	0.485232	3222	2240	3189	3843	7566	7975	7110	9596	7132	7555	7919	5980	3549	4742	3091	3839	5534.25
3851	unknown592	0.00164724	0.00965163	18	15	3378.56	0.178816	0.990633	20	12	23342.5	0.00268928	0.0157359	19	13.6167	20040.3	4465.31	0.222816	21488	16207	21098	22439	14127	16611	16725	18369	21389	23147	25999	22835	18283	19729	21356	20151	19997.1
3852	unknown593	0.0419656	0.10784	24	21	1363.3	0.0893955	0.935067	20	17.9999	7697	0.0247061	0.0849026	22	19.525	6262.04	1387.82	0.221624	7972	7995	5467	6616	2974	4459	3284	4675	5949	7769	7198	7097	6431	6141	8340	9876	6390.19
3853	unknown594	1.91e-05	0.000802606	18	3	53496.7	0.126952	0.963963	20	6.63e-05	149604	3.38e-05	0.00159391	19	1.58336	123160	87092.6	0.707151	192814	168403	105302	131898	119209	145684	120169	102789	40265	65109	67933	41118	238527	213120	215639	238904	137930
3855	unknown596	4.22e-05	0.00116331	18	3	1471.84	0.139681	0.965964	20	6.63e-05	4626.75	7.68e-05	0.0022946	19	1.58336	3924.66	2443.13	0.622507	5910	4835	3468	4294	3953	4475	4196	3489	1350	2422	2365	1511	7219	6349	6432	7156	4339
3861	unknown600	1.91e-05	0.000802606	18	3	49038.9	0.150147	0.966499	20	6.63e-05	138049	3.95e-05	0.00169133	19	1.58336	116083	81227.3	0.699733	179975	149265	99294	123663	114397	137129	123417	98522	39010	64311	57778	38804	218891	197822	199307	236157	129859
3862	unknown601	0.000572095	0.00471842	18	6	7949.29	0.176762	0.990633	20	6	17240	0.00103138	0.00853899	19	6.01667	10452.5	7407.75	0.708707	6134	4515	5333	4723	16071	19460	16635	16794	4233	5813	7323	5097	11307	8793	9322	11324	9554.81
3866	unknown605	0.0210199	0.0632056	18	6	2450.48	0.252292	1	20	5.99999	9354	0.0330887	0.106827	19	6.01666	6350.98	3296.61	0.519071	4523	2836	3847	4926	8588	12346	6650	9832	3668	5549	5326	4392	6933	5437	4501	5870	5951.5
3867	unknown606	0.0299489	0.0829149	18	0	1226.83	0.453576	1	20	17.9999	7701.74	0.0719803	0.198225	19	18.05	6537.45	1254.97	0.191966	9316	4938	7949	8810	5186	6391	4615	4849	5444	7698	7340	5619	9257	7528	6310	7712	6810.12
3873	unknown611	0.000987235	0.00692825	18	3	1980.43	0.18909	0.994309	20	6.63e-05	6088.25	0.00178951	0.0119184	19	1.58336	5290.05	2919.57	0.551898	7985	6242	4887	5239	5558	6581	5385	5159	2209	3301	3484	2062	8948	7624	7921	9978	5785.19
3874	unknown612	0.000320124	0.00340574	18	3	3071.32	0.212386	1	20	6.63e-05	9071.75	0.000720431	0.00690492	19	1.58336	8056.12	4679.95	0.580918	11478	9257	7436	8116	8814	10443	8580	7705	3006	5151	4685	2927	13881	11831	12928	15359	8849.81
3877	unknown615	0.00267199	0.0134688	18	6	2352.37	0.529968	1	20	5.99999	8980.75	0.0107053	0.0439375	19	6.01666	6369.55	2935.08	0.460798	4526	3064	4549	4069	8934	11177	6195	9617	3966	5104	6106	3134	5949	6135	6147	7550	6013.88
3878	unknown616	4.22e-05	0.00116331	18	6	4948.69	0.332543	1	20	6	17794	0.000170768	0.00339187	19	6.01667	13305.6	4617.61	0.347044	12527	10714	9174	9749	17577	21252	17141	15206	6174	10591	10130	7040	15145	13062	13219	15235	12746
3879	unknown617	0.000320124	0.00340574	18	6	351601	0.449712	1	20	5.99998	1082560	0.00141746	0.0104027	19	6.01666	792655	299310	0.377604	788328	622669	479585	527536	1125305	1268571	1019377	916987	340540	549879	557237	330907	1062168	794136	782030	936896	756384
3881	unknown619	0.000320124	0.00340574	18	6	15669.3	0.387412	1	20	6	43208	0.00123959	0.00951768	19	6.01667	30868.8	12811.1	0.415018	29690	21083	19004	21504	43912	49621	43611	35688	12738	22539	20992	13204	40421	29650	28654	36751	29316.4
3883	unknown620	4.22e-05	0.00116331	18	6	7228.4	0.437232	1	20	6.00001	26046	0.000219481	0.00380141	19	6.01667	19806.2	6492.19	0.327787	18853	15920	13340	14356	26330	30278	24367	23209	10051	15062	15545	9488	23599	21011	19813	23089	19019.4
3884	unknown621	0.000320124	0.00340574	18	6	13228.6	0.309427	1	20	6	28972	0.00101233	0.00843635	19	6.01667	17407.9	12716.5	0.730501	10610	5762	7778	7543	29183	33875	27718	25112	5725	8981	11370	6597	21065	15766	16524	20262	15866.9
3888	unknown625	0.00164724	0.00965163	18	3	5932.27	0.368665	1	20	5.99999	20693.8	0.00510511	0.0247815	19	4.43333	19515.9	7744.75	0.396843	24118	19925	14580	16854	21016	23789	20975	16995	8535	13010	12157	7968	29095	25744	26845	28999	19412.8
3890	unknown627	4.22e-05	0.00116331	18	6	7048.09	0.536319	1	20	5.99998	16861	0.0002646	0.00409811	19	6.01666	10714.9	6423.17	0.599464	10286	6620	4266	4479	16091	20674	18658	12021	2366	4397	3669	1872	18286	12257	10305	12737	9936.5
3891	unknown628	8.77e-05	0.00171035	18	6	347653	0.530226	1	20	5.99999	1034803	0.000510342	0.00571003	19	6.01666	767372	276802	0.360714	774813	601859	452413	507902	991195	1229837	1011544	906636	329408	491413	501351	284530	1047331	841671	812022	957348	733830
3892	unknown629	0.000987235	0.00692825	18	6	4619.53	0.490851	1	20	5.99999	15526.2	0.00418304	0.0212839	19	6.01666	12139	3417.41	0.281523	12589	10439	8617	8705	15249	17891	15595	13370	5752	8907	8727	5588	15236	12555	12402	15976	11724.9
3894	unknown630	1.91e-05	0.000802606	18	6	6679.33	0.460308	1	20	6	24420	0.000111101	0.0027331	19	6.01667	19024.5	5462.81	0.287146	19390	15982	13758	13751	23158	29285	23243	21994	9589	13568	14136	8390	22963	21738	19756	23099	18362.5
3895	unknown631	8.77e-05	0.00171035	18	6	14927.4	0.43583	1	20	5.99998	42420.8	0.000426979	0.00517695	19	6.01666	30536.3	12273.3	0.401926	30539	21276	18667	20706	42105	48037	45129	34412	12172	21013	19329	12174	41832	30845	30456	36092	29049
3899	unknown635	0.0210199	0.0632056	18	3	1526.47	0.930072	1	20	6	7778	0.096475	0.252714	19	4.43333	7096.95	2634.46	0.371211	7484	6380	4956	4971	7954	8641	7503	7014	4005	4860	5585	4367	9559	9397	9602	10712	7061.88
3902	unknown638	0.0144977	0.0475569	18	3	4970.78	0.621632	1	20	6.00001	14058	0.0514525	0.150533	19	4.43334	12701	6996.4	0.550857	15675	8412	8961	12324	15701	16770	11068	12693	5372	5417	5776	3859	23736	20774	13387	21800	12607.8
3905	unknown640	4.22e-05	0.00116331	18	6	8738.07	0.518471	1	20	6.00001	19171	0.000256534	0.00403925	19	6.01667	12856.8	6493.54	0.505066	13192	9759	5448	6086	18801	23422	19351	15110	2823	5284	4991	2331	20283	15687	13399	17152	12069.9
3906	unknown641	0.000320124	0.00340574	24	21	4516.11	0.0291835	0.9295	25.2722	17.9999	15930.4	0.000117536	0.00276592	24.6361	19.5517	10106	5231.05	0.517619	12737	9463	10691	11146	4826	7806	6097	6786	7193	6751	7529	4745	17015	14642	13063	19002	9968.25
3907	unknown642	4.22e-05	0.00116331	18	6	10731.9	0.501319	1	20	6.00001	34281.5	0.000248759	0.00398936	19	6.01667	25808.4	8684.22	0.336489	26122	19095	17785	17713	32783	41064	32974	30305	11726	16984	15919	9057	33620	30851	27815	32283	24756
3908	unknown643	0.000171384	0.00241724	18	6	7717.01	0.558945	1	20	5.99999	28638.5	0.000982208	0.00830657	19	6.01666	22598.3	6268.07	0.277369	22121	17712	17079	16632	25791	32574	28356	27833	11700	16774	17348	11048	27214	24227	23263	29748	21838.8
3909	unknown644	0.000171384	0.00241724	18	6	638845	0.540046	1	20	5.99998	2.02518e+06	0.000952181	0.00821304	19	6.01666	1.52038e+06	522162	0.343441	1540743	1155523	961078	1044385	1926241	2409196	1968457	1796820	671840	1022673	1022883	592630	2040627	1666554	1555278	1938794	1.45711e+06
3910	unknown645	4.22e-05	0.00116331	18	6	27192.1	0.564026	1	20	5.99998	61567.8	0.000277071	0.00416568	19	6.01666	40330.7	22331.3	0.553704	39373	23593	17206	18857	59243	74280	65175	47573	9236	17680	15732	7388	63747	50832	40669	51410	37624.6
3911	unknown646	0.000320124	0.00340574	18	6	12291.1	0.509041	1	20	5.99999	44707.2	0.00158427	0.0111316	19	6.01666	35887.7	8956.87	0.249581	37144	27785	27585	28680	45716	48804	42682	41627	18618	27018	28976	16912	43454	38337	37583	45916	34802.3
3913	unknown648	0.0144977	0.0475569	18	3	2644.23	0.133189	0.964981	20	6	7148.5	0.0139988	0.0544608	19	4.43333	6174.42	3017.8	0.488759	7324	6414	5740	6118	7200	8093	6423	6878	2014	2994	3160	2661	10155	7611	7790	7573	6134.25
3917	unknown651	0.0419656	0.10784	18	6	3807.95	0.789304	1	20	6.00001	11504	0.145993	0.348483	19	6.01667	10231.3	1146.09	0.112018	13696	6930	6930	9461	11901	13836	9767	10512	4709	4011	3810	3803	19963	18430	5820	17900	10092.4
3922	unknown656	0.00164724	0.00965163	18	6	5354.21	0.851592	1	20	6	18792.2	0.010618	0.043662	19	6.01667	14145.2	5354.8	0.378559	11179	6359	10195	9733	18497	22002	16120	18550	7820	11921	11083	8150	18461	16887	13102	15882	13496.3
3923	unknown657	4.22e-05	0.00116331	18	6	2860.6	0.421057	1	20	5.99998	8505.75	0.000212031	0.00373209	19	6.01666	6081.83	2462.96	0.404969	6098	4146	3832	4422	7791	9970	9149	7113	2375	3732	3759	2245	8413	6439	5064	7986	5783.38
3924	unknown658	0.000446109	0.00471842	18	6	247.487	0.506519	1	20	6	735.5	0.00212295	0.0134195	19	6.01667	511.62	245.465	0.47978	461	205	322	322	742	889	672	639	244	405	357	249	639	578	466	520	481.875
3925	unknown659	0.000572095	0.00471842	18	6	75117.5	0.492769	1	20	6.00001	239742	0.00258622	0.0154306	19	6.01667	172214	71469.1	0.415002	169604	121899	99094	104489	257911	282982	230110	187965	81531	127051	122906	70906	215723	179698	165652	199331	163553
3930	unknown663	0.000320124	0.00340574	24	0	1825.22	0.0241886	0.9295	23.7736	6.63e-05	4019.49	9.89e-05	0.00251725	23.8868	3.33e-05	2687.42	2255.98	0.839462	4786	5282	2833	3177	2034	2073	1370	1360	1184	903	1052	1325	3714	4513	3573	3955	2695.88
3933	unknown666	0.00421867	0.0189687	18	6	5826.56	0.0691784	0.9295	20	6	13336.2	0.00266722	0.0156808	19	6.01667	7343.52	6422.92	0.874639	3111	2492	4162	3147	12711	13882	11126	15626	2895	4235	4756	3698	6125	6510	6289	4278	6565.19
3934	unknown667	7.77e-06	0.000473861	18	3	171736	0.0275235	0.9295	23.1496	5.81e-05	524352	3.5e-06	0.000631147	20.5748	1.71459	373498	293195	0.784999	644434	557682	397025	498270	318348	375865	258688	293981	128789	171129	184032	137197	679505	611283	575505	593501	401577
3935	unknown668	8.77e-05	0.00171035	18	6	18715.7	0.588273	1	20	6	53791.8	0.000560854	0.00596682	19	6.01667	37848.6	17053	0.450557	35731	17936	23454	24646	48138	61522	59930	45577	15721	22729	23762	13014	48049	41469	39872	50964	35782.1
3936	unknown669	7.77e-06	0.000473861	18	3	4990.58	0.0208306	0.9295	23.3952	6.63e-05	16664.5	2.69e-06	0.000589942	20.6976	1.72483	12048.1	8479.01	0.703763	20006	17014	13660	15978	9816	11868	8466	9202	4961	6183	6818	5479	20607	18608	17505	18882	12815.8
3943	unknown675	1.91e-05	0.000802606	18	3	116259	0.0387711	0.9295	23.2718	6.34e-05	354993	1.12e-05	0.000988775	20.6359	1.71969	260452	213909	0.821301	448151	380029	260857	330939	222386	271722	187582	202887	82976	115809	122517	87941	491395	437771	400644	442454	280379
3944	unknown676	2.89e-06	0.00035704	18	3	3708.6	0.031329	0.9295	23.1496	5.68e-05	11693.5	1.56e-06	0.000589942	20.5748	1.71459	8747.54	6373.59	0.728616	14208	12071	9626	10869	7660	9040	6512	7014	3303	4490	4708	3546	14973	14192	13068	14447	9357.94
3945	unknown677	0.00980952	0.0347873	18	15	4597.79	0.260393	1	20	12	19640	0.0178036	0.0654412	19	13.6167	15174.2	6012.26	0.396215	19920	12148	14686	14933	9510	11500	8206	11856	18913	20469	25713	13465	13115	15487	14239	17696	15116
3949	unknown680	0.0299489	0.0829149	18	3	927.017	0.551865	1	26.9725	6.63e-05	18826.2	0.0843364	0.226818	22.4862	1.87388	19207.5	5938.83	0.309193	23247	18150	16079	17829	18134	21857	13847	17986	14496	16831	22073	10023	25048	22768	24180	27510	19378.6
3952	unknown683	0.000320124	0.00340574	18	3	1358.18	0.157342	0.97563	24.2975	6.63e-05	8599.99	0.000548828	0.00596682	21.1488	1.76243	7530.12	2974.43	0.395005	10016	10158	5844	8382	7228	8372	5514	5764	4539	5355	7094	5031	10779	10131	8583	11134	7745.25
3953	unknown684	2.89e-06	0.00035704	18	3	3568.77	0.038681	0.9295	20	7.15e-05	11665.7	1.9e-06	0.000589942	19	1.58337	8724.21	5407.64	0.619843	14146	11310	10260	10947	8153	9686	6580	7582	3813	5258	5214	3758	14961	13592	13490	15511	9641.31
3954	unknown685	0.0419656	0.10784	18	6	2847.87	0.165494	0.980144	20	5.99998	13016	0.04146	0.126513	19	6.01666	11128	1315.99	0.11826	13612	13560	9332	10192	13927	16117	10505	11515	4760	6837	7045	5620	15988	12837	11543	12106	10968.5
3956	unknown687	2.89e-06	0.00035704	18	3	132957	0.0468463	0.9295	20	4.72e-05	399900	2.27e-06	0.000589942	19	1.58336	296271	206952	0.698523	491189	411766	316758	379889	284565	343509	227205	253541	110948	154595	158134	105216	549116	481648	502754	531061	331368
3958	unknown689	0.000171384	0.00241724	18	3	5899.39	0.138763	0.965964	20	6.63e-05	12805.2	0.000276977	0.00416568	19	1.58336	9553.37	8241.78	0.86271	18055	14584	7906	10676	10914	13002	7392	8703	2176	2670	3184	2234	23861	18780	15473	15608	10951.1
3959	unknown69	0.0419656	0.10784	18	9	2839.21	0.233764	1	20	6.00001	12761	0.0551751	0.158967	19	7.60001	9253.9	2934.7	0.317132	5115	4335	9611	7043	12311	11137	14791	12805	4183	11032	8830	7549	6888	5425	8400	9377	8677
3963	unknown693	0.0144977	0.0475569	18	6	18224.6	0.61118	1	20	6.00001	52290.5	0.0507376	0.148958	19	6.01667	41244.9	9551.97	0.231592	51178	44412	27105	29871	52854	72762	40409	43137	10670	12048	16307	12339	94755	50871	39595	43085	40087.4
3964	unknown694	0.000572095	0.00471842	18	6	9243.3	0.242477	1	20	6.00001	48345	0.00137098	0.0101374	19	6.01667	41507.9	5787.31	0.139427	45211	40890	36219	39595	48307	57208	42385	45480	21578	29773	30725	24953	57042	46249	42082	45208	40806.6
3965	unknown695	0.000987235	0.00692825	18	6	1558.82	0.260996	1	20	6	7146.25	0.00238697	0.0146267	19	6.01667	5967.07	1048.64	0.175737	6657	5693	5030	5344	7211	8648	6652	6074	3115	4298	4411	3578	7774	6212	6057	6686	5840
3966	unknown696	0.0144977	0.0475569	18	6	1407.14	0.158174	0.97563	20	6.00001	9966.75	0.0162306	0.0611384	19	6.01667	8900.98	821.927	0.0923412	9169	8984	8880	9141	10713	11231	8772	9151	5232	7646	7840	6238	10212	9017	8892	9704	8801.38
3967	unknown697	8.77e-05	0.00171035	18	6	8006.92	0.122148	0.960364	20	6	28627.5	0.000133292	0.00299043	19	6.01667	19795.5	8664.12	0.437682	18249	15517	13906	16174	24541	33805	24906	31258	9561	10573	14539	9739	18197	19091	15127	24746	18745.6
3968	unknown698	0.0210199	0.0632056	18	6	2474.52	0.339815	1	20	6.00001	8767.5	0.0424404	0.12914	19	6.01667	7217.07	1266.75	0.175522	8267	7994	5711	5936	9451	11059	6925	7635	1936	3441	3519	2430	13003	10109	7398	8203	7063.56
3970	unknown7	0.0210199	0.0632056	24	3	572.933	0.113115	0.946907	20	5.01e-05	6783.25	0.0167426	0.0625269	22	1.37503	6291.87	802.091	0.127481	6988	7284	6317	6544	6507	7421	5853	6873	5555	5403	5264	5677	6566	6471	6824	5805	6334.5
3972	unknown700	0.000320124	0.00340574	18	6	623775	0.265723	1	20	6	2.40344e+06	0.000882298	0.00780985	19	6.01667	1.95561e+06	394970	0.201967	2201327	1926645	1481324	1776803	2402386	2890128	2034048	2287200	859355	1187195	1291824	970302	2854963	2260104	2029439	2070996	1.90775e+06
3975	unknown703	0.0419656	0.10784	18	6	2832.85	0.922349	1	20	6	16748.2	0.164572	0.381271	19	6.01667	14546.1	2180.81	0.149924	13087	11443	12211	15627	22824	15208	12091	16870	7109	13182	7853	10714	18702	22835	14076	14677	14281.8
3980	unknown708	0.00421867	0.0189687	18	15	5476.37	0.355888	1	20	12	25796	0.0112624	0.0456611	19	13.6167	20224.6	7201.71	0.356088	25102	16678	18173	22975	15054	16434	13756	15359	22078	28115	32211	20780	16833	17558	18366	23005	20154.8
3984	unknown711	0.0065055	0.0255615	18	6	1377.09	0.121335	0.960278	20	6.00001	8305.75	0.00642866	0.0297712	19	6.01667	7164.14	878.983	0.122692	8207	6937	6778	7458	8347	9615	7332	7929	3618	5622	5962	4771	7739	6712	7239	8656	7057.62
3985	unknown712	0.000987235	0.00692825	18	6	9275.3	0.302314	1	20	6	41698.5	0.00272098	0.015764	19	6.01667	34453.9	6590.79	0.191293	37408	32515	26904	31642	42972	49899	35079	38844	15916	25575	23264	19544	45763	37300	36408	39450	33655.2
3986	unknown713	0.000987235	0.00692825	18	6	3264.71	0.209643	1	20	6	12424.5	0.00196266	0.012703	19	6.01667	9910.88	2233.81	0.22539	11762	9433	7796	8345	13325	14557	10739	11077	3946	6422	6578	5338	12983	11184	9796	10962	9640.19
3987	unknown714	0.00267199	0.0134688	18	6	2578.82	0.474904	1	20	6	7848.75	0.00973223	0.0407944	19	6.01667	5535.81	2359.1	0.426152	4575	3099	4848	4264	8664	8402	5741	8588	2482	3106	4553	2409	4284	4573	5268	9143	5249.94
3989	unknown716	0.00267199	0.0134688	18	15	3060.71	0.20923	1	20	12	23054	0.004746	0.0234057	19	13.6167	18367.1	5047.33	0.274802	19037	11853	18477	19753	13743	17826	11490	17280	21203	24356	27072	19585	16908	17969	17816	18724	18318.2
3994	unknown720	0.00421867	0.0189687	18	6	10493.5	0.543886	1	20	6	26984.8	0.0162386	0.0611384	19	6.01667	20433.2	6116.12	0.299323	24061	21101	11185	13132	28867	35943	20605	22524	4083	7167	7327	4648	40463	28184	21689	24093	19692
3995	unknown721	0.00164724	0.00965163	18	6	20942.7	0.342139	1	20	6	86354.8	0.00477987	0.0235246	19	6.01667	70581.2	14259.9	0.202035	79744	66865	55854	57995	85220	106964	70012	83223	30565	43090	43953	30828	102370	86060	74995	83913	68853.2
3996	unknown722	0.00164724	0.00965163	18	15	1532.65	0.104888	0.946907	20	12	7677.75	0.00166963	0.0114936	19	13.6167	5704.08	2144.03	0.375877	6290	3225	5155	6345	3842	4649	3628	5001	6825	8595	8483	6808	5097	5829	4962	6199	5683.31
3997	unknown723	0.00421867	0.0189687	18	6	33996.6	0.513203	1	20	6	94127	0.0154482	0.0588773	19	6.01667	70006.7	22834.6	0.326178	85015	62131	38203	47222	104063	122817	70867	78761	15324	23591	24735	14143	130229	100179	74060	84493	67239.6
3998	unknown724	0.000572095	0.00471842	18	6	14584.1	0.234777	1	20	6	62680.8	0.00133177	0.010008	19	6.01667	52741.1	8684.53	0.164664	58262	50390	44673	48809	64574	72378	51121	62650	26924	38628	38926	26660	66870	56730	57475	61949	51688.7
3999	unknown725	0.000320124	0.00340574	18	6	690542	0.327712	1	20	6	2.49112e+06	0.00106613	0.00871641	19	6.01667	2.02768e+06	423650	0.208933	2321598	1810713	1556688	1741331	2555260	2951032	2044925	2413274	888339	1252864	1309693	898890	2880986	2407020	2204959	2383889	1.97634e+06
4000	unknown726	0.000320124	0.00340574	18	6	2105.76	0.237421	1	20	6	9239.75	0.000796883	0.00737288	19	6.01667	7636.84	1445.92	0.189335	7966	6996	6589	7165	9715	10505	7734	9005	3754	5258	6141	3953	9789	7830	8278	8708	7461.62
4001	unknown727	0.00421867	0.0189687	18	6	4543.51	0.31737	1	20	6	13504.5	0.0101968	0.0422913	19	6.01667	10273.8	2925.91	0.284793	12372	8442	7054	8715	14895	16854	10805	11464	2921	3957	4672	2372	16437	14046	11898	11804	9919.25
4002	unknown728	0.00267199	0.0134688	18	6	2396.03	0.0964747	0.945467	20	6.00001	13565.2	0.00238792	0.0146267	19	6.01667	11755.3	1398.62	0.118978	13863	10914	11027	12087	13460	15224	12426	13151	6564	9121	9257	7022	13138	11776	13149	13194	11585.8
4004	unknown73	0.0144977	0.0475569	18	6	22313.5	0.662338	1	20	6	118233	0.0542126	0.157228	19	6.01667	87960.8	32027.5	0.364111	79789	64422	64671	59795	105276	151146	70818	145693	64823	54218	85774	40708	76175	83343	94797	103828	84079.8
4006	unknown731	0.0144977	0.0475569	24	21	635.689	0.0873472	0.931721	27.6489	17.9999	3912.99	0.00971485	0.040761	25.8245	19.7043	2693.06	757.151	0.281149	2623	2257	2196	2185	2097	2465	1893	1618	2508	1865	3233	1638	3364	4214	4538	3536	2639.38
4010	unknown735	0.000572095	0.00471842	24	0	1579.68	0.0877927	0.931721	24.5682	6.63e-05	6530.23	0.000547409	0.00596682	24.2841	3.28e-05	4578.61	2244.77	0.490273	7418	8792	4297	5614	3295	3455	2424	3573	3168	3052	3375	3129	5265	5256	4167	6654	4558.38
4013	unknown738	0.00267199	0.0134688	18	15	58026.6	0.157294	0.97563	20	12	248812	0.00368786	0.0194975	19	13.6167	194083	75675.1	0.389911	228492	154555	180020	240986	116189	155281	107784	153053	216804	267136	290326	220982	174561	195281	180885	211267	193350
4014	unknown739	0.0065055	0.0255615	18	15	1616.09	0.197231	1	20	12	6837.25	0.0098265	0.0411497	19	13.6167	5196.16	2087.97	0.40183	4422	4286	5283	6885	3158	3589	3538	4293	5491	7494	7757	6607	3635	5640	4864	5873	5175.94
4017	unknown741	0.0144977	0.0475569	18	6	3308.2	0.513	1	20	6	12191.8	0.0438895	0.132989	19	6.01667	9291.73	3411.61	0.367167	6931	6082	5130	6875	13244	13212	12305	10006	5246	8527	8540	8613	8289	9808	9920	9325	8878.31
4020	unknown744	0.000572095	0.00471842	18	15	14165.1	0.144962	0.966499	20	12	56194.5	0.000862286	0.00771425	19	13.6167	43919.9	18186	0.414072	51871	39240	41648	55082	23176	33172	24657	33662	47482	59907	65107	52282	37729	45843	40866	48176	43743.8
4022	unknown746	8.77e-05	0.00171035	18	6	14258.1	0.563952	1	20	5.99997	50763.8	0.000539754	0.00593181	19	6.01665	38184	13081.1	0.342579	35820	30756	25349	26286	53949	62892	40578	45636	19055	24453	27977	17312	51738	44356	37204	42221	36598.9
4023	unknown747	0.0065055	0.0255615	18	0	857.367	0.11481	0.946907	20	17.9999	3421.75	0.00612422	0.0287613	19	18.05	2822.07	819.789	0.290492	3875	3806	2787	4475	1741	2012	1524	1741	2680	2576	3018	4081	3241	3941	3245	3260	3000.19
4024	unknown748	0.00267199	0.0134688	18	15	1024.6	0.166466	0.980144	20	12	3786	0.00387768	0.0203174	19	13.6167	3103.32	1188.3	0.382912	3663	3264	2995	3906	1640	2354	1635	2326	3257	4017	4444	3426	2572	3372	2958	3640	3091.81
4028	unknown751	0.0210199	0.0632056	18	15	922.774	0.273571	1	20	12	7023.75	0.0354138	0.111928	19	13.6167	5742.55	1450.35	0.252563	6532	4147	5427	6026	4518	5134	4091	5278	6172	8265	7856	5802	5072	5498	5976	5862	5728.5
4029	unknown752	0.00421867	0.0189687	18	15	36911.2	0.124527	0.963963	20	12	136266	0.00449242	0.0224104	19	13.6167	106852	41729.4	0.390536	126339	86029	94415	134273	66907	80733	60304	75329	107368	152625	151122	133951	98812	111561	99264	124128	106448
4030	unknown753	0.00980952	0.0347873	18	15	888.126	0.199402	1	20	12	3964.25	0.0141555	0.0549717	19	13.6167	3269.31	1025.96	0.313816	3744	2718	3034	4044	2074	2619	2055	2651	2996	4440	4415	4006	2880	3332	3329	3813	3259.38
4031	unknown754	0.00164724	0.00965163	18	15	52765	0.0692307	0.9295	20	12	249067	0.0011494	0.00905748	19	13.6167	193690	69294.8	0.357761	200046	141185	189618	227127	124162	157122	116260	157223	221921	264828	274272	235246	174409	207826	188798	208265	193019
4032	unknown755	0.000987235	0.00692825	18	6	5358.63	0.595605	1	20	6	17053	0.00496202	0.0241954	19	6.01667	13376.2	3697.26	0.276407	14099	10039	9479	10040	17977	21464	13062	15709	5403	7542	7705	4645	19320	16724	15643	17999	12928.1
4034	unknown757	0.0065055	0.0255615	18	15	3100.66	0.202372	1	20	12	10402.2	0.0100488	0.0418065	19	13.6167	8421.85	3379.51	0.401279	10467	7881	8084	11102	4938	6205	4324	5724	7814	12003	11733	10059	7735	8270	7958	9929	8389.12
4036	unknown759	0.00980952	0.0347873	18	6	6690.82	0.387541	1	20	6	23227.5	0.0249853	0.0855653	19	6.01667	17238.2	7001.85	0.406183	12886	9774	9966	12046	25916	24999	22729	19266	9304	15989	16808	15167	17155	15752	18076	16402	16389.7
4038	unknown760	0.00267199	0.0134688	18	15	28864.8	0.140065	0.965964	20	12	88124.2	0.00332733	0.0181348	19	13.6167	67401.3	30200.9	0.448076	82317	53859	59486	88948	39033	46914	34791	44876	66869	98526	98499	88603	61649	65766	64096	79509	67108.8
4039	unknown761	0.00421867	0.0189687	24	12	2800.67	0.0597801	0.9295	20.9501	12	14051.8	0.00234169	0.0144643	22.4751	12.0555	11253.9	3549.77	0.315425	10755	10040	7183	8981	10717	13372	10108	13209	14333	12923	15299	13652	9137	9002	8181	10518	11088.1
4041	unknown763	0.000572095	0.00471842	18	6	2285.72	0.526661	1	20	6	9164	0.00274406	0.0158002	19	6.01667	6895.21	2469.14	0.358095	5497	4110	5241	5406	9875	10509	7350	8922	4126	4616	5936	4125	7838	7088	6790	8107	6596
4042	unknown764	0.0299489	0.0829149	18	15	963.963	0.0523714	0.9295	20	12	4845.25	0.0116971	0.047071	19	13.6167	3296.83	1531.78	0.464621	3296	3500	2052	2473	2219	2659	2194	2755	4663	4811	4123	5784	2743	3451	3330	2459	3282
4043	unknown765	0.000987235	0.00692825	18	15	6116.47	0.0857151	0.9295	20	12	20104.8	0.000878139	0.00779169	19	13.6167	14910.7	7334.19	0.491874	18080	11986	13524	18474	7735	10135	7364	9345	15929	22827	22623	19040	12886	15599	14589	17299	14839.7
4045	unknown767	0.00164724	0.00965163	18	6	12803.6	0.700316	1	20	6	44772.2	0.00895748	0.0380679	19	6.01667	34438.3	10787.8	0.31325	36700	24405	21250	24221	46800	55508	38395	38386	13938	22038	21781	13564	49316	42811	38821	42163	33131.1
4046	unknown768	0.00267199	0.0134688	18	15	2079.07	0.0979253	0.946465	20	12	9039	0.00241992	0.0147581	19	13.6167	6466.35	3011.69	0.465747	7206	4838	5585	7285	4284	5291	3372	4760	7340	10268	10099	8449	5123	5897	5849	7349	6437.19
4050	unknown771	0.000320124	0.00340574	18	6	4515.76	0.638282	1	20	6	19119.5	0.00194027	0.0125957	19	6.01667	15161.2	4376.7	0.288677	13015	9763	11702	12461	21199	20317	16040	18922	9168	11411	13967	11061	16386	14794	15897	17991	14630.9
4051	unknown772	0.000320124	0.00340574	18	6	2837.62	0.699718	1	20	6	12662.5	0.00210644	0.0133692	19	6.01667	9922.22	3010.27	0.303387	8777	6825	7261	7473	14443	13894	9670	12643	5957	6600	9213	6623	11374	10396	10471	11299	9557.44
4052	unknown773	0.000320124	0.00340574	18	6	38455.3	0.557516	1	20	6	150551	0.0017189	0.0116835	19	6.01667	114002	39842.3	0.349489	96773	71644	80415	88006	158702	170370	116765	156366	69012	72780	100603	70856	121863	122788	114115	135721	109174
4054	unknown775	0.00267199	0.0134688	18	3	933.027	0.112014	0.946907	23.7736	6.63e-05	5483.99	0.00272785	0.015764	20.8868	1.7406	4197.21	1798.27	0.428443	6195	7590	3774	4377	4106	4164	2752	2901	2536	2687	2787	3653	5383	5546	4706	6378	4345.94
4057	unknown778	0.000572095	0.00471842	18	0	2903.03	0.0123685	0.9295	24.0327	17.9999	7204.97	9.1e-05	0.00245256	21.0163	18.3786	4405.08	3488.32	0.791887	8872	8474	5693	7511	1454	2078	1970	2667	2891	1721	2745	2853	7246	7530	6374	7670	4859.31
4059	unknown78	0.0065055	0.0255615	18	6	1571.19	0.695397	1	20	6	18825.8	0.0289456	0.0963371	19	6.01667	16704.2	2164.34	0.129569	16227	15018	15180	15467	19214	21040	13901	21148	14326	14270	15591	13799	17274	17352	16567	16696	16441.9
4060	unknown780	0.0419656	0.10784	24	12	1972.65	0.277899	1	23.3952	12	9214	0.0635754	0.17888	23.6976	12.0019	7346.61	2335.74	0.317935	6219	6991	4276	5161	9121	9643	6060	7040	7761	10447	10486	8162	6131	5499	4774	9408	7323.69
4068	unknown788	0.00267199	0.0134688	18	0	859.135	0.0544653	0.9295	24.1644	17.9999	2632.49	0.00143132	0.0104337	21.0822	18.3931	1900.59	1033.22	0.54363	2759	4073	1930	3047	1736	1376	1072	821	837	1097	1358	1877	2712	2911	2546	2361	2032.06
4070	unknown79	0.000320124	0.00340574	18	6	513893	0.27969	1	20	6	1.85653e+06	0.000924087	0.0080509	19	6.01667	1.48037e+06	341266	0.230527	1643531	1421638	1127015	1248624	1931444	2241363	1550656	1702638	597887	891182	904763	695552	2127965	1694456	1531765	1713798	1.43902e+06
4080	unknown799	0.0144977	0.0475569	24	21	1399.72	0.149473	0.966499	24.0327	17.9999	5073.24	0.0154604	0.0588773	24.0163	19.501	4058.83	1638.59	0.40371	5098	7667	3728	4485	3576	3479	2214	2513	2492	2505	2915	3958	4492	4620	4683	6498	4057.69
4082	unknown80	0.000572095	0.00471842	18	3	5168.95	0.295029	1	20	6.63e-05	19600.7	0.001635	0.0113819	19	1.58336	18245	8589.04	0.470762	24901	20743	15691	17068	18642	22301	18925	18193	9367	11968	14638	7648	28280	27992	27136	31733	19701.6
4084	unknown801	0.0299489	0.0829149	24	18	465.983	0.0914981	0.935114	28	17.9999	5313.24	0.018907	0.0687962	26	18.1071	4082.02	788.083	0.193062	3859	3576	3170	4095	3693	3331	3204	3662	3394	3624	4062	3719	4280	5887	5957	5129	4040.12
4085	unknown802	4.22e-05	0.00116331	18	15	2248.6	0.0912947	0.935114	20	12	5631	5.19e-05	0.00187766	19	13.6167	3944.09	2648.5	0.671512	5189	3703	4319	5041	1343	2050	1344	1968	4808	6360	5785	5571	3017	3575	4025	4597	3918.44
4093	unknown81	0.000320124	0.00340574	18	3	85124.2	0.222287	1	20	5.66e-05	242083	0.000750774	0.00708247	19	1.58336	214163	136328	0.636562	318014	259405	182674	208241	226078	274184	227807	194915	78911	125753	120335	68487	389022	344515	354035	424166	237284
4107	unknown822	0.0065055	0.0255615	18	6	7593.62	0.877963	1	20	6	25471.5	0.0352134	0.111635	19	6.01667	21221.3	4799.62	0.22617	18806	17760	13814	14037	27075	29822	21939	23050	8463	11182	12365	9537	32425	27392	35432	27136	20639.7
4108	unknown823	0.00980952	0.0347873	18	3	1272.09	0.126785	0.963963	24.7059	6.63e-05	11595.2	0.00956361	0.0402043	21.3529	1.77944	10414.1	3053.01	0.293162	12579	14336	8339	11127	10325	10174	6725	8904	7971	7749	9323	9015	12661	13714	12315	14525	10611.4
4109	unknown824	0.0419656	0.10784	24	18	2327.8	0.0864279	0.9295	28	17.9999	13782.2	0.0240084	0.0827677	26	18.1071	10760.9	382.173	0.0355149	9181	7972	7053	8564	10573	9520	7741	11016	10854	11907	12046	10294	10979	14749	16090	13311	10740.6
4111	unknown826	0.000320124	0.00340574	18	6	4425.96	0.242179	1	20	6	11431.8	0.000811314	0.00747445	19	6.01667	7398.13	4424.75	0.598091	4691	3984	4105	3856	12010	13054	10068	10595	3362	5013	5328	3778	8060	7219	7771	6897	6861.94
4112	unknown827	0.000320124	0.00340574	18	6	138600	0.221961	1	20	6	341845	0.000749777	0.00708247	19	6.01667	211529	141915	0.670901	130119	110116	102768	97756	364890	393433	293855	315203	88386	122146	137754	98370	232319	210484	222503	189204	194332
4115	unknown83	0.0144977	0.0475569	18	6	1335.02	0.812922	1	20	6.00001	18364	0.0641237	0.180296	19	6.01667	16401.3	2082.24	0.126956	15476	14451	14720	15392	18303	20615	13884	20654	14246	14514	15729	13636	16914	17008	16131	16710	16148.9
4116	unknown830	4.22e-05	0.00116331	18	6	3728.57	0.714125	1	20	6	9908	0.000343698	0.00457855	19	6.01667	6816.78	3359.44	0.492819	4657	4627	3924	3375	9833	12020	7864	9915	1960	2568	3100	2879	10707	7578	9290	8258	6409.69
4118	unknown832	0.0299489	0.0829149	24	0	3011.92	0.318519	1	20	4.91e-05	15903.7	0.0539194	0.156692	22	2.7e-05	13566.8	3398.61	0.250509	18467	20394	10628	14126	14801	15398	9975	13249	9486	9097	11156	11254	16579	16710	13330	16682	13833.2
4119	unknown833	0.00267199	0.0134688	18	6	3399.59	0.883182	1	20	5.99999	8369.5	0.016635	0.0624173	19	6.01666	6327.44	2263.22	0.357684	4933	4661	3586	3427	6983	10209	8491	7795	1496	1798	2310	2205	13305	8052	9048	8552	6053.19
4121	unknown835	0.00164724	0.00965163	18	9	1288.53	0.254946	1	20	6	5231	0.00368528	0.0194975	19	7.6	3974.71	1171.42	0.294719	2372	2444	1979	3633	5159	5449	5228	5088	2131	4039	3981	4292	3514	3730	2831	4041	3744.44
4123	unknown837	0.0210199	0.0632056	18	15	1009.75	0.0533251	0.9295	20	12	4971.25	0.00873578	0.0373405	19	13.6167	3414.63	1511.02	0.442514	3607	3582	2037	2534	2646	2553	2471	2899	4859	5070	4209	5747	2765	3444	3316	2661	3400
4124	unknown838	0.000572095	0.00471842	24	0	4923.76	0.17106	0.981551	24.1644	6.63e-05	17769.7	0.00100132	0.00840257	24.0822	3.3e-05	11632.9	7807.87	0.671186	16606	30429	10549	13495	10100	10607	5668	8569	5181	4824	5036	7902	17150	16358	11768	11552	11612.1
4127	unknown840	0.000320124	0.00340574	18	6	56851	0.057289	0.9295	20	6	113476	0.000218359	0.00379717	19	6.01667	56615.9	60024.9	1.06021	24305	21489	19184	15902	115103	124818	96367	117616	16033	20446	26275	18885	55720	37996	42471	36864	49342.1
4131	unknown844	0.0144977	0.0475569	24	0	1621.93	0.230312	1	23.2718	6.63e-05	7619.49	0.0223782	0.0783962	23.6359	3.37e-05	6372.33	2023.47	0.31754	8350	10302	5055	6771	6121	6528	4609	5627	4413	4485	5245	5102	7887	7593	6086	8184	6397.38
4135	unknown848	0.0065055	0.0255615	24	0	3683.32	0.135776	0.965964	22.5575	6.63e-05	14343.2	0.00709445	0.0318992	23.2788	3.42e-05	11812.8	4382.77	0.371019	15941	17929	10195	13308	12176	12248	8606	9733	7478	7134	8690	9671	14211	15796	11035	16634	11924.1
4140	unknown852	0.0419656	0.10784	18	0	507.172	0.776905	1	20	17.9999	4997.5	0.144215	0.345383	19	18.05	4798.4	612.859	0.127721	5895	7527	4383	5114	3654	4438	3820	4396	5032	4648	4779	5229	4971	5047	4637	5335	4931.56
4141	unknown853	0.0065055	0.0255615	24	21	904.743	0.0378405	0.9295	23.9024	17.9999	2801.49	0.00229173	0.0142706	23.9512	19.497	2177.37	960.734	0.441237	2837	3678	2025	2821	1450	1681	1181	1555	1550	1400	1822	1664	2537	3020	2457	3192	2179.38
4148	unknown86	0.00980952	0.0347873	18	6	577.883	0.880026	1	20	5.99997	6304.75	0.0496567	0.146998	19	6.01665	5753.88	563.759	0.0979789	5617	4896	5587	5561	6439	7088	4787	6905	4934	5203	5422	4846	6070	5981	5683	5950	5685.56
4157	unknown868	0.0144977	0.0475569	24	21	667.686	0.313256	1	22.2166	17.9999	3851.25	0.0290406	0.0965789	23.1083	19.4711	3202.6	651.907	0.203556	3794	3842	2322	3942	2229	3011	1750	2766	3390	2299	3631	3275	3086	4083	3737	4499	3228.5
4159	unknown87	0.00980952	0.0347873	18	6	1091.07	0.844974	1	20	5.99998	11945.5	0.0480157	0.143286	19	6.01666	10959.3	1009.73	0.0921349	10709	9762	10723	10244	12259	13216	9412	12895	9277	9737	10767	9584	11069	10963	11023	11751	10836.9
4163	unknown873	0.00164724	0.00965163	24	12	5365.35	0.0359669	0.9295	22.9091	12	17451	0.000635937	0.0064098	23.4545	12.0065	12038.5	7072.88	0.58752	7216	10939	6477	7453	15222	16655	10208	13771	19902	14093	17283	18526	6831	9833	6658	9562	11914.3
4165	unknown875	0.00164724	0.00965163	24	18	899.793	0.0642825	0.9295	28	17.9999	5548.49	0.0010751	0.00873394	26	18.1071	4156.24	683.013	0.164334	4042	3182	2746	3706	3639	3714	2602	3877	3822	4162	4284	3949	4719	5750	5367	6358	4119.94
4166	unknown876	0.0065055	0.0255615	18	6	4645.69	0.460479	1	20	6	19656.5	0.0204021	0.0731906	19	6.01667	14023	6206.04	0.442562	9619	9524	8566	10017	23015	21503	14881	19227	9141	8687	13519	8439	17251	15115	8768	15063	13270.9
4167	unknown877	0.00267199	0.0134688	18	6	2259.03	0.389486	1	20	5.99999	6270.75	0.00818812	0.0356327	19	6.01666	4331.55	2199.64	0.507819	2895	2009	2707	2554	6488	6921	5578	6096	2223	3218	3780	2797	5353	3899	3974	4548	4065
4168	unknown878	0.00267199	0.0134688	24	21	1865.88	0.0482256	0.9295	24.0327	17.9999	3481.49	0.00128302	0.00972937	24.0163	19.501	2225.16	2012.27	0.904328	4012	5538	2084	2933	640	779	731	843	964	589	1141	1400	3370	3880	2108	4568	2223.75
4172	unknown881	0.0299489	0.0829149	18	3	526.795	0.57065	1	27.3065	6.63e-05	4888	0.0866352	0.232279	22.6533	1.8878	5087.28	1971.26	0.387488	6120	4913	4330	4189	5194	5616	3132	4760	4249	3442	4736	3591	5436	9342	5796	7325	5135.69
4173	unknown882	0.0299489	0.0829149	24	12	2908.86	0.332941	1	24.9858	12	17286.2	0.0559192	0.160777	24.4929	12.0049	14777.8	3274.74	0.221598	14733	11090	10239	10562	15882	18097	12014	18577	20004	15659	18262	15220	11532	16595	11629	17203	14831.1
4175	unknown884	0.0144977	0.0475569	24	21	492.853	0.223776	1	21.3559	18	2846.5	0.0218366	0.0768096	22.678	19.4787	2287.57	568.572	0.248548	3401	2915	1809	2169	1895	1867	1146	1450	2219	2408	2197	2284	2565	3769	2448	2604	2321.62
4179	unknown888	0.0419656	0.10784	24	9	1073.03	0.50033	1	24.5682	6.00002	9175.25	0.102115	0.263107	24.2841	7.51859	8042.97	1174.21	0.145993	7529	6231	9577	7799	7969	10105	8903	9724	6522	10798	8485	8065	7527	5716	6938	7028	8057.25
4180	unknown889	0.0065055	0.0255615	24	21	1542.91	0.0796086	0.9295	23.7736	17.9999	6876.99	0.00443614	0.0221807	23.8868	19.4933	5702.29	1700.35	0.298187	7504	7873	5394	6444	4326	4785	3283	4996	5183	4733	4656	4684	7226	6865	5211	8206	5710.56
4181	unknown89	0.0419656	0.10784	18	15	45705.6	0.675592	1	20	12	191673	0.12937	0.319188	19	13.6167	139584	65365.8	0.468289	174773	76567	132112	205301	80843	120421	86230	115875	148174	219345	236829	162343	110984	113904	99068	140452	138951
4182	unknown890	0.00267199	0.0134688	24	21	7866.92	0.0637227	0.9295	23.9024	17.9999	30751.7	0.00164787	0.0113982	23.9512	19.497	25247.9	8426.81	0.333762	35456	34993	23802	29577	18563	20033	14765	21527	20812	21078	20405	20231	32273	31461	22704	36569	25265.6
4183	unknown891	0.0299489	0.0829149	24	12	3778.43	0.36892	1	24.1644	12	25810.8	0.0608283	0.172373	24.0822	12.0001	21991.9	4360.77	0.19829	21273	21554	13123	16310	26799	24459	17626	22521	23385	26933	27481	25444	20288	21491	16505	26867	22003.7
4187	unknown895	0.000171384	0.00241724	18	0	3979.77	0.0906757	0.935067	24.5682	17.9999	12095	0.000187604	0.00356102	21.2841	18.439	9997.37	4286.18	0.42873	18030	17293	10663	13663	4746	6642	5976	9386	10109	8115	7046	8010	12908	13263	9558	12651	10503.7
4189	unknown897	0.0299489	0.0829149	24	12	1005.33	0.367701	1	23.52	12	11283.2	0.0606637	0.17202	23.76	12.0012	10053.4	1619.74	0.161114	8724	7654	9964	9625	9919	10173	11183	11031	10001	14137	10650	10345	9063	9572	8332	10279	10040.8
4194	unknown900	0.0299489	0.0829149	24	12	2781.4	0.395	1	23.3952	12	31425.5	0.0643204	0.180614	23.6976	12.002	27867.4	4569.34	0.163967	24509	20935	27557	26020	27319	27480	31233	30771	27863	39415	30332	28092	24933	26720	22773	29209	27822.6
4195	unknown901	8.77e-05	0.00171035	18	12	3277.44	0.0228848	0.9295	20.5594	12	12379.5	2.83e-05	0.00148587	19.2797	12.0531	8826.74	4193.87	0.475132	6232	5477	5107	6823	9537	8084	8600	11403	12165	12422	13094	11837	5037	6789	4221	6738	8347.88
4196	unknown902	0.00421867	0.0189687	24	21	1297.54	0.085863	0.9295	23.3952	17.9999	4982.99	0.00323224	0.0178288	23.6976	19.484	4089.07	1338.13	0.327247	5278	5876	4140	4699	3055	2879	2227	3489	4042	3376	3442	3271	5340	5150	3437	6005	4106.62
4198	unknown904	0.0419656	0.10784	24	21	3767.46	0.273637	1	23.2718	17.9999	18199.2	0.0627778	0.177318	23.6359	19.4815	15734.5	4275.52	0.271729	21068	24798	13121	17095	12106	13735	8833	12838	14780	13626	14020	14019	19587	18538	13273	21399	15802.2
4199	unknown905	0.00980952	0.0347873	24	0	1451.34	0.083852	0.9295	24.0327	6.63e-05	5807.74	0.00666519	0.0305723	24.0163	3.31e-05	4529.38	1886.65	0.416536	5857	8004	4814	4556	4317	4369	2668	3068	3389	3169	2869	3606	5423	5765	4940	5640	4528.38
4200	unknown906	0.00164724	0.00965163	18	6	3653.97	0.250907	1	20	6	9673.25	0.00363349	0.019257	19	6.01667	6058.51	3983.32	0.657475	3699	2433	3284	3014	9417	10776	7705	10795	2642	3732	4192	3190	6420	5514	5810	6590	5575.81
4206	unknown911	0.00164724	0.00965163	24	21	3308.91	0.0154229	0.9295	24.0327	17.9999	7880.97	0.000294208	0.0042606	24.0163	19.501	5282.4	3519.2	0.666212	7423	9596	5726	6859	2955	3219	2140	2575	3449	2676	2562	3775	7312	8942	7248	8022	5279.94
4207	unknown912	0.0299489	0.0829149	18	12	2078.89	0.1895	0.994309	21.6708	12	12700	0.035026	0.111353	19.8354	12.1036	10465.2	2758.52	0.26359	9538	9338	7481	8199	8163	12058	9325	14168	15017	11121	12588	12074	8282	8963	7273	9247	10177.2
4208	unknown913	0.0419656	0.10784	24	12	1386.28	0.205759	1	21.5648	12	8398	0.049667	0.146998	22.7824	12.0344	6651.55	1759	0.26445	5620	5880	4277	5097	6792	7840	4861	6175	7704	9392	8906	7590	6354	5611	4505	8751	6584.69
4209	unknown914	0.0299489	0.0829149	18	0	689.076	0.320129	1	20	17.9999	3623.5	0.0541436	0.157133	19	18.05	3129.71	674.456	0.215502	4808	4212	3014	3636	1911	2727	2161	3218	3707	2557	2870	3105	4034	3846	3029	3585	3276.25
4210	unknown915	0.0419656	0.10784	18	9	420.375	0.457669	1	24.0327	12	5366	0.0951196	0.24992	21.0163	10.501	5033.1	399.865	0.0794472	4516	4255	4869	4744	4870	5713	4860	5222	4844	6120	5680	4820	4687	4581	4748	5205	4983.38
4211	unknown916	0.0419656	0.10784	18	6	612.531	0.732877	1	20	6	5455.5	0.137837	0.334057	19	6.01667	4599.78	926.059	0.201327	3725	4140	3577	4387	6275	6389	4447	4711	3339	4024	4147	4329	5204	5149	3810	4148	4487.56
4214	unknown919	0.00980952	0.0347873	24	21	1024.6	0.255091	1	24.2975	17.9999	4094.99	0.0174926	0.0646906	24.1488	19.5099	3526.21	1289.96	0.365822	4334	7104	3118	3946	2737	3307	1988	2347	2453	2636	2620	3319	4393	4017	3384	4586	3518.06
4216	unknown920	0.0065055	0.0255615	24	21	757.842	0.220654	1	25.8651	17.9999	4785.24	0.0108324	0.0443377	24.9326	19.5835	3529.59	1012.1	0.286747	3938	4011	3010	3196	3030	3431	2162	2526	3140	2623	2844	2806	3388	6534	5036	4183	3491.12
4218	unknown922	0.00421867	0.0189687	24	21	1582.68	0.0832701	0.9295	23.9024	17.9999	7911.74	0.00314541	0.017461	23.9512	19.497	6495.67	1772.09	0.272811	7546	9212	5768	7248	5069	5657	3979	5532	5801	5390	5014	6127	7658	8873	6461	8655	6499.38
4220	unknown924	0.00980952	0.0347873	24	21	807.162	0.172225	0.981551	24.0327	17.9999	3876.24	0.0124737	0.0496428	24.0163	19.501	3259.95	912.551	0.279928	4036	5264	2842	3302	2740	3183	1914	2538	2812	2380	2706	2927	3795	4108	3380	4222	3259.31
4230	unknown933	0.00421867	0.0189687	24	12	2832.67	0.12041	0.960278	23.1496	12	13264.5	0.00436095	0.0219569	23.5748	12.0039	10215.7	3772.78	0.369311	6006	6976	7568	9752	8033	11859	11260	13290	11014	11482	14513	16049	7057	9503	7508	10752	10163.9
4232	unknown935	0.00267199	0.0134688	24	12	6618.17	0.0161231	0.9295	24.0327	12	16944.2	0.000476147	0.005516	24.0163	12	11833.8	7961.77	0.672799	7169	8307	5155	6162	17722	18938	12992	14835	20235	16062	16651	14829	7205	8872	6044	8231	11838.1
4233	unknown936	0.0065055	0.0255615	18	3	3184.46	0.06051	0.9295	24.1644	6.63e-05	38190.9	0.00347986	0.0187644	21.0822	1.75688	32903.4	8253.24	0.250833	39714	44421	30625	38004	29422	32552	22518	27210	28127	26554	27970	28377	42957	43618	33638	40639	33521.6
4234	unknown937	0.000171384	0.00241724	24	21	1214.81	0.127307	0.963963	24.1644	17.9999	7224.99	0.000255989	0.00403925	24.0822	19.5053	5937.52	1380.45	0.232496	6016	7711	6040	6029	4953	5688	3139	5060	5790	4153	5790	5654	6425	8519	6825	7131	5932.69
4238	unknown940	0.00267199	0.0134688	24	0	1186.7	0.0589236	0.9295	24.2975	6.63e-05	3285.49	0.00153609	0.0108681	24.1488	3.3e-05	2060.84	1545.24	0.749808	2694	4894	2295	3259	1752	1405	810	929	1019	848	936	1373	2908	3392	2083	2258	2053.44
4239	unknown941	0.00421867	0.0189687	18	3	782.767	0.0298904	0.9295	24.0327	6.63e-05	6463.74	0.00125826	0.00957516	21.0163	1.75139	5389.41	1664.82	0.308906	6198	7218	5528	6911	4994	5155	3832	4121	4053	4239	4251	4658	7507	7041	5830	6759	5518.44
4248	unknown95	0.0065055	0.0255615	18	15	1055.36	0.140098	0.965964	20	12	6685.5	0.00729174	0.0324828	19	13.6167	5317.75	1561.38	0.293618	6103	4234	4939	5376	3977	5192	3608	4458	6051	7323	7434	5934	4940	5258	4784	5231	5302.62
4249	unknown950	0.00980952	0.0347873	18	0	13643.3	0.394903	1	20	18	61415.7	0.0253871	0.0864879	19	18.05	50070.7	14225.6	0.28411	70949	83783	51149	57583	34906	37028	39893	37476	69305	38834	44390	39626	54035	84118	42318	65192	53161.6
4250	unknown951	0.0144977	0.0475569	24	21	893.96	0.141907	0.966499	24.1644	6.63e-05	4412.99	0.0147847	0.0568541	24.0822	22.5771	3976.16	866.289	0.217871	4572	4870	3640	4570	4177	3651	3010	2885	3145	3039	3670	3624	4932	4992	3649	5144	3973.12
4254	unknown955	0.0144977	0.0475569	18	0	904.036	0.303314	1	20	17.9999	5740	0.0282608	0.0944206	19	18.05	4901.11	1039.05	0.212004	6355	7620	4052	6045	3753	3987	3536	3854	4956	4630	5177	5105	6195	5155	4539	7071	5126.88
4258	unknown959	0.000171384	0.00241724	24	21	2449.06	0.0278364	0.9295	23.3952	17.9999	11922.7	6.32e-05	0.00208985	23.6976	19.484	9953.47	2774.7	0.278768	11699	13170	10352	11672	7731	8222	6270	7681	8334	8573	9465	8978	11100	11996	10819	13776	9989.88
4259	unknown96	0.000320124	0.00340574	18	15	54720.3	0.51064	1	20	12	169258	0.00158873	0.0111316	19	13.6167	120097	70591.2	0.587786	157551	94469	117035	181552	59608	81672	52503	91858	146793	183952	209093	137196	92486	101825	82783	120236	119413
4260	unknown960	0.0299489	0.0829149	18	6	1043.69	0.635665	1	20	6.00001	6477.25	0.0944515	0.248466	19	6.01667	5666.22	843.576	0.148878	6441	4830	4455	4897	6879	6805	5431	6794	4413	5049	5560	4691	5536	5651	5782	5810	5564
4262	unknown962	0.0419656	0.10784	18	6	1563.77	0.749389	1	20	6.00001	12030.5	0.140242	0.337956	19	6.01667	10719.5	1328.72	0.123953	12247	9270	8161	10335	12576	12922	10007	12617	8342	9931	10422	9079	10395	10647	10539	11446	10558.5
4270	unknown97	0.000320124	0.00340574	18	15	80161.9	0.513838	1	20	12	241175	0.00159765	0.0111758	19	13.6167	177373	101655	0.573116	238118	166456	174391	269646	86099	115990	72070	129210	201700	268660	284847	209492	133182	156116	127544	188691	176388
4274	unknown973	0.0065055	0.0255615	18	0	685.01	0.538988	1	25.4179	17.9999	4119	0.0233286	0.0809396	21.7089	18.5412	4025.21	658.803	0.163669	5623	5416	3898	4662	2894	3601	3093	3864	3820	3733	4191	4176	4056	4224	3706	4490	4090.44
4276	unknown975	0.00267199	0.0134688	18	0	1381.33	0.185371	0.994309	23.3952	17.9999	10909.7	0.00426478	0.021573	20.6976	18.311	9379.39	1931.2	0.205898	11720	13744	8944	10317	8360	8452	6696	7607	7753	8671	9669	8966	10019	11513	9178	12929	9658.62
4279	unknown978	4.22e-05	0.00116331	24	21	2682.23	0.015798	0.9295	23.7736	17.9999	7110.73	1.01e-05	0.000967577	23.8868	19.4933	5011.74	2839.06	0.566482	6213	7206	6828	6568	2881	2730	1967	3093	4320	3812	3204	3144	5280	8152	6999	8012	5025.56
4280	unknown979	0.00267199	0.0134688	24	0	1511.09	0.104226	0.946907	24.7059	6.63e-05	5218.23	0.00255826	0.0153638	24.3529	3.27e-05	3268.72	2180.28	0.667014	5581	8210	3434	3648	2335	2424	1412	1822	1951	1714	1761	2016	4029	4582	3137	3856	3244.5
4289	unknown987	0.000572095	0.00471842	18	0	1148.34	0.0901637	0.935067	24.2975	17.9999	6497.49	0.000560818	0.00596682	21.1488	18.408	5560.01	1618.84	0.291158	8490	8273	5113	7457	4069	4148	4052	5225	4929	4587	4948	4897	6820	7197	5389	6584	5761.12
4297	unknown994	0.00980952	0.0347873	18	0	1548.92	0.275839	1	24.9858	17.9999	8922.99	0.0187037	0.068171	21.4929	18.4883	8331.13	1511.93	0.18148	10317	12629	7878	10045	6173	7474	6483	9332	8115	7243	6802	7745	9726	8823	8284	8859	8495.5
4299	unknown996	0.00980952	0.0347873	18	9	496.389	0.150351	0.966499	23.52	5.99999	5874	0.0110898	0.045173	20.76	7.83795	5445.57	515.336	0.094634	4790	4549	5052	5376	5734	5774	5627	6361	5389	6136	5792	5084	5008	4879	5204	5218	5373.31
4301	unknown998	0.000572095	0.00471842	24	21	1576.67	0.0161518	0.9295	24.0327	17.9999	3127.24	0.000116354	0.00275307	24.0163	19.501	1883.64	1637.93	0.869554	2828	3528	1940	3117	845	795	577	766	829	581	925	880	3656	2913	2342	3598	1882.5
4308	Uridine-5-diphosphoacetylglucosamine	0.0419656	0.10784	24	3	2009.6	0.120718	0.960278	20	5.99998	6066.75	0.031841	0.103741	22	4.67499	4567.56	1779.67	0.389634	5421	7024	3384	5445	6190	7461	5015	5601	2116	2590	1864	2236	6593	5409	3266	2592	4512.94
4322	Val-Ser	0.0419656	0.10784	24	12	2206.53	0.242465	1	24.0327	12	10549.2	0.056857	0.162717	24.0163	12	8892.77	2650.84	0.29809	7594	9905	5503	5860	12984	11717	8696	8167	8893	12119	10556	10629	8048	7055	5700	8881	8894.19
4328	Verbascose	0.0144977	0.0475569	18	6	1169.91	0.407425	1	20	5.99999	3733.75	0.0362181	0.114047	19	6.01666	2251.5	1404.95	0.624008	1252	3903	1282	853	6675	2401	2892	2967	1358	851	766	1255	1608	2032	1991	1214	2081.25
4330	Xylitol	0.0419656	0.10784	18	9	831.381	0.842414	1	26.4865	5.99999	3615.75	0.153514	0.36067	22.2432	8.08019	3039.72	543.692	0.178862	2293	1900	2439	2270	3448	4010	2719	4286	3760	2509	3774	2367	2756	2692	2665	4059	2996.69

## Sheet: unique cycling AM in AS
ID	CycID	JTK_pvalue	JTK_BH.Q	JTK_period	JTK_adjphase	JTK_amplitude	LS_pvalue	LS_BH.Q	LS_period	LS_adjphase	LS_amplitude	meta2d_pvalue	meta2d_BH.Q	meta2d_period	meta2d_phase	meta2d_Base	meta2d_AMP	meta2d_rAMP	X0	X0.1	X0.2	X0.3	X6	X6.1	X6.2	X6.3	X12	X12.1	X12.2	X12.3	X18	X18.1	X18.2	X18.3	AS
1	(-)-Riboflavin	0.139706	0.372952	24	3	668.393	0.746261	1	25.5652	6.63e-05	5213.24	0.339972	0.938351	24.7826	1.54895	4072.59	1008.59	0.247654	4345	5306	4308	6894	1893	3555	5085	3782	3249	3301	2446	4240	3408	3219	3478	6471	4061.25
2	(-)-Syringaresinol-4-O-.beta.-D-glucopyranoside	0.139706	0.372952	18	6	106.773	0.765623	1	20	6	622.25	0.346053	0.943583	19	6.01667	547.536	69.9232	0.127705	612	561	351	543	759	611	527	592	552	367	330	393	649	613	546	619	539.062
4	(3-Carboxypropyl)trimethylammonium cation	0.0787266	0.260816	18	6	376.888	0.999977	1	28	6	2831.25	0.278827	0.840064	23	6.29762	2561.77	216.542	0.0845282	2558	1828	2008	2342	3164	3169	2378	2614	2549	2286	2047	2515	3079	2744	2729	2859	2554.31
7	1,4-Butynediol	1	1	18	6	59.2202	0.998989	1	20	6	1055.5	0.999999	1	19	6.01667	833.866	254.2	0.304845	669	653	530	693	2226	779	609	608	1401	679	517	552	760	742	687	744	803.062
14	1-Methyladenosine	1	1	18	0	72.4784	0.915225	1	28	12	515.5	0.996301	1	23	4.92857	517.481	85.7929	0.165789	662	642	497	661	314	547	534	500	559	453	514	536	489	418	502	480	519.25
19	2,8-Quinolinediol	0.209188	0.502375	18	3	35.5321	0.496373	1	28	6	705.25	0.339016	0.938351	23	4.38095	774.707	27.8457	0.0359436	1068	616	322	479	646	831	768	576	576	564	559	780	1079	1198	952	1375	774.312
27	2-Phenylacetamide	0.139706	0.372952	18	0	55.6847	0.866355	1	28	17.9999	263.25	0.376622	0.988348	23	18.8928	345.029	189.052	0.547931	270	270	613	1571	276	187	212	222	296	176	259	243	236	233	247	337	353
28	3-(2-Pyrimidinyl)propanoic acid	1	1	18	0	25.8094	0.676917	1	28	12	226	0.941055	1	23	4.92858	1126.23	2201.71	1.95494	221	159	7696	8178	219	244	170	207	326	185	201	192	187	200	173	188	1171.62
30	3.alpha.-Galactobiose-CH3	0.301037	0.596563	18	3	889.187	0.858721	1	28	6.00002	7893.75	0.608224	1	23	4.38096	7276.51	2736.56	0.376082	7890	5339	1817	1738	8727	8940	7035	6873	5796	2249	3788	7669	11159	12001	9434	15349	7237.75
41	3-Hydroxypropanoic acid	0.235786	0.510223	24	18	452.725	0.496489	1	28	17.9999	7752.5	0.368173	0.976234	26	18.1071	7129.84	126.539	0.0177478	6646	7031	5675	6650	7465	7738	6257	6879	6966	7261	6910	7697	7894	8007	7195	7914	7136.56
46	3-Methylhexahydropyrrolo[1,2-a]pyrazine-1,4-dione	1	1	18	0	409.415	0.910899	1	28	6.63e-05	4363.74	0.995907	1	23	2.72e-05	3245.61	311.857	0.096086	2845	2709	5634	6267	2066	3815	3543	2642	2936	2312	3176	3415	2165	3982	1904	2699	3256.88
49	3'-O-Methylinosine	0.105571	0.313957	24	15	68.4126	0.529706	1	21.4599	12	589.25	0.217188	0.725635	22.7299	13.4582	493.959	115.55	0.233927	492	427	382	377	613	512	352	395	698	430	561	668	517	423	530	490	491.688
55	4-Hydroxybenzoic acid	0.587657	0.934468	18	0	368.403	0.999748	1	24.4321	17.9999	4246	0.899984	1	21.2161	18.4233	4094.59	301.992	0.0737539	4003	3639	4533	5583	5385	3747	3162	3140	4897	3446	3630	3950	4085	3953	4416	4530	4131.19
59	4-Nitrophenol	1	1	18	0	1456.29	0.874854	1	28	12	7020.5	0.991821	1	23	4.92857	9746.65	7246.7	0.743507	7645	6877	18441	44660	9317	7231	4192	6086	8060	5086	8009	6927	7219	3843	5960	8784	9896.06
62	5-Methoxy-3-indoleacetic acid	0.105571	0.313957	18	6	228.395	0.940202	1	20	6	1089.75	0.328547	0.929905	19	6.01667	953.97	137.976	0.144633	1190	799	666	741	1212	987	991	1169	1008	485	365	691	1129	1501	1026	1036	937.25
65	5'-S-Methyl-5'-thioadenosine	1	1	18	9	1320.52	0.946967	1	28	17.9999	12818.7	0.998568	1	23	13.1428	10839.1	125.918	0.011617	11486	13065	3308	4363	13703	12843	9041	9053	12224	7991	12956	12158	14723	11238	10489	14825	10841.6
66	6-Hydroxycaproic acid	0.475047	0.810143	18	3	211.955	0.827784	1	26.4865	6.16e-05	3773.5	0.760261	1	22.2432	1.85363	3778.04	518.547	0.137253	3792	4011	3464	3827	3999	3856	3693	3090	4031	3492	2983	3399	3613	4723	3934	4836	3796.44
85	Ala-Asn	0.0579045	0.211227	24	0	429.214	0.698409	1	27.4766	17.9999	4515.5	0.170172	0.622517	25.7383	21.2997	4805.42	880.632	0.183258	5120	4946	6618	7664	1878	4332	4804	4901	4721	3839	4157	4746	4439	4201	4405	5017	4736.75
87	Ala-Gln	0.587657	0.934468	24	3	523.789	0.82504	1	28	17.9999	9507.5	0.835834	1	26	22.9821	10194.7	1461.26	0.143335	10184	9575	15314	15393	4811	10814	9665	9839	10568	8535	8350	9987	9478	9435	8940	10177	10066.6
94	Ala-Leu-Lys	0.0787266	0.260816	24	21	397.748	0.398995	1	21.0501	17.9999	4045.5	0.140114	0.548051	22.5251	19.4853	3686.84	437.936	0.118784	4158	4352	3456	4029	2361	3664	3614	3219	3518	3276	3588	4043	4473	3795	3700	4214	3716.25
102	Ala-Trp	0.105571	0.313957	24	0	455.554	0.600664	1	26.4865	17.9999	3974.5	0.23831	0.765774	25.2432	21.1991	4048.04	589.012	0.145505	5323	4579	4131	5333	2019	4028	4346	4092	4162	3346	3025	3955	4137	3527	4159	4075	4014.81
106	Allantoin	1	1	18	3	1488.99	0.999591	1	20	5.63e-05	19194.7	1	1	19	1.58336	18292.9	1012.06	0.0553252	22789	14854	18897	20239	17636	21419	16335	20695	14855	14209	16885	22115	17844	17474	17010	22177	18464.6
114	Arg-Leu	0.719948	1	18	3	212.486	0.973134	1	28	5.99997	4646.75	0.949888	1	23	4.38094	4961.52	55.8535	0.0112573	5776	3440	4795	4544	3148	6059	4564	4816	6430	3312	3195	4225	8967	4636	6387	5103	4962.31
115	Arg-Phe	0.301037	0.596563	24	0	3286.63	0.795539	1	25.4179	17.9999	16265.5	0.581775	1	24.7089	21.1034	15441.7	5295.12	0.34291	14882	7910	30785	32520	6616	13612	12862	11492	16238	10019	10929	11387	23120	13021	16536	12385	15269.6
118	Arg-Trp	0.235786	0.510223	18	0	2353.6	0.887976	1	23.9024	17.9999	13025.2	0.536756	1	20.9512	18.3644	11323.5	2431.83	0.21476	13127	6267	17241	18392	5949	12983	10249	8603	13201	8010	8981	11253	16184	11625	13942	10350	11647.3
119	Arg-Val	0.475047	0.810143	24	0	363.099	0.961987	1	24.1644	6.63e-05	2725.25	0.814856	1	24.0822	3.3e-05	2418.84	431.991	0.178594	2683	1596	3243	3379	1157	2867	2218	2395	2830	1787	1827	2171	3106	2442	2733	2249	2417.69
120	Asn-Ala	0.139706	0.372952	24	0	713.824	0.680912	1	26.1721	17.9999	5853.75	0.318919	0.918165	25.0861	21.1695	5915.98	1256.17	0.212335	6373	5002	8095	10705	2606	6431	6012	4859	5508	4327	4923	5406	6238	5560	5690	5927	5853.88
131	Asn-Val	0.235786	0.510223	18	0	3035.61	0.653954	1	26.9725	18	12829	0.442465	1	22.4862	18.7462	13126.7	3639.53	0.277262	15077	11799	19413	28151	5342	12595	12833	11138	13103	9245	10600	13171	12823	12933	12824	12736	13361.4
132	Asn-Val-Lys	0.719948	1	18	3	28.6378	0.737533	1	27.3065	17.9999	2173.5	0.86711	1	22.6533	9.35407	1587.57	324.898	0.204651	1939	1563	1197	1352	1720	1723	1154	862	1384	972	1579	1587	3277	1558	1622	2237	1607.88
138	Asp-Ile	0.475047	0.810143	18	0	3542.78	0.932664	1	28	12	29476.2	0.803733	1	23	4.92857	29996.4	7289.05	0.242998	34981	33000	34162	46438	12794	28561	33553	28919	29551	29181	28368	30805	23539	32418	28552	27525	30146.7
140	Asp-phe	1	1	18	0	1154.35	0.999987	1	20	12	18333	1	1	19	15.2	17484.7	2200.26	0.125839	20250	19902	16032	22290	8206	17491	20575	16961	18492	18373	17055	19412	15389	20393	17066	15437	17707.8
142	Asp-Tyr	1	1	18	15	295.217	0.999696	1	20	12	5765.75	1	1	19	13.6167	5569.41	803.652	0.144298	6338	5401	5667	7990	2318	5543	6009	5259	5493	5805	5593	6172	4708	6499	5240	4951	5561.62
143	Asp-Val	0.873774	1	24	3	650.892	0.980613	1	28	12	9220	0.989224	1	26	7.19643	9479.45	1290.12	0.136096	9910	10280	10518	14639	4004	8932	10431	9319	8456	9059	9011	10354	7741	10191	8898	8240	9373.94
144	Benthiavalicarb-isopropyl	0.0579045	0.211227	18	0	160.513	0.610003	1	26.9725	17.9999	1231.75	0.153412	0.582566	22.4862	18.7462	1273.21	363.926	0.285832	1276	1065	2172	2865	969	1198	1008	1011	1066	967	1213	1010	1314	1461	1100	1052	1296.69
145	Benzoic acid	1	1	24	18	1594.53	0.914433	1	28	17.9999	17463	0.99623	1	26	18.1071	15466.2	726.719	0.0469874	18847	14632	11820	6781	16038	17172	13089	14928	15829	13435	17278	18377	20718	16542	17670	14922	15504.9
148	Betaine aldehyde cation	1	1	18	0	133.643	0.722367	1	28	12	1375.75	0.957297	1	23	4.92857	1681.29	880.336	0.523608	1342	1364	3956	4491	1447	1448	1213	1050	1265	1279	1554	1405	1392	1603	1213	1169	1699.44
161	Cirsimarin	0.962358	1	18	6	68.2358	1	1	25.8651	6	201.75	0.999282	1	21.9326	6.1993	183.436	13.0427	0.0711021	56	58	125	535	206	250	194	157	129	60	452	61	157	237	89	155	182.562
162	Citraconic acid	0.380147	0.698955	18	6	381.484	0.99709	1	20	6	4656.75	0.746753	1	19	6.01667	3598.54	1238.12	0.344062	2948	2507	2394	2427	9625	3406	2709	2887	6122	3015	2072	2283	3233	3150	3036	3362	3448.5
163	Citrulline	0.531352	0.905096	24	3	7.42462	0.795644	1	21.4599	6.63e-05	106	0.786742	1	22.7299	1.42066	99.8376	7.58627	0.0759861	98	106	105	115	115	111	87	108	97	74	97	98	106	83	92	109	100.062
164	CMPF	0.122638	0.36297	18	6	44.1942	0.983266	1	26.9725	6.63e-05	286.249	0.375673	0.987108	22.4862	3.74773	154.31	8.98362	0.0582181	888	123	80	54	75	167	137	197	74	75	68	57	85	89	125	176	154.375
165	Coniferylaldehyde	0.235786	0.510223	24	0	63.9932	0.711389	1	27.1385	6.63e-05	780.248	0.467205	1	25.5692	3.12e-05	472.436	227.37	0.481272	406	226	1049	1440	332	357	367	358	423	297	201	310	422	472	410	334	462.75
166	Cotinine	1	1	18	3	60.4576	0.993334	1	20	6	4336	0.999978	1	19	4.43333	1569.31	2845.32	1.8131	417	335	352	421	16306	299	238	501	392	210	319	305	297	219	2233	1659	1531.44
170	Cyclo(Leu-Pro)	0.475047	0.810143	18	0	725.845	0.869631	1	28	12	4526.5	0.778322	1	23	4.92857	4819.47	2093.06	0.434294	4746	4231	8114	11056	2317	4453	4184	3936	4288	3635	4846	5337	3948	4427	3698	4586	4862.62
173	Cystine	0.139706	0.372952	18	15	1421.99	0.71467	1	20	12	14403.5	0.329899	0.932891	19	13.6167	12641.7	2100.19	0.166131	12043	14253	9125	13638	8079	11076	11786	12627	13712	16339	14359	13204	13397	15903	13010	9391	12621.4
179	Disaccharide 01	0.0787266	0.260816	18	6	843.578	0.842448	1	20	6	5534.25	0.246272	0.784663	19	6.01667	4863.26	665.963	0.136937	4892	3890	3611	5419	4927	7119	4790	5301	4298	2818	3368	4030	5680	5897	5109	5372	4782.56
180	Disaccharide 02	0.0579045	0.211227	18	6	1479.27	0.695597	1	20	6	8219.75	0.16965	0.622517	19	6.01667	7259.77	917.219	0.126343	8155	5963	5242	7643	8076	10204	7385	7214	5531	4524	5179	5572	8106	9557	8053	7974	7148.62
182	Disaccharide 04	0.0579045	0.211227	18	6	2341.23	0.777654	1	20	6	15499.8	0.184641	0.65265	19	6.01667	13534.3	1768.06	0.130635	13871	10055	11233	16769	21601	15369	11839	13190	10911	9105	9908	9984	15197	15106	13452	15531	13320.1
184	Disaccharide 06	0.380147	0.698955	18	6	15788.6	0.989253	1	28	5.99999	61021	0.743851	1	23	6.29761	51606.6	4817.68	0.0933539	53276	28230	27406	25317	65654	71999	55965	50466	38187	28954	35731	45550	77572	76466	64592	77685	51440.6
185	Disaccharide 07	0.105571	0.313957	18	6	11246.5	0.999595	1	28	5.99998	46165.8	0.342837	0.938351	23	6.29761	37736.7	5431.27	0.143925	38220	21025	21961	17746	53197	55571	36543	39352	29272	21970	26973	33832	52779	51397	45777	55179	37549.6
186	Disaccharide 08	0.182589	0.440451	18	3	545.003	0.988413	1	28	6	2719.5	0.489474	1	23	4.38095	2285.77	1153.02	0.504435	2568	1756	642	521	3522	2779	2090	2487	1665	847	1114	1852	3609	3803	3021	4035	2269.44
191	Disaccharide 13	0.0579045	0.211227	18	6	7012.38	0.999572	1	28	6.00002	26744.8	0.222802	0.733072	23	6.29763	21703.3	3454.85	0.159186	21429	11949	12453	10392	31017	30995	22457	22510	16564	12680	16103	20023	30818	28910	26428	30620	21584.2
192	Disaccharide 14	0.105571	0.313957	18	6	1469.19	0.999976	1	28	6	4824	0.342927	0.938351	23	6.29762	3427.26	838.451	0.244642	3019	1222	1136	719	7144	5649	3224	3279	1820	1163	1749	2356	6014	5662	4399	5819	3398.38
195	D-myo-Inositol, 1-[2-hydroxy-3-[(1-oxo-9,12-octadecadienyl)oxy]propyl hydrogen phosphate], [S-(Z,Z)]-	0.182589	0.440451	24	3	3900.05	0.735337	1	21.6708	6.63e-05	15896.7	0.403859	1	22.8354	1.42725	11930.2	5022.62	0.421001	7056	6810	26056	23665	19440	11277	11919	14700	4111	5426	11391	6634	12682	6724	9616	15516	12063.9
198	Donepezil	1	1	18	15	365.397	0.998749	1	23.9024	12	5522.25	0.999999	1	20.9512	13.9889	5072.51	428.775	0.0845291	6726	6473	2260	3013	3348	5325	5163	5056	5764	4982	4936	6407	5517	5294	5251	5573	5068
199	Eicosenoic acid	1	1	24	0	10.9602	1	1	20	6.63e-05	229.5	1	1	22	3.65e-05	226.214	15.6087	0.069	168	190	229	331	202	265	204	235	157	213	269	205	280	237	217	237	227.438
200	Enrofloxacin	0.0579045	0.211227	24	18	212.839	0.241376	1	22.2166	17.9999	1502.5	0.0736625	0.364469	23.1083	18.0268	1335.24	103.652	0.0776285	1530	1239	1221	966	871	1345	1000	1300	1601	1479	1419	1436	1450	1586	1328	1646	1338.56
202	Erythronolactone	0.719948	1	18	6	1657.81	0.999938	1	20	6	11695.2	0.956491	1	19	6.01667	10457.9	1462.29	0.139826	12790	8584	7232	7546	12584	14440	10218	9539	10609	7836	8957	9249	12640	12277	10399	9591	10280.7
206	Galactosamine	0.139706	0.372952	18	3	308.652	0.9676	1	20	6	2292.5	0.405695	1	19	4.43333	2145.85	457.928	0.213402	2433	1547	1624	2465	2157	2821	2204	1988	1778	1533	1744	1782	2316	2913	2337	2594	2139.75
229	Glucuronic acid	0.531352	0.905096	18	0	53.7401	0.890427	1	24.4321	17.9999	582.5	0.827214	1	21.2161	18.4233	552.34	57.5327	0.104162	608	551	578	733	341	573	494	630	510	449	573	579	524	625	587	594	559.312
234	Glu-Leu	0.0787266	0.260816	24	0	1702.36	0.39211	1	27.6489	17.9999	15266	0.138233	0.542164	25.8245	21.3183	16400.1	2805.03	0.171037	17555	17170	22909	25112	9488	14790	15060	17590	15880	13109	14018	14991	14283	15351	14846	16584	16171
236	Glu-Met	0.235786	0.510223	18	0	749.533	0.913616	1	28	12	6981	0.546123	1	23	4.92858	7226.88	2257.83	0.312421	7838	7391	8649	13591	3117	6822	7086	6819	6456	7096	6737	7635	6067	7674	6411	6986	7273.44
249	Gly-Gly-Gly	0.475047	0.810143	24	3	53.3866	0.840831	1	28	12	665	0.765997	1	26	7.19643	748.988	184.013	0.245682	741	660	1147	1630	259	726	688	731	640	585	667	768	508	680	650	663	733.938
258	Gly-Ser	0.235786	0.510223	18	0	306.177	0.596953	1	26.3284	17.9999	1543.75	0.416735	1	22.1642	18.6586	1529.06	333.504	0.21811	1739	1441	2260	2555	839	1444	1191	1544	1535	1172	1440	1550	1468	1442	1802	1463	1555.31
259	Gly-Thr	0.475047	0.810143	24	3	259.508	0.714712	1	28	12	6493.25	0.706279	1	26	7.19643	7310.25	1868.44	0.255592	7053	6589	12710	14065	3528	6532	6528	6469	7054	5632	6387	6900	6108	6439	6184	6341	7157.44
269	Hexadecanedioic acid	0.0787266	0.260816	18	3	391.384	0.965519	1	20	6	3856.75	0.271885	0.831704	19	4.43333	3720.63	606.052	0.16289	4293	3303	3265	3148	4359	4135	3331	3602	3533	2958	2932	3101	4677	4501	4317	3946	3712.56
272	His-Ala	0.719948	1	18	0	485.075	0.779977	1	26.4865	17.9999	3307.75	0.885591	1	22.2432	18.6798	3301.8	919.237	0.278404	3218	2465	6426	6498	1652	3175	2813	2968	3499	2226	2721	3043	4079	2788	3437	2927	3370.94
280	His-Pro	0.0787266	0.260816	24	0	496.566	0.669909	1	28	6.63e-05	8685.97	0.20792	0.705007	26	3.08e-05	4577.6	2477.49	0.541221	3573	3143	10728	17300	2157	3511	3207	2850	3194	2390	2683	3136	3105	3841	3293	3099	4450.62
286	His-Trp	1	1	18	0	658.67	0.998129	1	25.2722	17.9999	6250.75	0.999998	1	21.6361	18.5231	6035.9	755.677	0.125197	6773	4995	6520	9671	2757	7019	6189	5641	7437	4236	4972	6598	6823	5115	6367	6698	6113.19
291	Ile-Ala-Lys	0.139706	0.372952	24	18	310.42	0.6682	1	22.3291	17.9999	3256.5	0.314724	0.910933	23.1646	18.0234	2932.41	249.904	0.0852216	3451	3072	2317	2489	1639	2914	2892	2758	2966	2685	3206	3623	3228	3383	3116	3299	2939.88
315	Isomaltose A	0.0579045	0.211227	18	6	756.427	0.993045	1	20	6.00001	4519.75	0.221723	0.733072	19	6.01667	3981.81	630.742	0.158406	4273	2976	2977	3144	4213	5331	3960	4575	3587	2592	3200	3309	4506	4563	4573	4707	3905.38
320	L-.beta.-Homolysine	0.139706	0.372952	18	3	5958.61	0.904841	1	20	6	55486.5	0.387858	1	19	4.43333	52537.2	8351.6	0.158966	56501	47053	42812	60052	52757	67878	51906	49405	38548	38659	46335	52351	56088	61379	54217	62875	52426
321	L-.beta.-Homomethionine	1	1	24	18	1102.73	0.99962	1	28	17.9999	9270.25	1	1	26	18.1071	7878.92	408.808	0.0518862	13274	12343	211	457	3739	8486	8380	7214	9979	6821	7304	10426	9843	8938	7480	10820	7857.19
323	Lauroyl-L-carnitine	0.0787266	0.260816	18	6	40510.1	0.99825	1	28	6	152009	0.278482	0.840064	23	6.29762	110791	38004	0.343026	76532	29400	49935	74370	209078	151456	128693	118809	116654	94588	76016	70981	144659	168447	129377	112705	109481
324	Leu-Ala-Lys	0.0579045	0.211227	24	21	213.9	0.426733	1	22.5575	17.9999	1155.75	0.11615	0.485958	23.2788	19.4722	950.661	232.026	0.244068	941	1267	958	1113	488	893	779	661	782	735	970	1119	1602	762	981	1278	958.062
327	Leu-Gln	0.105571	0.313957	18	0	7459.98	0.667689	1	26.1721	17.9999	29009.7	0.257445	0.805826	22.0861	18.6379	28110.2	7997.04	0.284489	34008	24726	39979	57930	9640	30981	24931	22902	28861	17966	23454	28861	32192	26585	26816	30446	28767.4
331	Leu-Ile	1	1	24	18	1146.57	0.99999	1	28	17.9999	19826.2	1	1	26	18.1071	17723.1	94.3864	0.00532561	27790	29602	1485	1553	8850	18494	20582	18539	24189	17516	15047	20698	20204	18403	20879	19819	17728.1
344	Lidocaine	1	1	24	0	197.636	0.988739	1	26.0177	6.63e-05	1632.24	0.999936	1	25.0088	3.19e-05	980.014	563.791	0.575289	845	295	1037	4352	1093	292	252	974	904	319	766	410	375	283	1440	1778	963.438
347	L-Propionylcarnitine	0.301037	0.596563	18	9	1123.24	0.396884	1	28	6.00002	3714.75	0.373321	0.982663	23	8.21429	3208.73	543.373	0.169342	1810	1263	1718	2624	4604	3791	3521	2943	4006	3568	2975	2915	4230	4157	3363	3456	3184
350	Lys-Glu	0.380147	0.698955	24	21	133.643	0.616848	1	24.7059	17.9999	860.749	0.574585	1	24.3529	19.5258	670.62	176.713	0.263507	879	646	702	583	526	633	460	395	587	378	769	687	1158	512	613	1160	668
358	Lys-Trp	1	1	18	9	375.65	0.999983	1	20.2759	17.9999	11150	1	1	19.1379	13.2794	10586.4	326.494	0.0308409	14632	9963	8776	10085	4110	12435	11609	10531	10643	11339	10170	10304	11078	11918	10553	11051	10574.8
360	Lys-Val	0.719948	1	18	0	956.008	0.856985	1	25.5652	17.9999	5443.25	0.914933	1	21.7826	18.5596	5217.57	876.227	0.167938	5488	4669	7410	7844	2473	5591	5043	5152	5857	3816	4479	5228	6309	4677	5710	5077	5301.44
362	Maltose	0.105571	0.313957	18	6	401.637	0.999468	1	20	6.00001	1937.5	0.342807	0.938351	19	6.01667	1719.63	278	0.161663	1812	1173	1168	1306	1987	2212	1800	1751	1301	1035	1347	1459	2136	2524	1857	2107	1685.94
363	Maltose B	0.0579045	0.211227	18	6	11009.3	0.999928	1	28	5.99998	41920	0.22286	0.733072	23	6.29761	33579.5	5784.64	0.172267	33254	18674	19442	16759	47600	48731	35353	35996	26199	20334	23958	30318	45815	44145	40397	47109	33380.2
365	Maltotriose	0.0787266	0.260816	18	6	1851.56	0.999972	1	20	5.99999	5900.75	0.278826	0.840064	19	6.01666	4412.55	1918.51	0.434785	4201	1954	1019	1233	8212	6873	3527	4991	2923	1616	2549	3248	6894	6844	5372	5425	4180.06
370	Met-Asn	0.139706	0.372952	18	0	216.021	0.829542	1	25.7143	17.9999	1301.5	0.365651	0.974919	21.8571	18.5785	1245	299.066	0.240214	1322	1061	1648	2549	511	1199	1203	1141	1277	870	1049	1326	1382	1289	1171	1364	1272.62
381	Methylacetate	0.719948	1	18	6	5262.11	1	1	20	6.00001	62530.5	0.956506	1	19	6.01667	58444.7	5169.94	0.0884587	66616	52252	47132	44625	65975	71988	54563	57596	60911	50711	52600	54854	69737	63185	59374	52972	57818.2
382	Methylpropionic acid	1	1	18	15	752.008	1	1	20	12	5816	1	1	19	13.6167	4633.56	2530	0.546016	14205	2533	3469	5866	3380	2819	2250	3166	14490	2633	3381	2760	3080	2830	2877	4006	4609.06
393	Myristoyl-L-carnitine	0.587657	0.934468	18	9	20628.2	0.921262	1	28	5.99999	98954.5	0.873593	1	23	8.21428	86767.3	8389.72	0.0966923	79155	37914	62227	61384	122894	106941	84234	81749	111544	78796	73594	71479	99617	110397	87110	113132	86385.4
396	N,N'-Diacetylcystine	1	1	24	18	4.94975	0.999753	1	27.3065	17.9999	175.25	1	1	25.6533	18.075	157.647	12.8414	0.0814565	125	153	126	211	153	153	127	160	165	126	153	160	138	253	169	141	157.062
408	N2,N2-Dimethylguanosine	0.122638	0.36297	18	6	203.647	0.99424	1	20	6.00001	842.75	0.378513	0.99012	19	6.01667	659.792	224.704	0.340569	571	356	385	398	1160	947	517	747	613	442	432	571	806	850	690	636	632.562
416	N-Acetylleucine	0.587657	0.934468	18	6	205.768	0.999998	1	20	6	3144.25	0.900062	1	19	6.01667	3052.02	92.9641	0.0304599	3310	2700	3099	2819	3502	3339	2748	2988	3837	2389	2393	2694	2974	3089	3335	3436	3040.75
419	N-Acetylneuraminic acid	0.139706	0.372952	18	3	248.194	0.959241	1	26.4865	6	1994.5	0.403353	1	22.2432	4.37299	2014.95	152.624	0.0757458	2504	1720	1603	2034	2425	2436	1703	1414	1693	1584	1542	1692	2389	2300	1961	3187	2011.69
421	Nafadotride	0.139706	0.372952	24	3	27.2236	0.365867	1	28	6.63e-05	423.499	0.203111	0.694138	26	1.62503	266.987	9.23722	0.034598	308	233	571	582	242	229	212	219	222	198	221	225	192	193	234	188	266.812
426	Nicotinamide riboside cation	0.873774	1	24	18	10725.9	0.905259	1	28	18	259758	0.976454	1	26	18.1071	244216	3811.11	0.0156055	256394	246951	192518	228546	223039	267808	215947	239027	258577	238361	242523	255486	257546	241059	243424	297003	244013
438	Norharmane	1	1	24	0	45.9619	0.64444	1	27.6489	6.63e-05	556.248	0.92759	1	25.8245	3.1e-05	286.671	181.087	0.63169	210	154	901	960	220	150	135	192	187	164	155	139	129	280	129	343	278
439	Octadecanedioic acid	0.182589	0.440451	18	3	331.987	0.951303	1	28	6	5940.25	0.477744	1	23	4.38095	5962.11	316.818	0.0531386	6661	5308	4986	5602	7662	5897	4843	5359	6389	4158	4864	5236	7553	7540	6962	6302	5957.62
441	Oleic acid	0.0579045	0.211227	18	3	2435.98	0.87867	1	20	6	20408	0.202412	0.69339	19	4.43333	20539.3	2705.4	0.131718	15827	15749	23138	26333	19550	19485	21062	21535	15733	15072	17289	20021	24883	25876	25223	21277	20503.3
442	Oleoyl-L-carnitine	0.301037	0.596563	24	15	3522.1	0.398282	1	28	17.9999	27070	0.374215	0.984416	26	16.4821	24061.6	3714.33	0.154367	18539	12352	17896	24211	26688	27152	25194	19887	31657	23989	25957	24445	29202	32123	22030	24925	24140.4
445	Orthanilic acid	1	1	18	6	156.624	0.992449	1	28	6	929.75	0.999971	1	23	6.29762	832.369	135.875	0.163239	917	1039	69	204	957	952	991	819	730	541	870	1168	914	834	953	1285	827.688
448	Palmitic acid	1	1	24	18	582.302	0.9869	1	28	17.9999	9959.25	0.999914	1	26	18.1071	9177.63	282.073	0.0307349	7597	7453	9085	9039	9713	8609	10280	8151	8440	7602	12511	8765	10186	10393	10421	8837	9192.62
455	Phe-Asn	1	1	18	0	457.498	0.971695	1	26.6465	17.9999	3889.25	0.999596	1	22.3233	18.7014	3889.68	727.32	0.186987	4040	3094	4735	7912	1664	4377	3949	3401	3758	3027	3663	3892	3434	4669	3856	3598	3941.81
456	Phe-Gln	0.475047	0.810143	24	0	1434.01	0.677634	1	24.1644	17.9999	7388.24	0.686787	1	24.0822	21.0105	6486.15	1666.49	0.256931	5983	4704	8845	12153	4235	6529	5519	4877	6405	3812	4993	6069	8078	5715	6590	9170	6479.81
457	Phe-Glu-Arg	1	1	24	18	52.5027	0.97843	1	27.1385	17.9999	833.249	0.999766	1	25.5692	18.068	730.409	76.8339	0.105193	633	783	881	527	635	815	600	631	619	616	809	751	1083	740	600	910	727.062
458	Phe-Glu-Lys	0.182589	0.440451	24	18	124.804	0.701474	1	25.5652	17.9999	1268.75	0.3913	1	24.7826	18.0179	1075.94	169.851	0.157863	1048	1229	980	902	661	1236	830	923	997	787	1249	1234	1499	1054	1052	1470	1071.94
469	Phe-Pro	0.427597	0.784532	18	0	222.208	0.681971	1	28	17.9999	1176.75	0.650971	1	23	18.8928	1448.1	547.53	0.378102	1311	1254	3019	4214	693	1296	1157	1220	1311	936	1144	1277	1061	1397	957	1292	1471.19
475	Physanguloside A	0.105571	0.313957	18	6	1022.83	0.972733	1	20	6.00001	2775.25	0.336421	0.938351	19	6.01667	2232.38	619.466	0.277492	3099	1136	928	1182	2840	3605	2181	2475	1356	826	808	1153	3511	3566	2849	3002	2157.31
485	Pro-Glu b	1	1	18	0	218.142	0.709666	1	28	12	1662.5	0.953054	1	23	4.92857	1966.54	843.7	0.429027	1778	1574	4400	4492	1115	1756	1717	1821	1835	1415	1627	1773	1390	2027	1575	1448	1983.94
489	Pro-Leu	0.380147	0.698955	18	3	2676.75	0.852813	1	20	6.00001	19053	0.689371	1	19	4.43334	17804.3	3152.69	0.177075	19959	14829	14640	20658	18952	23290	17113	16857	14972	12804	14841	15875	19541	22459	19053	18354	17762.3
515	Riboflavin	0.139706	0.372952	24	3	881.762	0.819828	1	25.2722	6.63e-05	7063.49	0.362718	0.969487	24.6361	1.53979	5602.5	1462.76	0.261091	5672	7303	5968	9311	2461	5283	6868	5196	4416	4400	3266	6065	4868	4563	4511	9266	5588.56
521	Salicylic acid	0.182589	0.440451	18	0	5114.15	0.78588	1	20	17.9999	49956.2	0.42208	1	19	18.05	47112.2	4467.8	0.0948332	50220	46982	55493	57743	52780	43446	37986	34121	56749	40655	44564	48764	47846	47934	49625	54420	48083
523	Ser-Ala	0.301037	0.596563	18	0	1240.62	0.626082	1	27.6489	17.9999	6951.75	0.502998	1	22.8245	18.8418	7302.85	1474.26	0.201874	8036	7054	11530	11945	3634	7101	6769	7191	7669	5794	6185	7304	7010	6647	6907	7243	7376.19
537	Ser-Ser	1	1	18	0	80.6102	0.936658	1	28	12	1213	0.99795	1	23	4.92858	1300.51	414.909	0.319036	1121	1234	1909	2719	529	1216	1448	1157	1248	1151	1161	1292	1163	1303	1187	1107	1309.06
540	Ser-Tyr	0.105571	0.313957	18	0	2641.75	0.408907	1	25.5652	17.9999	10644.2	0.178832	0.636794	21.7826	18.5596	9983.45	2619.02	0.262336	12050	8988	16282	16451	4741	10007	8428	9639	11094	7199	7839	8451	12685	9488	10684	9720	10234.1
544	Stanozolol	0.0787266	0.260816	18	6	374.943	0.999979	1	20	6.00002	1984	0.278828	0.840064	19	6.01668	1686.34	376.766	0.223422	1759	1174	1066	1035	2499	2282	1540	1615	1716	1010	1391	1415	1897	2158	1462	2232	1640.69
547	Succinic acid	1	1	18	6	31266.1	0.999999	1	20	6	364188	1	1	19	6.01667	342153	26386.6	0.0771193	402459	313068	278733	268336	376869	420805	323154	335923	355438	279141	314428	327236	399057	379267	347324	302055	338956
551	Tetrasaccharide 02	0.587657	0.934468	24	0	503.99	0.999629	1	24.0327	17.9999	5727	0.899947	1	24.0163	21.002	5339.57	583.694	0.109315	5468	2741	6485	8411	2641	6185	5665	5143	4700	5019	5606	4454	5395	5968	5450	6095	5339.12
553	Thiazolidine-4-carboxylic acid	1	1	18	9	328.981	0.999675	1	28	12	3417	1	1	23	10.6786	3200.28	294.072	0.0918893	3406	4899	788	1123	2988	3731	3657	3251	3239	2551	3950	3928	3115	2407	3521	4454	3188
554	Thr-Ala	0.235786	0.510223	18	0	629.325	0.592192	1	28	17.9999	3106.5	0.414529	1	23	18.8928	3435.79	943.459	0.274598	3652	3095	6729	6595	1867	3288	2863	3020	3595	2339	2947	3193	3310	2770	3159	3187	3475.56
558	Thr-Gln	0.380147	0.698955	18	0	903.329	0.895181	1	26.9725	17.9999	5804	0.707119	1	22.4862	18.7462	5875.29	803.599	0.136776	6333	5943	7868	8076	2884	6148	5691	6001	6274	5249	4743	6408	5828	5436	5536	6416	5927.12
561	Thr-Ile-Lys	1	1	18	15	410.475	0.930128	1	20	17.9999	5202.5	0.9975	1	19	16.4666	4859.67	350.264	0.0720757	5399	5547	3796	4929	3210	5124	5070	4078	5083	4383	5699	5590	6086	4773	4910	5041	4919.88
571	Thr-Val-Leu	1	1	18	15	671.221	0.993761	1	20	12	3525.75	0.999981	1	19	13.6167	3243.64	582.458	0.179569	4459	4980	1775	2602	1950	3345	2733	2408	3868	2569	3678	3988	4348	2957	2953	3195	3238
577	Trehalose	0.105571	0.313957	18	6	21274.5	0.999569	1	28	5.99998	82886.8	0.342831	0.938351	23	6.29761	67143.1	10054.4	0.149746	66919	35609	37920	31315	95835	99495	65084	71133	51215	37237	46843	59993	97198	91378	82464	99109	66796.7
580	Trisaccharide 01	0.0579045	0.211227	18	6	254.382	0.686254	1	20	6	1390	0.167908	0.61876	19	6.01667	1233.42	145.797	0.118206	1300	940	953	1466	1552	1503	1223	1282	1021	767	919	909	1233	1458	1287	1639	1215.75
584	Trisaccharide 05	0.105571	0.313957	18	6	5455.15	0.999988	1	28	5.99998	16836.5	0.34293	0.938351	23	6.29761	11929.1	3491.1	0.292654	11859	4917	2314	2354	24380	19588	9548	13830	7773	5043	7051	9126	20132	19360	15526	16140	11808.8
602	unknown1	0.182589	0.440451	24	0	299.813	0.611996	1	20	6.2e-05	2818.5	0.356635	0.961538	22	3.41e-05	2546.17	360.504	0.141586	3104	2244	2923	3003	3054	2585	2306	2329	2675	1863	1948	2162	2514	2354	2736	3391	2574.44
606	unknown1001	1	1	18	15	193.924	1	1	20	12	4335	1	1	19	13.6167	4163.29	255.653	0.0614064	4335	4562	3293	4789	2911	4932	3889	4236	4537	3875	4094	4834	4590	3853	3616	4227	4160.81
609	unknown1004	1	1	24	18	418.254	0.99964	1	28	17.9999	4133.75	1	1	26	18.1071	3689.16	117.045	0.0317268	4837	5575	1217	1484	3536	3708	3278	3155	4463	3311	3662	4166	4983	3331	3692	4529	3682.94
612	unknown1007	1	1	24	18	349.488	0.999543	1	24.5682	17.9999	3623.5	1	1	24.2841	18.0024	3331.5	159.025	0.0477337	3923	4711	1788	2110	2564	3650	3084	2925	4010	2905	3420	3697	4266	2984	3233	4011	3330.06
613	unknown1008	1	1	18	15	438.406	0.918112	1	21.7778	12	4575.25	0.996552	1	19.8889	13.7666	4218.59	405.724	0.0961753	4995	5006	2780	3114	3021	4322	3710	4188	4904	4259	4296	4842	4924	4103	4431	4524	4213.69
617	unknown1011	1	1	24	18	676.878	0.999154	1	20.7529	12	5219	1	1	22.3765	14.8606	4698.23	919.446	0.1957	6706	7277	1665	2294	2675	4832	4205	4352	5332	4800	4946	5798	5570	3829	5196	5778	4703.44
618	unknown1012	1	1	18	15	535.103	0.983627	1	20	12	5477.75	0.999865	1	19	13.6167	5156.58	492.234	0.0954575	6199	6723	3470	4091	3771	5148	4521	4872	5893	4804	5275	5939	5642	4783	5262	6036	5151.81
619	unknown1013	1	1	18	15	405.703	0.998216	1	21.7778	17.9999	4129	0.999998	1	19.8889	16.5064	3702.19	414.447	0.111946	4655	5392	2222	3097	2894	3995	3200	3002	4273	2809	3782	4284	5100	3143	3515	4758	3757.56
625	unknown1019	1	1	24	18	1032.73	0.989338	1	24.1644	17.9999	5586.5	0.999943	1	24.0822	18.0002	4723.31	538.888	0.114091	7106	7234	1238	1347	3135	4535	3911	3887	5642	4162	4949	6058	6157	3874	5342	6973	4721.88
626	unknown102	1	1	18	0	289.914	0.999994	1	28	12	6089.25	1	1	23	4.92857	6051.19	284.8	0.0470651	5899	5181	7402	7376	6327	6973	4881	5533	6345	5482	6086	6444	5543	6320	5112	6009	6057.06
630	unknown1023	1	1	18	15	553.665	0.997383	1	20.3695	12	4227.25	0.999997	1	19.1848	13.6447	3861.45	497.272	0.128779	4879	5678	1534	2870	2293	4124	3294	3497	4264	3528	4168	4949	4170	3405	3820	5226	3856.19
634	unknown1027	0.301037	0.596563	18	0	397.748	0.976476	1	28	17.9999	3564	0.653853	1	23	18.8928	3698.3	446.475	0.120724	3750	3749	4980	5192	1792	4954	3217	3430	3928	3224	3460	3542	4117	3284	3205	3650	3717.12
636	unknown1029	0.235786	0.510223	24	12	434.871	0.696397	1	25.5652	6	5156	0.460857	1	24.7826	9.10381	4716.56	576.272	0.122181	4759	5034	3157	3151	4771	6184	4591	5078	5664	5200	4829	4762	5410	4280	4606	4320	4737.25
637	unknown103	0.587657	0.934468	18	0	2525.43	0.66187	1	28	6.63e-05	28510	0.75624	1	23	2.72e-05	24577.1	1891.98	0.0769815	25070	24671	30425	33874	25259	27161	19145	21355	23237	21549	23836	24118	22578	26204	22296	23550	24645.5
638	unknown1030	0.301037	0.596563	18	9	1995.28	0.781348	1	25.7143	6	17474.5	0.575631	1	21.8571	8.01429	15945.4	1685.28	0.105691	16008	15936	11368	11219	18753	19049	14803	17293	18950	15955	15606	15091	16881	14081	14955	16594	15783.9
639	unknown1031	0.235786	0.510223	18	9	3170.31	0.614703	1	25.2722	6.00001	43566	0.42488	1	21.6361	7.9774	39986.2	4882.75	0.122111	40767	41257	26126	26591	41227	51374	39078	42585	45710	41964	40792	40725	43583	35935	38001	35850	39472.8
644	unknown1036	1	1	18	15	451.134	0.999924	1	20	12	5257.75	1	1	19	13.6167	4991.14	466.116	0.0933886	6331	6857	3557	3605	4039	5432	4438	4097	5955	4384	5131	5561	5917	4168	5109	5205	4986.62
645	unknown1037	0.182589	0.440451	24	18	416.839	0.0773056	1	28	17.9999	3784.24	0.0742528	0.365426	26	18.1071	2947.36	305.389	0.103615	2416	2476	2451	2701	2424	2831	2756	2691	2348	3031	2629	3007	3724	3513	3903	3997	2931.12
648	unknown104	0.235786	0.510223	24	3	2182.13	0.441514	1	20.1831	6.00001	6528.5	0.339623	0.938351	22.0915	4.6644	4212.93	2610.33	0.619599	3108	2914	4577	9992	1777	10242	7531	6564	2556	501	1376	2320	2140	3799	1781	4998	4136
649	unknown1040	0.873774	1	18	9	778.525	0.758476	1	28	12	5471.25	0.935372	1	23	10.6786	5068.22	537.904	0.106133	5490	4838	2791	2236	6384	5912	4403	5071	6260	4291	5400	5934	6203	4998	5290	5231	5045.75
650	unknown1041	1	1	18	12	2675.69	0.999994	1	20	12	20884.5	1	1	19	12.0333	17863.3	2797.86	0.156626	30381	29210	1079	2432	4238	20873	21763	17398	21644	20065	19411	22418	18859	17345	15812	17597	17532.8
652	unknown1043	0.380147	0.698955	24	15	497.803	0.619215	1	28	12	5036.75	0.575889	1	26	13.6964	4326.32	757.909	0.175186	5026	4820	669	1140	4307	5127	3866	4601	5486	4336	5209	5116	5795	4251	4635	5299	4355.19
653	unknown1044	0.873774	1	18	15	450.957	0.976699	1	20	12	4890.5	0.988689	1	19	13.6167	4167.24	786.733	0.18879	5135	4211	2808	3622	2539	5554	2889	3316	4958	3065	5683	5856	4085	3327	3681	5825	4159.62
655	unknown1046	0.475047	0.810143	24	15	1499.42	0.755554	1	26.4865	12	12377.5	0.726693	1	25.2432	13.6069	10061.3	2593.6	0.257779	12753	12654	1416	1658	8446	12002	9173	9414	14445	10294	11994	12777	11464	10132	10303	13025	10121.9
657	unknown1048	0.380147	0.698955	24	0	195.692	0.996002	1	26.6465	12	2889	0.746351	1	25.3233	5.70206	2932.97	357.238	0.121801	3399	3156	3120	3282	1701	2881	3189	2857	3466	2498	2770	2822	2875	2526	3001	3149	2918.25
659	unknown105	0.182589	0.440451	24	3	2254.96	0.579154	1	20.0911	5.99998	6255.5	0.34333	0.938351	22.0456	4.66967	4212.55	2288.95	0.543364	2830	3032	4632	10300	1848	9927	7196	6051	2726	448	1227	2458	1854	3935	1679	6156	4143.69
674	unknown1063	0.873774	1	24	18	767.388	0.928157	1	26.0177	12	7597.75	0.980894	1	25.0088	15.1457	6796.92	925.791	0.136207	8119	8388	2617	4155	4146	7021	6776	7121	8093	6574	7263	8461	7152	7087	7286	8510	6798.06
675	unknown1064	1	1	18	12	463.862	0.796225	1	28	12	4180.25	0.977664	1	23	12.5952	3724.66	361.355	0.0970171	4408	4255	1395	1748	2686	4076	3801	3856	4486	3674	4085	4476	4042	3782	3993	4682	3715.31
679	unknown1068	1	1	18	12	1068.79	0.952911	1	28	17.9999	7829	0.998873	1	23	15.0595	6761.96	137.08	0.0202722	8173	10393	478	998	7424	6749	5674	6040	7721	7727	7515	7992	6996	7140	8005	9175	6762.5
684	unknown1072	1	1	24	18	258.801	0.999561	1	28	18	6179.25	1	1	26	18.1071	5603.79	320.628	0.0572163	7135	7217	3130	3603	3458	5732	5843	5907	6207	5167	5391	5881	6146	5633	6100	6838	5586.75
686	unknown1074	0.235786	0.510223	18	0	769.332	0.420495	1	27.1385	17.9999	3316.75	0.328291	0.929905	22.5692	18.7693	3428.24	881.205	0.257043	4151	3292	5749	5995	1504	3300	3406	3130	3334	2386	2824	3372	3211	3002	3344	3710	3481.88
692	unknown108	0.301037	0.596563	24	3	525.38	0.932873	1	20	6	1410	0.637485	1	22	4.675	1130.21	348.849	0.30866	614	1170	1348	2280	644	2071	1609	1316	626	139	256	737	448	973	393	3288	1119.5
697	unknown1084	0.0787266	0.260816	24	0	680.944	0.438402	1	26.4865	17.9999	5328.5	0.150701	0.575429	25.2432	21.1991	5443.03	909.023	0.167007	6432	5412	7127	7689	2905	5476	5353	5163	5462	4022	4608	5305	5522	4873	5105	5814	5391.75
703	unknown109	0.139706	0.372952	24	3	542.174	0.994732	1	20	5.99997	1668.25	0.413228	1	22	4.67498	1408.25	384.907	0.273322	793	1367	1319	2820	781	2233	2426	1233	774	134	343	982	597	1089	483	4969	1396.44
708	unknown1094	0.0579045	0.211227	18	0	713.294	0.556434	1	27.3065	17.9999	5576.5	0.142901	0.55395	22.6533	18.7929	5717.54	941.253	0.164625	6397	5705	7908	8601	3314	5534	5324	5739	5878	4983	5291	5362	5411	5498	5432	5965	5771.38
712	unknown1098	0.209188	0.502375	18	0	424.971	0.796222	1	28	12	3926.75	0.465102	1	23	4.92857	4021.68	958.406	0.23831	4562	4118	5559	5565	2108	4076	3834	3941	3981	3986	3925	3815	3981	3672	4197	3343	4041.44
713	unknown1099	0.873774	1	18	12	468.458	0.651093	1	26.9725	12	6078	0.889793	1	22.4862	12.4975	5400.96	735.213	0.136126	5788	6108	2223	2666	5827	5863	5240	5478	6383	5018	6152	6759	5725	5675	5462	5584	5371.94
718	unknown1102	1	1	18	9	525.38	0.997393	1	28	17.9999	5900.5	0.999997	1	23	13.1428	5405.38	211.686	0.0391621	6948	6451	2103	2394	3645	6151	5768	6414	6598	4683	5493	6169	5699	5662	5464	6777	5401.19
722	unknown1106	1	1	24	0	538.815	0.999498	1	28	17.9999	13019.7	1	1	26	21.3571	11715.7	273.865	0.0233759	15719	14135	4781	5853	7542	14636	12031	12414	14162	10485	12018	11987	13342	12849	12693	13195	11740.1
730	unknown1113	0.235786	0.510223	24	3	351.432	0.834916	1	26.3284	17.9999	4384	0.516812	1	25.1642	22.7569	4429.96	597.205	0.13481	5806	4635	4549	5950	1784	4718	4706	4580	4387	3711	3797	4234	4070	4798	4011	4657	4399.56
731	unknown1114	0.0579045	0.211227	24	15	3328.35	0.378725	1	28	12	25189	0.1057	0.457835	26	13.6964	20494.4	5077.3	0.247742	20624	25078	2034	3346	20090	20450	19354	22537	24945	24488	28188	23135	22436	26693	25277	22329	20687.8
739	unknown1121	1	1	24	18	380.07	0.99982	1	22.9091	17.9999	6711	1	1	23.4545	18.0097	6248.32	382.769	0.0612595	8145	7585	4020	4816	3544	6702	6348	6356	6878	5436	6352	7063	6971	6243	6329	7301	6255.56
747	unknown1129	1	1	18	12	1600.01	0.991321	1	27.3065	12	10856.8	0.999962	1	22.6533	12.5286	9686.22	778.713	0.0803939	12791	12770	3154	3499	4886	11154	9730	10045	12399	8744	10209	12075	11612	9363	9246	12866	9658.94
749	unknown1130	0.0579045	0.211227	18	6	1169.55	0.394932	1	20	6	4398.5	0.109265	0.467591	19	6.01667	3683.21	462.324	0.125522	2976	2239	4949	6254	5204	4890	3453	4047	2894	2162	1852	2340	3398	4067	3995	3315	3627.19
750	unknown1131	1	1	18	12	450.427	0.999683	1	26.4865	12	5900.75	1	1	22.2432	12.4532	5502.95	358.222	0.0650963	6248	7377	2490	3603	4087	6404	5285	5935	5980	5278	5909	6436	5502	5841	5246	6163	5486.5
752	unknown1133	1	1	24	0	107.657	0.999996	1	21.1511	17.9999	3467.5	1	1	22.5755	20.8939	3280.83	160.984	0.0490681	4040	4534	2090	2788	1829	3585	3415	3347	3314	2932	3294	3624	3484	3235	3505	3646	3291.38
755	unknown1136	1	1	18	12	575.231	0.993206	1	23.7736	17.9999	4701.5	0.999977	1	20.8868	14.8694	4228.6	443.247	0.104821	5482	5978	1747	2054	2383	4730	3929	4040	5018	4123	4794	4771	5048	3954	4598	5206	4240.94
759	unknown114	1	1	18	15	1018.94	0.898602	1	20	12	3165.75	0.994676	1	19	13.6167	1711.58	1640.98	0.958754	57	116	1155	3775	20	683	527	265	22	6289	1789	4563	5859	915	1019	77	1695.69
763	unknown1143	1	1	18	12	890.071	0.999978	1	20.0911	12	10080.2	1	1	19.0456	12.0363	9181.9	759.501	0.0827172	12030	13088	4087	5245	4182	10394	9828	9218	10734	8893	10263	10431	9561	8661	9340	9527	9092.62
764	unknown1144	1	1	24	18	420.198	0.993207	1	23.2718	17.9999	4145.75	0.999977	1	23.6359	18.0042	3692.23	329.196	0.089159	4922	4940	1902	2280	1785	4048	3600	3394	4435	3296	3691	4265	4457	3629	3872	4625	3696.31
765	unknown1145	0.182589	0.440451	18	0	411.536	0.971586	1	20	12	4332.5	0.484188	1	19	15.2	4277.64	568.969	0.13301	5191	4708	4517	5096	2432	4520	4050	4373	4774	4001	4120	4435	3919	4440	4386	4403	4335.31
766	unknown1146	0.235786	0.510223	24	15	967.145	0.794574	1	22.5575	12	8513.75	0.501119	1	23.2788	13.4665	7272.39	1414.82	0.194547	7692	9245	3286	4563	4893	8560	6513	7053	8928	8164	8399	8564	8319	7541	7788	6579	7255.44
770	unknown115	1	1	18	15	3100.66	0.97925	1	20	12	5820.25	0.999783	1	19	13.6167	3795.75	3162.46	0.833159	8	34	5161	10509	15	84	60	1459	6	1508	14337	7430	12225	63	7321	22	3765.12
772	unknown1151	0.873774	1	24	15	897.672	0.995426	1	20.7529	12	6289.25	0.991127	1	22.3765	13.462	5449.09	949.377	0.174227	7370	8638	1621	2303	2472	5955	4565	5268	6402	5099	7098	6558	6281	4842	6143	6211	5426.62
773	unknown1152	1	1	18	12	938.861	0.963762	1	25.1282	12	6651.5	0.999335	1	21.5641	12.337	5732.4	708.56	0.123606	7318	8069	1264	1788	3540	6189	5800	5436	6056	6385	7046	7119	6742	5387	6264	6592	5687.19
775	unknown1154	0.235786	0.510223	18	15	585.661	0.746584	1	20.8511	12	5233.5	0.48182	1	19.4255	13.6838	4692.4	655.093	0.139607	5402	5783	3072	3448	2793	4917	3974	4400	5710	4446	5535	5243	4992	5034	5137	5073	4684.94
776	unknown1155	1	1	18	12	508.056	0.997522	1	21.6708	12	5013	0.999997	1	19.8354	12.1036	4467.71	433.007	0.0969193	5736	5940	1819	2506	2082	4785	4746	4604	5319	4452	4955	5326	5005	4390	4372	4723	4422.5
778	unknown1157	0.587657	0.934468	18	9	955.301	0.976099	1	25.1282	12	5054.25	0.892427	1	21.5641	10.54	4596.04	669.764	0.145726	4007	5904	1824	3055	2492	5639	5378	6497	4582	5104	5825	4706	3361	4997	5076	3996	4527.69
782	unknown1160	1	1	18	12	682.712	0.997365	1	20	12	7409.5	0.999997	1	19	12.0333	6575.81	731.106	0.111181	8483	8686	3292	4264	2598	7128	6919	6557	7198	6950	7851	7639	5896	7001	7028	6341	6489.44
788	unknown1166	0.380147	0.698955	24	15	898.026	0.804248	1	25.5652	12	6187.5	0.668039	1	24.7826	13.5609	5193.33	1040.19	0.200294	6618	6014	1577	2051	3393	6190	4934	4800	6698	4657	6351	7044	6158	5485	5266	6098	5208.38
789	unknown1167	0.475047	0.810143	18	15	975.807	0.880694	1	25.2722	12	8823	0.782934	1	21.6361	14.1518	7483.57	1105.07	0.147666	9490	9809	1980	2439	4261	8263	6851	7973	8915	8300	8703	9374	8496	8165	8016	8557	7474.5
790	unknown1168	1	1	18	12	678.469	0.998802	1	21.7778	12	6099	0.999999	1	19.8889	12.1092	5551.06	354.962	0.0639449	7521	7547	2324	3063	2849	6134	5600	5155	6362	5122	6601	6311	5879	5952	5857	5953	5514.38
791	unknown1169	0.301037	0.596563	18	3	1728.88	0.353601	1	20	6	6956.5	0.3449	0.941624	19	4.43333	6247.33	1681.78	0.2692	5874	4448	7780	8150	6125	8656	7329	5716	4202	4587	3999	4492	7062	7575	7316	6288	6224.94
793	unknown1170	1	1	18	12	570.282	0.999947	1	25.7143	12	5883.5	1	1	21.8571	12.3857	5462.43	243.685	0.0446112	7515	7791	2141	2285	3337	5976	5571	5515	6103	4744	5960	6727	6168	5438	5790	6119	5448.75
795	unknown1172	1	1	18	15	227.688	0.999456	1	20	12	2797	1	1	19	13.6167	2641.48	359.813	0.136216	3456	3656	1991	2226	1142	2837	2597	2518	2700	2446	2931	3111	2921	2412	2527	2737	2638
798	unknown1175	1	1	18	12	401.637	0.995677	1	25.8651	12	4300.25	0.999991	1	21.9326	12.3986	3860.19	422.367	0.109416	4464	5146	1452	1920	2094	4628	4505	4038	4043	3779	4687	4692	4033	3948	3851	4117	3837.31
801	unknown1178	0.235786	0.510223	18	0	821.658	0.611514	1	24.5682	17.9999	5540.49	0.423426	1	21.2841	18.439	4986.96	1057.99	0.212151	5347	4296	6576	8513	2625	5211	4723	4322	4572	3608	4762	5074	6223	5980	5456	4503	5111.94
805	unknown1181	0.182589	0.440451	24	3	1270.32	0.932211	1	28	12	16438	0.471607	1	26	7.19643	16900.8	1886.09	0.111597	18060	19502	19583	22247	8465	16399	17103	18316	16883	15569	16483	16817	13286	17823	15637	15772	16746.6
809	unknown1185	1	1	24	18	342.947	0.999915	1	22.1053	17.9999	8982.75	1	1	23.0526	18.0304	8257.99	443.192	0.0536683	11251	12168	3695	4183	2908	8538	8932	8982	8773	8010	8679	10321	9607	8134	8997	9193	8273.19
816	unknown1191	0.719948	1	18	15	2636.45	0.817324	1	21.3559	12	20196.8	0.900473	1	19.678	13.7277	15735.6	3618.45	0.229954	19414	21992	3496	4903	8025	16139	14121	18151	17680	19300	21433	22374	13557	18087	16409	15999	15692.5
817	unknown1192	1	1	18	12	1291.71	0.999179	1	24.0327	17.9999	14843	1	1	21.0163	14.8758	13636.7	1110.72	0.0814509	16348	18285	6972	9100	6021	15428	13839	14648	14795	12209	15255	16369	14609	15760	14351	14652	13665.1
823	unknown1198	1	1	24	18	582.302	0.993952	1	25.7143	17.9999	4156	0.999982	1	24.8571	18.0214	3622.92	296.97	0.0819698	4602	5571	1331	1554	2679	3995	2914	3050	4059	3010	4076	4380	4692	3510	3826	4596	3615.31
827	unknown1200	1	1	18	12	432.749	0.996128	1	22.9091	12	4291	0.999992	1	20.4545	12.1753	3941.12	201.474	0.0511209	5008	5272	1966	2186	2453	3986	3952	3809	4262	3457	4484	4961	4372	3921	4143	4532	3922.75
830	unknown1203	1	1	24	18	627.204	0.992763	1	22.3291	17.9999	5618	0.999974	1	23.1646	18.0234	5038.17	412.518	0.0818786	6623	7295	2376	2918	3018	5071	4408	4920	5727	4507	5064	6409	5828	5433	5425	5786	5050.5
832	unknown1205	0.587657	0.934468	24	15	582.833	0.981945	1	20	12	3838.25	0.894326	1	22	13.475	3419.1	554.485	0.162173	3733	5341	2172	2222	2249	3274	2909	2981	3924	2715	4084	4630	4061	3098	3273	3801	3404.19
837	unknown121	0.475047	0.810143	18	3	541.997	0.561377	1	28	6	18115	0.619153	1	23	4.38095	19176.2	149.496	0.00779591	19123	15127	18397	18117	13809	19550	19749	19352	18942	15518	14117	21545	23126	26631	22773	20977	19178.3
841	unknown1213	1	1	24	18	714.531	0.947792	1	22.6735	12	7011.5	0.998613	1	23.3368	14.9268	6301.81	1059.63	0.168146	7562	8349	3316	3686	3715	6404	5925	6146	7084	6073	6646	8243	7565	6451	6649	7028	6302.62
845	unknown1217	0.873774	1	24	18	1366.48	0.958094	1	21.995	17.9999	10136	0.985957	1	22.9975	18.0342	9040.96	846.805	0.0936631	10760	13136	5068	5868	5493	8905	8240	8128	10137	7871	9707	11293	10917	9030	10096	10501	9071.88
846	unknown1218	1	1	24	18	2019.5	0.977097	1	23.52	17.9999	17222.5	0.999736	1	23.76	18.0018	15400.6	881.377	0.0572301	18491	22000	7182	8217	8853	15955	14925	14148	17444	14467	16237	19714	19129	14892	17082	17787	15407.7
849	unknown1220	0.587657	0.934468	24	15	879.641	0.626177	1	28	17.9999	10074.5	0.735857	1	26	16.4821	8506.67	2455.24	0.288626	8587	10783	646	831	7741	10271	9390	9015	10045	8924	9877	10532	11345	9478	10342	9133	8558.75
853	unknown1224	1	1	24	18	516.011	0.999476	1	23.7736	17.9999	4886.25	1	1	23.8868	18.0004	4356.4	427.449	0.0981199	5079	7335	1953	2450	2818	4258	4045	4136	4778	3853	4386	5092	5714	4110	4891	4830	4358
858	unknown1229	1	1	18	15	834.74	0.972689	1	21.7778	17.9999	7554.5	0.999624	1	19.8889	16.5064	6656.71	682.803	0.102574	8783	9402	3628	3941	3267	6316	7082	5960	8181	6410	6435	8344	8160	6648	7301	8109	6747.94
859	unknown123	0.139706	0.372952	24	21	1266.61	0.544379	1	27.3065	6.63e-05	10187	0.271991	0.831704	25.6533	24.05	10582.8	1423.17	0.134479	12228	9896	9955	8669	9260	11427	9672	8854	9850	8917	7891	11781	12961	13214	11767	11523	10491.6
866	unknown1236	0.380147	0.698955	24	6	572.756	0.891239	1	28	6	6518.75	0.705501	1	26	6.03572	6066.91	468.887	0.077286	4611	5667	7411	8100	6455	6884	6514	6222	6438	5240	5913	7325	4415	6196	4674	5516	6098.81
870	unknown124	1	1	18	6	4754.41	0.999437	1	28	6	60189.5	1	1	23	6.29762	59503.5	944.125	0.0158667	73931	51772	49249	45743	47438	70216	63706	59398	58994	51183	45768	63570	65483	81260	65587	59279	59536.1
874	unknown1243	1	1	24	18	304.409	0.999476	1	28	18	4358.5	1	1	26	18.1071	3974.29	150.974	0.0379876	4374	5478	1816	2302	4120	4196	4037	3435	4519	3255	4050	4701	5181	3571	4070	4612	3982.31
875	unknown1244	1	1	24	18	344.361	0.998221	1	26.1721	12	11093.5	0.999998	1	25.0861	15.1583	10126.4	1119.22	0.110526	11897	14100	4130	5600	4874	11327	11135	10588	11156	9771	10444	13003	11541	10255	11483	10743	10127.9
876	unknown1245	1	1	24	18	174.125	0.99998	1	28	17.9999	4221.25	1	1	26	18.1071	3883.35	45.1923	0.0116375	4511	5469	1846	2354	3249	4097	4037	3940	4249	3595	3721	4219	4518	3668	4324	4375	3885.75
880	unknown1249	1	1	18	12	2751.35	0.994699	1	20.7529	12	22137.8	0.999986	1	19.3765	12.0609	20047.4	1327.46	0.0662162	24968	29470	9687	11381	9993	20710	19594	18022	23137	18741	20471	26202	23042	18257	20790	23901	19897.9
886	unknown1254	0.475047	0.810143	24	18	3838.71	0.903139	1	27.4766	17.9999	23549	0.79209	1	25.7383	18.0825	20154.3	452.697	0.0224615	24424	30154	4464	5660	20080	17231	17646	16109	23979	20648	21581	25954	26255	21406	22321	24214	20132.9
887	unknown1255	1	1	18	15	465.63	0.999643	1	20.3695	17.9999	4044.25	1	1	19.1848	16.4702	3700.08	327.859	0.0886086	4848	5907	2012	2158	2476	3820	3565	3131	4139	3080	3940	4807	4603	3481	3836	4257	3753.75
891	unknown1259	1	1	24	18	326.33	0.998402	1	24.4321	17.9999	4373	0.999999	1	24.2161	18.0014	3938.38	145.51	0.0369468	5183	5862	1342	1654	1833	4045	4322	3901	4423	3832	4327	4782	4618	4056	4066	4752	3937.38
892	unknown126	0.301037	0.596563	18	9	1254.05	0.647593	1	28	6.00002	5066.75	0.513695	1	23	8.21429	4480.69	612.556	0.13671	3864	3151	1979	2414	5276	6324	4232	4435	5307	3549	4090	5593	5176	6683	4343	4829	4452.81
898	unknown1265	1	1	18	15	829.083	0.982008	1	20	18	8840.5	0.999837	1	19	16.4666	8212.54	840.107	0.102296	10113	11382	6158	7042	4715	8599	8227	7403	8913	7632	8376	9789	9623	8078	8745	8916	8356.94
899	unknown1266	0.182589	0.440451	24	3	521.845	0.995716	1	28	12	8270.5	0.491752	1	26	7.19643	8477.26	740.564	0.087359	10203	10134	8307	9212	4258	8700	9145	8957	8594	8335	7764	8389	7980	8657	8533	7499	8416.69
901	unknown1268	0.475047	0.810143	24	15	1383.63	0.753312	1	26.9725	12	8941.75	0.725601	1	25.4862	13.6338	7418.38	1502.65	0.202558	9164	9680	1399	1718	5693	7919	6683	7077	7999	7351	10302	10115	8647	7830	8137	9655	7460.56
907	unknown1273	1	1	18	12	440.881	0.998025	1	24.5682	17.9999	4161	0.999998	1	21.2841	14.8916	3767.35	341.625	0.0906804	4759	5583	1384	1862	2356	4093	3762	3454	4108	3828	4278	4282	4898	3581	3923	4242	3774.56
908	unknown1274	1	1	24	18	952.119	0.98006	1	22.5575	12	6867.5	0.9998	1	23.2788	14.9214	6080.91	1182.38	0.194441	8265	8486	2600	2493	3495	6340	5617	5502	6686	5937	7232	7615	7648	5680	6477	7239	6082
910	unknown1276	1	1	24	0	181.373	0.999856	1	24.1644	17.9999	3311.5	1	1	24.0822	21.0104	3043.75	182.07	0.0598176	4035	3857	2046	2186	1689	3333	3025	3081	3072	2638	3161	3320	3693	3081	2778	3694	3043.06
914	unknown128	1	1	18	6	2106.47	0.996268	1	20	5.99999	16496.5	0.999993	1	19	6.01666	13115.6	3354	0.255727	8120	22290	8107	7846	20285	27204	9131	9366	10219	9850	13198	7726	16498	11848	11632	10026	12709.1
932	unknown1296	0.587657	0.934468	24	15	1294.01	0.84092	1	27.4766	12	11545.2	0.8425	1	25.7383	13.6636	9705.02	1960.04	0.201962	12254	12869	1635	2045	8767	10699	8634	9425	11860	10243	12750	11328	12404	9501	10917	10984	9769.69
937	unknown130	0.235786	0.510223	18	6	4881.51	0.999966	1	28	6	19211.2	0.576446	1	23	6.29762	15469.1	3042.04	0.196653	17575	10099	7029	6643	24468	21251	15882	15244	14363	11055	10936	14144	21919	20750	17379	17092	15364.3
939	unknown1301	1	1	24	18	470.049	0.959629	1	24.7059	17.9999	4444.25	0.999174	1	24.3529	18.0038	3974.13	157.655	0.0396704	4923	5249	1721	2167	2280	4365	3563	3955	4598	3880	4600	4480	4663	4080	4190	4844	3972.38
940	unknown1302	0.380147	0.698955	24	18	670.337	0.827051	1	28	17.9999	5597.25	0.67819	1	26	18.1071	4716.88	107.085	0.0227025	5916	5654	1705	2195	3002	5013	4466	4768	5416	4865	5122	4868	6005	4663	5797	5924	4711.19
946	unknown1308	1	1	24	0	658.14	0.981675	1	20	17.9999	9412.5	0.999831	1	22	20.9	8667.12	979.872	0.113056	12985	13059	5907	6916	2903	8435	8102	8714	9405	8231	8861	8919	10183	7975	9046	10446	8755.44
949	unknown1310	1	1	18	12	467.044	0.998335	1	22.5575	12	4974	0.999999	1	20.2788	12.1535	4582.45	258.996	0.056519	5746	5955	2612	2559	3456	4882	4118	4358	5365	4255	5542	4734	5884	3938	4668	4853	4557.81
956	unknown1317	0.719948	1	24	21	506.996	0.992443	1	22.9091	18	7755.25	0.954698	1	23.4545	19.4756	7056.28	588.755	0.083437	9047	9438	4817	5260	4181	6903	6446	7617	7451	7179	7089	6677	8302	7535	7292	7892	7070.38
959	unknown132	1	1	18	9	103.238	0.998112	1	20	6	6452.25	0.999998	1	19	7.6	5458.21	738.354	0.135274	5270	4648	4069	5327	5411	11770	4251	4377	5841	5344	4372	4220	5455	4943	4868	4843	5313.06
962	unknown1322	0.873774	1	24	21	276.479	0.872575	1	25.4179	17.9999	3258	0.969236	1	24.7089	19.5591	2831.11	313.914	0.11088	3585	3426	1771	2296	1883	2754	2462	2776	2988	2663	2680	2835	3972	2637	3083	3340	2821.94
966	unknown1326	1	1	24	0	353.553	0.999988	1	27.4766	18	12912.7	1	1	25.7383	21.2998	11833.3	440.408	0.0372177	15074	15925	6191	7811	5139	13192	12166	13576	11765	12632	12173	11488	12259	13583	13538	12271	11798.9
976	unknown1335	0.380147	0.698955	18	3	725.138	0.974249	1	20	6	5429	0.738229	1	19	4.43333	5223.33	860.552	0.164752	5354	3874	4855	7257	3631	7202	5525	5358	3436	3672	4952	4581	5921	7500	5860	4412	5211.88
980	unknown1339	0.0579045	0.211227	18	0	2090.38	0.378886	1	24.0327	17.9999	12173.7	0.105736	0.457835	21.0163	18.3786	10548.5	2169.13	0.205634	14086	11308	12107	13065	4872	11674	9086	10386	11848	7256	8627	10285	14225	10621	10910	12939	10830.9
981	unknown134	0.873774	1	18	9	1047.93	0.997855	1	28	6.00002	5339	0.991421	1	23	8.21429	4299.82	615.443	0.143132	2540	2534	2594	3127	9034	4632	3489	4201	4856	3193	4019	3678	5715	5231	5201	4305	4271.81
990	unknown1348	1	1	18	12	651.952	0.989309	1	22.7907	12	6076	0.999943	1	20.3953	12.1678	5549.57	330.375	0.0595317	6243	7777	2755	3417	3897	5515	5106	5542	6063	5499	6450	6292	6430	5070	5439	6809	5519
991	unknown1349	1	1	18	15	212.132	0.99978	1	20	17.9999	6060.75	1	1	19	16.4666	5646.68	459.643	0.0814005	7243	8142	3689	4197	2758	5828	5504	6221	5791	5948	6141	5906	6124	5589	5764	6766	5725.69
997	unknown1354	1	1	18	12	3131.42	0.924895	1	22.4427	12	20498	0.997106	1	20.2214	12.1466	17836.7	2252.98	0.126311	20503	21372	9053	9924	8664	20344	17196	19371	20032	18128	21981	21851	18632	16794	18598	19470	17619.6
998	unknown1355	0.719948	1	18	0	1054.47	0.817584	1	26.0177	17.9999	5396	0.900573	1	22.0088	18.6177	5278.83	913.13	0.17298	6000	4618	7677	7792	2752	5423	4807	5198	6208	4063	4425	5165	6029	4769	5828	4958	5357
1003	unknown136	0.182589	0.440451	18	6	277.893	0.99608	1	20	6	4399	0.491866	1	19	6.01667	3153.94	1330.71	0.421918	2599	1975	2159	2308	10066	2590	2094	2846	2185	2007	2115	2151	3343	3131	3428	2886	2992.69
1004	unknown1360	0.0787266	0.260816	18	12	2747.46	0.449047	1	23.1496	12	18512.2	0.153512	0.582566	20.5748	12.1909	15732.9	2861.25	0.181864	16738	17634	7506	9178	14429	17180	13376	16672	18747	18366	19213	17723	16632	13321	16227	14737	15479.9
1005	unknown1361	0.873774	1	18	15	601.571	0.98006	1	21.4599	12	4774.5	0.98915	1	19.7299	13.7371	4224.21	565.558	0.133885	5173	5923	1995	2306	2652	4210	3716	4381	5063	4219	5124	4692	4978	3957	4549	4541	4217.44
1016	unknown1371	1	1	24	18	486.136	0.99033	1	21.7778	17.9999	6656.25	0.999953	1	22.8889	18.0425	6123.78	416.116	0.0679509	7942	7655	4011	4293	3645	6604	5493	6085	6830	6157	6445	6468	7208	5976	6511	6930	6140.81
1017	unknown1372	1	1	18	12	1283.93	0.967623	1	24.7059	12	8883	0.99947	1	21.3529	12.3034	8030.09	652.94	0.0813116	9716	9564	4121	4673	5468	9157	7198	8366	9023	7808	9641	9060	9295	7712	8519	8437	7984.88
1028	unknown1382	0.105571	0.313957	18	3	984.646	0.937236	1	20	6	8799	0.327823	0.929905	19	4.43333	8270.55	1506.06	0.182099	9001	6416	6953	9221	7791	10478	7972	8955	6791	5750	7373	7436	8862	9895	9874	9240	8250.5
1032	unknown1386	1	1	18	12	435.047	0.999881	1	20	12	5145.75	1	1	19	12.0333	4696.82	435.519	0.0927262	5098	6317	2504	3650	2560	5496	4653	5207	4593	5255	5810	4925	4897	4423	4658	4280	4645.38
1033	unknown1387	0.0579045	0.211227	18	0	528.032	0.452578	1	25.5652	17.9999	2526.75	0.121643	0.50068	21.7826	18.5596	2376.67	634.214	0.266849	2769	2140	3959	3971	1210	2282	2122	1997	2645	1655	1990	2151	2971	2082	2478	2576	2437.38
1038	unknown1391	1	1	18	6	97.2272	1	1	28	18	5754	1	1	23	11.2262	5363.64	35.5759	0.00663279	7245	6697	3087	3127	2330	6793	5819	5775	5681	4412	5202	6656	5895	6014	5795	5312	5365
1045	unknown1398	1	1	18	12	670.337	0.994653	1	23.0287	12	5442.25	0.999986	1	20.5144	12.183	4830.96	483.947	0.100176	5840	6377	2084	2506	2220	5628	4876	5077	4902	5108	6034	5725	4508	5785	5399	4531	4787.5
1049	unknown1400	0.873774	1	24	15	1779.08	0.851468	1	24.8451	12	18172.8	0.964009	1	24.4225	13.53	15313.1	3133.34	0.204618	16786	20202	5558	6462	8610	18395	14084	16502	17220	16011	19890	19570	17544	15185	17553	15823	15337.2
1051	unknown1402	1	1	18	9	321.38	0.996507	1	28	5.99999	4111.25	0.999994	1	23	8.21428	3937.06	168.954	0.0429137	4046	4891	1050	1220	5927	3897	3174	3447	4034	3405	3876	4404	8146	3241	3846	4266	3929.38
1053	unknown1404	0.873774	1	24	6	179.075	0.9928	1	28	12	3841.75	0.990804	1	26	8.82144	3841.92	259.153	0.067454	3770	4135	4618	5114	2075	3672	4136	3965	3966	3941	3745	3715	3344	3731	3462	3708	3818.56
1062	unknown1412	1	1	18	12	1391.59	0.733274	1	28	12	16165.2	0.960762	1	23	12.5952	14069	2075.79	0.147543	17436	15773	958	1479	13809	17406	14599	14095	17182	14182	16108	17189	17857	15819	14672	15681	14015.3
1065	unknown1415	1	1	24	18	722.31	0.950074	1	28	17.9999	5276.5	0.998732	1	26	18.1071	4463.8	163.753	0.0366846	6129	5859	857	925	3533	5213	4023	4013	5239	4056	4982	5625	6047	4307	5107	5645	4472.5
1067	unknown1417	1	1	24	18	187.737	0.991686	1	28	17.9999	4098	0.999965	1	26	18.1071	3802.41	174.577	0.0459122	4696	4643	1916	2016	3062	3919	3962	4022	4592	3755	3806	4206	4682	3662	4142	3906	3811.69
1068	unknown1418	0.235786	0.510223	24	15	431.158	0.679742	1	22.9091	12	4540	0.453715	1	23.4545	13.4724	3812.52	855.528	0.2244	4004	4591	2023	2006	2318	4186	4071	3856	4659	4293	4404	4804	4579	3367	3890	3823	3804.62
1072	unknown1421	1	1	18	15	343.654	0.999997	1	21.5648	17.9999	3674	1	1	19.7824	16.4988	3336.72	292.227	0.087579	4729	5307	1686	1696	1518	3838	3403	3148	3887	2577	3069	4479	4224	2912	3310	4250	3377.06
1075	unknown1424	0.139706	0.372952	24	12	689.429	0.505437	1	27.1385	12	8967.25	0.257775	0.805896	25.5692	12.0454	7337.36	1806.36	0.246187	8395	8106	1108	1657	6229	8594	7930	8950	9352	7872	9148	9497	8680	6814	8450	8125	7431.69
1077	unknown1426	0.475047	0.810143	18	15	533.159	0.994128	1	20	12	4195.25	0.82656	1	19	13.6167	3813.11	702.225	0.184161	4724	4761	3440	3502	1787	4013	3686	3314	4773	2979	4288	4741	4092	3098	3330	4373	3806.31
1082	unknown1430	1	1	24	18	1059.42	0.874777	1	25.4179	17.9999	5004.5	0.99181	1	24.7089	18.0148	4257.02	291.323	0.0684336	5558	5777	1355	1657	3178	3674	3929	3633	5240	3366	5144	5483	5224	4354	4814	5626	4250.75
1085	unknown1433	1	1	24	18	360.978	0.995173	1	28	17.9999	4690.25	0.999988	1	26	18.1071	4256.76	38.9685	0.0091545	5078	5112	2114	2851	2143	4870	4247	4837	4758	3788	4782	4734	4772	4169	4806	5014	4254.69
1087	unknown1435	0.139706	0.372952	24	12	974.923	0.345544	1	26.3284	12	8830.25	0.194588	0.675132	25.1642	12.0257	6975.23	2015.83	0.288998	6708	8209	1271	1530	5664	8897	8026	7367	9189	7842	9511	8779	8092	6266	7490	8011	7053.25
1088	unknown1436	1	1	18	9	205.768	0.719868	1	28	18	2897.5	0.95648	1	23	13.1428	2614.98	87.3114	0.0333889	2501	2893	1477	1671	1913	3163	2752	2747	3065	2588	2791	2661	2960	2828	2922	2880	2613.25
1101	unknown1448	1	1	24	0	146.725	0.954159	1	22.6735	17.9999	2445.5	0.998933	1	23.3368	20.9316	2275.87	180.897	0.0794848	2847	2514	1979	2185	1458	2408	2241	2176	2315	1972	2203	2423	2738	2085	2349	2610	2281.44
1106	unknown1452	0.380147	0.698955	24	3	196.929	0.639194	1	28	17.9999	4086.25	0.586753	1	26	22.9821	4725.13	1143.99	0.242107	4810	3936	8167	9934	2138	4300	4354	4152	4075	3499	4211	4076	3863	4247	4048	4187	4624.81
1115	unknown1460	0.475047	0.810143	18	15	742.109	0.859372	1	20.5594	12	4379.5	0.773984	1	19.2797	13.6597	3863.26	652.222	0.168827	5247	4757	2040	2562	2333	3513	3410	3448	4025	3603	4897	4993	4375	3613	3997	4885	3856.12
1124	unknown1469	0.873774	1	18	15	255.619	0.998261	1	20	12	2692	0.991469	1	19	13.6167	2621.8	270.077	0.103012	3086	3013	2619	2668	1604	2683	2546	2464	2665	1979	3010	3114	2967	2253	2287	2949	2619.19
1127	unknown1471	1	1	18	12	1007.8	0.878692	1	26.0177	12	5330.5	0.992325	1	22.0088	12.4118	4383.67	917.703	0.209346	5494	5642	461	527	3545	5403	4339	3989	5776	3750	5729	6067	5780	3832	3796	5243	4335.81
1129	unknown1473	1	1	18	12	442.295	0.99829	1	20	12	6058.5	0.999999	1	19	12.0333	5588.38	353.419	0.0632417	7223	7226	3545	3766	2571	5632	5706	5777	6187	5710	5835	6502	5418	5976	5412	6260	5546.62
1135	unknown1479	0.653803	1	24	18	434.694	0.713215	1	28	17.9999	3835.75	0.822054	1	26	18.1071	3212.35	368.511	0.114717	3812	3461	900	1150	2959	3665	2841	3454	4197	2765	3686	3478	4285	3454	3598	4006	3231.94
1143	unknown1486	0.235786	0.510223	18	0	853.831	0.986573	1	27.4766	12	8891.5	0.571862	1	22.7383	4.96531	8837.56	1631.91	0.184656	10463	9688	9695	10842	4392	8828	8720	9353	9605	8484	8217	9260	8072	9442	8781	8235	8879.81
1152	unknown1494	1	1	18	12	1506.67	0.979867	1	23.9024	12	9482.25	0.999796	1	20.9512	12.2429	8173.16	1154.98	0.141314	9669	11711	2607	2759	6384	8944	8127	7281	10215	7963	9591	10160	10920	6960	8203	7810	8081.5
1167	unknown1507	1	1	18	12	1864.29	0.969865	1	26.9725	12	9758	0.999541	1	22.4862	12.4975	8282.02	1126.17	0.135978	10943	12453	669	744	8613	8548	6613	6702	11495	7959	9617	9961	11989	7166	9127	9202	8237.56
1174	unknown1513	1	1	24	18	400.93	0.997405	1	23.6461	17.9999	6791.5	0.999997	1	23.8231	18.001	6220.56	466.324	0.0749649	8108	7664	4149	4353	3775	6509	6454	5789	7412	6280	5421	6493	6685	7009	6588	6884	6223.31
1186	unknown1524	0.873774	1	24	18	804.864	0.9512	1	28	17.9999	6877	0.984864	1	26	18.1071	6068.85	322.904	0.0532068	7280	7226	3603	3715	4404	6804	5085	5987	6964	4857	6375	7019	7350	5857	6952	7349	6051.69
1188	unknown1526	0.475047	0.810143	18	6	2021.8	0.994444	1	28	6.00002	10158.2	0.826672	1	23	6.29763	8960.47	639.575	0.0713774	9079	5521	6183	4619	13739	10230	7666	8998	7727	4395	6938	9216	10530	12080	11260	14834	8938.44
1191	unknown1529	1	1	18	0	968.206	0.97394	1	23.7736	17.9999	12032	0.999657	1	20.8868	18.3505	11582.6	793.623	0.0685187	12467	10760	13462	13142	8405	13252	10638	11283	10381	11216	11127	12788	11435	12666	12922	11105	11690.6
1198	unknown1535	1	1	18	0	5034.25	0.938598	1	23.9024	17.9999	69760.7	0.998075	1	20.9512	18.3644	66202.6	4135.21	0.0624629	71806	60711	74296	72605	51087	73346	62517	66698	59931	59462	63687	72863	66566	75128	72475	64874	66753.2
1200	unknown1537	1	1	18	6	1021.42	0.879704	1	28	6	5553.25	0.992456	1	23	6.29762	5086.3	367.966	0.0723445	4740	3153	3784	2818	5094	6065	5304	5750	5150	2825	4037	5770	7100	6483	6862	6243	5073.62
1204	unknown1540	1	1	18	12	356.382	0.994716	1	20	12	4623.75	0.999986	1	19	12.0333	4280.98	292.923	0.0684243	4920	5042	3288	3188	2996	4210	4224	4369	4721	3730	4481	5563	4635	4036	4416	4123	4246.38
1205	unknown1541	0.235786	0.510223	18	6	45085	0.999796	1	28	6.00002	181548	0.576388	1	23	6.29763	149298	22391.8	0.14998	146015	83977	100080	70704	240181	179478	152310	154221	112174	77812	115943	156209	191540	203223	195621	196940	148527
1206	unknown1542	0.105571	0.313957	18	6	1472.02	0.979798	1	20	6	6127.25	0.338116	0.938351	19	6.01667	4813.04	1672.43	0.347478	3508	2667	3467	2263	8276	5588	5451	5194	3747	3118	4030	5087	4732	5469	5631	5538	4610.38
1208	unknown1544	1	1	18	9	945.932	0.952234	1	28	6.00002	4884.5	0.998841	1	23	8.21429	4367.45	268.167	0.0614012	4281	2503	3323	2302	3803	5582	5501	4652	3933	2603	4268	5619	5019	5498	5540	5257	4355.25
1211	unknown1547	0.139706	0.372952	18	6	1923.68	0.99961	1	28	6.00002	7249.25	0.414571	1	23	6.29763	5860.62	948.558	0.161853	5781	3289	3327	2715	8123	8473	6195	6206	4623	3480	4198	5241	8372	7328	7370	8526	5827.94
1216	unknown1551	0.139706	0.372952	18	6	2033.46	0.99889	1	28	6.00002	8819.75	0.414373	1	23	6.29763	7497.08	880.206	0.117407	7412	4227	5227	4484	8061	10741	8545	7932	5057	5183	6086	7630	9823	10428	9908	8724	7466.75
1217	unknown1552	0.719948	1	24	18	768.625	0.903028	1	28	12	6425.75	0.930066	1	26	15.3214	5667.52	749.999	0.132333	6662	7911	1761	1988	5301	4950	5803	5149	6804	5810	6092	6997	6519	6263	6184	6533	5670.44
1218	unknown1553	0.587657	0.934468	18	6	790.545	1	1	28	5.99998	6831.25	0.900063	1	23	6.29761	6335.82	297.819	0.0470056	5663	3670	6440	6124	3344	8402	8406	7173	5209	5187	5687	6677	6336	8827	8132	5932	6325.56
1219	unknown1554	0.380147	0.698955	18	15	474.822	0.75376	1	25.2722	12	4635	0.64468	1	21.6361	14.1518	4003.54	500.031	0.124897	4814	4783	1678	1825	3275	4151	3865	3748	5338	4136	4521	4545	4431	4389	4272	4220	3999.44
1220	unknown1555	1	1	18	15	380.423	0.995224	1	28	12	4906.75	0.999989	1	23	14.5119	4893.19	1012.79	0.20698	4713	4542	7080	7483	2188	4392	4816	5264	5251	5142	4894	4340	3830	5307	4881	4119	4890.12
1223	unknown1558	0.380147	0.698955	18	6	2944.39	0.845894	1	28	5.99999	14018.5	0.686398	1	23	6.29761	12256.1	1777.83	0.145057	9734	6808	7299	7485	17521	15017	10530	13006	12953	9566	9628	11733	17188	16316	15334	15000	12194.9
1224	unknown1559	0.301037	0.596563	24	15	625.082	0.806161	1	21.8859	12	10301.5	0.586324	1	22.9429	13.4595	9177.69	1337.85	0.145772	10026	10321	6062	6646	6948	10611	8792	8909	10754	9749	9790	10913	9271	8516	9559	9615	9155.12
1225	unknown156	0.235786	0.510223	18	6	429.567	0.92746	1	28	5.99998	3635.75	0.551109	1	23	6.29761	3485.54	113.024	0.0324264	3765	3056	2765	2479	4618	3719	3073	3133	3248	2488	2512	3009	4716	4589	4526	4135	3489.44
1226	unknown1560	1	1	18	12	759.609	0.987778	1	20	12	5488	0.999925	1	19	12.0333	4845.19	627.993	0.129612	5686	5811	2815	3202	2587	5701	4585	5421	5678	4665	5603	6006	4639	4107	4696	5134	4771
1232	unknown1566	0.301037	0.596563	18	3	2674.81	0.990018	1	26.8085	6.63e-05	42057.2	0.658816	1	22.4043	1.86705	42321.3	5638.38	0.133228	46316	34009	42078	45826	29703	52824	40456	43674	37243	38517	37294	42787	43537	50747	49115	45811	42496.1
1235	unknown1569	0.105571	0.313957	18	6	1966.99	0.999861	1	28	5.99999	9282.75	0.3429	0.938351	23	6.29762	7925.64	809.4	0.102124	8120	5064	5317	5316	9863	10847	7716	8705	6776	5209	5923	7163	10137	9861	9398	10949	7897.75
1237	unknown1570	0.235786	0.510223	18	6	1375.5	0.999136	1	28	5.99998	5161	0.576163	1	23	6.29761	4214.65	608.422	0.144359	4256	2253	2418	1896	5780	6126	4243	4495	3351	2529	2816	3721	6198	5597	5055	6365	4193.69
1238	unknown1571	0.235786	0.510223	18	6	2485.83	0.977216	1	28	6.00002	13494.2	0.568634	1	23	6.29763	12112.7	630.427	0.0520467	12420	6581	8964	7445	10986	17923	12092	12976	8942	8054	9460	12086	16447	17465	15641	15974	12091
1239	unknown1572	0.301037	0.596563	18	6	2174.35	0.999481	1	28	6	10850.5	0.662251	1	23	6.29762	8883.32	1754.42	0.197496	8266	5122	5920	3900	15842	10876	7429	9255	7825	5684	6676	10127	11925	10283	10260	11776	8822.88
1240	unknown1573	0.182589	0.440451	18	6	4270.57	0.999315	1	28	5.99998	16157.2	0.492872	1	23	6.29761	13176.9	1924.07	0.146018	13135	6950	7436	6364	18458	19384	12573	14214	10638	7724	9139	11342	19149	17230	15993	20041	13110.6
1241	unknown1574	0.139706	0.372952	18	6	40881.4	0.999904	1	28	6.00001	180768	0.414652	1	23	6.29763	148230	23154.6	0.156208	145959	90700	97604	65965	242990	187548	132986	159547	123213	95445	106967	137306	204695	172612	182028	213346	147432
1243	unknown1576	0.587657	0.934468	24	15	670.337	0.931491	1	28	17.9999	5340.5	0.877248	1	26	16.4821	4672.66	4.11425	0.000880494	4762	6967	1338	1826	3770	4774	4360	4768	5687	4750	5488	4912	6295	4321	5360	5386	4672.75
1251	unknown1583	1	1	18	12	481.54	0.931629	1	21.0501	12	3067	0.997608	1	19.5251	12.0737	2635.63	426.186	0.161702	2667	3313	1663	1371	2265	3165	2257	2361	3007	2181	3717	3363	3173	1978	2359	2579	2588.69
1252	unknown1584	0.139706	0.372952	24	15	249.609	0.721761	1	24.8451	12	2774.75	0.332177	0.93702	24.4225	13.53	2537.73	238.66	0.0940449	2666	2669	1941	1859	2078	2737	2357	2501	2934	2595	2795	2775	3260	2259	2676	2531	2539.56
1262	unknown1593	0.587657	0.934468	24	9	307.415	0.999998	1	20	12	3526.75	0.900062	1	22	10.725	3255.76	233.828	0.0718198	3475	3506	2728	2978	1259	3519	3910	4157	3654	3898	3142	3413	2800	3603	3162	2581	3236.56
1268	unknown1599	1	1	18	15	225.39	0.959842	1	28	12	2677	0.999183	1	23	14.5119	2834.55	553.907	0.195413	2439	2188	4760	5556	1569	2811	2464	2560	2839	2530	2511	2828	2545	2698	2498	2530	2832.88
1272	unknown1601	0.301037	0.596563	24	6	394.566	0.999968	1	28	12	7735.25	0.662427	1	26	8.82143	7567.2	155.498	0.020549	7863	7764	8259	9761	3816	8090	7937	8872	7835	8031	7536	7539	6002	7867	7294	6385	7553.19
1279	unknown1608	0.139706	0.372952	24	0	3192.23	0.61687	1	23.9024	6.63e-05	44053	0.297436	0.876687	23.9512	3.32e-05	41528.1	3765.62	0.0906763	44065	37808	47563	46776	36415	44282	36876	42004	39708	40026	35187	40555	41200	40672	44395	47015	41534.2
1290	unknown1618	0.873774	1	24	21	260.569	0.932588	1	25.1282	17.9999	2556	0.981696	1	24.5641	19.5447	2226.91	286.786	0.128782	2782	2742	1800	1671	1734	2373	1739	1955	2306	1655	2244	2298	3232	1988	2056	2948	2220.19
1291	unknown1619	1	1	18	12	2731.02	0.91747	1	24.1644	12	17875.2	0.996497	1	21.0822	12.2621	15448.1	2116.34	0.136997	18704	18887	6324	6662	9103	17016	15508	16449	18852	15189	18602	18858	17514	14962	14641	17321	15287
1296	unknown1623	0.380147	0.698955	24	3	310.597	0.796038	1	28	12	4086.25	0.664325	1	26	7.19643	4469.38	935.384	0.209287	4870	4057	6709	7616	1652	4562	4207	4264	4447	3676	4038	4184	3788	3795	4517	3904	4392.88
1300	unknown1627	0.475047	0.810143	24	9	564.271	0.999998	1	28	12	6994.75	0.828644	1	26	10.4464	6572.28	270.985	0.0412315	6309	6432	7567	7583	3802	7553	7108	7348	6543	6966	7208	7262	5727	6151	6230	5735	6595.25
1301	unknown1628	0.105571	0.313957	18	0	298.753	0.868358	1	26.6465	17.9999	1588.5	0.310728	0.901175	22.3233	18.7014	1599.14	381.686	0.238681	1725	1552	3205	2097	757	1680	1309	1297	1385	1231	1738	1694	1927	1211	1407	1809	1626.5
1302	unknown1629	0.873774	1	24	6	345.245	0.977939	1	28	12	4901	0.98886	1	26	8.82143	4994	431.236	0.0863508	4698	5077	6649	8568	1963	4606	5156	6094	4975	4839	4833	4957	3758	4791	4665	3653	4955.12
1303	unknown163	0.0787266	0.260816	18	3	114.728	0.868801	1	28	6	2351	0.251869	0.796047	23	4.38095	2347.62	184.898	0.0787597	2383	1980	2140	2049	3033	2379	1884	2108	2357	1621	1981	2045	3093	3018	2906	2543	2345
1306	unknown1632	0.105571	0.313957	24	0	504.167	0.80782	1	27.4766	17.9999	7040.25	0.295229	0.873183	25.7383	21.2997	7336.57	972.236	0.132519	7833	7754	9317	9996	3463	7047	7232	7783	7694	6319	6391	7182	7497	6565	7352	6747	7260.75
1311	unknown1637	0.301037	0.596563	24	3	179.428	0.869162	1	26.8085	17.9999	3843	0.612457	1	25.4043	22.8184	3933.72	510.599	0.129801	4050	3741	5091	5781	1819	4124	4015	3925	3906	3243	3420	3950	3496	3922	3897	4057	3902.31
1313	unknown1639	0.719948	1	24	15	467.398	0.614199	1	28	12	6020.75	0.803025	1	26	13.6964	5133.04	996.642	0.194162	5180	5994	1063	1292	3150	6399	5638	6395	6095	5993	6205	5790	5780	6133	6651	4978	5171
1334	unknown1658	1	1	18	0	1311.33	0.993742	1	20	17.9999	29064.2	0.99998	1	19	18.05	28011.9	1270.92	0.0453707	29626	25909	30624	31239	21538	29397	23873	31668	27515	26895	28696	29372	28641	27027	29603	30986	28288.1
1335	unknown1659	1	1	24	0	130.108	0.998132	1	20	17.9999	5691.75	0.999998	1	22	20.9	5491.04	193.718	0.0352789	5616	4936	5723	6289	3956	5888	4753	6106	5511	5467	5486	5638	5787	5191	5601	6188	5508.5
1342	unknown1665	0.139706	0.372952	18	6	4829.19	0.999991	1	28	5.99999	13863.8	0.414676	1	23	6.29761	9827.08	2723.51	0.277144	10183	4464	1527	1317	20656	14419	7848	12532	6032	3845	4806	7966	16830	17856	12561	12890	9733.25
1344	unknown1667	0.182589	0.440451	18	6	2791.3	0.999752	1	28	6.00001	8448.25	0.493007	1	23	6.29762	6277.35	1541.12	0.245505	6406	2962	1416	1132	11574	9266	4659	8294	4717	2677	3891	5014	10066	10010	8629	8875	6224.25
1346	unknown1669	0.301037	0.596563	18	6	229.103	0.999917	1	20	6	4388.25	0.662409	1	19	6.01667	4269.41	131.314	0.0307569	4559	4223	3956	3799	4640	4243	3839	4831	4437	3806	3764	3804	4246	4045	4550	5314	4253.5
1350	unknown1672	0.0579045	0.211227	18	3	671.398	0.999072	1	20	5.99998	4922.5	0.222719	0.733072	19	4.43332	4421.78	1265.24	0.286138	4992	2155	4137	3928	3602	6302	4969	4817	3666	3122	3316	3597	5755	5340	5106	5675	4404.94
1352	unknown1674	0.587657	0.934468	24	21	990.126	0.846126	1	23.7736	17.9999	21188.7	0.844647	1	23.8868	19.4933	20142.6	1216.03	0.0603707	21281	19459	20643	21449	15873	21537	18378	20384	20004	18870	18824	20920	19359	20120	22334	22942	20148.6
1353	unknown1675	0.0579045	0.211227	18	6	704.278	0.811417	1	20	6	4322.75	0.190661	0.667696	19	6.01667	3688.11	579.039	0.157002	3572	2662	3144	4696	2706	5605	3901	5079	2541	2533	2792	3222	3634	4163	4248	3389	3617.94
1358	unknown168	0.719948	1	18	0	461.387	0.975307	1	27.1385	17.9999	4934.5	0.950443	1	22.5692	18.7693	4981.9	483.206	0.0969922	5218	4320	6098	7128	4813	5010	4393	4058	5626	4128	5043	4608	4374	5783	5033	4548	5011.31
1360	unknown1681	1	1	18	3	1745.85	0.999432	1	24.9858	6.63e-05	13605.5	1	1	21.4929	1.79111	11476	1781.94	0.155275	11677	4994	14176	23575	4225	14821	12329	11717	9880	9823	11687	8660	10383	13545	11406	12416	11582.1
1361	unknown1682	1	1	24	0	335.522	0.999931	1	23.1496	17.9999	4674.75	1	1	23.5748	20.9527	4433.58	429.866	0.0969567	4507	2372	5485	6955	2102	5364	4436	4068	4450	4232	4649	3754	4634	4794	4092	5179	4442.06
1366	unknown1687	1	1	18	9	627.734	0.984926	1	25.5652	5.99999	8040.25	0.999886	1	21.7826	8.00177	7673.65	514.878	0.0670969	7676	7127	6835	6239	6591	9713	7301	8556	9718	7017	7413	7588	7419	7010	8092	7668	7622.69
1400	unknown1717	0.380147	0.698955	18	6	17496.8	0.996448	1	20	5.99999	110491	0.746516	1	19	6.01666	60496	57645	0.952873	30056	8445	1185	1152	275648	109313	28040	28963	26548	8912	16239	32101	141145	65696	24236	58491	53510.6
1412	unknown1728	0.380147	0.698955	18	6	3355.22	0.996721	1	28	6	21947.2	0.746617	1	23	6.29762	19060.3	900.901	0.0472659	19170	14917	9221	5554	38971	19883	12121	16814	17059	10449	8538	16096	36924	27546	23324	27881	19029.2
1417	unknown1732	0.235786	0.510223	18	6	3978.36	0.999998	1	28	5.99998	15334.2	0.576457	1	23	6.29761	11326.3	2737.93	0.241733	11727	6150	2523	1790	27651	15279	8094	10313	10132	4195	5081	9164	23118	11227	13211	20056	11231.9
1418	unknown1733	0.0787266	0.260816	18	6	1982.73	0.999977	1	20	5.99999	6818.5	0.278827	0.840064	19	6.01666	4864.66	2445.01	0.502606	4321	2197	1135	751	12117	7213	3566	4378	3934	1409	1666	3140	10202	5233	5163	6669	4568.38
1421	unknown1736	0.235786	0.510223	18	6	7954.07	1	1	28	5.99999	30711.5	0.576457	1	23	6.29761	21959.4	5832.85	0.26562	21899	10676	4126	2837	59492	30447	14414	18493	18975	7108	8607	16129	48097	23109	24476	39250	21758.4
1422	unknown1737	0.139706	0.372952	18	6	3600.94	1	1	20	6	12949.8	0.414678	1	19	6.01666	9363.64	4657.47	0.4974	8442	3573	1373	908	25203	12897	6037	7662	6904	2194	2606	5611	24320	10037	10110	12911	8799.25
1424	unknown1739	0.719948	1	18	9	2696.55	0.999897	1	28	5.99999	8660.5	0.956481	1	23	8.21428	6253.09	1569.02	0.250919	4244	1553	549	3459	3433	8648	17785	4776	1908	2536	10142	7896	7558	14915	6678	2827	6181.69
1428	unknown1742	1	1	18	6	910.577	1	1	20	5.99998	5142.25	1	1	19	6.01666	4446.91	888.939	0.1999	4114	4499	1794	3231	2864	7408	5891	4406	4035	1623	4075	5041	4094	4527	2948	8877	4339.19
1429	unknown1743	1	1	18	6	48399.7	0.999989	1	20	6.00002	220584	1	1	19	6.01668	176752	52182.6	0.295231	173765	186632	52008	95893	117629	332832	231044	200831	159770	54615	153574	204575	155223	155470	103247	349746	170428
1430	unknown1744	1	1	18	6	51180.7	1	1	28	6.00001	268438	1	1	23	6.29762	238637	1353.7	0.00567264	183711	292619	77264	145829	163619	419289	281135	209711	131896	61753	184784	250390	171149	151533	118799	975456	238684
1431	unknown1745	0.719948	1	18	6	4206.22	1	1	28	6	21159.2	0.956506	1	23	6.29762	18558.4	977.187	0.0526547	15950	21939	7017	9860	15795	30035	21110	17697	13406	7737	14274	20098	16233	15938	12628	56679	18524.8
1432	unknown1746	0.235786	0.510223	24	3	266958	0.985079	1	20	6	1047699	0.571348	1	22	4.675	925476	180925	0.195494	740163	959414	820455	1527992	612485	1412378	1365462	800471	594659	244689	410745	786143	571630	903650	483649	2484788	919923
1440	unknown1753	1	1	24	0	222.739	0.999505	1	26.3284	17.9999	6209.99	1	1	25.1642	21.1841	5469.47	513.235	0.0938364	7316	5880	3301	4982	4372	5046	4724	5694	5929	4745	3959	6289	5206	5312	4678	9644	5442.31
1441	unknown1754	1	1	24	18	403.051	0.999871	1	25.1282	17.9999	7191.25	1	1	24.5641	18.0095	6493.52	691.368	0.10647	9149	7082	4443	5351	4507	6349	5939	6863	6982	5395	5045	7834	5965	7162	5340	10298	6481.5
1442	unknown1755	1	1	24	0	263.574	0.973589	1	24.0327	17.9999	3391.25	0.999648	1	24.0163	21.002	2972.56	403.681	0.135803	3941	3275	2450	2829	1935	2821	2602	2862	3180	2771	2266	3059	3434	2548	2385	5198	2972.25
1443	unknown1756	1	1	24	0	733.977	0.961344	1	24.5682	17.9999	7857.99	0.999243	1	24.2841	21.0379	6901.28	907.981	0.131567	8822	7403	5329	7213	4388	6517	6001	7482	6621	5756	5474	7792	7038	7212	5887	11295	6889.38
1444	unknown1757	0.0579045	0.211227	18	15	14369.8	0.280139	1	20	12	79352.5	0.0830762	0.391624	19	13.6167	68456.8	14136.4	0.206501	83444	73990	60880	49401	58484	57405	52492	53405	83564	63219	81479	89148	76364	68552	63174	78117	68319.9
1451	unknown1763	0.182589	0.440451	24	15	52113.6	0.454618	1	20	12	448987	0.2896	0.862427	22	13.475	386745	81008.7	0.209463	470156	416410	294813	286939	354467	371698	296998	307326	515279	379535	439020	462113	416510	389206	349251	403338	384566
1452	unknown1764	0.139706	0.372952	18	15	85514.7	0.569431	1	20	12	672694	0.280928	0.843564	19	13.6167	584029	104612	0.179121	718138	642364	460099	460658	532700	567313	446414	473841	784535	564888	646747	694606	614762	606999	532714	581474	583016
1457	unknown1769	0.182589	0.440451	18	15	121353	0.465937	1	20	12	788308	0.294718	0.873084	19	13.6167	681083	130413	0.191479	828719	777489	524516	534029	623975	624391	529827	529530	901691	671326	768365	811852	727922	691723	608232	723540	679820
1459	unknown1770	0.182589	0.440451	18	15	83804	0.538221	1	20	12	576249	0.326267	0.929433	19	13.6167	503075	90050.2	0.179	604933	583500	394170	396433	466973	460915	391200	406081	661272	494924	562737	586064	524658	537898	448094	515397	502203
1462	unknown1773	1	1	18	15	1600.89	0.989276	1	20	12	21459.2	0.999942	1	19	13.6167	20576.7	1394.06	0.0677496	23612	22375	17390	19393	18697	22943	17805	17052	20684	21133	21395	22625	23761	21950	18972	19224	20563.2
1463	unknown1774	0.475047	0.810143	18	15	3117.63	0.722134	1	20	12	32009.5	0.71007	1	19	13.6167	30081.3	3338.02	0.110967	35860	31663	26120	29462	25205	32193	24673	24441	33828	30960	30513	32737	34414	31917	27692	29105	30048.9
1468	unknown1779	0.235786	0.510223	24	15	2172.59	0.723682	1	20	12	23001	0.472355	1	22	13.475	20481	3072	0.149993	24722	22003	14151	15816	19836	20395	16753	17180	26038	21524	21842	22600	23101	21316	18644	20453	20398.4
1471	unknown1781	0.0787266	0.260816	18	15	64761.6	0.411217	1	20	12	366147	0.143429	0.555002	19	13.6167	309532	69970.5	0.226053	380794	362553	243611	238084	265371	277735	242394	242003	426999	318688	362944	355957	322443	316913	271331	313848	308854
1472	unknown1782	0.105571	0.313957	18	15	33039.2	0.283482	1	20	12	209132	0.134942	0.532443	19	13.6167	174174	39692.3	0.227889	210879	189147	135888	135840	151314	152691	143165	138054	246117	187587	206352	196471	184361	179978	146858	175926	173789
1474	unknown1784	0.0787266	0.260816	24	15	7042.43	0.298621	1	21.1511	12	59802.8	0.111678	0.475016	22.5755	13.4589	48544.4	13923.1	0.286812	50895	45348	32093	31727	60500	46506	42974	35521	58507	50358	66200	64146	49538	54916	39049	43641	48244.9
1475	unknown1785	0.301037	0.596563	24	18	1902.12	0.737538	1	20.0911	12	20524.5	0.556167	1	22.0456	14.8508	18982.2	2675.49	0.140948	21485	19699	15702	17240	15502	20131	17417	15048	18349	20474	20331	22944	22895	21575	17541	17758	19005.7
1476	unknown1786	0.235786	0.510223	18	15	3954.85	0.31441	1	20	12	41847.2	0.267021	0.823247	19	13.6167	37512.8	5009.28	0.133535	41221	38548	30836	34142	31724	37534	33108	30322	41729	37470	42706	45484	42076	42708	33596	36225	37464.3
1481	unknown1790	0.380147	0.698955	18	15	2385.25	0.864487	1	20	12	27005.2	0.69434	1	19	13.6167	25589.8	2647.36	0.103453	30561	28467	21802	24997	22382	25705	21653	21999	28820	25471	25410	28320	27181	28723	22987	24549	25564.2
1484	unknown1793	0.873774	1	24	15	519.547	0.821866	1	26.8085	12	5452.75	0.955905	1	25.4043	13.6245	5013.83	405.376	0.0808516	5629	4592	3664	3999	5494	5472	4766	3424	5106	4738	5702	6265	5453	6084	4721	5284	5024.56
1485	unknown1794	1	1	24	18	444.77	0.986791	1	20.9501	12	6350.25	0.999912	1	22.4751	14.8649	5943.6	695.567	0.117028	6909	6054	4452	5586	6266	6619	5062	3767	6175	5380	6609	7237	5828	7404	5564	6240	5947
1486	unknown1795	0.301037	0.596563	24	3	1478.21	0.762304	1	22.1053	6.63e-05	4726.75	0.567263	1	23.0526	1.44082	3324.22	1549.83	0.466224	2576	2308	3710	10313	1549	6435	6662	3640	2207	399	1090	2646	1631	3473	1070	3993	3356.38
1487	unknown1796	0.475047	0.810143	24	3	1286.93	0.799624	1	20	6	4447.75	0.747546	1	22	4.675	3125.35	1485.73	0.475382	2109	2012	2962	8193	1293	6722	6544	3232	1919	411	1021	2158	1459	3708	1095	4438	3079.75
1488	unknown1797	0.380147	0.698955	24	3	173.241	0.999129	1	20	5.99998	741.75	0.747504	1	22	4.67499	548.493	293.028	0.534242	196	343	322	1339	159	1213	1202	393	154	24	76	280	149	355	110	2317	539.5
1489	unknown1798	0.301037	0.596563	24	3	166.17	0.999809	1	20	6	710	0.66237	1	22	4.675	585.381	230.317	0.393448	207	395	309	1433	169	1134	1275	262	162	25	52	242	143	455	77	2913	578.312
1511	unknown1817	0.587657	0.934468	24	3	342.416	0.994176	1	20	6.63e-05	3729	0.898233	1	22	1.37504	3480.24	699.783	0.201073	4733	3623	2862	3698	2798	3730	3274	4057	3549	2558	2670	2981	3510	3232	2715	6289	3517.44
1513	unknown1819	1	1	24	0	196.576	0.999984	1	23.3952	17.9999	3517.25	1	1	23.6976	20.9651	3251.88	231.368	0.071149	4553	3712	2468	2567	2530	3255	2621	3464	4251	2801	2275	3516	3088	3100	2898	4983	3255.12
1542	unknown1845	0.182589	0.440451	24	15	1070.56	0.569846	1	23.2718	12	6095.5	0.339497	0.938351	23.6359	13.4801	4999.79	1162.9	0.232591	5234	6281	2120	2267	3119	4446	5423	4650	6793	4929	6706	5954	6173	5966	4330	5489	4992.5
1579	unknown1879	0.182589	0.440451	18	0	1065.26	0.675031	1	28	12	2565.25	0.381285	0.99336	23	4.92857	3420.65	3136.15	0.916828	5216	2018	7269	14145	1904	1990	1714	2161	3341	1851	2469	2600	2046	2384	2248	2409	3485.31
1589	unknown1888	0.235786	0.510223	18	15	5009.14	0.880313	1	28	12	6505.25	0.533923	1	23	14.5119	18858.5	16751.2	0.888257	13887	3349	52685	181150	2271	4281	2087	3529	10360	3486	4090	8085	3080	2807	2546	3232	18807.8
1593	unknown1891	0.235786	0.510223	18	15	1858.28	0.900274	1	28	12	2631.25	0.54127	1	23	14.5119	9381.45	8262.71	0.88075	5318	1329	25340	97455	885	2242	817	1266	3885	1834	1352	3454	1254	882	1003	1387	9356.44
1594	unknown1892	0.873774	1	24	15	403.758	0.948944	1	28	6.00002	4473.75	0.984497	1	26	10.9107	4410.05	41.9887	0.00952114	4438	3622	3397	3763	5066	4603	4289	3937	5510	3534	4088	4692	4533	5834	3874	5435	4413.44
1597	unknown1895	0.301037	0.596563	18	6	980.58	0.992182	1	20	6	10281.5	0.659604	1	19	6.01667	9671.85	632.088	0.0653534	8990	7766	10078	9673	12219	9829	9693	9385	9558	6773	7951	7974	10411	12764	7911	12549	9595.25
1598	unknown1896	0.139706	0.372952	18	6	932.674	0.992705	1	20	6	7532.75	0.412668	1	19	6.01667	6921.82	653.036	0.0943445	7736	5564	5823	5982	10176	7051	6623	6281	6929	4129	4778	4642	7581	9915	5635	10638	6842.69
1599	unknown1897	0.475047	0.810143	24	3	1488.81	0.701041	1	28	6.63e-05	8737.73	0.699201	1	26	1.62503	6267.59	381.229	0.0608253	12238	4707	9537	8469	4791	9151	4337	5751	4812	8514	4648	3348	4979	5210	4138	5536	6260.38
1607	unknown1903	0.587657	0.934468	18	6	511.238	0.999994	1	20	6	3842.25	0.900061	1	19	6.01667	3471.64	416.304	0.119916	4816	2833	2194	2624	4852	4068	3000	3449	3539	2684	3198	2775	3398	3772	2968	4569	3421.19
1608	unknown1904	1	1	18	15	320.673	0.999996	1	20	12	3421.25	1	1	19	13.6167	3250.76	381.995	0.11751	5240	2707	2152	3725	2806	3555	2580	2566	3946	3264	3483	2992	3633	3605	2283	3416	3247.06
1646	unknown1939	0.0579045	0.211227	18	0	475.353	0.62494	1	28	12	1966.5	0.156293	0.589213	23	4.92857	2050.25	906.396	0.442091	2431	2032	3567	3860	1205	1701	1485	1848	1933	2002	1738	2193	1669	1978	1686	1775	2068.94
1663	unknown1954	0.0579045	0.211227	24	12	1025.66	0.159444	1	20.0911	12	4035	0.052487	0.292119	22.0456	12.0951	2616.36	1469.18	0.561536	1906	1695	1134	1730	2573	1889	3371	1470	3425	3352	3492	5871	2055	3464	1636	1438	2531.31
1713	unknown2	0.182589	0.440451	24	0	302.995	0.63989	1	20	6.57e-05	2856.5	0.367683	0.976072	22	3.61e-05	2606.05	372.449	0.142917	2997	2176	3018	3235	3117	2611	2448	2337	2696	1950	1982	2225	2613	2480	2821	3458	2635.25
1715	unknown200	1	1	18	3	617.304	0.999995	1	20	6.00001	5538	1	1	19	4.43334	4880.99	830.001	0.170048	4995	5596	4730	3473	9183	4424	3394	5151	6743	3686	3301	3557	4674	3279	5113	6620	4869.94
1726	unknown201	0.587657	0.934468	24	0	290.974	0.983856	1	20	6.63e-05	4904.25	0.894942	1	22	3.65e-05	4675.47	306.466	0.0655476	5486	5107	5085	3939	5384	4785	4384	4631	4377	4082	3634	5037	5012	4865	5584	3800	4699.5
1737	unknown202	0.587657	0.934468	18	6	2625.49	0.997972	1	20	6	86763.8	0.899428	1	19	6.01667	85865	433.649	0.00505036	90940	91091	84196	79588	96707	87312	70576	92460	87866	79332	78261	79697	89245	84414	88342	92972	85812.4
1742	unknown2024	0.587657	0.934468	18	0	673.519	0.975265	1	28	17.9999	4350.5	0.892154	1	23	18.8928	5214	2302.22	0.441547	4588	3129	6908	21835	3085	4616	3465	2939	4363	3852	4169	4626	4804	5766	3435	3397	5311.06
1748	unknown203	1	1	18	6	713.824	1	1	20	6	50139.2	1	1	19	6.01667	49526.2	627.641	0.0126729	51315	50575	46221	48161	55610	53695	43205	48047	50512	47490	47422	47763	51548	48638	50032	50968	49450.1
1755	unknown2036	1	1	18	9	542.528	0.999934	1	23.52	12	7725.25	1	1	20.76	10.4859	7260.92	313.573	0.0431864	5922	6625	5814	8582	6047	7787	7547	7005	6099	7322	7765	9715	5211	7112	7205	9742	7218.75
1758	unknown2039	1	1	18	15	749.003	1	1	20	12	4570.75	1	1	19	13.6167	3636.17	2012.21	0.553387	10964	2009	3052	4740	2837	2044	1606	2758	11621	1894	2646	2122	2156	2070	2181	3167	3616.69
1759	unknown204	1	1	24	0	107.657	1	1	26.1721	5.31e-05	5964.25	1	1	25.0861	2.54e-05	5898.18	47.4737	0.00804887	6138	6308	6253	5158	6376	6194	5626	5451	5851	5540	5413	6567	6428	6000	6358	4686	5896.69
1760	unknown2040	1	1	18	15	7930.91	1	1	20	12	57705.5	1	1	19	13.6167	44894.6	26396.1	0.587957	142318	23006	33181	58223	33301	26397	20358	30328	149235	23622	32628	25337	27539	26166	26980	35604	44638.9
1799	unknown2076	0.235786	0.510223	18	9	2216.96	0.972989	1	20	6	10665	0.567169	1	19	7.6	8114.67	2086.26	0.257097	9584	4335	2986	3098	9254	14647	8634	10125	7453	5794	5459	8485	11582	10234	5505	6098	7704.56
1800	unknown2077	0.235786	0.510223	18	9	2093.74	0.998183	1	20	6	11150.2	0.575838	1	19	7.6	6538.32	3658.26	0.559511	1910	609	565	3027	3059	8253	30158	3131	2591	2312	5999	5481	6358	14058	3870	1726	5819.19
1802	unknown2079	0.719948	1	18	0	887.773	0.635319	1	28	12	4163.75	0.815174	1	23	4.92857	6419.99	5656.62	0.881094	4965	4871	19328	26582	2530	5273	4661	3743	3776	3996	4263	4620	3522	5353	4244	2859	6536.62
1804	unknown2080	0.301037	0.596563	18	6	2238.88	0.999992	1	20	6.00001	6326.75	0.662436	1	19	6.01667	4654.7	2137.4	0.459192	5600	1920	651	610	8762	7913	3810	4822	3736	1913	2288	4299	10044	5833	4086	4044	4395.69
1805	unknown2081	0.182589	0.440451	18	6	14137	0.974721	1	20	6	52383.5	0.485176	1	19	6.01667	33844.3	22361.7	0.660721	30677	9977	5053	2797	78268	71931	29601	29734	28223	13560	14871	29620	56279	40411	26432	30719	31134.6
1808	unknown2084	0.235786	0.510223	18	6	6114.88	0.846529	1	20	6.00001	20904.2	0.521243	1	19	6.01667	15010.6	6812.55	0.453849	17831	8489	6323	4267	26296	26240	14903	16178	14650	8850	9381	13634	17817	17387	10210	14505	14185.1
1812	unknown2088	0.182589	0.440451	18	6	3178.8	0.991641	1	20	6.00001	12217.2	0.490483	1	19	6.01667	7693.11	5411.74	0.703453	6069	2118	1283	639	24135	12967	5307	6460	7441	2836	2881	5025	12482	8374	5206	9374	7037.31
1813	unknown2089	0.182589	0.440451	18	6	2361.03	0.995405	1	20	6	8136	0.491656	1	19	6.01667	5371.12	3409.67	0.634815	4300	1651	1002	527	14820	8997	4069	4658	5510	2255	2437	3950	8867	6057	3960	6267	4957.94
1815	unknown2090	0.380147	0.698955	18	6	20335.3	0.992433	1	20	6	76677.8	0.745032	1	19	6.01667	48693.7	34146.8	0.701257	36249	12106	6070	3759	143132	88870	36625	38084	43947	17768	19334	39894	83015	56303	35084	52653	44555.8
1819	unknown2094	0.301037	0.596563	18	3	176.246	0.965835	1	26.1721	5.87e-05	4418.5	0.649914	1	22.0861	1.84053	4389.37	620.839	0.141442	4991	5127	4322	3234	4297	4036	4044	4405	5353	2995	3671	4106	4452	4728	4839	6028	4414.25
1820	unknown2095	1	1	24	18	645.942	0.910916	1	28	17.9999	6548.25	0.995909	1	26	18.1071	5557.73	778.788	0.140127	6227	6571	1586	1917	7125	6683	4498	4731	6243	4711	6384	6717	7469	5615	5466	7643	5599.12
1827	unknown2100	0.105571	0.313957	18	6	7900.33	0.95424	1	20	5.99999	22487.8	0.331959	0.937016	19	6.01666	15851	7722.51	0.487194	18710	6926	6430	3685	30640	25630	15560	18121	15705	7604	6617	12685	20323	13978	14442	21587	14915.2
1828	unknown2101	0.105571	0.313957	18	6	23626.9	0.980562	1	20	5.99998	60615.8	0.338299	0.938351	19	6.01666	43201.7	20680.7	0.478702	49295	18812	16127	9884	79246	70371	38756	54090	43956	20456	18403	33705	57678	36147	43538	60666	40695.6
1832	unknown2105	0.719948	1	18	9	1089.47	0.999998	1	28	6	4375	0.956505	1	23	8.21429	3215.86	514.768	0.160072	2222	942	480	1980	1944	4375	8757	2424	1220	1456	3553	3983	4197	9049	3324	1173	3192.44
1834	unknown2107	0.380147	0.698955	18	9	10663.2	0.998101	1	28	6	31623	0.747126	1	23	8.21429	25843.3	1736.33	0.067187	15108	5483	2337	9990	22320	29181	57797	17194	11177	11495	34534	26218	40928	93953	23731	10782	25764.2
1838	unknown2110	0.301037	0.596563	18	15	256.68	0.999978	1	28	12	2608.75	0.662431	1	23	14.5119	2449.74	492.527	0.201053	2947	2911	2549	2512	2572	2307	2004	2161	3083	2450	2244	2658	2208	2205	1877	2484	2448.25
1839	unknown2111	0.0579045	0.211227	18	0	793.02	0.985798	1	28	12	4497	0.220523	0.732821	23	4.92857	4271.47	1095.69	0.256513	4798	5422	5380	6119	3372	3520	3668	4086	4309	4848	4377	4454	3603	1439	4166	5144	4294.06
1846	unknown2118	0.182589	0.440451	18	6	1493.94	0.999999	1	28	5.99999	6986.75	0.493084	1	23	6.29761	5516.85	962.426	0.174452	5780	4126	2323	1652	11175	6891	4877	5004	4717	2974	3070	4927	10598	5153	6561	7911	5483.69
1847	unknown2119	0.182589	0.440451	18	6	33206.4	0.999999	1	28	6.00001	112170	0.493084	1	23	6.29762	79675.8	24488.9	0.307357	84335	34871	15391	9648	200114	119720	57797	71049	72975	28058	33909	70675	103190	152817	101246	105518	78832.1
1849	unknown2120	0.235786	0.510223	18	6	8819.21	0.999999	1	20	6.00002	34499.8	0.576457	1	19	6.01667	24749.8	12643.7	0.510861	22731	9196	3962	2351	67126	35451	14366	21056	18115	8094	10142	20005	53279	24946	24478	36184	23217.6
1851	unknown2122	0.182589	0.440451	18	6	4614.93	1	1	20	5.99998	16908.8	0.493084	1	19	6.01666	12474	5775.95	0.46304	11500	6042	2532	1505	31209	16713	8763	10950	9660	4159	5118	9492	25864	12713	13047	19118	11774.1
1853	unknown2124	1	1	18	6	1615.74	0.999907	1	28	6	7609.5	1	1	23	6.29762	6552.41	418.211	0.0638256	3776	1609	973	5271	4600	6505	14736	4597	2750	2346	6007	5539	8613	29128	5485	2673	6538
1854	unknown2125	0.235786	0.510223	18	6	7155.92	0.999971	1	28	5.99998	29525	0.576448	1	23	6.29761	21832.7	4724.95	0.216416	20230	10029	3854	2162	61541	27696	11383	17480	17171	7125	7387	17133	50964	34769	23239	34556	21669.9
1855	unknown2126	0.139706	0.372952	18	6	1266.07	0.999968	1	28	6.00001	3608.5	0.414669	1	23	6.29762	2611.49	641.894	0.245796	1381	625	274	1084	3197	4248	4950	2039	928	828	1750	2037	4231	9846	2956	1056	2589.38
1856	unknown2127	0.139706	0.372952	18	6	13114.4	0.999973	1	28	6.00002	39539.5	0.414671	1	23	6.29763	27602.6	7959.12	0.288346	19193	8014	4441	5271	67428	42793	27268	20669	16930	8486	11700	20405	58547	73324	30274	22512	27328.4
1860	unknown2130	0.301037	0.596563	18	6	41472.5	0.999851	1	28	5.99998	171190	0.662385	1	23	6.29761	127270	26646.2	0.209367	112390	54766	20716	14925	342547	164305	80210	97698	100856	39985	47662	93291	295762	217770	136155	202600	126352
1863	unknown2133	0.380147	0.698955	18	6	1137.38	0.999972	1	28	6	6052.5	0.747814	1	23	6.29762	5106.71	407.08	0.0797148	5490	4358	2397	2001	9384	5930	3914	4982	4738	2862	2590	4133	9450	4419	6186	8649	5092.69
1864	unknown2134	0.475047	0.810143	18	6	4730.19	0.986937	1	28	6	29825.5	0.823984	1	23	6.29762	26392.1	778.041	0.0294801	25930	20180	12389	11121	49540	26563	19987	23212	23592	15006	13265	21602	49413	38964	31624	39456	26365.2
1865	unknown2135	0.873774	1	18	9	875.398	0.999686	1	28	6.00002	2495.75	0.991638	1	23	8.21429	1982.52	390.53	0.196986	869	410	177	896	1079	2088	5737	1079	534	758	3986	2327	2645	6882	1380	589	1964.75
1869	unknown2139	0.719948	1	18	6	10592.3	0.994357	1	28	6	30817	0.955159	1	23	6.29762	23333.5	6891.19	0.295334	18265	7554	1463	1885	48512	34635	23807	16314	14373	8812	19653	26864	55137	50342	21694	20228	23096.1
1871	unknown2140	0.873774	1	18	3	44.5477	0.95711	1	28	6.00001	5836	0.985803	1	23	4.38096	5881.29	722.181	0.122793	8141	6386	1589	1745	6873	6771	4762	4938	6789	3793	4896	6177	8732	7805	6722	7818	5871.06
1873	unknown2142	0.719948	1	18	3	104.652	0.973841	1	28	5.99999	6207.5	0.950069	1	23	4.38095	6176.32	944.751	0.152964	8739	6464	1526	1507	7885	7090	4935	4920	7502	3576	4756	6347	9847	8072	7007	8434	6162.94
1874	unknown2143	1	1	18	6	971.034	1	1	28	6	5691.75	1	1	23	6.29762	5090.31	526.152	0.103363	7482	5571	1196	1152	6547	7063	4306	4851	6015	2690	3920	5677	7918	2533	6592	7642	5072.19
1875	unknown2144	1	1	18	6	2594.73	0.999999	1	28	6	10550.2	1	1	23	6.29762	9014.01	1195.8	0.13266	13089	8501	1664	1639	13132	12925	7867	8277	10080	4494	6152	9359	16497	5208	11716	12965	8972.81
1876	unknown2145	0.139706	0.372952	18	6	2384.19	0.999992	1	20	6	9657.75	0.414676	1	19	6.01667	6800.47	3563.63	0.524027	5820	2602	1536	1159	20239	8414	4527	5451	5147	1881	2036	3987	13638	7816	6826	10819	6368.62
1877	unknown2146	0.182589	0.440451	18	6	21970.2	1	1	20	5.99999	92148.5	0.493084	1	19	6.01666	64643.6	35531.4	0.549651	48211	19744	9458	7323	201617	84169	39915	42893	42453	15343	17376	35884	147525	103272	63298	86925	60337.9
1878	unknown2147	0.182589	0.440451	18	6	4347.65	0.999997	1	20	6	18976.2	0.493083	1	19	6.01667	13017.4	7445.37	0.571958	10489	4354	2009	1479	42932	17123	6513	9337	8580	2980	3526	7436	28704	16023	12115	20242	12115.1
1880	unknown2149	0.235786	0.510223	24	18	202.586	0.497652	1	20	12	2973	0.368761	0.976388	22	14.85	2818.68	471.148	0.167152	3053	2921	2893	2753	2382	2620	2671	2160	3388	2973	2786	2745	3256	2852	2390	3326	2823.06
1884	unknown2152	0.475047	0.810143	18	6	2709.46	0.999953	1	20	5.99998	11726.5	0.828628	1	19	6.01666	7304.97	5401.33	0.739406	4889	1312	333	295	26241	13016	3485	4164	5910	1217	1671	4229	19183	7410	3360	9692	6650.44
1885	unknown2153	0.475047	0.810143	18	6	23478.2	0.999516	1	20	5.99999	136978	0.828473	1	19	6.01666	77793	69861.2	0.898041	37245	7733	1536	1033	337572	138202	33689	38450	45215	9382	13547	38218	212882	86411	29817	78303	69327.2
1886	unknown2154	0.719948	1	18	6	3579.55	0.999995	1	28	6	15458	0.956505	1	23	6.29762	11019.3	3387.46	0.307411	9789	4871	942	534	32695	15268	6026	7843	9138	3104	5583	9833	27512	13349	9406	18549	10902.6
1887	unknown2155	0.719948	1	18	6	2172.59	0.999921	1	28	6	11222.2	0.956487	1	23	6.29762	8608.53	2185.11	0.253831	8431	4197	1740	1853	21338	11132	5934	6485	7983	4011	5435	8307	17855	10141	7666	14024	8533.25
1888	unknown2156	0.719948	1	18	6	19659.3	0.999994	1	28	6	88892	0.956504	1	23	6.29762	61936.3	21124.4	0.341066	47088	25643	3920	2701	198171	83495	35159	38743	44868	18424	31828	57772	157229	91015	52053	91228	61208.6
1889	unknown2157	0.475047	0.810143	18	6	4857.65	0.999391	1	20	5.99999	29873.5	0.828429	1	19	6.01666	16918.8	15240	0.900773	8022	2041	399	363	73629	30755	7066	8044	9903	2281	3452	8038	45826	19174	6217	15943	15072.1
1890	unknown2158	0.475047	0.810143	18	6	4548.64	0.998311	1	20	5.99999	27287.5	0.828046	1	19	6.01666	15166.3	14066.4	0.927479	8207	1626	358	227	67612	28076	5831	7631	9617	1818	2870	6688	38216	15394	5632	15585	13461.8
1891	unknown2159	0.587657	0.934468	18	9	1850.32	0.553881	1	28	6	11486.2	0.69083	1	23	8.21428	10648.7	1084.31	0.101826	7934	7059	7688	10689	12277	11910	11122	10636	14261	10670	10099	9697	10831	12509	10885	11322	10599.3
1892	unknown216	1	1	24	0	135.057	0.99999	1	24.1644	18	3990	1	1	24.0822	21.0105	3803.91	139.507	0.0366746	3954	3899	3340	4060	3773	4446	3045	3224	3864	4240	3637	3412	4808	4468	2941	3743	3803.38
1897	unknown2164	0.235786	0.510223	18	9	2117.08	0.578212	1	28	5.99999	11373	0.408001	1	23	8.21428	10540.1	1060.13	0.100581	8777	5974	7505	8772	13784	12291	10461	8956	13506	9946	10559	10061	13148	12256	9493	12381	10491.9
1899	unknown2166	0.139706	0.372952	18	6	2647.41	0.990643	1	20	6.00002	8490.5	0.412099	1	19	6.01667	5155.47	3986.05	0.773169	3942	983	185	189	15242	9876	5332	3512	3587	1194	2606	3101	10554	7550	2610	4296	4672.44
1900	unknown2167	0.301037	0.596563	18	6	10389.7	0.96714	1	20	5.99998	31946.8	0.650399	1	19	6.01666	19828	14137.2	0.712995	21067	5894	1231	646	52212	39811	15937	19827	20427	6923	6628	10632	35774	21499	10519	20810	18114.8
1901	unknown2168	0.235786	0.510223	18	6	18386	0.955093	1	20	5.99999	63151.5	0.560918	1	19	6.01666	37147.8	29894.2	0.804738	35028	8999	1555	781	109662	81301	27562	34081	34963	10739	10325	17495	72734	39079	16571	35528	33525.2
1902	unknown2169	0.301037	0.596563	18	6	101792	0.961631	1	20	5.99999	372183	0.648348	1	19	6.01666	217592	178193	0.818928	195330	48491	8085	4553	658508	480334	165414	184477	193187	62897	61648	109209	440746	250952	93541	178613	195999
1905	unknown2171	0.235786	0.510223	18	9	8417.58	0.742511	1	28	6.00001	33503.5	0.480149	1	23	8.21429	28322.3	4618.99	0.163087	21033	13446	15922	20339	39872	39531	29344	25267	37184	24393	27087	26092	35224	40035	27238	27787	28112.1
1906	unknown2172	0.235786	0.510223	18	9	1336.79	0.814332	1	28	6	6504.75	0.508864	1	23	8.21428	5797.15	563.654	0.0972295	4351	3794	4041	4477	7862	6489	5754	5914	7793	5089	5167	4902	7169	7496	5916	6130	5771.5
1908	unknown2174	0.380147	0.698955	18	6	15913.3	0.99689	1	20	5.99999	83820.2	0.746679	1	19	6.01666	47727.1	42230.9	0.884841	27541	7351	1215	1017	194921	89324	25661	25375	24983	8420	14736	28860	106205	59298	21682	45164	42609.6
1909	unknown2175	0.235786	0.510223	18	6	1771.66	0.999246	1	20	5.99999	9692.25	0.5762	1	19	6.01666	5708.88	4727.49	0.828095	3235	1112	197	235	22776	9731	2885	3377	3185	1016	1852	3279	13373	6147	2589	7187	5136
1910	unknown2176	0.587657	0.934468	18	9	4000.81	0.629426	1	28	5.99999	20493.2	0.737761	1	23	8.21428	18968.6	1625.24	0.0856806	14740	9934	12903	14561	27337	20243	18537	15856	24559	17227	17812	17719	24655	24541	17991	23699	18894.6
1911	unknown2177	1	1	18	0	218.142	0.714375	1	28	17.9999	1838	0.954653	1	23	18.8928	2541.65	1256.46	0.494349	1828	1881	6695	9335	1084	2113	2148	1825	1838	1717	1717	1981	1875	2311	1598	1568	2594.62
1914	unknown218	0.301037	0.596563	18	6	922.951	0.999973	1	20	6.00001	5814.75	0.662429	1	19	6.01667	5161.02	755.77	0.146438	6884	4043	3730	2891	7722	7230	4159	4148	5016	2532	3541	4751	6308	7627	4836	5693	5069.44
1919	unknown2184	0.587657	0.934468	18	6	2915.75	0.997257	1	20	5.99999	19287.5	0.899203	1	19	6.01666	10708.4	9927.92	0.927117	5367	1825	325	285	48220	19424	4658	4848	5959	1749	2630	5290	23858	10532	4709	12406	9505.31
1921	unknown2186	1	1	24	18	1659.05	0.997599	1	28	17.9999	22369	0.999997	1	26	18.1071	18776.9	2307.88	0.12291	25734	27846	642	898	10727	25298	21741	19075	24133	17083	17219	22522	26173	21561	18445	23297	18899.6
1922	unknown2187	0.182589	0.440451	18	9	3742.89	0.76626	1	28	6.00003	15292	0.41508	1	23	8.2143	13131.5	1926.34	0.146695	9646	6474	8588	8978	19755	16575	12597	12241	18323	11771	11614	11375	17263	15952	12792	14758	13043.9
1923	unknown2188	0.719948	1	18	9	36269.3	0.964245	1	28	5.99998	176130	0.947582	1	23	8.21428	155588	13471	0.0865812	141351	63735	108761	137430	201215	197960	167346	137998	193577	140278	143218	122055	186966	213056	153774	170877	154975
1925	unknown219	0.182589	0.440451	18	0	1597	0.834218	1	20	17.9999	15914.7	0.438949	1	19	18.05	14933.5	1369.11	0.0916806	16012	15190	17307	17552	16736	14929	11305	10647	18161	13395	13826	14976	15055	15410	15376	17818	15230.9
1927	unknown2191	0.235786	0.510223	18	9	7047.56	0.998422	1	28	6	29890.2	0.575919	1	23	8.21429	22054	3711.04	0.168271	15932	6158	10460	14046	41560	31291	22897	23813	24749	16409	16706	14183	29931	34081	23708	24237	21885.1
1928	unknown2192	1	1	18	12	749.18	0.999991	1	28	17.9999	14308.5	1	1	23	15.0595	12787.3	454.22	0.035521	18818	20748	847	1482	5696	15212	15644	14167	16295	12000	11182	15244	14769	14533	13114	14818	12785.6
1930	unknown2194	1	1	18	15	286.732	0.997143	1	22.2166	17.9999	3982.75	0.999996	1	20.1083	16.5244	3712.21	330.255	0.0889646	4865	3949	3407	3487	4210	2809	2878	3839	4339	3354	3350	3636	3488	4242	3304	4897	3753.38
1932	unknown2196	0.235786	0.510223	18	6	4625.01	0.996794	1	28	6.00001	21586	0.575364	1	23	6.29762	16439.7	5060.41	0.307816	12878	5529	9092	10292	31548	22121	15487	17188	20568	12295	12283	12107	20953	22087	17209	18609	16265.4
1934	unknown2198	1	1	18	12	1276.86	0.999926	1	28	17.9999	11546.2	1	1	23	15.0595	10154.7	201.301	0.0198234	15763	16038	685	731	6803	12269	9967	9669	13901	7993	9928	12556	13305	9536	9465	13879	10155.5
1935	unknown2199	0.475047	0.810143	18	3	244.482	0.839838	1	23.7736	6.63e-05	3845.25	0.765564	1	20.8868	1.7406	3498.46	527.933	0.150904	3771	3833	3329	4448	2625	3225	3965	3332	3870	3491	2410	2746	3958	4892	3961	2818	3542.12
1937	unknown220	1	1	18	6	309.359	1	1	28	5.99999	4441.25	1	1	23	6.29761	4258.25	92.3815	0.0216947	5156	4495	2965	3041	4598	5106	4182	3879	3994	3267	3948	4695	4790	4843	4856	4266	4255.06
1938	unknown2200	0.105571	0.313957	18	6	9666.15	0.909576	1	20	6	25759.8	0.321025	0.921164	19	6.01667	17719.7	8970.04	0.506218	26773	8062	4285	3704	28321	33681	21474	19563	17854	10813	7830	9480	25691	20422	11956	16215	16632.8
1939	unknown2201	0.235786	0.510223	18	6	4017.43	0.922062	1	20	6	10696	0.549171	1	19	6.01667	7310.44	3770.78	0.515807	11229	3280	1797	1251	12805	13929	8577	7473	7601	4593	3020	3786	10334	8773	4453	6755	6853.5
1940	unknown2202	0.182589	0.440451	18	6	32122.3	0.997622	1	20	6	122313	0.492345	1	19	6.01667	90284.2	41080.7	0.455015	62270	25367	42180	45873	189986	118883	90917	89465	95004	68083	54824	51798	114954	117224	101940	96128	85306
1941	unknown2203	0.105571	0.313957	18	6	22595.8	0.928856	1	20	5.99998	106050	0.325772	0.928634	19	6.01666	60992.8	51440.6	0.843387	48288	18703	4492	2444	213210	118561	49394	43037	45860	22868	23689	34408	97848	63103	39574	50669	54759.2
1942	unknown2204	0.0579045	0.211227	18	6	4438.86	0.998174	1	28	6	13286	0.222571	0.733072	23	6.29762	9175.82	3878.68	0.422707	7828	4375	1670	870	20333	11456	11044	10311	9045	4057	6349	9268	15139	12382	10353	10195	9042.19
1943	unknown2205	0.235786	0.510223	18	6	11199.2	0.931623	1	20	5.99998	56202.8	0.552599	1	19	6.01666	32447.3	27081.8	0.834641	26251	10695	2359	1458	112126	65506	24537	22642	24811	12372	12594	18755	52237	35153	19841	25311	29165.5
1944	unknown2206	0.139706	0.372952	18	6	6397.55	0.937886	1	20	6.00002	27095.8	0.397323	1	19	6.01667	16268.3	12694	0.780292	11420	5900	1635	1050	51717	30603	13647	12416	14198	7307	7577	10695	26119	17959	10749	12688	14730
1945	unknown2207	1	1	18	15	257.387	1	1	20	12	3384.75	1	1	19	13.6167	3297.34	338.048	0.102521	4812	4719	2197	2760	1890	3389	3563	3056	3835	3259	2757	3688	3126	3197	2994	3463	3294.06
1946	unknown2208	1	1	18	15	266.226	1	1	20	12	3276.5	1	1	19	13.6167	3130.85	404.22	0.129109	4596	4541	2004	2715	1604	3194	3501	2835	3760	2970	2669	3707	3066	3080	2753	3036	3126.94
1947	unknown2209	0.235786	0.510223	18	6	1720.39	0.982928	1	20	6.00002	7107.25	0.570607	1	19	6.01667	4984.77	2506.25	0.502781	4894	2511	1674	1603	10246	9361	4749	4073	4908	2434	2649	3915	8397	5381	3174	4928	4681.06
1948	unknown221	1	1	18	3	90.1561	1	1	20	6.63e-05	3632	1	1	19	1.58336	3581.7	60.0145	0.0167559	3812	3656	3407	3653	3681	3923	3500	3287	3750	3522	3432	3376	4417	3726	2950	3378	3591.88
1952	unknown2213	0.139706	0.372952	18	6	1225.06	0.989594	1	20	6	5472	0.411809	1	19	6.01667	5035.03	538.192	0.10689	6461	3591	2858	4206	6682	6237	4421	4548	4442	2625	2740	4047	7064	7269	5780	6546	4969.81
1955	unknown2216	1	1	18	12	778.525	0.999997	1	26.4865	12	8516.75	1	1	22.2432	12.4532	7659.95	730.873	0.0954149	12120	12218	644	870	2838	8841	9741	8207	9391	7935	7244	9497	7614	7958	8295	8609	7626.38
1956	unknown2217	0.301037	0.596563	18	6	1842.37	0.987184	1	20	6	6304.5	0.657782	1	19	6.01667	4847.04	1773.5	0.365894	5709	2443	2485	1687	7658	7513	5621	4426	5480	3310	2968	3664	6413	5146	4481	5110	4632.12
1962	unknown2222	0.139706	0.372952	18	6	6299.08	0.997531	1	20	5.99999	16809	0.413999	1	19	6.01666	12330.8	5397.2	0.437701	16306	4281	3824	3021	19965	20807	13508	12956	11837	6279	5610	7688	18587	15475	12614	14070	11676.8
1966	unknown2226	0.380147	0.698955	18	9	307.945	0.737586	1	20	5.99999	5086.75	0.636928	1	19	7.6	4338.67	592.556	0.136575	5650	3633	3400	2997	4685	5753	5517	4392	5371	3586	3451	3703	4393	3935	3358	3731	4222.19
1967	unknown2227	0.0787266	0.260816	18	15	3756.86	0.500553	1	20	12	23488	0.166841	0.616928	19	13.6167	19758.6	4448.04	0.22512	23450	21012	14895	19190	16148	21117	16635	13454	23445	23052	23270	24185	20554	22491	16141	16409	19715.5
1969	unknown2229	0.301037	0.596563	24	15	817.946	0.685368	1	20	12	8235.25	0.531962	1	22	13.475	7125.23	1430.8	0.200807	8552	7922	4637	5537	5997	7282	6394	6058	9093	8500	7984	7364	7381	8158	6307	6222	7086.75
1972	unknown2231	0.475047	0.810143	18	15	347.543	0.988543	1	20	12	4385.5	0.824562	1	19	13.6167	3879.45	601.651	0.155087	4402	4485	2918	3611	2800	4319	4140	2653	4777	3934	4166	4665	4338	4852	3108	2810	3873.62
1973	unknown2232	0.139706	0.372952	18	15	2077.48	0.347026	1	20	12	14657	0.195215	0.676502	19	13.6167	12036.3	2873.17	0.238709	13006	13243	8347	10727	7690	12666	11127	8309	12983	14046	15255	16344	14108	13917	9807	10561	12008.5
1978	unknown2237	0.0579045	0.211227	18	15	922.067	0.582493	1	20	12	6505.25	0.14805	0.567809	19	13.6167	5675.55	876.535	0.154441	6616	6563	4731	3544	4506	5237	5078	5183	6628	5788	6792	6813	6159	5267	5231	6537	5667.06
1979	unknown2238	1	1	18	15	896.965	0.994161	1	20	12	8808.75	0.999983	1	19	13.6167	8233.74	895.541	0.108765	8991	9979	7092	7218	5797	8819	7860	6863	8834	7039	8975	10387	9158	10658	7014	6917	8225.06
1982	unknown2240	0.182589	0.440451	18	15	2683.82	0.33117	1	20	12	26565.2	0.230119	0.748623	19	13.6167	23851.4	3208.22	0.134508	25680	24062	19828	22697	18743	24568	21716	18937	25818	25176	26868	28399	26044	28649	21688	22253	23820.4
1983	unknown2241	0.380147	0.698955	24	21	2395.85	0.870463	1	20	17.9999	10599	0.69686	1	22	19.525	9070.23	1900.11	0.209488	14686	11580	7294	8801	5255	7803	6053	6852	6620	6985	9785	13821	13924	13648	9992	4832	9245.69
1984	unknown2242	0.182589	0.440451	24	18	2322.85	0.198792	1	20	12	16287	0.156659	0.589213	22	14.85	13823	3677.91	0.266071	15673	14101	11589	11168	11645	13248	10485	10353	16145	12697	18283	18023	15865	14762	12702	14977	13857.2
1985	unknown2243	0.105571	0.313957	18	15	866.913	0.549223	1	20	12	7509	0.223092	0.733072	19	13.6167	6530.99	1141.69	0.174811	7499	7117	5242	5665	5890	6182	5127	5579	9438	6352	7266	6980	6800	6562	5957	6663	6519.94
1986	unknown2244	0.235786	0.510223	18	15	2955.71	0.647291	1	20	12	22046.2	0.43952	1	19	13.6167	19606.7	3238.03	0.16515	24418	22143	15679	15785	17366	18608	14665	16471	25567	19179	20888	22551	21798	20622	17298	20167	19575.3
1987	unknown2245	0.235786	0.510223	18	15	1045.1	0.511854	1	20	12	7589.75	0.375889	0.987108	19	13.6167	6658.14	1078.97	0.162052	7989	7349	5863	4719	5392	5950	5895	6138	7839	6934	7719	7867	6522	6545	5898	7744	6647.69
1989	unknown2247	0.139706	0.372952	24	15	649.478	0.724487	1	20	12	5820.75	0.33305	0.93765	22	13.475	5092.83	944.119	0.185382	6172	5960	3484	3916	4618	4724	3886	4258	6463	5053	5363	6404	6402	4790	4588	4998	5067.44
1990	unknown2248	0.235786	0.510223	18	15	1982.55	0.671229	1	20	12	14156	0.450027	1	19	13.6167	12216.9	2312.13	0.189257	15394	13779	9408	9564	9248	12654	9947	10404	16379	12364	13549	14332	12517	12713	10837	12023	12194.5
1994	unknown2251	0.301037	0.596563	24	15	1055.36	0.668043	1	20.464	12	12696	0.523664	1	22.232	13.4659	10996.6	2092.57	0.190293	12932	10889	7162	8365	10655	12841	9732	8901	13275	11993	11684	13832	12197	11322	9808	9519	10944.2
1995	unknown2252	0.235786	0.510223	24	18	787.01	0.354917	1	20.5594	12	6311.25	0.291281	0.866242	22.2797	14.8569	5566.34	1066.21	0.191547	6662	5469	4357	4385	5367	5183	4238	4639	7255	5609	6469	5912	6272	5995	5291	6069	5573.25
1996	unknown2253	0.235786	0.510223	18	15	875.398	0.64581	1	20	12	6015.25	0.438863	1	19	13.6167	5226.92	882.088	0.168759	6409	6127	3926	3750	4174	4737	4800	4669	6604	5679	5454	6324	5291	5135	4674	5741	5218.38
1998	unknown2255	0.139706	0.372952	18	15	1472.2	0.890244	1	20	12	11620	0.383624	0.997653	19	13.6167	9983.31	1981.43	0.198474	11579	12091	7775	9345	8725	11256	7683	8074	11819	10678	10936	13047	9845	9781	8825	7967	9964.12
1999	unknown2256	0.139706	0.372952	24	15	2700.44	0.365507	1	20	12	22551.8	0.202962	0.694138	22	13.475	18655.5	5126.12	0.274777	21154	19795	13401	14621	15953	20316	15973	12716	22378	20722	22304	24803	19948	21168	15720	15311	18517.7
2001	unknown2258	0.235786	0.510223	18	15	645.942	0.725271	1	20	12	5108.25	0.473018	1	19	13.6167	4535.42	798.83	0.176131	5659	5097	3760	3827	3795	4766	3574	3275	5822	4699	4683	5229	5378	4500	3956	4423	4527.69
2002	unknown2259	0.475047	0.810143	24	15	29999.2	0.799018	1	20	12	304766	0.747267	1	22	13.475	263198	54560.2	0.207297	337091	276641	195828	182395	254910	290123	205816	197061	338889	261550	297247	321379	273774	272041	236475	246471	261731
2004	unknown2260	0.475047	0.810143	24	15	4391.31	0.750754	1	20	12	46527.5	0.72435	1	22	13.475	40139.6	8370.88	0.208544	49866	42001	28631	29876	39482	42394	33923	31002	53302	38529	46107	48172	38956	43072	35420	37898	39914.4
2006	unknown2262	0.719948	1	18	12	518.663	0.861841	1	20	12	4235.75	0.916612	1	19	12.0333	3730.84	513.989	0.137767	4184	4082	2376	2802	3606	4395	3558	2750	4428	3989	4295	4231	4029	4065	3027	2905	3670.12
2007	unknown2263	0.719948	1	24	18	556.493	0.577896	1	20	12	4257	0.780909	1	22	14.85	3615.11	767.35	0.212262	4189	3792	2450	3005	2932	3709	3006	3064	4257	3879	4402	4490	4439	4502	2953	2887	3622.25
2008	unknown2264	0.475047	0.810143	18	15	506.819	0.742776	1	20	12	5276.75	0.720422	1	19	13.6167	4599.91	713.207	0.155048	5585	4548	3467	4261	3892	5088	4222	3577	5203	5084	5529	5291	4648	5310	3884	3899	4593
2009	unknown2265	0.301037	0.596563	24	15	1630.59	0.503151	1	20	12	12302.5	0.437344	1	22	13.475	10259.9	2628.85	0.256226	12118	9002	9600	7164	9250	7137	11266	7348	13965	13618	12071	9556	8139	11669	11322	9802	10189.2
2011	unknown2267	0.301037	0.596563	24	15	8088.77	0.90514	1	20	12	88687.2	0.626757	1	22	13.475	75684.4	17261.2	0.228068	107787	78759	51226	46241	75621	77496	61591	59545	101683	78949	86450	87667	72387	79335	66516	72270	75220.2
2012	unknown2268	0.380147	0.698955	18	12	10943.2	0.91653	1	20	12	80395.8	0.715772	1	19	12.0333	69292.5	11629.6	0.167834	92135	74354	43216	42115	76366	74470	56291	53482	93068	70734	79394	78387	67634	67744	55819	61490	67918.7
2015	unknown2270	0.235786	0.510223	24	15	910.754	0.676281	1	21.4599	12	6523.25	0.452219	1	22.7299	13.4582	5526.06	1160.26	0.209962	6962	4702	3287	4125	4593	6333	5218	4026	6121	5662	7063	7247	6386	6707	5082	4538	5503.25
2020	unknown2275	1	1	18	12	1755.39	0.999427	1	20	12	14556.8	1	1	19	12.0333	13351	1161.68	0.0870102	18765	13307	9222	9941	14124	14161	10976	10697	16770	12754	14079	14624	14117	14025	11172	12687	13213.8
2021	unknown2276	0.0787266	0.260816	18	6	2922.47	0.702005	1	20	6	10908.2	0.215296	0.722073	19	6.01667	8721.48	2167.56	0.248531	12917	6460	6026	5691	10203	12560	11250	9620	10336	6316	5328	6288	9032	8020	7677	7617	8458.81
2022	unknown2277	0.235786	0.510223	24	15	862.847	0.664897	1	20	12	5847.25	0.447268	1	22	13.475	4823.46	1283.49	0.266094	6178	5222	2813	3067	3796	5349	4276	3325	5710	5782	5909	5988	5460	5917	4235	3596	4788.94
2023	unknown2278	0.301037	0.596563	24	15	4544.22	0.979121	1	20	12	48483.5	0.654827	1	22	13.475	40979.8	9812.56	0.239448	63084	43328	24641	20913	41919	42955	33357	28937	59783	43245	43855	47051	43815	44388	34780	35404	40715.9
2024	unknown2279	0.235786	0.510223	18	15	767.211	0.813338	1	20	12	6244.5	0.508477	1	19	13.6167	5249.52	1137.43	0.216673	6346	4158	4487	5747	4199	5889	4860	3319	6348	5181	7422	6027	4512	6133	5098	4090	5238.5
2027	unknown2281	0.587657	0.934468	24	15	340.825	0.923211	1	20	12	5630	0.874294	1	22	13.475	4933.69	950.601	0.192675	6441	4938	3801	3860	4946	5140	3795	4040	6929	5071	5096	5424	5085	4852	4011	5101	4908.12
2032	unknown2286	0.139706	0.372952	24	18	6873.79	0.788803	1	20.0911	12	58893.5	0.353243	0.957161	22.0456	14.8508	52389	12983.2	0.247823	61009	59728	48254	35467	53810	40002	34645	41316	61932	51322	61072	61248	62521	42452	43638	81635	52503.2
2038	unknown2291	1	1	18	12	665.741	0.977512	1	23.9024	12	5429.25	0.999745	1	20.9512	12.2429	4856.67	518.8	0.106822	6078	5128	2665	2960	4748	5788	4249	3889	5474	4744	5852	5647	5220	6455	4250	3901	4815.5
2039	unknown2292	0.301037	0.596563	18	15	4169.81	0.963664	1	20	12	26257.2	0.649106	1	19	13.6167	23369.9	4738.08	0.202743	34345	27238	20122	16474	23363	18763	15381	18753	28729	23380	24999	27921	24358	19920	18075	31363	23324
2041	unknown2294	1	1	18	9	4835.55	0.975601	1	28	17.9999	32308	0.9997	1	23	13.1428	29942.5	1900.69	0.063478	39975	28029	14179	12365	38813	36124	28209	22696	35841	29317	30678	33020	32899	38332	29200	28801	29904.9
2044	unknown2297	0.0579045	0.211227	18	0	352.846	0.702176	1	28	17.9999	1353.25	0.170871	0.622517	23	18.8928	1783.43	989.041	0.554574	1626	1369	4496	6592	498	1128	1565	1148	1531	1138	1248	1450	1285	1543	1351	1234	1825.12
2045	unknown2298	0.139706	0.372952	24	18	374.767	0.454127	1	20	12	3480.75	0.238398	0.765774	22	14.85	3188.61	680.168	0.213312	3920	3290	2984	2798	2849	2940	2558	2447	3555	3061	3313	3994	3563	3417	2723	3707	3194.94
2050	unknown2301	0.301037	0.596563	18	15	470.58	0.814269	1	28	12	1433.75	0.589768	1	23	14.5119	1575.46	914.558	0.580504	1108	1817	3679	5098	615	921	1281	1067	1165	1325	1715	1530	593	810	984	1455	1572.69
2053	unknown2304	0.301037	0.596563	24	15	363.099	0.854218	1	24.9858	12	3952.75	0.606386	1	24.4929	13.5357	3530.38	437.651	0.123967	4487	3647	2271	1886	3267	3738	3346	3041	4608	3666	3680	3857	3701	3517	3583	4254	3534.31
2058	unknown2309	0.0787266	0.260816	18	15	195.515	0.686948	1	28	12	878.25	0.21185	0.714974	23	14.5119	1780.69	1198.7	0.673165	868	938	8052	9966	444	747	716	635	751	928	943	891	569	782	684	519	1777.06
2068	unknown2318	0.301037	0.596563	18	9	3312.09	0.78513	1	28	6	14541.8	0.577276	1	23	8.21428	12891.1	1609.24	0.124833	10728	5381	8613	10607	15883	16631	14984	10669	16639	14142	10993	10942	14566	18473	13219	12616	12817.9
[truncated: 688 more rows]

## Sheet: unique cycling in AS
ID	CycID	JTK_pvalue	JTK_BH.Q	JTK_period	JTK_adjphase	JTK_amplitude	LS_pvalue	LS_BH.Q	LS_period	LS_adjphase	LS_amplitude	meta2d_pvalue	meta2d_BH.Q	meta2d_period	meta2d_phase	meta2d_Base	meta2d_AMP	meta2d_rAMP	X0	X0.1	X0.2	X0.3	X6	X6.1	X6.2	X6.3	X12	X12.1	X12.2	X12.3	X18	X18.1	X18.2	X18.3	AS
[truncated: 590 more rows]

[truncated: 6 more sheets: unique cycling AS in AM, shared cycling in AM and AS, 0.5 cycling in AM, 0.5 cycling in AS, total AM , total AS]
