# Supplementary material for: The microbiome interacts with the circadian clock and dietary composition to regulate metabolite cycling in the Drosophila gut
Source: eLife journal article supplement (doi:10.7554/elife.97130), 2024-05-01
Supplement: supp1 [file Table10-Biogenic amines-AM versus TM.xlsx]

## Sheet: unique cycling in AM
ID	CycID	JTK_pvalue	JTK_BH.Q	JTK_period	JTK_adjphase	JTK_amplitude	LS_pvalue	LS_BH.Q	LS_period	LS_adjphase	LS_amplitude	meta2d_pvalue	meta2d_BH.Q	meta2d_period	meta2d_phase	meta2d_Base	meta2d_AMP	meta2d_rAMP	X0	X0.1	X0.2	X0.3	X6	X6.1	X6.2	X6.3	X12	X12.1	X12.2	X12.3	X18	X18.1	X18.2	X18.3	AM
1	(-)-Riboflavin	0.0299489	0.0829149	24	12	2019.85	0.208098	1	26.0177	12	9889.5	0.0378801	0.117916	25.0088	12.0196	7927.4	2062.15	0.26013	5732	5779	5444	4628	8956	9034	6311	8970	10676	11065	9927	7890	5474	7074	8989	11995	7996.5
10	1,7-Dimethyluric acid	0.0419656	0.10784	24	21	307.238	0.30125	1	25.8651	6.63e-05	1778	0.0678973	0.189337	24.9326	23.3743	1761.04	368.958	0.209512	1997	1342	1782	1991	1525	1653	1445	1545	1149	1745	1728	1404	2157	1903	1946	2641	1747.06
13	1H-Indole-1-pentanoic acid, 3-[(2,2,3,3-tetramethylcyclopropyl)carbonyl]-	0.0065055	0.0255615	18	12	4659.13	0.133916	0.964981	20	12	29598.5	0.00700927	0.0315818	19	12.0333	24002.7	6549.79	0.272877	24986	16441	15989	23022	20781	26779	22467	27768	27238	30660	31308	29188	18901	17044	15346	23746	23229
14	1-Methyladenosine	0.0419656	0.10784	24	12	100.056	0.438744	1	23.9024	12	967	0.0919641	0.243273	23.9512	12.0001	866.498	116.587	0.13455	715	875	715	768	935	1017	717	890	959	858	1082	969	844	834	716	967	866.312
20	2'-Deoxyadenosine	0.0144977	0.0475569	18	15	21692.4	0.163117	0.980144	20	12	101110	0.016665	0.0624349	19	13.6167	71721.4	31934.6	0.445259	60358	68738	48743	73237	48166	41989	53716	47587	61737	111150	130067	101484	71189	56183	61662	106588	71412.1
27	2-Phenylacetamide	0.0144977	0.0475569	24	9	480.833	0.365726	1	23.9024	6	1628.75	0.0330837	0.106827	23.9512	7.49698	1123.82	484.435	0.43106	592	2103	660	656	2352	1646	1399	1118	1003	1569	1114	1273	852	451	472	705	1122.81
31	3-[5-(2-Methylpropyl)-3,6-dioxopiperazin-2-yl]propanoic acid	0.00164724	0.00965163	18	12	18085.3	0.0122981	0.9295	23.9024	12	89949.8	0.000239184	0.0038842	20.9512	12.2429	66791	33977.6	0.508714	45725	51150	30635	38726	83698	94136	70191	87591	90026	89746	94781	85246	38065	41573	34574	49650	64094.6
46	3-Methylhexahydropyrrolo[1,2-a]pyrazine-1,4-dione	0.0210199	0.0632056	24	12	2417.24	0.150362	0.966499	21.8859	12	10020.5	0.0213561	0.0755488	22.9429	12.0255	7367.71	3228.33	0.438172	6463	5941	4502	4328	7947	10140	5253	8137	10692	9045	12717	7628	6009	5653	3911	7798	7260.25
66	6-Hydroxycaproic acid	0.0419656	0.10784	18	9	809.637	0.669557	1	24.8451	6	5658.5	0.128467	0.317501	21.4225	7.94237	5120.7	751.223	0.146703	4417	4388	3711	4321	5880	7305	4424	5025	4600	5390	6875	5073	4099	4932	4396	5725	5035.06
85	Ala-Asn	0.000320124	0.00340574	24	12	1635.54	0.0193175	0.9295	23.9024	12	7310.5	8.04e-05	0.00235269	23.9512	12	5925.53	2020.66	0.341008	4471	5369	4383	4287	7659	6814	6335	6605	6595	7472	7235	7940	4555	4597	4683	5757	5922.31
87	Ala-Gln	0.00164724	0.00965163	24	12	3796.81	0.0381988	0.9295	23.9024	12	17250.5	0.000671611	0.00657936	23.9512	12	14207.8	4550.63	0.320292	11978	14022	9252	10445	17754	17455	14989	15385	15273	17588	18305	17836	11450	9960	11248	14268	14200.5
101	Ala-Thr	0.0210199	0.0632056	24	12	6321.36	0.0853482	0.9295	23.9024	12	35468.2	0.0131381	0.0516692	23.9512	12	30218.6	7554.15	0.249983	27682	29333	20392	24448	35074	38775	27267	33027	34537	33532	36497	37307	25921	24137	24110	31266	30206.6
102	Ala-Trp	0.0419656	0.10784	24	12	1101.32	0.165098	0.980144	23.9024	12	6661	0.0413774	0.12636	23.9512	12	5839.72	1272.16	0.217846	5225	6200	4132	4886	7290	7102	5253	6317	6422	6909	6660	6653	5362	4647	4271	6074	5837.69
104	Ala-Val	0.00980952	0.0347873	24	12	7668.22	0.0987078	0.946907	23.9024	12	51636.8	0.00768811	0.0338997	23.9512	12.0001	45357	9550.57	0.210565	41642	45116	33126	40587	53339	51563	46395	48637	46937	54521	53652	51437	40598	35850	33479	48589	45341.8
106	Allantoin	0.0210199	0.0632056	24	9	8674.79	0.15468	0.97563	23.9024	6.00002	34494.2	0.0218774	0.0768904	23.9512	7.49699	27267.9	9117.28	0.33436	18787	18711	24890	26134	25647	37028	30793	44509	28489	31711	37280	31017	15435	16996	17066	31489	27248.9
108	Androstane-3,17-diol	0.0210199	0.0632056	18	6	739.634	1	1	20	6	3001	0.102205	0.263107	19	6.01667	2349.46	811.446	0.345376	1296	1859	1140	1299	2995	2294	2270	4445	1308	1469	1447	995	1593	1731	7353	2524	2251.12
115	Arg-Phe	0.0419656	0.10784	18	6	8810.9	0.710386	1	20	5.99999	63958.8	0.134536	0.328192	19	6.01666	56180.6	7726.41	0.137528	57503	49995	45648	56286	68642	72207	52426	62560	54328	47473	47358	42208	57971	62677	43977	62650	55244.3
120	Asn-Ala	0.00980952	0.0347873	18	9	2484.95	0.107227	0.946907	24.0327	6	11521.5	0.00826458	0.0358472	21.0163	7.87756	9760.71	2543.07	0.260542	7035	9829	5631	6555	13358	13620	9927	9181	9661	11930	11612	10985	8425	8311	6246	8563	9429.31
131	Asn-Val	0.0144977	0.0475569	24	12	7009.37	0.112877	0.946907	23.7736	12	33053	0.0121347	0.0486061	23.8868	12.0003	26674.1	8966.92	0.336166	22202	27786	15260	18483	33292	37015	25230	25868	28997	36925	34278	32012	25253	21718	16967	24970	26641
138	Asp-Ile	0.000320124	0.00340574	24	12	8316.28	0.0326759	0.9295	22.4427	12	37993.8	0.000130419	0.00295662	23.2214	12.0135	29217.5	11062.8	0.378635	22309	26941	19327	21253	35440	34934	28549	27627	32293	39402	39745	40535	23681	23934	20530	26583	28942.7
140	Asp-phe	0.000987235	0.00692825	24	12	2891.36	0.0793869	0.9295	20	12	17266.5	0.000819318	0.00750031	22	12.1	13627.8	4390.7	0.322187	11365	14688	8261	9928	15573	15323	12596	12035	15335	18026	18205	17500	11433	11612	9630	12390	13368.8
142	Asp-Tyr	0.00164724	0.00965163	24	12	1064.9	0.0965782	0.945467	22.1053	12	5123	0.00155048	0.0109164	23.0526	12.0203	4023.21	1380.08	0.34303	2995	4262	2622	2900	5066	4465	4265	3392	4595	5964	4543	5390	3103	3517	2840	3790	3981.81
143	Asp-Val	0.000572095	0.00471842	24	12	2944.92	0.0308406	0.9295	22.5575	12	12273.5	0.000210757	0.0037248	23.2788	12.0115	9348.61	3722.63	0.398201	6949	8986	6416	6204	11563	11126	9519	8632	11440	13374	12372	11908	7448	8011	6116	8140	9262.75
144	Benthiavalicarb-isopropyl	0.00267199	0.0134688	18	12	359.387	0.0234938	0.9295	24.0327	12	3070.5	0.000670187	0.00657936	21.0163	12.2524	2612.49	696.822	0.266727	2359	2392	1667	2062	3179	3141	2746	2902	2923	3098	3279	2982	2274	2050	1719	2160	2558.31
148	Betaine aldehyde cation	0.00164724	0.00965163	18	12	767.564	0.0714019	0.9295	23.6461	12	6382.75	0.00118182	0.0091872	20.8231	12.2247	5284.48	1530.9	0.289697	4952	4523	3211	4379	5589	5867	5362	6570	6867	5820	7636	5208	4377	4140	3516	4514	5158.19
166	Cotinine	0.00980952	0.0347873	24	9	208.243	0.984019	1	22.9091	5.99999	3878.75	0.0544465	0.157379	23.4545	7.46915	1919.34	2124.91	1.10711	464	644	566	477	13325	807	768	615	623	8313	735	775	341	360	677	429	1869.94
170	Cyclo(Leu-Pro)	0.0210199	0.0632056	24	12	2935.02	0.149728	0.966499	20.2759	12	14934.2	0.0212793	0.0753388	22.1379	12.0855	11310.8	3994.34	0.353144	10984	8555	6578	8393	12207	13580	7913	10478	15143	15203	16601	12790	10106	9273	6214	13402	11088.8
171	Cyclo(prolyltyrosyl)	0.0419656	0.10784	18	12	507.172	0.39924	1	20	12	2192.5	0.0852645	0.228887	19	12.0333	1601.69	637.501	0.398019	1267	2145	916	964	1427	1507	1189	1391	2664	2412	2097	1597	1037	1056	805	1948	1526.38
175	Decanoyl-L-carnitine	0.0144977	0.0475569	18	9	207.713	0.163564	0.980144	20	6.00001	985.75	0.0167043	0.0625147	19	7.60001	680.692	238.159	0.349878	478	292	354	536	989	835	1028	1091	494	457	658	499	490	634	738	569	633.875
195	D-myo-Inositol, 1-[2-hydroxy-3-[(1-oxo-9,12-octadecadienyl)oxy]propyl hydrogen phosphate], [S-(Z,Z)]-	7.77e-06	0.000473861	18	6	48556	0.0877531	0.931721	20	6	83399.2	1.04e-05	0.000967577	19	6.01667	40474	45277	1.11867	14953	12634	12103	10464	81090	86706	88471	77330	6456	8339	13188	9823	53038	29223	30183	25796	34987.3
229	Glucuronic acid	0.0065055	0.0255615	18	3	120.208	0.25616	1	20	6.56e-05	1024.25	0.0123268	0.0491484	19	1.58336	916.112	162.964	0.177886	1058	1276	838	925	1012	892	883	944	808	647	748	864	1078	1053	962	1112	943.75
234	Glu-Leu	0.0210199	0.0632056	24	9	3984.9	0.0758132	0.9295	24.0327	6	26098.5	0.0118591	0.0476343	24.0163	7.50102	22791.6	4245.44	0.186272	20137	23140	17747	20577	28485	24896	25928	25085	21465	26731	25715	26658	21162	18070	16451	22466	22794.6
236	Glu-Met	0.00164724	0.00965163	24	12	2246.83	0.135488	0.965964	22.3291	12	10477	0.00209959	0.0133498	23.1646	12.0156	8253.8	2890.81	0.35024	6378	9068	5547	6041	10710	9551	8423	7030	8426	12539	9816	11127	6634	6653	6076	6812	8176.94
249	Gly-Gly-Gly	0.0210199	0.0632056	24	12	173.595	0.252979	1	20.464	12	909.75	0.0331644	0.106847	22.232	12.0764	710.701	235.268	0.331037	461	776	544	464	957	781	666	492	726	1021	835	1057	567	605	516	703	698.188
251	Gly-Ile	0.0299489	0.0829149	24	12	4138.52	0.210151	1	23.7736	12	30703	0.038192	0.118546	23.8868	12.0003	26843.6	5286.5	0.196937	24473	26976	18408	22919	31172	32537	25119	26791	27551	31842	32214	31205	25887	22826	20033	29232	26824.1
253	Gly-Phe	0.0210199	0.0632056	24	12	4028.03	0.147405	0.966499	24.0327	12	19443.5	0.0209977	0.074893	24.0163	12	16178.4	4748.01	0.293478	14246	16918	8491	12016	19802	21676	14240	17901	19156	19499	19955	19164	13480	14045	10816	17490	16180.9
259	Gly-Thr	0.000572095	0.00471842	24	12	2884.11	0.0303765	0.9295	23.7736	12	13328.2	0.000207848	0.00370531	23.8868	12.0003	10726.3	3664.24	0.341611	8919	10200	6698	7631	13654	12828	10718	11768	11832	14117	14240	13124	8765	7876	8937	10098	10712.8
272	His-Ala	0.0299489	0.0829149	24	12	1070.21	0.170733	0.981551	24.1644	12	7970.75	0.0320905	0.104318	24.0822	12.0001	6915.56	1323.01	0.191309	6752	6448	4405	5700	8254	7818	6285	6967	7737	7617	7929	8600	6430	5995	5988	7781	6919.12
280	His-Pro	0.000320124	0.00340574	24	12	8532.3	0.0423327	0.9295	20.6557	12	30844	0.000165453	0.00336731	22.3279	12.0677	20442.1	12222.6	0.597912	13535	14616	10291	11782	22390	26650	14274	21227	31767	30862	37007	23740	14219	13975	10878	19951	19822.8
286	His-Trp	0.0299489	0.0829149	24	12	1499.77	0.197555	1	21.0501	12	9437.25	0.0362686	0.114047	22.5251	12.0517	7370.44	2119.51	0.287569	5922	7441	4095	5525	8449	7853	5816	6194	7682	9336	10838	9893	6178	6495	5420	9253	7274.38
288	His-Val	0.0144977	0.0475569	24	12	2195.92	0.131942	0.964981	23.6461	12	10991.8	0.0138857	0.054118	23.8231	12.0007	9028.67	2630.99	0.291404	7795	8631	5838	6932	10548	11761	8341	9148	10144	10713	12455	10655	7570	6800	6361	10524	9013.5
294	Ile-Gln	0.0144977	0.0475569	24	12	8100.62	0.196916	1	24.0327	12	47953.8	0.0195806	0.0707713	24.0163	12	40996.9	9404.65	0.229399	37623	40389	25881	31636	49511	49554	39785	40009	40264	46734	53289	51528	34727	35081	33314	46706	41001.9
308	Ile-Val	0.0210199	0.0632056	24	12	20810.5	0.171917	0.981551	23.7736	12	105790	0.0239334	0.0825751	23.8868	12.0003	87219.8	25233.7	0.289312	83695	84875	47828	62206	110308	103318	73290	100422	98853	111029	111155	102123	77734	69951	57998	99241	87126.6
327	Leu-Gln	0.0210199	0.0632056	24	12	12042	0.154112	0.974165	24.0327	12	61409.8	0.0218089	0.0768096	24.0163	12	51450.8	14825.8	0.288155	43545	55822	30944	35732	62844	71856	50958	49365	55596	62798	64233	63012	44100	45958	33952	52625	51458.8
344	Lidocaine	0.0299489	0.0829149	24	9	1417.93	0.464066	1	22.9091	6	5009.5	0.0733272	0.201263	23.4545	7.46916	3151.43	1736.37	0.55098	1389	5061	2389	1167	8856	4532	3725	2925	2448	5375	2410	3479	2967	1076	502	1476	3111.06
358	Lys-Trp	0.00980952	0.0347873	18	9	2408.41	0.109529	0.946907	24.0327	6	13244.5	0.00841918	0.0362017	21.0163	7.87756	11652.8	2283.96	0.196001	9788	11824	7497	8273	15206	13841	12228	11703	11725	14138	13335	11953	9244	10909	9011	11008	11355.2
361	Malic acid	0.00421867	0.0189687	18	6	3829.34	0.0702919	0.9295	20	6	34015.2	0.00270542	0.015764	19	6.01667	30041.3	3513.98	0.116972	30442	29674	27859	30522	37421	32290	33041	33309	25977	22859	25251	29468	30801	28835	27912	28187	29615.5
370	Met-Asn	0.00164724	0.00965163	24	12	660.084	0.089631	0.935067	23.1496	12	2762.5	0.00144997	0.0105519	23.5748	12.0039	2137.39	828.275	0.387518	1588	2427	1216	1427	2606	2798	2050	2086	2722	2904	2983	2441	1790	1854	1232	1892	2126
382	Methylpropionic acid	0.0419656	0.10784	18	9	1279.69	0.286393	1	23.7736	6.00001	7122.75	0.0651566	0.182607	20.8868	7.85742	5795.93	1573.14	0.271421	3823	7438	3900	3717	9249	6770	5863	6609	5061	8125	7025	5037	4281	3431	4119	4880	5583
387	Met-Thr	0.0419656	0.10784	24	12	1225.77	0.172236	0.981551	24.0327	6	5339.25	0.0428605	0.130236	24.0163	9.00205	4480.77	1209.17	0.269858	3820	4547	2457	3267	6442	6324	4142	4449	4620	5898	5483	5332	4226	3627	2687	4386	4481.69
393	Myristoyl-L-carnitine	0.000572095	0.00471842	18	6	32245.3	0.698773	1	20	5.99999	105538	0.00352777	0.0188584	19	6.01666	76682	33333.2	0.434694	58171	36148	36267	59491	101127	113834	89379	117813	54920	50077	55555	56801	100325	86697	61994	83684	72642.7
396	N,N'-Diacetylcystine	0.00980952	0.0347873	18	15	40.6586	0.789504	1	20	12	270.25	0.0453895	0.136674	19	13.6167	241.734	50.0069	0.206867	268	332	210	236	225	209	179	187	265	309	257	250	222	239	239	233	241.25
411	N-Acetyl-DL-valine	0.00980952	0.0347873	24	12	3527.76	0.0297731	0.9295	20	12	22579.5	0.002669	0.0156808	22	12.1	15405.9	7384.19	0.47931	12851	11813	11151	10872	13186	14046	11623	14368	22333	24108	25047	18830	8858	11707	13420	15311	14970.2
412	N-Acetyl-D-phenylalanine	0.00267199	0.0134688	24	12	4111.47	0.0464201	0.9295	20	12	21460.8	0.00123972	0.00951768	22	12.1	13564.6	8464.65	0.624027	10397	8284	9804	7786	10650	13223	9761	14187	20281	23819	26213	15530	6326	8862	11877	12043	13065.2
413	N-Acetyl-epsilon-caprolactam (double check)	0.0144977	0.0475569	24	12	788.954	0.0702329	0.9295	20	12	5402	0.00803343	0.0350653	22	12.1	3845.93	1628.28	0.423376	3373	3177	2973	2392	3479	3265	3094	3987	5548	5553	6424	4083	2222	2811	3784	3833	3749.88
414	N-Acetylglucosamine	0.00980952	0.0347873	18	15	396.687	0.200072	1	20	12	2468.75	0.0141965	0.0550813	19	13.6167	2065.14	511.757	0.247807	1991	2375	1756	2148	1584	1856	1634	1664	2304	2333	2702	2536	2163	1805	1687	2425	2060.19
415	N-Acetylhistidine	0.00421867	0.0189687	18	15	1034.14	0.27158	1	20	12	6099.25	0.00890411	0.0379477	19	13.6167	4946.6	1494.78	0.302183	5597	4505	5281	4815	3343	4060	3292	4830	6238	5964	6989	5206	3632	4765	5131	5266	4932.12
416	N-Acetylleucine	0.0144977	0.0475569	18	9	690.136	0.396541	1	27.6489	6.00002	3700	0.0354062	0.111928	22.8245	8.18265	3266.29	492.256	0.150708	2763	1912	2344	2674	3678	3789	3238	4095	3293	3566	4079	2859	2802	3534	3462	3752	3240
417	N-Acetyl-leucine (double check)	0.0210199	0.0632056	24	12	2708.57	0.080821	0.9295	20	12	16940	0.0125338	0.0498358	22	12.1	11917.6	5264.41	0.441733	10498	10013	9013	7109	10367	10093	10105	12071	16605	17424	20751	12980	6343	8286	11620	12435	11607.1
420	N-Acetylphenylalanine	0.00164724	0.00965163	24	12	766.504	0.0487325	0.9295	20	12	4502	0.000837265	0.00763233	22	12.1	2870.48	1742.37	0.606998	2257	1834	2048	1623	2275	2654	2326	2855	4445	4954	5515	3094	1411	1829	2624	2539	2767.69
421	Nafadotride	0.00164724	0.00965163	18	12	247.487	0.0427191	0.9295	20	12	919.5	0.000743217	0.0070573	19	12.0333	646.147	303.339	0.469458	437	625	327	429	796	554	580	565	1023	999	783	873	432	395	425	522	610.312
429	N-L-.gamma.-Glutamyl-L-leucine	0.00421867	0.0189687	18	12	44024.5	0.0120564	0.9295	23.9024	12	204862	0.000553705	0.00596682	20.9512	12.2429	151528	78548.2	0.518374	95948	104798	72880	91147	194720	216225	155232	205120	187850	209588	222357	199655	90729	86253	79802	112407	145294
430	N-Lauroyl-L-arginine	0.0210199	0.0632056	18	6	3050.64	0.997455	1	20	6	14662.5	0.101998	0.263107	19	6.01667	12471.9	2653.54	0.212762	10774	7916	9086	10996	16689	15562	14026	12373	7800	11955	11158	8842	15985	14805	11789	14649	12150.3
440	Octanoylcarnitine	0.000572095	0.00471842	18	9	92.2774	0.336436	1	20	6.00001	445	0.00183919	0.0120817	19	7.60001	368.611	83.5494	0.22666	273	246	210	290	462	472	443	403	344	345	384	371	266	330	437	359	352.188
445	Orthanilic acid	0.0065055	0.0255615	18	3	100.232	0.390321	1	23.7736	6.63e-05	864.248	0.0177134	0.0652202	20.8868	1.7406	690.894	283.9	0.410917	712	1476	616	653	664	789	408	502	536	486	589	349	853	886	946	965	714.375
455	Phe-Asn	0.00267199	0.0134688	24	12	1637.66	0.0899477	0.935067	22.6735	12	7887.25	0.0022432	0.0140565	23.3368	12.0097	6180.04	2142.12	0.346618	4999	6531	3625	4204	7568	7335	5525	6204	7040	7849	9185	7475	5311	5020	4189	6092	6134.5
456	Phe-Gln	0.0299489	0.0829149	18	9	1954.09	0.365633	1	24.1644	12	14576.2	0.0603843	0.171452	21.0822	10.5052	13098.2	2251.72	0.171911	10707	14252	7520	10774	15317	16316	13076	12859	12593	14884	15840	14988	11809	11485	8229	14537	12824.1
469	Phe-Pro	0.0065055	0.0255615	24	12	1183.34	0.0470447	0.9295	20	12	5763.25	0.00278253	0.0159581	22	12.1	4020.06	1907.95	0.474608	3228	3314	2242	2712	4003	4352	2766	4036	6098	5598	6521	4836	3249	3039	2241	4285	3907.5
485	Pro-Glu b	0.00980952	0.0347873	24	12	1106.27	0.0583326	0.9295	23.6461	12	4641.25	0.00484437	0.0237287	23.8231	12.0007	3635.8	1363.57	0.375039	2978	2823	2494	2705	4374	4757	3476	3919	3901	4953	5411	4300	3080	2605	2303	3968	3627.94
506	PyroGlu-Met	0.00164724	0.00965163	24	12	2471.16	0.0163405	0.9295	23.6461	12	7107.75	0.000310155	0.00441767	23.8231	12.0007	4962.51	3015.58	0.607673	3550	3823	2354	3043	6899	6966	4933	5798	6890	7161	7696	6684	3092	3477	2663	4093	4945.12
507	PyroGlu-Phe	0.00421867	0.0189687	24	12	9106.83	0.0199861	0.9295	23.9024	12	30260.5	0.000875266	0.00778801	23.9512	12	22823.4	11158.8	0.488922	18246	20394	11565	15437	28381	30228	23537	30362	31742	26968	32509	29823	16109	17421	13242	18925	22805.6
510	PyroGlu-Trp	0.000572095	0.00471842	24	12	2800.85	0.0136151	0.9295	23.52	12	8170.5	9.94e-05	0.00251725	23.76	12.0012	5485.68	3651.08	0.665565	3459	4018	2500	3381	7141	7381	6086	6417	6790	8419	8641	8832	3531	3196	3168	4355	5457.19
511	PyroGlu-Val	0.00421867	0.0189687	24	12	12706.2	0.0126476	0.9295	24.0327	12	30681.2	0.000578301	0.00609924	24.0163	12	21153.1	14828.8	0.701023	13167	14689	9124	11621	31236	31749	23491	29452	26491	31194	33743	31297	13316	11295	9965	16747	21161.1
515	Riboflavin	0.0299489	0.0829149	24	15	2583.41	0.184254	0.993547	25.8651	12	13816.5	0.0342112	0.109244	24.9326	13.5751	10942	3542.5	0.323754	7756	7951	7492	5969	11714	12543	8912	11669	14840	16117	13360	10949	7451	10027	12645	16659	11003.4
516	Ribose A	0.0144977	0.0475569	18	3	730.795	0.300794	1	26.0177	6.63e-05	12933.7	0.0280624	0.0939026	22.0088	1.8341	12674.6	3013.87	0.237789	14753	9804	12990	14188	11533	12681	10580	11255	8932	13225	12233	9476	15744	14875	14133	18437	12802.4
523	Ser-Ala	0.0065055	0.0255615	24	9	2913.28	0.0411471	0.9295	24.0327	6	13874	0.00246956	0.0149707	24.0163	7.50102	11716.3	3027.14	0.258371	10065	11519	8092	8843	15512	14695	12193	13096	12058	14297	14191	13911	9797	8966	8804	11455	11718.4
531	Ser-Leu	0.0065055	0.0255615	24	9	4542.81	0.0905651	0.935067	23.9024	6	28337.2	0.00497071	0.0242106	23.9512	7.49697	24556.3	4811.63	0.195943	23280	24685	17453	21376	28527	29468	25653	29701	24666	28919	28415	26589	22551	18238	17774	25446	24546.3
533	Ser-Met	0.0419656	0.10784	24	12	6672.26	0.337094	1	24.4321	12	37416.5	0.0743856	0.203983	24.2161	12.001	32937.1	6361.33	0.193136	29053	34285	21657	25960	38043	39968	30198	35751	31248	39093	38620	40705	27975	28161	27605	39394	32982.2
538	Ser-Thr	0.0419656	0.10784	18	9	1460.18	0.485703	1	23.9024	6.00002	11424.8	0.0997343	0.259369	20.9512	7.86741	10262.9	1658.59	0.161611	8736	11669	6696	8387	12832	13949	9729	9189	9565	12527	10392	11923	9723	8985	7358	9020	10042.5
540	Ser-Tyr	0.0299489	0.0829149	24	12	3388.46	0.137609	0.965964	23.1496	12	22647.5	0.0267534	0.0902901	23.5748	12.0039	19271.1	4419.21	0.229318	17980	18625	13612	16433	20423	23211	17899	20630	19594	22488	25509	22999	17101	15096	15283	20482	19210.3
541	Ser-Val	0.0144977	0.0475569	24	12	43128.4	0.0976036	0.945467	24.0327	12	230667	0.0106985	0.0439375	24.0163	12	197927	52387.6	0.264681	188210	182040	128221	166491	227580	264211	190460	226412	206802	241753	246079	228035	179034	145733	139138	207085	197955
544	Stanozolol	0.00267199	0.0134688	18	6	1425.53	0.178257	0.990633	20	6	4161	0.00411976	0.021036	19	6.01667	2651.28	1600.69	0.603742	1849	1162	1697	1927	5166	4223	3018	4237	1041	2061	2573	1039	2632	2758	1984	1950	2457.31
558	Thr-Gln	0.00267199	0.0134688	24	12	1680.44	0.0952629	0.943909	24.4321	12	9433	0.00236114	0.0145637	24.2161	12.001	8121.09	2027.76	0.24969	6696	8138	5446	5643	10739	8619	8930	8873	8371	9176	9310	10875	7171	6906	6500	8775	8135.5
562	Thr-Leu	0.0299489	0.0829149	24	12	4695.54	0.198783	1	24.0327	12	28508.2	0.0364571	0.114474	24.0163	12	24982.9	5532.56	0.221454	23057	26017	16327	20397	29013	32041	23614	27328	25972	29579	30224	28258	22601	21025	17131	27190	24985.9
566	Thr-Thr	0.0121536	0.0429944	24	9	2391.44	0.151316	0.966499	23.9024	6	14192.2	0.0134223	0.0525959	23.9512	7.49698	11742.7	2882	0.245429	10141	12879	8064	9976	14941	17193	13373	11262	11735	14915	12781	12879	10607	9677	6775	10589	11736.7
572	Thymidine	0.0210199	0.0632056	24	18	5278.55	0.28026	1	20.1831	12	24348.2	0.0361374	0.113883	22.0915	14.8517	20008.8	8550.87	0.427356	19041	16797	16597	23827	11369	13694	14468	14459	14734	23538	29635	29486	23901	18890	18401	32440	20079.8
598	Tyr-Thr	0.0065055	0.0255615	24	12	5358.63	0.147533	0.966499	23.7736	12	27347.2	0.00762908	0.0336737	23.8868	12.0003	22602.6	6205.82	0.274562	18800	20694	14932	18412	26682	28259	20435	23313	21436	29746	30031	28176	19730	18607	16207	25815	22579.7
606	unknown1001	0.0419656	0.10784	24	9	741.578	0.229676	1	24.0327	12	4929.25	0.0543803	0.157292	24.0163	10.499	4381.44	800.808	0.182773	4071	4617	2755	3864	5554	5376	4267	4467	4281	5060	5118	5258	3678	3692	3441	4613	4382
610	unknown1005	0.0210199	0.0632056	18	15	798.324	0.159535	0.979097	20	12	5901	0.0224603	0.0786153	19	13.6167	4769.8	1173.34	0.245993	4210	4920	3626	4664	3821	3983	3475	4408	4932	5555	6340	6777	4619	4315	4157	6333	4758.44
613	unknown1008	0.0419656	0.10784	18	0	298.046	0.631003	1	20	17.9999	4340	0.12264	0.3066	19	18.05	4062.79	367.428	0.0904373	4908	5356	3432	4182	3410	3800	3437	3835	4072	4129	4108	4253	4266	4312	4047	4735	4142.62
619	unknown1013	0.0144977	0.0475569	24	0	1288	0.192619	0.997653	24.7059	6.63e-05	7326.74	0.0192149	0.0697404	24.3529	3.27e-05	5908.46	1644.82	0.278384	7800	9678	5233	6596	4878	5614	4198	5290	4614	4660	4674	5367	6173	7183	5560	6725	5890.19
634	unknown1027	0.0210199	0.0632056	18	9	999.142	0.255016	1	23.52	6	6805.25	0.0333885	0.107409	20.76	7.83796	5827.12	1199.97	0.205929	5654	5564	3420	4321	7067	8509	5165	6480	6180	5502	6235	6977	4786	4425	4422	5835	5658.88
639	unknown1031	0.00980952	0.0347873	18	9	4301.86	0.695102	1	25.4179	5.99999	28572	0.0408306	0.124944	21.7089	7.98947	25515.7	3052.03	0.119614	21767	20933	20889	21847	29431	34783	22160	27914	26587	23049	28374	25745	22213	26465	27079	24030	25204.1
653	unknown1044	0.0299489	0.0829149	18	0	869.565	0.76197	1	20	17.9999	6000	0.109083	0.277678	19	18.05	5684.82	959.855	0.168845	7023	9498	4760	7359	4300	5095	4057	5314	5146	5318	6124	6300	6539	5918	5282	6261	5893.38
657	unknown1048	0.0419656	0.10784	24	9	526.795	0.341198	1	25.1282	6	5041.75	0.075118	0.205471	24.5641	7.53842	4573.3	580.045	0.126833	4565	4771	3675	4857	4997	5793	4578	4799	4493	4908	5529	4705	4580	3410	3451	4286	4587.31
686	unknown1074	0.0177588	0.0582101	24	9	1567.66	0.0842729	0.9295	24.0327	6	8034	0.0112312	0.0456203	24.0163	7.50102	6914.61	1628.05	0.235451	6352	7026	4606	5775	8918	8569	6860	7789	7808	8176	8569	7460	5760	4830	4890	7264	6915.75
690	unknown1078	0.00164724	0.00965163	18	12	1921.92	0.0412977	0.9295	23.7736	12	16392.2	0.000720791	0.00690492	20.8868	12.2337	14011.6	3387.67	0.241775	12870	12787	9541	12026	16412	16318	13755	14925	15520	17189	17035	15825	11474	10187	10298	13637	13737.4
697	unknown1084	0.00980952	0.0347873	24	9	1917.67	0.0769247	0.9295	24.0327	6.00002	11108.2	0.00617963	0.02899	24.0163	7.50103	9723.09	2019.03	0.207653	9201	9916	6711	8436	11735	11744	9767	11187	10431	11726	11551	10621	8370	7040	7227	9929	9724.5
700	unknown1087	0.0210199	0.0632056	24	12	2395.15	0.0761503	0.9295	24.0327	12	14037	0.0119047	0.0477733	24.0163	12	12327.9	2825.04	0.229159	10680	12036	8972	10402	14444	15185	12765	13715	12081	15116	15182	13769	11095	9738	9145	12945	12329.4
701	unknown1088	0.000171384	0.00241724	18	12	1557.93	0.0144205	0.9295	23.7736	12	8018	3.44e-05	0.00160069	20.8868	12.2337	6090.63	2738.91	0.449692	4690	4144	3909	4563	6661	7676	6086	8201	8564	7827	8266	7415	3700	3999	3935	4267	5868.94
707	unknown1093	0.0065055	0.0255615	24	9	846.584	0.0472937	0.9295	23.9024	5.99999	5260	0.00279563	0.016012	23.9512	7.49697	4546.85	945.191	0.207878	3984	4456	3433	3989	6077	5342	4772	4849	4627	5081	5185	5476	4023	3803	3420	4201	4544.88
708	unknown1094	0.00980952	0.0347873	24	12	1599.12	0.0482746	0.9295	24.0327	6.00001	10079.8	0.0040987	0.0210028	24.0163	9.00205	8819.7	1641.61	0.18613	7788	8417	6379	8110	11085	9842	9864	9528	8941	10016	10180	10393	8043	7288	6520	8741	8820.94
712	unknown1098	0.0210199	0.0632056	18	12	329.512	0.227527	1	23.9024	12	5750.25	0.0303349	0.0998101	20.9512	12.2429	5183.98	836.104	0.161286	4976	5433	3307	4540	5781	6006	4985	5686	5220	5377	6033	6371	4808	4023	4178	5158	5117.62
718	unknown1102	0.0065055	0.0255615	24	21	973.686	0.118219	0.955018	24.0327	17.9999	4530.49	0.00628359	0.0292609	24.0163	19.501	3991.73	1047.57	0.262435	4787	6277	3941	4282	3085	2881	3389	3356	3344	3117	3377	3898	4673	4843	3743	4863	3991
730	unknown1113	0.0419656	0.10784	18	9	966.261	0.63207	1	20	5.99998	6304	0.122803	0.30674	19	7.59999	5441.01	1048.61	0.192723	4261	5742	3076	3752	8277	6193	5554	5192	5013	4907	5994	6276	5174	4688	3835	5824	5234.88
734	unknown1117	0.0299489	0.0829149	24	12	1622.81	0.19126	0.994309	24.5682	12	12580.2	0.0352984	0.111734	24.2841	12.0016	11127.9	1955.94	0.175769	10173	10053	7731	9849	12306	13653	10112	11774	11837	13017	13783	11684	10905	9883	9113	12466	11146.2
745	unknown1127	0.00421867	0.0189687	24	12	1140.21	0.10885	0.946907	24.0327	12	6350.75	0.00398864	0.0206342	24.0163	12	5425.06	1413.83	0.260612	5034	5580	3048	4169	7005	6399	5739	5531	5790	6409	6426	6778	5130	4491	3871	5413	5425.81
759	unknown114	0.0419656	0.10784	18	3	386.08	0.642696	1	24.5682	6.63e-05	9189.45	0.124417	0.310148	21.2841	1.77371	5455.61	8160.56	1.49581	7999	27689	958	112	1113	643	1761	34	608	43	916	635	2897	23907	3654	23093	6003.88
765	unknown1145	0.0210199	0.0632056	18	12	378.302	0.523835	1	20	12	5237.75	0.0606578	0.17202	19	12.0333	4742.1	597.08	0.12591	4605	5356	3538	4157	5430	4640	4854	4326	4700	5101	5401	5749	4294	4063	3989	4542	4671.56
770	unknown115	0.0419656	0.10784	24	21	1817.79	0.783294	1	25.8651	6.63e-05	3064.48	0.145132	0.346845	24.9326	23.3743	2921.23	4391.92	1.50345	6666	5401	181	10	7	32	252	15	68	9	55	168	22649	4496	1468	2601	2754.88
775	unknown1154	0.0065055	0.0255615	18	3	792.667	0.26233	1	20	4.94e-05	6967.75	0.0125831	0.0499402	19	1.58336	6336.27	1095.54	0.172899	7240	7792	5489	7350	6820	6747	5297	6250	4998	5180	5849	5703	7559	7686	6441	7952	6522.06
778	unknown1157	0.0419656	0.10784	24	0	1441.79	0.732246	1	25.5652	6.63e-05	6021.48	0.137745	0.334057	24.7826	3.21e-05	3382.33	2547.15	0.753075	4028	14119	3546	2393	3796	1066	3594	1696	1129	749	632	2922	4295	3924	3952	1321	3322.62
780	unknown1159	0.00267199	0.0134688	24	12	2570.33	0.0332728	0.9295	24.0327	12	8917.25	0.000918204	0.00801577	24.0163	12	6977.36	3069.1	0.439866	5181	6901	3677	4783	10260	9023	7404	7907	8036	7998	9343	10292	5131	5019	4884	5825	6979
801	unknown1178	0.0144977	0.0475569	24	12	1411.39	0.21256	1	24.5682	12	8367.5	0.0209005	0.0746694	24.2841	12.0016	7085.66	1733.17	0.244603	5580	7069	4269	5464	9608	8721	6470	6537	7240	7978	9397	8855	6002	6705	5899	7836	7101.88
805	unknown1181	0.00980952	0.0347873	24	12	3667.41	0.0806366	0.9295	23.9024	12	18069.5	0.00644054	0.0297944	23.9512	12	14995.6	4537.95	0.302619	12508	15238	9788	10749	19552	16384	17005	15641	14883	18235	17526	21634	12248	11820	11510	15093	14988.4
837	unknown121	0.000320124	0.00340574	18	6	20666.6	0.380814	1	20	6.00001	65369	0.00122057	0.00942081	19	6.01667	45104.4	21053.1	0.466764	37651	43584	21506	26332	62583	80406	48049	70438	23768	31120	26673	20897	61507	44330	35199	46808	42553.2
838	unknown1210	0.0210199	0.0632056	24	12	4117.13	0.129156	0.963963	23.9024	12	23445.2	0.0187569	0.0683073	23.9512	12	20035.1	5031.12	0.251115	19616	18174	13092	16540	22342	25435	19440	22379	19334	25589	25442	23416	17886	15535	14894	21320	20027.1
861	unknown1231	0.0419656	0.10784	24	9	954.594	0.40885	1	23.9024	12	9219.25	0.0869088	0.23258	23.9512	10.5031	8426.89	1027.28	0.121905	8682	8604	5981	7711	9738	9645	7552	9033	8828	8768	10151	9130	7835	7031	7536	8571	8424.75
866	unknown1236	0.0210199	0.0632056	24	12	2506.34	0.119705	0.960278	20	12	13325.8	0.0175755	0.0648782	22	12.1	9881.5	3710.01	0.37545	8515	8295	7063	6303	9540	11055	6968	9863	12888	14140	15570	10705	8397	6633	6523	12144	9662.62
870	unknown124	0.0299489	0.0829149	18	6	14199.8	0.992755	1	20	6	54580.2	0.134256	0.327693	19	6.01667	44696.6	11393.8	0.254915	47042	31698	23982	33658	55285	63422	45346	54268	27753	44091	32396	26581	66296	56235	34740	50262	43315.9
876	unknown1245	0.0144977	0.0475569	24	21	1080.81	0.133025	0.964981	23.9024	17.9999	3944.99	0.0139839	0.0544518	23.9512	19.497	3107.19	1132.77	0.364564	3904	5102	2691	3400	2750	2036	1808	2159	3396	1814	2264	2649	3354	3633	3855	4938	3109.56
893	unknown1260	0.0065055	0.0255615	24	12	3183.57	0.129689	0.963963	23.6461	12	17511.2	0.00681512	0.0309974	23.8231	12.0007	14597	3802.16	0.260475	13215	14319	9032	11386	17632	17585	12646	15413	16256	16667	19231	17891	12235	11791	11705	16198	14575.1
899	unknown1266	0.00164724	0.00965163	24	12	1325.83	0.0674705	0.9295	23.3952	12	7322.25	0.00112304	0.00895536	23.6976	12.002	6024.23	1692.21	0.280901	5253	6289	3843	4307	6988	6490	6425	6256	6377	7026	7605	8281	4981	4937	5044	6020	6007.62
913	unknown1279	0.0299489	0.0829149	24	12	1349.69	0.188665	0.994309	24.2975	6	9028	0.0348967	0.111187	24.1488	9.01882	7889.93	1465.38	0.185727	7246	7296	4816	6976	10667	8804	8319	8322	7955	8424	9149	9811	7485	6211	6269	8650	7900
921	unknown1286	0.000572095	0.00471842	24	12	2647.41	0.0293985	0.9295	23.52	12	11508.8	0.000201707	0.00370081	23.76	12.0012	8877.71	3429.84	0.386343	6920	7762	5615	6040	11589	9744	9723	8742	10439	10896	11403	13297	6427	6849	7350	8819	8850.94
925	unknown129	0.000171384	0.00241724	18	6	7112.43	0.359146	1	20	6	18993	0.000658337	0.00650822	19	6.01667	12164.1	7290.98	0.599383	8321	5666	7377	7456	20898	22021	13958	19095	4033	7276	8673	3766	15528	14763	12307	9352	11280.6
932	unknown1296	0.00421867	0.0189687	18	3	237.234	0.234187	1	25.7143	6.63e-05	2045.5	0.00782449	0.0344309	21.8571	1.82146	1951.96	673.381	0.344977	2220	2021	1507	2434	2143	1867	1589	1350	1248	1251	1810	1877	2792	2833	2199	2599	1983.75
937	unknown130	0.00421867	0.0189687	18	6	3901.82	0.807574	1	20	6	15519.5	0.0227647	0.0793009	19	6.01667	13271.9	2214.09	0.166825	15442	11166	8616	11477	17253	18555	12848	13422	6455	8450	8713	5902	23040	18141	11498	17079	13003.6
938	unknown1300	0.0144977	0.0475569	18	9	1818.33	0.575834	1	22.5575	5.99999	11777.2	0.0483006	0.144037	20.2788	7.76663	10065.8	1949.01	0.193627	8625	11820	5785	6887	15199	10876	11307	9727	9718	9106	9320	13663	9094	7997	7849	9159	9758.25
980	unknown1339	0.00267199	0.0134688	24	12	1718.45	0.212263	1	24.2975	12	13555.5	0.00480665	0.0235973	24.1488	12.0005	11682.3	2182.91	0.186856	10230	10531	8183	9950	12946	13472	11221	11101	11417	12310	15413	15082	9986	10789	10679	13777	11692.9
988	unknown1346	0.0299489	0.0829149	24	12	1633.24	0.293078	1	24.8451	12	16562.5	0.0503433	0.148315	24.4225	12.0036	14798.3	2269.93	0.153391	14013	13645	10115	12873	17643	17500	13625	13986	15224	15345	17605	18076	13540	13716	13739	16634	14829.9
998	unknown1355	0.0210199	0.0632056	24	12	1245.75	0.183924	0.993547	22.6735	12	9272.5	0.0253441	0.0864879	23.3368	12.0097	7889.47	1744.92	0.221171	7504	7956	4942	6851	8510	8976	7727	7941	7885	9572	9720	9913	7320	6285	6113	8423	7852.38
1002	unknown1359	0.0065055	0.0255615	24	12	1427.47	0.141942	0.966499	23.2718	12	8405.75	0.00737564	0.0327814	23.6359	12.0029	7026.65	1814.17	0.258184	6570	6418	4624	6085	7718	8825	6862	6895	6937	8587	8881	9218	6376	5280	5266	7542	7005.25
1022	unknown1377	0.0144977	0.0475569	18	9	719.835	0.194647	1	20	6	5334	0.0193876	0.0702497	19	7.6	4562.94	762.138	0.167028	4428	4006	3469	3580	5499	5969	4132	5736	4492	3810	4840	4644	3941	4127	4305	3632	4413.12
1032	unknown1386	0.00421867	0.0189687	24	0	906.688	0.151304	0.966499	24.1644	6.63e-05	5191.74	0.00533408	0.0255493	24.0822	3.3e-05	4145.44	1359.4	0.327926	5485	6952	4021	4309	4013	3235	3604	3590	3609	2352	2778	3818	5153	4458	4870	4022	4141.81
1033	unknown1387	0.00980952	0.0347873	18	12	1200.31	0.157454	0.97563	20.9501	12	6790	0.0115425	0.0465353	19.4751	12.0692	5521.32	1415.43	0.256357	4557	4496	3517	5029	5854	6700	4570	5085	5689	6882	7902	6687	4306	4130	4164	6259	5364.19
1038	unknown1391	0.0144977	0.0475569	24	0	606.698	0.199637	1	23.3952	6.63e-05	3810.75	0.0198114	0.0714266	23.6976	3.36e-05	3294.71	762.442	0.231414	4114	4497	3172	3460	3352	2666	3263	2984	2713	2262	2460	3331	4285	3723	3404	3154	3302.5
1053	unknown1404	0.000987235	0.00692825	24	12	966.085	0.0278969	0.9295	23.3952	12	4484.75	0.000316715	0.00444112	23.6976	12.002	3547.46	1263.59	0.356195	3080	3158	2677	2348	4529	3712	3764	3858	4199	4392	4234	5114	2723	2629	2811	3333	3535.06
1058	unknown1409	0.0419656	0.10784	24	12	532.098	0.315096	1	25.4179	12	6192.25	0.0704239	0.194971	24.7089	12.0099	5619.83	704.445	0.12535	5376	5286	4274	4562	6296	6539	5295	5393	6054	5654	5942	7119	5637	5222	5204	6329	5636.38
1062	unknown1412	0.00421867	0.0189687	18	3	792.313	0.0277735	0.9295	24.0327	6.63e-05	3063.74	0.00117775	0.00917208	21.0163	1.75139	1933.31	1536.3	0.794647	3093	4063	2037	3062	1386	1085	888	736	755	833	870	1300	4219	3325	2400	2786	2052.38
1085	unknown1433	0.0210199	0.0632056	24	0	619.779	0.321075	1	23.6461	6.63e-05	4200.49	0.0404827	0.124231	23.8231	3.34e-05	3409.63	1004.96	0.29474	4363	5947	2963	3529	3728	2763	3257	2888	2688	2263	2103	3239	4379	3567	3562	3410	3415.56
1097	unknown1444	0.000987235	0.00692825	18	12	1519.4	0.0153641	0.9295	23.7736	12	8231	0.000183477	0.00351712	20.8868	12.2337	6456.8	2461.47	0.381222	4922	4837	3916	4839	8147	7802	6573	7243	7468	7888	8867	8701	4786	4497	4040	5595	6257.56
1177	unknown1516	0.0065055	0.0255615	24	9	2227.39	0.0613232	0.9295	24.2975	6.00003	12374	0.00352131	0.0188494	24.1488	7.50954	10715.2	2399.76	0.223958	10344	11354	7206	9538	12587	13839	11071	11999	12009	11710	12189	13512	8880	7765	7939	9746	10730.5
1191	unknown1529	0.00164724	0.00965163	18	6	1768.83	0.0705439	0.9295	20	6.00001	15458	0.00116902	0.00913693	19	6.01667	13755.1	1363.24	0.0991078	14124	15134	13065	13534	15537	14594	14576	17125	12045	9450	11323	12298	13832	14209	13660	12933	13589.9
1192	unknown153	0.000572095	0.00471842	18	9	2459.67	0.227717	1	24.2975	6.00002	8807.25	0.0012957	0.00980837	21.1488	7.89842	7000.34	1932.02	0.27599	4204	4949	5130	4298	10035	9620	6531	9043	5826	7820	8653	7056	5112	5305	6990	7567	6758.69
1198	unknown1535	0.000987235	0.00692825	18	6	12105.1	0.10841	0.946907	20	6	90044.2	0.0010855	0.00880001	19	6.01667	78874.5	9385.44	0.118992	80237	88118	71004	76152	90368	88166	81030	100613	68346	52405	65115	69283	80158	83218	77363	72218	77737.1
1220	unknown1555	0.0419656	0.10784	24	12	680.06	0.417847	1	24.0327	6	4595.25	0.0884395	0.235368	24.0163	9.00205	4092.28	701.384	0.171392	3430	4903	3010	3126	5562	4102	4589	4128	3926	4455	4334	5612	3641	3213	3917	3537	4092.81
1226	unknown1560	0.0144977	0.0475569	18	3	308.299	0.329597	1	20	8.03e-05	2305	0.0303125	0.0998101	19	1.58337	1980.06	620.971	0.313612	2244	3234	1792	1950	2304	1606	1922	1807	1368	1129	1517	1954	2847	3032	2178	2482	2085.38
1236	unknown157	0.000987235	0.00692825	18	9	5633.7	0.0947117	0.9406	24.9858	6	17529.2	0.000960976	0.00823766	21.4929	7.95384	14767.7	4212.19	0.285229	10114	8721	9404	9808	20305	18668	14136	17008	12183	21455	17935	16991	12089	11838	12580	15561	14299.8
1270	unknown160	0.0210199	0.0632056	18	9	10825.5	0.843025	1	20	6	54050.5	0.0891869	0.237065	19	7.6	44586	8258.47	0.185226	35711	30644	29628	29802	59112	59531	45258	52301	31452	45275	45167	39072	47641	41026	42371	53410	42962.6
1272	unknown1601	0.0299489	0.0829149	24	12	806.809	0.678972	1	23.9024	12	5415.75	0.0995462	0.259347	23.9512	12	4706.11	1087.49	0.23108	3626	5957	3351	3491	6536	4545	5725	4167	4384	5010	4961	7308	4223	3998	3889	4099	4704.38
1279	unknown1608	0.00421867	0.0189687	18	6	5754.43	0.0337454	0.9295	20	6	55020.2	0.00140327	0.0103336	19	6.01667	49327.9	4886.78	0.0990673	47839	50750	48322	49705	57174	50698	54866	57343	41019	40651	43821	45767	49461	48823	46495	47038	48735.8
1282	unknown1610	0.0144977	0.0475569	18	6	1030.25	0.0561755	0.9295	20	5.99998	11911.8	0.0066074	0.0303716	19	6.01666	10916.3	788.01	0.0721866	11028	11676	10432	11198	12576	10989	12307	11775	8959	9410	9659	10191	11393	10848	10123	10569	10820.8
1296	unknown1623	0.00421867	0.0189687	18	9	1045.28	0.127231	0.963963	23.6461	6	6689.5	0.00457843	0.0227607	20.8231	7.8476	5754.23	1181.32	0.205295	4812	6029	3807	4012	7823	6621	6330	5984	5551	6117	5934	7141	5217	4232	4438	5415	5591.44
1300	unknown1627	0.0144977	0.0475569	18	9	987.828	0.446902	1	24.0327	6	6923.75	0.0391282	0.120758	21.0163	7.87756	6120.54	967.69	0.158105	5625	6109	4136	4327	8595	6382	6586	6132	6420	5737	5698	7832	5752	5263	5597	5720	5994.44
1301	unknown1628	0.0419656	0.10784	24	3	766.857	0.507737	1	23.6461	4.95e-05	7093.24	0.103313	0.265488	23.8231	1.48897	5571.31	1950.73	0.350138	7305	11063	4659	5346	7014	4895	5652	5235	4564	3137	3419	4821	6744	5279	4927	5183	5577.69
1302	unknown1629	0.0299489	0.0829149	18	9	667.155	0.73527	1	23.7736	6	4133	0.106046	0.271543	20.8868	7.85741	3516.51	798.9	0.227186	2419	4487	2355	2304	5867	3359	4330	2976	3366	3271	3084	5664	2845	2542	2993	2672	3408.38
1306	unknown1632	0.0299489	0.0829149	24	9	1249.63	0.254621	1	21.0501	6	9577.5	0.04481	0.135494	22.5251	7.43365	8129.67	1480.19	0.182072	7200	8547	6065	6654	11751	10164	8465	7930	7536	8304	8178	9607	7228	6628	6576	7766	8037.44
1311	unknown1637	0.0210199	0.0632056	18	9	809.637	0.344938	1	23.2718	6.00001	5367.25	0.0429717	0.130482	20.6359	7.81918	4617.65	896.266	0.194096	3485	5037	3175	3469	6661	5618	4736	4454	3899	5244	4555	5808	4018	3660	3506	4480	4487.81
1313	unknown1639	0.00267199	0.0134688	18	3	1075.51	0.118459	0.95517	22.7907	6.63e-05	4340.74	0.00286709	0.0163348	20.3953	1.69964	3066.2	1539.53	0.502099	3845	6338	3898	3282	3673	2317	2939	2307	2014	1384	1365	2417	4559	4374	4196	2703	3225.69
1333	unknown1657	0.0419656	0.10784	24	9	1004.27	0.149407	0.966499	24.0327	12	4789.25	0.0380712	0.118425	24.0163	10.499	4107.59	941.371	0.229178	3074	3506	3653	3405	5100	5073	4522	4074	3610	4916	4918	5713	3467	2984	3127	4590	4108.25
1334	unknown1658	0.0299489	0.0829149	18	6	4684.41	0.0551484	0.9295	20	6	39729.8	0.012232	0.04889	19	6.01667	34884.1	4214.3	0.120809	31317	37261	35380	34945	37941	38096	39667	43215	28528	27803	30536	34997	33772	31660	32116	32741	34373.4
1335	unknown1659	0.0065055	0.0255615	24	6	729.557	0.0407919	0.9295	20	6	7582.25	0.00245054	0.014882	22	6.05	6642.14	634.939	0.0955926	6251	6997	6891	6834	7602	7045	7643	8039	5518	5457	5775	6737	6610	6096	6099	6050	6602.75
1347	unknown167	0.00267199	0.0134688	18	9	4437.8	0.53446	1	25.7143	6.00001	16557.5	0.010784	0.0442185	21.8571	8.01429	13831.5	2781.77	0.201118	9939	10193	10148	9611	18336	18115	12541	17238	10664	16051	17147	13458	11258	11405	14132	16804	13565
1352	unknown1674	0.0210199	0.0632056	18	6	2315.6	0.0402147	0.9295	20	6.00002	27486.5	0.00682654	0.0310167	19	6.01667	25334	1651.58	0.065192	25038	27438	25027	26125	27217	27325	27055	28349	21398	23086	21311	24466	25155	25492	22842	24818	25133.9
1366	unknown1687	0.0299489	0.0829149	24	3	906.157	0.228824	1	24.4321	6.63e-05	11029	0.0410022	0.125381	24.2161	1.51354	10211.1	844.491	0.0827031	10732	11390	11709	10285	11155	9354	11394	10348	8958	8968	9225	10555	9668	9454	10342	9792	10208.1
1381	unknown170	0.0144977	0.0475569	18	9	10482	0.265913	1	25.8651	5.99999	36951.8	0.0252833	0.0864063	21.9326	8.02701	31884.8	7552.11	0.236856	23026	20518	19807	21487	43845	40649	29511	33802	24214	48338	37751	34307	29925	28157	27592	36039	31185.5
1403	unknown172	0.00164724	0.00965163	18	9	1837.42	0.2473	1	20	6.00002	7884.5	0.00358715	0.019105	19	7.60001	6298.54	1628.06	0.258481	4666	4606	3766	4809	8634	8903	6022	7979	4461	7455	6715	5659	5612	4933	4911	6525	5978.5
1412	unknown1728	0.0419656	0.10784	18	6	25025.9	0.667082	1	20	6.00002	88937.5	0.128096	0.316946	19	6.01668	63501.1	29248.8	0.460604	54435	16773	39517	44949	66122	102331	79209	108088	42265	54600	58912	35822	74805	54061	49843	77575	59956.7
1425	unknown174	0.000987235	0.00692825	18	9	3177.38	0.146224	0.966499	24.9858	6	11133.2	0.00142094	0.0104106	21.4929	7.95384	8956.5	2591.6	0.289354	5973	5346	5479	5917	12042	12038	9345	11108	7107	12945	10303	8872	8090	7772	7196	9164	8668.56
1436	unknown175	0.0299489	0.0829149	18	6	19892	0.922971	1	20	6.00002	80129	0.126833	0.314721	19	6.01667	63730.9	19437.3	0.304991	57285	40165	37484	47333	86069	90686	69314	74447	36232	65326	56377	49771	83414	60580	51006	76518	61375.4
1445	unknown1758	0.0210199	0.0632056	18	15	33185.9	0.736299	1	20	12	118092	0.0799909	0.216659	19	13.6167	88377.2	41341.4	0.467783	116272	66230	71573	138523	52549	69415	52166	72199	117698	117244	138251	99173	71671	78768	53432	92466	87976.9
1589	unknown1888	0.0210199	0.0632056	24	9	49089.1	0.902194	1	26.6465	6	153654	0.0941603	0.248028	25.3233	7.59913	114127	37323.8	0.327038	64378	319843	63361	62976	234162	151048	129672	99734	99278	160605	105063	142943	89044	37779	42451	57548	116243
1593	unknown1891	0.0210199	0.0632056	24	9	25785.5	0.892565	1	26.4865	6	79053.2	0.0933567	0.246529	25.2432	7.59229	56438.1	20393.2	0.361337	30316	164326	27391	31250	128264	79087	63915	44947	46620	79022	50106	72590	43670	14689	18697	25503	57524.6
1599	unknown1897	0.0210199	0.0632056	18	6	3219.46	0.999593	1	20	5.99999	12788	0.102172	0.263107	19	6.01666	10839.5	2237.34	0.206407	10542	6702	5969	10870	13331	15940	11135	10746	5881	6224	7405	7895	23886	8117	8848	15603	10568.4
1607	unknown1903	0.00164724	0.00965163	18	6	1006.21	0.605146	1	20	6.00001	4704.5	0.0078858	0.0345952	19	6.01667	3811.57	931.555	0.244402	3200	3009	2756	3951	5446	5069	4106	4197	2716	2457	4000	2554	3519	3434	4579	4186	3698.69
1608	unknown1904	0.0065055	0.0255615	18	6	2434.57	0.716922	1	20	6	7721.25	0.0296994	0.0984675	19	6.01667	5755.39	2187.96	0.380159	4453	6141	2507	3104	8707	8099	6219	7860	3344	3630	5803	3961	7249	4519	6308	5940	5490.25
1636	unknown193	0.00980952	0.0347873	18	9	5532.4	0.504958	1	20	6.00001	21949	0.0312444	0.101874	19	7.6	17278.7	4302.55	0.249008	12728	9025	12049	12094	24367	23318	19564	20547	11115	20730	16854	14009	17395	14676	15311	19145	16432.9
1646	unknown1939	0.0065055	0.0255615	18	9	1229.84	0.365681	1	25.7143	6	6427.25	0.0167503	0.0625269	21.8571	8.01429	5593.84	927.175	0.165749	3866	4694	4082	4595	6906	6442	5953	6408	5330	5221	7263	5598	5104	4486	5542	6590	5505
1656	unknown1948	0.000572095	0.00471842	18	9	2132.28	0.0490604	0.9295	24.7059	12	7643.75	0.000322237	0.00445769	21.3529	10.524	6383.57	1880.29	0.294552	4202	4351	3892	3940	8846	7226	6839	7116	5978	9344	8306	6947	5268	5068	4880	6603	6175.38
1658	unknown195	0.00267199	0.0134688	18	9	3685.26	0.374481	1	20	6	20981.5	0.00791197	0.0346719	19	7.6	17500	3189.46	0.182255	14550	12265	12576	15300	21808	22164	19348	20606	11882	19026	18571	16061	15738	15690	15141	19242	16873
1673	unknown1963	0.00267199	0.0134688	18	9	2462.85	0.55444	1	25.5652	5.99999	12567.8	0.0111328	0.0453054	21.7826	8.00177	10469.3	2038.67	0.194728	7584	8089	7467	7410	14796	13619	9901	11955	9109	10533	13252	9878	8382	8818	11233	12254	10267.5
1677	unknown1967	0.00267199	0.0134688	18	9	7939.04	0.170344	0.981551	25.4179	6.00003	30550.2	0.00395755	0.0204978	21.7089	7.98949	25571.5	6545.05	0.255951	18676	16532	15746	16623	36864	32368	26369	26600	20757	35520	29781	27805	23324	23460	20549	27479	24903.3
1678	unknown1968	0.000320124	0.00340574	18	9	2868.73	0.125839	0.963963	24.8451	6	10944	0.000447942	0.00529942	21.4225	7.94237	8872.12	2378.79	0.268119	6574	5627	5510	5835	12308	11131	9562	10775	7819	11881	9689	8789	8107	8169	6625	9214	8600.94
1679	unknown1969	0.0210199	0.0632056	18	6	16544.5	0.893698	1	20	5.99999	65175.5	0.0934513	0.246584	19	6.01666	51064.3	16381.5	0.320801	48729	34082	27732	34994	73012	72731	54836	60123	31074	45721	41693	38681	65863	57784	39757	58455	49079.2
1683	unknown1972	0.0065055	0.0255615	18	9	3523.51	0.498593	1	20	6	16087.8	0.0218329	0.0768096	19	7.6	12532.2	2950.97	0.235471	9522	7624	8615	8121	18023	16330	14591	15407	8144	13018	11919	10243	13400	12816	9937	13524	11952.1
1709	unknown1996	0.0065055	0.0255615	18	9	1070.21	0.221879	1	23.52	6.00002	7807.75	0.0108845	0.0445043	20.76	7.83797	6852	1112.23	0.162322	6008	6674	4504	5493	9026	8022	6677	7506	6347	7617	7537	7031	5989	6235	5486	6985	6696.06
1710	unknown1997	4.22e-05	0.00116331	18	9	2955.18	0.13763	0.965964	24.0327	6.00002	11156	7.58e-05	0.0022946	21.0163	7.87756	8751.42	2618.53	0.299212	5708	6154	5163	5583	13964	11280	9273	10107	7844	11194	9455	8470	7376	7934	6652	8406	8410.19
1726	unknown201	0.00421867	0.0189687	18	9	2478.06	0.00819041	0.9295	24.0327	6	4978	0.000389513	0.00488514	21.0163	7.87756	3424.85	2488.56	0.726618	1405	1165	1257	985	4467	4964	4721	5760	4957	4640	5474	4653	1200	1217	1170	1574	3100.56
1742	unknown2024	0.0144977	0.0475569	24	9	4443.81	0.718392	1	23.0287	6.00001	23465.2	0.0579546	0.165421	23.5144	7.47221	16230.7	5167.1	0.318353	10250	35973	8920	10689	37520	25663	16476	14202	12484	17611	14627	15465	13854	8284	6406	9556	16123.8
1755	unknown2036	0.0419656	0.10784	24	12	3229.36	0.323868	1	22.3291	12	15033.8	0.0720111	0.198225	23.1646	12.0156	11406.4	4136.51	0.362647	7597	7751	9425	8606	8052	12205	8640	18320	14574	12624	18130	14807	6499	10048	9505	13960	11296.4
1758	unknown2039	0.0419656	0.10784	18	9	1189.71	0.277672	1	23.0287	6.00002	5952.5	0.0635328	0.17888	20.5144	7.80105	4766.2	1305.29	0.273864	3127	5801	3228	3169	7760	5877	4881	5292	3922	6484	5739	3984	3656	2679	3409	4132	4571.25
1759	unknown204	0.00421867	0.0189687	18	9	2655.01	0.00908361	0.9295	24.0327	6	6299.75	0.000428025	0.00517695	21.0163	7.87756	4570.34	2697.11	0.590133	2420	2043	2268	1976	5493	6314	6086	7306	6170	5778	6857	5769	2236	2060	2133	2593	4218.88
1760	unknown2040	0.0419656	0.10784	18	9	12871.8	0.360238	1	23.52	5.99999	68779.2	0.0784889	0.213077	20.76	7.83795	55600.1	14876.5	0.267562	36538	74407	36969	35020	92931	66295	54957	60934	49633	74457	66443	47523	42154	32256	38934	46779	53514.4
1792	unknown207	0.00164724	0.00965163	18	9	2227.21	0.41049	1	20	6	11868	0.00561163	0.0267603	19	7.6	9995.98	1790.52	0.179124	8061	6909	7067	8654	11504	12729	11413	11826	7348	11002	10629	8895	9048	9353	8962	10904	9644
1802	unknown2079	0.000987235	0.00692825	24	12	8245.93	0.0631146	0.9295	23.2718	12	25772.2	0.000665672	0.00655947	23.6359	12.0029	17121.8	11190.5	0.653584	13171	11166	7003	8404	21331	26132	12271	21660	32300	17096	30245	23448	10607	12009	11612	13381	16989.8
1803	unknown208	0.0419656	0.10784	18	9	1664.88	0.485582	1	20	5.99999	8946	0.0997146	0.259369	19	7.59999	7575.68	1646.89	0.217392	5773	5652	4530	6825	9873	10916	6827	8168	5770	9961	7962	7229	6529	5651	6083	8282	7251.94
1814	unknown209	0.00267199	0.0134688	18	9	4182.89	0.187106	0.994309	24.9858	6	15176.8	0.00430004	0.0217006	21.4929	7.95384	12301.1	3781.95	0.307449	7930	6898	6971	8562	17545	16928	12850	13384	9710	19926	13497	12587	10409	9873	10141	12883	11880.9
1824	unknown2099	0.0210199	0.0632056	24	18	1586.75	0.252475	1	21.0501	17.9999	7164.25	0.0331088	0.106827	22.5251	18.0775	5823.93	1152.88	0.197957	5360	6376	3933	6901	3868	3534	4552	3923	4704	6172	8068	8175	6903	6645	5314	9795	5888.94
1832	unknown2105	0.0210199	0.0632056	18	6	4098.74	0.411186	1	20	6	24833.2	0.0497063	0.147014	19	6.01667	10362.4	14719.8	1.42049	3717	6708	585	1348	43565	43406	6980	5382	2931	1028	961	680	8049	8082	1228	2609	8578.69
1839	unknown2111	0.0065055	0.0255615	18	15	953.003	0.397506	1	20	12	7018.25	0.0179923	0.0659109	19	13.6167	6081.09	1300.3	0.213827	6810	6293	5844	6143	5045	4603	4822	5967	7125	6969	6116	7863	5071	5284	6535	6606	6068.5
1871	unknown2140	0.00164724	0.00965163	18	3	1698.65	0.231432	1	20	6.63e-05	6593	0.00338228	0.0183986	19	1.58336	5585.73	1877.39	0.336104	7759	6159	5009	7445	5808	7364	4544	6154	3444	4049	4523	3226	8398	7991	5108	7485	5904.12
1891	unknown2159	0.0210199	0.0632056	18	6	3137.26	0.972314	1	20	6	14764.2	0.0999488	0.259762	19	6.01667	12168.4	3261	0.267989	11959	4771	7888	10194	14931	14422	13223	16481	11524	8904	12094	10046	13401	14634	10885	13015	11773.2
1900	unknown2167	0.000987235	0.00692825	18	6	3004.14	0.15785	0.97563	20	6	7690.75	0.00152199	0.0108343	19	6.01667	3584.05	4242.58	1.18374	2586	455	461	1319	6717	9388	4686	9972	612	662	465	266	5661	3226	893	1750	3069.94
1901	unknown2168	0.000320124	0.00340574	18	6	4647.46	0.146572	0.966499	20	6	11720.8	0.000514588	0.0057427	19	6.01667	5344.18	6578.46	1.23096	3975	571	548	1663	10307	14739	6962	14875	776	849	526	249	8039	5005	1111	2557	4547
1902	unknown2169	0.000320124	0.00340574	18	6	21358.9	0.208526	1	20	6	55722.5	0.000708562	0.00684837	19	6.01667	25976.3	30779.6	1.18491	20356	2851	2403	8037	49987	72485	31709	68709	3845	3239	2224	1230	43905	28022	5078	11862	22246.4
1905	unknown2171	0.00267199	0.0134688	18	6	21136.7	0.694928	1	20	6.00002	60755	0.0135343	0.0529391	19	6.01668	41802.4	22088.7	0.528409	33983	4881	21341	28790	62212	68917	44031	67860	32196	25266	32572	25627	49741	48615	37078	42900	39125.6
1906	unknown2172	0.0065055	0.0255615	18	6	1900.7	0.608788	1	20	6	8363.5	0.0258674	0.0878476	19	6.01667	6528.17	2034.02	0.311576	6177	4158	4154	5358	7878	8637	6808	10131	5134	4765	5956	4247	7217	6891	5955	7041	6281.69
1911	unknown2177	0.000987235	0.00692825	24	12	2997.07	0.0290832	0.9295	23.52	12	10160	0.000328987	0.00445769	23.76	12.0012	7306.78	3791.17	0.518857	5537	5795	3812	4472	8976	10529	6707	8008	9917	10225	11230	9268	6009	5335	3774	6841	7277.19
1914	unknown218	0.0210199	0.0632056	18	6	3381.21	0.939728	1	20	6	9495.25	0.0972725	0.254342	19	6.01667	6637.08	3260.29	0.491224	7011	259	2961	5010	10446	11114	7585	8836	3495	5089	4043	2994	11283	7144	4664	7938	6242
1918	unknown2183	0.0210199	0.0632056	18	15	756.604	0.333566	1	20	12	7055.5	0.04179	0.127251	19	13.6167	6170.89	1196.01	0.193814	6648	6769	5190	6200	4558	5845	4114	6139	6967	6909	7545	6801	5635	6604	5459	7166	6159.31
1921	unknown2186	2.89e-06	0.00035704	18	3	1302.84	0.0269161	0.9295	24.4321	6.63e-05	4369.98	1.35e-06	0.000589942	21.2161	1.76803	2870.68	3226.82	1.12406	4580	3392	4357	5151	1272	1199	1042	1043	932	846	986	841	5169	8870	5274	4578	3095.75
1922	unknown2187	0.00421867	0.0189687	18	6	7005.31	0.742025	1	20	6	27976.5	0.0211819	0.0753019	19	6.01666	20758.7	8255.73	0.3977	16853	11093	11664	15186	25280	30639	21384	34603	15140	13126	17868	13243	24481	23509	19633	22430	19758.2
1923	unknown2188	0.00421867	0.0189687	18	6	65031.6	0.895584	1	20	6.00001	186935	0.0248548	0.0852783	19	6.01667	131720	66171.1	0.502363	104758	15335	56441	95171	194146	215011	149079	189503	98204	78826	99795	88540	181827	171814	102589	138177	123701
1932	unknown2196	0.000572095	0.00471842	18	6	6460.66	0.472643	1	20	6	15832	0.00249187	0.0150695	19	6.01667	10344.8	6144.43	0.593961	6803	2901	5471	6602	15906	17089	12237	18096	5791	5858	5990	5873	12539	12207	9718	10523	9600.25
1934	unknown2198	0.00267199	0.0134688	24	21	1395.12	0.0205971	0.9295	24.4321	6.63e-05	2756.99	0.000594797	0.00623491	24.2161	22.7026	2093.27	1562.15	0.746272	3089	2287	2553	3099	1127	1108	990	1002	978	1046	1143	1028	2849	4681	3292	2992	2079
1939	unknown2201	0.0210199	0.0632056	18	6	1234.96	0.81494	1	20	6	2477.75	0.0867962	0.232522	19	6.01667	1850.09	628.914	0.339938	2746	734	695	1535	2484	2904	1936	2587	578	741	611	401	3466	3162	1406	2396	1773.88
1941	unknown2203	0.000320124	0.00340574	18	6	15018.2	0.150557	0.966499	20	6.00001	34740.2	0.000527286	0.00582521	19	6.01667	17047.7	18140.9	1.06413	14042	3383	2677	8456	32814	37351	23166	45630	3666	3185	3251	1468	25827	16044	4993	11637	14849.4
1942	unknown2204	0.000320124	0.00340574	18	6	4130.56	0.136219	0.965964	20	6	8639.75	0.000481433	0.005516	19	6.01667	4543.23	4110.99	0.904861	5420	982	1027	2588	8239	10341	6672	9307	1108	892	1114	503	5901	5057	1765	3805	4045.06
1944	unknown2206	0.000171384	0.00241724	18	6	4238.04	0.157038	0.97563	20	6	10176	0.000310125	0.00441767	19	6.01667	5123.56	5232.41	1.02124	3382	1227	1184	2726	9597	11066	6953	13088	1366	1172	1490	737	7984	4544	1818	3498	4489.5
1950	unknown2211	0.00980952	0.0347873	18	15	6625.06	0.124887	0.963963	20	12	31063	0.00943894	0.0398082	19	13.6167	22167.3	9842.42	0.444007	18612	22493	15392	22557	14293	13370	16915	14719	20601	34342	38213	31096	21560	18034	18990	31964	22071.9
1956	unknown2217	0.00164724	0.00965163	18	6	2744.63	0.703085	1	20	6.00001	7071	0.00898833	0.0381564	19	6.01667	4503.45	2770.27	0.615143	3843	1780	1759	2541	7603	9039	5623	6019	1836	2097	2058	1241	8404	5920	2658	4263	4167.75
1966	unknown2226	0.00980952	0.0347873	18	6	1059.25	0.779381	1	20	6	3847.5	0.0449062	0.13569	19	6.01667	2968.75	984.558	0.331641	2880	1744	1521	2555	3931	4318	3612	3529	2035	2509	2404	1890	4114	3246	2290	3013	2849.44
1983	unknown2241	0.0299489	0.0829149	18	15	9626.02	0.836175	1	20	12	21992	0.117379	0.295839	19	13.6167	18025.7	10299.4	0.571374	36293	15248	16217	32282	6012	8671	2716	14830	25183	15015	26052	21718	11157	21080	13065	21276	17925.9
1997	unknown2254	0.0419656	0.10784	18	9	20892	0.316397	1	27.4766	6.00002	121899	0.0706599	0.195375	22.7383	8.16724	109904	14808	0.134736	96102	90865	68214	83197	134374	122024	118319	112878	101415	113483	128940	122264	118307	110637	94335	129550	109056
1998	unknown2255	0.000171384	0.00241724	18	15	6614.1	0.125338	0.963963	20	12	17463	0.000252365	0.00401742	19	13.6167	12239	7543.38	0.61634	15641	10422	10936	16449	5685	6175	4290	8182	18635	17114	17268	16835	11955	14255	6837	13976	12165.9
2007	unknown2263	0.000572095	0.00471842	18	15	3297.59	0.32147	1	20	12	8139.5	0.00176574	0.0118354	19	13.6167	5562.64	3963.9	0.712593	7894	6503	4622	7854	2234	2834	2019	3181	8969	7637	9159	6793	4626	5941	2830	5292	5524.25
2021	unknown2276	0.00164724	0.00965163	18	6	2668.27	0.46782	1	20	5.99997	9314	0.00629462	0.0292757	19	6.01665	7012.37	2329.69	0.332226	7143	4965	4216	6516	9645	10886	8632	8093	4474	4589	5086	3547	10360	7638	5484	6407	6730.06
2022	unknown2277	0.000171384	0.00241724	18	15	3397.47	0.166661	0.980144	20	12	7750.75	0.00032743	0.00445769	19	13.6167	4901.02	3932.37	0.802357	7206	4021	3482	6970	1512	2465	1470	2276	8089	7727	9082	6105	3878	5369	2800	5355	4862.94
2030	unknown2284	0.0210199	0.0632056	18	12	1213.04	0.307261	1	20	12	9710.25	0.039025	0.120526	19	12.0333	8083.3	1888.09	0.233579	7981	7506	4732	7754	7633	9124	6616	9146	9829	8807	11024	9181	6853	6655	4668	8255	7860.25
2032	unknown2286	0.0419656	0.10784	18	15	34316.6	0.854565	1	20	12	121712	0.155215	0.363767	19	13.6167	84739.8	48106.7	0.567699	94674	34072	60019	172793	38536	54630	48888	69445	96396	118680	179913	91858	76868	66959	64275	80377	84273.9
2036	unknown229	0.0065055	0.0255615	18	9	2441.29	0.545086	1	20	6	10365.8	0.0235526	0.081521	19	7.6	8096.81	2116.22	0.261365	5880	3283	5893	5434	10365	11996	9199	9903	5393	8880	8303	6742	7938	7137	7342	9205	7680.81
2039	unknown2292	0.0419656	0.10784	18	15	12028.4	0.863717	1	20	12	38710.5	0.156491	0.365877	19	13.6167	25884.6	16643.1	0.642975	29811	12869	24136	49961	11836	14996	14134	25160	29557	45150	50962	29173	19966	18826	13900	21137	25723.4
2040	unknown2293	0.0419656	0.10784	18	15	1221.35	0.9031	1	20	12	5596.75	0.161936	0.376576	19	13.6167	4689.58	1396.35	0.297755	5842	4164	4151	6569	3334	3943	3259	4392	5884	5798	6078	4627	4179	4522	3315	4760	4676.06
2044	unknown2297	0.00267199	0.0134688	18	12	1708.19	0.0220149	0.9295	23.9024	12	9574.5	0.000631822	0.00640898	20.9512	12.2429	7411.93	3198.19	0.431492	5668	5954	3469	5114	9752	10593	7317	8586	8887	9010	10970	9431	5145	4983	3996	5655	7158.12
2072	unknown2321	0.0419656	0.10784	18	3	489.495	0.714622	1	20	6.63e-05	1813	0.13516	0.329158	19	1.58336	1664.3	736.404	0.442471	2160	1625	1538	1929	3072	932	1550	1652	643	1692	933	794	2129	3045	2104	2829	1789.19
2085	unknown2333	0.00980952	0.0347873	18	6	2583.77	0.788703	1	20	5.99997	6414.75	0.0453513	0.136654	19	6.01665	4370.23	2145.9	0.491026	5050	1660	1489	3307	6546	7784	4678	6651	1911	1764	2017	866	8243	5689	2795	5313	4110.19
2090	unknown2338	0.00421867	0.0189687	18	6	2532.5	0.126035	0.963963	20	6	10589.2	0.0045404	0.0225976	19	6.01667	6259.84	4582.25	0.732007	4335	3161	2972	3431	9986	14075	6591	11705	3671	4015	3891	3128	5834	5695	3830	4953	5704.56
2110	unknown2356	0.0299489	0.0829149	24	9	11857.8	0.553716	1	22.1053	6	37669.5	0.0845639	0.227288	23.0526	7.45094	20774.6	15923.2	0.766475	7892	32020	6414	6343	77845	38563	20640	13630	11081	43137	14213	23173	12767	3566	2904	7953	20133.8
2169	unknown2409	0.00980952	0.0347873	18	6	197.283	0.714109	1	20	6	643.25	0.0417581	0.127243	19	6.01667	471.475	191.14	0.405409	451	226	279	324	627	787	601	558	336	369	291	273	638	592	384	437	448.312
2194	unknown2431	0.00980952	0.0347873	18	15	3678.72	0.27388	1	20	12	14989.5	0.0185901	0.067871	19	13.6167	11554.1	4530.17	0.392082	15019	10494	9537	11485	7865	8457	6391	8923	17927	13845	18248	9938	10691	13248	9212	12884	11510.2
2195	unknown2432	0.0210199	0.0632056	24	12	6403.03	0.50732	1	25.1282	12	45285.5	0.0590871	0.168431	24.5641	12.0063	39849	8353.67	0.209633	31298	35193	24831	34657	62803	40139	35716	41612	45301	44259	52846	38736	38180	34103	32908	47495	40004.8
2229	unknown2463	0.00421867	0.0189687	18	15	1149.4	0.0963706	0.945467	20	12	5453.25	0.00358086	0.019095	19	13.6167	3956.35	1610.56	0.407082	4360	2824	3125	4463	2786	3389	2575	3290	5869	5316	6082	4546	3412	4001	3049	3965	3940.75
2240	unknown2473	0.0299489	0.0829149	24	15	2322.67	0.33491	1	23.3952	12	16457.8	0.0561907	0.161277	23.6976	13.4831	13831	2979.8	0.215444	12595	12160	8258	12423	13327	11087	10133	17088	15461	15527	17052	17791	12681	13970	12833	18660	13815.4
2241	unknown2474	0.0419656	0.10784	24	15	1539.73	0.238223	1	21.995	12	8936	0.0560386	0.161013	22.9975	13.4602	7278.32	1913.23	0.262866	6367	6837	4637	5873	6276	5521	5407	8998	8626	8299	9118	9701	6645	6942	6720	9993	7247.5
2298	unknown2525	0.0419656	0.10784	18	6	1652.33	0.806438	1	20	6	8044.25	0.148435	0.35237	19	6.01667	6532.34	1853.35	0.283719	5612	4092	3540	5559	9140	8725	7756	6556	4509	5546	6553	6608	7273	6933	6454	6068	6307.75
2299	unknown2526	0.000320124	0.00340574	18	15	5723.68	0.108018	0.946907	20	12	24683	0.000389785	0.00488514	19	13.6167	18510.2	8114.93	0.438403	21102	15923	15243	22508	10996	14426	8566	14317	28340	22497	26229	21666	17288	20476	14757	20572	18431.6
2331	unknown2555	0.0299489	0.0829149	24	12	1752.56	0.307193	1	24.0327	12	8761.25	0.0523352	0.152806	24.0163	12	7210.14	2191.08	0.303889	6057	7696	3794	4886	8712	10536	6601	6888	9137	8205	10401	7302	6217	6239	4457	8253	7211.31
2340	unknown2563	0.0419656	0.10784	24	12	2244.36	0.254687	1	21.5648	12	10843	0.0591974	0.168635	22.7824	12.0344	8534.47	2901.17	0.339936	7550	9040	4997	5788	10242	11450	6783	7729	10788	11294	11826	9464	6843	6379	4868	9746	8424.19
2347	unknown257	0.00267199	0.0134688	18	6	3457.05	0.284981	1	20	5.99999	9637	0.00622901	0.029127	19	6.01666	5783.75	4253.49	0.735421	4116	301	2687	3576	10989	12124	7039	8396	3038	4178	3438	2754	6733	5302	4111	5511	5268.31
2355	unknown2577	0.000572095	0.00471842	24	12	7386.44	0.0118269	0.9295	23.7736	12	18152.8	8.73e-05	0.00242333	23.8868	12.0003	11893.9	9045.89	0.760548	7257	8331	4425	6673	17172	17420	13671	14814	17359	17795	19977	17480	7179	6658	4776	8781	11860.5
2356	unknown2578	0.000171384	0.00241724	18	12	3037.02	0.0363132	0.9295	20	12	12983	8.08e-05	0.00235269	19	12.0333	9093.51	4615.6	0.507571	7446	9138	4499	5341	9342	9637	8183	10335	13072	12358	13639	12863	4734	5081	5368	5736	8548.25
2365	unknown2586	0.0144977	0.0475569	18	0	2969.14	0.454094	1	20	17.9999	22938.5	0.0396528	0.121944	19	18.05	21715.3	2404.7	0.110738	24980	27345	22849	24840	21538	21774	16299	17442	18547	21984	23596	22856	23437	22106	21203	25008	22237.8
2369	unknown259	0.000572095	0.00471842	18	6	4261.03	0.163026	0.980144	20	6	10890	0.00095878	0.00823714	19	6.01667	6018.42	5237.42	0.870231	3987	338	2617	3346	12862	13478	7348	9872	2731	3752	3088	2184	6634	4882	3888	5133	5383.75
2390	unknown2608	0.0299489	0.0829149	18	6	2053.79	0.613819	1	20	5.99999	13033.5	0.0918484	0.243244	19	6.01666	9925.24	3491.61	0.351791	8156	7639	6402	6590	12829	17763	9055	12487	8445	7764	8521	7003	10682	10856	9417	8425	9502.12
2392	unknown261	0.0299489	0.0829149	24	12	3308.73	0.0671888	0.9295	20	12	23048.8	0.0145052	0.0560969	22	12.1	16105.8	6982.78	0.433556	14007	11395	12925	9998	12653	14362	12710	16142	21818	24947	27832	17598	9489	11642	16423	17161	15693.9
2395	unknown2612	0.0419656	0.10784	24	0	1380.27	0.397323	1	24.0327	6.63e-05	8468.24	0.0849354	0.228145	24.0163	3.31e-05	6899.54	1954.85	0.28333	9338	11693	5512	7330	6963	7447	4740	5879	5294	4772	5413	5992	7568	8860	6067	7508	6898.5
2400	unknown2617	0.000987235	0.00692825	18	9	1399.72	0.285582	1	20	6	5864.25	0.00258644	0.0154306	19	7.6	4551.27	1238.5	0.272122	2747	3202	2319	4075	5338	6394	6022	5703	2761	4448	4759	4782	3895	4721	3208	4551	4307.81
2412	unknown2628	7.77e-06	0.000473861	18	6	19770.7	0.0928446	0.93685	20	6	34835	1.09e-05	0.000985394	19	6.01667	17037.2	18737.9	1.09982	7279	6035	4726	4164	36031	36560	35662	31087	2975	3279	5340	4455	22885	14486	11405	9896	14766.6
2413	unknown2629	7.77e-06	0.000473861	18	6	5378.25	0.0890193	0.935067	20	6	9741.5	1.05e-05	0.000967577	19	6.01667	4819.96	5172.78	1.0732	2021	2029	1387	1269	9027	9908	11280	8751	935	1087	1578	1327	5985	4241	3205	3060	4193.12
2416	unknown2631	0.0299489	0.0829149	18	3	349.134	0.288865	1	23.9024	6.63e-05	3269.99	0.0497449	0.147028	20.9512	1.74596	2513.98	981.8	0.390536	3442	5098	1934	2606	2361	2303	1759	1632	1741	1487	2040	2104	3697	3816	2253	3209	2592.62
2419	unknown2634	0.0144977	0.0475569	24	0	2601.09	0.105785	0.946907	23.9024	6.63e-05	8552.24	0.0114718	0.0463366	23.9512	3.32e-05	7129.95	2992.6	0.419722	9477	11251	5934	7547	6529	6975	4909	4981	5155	4505	5206	5494	9202	10544	7304	9143	7134.75
2423	unknown2638	0.00421867	0.0189687	24	12	10669.5	0.0507526	0.9295	22.9091	12	39529.5	0.00202312	0.0129978	23.4545	12.0065	29189.6	13088.4	0.448394	24045	23155	15942	20166	36155	40328	22803	30380	39113	41498	43033	34474	22355	21550	19136	29222	28959.7
2425	unknown264	0.0210199	0.0632056	24	12	873.1	0.315056	1	24.4321	12	3792	0.0398491	0.12246	24.2161	12.001	3127.46	1025.81	0.327999	2792	1713	943	3675	2973	4016	3767	4130	2893	4317	4027	3931	2551	2097	2800	3531	3134.75
2427	unknown2641	0.000171384	0.00241724	24	12	5347.5	0.00787006	0.9295	23.7736	12	14561	1.96e-05	0.00129551	23.8868	12.0003	9955.28	6741.35	0.677163	6333	6420	4977	6040	12863	13168	12175	13704	14843	13747	15078	14576	6286	5754	6173	6749	9930.38
2431	unknown2645	0.0299489	0.0829149	24	9	4494.37	0.324471	1	21.995	6	24405.8	0.054747	0.158142	22.9975	7.44877	19498.9	5004.14	0.256636	15311	12124	16926	21223	17499	28938	21671	29515	16909	17447	24810	23278	12981	15822	14890	19231	19285.9
2452	unknown2664	0.00164724	0.00965163	24	12	2044.95	0.0495027	0.9295	20	12	8544.25	0.000849219	0.00766885	22	12.1	5973.78	2941.4	0.492385	4339	6063	2877	3519	6574	6439	4884	5606	7857	8966	9282	8072	3898	4047	3873	6508	5800.25
2471	unknown2681	0.0299489	0.0829149	24	12	1775.72	0.146371	0.966499	23.6461	12	8068.75	0.0281864	0.0942448	23.8231	12.0007	6611.3	2015	0.304782	5607	7262	3602	5093	8335	8077	5302	7771	7651	8315	8115	8194	5753	5436	4552	6530	6599.69
2474	unknown2684	0.0065055	0.0255615	24	15	478.711	0.0495264	0.9295	20	12	5695	0.00291275	0.0165297	22	13.475	5066.08	797.624	0.157444	4628	4911	4434	5153	4677	4742	4613	4595	6071	5904	5419	5386	4899	5360	4749	5173	5044.62
2519	unknown2724	0.0210199	0.0632056	18	15	23274.8	0.226936	1	20	12	224232	0.0302685	0.0998101	19	13.6167	199238	28346.5	0.142274	219016	201993	154269	193966	193150	188590	156085	168242	213013	221162	240906	221849	191216	200895	193267	225804	198964
2525	unknown273	0.0419656	0.10784	24	9	26901.5	0.347877	1	22.6735	5.99999	197346	0.0763054	0.208062	23.3368	7.46339	168962	27841.2	0.164777	146814	141813	159431	173596	181322	200362	199968	207731	136836	227911	175151	158984	131519	126828	138571	183982	168176
2537	unknown2740	0.0419656	0.10784	18	6	217.789	0.361474	1	20	6.00001	901.5	0.0787063	0.213533	19	6.01667	695.118	208.307	0.299672	678	460	767	459	837	975	847	947	574	574	627	342	468	866	727	570	669.875
2580	unknown278	0.00421867	0.0189687	18	6	2332.04	0.403752	1	20	6	6386.25	0.0125621	0.0499028	19	6.01667	3839.76	2763.53	0.719715	3267	116	1710	2530	7333	7828	4853	5531	1597	2627	2042	1602	5885	3568	1986	3603	3504.88
2593	unknown2791	0.0144977	0.0475569	18	0	1281.28	0.222803	1	24.5682	17.9999	8305.24	0.0217557	0.0767304	21.2841	18.439	7195.22	1976.93	0.274756	9847	13066	6414	8349	6050	7270	4789	5703	5835	5402	6199	6715	8464	9439	7152	8166	7428.75
2595	unknown2793	0.000320124	0.00340574	18	12	1691.4	0.0904395	0.935067	20	12	7949.5	0.000331496	0.00445769	19	12.0333	5825.06	2421	0.415618	4635	5578	2501	4594	6895	6259	4938	5240	6139	7550	8218	9891	4161	4498	3409	4119	5539.06
2596	unknown2794	0.00980952	0.0347873	18	9	5380.02	0.042069	0.9295	24.0327	12	14375.2	0.0036286	0.0192547	21.0163	10.501	11056.1	5380.81	0.486683	6708	9102	3976	5304	16396	18640	9056	13249	13271	14995	16008	13227	7466	5516	4438	8840	10387
2607	unknown2803	0.0299489	0.0829149	24	12	1900	0.210718	1	20	12	9910.5	0.038278	0.118643	22	12.1	7460.76	2687.91	0.360273	6508	7704	4114	4950	8117	8879	5242	6400	9746	10419	10829	8648	6861	5068	4218	9132	7302.19
2634	unknown2828	0.00164724	0.00965163	24	12	5218.45	0.0121216	0.9295	24.0327	12	13791.2	0.000236041	0.0038842	24.0163	12	9732.41	6362.82	0.653777	5723	5850	5181	6311	12162	12020	13242	15252	11435	15996	14144	13590	5130	6104	6678	6955	9735.81
2663	unknown2854	0.0210199	0.0632056	24	12	3996.21	0.247136	1	23.6461	12	27722.8	0.0325198	0.105397	23.8231	12.0007	24076.3	5069.88	0.210576	23253	23711	15647	21406	27776	29526	22420	24379	24964	29955	29978	25994	21590	21061	17224	25869	24047.1
2668	unknown2859	0.00164724	0.00965163	24	12	1236.2	0.0919453	0.93676	23.2718	12	6986.25	0.00148354	0.0106876	23.6359	12.0029	5625.49	1657.52	0.294645	4701	4785	3825	4329	6484	7099	4909	5511	6421	7689	7644	6191	5007	4824	3931	6345	5605.94
2670	unknown2860	0.0419656	0.10784	24	12	2403.81	0.187525	0.994309	23.9024	12	14051	0.0459958	0.138019	23.9512	12	12091.4	2916.59	0.241212	11162	12421	7678	9955	14476	15365	11525	12546	13135	14609	15153	13307	10895	9503	8311	13347	12086.8
2672	unknown2862	0.0299489	0.0829149	24	12	769.509	0.209626	1	23.52	12	6056.75	0.0381123	0.118468	23.76	12.0012	5317.15	980.056	0.18432	5147	5157	3698	4659	6140	6229	4920	5288	5491	6354	6437	5945	5122	4649	4080	5636	5309.5
2674	unknown2864	0.00421867	0.0189687	18	0	955.655	0.113699	0.946907	24.1644	17.9999	6708.74	0.00414542	0.0211173	21.0822	18.3931	5902.06	1243.19	0.210637	7611	8598	5707	6930	5192	5751	4646	4583	4847	5273	5336	5655	7345	7151	5528	6811	6060.25
2688	unknown2877	0.0144977	0.0475569	24	12	4186.6	0.140047	0.965964	23.6461	12	24921.2	0.0146177	0.0564122	23.8231	12.0007	21333.7	4928.66	0.231028	19109	21957	14097	18003	25126	25100	20833	21609	22417	26117	26380	24771	18899	18305	15186	22975	21305.2
2707	unknown2894	0.0210199	0.0632056	24	12	1988.21	0.198937	1	24.1644	12	13740	0.0270847	0.0912656	24.0822	12.0001	12074.6	2401.58	0.198896	10720	12663	7754	9909	14284	14854	11188	12567	13397	14445	14157	12961	11471	11090	9098	12739	12081.1
2711	unknown2898	0.0419656	0.10784	24	12	1186.53	0.182682	0.993547	24.0327	12	6437.5	0.0450086	0.13581	24.0163	12	5610.71	1354.91	0.241487	4862	6133	3361	4373	7512	7043	5234	5927	6716	6551	6151	6332	4665	5273	3991	5659	5611.44
2712	unknown2899	0.0299489	0.0829149	24	12	1863.93	0.216519	1	24.1644	12	11435	0.0391557	0.120758	24.0822	12.0001	9930.13	2294.21	0.231035	8390	10577	5956	8027	12147	12337	9664	10522	10591	12052	11677	11420	9533	8822	6327	10939	9936.31
2717	unknown2902	0.0210199	0.0632056	18	9	1990.51	0.232986	1	23.9024	5.99999	16099.5	0.0309466	0.101131	20.9512	7.86739	14323.5	2498.92	0.174463	12811	15260	8564	11151	17320	17974	13608	15496	14979	16429	15864	14821	13410	11447	10031	14699	13991.5
2737	unknown2920	0.0144977	0.0475569	24	12	1173.8	0.176991	0.990633	24.0327	12	6258	0.017873	0.0655848	24.0163	12	5396.16	1341.37	0.248579	4521	5789	3547	4244	6897	6973	5208	5396	5461	7066	6185	6320	5238	4795	3613	5097	5396.88
2741	unknown2924	0.0419656	0.10784	18	12	1575.08	0.442655	1	23.7736	12	22336.5	0.092619	0.244835	20.8868	12.2337	20113.7	3141.6	0.156192	17726	22869	14652	17704	23336	22821	19586	19117	19930	25050	20546	23820	19642	17108	14623	19221	19859.4
2757	unknown2939	0.0144977	0.0475569	24	12	2263.8	0.226143	1	20	12	16228.5	0.0220331	0.0773748	22	12.1	13473.5	3373.78	0.250402	12029	15983	8897	10293	14790	14607	12741	12422	16913	17070	14594	16337	12455	11622	9197	12441	13274.4
2772	unknown2952	0.0210199	0.0632056	18	12	1043.16	0.30186	1	23.7736	12	8351.25	0.0384516	0.11903	20.8868	12.2337	6962.03	1981.68	0.284641	4803	7952	4142	5702	8968	8471	7879	5757	5824	10064	8121	9396	6716	5593	4134	5304	6801.62
2778	unknown2958	0.0419656	0.10784	24	12	4864.89	0.151227	0.966499	24.1644	12	24045.5	0.038458	0.11903	24.0822	12.0001	20465.3	5714.62	0.279235	16171	21515	11641	16228	27520	27502	19932	20269	21492	25289	25044	24357	19006	17873	13319	20533	20480.7
2788	unknown2967	0.00980952	0.0347873	24	12	13320.1	0.114661	0.946907	23.2718	12	53311	0.00876217	0.0373795	23.6359	12.0029	40996.9	16630.2	0.405645	29243	44104	24100	31744	54697	52516	42843	34900	41495	63290	50814	57645	34709	31410	25831	33471	40800.8
2794	unknown2972	0.00980952	0.0347873	24	12	5574.12	0.104258	0.946907	23.9024	12	26905.8	0.00806447	0.0351653	23.9512	12.0001	22234.7	6914.7	0.310987	17414	24306	15164	17840	27904	29736	22307	21275	23873	30384	24895	28471	19496	18437	14880	19197	22223.7
2797	unknown2975	0.00980952	0.0347873	18	12	877.166	0.190872	0.994309	23.1496	12	7609	0.0136318	0.0532724	20.5748	12.1909	6602.33	1332.77	0.201863	5819	6152	4640	6429	7238	7299	7163	6073	6278	8509	7797	7852	6055	5526	4365	6557	6484.5
2830	unknown3003	0.0144977	0.0475569	18	9	1157.18	0.172104	0.981551	24.0327	6	6431.75	0.0174494	0.0646884	21.0163	7.87756	5546.46	1214.57	0.218981	4654	5552	3405	3769	7022	8038	5533	5134	6002	6304	6296	5804	4826	5304	3842	4726	5388.19
2832	unknown3005	0.0065055	0.0255615	24	12	6281.41	0.0782995	0.9295	24.0327	6	28896.5	0.00437163	0.0219791	24.0163	9.00205	23830.5	6654.31	0.279235	18410	22839	16969	15987	31302	36729	23375	24180	26322	29798	28548	28053	20418	22555	16266	19617	23835.5
2838	unknown3010	0.0065055	0.0255615	24	12	3372.02	0.0669831	0.9295	23.9024	12	14698.2	0.00380784	0.0200096	23.9512	12	11921.2	3991.79	0.334848	9970	12055	7384	7911	14529	15505	13905	10815	13179	15714	15160	14740	9551	10529	7750	11940	11914.8
2839	unknown3011	0.0065055	0.0255615	24	12	2415.83	0.069577	0.9295	23.7736	12	9593.5	0.0039381	0.0204706	23.8868	12.0003	7639.91	2783.12	0.364288	6197	8006	4590	5173	9001	9911	9541	6721	8743	10135	9673	9823	5842	6411	4720	7587	7629.62
2840	unknown3012	0.0299489	0.0829149	18	9	802.389	0.262022	1	24.4321	6	4355.25	0.0458877	0.137982	21.2161	7.90912	3868.87	730.211	0.18874	3162	3581	2540	2906	5066	5377	3436	3542	4034	4261	4740	4019	3371	3837	2891	3709	3779.5
2867	unknown3037	0.0065055	0.0255615	24	12	948.584	0.122987	0.962988	22.6735	12	5158	0.00650535	0.0299981	23.3368	12.0097	4276.04	1124.94	0.263079	3835	4341	2875	3333	5211	5149	3987	3842	4752	5411	5239	5230	3791	3734	2991	4313	4252.12
2871	unknown3040	0.0254844	0.0764709	24	0	150.967	0.160881	0.979768	23.7736	6.63e-05	723.249	0.0266365	0.0899658	23.8868	3.33e-05	598.149	193.743	0.323905	836	826	639	592	504	666	440	460	526	409	424	480	616	916	592	656	598.875
2886	unknown3054	0.0419656	0.10784	18	12	1148.34	0.243766	1	21.0501	12	6556.5	0.0571074	0.16311	19.5251	12.0737	5341.15	1336.46	0.250219	5006	4818	3040	4134	5832	6354	4288	4847	5697	6667	7274	6588	3947	4812	3412	6387	5193.94
2889	unknown3057	0.00421867	0.0189687	24	12	1373.02	0.100535	0.946907	20.9501	12	8129.75	0.00371766	0.0196072	22.4751	12.0555	6523.36	1858.43	0.284889	6125	6024	3893	5088	7282	7379	5753	6037	7954	8348	8365	7852	4806	6359	4605	7115	6436.56
2900	unknown3067	0.0210199	0.0632056	18	12	1196.25	0.293322	1	23.0287	12	9974.25	0.0375408	0.117197	20.5144	12.183	8738.49	1587.97	0.181721	8614	8900	5642	7270	9725	10542	7492	8748	9317	10782	10871	8927	8248	8087	6561	7808	8595.88
2901	unknown3068	0.00421867	0.0189687	24	12	2958.36	0.0670252	0.9295	23.0287	12	16615	0.00259314	0.0154315	23.5144	12.0051	13682.6	3867.7	0.282673	13476	12280	9319	11239	14364	17279	12676	14774	15413	18206	16570	16271	11775	11465	9834	13011	13622
2902	unknown3069	0.000987235	0.00692825	24	12	1391.94	0.0522306	0.9295	23.3952	12	6546	0.000560638	0.00596682	23.6976	12.002	5202.57	1809.66	0.34784	4956	4065	3328	4280	5426	6872	4997	5901	5655	7198	6856	6475	4420	4126	3424	4978	5184.81
2906	unknown3072	0.0299489	0.0829149	24	12	1748.68	0.165279	0.980144	22.2166	12	9390.5	0.031226	0.101874	23.1083	12.0179	7384.26	2358.65	0.319416	6035	7085	4339	5509	8941	8786	6399	6628	8008	10969	10347	8238	6729	5732	4936	8399	7317.5
2918	unknown3083	0.0210199	0.0632056	24	12	3960.86	0.159878	0.979097	20	12	19790.8	0.0225015	0.0786231	22	12.1	14449.5	6003.05	0.415452	12018	14607	8685	8619	15108	18386	10150	12281	18741	23178	21772	15472	13207	10235	7916	15150	14095.3
2920	unknown3085	0.000987235	0.00692825	24	12	6049.3	0.113764	0.946907	20.7529	12	30620	0.0011337	0.00900718	22.3765	12.0635	23505.5	8989.77	0.382453	18893	22925	14538	17077	26738	28383	23209	21350	23368	39402	28935	30775	20459	18189	14807	19938	23061.6
2926	unknown3090	0.000572095	0.00471842	24	12	5755.85	0.0674043	0.9295	23.2718	12	29207	0.000430473	0.00517764	23.6359	12.0029	22994.9	8060.75	0.350545	19774	21076	13227	17291	25684	29762	23528	22415	23834	35379	30372	27243	20534	18503	17302	20473	22899.8
2927	unknown3091	0.000987235	0.00692825	24	12	4500.2	0.0565431	0.9295	23.2718	12	21769.8	0.000602499	0.00625616	23.6359	12.0029	16985.3	6218.63	0.366119	14808	14782	10056	12427	19165	22040	17348	16696	17287	26062	22492	21238	15624	13028	12776	14762	16911.9
2946	unknown3108	0.0144977	0.0475569	24	6	3535.53	0.0627945	0.9295	20	6	24966	0.00728453	0.0324828	22	6.05	16475.7	8153.09	0.494856	14169	15699	9765	14732	30424	29258	20858	19324	11504	14558	14167	14512	16825	11443	8203	10078	15969.9
2956	unknown3117	0.0144977	0.0475569	24	12	1143.57	0.193541	1	22.1053	12	5987.25	0.0192935	0.0699672	23.0526	12.0203	4855.43	1458.46	0.300377	4016	5381	3284	3580	6118	5758	4744	4088	4982	6827	5708	6432	4599	4081	3275	4114	4811.69
2975	unknown3134	8.77e-05	0.00171035	24	12	1966.82	0.0299068	0.9295	23.1496	12	8175.25	3.63e-05	0.00162155	23.5748	12.0039	6208.22	2516.49	0.405348	4595	5642	3864	4223	7770	7574	6236	5977	7030	8446	8326	8899	4621	5279	4356	5940	6173.62
2985	unknown3143	0.0419656	0.10784	24	15	812.996	0.0706837	0.9295	20	12	6758.75	0.0202314	0.072759	22	13.475	5341.16	1790.85	0.335293	4706	5201	4230	4002	5574	5300	4654	4113	6723	7594	6552	6166	5025	5011	3971	5866	5293
2991	unknown3149	0.00267199	0.0134688	24	21	2084.2	0.0786735	0.9295	24.9858	17.9999	8312.48	0.00199019	0.0128428	24.4929	19.5381	5962.76	2226.34	0.373374	6520	6363	4976	8076	5324	4956	3367	3501	3414	4474	5714	4737	9437	9519	6151	8143	5917
2994	unknown3151	0.0419656	0.10784	24	12	1910.6	0.428855	1	23.0287	12	11085.5	0.0903014	0.23988	23.5144	12.0051	9309.16	2363.23	0.253861	8266	11319	5180	7517	10684	11130	9442	8707	9213	12553	10717	11859	9129	7642	5857	9139	9272.12
2999	unknown3156	0.0419656	0.10784	24	12	1117.23	0.142094	0.966499	24.1644	6	8238.5	0.0365068	0.114547	24.0822	9.01034	7400.03	1109.14	0.149883	5968	8018	5408	6442	8961	8489	7938	7566	7664	8727	8133	8014	6714	6901	5936	7589	7404.25
3042	unknown3195	0.0299489	0.0829149	24	9	1767.59	0.169617	0.981551	24.0327	6	7769.75	0.031914	0.103822	24.0163	7.50102	6531.34	1751.77	0.26821	5465	7262	4514	4672	9228	9013	7051	5787	6213	8410	7311	8699	5910	5231	4420	5335	6532.56
3090	unknown3238	0.0210199	0.0632056	18	12	1700.95	0.25177	1	23.3952	12	9100.75	0.0330312	0.106827	20.6976	12.2074	7048.16	2798.39	0.397038	5458	9258	3243	4223	9315	9013	6580	6109	7365	9715	8750	10573	4859	4190	3859	6432	6808.88
3099	unknown3246	0.0419656	0.10784	18	3	753.422	0.640671	1	20	6.31e-05	4081.75	0.12411	0.309561	19	1.58336	3551	1114.41	0.313829	3849	5841	2952	3685	4150	4408	2839	2756	2373	2480	3194	2463	6429	5088	3495	3838	3740
3116	unknown3261	0.000572095	0.00471842	24	12	1986.62	0.0632897	0.9295	20.7529	12	10360	0.000406476	0.00505759	22.3765	12.0635	8002.54	2875.3	0.359298	6418	6999	5023	6478	8286	9354	7561	8123	9777	10893	12117	8653	7237	6200	4769	7881	7860.56
3119	unknown3264	0.000572095	0.00471842	24	12	2461.09	0.0504655	0.9295	23.1496	12	11868.5	0.00033065	0.00445769	23.5748	12.0039	9250.45	3405.75	0.368172	7114	8496	5937	7215	10289	11305	9256	10004	10706	12961	13677	10130	8039	7236	5753	9140	9203.62
3120	unknown3265	0.0299489	0.0829149	18	6	1331.48	0.744651	1	20	5.99998	6582.75	0.107116	0.273636	19	6.01666	5815.58	669.102	0.115053	4685	5264	5211	7027	8232	7180	6309	4610	2760	4076	4214	3485	9502	7909	6228	5060	5734.5
3138	unknown3281	0.0419656	0.10784	24	12	487.904	0.306726	1	20	12	4752.25	0.0688997	0.191732	22	12.1	4070.49	758.323	0.186298	3836	4161	3017	3305	4045	4210	4492	3320	4085	5201	5149	4574	3719	3894	3006	4398	4025.75
3150	unknown3292	0.0499351	0.128016	18	6	435.224	0.808777	1	20	6	4738.5	0.169997	0.390719	19	6.01667	4399.09	318.959	0.0725056	4390	4206	3793	4638	5054	5307	4109	4484	3480	3657	3913	4109	4794	5325	4195	4313	4360.44
3157	unknown3299	0.00164724	0.00965163	18	12	1233.55	0.0641321	0.9295	23.2718	12	7903.75	0.00107283	0.0087319	20.6359	12.199	6204.58	2281.09	0.367646	4762	5851	3910	4661	6538	7277	7061	6432	6315	9644	7817	7839	5194	4173	3114	5511	6006.19
3167	unknown3307	0.0144977	0.0475569	24	12	670.16	0.127434	0.963963	20	12	5299.5	0.0134755	0.0527568	22	12.1	4268.52	1109.51	0.259928	3564	4745	3015	3027	4467	4230	3949	3763	4508	5826	5472	5392	3864	3952	3055	4420	4203.06
3196	unknown3333	0.00267199	0.0134688	18	12	4057.38	0.0575961	0.9295	24.1644	12	38359.2	0.00150499	0.010746	21.0822	12.2621	32103.6	9785.28	0.304804	28452	34192	18699	25709	39448	41595	33010	33782	34321	42928	37571	38617	25468	22823	19493	25633	31358.8
3204	unknown3340	0.00267199	0.0134688	18	12	1954.44	0.0325671	0.9295	23.9024	12	12378.5	0.000900595	0.00790989	20.9512	12.2429	9872.49	3720.25	0.37683	7495	8312	5410	7516	13295	13543	10723	9579	10151	14387	12451	12525	7229	7264	5848	7508	9577.25
3209	unknown3345	0.000572095	0.00471842	24	12	1981.67	0.0333851	0.9295	23.2718	12	7251.75	0.000226631	0.00387044	23.6359	12.0029	5428.49	2452.56	0.451793	4112	5272	3369	3515	6860	6945	5685	5348	6410	8414	6952	7231	4088	3904	3532	4756	5399.56
3210	unknown3346	0.00267199	0.0134688	24	12	1288.7	0.0530721	0.9295	20	12	5915.25	0.00139838	0.0103151	22	12.1	4377.64	1810.81	0.41365	3671	4376	2722	2879	5065	4941	3793	3662	5284	6205	6484	5688	3292	3228	3041	4002	4270.81
3231	unknown3365	0.00164724	0.00965163	24	0	1663.47	0.15033	0.966499	23.9024	6.63e-05	5279.99	0.00230384	0.0143123	23.9512	3.32e-05	4195.98	2151.85	0.512835	4127	4121	5917	6955	2886	3510	3129	3414	2823	2913	2631	2606	5875	7859	5123	3302	4199.44
3232	unknown3366	0.0499351	0.128016	18	3	327.037	0.286315	1	23.0287	6.63e-05	1989	0.0750272	0.205353	20.5144	1.70956	1724.05	447.392	0.259501	1559	2306	2015	2076	2027	1828	1260	1362	1263	1568	1359	1362	2255	2492	1684	1873	1768.06
3243	unknown3376	0.0419656	0.10784	18	9	1042.28	0.49843	1	24.0327	6	5785.5	0.101807	0.262934	21.0163	7.87756	5090.66	1059.74	0.208174	3487	6251	3280	3598	7245	6526	5391	3980	4581	6633	5062	6480	4600	4472	3606	4049	4952.56
3250	unknown3382	0.0144977	0.0475569	18	15	1325.29	0.333775	1	20	12	6266.5	0.0306358	0.10064	19	13.6167	4889.32	1756.65	0.359283	4895	5406	4188	4853	3544	3900	3111	3404	5842	7403	6981	4840	4850	4083	3253	7404	4872.31
3288	unknown3416	0.0065055	0.0255615	18	12	263.397	0.122208	0.960364	24.0327	6	4660.5	0.00646922	0.0298632	21.0163	9.62892	4183.42	712.572	0.170332	3911	4065	3192	3121	5060	5467	4104	4011	4319	5242	4380	4441	3640	3712	3069	3655	4086.81
3323	unknown3448	0.0419656	0.10784	24	15	411.006	0.380223	1	20	12	5135.5	0.0819818	0.221172	22	13.475	4418.71	888.641	0.201109	3920	5127	3061	3771	4429	4115	4304	4032	4559	5714	5346	4923	4211	4498	3529	4778	4394.81
3335	unknown3459	0.0299489	0.0829149	24	12	3343.2	0.10428	0.946907	24.0327	12	15324	0.02114	0.0752145	24.0163	12	12967.8	3954.21	0.304925	10828	14799	8323	9599	16526	18182	13524	12961	14417	16525	15035	15319	11342	10964	7947	11228	12969.9
3344	unknown3467	0.000572095	0.00471842	24	12	2176.83	0.0296677	0.9295	22.7907	12	10382.2	0.0002034	0.00370531	23.3953	12.008	8136.93	2817.81	0.3463	6333	6980	5267	6812	9330	9786	8553	7465	9617	10723	11333	9856	6216	6584	6335	8125	8082.19
3376	unknown3496	0.0299489	0.0829149	18	3	1407.67	0.314	1	20	5.24e-05	8008.99	0.0532888	0.155276	19	1.58336	6788.91	1638.24	0.241311	7632	8693	9078	6633	8233	7019	6855	5252	4940	6313	4717	5322	9258	10016	7031	6076	7066.75
3377	unknown3497	0.0299489	0.0829149	18	3	1245.57	0.319597	1	20	6.63e-05	9359.75	0.0540694	0.157023	19	1.58336	8514.21	1336.15	0.156932	9061	11512	8696	8170	10055	9819	8093	8017	6966	7615	6614	7304	10541	9964	8989	8437	8740.81
3409	unknown3525	0.0210199	0.0632056	24	0	846.053	0.257057	1	23.9024	4.69e-05	4873.25	0.0336126	0.107914	23.9512	2.35e-05	3917.89	1082.77	0.276365	5352	5965	3667	4509	3701	4692	2835	3781	3317	3177	2688	2603	5184	4378	2892	3973	3919.62
3420	unknown3535	0.0065055	0.0255615	18	12	1139.5	0.0734378	0.9295	23.2718	12	7477.75	0.00413082	0.0210677	20.6359	12.199	6143.58	1765.15	0.287315	4711	5726	4126	5148	7288	6622	7252	5429	6169	8990	7510	7242	4708	4812	4453	5655	5990.06
3435	unknown3549	0.00267199	0.0134688	24	0	893.429	0.143421	0.966499	23.7736	6.63e-05	3627.99	0.00339797	0.0184376	23.8868	3.33e-05	2798.73	1056.78	0.377595	3578	4541	3198	3195	3139	2655	2249	2016	1931	2309	1666	1827	4073	3773	2377	2316	2802.69
3437	unknown3550	0.0144977	0.0475569	24	0	1768.3	0.427169	1	23.6461	6.04e-05	7910.24	0.0376802	0.117547	23.8231	3.04e-05	5879.74	2332.86	0.396762	7908	12411	4648	6674	6084	7545	4065	4437	4126	4196	3075	3703	8400	7302	4561	5161	5893.5
3448	unknown3560	0.00980952	0.0347873	24	21	1477.85	0.199107	1	23.7736	17.9999	6846.74	0.0141375	0.054951	23.8868	19.4933	5834.6	1636.12	0.280417	7379	8881	5099	6635	4937	4877	4614	3639	3834	5854	5220	5125	7545	8263	5226	6353	5842.56
3478	unknown3588	0.00980952	0.0347873	24	12	997.197	0.267672	1	23.7736	12	4992.25	0.0182289	0.066721	23.8868	12.0003	4167.9	1190.67	0.285675	3395	5008	2916	3169	5481	5121	4227	3735	4317	5606	4548	5498	3709	3617	2560	3709	4163.5
3495	unknown3602	0.000987235	0.00692825	24	0	844.109	0.09407	0.93685	24.2975	6.63e-05	2276.24	0.000955097	0.00822181	24.1488	3.3e-05	1373.84	1140.98	0.830506	1845	3712	1908	1640	788	919	849	445	667	662	468	709	2260	2471	1465	1086	1368.38
3499	unknown3606	0.0065055	0.0255615	24	0	1630.77	0.317112	1	24.2975	6.63e-05	8802.48	0.0148196	0.0569377	24.1488	3.3e-05	6667.53	2472.93	0.370891	8296	13283	6351	7280	6837	7261	5311	4326	4979	5183	4022	4506	9072	8147	5459	6178	6655.69
3517	unknown3622	0.0121536	0.0429944	24	0	1846.08	0.229388	1	24.8451	6.63e-05	8154.48	0.0191876	0.0696999	24.4225	3.26e-05	5850.45	2543.79	0.434804	7866	11892	6429	6431	5168	5244	4217	3216	4208	4667	3002	4742	8712	7654	5168	4454	5816.88
3529	unknown3633	0.0144977	0.0475569	24	0	1757.87	0.146008	0.966499	23.9024	6.63e-05	5918.74	0.0151516	0.0580588	23.9512	3.32e-05	4354.84	2122.2	0.487319	4251	8493	5902	5029	4602	4235	2896	2402	2712	2979	2392	3033	5955	6229	5159	3463	4358.25
3540	unknown3643	0.00267199	0.0134688	24	0	2591.37	0.0430642	0.9295	24.1644	6.63e-05	5204.73	0.00115873	0.00908929	24.0822	3.3e-05	2844.31	3188.92	1.12115	4638	7597	5649	2935	994	1222	864	576	1192	842	605	886	4515	6458	3887	2513	2835.81
3544	unknown3647	0.000572095	0.00471842	24	21	839.689	0.0802958	0.9295	24.2975	17.9999	2050.24	0.000504765	0.00567696	24.1488	19.5099	1263.22	877.059	0.694302	1174	2115	2001	1236	615	617	624	432	851	704	577	976	1812	2891	2501	997	1257.69
3551	unknown3653	0.0144977	0.0475569	18	12	642.053	0.207124	1	20	12	6644.25	0.0204439	0.0732529	19	12.0333	5819.18	916.23	0.15745	5669	5214	5341	5894	5090	5922	5364	5571	6335	7363	6670	6209	4753	5844	4904	5232	5710.94
3582	unknown3681	0.00267199	0.0134688	24	0	465.453	0.111219	0.946907	24.0327	6.63e-05	2139.25	0.0027106	0.015764	24.0163	3.31e-05	1603.41	653.484	0.407558	1796	2865	2004	1892	1485	1597	1457	1189	1462	1179	769	850	2227	1974	1515	1388	1603.06
3633	unknown396	0.0144977	0.0475569	18	15	3400.48	0.103774	0.946907	20	12	14220	0.0112826	0.0456747	19	13.6167	9537.4	5171.71	0.542255	8045	6944	7774	9912	5020	6265	4502	6519	9610	14940	20031	12299	7971	8384	9762	13819	9487.31
3635	unknown398	0.000987235	0.00692825	18	6	17982.1	0.264588	1	20	6	47832.5	0.00241625	0.0147565	19	6.01667	22120.5	26651.8	1.20484	17549	1137	1322	7306	40783	74964	25680	49903	3282	3294	1545	1000	37326	23826	4403	8934	18890.9
3642	unknown403	0.000572095	0.00471842	18	6	27849.6	0.19932	1	20	6	81839.8	0.00114931	0.00905748	19	6.01667	36723.3	46472	1.26546	27873	2640	3678	10688	63901	126136	41110	96212	5035	5439	3196	1488	54588	32511	6720	16254	31091.8
3649	unknown41	0.00421867	0.0189687	18	6	1603.01	0.569788	1	20	6	7633	0.0169001	0.0629392	19	6.01667	5709.33	2131.81	0.373391	4603	4935	3297	3493	8324	9076	5091	8041	4740	3800	4452	3898	5904	5321	5679	6562	5451
3660	unknown42	0.0065055	0.0255615	18	6	2172.23	0.531735	1	20	6	10253	0.0230615	0.0802059	19	6.01667	7610.29	2896.35	0.380584	6009	6763	4512	4638	11213	11906	6647	11246	6204	5016	5875	4992	7741	7030	7579	8778	7259.31
3680	unknown438	0.0419656	0.10784	18	6	3899.87	0.705285	1	20	6	8170	0.133783	0.326724	19	6.01667	5828.73	2286.75	0.392323	9171	1594	2571	4907	7405	9960	6575	8740	1757	2256	1862	1055	10109	8973	4159	7732	5551.62
3684	unknown441	0.000171384	0.00241724	18	6	22082.2	0.114547	0.946907	20	6.00001	51649.2	0.000232405	0.00387044	19	6.01667	24365.7	27841.1	1.14264	18896	3423	4537	12219	43962	61041	33474	68120	4424	4519	4501	2032	33360	18848	6410	16104	20991.9
3685	unknown442	0.000572095	0.00471842	18	6	2013.13	0.144848	0.966499	20	6.00001	4900.5	0.000861672	0.00771425	19	6.01667	2416.7	2537.11	1.04983	2073	439	520	1215	4299	6076	3161	6066	586	443	531	215	3506	2195	749	1674	2109.25
3706	unknown461	0.000987235	0.00692825	18	6	3752.26	0.472005	1	20	6	8571.75	0.00404068	0.020804	19	6.01667	5246.53	3573.95	0.681203	4269	1316	2264	3133	8187	10858	7392	7850	2101	2694	2528	1454	8843	5657	3248	5221	4813.44
3707	unknown462	4.22e-05	0.00116331	18	3	1129.25	0.0716947	0.9295	25.2722	6.63e-05	11525.2	4.15e-05	0.0017428	21.6361	1.80304	10407.9	4609.38	0.442872	15656	9632	9445	11368	9001	9047	8466	7715	7488	8744	7779	6481	14512	15722	13042	16453	10659.4
3711	unknown466	1.91e-05	0.000802606	24	12	3735.65	0.0414248	0.9295	20	12	16807	1.19e-05	0.00102703	22	12.1	9902.33	7555.04	0.762956	6294	5095	5089	4210	7889	9493	7436	11420	15730	18084	22476	10938	5191	7118	6460	8383	9456.62
3713	unknown468	4.22e-05	0.00116331	18	6	9497.86	0.539315	1	20	6.00001	20145.2	0.000265951	0.00409811	19	6.01667	12114.6	8407.81	0.694022	11014	3208	4279	7681	22742	24205	17269	16365	2817	3225	3032	2099	23289	15729	7926	12652	11095.8
3714	unknown469	0.00980952	0.0347873	18	3	2088.44	0.208547	1	24.9858	6.63e-05	13449.5	0.014713	0.056679	21.4929	1.79111	11721.3	5782.6	0.493341	17799	13625	9465	12909	10305	13131	5320	8637	5673	8054	12609	6307	18673	18832	11638	20075	12065.8
3718	unknown472	0.00980952	0.0347873	18	6	1168.49	0.694923	1	20	6	3885.25	0.0408218	0.124944	19	6.01667	2884.98	1110.75	0.385012	2630	1027	1769	2710	3366	4691	3688	3796	1811	2679	2330	1704	3994	2762	2176	2873	2750.38
3749	unknown50	0.000987235	0.00692825	18	6	2665.79	0.283543	1	20	6	6976.5	0.00256997	0.0154127	19	6.01667	4507.74	2528.72	0.560973	3138	5313	1834	2004	6926	8550	5540	6890	1978	2324	2313	1964	6161	4518	3509	4259	4201.31
3754	unknown504	0.0299489	0.0829149	18	15	109522	0.321056	1	20	12	290937	0.0542725	0.157292	19	13.6167	192241	125541	0.65304	262819	145681	26908	312924	156216	30368	159857	19060	247273	336962	327601	251911	193159	206141	158700	220819	191025
3757	unknown507	0.0065055	0.0255615	18	6	4011.24	0.618071	1	20	6.00001	13318	0.026201	0.0888411	19	6.01667	10077.4	3400.21	0.337411	10478	4903	6360	9778	13108	15436	13199	11529	6369	8237	7273	5272	14263	10778	7841	9821	9665.31
3767	unknown516	0.00421867	0.0189687	18	12	2956.41	0.198676	1	20	12	18169.2	0.00677584	0.0309161	19	12.0333	14570.4	4201.89	0.288384	14823	8065	10397	15131	11780	15724	14792	16880	15412	19793	19235	18237	11439	10081	8998	14398	14074.1
3770	unknown519	0.0419656	0.10784	18	15	14604.9	0.912853	1	20	12	62449.8	0.163274	0.379279	19	13.6167	47308.5	19054.6	0.402773	54385	27850	47455	72899	27499	45744	33301	42330	48646	71980	78114	51059	38554	37064	30620	46484	47124
3773	unknown521	0.0299489	0.0829149	18	15	3904.64	0.685016	1	20	12	20018.8	0.10025	0.259778	19	13.6167	14641.5	6223.87	0.425084	15751	9848	13323	21763	8904	13935	11267	12981	17462	20495	25172	16946	11600	11638	8962	13253	14581.2
3775	unknown523	0.00267199	0.0134688	18	12	1932.17	0.0210847	0.9295	23.9024	12	11579.5	0.00060756	0.0062774	20.9512	12.2429	8950.59	3920.77	0.438046	6406	5896	5147	6638	11341	12918	8997	10965	9109	13008	12616	11585	6094	5569	4911	7031	8639.44
3777	unknown525	0.0419656	0.10784	18	15	851.18	0.703629	1	20	12	4521	0.133539	0.326679	19	13.6167	3603.94	1097.57	0.304548	4028	2282	3519	4745	2272	3484	2666	3405	3807	5016	5400	3861	3170	3051	2960	3827	3593.31
3784	unknown531	0.0419656	0.10784	24	15	425.855	0.498596	1	22.5575	12	4737.5	0.101834	0.262934	23.2788	13.4665	4237.1	598.019	0.141139	3964	4339	3724	3171	4139	4488	3234	4581	4579	4611	5168	4592	3702	3978	4567	4842	4229.94
3792	unknown539	0.0419656	0.10784	24	15	2915.05	0.12936	0.963963	20.5594	12	24727.2	0.0337449	0.108153	22.2797	13.4645	20144.2	5643.53	0.280156	17745	19946	14563	15629	21193	21111	15781	17631	23089	22449	28049	25322	17504	17501	18679	23894	20005.4
3835	unknown578	0.00421867	0.0189687	18	6	3200.72	0.738687	1	20	5.99998	8697.5	0.0211007	0.0751364	19	6.01666	5921.59	2911.74	0.491715	6378	2520	2395	4382	7855	10873	6807	9255	2466	2769	2766	1328	10955	7435	4073	6843	5568.75
3842	unknown584	0.00164724	0.00965163	24	12	3537.48	0.0149396	0.9295	23.9024	12	9757.25	0.00028577	0.00419453	23.9512	12	6782.11	4304.02	0.634614	4532	4708	2929	4293	8961	10152	7255	8389	8588	10213	10514	9714	4312	3876	3924	6044	6775.25
3844	unknown586	0.00164724	0.00965163	18	6	2180.36	0.133987	0.964981	20	6	8078.75	0.00207879	0.0132538	19	6.01667	4488.87	3802.67	0.847132	2703	1519	2109	2396	6858	11382	4877	9198	1954	2691	2945	2127	4264	2977	2748	3701	4028.06
3867	unknown606	0.0299489	0.0829149	18	0	1226.83	0.453576	1	20	17.9999	7701.74	0.0719803	0.198225	19	18.05	6537.45	1254.97	0.191966	9316	4938	7949	8810	5186	6391	4615	4849	5444	7698	7340	5619	9257	7528	6310	7712	6810.12
3924	unknown658	0.000446109	0.00471842	18	6	247.487	0.506519	1	20	6	735.5	0.00212295	0.0134195	19	6.01667	511.62	245.465	0.47978	461	205	322	322	742	889	672	639	244	405	357	249	639	578	466	520	481.875
3970	unknown7	0.0210199	0.0632056	24	3	572.933	0.113115	0.946907	20	5.01e-05	6783.25	0.0167426	0.0625269	22	1.37503	6291.87	802.091	0.127481	6988	7284	6317	6544	6507	7421	5853	6873	5555	5403	5264	5677	6566	6471	6824	5805	6334.5
4011	unknown736	0.00164724	0.00965163	18	12	9868.74	0.0164672	0.9295	23.9024	12	48522	0.00031235	0.00441986	20.9512	12.2429	37606.5	15575	0.414158	28697	29485	20330	26598	42235	49256	37788	48661	46415	46235	51868	49570	24016	26371	22535	31867	36370.4
4039	unknown761	0.00421867	0.0189687	24	12	2800.67	0.0597801	0.9295	20.9501	12	14051.8	0.00234169	0.0144643	22.4751	12.0555	11253.9	3549.77	0.315425	10755	10040	7183	8981	10717	13372	10108	13209	14333	12923	15299	13652	9137	9002	8181	10518	11088.1
4054	unknown775	0.00267199	0.0134688	18	3	933.027	0.112014	0.946907	23.7736	6.63e-05	5483.99	0.00272785	0.015764	20.8868	1.7406	4197.21	1798.27	0.428443	6195	7590	3774	4377	4106	4164	2752	2901	2536	2687	2787	3653	5383	5546	4706	6378	4345.94
4060	unknown780	0.0419656	0.10784	24	12	1972.65	0.277899	1	23.3952	12	9214	0.0635754	0.17888	23.6976	12.0019	7346.61	2335.74	0.317935	6219	6991	4276	5161	9121	9643	6060	7040	7761	10447	10486	8162	6131	5499	4774	9408	7323.69
4121	unknown835	0.00164724	0.00965163	18	9	1288.53	0.254946	1	20	6	5231	0.00368528	0.0194975	19	7.6	3974.71	1171.42	0.294719	2372	2444	1979	3633	5159	5449	5228	5088	2131	4039	3981	4292	3514	3730	2831	4041	3744.44
4163	unknown873	0.00164724	0.00965163	24	12	5365.35	0.0359669	0.9295	22.9091	12	17451	0.000635937	0.0064098	23.4545	12.0065	12038.5	7072.88	0.58752	7216	10939	6477	7453	15222	16655	10208	13771	19902	14093	17283	18526	6831	9833	6658	9562	11914.3
4172	unknown881	0.0299489	0.0829149	18	3	526.795	0.57065	1	27.3065	6.63e-05	4888	0.0866352	0.232279	22.6533	1.8878	5087.28	1971.26	0.387488	6120	4913	4330	4189	5194	5616	3132	4760	4249	3442	4736	3591	5436	9342	5796	7325	5135.69
4173	unknown882	0.0299489	0.0829149	24	12	2908.86	0.332941	1	24.9858	12	17286.2	0.0559192	0.160777	24.4929	12.0049	14777.8	3274.74	0.221598	14733	11090	10239	10562	15882	18097	12014	18577	20004	15659	18262	15220	11532	16595	11629	17203	14831.1
4179	unknown888	0.0419656	0.10784	24	9	1073.03	0.50033	1	24.5682	6.00002	9175.25	0.102115	0.263107	24.2841	7.51859	8042.97	1174.21	0.145993	7529	6231	9577	7799	7969	10105	8903	9724	6522	10798	8485	8065	7527	5716	6938	7028	8057.25
4181	unknown89	0.0419656	0.10784	18	15	45705.6	0.675592	1	20	12	191673	0.12937	0.319188	19	13.6167	139584	65365.8	0.468289	174773	76567	132112	205301	80843	120421	86230	115875	148174	219345	236829	162343	110984	113904	99068	140452	138951
4183	unknown891	0.0299489	0.0829149	24	12	3778.43	0.36892	1	24.1644	12	25810.8	0.0608283	0.172373	24.0822	12.0001	21991.9	4360.77	0.19829	21273	21554	13123	16310	26799	24459	17626	22521	23385	26933	27481	25444	20288	21491	16505	26867	22003.7
4189	unknown897	0.0299489	0.0829149	24	12	1005.33	0.367701	1	23.52	12	11283.2	0.0606637	0.17202	23.76	12.0012	10053.4	1619.74	0.161114	8724	7654	9964	9625	9919	10173	11183	11031	10001	14137	10650	10345	9063	9572	8332	10279	10040.8
4191	unknown899	0.0065055	0.0255615	24	12	2116.37	0.078378	0.9295	23.52	12	11129.8	0.00437551	0.0219791	23.76	12.0012	9189.19	2394.67	0.260597	7964	7663	6977	7010	9878	11000	7423	10903	12191	10677	11296	10355	7650	8570	7118	10053	9170.5
4194	unknown900	0.0299489	0.0829149	24	12	2781.4	0.395	1	23.3952	12	31425.5	0.0643204	0.180614	23.6976	12.002	27867.4	4569.34	0.163967	24509	20935	27557	26020	27319	27480	31233	30771	27863	39415	30332	28092	24933	26720	22773	29209	27822.6
4195	unknown901	8.77e-05	0.00171035	18	12	3277.44	0.0228848	0.9295	20.5594	12	12379.5	2.83e-05	0.00148587	19.2797	12.0531	8826.74	4193.87	0.475132	6232	5477	5107	6823	9537	8084	8600	11403	12165	12422	13094	11837	5037	6789	4221	6738	8347.88
4197	unknown903	0.000171384	0.00241724	24	12	14138.4	0.0330424	0.9295	22.1053	12	59725.8	7.41e-05	0.00227495	23.0526	12.0203	45002.5	18608	0.413488	40820	36866	25143	33482	46271	49193	42677	57143	63504	58744	59317	57338	36633	35656	26637	41686	44444.4
4207	unknown912	0.0299489	0.0829149	18	12	2078.89	0.1895	0.994309	21.6708	12	12700	0.035026	0.111353	19.8354	12.1036	10465.2	2758.52	0.26359	9538	9338	7481	8199	8163	12058	9325	14168	15017	11121	12588	12074	8282	8963	7273	9247	10177.2
4208	unknown913	0.0419656	0.10784	24	12	1386.28	0.205759	1	21.5648	12	8398	0.049667	0.146998	22.7824	12.0344	6651.55	1759	0.26445	5620	5880	4277	5097	6792	7840	4861	6175	7704	9392	8906	7590	6354	5611	4505	8751	6584.69
4210	unknown915	0.0419656	0.10784	18	9	420.375	0.457669	1	24.0327	12	5366	0.0951196	0.24992	21.0163	10.501	5033.1	399.865	0.0794472	4516	4255	4869	4744	4870	5713	4860	5222	4844	6120	5680	4820	4687	4581	4748	5205	4983.38
4216	unknown920	0.0065055	0.0255615	24	21	757.842	0.220654	1	25.8651	17.9999	4785.24	0.0108324	0.0443377	24.9326	19.5835	3529.59	1012.1	0.286747	3938	4011	3010	3196	3030	3431	2162	2526	3140	2623	2844	2806	3388	6534	5036	4183	3491.12
4221	unknown925	0.0065055	0.0255615	18	9	3981.72	0.0765973	0.9295	24.1644	12	14296	0.00428755	0.0216629	21.0822	10.5052	12025.2	3578.75	0.297605	9557	9284	6433	8334	15012	15091	9644	17016	14515	12087	17407	13175	9066	9890	8202	10721	11589.6
4230	unknown933	0.00421867	0.0189687	24	12	2832.67	0.12041	0.960278	23.1496	12	13264.5	0.00436095	0.0219569	23.5748	12.0039	10215.7	3772.78	0.369311	6006	6976	7568	9752	8033	11859	11260	13290	11014	11482	14513	16049	7057	9503	7508	10752	10163.9
4232	unknown935	0.00267199	0.0134688	24	12	6618.17	0.0161231	0.9295	24.0327	12	16944.2	0.000476147	0.005516	24.0163	12	11833.8	7961.77	0.672799	7169	8307	5155	6162	17722	18938	12992	14835	20235	16062	16651	14829	7205	8872	6044	8231	11838.1
4234	unknown937	0.000171384	0.00241724	24	21	1214.81	0.127307	0.963963	24.1644	17.9999	7224.99	0.000255989	0.00403925	24.0822	19.5053	5937.52	1380.45	0.232496	6016	7711	6040	6029	4953	5688	3139	5060	5790	4153	5790	5654	6425	8519	6825	7131	5932.69
4238	unknown940	0.00267199	0.0134688	24	0	1186.7	0.0589236	0.9295	24.2975	6.63e-05	3285.49	0.00153609	0.0108681	24.1488	3.3e-05	2060.84	1545.24	0.749808	2694	4894	2295	3259	1752	1405	810	929	1019	848	936	1373	2908	3392	2083	2258	2053.44
4262	unknown962	0.0419656	0.10784	18	6	1563.77	0.749389	1	20	6.00001	12030.5	0.140242	0.337956	19	6.01667	10719.5	1328.72	0.123953	12247	9270	8161	10335	12576	12922	10007	12617	8342	9931	10422	9079	10395	10647	10539	11446	10558.5
4277	unknown976	0.0065055	0.0255615	24	12	893.429	0.153973	0.974165	22.5575	12	6046	0.00791929	0.0346719	23.2788	12.0115	5060.09	1160.83	0.22941	4368	5054	3222	4278	5989	5631	4539	4768	5382	6207	6163	6432	4571	4378	3899	5652	5033.31
4299	unknown996	0.00980952	0.0347873	18	9	496.389	0.150351	0.966499	23.52	5.99999	5874	0.0110898	0.045173	20.76	7.83795	5445.57	515.336	0.094634	4790	4549	5052	5376	5734	5774	5627	6361	5389	6136	5792	5084	5008	4879	5204	5218	5373.31
4313	Val-Gln	0.00421867	0.0189687	24	12	5394.16	0.0409414	0.9295	23.6461	12	26116.8	0.00166912	0.0114936	23.8231	12.0007	21171.9	6670.86	0.315081	19914	16500	15225	15644	24800	24805	20875	23742	23248	24496	28520	28203	18563	14942	16489	22169	21133.4
4322	Val-Ser	0.0419656	0.10784	24	12	2206.53	0.242465	1	24.0327	12	10549.2	0.056857	0.162717	24.0163	12	8892.77	2650.84	0.29809	7594	9905	5503	5860	12984	11717	8696	8167	8893	12119	10556	10629	8048	7055	5700	8881	8894.19
4323	Val-Thr	0.00267199	0.0134688	18	9	18996.8	0.070097	0.9295	24.2975	6.00003	78118	0.00179485	0.0119184	21.1488	7.89843	66389.5	16936.7	0.255112	50158	55362	40369	46944	90104	80447	61516	80405	66005	71434	78376	84035	52336	49861	50596	70389	64271.1
4327	Vanillin	0.0419656	0.10784	24	0	11886.8	0.243475	1	23.7736	6.63e-05	45665.9	0.0570514	0.163058	23.8868	3.33e-05	36873.6	14486.7	0.392875	52313	45077	43420	41854	33394	36191	21231	32328	22995	19211	45178	19166	47106	38730	32616	60036	36927.9

## Sheet: unique cycling AM in TM
ID	CycID	JTK_pvalue	JTK_BH.Q	JTK_period	JTK_adjphase	JTK_amplitude	LS_pvalue	LS_BH.Q	LS_period	LS_adjphase	LS_amplitude	meta2d_pvalue	meta2d_BH.Q	meta2d_period	meta2d_phase	meta2d_Base	meta2d_AMP	meta2d_rAMP	X0	X0.1	X0.2	X0.3	X6	X6.1	X6.2	X6.3	X12	X12.1	X12.2	X12.3	X18	X18.1	X18.2	X18.3	TM
1	(-)-Riboflavin	0.301037	0.410161	18	12	2150.31	0.426608	0.859169	20	12	10408.2	0.392006	0.59704	19	12.0333	7990.72	2619.67	0.327839	6424	9547	5707	5083	6768	6386	6433	9436	9112	10660	12617	9244	9611	7104	5126	3642	7681.25
10	1,7-Dimethyluric acid	0.182589	0.274136	24	3	225.214	0.492167	0.937476	24.9858	6.63e-05	1388.25	0.306388	0.488461	24.4929	1.53084	1195.59	174.611	0.146045	1445	1160	1617	1331	1387	1181	1757	933	1222	1126	951	782	990	1240	917	1069	1194.25
13	1H-Indole-1-pentanoic acid, 3-[(2,2,3,3-tetramethylcyclopropyl)carbonyl]-	0.139706	0.220455	18	15	4198.09	0.997873	1	20	12	26176.5	0.414093	0.622161	19	13.6167	22771.8	5914.06	0.25971	23201	29352	27376	23763	18586	14646	25826	16412	23283	26840	28797	25786	23191	24832	15917	15625	22714.6
14	1-Methyladenosine	1	1	18	12	9.54594	1	1	23.6461	17.9999	765	1	1	20.8231	14.8665	758.322	6.13639	0.00809206	800	822	708	689	766	818	728	695	620	818	825	787	946	848	607	659	758.5
20	2'-Deoxyadenosine	0.587657	0.717585	18	15	14522.9	0.993886	1	20	12	68661.2	0.898142	1	19	13.6167	54808.4	18695	0.341097	54674	75592	64825	39891	38674	46702	38352	48952	43872	95566	89581	45626	70430	58343	30450	32507	54627.3
27	2-Phenylacetamide	0.0787266	0.137955	24	12	593.616	0.315734	0.70946	23.6461	12	1852.5	0.116693	0.22427	23.8231	12.0007	1261.87	801.358	0.635056	751	643	681	916	1510	1185	904	2609	2564	1572	2121	1153	1606	1077	437	387	1257.25
31	3-[5-(2-Methylpropyl)-3,6-dioxopiperazin-2-yl]propanoic acid	0.0787266	0.137955	24	12	14281.1	0.489975	0.935446	23.2718	12	78682.2	0.164139	0.294757	23.6359	12.0028	61201.5	18425.9	0.301069	46312	50604	43940	38523	69967	58186	60720	58714	70776	89151	90941	63861	84950	86289	32858	29954	60984.1
46	3-Methylhexahydropyrrolo[1,2-a]pyrazine-1,4-dione	1	1	18	12	1305.14	0.994597	1	23.9024	12	7681.5	0.999985	1	20.9512	12.2429	6682.28	809.989	0.121214	6238	5411	7023	3572	7520	7377	5858	3891	5472	9661	9730	5863	11091	8648	4494	4039	6618
66	6-Hydroxycaproic acid	1	1	24	12	298.753	0.996659	1	20	12	4813	0.999994	1	22	12.1	4311.43	633.46	0.146926	3616	4519	4503	4729	3247	4113	4237	5369	4208	4332	4632	6080	3747	3398	3102	4553	4274.06
85	Ala-Asn	0.139706	0.220455	18	12	1378.5	0.332043	0.731394	20	12	7657	0.188834	0.331063	19	12.0333	6251.95	1451.35	0.232144	4835	6460	5243	5647	5388	5280	4974	6692	7428	7874	8208	7118	7373	6650	4215	3903	6080.5
87	Ala-Gln	0.380147	0.496542	24	15	1822.21	0.583976	1	20	12	17556.8	0.556123	0.782449	22	13.475	14411.5	4059.07	0.281655	11772	13832	12409	13932	13763	12901	9520	15220	15658	19165	20267	15137	19421	15418	10613	9809	14302.3
101	Ala-Thr	0.587657	0.717585	18	15	2045.66	0.643055	1	20	12	36247.5	0.74564	0.966303	19	13.6167	29904.3	5706.49	0.190825	28023	30398	27260	24329	30367	29233	24018	26139	29697	42175	41657	31461	35529	35675	20642	20981	29849
102	Ala-Trp	1	1	18	15	425.325	0.999972	1	20	12	5828.25	1	1	19	13.6167	5258.99	715.294	0.136014	5404	6591	5277	4691	5123	4817	5586	4501	5193	6484	6599	5037	5335	6066	3796	3533	5252.06
104	Ala-Val	1	1	24	12	2937.68	0.908793	1	20	12	46535.8	0.995708	1	22	12.1	41210	6577.41	0.159607	40365	46405	39166	34667	42074	39678	41716	39602	41312	53459	51732	39640	43359	42374	30651	26952	40822
106	Allantoin	0.873774	1	24	3	2912.57	0.955212	1	23.3952	5.02e-05	19756	0.985505	1	23.6976	1.48113	15967.7	4883.32	0.305825	11497	17270	19929	30328	7991	11204	21709	24252	6647	10458	12010	18782	21284	14609	12246	15717	15995.8
108	Androstane-3,17-diol	0.0579045	0.108728	24	6	465.453	0.104254	0.37048	20	6	2491	0.036884	0.0878899	22	6.05	1571.25	861.495	0.548286	1619	1050	1318	927	2632	2614	3026	1692	1208	906	1674	1000	1197	1865	817	740	1517.81
115	Arg-Phe	0.0787266	0.137955	24	3	7444.42	0.209085	0.547534	20.9501	5.99999	53127	0.0840605	0.171286	22.4751	4.62305	47583.3	5589.38	0.117465	46057	58584	57165	45847	52702	49578	60882	49346	37124	46582	39647	36756	39105	44059	53709	42026	47448.1
120	Asn-Ala	0.182589	0.274136	18	9	2908.33	0.254833	0.619883	24.7059	6.00003	10301.2	0.189267	0.331658	21.3529	7.93111	8817.03	2323.81	0.26356	6389	6605	5796	5590	10287	10747	8774	11397	10410	10689	12086	7488	11581	8773	5182	4934	8545.5
131	Asn-Val	0.380147	0.496542	24	12	4377.17	0.818346	1	23.2718	12	29599	0.674344	0.898157	23.6359	12.0028	24938.6	5552.01	0.222627	23399	20858	19934	18635	27732	26704	23333	26447	28869	34021	34439	21067	34091	30242	15019	13179	24873.1
138	Asp-Ile	0.301037	0.410161	18	15	4583.82	0.474237	0.917946	20	12	40155	0.420661	0.630482	19	13.6167	32058.3	8158.53	0.254491	32697	27898	26230	26803	27688	26408	20127	29155	37862	42550	48838	31370	47202	41721	23549	21570	31979.2
140	Asp-phe	0.139706	0.220455	18	15	3570.18	0.568799	1	20	12	18254	0.280705	0.452851	19	13.6167	15200.9	4439.2	0.292035	17736	17178	13921	13240	11836	10977	8846	12838	17428	20095	21839	13654	20503	20631	11711	10094	15157.9
142	Asp-Tyr	0.105571	0.17348	18	15	1085.94	0.227716	0.580348	20	12	6022.25	0.113662	0.219812	19	13.6167	4720.52	1434.93	0.303978	4660	4348	3726	4112	3773	3322	2668	4144	6007	6324	7347	4411	6580	6399	4037	3448	4706.62
143	Asp-Val	0.380147	0.496542	24	15	2025.51	0.599847	1	21.5648	12	11977.2	0.565122	0.79167	22.7824	13.4583	9664.97	2696.64	0.279012	8331	8222	7473	7512	8449	9504	6524	9933	11534	12604	14511	9260	15032	11598	7140	6193	9613.75
144	Benthiavalicarb-isopropyl	0.587657	0.717585	18	9	670.691	0.670774	1	25.1282	6	2751.75	0.761146	0.980882	21.5641	7.96552	2336.09	529.577	0.226694	1927	1517	1813	1389	2911	2826	2923	2347	2249	3053	2752	2145	3057	3094	1252	1206	2278.81
148	Betaine aldehyde cation	0.380147	0.496542	24	12	855.422	0.757356	1	28	12	5573.25	0.646385	0.874367	26	12.0714	4935.34	667.855	0.135321	4544	3049	3877	3943	5628	5479	5293	4141	4922	5788	6087	5496	6988	7153	3545	3743	4979.75
166	Cotinine	0.105571	0.17348	18	15	271.883	0.655179	1	20	12	3254.25	0.25393	0.420178	19	13.6167	1234.29	1849.92	1.49877	472	471	813	462	407	378	423	630	2904	917	786	8410	884	829	377	299	1216.38
170	Cyclo(Leu-Pro)	1	1	24	18	2112.84	0.954054	1	20	12	12181.5	0.998928	1	22	14.85	10260.5	3041.78	0.296455	11386	9913	10520	6795	9569	10203	7196	5556	8029	14998	16828	8871	16104	14532	6981	7140	10288.8
171	Cyclo(prolyltyrosyl)	0.962358	1	18	15	164.756	0.864626	1	20.2759	12	1743.75	0.985038	1	19.1379	13.6374	1407.62	372.801	0.264845	1392	1221	1347	1062	1221	1021	1244	796	1002	2258	2399	1316	2387	1926	902	966	1403.75
175	Decanoyl-L-carnitine	1	1	24	18	52.3259	1	1	28	5.99999	658.75	1	1	26	25.5357	632.866	12.5134	0.0197726	543	641	545	489	428	587	1072	548	683	708	525	560	664	954	632	535	632.125
195	D-myo-Inositol, 1-[2-hydroxy-3-[(1-oxo-9,12-octadecadienyl)oxy]propyl hydrogen phosphate], [S-(Z,Z)]-	0.105571	0.17348	18	9	58457.2	0.0381824	0.250499	20	6	180777	0.0262565	0.06672	19	7.6	72864.3	78646.4	1.07935	24690	17880	11487	8946	159762	194829	264783	103733	17721	22766	15748	11524	19282	26114	13677	5525	57404.2
229	Glucuronic acid	0.122638	0.20107	18	6	191.096	0.265612	0.635062	20	6	1062.75	0.144116	0.266107	19	6.01667	884.051	148.96	0.168497	721	836	976	1044	1284	1114	697	1156	608	617	785	710	919	748	836	805	866
234	Glu-Leu	0.235786	0.334301	24	12	2630.79	0.58156	1	20	12	25117.2	0.409572	0.619188	22	12.1	21580	4102.74	0.190118	17907	21214	21647	18074	22041	21069	20342	21789	22628	29144	26886	21811	24440	22760	15343	14313	21338
236	Glu-Met	0.105571	0.17348	18	12	2101.17	0.248357	0.611361	20.3695	12	10427.2	0.12169	0.231511	19.1848	12.0459	8204.13	2199.31	0.268074	6874	6509	6110	6028	7605	7432	6118	8845	10241	10689	12338	8441	10670	8888	5352	5058	7949.88
249	Gly-Gly-Gly	0.235786	0.334301	24	15	242.538	0.276608	0.651286	20.464	12	1002.75	0.243271	0.405608	22.232	13.4659	741.639	315.058	0.424813	641	633	465	552	614	534	471	836	938	1043	1143	887	1114	937	537	395	733.75
251	Gly-Ile	1	1	18	15	2205.82	0.994844	1	20	12	28016	0.999987	1	19	13.6167	24898.3	3477.03	0.139649	26471	27476	24868	20434	24474	23037	21728	23295	26101	29208	34109	22646	29698	28753	19047	16489	24864.6
253	Gly-Phe	0.587657	0.717585	18	15	2122.38	0.971114	1	20	12	17723.2	0.890791	1	19	13.6167	15736.2	2595.42	0.164933	16738	17855	14466	13272	14518	12775	13411	13146	15518	18943	21902	14530	20492	21862	11395	10554	15711.1
259	Gly-Thr	0.0787266	0.137955	18	12	2432.62	0.255236	0.620187	20.464	12	13905.2	0.0986076	0.194875	19.232	12.0495	11387.2	2539.63	0.223025	8507	10300	8930	9424	11094	11054	8437	12347	12981	14392	15779	12469	14069	11933	8342	7468	11095.4
272	His-Ala	0.139706	0.220455	18	15	815.824	0.582791	1	20	12	8273.25	0.285631	0.4596	19	13.6167	6732.66	1572.38	0.233545	6427	7467	5949	6528	6291	6041	5521	6723	7777	8945	9393	6978	7692	6648	4254	4845	6717.44
280	His-Pro	0.587657	0.717585	24	15	3424.87	0.820359	1	22.6735	12	22564.8	0.833834	1	23.3368	13.4682	17162	6659.84	0.388058	14408	12250	13019	9817	19036	17323	16724	12539	13603	27806	31891	16959	28381	22760	7586	9308	17088.1
286	His-Trp	0.873774	1	18	15	691.727	0.751488	1	20	12	9003	0.932832	1	19	13.6167	7115.34	1861.53	0.261621	7646	6599	5775	6080	7167	5986	4972	6203	6953	11211	11258	6590	9095	8850	4466	4706	7097.31
288	His-Val	0.587657	0.717585	18	15	1133.14	0.992748	1	20	12	9964	0.897782	1	19	13.6167	8536.83	1744.32	0.204329	9736	9907	8516	7095	8105	7230	8162	7232	8737	12170	11054	7895	9260	10087	5532	5601	8519.94
294	Ile-Gln	0.235786	0.334301	18	15	6267.79	0.915586	1	20	12	47605	0.546835	0.773032	19	13.6167	40073.9	10356.4	0.258433	43560	44779	40474	37833	37529	34487	22526	35758	37312	56642	54515	41951	46814	52110	27933	25355	39973.6
308	Ile-Val	1	1	18	12	6115.77	0.993041	1	20	12	85449.2	0.999976	1	19	12.0333	78418	8046.98	0.102616	83014	83948	63132	66401	83655	73561	81841	72643	77326	91980	90421	82070	98122	82436	58564	50364	77467.4
327	Leu-Gln	0.873774	1	18	12	5855.2	0.991207	1	20.2759	12	54125.8	0.990605	1	19.1379	12.0426	48009.7	6127.82	0.127637	48310	47128	40125	36448	49355	47525	39356	48914	51886	60805	63452	40360	64195	59117	30322	29457	47297.2
344	Lidocaine	0.139706	0.220455	24	12	1696.35	0.735704	1	24.2975	12	4917.25	0.336627	0.526757	24.1488	12.0005	3415.46	2299.07	0.673135	1274	1065	1674	2557	4270	2108	2608	9775	8155	3085	5335	3094	5654	2899	864	410	3426.69
358	Lys-Trp	0.235786	0.334301	24	18	1854.39	0.381923	0.802	20.3695	12	12519	0.306841	0.488823	22.1848	14.854	10641.6	2393.45	0.224916	10288	10908	9178	8530	10389	8864	8504	8846	12608	13782	12553	11133	14082	13571	9190	8121	10659.2
361	Malic acid	0.235786	0.334301	18	9	2854.24	0.979047	1	25.4179	6	24530.8	0.569267	0.795727	21.7089	7.98948	22501.6	2296.18	0.102045	14332	20518	18657	24197	25890	25162	16548	30523	21016	24224	24885	22521	25972	20331	19566	21932	22267.1
370	Met-Asn	0.873774	1	18	12	254.205	0.960476	1	20	12	2340.25	0.986324	1	19	12.0333	2013.57	336.521	0.167127	1828	1937	1613	1742	2009	1972	1596	2102	2227	2543	2861	1730	2858	2229	1168	1166	1973.81
382	Methylpropionic acid	0.105571	0.17348	24	9	2480.88	0.700934	1	21.6708	5.99999	11309.8	0.266668	0.436384	22.8354	7.44285	7438.6	3129.02	0.420646	3443	4004	4153	14301	7200	4432	15757	17850	9363	6423	7629	5072	5716	5271	3050	2882	7284.12
387	Met-Thr	1	1	24	12	312.895	0.964156	1	20	12	4659.75	0.99935	1	22	12.1	3978.14	746.109	0.187552	3844	3896	3566	2888	4281	3864	3692	3686	3846	5453	5969	3371	5065	4794	2466	2265	3934.12
393	Myristoyl-L-carnitine	0.0787266	0.137955	18	6	29755.1	0.15439	0.457884	20	6	116368	0.0657571	0.140122	19	6.01667	74728.3	43090.6	0.57663	71284	51890	54277	30157	109823	105367	169552	80731	56128	64280	48615	43578	61173	72848	53442	38960	69506.6
396	N,N'-Diacetylcystine	0.122638	0.20107	18	15	41.3657	0.836753	1	20	12	270.25	0.336253	0.526383	19	13.6167	245.284	42.2812	0.172376	237	228	332	206	190	213	199	194	261	218	291	311	369	221	242	206	244.875
411	N-Acetyl-DL-valine	0.0787266	0.137955	18	15	6674.91	0.475333	0.919656	20	12	19776.5	0.16037	0.289758	19	13.6167	15756	6691.5	0.424696	17626	18463	16878	11899	8264	8347	7149	8769	18563	21872	22037	16634	33747	23011	9462	8338	15691.2
412	N-Acetyl-D-phenylalanine	0.0787266	0.137955	18	15	6901.72	0.491611	0.936917	20	12	19107	0.164558	0.295291	19	13.6167	14882.6	7080.12	0.47573	15353	17942	16769	11000	6650	5784	6621	7427	17393	22732	22124	14179	34133	23937	8291	6690	14814.1
413	N-Acetyl-epsilon-caprolactam (double check)	0.139706	0.220455	18	0	1049.35	0.495149	0.940761	20	17.9999	4605.75	0.25395	0.420178	19	18.05	3653.97	1122.28	0.307141	5529	4923	5030	3408	1867	1689	1632	1981	4425	5653	4734	3071	8205	5617	2461	2140	3897.81
414	N-Acetylglucosamine	1	1	18	15	264.458	0.999983	1	28	12	2240.25	1	1	23	14.5119	2183.5	432.329	0.197999	2330	3627	2311	1904	1886	1794	1740	2208	1937	2285	2553	2186	2607	2518	1484	1545	2182.19
415	N-Acetylhistidine	0.105571	0.17348	18	15	1285.87	0.147097	0.441698	20	17.9999	4969.75	0.0802084	0.165079	19	16.4666	4103.97	1139.77	0.277723	4325	4582	5425	4165	2510	2769	2248	3192	3871	4662	5815	5355	6642	5529	3612	4096	4299.88
416	N-Acetylleucine	1	1	18	15	472.347	0.999993	1	20	12	4081.25	1	1	19	13.6167	3630.22	597.543	0.164602	3855	4545	4507	2442	3192	3288	4305	2710	3946	4565	4485	3329	3973	3637	2620	2592	3624.44
417	N-Acetyl-leucine (double check)	0.182589	0.274136	18	0	3487.98	0.479059	0.922227	20	12	14299.2	0.300589	0.480567	19	15.2	11315.3	6561.99	0.579921	16183	14652	16438	10855	5320	4763	4488	6229	14090	17579	15703	9825	24718	17770	7097	5977	11980.4
420	N-Acetylphenylalanine	0.301037	0.410161	18	15	1272.97	0.758026	1	20	17.9999	3873.5	0.565364	0.791729	19	16.4666	2987.78	996.917	0.333665	3363	3766	3631	2311	1618	1914	1830	1242	3074	5013	4579	2711	7550	4866	1669	1409	3159.12
421	Nafadotride	0.182589	0.274136	24	15	389.616	0.288258	0.667821	21.3559	12	1074	0.207605	0.3568	22.678	13.4583	718.581	391.981	0.545493	572	520	491	310	562	409	347	384	1121	1334	1190	651	1596	1044	444	395	710.625
429	N-L-.gamma.-Glutamyl-L-leucine	0.105571	0.17348	24	12	38940.7	0.341422	0.744765	23.7736	12	180108	0.155819	0.283606	23.8868	12.0003	141087	45882	0.325204	96578	121545	100633	94311	149336	143697	160714	149427	157475	205224	203044	154689	183950	187156	69686	77211	140917
430	N-Lauroyl-L-arginine	0.587657	0.717585	18	9	2137.23	0.961969	1	26.3284	6.00001	8667.5	0.887751	1	22.1642	8.06656	7065.01	1589.81	0.225025	6586	4687	5033	2558	10452	8699	7546	7973	9450	8630	7025	4240	10814	9517	4711	3018	6933.69
440	Octanoylcarnitine	0.235786	0.334301	24	15	29.1682	0.817531	1	20.6557	12	386.25	0.510107	0.729687	22.3279	13.4632	341.241	54.0082	0.15827	296	385	291	273	273	281	374	349	446	416	309	374	387	402	300	283	339.938
445	Orthanilic acid	0.873774	1	24	3	95.813	0.928082	1	27.4766	6.3e-05	619	0.98088	1	25.7383	1.60867	521.233	81.3763	0.156123	504	624	707	641	767	577	453	423	325	507	674	286	313	293	565	657	519.75
455	Phe-Asn	1	1	18	9	908.632	0.92749	1	21.7778	12	6783.5	0.997305	1	19.8889	10.4518	5796.97	952.41	0.164295	5562	4864	4414	4289	6934	6346	4230	5487	5396	7758	8670	5310	7876	6674	3236	3162	5638
456	Phe-Gln	0.380147	0.496542	24	12	2029.93	0.794049	1	23.9024	12	12999	0.66342	0.886335	23.9512	12.0001	11220.4	2702.94	0.240896	10646	10718	10004	7818	14425	12667	12135	10823	10955	15779	16243	9019	13298	12610	6774	5543	11216.1
469	Phe-Pro	1	1	24	18	635.512	0.909924	1	20	12	4648.25	0.995816	1	22	14.85	3613.09	1187.03	0.328535	3784	3184	3298	2383	3251	3469	2691	2367	2871	5861	6672	3189	5851	4844	2043	2228	3624.12
485	Pro-Glu b	0.301037	0.410161	24	12	607.051	0.74391	1	23.3952	12	4152.5	0.559045	0.785166	23.6976	12.002	3434.34	823.995	0.239928	3006	2734	3158	2189	3762	4158	3307	3031	3557	4660	4860	3533	4809	4189	1850	2017	3426.25
506	PyroGlu-Met	0.182589	0.274136	24	12	1152.23	0.473313	0.916687	23.2718	12	5780	0.298026	0.477239	23.6359	12.0028	4431.38	1426.08	0.321814	3421	3412	3032	2845	4702	4434	4227	4596	5413	6311	6976	4420	6475	6053	2317	1999	4414.56
507	PyroGlu-Phe	1	1	18	12	2654.48	0.99099	1	21.6708	12	25194.2	0.999959	1	19.8354	12.1036	22161.5	3071.9	0.138614	19843	22235	18369	16772	21093	22394	21165	21538	23724	27423	29234	20396	30434	30564	12910	11359	21840.8
510	PyroGlu-Trp	0.182589	0.274136	24	15	1350.57	0.578871	1	20.0911	12	7962	0.343213	0.532848	22.0456	13.4729	6134.65	2250.02	0.366771	4818	6050	4539	4573	5440	5327	5375	5738	7060	8867	9199	6722	8509	8699	3001	3281	6074.88
511	PyroGlu-Val	0.380147	0.496542	24	12	8323.71	0.19579	0.523637	24.5682	12	25222.8	0.267789	0.437597	24.2841	12.0016	18954.5	8858.18	0.46734	10652	13003	11221	10345	23683	24365	22270	22775	20074	29176	31144	20497	25802	24313	7588	7689	19037.3
515	Riboflavin	0.182589	0.274136	18	12	3025.36	0.489231	0.935215	20	12	14635.5	0.305095	0.486937	19	12.0333	11154.1	3798.23	0.340524	8883	13545	8492	6993	8901	9210	8858	12968	11711	15077	18762	12992	13059	9601	7329	4905	10705.4
516	Ribose A	0.235786	0.334301	24	3	1442.5	0.587386	1	23.2718	6.63e-05	10510.5	0.412294	0.621599	23.6359	1.47728	9060.2	1607.02	0.177372	10938	8428	12711	9965	10017	8872	13292	6985	8582	8433	7122	5908	7890	10037	7326	8638	9071.5
523	Ser-Ala	0.0579045	0.108728	18	12	1528.76	0.436388	0.870766	20	12	13946	0.118212	0.226587	19	12.0333	11797.1	2519.37	0.213559	10156	11091	10390	10293	11918	11797	10188	13348	12854	14542	16920	11468	13082	10938	7636	7370	11499.4
531	Ser-Leu	0.235786	0.334301	24	9	2581.47	0.609408	1	25.7143	12	23918.5	0.422463	0.632526	24.8571	10.4607	21897.4	2995.8	0.136811	21005	25238	22080	18686	24762	22685	25124	23087	22340	26997	26571	19766	22145	22438	15648	13544	22007.2
533	Ser-Met	0.235786	0.334301	18	15	4894.24	0.999354	1	20	12	36420.2	0.576237	0.796954	19	13.6167	32538.1	6338.11	0.19479	34227	40298	34897	33095	30351	28238	24302	31526	31958	39918	41659	32146	34344	35761	25362	21546	32476.8
538	Ser-Thr	0.182589	0.274136	24	12	1714.03	0.695523	1	24.1644	12	10818	0.389062	0.593749	24.0822	12.0001	9506.61	1722.38	0.181178	8124	8476	8370	7500	10155	10616	8395	11429	11908	10947	12016	8401	12698	9582	6917	6646	9511.25
540	Ser-Tyr	0.105571	0.17348	18	15	3970.76	0.759521	1	20	12	21427.5	0.282521	0.455271	19	13.6167	19449.4	4466.45	0.229645	20209	25348	21855	21045	15314	14501	15615	15961	18992	22613	24173	19932	20649	23095	16515	14681	19406.1
541	Ser-Val	0.380147	0.496542	18	12	15898.2	0.81784	1	20	12	222154	0.674119	0.898134	19	12.0333	192124	32044.8	0.166792	168113	187633	184731	160928	184279	186693	167694	190161	189240	240966	261783	196627	204359	239583	131494	119133	188339
544	Stanozolol	0.873774	1	18	9	190.919	0.588049	1	20	5.99999	1887.75	0.855965	1	19	7.6	1429.91	355.969	0.248944	1153	1131	1384	898	2247	2711	1783	810	1244	1303	1214	1123	1389	1249	1160	960	1359.94
558	Thr-Gln	0.235786	0.334301	18	15	1266.43	0.590504	1	20	12	10421.5	0.413745	0.622161	19	13.6167	8426.33	2144.3	0.254477	7613	9338	7463	7915	7097	6774	6318	8529	8941	12135	11643	8967	10281	10058	5590	5827	8405.56
562	Thr-Leu	1	1	18	12	1164.43	0.999787	1	20	12	25457	1	1	19	12.0333	23456.1	2499.97	0.106581	24255	25540	23270	20477	24305	22271	21701	23037	24191	27388	29788	20461	26106	26028	17484	14271	23160.8
566	Thr-Thr	0.380147	0.496542	24	12	1947.55	0.573028	1	24.9858	12	11829	0.54982	0.77649	24.4929	12.0049	10432.4	1972.36	0.189061	8283	9014	8362	8532	11052	10929	11093	12722	12406	12593	13355	8962	14079	11168	7516	7366	10464.5
572	Thymidine	0.873774	1	18	0	2714.76	0.925194	1	28	12	14778.2	0.980348	1	23	4.92857	15808.2	4703.02	0.297506	19384	32476	18206	15027	10424	12084	16070	15517	12382	16998	18561	11172	16172	19531	9661	10817	15905.1
598	Tyr-Thr	0.380147	0.496542	24	12	1952.32	0.710427	1	20	12	24686.5	0.623608	0.852342	22	12.1	21107.8	4042.76	0.19153	18802	19713	20064	18365	21761	20647	18629	21564	20775	27236	29474	21261	23058	24476	14125	13958	20869.2
606	unknown1001	0.587657	0.717585	18	12	576.469	0.708986	1	20.3695	12	4833.75	0.781423	1	19.1848	12.0459	4176.1	661.532	0.158409	3873	3562	3943	3152	4608	4029	3575	3787	3774	5346	5526	4689	5021	4824	2898	2987	4099.62
610	unknown1005	1	1	18	15	310.243	0.999902	1	28	12	5116.75	1	1	23	14.5119	4788.3	779.726	0.16284	5291	6156	4601	4659	4438	4710	4384	5127	4170	5124	6169	5004	5250	4812	3239	3441	4785.94
613	unknown1008	0.380147	0.496542	24	3	498.864	0.248188	0.611293	28	12	4103.25	0.317081	0.502365	26	7.19643	4439.16	641.6	0.144532	5603	6726	5203	5060	4121	4015	4276	3468	4315	4181	3991	3926	3796	4595	3596	3315	4386.69
619	unknown1013	0.0579045	0.108728	18	0	1974.6	0.0542591	0.280695	28	6.63e-05	7830.98	0.0212481	0.0561026	23	2.72e-05	5534.4	1118.48	0.202096	7847	8483	7861	7133	5256	4800	4307	4908	5365	4426	4969	3905	4335	4791	5448	5363	5574.81
634	unknown1027	0.587657	0.717585	24	6	746.705	0.90556	1	24.2975	6	6657	0.867852	1	24.1488	6.00023	5861.95	676.126	0.115342	6239	7870	4649	5491	7225	7885	5025	6493	5026	5302	7497	4963	6294	5672	4316	3897	5865.25
639	unknown1031	0.0579045	0.108728	24	9	4832.37	0.180577	0.501217	21.6708	6	35447.5	0.0581424	0.12688	22.8354	7.44286	30540.7	4589.13	0.150263	26853	33706	26688	25680	32646	36529	33855	38760	29850	24679	36367	33190	26162	25854	26314	27893	30314.1
653	unknown1044	0.301037	0.410161	18	0	1024.6	0.15526	0.459053	28	12	4197.75	0.189909	0.332513	23	4.92857	4442.64	999.55	0.22499	5622	6145	5344	5920	3931	3787	4228	4078	3920	4446	4349	4076	3438	3984	3588	4556	4463.25
657	unknown1048	0.161148	0.253826	18	15	848.175	0.998409	1	20	12	4915	0.454843	0.668966	19	13.6167	4473.99	999.168	0.223328	4985	5926	6019	3819	3464	3605	2991	4698	5212	4578	4698	5172	4864	4625	3496	3277	4464.31
686	unknown1074	1	1	24	12	304.056	0.999816	1	20	12	6928	1	1	22	12.1	6289.31	760.679	0.120948	6309	7690	5695	5431	6653	5878	6260	5783	5880	8103	8061	5668	7192	6802	4143	4363	6244.44
690	unknown1078	0.475047	0.600921	18	15	1436.49	0.996412	1	20	12	14307.8	0.827373	1	19	13.6167	12816.4	2004.88	0.156431	13449	15377	12840	11336	12021	11370	11451	11544	12158	16599	15749	12725	14809	14614	9645	9065	12797
697	unknown1084	1	1	18	15	421.789	1	1	28	12	9492.25	1	1	23	14.5119	8889.42	1190.85	0.133963	8861	10869	9108	8165	9199	8389	8911	8311	8534	10845	10426	8164	10030	9564	6853	5944	8885.81
700	unknown1087	0.380147	0.496542	18	12	846.937	0.844233	1	20	12	12898	0.68568	0.910456	19	12.0333	11540.8	1679.24	0.145504	10969	12276	10702	10097	12251	10641	11840	11327	12173	14556	14110	10753	12163	12051	7995	7575	11342.4
701	unknown1088	0.105571	0.17348	18	12	1087.53	0.352027	0.760996	23.2718	12	6429.75	0.159522	0.288766	20.6359	12.199	5342.28	1098.36	0.205598	3901	4467	4189	4124	5660	5160	5244	4652	5423	6364	6653	7279	7194	6371	3520	3747	5246.75
707	unknown1093	0.587657	0.717585	18	15	333.224	0.817615	1	20	12	5115.25	0.832655	1	19	13.6167	4421.66	674.715	0.152593	3738	4463	4405	4035	4400	3946	3780	3935	4381	6005	5511	4564	5593	5387	3332	3167	4415.12
708	unknown1094	0.235786	0.334301	18	15	605.283	0.785332	1	20	12	9662.5	0.497457	0.715135	19	13.6167	8434.97	1229.91	0.14581	7578	8606	8487	7756	8420	7808	7441	7432	8684	11184	10138	8644	10176	9645	6447	6323	8423.06
712	unknown1098	0.301037	0.410161	18	15	571.873	0.873764	1	20	12	5791.5	0.614311	0.842294	19	13.6167	5190.62	787.037	0.151627	4941	6220	4357	5347	5182	4527	3695	4921	5221	5971	6552	5422	6138	5789	4148	4497	5183
718	unknown1102	0.0787266	0.137955	24	3	304.409	0.223253	0.571896	28	6.63e-05	4595.99	0.0886044	0.179185	26	1.62503	3620.32	290.647	0.0802821	3264	5323	5150	4647	3517	3394	2806	3833	3227	3120	3353	3063	3119	3139	3410	3472	3614.81
730	unknown1113	0.719948	0.857599	24	12	842.518	0.932375	1	24.2975	12	5710.75	0.938824	1	24.1488	12.0004	5007.94	882.568	0.176234	4579	4476	4277	3699	6140	6164	3626	5252	4669	6467	6481	5226	6648	6094	3120	3278	5012.25
734	unknown1117	0.105571	0.17348	18	15	1901.76	0.690851	1	20	12	12679	0.263889	0.433639	19	13.6167	11161.4	2288.62	0.205047	11660	12498	12081	9915	10216	8991	8453	9010	10714	14211	14939	10852	12447	14098	9251	8892	11139.2
745	unknown1127	0.719948	0.857599	24	12	765.62	0.745982	1	20.8511	12	6010.75	0.870926	1	22.4255	12.0594	5009.32	1149.87	0.229547	4186	4711	4212	3829	5811	5202	3917	5260	4709	7053	7139	5142	6067	6008	3274	2745	4954.06
759	unknown114	0.105571	0.17348	18	3	1061.54	0.749556	1	27.4766	6.3e-05	3443.24	0.279859	0.451654	22.7383	1.89489	4634.39	8102.96	1.74844	10002	2454	85	1232	5081	2581	1561	66	73	1283	385	50	18442	525	5660	27587	4816.69
765	unknown1145	0.475047	0.600921	18	15	255.973	0.872593	1	20	12	5160.75	0.779563	1	19	13.6167	4583.7	737.366	0.160867	4625	4611	4581	4308	4621	4234	2633	4347	4629	5793	5730	4491	6040	5231	3825	3526	4576.56
770	unknown115	0.653803	0.797904	18	3	3259.76	0.978149	1	20	6	4114.25	0.925408	1	19	4.43333	3015.91	2420.63	0.802621	5928	9262	12	95	10496	5886	63	12	2	345	11	30	3386	71	9170	2970	2983.69
775	unknown1154	0.0787266	0.137955	24	3	691.02	0.0807129	0.3233	28	6.63e-05	5769.24	0.0384981	0.0907934	26	1.62503	4767.57	158.176	0.0331774	6110	6086	5447	5434	5322	4490	4809	4552	4030	4787	4559	4747	3682	4353	4027	3894	4770.56
778	unknown1157	1	1	18	6	731.679	0.999936	1	20	6	3834	1	1	19	6.01667	3143.3	697.18	0.221799	2590	1253	2234	4856	4248	3266	845	6977	2498	1695	1347	3276	3848	1427	4276	4305	3058.81
780	unknown1159	0.235786	0.334301	18	12	2195.39	0.389995	0.811474	23.2718	12	8660	0.311403	0.494816	20.6359	12.199	6725.12	2045.19	0.304112	4422	4859	4467	4742	7746	6587	4629	7552	6486	9453	10662	8039	9445	8335	3761	3571	6547.25
801	unknown1178	0.380147	0.496542	24	12	1144.1	0.803736	1	23.3952	12	7511.75	0.667809	0.891373	23.6976	12.0019	6391.94	1515.37	0.237076	5363	6148	5223	5383	6502	8540	4778	7769	5843	8462	9131	6611	7479	7394	3759	3648	6377.06
805	unknown1181	0.235786	0.334301	24	15	1839.18	0.807838	1	20	12	20201.2	0.506331	0.725244	22	13.475	16748.3	4467.07	0.266717	15594	16050	13978	14773	17208	16664	10270	17410	17068	23713	22429	17595	21719	19759	11719	10102	16628.2
837	unknown121	0.139706	0.220455	18	6	39450.2	0.0204619	0.240485	20	6	81387	0.019603	0.052428	19	6.01667	42571	39847.6	0.936026	25397	28018	21591	15173	82210	83736	83923	75679	28037	25850	27109	12049	29872	29602	21060	14571	37742.3
838	unknown1210	0.719948	0.857599	24	12	1421.99	0.84526	1	20	12	22321.2	0.910799	1	22	12.1	19378.8	3329.01	0.171786	18254	19841	18975	16555	20762	18647	17177	18567	19168	25335	24945	19837	20392	22198	14508	11758	19182.4
861	unknown1231	0.0787266	0.137955	18	15	1128.9	0.587556	1	20	12	10620.5	0.188428	0.330588	19	13.6167	8964.28	1965.39	0.219247	8888	9549	9165	8236	8515	7941	6361	8192	8876	11744	11906	9956	9848	10187	6779	6981	8945.25
866	unknown1236	0.587657	0.717585	18	15	1635.89	0.610838	1	20	12	12084.5	0.726734	0.954721	19	13.6167	9530.44	2704.5	0.283775	9054	8259	10878	6800	8974	9448	6001	6156	8090	13834	16053	10361	12263	11311	7276	7310	9504.25
870	unknown124	0.0683156	0.127889	18	9	9331.51	0.381836	0.802	20	6.00002	51686.2	0.121202	0.230698	19	7.60001	38541.7	10758	0.279126	35629	35837	28663	15863	55759	53247	59023	38716	42003	39334	34731	16711	39334	39196	31544	17240	36426.9
876	unknown1245	0.587657	0.717585	18	0	822.719	0.812196	1	28	12	3186.5	0.830311	1	23	4.92857	3013.74	1216.09	0.403516	3472	5167	3914	4586	2583	2454	1474	2847	2764	3446	3127	3409	2452	2226	2393	2307	3038.81
893	unknown1260	0.380147	0.496542	18	15	2876.86	0.852189	1	20	12	17442.5	0.689104	0.913881	19	13.6167	14662.6	3847.22	0.262383	16021	17156	13017	13504	12306	11455	8709	13327	12283	20344	22416	14727	19331	18788	10462	10160	14625.4
899	unknown1266	0.105571	0.17348	18	15	1432.6	0.64037	1	20	12	8307	0.249736	0.41463	19	13.6167	7026.68	1806.57	0.257101	7590	8730	5986	6504	6166	5519	4058	6324	7165	9229	9427	7407	8803	8490	5915	4834	7009.19
913	unknown1279	1	1	18	15	628.618	0.999983	1	20	12	8344.5	1	1	19	13.6167	7673.12	987.071	0.12864	8006	8891	7202	7764	7478	6651	5270	8630	6958	9249	10023	7148	9171	8976	5575	5625	7663.56
921	unknown1286	0.105571	0.17348	18	15	2054.5	0.418106	0.84836	20	12	11997.5	0.181873	0.320909	19	13.6167	9490.34	3030.03	0.319275	9225	9940	7492	9030	7218	6533	4790	8860	10089	13481	13305	11115	14185	13376	6237	6500	9461
925	unknown129	0.0579045	0.108728	18	6	1950.55	0.108836	0.375609	20	6	12114.8	0.0382341	0.0903677	19	6.01667	7446.24	4775.9	0.641384	5960	5318	5292	3759	14590	15543	12260	6066	5843	5786	4810	3711	6176	5344	5579	3843	6867.5
932	unknown1296	0.796861	0.948436	24	21	148.492	0.706876	1	23.9024	17.9999	1994.5	0.886592	1	23.9512	19.497	1718.02	231.759	0.134899	1984	1435	1584	1932	1738	1435	778	1795	1600	1622	1898	1717	2080	1560	1849	2489	1718.5
937	unknown130	0.0787266	0.137955	18	9	2882.52	0.0839679	0.330488	20	5.99999	12760.5	0.0397893	0.0928217	19	7.6	7716.23	3919.13	0.507908	6204	5584	3937	3176	16505	12521	14133	7883	8057	6468	4737	2541	6034	5418	4559	3376	6945.81
938	unknown1300	1	1	18	9	1956.56	0.992327	1	26.1721	12	10350.8	0.99997	1	22.0861	10.5848	9325.65	1000.58	0.107293	7811	7748	7100	7895	11610	10028	5489	11002	6265	12131	13083	9924	13740	10723	7398	5978	9245.31
980	unknown1339	0.0787266	0.137955	18	15	2895.6	0.998951	1	20	12	12648.5	0.278622	0.45032	19	13.6167	11445.2	3222.38	0.281549	14091	16939	13236	12687	9172	8168	7791	10638	11061	14195	14080	11258	11314	12609	8235	7150	11414
988	unknown1346	0.301037	0.410161	18	15	1944.01	0.932086	1	20	12	18068.8	0.637184	0.865164	19	13.6167	15709.7	3136.39	0.199647	16792	17691	16555	14130	15518	13742	11488	14266	15887	20578	19944	15866	17852	16998	12946	10616	15679.3
998	unknown1355	0.380147	0.496542	18	15	1250.52	0.992536	1	20	12	8912	0.745069	0.966303	19	13.6167	8062.03	1519.54	0.188481	8554	10311	8338	8016	7304	6429	6723	7218	8314	9943	9580	7811	9036	9402	6036	5742	8047.31
1002	unknown1359	0.380147	0.496542	18	15	1112.28	0.805374	1	20	12	8356	0.668546	0.892082	19	13.6167	7108.5	1600.33	0.225129	7317	7635	7114	6257	6610	5631	4987	6134	7289	9673	9617	6845	9798	8603	5134	4844	7093
1022	unknown1377	0.139706	0.220455	18	9	778.525	0.545015	1	24.1644	6	4917	0.272219	0.443291	21.0822	7.88789	4473.05	595.92	0.133224	3673	3724	3929	4059	5637	5369	3746	4916	3844	4709	5299	5076	4921	4351	3762	3336	4396.94
1032	unknown1386	0.301037	0.410161	24	3	504.167	0.898157	1	21.6708	5.82e-05	4445.5	0.624016	0.852439	22.8354	1.42724	3914.15	778.101	0.198792	4050	4377	3961	5394	5023	4376	1906	4561	2726	2952	3553	3820	4786	3151	4338	3984	3934.88
1033	unknown1387	0.235786	0.334301	18	15	914.643	0.798926	1	20	12	6379.25	0.502835	0.720713	19	13.6167	5337.65	1357.67	0.254358	5939	5959	5456	4832	4484	4216	4669	4597	5339	6586	7705	5887	6048	5989	3730	3756	5324.5
1038	unknown1391	0.139706	0.220455	24	3	374.413	0.848942	1	22.5575	6.63e-05	3580	0.37146	0.572596	23.2788	1.45496	3240.31	427.717	0.131999	3226	3278	3627	4189	3745	3629	2105	3933	2448	2824	3136	3007	3609	2980	3134	3078	3246.75
1053	unknown1404	0.139706	0.220455	24	15	566.039	0.345481	0.750218	20	12	4763.5	0.194561	0.339619	22	13.475	3832.1	1179.5	0.307795	3094	3472	3273	3492	3759	3402	2588	4126	4194	5109	5507	4244	4887	4103	2962	2594	3800.38
1058	unknown1409	0.587657	0.717585	18	15	697.914	0.922138	1	20	12	6535	0.873909	1	19	13.6167	5761.8	1089.78	0.189138	5711	6104	5406	6315	5551	4951	3481	5505	5097	7624	7219	6200	7641	6347	4784	4084	5751.25
1062	unknown1412	0.0579045	0.108728	24	0	1049.88	0.112693	0.379919	25.4179	6.63e-05	2739.49	0.0393618	0.0922774	24.7089	3.22e-05	1683.72	1046.04	0.621268	2427	2735	2738	3058	1529	939	587	1471	1005	922	1294	643	896	994	2534	2809	1661.31
1085	unknown1433	0.719948	0.857599	18	3	470.226	0.885664	1	22.2166	6.01e-05	3591.25	0.924562	1	20.1083	1.67572	3197.81	504.185	0.157666	3129	3324	3735	4177	4004	3258	1668	3571	2203	2512	3604	2805	3795	3375	3144	3801	3256.56
1097	unknown1444	0.105571	0.17348	18	15	900.854	0.394585	0.818664	20	12	8401	0.174053	0.309508	19	13.6167	6459.83	1911.91	0.295969	5458	6094	5772	5376	5257	4435	5225	5867	6121	9969	10385	7129	7967	9038	4395	4573	6441.31
1177	unknown1516	1	1	18	15	838.629	0.994521	1	20	12	10905.2	0.999985	1	19	13.6167	10372.9	911.974	0.087919	9481	11556	10728	10574	10050	9455	8896	9475	9875	11766	11436	10544	12751	12515	8134	8589	10364.1
1191	unknown1529	0.380147	0.496542	18	6	1964.34	0.990647	1	20	6	11305.2	0.744369	0.966303	19	6.01667	9660.63	1996	0.206612	5564	8457	6549	10332	12451	11686	7199	13885	7617	8909	9918	8706	11570	9372	8997	9488	9418.75
1192	unknown153	0.873774	1	18	9	852.417	0.999746	1	20	6.00002	7477.25	0.991645	1	19	7.60001	6194.14	918.622	0.148305	5837	5286	5311	3255	6727	7690	6119	9373	4880	6140	6691	3770	9860	9361	3078	2839	6013.56
1198	unknown1535	0.380147	0.496542	18	6	14531.4	0.803462	1	20	6	69645.8	0.667685	0.891373	19	6.01667	55369.9	16508.8	0.298155	30058	46614	34056	55333	76695	70889	43019	87980	42091	48268	55534	47283	64298	52890	49152	49750	53369.4
1220	unknown1555	0.0787266	0.137955	24	15	1287.29	0.222303	0.570244	21.7778	12	6096.25	0.0883019	0.178751	22.8889	13.4589	4806.81	1459.85	0.303705	3825	4072	3403	3868	4507	4507	2424	4957	5949	6674	6061	5701	6707	6315	3903	3625	4781.12
1226	unknown1560	0.139706	0.220455	24	0	481.893	0.332083	0.731394	24.1644	6.3e-05	2839.5	0.188851	0.331063	24.0822	3.14e-05	2270.79	601.015	0.264672	2413	2839	2491	3615	2693	2408	1190	2495	1863	1765	1585	1661	2623	1619	2674	2373	2269.19
1236	unknown157	0.873774	1	24	15	2962.25	0.930239	1	28	18	16030.5	0.981273	1	26	16.4821	13200.2	291.772	0.0221035	11196	9785	10336	4284	12651	13259	10022	13012	13926	17500	21703	9507	25991	24706	8394	5031	13206.4
1270	unknown160	1	1	18	9	10142.9	0.975843	1	28	6	32828.5	0.999706	1	23	8.21429	26629.1	6316.38	0.237199	20716	16708	16363	8971	37807	37477	26012	30018	31055	34362	32279	15659	47422	43672	14375	8570	26341.6
1272	unknown1601	0.0579045	0.108728	24	15	1142.86	0.438448	0.872865	22.5575	12	6879.75	0.118651	0.227025	23.2788	13.4664	5556.77	1561.32	0.280976	3919	4635	3976	5092	6120	5601	2549	6370	6511	7091	7507	6410	7527	6552	4593	4156	5538.06
1279	unknown1608	0.475047	0.600921	18	9	2693.9	0.892436	1	20	5.99999	41692.5	0.787758	1	19	7.6	37735	4032.32	0.106859	24434	36575	31158	40863	44168	40400	33031	49171	34748	36649	38725	38446	40800	35321	32817	33771	36942.3
1282	unknown1610	1	1	18	6	263.044	1	1	20	5.99999	8659.5	1	1	19	6.01666	8520.54	173.623	0.0203769	6517	9390	7620	9774	9055	8763	6836	9984	7873	8481	8670	8404	9576	9075	7735	8239	8499.5
1296	unknown1623	0.301037	0.410161	18	12	1188.29	0.449369	0.886052	20	12	7052	0.405889	0.61451	19	12.0333	5758.18	1293.48	0.224633	4513	5674	4408	4942	5185	5409	3925	6408	6480	7629	8284	5815	7312	5849	3993	3860	5605.38
1300	unknown1627	0.182589	0.274136	24	12	1436.31	0.400211	0.826182	22.2166	12	7627.5	0.264256	0.433913	23.1083	12.0179	6107.65	1634.89	0.267678	4605	5167	4353	5140	6432	6987	3602	7459	6084	8383	8656	7387	8028	5780	4587	4332	6061.38
1301	unknown1628	0.182589	0.274136	18	6	1010.28	0.46192	0.902986	20	6.00001	5407	0.292908	0.469911	19	6.01667	4580.91	660.442	0.144173	3640	5101	4312	5784	6168	5548	3395	6517	3861	3505	3147	3600	4436	3318	4565	5117	4500.88
1302	unknown1629	0.182589	0.274136	24	12	1238.32	0.38788	0.809017	23.3952	12	5279	0.258331	0.426122	23.6976	12.002	3997.44	1216.61	0.304348	2649	2679	2387	3400	4404	3794	1656	5574	5377	5392	5513	4834	6168	4354	2614	2973	3985.5
1306	unknown1632	0.587657	0.717585	24	12	806.102	0.869444	1	21.1511	12	8785.75	0.854034	1	22.5755	12.048	7727.77	1134.74	0.14684	6002	7325	7131	7092	8449	7840	5573	8794	7361	9966	10217	7599	9281	8305	6200	5712	7677.94
1311	unknown1637	0.235786	0.334301	24	15	579.297	0.528648	0.976972	20.1831	12	5249.25	0.384198	0.588668	22.0915	13.471	4226.25	1265.7	0.299485	3293	3703	3390	3793	4299	4082	2697	4920	4536	5733	6183	4545	5623	4554	2976	2762	4193.06
1313	unknown1639	0.475047	0.600921	18	6	545.533	0.966364	1	20	6.00001	3148.5	0.816479	1	19	6.01667	2707.13	362.61	0.133947	2264	2019	2684	3858	4036	2977	1429	4152	2308	1743	1458	2187	2431	1621	3472	3972	2663.19
1333	unknown1657	0.0787266	0.137955	18	15	960.958	0.106317	0.371371	20	12	5866.5	0.0484044	0.10939	19	13.6167	4118.21	1693.67	0.411263	3476	4040	3456	3520	3138	2907	2940	4232	6623	6438	5867	4538	4328	4628	2875	2623	4101.81
1334	unknown1658	0.873774	1	18	9	1944.9	0.989248	1	26.1721	6	29005.5	0.990357	1	22.0861	8.05315	27245.2	2047.84	0.0751635	17721	26000	23577	29803	28784	27843	23499	35896	26194	30090	26805	28717	30506	25490	25966	26214	27069.1
1335	unknown1659	1	1	18	9	386.787	0.985067	1	26.3284	12	5568.5	0.999888	1	22.1642	10.5921	5319.75	306.013	0.0575238	3609	5178	4654	5826	5566	5211	4494	6615	5135	6143	5143	5853	5810	5108	5084	5310	5296.19
1347	unknown167	1	1	18	6	1347.75	1	1	20	5.99999	12845.5	1	1	19	6.01666	11804.7	1310.97	0.111055	11664	11186	11696	6649	11540	13538	9885	16419	9742	12534	12504	7381	19517	17590	8089	6399	11645.8
1352	unknown1674	1	1	24	12	1057.65	0.999714	1	25.1282	6	20193.2	1	1	24.5641	9.07368	19077.1	1136.92	0.0595963	12504	19443	17511	21587	20626	19971	15680	24496	19351	20026	20021	19012	21612	18484	16899	18482	19106.6
1366	unknown1687	0.105571	0.17348	18	15	2413	0.5813	1	20	12	12335.2	0.232639	0.389832	19	13.6167	11270	2459.33	0.218219	9155	10871	13449	16044	8914	8638	5992	10591	12850	11215	10689	14587	12303	10787	11084	12770	11246.2
1381	unknown170	0.873774	1	24	15	6169.15	0.932814	1	28	12	33048	0.981736	1	26	13.6964	27426.1	5084.77	0.185399	24632	21361	22922	9853	25679	25712	21413	26889	30531	39233	41336	21092	52911	50322	17382	10649	27619.8
1403	unknown172	0.0787266	0.137955	18	9	2837.97	0.61859	1	20	6	10655.8	0.195874	0.341438	19	7.6	7685.37	2514.25	0.327148	5499	4867	5251	2799	10186	11307	11059	10071	6104	7636	7663	4266	10515	10351	4023	3461	7191.12
1412	unknown1728	0.182589	0.274136	24	6	12653	0.425073	0.857674	20.5594	6.00001	68543.5	0.275995	0.448169	22.2797	6.03599	45826.3	18737.7	0.408884	30947	49036	51783	50824	49062	77685	113599	33828	19175	54742	37385	28455	17746	37599	32978	32253	44818.6
1425	unknown174	0.587657	0.717585	24	15	1569.07	0.966144	1	28	17.9999	9346.5	0.889145	1	26	16.4821	7799.35	932.449	0.119555	6532	6184	6265	2581	7684	8255	7847	6950	8538	10423	10670	5791	14854	14518	5052	2962	7819.12
1436	unknown175	0.182589	0.274136	18	9	14736.3	0.667397	1	20	6	48271	0.378359	0.580544	19	7.6	36137.4	13178.4	0.364676	26803	22914	20527	10288	55651	49341	50398	37694	40991	43829	37219	18867	51701	43999	16633	9894	33546.8
1445	unknown1758	0.0579045	0.108728	18	15	22142	0.591719	1	20	12	69067.8	0.149856	0.275298	19	13.6167	62199.9	21613.8	0.34749	50698	78080	104895	76467	48768	36131	44078	24728	48997	75880	71064	80330	66368	60076	51127	74162	61990.6
1589	unknown1888	0.0787266	0.137955	24	12	54875.9	0.564868	1	23.2718	12	195462	0.182903	0.322332	23.6359	12.0029	128291	87205.5	0.679746	76148	59700	59962	95421	141833	106957	74019	292123	323480	125779	214047	118544	171659	102246	42218	32068	127263
1593	unknown1891	0.0787266	0.137955	24	12	31572.3	0.552329	1	23.2718	12	104779	0.179819	0.317932	23.6359	12.0029	65832.7	50827.1	0.772065	33918	27080	27839	45941	73786	53751	31921	164442	177195	63797	116806	61317	86766	48496	17287	13388	65233.1
1599	unknown1897	0.301037	0.410161	18	6	2173.29	0.587861	1	20	6	10975.5	0.483439	0.701505	19	6.01667	7519.32	3605.19	0.479458	6773	6681	4732	3698	17120	12212	8673	5897	6424	6772	4772	3608	5827	6683	3750	9697	7082.44
1607	unknown1903	0.182589	0.274136	24	6	573.11	0.305102	0.694216	20	6	3430.25	0.216573	0.369052	22	6.05	2878.95	313.483	0.108888	3187	2561	3188	3110	3909	4027	3399	2386	2180	2547	2226	2309	3463	2311	2772	2177	2859.5
1608	unknown1904	0.0579045	0.108728	24	9	1412.98	0.0203601	0.240485	20	6	8729.25	0.00912872	0.0276609	22	7.425	4774.43	2673.42	0.559944	3581	3628	2384	3150	9636	8689	8375	8217	4385	3942	2910	1963	3316	3762	2150	2713	4550.06
1636	unknown193	0.475047	0.600921	18	9	4282.59	0.820104	1	25.5652	5.99999	13238.8	0.756839	0.976203	21.7826	8.00177	10130.4	3239.68	0.319797	7517	6115	6025	2993	14812	13805	13623	10715	11893	13992	11103	6091	15914	14236	5020	3102	9809.75
1646	unknown1939	1	1	18	6	634.982	1	1	28	6	5332.5	1	1	23	6.29762	4867.24	380.64	0.0782046	4853	3930	4512	3121	5174	6036	4570	5550	3901	5622	5305	3086	8162	7349	3445	3050	4854.12
1656	unknown1948	0.873774	1	24	15	1459.82	0.89332	1	28	17.9999	7752.75	0.973939	1	26	16.4821	5938.57	636.702	0.107215	4886	4203	4727	2022	5518	5191	3936	5230	6211	9331	8339	4196	12983	12249	3690	2089	5925.06
1658	unknown195	0.380147	0.496542	24	12	1718.98	0.787092	1	23.7736	12	18867.2	0.660241	0.885287	23.8868	12.0003	17034.9	2347.72	0.137818	15812	17992	15990	11466	16411	16401	19540	18714	17836	20157	20322	17154	20405	17904	12797	13518	17026.2
1673	unknown1963	1	1	18	6	518.309	1	1	28	6.00002	8899.25	1	1	23	6.29763	8661.2	161.756	0.018676	8896	7128	9092	5105	9599	9147	6231	10620	7006	10754	9442	5468	15785	14052	6036	4129	8655.62
1677	unknown1967	1	1	24	18	5534.52	0.912711	1	28	18	28045.2	0.996074	1	26	18.1071	22337	454.744	0.0203583	19878	15981	18607	7316	21728	18849	14474	19336	23482	37557	32124	15492	47925	42241	14523	7492	22312.8
1678	unknown1968	1	1	24	18	1645.44	0.967774	1	28	17.9999	9958.75	0.999475	1	26	18.1071	8042.92	290.652	0.0361377	7559	5723	6857	2802	8353	7807	6899	6487	8097	13009	10087	5419	15697	15515	5639	2984	8058.38
1679	unknown1969	0.587657	0.717585	18	9	11118.7	0.976119	1	27.1385	6.00001	35055.2	0.892433	1	22.5692	8.13721	27420.6	7611.17	0.277571	20877	16446	17182	6853	44956	37118	32084	26063	31537	42435	29200	12938	48672	42398	14598	7482	26927.4
1683	unknown1972	1	1	18	9	2908.15	0.987165	1	28	6	9231.75	0.999917	1	23	8.21428	7557.6	1753.13	0.231969	6159	4277	4557	2077	11549	9912	7893	7573	8932	11078	8331	3950	15014	12198	3872	2273	7477.81
1709	unknown1996	0.587657	0.717585	18	9	1671.95	0.999482	1	28	5.99999	8977	0.899901	1	23	8.21428	7571.79	1021.33	0.134886	7070	5520	6181	4268	9267	8623	8302	9716	6852	9506	7607	5559	11260	11274	5241	4159	7525.31
1710	unknown1997	0.719948	0.857599	24	15	1976.54	0.918089	1	28	17.9999	10234	0.934645	1	26	16.4821	8023.93	106.523	0.0132757	7082	5525	6076	2857	8209	7431	5684	7847	8539	12324	10285	5624	16048	16207	5395	3286	8026.19
1726	unknown201	0.105571	0.17348	18	9	2193.8	0.0945597	0.350851	24.9858	12	4651.5	0.0559722	0.123025	21.4929	10.5345	3477.04	1725.09	0.496138	1062	1532	927	1484	4126	4627	4673	4620	4172	4524	5520	4390	4333	4826	951	968	3295.94
1742	unknown2024	0.105571	0.17348	18	9	10136	0.416541	0.846373	24.1644	12	23395.8	0.181357	0.320129	21.0822	10.5052	17954.1	8561.03	0.476828	9709	8113	7596	11209	27107	15786	11297	38366	36094	19474	24522	13493	21716	14935	5747	5431	16912.2
1755	unknown2036	0.719948	0.857599	24	15	1759.99	0.636632	1	20	12	11900.2	0.815913	1	22	13.475	8578.16	4274.87	0.498344	4480	5884	9132	9292	4782	5379	7043	8552	5504	11385	11996	18716	6054	8767	6732	11713	8463.19
1758	unknown2039	0.139706	0.220455	24	9	2114.96	0.719909	1	22.5575	5.99999	9047.5	0.331583	0.521334	23.2788	7.46068	5977.65	2497	0.417723	2647	3452	3501	12084	5662	3719	12063	14746	7707	4980	6526	4214	4271	4295	2168	2381	5901
1759	unknown204	0.0579045	0.108728	24	9	2414.77	0.104382	0.37048	24.8451	6	5902.5	0.0369219	0.0878899	24.4225	7.5282	4390.66	2160.6	0.492089	2027	2499	1894	2724	5651	5380	6725	5854	5432	5594	6548	5495	5176	6189	1832	1856	4429.75
1760	unknown2040	0.105571	0.17348	24	9	23246.5	0.694817	1	21.4599	6	114746	0.264984	0.434715	22.7299	7.43941	73541.3	31785.8	0.432217	32720	39599	39126	147782	71522	43892	155522	188048	90363	60127	72954	47017	55223	49175	27901	28339	71831.9
1792	unknown207	1	1	24	6	719.128	0.989434	1	28	4.8e-05	10629.7	0.999944	1	26	3.25002	9811.88	126.996	0.012943	9899	12545	11359	8716	9464	8977	12268	9308	8036	10545	11125	8508	10281	9534	7608	8784	9809.81
1802	unknown2079	0.0787266	0.137955	24	12	7541.12	0.260313	0.627244	23.7736	12	25512	0.100165	0.197233	23.8868	12.0003	16482.6	9244.06	0.560838	10328	7850	5925	6705	19124	22388	10440	14744	19045	20238	35043	27722	25326	26342	6854	5101	16448.4
1803	unknown208	0.235786	0.334301	18	9	2994.07	0.904319	1	20	6.00002	11442	0.542746	0.767753	19	7.60001	9006.48	2414.02	0.268031	6906	5923	6256	3843	9862	11968	11375	12563	7922	11104	9496	5121	12716	12258	5111	4087	8531.94
1814	unknown209	0.719948	0.857599	24	15	2533.92	0.92976	1	28	17.9999	13366	0.938071	1	26	16.4821	11036.4	1435.41	0.130062	9059	7727	7693	4191	10777	11418	10049	11157	11339	17566	15167	7462	21800	20224	7014	4426	11066.8
1824	unknown2099	1	1	18	0	677.408	0.979916	1	28	17.9999	4245	0.999797	1	23	18.8928	4597	668.652	0.145454	6028	8465	4880	3995	4019	5064	3668	3940	3097	5136	5688	3043	5923	5414	2930	2713	4625.19
1832	unknown2105	0.0787266	0.137955	18	6	4139.05	0.15165	0.452234	20	6	25761	0.0648037	0.138568	19	6.01667	9842.3	16461	1.67247	1378	1368	1373	1011	46967	22334	4783	28960	6339	1480	1214	427	3577	2148	1401	801	7847.56
1839	unknown2111	0.105571	0.17348	18	15	1449.92	0.65284	1	20	17.9999	6590.5	0.25327	0.419533	19	16.4666	5965.28	1167.08	0.195646	7386	6145	7675	6509	5042	3741	5203	5091	6708	3366	7687	7739	6521	7427	6203	6211	6165.88
1871	unknown2140	0.0683156	0.127889	24	3	1360.12	0.122127	0.397168	21.1511	6	5435.75	0.0482762	0.109157	22.5755	4.61301	4232.6	1256.63	0.296893	4385	4456	6414	4470	6317	5618	6218	3590	3605	3111	3104	2014	2954	2873	3665	4470	4204
1891	unknown2159	0.0787266	0.137955	24	3	1524.17	0.322483	0.71749	21.0501	6.63e-05	13654.2	0.11865	0.227025	22.5251	1.40785	12000.1	2325.22	0.193767	13974	16070	13877	10696	13202	11836	13759	11788	9753	9757	10564	9231	14975	12863	11869	9118	12083.2
1900	unknown2167	0.122638	0.20107	24	9	449.19	0.421643	0.853776	20	6	10429.2	0.204879	0.353578	22	7.425	3539.35	4540.13	1.28276	832	1146	841	217	6916	8327	25427	1047	1487	859	536	219	724	709	1027	219	3158.31
1901	unknown2168	0.0787266	0.137955	24	9	786.303	0.494975	0.940761	20	6	17181	0.165419	0.296589	22	7.425	5644.08	7643.87	1.35432	984	1707	986	200	9933	13017	44356	1418	2348	1170	605	203	912	809	1220	173	5002.56
1902	unknown2169	0.235786	0.334301	24	6	2993.71	0.511904	0.959266	20	6	82581.2	0.375914	0.578417	22	6.05	27498.7	51825.8	1.88466	6073	8679	4764	1145	48638	61684	214065	5938	10250	5078	2665	852	4648	4807	8164	1093	24283.9
1905	unknown2171	1	1	24	6	2807.04	0.998261	1	20.3695	5.99999	33631.8	0.999998	1	22.1848	6.04044	27954.1	4583.58	0.163968	32273	29974	27948	21481	23212	42754	57062	11499	26325	25248	24259	23982	11674	34718	29639	21067	27694.7
1906	unknown2172	0.0787266	0.137955	24	3	1384.16	0.247184	0.610208	21.7778	6	7141.25	0.0961203	0.191093	22.8889	4.58362	5971.03	1150.87	0.192742	6452	8062	7254	5477	7336	6626	9641	4962	4143	4483	5136	5056	5497	5596	5481	4000	5950.12
1911	unknown2177	1	1	18	9	1272.09	0.9806	1	25.4179	12	8126.5	0.999811	1	21.7089	10.5517	6962.6	919.188	0.132018	6784	5469	5705	3490	8159	7411	6520	5237	6634	9518	9900	6454	11681	10070	3560	3397	6874.31
1914	unknown218	0.235786	0.334301	18	9	1227.71	0.742524	1	20	6	5310.75	0.480154	0.698846	19	7.6	3492.57	1708.63	0.48922	2341	2031	1870	806	8164	1213	8437	3429	4177	3585	3122	1290	3600	3114	2229	1099	3156.69
1918	unknown2183	0.139706	0.220455	18	15	501.692	0.371736	0.788641	20	12	5829.25	0.205543	0.354582	19	13.6167	4812.27	989.494	0.205619	4474	4371	5592	3852	5006	4425	4361	3741	4856	6099	6652	5710	5106	4760	3800	4038	4802.69
1921	unknown2186	0.0579045	0.108728	24	0	1431.18	0.170132	0.483697	24.7059	6.63e-05	3511.49	0.0553662	0.122065	24.3529	3.27e-05	2097.04	1579	0.752963	3731	2916	4393	3006	1868	1643	1479	1211	954	873	773	875	848	719	3719	4264	2079.5
1922	unknown2187	0.0579045	0.108728	24	6	2992.12	0.112923	0.379919	20	5.99998	21209.8	0.0394287	0.0922845	22	6.04999	15896.3	4277.79	0.269106	16274	17500	14818	12084	20593	20461	27578	16207	10684	13079	12620	14069	14469	15401	13746	10512	15630.9
1923	unknown2188	0.873774	1	18	6	41662.4	0.673386	1	20	5.99999	183984	0.90045	1	19	6.01666	124620	64239.4	0.515482	123040	77622	76877	49988	222496	196334	260580	56526	111312	102909	82610	69565	132933	141822	97212	67543	116836
1932	unknown2196	0.0579045	0.108728	24	9	1765.65	0.199443	0.53011	20	6	12680.2	0.0630695	0.135395	22	7.425	7361.65	3635.93	0.493901	6083	5855	4944	3328	9955	10328	21489	8949	5624	6242	4943	4875	4834	6957	4919	3579	7056.5
1934	unknown2198	0.0579045	0.108728	24	0	729.027	0.171946	0.487894	26.0177	6.63e-05	2592.49	0.0558511	0.122884	25.0088	3.19e-05	1658.46	821.328	0.495235	2457	2378	3388	2147	1304	1213	1431	1210	1020	1075	1157	947	781	829	2157	2655	1634.31
1939	unknown2201	0.0579045	0.108728	24	0	1023.54	0.47688	0.921004	23.3952	6.63e-05	2684.99	0.126731	0.239615	23.6976	3.36e-05	1760.63	1235.17	0.701549	4339	3567	2070	764	1476	1495	2367	501	1199	954	506	264	3186	2582	2480	622	1773.25
1941	unknown2203	0.105571	0.17348	18	9	2595.79	0.210184	0.549576	20	6	28624.2	0.106689	0.207905	19	7.6	11552.9	12602.9	1.09088	2560	3479	1907	1076	26787	25590	57475	4645	4880	3595	2373	859	2817	2478	3625	1062	9075.5
1942	unknown2204	0.182589	0.274136	18	6	1115.11	0.0897244	0.341638	20	6	6365.25	0.0837405	0.170875	19	6.01667	2736.49	3719.11	1.35908	900	1420	827	429	7852	6947	9051	1611	1820	945	866	303	1131	921	1165	385	2285.81
1944	unknown2206	0.0787266	0.137955	18	9	791.076	0.18028	0.501036	20	6	8784.75	0.0745837	0.155712	19	7.6	3739.47	3723.23	0.995658	968	1311	1015	635	8629	8173	16596	1741	1792	1387	961	602	1236	1153	1286	636	3007.56
1950	unknown2211	0.719948	0.857599	18	15	4257.67	0.99517	1	20	12	21209.8	0.955355	1	19	13.6167	17361.3	5392.82	0.310623	17517	23381	20670	12930	13056	14691	12099	15287	14238	29356	27154	14091	22154	19393	10025	10903	17309.1
1956	unknown2217	0.587657	0.717585	18	6	1590.64	0.994921	1	20	6.00002	5498	0.898468	1	19	6.01667	4760.07	625.185	0.131339	8113	5034	3625	1400	6721	5496	7795	1980	4299	3172	1926	675	9531	8447	5351	1384	4684.31
1966	unknown2226	0.587657	0.717585	24	0	1935.35	0.604417	1	23.9024	6.63e-05	5741.74	0.722848	0.951637	23.9512	3.32e-05	4387.9	2323.64	0.529556	8726	6980	5280	1981	3829	3416	3629	2169	3843	3607	2697	1230	7463	8328	5017	2071	4391.62
1983	unknown2241	0.0579045	0.108728	18	15	7357.09	0.583486	1	20	12	15805.8	0.148245	0.272917	19	13.6167	13225.8	7095.1	0.536458	14449	17442	14233	25529	4909	6743	5514	6162	13291	8387	22664	18881	11662	15182	9855	15611	13157.1
1997	unknown2254	0.475047	0.600921	24	0	20575.4	0.68876	1	24.0327	6.63e-05	116820	0.692735	0.918415	24.0163	3.31e-05	99571.1	24981.9	0.250895	146911	115596	129648	75125	88644	91800	85974	80021	77503	77866	101133	75934	158829	122112	95032	70796	99557.8
1998	unknown2255	0.0579045	0.108728	18	15	5575.71	0.052782	0.278526	20	12	11690.2	0.020754	0.0550739	19	13.6167	9125.18	5330.02	0.5841	8703	10105	13335	11502	4673	2843	2606	2334	8324	12719	12730	12988	9927	9117	10104	13167	9073.56
2007	unknown2263	0.0787266	0.137955	18	15	2393.38	0.0634803	0.295116	20	12	4684.5	0.0314788	0.0770946	19	13.6167	3707.37	2103.3	0.567331	3056	4154	5359	4968	1762	1134	1163	800	3060	5279	5634	4765	4889	4083	3437	5449	3687
2021	unknown2276	0.235786	0.334301	24	0	5893.74	0.547992	1	24.1644	6.63e-05	16494.9	0.393613	0.599066	24.0822	3.3e-05	10835.1	7760.01	0.716194	28620	20477	12865	4018	7792	7882	7499	3877	9876	7184	4282	1519	23329	18134	11987	3689	10814.4
2022	unknown2277	0.0787266	0.137955	18	15	2913.81	0.0398972	0.253306	20	12	5440.75	0.0212431	0.0561026	19	13.6167	4021.44	2846.55	0.707843	3600	4661	6103	4609	1118	567	564	406	3066	6480	6677	5540	5052	4824	4453	6182	3993.88
2030	unknown2284	0.873774	1	18	15	1023.18	0.999975	1	20	12	8270.75	0.991673	1	19	13.6167	7448.3	1308.53	0.175682	7825	9054	8415	6881	7113	6556	7239	5647	8107	8868	9009	7099	8910	8887	4739	4621	7435.62
2032	unknown2286	0.182589	0.274136	18	0	27771.3	0.942112	1	20	12	73836.2	0.474798	0.693148	19	15.2	65240	32667.8	0.500732	51197	120982	124398	93000	44706	35667	58982	20957	40374	77860	69827	107284	57740	66057	57734	70054	68551.2
2036	unknown229	0.587657	0.717585	18	9	1907.42	0.679468	1	25.2722	6.00005	5770.75	0.765869	0.986088	21.6361	7.97741	4713.71	1455.23	0.308724	3070	3504	3172	1527	5875	5282	7160	4766	5482	7135	5897	3140	6497	6634	2322	1508	4560.69
2039	unknown2292	0.182589	0.274136	18	15	10580.1	0.990193	1	20	12	27121.5	0.490031	0.708932	19	13.6167	24921.2	9739.56	0.390814	21904	45254	41973	31043	16849	14143	23017	8873	13732	35552	24003	35199	20333	21974	19539	23842	24826.9
2040	unknown2293	0.182589	0.274136	18	0	811.759	0.834015	1	20	12	4445.5	0.43888	0.652721	19	15.2	4140.68	1089.68	0.263165	3656	5192	6511	4888	3973	3078	3614	2324	3474	4457	4782	5069	4372	3903	3821	4904	4251.12
2044	unknown2297	0.182589	0.274136	24	12	1518.69	0.498799	0.943556	23.6461	12	7757.25	0.309297	0.492012	23.8231	12.0007	6215.91	1892.96	0.304535	4881	4859	5239	4121	7293	6516	6684	6309	7010	8506	9011	6502	8276	8088	2988	2997	6205
2072	unknown2321	0.587657	0.717585	18	0	394.742	0.881952	1	28	12	1168.5	0.858918	1	23	4.92857	1268.92	586.098	0.461889	1371	1930	3458	1267	1180	976	1035	804	1353	840	649	1832	433	957	1122	1289	1281
2085	unknown2333	0.182589	0.274136	18	6	1262.54	0.697872	1	20	6.00002	4747.25	0.389947	0.594531	19	6.01667	3682.77	834.677	0.226644	4349	5081	4129	1777	4480	5409	7247	1853	2661	2552	1572	735	4544	4609	4802	1506	3581.62
2090	unknown2338	0.0787266	0.137955	18	9	1895.93	0.129758	0.410412	20	6	11974	0.0570416	0.124825	19	7.6	6431.15	4124.75	0.64137	3701	3842	3551	1940	11397	10695	19588	6216	3616	4544	3683	2769	4578	5134	2510	2161	5620.31
2110	unknown2356	0.301037	0.410161	18	12	11320.2	0.918387	1	22.7907	12	42117.5	0.631913	0.85963	20.3953	12.1678	29123.5	16974.6	0.582848	10042	5839	49849	9234	37079	15658	8501	70531	70003	22059	41087	35321	36850	21427	4130	3235	27552.8
2169	unknown2409	0.235786	0.334301	18	3	304.056	0.98229	1	20	6	1031.5	0.570387	0.796702	19	4.43333	738.262	470.406	0.637181	809	797	845	414	760	653	2502	211	350	364	370	210	1201	1129	742	355	732
2194	unknown2431	0.182589	0.274136	18	15	3239.96	0.236234	0.593068	20	12	11668.2	0.178723	0.316252	19	13.6167	9717.13	3452.79	0.35533	9256	11277	12936	8350	9287	6369	4422	4155	11407	13720	12393	9153	13132	11777	8699	8606	9683.69
2195	unknown2432	0.873774	1	18	12	3880.6	0.999948	1	20	12	34852.5	0.991669	1	19	12.0333	31334.5	4359.76	0.139136	25160	24514	29111	47861	28236	29777	32010	28843	27775	35595	40280	35760	33451	29401	25235	20103	30819.5
2229	unknown2463	0.0787266	0.137955	18	15	2216.78	0.0581306	0.286613	20	12	5267	0.0292289	0.0723619	19	13.6167	4497.04	1889.02	0.420057	4563	6203	5881	4520	2804	2137	1967	1920	3677	5976	5554	5861	5510	5230	4836	5021	4478.75
2240	unknown2473	0.182589	0.274136	18	15	3696.05	0.960703	1	20	12	14313.2	0.48074	0.699229	19	13.6167	12771	4066.87	0.318445	13639	10921	26856	8133	7337	6351	10003	8410	17315	12562	15116	12260	14102	23538	9157	8006	12731.6
2241	unknown2474	0.139706	0.220455	18	15	2282.54	0.865802	1	20	12	7799.25	0.376459	0.578654	19	13.6167	6883.7	2363.19	0.343303	7245	6045	14068	4540	3365	3435	5174	4075	9422	6984	8163	6628	7742	13153	5148	4586	6860.81
2298	unknown2525	0.0787266	0.137955	24	9	943.634	0.183276	0.504826	20	6	9999.75	0.0755853	0.157273	22	7.425	8022.5	1389.6	0.173213	7386	7460	8059	5666	11430	9350	10512	8707	6283	8113	7484	7562	7496	8922	6505	5559	7905.88
2299	unknown2526	0.0579045	0.108728	18	15	7681.65	0.0330255	0.244028	20	12	20693.8	0.0138824	0.0389991	19	13.6167	15539	8782.94	0.565219	14681	16425	21181	16291	8887	6139	5559	4997	15858	23181	20820	22916	16727	17763	18490	17348	15453.9
2331	unknown2555	1	1	24	18	1231.07	0.93905	1	20.464	12	9505.5	0.998104	1	22.232	14.8554	7510.9	1613.92	0.214878	7580	6481	6033	5035	8631	7535	5695	5902	7155	11178	13435	6254	11051	10190	4169	4029	7522.06
2340	unknown2563	1	1	24	18	898.379	0.986196	1	20	12	9699.5	0.999904	1	22	14.85	7930.79	1877.73	0.236765	9421	7780	6969	5486	8706	7471	6223	6213	7454	11418	13402	6524	10119	10721	4799	4466	7948.25
2347	unknown257	0.139706	0.220455	24	6	733.447	0.767923	1	20	6	6760.25	0.346771	0.537793	22	6.05	3808.22	2728.1	0.71637	3050	3369	3062	2565	5138	1376	16006	4521	3138	3303	2655	1604	1049	2861	2442	2085	3639
2355	unknown2577	0.182589	0.274136	24	12	3871.06	0.353765	0.762849	24.4321	12	14848.5	0.241556	0.403215	24.2161	12.001	10868.2	4567.39	0.420251	7109	7540	6554	5237	12321	12050	11334	11773	12934	16805	18983	10672	16549	15385	4875	4290	10900.7
2356	unknown2578	0.873774	1	24	15	3462.7	0.54833	1	22.2166	12	13025.2	0.831656	1	23.1083	13.4622	10031.5	3094.51	0.30848	8738	7323	7595	6874	8317	7340	7332	7351	12548	14387	13754	11412	18448	17366	5739	5260	9986.5
2365	unknown2586	1	1	18	15	1293.65	1	1	20	12	23550.2	1	1	19	13.6167	22727	1573.59	0.0692386	25273	23586	25429	20480	25531	22450	17657	20878	23920	22310	28177	19794	25110	21134	23216	18443	22711.8
2369	unknown259	0.475047	0.600921	24	6	810.344	0.612315	1	20	6	8267.5	0.65007	0.878802	22	6.05	4323.8	3713.7	0.858898	3102	3577	2912	2358	6545	1741	18721	6063	3251	3671	2667	1776	1184	3178	2803	1946	4093.44
2390	unknown2608	0.182589	0.274136	18	6	2988.23	0.279319	0.65503	20	5.99999	11711.5	0.202774	0.350783	19	6.01666	8208.83	3769.36	0.459184	6587	6507	6252	3779	13632	12545	10272	10397	6238	7182	6094	6044	8211	11389	5291	3613	7752.06
2392	unknown261	0.0579045	0.108728	18	0	5093.82	0.341109	0.744765	20	12	18321.5	0.0972679	0.192932	19	15.2	14992.9	8891.85	0.593071	21963	22647	21439	14580	6672	6585	7371	7072	16522	21627	20464	14673	29887	22505	10762	9538	15894.2
2395	unknown2612	0.0787266	0.137955	24	3	1209.15	0.105483	0.371371	28	6.63e-05	8292.73	0.0480902	0.10885	26	1.62503	5929.79	302.437	0.0510031	8423	9593	7505	7650	6249	4710	4520	6217	5965	4849	5703	3805	4577	5238	5283	4498	5924.06
2400	unknown2617	1	1	24	18	320.319	0.999992	1	28	17.9999	5231.75	1	1	26	18.1071	4727.46	276.738	0.0585383	4420	4471	4749	4530	2787	3759	4654	6882	2702	4140	5857	5526	4791	5753	4567	5816	4712.75
2412	unknown2628	0.105571	0.17348	18	6	28322.5	0.0278555	0.240485	20	6	73122	0.0200825	0.053545	19	6.01667	29216.3	44972.7	1.5393	11479	7205	4983	3653	78306	83241	86783	44158	6950	10031	5860	4555	9982	14257	6655	2166	23766.5
2413	unknown2629	0.105571	0.17348	18	9	6224.84	0.025897	0.240485	20	6	18392.8	0.0188698	0.0507492	19	7.6	7802.55	7695.69	0.986304	3429	2076	1567	1072	19158	20732	21440	12241	2386	3192	2002	1380	3124	4177	1953	707	6289.75
2416	unknown2631	0.182589	0.274136	18	0	726.729	0.192333	0.518234	28	17.9999	1789	0.152729	0.27939	23	18.8928	2029.5	487.795	0.240353	3202	2974	2934	2563	2075	1632	1288	1825	2148	1749	2176	1079	1736	1743	1987	1690	2050.06
2419	unknown2634	0.0579045	0.108728	18	0	2271.23	0.0942453	0.350432	28	17.9999	5356.25	0.0338938	0.081989	23	18.8928	6064.22	1881.79	0.31031	10647	10199	8272	8154	6032	4364	4025	5072	5798	5171	5161	3977	4973	5793	5898	4761	6143.56
2423	unknown2638	0.380147	0.496542	18	9	8361.36	0.408722	0.835978	24.2975	12	32442.5	0.444669	0.658938	21.1488	10.5096	26409.3	6880.1	0.260518	19377	18999	18672	15476	32050	29433	25712	26532	24739	40045	39526	25460	36197	29544	13184	14501	25590.4
2425	unknown264	0.235786	0.334301	18	12	822.365	0.729248	1	20	12	3964.75	0.474671	0.693148	19	12.0333	3161.47	887.002	0.280566	2479	2863	1759	3622	2651	1141	4786	3452	4191	4220	3487	3961	2377	2876	2510	2532	3056.69
2427	unknown2641	0.105571	0.17348	24	15	3608.37	0.32174	0.71749	24.9858	12	14473.2	0.148853	0.273921	24.4929	13.5357	10589.6	4876.98	0.460542	6316	6772	6723	5063	12685	10140	10850	9526	11597	17343	15622	13331	16808	16828	5639	4893	10633.5
2431	unknown2645	0.380147	0.496542	24	9	2149.25	0.980931	1	20	6	10734.2	0.740744	0.966303	22	7.425	8064.79	2556.26	0.316966	3895	4753	5311	11040	5426	7629	10326	19556	4455	6081	8531	13745	3513	4412	4647	12284	7850.25
2452	unknown2664	0.587657	0.717585	24	15	1204.91	0.700668	1	20.3695	12	7341.25	0.777114	0.998784	22.1848	13.4674	5664.3	2015.27	0.355784	5398	4702	4675	3756	5201	4787	4125	4578	5631	8194	9529	6011	9340	7632	3224	3025	5613
2471	unknown2681	0.0579045	0.108728	18	12	976.868	0.689756	1	20	12	8284	0.168562	0.301476	19	12.0333	6891.37	1669.65	0.242282	7380	6957	6467	4551	6572	7160	5349	7825	7872	8465	10059	6740	6551	7180	4369	3609	6694.12
2474	unknown2684	0.0787266	0.137955	24	18	382.545	0.354401	0.76346	20	17.9999	5155.75	0.12776	0.241362	22	18.15	4715.1	520.591	0.110409	5233	4990	5211	4284	3916	4235	4175	3801	4769	4186	5439	5250	5644	5940	4815	4224	4757
2519	unknown2724	0.105571	0.17348	18	15	53921.8	0.156926	0.461409	20	12	203435	0.0844963	0.172012	19	13.6167	185025	47649	0.257527	230925	211009	211611	180888	142938	132566	129587	110341	173023	228996	226670	185050	220704	229370	165897	173446	184564
2525	unknown273	0.139706	0.220455	24	9	48940.6	0.577382	1	25.4179	12	202178	0.283732	0.457013	24.7089	10.4656	168011	42463.8	0.252744	129326	135597	234021	148950	180037	105600	232635	240538	223742	199265	192237	193468	130779	115505	127660	119418	169299
2537	unknown2740	1	1	18	6	30.4056	1	1	23.52	12	651.25	1	1	20.76	8.75592	612.477	41.3894	0.067577	605	713	583	428	688	587	968	259	1063	554	478	510	542	662	704	357	606.312
2580	unknown278	0.182589	0.274136	18	9	817.946	0.509447	0.957424	20	6.00002	4357	0.313935	0.497926	19	7.60001	2231.26	1786.86	0.800833	1037	892	827	366	5659	431	9072	2266	2036	1747	1352	738	666	1585	935	471	1880
2593	unknown2791	0.0579045	0.108728	18	0	2592.96	0.0906064	0.343543	28	6.63e-05	9867.23	0.0327918	0.0799034	23	2.72e-05	6876.51	1426.7	0.207475	10368	10669	9247	9185	6594	5549	4827	6471	7180	4970	6524	4621	5750	6029	7197	5668	6928.06
2595	unknown2793	0.235786	0.334301	24	12	1492.35	0.650535	1	24.1644	12	10142.8	0.440956	0.655006	24.0822	12.0001	8779.68	1743.45	0.198578	8140	7368	7245	6679	9783	9694	8889	9120	9157	10225	11023	10166	11560	10651	5803	5047	8784.38
2596	unknown2794	0.105571	0.17348	24	12	3195.77	0.314172	0.70705	24.0327	12	12336	0.146141	0.269159	24.0163	12	8760.8	3998.26	0.456381	5924	5420	5193	4219	10937	9158	8815	8683	9634	14273	16104	9333	12812	12520	4108	3074	8762.94
2607	unknown2803	1	1	24	18	841.811	0.948446	1	20	12	7985.75	0.998648	1	22	14.85	6401.81	2184.81	0.34128	7024	6006	6413	5021	5941	5885	4235	4738	5785	9459	11426	5273	10054	7689	3977	3828	6422.12
2634	unknown2828	0.873774	1	24	12	2087.03	0.986956	1	26.6465	12	11704.5	0.990063	1	25.3233	12.0328	10396.2	1831.3	0.176151	7930	7654	8725	7730	7903	9157	13841	15106	9030	10806	11299	15683	16020	14871	6003	5871	10476.8
2663	unknown2854	1	1	18	15	1466.89	0.999997	1	20	12	24282.8	1	1	19	13.6167	22312	2294.64	0.102844	23502	24291	23426	20062	23280	20672	21274	21135	23132	27411	27832	18756	25217	26066	16602	13978	22289.8
2668	unknown2859	1	1	18	12	537.224	0.997558	1	20	12	6114.5	0.999997	1	19	12.0333	5464.9	643.521	0.117755	5963	4970	6052	4265	5415	5394	4387	4484	5519	6624	7730	4585	7125	6166	4099	3444	5388.88
2670	unknown2860	1	1	18	12	727.613	0.999484	1	20	12	12299	1	1	19	12.0333	11242.4	1168.27	0.103916	11472	11695	10441	9218	11704	10323	10929	10864	11491	13741	14517	9447	13872	13239	7818	6899	11104.4
2672	unknown2862	0.719948	0.857599	18	15	532.451	0.980925	1	20	12	5433.5	0.951862	1	19	13.6167	4878.91	707.096	0.144929	5338	5048	5140	4202	4778	4196	4409	4231	5096	5620	6587	4431	5513	5837	3952	3575	4872.06
2674	unknown2864	0.105571	0.17348	24	0	633.744	0.0930641	0.347312	28	6.63e-05	6750.99	0.0552435	0.121857	26	3.08e-05	5359.22	822.461	0.153467	6993	7257	6847	5907	4889	4967	4432	5223	5456	4128	5152	4261	4737	4629	5159	5036	5317.06
2688	unknown2877	1	1	18	12	1565.89	0.98977	1	20	12	22270.8	0.999947	1	19	12.0333	19995.7	2250.83	0.112566	20580	20807	18911	15444	19050	17644	18568	19000	20331	24861	26077	17814	24602	24192	14408	13388	19729.8
2707	unknown2894	1	1	18	15	862.847	0.999948	1	20	12	12278.5	1	1	19	13.6167	11535.3	945.703	0.081983	12111	13212	10914	9346	10944	10083	11297	10304	11442	13590	13732	10350	15548	14887	8788	7871	11526.2
2711	unknown2898	1	1	24	18	490.732	0.999378	1	21.995	17.9999	5941.75	1	1	22.9975	18.0342	5570.09	245.792	0.0441272	6155	6062	5085	4240	5129	4914	5558	4820	5684	6894	6157	4800	7986	7275	4415	4091	5579.06
2712	unknown2899	1	1	18	12	693.141	0.999962	1	20	12	9956.5	1	1	19	12.0333	9163.86	807.764	0.0881467	10024	9517	8883	7309	9506	8394	8135	8373	9393	11307	11355	7771	11949	11040	6101	6038	9068.44
2717	unknown2902	1	1	18	12	610.763	0.999987	1	20	12	13628.8	1	1	19	12.0333	12697	1141.05	0.0898674	13250	14453	11629	10212	13047	12222	12626	12497	13126	14654	15719	11016	15657	14815	8585	7487	12562.2
2737	unknown2920	0.587657	0.717585	18	15	466.337	0.884849	1	20.0911	12	5655.5	0.860034	1	19.0456	13.6234	4973.98	677.659	0.136241	4816	5168	4695	3886	4430	4588	4323	4482	5490	6110	6229	4793	6931	6199	3733	3603	4967.25
2741	unknown2924	0.873774	1	18	15	1515.68	0.975639	1	20	12	21019	0.988542	1	19	13.6167	18465.3	2526.25	0.136811	20242	18295	18672	14682	17179	18162	17740	16533	21699	22273	23145	16959	23465	20317	12954	12736	18440.8
2757	unknown2939	1	1	18	12	2010.3	0.939405	1	20	12	15143	0.998126	1	19	12.0333	13614.7	1206.64	0.0886277	15480	13855	12843	10606	12064	11218	11244	11658	15540	17419	15870	11743	18577	17787	10317	9333	13472.1
2772	unknown2952	0.235786	0.334301	24	12	1750.09	0.427633	0.860033	24.5682	12	8312	0.332166	0.521872	24.2841	12.0017	6725.67	2026.21	0.301266	5393	4923	5015	4387	7256	7641	6829	8125	7390	9768	9933	6157	9349	8100	3974	3674	6744.62
2778	unknown2958	0.475047	0.600921	24	12	3027.48	0.833165	1	22.6735	12	21216.5	0.762639	0.982513	23.3368	12.0097	17995.1	3931.89	0.218498	16592	16954	14849	12948	21781	18530	15192	19563	18961	23682	25736	16487	21419	22983	10787	10120	17911.5
2788	unknown2967	0.105571	0.17348	18	12	12613	0.247108	0.610208	21.3559	12	51732	0.12121	0.230698	19.678	12.0879	39388.7	12028.3	0.305374	30149	29006	26760	26872	37522	36030	27085	41641	50894	53834	61832	40368	52242	49301	23773	22241	38096.9
2794	unknown2972	0.105571	0.17348	18	12	4865.96	0.414974	0.845273	22.6735	12	25615.2	0.18084	0.319347	20.3368	12.1606	20878.4	4764.51	0.228203	15859	17117	15801	15266	20343	20267	16755	22729	25401	26059	30085	20916	29037	24779	13687	12799	20431.2
2797	unknown2975	0.587657	0.717585	24	15	814.233	0.498412	0.943237	20	12	7251.5	0.652554	0.881334	22	13.475	5960.68	1635.64	0.274406	5047	5225	5764	5146	5616	4963	5338	5587	6954	8678	7785	5589	7231	7339	4190	4215	5916.69
2830	unknown3003	0.182589	0.274136	24	12	1070.21	0.423686	0.855333	24.1644	12	5807.75	0.275347	0.447878	24.0822	12.0001	4971.86	1190.09	0.239365	4826	3954	4011	3492	5954	5719	5353	5067	6348	6261	5838	4784	6555	5200	2960	3279	4975.06
2832	unknown3005	0.0787266	0.137955	24	12	5599.23	0.247141	0.610208	23.9024	12	27421.8	0.0961072	0.191093	23.9512	12	22211.8	6469.19	0.291251	19780	15476	17319	15668	24543	24211	25886	21640	30213	28771	27183	23520	29689	24319	13292	13713	22201.4
2838	unknown3010	0.587657	0.717585	18	12	1706.6	0.787903	1	21.4599	12	13423.2	0.819536	1	19.7299	12.093	11311.1	2136.21	0.188859	10122	10350	9258	7644	11689	11004	9815	10980	13178	16308	14628	9579	15020	13810	7037	6918	11083.8
2839	unknown3011	0.475047	0.600921	18	12	1388.93	0.756216	1	20	12	8898	0.727015	0.9548	19	12.0333	7361.55	1491.29	0.202578	7213	6600	5846	5089	7009	6790	5890	7271	9258	10368	10029	5937	9964	8597	4720	4385	7185.38
2840	unknown3012	0.719948	0.857599	18	12	394.566	0.909223	1	20.5594	12	3960	0.931971	1	19.2797	12.0531	3456.47	507.738	0.146895	3494	3138	3024	2469	3679	3465	2947	3223	3583	4539	4547	3171	4466	4029	2385	2217	3398.5
2867	unknown3037	1	1	24	18	565.685	0.954447	1	20	12	5122.75	0.998946	1	22	14.85	4426.04	842.225	0.190288	4947	4075	3879	3709	4156	4139	3248	4228	4752	5683	6047	4009	6207	5772	3192	2899	4433.88
2871	unknown3040	0.0787266	0.137955	18	0	345.422	0.118909	0.392435	27.6489	17.9999	567.75	0.0530895	0.118007	22.8245	18.8418	634.799	255.323	0.40221	1026	1277	1000	908	511	438	415	482	655	505	474	398	462	395	770	644	647.5
2886	unknown3054	0.0579045	0.108728	18	15	930.906	0.477116	0.921049	20	12	6820.75	0.12678	0.239615	19	13.6167	5132.89	1841.04	0.358675	4777	4585	4773	4759	4390	3995	3396	3684	5502	8901	7926	4954	7149	6717	3279	3054	5115.06
2889	unknown3057	0.0579045	0.108728	18	15	1055	0.448526	0.886052	20	12	8335	0.120788	0.230401	19	13.6167	6385.35	2075.06	0.324972	6089	5890	5511	5828	5800	5056	4144	4863	6714	10593	9518	6515	8355	8698	4119	4151	6365.25
2900	unknown3067	0.301037	0.410161	18	12	1106.45	0.565759	1	20	12	10507.2	0.47179	0.690385	19	12.0333	9049.2	1436.01	0.158689	8114	7940	8566	7170	8877	8991	7886	8264	10169	11090	12041	8729	11820	9028	6909	6479	8879.56
2901	unknown3068	0.182589	0.274136	18	12	2008.54	0.402135	0.828375	20	12	16770	0.265174	0.434762	19	12.0333	13770	3154.47	0.229083	10532	11253	11963	11864	14347	12655	14431	11723	14634	19690	19177	13579	15601	15708	9074	8126	13397.3
2902	unknown3069	0.0787266	0.137955	24	12	651.952	0.47914	0.922227	20	12	6435.5	0.161353	0.290745	22	12.1	5164.32	1360.44	0.263431	3971	4529	4622	4625	5077	4663	5244	4628	5625	7552	7430	5135	6059	6062	3074	3049	5084.06
2906	unknown3072	0.719948	0.857599	24	15	825.194	0.639007	1	20	12	8681.5	0.817244	1	22	13.475	6601.33	2682.41	0.406343	6301	5355	5917	4732	6572	6113	5426	5187	6495	10985	11226	6020	9091	7307	3831	3909	6529.19
2918	unknown3083	0.475047	0.600921	24	12	1968.59	0.87266	1	21.6708	12	16938	0.779591	1	22.8354	12.0313	13473.9	3471.17	0.257622	11845	9501	12736	8392	14638	16885	10179	10306	13567	19929	23130	11126	20863	14275	8507	7678	13347.3
2920	unknown3085	0.182589	0.274136	24	15	4132.86	0.316707	0.71075	20	12	31144.2	0.222652	0.376659	22	13.475	23540.3	9566.66	0.406395	18954	20180	19476	18114	20309	22223	18778	22964	36944	31832	34763	21038	31961	25479	15363	14150	23283
2926	unknown3090	0.235786	0.334301	24	15	3827.57	0.643291	1	20.9501	12	27984	0.437744	0.651351	22.4751	13.4602	22632.1	6496.79	0.287061	19839	17553	19450	18165	22166	19073	21974	20355	25683	34735	30355	21163	30153	30373	15444	13280	22485.1
2927	unknown3091	0.182589	0.274136	24	15	2693.02	0.59506	1	20.8511	12	21248.2	0.349815	0.541893	22.4255	13.461	17009	5104.41	0.3001	14486	12874	14061	14557	16097	13988	15690	15700	19059	25685	23883	16366	22445	23911	11631	9820	16890.8
2946	unknown3108	0.105571	0.17348	18	9	3116.57	0.382382	0.802575	23.9024	6	13632.2	0.169939	0.303312	20.9512	7.8674	11615.3	2475.11	0.213091	8995	8602	10180	8253	13694	13102	13785	13948	15023	14356	11365	8994	12763	13021	8130	6372	11286.4
2956	unknown3117	0.873774	1	24	15	839.689	0.707167	1	20.0911	12	6012	0.915377	1	22.0456	13.4729	4908.6	1347.12	0.27444	4850	4428	3999	3856	4337	4239	3416	4970	5639	6691	7207	4511	7343	5838	3548	3093	4872.81
2975	unknown3134	0.235786	0.334301	18	15	1260.95	0.330303	0.729701	20	12	8710.25	0.276678	0.448192	19	13.6167	6455.06	2181.27	0.337916	6472	5796	4819	5055	5387	5032	4096	5831	7946	9780	10128	6987	9355	8493	4113	3653	6433.94
2985	unknown3143	0.719948	0.857599	18	15	824.31	0.796341	1	20	12	5870.25	0.892266	1	19	13.6167	5239.57	878.065	0.167583	6096	4741	5414	4112	4941	4863	3268	3940	5636	6624	6677	4544	8189	5816	4555	4281	5231.06
2991	unknown3149	1	1	24	18	217.082	0.999783	1	22.5575	17.9999	4808.75	1	1	23.2788	18.0173	4480.86	280.063	0.0625021	5782	3119	4196	4606	4882	3537	3450	4576	4470	4316	5222	4417	4812	3301	4748	6374	4488
2994	unknown3151	1	1	24	18	610.94	0.999797	1	20	12	10290.8	1	1	22	14.85	9299.91	1367.5	0.147044	9326	9579	9298	8415	9251	8078	8138	8814	9414	12609	11831	7309	12771	11669	6150	6350	9312.62
2999	unknown3156	0.587657	0.717585	18	15	1251.58	0.737182	1	20	12	7956	0.795605	1	19	13.6167	7249.27	1254.4	0.173038	6445	8329	8998	6613	5376	6105	5768	6779	8462	8153	8153	7056	8471	8802	7047	5237	7237.12
3042	unknown3195	0.0787266	0.137955	24	12	1172.56	0.442927	0.878549	21.4599	12	8030.75	0.151899	0.277989	22.7299	12.0376	6444.23	1599.52	0.24821	5850	5231	4423	5158	6174	5982	5486	7232	8013	8341	9090	6679	9210	7011	4539	3677	6381
3090	unknown3238	0.182589	0.274136	24	15	2076.42	0.729721	1	25.5652	12	13127.2	0.401797	0.608953	24.7826	13.5609	10595.7	2880.34	0.27184	8905	8184	6993	6539	11412	9839	10798	8651	11037	15732	15822	9918	19716	12787	7609	6256	10637.4
3099	unknown3246	0.475047	0.600921	18	6	464.746	0.826178	1	20	6	4304	0.759549	0.979115	19	6.01667	3717.74	627.589	0.168809	3585	3065	3709	2919	5285	3653	4715	3563	3525	3552	3619	2869	4018	2574	4112	3504	3641.69
3116	unknown3261	0.105571	0.17348	18	15	1035.91	0.681673	1	20.3695	12	8830.5	0.261346	0.429623	19.1848	13.6447	7384.47	1657.74	0.22449	6545	7105	6684	6649	6472	5641	6035	5157	7572	9896	10922	6932	11378	10453	5969	4461	7366.94
3119	unknown3264	0.873774	1	18	15	547.301	0.815905	1	20.6557	12	10271.2	0.954161	1	19.3279	13.6676	8627.1	1635.28	0.189551	7469	7843	7909	7524	7854	7068	7858	6639	8523	12541	12346	7675	12889	11402	6648	5555	8608.94
3120	unknown3265	0.105571	0.17348	18	6	2055.21	0.398079	0.823546	20	6.00001	7736.75	0.175224	0.311079	19	6.01667	5831.99	1955.18	0.33525	4493	4168	5726	4629	8579	7165	7950	7253	3480	4931	4469	4258	3860	3981	8550	6029	5595.06
3138	unknown3281	0.235786	0.334301	18	15	627.557	0.829372	1	20	12	4624.75	0.514683	0.735019	19	13.6167	4206.8	721.444	0.171495	4740	4360	4194	4052	3317	3485	3155	3801	4403	5385	4575	4136	6241	4850	3684	2819	4199.81
3150	unknown3292	0.531352	0.671165	24	6	248.902	0.811234	1	20	6	4137.75	0.793793	1	22	6.05	3846.97	188.872	0.0490963	3649	3850	4694	3386	4135	3963	4372	4081	4017	3785	3502	3089	3727	3386	4084	3644	3835.25
3157	unknown3299	0.235786	0.334301	18	12	1457.7	0.213297	0.554445	20	12	7475.75	0.200662	0.347965	19	12.0333	5972.4	1458.81	0.244259	4613	5265	5736	4502	4748	4763	6345	4837	7398	8661	7589	6255	7168	6565	4281	4075	5800.06
3167	unknown3307	0.235786	0.334301	18	15	890.601	0.656753	1	20	12	4932.75	0.443698	0.65824	19	13.6167	4335.75	1020.03	0.23526	4721	4896	4863	3764	3308	3290	2702	3960	4385	5215	6105	4026	5725	5536	3532	3186	4325.88
3196	unknown3333	0.873774	1	24	12	3898.99	0.962679	1	24.2975	12	31694.2	0.986659	1	24.1488	12.0005	28664.6	4159.99	0.145127	21431	28565	28353	22845	29067	27624	36415	28769	30442	37358	33540	25437	38083	32349	19418	19262	28684.9
3204	unknown3340	0.301037	0.410161	24	12	2159.5	0.416825	0.846553	24.0327	12	11728	0.385927	0.590691	24.0163	12	9151.7	2660.32	0.290691	6279	7103	6793	6170	8757	8539	9022	10793	10862	13841	13681	8528	13874	11031	5721	5456	9153.12
3209	unknown3345	0.235786	0.334301	24	15	1269.61	0.407149	0.833943	20.0911	12	7117.25	0.320968	0.507223	22.0456	13.4729	5527.4	1941.81	0.351306	4908	4869	4478	4116	4931	4667	3801	5293	7020	7643	8344	5462	7994	6988	3823	3276	5475.81
3210	unknown3346	0.475047	0.600921	18	15	658.316	0.880308	1	20	12	5537.75	0.782774	1	19	13.6167	4486.63	1103.75	0.246009	4634	4717	3872	3753	4027	3757	3621	3910	5148	6104	6822	4077	6416	5637	2881	2239	4475.94
3231	unknown3365	0.0579045	0.108728	18	6	426.209	0.972882	1	20	6	3500.75	0.218377	0.371687	19	6.01667	3427.79	79.2722	0.0231263	3211	2810	4162	2755	4093	3036	3489	3385	3035	2401	1923	2699	2904	3321	5824	5643	3418.19
3232	unknown3366	0.0787266	0.137955	18	3	78.1353	0.668755	1	25.5652	17.9999	1888.25	0.207653	0.3568	21.7826	20.3749	1559.77	229.08	0.146868	1526	1563	1788	1590	1334	1470	1353	1489	1722	1258	1374	1311	1819	1168	2427	2139	1583.19
3243	unknown3376	0.105571	0.17348	24	12	1057.83	0.342873	0.747554	23.1496	12	6319	0.156328	0.284292	23.5748	12.0039	5061.97	1380.22	0.272664	4079	4278	3535	3797	4855	5227	4209	6429	6473	6340	7438	5025	6848	5390	3590	3175	5043
3250	unknown3382	0.0579045	0.108728	18	0	1473.08	0.620307	1	20	17.9999	4915.25	0.155402	0.283084	19	18.05	4258	863.823	0.202871	5485	5252	5767	4111	3159	3089	2612	2484	3408	6065	6924	3114	7177	5060	3894	3530	4445.69
3288	unknown3416	0.235786	0.334301	18	9	652.306	0.669573	1	24.8451	12	4361.75	0.449307	0.66354	21.4225	10.5291	4004.36	516.683	0.12903	3490	3903	3039	2955	4302	4244	4253	4414	4970	4009	4905	3563	5079	4149	3181	2722	3948.62
3323	unknown3448	0.719948	0.857599	18	15	443.356	0.947725	1	20	12	4838.5	0.943138	1	19	13.6167	4295.78	590.082	0.137363	4680	4443	3788	3561	4345	3536	3512	3966	4975	5104	5643	3632	5835	4909	3737	2975	4290.06
3335	unknown3459	0.105571	0.17348	24	12	3134.6	0.306649	0.697004	24.4321	12	14257.5	0.143427	0.265288	24.2161	12.001	11884.8	3307.1	0.278262	9646	9341	8867	8771	13280	13320	12134	14876	15371	14694	16225	10740	16035	12255	8045	6933	11908.3
3344	unknown3467	0.0579045	0.108728	24	15	1402.19	0.311884	0.704845	20.464	12	9777	0.0905518	0.182367	22.232	13.4659	7590.91	2702.18	0.355975	6524	6274	6053	5488	6947	7542	7549	6295	8290	12015	11070	7733	9601	8900	5550	4541	7523.25
3376	unknown3496	0.380147	0.496542	18	6	1059.6	0.900676	1	20	6	6678.75	0.709365	0.936163	19	6.01667	5728.91	955.987	0.166871	5425	4446	5765	5382	7242	6945	5191	7337	6625	4232	4086	4801	5613	3705	7481	5533	5613.06
3377	unknown3497	0.873774	1	24	6	526.795	0.98931	1	20	6	8653.5	0.990365	1	22	6.05	8103.85	425.849	0.0525489	6930	7974	9057	8409	9045	8914	8598	8057	8705	7641	6883	7794	7687	6086	9652	7807	8077.44
3409	unknown3525	0.380147	0.496542	24	3	317.314	0.517079	0.964159	20	6	3487.75	0.516331	0.73713	22	4.675	3230.19	299.34	0.0926695	3183	3752	3632	3140	3515	3387	4171	2878	3432	2681	2446	2306	3423	2759	3655	3176	3221
3420	unknown3535	0.139706	0.220455	18	12	1106.62	0.166896	0.477318	20	12	7340.5	0.110953	0.215632	19	12.0333	5926.79	1405.01	0.237061	4888	5148	5501	4849	5247	5036	5506	5066	6800	8314	7768	6480	7111	6170	4423	3866	5760.81
3435	unknown3549	0.380147	0.496542	18	3	619.072	0.385086	0.804352	20	6	2733.5	0.427674	0.639003	19	4.43333	2449.18	628.485	0.25661	2242	2642	3014	2868	2631	2788	2341	3174	2635	1264	1407	1385	2519	1711	3212	3220	2440.81
3437	unknown3550	0.0579045	0.108728	24	6	1380.98	0.0631671	0.295116	20.3695	6	5935.75	0.0241805	0.0623225	22.1848	6.04044	4665.19	599.599	0.128526	4012	5941	5920	5191	5578	6151	6492	5522	4498	2866	3116	2497	4137	2860	4739	4580	4631.25
3448	unknown3560	0.380147	0.496542	18	0	754.836	0.453921	0.892588	28	12	4453.75	0.475744	0.693993	23	4.92857	4650.97	738.261	0.158733	5454	5657	6222	5140	4627	4034	3779	4875	5181	4377	4759	3498	4297	3780	4556	4423	4666.19
3478	unknown3588	0.235786	0.334301	18	12	904.39	0.533143	0.984019	22.2166	12	4923.25	0.3864	0.591206	20.1083	12.1334	4093.09	806.608	0.197066	3318	3377	3111	3294	3935	3612	3109	4807	5511	4823	5641	3718	5569	4622	3108	2659	4013.38
3495	unknown3602	0.0579045	0.108728	24	0	572.226	0.233667	0.589726	24.5682	6.63e-05	1733.5	0.0717491	0.150886	24.2841	3.28e-05	1165.16	648.324	0.556427	1658	1394	1715	2167	873	837	755	1222	1168	444	535	541	823	523	1979	1915	1159.31
3499	unknown3606	0.873774	1	24	3	878.403	0.559822	1	20	5.99999	6551.75	0.83894	1	22	4.67499	5772.94	904.267	0.156639	5746	6341	6601	5847	6598	6465	5689	7455	6692	3648	4796	3667	5224	3999	7072	6083	5745.19
3517	unknown3622	1	1	18	0	1188.65	0.99057	1	23.9024	17.9999	6381.99	0.999955	1	20.9512	18.3644	5761.88	829.351	0.143938	5883	5911	6973	7478	4307	4753	4617	6886	8656	3835	4304	4826	5599	3999	7654	8276	5872.31
3529	unknown3633	1	1	18	3	645.942	0.986069	1	20	6.63e-05	4114	0.999903	1	19	1.58336	3713.94	687.672	0.18516	4196	3413	4007	4840	4192	3620	2731	5783	4765	2019	2233	2764	3460	2251	5171	5844	3830.56
3540	unknown3643	0.0787266	0.137955	24	0	1706.96	0.273307	0.64703	24.1644	6.63e-05	3587.24	0.104117	0.203994	24.0822	3.3e-05	2184	1873.65	0.857899	3826	2524	3991	4008	1552	1175	1486	1412	1422	507	561	813	971	622	4278	5716	2179
3544	unknown3647	0.719948	0.857599	24	0	554.725	0.951672	1	24.0327	17.9999	2081.5	0.944219	1	24.0163	21.002	1725.32	507.534	0.294168	2443	1980	1870	2050	1191	1200	794	2276	2240	788	700	1741	819	1091	3347	3069	1724.94
3551	unknown3653	0.0787266	0.137955	24	12	497.803	0.841637	1	20	12	6068.25	0.246099	0.409534	22	12.1	5364.94	937.708	0.174784	4353	4656	6252	4642	4971	4887	7329	4883	4823	6973	5463	7014	4908	4720	4395	4685	5309.62
3582	unknown3681	0.475047	0.600921	24	3	455.907	0.589436	1	20.8511	6.63e-05	2155	0.636443	0.8647	22.4255	1.40163	1741.19	578.508	0.332248	1582	2344	2374	2320	1647	1883	2605	1698	1979	898	861	964	1178	953	2543	2390	1763.69
3633	unknown396	0.235786	0.334301	18	15	2077.66	0.779581	1	20	12	9723	0.495165	0.713259	19	13.6167	7266.07	3007.87	0.413961	7295	8023	9591	4278	4728	6240	3938	6137	6194	10368	14729	7601	8488	7903	4617	5661	7236.94
3635	unknown398	0.301037	0.410161	18	6	6385.88	0.593349	1	20	6	50387.2	0.486292	0.704937	19	6.01667	19145.2	32031.8	1.6731	4766	5127	2106	949	36598	24623	135563	4765	9980	3603	1930	607	2841	3930	5916	913	15263.6
3642	unknown403	0.122638	0.20107	24	6	4458.49	0.706853	1	20	6	134105	0.298677	0.478103	22	6.05	43764.9	85242.4	1.94774	7283	12756	6987	1316	67714	65412	394498	8795	15782	7032	3852	1293	5060	6417	10146	1293	38477.2
3649	unknown41	0.0579045	0.108728	18	9	1693.52	0.108423	0.375278	20	5.99999	8368	0.0381129	0.0901305	19	7.59999	5754.32	1981.78	0.344398	4304	4689	3073	3484	8114	8936	7505	8917	4190	4191	5909	3415	6154	5907	3726	3322	5364.75
3660	unknown42	0.0579045	0.108728	18	9	2198.39	0.106437	0.371371	20	5.99999	11115.8	0.0375286	0.0889917	19	7.59999	7613.02	2656.79	0.34898	5717	6245	3949	4611	10826	11980	10161	11496	5621	5495	7741	4499	8308	7721	4918	4164	7090.75
3680	unknown438	0.139706	0.220455	24	0	4135.51	0.429765	0.862085	24.1644	6.63e-05	9931.47	0.22892	0.384775	24.0822	3.3e-05	6007.25	4620.08	0.769084	15384	13513	8645	2184	4072	3457	10036	1449	3881	2753	1513	709	9400	8702	8203	2018	5994.94
3684	unknown441	0.182589	0.274136	18	9	3946.01	0.414762	0.845273	20	6	41758	0.27116	0.441897	19	7.6	16790.8	18432.7	1.09778	3371	5688	3151	1616	33190	26215	100814	6813	7601	5111	2995	1229	3298	3309	4638	1639	13167.4
3685	unknown442	0.105571	0.17348	18	9	415.602	0.271414	0.643606	20	6	3759.5	0.130444	0.245896	19	7.6	1559.96	1617.78	1.03707	354	679	321	183	3405	2909	8017	707	762	489	388	133	417	395	531	181	1241.94
3706	unknown461	0.873774	1	18	6	951.766	0.995029	1	20	5.99998	6133.5	0.991079	1	19	6.01666	5485.63	449.285	0.0819022	8618	7273	4515	1953	6188	4994	10779	2573	5336	4147	2353	876	9583	9753	6083	1875	5431.19
3707	unknown462	0.0787266	0.137955	24	3	1527.17	0.247508	0.610392	20.9501	6.63e-05	8073.74	0.0962209	0.191205	22.4751	1.40473	6393.99	2487.15	0.388982	9798	5382	10016	7099	7662	7510	7983	4034	4757	4481	4155	3356	6531	8232	5347	7446	6486.81
3711	unknown466	0.719948	0.857599	18	12	4829.89	0.427567	0.860033	20.3695	12	16612	0.670513	0.89443	19.1848	12.0459	11791.5	4195.11	0.355775	8361	7794	11709	5566	9971	9599	7643	6068	11937	17909	19963	16639	20822	16788	5065	5070	11306.5
3713	unknown468	0.0579045	0.108728	18	6	5730.04	0.32365	0.71867	20	6	16578.2	0.0932741	0.186376	19	6.01667	8833.09	7856.33	0.88942	9114	6204	3078	1221	19353	14620	26331	6009	6376	4203	1959	769	10952	7317	6791	1800	7881.06
3714	unknown469	0.0579045	0.108728	18	6	2770.27	0.416227	0.846187	20	6	8732.75	0.113891	0.220057	19	6.01667	6751.98	1470.25	0.217752	11262	4456	8871	4858	11627	11218	7655	4431	3584	3692	4200	3061	6368	6782	4998	8118	6573.81
3718	unknown472	0.380147	0.496542	24	0	1849.44	0.610389	1	24.2975	6.63e-05	6110.23	0.571011	0.796954	24.1488	3.3e-05	4410.65	2197.42	0.498207	8235	8456	5520	2230	3209	2533	4957	2063	4350	3746	2690	1165	6024	8094	4887	2243	4400.12
3749	unknown50	0.0579045	0.108728	18	9	1356.58	0.015808	0.240485	20	6	13406.8	0.00731936	0.0230661	19	7.6	6070.7	5405.67	0.890452	2433	2656	1671	1601	12965	14071	13196	13395	2969	2622	2585	1222	2799	2819	1795	1330	5008.06
3754	unknown504	0.380147	0.496542	24	21	56985.7	0.868577	1	26.4865	17.9999	212637	0.696066	0.921984	25.2432	19.6214	141267	50899.7	0.360309	178897	28156	34057	270664	153193	81289	23574	107336	152080	47571	261338	30980	187460	205899	181716	275474	138730
3757	unknown507	0.182589	0.274136	24	0	8720.04	0.477945	0.921828	24.2975	6.63e-05	24130.9	0.300093	0.480016	24.1488	3.3e-05	15648	10692.2	0.683294	39165	31264	19714	6381	10611	9111	14303	6066	14506	10430	6707	2426	28123	27082	17434	6225	15596.8
3767	unknown516	0.0579045	0.108728	18	15	3155.29	0.991595	1	20	12	16522.8	0.221484	0.375557	19	13.6167	14216.4	4517.46	0.317763	14962	18642	18020	16039	10453	6579	17228	9093	13926	17473	18279	16413	14291	14847	10524	9994	14172.7
3770	unknown519	0.105571	0.17348	18	0	14246.6	0.764376	1	20	17.9999	48567.2	0.283812	0.457013	19	18.05	45245.5	11407.7	0.252129	41731	69159	74854	66469	35088	18948	53308	22864	32453	45604	56658	52181	40993	46958	43103	63215	47724.1
3773	unknown521	0.182589	0.274136	18	0	5454.09	0.695842	1	26.0177	17.9999	16077	0.389182	0.593749	22.0088	18.6177	15783.6	4621.2	0.292784	14079	24241	28315	21611	12639	7259	16640	8242	11154	16240	17726	16414	14623	15996	14547	19142	16179.2
3775	unknown523	0.105571	0.17348	18	12	1787.92	0.410038	0.838274	20.5594	12	9346.5	0.179207	0.31698	19.2797	12.0531	7576.15	1916.03	0.252902	5312	6190	6355	6301	7686	6320	8896	7072	7486	10548	10475	8877	8431	9337	4084	4348	7357.38
3777	unknown525	0.139706	0.220455	18	15	1230.19	0.556958	1	20	12	3682.5	0.276498	0.448169	19	13.6167	3345.63	1213.99	0.362859	2898	4701	5143	4551	1996	1257	3214	1628	3062	3748	3953	3967	2890	3428	3072	3834	3333.88
3784	unknown531	0.105571	0.17348	18	15	545.533	0.93921	1	20	12	4838.5	0.328305	0.517119	19	13.6167	4573.44	620.132	0.135594	4816	5895	4506	4628	3842	3793	3992	4376	4939	4300	5521	4594	4597	5040	3989	4251	4567.44
3792	unknown539	0.0579045	0.108728	18	15	5814.01	0.764096	1	20	12	24241.2	0.1822	0.321224	19	13.6167	20788	5993.28	0.288304	26530	24700	22025	18826	16447	17623	13511	15282	18008	26253	28045	24659	23989	24761	16415	14606	20730
3835	unknown578	0.182589	0.274136	18	6	2022.68	0.479217	0.922227	20	6	7566	0.300659	0.480567	19	6.01667	5394.95	1791.82	0.33213	5864	7607	6020	2638	7324	7212	12541	3187	3814	3122	2278	1214	5729	5504	6214	2577	5177.81
3842	unknown584	0.235786	0.334301	24	12	1669.83	0.333215	0.733141	23.3952	12	7472.25	0.278427	0.450215	23.6976	12.0019	5707.91	2206.4	0.386552	4093	5206	3764	3552	6004	6828	6141	6157	5846	7894	9509	6640	7306	7015	2467	2558	5686.25
3844	unknown586	0.0787266	0.137955	18	6	2365.63	0.233831	0.589726	20	6	8825	0.0919501	0.184582	19	6.01667	4376.21	4572.91	1.04495	1920	2398	2549	1352	6923	6398	17135	4844	2156	2330	2381	1645	2443	3360	1863	1456	3822.06
3867	unknown606	0.719948	0.857599	18	15	717.006	0.999851	1	28	12	7028.5	0.95647	1	23	14.5119	6588.83	1307.76	0.198482	6475	7797	8020	7127	6355	6022	6285	6049	6801	7257	8271	5785	5635	4409	5835	7235	6584.88
3924	unknown658	0.105571	0.17348	18	3	345.952	0.974089	1	20	6	1287.5	0.336747	0.526757	19	4.43333	799.407	631.534	0.790003	884	890	953	474	679	650	3623	198	351	290	332	181	1002	1059	697	393	791
3970	unknown7	0.0787266	0.137955	18	9	735.745	0.751682	1	20	6	6554	0.226485	0.381142	19	7.6	5897.1	608.092	0.103117	4867	5207	5612	4953	7060	6799	5649	6708	6409	6024	4758	5586	6805	5561	5281	5162	5777.56
4011	unknown736	0.139706	0.220455	24	12	5549.73	0.554431	1	23.6461	12	39928.8	0.275596	0.448115	23.8231	12.0007	34278.4	8041.14	0.234584	28291	35732	29942	27126	35699	34998	42798	36034	37686	42257	43557	36215	38431	40657	18988	19301	34232
4039	unknown761	1	1	18	12	610.587	0.998782	1	20	12	11404	0.999999	1	19	12.0333	10620.2	984.388	0.0926904	9765	11615	10634	9898	10793	10661	11134	9387	11459	11368	11211	11578	11642	12269	7152	7496	10503.9
4054	unknown775	0.0787266	0.137955	24	3	770.216	0.11206	0.379919	28	6.63e-05	5478.24	0.0505552	0.113422	26	1.62503	3736.94	105.506	0.0282332	5188	6342	5743	4640	3532	2883	2946	3628	3953	2745	3515	2490	2543	2959	3465	3187	3734.94
4060	unknown780	1	1	24	12	663.973	0.941019	1	20	12	8134.5	0.998225	1	22	12.1	6843.98	1518.94	0.221938	6777	7246	6284	5339	7260	6959	6064	6451	6346	9075	10800	6317	7811	7539	3670	4132	6754.38
4121	unknown835	1	1	18	6	252.26	0.999996	1	20	6.00001	4537.25	1	1	19	6.01667	4131.73	396.978	0.0960803	3392	4400	3887	4264	2398	3737	5134	6880	2539	3439	4731	4900	3190	4267	3476	4704	4083.62
4163	unknown873	0.475047	0.600921	24	12	3631.88	0.719551	1	26.4865	12	15190.2	0.708754	0.935642	25.2432	12.0292	12206.5	3279.54	0.268672	8832	8644	7579	7053	13477	14437	11994	12553	12473	17505	16374	14409	17563	22662	5730	6188	12342.1
4172	unknown881	0.235786	0.334301	18	6	961.842	0.967154	1	20	6.00001	5402.75	0.565139	0.79167	19	6.01667	4538.72	905.965	0.199608	3711	4503	4759	2860	6595	5019	5529	4468	3074	3297	4754	3605	3346	3377	6404	5562	4428.94
4173	unknown882	0.719948	0.857599	18	9	1168.49	0.993533	1	20	6.00001	17054.8	0.954961	1	19	7.60001	15705.1	1095.92	0.0697813	14158	16832	14541	12794	19867	17955	17334	13063	11359	15275	18196	15608	15162	16136	15299	14256	15489.7
4179	unknown888	0.235786	0.334301	24	9	1610.08	0.512421	0.959266	24.0327	5.99999	10458.2	0.376171	0.578417	24.0163	7.50102	8685.19	1962.31	0.225937	6138	8310	9057	8127	9592	7176	14979	10086	11274	8040	7902	10732	5565	8184	6599	7224	8686.56
4181	unknown89	0.0579045	0.108728	18	0	40537	0.556619	1	20	12	139739	0.142938	0.264809	19	15.2	117486	61366.1	0.522328	101103	158801	212923	188377	75876	39336	100090	49646	98267	156909	141739	162040	107501	126406	113066	147214	123706
4183	unknown891	0.182589	0.274136	18	0	2496.62	0.906214	1	20	17.9999	20891	0.463135	0.679327	19	18.05	20452.7	2181.69	0.10667	28166	26823	19502	21634	20432	15991	18372	16902	18479	22237	22252	20473	24739	22005	19721	17099	20926.7
4189	unknown897	0.380147	0.496542	18	12	901.915	0.943939	1	24.8451	12	10951.8	0.726603	0.954721	21.4225	12.3143	9866.2	1774.18	0.179824	8061	9574	9982	9343	8962	7387	16938	9323	12831	12214	8334	10428	8429	7717	7914	8507	9746.5
4191	unknown899	1	1	18	12	654.074	0.998896	1	23.1496	12	9134	0.999999	1	20.5748	12.1909	8558.94	608.003	0.0710372	8883	8071	7309	7493	10047	8273	8694	7102	8371	9621	9000	9544	11114	9559	6262	6740	8505.19
4194	unknown900	0.235786	0.334301	18	12	2429.97	0.953111	1	24.8451	12	30364.8	0.560221	0.786329	21.4225	12.3143	27278.7	4887.16	0.179156	23618	26907	27680	24821	24373	19986	45607	26353	35974	33482	23304	28699	23345	21252	22412	23371	26949
4195	unknown901	0.182589	0.274136	24	12	2129.45	0.405999	0.832643	24.7059	12	9755.25	0.267014	0.436785	24.3529	12.0025	8040.06	2251.73	0.280064	6052	7008	5745	5211	9355	8707	9658	8107	10198	10000	8740	10083	11235	10072	4469	4420	8066.25
4197	unknown903	1	1	18	9	4671.15	0.996315	1	23.3952	12	46315	0.999993	1	20.6976	10.4826	42547	3473.08	0.0816293	39245	41758	35708	36001	45611	41668	46646	35922	46198	46638	42320	50104	56106	54185	28402	26631	42071.4
4207	unknown912	1	1	18	12	544.826	0.999616	1	20	12	9993.75	1	1	19	12.0333	9366.44	563.477	0.0601591	8417	9259	9728	8615	9432	9802	9485	6799	10163	10047	9020	10745	11512	11404	7660	6710	9299.88
4208	unknown913	0.873774	1	18	15	895.374	0.951859	1	20	12	6666.5	0.98497	1	19	13.6167	5779.5	1206.48	0.208752	6558	5538	6228	4752	5517	5437	4583	3270	5260	7738	8346	5322	8257	7528	3958	3993	5767.81
4210	unknown915	0.587657	0.717585	18	12	490.732	0.969357	1	20	12	5374.25	0.890211	1	19	12.0333	4958.26	475.145	0.0958291	4212	4711	5521	4701	4900	3982	6207	4314	5647	5419	5400	5031	4611	5029	4305	4444	4902.12
4216	unknown920	0.587657	0.717585	24	21	276.479	0.918525	1	22.4427	17.9999	3207.25	0.872603	1	23.2214	19.4716	2912.83	300.089	0.103023	2871	3143	3743	2392	3188	2768	2084	2236	2605	3027	3345	2540	2623	2925	3849	3432	2923.19
4221	unknown925	0.873774	1	18	9	1560.05	0.957153	1	23.7736	5.99999	12108.5	0.98581	1	20.8868	7.85741	10826.8	1649.54	0.152357	9381	10429	9644	7696	13585	16765	10068	8016	9994	11624	15075	9181	11355	12429	7743	6672	10603.6
4230	unknown933	1	1	18	6	1301.96	0.999984	1	25.4179	6	5565.75	1	1	21.7089	6.1804	4712.55	1270.38	0.269574	1564	1994	4051	5947	3711	4561	5466	8525	1178	2526	4578	12053	2675	3742	3483	7862	4619.75
4232	unknown935	0.301037	0.410161	24	12	4127.74	0.415764	0.845986	25.2722	12	14353.2	0.385264	0.590092	24.6361	12.008	10667.1	4266.31	0.399952	6381	5815	6823	5439	13996	13766	11148	8590	10742	16895	17312	12464	15981	17176	5196	4386	10756.9
4234	unknown937	0.719948	0.857599	24	3	501.162	0.587874	1	28	12	5219.25	0.787147	1	26	7.19643	5173.64	147.675	0.0285438	6191	5283	6532	6040	5544	5104	4730	4676	4849	5057	6208	4763	3981	4362	4412	4853	5161.56
4238	unknown940	0.0787266	0.137955	18	0	1000.03	0.141258	0.435182	28	18	1262.5	0.0611523	0.131999	23	18.8928	1561.17	674.936	0.432328	2806	2694	3126	2438	1350	1013	602	1548	1811	874	1527	595	1001	944	1545	1560	1589.62
4262	unknown962	0.0787266	0.137955	24	6	1310.98	0.143628	0.436428	20	6	11605.2	0.0619903	0.133475	22	6.05	9052	2408.09	0.266028	8989	9032	8302	6899	12821	13560	11037	9003	7149	9183	8319	8011	10009	7587	6333	6208	8902.62
4277	unknown976	0.380147	0.496542	18	15	983.939	0.975518	1	20	12	5574.25	0.738708	0.965763	19	13.6167	4968.16	1100.98	0.221608	6222	5383	5572	4590	4401	3992	3991	3775	4788	6759	6117	4633	5943	6298	3636	3220	4957.5
4299	unknown996	0.475047	0.600921	18	12	414.718	0.975893	1	20.7529	12	5661.5	0.819981	1	19.3765	12.0609	5314.91	382.047	0.0718821	5082	4997	5211	4752	5375	4625	6509	4750	5911	5942	5501	5292	4655	6246	4551	4951	5271.88
4313	Val-Gln	0.0787266	0.137955	18	15	4427.02	0.596725	1	20	12	25410	0.190641	0.33366	19	13.6167	21906.5	5592.94	0.25531	22863	25783	23227	21648	17222	16679	14604	20155	21234	27074	29899	23433	25876	25788	17934	16218	21852.3
4322	Val-Ser	0.301037	0.410161	18	12	1431.89	0.747531	1	20.5594	12	10359	0.560674	0.786688	19.2797	12.0531	8641.42	1770.03	0.204831	7739	7977	6903	6056	9164	8378	7006	8733	9925	11643	12445	7423	11463	9809	5525	4840	8439.31
4323	Val-Thr	0.380147	0.496542	24	15	6651.58	0.717384	1	20	12	72411.2	0.627057	0.855598	22	13.475	60183.2	15650.3	0.260045	49016	58524	54741	53348	64942	55512	42882	59173	59068	84441	83303	62833	77387	68031	42916	40079	59762.2
4327	Vanillin	0.0579045	0.108728	18	9	10714.8	0.0642008	0.296449	20	6	42647	0.0245159	0.0630742	19	7.6	21353.1	15721.9	0.73628	12279	8925	7259	11061	40354	30821	67708	31705	11333	11280	13292	6590	11740	10560	9252	8042	18262.6

## Sheet: unique cycling in TM
ID	CycID	JTK_pvalue	JTK_BH.Q	JTK_period	JTK_adjphase	JTK_amplitude	LS_pvalue	LS_BH.Q	LS_period	LS_adjphase	LS_amplitude	meta2d_pvalue	meta2d_BH.Q	meta2d_period	meta2d_phase	meta2d_Base	meta2d_AMP	meta2d_rAMP	X0	X0.1	X0.2	X0.3	X6	X6.1	X6.2	X6.3	X12	X12.1	X12.2	X12.3	X18	X18.1	X18.2	X18.3	TM
17	2,6-Diaminopimelic acid	0.0177588	0.0456354	18	12	10.6066	0.367178	0.782729	24.0327	6.00003	69	0.0393376	0.0922708	21.0163	9.62893	59.5941	14.9849	0.251449	37	47	50	58	66	68	38	104	68	69	70	68	34	47	43	54	57.5625
23	2-Hydroxybenzaldehyde	0.0144977	0.0373217	24	9	514.597	0.181105	0.502036	24.7059	5.99999	3927.25	0.0182281	0.0493916	24.3529	7.52331	3460.57	520.326	0.150358	3554	3251	3365	3162	3520	3663	4171	4355	4258	3419	3073	4027	3434	2558	2761	2924	3468.44
25	2'-O-Methyladenosine	0.00421867	0.0142044	24	21	357.796	0.134692	0.419883	24.1644	17.9999	619.747	0.00481455	0.0163634	24.0822	19.5053	380.557	444.809	1.16884	363	353	785	1404	62	37	36	115	28	65	78	259	598	492	427	962	379
32	3-Amino-1-propanol	0.0144977	0.0373217	18	12	3284.51	0.744685	1	26.3284	12	68803	0.0596876	0.129483	22.1642	12.4391	62952.8	8649.84	0.137402	58496	66327	68188	58669	58590	59448	71758	64665	61808	68065	78090	67249	57975	58559	52178	50533	62537.4
35	3-Hydroxybutyric acid	0.000987235	0.00453311	24	9	1158.95	0.0787765	0.319548	24.4321	6.00002	6514.25	0.00081362	0.00389279	24.2161	7.51399	5503.82	1094	0.198771	4613	5233	6379	4590	6688	6657	7096	5616	4972	6147	6632	6037	4765	4494	4066	4238	5513.94
36	3-Hydroxybutyrylcarnitine	0.000171384	0.00117234	24	0	2521.37	0.0218828	0.240485	24.7059	6.63e-05	11154.7	5.06e-05	0.000427977	24.3529	3.27e-05	7810.21	3466.8	0.443881	12198	11872	11312	9237	6088	7738	8066	6943	4430	4176	4662	5709	10064	7401	7861	6590	7771.69
54	4-Hydroxy-3-methoxymandelic acid	0.000987235	0.00453311	18	15	1376.03	0.0759675	0.314446	20	12	4315.75	0.000787331	0.00380209	19	13.6167	2602.13	1885.26	0.724505	2322	3364	2136	1833	1394	1442	1680	1635	4501	4309	4771	3682	2524	2723	1681	1345	2583.88
57	4-Methyl-2-oxovaleric Acid	0.0299489	0.0655606	18	12	584.777	0.186647	0.511183	24.2975	12	5457.25	0.0345834	0.0832848	21.1488	12.272	4752.67	1098	0.231028	4167	4342	4613	3618	6510	5383	5171	4007	5174	5488	5999	5168	4497	4393	2802	3403	4670.94
63	5-Methyl-2-thiouridine	0.0210199	0.0497627	18	15	1538.66	0.220794	0.567381	20	12	4121.25	0.0295766	0.0730557	19	13.6167	3244.1	1662.75	0.512545	3878	4160	4089	3236	1380	1470	1906	1675	3844	4918	4453	3270	4781	3961	2315	2312	3228
64	5'-Methylthioadenosine	0.00164724	0.00683195	24	12	88.0348	0.0741314	0.312463	22.7907	12	518	0.00122241	0.00537912	23.3953	12.008	372.51	148.526	0.398717	239	95	289	343	329	347	419	373	476	418	633	545	412	352	276	368	369.625
72	Acetyl-.beta.-alanine	7.77e-06	0.000118884	18	0	2256.91	0.0739416	0.312054	24.5682	18	6015.99	8.83e-06	0.000115166	21.2841	18.439	5096.41	2171.62	0.426108	8393	7156	8778	6319	2664	2969	3976	3348	3917	4045	4438	5580	7069	6219	5807	4969	5352.94
73	Acetylcarnitine	0.000171384	0.00117234	18	9	161837	0.0816607	0.325981	20	6	613760	0.000170418	0.00111805	19	7.6	437781	174793	0.39927	264060	280522	269361	234221	507989	607947	789052	550050	355307	395309	429643	454802	337385	432315	313487	233285	403421
78	Adenine	8.77e-05	0.000728787	18	15	182265	0.0703414	0.306427	20	12	431118	8.02e-05	0.000624292	19	13.6167	256140	219883	0.858447	233681	359225	243386	202778	89728	102644	100283	105599	376236	433237	500887	414111	253998	315191	181967	151219	254011
79	Adenosine	0.0419656	0.0850707	24	6	6859.64	0.574794	1	28	6.63e-05	60964.7	0.113966	0.220104	26	3.25003	51285	2842.87	0.0554327	53509	87026	48893	54431	46412	49666	61314	57385	49764	53992	53168	44836	43609	43538	35238	37039	51238.8
81	Ala-Ala	0.0419656	0.0850707	24	12	9602.33	0.18869	0.514826	24.1644	12	39939.8	0.0462326	0.104975	24.0822	12.0001	33372.9	9966.75	0.298648	25051	28216	26076	25088	40219	39695	34786	40003	44655	40840	44268	29996	41886	32337	21243	20037	33399.8
88	Ala-Glu	0.0144977	0.0373217	24	12	2355.9	0.356757	0.766628	22.9091	12	13572	0.0324008	0.0791289	23.4545	12.0065	10069	3449.02	0.342538	6559	6768	6648	7571	8976	9276	6853	13966	19415	11362	13657	9854	14627	9077	7980	7546	10008.4
91	Ala-Ile-Arg	0.00980952	0.0273153	24	3	1591.34	0.14161	0.435182	21.995	6.63e-05	8837.99	0.0105283	0.0310754	22.9975	1.43738	7191.04	2115.52	0.294188	7161	10145	9763	8283	7251	7637	10728	6044	4717	5135	5466	5464	6216	6304	8146	7348	7238
98	Ala-Pro	0.000320124	0.00187824	18	9	3053.11	0.0425535	0.256983	20	6.00001	14782.2	0.000166245	0.00109732	19	7.6	12320.3	2773.95	0.225153	9381	9388	9880	10017	14552	14348	15493	14736	13977	11874	12156	11748	12384	10341	9942	8183	11775
100	Ala-Pro-Lys	0.0299489	0.0655606	24	12	1743.37	0.441601	0.877472	24.4321	12	8345.75	0.0704337	0.148842	24.2161	12.001	7026.82	1978.89	0.28162	5424	5194	5842	5321	7140	8246	5910	11090	10558	7365	9293	6167	8602	5916	5141	5445	7040.88
105	Ala-Val-Lys	0.0419656	0.0850707	24	6	1218.7	0.157714	0.461732	20	6	7178.5	0.0398297	0.0928217	22	6.05	5590.6	1133.07	0.202675	5107	5604	6152	5367	7297	6660	6628	8129	6352	3047	4430	3513	4929	3439	6123	5548	5520.31
112	Arg-Gln	0.0419656	0.0850707	24	12	2303.05	0.230871	0.585788	24.2975	12	13496	0.0546129	0.120835	24.1488	12.0005	10436.7	3164.44	0.303204	6002	9956	6924	6119	11297	9303	7842	14176	17460	11908	12747	11869	14204	9230	9886	8311	10452.1
113	Arginine	0.00980952	0.0273153	18	15	54026.1	0.567464	1	20	12	397312	0.0344624	0.0830858	19	13.6167	356204	65306.6	0.18334	322727	396502	369601	401771	305280	292426	224227	379848	403956	396492	403364	385435	396049	362931	324770	323770	355572
121	Asn-Arg	0.0419656	0.0850707	24	0	455.377	0.336198	0.737082	25.5652	6.63e-05	4722.49	0.0742256	0.155114	24.7826	3.21e-05	4077.04	625.643	0.153455	3778	4490	4946	5676	3850	3807	3125	4343	3543	3885	3600	3484	4422	3793	3912	4344	4062.38
133	Asparagine	0.0210199	0.0497627	18	0	9715.12	0.159206	0.463955	20	12	79728	0.022421	0.0584836	19	15.2	72150.1	17837.2	0.247224	76108	86807	90907	84488	59294	55360	59357	53319	76079	81496	83528	77809	77819	78462	69605	72892	73958.1
135	Aspartic acid	0.000572095	0.00298095	18	0	11955.8	0.107211	0.373471	20	17.9999	62315.7	0.000656232	0.0032697	19	18.05	52404.8	12205.4	0.232906	56963	71496	63423	70059	45824	40452	28791	42406	51312	52440	58512	49967	75397	67152	53341	53373	55056.8
136	Asp-Asp	0.0210199	0.0497627	24	15	397.394	0.422193	0.853851	22.7907	12	1486.25	0.0508024	0.113917	23.3953	13.4702	1104.1	409.654	0.371028	754	673	574	1069	851	832	222	1621	1763	1244	1404	1534	1939	1072	1107	940	1099.94
146	Benzyldimethyltetradecylammonium cation	0.0210199	0.0497627	24	6	2479.47	0.781096	1	24.5682	6	9862	0.0838879	0.171015	24.2841	6.00082	6155.05	2685.55	0.436316	3139	19879	3498	4929	4964	4994	12991	16499	1440	4322	3344	9864	1080	1000	3057	3883	6180.19
147	beta-Hydroxymyristic acid	0.000987235	0.00453311	24	21	588.313	0.0485618	0.27167	22.9091	17.9999	2803.25	0.000524749	0.00274326	23.4545	19.4756	2266.39	631.154	0.278484	2307	2122	3082	2873	1969	1638	1629	1273	1894	2140	2178	2186	2595	3199	2756	2663	2281.5
149	Biliverdin	0.0299489	0.0655606	24	3	488.257	0.199015	0.52932	27.6489	6.63e-05	2126.24	0.0364926	0.0870116	25.8245	1.61406	1115.88	574.376	0.514728	1420	3083	2794	1208	729	883	1371	794	384	536	528	711	224	302	1406	1311	1105.25
150	Binospirone	0.0299489	0.0655606	18	15	3446.79	0.254278	0.618979	20	12	8187.75	0.0447599	0.102006	19	13.6167	6873.81	2956.04	0.430044	6278	10550	9096	7121	3652	3793	4303	3178	4928	9056	9508	9259	7836	7492	6493	6980	6845.19
151	Biotin	0.0419656	0.0850707	18	0	476.236	0.853236	1	20	12	2972.5	0.155029	0.282523	19	15.2	2863.49	592.703	0.206986	3777	3357	3857	2840	2739	2366	2553	1965	2657	3294	3138	2801	3121	3333	2489	2490	2923.56
152	Biotin	0.00980952	0.0273153	18	15	590.434	0.645524	1	20	12	1966	0.0383869	0.09063	19	13.6167	1796.41	597.012	0.332337	2167	2670	2464	1974	1267	1031	1342	1179	1632	2075	2086	2071	1722	1971	1444	1555	1790.62
153	Bis(2-ethylhexyl) adipate	0.0299489	0.0655606	24	9	2862.01	0.435467	0.869329	20.2759	6	25438.2	0.0696379	0.147376	22.1379	7.42637	20343	4369.73	0.214803	18060	18973	20930	14241	23979	36620	22981	18173	21708	21982	18752	17479	19468	16278	13032	17358	20000.9
154	Caffeic acid	0.0210199	0.0497627	18	6	175.009	0.126436	0.405532	20	6	3192.5	0.0184185	0.0497827	19	6.01667	1238.16	2026.18	1.63645	181	113	80	249	4161	4063	293	4253	218	270	286	180	364	415	321	435	992.625
181	Disaccharide 03	4.22e-05	0.000430754	18	9	7678.47	0.129084	0.40965	20	6.00002	30296	7.14e-05	0.000569677	19	7.60001	14742.1	12806.4	0.868691	3872	4295	4815	3861	41095	19702	47243	13144	9180	14064	6625	4991	5736	6075	5649	5248	12224.7
207	Galactose	7.77e-06	0.000118884	18	9	44241.4	0.0422992	0.256983	20	5.99999	156588	5.24e-06	7.82e-05	19	7.59999	121103	43004.7	0.35511	66568	75986	84633	72552	163038	153716	173570	136026	99568	124638	145428	135513	82853	96271	101240	90780	112649
209	gamma-Glutamylleucine	0.00980952	0.0273153	18	15	5512.07	0.137211	0.425896	20	12	31851.5	0.0102437	0.0304012	19	13.6167	26705.6	6648.2	0.248944	26420	25652	24445	25058	19606	20695	16084	23408	32735	31797	35479	27395	38588	32013	23221	23664	26641.2
221	Gln-Thr	0.000987235	0.00453311	24	9	1046.69	0.0594399	0.288288	20	6.00001	4879.5	0.000630435	0.00314854	22	7.425	3810.4	1042.12	0.273494	2882	3128	3137	3235	4788	4725	4677	5328	4205	4176	4390	2820	3926	2837	2593	2720	3722.94
222	Gln-Tyr	0.0419656	0.0850707	18	0	1623.87	0.355715	0.765197	28	17.9999	7555.75	0.0776921	0.16096	23	18.8928	8073.76	1233.24	0.152746	10793	11557	9582	8957	7623	7107	6531	7532	7821	8538	8470	5278	8525	7802	7236	6660	8125.75
224	Glu-Ala	0.0299489	0.0655606	24	12	1803.12	0.157597	0.461732	21.1511	12	10190.5	0.0299994	0.0739313	22.5755	12.048	7341.97	2818.45	0.383882	5040	5006	4813	5591	6070	6913	4800	9373	13031	9005	11153	7573	9200	7498	5220	5205	7218.19
230	Glu-Gln	0.0419656	0.0850707	24	15	1037.68	0.229194	0.582888	21.0501	12	4371.25	0.0542864	0.120297	22.5251	13.4595	3220.13	1330.63	0.413222	2429	2460	2261	2583	2325	2233	1502	3830	5557	4207	4618	3103	5006	3632	2666	2640	3190.75
240	Glutamine	0.000572095	0.00298095	18	0	61117.9	0.141579	0.435182	20	17.9999	350342	0.000844072	0.0040163	19	18.05	327570	52116.4	0.1591	353370	414112	440287	396610	266603	249451	275030	270588	310901	340488	341977	361522	339127	352959	338516	370765	338894
241	Glu-Tyr	0.0144977	0.0373217	18	15	1943.13	0.190375	0.51656	20	12	12954.8	0.0190234	0.0510987	19	13.6167	10946.7	2539.95	0.232029	10246	10734	10586	10896	8991	8440	7149	10096	13786	12717	14498	10818	14159	12899	9506	9233	10922.1
242	Glu-Val-Phe	0.00164724	0.00683195	18	0	390.323	0.199557	0.53011	27.6489	17.9999	1955.5	0.00296514	0.0110396	22.8245	18.8418	2026.4	321.088	0.158452	2409	2832	2548	2311	1815	1743	1693	1802	2002	2037	1911	1753	2063	2091	1930	1738	2042.38
243	Gly-Arg	0.0419656	0.0850707	24	21	11347.3	0.526932	0.974892	23.1496	17.9999	90677.2	0.106399	0.207619	23.5748	19.4792	77623	11533.9	0.148589	69662	78327	77959	93387	65726	52361	63141	72945	107704	69874	69656	61942	112147	82982	90392	77188	77837.1
244	Glyceraldehyde	4.22e-05	0.000430754	18	9	2417.24	0.0456671	0.263432	23.52	6.00001	8569.75	2.73e-05	0.000269236	20.76	7.83797	6564.56	2352.32	0.358336	3441	4195	4854	3986	8837	8270	10308	6864	5957	7541	7407	7843	4574	5533	5381	4765	6234.75
245	Glyceric acid	0.000572095	0.00298095	18	12	355.321	0.0979507	0.357427	24.1644	12	3686	0.000604612	0.0030548	21.0822	12.2621	3041.49	940.958	0.309374	2228	2449	2944	2959	3161	3359	3011	3765	2912	3436	4054	4342	2458	2090	2162	2188	2969.88
247	Glycerophosphocholine	8.77e-05	0.000728787	18	9	8116.53	0.039321	0.251492	20	5.99998	35711.2	4.68e-05	0.000401419	19	7.59999	27753.3	9258.49	0.333599	20409	18119	21575	13799	36154	36166	39037	31488	28961	31619	28662	24704	20180	24383	22773	16904	25933.3
248	Glycine	0.0419656	0.0850707	18	15	947.17	0.177176	0.496873	20	12	5044.75	0.0438795	0.100581	19	13.6167	4727.82	936.087	0.197996	5194	5104	5937	4934	3895	3583	3621	3423	4988	5176	5341	4674	5900	4947	4433	4350	4718.75
270	Hexanoic acid, 5-(acetylamino)-4-oxo-	0.000171384	0.00117234	18	9	2557.61	0.082396	0.327746	20	6	8342	0.000171826	0.00112558	19	7.6	5335.77	2749.33	0.515265	3238	1747	2044	3333	9244	9745	8575	5804	3057	4855	4637	5403	4346	4313	2461	3923	4795.31
274	His-Gln	0.0210199	0.0497627	24	12	3028.54	0.195284	0.522932	23.1496	12	16276	0.0266634	0.0672409	23.5748	12.0039	12677.6	3860.06	0.304478	10082	9608	8565	9330	13934	12805	9901	14893	15774	19060	18620	11650	16248	12810	9849	8864	12624.6
275	His-Glu	0.0419656	0.0850707	24	18	3915.25	0.231467	0.586455	21.0501	12	19280.8	0.0547288	0.12103	22.5251	14.8673	14894	6010.13	0.403527	11810	11864	11526	14193	10416	9719	8195	15494	26690	15849	20422	14162	22918	13836	15827	15818	14921.2
282	Histamine	0.0144977	0.0373217	18	0	27922.6	0.319032	0.713656	26.1721	17.9999	91780.4	0.0294916	0.0728873	22.0861	18.6379	89902.9	19584.6	0.217842	111557	117846	128023	113872	60925	69251	79772	97990	46816	74654	83983	112385	90902	100304	80093	95823	91512.2
284	His-Thr	0.0065055	0.0199214	18	9	3028.89	0.865003	1	27.3065	6.00002	12241.2	0.0347773	0.0836122	22.6533	8.1521	9590.3	2185.18	0.227853	5493	6363	5083	7085	13141	11554	9266	15004	9403	8860	11255	8575	14944	10944	6874	7466	9456.88
287	His-Tyr	0.0144977	0.0373217	18	0	11486.9	0.514281	0.961086	20	12	46552	0.0439805	0.100653	19	15.2	43865.1	14716.4	0.335492	61231	70348	49749	45685	35844	29808	32696	28875	42949	50305	51614	41340	51835	57717	35875	39837	45356.8
292	Ile-Arg	0.00980952	0.0273153	24	3	11372.8	0.120485	0.395358	27.8233	6.63e-05	95203.9	0.00914865	0.0277019	25.9117	1.61951	76759.2	11788.4	0.153577	83108	111675	92696	93337	71525	74133	87528	70570	71493	73447	64308	52247	81592	71281	67670	58001	76538.2
296	Ile-Gly-Ile	0.0144977	0.0373217	18	0	3973.06	0.293184	0.675977	28	12	13424.5	0.0274613	0.0687747	23	4.92857	14169.5	4961.15	0.35013	20385	20556	17570	17163	14279	11551	9384	10469	12329	14408	13717	13244	13697	15244	12273	12079	14271.8
297	Ile-Gly-Leu	0.00267199	0.0100694	18	0	4553.41	0.518782	0.965332	27.1385	12	16242.2	0.0105089	0.0310393	22.5692	4.98979	16494.4	6352.76	0.385145	25122	23438	20799	18356	14553	11938	11612	12348	15330	17272	19022	13345	15672	19029	15117	13934	16680.4
298	Ile-His	0.0419656	0.0850707	18	15	7108.01	0.37478	0.792382	20	12	38220.5	0.081035	0.166373	19	13.6167	34714.5	6864.64	0.197746	37712	37382	35277	36836	27736	27026	26734	27427	40770	43751	38370	29991	44902	41253	29574	29627	34648
301	Ile-Lys	4.22e-05	0.000430754	24	0	2731.2	0.0374205	0.249278	26.0177	6.63e-05	17548	2.27e-05	0.000237451	25.0088	3.19e-05	13290.7	3743.3	0.281648	14948	18638	17344	19262	11666	10552	10165	11722	10007	11524	11266	10507	14656	13563	12701	12369	13180.6
302	Ile-Lys	0.0065055	0.0199214	24	0	11537.3	0.0845563	0.331338	24.8451	6.63e-05	65930.4	0.00467868	0.0160528	24.4225	3.26e-05	50672.8	16198.4	0.319666	61513	67799	68296	66114	42339	42192	47222	51077	53407	43246	19228	34662	63298	50238	46636	50077	50459
303	Ile-Met	0.0144977	0.0373217	24	3	4472.98	0.183122	0.504723	28	6.63e-05	33698.7	0.0184018	0.0497827	26	1.62503	27123.1	439.65	0.0162094	31412	41840	31340	30203	27856	25218	27704	29543	23871	27755	27671	20031	23406	26334	20977	18675	27114.8
304	Ile-Phe	0.000987235	0.00453311	24	3	17553.6	0.0784159	0.318818	28	6.63e-05	115707	0.000810251	0.00388753	26	1.62503	89984.1	6948.16	0.0772154	104838	145892	107629	104469	94378	92498	89692	94218	80989	82783	84167	65753	74281	84487	64695	66871	89852.5
307	Ile-Tyr	0.0210199	0.0497627	18	0	2752.77	0.413719	0.844205	28	12	9575.25	0.0499591	0.112259	23	4.92857	9885.65	3269.57	0.330739	12779	14936	12237	12067	8127	7288	8160	8642	8987	10078	11038	8198	10079	10548	7992	8093	9953.06
310	Ile-Val-Arg	0.00980952	0.0273153	24	3	863.908	0.196672	0.525003	21.7778	5.99998	4758.25	0.0139883	0.0392544	22.8889	4.58361	4034.91	693.692	0.171922	3434	5827	4933	4274	4781	4275	6080	3897	2987	3255	3567	2877	3876	3178	3775	3341	4022.31
311	Indole-3-carboxaldehyde	0.00131724	0.00604199	18	9	546.24	0.0348742	0.244995	20	6.00001	1838.75	0.000504773	0.00265251	19	7.60001	1067.41	650.696	0.609601	602	707	409	454	2313	1594	2042	1406	653	932	888	707	662	760	421	482	939.5
312	Inosine	0.0299489	0.0655606	18	12	33268.7	0.332896	0.732811	24.9858	12	893952	0.0559129	0.122957	21.4929	12.3255	844437	87715.6	0.103875	771446	882447	860202	748318	908769	896605	997495	768418	819970	919092	930220	906527	811954	798877	704396	694106	838678
313	Irbesartan	0.000171384	0.00117234	18	9	379.363	0.0614168	0.292556	20	6	2079.5	0.00013117	0.000920528	19	7.6	1592.55	504.504	0.31679	1011	1289	1216	1223	2437	1711	2361	1809	1674	1582	1512	1494	1342	1457	1019	757	1493.38
318	Kynurenic acid	0.00980952	0.0273153	24	0	381.131	0.0479202	0.269626	24.0327	6.63e-05	871.997	0.00407208	0.0143584	24.0163	3.31e-05	573.422	439.375	0.766234	588	726	1003	1171	225	245	396	406	148	310	286	457	1005	826	525	854	573.188
319	Kynurenine	0.000171384	0.00117234	18	0	886.712	0.300334	0.688085	24.9858	17.9999	3385.5	0.000559737	0.00288188	21.4929	18.4883	3125.65	956.963	0.306165	3361	3722	5546	4713	2172	1997	2145	2608	2528	2668	3324	3349	3393	3846	2704	3599	3229.69
325	Leu-Arg	0.00421867	0.0142044	24	3	919.239	0.0691928	0.305476	28	6.63e-05	8292.24	0.00266772	0.0101061	26	1.62503	6238.48	893.476	0.14322	7019	10083	7986	8081	5766	5297	6263	5943	4962	5818	5484	4508	5720	6112	5205	5298	6221.56
328	Leu-Gly-Ile	0.0299489	0.0655606	18	0	1052.88	0.682195	1	28	12	4233.25	0.0999219	0.197104	23	4.92857	4382.12	1361.43	0.310679	6114	6720	5120	4927	4251	3155	3260	3867	4563	4453	4506	3411	4604	5258	3399	2955	4410.19
329	Leu-Gly-Leu	0.0299489	0.0655606	18	0	2186.9	0.563845	1	27.1385	17.9999	8056.25	0.0858046	0.174511	22.5692	18.7693	8250.99	1762.39	0.213597	13039	11480	9166	9729	8120	6250	5860	6704	7829	8631	9231	5468	9914	8934	6920	6457	8358.25
332	Leu-Leu-Arg	0.0299489	0.0655606	24	6	756.604	0.252907	0.617901	23.0287	6	5047.5	0.0445595	0.101709	23.5144	6.00256	4364.01	426.38	0.0977037	4595	5560	4318	4320	5387	4215	5516	5072	4465	4112	4403	2765	4189	3933	3765	3102	4357.31
333	Leu-Leu-Lys	0.0065055	0.0199214	24	6	1580.38	0.143095	0.436098	23.1496	6	9074.5	0.00742799	0.0233067	23.5748	6.00195	7499.04	1164.71	0.155315	7082	8932	8581	7481	10287	8029	8864	9118	8675	6628	7500	4426	6831	5932	5739	5623	7483
334	Leu-Lys	0.000987235	0.00453311	24	3	3044.09	0.0650453	0.297456	27.6489	5.88e-05	19760	0.0006841	0.00339307	25.8245	1.61406	16203.9	2906.28	0.179358	15915	24048	19014	20063	17712	16362	17318	17757	13375	14750	14256	11988	14927	15250	12621	13045	16150.1
336	Leu-Pro	0.00164724	0.00683195	18	0	30483.4	0.142752	0.436098	20	17.9999	115932	0.00219987	0.00861751	19	18.05	99970.2	26251.4	0.262592	147073	130128	141850	112414	77933	68614	73287	58622	103827	118990	107164	87154	131511	138662	99222	94334	105674
337	Leu-Pro-Arg	0.0419656	0.0850707	18	15	5034.6	0.300647	0.68842	20	12	24270.2	0.0677868	0.144163	19	13.6167	19632.8	6778.34	0.345255	19930	20060	21030	18419	11865	13623	13227	13465	17685	29809	31049	18538	29216	22012	16572	16575	19567.2
340	Leu-Tyr	0.00267199	0.0100694	18	0	3141.15	0.109213	0.375609	27.3065	18	9554.25	0.00266702	0.0101061	22.6533	18.7929	9923.44	2475.12	0.249421	13967	15428	13377	12256	8652	8104	7618	8275	9635	9154	9127	7230	9641	11512	8490	8574	10065
343	Leu-Val-Lys	0.00164724	0.00683195	24	6	2961.36	0.0665271	0.301005	26.4865	6	23178.8	0.00110888	0.00500151	25.2432	6.01459	20824.8	1379.21	0.066229	23018	22514	24776	20501	25543	22857	24312	20003	21127	19813	19090	18633	19425	18074	17359	17074	20882.4
351	Lys-Ile	0.0144977	0.0373217	18	9	27297.9	0.239534	0.598489	23.6461	6.00002	122489	0.023138	0.0601004	20.8231	7.84761	103035	22409.2	0.217492	70599	79534	86014	78478	119673	119927	126703	123653	136869	110597	107600	78955	117695	94401	77712	70734	99946.5
353	Lys-Leu	0.000987235	0.00453311	24	9	2510.05	0.0837674	0.330198	21.1511	5.99999	29518	0.000860086	0.00406482	22.5755	7.43495	26320.7	3225.81	0.122558	21773	25195	24196	25637	30737	27611	27602	32122	26524	29419	26773	24833	24481	24226	24059	22836	26126.5
356	Lys-Phe	0.0144977	0.0373217	24	3	1145.16	0.148591	0.444554	24.9858	6.63e-05	9260.25	0.0153819	0.042722	24.4929	1.53084	8263.74	917.549	0.111033	7704	10650	9402	9285	8865	8082	9063	9350	8059	7609	7092	6669	6654	8288	7599	7736	8256.69
364	Maltotetraose	4.22e-05	0.000430754	18	9	2481.24	0.0473736	0.268862	24.0327	6.00001	5429	2.82e-05	0.000275843	21.0163	7.87756	3515.19	2473.89	0.703771	771	830	1241	1052	4559	5094	4092	7971	6139	3253	4752	3816	2270	1472	2244	1529	3192.81
366	Mandelic acid	0.00421867	0.0142044	18	9	3095.36	0.105461	0.371371	20	6	25405.5	0.00387852	0.0137882	19	7.6	9547.21	11662.5	1.22156	632	182	77	174	30845	38016	4387	28374	3471	944	482	362	6601	730	312	485	7254.62
369	Met-Arg	0.0065055	0.0199214	24	3	4072.94	0.163883	0.472132	27.3065	5.97e-05	26652.5	0.0083625	0.0257536	25.6533	1.60336	21772.2	4155.13	0.190846	22976	34975	25380	23279	20844	22427	26070	23681	21658	18219	18339	14078	21388	18271	18401	17180	21697.9
374	Methionine	0.0419656	0.0850707	18	0	32018.5	0.322363	0.71749	20	17.9999	174419	0.0717396	0.150886	19	18.05	154499	26964.5	0.174529	208161	190479	186124	149561	133548	118575	107011	96655	145562	192830	199062	140479	208333	206360	149207	133777	160358
376	Methioninesulfoxide A	0.0419656	0.0850707	18	9	12966.2	0.511223	0.959266	20	6	74927.5	0.103876	0.203715	19	7.6	61978.1	14387.1	0.232132	41081	50439	52389	44237	99714	78379	51458	70159	63124	61123	61475	62413	76879	50335	34655	48539	59149.9
378	Methohexital	8.77e-05	0.000728787	18	0	9076.6	0.0983076	0.35831	20	17.9999	30443.2	0.000109149	0.000801254	19	18.05	25639.2	7611.21	0.296858	38356	32207	38027	31638	18391	17241	18069	14973	23191	30106	29043	23672	31253	37846	25416	27258	27292.9
379	Methyl .alpha.-D-mannopyranoside	0.000171384	0.00117234	24	9	8313.1	0.015812	0.240485	20	6	81301.5	3.74e-05	0.000342765	22	7.425	29254.5	36491.7	1.24739	5891	5980	7599	4989	71722	93888	86173	73423	7780	14566	16889	7519	5789	5712	6155	4995	26191.9
383	Methylsuccinic acid	0.0299489	0.0655606	24	6	647.71	0.142007	0.43566	20	6	4197.5	0.0274747	0.0687747	22	6.05	3266.76	779.953	0.238755	2392	3094	4125	3068	4120	4156	3451	5063	2340	2882	2818	3106	3344	2718	2153	2664	3218.38
384	Met-Ile	0.00421867	0.0142044	24	3	7212.14	0.0524298	0.278212	28	5.45e-05	44278.5	0.00208278	0.00827381	26	1.62503	35609.7	4077.97	0.114518	42162	53717	40001	41234	41077	38168	36508	38357	33178	31657	34050	24070	30121	31645	24423	28152	35532.5
385	Met-Lys	0.00421867	0.0142044	24	3	2149.78	0.0803196	0.322321	24.9858	6.63e-05	11960	0.00304618	0.0112735	24.4929	1.53084	10001.3	1825.61	0.182538	10600	14161	11385	11694	10556	10003	11645	12318	9984	7849	8632	6366	10189	8523	8136	7755	9987.25
391	Monosaccharide 01	2.22e-07	1e-05	18	9	14389.1	0.0217084	0.240485	20	6	38308	9.71e-08	6.62e-06	19	7.6	22963.6	16200.7	0.705494	5978	6589	7641	8556	38603	35093	43814	35722	17076	23142	22874	24875	11530	12040	10022	12908	19778.9
392	Monosaccharide 02	2.89e-06	6.22e-05	18	9	4152.31	0.0319579	0.242768	20	6.00001	14856.2	1.59e-06	3.5e-05	19	7.60001	11110.9	4243.49	0.381921	6038	6931	7689	6669	15481	14188	16689	13067	9283	11173	12565	12093	7335	8524	9072	7631	10276.8
399	N,N-Dimethylarginine	0.00421867	0.0142044	24	18	53918	0.0304759	0.240485	20	17.9999	335098	0.00128041	0.00557765	22	18.15	288191	47615.1	0.165221	271868	290784	319282	300418	215209	206358	228726	195627	311408	340337	319969	332000	389836	360589	288651	301318	292024
401	N-.alpha.-Acetyl-L-arginine	0.00980952	0.0273153	18	0	1358.88	0.460781	0.901166	24.8451	17.9999	5613.75	0.0289248	0.0716911	21.4225	18.4714	5274.27	1224.81	0.232223	7380	6330	7910	5665	3337	3733	4147	5198	4853	5037	5203	5333	7209	6306	4730	4210	5411.31
402	N-.alpha.-Acetyl-L-ornithine	4.22e-05	0.000430754	18	9	2873.68	0.0371399	0.248556	24.1644	6.00001	6288.25	2.25e-05	0.000237109	21.0822	7.8879	4331.01	2516.31	0.580999	1727	1724	1655	1324	7481	6727	6027	4918	6519	5692	5484	3538	4039	2440	2766	2093	4009.62
406	N-[3-[Acetyl(hydroxy)amino]propyl]acetamide	0.00164724	0.00683195	24	3	1036.09	0.046403	0.265072	23.7736	6.06e-05	4979.5	0.000800986	0.00385363	23.8868	1.49295	3780.81	1428.19	0.377748	5898	4802	5100	4118	4017	4192	4297	3634	2423	2830	2844	2141	4434	4103	2977	2730	3783.75
407	N2-(1-Oxo-4-phenylbutyl)-L-glutamine	0.00267199	0.0100694	18	15	4265.62	0.20192	0.535158	20	12	17915.8	0.00459938	0.0158395	19	13.6167	16190.6	4027.71	0.248769	17101	18646	18942	18847	10782	12902	12436	12280	15505	19364	19534	17260	17498	16625	14386	16317	16151.6
409	N6-Isopentenyladenosine	0.0144977	0.0373217	18	15	4893.53	0.59937	1	20	12	10818.2	0.0499268	0.112244	19	13.6167	8318.82	5138.15	0.617653	10378	13768	11969	8048	3514	4014	4690	2820	10237	13653	11321	8062	10993	8835	5752	4251	8269.06
418	N-Acetylmethionine	0.0210199	0.0497627	24	3	25559.1	0.192193	0.51818	27.8233	6.63e-05	141550	0.0263058	0.066806	25.9117	1.61951	95794.5	24282.3	0.253483	147975	159013	150167	109048	96234	108817	99603	45909	27210	74081	68439	112064	59208	84781	93995	88883	95339.2
427	Nicotinic acid	0.0144977	0.0373217	18	15	127321	0.921199	1	20	12	648889	0.0709946	0.149662	19	13.6167	582267	138439	0.237758	641821	692655	773288	560458	490114	509796	436492	447580	572421	643424	748472	631238	609042	570623	485371	482028	580926
433	N-Methyllysine	0.0299489	0.0655606	24	15	236.527	0.286084	0.664563	22.3291	12	1737	0.0493489	0.111176	23.1646	13.4634	1476.84	271.355	0.18374	890	1259	1370	1543	1329	1324	1008	1448	1472	1696	1652	2128	1500	1438	1542	1971	1473.12
434	N-Methylvaline	0.0065055	0.0199214	18	0	66769.8	0.489329	0.935215	20	12	390268	0.0214869	0.0565674	19	15.2	366147	89905.1	0.245544	462214	466659	470260	372951	310315	267036	340521	252709	372792	447791	407402	333087	413481	378319	343959	364666	375260
436	N-omega-Acetylhistamine	0.0359573	0.0786338	24	3	1619.27	0.312076	0.704845	26.8085	6.63e-05	8183.74	0.0616048	0.132777	25.4043	1.5878	6055.89	1741.92	0.28764	8631	7705	9140	7259	3889	5639	7705	6483	2721	3073	4086	8365	5259	5729	4845	5903	6027
437	N-omega-Acetylhistamine	0.0144977	0.0373217	24	3	9795.9	0.292502	0.675028	25.8651	6.72e-05	65524.7	0.0274073	0.0687747	24.9326	1.55832	49447.9	15832.6	0.320187	78088	55167	73100	55744	37816	53245	58499	51474	20256	25549	33102	66474	44209	46991	42198	46009	49245.1
444	Ornithine	0.000987235	0.00453311	18	15	16827.7	0.447953	0.885678	20	12	130654	0.00385791	0.0137443	19	13.6167	115860	21324.5	0.184054	104638	126225	117879	129087	102294	94830	76773	122165	132291	132374	128697	129254	125610	112587	104485	111274	115654
451	Pantothenic acid	0.0419656	0.0850707	18	15	51805.8	0.720182	1	20	12	389648	0.135977	0.253785	19	13.6167	320511	84660.5	0.264142	294854	335734	377401	315405	274286	317575	246464	262064	283988	386797	461300	426508	313446	306904	242029	270299	319691
462	Phe-Lys	0.000987235	0.00453311	24	3	5163.29	0.0700611	0.306266	27.1385	6.68e-05	32051.7	0.000731715	0.00359221	25.5692	1.59811	24487.1	6036.32	0.24651	30143	38738	29858	29468	23588	24273	28530	22397	20369	20737	21969	13630	25488	23395	17786	19735	24381.5
463	Phe-Met	0.000987235	0.00453311	24	3	2321.08	0.0436876	0.259319	28	5.32e-05	13793.2	0.000476642	0.00252614	26	1.62502	11014.4	1609.57	0.146134	12880	16878	12463	12952	12428	12099	11395	11521	9909	9219	10321	7799	9128	10206	8311	8233	10983.9
465	Phenylalanine	0.0299489	0.0655606	18	15	79084.2	0.894738	1	20	12	487437	0.123786	0.235188	19	13.6167	432882	95361.5	0.220295	494937	453324	545012	406518	381543	355383	385415	313057	445630	545974	544038	414107	490216	416684	369094	350396	431958
468	Phe-Phe	0.00267199	0.0100694	24	3	4031.92	0.0880615	0.337738	28	6.63e-05	25610.2	0.00220115	0.00861751	26	1.62503	19710.9	1346.47	0.0683107	23215	32064	22489	24673	20586	18469	21464	20216	17707	17060	19782	14208	17005	17900	13809	14320	19685.4
472	Phe-Tyr	0.00164724	0.00683195	24	3	2849.29	0.0636199	0.295116	28	6.63e-05	22348.2	0.00106511	0.00482417	26	1.62503	16521.8	1889.01	0.114334	19596	27906	20700	21191	16203	14865	16195	15901	14238	14040	15248	11829	14030	14718	13231	13886	16486.1
478	Pramipexole	8.77e-05	0.000728787	18	9	2042.12	0.0595997	0.288665	23.9024	6.00001	3919.25	6.88e-05	0.000553625	20.9512	7.8674	2469.35	1889.97	0.765374	604	490	970	321	4302	4673	3529	3173	1993	3528	5522	1866	1651	1123	1095	652	2218.25
479	Pro-Ala	0.00267199	0.0100694	24	21	6793.53	0.0670333	0.301708	20	17.9999	34146.2	0.00172441	0.00714515	22	19.525	29495.1	6697.5	0.227072	30809	34660	42913	34271	22045	19477	24578	19483	25015	32006	29132	30843	30506	36494	34279	35306	30113.6
480	Pro-Arg	7.77e-06	0.000118884	18	0	774.989	0.112612	0.379919	20	17.9999	3527.25	1.31e-05	0.000154172	19	18.05	3216.77	673.576	0.209395	3744	4146	4345	4428	2745	2522	2093	2685	3333	3175	3127	3358	3896	3455	3235	3523	3363.12
483	Pro-Gln	0.00267199	0.0100694	18	0	27232.8	0.0515166	0.276073	20	17.9999	135411	0.00136149	0.00586591	19	18.05	113718	26637.8	0.234244	145300	127312	163420	130036	76272	85366	83099	77224	125370	133800	116929	106324	154774	133004	134098	119768	119506
488	Pro-Ile	1.91e-05	0.000238238	18	0	9039.65	0.238193	0.595827	25.4179	17.9999	32313.2	6.05e-05	0.000497926	21.7089	18.5412	31057.7	8163.8	0.262859	42296	39309	48681	37051	24721	23371	24728	18879	27362	32781	32657	28768	33792	35222	28900	31339	31866.1
492	Pro-Met	0.00421867	0.0142044	18	0	3548.97	0.258079	0.623943	24.7059	18	12649.5	0.00851699	0.026155	21.3529	18.455	11464.6	3370.43	0.293985	18819	13950	17367	12254	9568	8294	9302	6710	11286	11779	11766	7944	14179	15060	10840	10519	11852.3
493	Pro-Phe	4.22e-05	0.000430754	18	0	2341.41	0.112171	0.379919	20	17.9999	9521.5	6.27e-05	0.000515527	19	18.05	8504.01	2072.18	0.243671	11198	11295	12210	10675	6016	5836	7624	5315	8334	9640	8918	8121	9143	11012	8550	9381	8954.25
497	Pro-Thr	4.22e-05	0.000430754	18	0	8899.65	0.02308	0.240485	20	17.9999	41852.2	1.44e-05	0.000167471	19	18.05	33485.7	10309.2	0.30787	39126	45987	46853	44401	19874	18492	19997	19154	33474	38623	39973	38247	43282	43316	38952	41859	35725.6
498	Pro-Trp	0.000572095	0.00298095	18	0	2838.68	0.276183	0.650637	20	18	9196.5	0.00154098	0.00648441	19	18.05	8447.62	2188.18	0.25903	12191	11221	13309	10238	6267	6451	6084	4768	8826	9261	10025	7342	10587	10782	8339	7078	8923.06
499	Pro-Tyr	0.0210199	0.0497627	18	0	1009.39	0.657613	1	20	18	6066.75	0.0730048	0.153154	19	18.05	5818.95	815.438	0.140135	7905	6818	8039	5551	5043	4738	5443	4318	5976	6705	6153	4982	6625	6859	5610	5173	5996.12
500	Pro-Val	0.00164724	0.00683195	18	0	6642.74	0.059313	0.288288	20	17.9999	35165	0.00099985	0.00459591	19	18.05	30804.8	6424.24	0.208547	38400	38231	41655	34838	23981	21657	23531	20401	32381	34128	35238	30109	37917	38819	31858	32066	32200.6
504	Pyridoxamine	0.00267199	0.0100694	24	12	1472.2	0.0794677	0.320517	20	12	7770	0.00200814	0.00803629	22	12.1	5859.66	2255	0.384835	4610	4545	4804	3944	5852	5649	6067	6133	6610	8344	9352	6774	6297	5524	3664	3457	5726.62
505	PyroGlu-Lys-Lys	0.00164724	0.00683195	18	9	3829.51	0.295407	0.679657	24.4321	6.00002	14409.8	0.00419847	0.0147082	21.2161	7.90913	11642.4	3807.96	0.327077	7523	6788	6656	8642	13008	12270	11283	21078	19412	10234	12467	11509	12205	8184	9437	8126	11176.4
508	PyroGlu-Pro	0.0065055	0.0199214	18	0	1020	0.086209	0.333846	20	17.9999	7232.25	0.00475927	0.0162076	19	18.05	6167.02	1065.38	0.172755	7467	6839	7630	6473	4934	5436	4479	4823	7001	6410	6818	5137	8534	6820	7148	6427	6398.5
513	Quinolone	0.0419656	0.0850707	18	12	453.609	0.312541	0.704845	23.1496	12	1166.75	0.0699596	0.147985	20.5748	12.1909	776.825	466.732	0.600821	337	318	412	417	916	524	469	1523	1602	1073	1324	668	1000	766	268	152	735.562
518	Ribose-5-phosphate	0.00421867	0.0142044	24	18	391.207	0.0375502	0.249379	20.2759	17.9999	1773.75	0.00154456	0.00649317	22.1379	18.1282	1302.35	513.205	0.394059	1092	1563	1494	1728	797	836	351	586	1628	1290	1164	1821	2027	1647	1869	1552	1340.31
525	Ser-Asp	0.00421867	0.0142044	24	12	543.058	0.25732	0.623501	22.7907	12	2733.25	0.00849515	0.0261064	23.3953	12.008	1987.11	771.509	0.388256	1303	1377	1273	1318	1807	1941	1353	2791	3901	2362	2669	2001	2726	1568	1591	1573	1972.12
526	Ser-Glu	0.0065055	0.0199214	24	15	733.8	0.349121	0.756181	22.3291	12	4648.5	0.016097	0.0443667	23.1646	13.4634	3555.45	1300.87	0.365879	2513	2455	2529	3015	2965	3173	2207	4600	6453	3252	4918	3971	4770	3239	3261	3281	3537.62
530	Serine	0.0299489	0.0655606	24	21	2594.02	0.159223	0.463955	20	17.9999	25817	0.0302599	0.0745062	22	19.525	23735.9	2646.31	0.11149	27211	25563	27658	22928	21164	20180	17912	18887	24122	25073	27631	22087	28385	28709	23376	22798	23980.2
535	Ser-Pro	0.00421867	0.0142044	24	21	8441.44	0.0336054	0.244945	20	17.9999	45363.7	0.00139804	0.00598173	22	19.525	38697.4	8109.5	0.209562	42435	43744	51598	42133	25925	26259	29710	25984	41493	43218	40956	36230	50945	47011	40107	43392	39446.2
542	Sibutramine	0.0144977	0.0373217	24	9	35.8857	0.298616	0.685357	25.1282	6.00001	394	0.0278906	0.0694858	24.5641	7.53843	362.998	38.8805	0.10711	336	333	372	383	387	375	432	382	343	430	424	347	367	303	296	313	363.938
545	Stearoyl-L-carnitine	0.0299489	0.0655606	18	0	5813.12	0.917658	1	20	12	26613.8	0.126262	0.238844	19	15.2	25852.3	7573.71	0.292961	33588	37755	35862	28188	25295	23573	23012	8447	22448	28295	24761	30951	15450	32109	30080	26105	26619.9
552	Thiamine cation	0.00164724	0.00683195	24	12	4625.19	0.0247491	0.240485	23.7736	12	15368.2	0.000452833	0.0024207	23.8868	12.0003	10870.5	6417.96	0.590404	7378	7194	7335	6432	12251	13403	12855	15649	13121	13569	19970	14813	9387	7466	5885	6840	10846.8
557	Threonine	0.0210199	0.0497627	18	15	30387.4	0.147711	0.44293	20	12	122124	0.0210348	0.055707	19	13.6167	111617	29966.5	0.268477	123444	136807	142905	120740	78096	74715	89578	73204	113038	127159	130102	118195	121018	118869	107439	105915	111326
573	Tiliroside	0.0144977	0.0373217	18	9	15.5563	0.0386732	0.251167	20	6	55	0.00475809	0.0162076	19	7.6	27.9459	20.7089	0.741034	11	13	11	17	52	57	77	34	11	19	16	16	14	8	12	14	23.875
576	trans-Traumatic acid	8.88e-07	2.53e-05	18	0	7209.48	0.0507516	0.27435	24.4321	17.9999	13884.2	8.07e-07	2.32e-05	21.2161	18.4233	10776.7	7134.09	0.66199	15029	23529	20964	17158	4838	4610	5275	3682	8604	9019	9389	8628	16307	12880	13308	13042	11641.4
592	Tyr-Arg	0.0065055	0.0199214	24	6	7422.5	0.0500957	0.273235	22.9091	6	42049.5	0.0029425	0.0109924	23.4545	6.00325	35810.4	2875.2	0.0802894	35303	46331	38381	41401	41994	35386	49604	41214	32055	31344	29347	28436	29256	31448	30766	29891	35759.8
604	unknown100	0.000779665	0.00403822	24	9	784.889	0.0723757	0.309365	22.4427	5.99999	6140	0.000608445	0.00307059	23.2214	7.45808	5051.65	881.909	0.174578	4293	5535	5117	4473	5512	5923	7458	5667	5512	4810	5063	4614	4311	4098	3808	4165	5022.44
605	unknown1000	0.0210199	0.0497627	18	15	604.046	0.964599	1	20	12	4807.75	0.0993173	0.196098	19	13.6167	4491.07	729.698	0.162478	5029	5114	5316	4531	4199	3781	4221	3350	4306	5311	4972	4642	4624	4483	3572	4293	4484
615	unknown101	8.77e-05	0.000728787	24	9	1177.33	0.0611066	0.292362	21.3559	5.99998	8966	7.04e-05	0.000563404	22.678	7.43782	7342.65	1315.32	0.179134	6267	7630	7199	6460	8405	8412	10776	8271	8081	6798	7355	6539	6120	6366	5561	6065	7269.06
616	unknown1010	0.000320124	0.00187824	18	0	1341.74	0.0765136	0.315468	28	18	3451	0.000284547	0.00166499	23	18.8928	3802.12	1119.32	0.294394	4753	6424	5760	5688	3267	3048	3142	2690	3367	3368	3254	3024	3343	3591	3560	3310	3849.31
628	unknown1021	0.0419656	0.0850707	18	15	568.514	0.851483	1	20	12	4562.75	0.154784	0.282195	19	13.6167	4171.46	679.625	0.162923	4285	4562	4878	4022	3579	3173	4511	3176	4613	4740	4796	4102	4194	4662	3648	3697	4164.88
629	unknown1022	0.00980952	0.0273153	18	15	3669	0.429842	0.862085	20	12	23871.5	0.0272757	0.0686252	19	13.6167	21652.8	4307.53	0.198936	23738	23123	25719	21510	18326	15573	20507	16225	23631	24256	25623	21976	21021	25282	19500	19768	21611.1
631	unknown1024	0.0299489	0.0655606	18	15	1127.84	0.448809	0.886052	20	12	5583.75	0.0713658	0.150226	19	13.6167	5215.04	1075.15	0.206164	6407	5862	6505	4961	4267	3883	4679	3366	5255	6130	6022	4928	5784	5779	4871	4575	5204.62
643	unknown1035	0.0299489	0.0655606	18	0	1016.47	0.548199	1	27.3065	17.9999	4346	0.0838857	0.171015	22.6533	18.7929	4455.27	781.033	0.175306	5807	6076	5762	4770	4144	3484	3668	3641	4147	4783	4813	3520	5160	4951	3656	3617	4499.94
658	unknown1049	0.00267199	0.0100694	18	15	1852.09	0.32803	0.726161	20	12	7330	0.00704665	0.0223859	19	13.6167	6195.25	2162.25	0.349017	7094	7501	8351	5558	3482	3815	4052	5585	7666	6630	7361	7663	6567	6326	5548	5590	6174.31
663	unknown1053	0.000572095	0.00298095	18	15	995.96	0.383483	0.80333	20	12	5358.5	0.00206767	0.00822885	19	13.6167	4608.06	1193.21	0.258941	5109	5502	5164	4158	3660	3493	3796	3751	5064	5535	5940	4895	4650	4742	4201	3884	4596.5
664	unknown1054	0.0419656	0.0850707	18	15	7115.97	0.339854	0.743593	20	12	22878.8	0.0748786	0.156139	19	13.6167	20425.7	6422.7	0.314442	27208	26687	24993	18026	14478	14926	10854	13793	20098	24246	26459	20712	25289	22882	17764	17401	20363.5
665	unknown1055	8.77e-05	0.000728787	18	9	5077.73	0.121169	0.396868	20	6	17249.8	0.000132309	0.000927019	19	7.6	11162.1	5948.46	0.532917	6743	4726	5947	3810	18617	13989	24940	11453	8216	11109	11842	8985	6121	8930	8623	5833	9992.75
669	unknown1059	0.0210199	0.0497627	24	6	1128.9	0.105567	0.371371	28	5.93e-05	8565.75	0.0157787	0.043684	26	3.25003	7218.93	99.2949	0.0137548	9195	9571	8581	6916	8290	7525	7413	7028	6901	7216	6279	6382	6352	6756	5915	5157	7217.31
670	unknown106	0.000987235	0.00453311	24	9	572.403	0.101889	0.365819	23.9024	6.00001	4093.25	0.00102645	0.00468337	23.9512	7.49698	3459.17	618.856	0.178903	2938	3719	3172	3319	3562	3786	4914	4111	4110	3314	3859	3196	2977	2752	2925	2672	3457.88
672	unknown1061	0.0419656	0.0850707	18	15	2411.76	0.904093	1	20	12	19802	0.162073	0.29192	19	13.6167	17653.1	3110.68	0.176212	19107	18509	20819	15970	15173	14558	17638	15303	19695	21359	19353	18801	16348	19925	14603	14806	17622.9
676	unknown1065	0.0065055	0.0199214	24	6	366.635	0.0752053	0.313776	25.5652	6	3808.5	0.00421861	0.0147668	24.7826	6.00599	3417.9	366.164	0.107131	3552	3792	3680	3062	4109	3754	3728	3643	3253	3774	3427	3209	3136	3003	2774	2943	3427.44
681	unknown107	0.00421867	0.0142044	24	9	511.945	0.143419	0.436098	22.2166	6	4667.25	0.00508849	0.0170667	23.1083	7.45321	3909.35	601.323	0.153817	3405	4353	3910	3433	4365	4121	5749	4434	4229	3488	4042	3632	3508	3470	2820	3226	3886.56
687	unknown1075	0.0419656	0.0850707	18	0	548.715	0.881439	1	28	12	4004.25	0.15895	0.287852	23	4.92857	3972.56	821.774	0.206863	4634	5616	4474	4274	3798	3424	3175	3603	3865	4246	4220	3686	4088	4308	3376	3045	3989.5
688	unknown1076	0.00815751	0.0249449	18	0	1167.79	0.109055	0.375609	28	18	4991.75	0.00713895	0.0225797	23	18.8928	5370.45	832.881	0.155086	6798	7657	6692	6272	5246	4550	4508	4904	4939	4937	5263	4756	5351	4939	5013	4664	5405.56
695	unknown1082	0.00164724	0.00683195	18	0	1194.66	0.1129	0.379919	20	17.9999	4732.5	0.00178347	0.00731289	19	18.05	4173.07	950.368	0.227738	5485	5887	5154	4906	2921	2665	3325	2733	3873	5532	4608	4054	5128	5125	4563	4114	4379.56
696	unknown1083	0.00267199	0.0100694	18	0	1736.3	0.106221	0.371371	20	17.9999	7351.75	0.00260185	0.00991725	19	18.05	6468.53	1485.57	0.229662	8578	9414	7830	7449	4751	4287	5077	4015	6107	8247	7165	6334	8063	7840	6902	6602	6791.31
699	unknown1086	0.00980952	0.0273153	18	0	743.169	0.259733	0.626893	20	17.9999	4061	0.017765	0.0482877	19	18.05	3729.33	578.661	0.155165	4849	4964	4117	3864	3233	2794	2941	2575	3354	4779	4358	3609	4434	4399	3608	3803	3855.06
710	unknown1096	8.77e-05	0.000728787	18	9	2557.61	0.0447094	0.26161	20	5.99999	9335	5.27e-05	0.000440764	19	7.59999	7124.54	2596.53	0.364448	3915	4573	5184	4267	9607	9062	10911	7760	5747	7612	8039	8031	4499	5881	5648	5090	6614.12
711	unknown1097	8.88e-07	2.53e-05	18	9	11571.1	0.0378979	0.250149	20	5.99999	37637	6.13e-07	1.94e-05	19	7.59999	28561.2	11105.3	0.388826	14212	16286	19486	16637	40987	35493	40973	33095	24172	28761	34707	32556	19598	23137	21979	19971	26378.1
716	unknown1100	0.00980952	0.0273153	18	0	902.622	0.793861	1	28	12	5949	0.0455971	0.10375	23	4.92857	5967.89	1505.83	0.252321	6781	8752	6407	7179	5620	5043	4206	5432	5564	6141	6346	5745	6396	6408	5217	4746	5998.94
723	unknown1107	0.000320124	0.00187824	24	12	793.02	0.0581141	0.286613	24.5682	12	4272.5	0.000221238	0.00136422	24.2841	12.0016	3594.54	965.003	0.268464	2361	2730	3264	2760	3931	3527	5030	3789	4280	4033	4556	4221	2839	3622	3169	3545	3603.56
727	unknown1110	0.000987235	0.00453311	18	0	732.386	0.203527	0.53769	20	17.9999	5534.25	0.00191135	0.00770591	19	18.05	5149.45	688.589	0.133721	5365	6318	6775	5724	4609	4423	4702	3704	4914	5278	5343	5493	5445	6120	5082	5490	5299.06
735	unknown1118	4.22e-05	0.000430754	24	6	658.847	0.0252098	0.240485	21.995	5.99998	4472	1.57e-05	0.000178769	22.9975	6.01141	3539.14	817.647	0.23103	3394	3582	3716	3565	4890	4876	3924	4198	2749	3416	3677	3201	3014	2673	2717	2616	3513
737	unknown112	0.0299489	0.0655606	24	6	567.984	0.181272	0.502036	20.8511	6.00001	5637.75	0.0337461	0.0816773	22.4255	6.02973	4628.81	925.592	0.199963	4029	4279	4860	4824	5864	4850	6762	5075	3487	4602	5088	4105	3444	4161	3253	4646	4583.06
742	unknown1124	0.0065055	0.0199214	18	0	1374.79	0.204289	0.538387	26.1721	18	5508.25	0.0101314	0.0301505	22.0861	18.6379	5363.28	1326.02	0.247241	6436	8689	6651	6999	4657	4865	3374	4510	4237	5108	5236	4761	6640	6116	4695	4582	5472.25
758	unknown1139	0.00267199	0.0100694	24	6	285.848	0.107739	0.374128	25.4179	6.00001	3182	0.00263494	0.0100257	24.7089	6.00495	2869.11	231.547	0.0807036	2798	3025	3021	3273	3633	2963	2941	3191	2877	2802	2597	2810	2263	2379	2719	2701	2874.56
760	unknown1140	0.0299489	0.0655606	24	0	823.426	0.464559	0.905692	26.4865	6.63e-05	9253.49	0.0733904	0.153814	25.2432	3.16e-05	7834.87	1159.49	0.147991	8314	9967	9702	9031	8911	7768	4672	7225	5734	7472	7991	7024	8076	7826	7195	7797	7794.06
767	unknown1147	0.000987235	0.00453311	24	0	483.307	0.157682	0.461732	25.2722	6.63e-05	3409.99	0.00152054	0.00641085	24.6361	3.23e-05	2745.03	665.725	0.24252	3231	4219	3178	3012	2603	2597	1656	2832	1998	2435	2346	2312	2534	3111	3031	2619	2732.12
783	unknown1161	0.0299489	0.0655606	24	3	924.896	0.160289	0.465123	24.2975	4.68e-05	5700	0.0304304	0.0748657	24.1488	1.50932	4532.61	1374.6	0.303268	4682	5245	6837	6036	5446	4851	3395	4886	2993	2941	3552	4137	3723	3579	4711	5452	4529.12
784	unknown1162	1.91e-05	0.000238238	18	9	4348.71	0.113707	0.381372	20	6	13997.8	3.05e-05	0.000295918	19	7.6	6920.32	6203.69	0.896445	1405	2319	2140	1485	10695	8523	25336	11437	6012	4872	5179	2992	1675	2570	2302	2271	5700.81
785	unknown1163	4.22e-05	0.000430754	18	9	5520.91	0.0404374	0.254724	20	6	14039.5	2.44e-05	0.000248764	19	7.6	7167.36	6424.53	0.89636	1514	2105	2063	1775	11450	10088	21575	13045	5784	5968	6373	4613	1816	2015	2086	2201	5904.44
792	unknown117	0.0210199	0.0497627	18	9	3180.57	0.155944	0.460286	20	6	21060.2	0.0220295	0.0577058	19	7.6	13097.9	5649.92	0.431361	6684	6626	13428	7656	31601	18035	20270	14335	8636	9107	9089	7746	7714	7495	10270	13104	11987.2
796	unknown1173	0.0144977	0.0373217	24	0	759.256	0.492337	0.937476	26.1721	17.9999	6399	0.0424152	0.0976383	25.0861	21.1695	6423.51	979.968	0.15256	7169	8328	7027	8129	6692	5716	3358	6511	4893	6340	6004	6238	6789	6879	5833	6095	6375.06
797	unknown1174	0.0299489	0.0655606	18	0	1617.51	0.740675	1	28	12	10519.2	0.106663	0.207905	23	4.92857	10833.3	2069.13	0.190997	11785	15340	12709	12830	11031	9437	7450	11257	9616	11263	11299	9899	11333	11750	8812	8205	10876
803	unknown118	0.0065055	0.0199214	18	6	1982.02	0.0363221	0.247108	20	6	11634.8	0.00220944	0.0086266	19	6.01667	9626.06	1745.33	0.181313	8293	10381	9159	10314	11988	11896	11864	10791	8656	7427	8143	6216	9004	8515	8361	9625	9414.56
814	unknown119	0.0299489	0.0655606	24	3	1535.13	0.237361	0.594216	20	5.99997	7650	0.0422715	0.0973592	22	4.67498	6282.82	1578.63	0.251262	5308	6917	8453	7268	10531	6273	7620	6176	3428	4666	5139	3963	5713	5745	4704	7846	6234.38
826	unknown120	0.00164724	0.00683195	24	9	2975.15	0.319044	0.713656	21.3559	6	13037.5	0.00449395	0.0155298	22.678	7.43783	7785.61	4569.69	0.586941	4703	6365	7642	4433	7554	7494	24241	12861	11022	8996	6188	4788	4530	4220	3284	2158	7529.94
848	unknown122	0.00980952	0.0273153	24	9	1894.69	0.416254	0.846187	24.0327	6	7751.5	0.0265446	0.0670194	24.0163	7.50102	5444.97	2634.24	0.483794	3591	4336	5857	3363	4989	4630	13937	7450	8498	8413	5095	4416	3701	3548	2819	2506	5446.81
854	unknown1225	0.0210199	0.0497627	24	0	1722.87	0.156447	0.460826	26.9725	17.9999	7283.25	0.0220899	0.057829	25.4862	21.2472	7781.84	2012.31	0.25859	9824	11972	9819	10990	7081	7259	3198	7218	5368	6683	7254	6551	8460	7100	6784	6789	7646.88
855	unknown1226	0.0144977	0.0373217	18	0	704.985	0.681892	1	20	12	4685.75	0.0555255	0.122305	19	15.2	4322.47	945.581	0.21876	4924	5246	5741	4552	3601	3539	3782	3302	3873	5036	5034	4800	4257	5084	4047	3875	4418.31
867	unknown1237	0.00164724	0.00683195	18	0	2683.82	0.576485	1	20	12	8427.75	0.00755838	0.0236473	19	15.2	8191.11	2708.3	0.330639	11381	11930	10776	10097	6938	6151	4955	6444	6614	9818	9243	8036	8654	10570	6849	6994	8465.62
868	unknown1238	0.0210199	0.0497627	18	12	2587.3	0.7155	1	25.5652	12	34385.5	0.0781624	0.161743	21.7826	12.3731	30873.9	5208.32	0.168697	27010	31705	33148	29292	28913	24728	39557	33236	34602	37638	33263	32039	26030	28703	24503	24773	30571.2
873	unknown1242	0.0419656	0.0850707	18	12	2150.31	0.811587	1	26.0177	12	31776.2	0.149166	0.274379	22.0088	12.4118	28649.9	4668.05	0.162934	24949	29432	31468	27888	26701	22246	36581	31236	32388	33459	31431	29827	24704	26039	22051	24104	28406.5
877	unknown1246	0.0299489	0.0655606	18	0	1845.02	0.645097	1	27.4766	12	8872	0.0955685	0.190346	22.7383	4.96531	9111.72	2373.68	0.260509	11167	12813	10446	10625	8638	7882	5717	8664	7568	10198	9817	7905	9492	10069	7978	7792	9173.19
878	unknown1247	0.00980952	0.0273153	18	9	36021.8	0.121752	0.397168	20	6.00002	132106	0.00923238	0.0279358	19	7.60001	62480.1	58461.1	0.935675	3311	20734	19842	15031	141897	143197	209308	34023	47207	50678	43911	7501	17479	22327	19283	20078	50987.9
879	unknown1248	0.000987235	0.00453311	18	9	4423.31	0.104424	0.37048	20	6	11352.2	0.00104945	0.00477325	19	7.6	6975.66	4274.87	0.612826	2881	3433	3066	2135	14132	13828	6565	10884	3877	5596	9478	5807	5059	5833	3003	2588	6135.31
884	unknown1252	0.0419656	0.0850707	18	6	1556.7	0.56857	1	20	6	9872.25	0.112992	0.21871	19	6.01667	4825.79	5356	1.10987	1140	1655	731	2277	14599	15855	397	8638	524	798	2591	1426	7661	2747	2804	2985	4176.75
900	unknown1267	0.00267199	0.0100694	24	3	928.254	0.138708	0.429005	27.1385	6.63e-05	6887.74	0.0032987	0.0120758	25.5692	1.59811	5512.68	1031.79	0.187167	7168	7504	6011	6868	6721	5595	3580	5833	3912	4730	4891	4844	5427	4897	4693	5240	5494.62
904	unknown1270	0.0065055	0.0199214	24	0	565.685	0.226584	0.578483	24.8451	6.63e-05	3718.74	0.0110844	0.0323638	24.4225	3.26e-05	2995.33	787.639	0.262956	3469	3913	3262	4231	3397	3325	1334	2784	2129	2463	2461	2501	3402	2774	3219	3095	2984.94
917	unknown1282	0.00980952	0.0273153	18	0	1601.24	0.335892	0.736784	25.8651	17.9999	6666.5	0.0221267	0.0578904	21.9326	18.5979	6466.16	1393.46	0.215501	8353	9275	7716	7974	5988	5506	3477	6050	4834	6839	6787	5978	7667	7225	5952	5822	6590.19
922	unknown1287	0.0121536	0.0337774	18	0	864.438	0.739778	1	26.0177	17.9999	3574.75	0.0513523	0.11476	22.0088	18.6177	3507.2	783.949	0.223526	4387	5165	4004	4754	3368	3162	1116	3534	1940	3766	4231	3463	3885	3767	3463	3184	3574.31
927	unknown1291	4.22e-05	0.000430754	18	9	5326.46	0.0403299	0.254561	20	6	13715.8	2.43e-05	0.000248736	19	7.6	7432	5688.6	0.765419	2284	3089	3028	2023	12547	11757	19922	10637	5905	6192	6733	4211	3034	3745	3000	2913	6313.75
928	unknown1292	0.000320124	0.00187824	18	0	2033.99	0.179353	0.49942	26.9725	17.9999	6551.75	0.000618087	0.00310478	22.4862	18.7462	6721.41	1802.74	0.268209	8464	11632	8822	8743	5437	4762	4579	6348	5906	6304	6816	5383	6391	6920	6568	6328	6837.69
930	unknown1294	2.22e-07	1e-05	18	0	1648.27	0.0484798	0.27167	24.8451	17.9999	4637.75	2.08e-07	9.49e-06	21.4225	18.4714	4047.39	1579.59	0.390274	5119	6976	5820	5913	2750	2844	2617	2619	3480	3707	3529	3661	4450	5001	4485	4615	4224.12
944	unknown1306	0.0144977	0.0373217	18	0	1128.9	0.71817	1	20	12	4626	0.0579399	0.126643	19	15.2	4398	1328.77	0.302129	5173	6761	5430	5425	3657	3496	2436	3842	3758	5023	5609	4114	5172	5139	3997	3491	4532.69
945	unknown1307	0.00421867	0.0142044	18	0	1134.55	0.643512	1	20	12	4217.5	0.0187564	0.0505385	19	15.2	4054.62	1235.7	0.304764	5042	5941	4905	5474	3326	3189	2387	3540	3292	4696	4665	4217	3760	5021	3937	3486	4179.88
947	unknown1309	0.0210199	0.0497627	18	15	2055.56	0.877952	1	20	12	12184.5	0.0921328	0.184692	19	13.6167	10672.4	2962.09	0.277546	10641	13946	13134	11335	6796	6210	12072	7916	13094	11831	12184	11629	9005	10969	9404	10134	10643.8
948	unknown131	0.0065055	0.0199214	24	9	1665.24	0.488452	0.935215	22.7907	6	6314.25	0.0214541	0.0565406	23.3953	7.46622	3941	2363.23	0.599652	2757	2959	3473	1912	4472	3738	12521	4526	6706	6081	2858	2294	2550	2105	1898	1232	3880.12
951	unknown1312	0.00980952	0.0273153	18	0	1042.45	0.163761	0.472093	24.5682	17.9999	4124.74	0.0119417	0.0342434	21.2841	18.439	3623.77	957.972	0.264358	4464	4695	4367	5294	3511	2875	1512	3794	2716	3147	3178	3739	4773	3770	4405	3551	3736.94
952	unknown1313	0.0419656	0.0850707	18	15	1783.68	0.972408	1	20	12	10183	0.171347	0.305196	19	13.6167	8546.88	2536.48	0.296773	7947	10282	10826	8855	5273	4301	11417	6294	10663	10674	9458	9937	6685	8583	7406	7756	8522.31
953	unknown1314	0.0144977	0.0373217	18	15	4451.06	0.18093	0.501874	20	12	19734.5	0.018213	0.0493816	19	13.6167	18027.6	4629.42	0.256797	20496	21018	23602	18585	12984	12554	14692	12068	18674	21339	19835	19090	19211	19476	17006	17094	17982.8
954	unknown1315	0.00267199	0.0100694	18	0	779.232	0.556529	1	20	12	3103	0.0111691	0.0325672	19	15.2	2868.25	922.429	0.3216	3446	4152	3548	3836	2359	1964	2020	2239	3751	2966	2533	3162	2620	3043	3053	2696	2961.75
960	unknown1320	0.00980952	0.0273153	18	0	3115.16	0.715966	1	28	12	14391.2	0.0418484	0.0965904	23	4.92857	14291.6	4369.03	0.305706	17075	20535	16647	17828	12642	11978	9008	13029	11977	15348	16370	13870	14086	14588	13064	12062	14381.7
963	unknown1323	0.0419656	0.0850707	18	12	315.723	0.620154	1	25.8651	12	4206.75	0.120983	0.23057	21.9326	12.3986	3735.13	737.443	0.197434	3174	3802	4185	3469	3527	2867	4941	4267	4253	4606	3984	3984	2969	3326	2983	2786	3695.19
967	unknown1327	0.0144977	0.0373217	18	0	1200.31	0.511945	0.959266	28	12	6748.25	0.0438145	0.100578	23	4.92857	6828.33	1617.64	0.236901	8041	9393	7852	8171	6482	5950	5151	6070	6405	7031	7171	6386	6802	6951	6427	5504	6861.69
969	unknown1329	0.0419656	0.0850707	18	6	5686.55	0.719709	1	20	6	24149	0.135908	0.253765	19	6.01667	13426.7	11568.9	0.861638	3967	6416	2886	8674	34299	34199	1824	26274	2596	3686	9271	5782	22148	9446	10645	10283	12024.8
972	unknown1331	0.00164724	0.00683195	18	0	662.206	0.308125	0.699256	25.2722	17.9999	3508.75	0.00435783	0.0151076	21.6361	18.5231	3347.61	634.385	0.189504	4019	4352	3896	4355	3255	2973	1761	3141	2837	3120	3402	3454	3835	3717	3403	3080	3412.5
974	unknown1333	4.22e-05	0.000430754	18	0	1428.36	0.085306	0.33277	25.5652	17.9999	4350	4.87e-05	0.000415118	21.7826	18.5596	4070.11	1234.37	0.303277	5140	6118	6108	5413	3469	3332	2217	3475	2855	3696	3939	3850	4927	3742	4434	4297	4188.25
982	unknown1340	0.000572095	0.00298095	18	0	2025.51	0.0780407	0.317889	26.6465	17.9999	4194.25	0.00049186	0.00259359	22.3233	18.7014	4238.35	1616.17	0.38132	5880	8025	6370	6305	3291	3460	2625	3038	2897	3776	4203	3020	3831	4104	4837	4005	4354.19
983	unknown1341	0.0419656	0.0850707	18	15	1029.72	0.982575	1	20	12	6807	0.172709	0.30737	19	13.6167	6219.63	1271.82	0.204485	6627	7830	6829	7023	5162	5167	4482	6099	6203	7010	7223	6792	6028	6965	5241	4636	6207.31
986	unknown1344	0.00164724	0.00683195	24	9	2026.92	0.0608459	0.291906	24.0327	6	14714.5	0.00102313	0.00467317	24.0163	7.50102	12880.7	2186.47	0.169748	9634	12104	12736	12921	15318	14342	13818	15380	12615	13258	13923	15970	10989	10597	11456	11054	12882.2
989	unknown1347	0.000987235	0.00453311	24	18	503.814	0.14568	0.439886	23.9024	17.9999	4491.49	0.0014162	0.00605343	23.9512	18	3461.56	1014.28	0.293013	3239	3314	3196	4022	2925	2521	1174	3079	3839	3367	3112	3657	5950	4490	3865	3661	3463.19
994	unknown1351	0.0144977	0.0373217	18	15	3650.62	0.96923	1	20	12	17039	0.0739821	0.154697	19	13.6167	15290.6	3956.23	0.258736	17098	20074	20101	14982	11981	10647	13914	11979	16575	18350	19001	14230	14305	15895	12119	12786	15252.3
1000	unknown1357	0.0210199	0.0497627	18	0	472.701	0.619575	1	20	17.9999	3969.5	0.069558	0.147279	19	18.05	3723.14	559.138	0.150179	3999	5067	4269	4740	3462	3528	1957	3521	3626	4078	3920	3469	4870	4047	3690	3271	3844.62
1014	unknown137	0.0210199	0.0497627	18	0	1051.47	0.379141	0.798871	20	17.9999	3478.75	0.0464791	0.105479	19	18.05	2978.58	811.967	0.272602	3239	4160	4571	3974	2658	1599	2502	1291	2129	4109	3950	2383	3162	3580	2810	4363	3155
1015	unknown1370	0.0210199	0.0497627	18	0	535.987	0.778151	1	25.5652	17.9999	3403	0.0836334	0.170737	21.7826	18.5596	3316.78	490.741	0.147957	4164	4252	3573	3850	3476	2986	1847	3130	2462	3662	3512	3294	3854	3676	3315	2767	3363.75
1023	unknown1378	0.000171384	0.00117234	18	0	939.391	0.101714	0.365819	20	17.9999	5146.75	0.00020844	0.00130431	19	18.05	4686.27	835.519	0.178291	5418	6003	6097	5571	4097	3794	3632	3183	4775	5285	4677	4766	5720	5295	4538	5034	4867.81
1025	unknown138	0.0144977	0.0373217	18	0	1399.72	0.476159	0.920432	20	17.9999	4231.25	0.041252	0.0955705	19	18.05	3743.9	1011.85	0.270266	3935	5344	6137	5067	3064	2248	2938	1689	2568	4982	5166	3357	3678	4436	3272	5539	3963.75
1035	unknown1389	0.0299489	0.0655606	18	0	4598.32	0.288643	0.667974	20	17.9999	28150	0.0497133	0.111823	19	18.05	25275.4	4202.43	0.166265	25387	32379	33430	29425	18666	15698	26484	18534	22817	24337	29194	30065	24330	31563	27148	29559	26188.5
1041	unknown1394	8.77e-05	0.000728787	18	0	2288.73	0.218257	0.563538	26.6465	17.9999	4648.75	0.000227061	0.0013926	22.3233	18.7014	4732.81	1817.3	0.383978	7550	8533	6357	6821	2932	2765	2983	3254	4218	4113	5141	4547	4321	5087	4876	4311	4863.06
1048	unknown140	0.00421867	0.0142044	18	9	2572.81	0.351952	0.760996	20	6	9268.5	0.0111543	0.032546	19	7.6	6753.5	2640.18	0.390935	4138	4342	3703	3854	10987	7111	12541	6435	4974	10355	6203	4600	3081	5410	5655	6363	6234.5
1054	unknown1405	0.00164724	0.00683195	18	0	2218.02	0.384625	0.803778	20	12	9802.75	0.00529927	0.0176507	19	15.2	9065.78	2820.68	0.311135	11773	12702	10974	11028	7418	6131	6114	7577	8623	9682	10389	10517	9820	9825	9039	8015	9351.69
1055	unknown1406	0.000171384	0.00117234	18	0	1328.65	0.243645	0.605612	20	17.9999	4349.5	0.000462819	0.00246192	19	18.05	4071.24	985.55	0.242076	5393	6358	5107	5546	3033	2626	2337	3431	3816	4014	4472	5035	4643	4486	4319	3950	4285.38
1060	unknown1410	0.0299489	0.0655606	18	0	1595.94	0.628579	1	20	12	7188	0.0936097	0.186788	19	15.2	6646.39	1989.06	0.299269	8800	9397	7128	8270	5442	4751	3948	6020	5904	7902	8410	6536	7857	7494	6244	5465	6848
1061	unknown1411	0.000320124	0.00187824	24	9	15584.3	0.0436067	0.259319	20	5.99998	74940.8	0.000170018	0.00111805	22	7.42499	33591.2	31600.2	0.940729	20932	12316	11514	10109	67293	54528	116825	61117	26468	27036	23786	17610	10178	12361	12081	10872	30939.1
1063	unknown1413	0.00421867	0.0142044	18	0	1576.85	0.373626	0.791487	20	12	5620	0.011747	0.0338646	19	15.2	5069.84	1838.5	0.362635	6446	6863	6202	6742	3810	3474	2798	4094	4370	6133	6595	5382	5996	6237	4759	4198	5256.19
1064	unknown1414	0.0144977	0.0373217	18	0	1273.15	0.512187	0.959266	28	12	3909.75	0.0438317	0.100578	23	4.92857	4014.54	1653.3	0.411827	5031	6984	5555	4990	3091	2841	2714	3747	3303	4131	4686	3519	3471	4158	3558	2999	4048.62
1066	unknown1416	0.000987235	0.00453311	18	0	1194.3	0.345911	0.750775	20	12	4752.25	0.00306737	0.0113422	19	15.2	4607.15	1417.32	0.307634	5869	6549	5539	6181	3845	3181	2891	4091	4059	4944	5291	4715	4982	4793	4698	4385	4750.81
1070	unknown142	0.0144977	0.0373217	18	0	1182.64	0.557613	1	20	17.9999	3304.25	0.0470323	0.106623	19	18.05	3084.01	945.15	0.306467	3155	5501	5360	4432	2561	1327	2765	1483	2410	3704	3752	2963	3198	3402	2552	4065	3289.38
1071	unknown1420	0.0144977	0.0373217	18	15	709.758	0.984041	1	20	12	7101.75	0.0748963	0.156139	19	13.6167	6597.81	973.852	0.147602	7163	7252	7316	6898	6592	5705	4916	6228	6277	7439	7600	7091	6931	6843	5738	5425	6588.38
1074	unknown1423	8.77e-05	0.000728787	18	9	8678.85	0.0335102	0.244687	20	6	22520.8	4.04e-05	0.000359658	19	7.6	12093.2	9294.53	0.768577	3981	4917	5529	3882	20181	18025	32482	19395	9046	10200	9926	7533	4196	5324	5115	4525	10266.1
1080	unknown1429	0.0419656	0.0850707	18	0	1334.66	0.316109	0.709933	20	12	6842.75	0.0706076	0.149127	19	15.2	6076.92	2017.13	0.331934	7615	8047	7111	7296	4864	4113	3391	5022	5768	7334	7663	6606	7277	7747	5506	5142	6281.38
1081	unknown143	0.00164724	0.00683195	18	9	912.521	0.105299	0.371371	20	6	5443.25	0.00167549	0.00695578	19	7.6	4285.48	1138.12	0.265576	2855	3787	3383	3049	4901	5452	6775	4645	4550	3952	4368	3549	4188	3736	3086	2712	4061.75
1086	unknown1434	0.00980952	0.0273153	18	0	501.339	0.652696	1	20	12	2521.75	0.0387427	0.0912211	19	15.2	2355.15	580.03	0.246282	2862	3009	2862	2845	2252	1641	1547	2153	2059	2658	2568	2802	2493	2387	2263	2222	2413.94
1093	unknown1440	0.00164724	0.00683195	18	0	1010.1	0.391898	0.814259	20	17.9999	3707.5	0.00538738	0.0179303	19	18.05	3524.5	717.952	0.203703	4377	4988	4845	4426	2848	2534	2045	3169	2973	4485	3631	3737	3039	4206	3889	3696	3680.5
1095	unknown1442	0.0210199	0.0497627	18	15	676.524	0.896959	1	20	12	4972.5	0.0937236	0.186929	19	13.6167	4716.03	764.302	0.162065	5316	5754	5082	5127	4389	4092	2998	4446	3992	5335	5172	5391	4689	4854	4454	4247	4708.62
1111	unknown1457	0.00164724	0.00683195	18	0	8596.65	0.202563	0.53547	20	17.9999	52424.5	0.00300483	0.011149	19	18.05	50107.1	6802.87	0.135767	53522	61852	65323	60322	41379	38751	43739	42082	48137	53151	52037	55370	50236	52497	51661	55304	51585.2
1113	unknown1459	0.0144977	0.0373217	18	0	2263.27	0.27977	0.655168	20	12	15703.2	0.0263948	0.0668108	19	15.2	15103.5	3041.24	0.20136	15714	18482	19596	17426	12495	11913	13254	12859	14347	15855	16071	16540	15204	15460	15629	15743	15411.8
1118	unknown1463	0.00980952	0.0273153	18	12	307.415	0.371502	0.788532	24.1644	12	4442.25	0.0241053	0.0621656	21.0822	12.2621	3976.41	657.357	0.165314	3398	3938	4013	3729	4323	4130	3467	4444	3891	4710	4908	4260	3829	3621	2980	3181	3926.38
1120	unknown1465	0.0210199	0.0497627	18	15	1265.9	0.948569	1	20	12	5638.5	0.098001	0.193942	19	13.6167	5097.59	1364.07	0.267592	6283	7026	5980	5316	4165	3543	4018	4141	5091	6482	5585	5396	4532	5454	4415	3923	5084.38
1126	unknown1470	0.000572095	0.00298095	24	9	707.107	0.0633958	0.295116	20	5.99999	5732.25	0.000407097	0.00222567	22	7.42499	4109.98	1253.07	0.304884	3313	3346	3667	3551	6749	5770	3917	6493	2958	3827	3732	4542	3120	2680	3328	3084	4004.81
1137	unknown1480	0.00421867	0.0142044	24	21	2017.02	0.118079	0.39074	20.7529	17.9999	8460.74	0.0042863	0.0149434	22.3765	19.4937	6580.63	2219.95	0.337346	8462	7771	6675	9711	4603	4478	1689	5650	5535	6884	5826	6801	11064	8972	7369	6438	6745.5
1140	unknown1483	0.0065055	0.0199214	18	0	567.453	0.109778	0.37615	20	17.9999	4098.5	0.0058878	0.0192846	19	18.05	3508.99	635.752	0.181178	3997	3910	4515	4040	3387	3066	1937	2789	3230	4005	3731	3353	4633	4211	3824	3726	3647.12
1145	unknown1488	4.22e-05	0.000430754	18	9	1956.03	0.0708346	0.306459	20	6	9424.5	4.1e-05	0.000364483	19	7.6	7065.2	2282.56	0.323071	5332	4512	5935	3955	10759	10878	7278	8783	7027	6632	6743	6080	6286	5958	4914	4792	6616.5
1153	unknown1495	0.0065055	0.0199214	18	15	2204.05	0.489422	0.935215	20	12	15651.5	0.0214904	0.0565674	19	13.6167	14733.6	2267.06	0.15387	14463	17064	17288	16035	13217	12573	12569	11975	14762	16487	15977	15380	14571	14959	13819	14247	14711.6
1158	unknown15	0.0065055	0.0199214	18	0	3902.52	0.20915	0.547534	20	17.9999	22826.7	0.0103405	0.0306674	19	18.05	20525.4	3528.35	0.171901	27162	27397	23067	21331	18059	15334	16633	14115	18229	25760	23260	19019	24586	24734	20962	21025	21292.1
1160	unknown1500	0.00980952	0.0273153	18	0	1796.4	0.213327	0.554445	20	17.9999	11215	0.0150028	0.041857	19	18.05	10244.7	1684.47	0.164424	11476	10971	13401	13655	8910	8789	5936	8690	10112	12231	10886	9854	11496	9779	11662	11923	10610.7
1163	unknown1503	0.000572095	0.00298095	18	9	4665.84	0.0248091	0.240485	20	5.99998	13074	0.000172628	0.00112709	19	7.59999	6677.06	5212.94	0.780724	1857	2230	2912	3153	11324	10422	14015	16535	2968	4547	4354	4720	3139	2773	2478	3010	5652.31
1168	unknown1508	0.0210199	0.0497627	18	0	1831.05	0.563215	1	20	12	15740	0.0643597	0.137755	19	15.2	14475	2985.23	0.206233	17783	17585	16697	14766	13767	12531	9612	11961	13818	17483	16250	15409	15616	16272	14098	12793	14777.6
1170	unknown151	2.89e-06	6.22e-05	24	0	2949.17	0.0180148	0.240485	25.2722	6.63e-05	12811.5	9.24e-07	2.43e-05	24.6361	3.23e-05	9125.35	3777.45	0.413951	12458	13253	14239	11296	8191	7438	7273	8084	5703	6785	6321	6034	10199	11005	8589	7966	9052.12
1182	unknown1520	0.0419656	0.0850707	24	3	408.708	0.686001	1	24.5682	6.63e-05	4737.5	0.130923	0.246585	24.2841	1.51779	4179.31	679.71	0.162637	4259	4721	4340	5630	4785	4413	2442	4663	3469	3798	3737	3672	4359	3944	4242	4344	4176.12
1183	unknown1521	0.0210199	0.0497627	18	15	1839.72	0.109196	0.375609	20	12	9277.5	0.0162435	0.0447134	19	13.6167	8625.85	1797.63	0.208401	8954	10175	10224	9519	6599	6502	7242	6201	8673	9740	9472	9225	8976	9167	8248	8818	8608.44
1184	unknown1522	0.00421867	0.0142044	18	15	3690.39	0.191086	0.517126	20	12	18644	0.00654839	0.0210814	19	13.6167	17076.9	3839.99	0.224864	17870	19901	20520	19013	13198	12643	14555	12271	17569	19418	19180	18409	17347	18365	15486	16891	17039.8
1190	unknown1528	0.0299489	0.0655606	18	15	1139.5	0.364722	0.779875	20	12	3850.75	0.0602611	0.130531	19	13.6167	3347.32	1330.01	0.397335	3714	4726	4615	3731	1612	1214	3174	1906	4257	3483	4058	3605	2797	3685	3066	3708	3334.44
1202	unknown1539	0.0299489	0.0655606	18	0	663.089	0.62691	1	28	12	2786.25	0.093411	0.186564	23	4.92857	2851.87	939.787	0.329533	3428	4552	3214	3700	2556	2278	1953	2476	2485	3003	3213	2444	2718	3281	2324	2315	2871.25
1207	unknown1543	0.000987235	0.00453311	18	0	2865.37	0.533614	0.984469	26.8085	12	7669	0.00450347	0.0155379	22.4043	5.01429	7818.13	3776.71	0.483071	9505	13842	10469	10299	5145	5091	5715	5961	6675	9698	8304	5999	7226	9560	7019	6550	7941.12
1214	unknown155	8.77e-05	0.000728787	24	0	20968.2	0.0257072	0.240485	24.5682	6.63e-05	69473.3	3.16e-05	0.000302658	24.2841	3.28e-05	49409.4	24272.3	0.491249	69368	79433	70171	58922	34066	32872	40456	40429	30794	36556	37529	27103	67744	66148	50230	45229	49190.6
1222	unknown1557	0.000572095	0.00298095	24	6	2611.17	0.0359581	0.247108	26.0177	6.63e-05	13601.7	0.00024257	0.00146006	25.0088	3.12614	11634.2	2310.39	0.198586	11485	16212	13171	13539	13783	12504	13806	13845	10524	10875	10461	8596	9626	10141	9195	8546	11644.3
1227	unknown1561	0.00980952	0.0273153	24	9	1850.85	0.124027	0.399877	20	6.00002	7476	0.00938233	0.0282514	22	7.42501	3924.88	2772.62	0.70642	1771	1802	2704	2497	12222	5874	7042	4766	2123	1774	4470	4317	548	1610	2157	3398	3692.19
1229	unknown1563	0.00164724	0.00683195	24	9	2812.52	0.115247	0.384157	24.4321	6	17424.2	0.00181664	0.00741381	24.2161	7.51398	14869.6	3082.53	0.207305	11726	14068	15428	13626	16654	13725	21045	18273	17982	17926	14681	15269	11713	13284	11272	11697	14898.1
1230	unknown1564	0.0065055	0.0199214	24	9	2397.27	0.179945	0.500747	24.7059	6.00002	15909.2	0.00907264	0.0275488	24.3529	7.52333	13983.6	2508.97	0.179422	11353	13621	14823	12745	14985	12607	19464	16581	17023	16511	14592	13889	11338	12498	10802	11512	14021.5
1231	unknown1565	0.000171384	0.00117234	24	3	986.414	0.0384302	0.251167	28	6.63e-05	6641.49	8.52e-05	0.000656161	26	1.62503	4644.02	925.181	0.19922	5762	8064	6429	6311	4352	3954	4739	4282	3362	3872	3991	3149	3827	4241	3522	4167	4626.5
1242	unknown1575	0.00421867	0.0142044	18	0	1828.75	0.10698	0.372967	20	17.9999	5804.5	0.00392795	0.0139296	19	18.05	4636.57	1561.05	0.336682	6208	6167	5984	7067	3194	2482	1458	3415	4217	5126	5828	5248	7533	6704	4671	4310	4975.75
1247	unknown158	0.000987235	0.00453311	18	0	8025.13	0.0558176	0.282403	24.2975	17.9999	40112.2	0.000595481	0.00301924	21.1488	18.408	34628.8	9108.36	0.263029	47587	46637	46369	37671	29623	28619	28840	26744	27834	31688	33728	26377	46354	45633	36081	32381	35760.4
1248	unknown1580	0.000572095	0.00298095	18	9	1705.54	0.0458194	0.263827	20	6	6968	0.000302741	0.00175485	19	7.6	4193.26	2436.12	0.58096	1673	2855	2556	2062	6441	5650	10047	5734	3418	3566	3794	2716	2083	2197	2222	2416	3714.38
1249	unknown1581	8.88e-07	2.53e-05	18	0	4161.68	0.0627463	0.294119	24.0327	18	8267.99	9.86e-07	2.48e-05	21.0163	18.3786	6647.2	3732.17	0.561466	10811	12161	9360	11984	3394	3553	1580	4232	5160	5720	5790	7314	8572	7052	8623	8825	7133.19
1258	unknown159	0.0210199	0.0497627	24	6	1257.59	0.142643	0.436098	21.1511	6.00001	7846.5	0.0204178	0.0543052	22.5755	6.02399	5874.91	1822.68	0.310248	4516	8139	5408	4515	9635	7911	7737	6103	6154	5589	5248	4340	5265	4483	3809	3837	5793.06
1263	unknown1594	4.22e-05	0.000430754	18	9	6229.43	0.0531441	0.278977	23.2718	5.99999	20867.5	3.14e-05	0.000302658	20.6359	7.81917	15292.1	6522.09	0.426501	7907	9590	8900	8506	20346	16505	27798	18821	15108	15437	19893	17339	8883	11845	12398	10280	14347.2
1264	unknown1595	4.22e-05	0.000430754	18	9	1372.85	0.0179254	0.240485	20	6.00001	6092.5	1.14e-05	0.00013921	19	7.60001	3670.57	2065.06	0.562599	1639	2181	2079	2018	6240	5884	6787	5459	2636	2824	3281	2632	2064	2036	2319	2155	3264.62
1273	unknown1602	0.000987235	0.00453311	18	9	4670.09	0.0496379	0.273235	20	5.99999	17193.8	0.000535303	0.00277921	19	7.59999	9086.97	6472.18	0.712248	2538	5046	3793	3637	22482	19168	10157	16968	4116	5950	6183	6271	6282	5450	3133	3861	7814.69
1276	unknown1605	8.88e-07	2.53e-05	18	9	4461.49	0.0477231	0.269064	20	5.99999	13497.5	7.62e-07	2.29e-05	19	7.6	8522.84	5430.88	0.637215	2595	3365	4181	3285	12453	10634	19616	11287	7586	9112	8886	8434	3426	5094	4606	4724	7455.25
1283	unknown1611	0.000320124	0.00187824	18	0	930.729	0.120368	0.395358	20	17.9999	4954.5	0.000430179	0.00232612	19	18.05	4278.15	914.591	0.213782	4516	5640	5295	5830	3702	3515	2369	3586	4294	4242	4778	4045	5693	5368	4440	4317	4476.88
1292	unknown162	0.0065055	0.0199214	18	3	13626.8	0.334764	0.735428	24.1644	6.73e-05	89434.9	0.0155265	0.0430685	21.0822	1.75688	79583.1	29478	0.370405	100814	99287	89220	68419	79003	72935	78590	63452	63892	69333	60399	42144	133435	123453	94853	69433	81791.4
1293	unknown1620	0.0210199	0.0497627	18	0	942.927	0.174993	0.492985	20	12	7941.25	0.0242964	0.0625467	19	15.2	7078.57	2026.11	0.286231	6670	9186	8628	8717	5384	4924	4566	6200	7922	8062	8074	7707	8732	8144	6365	7262	7283.94
1307	unknown1633	0.0210199	0.0497627	18	0	1191.47	0.765903	1	20	12	3996.75	0.0825725	0.168969	19	15.2	3745.31	1344.2	0.358902	4488	5720	5720	4499	2331	2026	4197	2297	3620	3832	4500	4035	2733	4071	3813	4223	3881.56
1309	unknown1635	0.0144977	0.0373217	18	15	1247.69	0.276771	0.651314	20	12	6260.25	0.0261551	0.0665012	19	13.6167	5822.31	1212.72	0.208289	5673	6683	7561	6507	4693	4645	4609	4175	5833	6413	6519	6276	5301	5585	6084	6412	5810.56
1310	unknown1636	0.0419656	0.0850707	24	15	707.991	0.250247	0.613572	23.52	12	3304.75	0.05835	0.127026	23.76	13.4862	2336.47	1221.38	0.522743	1289	1266	1211	1900	2777	2339	911	3175	2764	3359	3673	3423	3595	2786	1478	1356	2331.38
1315	unknown1640	0.00267199	0.0100694	18	15	1578.62	0.292455	0.675028	20	12	5350.75	0.00637215	0.0206368	19	13.6167	4604.31	1684.56	0.365866	4666	6216	5895	5515	2885	2612	3314	3252	5195	5729	5440	5039	4347	4748	4087	4468	4588
1316	unknown1641	0.000987235	0.00453311	18	15	1403.61	0.568349	1	20	12	5286.5	0.00476123	0.0162076	19	13.6167	4389.39	1763.65	0.401797	4705	5544	5994	5101	2701	2359	3575	3113	5403	5790	5070	4883	3485	4466	3784	3984	4372.31
1318	unknown1643	0.000987235	0.00453311	18	15	2312.95	0.5791	1	20	12	7639.25	0.00484058	0.0164004	19	13.6167	5892.02	3010.07	0.510872	5958	7937	7706	7160	3154	2630	3525	5026	8617	7724	7904	6312	5020	6345	4286	4502	5862.88
1319	unknown1644	0.000572095	0.00298095	18	15	3381.74	0.545081	1	20	12	11604	0.00282932	0.0106069	19	13.6167	9406.25	3968.8	0.421933	9461	12190	12380	10838	5568	4685	6796	7804	12430	11735	12756	9495	8593	9814	7605	7735	9367.81
1320	unknown1645	0.000171384	0.00117234	18	15	4442.04	0.516998	0.964159	20	12	20254.5	0.00091541	0.00428511	19	13.6167	16351.4	6734.86	0.411883	16197	20383	20120	19926	10063	8702	10978	14476	22512	20391	20389	17726	14995	18012	12712	12997	16286.2
1322	unknown1647	0.00267199	0.0100694	18	15	1724.99	0.432239	0.865678	20	12	13746.5	0.00896662	0.0273226	19	13.6167	12191.8	2259.66	0.185343	11045	13469	12528	13394	10662	9704	8411	12890	13796	14073	13779	13338	13013	12004	11053	11559	12169.9
1326	unknown1650	0.0419656	0.0850707	18	9	3105.08	0.744351	1	25.4179	6.00001	14618	0.13951	0.25926	21.7089	7.98948	12478.8	2208.53	0.176982	8500	9426	8149	11866	16448	16292	9162	16570	9753	12364	14973	14416	13185	10737	11526	12686	12253.3
1330	unknown1654	0.0299489	0.0655606	18	15	761.554	0.516405	0.963807	20	12	5176.5	0.0799446	0.164681	19	13.6167	3916.9	1357.48	0.346572	4084	4369	3627	3594	3011	2852	3264	4374	4467	5835	6059	4345	3577	4041	2526	2435	3903.75
1331	unknown1655	0.000987235	0.00453311	24	9	493.914	0.0947981	0.351309	20	6	4747.25	0.000961767	0.00445396	22	7.425	4074.44	638.217	0.156639	2694	3948	3707	3944	4642	4590	4871	4886	4211	4314	3679	4168	3689	3609	3624	3758	4020.88
1345	unknown1668	0.00164724	0.00683195	24	9	821.658	0.0758565	0.314315	24.0327	5.99999	6033.25	0.00124799	0.00546942	24.0163	7.50102	5153.39	961.737	0.186622	3860	4929	5133	5198	5796	5280	7041	6016	5993	5944	5178	5017	4343	4334	4113	4290	5154.06
1348	unknown1670	0.000171384	0.00117234	18	9	899.617	0.1086	0.375582	20	6.00002	3848.25	0.000221332	0.00136422	19	7.60001	2923.75	974.804	0.333409	1702	1863	1889	1995	4252	4109	2841	4191	3154	2506	3025	2669	3111	2248	2174	1985	2732.12
1351	unknown1673	0.0419656	0.0850707	18	9	3097.83	0.482704	0.927288	26.4865	6	18362.8	0.099244	0.196043	22.2432	8.0802	16851.7	2126.61	0.126196	11299	12422	13587	17021	20847	18291	14311	20002	16129	18097	19612	18105	18825	14593	16356	17436	16683.3
1354	unknown1676	0.00164724	0.00683195	18	9	3076.98	0.223234	0.571896	20	6.00001	10287.5	0.00327572	0.0120304	19	7.6	7072.16	3142.09	0.444289	3156	3423	3594	4728	11107	11723	5131	13189	7368	6523	5901	5900	7754	4373	4810	4592	6454.5
1357	unknown1679	0.0419656	0.0850707	24	12	1821.86	0.380577	0.80058	26.0177	12	14727.8	0.0820432	0.168125	25.0088	12.0196	12973.4	2155.16	0.166121	8275	9348	9999	14136	14968	15344	9864	15207	13443	15569	13849	16050	14316	12391	12608	13363	13045.6
1359	unknown1680	8.77e-05	0.000728787	18	9	4527.25	0.144476	0.43742	20	6	14633.5	0.00015553	0.00104572	19	7.6	8496.94	5574.78	0.656093	2989	2832	3010	3830	15177	15261	6287	21809	8938	6335	5996	5778	6777	4406	4874	4118	7401.06
1362	unknown1683	0.00421867	0.0142044	24	21	2838.33	0.144102	0.437186	24.0327	17.9999	16509.5	0.00510985	0.0171251	24.0163	19.501	12756.5	3460.77	0.271294	10699	11799	14205	16938	11359	10373	3591	10621	12602	9478	11998	14365	17961	14695	15234	18148	12754.1
1363	unknown1684	0.00980952	0.0273153	24	21	2464.27	0.157355	0.461732	24.0327	17.9999	13244	0.0115361	0.0333232	24.0163	19.501	10329.6	2762.79	0.267463	8841	9703	11883	13406	9191	8552	3202	8811	8421	7945	9831	12481	13818	11951	12578	14629	10327.7
1367	unknown1688	0.0210199	0.0497627	18	15	2226.5	0.132934	0.416501	20	12	10565.2	0.019225	0.0515444	19	13.6167	9178.3	2438.52	0.265683	8030	8810	10957	11125	6753	6976	5177	7707	9989	9854	9980	12438	9699	8873	9489	10618	9154.69
1368	unknown1689	0.00980952	0.0273153	18	12	7692.61	0.627168	1	20	12	157347	0.0374728	0.0889081	19	12.0333	144508	16650.4	0.115221	134198	149330	152818	129725	141260	136733	154527	145457	139489	158358	177216	154324	135440	133896	119261	118632	142542
1388	unknown1706	0.0065055	0.0199214	24	21	1228.42	0.233574	0.589726	20	17.9999	8842.24	0.0113802	0.0330049	22	19.525	7731.3	1221.87	0.158042	8847	9519	8932	7043	7014	6003	6078	5204	7021	8471	8729	7276	10432	10219	7521	7197	7844.12
1393	unknown1710	0.0419656	0.0850707	18	6	3177.74	0.159499	0.464446	20	6.00001	16857.5	0.0402052	0.0935959	19	6.01667	13246.1	3541.9	0.267391	12856	12767	12330	9500	19313	17880	17379	12858	11010	11396	11673	9238	14553	12513	11138	8667	12816.9
1395	unknown1712	0.0299489	0.0655606	18	0	1612.2	0.365225	0.780469	20	17.9999	12247.7	0.0603292	0.130613	19	18.05	11317.8	1518.3	0.134152	14989	13835	13585	10126	9759	8855	9678	7733	11006	12821	13384	11601	14288	13483	10891	10329	11647.7
1404	unknown1720	0.00980952	0.0273153	18	0	4031.75	0.144282	0.437186	20	17.9999	25682.7	0.0107005	0.0314763	19	18.05	22105.9	4237.19	0.191677	29435	27834	28039	20197	17961	15975	18278	14201	20059	24886	26292	22536	29388	27982	24114	21247	23026.5
1415	unknown1730	0.0419656	0.0850707	24	6	1982.73	0.403596	0.8302	22.9091	6	8465.5	0.086011	0.174849	23.4545	6.00325	5664.65	2688.02	0.474525	4281	3490	9243	5253	10495	11883	6600	4884	4565	5871	8839	2043	4449	2764	3260	1957	5617.31
1423	unknown1738	0.0419656	0.0850707	18	6	4798.07	0.471869	0.915	20	5.99999	14828	0.097466	0.193148	19	6.01666	6540.83	8936.29	1.36623	1143	419	419	1079	26872	9997	1179	21264	7294	966	1377	90	8265	3507	1590	1866	5457.94
1433	unknown1747	0.00267199	0.0100694	24	21	3247.39	0.0555009	0.281918	20	18	14353	0.00145574	0.00617975	22	19.525	11585	3193.48	0.275657	14865	16098	12850	12201	8855	6809	8338	7292	9713	12860	11914	10871	16826	16017	12400	12169	11879.9
1434	unknown1748	0.00267199	0.0100694	24	21	1611.5	0.110865	0.378074	22.6735	17.9999	13866.2	0.00270291	0.0101948	23.3368	19.4731	12039.1	1832.98	0.152253	13090	14644	11914	11291	11060	9021	11182	8533	11002	12404	12358	11519	15040	15031	13332	12062	12092.7
1435	unknown1749	0.000572095	0.00298095	18	0	875.398	0.193206	0.519533	24.9858	17.9999	3709.75	0.0011175	0.00502993	21.4929	18.4883	3494.26	669.644	0.191641	4415	4403	4465	4025	2796	3037	2696	3156	3553	3216	3988	2484	4236	3620	3579	3404	3567.06
1466	unknown1777	0.00267199	0.0100694	18	0	1050.05	0.160362	0.465123	20	17.9999	4221	0.0037515	0.0134137	19	18.05	3540.33	948.897	0.268025	3837	5119	5171	4380	3616	2226	2120	1701	2655	4123	4019	4093	3831	4152	4796	4105	3746.5
1467	unknown1778	0.0419656	0.0850707	24	21	1285.87	0.159751	0.464867	20	17.9999	7388.5	0.0402581	0.0936687	22	19.525	6289.01	1457.14	0.231696	6601	7988	8131	7363	6618	3904	3501	3039	4458	7078	7429	7113	6547	7444	8170	7393	6423.56
1470	unknown1780	0.00267199	0.0100694	18	0	2644.23	0.0761787	0.314446	20	17.9999	9239	0.00193363	0.00776683	19	18.05	7836.98	2278.58	0.290747	9312	10952	11223	10781	5945	4187	4232	3408	7127	9169	10574	9447	10410	8623	8446	9477	8332.06
1479	unknown1789	0.00267199	0.0100694	18	0	14825.9	0.068422	0.304488	20	17.9999	51703.7	0.00175638	0.00723609	19	18.05	41592.2	13744.3	0.330454	51242	58976	61658	55312	35570	21296	20134	16140	33670	44486	54765	53192	56489	51840	47831	50655	44578.5
1482	unknown1791	0.000987235	0.00453311	18	0	2200.52	0.105461	0.371371	20	17.9999	8657.74	0.00105885	0.00480589	19	18.05	7103.2	2110.73	0.297152	8834	9567	11141	8363	6620	4648	3783	3215	5276	8182	8713	8016	9498	8389	7960	8784	7561.81
1483	unknown1792	0.00421867	0.0142044	18	0	2909.74	0.193305	0.519533	20	17.9999	8585	0.00661504	0.0212486	19	18.05	7262.42	2221.02	0.305823	8445	9805	11040	10837	5709	4574	4059	3314	4856	7365	10621	8955	9373	8443	6974	9550	7745
1490	unknown1799	0.0299489	0.0655606	24	18	1422.7	0.21805	0.563384	20	12	3822.5	0.0393865	0.0922845	22	14.85	2798.97	2201.06	0.786384	1378	1766	3993	3617	1564	648	1100	1037	2324	3399	4243	5324	3076	4997	1803	4842	2819.44
1492	unknown180	0.0299489	0.0655606	24	6	230.517	0.226731	0.578519	28	6.44e-05	3635.75	0.0406896	0.0943684	26	3.25003	3463.01	133.865	0.0386557	3409	3838	3726	3570	3310	3916	3879	3389	3476	3471	3301	3468	3118	3013	3253	3306	3465.19
1494	unknown1801	0.0299489	0.0655606	24	15	1764.58	0.0761405	0.314446	20	12	5778.75	0.0161526	0.0444914	22	13.475	3383.66	2987.64	0.882961	1227	1435	3411	2966	2762	1063	1336	1298	3593	5107	6434	7981	2977	4317	2299	4647	3303.31
1495	unknown1802	0.0065055	0.0199214	24	21	4496.32	0.121446	0.397093	20.3695	17.9999	11876.5	0.00643383	0.0207899	22.1848	19.5078	7402.29	4603.04	0.62184	6072	6089	15409	13190	2791	793	1198	1068	4522	6342	8576	11028	9677	15691	7130	15008	7786.5
1497	unknown1804	0.0299489	0.0655606	18	15	2492.9	0.341159	0.744765	20	12	7120.75	0.0570503	0.124825	19	13.6167	4347.08	3267.89	0.751744	1533	2339	7314	4896	3425	1357	1820	1435	3857	8442	6336	9848	3444	4399	2426	6176	4315.44
1498	unknown1805	0.0419656	0.0850707	24	15	5201.3	0.0933985	0.348034	20	12	21149.5	0.0256407	0.0654238	22	13.475	10472.3	14081.1	1.34461	2187	3292	12001	7759	8851	3054	4351	3867	11384	25879	18417	28918	6270	8784	4096	12387	10093.6
1499	unknown1806	0.0144977	0.0373217	18	15	16785.1	0.0864416	0.334189	20	12	51801.2	0.00962719	0.0289083	19	13.6167	24828.2	27273.7	1.0985	6636	8662	31441	19983	16022	4807	7523	5895	27472	61912	45073	72748	17781	24308	11691	31071	24564.1
1500	unknown1807	0.0144977	0.0373217	24	12	5964.09	0.0662461	0.300098	20	12	22969.8	0.00763354	0.0238307	22	12.1	11241.5	12303.5	1.09447	1715	2802	10040	5486	13864	5423	7883	5770	13571	28039	19349	30920	5080	5832	3482	8995	10515.7
1501	unknown1808	0.0065055	0.0199214	18	15	5725.09	0.210505	0.550082	20	12	13355.5	0.0103986	0.0307979	19	13.6167	6709.55	7608.33	1.13395	2463	3450	10676	6939	2890	806	1135	1808	5899	19179	10109	18235	4588	6837	3005	8155	6635.88
1515	unknown1820	0.00267199	0.0100694	24	6	322.087	0.0986368	0.359207	21.5648	6	3230.25	0.00243559	0.0093494	22.7824	6.01719	2650.4	559.206	0.210989	2452	2652	2986	2160	3083	4010	2935	2893	2641	2499	2531	2494	2369	2215	1989	2152	2628.81
1525	unknown183	0.0419656	0.0850707	24	0	2319.31	0.277111	0.651407	24.0327	6.63e-05	14145	0.0634281	0.13603	24.0163	3.31e-05	11926.8	2889.36	0.242258	13866	15642	10495	16577	11914	11090	8598	11888	8473	7375	12245	10855	11067	12559	13408	14752	11925.2
1535	unknown1839	0.0419656	0.0850707	24	6	1696	0.253011	0.617901	21.4599	6	7045.5	0.0588779	0.127918	22.7299	6.01879	4764.73	1835.09	0.385141	5770	3080	6208	4902	8256	5001	10494	4431	2275	5787	4024	2902	2943	3517	2443	3022	4690.94
1555	unknown1857	0.0419656	0.0850707	24	9	925.603	0.266352	0.63613	23.3952	6	4925.75	0.061408	0.132419	23.6976	7.48208	3599.94	1036.72	0.287982	3059	2719	4978	3427	5647	6116	4755	3185	3252	3889	5032	1953	3065	2306	2346	1656	3586.56
1565	unknown1866	0.00164724	0.00683195	24	6	1696.53	0.129139	0.40965	23.3952	6	6137.75	0.00201141	0.00804192	23.6976	6.00098	3907.1	2039.67	0.522043	2333	2815	4853	6297	8854	5002	6278	4417	4353	4207	3804	1820	2002	1816	1725	1617	3887.06
1568	unknown1869	8.77e-05	0.000728787	24	6	6367.14	0.112774	0.379919	20	6	31818.8	0.000123852	0.000887881	22	6.05	13107	17370.9	1.32532	4773	5280	8159	11927	35452	19947	57752	14124	5002	9183	5177	4019	2719	2865	1793	4299	12029.4
1571	unknown1871	0.00980952	0.0273153	18	12	3004.85	0.455899	0.894894	20	12	23231.8	0.028666	0.0711311	19	12.0333	17969.5	6373.46	0.354681	14422	14726	13912	17903	15397	16870	16049	24143	32235	18686	24065	17941	19051	12421	8462	9183	17216.6
1572	unknown1872	0.000320124	0.00187824	24	6	2823.48	0.095146	0.351773	20	6	13314	0.000347201	0.00196008	22	6.05	5944.8	6807.96	1.1452	2552	3437	4390	5479	14589	9073	22987	6607	2527	4998	2988	1946	1379	1097	924	3387	5522.5
1573	unknown1873	0.0144977	0.0373217	18	12	1559.88	0.455314	0.894894	23.7736	12	10717.8	0.0397416	0.0927799	20.8868	12.2337	8573.89	3004.64	0.350441	7441	6854	6753	7973	7998	9646	7464	12075	14856	9837	11232	6946	9009	6283	4798	4126	8330.69
1578	unknown1878	0.0419656	0.0850707	24	9	8227.54	0.408185	0.83567	22.7907	6.00001	28330.2	0.0867954	0.176278	23.3953	7.46623	16918.3	9792.91	0.578837	14839	8775	11465	22262	49120	31420	13103	19678	26510	9712	3993	29055	7335	8835	4628	5926	16666
1585	unknown1884	0.0419656	0.0850707	24	9	3430.35	0.49339	0.939067	24.8451	5.99999	9731.5	0.100988	0.198582	24.4225	7.5282	6532.94	3588.97	0.549365	5357	4232	4865	8446	16318	10394	4272	7942	12057	4614	2774	13314	2676	4003	1991	2311	6597.88
1588	unknown1887	0.00980952	0.0273153	18	15	473.408	0.987314	1	20	12	3324	0.0545964	0.120835	19	13.6167	2833.66	719.689	0.253979	2839	2753	3636	3222	2245	2520	2357	2585	4168	2760	2757	3611	2696	2667	2230	2181	2826.69
1590	unknown1889	0.0419656	0.0850707	24	9	7115.26	0.513541	0.960532	25.2722	6	22572.5	0.10425	0.204161	24.6361	7.54376	15095.4	7648.2	0.506658	11085	10804	12437	24500	41211	24021	11139	13919	25540	14955	6557	24902	6449	6850	3856	6636	15303.8
1591	unknown189	0.0299489	0.0655606	18	12	8222.06	0.402493	0.828719	27.4766	12	333176	0.065314	0.139372	22.7383	12.5447	315981	34335.1	0.108662	288341	352772	334295	311845	307862	302865	385612	325135	348445	335127	334330	314804	287167	275333	260921	272825	314855
1603	unknown190	0.00980952	0.0273153	18	12	3288.4	0.893986	1	25.1282	12	12811.5	0.0503064	0.112922	21.5641	12.337	9169.58	5302.11	0.578228	5269	7429	12940	7293	4586	5504	22220	7453	14457	17788	7488	11513	4217	4055	4308	4780	8831.25
1604	unknown1900	0.0144977	0.0373217	24	9	2623.37	0.0162637	0.240485	20	6	13816.8	0.00220522	0.00862565	22	7.425	7436.1	4568.44	0.614361	4986	5307	4206	4820	14382	13545	14202	13138	7239	6469	4960	3220	5182	5110	3207	2870	7052.69
1647	unknown194	0.000171384	0.00117234	18	0	11047.1	0.281424	0.657552	20	17.9999	28449.2	0.000527629	0.00274926	19	18.05	25704.3	8973.22	0.349094	30544	49709	38953	39337	13122	15103	18774	17256	23148	27236	29160	26325	26637	23601	27758	35801	27654
1649	unknown1941	0.0419656	0.0850707	24	9	1077.98	0.359296	0.77132	20.0911	6	6503	0.0783232	0.161958	22.0456	7.42538	3711.21	1962.1	0.528696	1753	2410	2168	5785	4337	2528	7581	11566	3722	3284	2808	1646	2299	1946	1793	1177	3550.19
1660	unknown1951	0.0299489	0.0655606	18	9	768.625	0.224205	0.573764	20	6.00002	5190.5	0.0403115	0.0937426	19	7.60001	3888.76	1094.71	0.281507	2958	3141	2929	2467	6762	5717	3320	4963	3723	3070	3883	2902	3747	3361	2970	2864	3673.56
1661	unknown1952	0.0419656	0.0850707	24	6	1316.28	0.389638	0.81112	22.3291	6.00001	4776.5	0.0836118	0.170737	23.1646	6.00782	2565.23	2025.84	0.78973	1073	1435	2997	4674	7378	7973	2644	1111	2703	2207	2907	523	832	416	545	758	2511
1689	unknown1978	0.0210199	0.0497627	18	15	1998.64	0.941685	1	20	12	8616.25	0.0974339	0.193148	19	13.6167	7427.43	2283.91	0.307496	7225	9871	9632	8078	4754	5193	7270	5466	6511	10229	8484	9241	6382	7004	5885	7260	7405.31
1690	unknown1979	0.0419656	0.0850707	18	15	175127	0.1677	0.477913	20	12	638298	0.0419196	0.0967032	19	13.6167	562576	166378	0.295744	532351	763490	668475	564923	406604	389146	387792	337984	485522	636136	702296	729238	638978	625872	562597	544027	560964
1692	unknown1980	0.0419656	0.0850707	18	15	57211.8	0.172969	0.490155	20	12	207851	0.0430121	0.0989598	19	13.6167	184828	51979.1	0.281229	175883	240185	230441	185024	131523	133066	134263	112355	159700	210692	226318	234694	208319	203911	183999	178828	184325
1712	unknown1999	0.0299489	0.0655606	18	12	966.615	0.615552	1	20	12	10621.5	0.0920558	0.184623	19	12.0333	6530.56	4519.75	0.692092	3947	3776	4714	5084	5759	7309	4654	4190	12131	4103	20740	5512	4791	2926	3256	3054	5996.62
1714	unknown20	0.0210199	0.0497627	18	12	2261.5	0.312481	0.704845	25.1282	12	57642.5	0.0395773	0.0925323	21.5641	12.337	52052.4	9225.21	0.177229	44862	49604	57181	47065	56906	57728	53783	54588	48083	55521	57464	69502	42358	39638	36986	52150	51463.7
1716	unknown2000	0.0499351	0.10099	18	12	432.042	0.721807	1	20	12	5762.5	0.155817	0.283606	19	12.0333	3696.97	2263.61	0.612287	2417	2376	2715	2830	3171	4227	2708	2453	5992	2341	11672	3045	2715	1978	2268	1965	3429.56
1717	unknown2001	0.0419656	0.0850707	18	12	1587.81	0.687863	1	20	12	19706.8	0.131201	0.246999	19	12.0333	12583.9	7810.1	0.620643	7895	7524	9612	8924	11921	14915	9210	7605	21619	8174	39224	9810	9909	6626	7052	6560	11661.2
1718	unknown2002	0.00164724	0.00683195	18	15	3201.07	0.779817	1	20	12	11907	0.00983622	0.0294136	19	13.6167	10017.1	3745.7	0.373931	11696	12309	13229	11658	7613	6403	7150	7323	10736	12795	12851	11246	8866	9947	7412	8459	9980.81
1721	unknown2005	0.0177588	0.0456354	18	12	1239.56	0.653549	1	24.1644	12	5789.75	0.0633261	0.135878	21.0822	12.2621	4059.94	2497.27	0.615099	2082	2665	2996	4431	6995	6159	3167	2625	8368	3001	9556	2234	1940	1734	1731	2234	3869.88
1722	unknown2006	0.0299489	0.0655606	18	12	951.412	0.804269	1	20	12	7163.75	0.113837	0.220051	19	12.0333	4937.75	2771.24	0.561235	2410	3217	4299	5792	7385	6735	3323	2838	11433	3753	10914	2555	2318	1956	2093	2745	4610.38
1728	unknown2011	0.00980952	0.0273153	18	12	2362.09	0.570229	1	20	12	14792.5	0.0346031	0.0832861	19	12.0333	10821.6	4801.58	0.443703	8635	6837	8928	9607	14028	14189	7770	8614	25311	9128	13644	11087	8235	6042	5858	6157	10254.4
1744	unknown2026	0.0299489	0.0655606	18	12	1081.52	0.753268	1	20	12	7919.25	0.108096	0.210268	19	12.0333	4564.94	3595.03	0.78753	3230	2672	4146	3465	3196	4590	2852	826	17442	3662	6038	4535	2796	2235	2587	1972	4140.25
1753	unknown2034	0.0419656	0.0850707	18	12	2292.09	0.668807	1	20	12	13398.8	0.128355	0.242379	19	12.0333	9838.55	4240.35	0.430994	8300	6974	8246	8591	13511	12926	7123	5271	22244	8264	11658	11429	6903	5655	5608	6699	9337.62
1757	unknown2038	0.00421867	0.0142044	24	6	3562.4	0.0929837	0.347312	20.7529	5.99997	11037	0.00346905	0.0125698	22.3765	6.03174	6013.23	4312.34	0.717142	3163	11189	3146	5661	10132	7992	10016	16008	2280	3034	3899	6616	1737	1581	3018	3228	5793.75
1764	unknown2044	0.0144977	0.0373217	18	3	481.893	0.699694	1	25.7143	6.63e-05	15577.4	0.0567137	0.124276	21.8571	1.82146	12253.8	21812.9	1.78009	60923	191	362	834	4297	147	1071	831	213	151	182	150	34342	16571	81533	10741	13283.7
1765	unknown2045	0.000572095	0.00298095	24	0	627.734	0.0521232	0.276925	24.0327	6.63e-05	5559.24	0.000340548	0.00193007	24.0163	3.31e-05	4985.87	808.297	0.162118	5572	5917	5585	5163	4968	4755	4807	3894	4359	4466	4852	4037	5321	5154	5558	5359	4985.44
1768	unknown2048	8.77e-05	0.000728787	18	0	5375.07	0.037828	0.250069	20	17.9999	17010.2	4.52e-05	0.00039037	19	18.05	13376.2	5007.21	0.374336	18609	19144	20430	17939	8663	8013	5484	6541	12262	14545	15565	16191	18278	18888	14439	16436	14464.2
1790	unknown2068	0.0419656	0.0850707	18	12	730.441	0.898154	1	27.8233	12	10331	0.161257	0.290691	22.9117	12.578	9143.23	1710.66	0.187096	8551	8402	11171	9607	8538	7755	10344	9571	9476	10584	11400	9864	7923	6743	7391	8200	9095
1818	unknown2093	0.000987235	0.00453311	24	21	5777.95	0.0531238	0.278977	22.5575	17.9999	11725.2	0.000569336	0.00292435	23.2788	19.4722	7815.91	5880.45	0.752369	13171	8189	10298	16950	2368	3249	1468	1553	4191	8831	7261	3626	8217	14530	11529	12625	8003.5
1821	unknown2096	0.0419656	0.0850707	18	6	1616.09	0.886535	1	20	5.99999	23150.5	0.159655	0.288766	19	6.01666	9417.16	14632.4	1.55381	520	408	450	423	22785	2680	285	66852	9341	236	317	185	14476	1889	676	781	7644
1822	unknown2097	0.0210199	0.0497627	18	6	7118.27	0.603009	1	20	6	74130.5	0.0680417	0.144564	19	6.01667	25837	49759.6	1.9259	526	420	451	374	89468	10514	475	196065	10446	287	346	201	5407	1033	485	416	19807.1
1829	unknown2102	0.0499351	0.10099	18	15	453.963	0.910909	1	20	12	5449	0.186055	0.32722	19	13.6167	4378.15	1280.46	0.292465	3780	5013	5279	4503	2909	3437	4679	4503	4886	6759	5109	5042	3293	4293	2985	3382	4365.75
1835	unknown2108	0.0419656	0.0850707	18	6	3043.39	0.740279	1	20	5.99999	9433.5	0.138917	0.25838	19	6.01666	5791.79	4090.85	0.706318	3020	2109	1877	3314	12687	12872	3072	9103	6033	2889	3610	924	6685	7415	4390	4737	5296.06
1841	unknown2113	0.0144977	0.0373217	24	12	5948.71	0.368295	0.783857	24.1644	12	24997	0.0332788	0.0809535	24.0822	12.0001	19696	7778.32	0.394919	13115	20578	13237	9050	25151	33400	14035	21557	18449	27017	33752	20770	21165	16972	13261	13962	19716.9
1844	unknown2116	0.00980952	0.0273153	18	9	2184.25	0.412936	0.843123	24.0327	6.00003	6503	0.0263655	0.0668087	21.0163	7.87757	4772.17	2796.51	0.586003	1767	4148	2171	1599	6135	10425	4303	5149	3475	13570	5790	3162	2519	2505	1746	2060	4407.75
1845	unknown2117	0.00980952	0.0273153	18	9	2779.28	0.379424	0.799079	24.0327	12	7605.25	0.0245408	0.0631008	21.0163	10.501	5499.74	3411.29	0.620263	1986	4651	2466	1674	7249	11620	5305	6009	3907	16062	6738	3714	2881	2699	1968	2280	5075.56
1850	unknown2121	0.0299489	0.0655606	24	6	1755.92	0.326608	0.723383	21.6708	6	8363.75	0.0550434	0.121477	22.8354	6.01565	6229.48	1523.8	0.24461	4725	6927	8092	7299	7094	8982	12327	5052	3587	6199	5929	4258	3173	5592	4488	5046	6173.12
1852	unknown2123	7.77e-06	0.000118884	18	0	17013.3	0.0395321	0.252097	25.8651	17.9999	22694.4	4.91e-06	7.56e-05	21.9326	18.5979	20045.2	15629.5	0.779712	37866	42802	52351	33073	11192	9556	9695	7188	9240	12671	14062	12509	24709	23246	18322	24501	21436.4
1857	unknown2128	0.00267199	0.0100694	18	12	340.295	0.537513	0.989976	25.8651	12	5991.25	0.0108374	0.031736	21.9326	12.3986	4989.91	1477.79	0.296156	4162	5828	5078	4545	4661	5297	5416	5194	5134	8004	5336	5491	3799	3960	3068	3585	4909.88
1858	unknown2129	1.91e-05	0.000238238	18	0	3969.34	0.0263559	0.240485	24.1644	17.9999	8650.73	7.8e-06	0.000104345	21.0822	18.3931	6007.94	4410.36	0.734088	8375	11416	13219	9921	3063	3199	958	3001	3467	4281	5269	4334	8433	9992	8430	7748	6569.12
1861	unknown2131	2.89e-06	6.22e-05	18	0	16759.1	0.0174066	0.240485	24.1644	17.9999	32897.9	8.95e-07	2.42e-05	21.0822	18.3931	22802.9	16389	0.718722	37747	40603	48158	34648	12222	10078	11608	8397	13665	17551	17870	14074	37460	34744	29659	29729	24888.3
1866	unknown2136	0.0144977	0.0373217	18	12	183.494	0.470591	0.913339	26.3284	12	6045.25	0.0408499	0.0946896	22.1642	12.4391	5161.31	1433.9	0.277818	4364	6141	5195	4774	5204	6025	5833	4963	5149	8235	5338	5459	4007	3896	3085	3811	5092.44
1867	unknown2137	7.77e-06	0.000118884	18	0	5811.89	0.0475092	0.268862	26.1721	17.9999	7471.73	5.84e-06	8.46e-05	22.0861	18.6379	7030.86	5236.75	0.744824	12084	16783	17625	11642	4007	3415	4241	2420	3298	4367	4879	4731	8118	7649	6261	7859	7461.19
1870	unknown214	0.0210199	0.0497627	24	9	351.786	0.278575	0.654138	20	6	4092	0.0359556	0.0859677	22	7.425	3615.07	414.934	0.114779	3250	3074	3859	3172	3719	4233	4170	4246	3394	3491	3389	4037	3931	2884	3102	3333	3580.25
1879	unknown2148	0.00980952	0.0273153	18	0	2871.21	0.712479	1	20	12	14980.5	0.0416787	0.0963014	19	15.2	12952.4	4891.81	0.377677	15954	17937	16847	15973	7064	12733	11277	4380	13403	16165	15406	14948	6675	16209	14656	15544	13448.2
1882	unknown2150	0.00421867	0.0142044	18	12	663.973	0.288046	0.667686	20	12	6045.75	0.00937245	0.0282413	19	12.0333	5044.98	1193.4	0.236552	4026	5447	4535	5015	4412	4620	4725	5480	5433	6894	6433	5423	3898	4102	4060	3961	4904
1903	unknown217	0.0065055	0.0199214	24	21	3243.68	0.041775	0.256983	23.9024	17.9999	11142.7	0.00250313	0.00958315	23.9512	19.497	8639.17	3504.59	0.405663	8521	10648	11448	12625	4962	5590	6189	6847	4939	6579	6886	8539	10863	10462	9345	13901	8646.5
1912	unknown2178	0.000572095	0.00298095	18	15	9910.81	0.334523	0.735271	20	12	43745.2	0.00182982	0.00746057	19	13.6167	31179.7	14570.8	0.467315	26928	28756	40711	31072	24267	24623	22480	23658	36419	38360	54758	45444	27321	24286	18881	28654	31038.6
1913	unknown2179	0.00164724	0.00683195	18	15	1793.58	0.468359	0.91105	20	12	9111.25	0.00630098	0.0204369	19	13.6167	6672.4	2932.98	0.439568	5862	5822	8230	7391	5612	4973	4153	5141	7088	7187	12093	10077	5846	5451	4312	7066	6644
1926	unknown2190	2.89e-06	6.22e-05	18	15	846.407	0.251463	0.616205	20	12	4974.5	1.1e-05	0.000136434	19	13.6167	4254.96	1112.01	0.261345	4722	4372	4349	4879	2966	3359	3554	3752	5181	4534	5035	5148	4055	4195	3954	3852	4244.19
1954	unknown2215	0.00421867	0.0142044	18	15	467.044	0.922774	1	20	12	5190.5	0.0254929	0.0650851	19	13.6167	4740.97	765.133	0.161387	5140	4951	5249	5050	3541	3974	5043	4237	4829	5152	5694	5087	4512	4496	4391	4391	4733.56
1958	unknown2219	0.0419656	0.0850707	24	6	1383.1	0.240524	0.599578	20.9501	5.99998	6732.25	0.0564829	0.123833	22.4751	6.02774	4864.64	1622.17	0.333462	5841	3253	6867	3182	8028	6969	7936	3996	3890	4628	4603	3516	2987	3880	3081	3933	4786.88
1959	unknown222	0.0299489	0.0655606	18	0	1207.38	0.784907	1	28	12	3661.75	0.11167	0.216538	23	4.92857	3670.66	1798.88	0.49007	5171	4447	6950	4591	3407	2325	3030	1713	2680	3763	4431	3773	3298	2950	2373	4422	3707.75
1968	unknown2228	0.0419656	0.0850707	18	0	63615.9	0.85039	1	20	12	239450	0.154631	0.282035	19	15.2	220800	94703.7	0.428913	214311	284999	450531	304665	204311	147871	137085	98776	160272	277383	273027	247116	222602	216645	180055	266732	230399
1976	unknown2235	0.00267199	0.0100694	18	0	1942.78	0.437487	0.871394	20	17.9999	4700.5	0.00906138	0.0275339	19	18.05	4138.78	1545.71	0.37347	5048	5735	8460	6593	3132	2570	2179	2171	3198	3644	5374	4688	3062	4917	3901	6922	4474.62
1977	unknown2236	0.0419656	0.0850707	18	0	6213.52	0.77789	1	26.6465	12	17090.5	0.144357	0.266439	22.3233	5.02653	17014.1	8922.63	0.524425	19904	19394	28382	29655	14934	11951	8998	9509	10893	13797	22344	21328	12867	20049	17061	16039	17319.1
1988	unknown2246	1.91e-05	0.000238238	18	9	89486.8	0.0383933	0.251167	23.3952	6	173978	1.11e-05	0.000136778	20.6976	7.82849	102603	85721.2	0.835467	20829	20386	22158	11769	222964	202751	165245	104952	132688	160486	148047	69567	56349	46231	39781	21914	90382.3
1991	unknown2249	4.22e-05	0.000430754	18	9	5630.87	0.0594065	0.288288	23.1496	6.00001	11288.5	3.48e-05	0.000326366	20.5748	7.81003	6571.02	5447.59	0.829032	1339	1156	1074	651	15111	13888	9687	6468	8151	9026	9903	4248	4125	3353	2796	1336	5769.5
1992	unknown225	0.0299489	0.0655606	18	12	25006.7	0.545198	1	20	12	84369.5	0.0835161	0.170737	19	12.0333	49332.1	37737.5	0.764968	23299	78054	29307	27332	21882	35129	30571	31337	94254	64364	33200	145660	30404	20901	26794	25497	44874.1
2010	unknown2266	0.00267199	0.0100694	18	0	1104.85	0.189754	0.51656	20	17.9999	4322.25	0.00435377	0.0151056	19	18.05	3771.39	997.794	0.264569	3754	4919	6011	5604	3239	2544	2711	1896	3710	4293	4082	3759	4239	4388	3669	4993	3988.19
2014	unknown227	1.91e-05	0.000238238	24	6	1035.2	0.0246124	0.240485	24.1644	6	4862.5	7.32e-06	9.99e-05	24.0822	6.00007	3684.74	955.486	0.259309	3882	3867	3832	4577	4304	5362	4935	4849	3851	3282	2786	3536	2841	2102	3121	1870	3687.31
2018	unknown2273	0.000320124	0.00187824	18	0	2181.07	0.13931	0.430252	24.1644	17.9999	8147.24	0.000491359	0.00259359	21.0822	18.3931	7012.15	2408.62	0.343492	7832	11604	11440	8354	6073	4840	5473	3254	4858	7299	6021	7461	7968	8738	8037	7846	7318.62
2019	unknown2274	0.0144977	0.0373217	18	15	1573.49	0.86056	1	20	12	7305.5	0.0671709	0.142924	19	13.6167	7010.16	1507.03	0.214978	7537	9250	8309	9386	5279	6333	5776	4712	6578	7107	8692	6845	6573	6772	6486	6294	6995.56
2025	unknown228	0.000987235	0.00453311	24	6	282.136	0.0456802	0.263432	26.3284	6	4554.75	0.00049637	0.00261152	25.1642	6.01287	4226.46	319.451	0.0755836	4144	4662	4330	4223	4560	4511	4537	4611	4185	4139	4404	4307	3785	4137	3559	3729	4238.94
2029	unknown2283	0.0419656	0.0850707	18	0	2278.3	0.601928	1	20	12	8352.5	0.118181	0.226587	19	15.2	7369.37	2950.51	0.400374	6866	10103	12402	9482	5509	4497	6215	3428	5824	10456	8260	8870	7173	6654	8404	8552	7668.44
2034	unknown2288	0.00980952	0.0273153	24	0	5825.15	0.112224	0.379919	26.6465	6.63e-05	49209.2	0.00859956	0.0263651	25.3233	3.15e-05	38244.3	8765.45	0.229196	37962	50600	56784	51491	39522	33417	35997	27854	29143	32323	33091	32305	37453	35123	31762	41881	37919.2
2035	unknown2289	0.00267199	0.0100694	24	0	6405.68	0.104515	0.37048	26.0177	6.63e-05	46310.7	0.00256459	0.00979247	25.0088	3.19e-05	36388.1	8852.1	0.243269	36380	46361	55135	47367	37232	31005	33552	26373	28828	30330	31198	29833	36556	35325	31523	41048	36127.9
2042	unknown2295	0.000320124	0.00187824	18	0	1075.16	0.0852726	0.33277	20	17.9999	4249	0.000314163	0.00181377	19	18.05	3423.55	991.894	0.289727	3972	4556	4828	4422	3148	2060	2368	1243	2419	4091	3906	4216	4242	4158	4351	4245	3639.06
2048	unknown230	0.000987235	0.00453311	24	21	4190.31	0.132123	0.415161	23.7736	17.9999	8375.72	0.00129714	0.00563917	23.8868	19.4933	5024.08	5094.52	1.01402	3742	5400	9823	14818	613	667	778	1321	880	1527	2116	5594	6359	6798	6814	13532	5048.88
2049	unknown2300	8.77e-05	0.000728787	18	15	224508	0.0714225	0.307721	20	12	593485	8.13e-05	0.000628797	19	13.6167	366213	274253	0.748888	356529	466475	336041	270334	169887	190670	161050	189947	534105	607735	696813	535287	392259	441457	258820	209508	363557
2055	unknown2306	8.77e-05	0.000728787	24	0	3017.22	0.0256899	0.240485	25.1282	6.63e-05	9432.97	3.15e-05	0.000302658	24.5641	3.24e-05	5634.4	3895.14	0.691314	10493	10196	10240	6803	3484	3545	3723	3151	2674	3300	3612	2518	7776	7060	5770	4725	5566.88
2056	unknown2307	0.00164724	0.00683195	18	0	1727.82	0.0204012	0.240485	24.1644	17.9999	4210.74	0.000379772	0.00210822	21.0822	18.3931	2904.19	1821.76	0.627286	5053	3662	5116	5127	1800	1467	2150	1559	953	2178	1909	2359	3563	3952	4019	5309	3136
2063	unknown2313	0.0419656	0.0850707	24	15	17476	0.285787	0.664563	21.4599	12	70035.5	0.0650443	0.138945	22.7299	13.4582	47896.1	26402.4	0.551242	46880	28536	30679	17267	36288	40893	53465	28846	90072	83763	61668	44639	58409	74809	39739	22082	47377.2
2066	unknown2316	0.0210199	0.0497627	18	0	2621.24	0.254968	0.619883	20	17.9999	9358.49	0.0333832	0.0811162	19	18.05	7796.35	2255.28	0.289274	11051	11223	12067	7471	5972	5468	6062	3589	7886	9920	8832	5607	10955	11415	7494	7570	8286.38
2070	unknown232	0.000171384	0.00117234	18	12	289.207	0.117035	0.388921	26.0177	12	5081.75	0.000237023	0.00143943	22.0088	12.4118	4513.06	920.481	0.203959	4034	4476	4700	4561	5035	4805	5025	4157	4822	4911	5422	5172	3682	3666	3436	3537	4465.06
2074	unknown2323	0.000320124	0.00187824	24	9	735.391	0.0167909	0.240485	20	6	7635.75	7.06e-05	0.000563987	22	7.425	2776.14	3406.46	1.22705	588	557	791	526	6917	8793	8502	6331	794	1476	1514	755	572	650	551	527	2490.25
2075	unknown2324	0.000320124	0.00187824	24	9	5292.34	0.0161261	0.240485	20	6	44115.2	6.8e-05	0.000549615	22	7.425	16423.5	19645.7	1.19619	4003	3523	5123	3254	38706	51452	46880	39423	4966	9459	10752	4573	3409	3727	3794	3351	14774.7
2076	unknown2325	8.77e-05	0.000728787	24	9	5010.38	0.0159509	0.240485	20	5.99999	33065.2	2.03e-05	0.000218698	22	7.425	12566.9	14835.1	1.18049	2735	2977	3877	2674	27476	36381	36291	32113	3994	7588	9753	4093	2469	2630	3054	3045	11321.9
2077	unknown2326	0.000171384	0.00117234	24	9	3282.39	0.0162268	0.240485	20	5.99999	19538	3.84e-05	0.000346742	22	7.42499	7738.7	8582.86	1.10908	1996	2140	2755	2062	16200	21345	21398	19209	2676	4865	6611	2773	1734	1942	2273	2315	7018.38
2081	unknown233	0.000572095	0.00298095	24	9	140804	0.128048	0.408043	23.9024	6	839602	0.000770763	0.00374568	23.9512	7.49698	703291	162029	0.230386	589180	612005	667692	621813	1083436	879062	780972	614936	703959	764799	843209	809666	608905	572191	529176	566244	702953
2089	unknown2337	0.000572095	0.00298095	18	12	2093.39	0.143118	0.436098	20	12	12270	0.000852361	0.00404241	19	12.0333	9518.28	3236.55	0.340035	7189	7064	9913	7039	9493	9823	8060	11017	10829	12802	15318	10131	8720	6593	5262	6922	9135.94
2092	unknown234	0.000987235	0.00453311	24	9	4436.92	0.0837711	0.330198	25.1282	6	30005.5	0.000860121	0.00406482	24.5641	7.53842	26790.3	4526.11	0.168946	24122	26112	27094	25571	34633	29625	31229	24535	28126	29930	32542	29181	22970	23271	20231	21223	26899.7
2106	unknown2352	0.0210199	0.0497627	18	15	3947.42	0.170782	0.484908	20	12	26442.8	0.0237992	0.0615962	19	13.6167	24220.9	4479.31	0.184935	26075	26138	28189	23305	23180	19288	17433	18396	25986	28398	24190	27197	25730	24286	26251	22799	24177.6
2114	unknown236	0.00536208	0.0180123	18	12	4261.03	0.663041	1	20	12	22444.2	0.0236046	0.0611658	19	12.0333	17520.7	6306.52	0.359947	12349	15153	21595	15291	13427	12654	28845	15291	23590	27072	18076	21039	11303	11035	10625	11066	16775.7
2125	unknown237	0.00267199	0.0100694	18	12	135.411	0.207303	0.544345	25.8651	12	3938.75	0.00470744	0.0161005	21.9326	12.3986	3627.75	514.636	0.141861	3552	3335	3690	3715	4002	3861	3890	3406	3788	4032	4400	3535	3093	3244	2925	3130	3599.88
2136	unknown238	0.00164724	0.00683195	24	9	5050.16	0.0857218	0.333586	25.1282	12	32635	0.00139303	0.00597208	24.5641	10.4711	28791.7	5168.69	0.17952	26151	28504	28518	27322	35340	32661	33416	25841	30349	32324	35827	32040	24423	24924	21968	23056	28916.5
2141	unknown2384	0.0299489	0.0655606	18	15	3027.83	0.617016	1	20	12	9976.25	0.0922308	0.184718	19	13.6167	8237.95	3447.69	0.418514	9243	8541	13753	7745	7150	4300	4933	3805	7769	11297	12119	8720	9607	9071	6081	7139	8204.56
2147	unknown239	0.000987235	0.00453311	24	9	10157.4	0.121272	0.396908	23.9024	6	58208.2	0.00120087	0.00533714	23.9512	7.49698	48915.5	11250.1	0.229991	40661	43098	46369	42310	75125	59678	55668	42362	49594	55068	57430	55798	41416	40755	36521	40420	48892.1
2181	unknown242	0.00267199	0.0100694	24	9	1143.92	0.120205	0.395358	24.2975	6.00002	6254.75	0.00290465	0.0108611	24.1488	7.50953	5308.31	1187.86	0.223773	4488	4800	5004	4834	7864	6609	6057	4489	5254	6108	6203	6276	4496	4411	3899	4262	5315.88
2197	unknown2434	0.0210199	0.0497627	24	9	3319.51	0.268436	0.638458	21.253	5.99998	15486.2	0.0348561	0.0837087	22.6265	7.43634	11444.2	3948.49	0.345021	10305	9358	10580	5996	21927	15304	13489	11225	13902	13822	12721	7555	10943	9767	7054	5489	11214.8
2210	unknown2446	0.0065055	0.0199214	24	9	3829.34	0.160004	0.465123	23.6461	6.00001	15402	0.00818949	0.025347	23.8231	7.48928	11230.6	4396.54	0.391479	9350	9877	8807	9276	18551	12828	10563	19666	14799	11836	16763	7421	9514	7798	6454	5655	11197.4
2212	unknown2448	0.000987235	0.00453311	24	6	2000.05	0.0299036	0.240485	23.9024	6	9467	0.000337446	0.001915	23.9512	6.00003	6700.67	2654.56	0.396164	9067	6867	6423	5074	8408	8917	11091	9452	6248	7284	6991	5570	4509	4257	4070	2915	6696.44
2220	unknown2455	8.77e-05	0.000728787	24	9	2110.36	0.0215191	0.240485	20	6	9106.5	2.68e-05	0.000265746	22	7.425	4134.77	3635.89	0.879346	3038	2164	2069	2028	10934	7743	6444	11305	2924	3075	3694	1354	1754	1193	820	735	3829.62
2223	unknown2458	0.0144977	0.0373217	24	9	2308.35	0.249073	0.61208	24.9858	6.00002	7562.25	0.0239184	0.0618133	24.4929	7.53325	5671.38	2380.14	0.419676	5885	5872	4593	4115	7899	6342	5353	10655	7929	6768	10170	3411	4348	3379	2750	2077	5721.62
2225	unknown246	0.00980952	0.0273153	18	0	1254.76	0.500398	0.946167	20	12	5333.75	0.0310068	0.0761108	19	15.2	4566.5	1748.74	0.382949	5478	7287	5245	5680	2949	2840	3365	3320	4936	5055	6235	5109	5214	5502	4010	3675	4743.75
2228	unknown2462	0.000171384	0.00117234	24	6	3220.16	0.0186384	0.240485	20.5594	6.00001	10508.8	4.36e-05	0.000379311	22.2797	6.03599	6353.88	3425.97	0.539193	8071	7122	5566	4453	12364	9949	9513	10209	4366	5094	4944	3000	4700	3532	3156	2675	6169.62
2251	unknown2483	0.00980952	0.0273153	18	9	2200.87	0.272424	0.645647	22.7907	6.00002	9262.25	0.0185055	0.0499245	20.3953	7.78354	7292.11	2253.71	0.309061	6089	4800	5455	3796	12454	8775	8885	6935	8525	9879	7684	4917	6905	6736	5187	4111	6945.81
2256	unknown2488	0.000987235	0.00453311	18	9	2801.56	0.0336667	0.244945	20	6	10552.5	0.000375972	0.0020898	19	7.6	6989.41	3291.81	0.470971	3733	4220	3977	3841	11958	10654	9373	10225	5644	6372	7219	5115	5675	5938	3752	3781	6342.31
2267	unknown2498	0.000171384	0.00117234	24	9	2154.73	0.0144327	0.240485	23.0287	6	9189.75	3.44e-05	0.000323168	23.5144	7.47221	5990.57	2469.31	0.412199	7037	5693	5772	4576	9290	9623	9821	8025	5828	6871	5901	4325	2967	3170	3394	2738	5939.44
2271	unknown2500	0.000320124	0.00187824	24	9	2198.39	0.066979	0.301708	20	5.99999	10625.2	0.000251943	0.00150263	22	7.425	5701.33	3703.65	0.649612	4463	4222	3933	3095	14999	7045	7162	13295	5731	4518	5787	2019	3213	2625	2278	1863	5390.5
2275	unknown2504	0.0299489	0.0655606	18	15	1242.74	0.408682	0.835978	20	12	3821.25	0.0661315	0.140781	19	13.6167	3209.81	1271.47	0.396118	4255	3937	3635	3136	2103	1908	1429	2149	2808	4744	4979	2754	4187	3938	2630	2568	3197.5
2279	unknown2508	0.000320124	0.00187824	18	0	692.965	0.085755	0.333586	26.9725	17.9999	1585	0.000315785	0.0018207	22.4862	18.7462	1630.9	591.734	0.362828	2869	2726	2238	2265	1537	998	883	1435	1512	1270	1359	1273	1526	1555	1720	1539	1669.06
2282	unknown2510	0.0299489	0.0655606	18	15	5401.59	0.0497499	0.273235	20	12	12638.5	0.0111881	0.0326006	19	13.6167	10200.2	5149.58	0.504849	9933	11663	14394	11718	5540	4090	3968	3577	9565	15072	12446	13471	13140	9301	11421	13107	10150.4
2290	unknown2518	0.0144977	0.0373217	24	9	1008.69	0.248607	0.611419	20	6.00002	6854	0.0238804	0.0617695	22	7.42501	4739.59	1692.28	0.357052	4045	3882	4158	3419	10097	4070	5544	7705	4760	4886	5035	2851	4450	3847	2532	2280	4597.56
2293	unknown2520	0.0419656	0.0850707	24	9	2874.57	0.165568	0.475403	20	6	12999.5	0.0414754	0.0959341	22	7.425	9209.12	3204.43	0.347963	8266	7738	7288	5209	13502	15128	13642	9726	7073	10739	11777	5510	9810	7701	5142	4792	8940.19
2303	unknown253	0.0065055	0.0199214	24	21	5278.91	0.258748	0.625211	23.6461	17.9999	9809.47	0.0124344	0.0354684	23.8231	19.4899	6392.45	6213.87	0.972064	4712	6358	12996	20657	450	493	867	2372	948	1675	2525	9747	8036	8201	7399	15602	6439.88
2306	unknown2532	0.0419656	0.0850707	18	15	1201.02	0.891964	1	20	12	4386.25	0.160404	0.289758	19	13.6167	3935.29	1250.08	0.317659	5267	5587	4393	4186	3869	2300	1730	3049	4816	4559	5313	2857	4515	3971	3610	2749	3923.19
2323	unknown2548	0.00980952	0.0273153	18	9	3557.45	0.173098	0.490198	23.9024	6.00002	13712.2	0.0125284	0.0356895	20.9512	7.8674	11135.5	3602.92	0.323553	7769	8325	9448	6505	18444	10174	15290	10941	9196	13309	17419	11583	8656	8520	8617	6313	10656.8
2334	unknown2558	0.0065055	0.0199214	24	0	2483.01	0.0597584	0.288995	26.6465	6.63e-05	16231.7	0.0034415	0.012484	25.3233	3.15e-05	12122.8	3310.54	0.273084	17302	17490	16706	13429	12607	12373	8607	10302	9584	9915	11271	7095	12115	11118	11702	10385	12000.1
2335	unknown2559	0.0144977	0.0373217	18	9	2521.01	0.464017	0.905692	24.0327	12	10594.2	0.0403739	0.093787	21.0163	10.501	8894.8	2727.15	0.3066	6531	6323	6929	6543	13449	7931	11700	8989	7435	10081	17847	7014	7390	7059	5984	5686	8555.69
2344	unknown2567	0.0144977	0.0373217	24	3	618.365	0.292433	0.675028	26.9725	6.89e-05	3540.74	0.0274018	0.0687747	25.4862	1.59292	2615.89	751.957	0.287457	4106	3005	4152	2900	1905	2648	3300	2708	1089	1470	1750	3527	2257	2405	2154	2273	2603.06
2357	unknown2579	0.00421867	0.0142044	24	9	921.36	0.359727	0.771862	23.7736	12	5158.25	0.0113676	0.0329903	23.8868	10.5073	4113.39	1256.26	0.305409	2952	3108	3627	4081	4519	4035	5191	5005	4019	4503	7946	4165	3727	3407	2565	2867	4107.31
2360	unknown2581	0.0210199	0.0497627	18	0	1052.35	0.149478	0.446371	26.8085	6.63e-05	4556.24	0.021249	0.0561026	22.4043	2.77e-05	3462.54	627.791	0.181309	4686	4922	4650	3967	3745	2695	2589	3107	2959	2874	3762	2497	3615	3853	3225	2864	3500.62
2367	unknown2588	0.0177588	0.0456354	18	9	70.0036	0.166744	0.477318	24.2975	6.00001	224	0.0202016	0.0538296	21.1488	7.89842	176.895	60.6253	0.342719	83	129	115	114	260	244	214	178	253	178	216	156	222	146	104	97	169.312
2379	unknown2599	0.0144977	0.0373217	18	12	385.55	0.619523	1	26.1721	12	7106.25	0.0513084	0.114755	22.0861	12.4253	6473.5	934.434	0.144348	6562	6424	6767	6068	6844	6382	7200	5778	6376	7735	7289	7025	6347	5666	5392	4972	6426.69
2380	unknown26	0.0419656	0.0850707	18	12	772.868	0.425912	0.858629	20	12	6323.5	0.0898049	0.181031	19	12.0333	5298.74	1260.14	0.237819	3838	5320	4507	5400	5829	6547	5396	3748	5118	6389	6491	7296	4748	3159	4299	4313	5149.88
2397	unknown2614	0.0210199	0.0497627	24	18	916.41	0.162583	0.469323	20	12	5508.75	0.0228248	0.0594296	22	14.85	4796.07	1725.94	0.359865	5707	4275	4603	4854	2644	3219	3696	4283	5319	5724	5825	5167	5954	7021	4289	4414	4812.12
2409	unknown2625	0.0419656	0.0850707	24	9	417.9	0.34505	0.750218	25.1282	6.00001	5342.25	0.0758035	0.157575	24.5641	7.53842	4686.62	509.866	0.108792	5450	4789	4665	4326	6265	5056	4669	5379	5197	5004	4950	3615	4211	4663	3710	3234	4698.94
2415	unknown2630	0.00267199	0.0100694	18	0	2353.6	0.18147	0.502086	20	17.9999	7338.5	0.00418535	0.0146741	19	18.05	6405.35	1789.88	0.279434	9853	8581	8994	7615	4778	4159	3462	3967	6256	7806	8177	5706	9084	8264	6216	5790	6794.25
2422	unknown2637	0.0065055	0.0199214	18	9	1831.05	0.0375509	0.249379	20	6.00001	8846.25	0.00227606	0.00885476	19	7.60001	6296.41	2181.57	0.346478	5217	4740	4587	3937	9968	9136	8465	7816	5313	5985	6517	4030	5264	5537	3799	3570	5867.56
2424	unknown2639	8.77e-05	0.000728787	18	0	1206.85	0.221692	0.569205	26.6465	17.9999	3062.5	0.00023033	0.00141065	22.3233	18.7014	3078.88	1086.55	0.352906	4818	5852	4177	3672	2626	1931	1974	2055	3187	2830	2936	2200	3095	3405	3008	2742	3156.75
2429	unknown2643	0.0299489	0.0655606	24	21	5269.71	0.326332	0.723142	23.6461	17.9999	16380.7	0.0550052	0.121477	23.8231	19.4899	12779.6	5831.73	0.456333	13433	18769	26531	9085	7101	11212	5854	7515	4582	12828	11592	11160	20111	19678	12532	13202	12824.1
2430	unknown2644	1.91e-05	0.000238238	24	0	4461.67	0.0280799	0.240485	25.5652	6.63e-05	11151.7	8.28e-06	0.000108932	24.7826	3.21e-05	4946.73	5782.43	1.16894	14001	11809	11188	7609	1373	1469	1262	1287	916	1214	1244	1535	7555	6127	4457	3933	4811.19
2441	unknown2654	0.0299489	0.0655606	18	0	1914.49	0.536687	0.988874	20	17.9999	6968.5	0.0824652	0.168842	19	18.05	6153.21	1399.88	0.227504	9073	8446	8592	5413	5100	4008	3802	3548	5394	8168	8518	5382	9081	8698	5450	4645	6457.38
2445	unknown2658	0.000171384	0.00117234	24	18	2428.74	0.0329299	0.244028	22.3291	17.9999	10135	7.38e-05	0.000582438	23.1646	18.0234	8153.36	1403.67	0.172158	7365	7418	7483	7081	5550	5521	6488	5686	9134	11322	9835	7702	11136	11320	9626	8458	8195.31
2447	unknown266	0.0419656	0.0850707	24	12	1257.59	0.717681	1	21.7778	12	7194.75	0.13561	0.253427	22.8889	12.0283	5856.04	1419.77	0.242446	4910	5137	2738	6181	6239	1940	7334	7704	7364	6993	7472	6950	5297	5939	5582	5124	5806.5
2448	unknown2660	0.000987235	0.00453311	24	0	1643.67	0.0716029	0.308192	26.9725	6.63e-05	8957.73	0.000746279	0.00365128	25.4862	3.13e-05	6152.54	2031.35	0.330165	9813	10164	8300	7554	5790	4546	4207	4783	5447	4473	5680	3604	5961	5960	5948	4885	6069.69
2455	unknown2667	0.0210199	0.0497627	24	12	1567.3	0.184401	0.506634	23.9024	12	6803.75	0.0253997	0.0649236	23.9512	12.0001	5434.51	2047.32	0.376726	5124	3980	3787	3510	6756	5899	5558	7543	9318	6258	6055	5584	5158	6050	3587	2733	5431.25
2462	unknown2673	0.0419656	0.0850707	18	0	2654.66	0.264771	0.634103	28	17.9999	11865.7	0.0611097	0.131973	23	18.8928	12598.3	1966.87	0.156122	18475	16316	14536	14509	12360	10650	10480	11523	12872	10775	13047	9894	12741	13582	11168	9972	12681.2
2464	unknown2675	0.0144977	0.0373217	18	15	2026.39	0.574628	1	20	12	11937	0.048217	0.10908	19	13.6167	9986.93	2696.63	0.270016	9523	9887	11718	10883	7632	8495	7756	8624	10031	13144	14099	10474	9963	11074	7657	8413	9960.81
2467	unknown2678	0.0419656	0.0850707	18	15	1672.48	0.464969	0.906083	20	12	6942.5	0.0963281	0.191243	19	13.6167	6239.57	1807.78	0.289729	8132	8568	6879	5955	4385	3576	4912	4771	7990	7087	6814	5879	7031	6078	6330	5166	6222.06
2470	unknown2680	0.0210199	0.0497627	18	15	2892.24	0.81877	1	20	12	17788.5	0.0871234	0.176796	19	13.6167	15646.2	3611.64	0.230832	15446	17084	20140	15771	12316	13524	12728	12961	15077	18701	20660	16716	15740	17057	12621	13237	15611.2
2478	unknown2688	0.0210199	0.0497627	18	9	436.108	0.347698	0.753897	24.8451	6	4242	0.0432573	0.099471	21.4225	7.94237	3982.12	357.436	0.0897601	3691	3376	3848	3284	4376	4310	4550	3732	3819	4307	4507	3968	3797	4159	3949	3389	3941.38
2483	unknown2692	0.0144977	0.0373217	18	0	891.662	0.167271	0.477847	26.4865	17.9999	3566.75	0.0170285	0.0465488	22.2432	18.6798	3549.88	845.966	0.238308	5834	4838	4799	3762	3661	3118	2605	2746	3067	3200	3389	2530	3838	4007	3690	2732	3613.5
2495	unknown2702	0.0065055	0.0199214	18	0	1904.24	0.205204	0.540142	27.1385	17.9999	5256.25	0.0101708	0.0302263	22.5692	18.7693	5449.88	1541.26	0.282806	9030	8827	6963	6429	5669	3905	3733	3979	5146	4920	5334	3739	5897	5976	4879	4273	5543.69
2497	unknown2704	0.0210199	0.0497627	18	0	2596.5	0.49799	0.943235	20	12	8812.75	0.0581947	0.12688	19	15.2	8227.37	2854.92	0.347002	10451	11622	11363	9023	6216	5782	6109	5306	9175	10040	10670	5366	10376	10373	7379	7017	8516.75
2498	unknown2705	0.0144977	0.0373217	24	0	7913.23	0.188156	0.514341	25.5652	17.9999	17092	0.0188336	0.0506834	24.7826	21.1158	16100.7	8682.89	0.539287	29545	36547	14778	24552	8971	6208	12277	11185	11809	14747	8623	5023	22840	22536	14312	8680	15789.6
2520	unknown2725	0.0419656	0.0850707	18	15	2374.11	0.721972	1	20	12	8609	0.13624	0.254057	19	13.6167	8181.2	2066.63	0.252607	10460	11098	9613	9618	6305	5502	5043	7058	7263	9841	10290	7042	8639	9334	6842	6631	8161.19
2522	unknown2727	0.0210199	0.0497627	18	15	540.937	0.190749	0.516861	20	12	4023.25	0.0261384	0.0664978	19	13.6167	3625.77	634.364	0.17496	3899	3685	3608	3717	3138	2977	3301	2630	3230	4095	4499	4269	3566	3901	3915	3484	3619.62
2527	unknown2731	4.22e-05	0.000430754	18	0	1744.43	0.0732088	0.310779	26.3284	17.9999	3864	4.23e-05	0.000370486	22.1642	18.6586	3797.7	1354.58	0.356684	5790	6402	5329	5358	2898	2789	2544	2750	3466	3335	3780	2572	3619	4129	4110	3598	3904.31
2530	unknown2734	0.00980952	0.0273153	18	0	1098.49	0.55098	1	20	12	5765.25	0.0336207	0.0815056	19	15.2	5524.94	1341.12	0.24274	7685	6922	6539	6076	4963	4494	4225	4177	5582	5888	6578	5013	5751	6557	5349	4775	5660.88
2533	unknown2737	0.00421867	0.0142044	18	0	1295.07	0.252185	0.616927	23.9024	17.9999	6011.49	0.00834706	0.0257244	20.9512	18.3644	5179.44	1463.96	0.282648	8059	6204	8012	4856	4771	4137	3568	3225	4568	5248	5424	3872	7117	6840	5500	4589	5374.38
2534	unknown2738	8.88e-07	2.53e-05	18	9	11623.4	0.0188207	0.240485	20	6	43659.2	3.16e-07	1.15e-05	19	7.6	24578.5	17159.3	0.698143	8379	8855	12390	9083	45956	44742	44151	39788	15156	22261	22180	17405	12934	13460	9388	13158	21205.4
2544	unknown2747	8.77e-05	0.000728787	18	9	2061.57	0.108404	0.375278	20	6	8009	0.000119428	0.000860441	19	7.6	5733.35	2260.1	0.394203	3632	3362	3522	3091	6561	7765	10684	7026	4630	5254	5502	5993	4496	5708	4232	3167	5289.06
2545	unknown2748	0.000987235	0.00453311	18	9	2730.49	0.0355551	0.246721	20	6.00002	7923.5	0.000395144	0.00217405	19	7.60001	4180.52	3054.84	0.730734	1227	1137	1663	2066	7627	7402	6604	10061	1794	3004	3110	2718	3385	1964	1369	2149	3580
2546	unknown2749	0.000320124	0.00187824	18	9	1833.17	0.0350506	0.245106	20	6.00001	5461.25	0.00013911	0.000959418	19	7.60001	2908.98	2127.86	0.73148	804	769	1074	1361	5458	4955	4697	6735	1248	1950	2296	2211	2254	1383	994	1662	2490.69
2552	unknown2754	0.000572095	0.00298095	18	0	1629.53	0.374683	0.792382	25.5652	17.9999	4274	0.00202519	0.00807466	21.7826	18.5596	4113.81	1460.79	0.355094	6827	7128	4746	5607	2701	2538	2204	3099	4423	3742	4567	3380	5333	4927	3373	3463	4253.62
2553	unknown2755	0.000572095	0.00298095	24	0	1373.2	0.0192248	0.240485	26.4865	6.63e-05	7806.73	0.000136575	0.000948093	25.2432	3.16e-05	5592.18	1853.92	0.33152	7624	8519	7619	7465	5402	5124	4634	4865	4924	3803	4157	3450	4659	5304	5788	5094	5526.94
2565	unknown2766	0.0210199	0.0497627	24	18	790.545	0.158266	0.462722	20.5594	17.9999	7172.5	0.0223082	0.0582949	22.2797	18.1079	6544.54	558.523	0.0853417	6983	6117	7025	5843	5860	5461	5997	5073	6461	7625	7832	6348	7236	7575	7658	6221	6582.19
2567	unknown2768	0.00421867	0.0142044	24	0	1202.79	0.0619698	0.293577	26.6465	6.63e-05	9900.73	0.00241806	0.00929857	25.3233	3.15e-05	7863.11	1653.07	0.210231	10618	10829	9367	8789	7733	7086	6767	7118	7845	6178	6613	5753	6629	8477	7633	7394	7801.81
2573	unknown2773	8.77e-05	0.000728787	18	9	14872.8	0.0185161	0.240485	20	6	64422	2.33e-05	0.000240462	19	7.6	42702.5	20312.9	0.475683	21750	25399	28798	24848	61618	67267	65336	63467	30525	42004	42611	36325	27697	27330	23537	30839	38709.4
2574	unknown2774	0.0419656	0.0850707	18	0	983.055	0.558142	1	20	12	8829.5	0.111353	0.216311	19	15.2	8155.4	1664.03	0.204041	10629	8944	9768	8061	7432	6900	6969	5643	9314	8851	9348	7805	9447	9315	7709	7050	8324.06
2586	unknown2785	0.00267199	0.0100694	18	0	996.667	0.328755	0.727393	27.8233	17.9999	4437.75	0.00706028	0.0224128	22.9117	18.867	4691.52	1004.19	0.214044	7103	7122	5592	5205	4299	3704	3823	3509	4645	4452	4497	4101	4560	5142	4419	3630	4737.69
2589	unknown2788	0.0419656	0.0850707	24	3	1924.39	0.101021	0.364821	21.8859	6.63e-05	10706.7	0.0274006	0.0687747	22.9429	1.43397	9366.96	1486.16	0.15866	10812	10888	11598	9529	11773	11649	10384	8904	7281	8439	8062	6805	9959	9803	7794	6754	9402.12
2592	unknown2790	4.22e-05	0.000430754	18	0	2099.75	0.0709881	0.306459	27.3065	17.9999	4226.75	4.11e-05	0.000364483	22.6533	18.7929	4480.62	1544.25	0.344651	6667	7904	6671	6323	3829	3208	3114	3351	4030	3741	4005	3353	4172	4730	4221	3784	4568.94
2598	unknown2796	0.0419656	0.0850707	24	18	587.429	0.130603	0.412782	20	17.9999	6343.75	0.0340168	0.0821947	22	18.15	5886.16	593.662	0.100857	6393	6130	6338	5557	5339	5092	4861	4587	5471	6173	7261	6366	6332	6931	6408	5704	5933.94
2599	unknown2797	0.0210199	0.0497627	18	15	1316.99	0.245044	0.608047	20	12	5445.5	0.0322883	0.0789432	19	13.6167	4787.92	1372.95	0.286754	6137	4942	6020	4282	3514	3432	3478	2957	5232	6136	5798	4616	5811	5619	4227	4193	4774.62
2604	unknown2800	0.0419656	0.0850707	18	0	17523.9	0.304555	0.693699	20	17.9999	100151	0.0685028	0.145472	19	18.05	89801.1	14486.4	0.161317	118428	108605	108540	86675	77769	68682	63640	56464	86355	114646	113885	82887	117879	117252	86993	78479	92948.7
2605	unknown2801	0.0299489	0.0655606	24	21	1289.41	0.273239	0.64703	20	17.9999	8232	0.0475091	0.107648	22	19.525	7373.96	1249.24	0.169413	9369	8807	8847	6910	6270	5535	5041	4541	6725	8842	9280	6734	9590	9879	7091	6368	7489.31
2612	unknown2808	0.00421867	0.0142044	18	0	1367.54	0.240386	0.599578	27.3065	17.9999	4671.5	0.00800511	0.0248474	22.6533	18.7929	4821.43	1059.03	0.219651	6401	7401	6042	5868	4439	3954	3429	4129	4875	4401	5067	3420	5130	5249	4554	3753	4882
2613	unknown2809	0.00980952	0.0273153	18	0	817.415	0.0926965	0.346946	26.9725	17.9999	3102.5	0.00727704	0.0229829	22.4862	18.7462	3178.22	755.255	0.237634	4662	4846	3873	4025	2915	2866	2235	2777	2872	2912	3017	2221	3420	3400	2880	2710	3226.94
2617	unknown2812	0.0299489	0.0655606	18	0	1227.18	0.500964	0.946824	28	12	4764.5	0.0780096	0.161541	23	4.92857	5058.77	1548.18	0.306038	8121	7049	5948	5657	5159	3761	3474	4618	4645	4712	5597	4104	5365	5328	4222	3691	5090.69
2618	unknown2813	0.00980952	0.0273153	18	0	1375.85	0.13079	0.413051	26.4865	17.9999	5057	0.00982587	0.0294029	22.2432	18.6798	5063.61	975.826	0.192713	7238	6570	6477	5850	5493	3982	4016	4319	4121	4832	5143	3923	5230	4747	5745	4506	5137
2633	unknown2827	0.00980952	0.0273153	24	3	3164.3	0.146453	0.44146	21.8859	6.39e-05	19321	0.0108401	0.031736	22.9429	1.43397	16876.1	2862	0.169589	22123	19193	19502	16466	21460	20154	18822	15496	12711	15143	14963	12123	18333	17519	14010	13083	16943.8
2636	unknown283	0.0144977	0.0373217	18	9	7799.39	0.299217	0.686234	20	6	170992	0.027938	0.0695639	19	7.6	60539.5	80888.5	1.33613	2614	215	145	263	388145	158881	6434	130508	10939	2158	1443	234	4591	1811	5063	773	44638.6
2638	unknown2831	0.00980952	0.0273153	18	0	793.374	0.414068	0.844519	24.8451	17.9999	4862.75	0.0264267	0.0668384	21.4225	18.4714	4608.36	848.082	0.184031	6576	5936	5066	5110	4337	3827	3050	4107	4338	4577	4911	3966	5500	5675	4290	3986	4703.25
2640	unknown2833	0.0299489	0.0655606	18	0	1394.06	0.860487	1	20	12	11804.8	0.120053	0.229303	19	15.2	11396.4	1687.79	0.148098	14240	13413	12384	12540	11266	10249	9321	9662	11982	11839	12564	10834	11477	12477	10534	10298	11567.5
2643	unknown2836	0.00421867	0.0142044	18	15	621.547	0.102452	0.366627	20	12	5565	0.00378038	0.0134929	19	13.6167	5066.34	718.918	0.141901	5012	5381	5435	4693	4699	4360	4473	4193	5255	5822	5709	5474	5067	5404	5283	4690	5059.38
2648	unknown2840	0.0299489	0.0655606	18	15	8549.98	0.589234	1	20	12	43234.5	0.088891	0.179607	19	13.6167	39406.4	8125.19	0.20619	45998	44553	46344	35569	35328	31040	28476	29916	39024	47943	49627	36344	45050	46152	36682	31198	39327.8
2654	unknown2846	0.000572095	0.00298095	18	0	1116.34	0.142432	0.436098	27.3065	17.9999	3916.25	0.000848667	0.00403373	22.6533	18.7929	4017.08	759.132	0.188976	5580	5120	4995	4929	3612	3299	3350	3335	3886	3899	3949	3349	4321	4188	3682	3474	4060.5
2671	unknown2861	0.0299489	0.0655606	18	0	508.763	0.319877	0.71478	28	12	3558.5	0.0541085	0.119964	23	4.92856	3696.78	610.994	0.165277	4428	4555	4628	3852	3167	3653	3421	3311	3590	3532	3775	3337	3866	3726	3429	3080	3709.38
2675	unknown2865	0.00980952	0.0273153	18	0	708.521	0.349275	0.756181	20	12	4970.25	0.0228745	0.059515	19	15.2	4673.04	1016.36	0.217494	6020	5499	5596	4418	3908	3824	4098	3314	4318	5510	5458	4595	5461	5423	4649	4326	4776.06
2676	unknown2866	0.0144977	0.0373217	18	0	7564.81	0.426103	0.858629	20	12	45608.2	0.0376016	0.089074	19	15.2	42094.3	10414	0.247396	54546	50736	51593	41542	36311	33241	33734	29290	40874	50665	51017	39877	51470	48977	40422	36103	43149.9
2681	unknown2870	0.0144977	0.0373217	18	0	1177.86	0.625247	1	20	17.9999	5963.5	0.0516991	0.11539	19	18.05	5589.08	936.228	0.16751	7892	7100	7718	5105	4033	4902	5031	4226	4426	5883	7034	5476	6995	6069	5823	4967	5792.5
2682	unknown2871	0.00980952	0.0273153	18	0	1164.25	0.227461	0.580039	20	17.9999	5506.25	0.0158537	0.0438367	19	18.05	4663.28	1116.24	0.239367	6952	6006	6056	4500	3818	2941	3279	2698	4437	5587	5910	4284	6548	6737	4736	4004	4905.81
2695	unknown2883	0.00267199	0.0100694	18	0	1306.38	0.161883	0.467927	20	17.9999	5837.25	0.00378301	0.0134929	19	18.05	5026.84	1189.58	0.236646	7369	7044	6444	4900	3844	3490	3903	3496	4584	5420	5979	4743	6718	6599	5047	4985	5285.31
2696	unknown2884	0.0144977	0.0373217	18	0	1280.22	0.103188	0.368042	20	17.9999	6734.75	0.0112273	0.0326709	19	18.05	5653.09	1275.89	0.225697	8183	7340	6888	5392	4454	3959	4510	3510	4971	6278	6432	6029	7520	7492	6048	5879	5930.31
2697	unknown2885	0.00421867	0.0142044	24	21	1134.73	0.0878094	0.337304	20	17.9999	6756.75	0.00329721	0.0120758	22	19.525	5840.6	1163.78	0.199256	7187	7493	7104	5419	4476	4439	4699	3824	5257	5976	6388	5880	7602	7526	6235	5664	5948.06
2703	unknown2890	0.000320124	0.00187824	24	21	2494.67	0.0403283	0.254561	21.5648	17.9999	11823	0.000158245	0.00106233	22.7824	19.4754	9355.91	2633.5	0.28148	12206	11803	9504	9566	6855	5654	6622	6033	7872	10108	9919	8576	13089	13577	10374	10252	9500.62
2704	unknown2891	0.00267199	0.0100694	24	21	15553.3	0.0709246	0.306459	20.0911	17.9999	72125.4	0.00181382	0.00740926	22.0456	19.5204	58447.4	15075.9	0.25794	74951	76949	66441	57948	44518	37531	42108	36109	51533	66104	61074	53137	84934	83644	60670	59254	59806.6
2705	unknown2892	0.00164724	0.00683195	24	21	1199.08	0.0726735	0.309721	21.6708	17.9999	6340.49	0.00120075	0.00533714	22.8354	19.4741	5111.58	1276.89	0.249804	5872	7021	4712	5396	3722	3432	3980	3304	4488	5426	5632	4510	7064	7368	5655	5275	5178.56
2706	unknown2893	0.0065055	0.0199214	24	21	1012.58	0.0662003	0.300098	20.7529	17.9999	5277.25	0.0037684	0.013463	22.3765	19.4938	4300.61	979.719	0.227809	5220	5095	4633	4381	3120	3010	3480	2561	3537	4815	4808	4205	5829	6285	4460	4535	4373.38
2713	unknown29	0.00421867	0.0142044	18	9	25063.8	0.292616	0.675028	24.4321	6	62429.8	0.00950173	0.0285712	21.2161	7.90912	46497.9	19507.7	0.419539	30674	26397	17055	22132	69287	84909	27003	68520	43053	44048	67131	58508	53738	39485	24382	29445	44110.4
2715	unknown2900	0.00980952	0.0273153	24	21	6354.77	0.190519	0.51656	20.7529	18	60020.2	0.0136101	0.038342	22.3765	19.4938	53875.3	6499.61	0.120642	60386	63618	57133	49991	48967	43428	50886	40594	49800	58294	55455	51096	66946	64810	55536	52789	54358.1
2718	unknown2903	0.00164724	0.00683195	24	21	1256	0.0746543	0.312463	21.253	17.9999	11508.7	0.00123017	0.00540227	22.6265	19.4807	10151.2	1325.94	0.13062	10518	12225	10877	9457	9180	8073	8631	7935	9469	10347	10800	10194	12413	12410	10815	10397	10233.8
2719	unknown2904	0.0065055	0.0199214	18	0	552.604	0.175662	0.494227	20	17.9999	4339	0.00888421	0.0270906	19	18.05	3928.34	521.944	0.132866	4491	5096	4504	3904	3567	2938	3991	2946	3677	4229	4031	3938	4443	4576	4217	4120	4041.75
2723	unknown2908	0.000987235	0.00453311	24	21	15459.7	0.138851	0.429141	24.1644	17.9999	137557	0.00135639	0.00584977	24.0822	19.5053	117810	18935.5	0.160729	120297	139381	116066	113425	106831	89608	106822	91365	102168	128483	109973	109258	150501	158957	119594	121178	117744
2724	unknown2909	0.000987235	0.00453311	24	21	4107.94	0.0858746	0.333586	24.1644	17.9999	32806	0.000879616	0.00413095	24.0822	19.5053	27505.3	5130.98	0.186545	29088	33520	24878	27567	24010	19885	24647	20688	23325	29454	26158	25354	34628	37642	29179	29775	27487.4
2726	unknown2910	0.000171384	0.00117234	24	21	3181.27	0.0738605	0.312054	24.1644	17.9999	28495.2	0.000155411	0.00104572	24.0822	19.5053	24331.5	4165.52	0.171198	25837	28559	22895	24780	21981	18401	22276	18344	21364	25410	22790	22453	29789	32505	25498	26189	24316.9
2727	unknown2911	0.000171384	0.00117234	24	21	2142.71	0.0601213	0.289572	23.7736	17.9999	15985	0.000128623	0.000906309	23.8868	19.4933	13506.6	2450.3	0.181414	13910	16630	13033	13291	12073	9642	11379	10675	11752	14188	12819	12965	15973	18373	14815	14779	13518.6
2730	unknown2914	0.00164724	0.00683195	24	21	1296.48	0.110512	0.377677	24.0327	17.9999	11137.2	0.00174964	0.00722205	24.0163	19.501	9616.21	1551.11	0.161302	9917	11517	9176	9798	8573	7057	8903	7854	8478	10155	9258	8607	11657	12864	10201	9827	9615.12
2731	unknown2915	0.0419656	0.0850707	24	21	428.153	0.287558	0.66727	26.0177	17.9999	7199.49	0.0653727	0.139372	25.0088	19.5924	6320.93	620.993	0.0982439	6319	7027	5987	5266	6249	5145	6196	4967	5821	6521	6257	6175	7465	8256	6578	6499	6295.5
2732	unknown2916	0.000320124	0.00187824	24	21	945.402	0.0388774	0.251167	21.5648	18	6461.5	0.000153008	0.00103358	22.7824	19.4754	5517.61	970.358	0.175866	5677	6594	6337	5395	4618	3961	4678	4183	5092	5976	5543	5235	6935	6972	6089	5850	5570.94
2738	unknown2921	0.000572095	0.00298095	18	0	1610.44	0.211643	0.551725	25.4179	17.9999	9906.75	0.00121311	0.00534903	21.7089	18.5412	9597.5	1324.28	0.137982	11796	11342	11594	10471	8553	8617	8501	8078	9670	9313	9951	8145	11203	10358	9330	8736	9728.62
2740	unknown2923	0.0210199	0.0497627	24	21	894.49	0.155505	0.459303	23.2718	17.9999	4954.99	0.0219767	0.0576023	23.6359	19.4815	4337.53	877.448	0.202292	5403	5678	3828	4728	3998	3295	3763	3125	4120	4799	3585	3481	5047	5442	4870	4461	4351.44
2742	unknown2925	0.0419656	0.0850707	24	0	6088.9	0.102257	0.366534	24.2975	17.9999	51355.5	0.0276838	0.0690499	24.1488	21.0192	48661.6	5670.34	0.116526	54967	55669	55770	49048	46132	44924	46373	40178	45952	46613	44251	42663	56352	53684	50930	44456	48622.6
2743	unknown2926	0.00421867	0.0142044	24	3	2795.72	0.056566	0.283157	22.9091	6.63e-05	13860.2	0.00222897	0.008695	23.4545	1.46594	11929.4	1860.97	0.155999	14342	14538	15164	11397	14010	14900	14804	11379	9363	10962	10066	8608	11288	11385	9321	9670	11949.8
2744	unknown2927	2.89e-06	6.22e-05	18	9	28865.9	0.0564025	0.282665	20	5.99999	88299	2.71e-06	4.95e-05	19	7.6	66542.6	25896.3	0.389168	35448	34580	43105	35624	96885	85982	91317	79012	51842	72266	82540	68065	50933	61074	48629	45930	61452
2745	unknown2928	0.000171384	0.00117234	18	9	7478.18	0.0579796	0.286613	25.1282	5.99999	23950.2	0.000124401	0.000887979	21.5641	7.96551	19509	6002.21	0.307664	12076	10122	14562	11032	27357	22869	23730	21845	18208	23108	25591	22207	17233	21151	15304	15362	18859.8
2747	unknown293	0.0144977	0.0373217	18	9	25.4558	0.938502	1	20	6	85044.8	0.0720749	0.151424	19	7.6	29298.5	40383.1	1.37833	23	20	12	15	17324	315121	34	7700	36	37	42	26	1278	44	32	18	21360.1
2750	unknown2932	0.0065055	0.0199214	18	15	47007	0.771903	1	20	12	101080	0.031606	0.0773625	19	13.6167	73016.2	46910.1	0.642462	49876	139381	115548	61950	39884	28891	37120	43349	105685	75977	112154	110504	59741	64754	52341	63836	72561.9
2754	unknown2936	0.0065055	0.0199214	18	15	3678.9	0.991459	1	20	12	10556	0.0389814	0.091584	19	13.6167	9030.8	4296.57	0.475768	6212	11623	23381	8339	5325	3408	5216	6320	9469	11964	10112	10679	8296	8718	6200	8565	8989.19
2786	unknown2965	0.00267199	0.0100694	18	0	1826.63	0.310316	0.703491	20	17.9999	7527.75	0.00671215	0.0215126	19	18.05	6736.43	1573.46	0.233574	9145	10356	7935	8145	5455	5523	4235	5276	6540	6801	8071	5660	9653	8222	6374	5862	7078.31
2802	unknown298	0.0210199	0.0497627	24	21	9599.15	0.123351	0.398731	22.6735	17.9999	24171.4	0.0180331	0.0489245	23.3368	19.4731	14076	10395	0.73849	26092	10435	6247	30445	2436	950	2806	3352	12588	14111	12166	11769	10949	30440	27605	27692	14380.2
2806	unknown2983	0.00980952	0.0273153	18	0	640.992	0.509378	0.957424	26.3284	17.9999	2877.75	0.0314744	0.0770946	22.1642	18.6586	2866.55	533.79	0.186213	3841	3967	3455	3179	2257	2389	2203	2627	2871	2710	3117	2410	3492	3271	2659	2089	2908.56
2807	unknown2984	7.77e-06	0.000118884	24	0	8372.85	0.0334268	0.244686	24.8451	6.63e-05	22332.4	4.2e-06	6.68e-05	24.4225	3.26e-05	12802.3	10429.4	0.814656	28431	17710	24693	18496	5863	6963	7363	8613	4904	5754	5823	6661	21436	17226	9816	12882	12664.6
2812	unknown2989	0.000320124	0.00187824	18	0	1428.71	0.0436818	0.259319	25.5652	17.9999	4127.25	0.000170287	0.00111805	21.7826	18.5596	3833.49	1150.72	0.300175	5294	5663	5476	4956	3126	3232	2485	3324	3563	2892	3650	2928	4698	3555	4298	3958	3943.62
2813	unknown299	0.00980952	0.0273153	18	6	224.153	0.908234	1	20	6	231176	0.0509673	0.114161	19	6.01667	77222	157301	2.03699	429	279	254	340	84288	820566	233	19617	208	169	120	129	3125	289	301	218	58160.3
2815	unknown2991	0.000572095	0.00298095	18	0	813.703	0.197002	0.525258	26.1721	17.9999	2831.75	0.00113726	0.00510296	22.0861	18.6379	2769.16	756.383	0.273146	4427	4131	3578	3111	2148	2224	1814	2340	2783	2405	2806	2207	3396	2633	2747	2551	2831.31
2823	unknown2999	0.00164724	0.00683195	24	6	1189	0.054411	0.28081	20.7529	5.99998	10210.5	0.000924948	0.00431576	22.3765	6.03174	8687.87	1280.74	0.147417	9148	8126	8974	8409	11300	9313	9805	10424	9414	7639	7792	7246	8123	7583	7374	7293	8622.69
2825	unknown30	0.0065055	0.0199214	18	9	5592.51	0.303981	0.692756	24.4321	6	14399.2	0.0142895	0.0399959	21.2161	7.90912	10886.4	4406.31	0.404754	7397	6354	3993	5411	15876	19463	6421	15837	10036	10434	15857	13693	12788	9552	5612	6830	10347.1
2826	unknown300	0.0210199	0.0497627	18	6	643.467	0.890203	1	20	6	62694	0.0931592	0.186232	19	6.01667	21652.2	42019.2	1.94064	707	893	732	540	24155	213852	641	12128	333	260	264	165	8866	457	663	309	16560.3
2827	unknown3000	0.0144977	0.0373217	18	0	968.206	0.322788	0.71749	27.8233	18	6137.5	0.029784	0.0734422	22.9117	18.867	6419.03	933.451	0.145419	8868	9054	7218	6719	6171	5820	5181	5929	6174	6315	6520	4872	6389	6748	6012	5401	6461.94
2833	unknown3006	0.0299489	0.0655606	18	9	1634.65	0.846157	1	26.1721	12	7186.25	0.118479	0.226998	22.0861	10.5848	6506.57	983.942	0.151223	4922	4883	4805	5079	6719	7499	5238	9151	9845	5874	7224	5802	9489	5672	5688	4951	6427.56
2834	unknown3007	0.00421867	0.0142044	24	0	460.15	0.148514	0.444554	24.2975	6.63e-05	3427.5	0.00524738	0.0174913	24.1488	3.3e-05	2979.4	552.417	0.185412	3476	3923	3453	2858	2854	2703	2614	2825	2638	2436	3022	2206	3374	3226	3356	2664	2976.75
2851	unknown3022	0.00421867	0.0142044	24	3	818.123	0.0957445	0.353351	23.6461	5.26e-05	6930.5	0.00356023	0.0128572	23.8231	1.48897	5873.05	1323.83	0.225408	6999	6215	8075	6433	6589	5785	5694	5919	5275	4405	5136	4306	5675	4786	5997	6749	5877.38
2852	unknown3023	0.000171384	0.00117234	24	3	903.329	0.0246603	0.240485	26.4865	6.63e-05	5632.24	5.65e-05	0.00046977	25.2432	1.57773	4049.68	1302.27	0.321575	5040	6006	6237	5246	4063	3835	3818	3489	2897	2399	3123	3409	3386	3404	3664	4456	4029.5
2868	unknown3038	0.0419656	0.0850707	18	0	494.975	0.523313	0.971717	26.0177	17.9999	3850.75	0.105819	0.206582	22.0088	18.6177	3789.82	417.492	0.110162	4527	4729	3956	4219	3678	3327	3093	3797	3892	3286	3962	3340	4609	3883	3525	3386	3825.56
2881	unknown305	0.0299489	0.0655606	18	0	10892.3	0.653271	1	27.8233	12	11062	0.096533	0.191562	22.9117	4.94082	11353	14796.1	1.30328	8482	27377	30082	30182	1259	658	6780	1240	5553	14458	12239	11998	4499	12489	8247	11409	11684.5
2887	unknown3055	0.00421867	0.0142044	18	15	1003.03	0.220016	0.566392	20	12	5030.25	0.00740897	0.0232976	19	13.6167	4335.74	1121.9	0.258757	5196	4746	4204	4117	3602	3182	3334	3031	4621	5901	5320	4279	4560	5269	4086	3750	4324.88
2895	unknown3062	0.00980952	0.0273153	18	15	824.84	0.968366	1	20	12	5260	0.0537327	0.119192	19	13.6167	4772.83	976.176	0.204528	5883	5361	5330	4906	4704	3946	3766	3708	5114	5817	5583	4526	4810	4834	4153	3773	4763.38
2896	unknown3063	0.00980952	0.0273153	18	15	939.568	0.566846	1	20	12	5745.75	0.0344309	0.0830563	19	13.6167	4719.99	1380.27	0.29243	5177	4713	4873	5184	3691	4254	3400	4016	6429	5543	5976	5035	5757	3645	3781	3832	4706.62
2898	unknown3065	0.0299489	0.0655606	18	15	1432.95	0.862951	1	20	12	6850.5	0.120323	0.229616	19	13.6167	6343.87	1387.06	0.218646	8007	8044	6702	6832	5983	4594	5002	4673	6733	7745	7586	5338	5961	6224	6433	5430	6330.44
2911	unknown3077	0.0065055	0.0199214	24	9	1460.53	0.0582493	0.286613	20	6	8338	0.00336429	0.0122724	22	7.425	6543.52	1593.14	0.243468	5260	5661	6173	4985	9364	8400	7925	7663	7120	6873	7221	4618	5787	5489	5241	4777	6409.81
2923	unknown3088	0.0210199	0.0497627	18	0	1027.6	0.184621	0.506848	20	17.9999	5201	0.0254253	0.0649509	19	18.05	4318.83	1041.52	0.241158	5776	4389	6572	4855	3456	3247	3307	2751	4904	4791	4498	3372	6252	5939	4346	4267	4545.12
2924	unknown3089	0.00344533	0.0129499	24	9	1679.56	0.0409538	0.254762	20	5.99999	12774.2	0.00139209	0.00597208	22	7.42499	9221.92	2630.82	0.285279	7525	6954	8290	7377	14681	12451	13511	10454	8261	9296	8365	7034	6982	6898	8985	6954	9001.12
2925	unknown309	0.00344533	0.0129499	18	6	76.7211	0.938148	1	20	6	124100	0.0217677	0.0572279	19	6.01667	41363.7	84526.4	2.04349	115	76	80	58	26988	459961	97	9354	58	31	28	13	864	63	109	38	31120.8
2928	unknown3092	0.0419656	0.0850707	18	0	867.974	0.604304	1	27.4766	17.9999	6730.75	0.118547	0.227025	22.7383	18.8171	6863.96	662.148	0.0964673	8057	8419	7931	7243	6826	6437	6899	5411	6917	6707	7206	5414	7659	7305	5879	6080	6899.38
2929	unknown3093	0.00267199	0.0100694	18	12	1618.74	0.0672501	0.301754	20	12	8136.75	0.0017294	0.007159	19	12.0333	6106.2	2233.84	0.365831	4411	4839	4742	4198	5535	5647	6366	6497	6961	8786	9648	7152	6121	5666	3583	3325	5842.31
2943	unknown3105	0.000171384	0.00117234	18	9	5290.93	0.158607	0.463406	20	6.00001	11838.5	0.000312952	0.00180919	19	7.6	7102.1	4608.1	0.648836	2353	2054	2279	1854	14414	15726	7303	9911	4465	5194	9835	4916	6256	6038	3296	3246	6196.25
2952	unknown3113	0.0144977	0.0373217	18	9	1483.51	0.0613431	0.292528	20	6	5889.5	0.00713694	0.0225797	19	7.6	4148.98	1539.06	0.370949	3122	2715	2485	2923	5941	6338	5642	5637	4798	3440	3738	2514	4441	2857	2789	2163	3846.44
2958	unknown3119	0.0144977	0.0373217	18	0	766.327	0.0737857	0.312054	27.8233	6.63e-05	3820.99	0.00838702	0.0258108	22.9117	2.73e-05	2906.47	462.728	0.159206	3871	4130	3542	3741	2672	2556	2248	2912	2755	2725	2573	2189	2788	2329	2836	2930	2924.81
2961	unknown3121	0.000320124	0.00187824	18	0	1461.41	0.128628	0.409226	26.8085	17.9999	5327.75	0.000456965	0.00243378	22.4043	18.7235	5388.28	1157.76	0.214866	7551	7484	7064	6265	4689	4063	4473	4660	5324	5011	5426	4153	5802	5481	4914	5114	5467.12
2968	unknown3128	0.00421867	0.0142044	18	0	1017.88	0.501208	0.946871	26.0177	17.9999	4553.25	0.0151371	0.0421775	22.0088	18.6177	4490.65	856.842	0.190806	6556	5712	5286	5072	4036	3550	3399	3689	4242	4660	4946	3663	5504	5088	3890	3731	4564
2974	unknown3133	0.0419656	0.0850707	24	15	2299.86	0.645793	1	22.1053	12	15181.2	0.124887	0.23676	23.0526	13.4611	12060.2	3336.83	0.276681	9928	8733	8553	11114	8885	9683	5738	14857	22664	12015	14309	11737	20125	11864	11138	10802	12009.1
2979	unknown3138	0.000572095	0.00298095	18	9	22675.9	0.0889718	0.340025	24.1644	6	94243.2	0.000554082	0.00285957	21.0822	7.88789	77662.1	20461.8	0.263472	49501	49215	69116	53213	101992	101873	94304	78804	76516	98462	92162	71702	80799	62064	60227	60830	75048.8
2980	unknown3139	0.0299489	0.0655606	24	0	641.169	0.202518	0.53547	26.9725	6.63e-05	5384.24	0.0370292	0.088097	25.4862	3.13e-05	4345.76	784.825	0.180596	5927	5185	5801	4624	4466	3683	4281	3247	4176	4455	3572	2949	3788	4270	4731	3865	4313.75
2995	unknown3152	0.0210199	0.0497627	18	0	2503.69	0.278145	0.653482	20	12	11941.2	0.035909	0.0859039	19	15.2	10711.2	3696.81	0.345136	15887	12626	13434	11780	8221	6830	8029	7129	12075	13886	12550	9254	11642	13275	10899	9857	11085.9
3000	unknown3157	0.0299489	0.0655606	18	0	1388.76	0.225938	0.577176	27.4766	17.9999	5536.25	0.040571	0.0941438	22.7383	18.8171	5740.51	980.164	0.170745	7677	7666	6885	7014	4911	5027	4471	5905	6073	5060	5672	4181	6816	5194	5322	4813	5792.94
3001	unknown3158	0.0065055	0.0199214	18	0	10504.8	0.236703	0.593189	20	12	36660	0.0115122	0.0332761	19	15.2	32553.9	12949.9	0.397799	45748	41787	41813	39905	23828	18400	22497	21477	46439	37937	29440	32824	36580	40769	33005	29415	33866.5
3005	unknown3161	0.0419656	0.0850707	18	15	362.039	0.971334	1	20	12	3795.5	0.171203	0.305065	19	13.6167	3487.09	461.127	0.132238	3559	3918	3776	3317	2985	3132	3522	3100	3805	4264	3832	3281	3606	3533	3313	2779	3482.62
3010	unknown3166	0.0144977	0.0373217	18	0	1199.96	0.480134	0.92358	20	17.9999	7086.25	0.0415385	0.0960288	19	18.05	6698.54	905.053	0.135112	8836	8348	7808	7044	5589	5958	6008	5650	7067	6855	6825	5990	8300	8049	6390	5606	6895.19
3013	unknown3169	0.000171384	0.00117234	18	0	401.106	0.21496	0.557388	20	17.9999	1831.75	0.000412944	0.00224912	19	18.05	1654.71	346.533	0.209423	2241	2165	2366	1755	1359	1184	1372	1399	1610	1754	1653	1495	1709	2126	2056	1436	1730
3017	unknown3172	0.00164724	0.00683195	18	0	991.717	0.395244	0.819247	26.3284	17.9999	3748.5	0.00542785	0.0180234	22.1642	18.6586	3738.92	803.042	0.214779	5051	5483	4764	4137	2999	2788	2686	3416	4286	3312	3791	3127	4386	3874	3593	3141	3802.12
3021	unknown3176	0.0210199	0.0497627	18	0	1012.58	0.484912	0.930704	20	17.9999	4835	0.0569376	0.124704	19	18.05	4402.19	883.371	0.200666	6161	5388	6403	4525	3071	3831	3416	3504	4006	4338	4751	4772	4459	6668	4718	3495	4594.12
3022	unknown3177	4.22e-05	0.000430754	18	0	823.779	0.126768	0.405556	26.9725	18	2479.5	7.03e-05	0.00056334	22.4862	18.7462	2530.41	764.022	0.301936	4203	3345	4107	2987	1863	1921	1846	2137	2308	2119	2566	1955	2570	2559	2366	2423	2579.69
3023	unknown3178	0.0144977	0.0373217	24	15	2301.46	0.23198	0.587316	23.9024	12	10185.5	0.0225161	0.0586821	23.9512	13.497	8275.11	2013.83	0.24336	6563	5718	7192	6063	5903	6350	7262	9847	11270	10218	10987	8267	11996	10390	7780	6568	8273.38
3026	unknown3180	0.00267199	0.0100694	24	15	2804.74	0.174035	0.49125	24.7059	12	13182.2	0.00403332	0.0142333	24.3529	13.5246	10684.7	2673.65	0.250232	8199	7196	9416	7323	8261	8253	9648	12771	14083	13358	14101	11187	15448	13151	10236	8597	10701.8
3027	unknown3181	0.0144977	0.0373217	24	15	6236.86	0.216211	0.559925	24.7059	12	31040	0.0212062	0.0560922	24.3529	13.5246	24768.6	7247.06	0.29259	19018	16135	20404	16692	20518	22068	20380	31220	35436	29737	33465	25522	37036	27749	21510	20149	24814.9
3030	unknown3184	0.0299489	0.0655606	18	9	670.337	0.885644	1	26.9725	5.99999	4477.5	0.122799	0.233414	22.4862	8.12258	4062.88	463.748	0.114143	3711	3342	3100	3175	4468	4385	3873	5184	5142	3840	4159	3728	5516	3946	3648	3281	4031.12
3032	unknown3186	2.22e-07	1e-05	18	0	1876.31	0.0691573	0.305476	26.0177	18	3771	2.92e-07	1.13e-05	22.0088	18.6177	3580.82	1503.89	0.419985	5560	6279	5591	5046	2382	2413	2372	2180	3114	3274	3502	2556	3719	3942	3919	3504	3709.56
3039	unknown3192	8.77e-05	0.000728787	18	9	9999.55	0.036387	0.247108	20	6	47428	4.36e-05	0.000379311	19	7.6	38150.5	10249	0.268646	26355	28952	26432	30601	46860	48562	43796	50494	40866	34046	40535	37472	37429	30159	28575	27038	36135.8
3048	unknown320	0.00421867	0.0142044	18	9	2215.9	0.114302	0.382478	20	6	19440	0.00416484	0.0146378	19	7.6	7470.54	8761.38	1.17279	607	272	254	261	23274	29077	3303	22106	2576	1164	482	418	5070	1832	880	396	5748.25
3052	unknown3203	0.0254844	0.0602662	24	9	524.143	0.138507	0.428854	23.7736	6.00002	6170.75	0.0234607	0.0608658	23.8868	7.49307	5629.29	575.693	0.102268	5059	5419	5452	5626	6369	5754	6469	6091	6195	5394	5321	6416	5106	5626	5034	4693	5626.5
3054	unknown3205	0.000987235	0.00453311	24	9	561.266	0.0662572	0.300098	23.3952	6	4899.25	0.000695639	0.00343685	23.6976	7.48208	4244.13	653.974	0.154089	3823	3999	4111	3972	5342	4846	4606	4803	5035	4227	4304	4093	4258	3647	3617	3088	4235.69
3057	unknown3208	0.00421867	0.0142044	24	9	2316.13	0.0754938	0.313996	23.1496	5.99999	13075.5	0.00288289	0.010789	23.5748	7.47537	10746.5	2548.59	0.237156	8706	9430	8984	9517	13483	12972	11280	14567	13598	10541	11827	10556	11320	9010	8176	7237	10700.2
3058	unknown3209	0.0299489	0.0655606	18	0	768.272	0.751092	1	26.6465	12	3861.5	0.107849	0.209882	22.3233	5.02654	3900.04	913.239	0.234161	4770	4227	4985	4723	3594	3255	3100	3375	4225	3724	4598	2899	4482	4114	3506	3323	3931.25
3059	unknown321	0.0065055	0.0199214	18	9	80983.7	0.077508	0.317023	20	6	427572	0.00433257	0.0150562	19	7.6	159781	195439	1.22316	21390	1355	2685	2704	494961	627639	115808	471878	45484	19292	5721	5703	99297	9086	13865	4930	121362
3060	unknown3210	0.0065055	0.0199214	18	0	2538.51	0.158905	0.463749	20	17.9999	10308.7	0.00814035	0.025213	19	18.05	9050.28	1916.18	0.211726	11243	11507	11015	11778	6844	7159	5782	8194	12034	7780	8984	7911	11872	9969	9661	9733	9466.62
3062	unknown3212	0.0299489	0.0655606	18	15	648.063	0.497342	0.943114	20	12	5157	0.0775536	0.160785	19	13.6167	4384.21	944.929	0.21553	4590	4667	3998	4030	3895	3695	3119	3978	5451	5522	5567	4088	5828	4400	3757	3416	4375.06
3068	unknown3218	1.91e-05	0.000238238	18	9	5368.53	0.0334536	0.244686	20	5.99999	18709	9.75e-06	0.000125211	19	7.6	13686.4	5441.59	0.397589	7699	8757	7869	8459	18234	20093	17871	18638	15538	12322	13874	12409	13379	9329	9012	8385	12616.8
3073	unknown3222	0.0419656	0.0850707	18	0	834.386	0.48779	0.935215	27.3065	18	3101	0.100075	0.197145	22.6533	18.7929	3188.08	569.048	0.178492	3789	4040	4527	3937	2210	2533	2896	3516	1876	2688	3039	4075	3173	3184	2982	3065	3220.62
3074	unknown3223	0.0419656	0.0850707	18	0	1820.27	0.411465	0.840795	26.0177	17.9999	7414.25	0.0873546	0.177081	22.0088	18.6177	7224.83	1341.69	0.185705	8512	8864	10095	8878	5095	5651	6592	7893	4179	5980	7066	8973	7241	7701	6962	7753	7339.69
3075	unknown3224	0.0299489	0.0655606	18	0	13752.7	0.445388	0.882218	26.8085	17.9999	47533.5	0.0709238	0.149627	22.4043	18.7235	47910.7	9807.86	0.204711	57369	61703	69433	61490	30981	35895	43868	53295	26329	40902	45198	60661	47860	51363	41906	49005	48578.6
3078	unknown3227	0.0299489	0.0655606	24	0	478.358	0.233692	0.589726	26.1721	6.63e-05	5573.49	0.0417271	0.0963619	25.0861	3.18e-05	4818.27	666.371	0.138301	5657	6114	5330	5193	4527	4947	3767	4985	4649	4385	4744	3447	5213	4290	4929	4581	4797.38
3092	unknown324	0.000171384	0.00117234	18	9	4511.34	0.0468179	0.266739	20	6	15298.8	0.000102168	0.00076538	19	7.6	5610.18	7309.72	1.30294	265	52	76	35	18215	22357	6410	14213	2182	844	540	178	560	436	236	173	4173.25
3121	unknown3266	0.0299489	0.0655606	18	0	574.171	0.807849	1	20	17.9999	3284.75	0.114236	0.220233	19	18.05	3210.74	403.9	0.125797	4232	3865	4037	3402	2876	2389	2968	2847	3633	3537	3103	2748	3565	3988	3187	2399	3298.5
3127	unknown3271	0.00980952	0.0273153	24	3	1825.4	0.0948454	0.351309	20.0911	6.00001	5819.75	0.00742441	0.0233067	22.0456	4.66969	4083.1	1964.34	0.481091	4014	5163	5361	4592	6980	5278	8066	2955	2409	2230	1997	1999	2972	2593	4091	3684	4024
3129	unknown3273	0.0210199	0.0497627	24	3	6214.94	0.102442	0.366627	20	6.00001	21273.8	0.0153763	0.042722	22	4.675	14581.6	7807.22	0.535418	12837	16168	24348	14389	21809	21982	29485	11819	8158	6569	5802	6341	12508	7781	14330	15145	14341.9
3130	unknown3274	0.00421867	0.0142044	18	0	1775.55	0.183062	0.504723	26.0177	17.9999	4723.25	0.00630655	0.0204396	22.0088	18.6177	4531.18	1360.87	0.300335	6635	6740	6308	5794	3795	3506	3054	3411	3761	4972	4621	2873	6190	4775	4360	3568	4647.69
3137	unknown3280	0.0065055	0.0199214	24	9	643.821	0.35402	0.76302	20.2759	6	5211	0.0162908	0.0448153	22.1379	7.42637	4510.25	650.624	0.144255	4266	4295	4018	3891	5085	5148	5019	5592	4343	4758	4994	4030	5458	3989	3395	3068	4459.31
3148	unknown3290	0.0299489	0.0655606	18	0	1923.51	0.685681	1	28	12	7438.75	0.100328	0.197374	23	4.92857	7505.59	2659.96	0.354397	10092	11811	9792	8051	5672	5593	5796	6804	7358	7889	8554	5954	7719	8224	6331	5327	7560.44
3159	unknown330	0.00267199	0.0100694	18	9	8509.85	0.276108	0.650637	20	6.00002	29848.5	0.0060584	0.0197686	19	7.60001	14831	12032.2	0.811287	5888	2088	3454	2452	52266	31746	20091	15291	8110	11393	8523	4675	21536	6297	2483	3159	12465.8
3160	unknown3300	0.0419656	0.0850707	24	3	1185.11	0.153249	0.455122	27.4766	6.63e-05	10389	0.0388868	0.0914114	25.7383	1.60868	8434.87	1200.27	0.142298	10256	12085	10652	8563	7766	7947	9728	7115	7795	7357	6615	7344	6890	7265	9181	8049	8413
3172	unknown3311	0.00980952	0.0273153	18	9	1345.62	0.023291	0.240485	20	5.99999	8103.75	0.00214402	0.00844732	19	7.6	5877.73	1782.91	0.303333	5057	4113	4885	4209	7429	8480	8420	8086	5848	4393	4240	5407	5100	4272	4303	4194	5527.25
3174	unknown3313	0.000987235	0.00453311	24	9	2210.59	0.0207541	0.240485	20	6.00002	11980.2	0.000241682	0.00145953	22	7.42501	7497.73	3444.03	0.459342	5663	4367	5194	5207	11754	12463	11040	12664	7719	5801	5767	6412	6664	4937	4648	5039	7208.69
3180	unknown3319	0.00267199	0.0100694	18	0	600.687	0.144561	0.43742	24.7059	17.9999	3197	0.00342192	0.0124303	21.3529	18.455	2849.32	709.541	0.249021	3970	3273	4388	3078	2464	2282	2468	2273	2458	2793	2919	1741	3317	2660	3836	2975	2930.94
3189	unknown3327	0.0419656	0.0850707	18	9	1907.6	0.368395	0.783857	20	5.99999	11452.2	0.0799201	0.164681	19	7.6	9815.27	1979.93	0.201719	7134	7977	8845	7161	14625	12082	8803	10299	9907	10505	10009	9852	11103	8500	6128	7887	9426.06
3207	unknown3343	0.0210199	0.0497627	24	15	1727.64	0.668099	1	23.0287	12	9105.25	0.0739468	0.154697	23.5144	13.4748	6785.76	2572.44	0.379093	4951	4593	3961	5226	4406	5671	3267	9607	14578	6544	8475	6824	12212	6326	6034	5557	6764.5
3212	unknown3348	0.000320124	0.00187824	18	0	49369.1	0.0541197	0.280545	20	17.9999	381392	0.000207265	0.00130067	19	18.05	340819	50030.5	0.146795	386165	380737	439634	368469	298201	269702	277048	284167	344676	338830	374911	338933	422458	368924	377694	356491	351690
3213	unknown3349	0.00980952	0.0273153	18	0	4823.88	0.16775	0.477913	20	12	38178.8	0.012193	0.0348487	19	15.2	36406.1	6734.02	0.18497	39651	40807	44981	40358	29774	30817	32280	29657	37043	38884	41240	35548	42541	36998	36669	36170	37088.6
3214	unknown335	0.00164724	0.00683195	18	9	3524.93	0.109524	0.376083	20	5.99999	15509.8	0.00173562	0.00717103	19	7.59999	7408.57	6327.99	0.854145	2008	1223	2073	1730	16398	6402	18295	20944	3855	4554	3869	2291	8575	3137	1505	1775	6164.62
3215	unknown3350	0.000572095	0.00298095	18	0	657.256	0.188499	0.514628	20	17.9999	4585.75	0.00109294	0.00493989	19	18.05	4241.76	630.211	0.148573	4890	4993	5875	4497	3600	3084	4031	3197	4198	4326	4313	4712	4584	4816	4772	4171	4378.69
3216	unknown3351	0.000129537	0.00107451	18	0	2879.69	0.076796	0.31549	20	17.9999	17557	0.00012453	0.000887979	19	18.05	15947.6	2503.03	0.156953	18272	18622	21180	17803	13297	11871	14140	12027	15379	16251	16927	17866	17038	18272	18257	16661	16491.4
3217	unknown3352	0.00980952	0.0273153	18	0	886.005	0.312178	0.704845	20	12	5845.25	0.0207888	0.0551227	19	15.2	5376.68	1350.51	0.251179	6054	6500	6988	5926	4040	3716	5279	3859	5029	5902	5708	6742	5186	5895	5963	5430	5513.56
3222	unknown3357	0.00980952	0.0273153	24	9	722.31	0.178007	0.498436	20.6557	6	4190.75	0.0128349	0.0364188	22.3279	7.42933	3413.31	678.435	0.198761	2930	3673	2922	2766	4197	4029	4051	4486	3840	3334	3942	2436	3580	2977	2623	2062	3365.5
3226	unknown3360	7.77e-06	0.000118884	18	0	1404.84	0.11847	0.391585	25.1282	17.9999	4149.75	1.37e-05	0.000160492	21.5641	18.5055	3857.05	1172.94	0.304104	5281	6075	5069	4998	2697	2819	2614	2968	3840	3709	3797	3227	4565	4237	4470	3327	3980.81
3228	unknown3362	0.000171384	0.00117234	18	9	1899.47	0.063119	0.295116	20	5.99999	8396.25	0.00013451	0.000937885	19	7.59999	6896.52	1771.68	0.256895	4537	4762	5822	5211	9009	8640	7794	8142	7617	7687	7405	5558	6813	5399	5571	4805	6548.25
3230	unknown3364	0.000987235	0.00453311	18	15	1242.56	0.146044	0.440677	20	12	8123.5	0.00141937	0.00606103	19	13.6167	6608.35	1739.65	0.26325	6172	6754	6080	6565	4974	5778	4902	5993	8790	8167	8907	6630	7900	6479	6069	5304	6591.5
3233	unknown3367	0.00421867	0.0142044	24	21	789.131	0.108962	0.375609	20	17.9999	4084.25	0.00399228	0.014123	22	19.525	3375.14	813.443	0.241011	4480	3981	3145	4333	2243	2414	2075	2833	3783	2921	3454	3205	5265	3608	4001	3463	3450.25
3234	unknown3368	0.000987235	0.00453311	18	9	3576.19	0.109999	0.376519	20	6	14160	0.00109984	0.0049659	19	7.6	10971.1	3527.33	0.321512	8499	6514	8708	5354	14162	15777	13018	13683	12436	11211	12448	7716	10739	9991	7860	6327	10277.7
3238	unknown3371	0.000171384	0.00117234	18	9	363967	0.0531538	0.278977	20	6.00001	1538941	0.000114839	0.000832917	19	7.6	1.18552e+06	397013	0.334884	926482	734461	919956	592732	1611513	1681650	1412076	1450525	1370932	1233207	1250656	937265	1060272	1002785	835080	700094	1.10748e+06
3239	unknown3372	0.000572095	0.00298095	18	9	1395.48	0.0503717	0.27332	20	6	6838.75	0.000330089	0.0018856	19	7.6	5363.53	1649.64	0.307566	5009	3556	4235	2723	7095	6808	6971	6481	5924	5420	5948	4454	4827	4362	3781	3034	5039.25
3240	unknown3373	0.000171384	0.00117234	18	15	1380.98	0.256829	0.623009	20	12	7423.75	0.000485543	0.00256704	19	13.6167	6121.82	1904.73	0.311138	6299	6754	6281	6910	4339	4447	5125	4914	8223	7703	7376	6393	6649	5826	5527	4888	6103.38
3242	unknown3375	0.000572095	0.00298095	18	15	1267.84	0.128948	0.409643	20	12	6192.75	0.000775661	0.00376104	19	13.6167	4642.01	1866.23	0.40203	4572	4585	4174	4779	3326	3141	3326	3438	6691	6572	6626	4882	6227	4589	3712	3343	4623.94
3249	unknown3381	0.0299489	0.0655606	18	15	920.476	0.663879	1	20	12	4040	0.0977804	0.193594	19	13.6167	3403.72	997.65	0.293106	2742	4122	2964	4067	2282	1972	1850	3340	4382	3667	4511	3600	6161	2736	2510	3399	3394.06
3251	unknown3383	0.00164724	0.00683195	24	0	809.637	0.0909393	0.343901	26.8085	6.63e-05	6475.74	0.00146896	0.0062176	25.4043	3.14e-05	4828.88	1227.73	0.254248	7606	5907	7085	5305	4334	3990	4170	3700	3649	4556	4295	3536	4929	4770	4224	4441	4781.06
3252	unknown3384	0.0299489	0.0655606	18	0	2415.48	0.138169	0.428253	20	17.9999	23474	0.0268455	0.0676212	19	18.05	21521.9	2398.52	0.111446	24752	24345	25146	21620	18975	17825	18199	17448	22195	23253	24729	20306	26233	25419	21550	20694	22043.1
3257	unknown3389	0.0065055	0.0199214	24	18	634.098	0.152584	0.454393	23.52	17.9999	5759	0.00785683	0.0244397	23.76	18.0018	4859.21	819.612	0.168672	5179	4539	4843	4467	3827	3607	4322	3956	5572	4916	4937	4652	6857	4887	6667	4625	4865.81
3262	unknown3393	8.77e-05	0.000728787	24	9	1397.24	0.0161211	0.240485	20	6	7357	2.05e-05	0.000219774	22	7.425	4540.7	2298.36	0.506168	2806	2964	3253	2974	7989	6956	7654	6829	4613	4079	3838	3801	3641	2947	2885	2336	4347.81
3265	unknown3396	0.0065055	0.0199214	24	0	391.737	0.131865	0.414651	24.9858	5.87e-05	3450.75	0.00691516	0.0220653	24.4929	2.88e-05	2888.25	536.401	0.185718	3433	3815	3201	3354	2526	2796	3089	2940	2670	2354	2651	1870	3356	2918	2953	2155	2880.06
3271	unknown3400	0.0299489	0.0655606	24	3	573.817	0.246105	0.609282	22.6735	6.63e-05	5812	0.0435621	0.100119	23.3368	1.45858	5287.93	608.249	0.115026	5589	5897	5669	6093	5566	5725	5403	5580	4083	4711	5754	4225	5564	4516	5648	4717	5296.25
3275	unknown3404	0.0299489	0.0655606	18	6	1413.33	0.0533033	0.279085	20	6.00001	8895.25	0.0118771	0.0341033	19	6.01667	7319.73	1542.45	0.210725	6994	6890	6428	6588	8889	8112	8888	9692	7306	5737	6343	5647	7349	6273	6962	6027	7132.81
3280	unknown3409	0.0419656	0.0850707	24	21	994.899	0.0549709	0.281418	20	17.9999	7098.25	0.016314	0.0448419	22	19.525	6239.29	951.855	0.152558	7238	7177	7159	5953	5026	4912	4215	4451	6652	6426	7420	6213	8266	7334	6490	6303	6327.19
3284	unknown3412	0.00421867	0.0142044	18	0	681.651	0.377773	0.796377	20	17.9999	3100.75	0.0118598	0.0340764	19	18.05	2766.64	516.542	0.186704	3572	3673	2975	3361	2158	1898	2613	2019	4000	2678	2392	2320	3313	2966	3441	2683	2878.88
3286	unknown3414	0.000572095	0.00298095	18	0	937.27	0.471357	0.914416	25.7143	17.9999	4863.25	0.00248583	0.00952533	21.8571	18.5785	4770.74	897.283	0.188081	6320	7113	5524	4946	3926	3818	4157	3595	5087	4838	4642	4239	5284	5503	4402	4264	4853.62
3287	unknown3415	0.000171384	0.00117234	24	3	8901.77	0.108685	0.375582	27.4766	6.63e-05	46541.2	0.00022149	0.00136422	25.7383	1.60868	32384.6	10278.5	0.317389	42638	66706	38937	37884	33735	28804	38947	27891	23855	24679	24279	19223	27331	31892	22003	26353	32197.3
3290	unknown3418	0.0210199	0.0497627	18	9	14974.8	0.579213	1	20	5.99999	162985	0.0658469	0.140244	19	7.6	149580	14206.5	0.0949758	132808	149267	127146	122037	177840	150701	162378	161021	169747	143912	147192	131810	159948	143720	136124	132942	146787
3294	unknown3421	0.00164724	0.00683195	24	21	1315.57	0.0635952	0.295116	22.7907	17.9999	6859.99	0.00106473	0.00482417	23.3953	19.4742	5792.3	1391.02	0.24015	7190	7236	6664	5523	4864	3830	5188	3879	5488	5891	5716	4360	7715	6785	6907	6033	5829.31
3299	unknown3426	0.00421867	0.0142044	18	0	9971.09	0.44627	0.883159	20	17.9999	36946	0.0136965	0.0385354	19	18.05	33825.3	8240.22	0.243611	47896	57802	43558	34668	24639	20952	28843	23611	36142	40252	37818	25886	41221	41655	37652	27256	35615.7
3303	unknown343	0.00421867	0.0142044	24	3	435.224	0.948686	1	20	6	66767.2	0.026098	0.066434	22	4.675	18891.4	62987.6	3.33419	454	985	727	520	12714	251568	478	2309	110	187	164	108	314	263	234	197	16958.2
3310	unknown3436	0.000987235	0.00453311	24	21	1042.28	0.0546992	0.281292	22.7907	17.9999	5681.99	0.000584642	0.00297824	23.3953	19.4742	4589.17	1083.74	0.236152	5015	4628	5476	4790	3519	3522	3178	3198	5614	3725	4633	3862	6713	4956	5402	5657	4618
3315	unknown3440	0.0299489	0.0655606	24	12	5317.8	0.478321	0.922142	22.7907	12	41357.8	0.0751463	0.156575	23.3953	12.008	34227.7	6772.42	0.197863	30372	28283	27147	25214	35027	31010	28494	38290	49506	39022	45202	31701	48968	33680	27300	26323	34096.2
3316	unknown3441	0.00164724	0.00683195	18	9	1660.29	0.25334	0.618006	24.9858	6	5072.75	0.00366469	0.0131577	21.4929	7.95384	4031.32	1333.3	0.330736	2577	2252	2074	2532	5144	4735	4064	6348	6218	3670	4922	3468	5276	3265	2939	2647	3883.19
3327	unknown3451	0.0299489	0.0655606	18	15	1549.45	0.50674	0.955655	20	12	10102.8	0.078735	0.162732	19	13.6167	9081.84	1822.67	0.200694	11154	9910	8340	8998	7739	6992	6493	7891	11805	10208	9932	8466	11649	9432	8367	7651	9064.19
3333	unknown3457	0.0299489	0.0655606	24	21	375.12	0.383884	0.803578	21.995	18	4132.75	0.0628385	0.135033	22.9975	19.4716	3773.95	428.838	0.113631	3809	4372	3902	4057	3430	3530	2589	3726	4003	3544	3766	3432	4716	3400	4307	4108	3793.19
3339	unknown3462	0.00980952	0.0273153	24	21	1848.73	0.19036	0.51656	22.7907	17.9999	5452.99	0.0136003	0.0383413	23.3953	19.4742	4154.19	1945.1	0.468227	6619	5972	6348	3258	2236	2419	2475	2131	3329	3605	3727	3364	8249	6239	3962	3362	4205.94
3340	unknown3463	0.00164724	0.00683195	24	21	15445.7	0.143362	0.436098	23.1496	17.9999	39969.9	0.00220827	0.0086266	23.5748	19.4792	29503.4	16332.3	0.553574	50291	44103	47016	23488	14105	16080	13552	14655	21942	22715	25146	23931	60889	45756	29303	23932	29806.5
3343	unknown3466	2.89e-06	6.22e-05	24	9	2369.51	0.0134862	0.240485	20.5594	6	9641.25	7.03e-07	2.16e-05	22.2797	7.42847	6712	2685.96	0.400173	5233	4509	5872	5143	9930	10421	9374	8840	7586	6470	6542	6554	5027	4288	3885	4604	6517.38
3361	unknown3482	0.000779665	0.00403822	18	9	682.004	0.125041	0.401653	20	6.00002	2975.25	0.000997887	0.00459177	19	7.60001	2362.9	658.238	0.278573	1634	1707	1752	1803	2717	2721	2767	3696	3118	2139	2095	2017	1807	1803	2298	1662	2233.5
3363	unknown3484	0.0210199	0.0497627	18	0	5083.74	0.353536	0.762735	20	12	18907	0.0438598	0.100581	19	15.2	16945.7	6691.83	0.394898	24560	23691	17854	20719	10034	10262	12159	12093	26204	18917	15378	15129	21231	22865	16041	14847	17624
3366	unknown3487	0.0144977	0.0373217	18	6	1513.56	0.0651243	0.297456	20	6	8335.25	0.0075204	0.0235454	19	6.01667	6534.7	1560.24	0.238763	5637	7200	7184	6005	7516	7964	10867	6994	5040	4849	4958	4990	5762	5351	5791	5422	6345.62
3367	unknown3488	0.000171384	0.00117234	18	9	1534.07	0.105773	0.371371	20	6	5042.75	0.000216048	0.00133641	19	7.6	3753.83	1342.73	0.357696	2327	2076	2255	2519	5092	4852	4384	5843	4889	3279	2932	3345	3100	2346	3700	2899	3489.88
3372	unknown3492	0.00421867	0.0142044	18	9	1097.08	0.132531	0.416142	20	6.00002	4645	0.00474634	0.0161952	19	7.60001	3752.87	1023.4	0.272699	2170	2590	2524	3304	4360	4637	4637	4946	4955	3173	3217	3837	3733	2470	3156	3118	3551.69
3373	unknown3493	0.00421867	0.0142044	24	3	1869.59	0.0859773	0.333586	22.5575	6.63e-05	10168.2	0.00323606	0.011905	23.2788	1.45496	8850.42	1361.89	0.153879	9523	10501	11006	9643	10201	9570	10279	10231	9471	6444	7419	5837	9587	6731	7851	7641	8870.94
3375	unknown3495	0.00164724	0.00683195	24	6	2210.77	0.0123962	0.240485	20	6	11991.8	0.000240931	0.00145702	22	6.05	6621.95	5010.91	0.756712	3737	5118	5592	5723	13108	11653	11948	11258	5928	4371	3450	4711	3011	3067	4465	3838	6311.12
3387	unknown3505	0.0299489	0.0655606	24	15	801.152	0.348867	0.756052	22.2166	12	5544.25	0.0581058	0.126877	23.1083	13.4622	4437.89	1321.94	0.297876	3357	3577	3485	3627	3733	4299	3305	5137	7240	4795	5438	4704	6334	4142	3980	3546	4418.69
3391	unknown3509	6.49e-05	0.000660021	18	0	9711.4	0.0173844	0.240485	24.2975	17.9999	16892.4	1.66e-05	0.000186075	21.1488	18.408	10455.9	10152.2	0.970956	23357	22051	22394	17553	3741	4209	3837	3873	3873	4471	4597	5948	23057	19275	13715	11523	11717.1
3393	unknown3510	0.0299489	0.0655606	24	6	4218.42	0.029377	0.240485	20	6.00001	19960.5	0.00706998	0.0224271	22	6.05	13372.8	5762.77	0.430933	12981	11147	12177	10774	19767	21521	18161	20393	13175	8742	9542	8955	14463	6952	9567	9928	13015.3
3413	unknown3529	0.000572095	0.00298095	24	21	622.254	0.0561594	0.282403	22.5575	17.9999	2400.75	0.000364522	0.00204352	23.2788	19.4722	1861.98	666.733	0.358077	2443	1976	1807	2803	1243	1248	720	1529	1876	1604	1913	1367	2590	2031	2399	2583	1883.25
3414	unknown353	0.00267199	0.0100694	18	12	467.751	0.122077	0.397168	24.0327	6	3582.75	0.00294485	0.0109924	21.0163	9.62892	2948.68	942.187	0.319529	1491	1976	2805	2401	3254	3014	2786	5277	3440	3367	3228	3923	2337	2173	1690	1973	2820.94
3415	unknown3530	0.0144977	0.0373217	18	6	894.844	0.115717	0.385428	20	6	6393.25	0.0123984	0.0353889	19	6.01667	4660.46	1753.29	0.376205	3467	3796	4017	4003	6576	7379	7363	4255	3053	3458	3626	4176	4646	3580	4185	3588	4448
3417	unknown3532	0.0419656	0.0850707	18	0	758.372	0.139976	0.431786	20	17.9999	4819.25	0.0360509	0.086148	19	18.05	4198.52	707.51	0.168514	5125	4615	5329	4510	3589	3187	3000	3496	4879	4707	4594	3328	5498	3962	5040	4777	4352.25
3425	unknown354	7.77e-06	0.000118884	18	0	14503.5	0.0583257	0.286663	24.0327	17.9999	28229.2	7.07e-06	9.69e-05	21.0163	18.3786	21044.8	14824.3	0.704415	26007	40116	47989	38481	7549	6182	11386	6549	14761	20630	16589	18446	27517	31180	24588	29632	22975.1
3430	unknown3544	0.0065055	0.0199214	24	21	18172.6	0.016968	0.240485	20	17.9999	92853.7	0.00111617	0.00502914	22	19.525	74919.9	18955.7	0.253013	82335	85274	95190	84885	44603	43774	41385	43732	81623	86703	88137	77668	103776	97981	78180	91478	76670.2
3436	unknown355	0.00421867	0.0142044	18	6	162.635	0.913564	1	20	6	40322.8	0.0252772	0.0647251	19	6.01667	13534.7	27360.8	2.02153	250	183	148	138	15863	143648	199	1581	107	49	83	47	743	134	242	91	10219.1
3439	unknown3552	0.0419656	0.0850707	24	18	791.96	0.477822	0.921828	24.4321	17.9999	6519.5	0.0984441	0.194641	24.2161	18.0014	5707.17	360.029	0.0630836	4778	5385	4443	5509	4641	5064	4057	5936	8206	5473	6329	5376	8509	5964	6087	5518	5704.69
3441	unknown3554	0.0210199	0.0497627	18	9	1551.39	0.465309	0.906337	25.1282	6	9230.75	0.0550395	0.121477	21.5641	7.96552	8158.87	1371.82	0.168139	5287	6588	7615	6203	8732	8548	9472	10171	11724	7733	7890	7531	8921	6173	8093	7487	8010.5
3444	unknown3557	0.00980952	0.0273153	24	12	3224.58	0.285644	0.664563	24.9858	12	21602.8	0.0192707	0.0516032	24.4929	12.0049	17781.4	4019.47	0.22605	14323	12896	14068	12601	17620	17892	15964	21757	26597	20499	22311	17004	25191	17780	14773	14273	17846.8
3446	unknown3559	0.0144977	0.0373217	24	3	3422.4	0.0476252	0.268862	20.2759	6.00001	11923.2	0.00571571	0.0188206	22.1379	4.65913	8524.84	3824.98	0.448687	7697	10446	13038	8045	12551	11932	14202	9008	6134	4687	5362	4020	7065	4915	7783	7747	8414.5
3455	unknown3567	0.00164724	0.00683195	18	9	1801.18	0.18183	0.502157	20	6	8029.25	0.0027296	0.0102775	19	7.6	6284.15	1835.29	0.292051	4053	4792	4773	4049	7983	8665	5703	9766	7325	5590	7003	4662	6226	4977	5086	4121	5923.38
3456	unknown3568	0.0065055	0.0199214	18	0	2795.72	0.105001	0.371371	20	17.9999	7257.74	0.00566203	0.0186722	19	18.05	5412.02	2398.62	0.443202	9814	8904	6356	7032	2342	2422	1820	3342	4661	7338	7127	4742	8948	8745	6549	4789	5933.19
3457	unknown3569	0.000987235	0.00453311	18	0	933.027	0.136935	0.425343	20	17.9999	2210.25	0.00133955	0.00579445	19	18.05	1804.13	754.483	0.418198	3179	3088	2526	2340	705	729	579	1258	1752	2495	2280	1717	2797	2510	1919	1615	1968.06
3466	unknown3577	2.22e-07	1e-05	18	9	2923.36	0.0332907	0.244686	20	5.99999	6645.75	1.46e-07	7.34e-06	19	7.6	4437.62	2632.19	0.593154	1320	1339	1506	1631	6788	6616	6710	6469	4313	4011	5609	4703	2578	3609	2997	2524	3920.19
3472	unknown3582	0.0065055	0.0199214	18	15	1071.97	0.0756802	0.313996	20	12	6191.5	0.00424215	0.0148133	19	13.6167	5321.32	1323.63	0.248741	5280	5510	5540	5397	4178	4051	3730	4135	6306	6125	6626	5709	6734	6145	4585	4885	5308.5
3473	unknown3583	0.0299489	0.0655606	18	15	63823.5	0.0724929	0.309561	20	12	337970	0.0154853	0.0429817	19	13.6167	302613	67843.6	0.224193	316800	318731	315889	314076	227049	225020	194563	242965	339924	320074	376095	315789	402805	353395	274129	293989	301956
3474	unknown3584	0.00267199	0.0100694	18	15	21381.8	0.0737183	0.312054	20	12	121900	0.00187765	0.00759835	19	13.6167	106120	25195.5	0.237425	105544	109056	112124	110737	80465	82024	75525	85137	124159	117029	128697	117715	136393	116361	92473	100574	105876
3475	unknown3585	0.00267199	0.0100694	18	15	789.485	0.0494515	0.273235	20	12	4505.75	0.00131232	0.00568801	19	13.6167	3927.51	936.574	0.238465	4027	4014	4099	4045	3005	2975	2651	3220	4360	4552	4686	4425	4943	4287	3460	3946	3918.44
3483	unknown3592	0.000987235	0.00453311	24	21	3556.39	0.0698649	0.306266	21.8859	17.9999	14164	0.000729859	0.00358716	22.9429	19.4722	10740.6	3646.79	0.339534	11904	14048	10416	13986	6152	5716	5547	8793	14011	8922	10094	8371	17848	12162	14275	12371	10913.5
3485	unknown3594	0.0299489	0.0655606	24	6	651.952	0.1552	0.459053	20.6557	6	4734	0.0296143	0.0731071	22.3279	6.03384	3987.64	512.568	0.128539	4050	3868	4592	4033	4732	4378	4253	5573	4542	2980	3312	2996	3815	3130	3523	3596	3960.81
3486	unknown3595	0.0419656	0.0850707	24	15	3176.32	0.615094	1	28	12	22048.8	0.120207	0.229496	26	13.6964	19476.4	2984.33	0.153228	16661	14147	15740	14523	18538	18143	16087	26717	24779	20399	24258	18759	28735	21752	18098	16105	19590.1
3487	unknown3596	0.00980952	0.0273153	18	15	13358	0.211557	0.551725	20	12	127701	0.0148956	0.0415847	19	13.6167	112827	18758.4	0.166258	106933	102624	116086	113189	97282	94211	87025	102798	152738	116268	126211	115588	142580	107146	112784	108868	112646
3488	unknown3597	0.0144977	0.0373217	18	15	2301.28	0.112732	0.379919	20	12	15407.8	0.0121212	0.0346664	19	13.6167	13737.3	2635.25	0.191832	13111	13012	15600	14373	10751	11200	10828	11526	17375	14476	15772	14008	16887	13578	13257	13634	13711.8
3490	unknown3599	0.000572095	0.00298095	24	3	2149.25	0.0579867	0.286613	21.5648	6.63e-05	14218.5	0.000375321	0.00208887	22.7824	1.42393	12105.5	2677.85	0.221209	14935	14734	13619	13586	14077	13213	12363	14249	12127	8037	9741	7606	12566	9545	12693	11802	12180.8
3494	unknown3601	0.0419656	0.0850707	18	15	923.835	0.605827	1	20.7529	17.9999	12616.2	0.118782	0.227176	19.3765	16.4766	11768.3	744.076	0.0632272	11635	11225	13018	11007	11124	10317	10380	10981	13429	11675	13095	11791	15385	12831	11251	10998	11883.9
3503	unknown361	0.000987235	0.00453311	18	9	14408.7	0.0326474	0.244028	20	6.00002	36288.5	0.000365579	0.00204517	19	7.60001	17194.9	15719.7	0.914206	4101	3113	4302	3413	34747	28400	45014	36993	8891	15059	9231	5525	14096	5939	2864	3988	14104.8
3515	unknown3620	0.00215962	0.00893137	18	9	1455.23	0.121851	0.397168	24.8451	6	4714	0.00243225	0.00934484	21.4225	7.94237	3844.3	1303.58	0.339095	2168	1907	2546	2349	4635	4350	3636	6235	5993	4087	4376	3763	4376	2866	3002	2842	3695.69
3518	unknown3623	0.00980952	0.0273153	24	6	828.376	0.0591646	0.288288	20	6	5086.5	0.00490525	0.0165676	22	6.05	4025.47	769.349	0.19112	3783	4155	4450	3868	5174	4557	5249	5366	4298	3100	3067	2538	3739	2697	3898	3705	3977.75
3521	unknown3626	0.0299489	0.0655606	18	0	2340.35	0.247546	0.610392	20	17.9999	9784.5	0.0437738	0.100552	19	18.05	8586.09	1705.06	0.198584	11099	11262	10368	9334	7027	6386	5854	5719	6238	10301	12525	8054	9981	8800	9798	10559	8956.56
3522	unknown3627	0.0144977	0.0373217	24	21	13465.1	0.124923	0.401573	20	17.9999	164961	0.0132461	0.0374628	22	19.525	154545	12537.8	0.0811277	161446	162190	175097	157354	145349	135601	129336	130220	158897	140370	181671	153860	166288	167934	165825	159799	155702
3523	unknown3628	0.00267199	0.0100694	18	0	2491.49	0.247681	0.610392	20	17.9999	12425.5	0.00550655	0.018215	19	18.05	11168.2	2092.57	0.187368	14400	13660	14706	12659	10130	9330	10127	6833	9070	10274	12856	12219	10225	14313	13213	11951	11622.9
3524	unknown3629	0.0210199	0.0497627	18	0	380.247	0.20221	0.535188	20	17.9999	5713	0.0274608	0.0687747	19	18.05	5353.57	409.597	0.0765091	5741	5625	6331	5268	5228	4839	4588	4296	5371	5155	6291	5496	5941	5693	5600	5618	5442.56
3526	unknown3630	0.0299489	0.0655606	18	9	1263.6	0.369613	0.785676	20	6.00001	6107.25	0.0609217	0.131632	19	7.6	4943.13	1204.99	0.243771	3257	3895	3537	4042	5851	5810	5286	7482	6868	3951	5063	3373	5170	3774	4015	3926	4706.25
3528	unknown3632	0.0419656	0.0850707	18	15	765.797	0.839235	1	20	12	4657.75	0.153068	0.279773	19	13.6167	3948.03	1087.18	0.275374	3637	4182	5110	4087	2813	2628	4449	2594	3661	5781	4544	4645	3209	3926	3357	4377	3937.5
3530	unknown3634	0.0065055	0.0199214	18	15	1499.07	0.273664	0.647522	20	12	5585.5	0.0130515	0.0369365	19	13.6167	4723.05	1760.61	0.372771	5192	5862	5286	5877	3182	2698	2539	3810	5212	5694	6712	4724	4846	5419	4234	4009	4706
3531	unknown3635	0.0299489	0.0655606	18	0	1506.67	0.904196	1	28	12	7037.25	0.12481	0.236717	23	4.92857	6860.79	2101.87	0.306359	7968	9434	9832	7387	5280	4745	6988	5327	6015	7266	7679	7189	5503	7606	6912	5335	6904.12
3535	unknown3639	0.0419656	0.0850707	18	15	906.864	0.562362	1	20	12	7901.5	0.112017	0.217115	19	13.6167	7213.6	1100.92	0.152617	7009	7677	7761	7473	6199	5932	5717	7145	8601	6997	8430	7578	8558	7257	6287	6626	7202.94
3536	unknown364	0.0065055	0.0199214	18	9	4273.05	0.0297638	0.240485	20	5.99999	14940.8	0.00184907	0.00751076	19	7.59999	7009.97	6273.44	0.894932	1767	1540	1957	1596	13189	13141	17796	15637	3280	4895	3928	1939	5984	3090	1261	1428	5776.75
3553	unknown3655	0.0144977	0.0373217	18	6	1411.56	0.122524	0.397844	20	6	5368.75	0.0130261	0.036889	19	6.01667	4077.51	1364.25	0.33458	3097	3254	3071	3649	5219	5097	5219	5940	4342	2791	3351	3056	4728	3099	3416	3266	3912.19
3554	unknown3656	0.000987235	0.00453311	18	9	1368.25	0.313611	0.706521	20	6	4751	0.0028113	0.0105654	19	7.6	3572.85	1167.69	0.326822	2337	1797	2304	2434	4665	3865	4348	6126	4742	2833	2701	3064	2602	2382	3521	3772	3343.31
3558	unknown366	7.77e-06	0.000118884	18	0	4445.93	0.0417916	0.256983	24.9858	17.9999	7754.23	5.18e-06	7.76e-05	21.4929	18.4883	5996.02	4806.43	0.801604	7987	14118	13036	12568	2167	2131	3353	1763	3229	4979	4099	3850	7026	8550	6962	8479	6518.56
3559	unknown3660	0.0419656	0.0850707	18	15	3919.85	0.110093	0.376542	20	12	13548.8	0.029464	0.0728608	19	13.6167	11215.5	4464.04	0.398023	11968	13554	12339	12598	6403	6350	4578	8794	16919	12213	14062	11001	14074	13108	10885	9911	11172.3
3562	unknown3663	0.0419656	0.0850707	18	15	14058.3	0.250234	0.613572	20	12	73723.8	0.0583475	0.127026	19	13.6167	58579.6	19270.9	0.32897	52978	57747	56995	58687	37064	37562	30842	61314	95805	67710	71889	59491	81150	64290	50516	50248	58393
3564	unknown3665	0.0210199	0.0497627	24	18	911.991	0.400882	0.826974	20	12	7586.25	0.0486745	0.109828	22	14.85	6365.54	2314.65	0.363623	6517	5307	6434	6999	6121	4714	3362	4876	10912	6589	7322	5522	7495	6534	6839	6650	6387.06
3565	unknown3666	0.0210199	0.0497627	24	12	736.452	0.0638597	0.295735	24.0327	12	3769.5	0.0102196	0.0303503	24.0163	12	3249.68	839.522	0.25834	2582	3116	2308	2720	3742	3718	3240	4267	3661	3526	4092	3799	3529	2754	2554	2394	3250.12
3567	unknown3668	0.00421867	0.0142044	18	9	3331.71	0.312754	0.704959	20	6	11114.5	0.0100678	0.0299819	19	7.6	7936.35	3160.49	0.39823	3542	4942	4515	5019	9732	10329	8012	16385	10565	5089	7060	6734	7426	4481	7191	6019	7315.06
3575	unknown3675	0.000572095	0.00298095	18	9	3337.19	0.245772	0.609153	20	5.99998	10249.5	0.0013877	0.00596107	19	7.59999	7656.99	2965.99	0.387358	4514	3828	3701	4234	9975	11151	8484	11388	11602	6717	6991	5429	8972	4989	6213	4995	7073.94
3579	unknown3679	0.0299489	0.0655606	24	12	5109.2	0.716385	1	24.7059	12	29607.2	0.103881	0.203715	24.3529	12.0025	22683.3	7769.74	0.342531	12788	12830	15730	18482	19182	24130	16802	37057	47975	21900	27866	20688	35290	16845	20700	16114	22773.7
3580	unknown368	0.0144977	0.0373217	18	6	1599.12	0.278998	0.654777	20	6	91859.2	0.0263332	0.0668087	19	6.01667	31367.3	61758.9	1.9689	1699	1369	1108	857	204342	78607	1439	83049	1976	281	336	170	2881	1030	2048	941	23883.3
3581	unknown3680	7.77e-06	0.000118884	18	9	3237.13	0.021525	0.240485	20	6.00002	12116.2	2.78e-06	5.01e-05	19	7.60001	6036.26	5047.36	0.836173	1492	1913	1762	1867	10897	12141	11630	13797	5133	3768	3659	2305	3127	2342	2930	1942	5044.06
3586	unknown3685	0.00980952	0.0273153	18	9	739.457	0.759435	1	25.5652	6.00003	3474.5	0.0439501	0.100637	21.7826	8.00179	3119.37	548.639	0.175881	2448	2337	2374	2284	3578	3244	2736	4340	5037	2618	3408	2698	3956	2532	2936	2515	3065.06
3587	unknown3686	0.0299489	0.0655606	18	9	1000.2	0.95592	1	25.4179	6.00003	4601.75	0.130357	0.245838	21.7089	7.98949	3870.01	1143.66	0.295517	2422	2195	2153	2580	3748	4032	2817	7810	9078	3009	3530	2571	5626	2543	2990	2948	3753.25
3588	unknown3687	0.0210199	0.0497627	24	18	3411.61	0.311456	0.704845	23.9024	17.9999	21900.5	0.039469	0.092329	23.9512	18	18038.7	2733.43	0.151532	15631	15928	16592	17228	13581	14299	10718	17937	26192	14668	20403	17910	28258	17296	19605	22443	18043.1
3589	unknown3688	0.0419656	0.0850707	24	18	1234.61	0.152767	0.454627	20	12	11039	0.0387848	0.0912211	22	14.85	9533.68	3118.96	0.327152	9185	10259	9424	9637	7348	6750	6193	9076	13915	10061	10872	9308	11634	10004	9250	10087	9562.69
3591	unknown369	0.000987235	0.00453311	18	6	779.585	0.399662	0.826182	20	6	28408.8	0.00348702	0.0126139	19	6.01667	9705.81	19107.9	1.96871	682	303	235	138	55026	52681	1110	4818	384	101	85	47	1289	354	805	187	7390.31
3594	unknown3692	0.00980952	0.0273153	18	15	3080.16	0.134285	0.419519	20	12	18475.8	0.0100537	0.0299603	19	13.6167	15446	3941.27	0.255164	13109	15239	18460	14115	10562	11122	13629	12866	21144	19127	16776	16856	18351	13498	16641	15031	15407.9
3595	unknown3693	0.000320124	0.00187824	18	9	19991	0.312521	0.704845	20	6	56070.2	0.00102145	0.00467042	19	7.6	32578.3	22719.3	0.697374	11764	9803	9363	11091	39699	48628	35550	100404	56666	17141	21378	16611	25181	13201	19946	13369	28112.2
3596	unknown3694	1.91e-05	0.000238238	18	9	4715.52	0.0825056	0.327746	23.6461	5.99999	10643.2	2.26e-05	0.000237451	20.8231	7.8476	6625.98	4810.61	0.726023	1402	1296	1890	2080	9241	9289	7435	16608	11893	5246	8078	6961	4319	2850	3918	2903	5963.06
3597	unknown3695	0.0065055	0.0199214	24	18	849.942	0.0618269	0.293542	20	17.9999	6751.75	0.00354694	0.0128199	22	18.15	6019.84	726.5	0.120684	5712	6000	6664	6018	4630	4788	4088	5716	7348	6537	5995	6750	7381	5880	6769	6977	6078.31
3598	unknown3696	0.00421867	0.0142044	24	21	159939	0.119288	0.39279	24.5682	17.9999	763707	0.00432505	0.0150422	24.2841	19.5202	554812	175589	0.316483	523408	531477	527092	668578	398887	398799	179076	470426	722370	295601	599085	473721	888579	610165	713744	842344	552710
3599	unknown3697	0.0419656	0.0850707	24	18	1987.68	0.211882	0.551736	20.8511	17.9999	8278.24	0.0508842	0.114042	22.4255	18.0891	6280.56	1954.15	0.311142	5744	5050	7631	7593	4112	3919	2087	4274	11297	3763	6778	7029	9657	6525	7919	9012	6399.38
3600	unknown3698	0.0065055	0.0199214	24	18	1178.39	0.156251	0.460565	23.2718	17.9999	6070.99	0.00802151	0.0248805	23.6359	18.0042	4646.81	1321.47	0.284383	4123	4043	4740	5219	3150	3065	2388	3942	7233	3095	4860	4469	6739	5051	5643	6851	4663.19
3601	unknown3699	0.0144977	0.0373217	24	18	1089.47	0.175337	0.493634	20.5594	17.9999	5643	0.0177299	0.0482226	22.2797	18.1079	4598.91	1023.26	0.2225	4123	4087	5312	5325	3150	2922	2388	3942	7233	3970	4860	4802	5697	4376	5643	6856	4667.88
3605	unknown3701	0.0419656	0.0850707	18	15	126321	0.576005	1	20	12	612632	0.114155	0.220212	19	13.6167	509849	161551	0.316861	417478	447915	642247	645424	299750	381328	313545	446679	885719	476046	491395	597368	582990	450608	475250	578803	508284
3616	unknown380	0.0065055	0.0199214	24	3	135.411	0.971662	1	20	6	9282.5	0.0383305	0.0905461	22	4.675	2742.58	8578.1	3.12774	339	491	342	281	387	36477	164	102	81	100	85	64	200	209	199	148	2479.31
3620	unknown384	0.00164724	0.00683195	24	3	201.879	0.956289	1	20	6	14461	0.0117408	0.0338646	22	4.675	4243.44	13403.9	3.15873	339	633	740	316	2488	54832	287	237	107	128	165	68	296	251	199	227	3832.06
3621	unknown385	0.0210199	0.0497627	18	6	353.553	0.429535	0.862085	20	6	21979.5	0.0515303	0.115073	19	6.01667	7666.18	14713.6	1.91929	418	65	60	40	42765	40240	345	4568	402	53	50	24	3827	295	932	47	5883.19
3624	unknown388	0.00980952	0.0273153	24	3	1353.76	0.180276	0.501036	27.8233	6.63e-05	7006.99	0.0129761	0.0367954	25.9117	1.61951	4762.08	1247.48	0.261962	7278	7942	7423	5385	4844	5361	5227	2280	1374	3973	3287	5310	2980	4180	4656	4319	4738.69
3625	unknown389	0.0299489	0.0655606	24	3	1272.97	0.176247	0.495552	27.1385	6.63e-05	7663.98	0.0329591	0.0802482	25.5692	1.59811	5200.8	1456.83	0.280116	8145	8580	7968	5963	4845	5387	5665	2436	1541	4152	3734	5809	3394	4702	5332	5152	5175.31
3627	unknown390	0.000171384	0.00117234	18	0	2748.88	0.234164	0.589837	20	17.9999	3772.25	0.000446402	0.00239816	19	18.05	3271.73	1762.54	0.538719	5814	6648	6369	5372	1579	1463	1082	1549	1788	3881	2968	4873	2793	3761	4259	4276	3654.69
3628	unknown391	0.0419656	0.0850707	24	3	1331.48	0.182575	0.503855	27.3065	6.63e-05	7617.23	0.0449866	0.102468	25.6533	1.60336	5205.55	1417.9	0.272382	8039	8457	7960	6013	4787	5512	5792	2452	1667	4250	3609	5819	3384	4568	5579	4995	5180.19
3629	unknown392	0.0144977	0.0373217	18	6	4693.77	0.450791	0.887642	20	6	26008.8	0.0394121	0.0922845	19	6.01667	9756.25	16822.6	1.72429	2611	450	136	130	61600	28571	6718	7146	4293	585	344	75	3911	1998	4509	406	7717.69
3640	unknown401	0.000987235	0.00453311	24	18	1289.41	0.0744092	0.312463	23.9024	17.9999	4347.24	0.000772703	0.0037509	23.9512	18	2997.47	1070.38	0.357094	4044	1635	1471	3169	2566	1206	770	1995	3402	3390	3685	3265	3769	3924	4523	5173	2999.19
3643	unknown404	0.00267199	0.0100694	18	15	2423.79	0.204144	0.538387	20	12	6113	0.00464408	0.0159594	19	13.6167	4413	2956.11	0.669863	4701	5111	5431	6136	1908	305	3311	1297	4176	6209	6919	7148	2643	5151	4380	5324	4384.38
3644	unknown405	0.0065055	0.0199214	18	15	1492.7	0.943246	1	20	12	8026.5	0.0373916	0.0888203	19	13.6167	6910.73	1907.92	0.276081	6639	8738	8273	7835	5047	5322	5345	6803	7647	7813	8859	7787	5936	6887	5369	5976	6892.25
3646	unknown407	0.0210199	0.0497627	18	15	3432.65	0.829617	1	20	12	5794.5	0.0880481	0.178403	19	13.6167	4189.64	3440.89	0.821287	3248	7120	7958	6562	830	166	3143	695	2808	6073	7565	6732	1326	3885	2792	5598	4156.31
3647	unknown408	0.00164724	0.00683195	18	15	1396.71	0.792653	1	20	12	8291.25	0.00997682	0.0297928	19	13.6167	6945.87	2129.43	0.306575	6816	8515	8194	7730	4872	4849	5579	6811	7977	8057	9044	8087	6110	6885	5400	5878	6925.25
3650	unknown410	0.00421867	0.0142044	18	15	3952.73	0.771293	1	20	12	16493.2	0.0218915	0.0574486	19	13.6167	12233.6	5598.87	0.457664	10151	13837	18004	12800	7080	8038	12083	10236	16284	18585	15283	15821	9569	9806	8266	9027	12179.4
3651	unknown411	0.0299489	0.0655606	18	15	2501.57	0.978621	1	20	12	20841.2	0.132764	0.24951	19	13.6167	18293.3	3492.7	0.190928	17096	21201	21236	18871	16448	15714	17117	17469	18491	20090	23539	21245	16835	16850	14022	15927	18259.4
3652	unknown412	0.000320124	0.00187824	18	15	1800.65	0.302864	0.691303	20	12	8908.25	0.000992934	0.00457871	19	13.6167	7127.05	2457.94	0.344874	6471	7564	8638	7593	5498	4550	4887	6685	7613	10226	9373	8421	6994	6440	6070	6629	7103.25
3653	unknown413	0.000320124	0.00187824	18	15	1892.57	0.320321	0.715312	20	12	9169.5	0.00104442	0.00476036	19	13.6167	7502.2	2544.58	0.339178	7060	8623	9150	8025	5455	5007	4756	7092	8425	10174	9281	8798	7047	7188	6424	7136	7477.56
3654	unknown414	0.0065055	0.0199214	18	15	5348.38	0.449031	0.886052	20	12	20913.8	0.0199684	0.0533066	19	13.6167	15926	7094.25	0.445452	15820	17139	19627	16380	11311	13635	5912	11650	13496	20240	26207	23712	16655	16486	11907	13539	15857.2
3655	unknown415	0.00164724	0.00683195	18	15	3674.48	0.523336	0.971717	20	12	15008	0.00694492	0.022144	19	13.6167	11750.6	4931.07	0.419646	11607	13042	14749	12673	8276	10023	4908	8612	10141	14204	19173	16514	11940	12610	9096	9677	11702.8
3661	unknown420	0.0299489	0.0655606	18	12	869.034	0.434123	0.867446	26.3284	12	18690.8	0.0694632	0.14715	22.1642	12.4391	17099.4	2572.1	0.150421	14617	17596	18867	17016	18842	16966	18858	16145	16443	18428	20492	19400	14232	16010	13450	14251	16975.8
3663	unknown422	0.0499351	0.10099	18	6	42.0729	0.852457	1	20	6	3855.5	0.176939	0.313352	19	6.01667	1322.68	2588.55	1.95705	78	58	50	18	2422	12691	47	262	28	29	34	22	289	42	45	29	1009
3665	unknown424	0.0419656	0.0850707	18	12	1230.19	0.965488	1	20	12	18541	0.170417	0.303915	19	12.0333	16874.9	2181.91	0.129299	14681	17586	19090	17260	15129	15071	19091	15967	16576	18570	19269	19749	14052	16173	13192	14418	16617.1
3673	unknown431	0.0210199	0.0497627	24	9	10562.6	0.264268	0.633817	24.5682	6.00002	77948.2	0.0344018	0.0830323	24.2841	7.51859	70178.2	11070.4	0.157747	60505	67586	68654	66450	81068	84044	75795	70886	63336	75810	77899	93848	58778	53553	51733	75061	70312.9
3675	unknown433	0.0299489	0.0655606	18	12	842.518	0.591179	1	26.6465	12	16946.5	0.0891261	0.179998	22.3233	12.4676	15428.2	2450.68	0.158844	13197	16129	16728	15796	15318	13483	19437	15520	15853	16555	17480	17898	13052	14268	11898	12521	15320.8
3678	unknown436	0.00267199	0.0100694	18	9	1443.2	0.213854	0.555483	20	6.00001	5850.75	0.00483842	0.0164004	19	7.60001	4544.6	1370.84	0.301641	2797	3310	3125	3045	6428	6763	5076	5136	2838	4099	5822	4915	3507	3317	3288	4936	4275.12
3679	unknown437	0.0299489	0.0655606	18	12	1480.68	0.391876	0.814259	26.3284	12	35916.2	0.0639049	0.136916	22.1642	12.4391	31850.5	6977.91	0.219083	26899	31269	37183	31061	33234	36935	34878	31525	28730	35264	34768	44903	22831	22549	22517	29700	31515.4
3681	unknown439	0.00421867	0.0142044	18	15	12138.9	0.97174	1	20	12	53445.5	0.0266337	0.0672052	19	13.6167	48117.8	14067.3	0.292351	56460	64329	67394	51057	31689	34711	42639	38134	52023	52100	56475	53184	45573	44221	38557	39159	47981.6
3683	unknown440	0.0065055	0.0199214	18	15	1997.4	0.954308	1	20	12	11124.8	0.0377578	0.0893883	19	13.6167	10495.1	2229.12	0.212397	12616	13581	13856	10569	8195	8182	9473	8240	10576	11437	11478	11008	10531	10039	8222	9573	10473.5
3686	unknown443	0.00421867	0.0142044	18	12	1214.63	0.251886	0.616766	24.2975	6	8834.5	0.00833842	0.0257161	21.1488	9.66081	7235.11	2378.28	0.328714	3714	6309	6769	5716	6258	6618	14114	8348	8016	10808	7103	8486	4611	4862	4299	4801	6927
3687	unknown444	0.000320124	0.00187824	24	9	6864.24	0.0343717	0.244995	22.6735	5.99999	33917.2	0.00013663	0.000948093	23.3368	7.46339	27064.2	7273.71	0.268757	16815	25800	22868	24201	33766	31950	34551	35402	24817	30055	31993	29921	21461	24472	19633	22036	26858.8
3688	unknown445	0.000987235	0.00453311	24	9	5370.3	0.0393859	0.251536	23.6461	6	29422	0.00043374	0.00234176	23.8231	7.48927	24545.3	5679.33	0.231381	16342	23931	21541	23262	28544	27743	30199	31202	23067	27670	29332	28071	19770	22291	18765	20308	24502.4
3690	unknown447	0.0144977	0.0373217	24	9	579.297	0.181675	0.502157	24.0327	6	4015.5	0.0182772	0.0494936	24.0163	7.50102	3553.36	643.904	0.18121	2215	3738	3260	3327	3756	3429	4529	4348	3593	4084	4257	3888	3116	3451	2871	2999	3553.81
3697	unknown453	0.00980952	0.0273153	18	0	4373.28	0.215103	0.557388	28	18	11946.2	0.0151102	0.0421295	23	18.8928	13571	3646.95	0.268732	14928	24594	22197	18409	10388	9467	15008	9362	12188	11465	12117	11688	10851	12822	11862	12250	13724.8
3699	unknown455	0.0210199	0.0497627	18	12	2145.19	0.818874	1	27.1385	12	15066.2	0.0871323	0.176796	22.5692	12.5129	12423.6	3944.48	0.317498	9928	12313	16696	12228	10850	9758	18432	11332	14196	16980	13762	15327	8307	8548	8443	9326	12276.6
3700	unknown456	0.0144977	0.0373217	18	15	757.488	0.96936	1	20	12	5730.75	0.0739901	0.154697	19	13.6167	4889.1	1184.98	0.242372	4543	5238	6173	5289	4227	3380	5606	3832	5373	5683	6075	5792	3991	4618	4009	4213	4877.62
3701	unknown457	0.00421867	0.0142044	18	15	1050.76	0.916814	1	20	12	7745.5	0.0253533	0.0648818	19	13.6167	6574.13	1710.29	0.260154	6207	7151	8247	7130	5268	4469	7325	5180	7230	7732	8120	7900	5438	6277	5353	5894	6557.56
3702	unknown458	0.00267199	0.0100694	18	15	787.363	0.639105	1	20	12	5180.75	0.0125901	0.0358355	19	13.6167	4355.59	1512.94	0.347355	4444	5406	5247	5009	2492	1729	4780	3335	5586	5290	5077	4770	3683	4369	3935	4303	4340.94
3710	unknown465	2.22e-07	1e-05	18	0	2945.1	0.0194351	0.240485	24.7059	17.9999	3992.74	8.74e-08	6.62e-06	21.3529	18.455	2778.43	2587.56	0.931304	4972	6233	5771	6190	587	808	954	1077	1558	1532	1605	1959	4473	4569	3571	3358	3076.06
3712	unknown467	0.0144977	0.0373217	24	9	5881.71	0.279409	0.65503	25.2722	6	38021.5	0.026366	0.0668087	24.6361	7.54376	33120.5	5747.01	0.173518	29737	28342	41405	30409	40089	34446	47458	30093	32784	38721	35114	38061	25498	26364	25468	28445	33277.1
3726	unknown48	0.0419656	0.0850707	18	12	612.001	0.754772	1	26.3284	6	16639	0.141022	0.261735	22.1642	9.91357	14557.8	2099.26	0.144202	12583	14933	19522	12075	12259	13282	25682	15333	14572	15979	15593	14737	11484	11759	12122	8231	14384.1
3731	unknown484	0.0210199	0.0497627	24	6	719.835	0.0434711	0.259319	20	5.99998	5211.25	0.00730818	0.0230476	22	6.04999	4267.12	730.406	0.171171	4072	4988	3675	4066	5161	5139	5146	5399	3976	3250	3984	3354	3749	4347	3549	3694	4221.81
3738	unknown490	0.00267199	0.0100694	18	0	1406.97	0.678428	1	27.8233	12	6525.75	0.0132565	0.0374678	22.9117	4.94082	6543.98	2112.5	0.322815	7714	9511	8551	7555	5547	5175	6079	4276	6134	7044	6779	6146	7123	7372	5196	5259	6591.31
3739	unknown491	7.77e-06	0.000118884	18	9	15959	0.0251938	0.240485	22.2166	5.99999	34443	3.22e-06	5.55e-05	20.1083	7.74238	19597	16944.3	0.864638	3719	3970	3572	2259	35541	39638	38327	24266	25367	27234	24351	13510	8658	7919	6747	4101	16823.7
3740	unknown492	7.77e-06	0.000118884	18	9	7381.13	0.0255303	0.240485	20	5.99998	16354.2	3.26e-06	5.6e-05	19	7.59999	9359.21	8189.94	0.875067	1654	1794	1619	968	16924	19240	17560	11693	11752	12075	11217	5596	3784	3348	3047	1717	7749.25
3750	unknown500	0.0210199	0.0497627	18	0	24989.9	0.304787	0.693863	20	17.9999	92611.2	0.0387626	0.0912211	19	18.05	78153.1	24464.8	0.313036	78356	105244	127474	124589	67761	9443	69968	44187	62254	84774	93481	97524	83103	91445	85246	110651	83468.8
3755	unknown505	0.0144977	0.0373217	18	0	24814.1	0.37023	0.786603	20	17.9999	92204.7	0.0334255	0.0811688	19	18.05	79483.7	22264.7	0.280117	82451	109346	121968	117755	72403	14252	73514	46977	62117	83044	99969	96526	85402	88562	79388	115467	84321.3
3764	unknown513	0.0210199	0.0497627	18	0	1005.33	0.236496	0.593189	20	12	5299.5	0.0313385	0.0768379	19	15.2	4617.6	1694.06	0.366869	4650	6068	6442	5763	3403	2017	4017	3098	4438	5169	5701	5890	4363	5337	4602	5671	4789.31
3776	unknown524	0.0299489	0.0655606	18	0	2277.24	0.518564	0.965332	20	12	7240	0.080214	0.165079	19	15.2	6360.43	3438.29	0.540574	5378	10350	11186	9924	3877	2047	5556	2564	5134	7979	8350	7497	5298	7193	6067	8943	6708.94
3778	unknown526	0.00980952	0.0273153	18	15	970.504	0.806617	1	20	12	4380	0.0462037	0.104964	19	13.6167	3852.68	1070.48	0.277854	3374	4246	5418	4658	3416	2239	3229	2813	3625	4666	5057	4172	3400	4124	3462	3578	3842.31
3780	unknown528	8.77e-05	0.000728787	18	15	4026.62	0.117605	0.390213	20	12	11199.5	0.000128725	0.000906309	19	13.6167	7576.98	4638.26	0.612152	7692	10675	6652	6284	3659	4049	4523	4984	11922	10972	11683	10221	7434	9031	5734	4998	7532.06
3789	unknown536	8.77e-05	0.000728787	24	0	5438.36	0.0201086	0.240485	25.4179	6.63e-05	17046.2	2.51e-05	0.000254179	24.7089	3.22e-05	9985.54	6820.99	0.683087	17154	18831	18741	13459	5574	5470	7834	5452	4749	5968	5840	5214	12094	11166	10367	9518	9839.44
3796	unknown542	0.0419656	0.0850707	18	15	2044.25	0.957018	1	20	12	12924	0.169276	0.302502	19	13.6167	11245.6	2928.89	0.260447	10533	13401	13418	12984	6966	5933	13297	9936	14426	13383	12445	11442	9505	11092	10057	10658	11217.2
3801	unknown547	0.0299489	0.0655606	24	9	5518.26	0.19167	0.51806	24.4321	12	35235.8	0.0353618	0.0848291	24.2161	10.4875	31455.5	5282.64	0.16794	25385	29265	34817	27934	38986	33824	37752	28221	31423	35747	35896	37877	30082	26681	24284	25895	31504.3
3802	unknown548	8.77e-05	0.000728787	24	9	18259.1	0.0548966	0.281418	21.995	5.99999	116684	6.38e-05	0.000521944	22.9975	7.44876	86543.2	24239.7	0.280088	70143	93354	83917	72426	95837	102725	153723	114453	85449	88966	81750	80950	61284	64708	55769	62730	85511.5
3810	unknown555	0.0299489	0.0655606	18	15	416.486	0.988927	1	20	12	5778.25	0.133852	0.251009	19	13.6167	5077.53	841.943	0.165817	4812	5202	5371	5443	3977	3344	6645	4794	6509	5876	5236	5492	4516	4589	4456	4848	5069.38
3821	unknown565	8.77e-05	0.000728787	24	9	1670.54	0.0163881	0.240485	20	6	16194.5	2.08e-05	0.000222609	22	7.425	6085.48	7134.8	1.17243	1435	1544	2096	1309	13468	18063	18502	14745	1899	3525	3597	1987	1374	1298	1527	1418	5486.69
3822	unknown566	0.000171384	0.00117234	24	9	15563.4	0.0159449	0.240485	20	6	149231	3.77e-05	0.000344023	22	7.425	55540.9	65981.1	1.18797	12527	14060	17449	11836	125708	167673	165603	137939	15971	30879	33552	17255	12710	11662	12824	12406	50003.4
3823	unknown567	8.77e-05	0.000728787	24	9	476.944	0.0205093	0.240485	20	6	7667.75	2.56e-05	0.000256488	22	7.425	2439.25	3553.75	1.4569	195	210	300	159	6671	10431	6699	6870	240	625	842	310	176	144	212	172	2141
3824	unknown568	0.0499351	0.10099	24	6	554.018	0.267216	0.636844	27.8233	6	4103.5	0.0709434	0.149627	25.9117	6.03284	3469.79	634.391	0.182832	3162	5073	3205	4004	3209	3477	5422	4306	3762	3912	3607	3209	2259	2538	2526	2505	3511
3832	unknown575	0.00980952	0.0273153	18	15	1640.66	0.865032	1	20	12	10357.8	0.0489565	0.110407	19	13.6167	8424.78	2643.11	0.31373	7431	9143	10335	9275	5486	4147	10389	7141	11419	10633	8985	10394	6399	7374	7616	8220	8399.19
3833	unknown576	0.0299489	0.0655606	24	0	1158.24	0.380691	0.80058	24.8451	6.63e-05	9324.24	0.062411	0.134247	24.4225	3.26e-05	8103.6	1347.6	0.166297	7843	9773	9735	9946	7825	5796	9481	6706	6641	7375	7739	6879	7728	7780	8198	9928	8085.81
3841	unknown583	0.00421867	0.0142044	24	9	11819.3	0.109643	0.37615	24.2975	6	69159.2	0.00401435	0.0141779	24.1488	7.50953	59010.7	13045.8	0.221074	48803	59645	57537	47758	62854	67690	80639	65454	56427	64234	79513	65858	57043	51674	39648	40723	59093.8
3856	unknown597	8.77e-05	0.000728787	18	15	695.44	0.31691	0.71075	20	12	4347	0.000319329	0.00183138	19	13.6167	3768.09	997.013	0.264593	3778	4432	4356	3956	2915	2531	3687	2567	4132	4421	4204	4631	3331	3737	3693	3764	3758.44
3868	unknown607	8.77e-05	0.000728787	18	15	13004.8	0.192145	0.51818	20	12	71524	0.000202042	0.00128088	19	13.6167	61931.8	16709.2	0.2698	62557	71258	72022	66354	48112	42426	53767	46000	70911	71737	68825	74623	55461	59070	64935	60262	61770
3870	unknown609	0.00164724	0.00683195	24	9	4919.34	0.156964	0.461409	23.9024	5.99999	20670.5	0.00239435	0.00922223	23.9512	7.49697	15289.5	5827.42	0.381138	12841	13373	12795	12528	22770	17811	14977	27124	24531	14968	19458	11004	12053	11862	8359	7984	15277.4
3871	unknown61	0.00164724	0.00683195	18	0	1817.62	0.137807	0.427438	20	17.9999	7416.25	0.00213167	0.00841396	19	18.05	6586.83	1412.59	0.214457	8576	9289	8096	7484	5100	4514	5270	4270	5788	8486	7380	6382	8236	7899	6745	6785	6893.75
3887	unknown624	4.22e-05	0.000430754	18	9	9569.28	0.039621	0.252293	23.7736	6	19985.5	2.39e-05	0.000245247	20.8868	7.85741	12740.4	9004.91	0.706799	4111	3123	5791	2234	20080	24573	18721	16568	11166	16819	24036	11397	8996	6022	6574	4134	11521.6
3889	unknown626	1.91e-05	0.000238238	18	15	5856.61	0.09725	0.356631	20	12	43576.2	2.64e-05	0.00026359	19	13.6167	37931.8	7913.83	0.208633	37386	40046	40574	37875	32106	29085	36262	29430	42852	44526	43678	43249	34768	36558	39681	37607	37855.2
3893	unknown63	0.00267199	0.0100694	18	9	4111.12	0.0269006	0.240485	20	5.99998	11276.2	0.000757636	0.00369184	19	7.59999	5101.09	4975.6	0.975399	1122	897	1216	901	9972	9615	14634	10884	2349	3784	2470	1579	3358	1635	659	893	4123
3896	unknown632	0.0419656	0.0850707	18	12	607.758	0.423716	0.855333	24.4321	12	8919.25	0.0894337	0.180451	21.2161	12.2822	7669.73	1958.78	0.255391	5713	8268	7104	6089	8375	7718	7647	10356	11080	8120	10544	5933	7184	6864	4513	4928	7527.25
3904	unknown64	0.00267199	0.0100694	18	9	7613.42	0.0279163	0.240485	20	5.99999	19945.8	0.000783477	0.00379045	19	7.59999	8941.34	8839.5	0.988611	1706	1587	2105	1565	16940	17478	26321	19044	3999	6675	4146	2582	5824	2735	1080	1472	7203.69
3914	unknown649	4.22e-05	0.000430754	18	9	4671.15	0.0267356	0.240485	20	6.00002	11697	1.66e-05	0.000186075	19	7.60001	5081.64	5533.16	1.08885	766	657	946	490	15580	10934	12857	7417	2839	3397	2668	1864	1157	899	817	615	3993.94
3915	unknown65	0.0419656	0.0850707	18	12	776.757	0.840583	1	26.0177	12	5775	0.153257	0.280001	22.0088	12.4118	4942.51	1256.38	0.254199	4031	4920	5564	4952	4003	3745	7788	4944	6113	6305	5434	5248	3709	3629	3380	4267	4877
3927	unknown660	0.00980952	0.0273153	24	9	5074.55	0.128813	0.409516	23.1496	5.99999	18276.8	0.00969657	0.0290561	23.5748	7.47537	12854.5	5480.75	0.426368	11009	10886	9119	10395	20675	16347	13024	23061	19622	13061	16388	8155	10778	10431	5936	5195	12755.1
3937	unknown67	0.00267199	0.0100694	18	0	2155.79	0.11338	0.380569	26.8085	17.9999	7595	0.00275743	0.0103733	22.4043	18.7235	7678.87	1964.06	0.255774	11091	12028	10718	8603	6327	6778	6267	5845	6722	7217	7663	5363	7657	8604	7408	6711	7812.62
3940	unknown672	0.0144977	0.0373217	24	6	4591.95	0.155295	0.459053	26.6465	6	20151.5	0.0159765	0.0440908	25.3233	6.01643	16042.9	3480.45	0.216947	19728	20822	15558	16484	23338	18198	16132	22938	20265	13756	19267	9517	12385	12278	9459	9040	16197.8
3948	unknown68	0.00164724	0.00683195	18	0	1428	0.467218	0.909238	26.9725	12	4375.25	0.00628751	0.0204085	22.4862	5.00204	4398.58	1823.78	0.414628	6725	6211	5761	4994	3467	3146	3322	3120	4341	4786	4905	3469	4194	4759	4275	3805	4455
3950	unknown681	0.0419656	0.0850707	18	12	787.01	0.334248	0.73504	24.4321	12	5254.75	0.0738766	0.154684	21.2161	12.2822	4352.56	1442.59	0.331434	3908	3965	3538	3195	5229	4547	4112	6359	5348	5286	7305	3080	4255	3551	2080	2204	4247.62
3962	unknown692	0.00980952	0.0273153	24	9	4208.7	0.330475	0.729708	24.9858	6	17454.8	0.0218226	0.0573025	24.4929	7.53324	13965.4	4684.89	0.335464	11847	14162	11906	13203	17666	13765	13588	24800	19577	15091	23603	9747	11701	9140	7411	7822	14064.3
3969	unknown699	0.0065055	0.0199214	18	15	997.197	0.0882348	0.337804	20	12	4029.75	0.00485777	0.0164329	19	13.6167	3289.1	1146.37	0.348535	2394	3611	3877	3668	2734	1226	2602	1981	3566	4193	4033	4327	3337	3594	3348	3957	3278
3971	unknown70	1.91e-05	0.000238238	24	9	2295.62	0.160376	0.465123	20	6.00002	9821.5	4.19e-05	0.000368334	22	7.42501	5256.02	3788.5	0.720793	2692	3716	3752	2634	5987	5787	17519	9993	6208	5492	3968	3053	2540	2542	1800	1326	4938.06
3973	unknown701	0.000572095	0.00298095	18	15	1170.62	0.0977635	0.357427	20	12	4831.25	0.000603563	0.00305307	19	13.6167	3928.27	1305.61	0.332362	2692	4460	4444	4451	3312	2119	3038	2452	5093	4809	4917	4506	3938	3663	4285	4471	3915.62
4012	unknown737	0.0419656	0.0850707	18	0	528.562	0.141377	0.435182	28	18	1117	0.0363528	0.0867737	23	18.8928	1275.08	408.621	0.320466	1873	2339	1708	1969	1096	866	686	1260	1218	1009	1056	1129	955	1176	1217	1120	1292.31
4015	unknown74	8.77e-05	0.000728787	18	9	37066.9	0.0393127	0.251492	20	6	87548.8	4.68e-05	0.000401419	19	7.6	44611.2	37538.1	0.841452	12632	15146	16050	13021	75882	70843	132228	71242	31513	32477	34713	27113	14030	18595	15111	15116	37232
4027	unknown750	0.0210199	0.0497627	18	15	891.662	0.872536	1	20	12	3500.5	0.091678	0.184242	19	13.6167	3049.52	1002.19	0.328639	3569	4155	3514	3457	2408	2041	1827	2435	3324	3340	4760	2578	3266	3152	2202	2609	3039.81
4040	unknown762	0.0419656	0.0850707	24	3	742.639	0.19183	0.518168	28	6.63e-05	6665.99	0.046869	0.106308	26	1.62503	5454.26	52.0395	0.00954107	6868	8013	5668	6115	5480	5301	5266	5874	5110	5484	5560	4248	4710	5182	4041	4364	5455.25
4055	unknown776	8.77e-05	0.000728787	24	3	2384.54	0.0321009	0.242989	28	6.63e-05	15109.7	3.88e-05	0.00034993	26	1.62503	10841.9	2296.47	0.211815	14269	16861	16764	12545	11057	11642	9429	9989	8206	8298	9773	7398	8682	9034	9548	9279	10798.4
4067	unknown787	7.77e-06	0.000118884	18	9	20629.5	0.0251894	0.240485	20	6	59868.8	3.22e-06	5.55e-05	19	7.6	34662.2	25621	0.739164	9961	11128	10700	11603	67753	65393	46073	60256	25690	37124	36963	27477	20856	19594	10664	12775	29625.6
4075	unknown794	0.000987235	0.00453311	18	9	4763.07	0.0305297	0.240485	20	6.00001	15449.5	0.000343887	0.00194644	19	7.60001	8900.12	5564.22	0.625185	3908	4925	3801	4719	17713	18025	11558	14502	4631	7553	8593	5746	5407	5308	3691	4821	7806.31
4078	unknown797	0.0065055	0.0199214	24	9	1608.49	0.281548	0.657552	23.52	6	7549	0.0133754	0.0377792	23.76	7.48561	5566.6	1760.35	0.316235	4881	6650	4550	4639	8730	7071	4936	9459	7669	5056	7506	2889	4543	4416	2978	2804	5548.56
4079	unknown798	0.0419656	0.0850707	24	3	512.652	0.096675	0.355163	28	6.63e-05	4819.74	0.0264003	0.0668108	26	1.62503	3609.74	7.38903	0.00204697	4419	5486	4847	4527	3452	3153	3061	3424	3031	3376	3751	2877	3029	3247	3093	2985	3609.88
4083	unknown800	0.0065055	0.0199214	24	6	1438.96	0.161693	0.467689	26.6465	6	19168.2	0.0082649	0.0255622	25.3233	6.01643	17558.3	1471.01	0.0837788	17697	19088	18496	17910	20895	19386	18182	18210	15876	17467	20119	16933	16174	17129	14251	14168	17623.8
4091	unknown808	0.0299489	0.0655606	18	12	1684.33	0.509315	0.957424	26.4865	12	31833.5	0.0790578	0.163321	22.2432	12.4532	29412.1	4001.87	0.136062	26560	32006	31495	27337	29987	28432	36331	27073	31066	31798	33206	31264	25982	27140	23721	24254	29228.2
4092	unknown809	0.0299489	0.0655606	18	12	1905.3	0.717913	1	27.1385	12	30242.2	0.104056	0.203967	22.5692	12.5129	27913.8	3630.8	0.130072	24854	31020	30166	26730	27246	25683	33573	26919	30657	29646	30884	29782	24086	25662	23262	24286	27778.5
4096	unknown812	0.0144977	0.0373217	18	15	1460.88	0.442076	0.877472	20	12	16998.8	0.0387753	0.0912211	19	13.6167	15441.3	2088.34	0.135244	15297	16609	16339	14382	14443	13125	16105	11943	16085	16882	18169	16859	15605	15572	14214	15109	15421.1
4099	unknown815	0.0144977	0.0373217	24	9	509.824	0.361367	0.774229	25.1282	6	5733.5	0.0327522	0.079897	24.5641	7.53842	5365.88	493.735	0.0920137	5147	5696	5419	4789	6107	5973	6034	4820	5178	5710	6023	5848	5057	5257	4535	4452	5377.81
4117	unknown831	0.000572095	0.00298095	24	6	555.079	0.0343485	0.244995	22.7907	6.00002	2998.5	0.000232612	0.0014186	23.3953	6.00402	2262.6	655.994	0.28993	2221	2573	2247	2188	3331	2821	2675	3167	2309	1969	2585	1508	1863	1642	1450	1448	2249.81
4122	unknown836	0.0419656	0.0850707	24	9	5477.25	0.0937659	0.349103	23.7736	12	23030.2	0.0257261	0.0655645	23.8868	10.5073	18592.3	5426.8	0.291885	14352	16704	16444	14107	23468	23145	24179	13990	22129	25911	23077	21004	16326	17066	13247	11907	18566
4125	unknown839	0.00421867	0.0142044	24	6	483.661	0.0878703	0.337304	21.7778	6	3314.75	0.00329924	0.0120758	22.8889	6.01417	2639.75	642.198	0.24328	2608	2693	2691	2278	3709	2992	3116	3442	3235	2439	2291	2072	2008	2646	1874	1779	2617.06
4129	unknown842	0.000320124	0.00187824	24	6	732.563	0.0229533	0.240485	22.1053	6	4396.5	9.42e-05	0.000711627	23.0526	6.01015	3296.3	1030.25	0.312547	3198	3604	3198	2918	5004	4215	4116	4251	3436	3232	3082	2558	2378	2915	2083	2054	3265.12
4130	unknown843	0.000320124	0.00187824	24	9	2075	0.106008	0.371371	20	6	26649.8	0.000383171	0.00212437	22	7.425	8983.61	11983.7	1.33395	1987	1912	1115	2042	36171	44664	7306	18458	1636	1158	3758	3241	796	1047	1060	1295	7977.88
4132	unknown845	0.00164724	0.00683195	18	0	1613.62	0.301873	0.689768	26.0177	17.9999	5538.5	0.0042796	0.0149321	22.0088	18.6177	5411.92	1290.98	0.238543	7034	7850	7086	6637	4531	4570	3817	3926	4358	5565	5990	4841	6187	6744	4699	4524	5522.44
4136	unknown849	0.00980952	0.0273153	24	6	1358.71	0.114127	0.382438	28	6.63e-05	11566	0.00872658	0.026674	26	3.25003	10452.7	776.47	0.0742838	11487	12534	11085	11158	12768	11219	10632	11622	11044	11413	11059	8533	8834	9789	7520	6749	10465.4
4138	unknown850	0.000987235	0.00453311	24	3	533.159	0.0475571	0.268862	28	6.63e-05	5285.49	0.000514874	0.00270231	26	1.62503	3658.03	417.397	0.114104	4801	6320	4923	5098	3437	3289	3175	3176	3164	2862	3355	2516	2963	3167	3105	3051	3650.12
4142	unknown854	0.00164724	0.00683195	18	0	1266.96	0.372942	0.790813	28	12	3607.75	0.00515726	0.0172706	23	4.92857	3842.54	1762.25	0.458616	5340	7279	4795	4890	2796	2567	2769	3378	3631	3698	4052	3050	3762	3773	3161	3121	3878.88
4149	unknown860	0.0299489	0.0655606	18	12	273.65	0.744503	1	26.3284	6	4988.75	0.1071	0.208517	22.1642	9.91357	4377.46	648.513	0.148148	3801	4433	5923	3599	3785	3875	7670	4625	4443	4719	4848	4426	3544	3343	3640	2507	4323.81
4150	unknown861	0.0419656	0.0850707	18	12	574.878	0.704304	1	26.1721	6	10280.8	0.133638	0.250717	22.0861	9.89365	8984.45	1363.96	0.151814	7844	9452	11440	7521	8073	7782	15945	9323	9029	10333	9662	8818	7114	7127	7269	5135	8866.69
4151	unknown862	0.0210199	0.0497627	18	12	397.924	0.758419	1	26.1721	6.00001	6277.75	0.0819222	0.167956	22.0861	9.89365	5510.41	853.905	0.154962	4739	5635	7251	4548	4790	4733	9837	5751	5672	6355	5904	5455	4309	4363	4494	3151	5436.69
4162	unknown872	0.0419656	0.0850707	18	0	1192.18	0.366873	0.782729	28	12	6139.75	0.0796536	0.164246	23	4.92857	6482.77	1796.5	0.27712	8628	9919	7761	7134	5474	5637	5655	5402	6052	6538	6098	5871	5757	7578	5519	5294	6519.81
4170	unknown88	0.00980952	0.0273153	18	0	28254.9	0.412994	0.843123	20	12	89933.2	0.0263686	0.0668087	19	15.2	75973.1	44019.6	0.579411	73832	114851	131746	123631	46958	20577	60482	29033	63452	98092	100665	97524	67035	74301	80264	104515	80434.9
4174	unknown883	7.77e-06	0.000118884	18	0	5262.64	0.0367426	0.247281	25.7143	17.9999	11662.7	4.59e-06	7.17e-05	21.8571	18.5785	10585.4	4754.06	0.449115	16103	20244	14076	17274	7128	7576	8468	6226	8087	7885	7726	8949	11427	11226	11746	12252	11024.6
4176	unknown885	0.00164724	0.00683195	18	0	391.737	0.489871	0.935446	25.5652	17.9999	3114.75	0.00655414	0.0210843	21.7826	18.5596	3024.56	483.869	0.15998	4192	4186	2803	3446	2637	2328	2609	2758	2842	2899	3179	2796	3442	3313	2926	2778	3070.88
4184	unknown892	0.00267199	0.0100694	24	0	1568.36	0.0694906	0.305476	26.3284	6.63e-05	11124.2	0.00178093	0.00731289	25.1642	3.17e-05	8523.94	2163.27	0.253788	11735	12459	9104	11199	8475	6576	7052	7157	7531	6627	7446	6522	7870	7179	9199	9100	8451.94
4193	unknown90	0.000987235	0.00453311	24	9	774.282	0.0360457	0.247108	20.6557	6	6136.75	0.000400109	0.00219578	22.3279	7.42933	4806.45	995.193	0.207054	4035	5025	4610	4212	6064	6174	7026	5283	5065	4332	4693	4008	4252	3871	3761	3370	4736.31
4203	unknown909	0.0210199	0.0497627	24	0	3151.57	0.356477	0.766407	24.8451	6.63e-05	14162.7	0.0441626	0.100963	24.4225	3.26e-05	9528.07	4883.21	0.512508	16065	21938	14408	4240	6815	10119	8570	7742	7558	6841	3378	3972	6998	11285	12223	9266	9463.62
4204	unknown91	0.000987235	0.00453311	24	6	1052.53	0.0513933	0.275803	21.1511	6	9980.75	0.000552471	0.00285465	22.5755	6.02398	8044.64	1908.35	0.23722	7043	8522	8050	6883	9748	9847	11690	8638	8384	7773	7900	6745	7253	6625	5959	6283	7958.94
4217	unknown921	0.0419656	0.0850707	18	15	8203.85	0.133037	0.416523	20	12	31779.8	0.0345477	0.0832452	19	13.6167	28637.4	8388.77	0.292931	34006	30989	32792	34479	22506	22841	15423	14533	29891	35046	34897	27285	33732	34687	29427	24364	28556.1
4236	unknown939	0.0299489	0.0655606	18	0	916.764	0.575507	1	26.0177	17.9999	3342.5	0.0872264	0.176904	22.0088	18.6177	3329.52	766.358	0.230171	5142	4655	4205	3555	3074	2642	2124	2269	3051	3645	3692	2898	3624	3985	2866	2895	3395.12
4241	unknown943	0.0419656	0.0850707	24	18	412.243	0.263759	0.633782	25.5652	17.9999	5545.25	0.0609184	0.131632	24.7826	18.0179	4939.33	515.3	0.104326	5089	4625	4944	4525	4595	4964	4551	3575	4395	5203	5426	4762	5701	6194	5107	5179	4927.19
4243	unknown945	0.0299489	0.0655606	18	15	436.992	0.996215	1	20	12	4398	0.13462	0.252012	19	13.6167	3914.6	688.072	0.175771	3933	4230	4659	3910	3035	2970	4532	3720	4606	4466	4517	4003	3436	3908	3350	3252	3907.94
4244	unknown946	0.0419656	0.0850707	24	18	1328.3	0.32319	0.718015	26.1721	18	15734.5	0.0718888	0.151106	25.0861	18.0338	14056.4	1242.55	0.0883976	14328	12751	14276	12144	13857	13551	13143	10143	12409	15601	15032	14099	16357	17377	14158	15046	14017
4245	unknown947	0.0210199	0.0497627	18	15	478.358	0.994205	1	20	12	3702.5	0.101734	0.199777	19	13.6167	3185.65	731.634	0.229666	3196	3378	4167	3150	2366	2380	3644	2899	4034	3732	3867	3177	2629	3027	2559	2652	3178.56
4246	unknown948	0.00164724	0.00683195	24	18	1675.14	0.0291326	0.240485	20	17.9999	14116.2	0.000525212	0.00274326	22	18.15	12217.5	2097.93	0.171715	13817	12266	14036	11785	9411	9076	10251	9102	11659	14078	13957	12279	14180	14994	13191	14100	12386.4
4253	unknown954	0.0144977	0.0373217	18	0	2463.91	0.719091	1	27.8233	12	8215	0.0580008	0.126712	22.9117	4.94081	8500.7	3087.62	0.36322	12872	13073	9845	9442	7588	6986	6388	5913	7603	8368	11530	5359	8479	9248	7425	6999	8569.88
4256	unknown957	0.0065055	0.0199214	24	9	874.161	0.147076	0.441698	21.253	5.99999	7373.25	0.0076084	0.0237694	22.6265	7.43634	6136.92	973.339	0.158604	5190	6736	5965	5406	6720	6611	9078	7084	6894	5209	6229	5576	5165	5464	4754	5205	6080.38
4268	unknown968	0.0144977	0.0373217	18	0	752.008	0.768476	1	20	12	4218.5	0.0612441	0.132131	19	15.2	3785.82	995.18	0.262871	4596	4895	4742	4363	2970	2639	3243	3129	4352	4517	4328	3677	3721	4700	2985	3330	3886.69
4269	unknown969	0.0299489	0.0655606	18	0	1517.63	0.817909	1	20	12	7396.75	0.115356	0.222003	19	15.2	6995.87	1788.29	0.25562	8117	10059	8453	8566	5985	4949	5119	6453	6616	8118	8906	5947	7110	7926	6134	6376	7177.12
4271	unknown970	0.0299489	0.0655606	18	15	930.376	0.146639	0.441547	20	12	3809	0.0282299	0.0702098	19	13.6167	3361.21	1092.92	0.325157	3561	4007	4460	3717	1992	1629	2915	2171	3994	3921	3823	3498	3150	3836	3106	3830	3350.62
4272	unknown971	0.000987235	0.00453311	18	0	1710.49	0.172377	0.488798	20	12	7602	0.00164709	0.00688406	19	15.2	6893.76	2477.46	0.359377	8553	8630	9618	8239	4147	3564	6045	5363	7966	7903	7638	6901	7202	7859	6359	8331	7144.88
4275	unknown974	0.0065055	0.0199214	18	0	1555.28	0.655172	1	28	12	7024.75	0.0275253	0.0688132	23	4.92858	6835.69	2309.88	0.337915	8484	9257	9002	8044	5879	5015	5628	5080	6545	7360	7171	7023	5873	7256	6130	6386	6883.31
4285	unknown983	0.000320124	0.00187824	18	9	5960.2	0.0308754	0.240485	20	6.00001	17593.8	0.000123793	0.000887881	19	7.60001	9297.32	6920.33	0.744336	2530	2294	3704	4463	16178	16746	15669	21782	4081	7068	6393	7025	6634	4196	2774	5454	7936.94
4287	unknown985	0.0210199	0.0497627	24	21	12784.1	0.106155	0.371371	22.4427	17.9999	62415.2	0.0158541	0.0438367	23.2214	19.4716	52584.5	12787.2	0.243174	61495	63116	53256	65380	44517	47662	30306	36770	37257	42045	64169	52781	67227	59271	59956	63207	53025.9
4288	unknown986	0.00421867	0.0142044	24	21	1667.18	0.0914616	0.344627	20.5594	17.9999	8730.74	0.00341862	0.0124288	22.2797	19.5004	7060.4	1581.4	0.223981	8068	7634	7182	8457	5279	6084	3598	4377	5239	6541	9951	7630	9061	8361	8310	9191	7185.19
4290	unknown988	0.0065055	0.0199214	18	15	408.354	0.128067	0.408043	20	12	4215.75	0.00674035	0.0215711	19	13.6167	3812.94	555.775	0.14576	3876	3768	3915	3713	3507	3313	3537	2897	4057	4195	4431	4180	4128	4344	3456	3604	3807.56
4293	unknown990	0.00344533	0.0129499	24	18	712.057	0.0190189	0.240485	20	17.9999	5313.25	0.000696748	0.00343685	22	18.15	4493.44	920.933	0.204951	4928	4751	4581	4997	3436	3417	3100	2976	4398	4939	5431	4874	5095	5931	4928	5299	4567.56
[truncated: 7 more rows]

## Sheet: unique cycling TM in AM
ID	CycID	JTK_pvalue	JTK_BH.Q	JTK_period	JTK_adjphase	JTK_amplitude	LS_pvalue	LS_BH.Q	LS_period	LS_adjphase	LS_amplitude	meta2d_pvalue	meta2d_BH.Q	meta2d_period	meta2d_phase	meta2d_Base	meta2d_AMP	meta2d_rAMP	X0	X0.1	X0.2	X0.3	X6	X6.1	X6.2	X6.3	X12	X12.1	X12.2	X12.3	X18	X18.1	X18.2	X18.3	AM
[truncated: 872 more rows]

[truncated: 5 more sheets: shared cycling in AM and TM, 0.5 cycling in AM, 0.5 cycling in TM, total AM, total TM]
