# Supplementary material for: The microbiome interacts with the circadian clock and dietary composition to regulate metabolite cycling in the Drosophila gut
Source: eLife journal article supplement (doi:10.7554/elife.97130), 2024-05-01
Supplement: supp1 [file Table15-Per01-Biogenic amines-AM versus AS.xlsx]

## Sheet: unique cycling in perAM
CycID	JTK_pvalue	JTK_BH.Q	JTK_period	JTK_adjphase	JTK_amplitude	LS_pvalue	LS_BH.Q	LS_period	LS_adjphase	LS_amplitude	meta2d_pvalue	meta2d_BH.Q	meta2d_period	meta2d_phase	meta2d_Base	meta2d_AMP	meta2d_rAMP	0	0.1	0.2	0.3	6	6.1	6.2	6.3	12	12.1	12.2	12.3	18	18.1	18.2	18.3	PerM
unknown284	8.77e-05	0.0388464	24	15	13769	0.0429871	1	23.1496	12	32584.8	5.08e-05	0.0245925	23.5748	13.4773	19559.3	14130.5	0.722443	7254	10897	4577	7464	14657	9094	8717	19956	34745	42636	20268	32690	32280	16576	21131	28362	19456.5
Pro-Asn	0.000171384	0.0388464	24	15	1870.65	0.0334358	1	23.7736	12	7911.5	7.49e-05	0.0245925	23.8868	13.4932	6029.68	2008.06	0.333029	4545	5037	3394	3811	5185	6112	3849	5386	8901	8897	6627	7221	7186	7303	6044	6913	6025.69
Pro-Ser	0.000171384	0.0388464	24	15	13651	0.0306998	1	23.3952	12	49821.2	6.92e-05	0.0245925	23.6976	13.4831	35050.9	15807	0.450972	12011	29905	13531	28730	31196	22518	30676	26241	59464	50040	39998	49783	42475	38348	41765	42810	34968.2
unknown1899	0.000171384	0.0388464	24	15	1734.89	0.0855651	1	21.5648	12	7779.25	0.000177882	0.0245925	22.7824	13.4583	5064.4	3232.93	0.638364	4237	3626	2107	1863	4645	4095	2842	4717	8130	11071	5337	6579	4821	5806	4242	5930	5003
unknown395	0.000171384	0.0388464	24	18	1455.23	0.0532326	1	21.8859	12	14426.8	0.000114995	0.0245925	22.9429	14.8934	13237.6	2013.92	0.152136	12448	13077	11701	12641	11053	12246	11140	12438	16433	14211	13897	13166	14275	14127	14696	14321	13241.9
Gly-Pro	0.000320124	0.0388464	24	15	1638.19	0.0303897	1	25.1282	12	7510.25	0.000121999	0.0245925	24.5641	13.5416	5851.16	1666.77	0.284861	3035	5253	3272	4567	5143	4816	5049	5186	8965	7669	6085	7322	6414	6897	7206	7015	5868.38
Val-Lys	0.000320124	0.0388464	24	15	7134.35	0.0478214	1	21.995	12	28579.8	0.000185038	0.0245925	22.9975	13.4602	20296.2	9802.32	0.482963	14371	15823	11721	12125	17306	14690	13064	24835	28948	33909	23660	27802	22202	18134	18772	24851	20138.3
unknown1589	0.000320124	0.0388464	24	6	2494.5	0.0429577	1	24.9858	6	5635	0.000167694	0.0245925	24.4929	6.00243	3671.66	963.171	0.262326	8224	5650	4287	3037	5714	6324	5578	4924	2388	2053	2844	1842	912	2346	1589	1286	3687.38
unknown1695	0.000320124	0.0388464	24	15	1509.85	0.0515823	1	24.7059	12	5721.75	0.000198341	0.025099	24.3529	13.5246	4261.56	1545.5	0.36266	2453	3536	2450	2433	3565	3406	3171	4509	7614	5673	4615	4985	4505	4930	4705	5793	4271.44
unknown765	0.000320124	0.0388464	24	15	867.62	0.0607144	1	27.4766	12	4328.25	0.000230287	0.0257092	25.7383	13.6636	3478.88	903.612	0.259742	1362	1650	3359	2840	3463	3970	3105	2824	4356	4349	4128	4480	3610	4507	4027	4109	3508.69
Glutamine	0.000572095	0.0469622	24	15	70952.9	0.0605808	1	24.8451	12	496027	0.000390594	0.0340672	24.4225	13.53	421180	80198.2	0.190413	363596	392091	290256	318679	371818	392897	370885	437871	546228	553009	420410	464460	455263	466715	419918	484640	421796
unknown1283	0.000572095	0.0469622	24	15	1332.9	0.0984672	1	20.9501	12	4198.75	0.000607504	0.0459607	22.4751	13.4602	2386.49	2139.89	0.896668	1390	1032	787	1329	1391	1130	1238	1924	5977	4890	2492	3436	4301	1424	1599	3069	2338.06
unknown1458	0.000572095	0.0469622	24	15	1271.91	0.0209515	1	28	17.9999	4224.25	0.000147811	0.0245925	26	16.4821	3352.26	97.9318	0.0292136	2386	2151	1551	1992	2693	3272	2351	3494	4991	3791	3668	4366	4184	4295	4211	4207	3350.19
unknown851	0.000572095	0.0469622	24	15	1428.36	0.0186354	1	24.9858	12	4622	0.00013272	0.0245925	24.4929	13.5357	3419.51	1117.91	0.32692	1760	2395	1611	2679	2982	2675	2413	2495	4489	5539	3942	4518	4080	5042	4020	4233	3429.56
4-Methyl-2-oxovaleric Acid	0.000987235	0.0672042	24	6	10289.1	0.0551066	1	28	6.63e-05	25525.2	0.000588593	0.0459607	26	3.25003	17426.8	5703.63	0.327291	33594	33288	20414	14805	23793	23301	18382	29554	13010	16915	12657	13995	5843	5795	6288	8679	17519.6
Thr-Glu	0.000987235	0.0672042	24	15	17917.7	0.0601516	1	22.7907	12	69009.2	0.000637276	0.0459607	23.3953	13.4702	50955.5	19166.9	0.37615	33540	49410	28000	29308	37322	44873	32613	44899	80054	85057	58882	52044	59000	67455	51762	57950	50760.6
unknown1641	0.000987235	0.0672042	24	15	2348.83	0.0542317	1	23.2718	12	6657	0.000580104	0.0459607	23.6359	13.4801	4132.02	2925.34	0.707969	2540	1699	734	2173	4075	2114	2171	5106	5839	7700	5501	7588	6518	2834	3917	5310	4113.69
unknown193	0.000987235	0.0672042	24	15	2157.74	0.0606676	1	24.9858	12	12328	0.000642232	0.0459607	24.4929	13.5357	10124	2429.92	0.240015	8539	8417	7188	6671	8544	10190	7998	11266	13151	14094	9824	12243	10938	11527	10314	11430	10145.9
Gly-Pro-Arg	0.00164724	0.0718352	24	9	2290.67	0.0761468	1	24.8451	5.99998	15523.8	0.00125228	0.0685318	24.4225	7.5282	13300.6	2448.93	0.184121	14441	13546	9991	13198	15176	16826	13715	16378	16105	12720	15008	13701	11512	10540	9965	10697	13344.9
Ile-His	0.00164724	0.0718352	24	15	5534.35	0.0549904	1	23.7736	12	21291	0.000933837	0.0606126	23.8868	13.4932	16111.9	5398.96	0.335092	10806	12791	8936	11601	14635	14409	10039	14436	19034	25310	20738	20082	20460	23658	13036	17647	16101.1
Thr-Pro	0.00164724	0.0718352	24	15	21303	0.0943395	1	22.5575	12	118229	0.00151818	0.0743376	23.2788	13.4665	88089.1	36506.3	0.414424	79018	59034	53072	56619	79823	72687	65019	108764	135892	142761	91518	102744	86816	77371	91337	99951	87651.6
Val-His	0.00164724	0.0718352	24	15	5299.41	0.0907731	1	21.7778	12	26762	0.00146655	0.0743376	22.8889	13.4589	19430.9	8740.86	0.449843	14179	15738	12163	12040	18738	17674	10016	21787	26779	34489	22480	23300	21567	20645	15154	21685	19277.1
unknown1071	0.00164724	0.0718352	24	15	4174.94	0.13121	1	26.0177	12	20160.8	0.00204023	0.0780039	25.0088	13.5826	16272.7	4536.96	0.278807	13189	11763	10472	10482	14029	17925	11979	20193	24579	20531	15225	20308	18670	19096	14219	19069	16358.1
unknown1115	0.00164724	0.0718352	24	6	2613.64	0.208091	1	28	6.63e-05	10280.2	0.0030776	0.0885523	26	3.25003	5783.9	1304.29	0.225504	17393	11843	5341	6544	7096	4662	6796	6567	4067	4801	4093	3263	2576	2883	1495	2783	5762.69
unknown1364	0.00164724	0.0718352	24	6	1978.31	0.129841	1	28	6.63e-05	8314.25	0.00202118	0.0780039	26	3.25003	6584.96	1247.79	0.189491	12277	8846	6614	5520	7799	8251	7493	8416	6057	6088	6210	5455	3557	4969	3861	4271	6605.25
unknown1530	0.00164724	0.0718352	24	3	52685.8	0.057389	1	28	6.63e-05	279190	0.000970534	0.0615627	26	1.62503	223412	40330	0.180519	323955	299731	244806	248267	239418	296940	212243	239720	171098	170151	201840	196544	173858	217698	174066	152038	222648
unknown1896	0.00164724	0.0718352	24	15	3586.62	0.0704941	1	23.9024	12	14775.8	0.00116828	0.0661253	23.9512	13.497	10687.2	4759.39	0.445337	8015	7485	5742	5253	9141	10464	6142	13182	15550	19002	11370	13181	11491	10705	11493	12713	10683.1
unknown197	0.00164724	0.0718352	24	6	5253.45	0.239309	1	28	6.63e-05	23354.9	0.00348419	0.0926131	26	3.25003	12485.3	4132.42	0.330983	33230	36512	10514	13164	15104	10674	14802	11426	5743	10156	9137	8090	5261	5304	3014	6558	12418.1
unknown435	0.00164724	0.0718352	24	3	1690.34	0.179157	1	28	5.39e-05	7397.99	0.00269386	0.0826214	26	1.62503	4509.18	1709.21	0.379051	9433	5176	11163	3820	4207	6465	3493	5358	2628	3179	2171	3044	1828	3411	3297	2956	4476.81
Arg-Pro	0.00267199	0.0793355	24	15	938.684	0.0708223	1	23.2718	12	4372.5	0.00181147	0.0744021	23.6359	13.4801	3127.09	1501.05	0.480014	2313	2567	1253	1737	2876	2286	2284	4142	4871	4931	3544	4144	3200	2479	3503	3753	3117.69
Ketoisovaleric acid	0.00267199	0.0793355	24	6	930.906	0.122794	1	28	4.5e-05	2979.25	0.00296022	0.0869681	26	3.25002	1846.43	73.448	0.0397784	4678	3223	2523	1493	2095	2230	1707	2874	1326	1419	1172	1555	781	699	717	1070	1847.62
Val-Pro	0.00267199	0.0793355	24	15	21625.8	0.0934698	1	23.6461	12	80303	0.00232145	0.0812287	23.8231	13.4896	54545.6	31303.8	0.573902	33308	34300	22715	28644	51529	37049	31863	83454	96813	92706	57982	73711	65098	47256	51500	63252	54448.8
unknown1073	0.00267199	0.0793355	24	6	1537.78	0.102764	1	22.2166	6	7545.25	0.00252625	0.0819857	23.1083	6.00895	5760.7	1365.35	0.237011	6675	6817	5599	5503	7147	8866	7692	6476	3691	3805	6754	5519	2876	5054	5276	3798	5721.75
unknown1090	0.00267199	0.0793355	24	3	1877.72	0.0730817	1	28	4.34e-05	6580.49	0.00186313	0.0753623	26	1.62502	3430.42	1560.05	0.45477	8849	5524	9086	2863	3872	4576	3176	3799	1806	1578	1450	1823	804	1909	1932	1367	3400.88
unknown1138	0.00267199	0.0793355	24	18	703.925	0.0706744	1	24.1644	17.9999	2868.75	0.00180808	0.0744021	24.0822	18.0002	2224.43	418.009	0.187918	1519	1886	1635	2481	1472	1533	1489	1845	2936	2164	2491	2647	2305	2444	3510	3216	2223.31
unknown1292	0.00267199	0.0793355	24	15	2735.09	0.108427	1	25.5652	12	11074.5	0.00264991	0.0826214	24.7826	13.5609	8555.19	2812.5	0.328747	6694	6129	4731	4987	7272	8654	5977	10200	13248	11962	7837	11251	11400	10603	7001	9588	8595.88
unknown1313	0.00267199	0.0793355	24	6	2077.83	0.0707935	1	28	6.63e-05	6507.75	0.00181081	0.0744021	26	3.25003	4922.26	1598.17	0.324682	9030	6699	6495	3807	6527	7498	5211	6349	3606	4424	4704	3581	2322	3591	2451	2877	4948.25
unknown1349	0.00267199	0.0793355	24	3	3553.57	0.0480501	1	28	4.58e-05	9748.24	0.00127882	0.068638	26	1.62502	5062.54	3012.34	0.595025	14146	9039	11323	4485	5872	6212	4950	7711	2512	1601	1742	2414	1195	2643	2660	1583	5005.5
unknown1355	0.00267199	0.0793355	24	9	1642.26	0.043005	1	22.1053	6.00001	8797	0.00115729	0.0661253	23.0526	7.45095	6761.55	1732.97	0.256298	7590	5257	6608	5274	8728	9522	8734	8204	6485	5872	6461	8205	4749	5881	5360	4139	6691.81
unknown1391	0.00267199	0.0793355	24	15	15857.9	0.104187	1	25.2722	12	72990	0.0025574	0.0820425	24.6361	13.5478	57134.3	18593.7	0.325439	40066	46940	31107	38461	54083	46258	40707	80255	76651	76697	60298	78314	57566	54134	69225	66862	57351.5
unknown1413	0.00267199	0.0793355	24	15	849.766	0.0685954	1	26.6465	12	3422.5	0.00176037	0.0744021	25.3233	13.6156	2735.05	640.519	0.234189	1893	2073	1937	1645	2174	2913	1751	2723	3826	4086	2939	2839	2564	3605	3793	3255	2751
unknown199	0.00267199	0.0793355	18	15	622.077	0.5304	1	20	12	3921.25	0.0107129	0.165191	19	13.6167	3363.84	822.858	0.244618	3671	3505	3334	3749	2836	3338	2577	2260	4470	4080	4018	3117	3075	2901	3297	3466	3355.88
unknown2090	0.00267199	0.0793355	18	12	1238.85	0.47883	1	20	12	7279.5	0.00980216	0.160495	19	12.0333	5652.67	2042.54	0.361341	5763	4335	4756	5499	4765	4690	4507	8588	8882	8154	6475	5607	3398	4322	3106	3735	5411.38
unknown56	0.00267199	0.0793355	24	15	3723.62	0.102392	1	25.4179	12	11410.2	0.0025181	0.0819857	24.7089	13.5542	7285.43	5067.79	0.695607	1207	1103	5230	2220	5951	11987	3773	7859	13452	12486	9869	9834	4114	12151	6608	9782	7351.62
unknown734	0.00267199	0.0793355	24	15	2173.47	0.176651	1	21.8859	12	8645	0.0040869	0.0983972	22.9429	13.4595	5977.72	2963.28	0.49572	3944	4376	3286	3926	4819	6515	1562	4420	6807	13146	7220	7407	6912	8579	4612	7313	5927.75
unknown882	0.00267199	0.0793355	24	3	4427.37	0.11005	1	24.4321	4.16e-05	25624.7	0.00268522	0.0826214	24.2161	1.51352	19077.4	7769.89	0.407282	25978	25115	33510	17896	15865	24743	16896	20400	12463	10220	12827	15693	15438	17799	21519	18426	19049.2
unknown888	0.00267199	0.0793355	24	15	39147.4	0.138681	1	24.8451	12	126416	0.00329812	0.0893696	24.4225	13.53	86792.5	46404	0.534655	51141	55145	28111	39787	87892	51183	56511	128486	134282	157290	93568	120526	141773	68587	69563	110536	87148.8
Asp-Val	0.00421867	0.0989438	24	15	3273.73	0.0866269	1	23.9024	12	14558	0.00325776	0.0891413	23.9512	13.497	11265	3588.72	0.318574	8479	10741	6406	6439	10498	8644	8051	12457	16003	16903	12354	12972	11412	13426	10305	15100	11261.9
Gln-Ala	0.00421867	0.0989438	24	15	2118.85	0.104578	1	22.4427	12	11950	0.00384976	0.0982803	23.2214	13.4649	8895.95	3661.79	0.411625	7995	6353	5008	5655	7601	7217	6640	11084	13721	14560	9318	10201	8571	7919	9513	10226	8848.88
His-Leu	0.00421867	0.0989438	24	6	64722.5	0.127299	1	28	7.64e-05	266607	0.00458061	0.107433	26	3.25004	183689	162.012	0.000881991	393742	277859	203811	191016	240424	221790	185769	192185	140240	162339	180238	129607	102198	146493	66043	105312	183692
Maltotriose	0.00421867	0.0989438	24	3	4303.28	0.216223	1	28	5.15e-05	20202.5	0.00729709	0.133465	26	1.62502	13063.1	3819.7	0.292403	23627	14786	30323	12074	11217	16171	9624	19199	10146	9122	7389	9026	4699	10425	10946	9079	12990.8
unknown1023	0.00421867	0.0989438	24	15	4415.35	0.109344	1	24.8451	12	22623.2	0.00400466	0.0982803	24.4225	13.53	18290.2	4940.79	0.270133	15263	14545	12704	11899	14849	17486	13173	23876	26231	22832	18855	22575	20272	19878	17720	21093	18328.2
unknown1048	0.00421867	0.0989438	24	18	717.006	0.215492	1	23.1496	17.9999	7544.75	0.00727551	0.133465	23.5748	18.0058	6884.14	496.912	0.0721821	6743	7663	5938	6250	5748	6933	6376	5617	7768	6952	7108	6987	7034	7814	7194	8137	6891.38
unknown1419	0.00421867	0.0989438	24	12	2032.93	0.107148	1	23.6461	12	8446.25	0.00393341	0.0982803	23.8231	12.0007	6441.32	2624.92	0.407512	6402	4491	4069	3626	9675	7063	5246	7198	9041	9716	6603	8425	6255	4735	4419	5855	6426.19
unknown1462	0.00421867	0.0989438	24	6	642.937	0.156271	1	26.6465	5.99998	2068.75	0.0054879	0.11717	25.3233	6.01642	1534.28	292.718	0.190785	2735	1757	2246	1245	1552	2192	1496	3035	1277	1572	983	1148	673	1100	844	902	1547.31
unknown1511	0.00421867	0.0989438	24	6	1908.83	0.0335618	1	28	6.63e-05	5240.24	0.00139641	0.0721736	26	3.25003	3406	580.333	0.170385	6071	6396	4339	4155	4038	4606	3065	5567	3086	2890	1905	2488	1374	1539	1457	1671	3415.44
unknown168	0.00421867	0.0989438	24	15	4804.61	0.103372	1	20.9501	12	27789.5	0.00381043	0.0982803	22.4751	13.4602	21395.1	7567.13	0.353685	21728	18620	13183	14162	17396	17840	14980	22446	30521	33003	22293	25341	24372	20079	19520	24098	21223.9
unknown2172	0.00421867	0.0989438	24	3	4134.63	0.111969	1	21.253	4.33e-05	13381.5	0.0040896	0.0983972	22.6265	1.41418	9993.2	4324.61	0.432756	12361	17276	16097	7792	11431	14984	9646	14218	5822	6913	3919	4996	7910	11886	10683	6219	10134.6
unknown277	0.00421867	0.0989438	24	15	2170.82	0.0830154	1	23.3952	12	8012.25	0.00313686	0.0889358	23.6976	13.4831	5358.07	3155.42	0.588909	3374	3755	1870	2350	5119	3450	3217	7427	8650	10410	5831	7158	6838	4733	4865	6418	5341.56
unknown404	0.00421867	0.0989438	24	15	1049.7	0.131658	1	22.9091	12	7829.5	0.00471874	0.108597	23.4545	13.4724	6837.63	1043.33	0.152586	6385	6551	5533	5339	5555	7086	5498	6758	8173	8919	6594	7632	7126	7220	6974	7905	6828
unknown456	0.00421867	0.0989438	24	6	2856.36	0.0375815	1	27.4766	6.63e-05	8611.5	0.00154572	0.0743811	25.7383	3.21732	6182.33	2082.21	0.3368	11131	8736	7922	6657	8827	9064	7061	6944	3704	4135	4878	5213	2582	5721	3785	2973	6208.31
unknown468	0.00421867	0.0989438	24	6	74940.9	0.121126	1	28	5.57e-05	287752	0.00438386	0.103689	26	3.25003	203815	13336.1	0.0654324	419667	248762	262889	219689	227089	184561	285461	266381	192509	150776	165781	193785	105938	77679	79478	184071	204032
unknown478	0.00421867	0.0989438	24	15	8215.34	0.0714004	1	21.4599	12	59690.5	0.00274337	0.0832255	22.7299	13.4582	52538.1	7802.75	0.148516	53222	50864	42022	44030	46152	43135	42974	53773	62438	57013	59860	59451	58668	49898	55403	59253	52384.8
unknown771	0.00421867	0.0989438	24	3	160.867	0.115686	1	25.1282	7.44e-05	971.499	0.0042094	0.100414	24.5641	1.53529	768.781	221.066	0.287554	1035	943	1091	817	790	911	883	531	610	465	570	712	662	717	674	859	766.875
unknown846	0.00421867	0.0989438	24	6	1686.8	0.696061	1	28	6.63e-05	5423.74	0.0200576	0.21698	26	3.25003	3038.22	943.507	0.310546	2034	14165	3496	2000	6452	3387	2647	4343	1640	491	3238	1306	1053	581	1077	947	3053.56
Gly-Gly	0.0065055	0.11639	24	18	734.684	0.151453	1	23.1496	17.9999	6072	0.00780594	0.137384	23.5748	18.0058	5437.83	432.07	0.0794563	5488	5540	4593	4939	4518	5569	4371	4534	5521	6610	5638	5497	6539	6563	5582	5604	5444.12
Ile-Arg	0.0065055	0.11639	24	6	97554.9	0.107278	1	26.1721	6	578356	0.0057698	0.119285	25.0861	6.01127	475746	89923.4	0.189016	625637	560657	474605	410719	584246	620841	470500	637835	387048	514264	504419	470093	302280	439444	310924	350768	479018
Isomaltose	0.0065055	0.11639	24	3	1898.58	0.268696	1	28	4.64e-05	8040.74	0.0128465	0.176453	26	1.62502	5242.88	1894.58	0.361362	10641	5665	12116	3741	4894	7366	3967	7387	3299	3692	2919	3724	2061	4328	3794	3718	5207
Lactobionic acid	0.0065055	0.11639	24	6	16255.3	0.0261835	1	28	4.43e-05	40461	0.00164847	0.0744021	26	3.25002	22485.4	1082.54	0.0481441	51187	44806	37548	28303	21558	33181	24253	33575	19319	12497	14851	10230	5790	6272	7688	8990	22503
Ser-Ala	0.0065055	0.11639	24	3	1384.87	0.0474928	1	28	6.63e-05	5287.49	0.0028061	0.0842132	26	1.62503	3282.9	579.085	0.176394	7134	5295	4732	3989	3502	3995	3226	3144	2325	2514	2693	1930	1929	2584	1604	1755	3271.94
unknown1028	0.0065055	0.11639	24	6	1187.23	0.708338	1	28	6.63e-05	4049.75	0.0293993	0.267275	26	3.25003	2411.1	873.626	0.362334	1605	10210	2745	1639	4931	2831	1932	3495	1392	478	2261	1149	1432	621	1069	1015	2425.31
unknown1045	0.0065055	0.11639	24	3	2163.22	0.158053	1	28	5.65e-05	7417.74	0.00810224	0.137886	26	1.62503	4412.25	1838.31	0.416638	9095	4440	11943	4193	4069	5511	4160	7814	2636	2296	2111	3036	1048	3325	2382	1980	4377.44
unknown1149	0.0065055	0.11639	24	15	1561.11	0.780318	1	26.0177	12	4244.25	0.0318956	0.277818	25.0088	13.5826	2868.98	1802.4	0.628236	806	1351	1196	530	1122	8961	1498	1645	5230	5078	3349	3320	1815	5350	2017	3178	2902.88
unknown1187	0.0065055	0.11639	24	18	373.352	0.151912	1	22.5575	17.9999	3503.5	0.00782661	0.137384	23.2788	18.0173	3151.21	315.253	0.100042	3040	3489	2877	3056	2744	2750	2863	2664	3600	2769	3586	3096	3469	3219	3553	3773	3159.25
unknown1298	0.0065055	0.11639	24	3	10650.4	0.0547941	1	25.8651	6.63e-05	22825.2	0.00318652	0.0889358	24.9326	1.55832	12341.9	9618.2	0.779312	28994	22041	24996	15270	15429	29403	15781	7603	2089	3059	5248	3281	1862	11488	6140	2815	12218.7
unknown1489	0.0065055	0.11639	24	18	2237.29	0.120196	1	21.5648	17.9999	12466.5	0.0063757	0.127104	22.7824	18.0515	10622.7	1503.91	0.141574	8996	9171	9216	13449	7288	7785	7711	10136	12340	10785	13464	10848	11248	11803	13669	13146	10690.9
unknown1565	0.0065055	0.11639	18	12	2437.75	0.419591	1	20	12	20399.5	0.0188443	0.208708	19	12.0333	16449	4590.12	0.279052	15528	12775	15973	14190	16721	16961	15074	14545	17987	25168	18419	20024	9739	19744	12506	9154	15906.8
unknown1633	0.0065055	0.11639	24	15	868.681	0.102067	1	26.3284	12	4331.5	0.00552263	0.11717	25.1642	13.5985	3585.59	755.406	0.210678	2803	3572	2161	2209	2657	3108	3464	3997	4708	4351	3757	4510	4952	4038	3879	3467	3602.06
unknown1662	0.0065055	0.11639	24	15	4235.57	0.111543	1	23.2718	12	20480.8	0.00597093	0.122536	23.6359	13.4801	15758.9	5356.38	0.339896	13331	9214	11465	11352	16929	14562	10213	14605	23321	22785	17589	18228	13816	22145	18967	13083	15725.3
unknown329	0.0065055	0.11639	18	15	1857.75	0.527654	1	20	12	12094.5	0.022911	0.233374	19	13.6167	10447.5	2494.59	0.238775	10802	11127	10536	11534	8623	10281	7861	6920	14537	12069	12160	9612	9321	8848	10442	12100	10423.3
unknown372	0.0065055	0.11639	24	12	1934.82	0.091351	1	23.0287	12	10285.8	0.00500871	0.113653	23.5144	12.0051	7652.7	2796.54	0.365432	5447	6749	4799	4095	7784	5968	6519	10703	11995	10592	8476	10080	7932	6434	5803	8366	7608.88
unknown4	0.0065055	0.11639	24	3	598.566	0.105165	1	27.4766	6.63e-05	3942.49	0.0056698	0.118981	25.7383	1.60868	2970.75	675.587	0.227413	4393	4742	3013	3622	2838	3562	3125	2207	2288	2291	2443	2360	2410	3073	2437	2531	2958.44
unknown566	0.0065055	0.11639	24	15	999.849	0.168742	1	24.2975	12	7555.75	0.00857837	0.143367	24.1488	13.5098	6171.05	1648	0.267053	5926	5196	4280	3559	5350	6007	5257	7264	7775	9559	6229	6660	6245	6868	5950	6682	6175.44
unknown57	0.0065055	0.11639	24	15	1214.63	0.0541815	1	22.6735	12	12302.8	0.00315486	0.0889358	23.3368	13.4683	11172.9	1122.37	0.100455	10667	10441	9620	10131	10073	10584	9543	10697	13866	12289	11619	11437	11601	12216	12350	11433	11160.4
unknown695	0.0065055	0.11639	24	18	1577.56	0.040138	1	27.6489	17.9999	3826.75	0.00241548	0.0812287	25.8245	18.0903	2490.31	445.849	0.179033	250	1652	657	2296	1587	1243	2134	1008	4203	2492	2792	3872	4514	3124	4174	3495	2468.31
unknown757	0.0065055	0.11639	24	3	841.104	0.0685544	1	28	6.63e-05	3831.24	0.00388682	0.0982803	26	1.62503	2676.92	573.503	0.21424	4416	4253	3729	2927	2487	3374	3008	2133	2213	2144	1980	1800	1810	2579	1373	2431	2666.06
unknown953	0.0065055	0.11639	18	0	1913.96	0.491799	1	28	12	7144.5	0.0215793	0.229003	23	4.92857	7271.1	2159.38	0.296981	9578	9098	9252	9369	5085	6115	6454	6555	8493	7105	6241	6739	7050	6942	5301	7673	7315.62
Malioxamycin	0.00815751	0.136892	24	15	391.737	0.109278	1	23.1496	12	2161.5	0.00715173	0.133465	23.5748	13.4773	1701.08	518.286	0.30468	1397	1515	1225	961	1373	1895	1308	1515	2340	2577	1877	1852	1418	2214	1792	1898	1697.31
2'-O-Methylguanosine	0.00980952	0.136892	24	3	313.955	0.0671649	1	28	6.63e-05	2043.49	0.00548498	0.11717	26	1.62503	732.553	174.432	0.238115	2827	2342	1547	1458	550	404	376	244	187	430	295	136	221	353	130	168	729.25
2-Hydroxy-4-methylpentanoic acid	0.00980952	0.136892	24	3	3062.13	0.152648	1	24.8451	6.63e-05	6981.49	0.0112366	0.169243	24.4225	1.52644	4656.41	2175.22	0.467144	7640	8832	8726	2728	3228	5808	6853	8266	2334	2673	2104	2892	2595	2503	2197	4890	4641.81
Alanine	0.00980952	0.136892	24	15	8501.19	0.191963	1	26.4865	12	51809.2	0.0136991	0.180151	25.2432	13.6069	44288.9	7966.57	0.179878	36511	37578	33312	32264	35135	44133	36513	53589	53846	63770	45280	44341	52025	48078	41522	53700	44474.8
Ile-Lys	0.00980952	0.136892	24	15	4490.48	0.156624	1	21.7778	12	33888	0.0114897	0.169243	22.8889	13.4589	26504.7	9033.82	0.340839	22853	22234	20683	16461	24305	26979	18519	29704	34530	43476	28643	28903	25044	30256	21828	27113	26345.7
Nicotinic acid	0.00980952	0.136892	24	15	8673.37	0.220217	1	27.1385	12	48936.8	0.0154187	0.193845	25.5692	13.6434	41291.4	8223.15	0.199149	37164	29009	32582	25453	37129	50109	32255	40496	51722	49196	42755	52074	38696	62170	38258	45501	41535.6
Pyruvic acid	0.00980952	0.136892	24	15	3981.01	0.103849	1	25.5652	12	18462.8	0.00803684	0.137886	24.7826	13.5609	13743.3	5882.85	0.428053	7172	5636	12314	7249	11899	18995	10261	15228	20576	20017	16646	16612	9975	18737	13445	16492	13828.4
Thr-Lys	0.00980952	0.136892	24	15	3682.97	0.0879161	1	23.1496	12	15411.5	0.00694742	0.132391	23.5748	13.4773	12313.6	3107.83	0.252391	8882	10784	7854	10410	10514	8489	7811	13629	17369	16413	13667	14197	13964	11620	13277	17775	12290.9
unknown1000	0.00980952	0.136892	18	12	1404.14	0.113877	1	20	12	5994.75	0.00870992	0.143843	19	12.0333	4518.04	1608.18	0.355945	4139	4255	2716	2813	4634	4386	2860	5381	6355	7072	5049	5503	3778	3990	2966	3352	4328.06
unknown114	0.00980952	0.136892	24	18	919.592	0.143847	1	26.9725	18	3505.75	0.0106725	0.165191	25.4862	18.0614	2399.77	735.073	0.30631	488	2377	1502	2914	1746	1466	2135	772	2746	2285	2809	2644	3901	2416	4375	3331	2369.19
unknown119	0.00980952	0.136892	24	18	2693.9	0.188889	1	26.0177	18	14773.2	0.0135096	0.179333	25.0088	18.0293	11710.7	2259.28	0.192925	8059	11541	9307	12871	8136	8532	10979	8910	13873	9679	12259	13060	16389	10016	16929	15759	11643.7
unknown1389	0.00980952	0.136892	18	9	3121.35	0.723031	1	25.7143	6	17153.2	0.0421917	0.318153	21.8571	8.01429	14771.1	2613.95	0.176964	11665	10499	12608	9738	15990	17916	13690	21017	14901	15517	14407	17014	12715	20978	10484	13191	14520.6
unknown167	0.00980952	0.136892	24	18	537.048	0.0976288	1	22.6735	17.9999	4935.5	0.00761459	0.135365	23.3368	18.0145	4452.3	354.574	0.0796384	3632	4594	4292	4559	3820	3774	4175	3836	5073	4225	5045	4602	5050	4529	5286	4877	4460.56
unknown1786	0.00980952	0.136892	18	15	1570.31	0.0471526	1	20	12	7900.25	0.00401432	0.0982803	19	13.6167	6155.94	1993.99	0.323914	6438	4497	6111	5438	3905	5255	3464	5245	8352	8030	8210	7009	5256	7558	7005	6413	6136.62
unknown1795	0.00980952	0.136892	24	3	1973.54	0.0953637	1	28	6.63e-05	8738.24	0.00745989	0.133465	26	1.62503	6210.42	187.415	0.0301774	10890	8643	7854	7566	7295	6505	5715	6774	5388	6183	5792	3871	2996	6437	3758	3643	6206.88
unknown1976	0.00980952	0.136892	24	3	3588.92	0.140469	1	28	6.78e-05	12742.7	0.0104546	0.165191	26	1.62503	7541.58	2466.79	0.327091	14284	9205	20326	7156	6438	10570	6747	10351	5954	4780	3489	4416	2472	4402	5280	4048	7494.88
unknown2057	0.00980952	0.136892	24	6	22308.5	0.0913638	1	28	6.63e-05	74273.4	0.00718539	0.133465	26	3.25003	51038.6	7645.01	0.149789	109842	61287	70391	55574	53405	52951	79083	64086	43916	38744	35325	41366	27781	21500	18226	45130	51162.9
unknown44	0.00980952	0.136892	24	18	1286.4	0.0945651	1	27.1385	17.9999	6649.49	0.00740522	0.133465	25.5692	18.068	4914	1216.89	0.247638	2613	4452	3834	5644	3835	3278	4455	2899	5012	3923	5647	5586	7249	5433	7717	6199	4861
unknown522	0.00980952	0.136892	24	15	9795.2	0.164474	1	23.6461	12	78123.5	0.0119867	0.172447	23.8231	13.4896	66407	13324.7	0.200651	61209	63636	45782	49853	57591	62274	57131	73499	88714	86502	63341	73937	68324	72240	62681	75139	66365.8
unknown525	0.00980952	0.136892	24	12	12307.5	0.192768	1	26.3284	12	58145.2	0.0137486	0.180151	25.1642	12.0257	47614.5	13940.9	0.292788	36159	38017	28990	19122	49087	62867	40945	66328	65197	67648	48853	50883	42353	59400	38919	55697	48154.1
unknown529	0.00980952	0.136892	24	3	560.382	0.23648	1	22.3291	6.63e-05	1419.75	0.0163921	0.194362	23.1646	1.44782	1026.42	413.393	0.402752	1261	1669	2111	638	1167	2099	909	1460	469	578	550	589	360	1122	968	591	1033.81
unknown584	0.00980952	0.136892	18	15	1564.83	0.94387	1	20	12	7887.25	0.0526107	0.365265	19	13.6167	5872.86	2747.72	0.467867	6354	6274	7783	6345	3148	4952	4548	4894	6106	11353	5871	8219	5108	5694	2481	4410	5846.25
unknown767	0.00980952	0.136892	24	12	11868.4	0.22791	1	23.52	12	43909.8	0.0158806	0.194362	23.76	12.0012	28721.8	16429.2	0.572012	23439	14043	12643	7050	27034	30852	11609	51096	38804	62638	33884	40313	24953	38812	15635	24692	28593.6
unknown900	0.00980952	0.136892	24	3	3364.77	0.0805437	1	28	6.63e-05	14701.5	0.00643403	0.127357	26	1.62503	9804.08	202.09	0.0206128	19274	15161	12723	11648	11086	11073	9256	9806	7808	8998	9297	6489	5523	8756	4093	5813	9800.25
unknown972	0.00980952	0.136892	24	15	1563.41	0.235776	1	20	12	8159.75	0.0163502	0.194362	22	13.475	5259.6	3638.14	0.691716	5771	2441	3989	2973	4328	4289	1557	4233	6357	13158	7664	5460	5237	6215	4699	4217	5161.75
unknown1050	0.0121536	0.152691	24	15	2616.12	0.377209	1	27.6489	12	10232.8	0.0292722	0.266989	25.8245	13.6742	7802.04	2567.55	0.329087	4593	4157	5478	3425	7311	9413	4157	8662	10292	10369	10376	9894	5274	17289	8275	7292	7891.06
unknown322	0.0121536	0.152691	24	18	559.321	0.147879	1	28	17.9999	3309.74	0.0131586	0.176566	26	18.1071	2443.92	529.848	0.216803	1772	1426	2177	2767	1916	2177	2269	1322	2463	1934	2321	2869	2686	3852	3733	2968	2415.75
Gln-Trp	0.0144977	0.152691	24	6	457.145	0.245351	1	28	6	1952.25	0.0236145	0.237155	26	6.03571	1608.21	252.188	0.156812	2574	2099	1756	1122	1982	2180	1486	2161	1536	1862	1326	1450	1012	1358	1051	1051	1625.38
Leucrose	0.0144977	0.152691	24	6	3831.81	0.192427	1	28	6.09e-05	14022.7	0.0191985	0.211791	26	3.25003	8459.51	1413.77	0.167122	18714	8897	21442	7038	8101	11700	6248	16018	5738	5234	3629	5366	3048	5722	4174	4651	8482.5
N-Acetyltryptophan	0.0144977	0.152691	24	3	1753.27	0.231564	1	28	6.63e-05	9047.47	0.0224817	0.232037	26	1.62503	4338.13	426.058	0.0982125	14241	12443	4941	4565	4692	3903	3710	3158	2346	3502	2844	2092	1417	2635	827	1965	4330.06
N-Isobutyrylglycine	0.0144977	0.152691	24	12	142.836	0.231238	1	25.1282	12	713.75	0.0224547	0.232037	24.5641	12.0063	586.882	173.848	0.296223	489	466	370	328	510	778	467	934	740	791	636	688	539	637	508	561	590.125
Pro-Leu-Arg	0.0144977	0.152691	24	6	3315.8	0.299246	1	23.7736	6	19258	0.0279403	0.261682	23.8868	6.00014	15379.6	3463.4	0.225195	16167	16668	15167	15730	22403	16332	20273	18024	9820	12241	21208	15577	7851	15950	13200	9258	15366.8
Ser-Thr	0.0144977	0.152691	24	6	1816.56	0.0535111	1	28	7.37e-05	7612.24	0.00633171	0.127104	26	3.25003	5068.29	48.6759	0.00960401	10236	8456	5523	6234	5918	6000	5854	5058	3683	3877	4275	3568	3038	4017	2447	2896	5067.5
unknown1010	0.0144977	0.152691	24	18	322.264	0.158854	1	20.6557	12	3811.75	0.0162905	0.194362	22.3279	14.8587	3559.17	496.942	0.139623	3615	3639	3244	3395	3192	3411	2970	3120	4349	3487	3555	3856	3771	3773	3524	4094	3562.19
unknown104	0.0144977	0.152691	24	18	441.942	0.0417672	1	23.1496	12	4742.5	0.00509214	0.113697	23.5748	14.9508	4346.35	512.621	0.117943	3929	4034	3974	4031	3909	4070	3945	4164	5333	4601	4581	4455	4817	4400	4621	4680	4346.5
unknown1059	0.0144977	0.152691	24	3	1930.76	0.0958638	1	28	6.63e-05	10637.7	0.0105328	0.165191	26	1.62503	7123.6	103.758	0.0145654	13689	11936	8056	8870	7707	7819	7170	6510	5496	6299	6753	5724	5129	5676	3145	4030	7125.56
unknown1086	0.0144977	0.152691	24	15	3359.46	0.194356	1	23.7736	12	25898.5	0.0193629	0.212645	23.8868	13.4932	22520.9	3697.15	0.164166	17602	21771	17237	20327	19936	18115	22225	24222	28667	21217	26177	27533	26653	20280	23698	24556	22513.5
unknown1153	0.0144977	0.152691	18	9	9332.75	0.263823	1	23.7736	6	40800.2	0.0251148	0.246815	20.8868	7.85741	33647.2	8970.79	0.266613	30652	27087	22937	18324	36413	45545	27089	54154	37405	43932	30978	35025	25720	32433	22443	28791	32433
unknown1175	0.0144977	0.152691	24	6	2454.72	0.0708563	1	28	7.56e-05	8914.74	0.00809566	0.137886	26	3.25004	6077.06	15.407	0.00253528	11654	9969	7698	6338	6847	6797	7072	6776	4204	4901	5144	5101	2207	5947	3300	3274	6076.81
unknown1448	0.0144977	0.152691	24	18	592.202	0.259698	1	25.5652	18	3866	0.0247814	0.244399	24.7826	18.0179	3117.37	577.97	0.185403	2512	2881	2645	3348	2537	1962	3202	2158	3362	2513	3773	3303	3955	2745	4853	3911	3103.75
unknown1504	0.0144977	0.152691	24	15	892.546	0.138112	1	22.1053	12	4819	0.0144436	0.187498	23.0526	13.4611	3984.19	901.317	0.226223	3774	3926	2697	2881	3102	3296	2933	4295	5397	4583	4373	4923	4941	3443	4024	4938	3970.38
unknown1519	0.0144977	0.152691	24	12	2135.82	0.339611	1	24.0327	12	14378.2	0.0310861	0.27521	24.0163	12	11980	2775.26	0.231658	11577	9039	8480	9079	11520	12040	9110	17560	15745	16316	13070	12382	11301	13039	10012	11434	11981.5
unknown1572	0.0144977	0.152691	24	15	1522.75	0.117027	1	22.2166	12	8289	0.0125196	0.175589	23.1083	13.4622	6898.04	1499.76	0.217419	6690	6794	4659	4885	5551	5530	5317	7527	9445	8045	7694	7972	8064	6601	6871	8375	6876.25
unknown159	0.0144977	0.152691	24	18	2410.53	0.232468	1	22.7907	17.9999	12734.2	0.0225563	0.232037	23.3953	18.012	10260.9	2131.36	0.207717	7151	10879	8296	13044	6374	6818	8992	7874	13015	9420	11598	10496	14256	8537	14355	13789	10305.9
unknown1603	0.0144977	0.152691	24	12	2729.26	0.307393	1	24.4321	12	17344.8	0.0285813	0.26253	24.2161	12.001	14341	3653.43	0.254755	12979	10440	10275	10689	13475	15238	11203	21738	19627	19843	14709	15200	14356	15070	11523	13506	14366.9
unknown1645	0.0144977	0.152691	24	12	18138.3	0.235053	1	25.7143	6	63793.2	0.0227695	0.232783	24.8571	9.11429	51329.7	16940.3	0.33003	32309	33915	27510	27883	66775	59385	40653	88360	49990	71091	61629	71343	46071	71723	38012	45275	51995.2
unknown1688	0.0144977	0.152691	24	12	3222.29	0.271328	1	24.4321	12	24490.5	0.0257189	0.250019	24.2161	12.001	21031.8	4487.63	0.213374	20590	16824	14704	16764	20208	19659	20234	30720	25136	27242	22238	23346	21976	20436	17602	19340	21063.7
unknown1982	0.0144977	0.152691	24	15	3573.01	0.69588	1	28	17.9999	10713.5	0.0564597	0.379398	26	16.4821	7293.97	390.625	0.0535545	3297	2826	5043	1795	7469	9177	3498	3317	4008	11762	10961	10564	3702	22853	9952	6347	7285.69
unknown2028	0.0144977	0.152691	24	6	21658.3	0.107466	1	28	7.87e-05	63715.1	0.0116295	0.169243	26	3.25004	32382.9	380.026	0.0117354	73876	44555	105238	31192	26999	40438	32376	60364	14968	17074	14137	15933	5293	8220	7495	20067	32389.1
unknown215	0.0144977	0.152691	24	6	49821.7	0.0969335	1	28	7.56e-05	181593	0.0106347	0.165191	26	3.25004	124693	134.462	0.00107835	254238	150439	179995	141700	141985	111130	176612	142375	115707	87608	106491	108532	66341	47710	54040	110143	124690
unknown240	0.0144977	0.152691	24	15	2717.76	0.271431	1	28	17.9999	9716	0.0257271	0.250019	26	16.4821	7268.82	1605.43	0.220866	3829	4403	3225	1996	8476	9135	4716	6255	7877	7525	11052	9493	6021	10634	15620	6589	7302.88
unknown262	0.0144977	0.152691	24	3	1590.46	0.122498	1	20	6.00001	5351	0.0130237	0.176453	22	4.675	3790.39	1772.08	0.46752	4645	4685	5599	2726	4244	6569	3466	7125	2372	2473	1499	1804	2486	3910	3834	2339	3736
unknown285	0.0144977	0.152691	24	15	2165.87	0.880114	1	28	12	5797	0.0684105	0.419634	26	13.6964	4571.04	1490.4	0.326053	1411	3209	2035	1506	2225	12877	3195	2497	7016	5280	5406	5486	4664	7962	3980	5296	4627.81
unknown392	0.0144977	0.152691	24	6	2720.24	0.0174052	1	28	7.81e-05	6931.49	0.00234288	0.0812287	26	3.25004	3952.3	27.656	0.00699744	7082	7938	6739	5967	3492	5131	6124	4253	2821	2258	2864	2088	1380	1370	1523	2214	3952.75
unknown403	0.0144977	0.152691	18	0	593.793	0.0956584	1	27.3065	17.9999	1955	0.0105132	0.165191	22.6533	18.7929	2031.95	426.049	0.209675	2394	2861	2790	2815	1453	2100	1939	1559	1961	1787	1570	1852	1783	1899	2023	2115	2056.31
unknown466	0.0144977	0.152691	24	15	5085.87	0.701639	1	28	17.9999	20254.5	0.0568431	0.380453	26	16.4821	15941.9	2118.46	0.132886	9115	6667	14819	6992	15586	26399	9561	9977	18284	22000	16908	18464	16945	35115	12616	16342	15986.9
unknown470	0.0144977	0.152691	24	18	613.415	0.104219	1	22.3291	17.9999	3478	0.0113246	0.169243	23.1646	18.0234	2860.07	518.248	0.181201	1946	2839	2857	3339	2130	2150	2329	1979	3219	2655	3535	3119	3162	2987	4179	3584	2875.56
unknown480	0.0144977	0.152691	24	18	855.246	0.168422	1	21.6708	17.9999	5385.75	0.0171288	0.195929	22.8354	18.0469	4773.81	446.441	0.0935188	4642	4989	3932	4590	3955	3648	3903	4387	5585	4289	5384	5842	5811	4207	5919	5606	4793.06
unknown628	0.0144977	0.152691	24	15	2916.82	0.159798	1	23.3952	12	23260.2	0.0163736	0.194362	23.6976	13.4831	19745.9	3954.45	0.200266	18090	19132	13530	14945	17671	18089	16699	21335	26337	26343	18549	21812	20039	21237	19598	22198	19725.2
unknown731	0.0144977	0.152691	18	9	4846.51	0.636466	1	24.8451	6	18736.2	0.0524627	0.365146	21.4225	7.94237	14875	4522.35	0.304023	9629	10293	9708	7591	12868	20078	11416	30583	16497	18307	13849	16395	10251	13076	17833	11377	14359.4
unknown867	0.0144977	0.152691	24	3	715.946	0.100548	1	28	6.63e-05	5149.49	0.0109779	0.167428	26	1.62503	3981.7	297.918	0.0748217	5285	5988	5168	4157	3546	4563	4255	3545	3423	3413	3573	3486	2944	3751	2707	3813	3976.06
unknown958	0.0144977	0.152691	24	15	2247.01	0.29268	1	20.7529	12	11660	0.0274214	0.258994	22.3765	13.462	8355.54	3945.44	0.472194	7434	4415	6780	5731	7699	8051	4113	7223	10534	17245	10542	8319	7902	12040	5626	8541	8262.19
unknown968	0.0144977	0.152691	24	21	1033.08	0.490607	1	26.0177	17.9999	4531.48	0.0422912	0.318153	25.0088	19.5924	2401.73	1655.68	0.689367	2654	3079	2800	414	962	757	446	1424	1104	2210	1669	1698	1926	9557	2502	4141	2333.94
unknown974	0.0144977	0.152691	24	15	800.445	0.230877	1	22.3291	12	7093.25	0.0224249	0.232037	23.1646	13.4634	5723.61	1663.71	0.290675	5402	5188	3953	3668	4740	5567	4520	6905	7615	8867	5779	6112	5635	6086	5061	6115	5700.81
unknown985	0.0144977	0.152691	24	12	1995.46	0.241751	1	23.9024	12	7245	0.0233199	0.235818	23.9512	12	5496.42	2614	0.475582	5545	3664	3654	2349	7478	5903	3962	9760	7404	10055	5006	6515	4288	3812	4153	4328	5492.25
unknown226	0.0177588	0.176176	24	15	2112.13	0.146748	1	20.2759	12	16033.2	0.018112	0.203833	22.1379	13.4691	12989.5	3688.62	0.283969	12876	10376	12810	8347	10711	12810	9179	12966	15469	18063	16493	14108	11182	15726	12980	12211	12894.2
Cytosine	0.0210199	0.176176	18	0	283.903	0.364932	1	28	12	230	0.0450303	0.330735	23	4.92856	301.699	299.555	0.992894	895	583	597	491	215	56	42	304	314	458	77	71	395	173	110	145	307.875
Flavin?adenine?dinucleotide	0.0210199	0.176176	18	6	97.9343	0.564056	1	20	6.00002	341.5	0.0644381	0.405657	19	6.01667	247.575	90.8776	0.367071	192	247	167	238	306	366	443	251	293	115	102	105	121	207	364	268	236.562
Fumaric acid	0.0210199	0.176176	18	0	119.147	0.336182	1	24.8451	17.9999	809.749	0.0420626	0.318153	21.4225	18.4714	746.413	142.66	0.191127	1182	805	855	818	667	565	739	598	730	725	556	719	666	952	779	842	762.375
Ile-Pro	0.0210199	0.176176	24	12	37118.9	0.243067	1	20.6557	12	196905	0.0320692	0.277818	22.3279	12.0677	133389	67294.5	0.504499	122545	102494	58495	56526	123776	110851	74632	194889	216386	280384	128434	162415	99118	108511	95829	144372	129979
Met-Thr	0.0210199	0.176176	24	6	1026.01	0.104288	1	28	6.63e-05	3799.74	0.0156142	0.194362	26	3.25003	2350.01	358.029	0.152352	5652	3685	2770	3092	2978	2873	2450	2046	1724	2293	1954	1486	902	1794	799	1009	2344.19
Pantothenic acid	0.0210199	0.176176	24	12	106468	0.279297	1	22.9091	12	680909	0.0360335	0.300207	23.4545	12.0065	531305	162584	0.30601	519926	448928	374107	243441	469078	646887	388868	660109	718168	865276	540428	599765	456217	593264	402729	528005	528450
Pro-Ala	0.0210199	0.176176	24	12	81192.7	0.29935	1	23.6461	12	329296	0.0381844	0.305628	23.8231	12.0007	246529	108193	0.438867	229001	220057	126673	105226	270873	240833	180389	436346	375902	402819	230649	307814	207985	223469	141492	234958	245905
Pyroglutamic acid	0.0210199	0.176176	24	15	34117.2	0.253385	1	23.3952	12	211641	0.0332091	0.281722	23.6976	13.4831	174569	41551	0.238021	168983	161290	106464	122225	143368	171029	128338	198315	224914	257767	155396	208486	176515	200606	168827	197097	174351
Thr-Ala	0.0210199	0.176176	24	3	2853.88	0.0852131	1	28	6.63e-05	15729.5	0.0131201	0.176566	26	1.62503	10082.3	890.552	0.0883283	18929	16153	11325	16511	9941	8519	11521	7315	6747	7670	9885	7464	8081	6277	6257	8452	10065.4
Tyr-Ser	0.0210199	0.176176	24	15	1304.26	0.126829	1	24.2975	12	4084.5	0.0184675	0.20625	24.1488	13.5098	2991.22	1139.09	0.380812	1542	2215	1827	1873	1840	1983	1645	4428	4756	4626	3034	3922	4347	3058	3491	3321	2994.25
Val-Asp	0.0210199	0.176176	24	15	4369.21	0.29766	1	23.52	12	25396.5	0.0380042	0.305628	23.76	13.4862	18397.1	9046	0.491707	14640	16248	7443	8839	16462	14739	11593	31657	30770	29833	19299	21684	19587	17803	13755	19398	18359.4
beta-Alanine	0.0210199	0.176176	24	12	6362.19	0.355216	1	24.0327	12	39837.5	0.0440328	0.325789	24.0163	12	33942	7648.68	0.225345	34825	30471	24061	22435	33510	35307	28348	49244	43547	42053	35296	38454	32732	34078	25782	32995	33946.1
beta-Hydroxymyristic acid	0.0210199	0.176176	24	15	1624.58	0.119657	1	27.3065	12	9576	0.0175695	0.200149	25.6533	13.6534	7956.9	2003.92	0.251847	4795	7599	5401	3691	7479	9527	6314	10343	10013	10145	9467	8679	7897	8581	9708	8676	8019.69
unknown1002	0.0210199	0.176176	24	6	2492.55	0.160814	1	28	5.67e-05	8909.99	0.0226134	0.232037	26	3.25003	5485.91	658.524	0.120039	11622	6249	12921	4848	5592	7006	3944	10061	3474	3869	2818	3613	2007	4166	3025	2731	5496.62
unknown1019	0.0210199	0.176176	24	18	16669	0.583433	1	28	17.9999	208622	0.0662376	0.411735	26	18.1071	70332.9	76519.3	1.08796	17574	23550	36391	6145	26467	7891	10192	11803	15441	18445	25889	25967	505314	66706	206203	56268	66265.4
unknown1155	0.0210199	0.176176	24	15	1729.58	0.138491	1	25.8651	12	9415	0.0199094	0.216215	24.9326	13.5751	7629.02	2151.19	0.281974	6705	5770	4676	4616	6528	8395	5468	10169	10376	10095	8009	9180	9031	8142	6700	8801	7666.31
unknown1249	0.0210199	0.176176	24	3	1038.74	0.156499	1	28	6.63e-05	6087.49	0.0220961	0.232037	26	1.62503	4738	349.611	0.0737887	6976	5887	5867	5620	5232	5035	4227	5263	3706	4759	5019	4413	2304	4960	3397	3249	4744.62
unknown1257	0.0210199	0.176176	24	15	1146.93	0.078286	1	23.52	12	6015.75	0.0121931	0.173566	23.76	13.4862	4896.41	1265.44	0.258443	3238	4436	3834	3797	4563	4646	4102	4727	5808	6160	5904	6191	3957	6262	6196	4437	4891.12
unknown131	0.0210199	0.176176	24	18	1938.18	0.210542	1	28	18	7618.49	0.0284137	0.26253	26	18.1071	5404.87	1365.05	0.252559	1276	5014	3409	6697	4140	3012	5605	2372	6205	4281	6470	6362	8228	5629	9407	7210	5332.31
unknown1343	0.0210199	0.176176	24	3	2259.21	0.144564	1	28	8.02e-05	10158.7	0.020652	0.221692	26	1.62504	7647.8	415.049	0.0542704	12875	9206	11050	7504	8553	9165	7182	8832	5675	8457	6509	5810	3169	7498	5821	4933	7639.94
unknown149	0.0210199	0.176176	24	18	662.559	0.164176	1	21.4599	17.9999	6489.25	0.0230148	0.23358	22.7299	18.0563	5622.52	953.803	0.16964	5123	5741	5684	6973	4256	4650	5224	4097	6174	4857	6091	5859	6343	5480	7567	6567	5667.88
unknown1605	0.0210199	0.176176	24	18	1230.54	0.804519	1	28	17.9999	64351.7	0.0859039	0.467364	26	18.1071	19608.9	23256.7	1.18603	3322	2967	2388	3585	4768	2284	2114	2212	2692	4046	2944	3232	184796	4765	40753	27094	18372.6
unknown1630	0.0210199	0.176176	24	6	1294.71	0.244269	1	25.2722	5.99998	7496.75	0.0322024	0.277818	24.6361	6.00399	6354.93	669.391	0.105334	8269	6449	7205	6723	6541	9767	6800	6879	5048	4732	6936	6183	4007	6313	5710	4343	6369.06
unknown1680	0.0210199	0.176176	24	15	1489.52	0.202269	1	26.0177	12	5508.75	0.0274676	0.258994	25.0088	13.5826	4273.77	1155.32	0.270328	3171	1962	3556	2594	3176	4543	2224	4464	4420	5181	6207	6227	3275	7410	6090	4228	4295.5
unknown1696	0.0210199	0.176176	24	15	2760.54	0.401189	1	23.0287	12	9311	0.0487054	0.347664	23.5144	13.4748	5578.45	4863.97	0.871921	2382	1773	2817	1845	5274	1933	2557	13229	8969	14915	6494	6866	7182	2327	4405	5644	5538.25
unknown1714	0.0210199	0.176176	24	3	4308.4	0.157452	1	28	6.63e-05	17768.2	0.0222106	0.232037	26	1.62503	12505.5	2672.61	0.213714	20065	18223	19613	13172	12783	17918	11076	9642	7874	10171	10141	10000	6303	15036	10224	7038	12454.9
unknown189	0.0210199	0.176176	24	12	1112.63	0.352114	1	26.6465	12	7397.25	0.0437132	0.324478	25.3233	12.0329	6332.84	1102.59	0.174107	5650	5273	4642	3774	5742	7794	5419	7291	7913	8000	5874	7802	5651	8862	5516	6899	6381.38
unknown1905	0.0210199	0.176176	24	6	3427.35	0.291114	1	28	6.05e-05	14688	0.0373045	0.30298	26	3.25003	10731.8	188.759	0.0175887	22625	14815	10633	10679	13165	8730	11395	15946	7930	11325	12772	8893	4451	7197	4558	6546	10728.8
unknown1911	0.0210199	0.176176	24	15	1273.5	0.31369	1	28	17.9999	6672	0.039705	0.306971	26	16.4821	5736.25	280.031	0.0488178	3311	4990	4049	4180	5437	4496	5507	6539	6541	4602	6599	8936	8366	5277	5763	7282	5742.19
unknown1943	0.0210199	0.176176	24	6	2571.39	0.0668413	1	28	6.63e-05	7206.74	0.0106326	0.165191	26	3.25003	4693.89	936.812	0.199581	9696	7759	4797	6575	7374	4788	7765	4148	3065	3019	5032	3006	1341	3120	1919	1942	4709.12
unknown1984	0.0210199	0.176176	24	6	6379.16	0.12135	1	28	5.79e-05	17019.7	0.0177823	0.20175	26	3.25003	10157.1	1328.47	0.130792	27005	11715	16257	13102	13451	6954	19110	12393	7096	4511	7890	8797	3193	1565	1882	7938	10178.7
unknown2135	0.0210199	0.176176	24	6	2263.1	0.0519585	1	28	5.25e-05	8109.49	0.00854025	0.143367	26	3.25002	5525.68	222.254	0.040222	8739	6226	9810	7663	6615	6357	5096	6840	4888	3943	4481	5281	2008	2771	2726	4909	5522.06
unknown2222	0.0210199	0.176176	18	15	1354.46	0.971964	1	20	12	5296.25	0.0999202	0.494463	19	13.6167	4947.45	1601.98	0.323799	10350	4886	5225	4726	3175	3597	2038	3320	5346	5246	4554	6039	2431	10012	4172	3794	4931.94
unknown233	0.0210199	0.176176	24	18	3770.29	0.280864	1	26.1721	18	25549.7	0.0362027	0.3006	25.0861	18.0338	21136.1	3243.93	0.153478	17037	18545	18437	23175	17659	15091	21342	15851	23644	18553	21982	23018	27805	17124	28705	28565	21033.3
unknown299	0.0210199	0.176176	24	15	7023.69	0.113978	1	20	12	26042.2	0.0168522	0.194362	22	13.475	14206.6	14531.5	1.02287	10282	2087	9617	6967	10256	10306	3495	9942	18689	42137	22014	21329	9491	22560	11989	9891	13815.8
unknown337	0.0210199	0.176176	24	3	388.202	0.244709	1	21.0501	5.99996	1361.75	0.0322511	0.277818	22.5251	4.618	957.257	423.445	0.442352	896	955	1922	1011	1002	2023	800	1622	488	668	405	492	454	941	918	560	947.312
unknown362	0.0210199	0.176176	24	3	4956.46	0.0444905	1	28	6.63e-05	23546.9	0.00745788	0.133465	26	1.62503	13710.2	1693.81	0.123544	26631	20505	23614	23438	10307	12471	13972	11286	11722	12741	7346	7939	10405	9768	6126	10579	13678.1
unknown377	0.0210199	0.176176	24	15	841.104	0.184701	1	23.1496	12	4431.75	0.0254347	0.249081	23.5748	13.4773	3550.15	940.164	0.264823	3416	3308	1953	2272	3118	3173	2856	3142	5164	5373	3279	3911	4834	3387	3448	4059	3543.31
unknown427	0.0210199	0.176176	24	3	1222.94	0.209757	1	25.7143	6.14e-05	4717	0.0283242	0.26253	24.8571	1.5536	3486.54	1207.19	0.346242	5112	4992	5236	3528	3705	5645	3210	2782	1936	2378	2824	2579	1856	4534	2764	2471	3472
unknown592	0.0210199	0.176176	24	12	21484.9	0.170437	1	24.9858	12	100526	0.0237584	0.237155	24.4929	12.0049	75840.2	28674.1	0.378085	68336	64749	29358	27287	74662	94989	61642	102400	89768	120339	81528	110471	65727	92749	50553	86356	76307.1
unknown66	0.0210199	0.176176	24	3	2677.46	0.0998843	1	20	6.00001	8762.25	0.0150455	0.19318	22	4.675	6263.49	2956.53	0.472026	6858	8946	9426	3176	8085	10952	6664	9348	3433	3892	2666	2858	5244	5912	6690	4614	6172.75
unknown661	0.0210199	0.176176	24	21	1664.71	0.322084	1	23.0287	17.9999	7452.49	0.0405887	0.311217	23.5144	19.4773	5852.97	1865.56	0.318736	6488	6603	8640	5456	4589	4295	3861	3132	4201	4265	6266	6676	6834	10852	7752	4372	5892.62
unknown671	0.0210199	0.176176	24	3	1622.99	0.0800072	1	20.3695	6	5003.75	0.0124246	0.175136	22.1848	4.65389	3611.43	1524.03	0.422	4298	4856	5463	2725	4471	5706	3500	6338	2332	2264	1508	1778	2414	3702	3585	2155	3568.44
unknown702	0.0210199	0.176176	24	3	824.133	0.156134	1	28	6.63e-05	3813.25	0.0220523	0.232037	26	1.62503	2928.01	465.792	0.159082	5005	4115	3546	2587	3224	3684	2995	3419	1847	2522	2557	2673	1452	2956	2602	1523	2919.19
unknown915	0.0210199	0.176176	24	21	460.15	0.190783	1	24.5682	17.9999	3548.25	0.0261423	0.252468	24.2841	19.5202	2944.31	542.33	0.184196	2354	3080	2665	3966	2429	2483	2450	2176	2975	2406	2953	2875	3733	3029	4091	3340	2937.81
3-Methylhistidine	0.0299489	0.202391	18	9	2370.58	0.287444	1	24.9858	12	9962.5	0.0495426	0.350059	21.4929	10.5345	8546.78	1988.07	0.23261	7766	5849	5342	5115	9731	8126	8142	12591	10653	9613	7207	12377	9017	9310	5732	6838	8338.06
Deoxyadenosine	0.0299489	0.202391	24	6	573.464	0.206706	1	28	6.63e-05	2566.99	0.0376683	0.304731	26	3.25003	1578.9	397.311	0.251638	3893	2888	1773	1714	1772	2039	1383	1333	1030	1651	1310	971	707	1219	495	981	1572.44
Gly-Asp	0.0299489	0.202391	24	18	3823.68	0.139938	1	28	17.9999	20584.5	0.0271359	0.257607	26	18.1071	16990.4	676.067	0.039791	12655	15980	12858	13030	14382	19736	10880	15525	20846	20035	17897	15110	17898	21992	22386	20062	16954.5
Gly-Met	0.0299489	0.202391	24	6	777.11	0.15895	1	28	6.63e-05	2309	0.0302161	0.271168	26	3.25003	1579.64	437.014	0.276654	3290	2526	2053	1367	1876	2777	1528	1843	972	1449	1095	851	575	1858	602	726	1586.75
His-Tyr	0.0299489	0.202391	24	3	5772.82	0.0363409	1	28	6.99e-05	18344	0.0085144	0.143367	26	1.62503	11325	2221.62	0.196169	22937	15743	18061	16635	13012	16399	12031	8383	6948	8608	9601	6789	5113	8412	5780	6075	11282.9
Indole-3-carboxaldehyde	0.0299489	0.202391	24	15	1228.6	0.262496	1	22.1053	12	5610.75	0.0459565	0.334894	23.0526	13.4611	4308.32	1517.11	0.352134	4010	3255	2899	2735	2770	3746	2941	5779	6768	6122	5564	3989	3524	4098	5216	5145	4285.06
Oleoyl-L-carnitine	0.0299489	0.202391	24	6	2329.92	0.204574	1	24.0327	6.63e-05	6330.75	0.0373433	0.30298	24.0163	3.00208	4545.37	2390.56	0.525933	6245	10613	5778	2687	5737	8019	4247	6691	2462	2411	3566	2675	2457	3381	3485	2272	4545.38
P-Toluenesulfonic acid	0.0299489	0.202391	24	0	337.643	0.480683	1	26.6465	6.63e-05	2007.74	0.0754464	0.443307	25.3233	3.15e-05	1135.27	706.845	0.622621	3689	1198	2392	752	620	1986	492	839	339	521	540	679	658	1316	817	907	1109.06
Palmitic acid	0.0299489	0.202391	24	21	2483.01	0.368324	1	25.8651	17.9999	28048.2	0.0607479	0.393381	24.9326	19.5835	23604.5	3232.5	0.136944	21012	23686	23731	23153	22241	20266	20865	17193	20818	16789	30151	23609	26396	31191	31359	23247	23481.7
Phytosphingosine	0.0299489	0.202391	24	0	112.96	0.585264	1	28	12.8948	1343.25	0.0884106	0.471621	26	5.98687	1447.75	193.968	0.133979	1742	2146	1473	1483	1243	1280	1286	1556	1271	1250	1611	1241	1349	1300	1409	1315	1434.69
Trp-Lys	0.0299489	0.202391	24	6	2275.47	0.249927	1	27.3065	6	9089.25	0.0441233	0.325789	25.6533	6.02502	7284.06	1089.27	0.149542	12569	8737	8223	5746	10430	10958	7276	7693	6173	7175	6851	5858	3883	7692	3578	4678	7345
unknown1013	0.0299489	0.202391	24	3	495.682	0.0731617	1	28	6.63e-05	2841.25	0.0156081	0.194362	26	1.62503	2085.88	26.6233	0.0127636	3349	3024	2585	2407	2039	2356	2249	1760	1792	1888	1948	1719	1381	1609	1385	1875	2085.38
unknown1125	0.0299489	0.202391	24	21	1147.99	0.505711	1	28	17.9999	13211.7	0.078606	0.445921	26	19.7321	4661.12	4586.24	0.983937	1325	1654	2171	566	2072	576	796	905	1071	1121	1984	1839	30059	5054	13999	3735	4307.94
unknown1146	0.0299489	0.202391	24	6	2438.81	0.21492	1	28	6.63e-05	13234.2	0.0389142	0.305628	26	3.25003	10991.7	1215.42	0.110577	15153	14905	11795	11084	12848	13870	11246	11876	9216	10512	9961	10344	5769	13029	8750	5825	11011.4
unknown1251	0.0299489	0.202391	24	3	2982.93	0.076267	1	28	4.77e-05	9413.49	0.0161756	0.194362	26	1.62502	5821.77	955.011	0.164041	10766	10383	9897	6608	7977	7118	6157	4285	2959	6128	4869	2855	1581	5715	2773	2788	5803.69
unknown1373	0.0299489	0.202391	24	12	35977.1	0.230229	1	25.1282	12	226134	0.0412117	0.314267	24.5641	12.0063	190384	45062.8	0.236694	182362	147493	128832	123077	181556	225711	154414	268963	260972	234261	186247	223055	173169	201614	180042	187829	191225
unknown1432	0.0299489	0.202391	24	15	993.485	0.242815	1	21.3559	12	5400.25	0.0430776	0.321469	22.678	13.4583	3942.6	1735.36	0.440156	3504	3409	2472	1987	3302	2929	2822	4434	7495	5273	3560	5273	3796	3398	3338	5526	3907.38
unknown1447	0.0299489	0.202391	24	21	748.826	0.212107	1	23.9024	17.9999	3047.74	0.0384886	0.305628	23.9512	19.497	2562.14	831.065	0.324364	2473	3418	3156	3659	1842	1745	2385	1691	2368	1603	2444	2047	2667	1938	4147	3439	2563.88
unknown1492	0.0299489	0.202391	24	15	476.944	0.326726	1	28	12	3035.75	0.0550597	0.373136	26	13.6964	2645.12	370.912	0.140225	1332	2409	1947	2547	2680	2591	2736	2119	3746	2744	2576	3077	2251	3519	3392	2882	2659.25
unknown1594	0.0299489	0.202391	24	9	3838.53	0.185905	1	24.0327	12	21729.8	0.0344682	0.291298	24.0163	10.499	18375	4307.82	0.234439	19999	18111	10972	15511	23986	18364	16971	23336	22385	20965	20701	22868	15931	15829	11592	16527	18378
unknown1699	0.0299489	0.202391	24	12	873.63	0.441226	1	24.0327	12	6025.5	0.0703852	0.42652	24.0163	12	5085.62	1181.56	0.232334	4790	4210	3739	3781	4653	5297	4041	7821	7106	6105	5468	5423	4649	5489	3983	4825	5086.25
unknown1730	0.0299489	0.202391	24	9	2328.86	0.291191	1	24.5682	6	15520.5	0.0500755	0.352931	24.2841	7.51858	12734.1	2595.88	0.203853	14245	13692	11893	10034	14941	14599	14306	18236	10106	10919	13642	18685	11138	11404	8242	8168	12765.6
unknown1744	0.0299489	0.202391	18	12	1383.45	0.21761	1	24.0327	6	15798.8	0.0393202	0.305698	21.0163	9.62892	13663	2862.95	0.209541	13407	12885	11154	8596	14717	15783	12121	20574	15985	16171	11497	16807	11174	10124	9595	11807	13274.8
unknown1918	0.0299489	0.202391	24	15	710.819	0.273454	1	20	12	5060	0.04754	0.341091	22	13.475	4061.95	1241.55	0.305655	3992	3961	3018	3193	3305	4338	2410	3841	5237	6179	4446	4378	3028	4877	4060	4194	4028.56
unknown1967	0.0299489	0.202391	24	12	1161.42	0.313199	1	23.2718	12	5905.5	0.0531767	0.366024	23.6359	12.0028	4473.73	1635.09	0.365487	4350	3327	2541	2427	4169	4645	2934	7105	7122	6789	5173	4538	3389	5299	3791	3672	4454.44
unknown1988	0.0299489	0.202391	24	6	4028.03	0.218343	1	28	5.97e-05	11490.7	0.0394307	0.305698	26	3.25003	6459.09	397.637	0.0615623	19684	12392	3903	9984	9744	4467	8464	7555	2907	5919	4943	2777	2727	3818	2114	1844	6452.62
unknown203	0.0299489	0.202391	24	3	300.874	0.269515	1	24.7059	6.63e-05	1921.75	0.0469723	0.339606	24.3529	1.52209	1621.04	312.864	0.193002	1757	2091	2131	1708	1424	2066	1889	1525	1092	1188	1592	1487	1072	1694	1553	1639	1619.25
unknown2119	0.0299489	0.202391	24	15	5801.1	0.553446	1	28	17.9999	15972	0.0845307	0.462598	26	16.4821	8944.6	69.6628	0.00778825	1573	829	4261	1182	8592	10623	2525	4539	4887	14820	12168	13203	3865	34779	17093	8151	8943.12
unknown2228	0.0299489	0.202391	24	6	958.483	0.122946	1	28	6.63e-05	2646.5	0.0243176	0.240675	26	3.25003	1867.77	406.308	0.217537	3379	2914	2902	1391	2508	3117	2209	1537	835	1745	1374	1948	978	1026	1181	946	1874.38
unknown24	0.0299489	0.202391	24	6	3965.45	0.316824	1	28	6.63e-05	18388.5	0.053683	0.367229	26	3.25003	9731.39	4577.9	0.470426	23499	30828	7865	11362	11486	6963	12567	6527	4728	8320	7543	5994	4617	3995	2556	5661	9656.94
unknown291	0.0299489	0.202391	18	9	809.284	0.832222	1	20	5.99999	3793.75	0.116942	0.530688	19	7.59999	3017.83	898.247	0.297647	1821	2046	2146	1398	2574	4044	2176	6381	3215	3120	2754	3008	2222	2657	3407	2491	2841.25
unknown296	0.0299489	0.202391	24	21	464.216	0.166569	1	20	17.9999	4700.5	0.031431	0.27521	22	19.525	4305.22	425.394	0.0988089	4650	4034	4558	5086	3479	3995	3737	3199	5147	4534	3998	4293	4147	4870	4716	5069	4344.5
unknown360	0.0299489	0.202391	24	15	3680.14	0.175411	1	28	17.9999	7799.49	0.0328277	0.28019	26	16.4821	4587.33	1138.11	0.248099	1069	1265	1892	761	1436	967	4828	4306	3616	3136	11750	6787	10531	5168	10221	5278	4563.19
unknown446	0.0299489	0.202391	18	15	1008.33	0.351255	1	20	12	7672	0.0584318	0.388293	19	13.6167	5855.77	1899.56	0.32439	5850	4652	6894	5782	5044	5836	5693	4059	7777	8640	6925	7346	5977	4025	4174	4724	5837.38
unknown49	0.0299489	0.202391	24	18	3729.63	0.401565	1	27.1385	17.9999	36850.5	0.0651911	0.408873	25.5692	18.068	31847.3	3732.92	0.117213	27779	31140	28565	32964	25836	25939	37823	23738	33070	29151	31379	32170	41557	31197	38161	36487	31684.8
unknown556	0.0299489	0.202391	18	9	1423.41	0.449324	1	26.1721	5.99999	4331	0.0714322	0.428747	22.0861	8.05314	3503.19	1077.9	0.30769	2454	1822	1872	1490	3294	4846	2645	6539	4459	4667	3335	3511	2806	4538	3368	2922	3410.5
unknown664	0.0299489	0.202391	18	15	4171.58	0.947454	1	20	12	17399.2	0.129455	0.569886	19	13.6167	13900.4	5505.87	0.396095	20861	13025	14939	14605	13015	10527	8761	7494	12651	14716	17066	25164	10303	17011	12048	9367	13847.1
unknown779	0.0299489	0.202391	24	12	28482.1	0.28622	1	23.9024	12	190748	0.0493683	0.350059	23.9512	12.0001	162411	36343.1	0.223772	167197	137964	114319	118215	174403	157916	136340	228339	214047	199150	167091	182702	164634	147796	131710	155831	162353
unknown902	0.0299489	0.202391	24	9	33171.8	0.363162	1	25.4179	6.00001	146786	0.06005	0.39191	24.7089	7.54925	121491	32202.5	0.26506	147262	102494	124910	95162	165294	130891	85665	205293	124113	124699	165911	150802	88464	81339	92350	74865	122470
unknown95	0.0299489	0.202391	24	18	1559.52	0.136859	1	27.4766	17.9999	5421.5	0.02663	0.25541	25.7383	18.0825	3995.57	743.348	0.186043	2305	3056	2529	3916	2811	2337	3286	3110	5590	3804	4150	4785	6754	2877	6340	5715	3960.31
unknown1752	0.0359573	0.236141	24	21	796.556	0.319431	1	22.5575	17.9999	3969.99	0.0627891	0.400177	23.2788	19.4722	3110.83	857.523	0.275657	2205	3387	3121	5041	1911	2098	2671	1796	2894	2310	3776	3121	3704	2814	5018	4344	3138.19
1,7-Dimethyluric acid	0.0419656	0.236141	24	18	636.043	0.0611457	1	20.0911	12	2900.75	0.0178733	0.201961	22.0456	14.8508	2267.5	931.197	0.410672	2141	1660	2351	1981	1546	1873	1219	1917	2965	3293	2891	2454	1884	2865	2871	2500	2275.69
3-Hydroxyanthranilic acid	0.0419656	0.236141	24	6	436.638	0.327621	1	28	6.63e-05	1818.75	0.0726873	0.434412	26	3.25003	1434.17	300.993	0.209873	1414	2790	1946	1125	1886	1884	1332	1746	1262	951	1518	1016	897	878	1151	1229	1439.06
3-Hydroxyphenylacetic acid	0.0419656	0.236141	24	6	5618.32	0.34023	1	24.8451	6.63e-05	16006.5	0.0749455	0.442849	24.4225	3.05285	11832.6	5324.43	0.44998	13159	27682	16697	6488	18398	17639	10079	16895	8764	5335	11893	6352	5678	5906	7984	10440	11836.8
Gln-Pro	0.0419656	0.236141	24	12	2274.23	0.269842	1	21.0501	12	11624.2	0.0620654	0.398217	22.5251	12.0517	7729.67	3965.38	0.513008	7526	5449	3460	2319	6866	7073	3986	10583	14007	16732	7025	8733	6849	6728	5198	8265	7549.94
Gly-His	0.0419656	0.236141	24	18	2173.47	0.144543	1	25.8651	17.9999	12892.2	0.0370324	0.30298	24.9326	18.0252	11350.5	343.8	0.0302894	9623	11310	7829	9817	9670	9809	8147	12714	14181	13349	11812	11626	12316	11953	12742	14558	11341
His-Arg	0.0419656	0.236141	24	9	1168.14	0.396992	1	23.52	6.00001	5442	0.0848784	0.463592	23.76	7.48562	4462.87	1127.68	0.252681	5194	3522	3669	2772	5382	5939	3609	6838	5297	5825	3960	4665	3230	4715	3062	3542	4451.31
Phenylacetaldehyde B	0.0419656	0.236141	24	15	47940.8	0.465013	1	25.5652	12	186870	0.0963354	0.486206	24.7826	13.5609	142938	48418	0.338734	106177	103545	96121	62255	97702	147288	84654	200240	188747	242941	130693	185099	129414	264320	108397	150622	143638
Ribose A	0.0419656	0.236141	24	15	776.05	0.112328	1	20.1831	12	5336.5	0.0299675	0.269804	22.0915	13.471	4441.52	1083.04	0.243844	4490	3518	4507	3267	3561	4275	3344	4044	5422	5754	5164	5006	3926	5503	4699	4130	4413.12
Thr-Met	0.0419656	0.236141	24	6	4263.32	0.301222	1	28	6.63e-05	17856.2	0.0678921	0.418294	26	3.25003	10843.2	2966.15	0.273549	28869	19539	12588	10429	12694	14567	9045	8713	7158	12340	9160	6259	4140	8416	3113	5690	10795
Thr-Phe	0.0419656	0.236141	24	3	4033.34	0.218514	1	28	6.63e-05	15375.7	0.0521943	0.364186	26	1.62503	8742.49	1174.54	0.134349	25916	12218	13580	9789	9534	13678	7511	6729	5033	8151	6703	4377	2448	8183	2873	2801	8720.25
Tyr-Leu	0.0419656	0.236141	24	3	2278.65	0.233281	1	28	6.63e-05	9776.98	0.0550814	0.373136	26	1.62503	6058.65	163.205	0.0269376	14701	9973	8144	6290	6887	7599	5006	4946	4191	6204	4944	3934	2965	6296	1884	2925	6055.56
Val-Met	0.0419656	0.236141	24	6	8944.19	0.473743	1	28	6.63e-05	46301.2	0.0977741	0.489924	26	3.25003	32829.3	6063.68	0.184703	74583	49493	34992	26137	36978	37696	29502	36838	28024	42351	35410	25166	16413	21689	9595	18824	32730.7
Val-Phe	0.0419656	0.236141	24	3	8766	0.113881	1	28	6.63e-05	28554.4	0.0303161	0.27117	26	1.62503	15180.1	1983.57	0.130669	41715	26735	23538	22230	18448	19657	13045	7320	6827	11934	14109	7489	5321	13694	4880	5339	15142.6
unknown1053	0.0419656	0.236141	24	15	8758.22	0.338141	1	21.6708	12	40587	0.0745728	0.441895	22.8354	13.4585	27587.9	15470	0.560751	25972	17145	17021	8839	21030	26136	11113	34355	37537	62932	29469	32410	26825	38057	15178	32857	27304.8
unknown1096	0.0419656	0.236141	24	18	1022.83	0.234203	1	27.4766	17.9999	3269.99	0.0552603	0.373442	25.7383	18.0824	1924.32	943.731	0.490423	319	1403	607	3008	946	694	1651	545	2285	1018	2223	2294	4054	1904	4627	2495	1879.56
unknown110	0.0419656	0.236141	24	3	1527	0.053249	1	28	6.63e-05	6594.99	0.0158741	0.194362	26	1.62503	4620.82	247.732	0.0536121	7960	6253	6396	5771	3498	5612	5330	4914	4110	4146	3604	3626	2637	3439	2762	3800	4616.12
unknown1104	0.0419656	0.236141	24	6	1014.17	0.814729	1	28	6.51e-05	4126.49	0.149611	0.620213	26	3.25003	2506.38	526.109	0.209908	1987	10466	2532	1521	4370	2909	1949	3488	1680	499	2703	1063	1582	738	1381	1371	2514.94
unknown1198	0.0419656	0.236141	24	15	10221.6	0.58295	1	23.3952	12	119094	0.115238	0.528129	23.6976	13.483	106468	14938.9	0.140314	97380	98745	84196	98092	84442	107230	90003	132403	140585	109649	109250	116894	104166	114610	103721	110867	106390
unknown1205	0.0419656	0.236141	18	9	2099.05	0.496892	1	24.9858	12	8887.5	0.101557	0.499904	21.4929	10.5345	7620.92	1781.06	0.233707	5816	8597	4399	2547	8832	9828	6570	9216	8737	6423	12238	8152	7933	6491	7890	5274	7433.94
unknown1208	0.0419656	0.236141	24	6	1030.25	0.516463	1	28	4.67e-05	4941	0.10472	0.507028	26	3.25002	4105.18	757.741	0.184582	6914	3529	5454	3867	5244	3724	6174	4118	3347	3121	3336	4761	2430	4635	2979	2247	4117.5
unknown1209	0.0419656	0.236141	18	9	2864.49	0.46842	1	25.2722	6	13533.5	0.0968978	0.487279	21.6361	7.97739	11689.7	2390.45	0.204492	11562	7682	8202	6787	12216	14116	9994	17808	12374	14064	11963	12410	9499	14222	9618	10496	11438.3
unknown1297	0.0419656	0.236141	24	15	2110.18	0.437023	1	21.7778	12	9570.5	0.0916753	0.477361	22.8889	13.4589	6451.59	3734.59	0.578863	4308	3386	4573	3591	6034	8140	1787	5871	9672	13831	8375	6404	4107	12087	3654	6354	6385.88
unknown1372	0.0419656	0.236141	24	15	30617.5	0.789432	1	28	12	121232	0.146011	0.612807	26	13.6964	92178.3	31913	0.34621	52688	28690	73380	32062	101186	116010	53342	98639	87151	121383	130485	145909	33424	245109	116926	57919	93393.9
unknown1409	0.0419656	0.236141	24	15	2330.09	0.249802	1	22.3291	12	14600.5	0.0582649	0.388293	23.1646	13.4634	12509	2196.84	0.175621	10252	13465	9544	9916	10605	13450	8590	11231	16269	15855	15039	11239	12135	15404	13460	13208	12478.9
unknown1425	0.0419656	0.236141	24	21	562.503	0.708163	1	25.8651	17.9999	9385.24	0.134208	0.579838	24.9326	19.5835	8152.82	950.676	0.116607	7839	8908	7717	7728	7100	7075	7948	6877	7080	7806	8807	7441	7807	8936	12892	7906	8116.69
unknown1438	0.0419656	0.236141	24	21	410.475	0.429824	1	22.1053	17.9999	3953.25	0.0904649	0.47371	23.0526	19.4712	3434.62	467.051	0.135983	2757	3588	3202	4742	2523	2873	2889	3023	3327	3125	3946	3462	3789	3395	4768	3861	3454.38
unknown1454	0.0419656	0.236141	24	12	1155.94	0.231814	1	20	12	8693.75	0.0547964	0.373017	22	12.1	6503.95	2334.11	0.358875	5681	5663	5433	4071	6768	5949	4488	7009	10114	10510	7305	6846	3713	7860	4753	5697	6366.25
unknown1577	0.0419656	0.236141	24	9	1010.1	0.438376	1	23.6461	6.00002	5545	0.0919023	0.477653	23.8231	7.48928	4472.54	1137.87	0.254414	5418	4045	3593	2819	5244	5260	3670	8006	4965	5546	4562	4376	2915	3964	3569	3471	4463.94
unknown1648	0.0419656	0.236141	24	6	181.019	0.416451	1	26.4865	6	564.75	0.0882025	0.471621	25.2432	6.01459	435.465	116.049	0.266493	646	263	505	554	359	592	650	658	307	393	719	316	289	291	236	267	440.312
unknown1709	0.0419656	0.236141	24	12	4566.14	0.357557	1	23.6461	12	25519	0.0780169	0.445287	23.8231	12.0007	20841.8	5804.53	0.278504	21145	14924	17858	12003	21222	25093	15094	28189	25247	31927	19790	25112	17840	22553	16214	18722	20808.3
unknown1772	0.0419656	0.236141	24	6	1635.54	0.276563	1	25.7143	6.63e-05	6411.75	0.0633256	0.401686	24.8571	3.10717	5300.74	1373.62	0.259138	7562	6563	6294	5228	5660	7758	4716	7415	4249	4938	4561	3890	2268	6712	3982	3086	5305.12
unknown1809	0.0419656	0.236141	18	0	2276.35	0.267137	1	20	17.9999	18525.5	0.061556	0.395859	19	18.05	16253	2568.82	0.158052	15589	19715	17314	22277	12398	13773	11279	13688	17906	15376	19561	16000	14706	17113	23000	19283	16811.1
unknown1872	0.0419656	0.236141	18	9	3961.57	0.535553	1	26.0177	12	12476.5	0.107775	0.516838	22.0088	10.5777	10559.1	2753.53	0.260773	8083	7390	5590	4182	17590	12237	11019	8396	6857	15301	10871	16877	13729	10417	8183	8544	10329.1
unknown192	0.0419656	0.236141	24	15	693.318	0.319241	1	21.5648	12	6328.5	0.0711752	0.428747	22.7824	13.4583	5116.99	1506.65	0.294441	5527	4571	3569	2984	4299	4940	4093	6352	6532	7791	5315	5676	4985	5309	4278	5193	5088.38
unknown2033	0.0419656	0.236141	24	12	808.577	0.361288	1	24.2975	12	4939	0.0786736	0.445921	24.1488	12.0005	4238.15	1095.7	0.258533	3939	4139	2525	2916	4864	4542	3619	6474	6203	4997	4557	3999	3544	3567	3699	4312	4243.5
unknown2060	0.0419656	0.236141	24	21	21119.2	0.211044	1	20	17.9999	121260	0.0507181	0.355664	22	19.525	103352	20686.5	0.200156	107624	109470	98076	158309	73100	72512	71942	70930	122604	90733	125300	98554	103294	101673	152607	127468	105262
unknown21	0.0419656	0.236141	24	3	12349.6	0.446404	1	26.1721	5.15e-05	78290.9	0.0932454	0.480856	25.0861	1.5679	61609.3	15976.7	0.259322	79381	64504	111378	57901	55525	77311	44188	82733	53945	46745	35505	55447	47593	56576	63005	50374	61381.9
unknown2103	0.0419656	0.236141	24	3	530.684	0.372307	1	26.3284	7.54e-05	1987.25	0.0806038	0.450832	25.1642	1.5728	1331.92	603.69	0.453247	1964	1797	2763	1425	1170	2442	682	1311	1057	604	678	934	557	1952	956	875	1322.94
unknown2157	0.0419656	0.236141	24	3	7367.7	0.414516	1	21.6708	6.63e-05	21914	0.0878738	0.471621	22.8354	1.42725	15282.2	7782.9	0.50928	12591	18606	44058	12401	16209	31866	16172	22434	5771	8892	4668	6435	6948	18488	15995	6297	15489.4
unknown2181	0.0419656	0.236141	24	3	645.942	0.258212	1	23.2718	6.63e-05	1760	0.0598676	0.39191	23.6359	1.47728	1238.91	528.554	0.426628	1436	2020	2372	1212	940	2156	964	2449	595	858	718	533	332	1302	1312	683	1242.62
unknown236	0.0419656	0.236141	24	15	1394.24	0.273761	1	28	12	5785	0.062801	0.400177	26	13.6964	4692.83	1338.44	0.285209	2324	2590	3360	2185	3799	5643	3263	7942	6051	6529	4886	5674	5125	5263	7127	4140	4743.81
unknown256	0.0419656	0.236141	24	21	453.255	0.356277	1	21.3559	17.9999	4084.75	0.0777912	0.445041	22.678	19.4787	3601.76	475.699	0.132074	3089	3754	3804	4648	2762	2755	3625	2864	3999	3130	3733	3582	4060	3497	4836	3946	3630.25
unknown374	0.0419656	0.236141	24	12	1284.99	0.741704	1	26.0177	12	8632.25	0.139124	0.597379	25.0088	12.0196	7253.91	1961.02	0.27034	6229	6285	4290	2983	6662	7719	5167	14082	8084	10054	7089	9302	6000	6919	9755	6494	7319.62
unknown433	0.0419656	0.236141	24	18	1175.57	0.152455	1	27.3065	17.9999	3898.5	0.0387186	0.305628	25.6533	18.075	2785.77	624.169	0.224056	1182	2408	1454	3075	1871	1499	2527	1746	3467	2364	3366	3565	4980	2184	4265	4165	2757.38
unknown441	0.0419656	0.236141	24	12	19863.5	0.414505	1	24.9858	12	146724	0.0878718	0.471621	24.4929	12.0049	130205	25194.3	0.193497	130883	105280	90478	99224	132052	134323	125311	189720	161473	150078	126353	148993	146823	136250	100538	112059	130615
unknown492	0.0419656	0.236141	24	18	905.45	0.340822	1	23.7736	17.9999	5442.25	0.075051	0.442849	23.8868	18.0004	4550.64	711.731	0.156402	3321	4358	4135	5342	3553	3279	4418	3335	5219	4003	5568	4553	5821	3702	6387	5859	4553.31
unknown563	0.0419656	0.236141	24	15	5688.14	0.253959	1	23.9024	12	91019	0.0590587	0.390599	23.9512	13.497	84150.9	8282.72	0.0984269	81713	80460	75552	71783	80355	86874	73450	91951	92687	88563	88115	94711	83616	92963	79422	84086	84143.8
unknown591	0.0419656	0.236141	24	15	580.888	0.290756	1	21.6708	12	4626.5	0.0659647	0.411735	22.8354	13.4585	3704.96	1141.59	0.308123	3897	3281	2549	2131	3016	3551	2854	4795	4674	5588	3964	4280	3287	3733	3220	4125	3684.06
unknown609	0.0419656	0.236141	24	3	4785.17	0.1759	1	28	4.93e-05	17597.2	0.0436168	0.324478	26	1.62502	11891.3	1740.45	0.146363	21122	17671	18356	13240	9852	19766	10612	11755	6549	11705	10534	8000	5454	13143	8780	3195	11858.4
unknown618	0.0419656	0.236141	24	6	2586.24	0.324025	1	21.5648	6.00001	10042	0.0720395	0.431464	22.7824	6.01719	7593.94	1410.16	0.185696	11449	9563	7229	6481	11135	12919	8543	7571	4160	5911	6179	6171	2622	9802	6989	3908	7539.5
unknown620	0.0419656	0.236141	24	21	787.717	0.369747	1	22.7907	17.9999	3393.49	0.0801566	0.450112	23.3953	19.4742	2611.1	858.456	0.328772	1997	3298	2636	4114	1776	1174	2351	1507	2478	1922	3024	2292	3575	1760	4666	3573	2633.94
unknown680	0.0419656	0.236141	24	15	658.847	0.36182	1	28	17.9999	7520.25	0.0787671	0.445921	26	16.4821	6772.67	567.674	0.0838184	6243	6588	5884	5776	5771	6810	5828	6502	6713	7401	7789	6784	6612	7452	9422	6595	6760.62
unknown725	0.0419656	0.236141	24	9	9711.23	0.370647	1	23.9024	6.00002	54580.2	0.0803138	0.450112	23.9512	7.49699	47460.3	9290.93	0.195762	51189	42221	38248	31051	52995	59287	43687	62352	56003	58634	43187	52462	38120	54295	35239	40085	47440.9
unknown775	0.0419656	0.236141	24	15	5899.04	0.429315	1	25.4179	12	60234.5	0.090379	0.47371	24.7089	13.5542	52795.2	9761.72	0.184898	49976	46525	38291	39571	47834	57660	40981	71861	70122	60282	53929	56605	50861	54871	52530	54864	52922.7
unknown784	0.0419656	0.236141	24	15	1688.92	0.257672	1	28	17.9999	5583	0.0597652	0.39191	26	16.4821	4305.01	680.297	0.158025	2231	2437	2206	1500	2682	5629	2417	5808	5387	8108	3791	4583	4502	7425	4075	6330	4319.44
unknown828	0.0419656	0.236141	24	18	2274.76	0.191581	1	28	17.9999	10167.5	0.0468187	0.339405	26	18.1071	7083.79	1453.94	0.205248	3504	5606	3547	7487	4654	4045	5202	6840	8920	6617	8287	6725	14621	6038	10377	9634	7006.5
unknown863	0.0419656	0.236141	24	15	5905.4	0.434564	1	25.8651	17.9999	19633	0.0912624	0.4761	24.9326	16.4669	14486.1	4061.06	0.280343	6853	4248	16644	10787	10862	9336	11799	8653	16216	14944	20818	21236	10506	20557	34665	12804	14433
unknown877	0.0419656	0.236141	24	3	3191.88	0.145722	1	28	6.63e-05	14201.7	0.0372849	0.30298	26	1.62503	8893.37	474.848	0.0533935	19607	14387	12535	10278	8789	11582	7301	7092	5994	8355	7839	5905	4474	8710	3953	5349	8884.38
unknown899	0.0419656	0.236141	24	15	732.386	0.429053	1	28	17.9999	3583.75	0.0903349	0.47371	26	16.4821	2723.13	306.52	0.112562	1043	2297	1428	2718	2605	2015	2729	1736	2828	3022	3229	3481	2508	3589	5821	2417	2716.62
Pro-Phe	0.0499351	0.266686	24	12	16640.3	0.350937	1	21.0501	12	79306	0.0883946	0.471621	22.5251	12.0517	55346.2	25949.7	0.468861	55986	43920	25164	21183	53505	44935	34684	83281	88243	112657	55344	60980	46828	49846	29185	60980	54170.1
unknown670	0.0499351	0.266686	24	9	1086.82	0.283897	1	21.7778	5.99998	7574.75	0.0745137	0.441895	22.8889	7.44472	6033.43	1263.69	0.209448	6932	6267	5118	4222	8167	8548	6267	7317	4885	6522	5485	6866	4161	7135	3695	3995	5973.88

## Sheet: unique cycling perAM in perAS
CycID	JTK_pvalue	JTK_BH.Q	JTK_period	JTK_adjphase	JTK_amplitude	LS_pvalue	LS_BH.Q	LS_period	LS_adjphase	LS_amplitude	meta2d_pvalue	meta2d_BH.Q	meta2d_period	meta2d_phase	meta2d_Base	meta2d_AMP	meta2d_rAMP	0	0.1	0.2	0.3	6	6.1	6.2	6.3	12	12.1	12.2	12.3	18	18.1	18.2	18.3	PerS
1,7-Dimethyluric acid	1	1	24	6	91.3936	0.99966	1	28	5.66e-05	1294.25	1	1	26	3.25003	1202.23	12.5178	0.0104121	1158	1539	1264	1216	1830	1202	738	1258	1390	1029	1411	987	1462	908	937	910	1202.44
2'-O-Methylguanosine	0.0579045	0.164742	24	18	100.409	0.436233	0.954985	25.5652	17.9999	435.75	0.118179	0.304841	24.7826	18.0179	326.097	94.3163	0.289227	334	528	147	198	166	307	195	262	409	248	380	265	406	413	467	457	323.875
2-Hydroxy-4-methylpentanoic acid	0.0787266	0.19462	18	15	529.446	0.994911	1	28	12	1836.25	0.277812	0.565554	23	14.5119	2026.97	1106.15	0.545716	2065	9136	1540	1683	1028	1185	1082	1323	2452	1293	2090	1510	1345	1251	1692	1703	2023.62
3-Hydroxyanthranilic acid	0.105571	0.233107	24	21	375.297	0.167454	0.616574	28	17.9999	2281.99	0.0890172	0.24667	26	19.7321	1488.73	414.498	0.278423	1406	1004	1023	1299	1273	977	1463	998	753	1823	1146	1016	1753	2406	2634	2335	1456.81
3-Hydroxyphenylacetic acid	0.139706	0.285865	18	3	519.9	0.165032	0.616258	28	17.9999	20974.7	0.109973	0.288896	23	9.3095	11142.3	4431.49	0.397717	11758	6488	4783	9233	8447	7160	10277	5968	4069	15861	7488	6137	14051	22544	25609	21695	11348
3-Methylhistidine	0.475047	0.709773	24	3	1902.29	0.647988	1	28	8.03e-05	11124.2	0.670512	1	26	1.62504	9174.9	27.8564	0.00303615	11742	10943	10501	11311	7031	9730	9955	12695	11137	6800	10103	5999	4808	10694	8598	4743	9174.38
4-Methyl-2-oxovaleric Acid	0.0579045	0.164742	24	0	1486.34	0.393195	0.901382	24.2975	6.63e-05	5056.74	0.108885	0.287238	24.1488	3.3e-05	4309.09	2067.49	0.479797	6536	3587	4080	6024	3390	4405	2476	3011	3710	3120	2790	2394	3164	5404	9063	5633	4299.19
Alanine	0.0579045	0.164742	24	3	6427.6	0.283061	0.770755	26.6465	6.63e-05	51087.9	0.0837729	0.23665	25.3233	1.58274	41286.7	8098.2	0.196145	58253	39598	49559	56942	38363	42014	35354	45884	47983	32856	29341	27436	32854	43815	40358	37896	41156.6
Arg-Pro	0.0579045	0.164742	24	6	2114.96	0.0855363	0.589446	28	6.16e-05	5810.99	0.031242	0.124566	26	3.25003	3857.55	442.722	0.114768	6756	4466	5866	6156	4867	6182	3960	4218	5599	3922	2260	1000	1536	1790	1845	1413	3864.75
Asp-Val	0.105571	0.233107	24	3	4055.43	0.234496	0.704955	28	6.96e-05	13898.7	0.11632	0.30116	26	1.62503	9791.3	224.988	0.0229784	16573	14496	8565	15961	12712	13292	8535	9958	13047	9992	8331	2765	5413	5884	7553	3652	9795.56
Cytosine	1	1	18	3	43.8406	0.989636	1	25.1282	6.61e-05	206	0.999946	1	21.5641	1.79704	155.713	40.0842	0.257423	65	302	219	238	141	179	52	249	249	80	39	101	143	149	237	85	158
Deoxyadenosine	0.719948	0.96651	24	6	113.844	0.606525	1	28	6.63e-05	808.498	0.798482	1	26	3.25003	499.436	249.718	0.499999	1293	1005	396	540	588	431	260	467	549	386	518	176	312	342	363	300	495.375
Flavin?adenine?dinucleotide	1	1	18	15	24.9255	1	1	20	12	276.5	1	1	19	13.6167	258.876	32.3365	0.124911	435	119	225	315	314	381	129	104	137	455	283	231	158	213	278	360	258.562
Fumaric acid	0.587657	0.827106	18	0	162.281	0.968569	1	28	18	847.75	0.88995	1	23	18.8928	939.388	299.125	0.318425	801	1301	2809	779	798	848	628	541	588	1253	620	875	683	845	1093	770	952
Gln-Ala	0.182589	0.344328	24	3	2972.68	0.308112	0.80069	28	7.01e-05	11787	0.218157	0.470409	26	1.62503	8868.92	636.212	0.071735	12073	11438	11162	12475	9858	12237	7212	9203	12863	8258	5886	3399	5265	7423	7717	5241	8856.88
Gln-Pro	0.0579045	0.164742	24	3	3458.99	0.189554	0.643583	28	6.14e-05	8602.99	0.0605003	0.190798	26	1.62503	5489.36	204.052	0.0371723	12417	8328	5890	7777	6915	9681	5357	5868	9337	4582	2487	891	1741	2772	2559	1166	5485.5
Gln-Trp	0.139706	0.285865	24	3	152.912	0.375513	0.877034	28	6.63e-05	1111	0.207101	0.451225	26	1.62503	798.573	66.5785	0.0833718	1462	1082	827	1073	803	751	584	933	739	791	882	272	619	732	755	452	797.312
Glutamine	0.105571	0.233107	24	3	69983.9	0.307653	0.80069	28	6.9e-05	531368	0.14379	0.34958	26	1.62503	452162	41249.5	0.0912273	606770	472365	445760	600580	452748	537327	401856	474497	494816	413615	375635	342027	371143	415968	446956	370024	451380
Gly-Asp	0.235786	0.416243	24	3	2894.54	0.470181	0.991905	28	5.36e-05	18813	0.3547	0.67071	26	1.62502	15627.1	579.161	0.0370614	22699	14425	20547	17581	19848	17660	13198	16748	18676	16836	13076	8502	11002	14136	13828	11096	15616.1
Gly-Gly	1	1	18	9	161.574	0.999868	1	23.0287	12	6557.75	1	1	20.5144	10.4735	6351.14	132.885	0.020923	7100	5661	6154	5608	6235	6205	5851	6765	7555	6098	5822	6756	6724	6021	6747	6010	6332
Gly-His	0.475047	0.709773	24	6	2516.95	0.458585	0.978655	28	12	15142.8	0.549841	0.932325	26	8.82143	13635.6	1380.87	0.101269	19131	15902	14160	16157	15579	15521	11310	14516	18503	16735	14065	11268	9529	8541	9743	9501	13760.1
Gly-Met	0.139706	0.285865	24	21	146.194	0.686652	1	23.9024	17.9999	887.499	0.320802	0.625687	23.9512	19.497	697.756	206.196	0.295512	1300	705	514	591	547	496	395	568	731	553	859	362	727	1043	1161	619	698.188
Gly-Pro	0.139706	0.285865	24	6	2335.93	0.216206	0.685168	28	5.4e-05	11495.2	0.135916	0.336594	26	3.25003	9106.43	350.262	0.0384632	14004	8954	10943	12080	9970	12309	8142	9802	11113	9090	6897	5408	6623	6739	7917	5803	9112.12
Gly-Pro-Arg	0.0579045	0.164742	18	0	2603.21	0.86791	1	28	12	11081	0.200553	0.440742	23	4.92858	11624.8	3773.94	0.324645	21950	12827	14354	12506	7961	8016	11368	10990	11594	11442	13860	7428	9151	13008	12263	8524	11702.6
His-Arg	0.0579045	0.164742	18	0	732.209	0.53154	1	28	17.9999	2806.75	0.137917	0.340041	23	18.8928	3111.42	679.312	0.218329	5969	3743	3476	4106	2630	2689	2459	2875	3041	3008	3486	1532	2541	3173	3450	2063	3140.06
His-Leu	0.139706	0.285865	18	0	13751.1	0.649263	1	26.1721	6.63e-05	89105	0.308413	0.609617	22.0861	2.8e-05	61034.3	18053.9	0.295799	139582	96403	54098	66338	51538	47590	40050	61348	64155	54020	50061	23779	51701	68609	91646	37168	62380.4
His-Tyr	0.873774	1	24	3	704.985	0.712493	1	28	6.63e-05	6325.74	0.9176	1	26	1.62503	4908.6	797.196	0.162408	8022	8994	3839	4448	5835	4533	3723	5625	4879	3875	4464	3098	4559	4143	4981	3278	4893.5
Ile-Arg	0.301037	0.504016	24	3	44988.3	0.639607	1	28	6.63e-05	316642	0.509749	0.880935	26	1.62503	229500	31471.9	0.137133	498800	335790	220691	211290	271769	204747	172246	259423	268938	150064	221774	108222	178866	204385	208547	146910	228904
Ile-His	1	1	18	0	2439.87	0.995554	1	26.1721	6.63e-05	14667.2	0.99999	1	22.0861	2.8e-05	11979.6	1720.58	0.143626	21461	15140	10129	11939	12606	11591	6165	13307	18667	10970	7484	5885	12274	10959	14841	10308	12107.9
Ile-Lys	0.182589	0.344328	24	3	3851.26	0.811531	1	28	6.63e-05	24725.5	0.431097	0.777758	26	1.62503	19170.6	526.156	0.027446	35979	22227	18312	22384	22121	20595	13046	19628	27177	15399	15160	11091	16663	14078	18265	14445	19160.6
Ile-Pro	0.0579045	0.164742	24	3	81961.5	0.130159	0.592031	28	6.63e-05	231192	0.0443763	0.15444	26	1.62503	131835	4866.62	0.0369144	330860	189397	167699	236814	163775	187007	109872	136190	190316	124380	73428	20337	36007	50280	60636	33841	131927
Indole-3-carboxaldehyde	0.105571	0.233107	24	6	1275.27	0.371981	0.874287	28	4.16e-05	5073.25	0.1664	0.385412	26	3.25002	3956.64	45.3659	0.0114658	5293	4552	4267	6181	5361	5728	3298	3181	5559	3549	2915	2585	2467	3201	2904	2277	3957.38
Isomaltose	0.380147	0.60181	24	6	11010.5	0.221077	0.693248	28	12	40905.8	0.292167	0.584962	26	8.82143	33434.5	7128	0.213193	59330	41944	40763	52404	40907	41880	30865	33634	39249	40951	52063	31360	7110	7677	7489	17606	34077
Ketoisovaleric acid	0.0787266	0.19462	24	3	130.992	0.443136	0.960988	25.2722	6.63e-05	795.499	0.151954	0.360632	24.6361	1.53979	636.864	169.404	0.265997	809	706	763	904	697	717	454	583	501	557	479	485	398	594	970	547	635.25
Lactobionic acid	0.182589	0.344328	24	6	6544.1	0.0986693	0.589446	28	6.63e-05	22694.7	0.0903768	0.248793	26	3.25003	15393.4	3731.44	0.242405	24680	20179	20924	24996	16600	22827	13634	15961	17073	18417	18717	14358	3812	4663	4418	4065	15332.8
Leucrose	0.587657	0.827106	24	6	21678.8	0.190638	0.645717	28	12	62167.8	0.357262	0.67464	26	8.82143	50529.5	11856.3	0.23464	99011	73765	62243	73315	51717	65628	54961	55471	68641	55192	82692	42146	9757	12115	9599	9319	51598.2
Malioxamycin	0.475047	0.709773	24	6	418.254	0.514799	1	28	4.79e-05	2260	0.588964	0.973814	26	3.25002	1786.14	43.4917	0.0243495	2362	1714	2595	2369	2275	2523	1358	1535	2041	1845	1902	796	1222	1528	1606	896	1785.44
Maltotriose	0.182589	0.344328	24	6	11698	0.135528	0.595121	28	6.63e-05	41889.7	0.116283	0.30116	26	3.25003	32491.9	1869.93	0.0575506	51258	41977	34721	39603	41496	41921	32145	36334	35140	36496	51379	25016	11943	13492	13999	12464	32461.5
Met-Thr	1	1	18	0	112.253	0.742821	1	28	6.63e-05	909.248	0.963662	1	23	2.72e-05	589.676	100.633	0.170658	1383	1279	404	571	596	539	424	620	786	468	446	240	447	418	597	275	593.312
N-Acetyltryptophan	0.235786	0.416243	24	6	566.569	0.383588	0.886253	28	6.63e-05	1892.5	0.307785	0.609204	26	3.25003	985.74	479.749	0.486689	3330	2227	770	1243	889	1102	731	1268	1409	918	537	192	237	258	305	231	977.938
N-Isobutyrylglycine	1	1	18	15	52.8562	0.999892	1	26.9725	6	647.25	1	1	22.4862	0.627167	538.397	71.7655	0.133295	517	314	580	944	1643	323	318	305	669	372	806	277	362	578	254	296	534.875
Nicotinic acid	1	1	18	0	1472.37	0.98346	1	25.8651	6.63e-05	35832	0.999862	1	21.9326	2.81e-05	32572	2165.53	0.0664844	44604	32474	31342	34908	36837	31373	25805	32889	32555	32003	34571	23768	34045	36883	30558	29359	32748.4
Oleoyl-L-carnitine	0.0579045	0.164742	24	18	720.365	0.200883	0.662917	26.9725	18	2824	0.063441	0.197176	25.4862	18.0614	1927.98	659.011	0.341815	2449	911	1264	1728	1300	991	1510	1286	1050	1924	3120	1580	3188	2130	2972	3006	1900.56
P-Toluenesulfonic acid	1	1	24	18	188.444	0.990693	1	24.7059	17.9999	1756.75	0.999957	1	24.3529	18.0037	1203.71	586.842	0.487526	1274	2677	534	579	480	555	344	1479	307	1405	1702	792	4169	1116	830	912	1197.19
Palmitic acid	1	1	18	9	2815.7	0.999963	1	26.3284	5.99999	20098.2	1	1	22.1642	8.06655	18557.9	2265.62	0.122084	16227	7667	19465	17035	23134	28531	16170	12558	5987	33646	16777	22938	18976	16963	19365	18493	18370.8
Pantothenic acid	0.0787266	0.19462	24	6	133371	0.152584	0.602253	28	6.63e-05	491979	0.065129	0.199753	26	3.25003	316500	38875.8	0.12283	734304	416113	339781	477722	422681	395882	291709	290879	299389	344964	272325	131622	124318	196025	173968	142209	315868
Phenylacetaldehyde B	0.235786	0.416243	18	3	5338.13	0.784029	1	24.4321	6.63e-05	97469.4	0.496938	0.864685	21.2161	1.76803	87191	26368	0.302416	157684	84967	67461	79766	83378	84445	66802	77855	86405	80298	59908	52398	98928	153037	111071	80080	89030.2
Phytosphingosine	1	1	24	0	34.4715	0.956383	1	24.2975	17.9999	1331.75	0.999035	1	24.1488	21.0192	1280.78	40.94	0.0319649	1185	1277	1344	1341	1074	1262	1293	1296	1223	1244	1289	1333	1395	1209	1417	1306	1280.5
Pro-Ala	0.182589	0.344328	24	3	51281.9	0.472785	0.99438	28	6.63e-05	312713	0.29779	0.59409	26	1.62503	210404	2662.02	0.012652	470723	265420	231843	282867	178508	237220	184429	201571	267796	194393	187479	61975	125154	169311	202869	104096	210353
Pro-Asn	0.0579045	0.164742	24	3	3303.6	0.118119	0.589446	28	7.76e-05	10753.7	0.0409353	0.146475	26	1.62504	7902.09	470.519	0.0595436	11333	9713	10729	11240	9002	10677	6789	9455	11138	7953	5590	4005	4440	4941	5028	4543	7911
Pro-Leu-Arg	1	1	18	0	840.927	0.995205	1	28	12	9413.5	0.999988	1	23	4.92857	10007.6	2188.51	0.218684	25017	9873	11136	7377	11802	7332	6699	10956	8673	12330	10631	6020	6962	11071	8214	6751	10052.8
Pro-Phe	0.0579045	0.164742	24	3	21398.6	0.203972	0.666734	28	6.63e-05	75357.1	0.0642363	0.198322	26	1.62503	43843.7	3189.64	0.0727504	110579	65579	48412	76859	43870	49079	34077	51001	59598	40374	31705	10465	17244	20768	26598	16257	43904.1
Pro-Ser	0.105571	0.233107	24	6	20848.9	0.146282	0.601288	28	5.8e-05	76610.7	0.0798501	0.229282	26	3.25003	57482.4	3542.04	0.0616196	93777	60004	73775	78887	65992	81530	53954	62910	74780	59358	40390	28305	34539	35577	44365	32497	57540
Pyroglutamic acid	0.0579045	0.164742	24	3	48557.6	0.187268	0.639825	28	6.63e-05	224287	0.0599023	0.189555	26	1.62503	168158	495.913	0.00294908	239178	193379	209948	254646	174202	210228	145265	180554	212413	178340	117237	93219	96528	133422	141114	111013	168168
Pyruvic acid	0.301037	0.504016	24	0	1293.48	0.766974	1	25.5652	6.63e-05	11367.5	0.569328	0.952635	24.7826	3.21e-05	9074.07	2149.41	0.236874	16390	8957	8976	11147	10412	10662	4268	6001	8901	8226	8056	5376	8434	10054	9158	9361	9023.69
Ribose A	0.475047	0.709773	24	0	336.583	0.947683	1	23.9024	6.63e-05	2234.5	0.809483	1	23.9512	3.32e-05	1993.85	366.601	0.183866	2378	2645	1676	2239	2848	1552	1047	1904	2110	1437	1996	1393	2181	2037	2521	1947	1994.44
Ser-Ala	0.139706	0.285865	24	0	410.122	0.339787	0.837762	24.1644	6.63e-05	1742.5	0.192144	0.427354	24.0822	3.3e-05	1527.78	504.151	0.329989	2196	2242	1149	1383	1412	1152	1121	1443	1602	1089	1195	940	2073	1970	2009	1447	1526.44
Ser-Thr	0.105571	0.233107	24	21	707.107	0.489353	1	23.3952	17.9999	3150.5	0.204736	0.44747	23.6976	19.484	2555.47	678.943	0.265683	3977	3168	1974	2359	2017	1954	1520	2062	2991	1905	3112	1389	3038	3209	3941	2414	2564.38
Thr-Ala	0.235786	0.416243	24	0	848.528	0.189777	0.643583	20	6.63e-05	5919.5	0.183764	0.415965	22	3.65e-05	4862.17	1339.48	0.27549	5417	6204	4977	7080	5279	5475	4404	5856	5493	3096	2007	2312	6445	4365	5580	5485	4967.19
Thr-Glu	0.587657	0.827106	24	3	12995.2	0.742044	1	28	6.63e-05	73908.9	0.797985	1	26	1.62503	56321.3	2365.54	0.0420008	87708	69019	59418	79491	60977	75834	38591	48401	80094	60676	47108	20192	39671	51686	46343	36649	56366.1
Thr-Lys	0.0579045	0.164742	24	6	6763.48	0.24516	0.716295	28	6.63e-05	20658.5	0.0745966	0.218467	26	3.25003	16737.2	2894.72	0.172952	21845	21486	18511	20792	20877	25788	14344	21430	27827	18071	12388	8339	10181	7261	10591	8817	16784.2
Thr-Met	1	1	18	0	848.175	0.64688	1	28	6.63e-05	5063.49	0.928657	1	23	2.72e-05	2927.5	714.361	0.244017	8929	5909	2195	3221	3919	2201	1490	2619	2932	2212	3064	724	1613	2262	2490	1473	2953.31
Thr-Phe	0.475047	0.709773	24	0	356.382	0.715164	1	26.6465	6.63e-05	3543.24	0.706511	1	25.3233	3.15e-05	2532.15	821.479	0.32442	5528	4505	1938	2202	2740	2117	1689	2067	2404	1589	2553	1145	2559	2565	2759	1667	2501.69
Thr-Pro	0.105571	0.233107	24	3	29406.8	0.286105	0.774122	28	6.01e-05	115747	0.135912	0.336594	26	1.62503	86921.8	3615.13	0.0415906	118767	109512	113448	121262	99210	115705	70616	91874	124016	88181	57483	33128	50426	70287	73650	52089	86853.4
Trp-Lys	0.475047	0.709773	24	0	426.032	0.558198	1	25.7143	6.63e-05	4052.24	0.617153	1	24.8571	3.21e-05	3108.96	845.873	0.272076	5958	4433	2657	3161	3117	2681	2574	3432	2890	2692	2543	1325	2532	3520	3670	2214	3087.44
Tyr-Leu	1	1	18	0	379.363	0.961784	1	27.3065	17.9999	2131.25	0.99926	1	22.6533	18.7929	2211.53	468.31	0.211759	4095	4151	1732	1834	1888	1896	1416	2396	2504	1581	2669	1126	2138	2177	2792	1418	2238.31
Tyr-Ser	0.105571	0.233107	24	3	1105.74	0.656607	1	26.6465	6.00001	3369.5	0.254332	0.530768	25.3233	4.43373	2630.81	657.789	0.250033	2691	3317	3147	3940	2150	4874	3049	3405	5016	1735	1386	738	1905	2028	1584	1397	2647.62
Val-Asp	0.0787266	0.19462	24	3	6531.37	0.157265	0.60856	28	6.63e-05	21985	0.0667529	0.202728	26	1.62503	13871.4	925.938	0.0667516	27413	21685	16066	22776	10457	19124	12984	16470	19417	12511	10486	4530	7109	7470	8821	4904	13888.9
Val-His	0.182589	0.344328	24	6	7323.68	0.245819	0.716295	28	5.48e-05	18543.2	0.184189	0.416252	26	3.25003	12281.9	938.824	0.0764395	25448	17709	15580	15436	16925	16689	10087	16152	22085	11011	5122	2148	5736	4931	7302	4394	12297.2
Val-Lys	0.105571	0.233107	24	6	10174.9	0.118002	0.589446	28	6.58e-05	24887.2	0.0670894	0.20311	26	3.25003	16553.2	2383.38	0.143983	31477	24157	20510	23405	21966	26407	14430	20916	27128	14284	8902	4496	7014	6611	7732	6036	16591.9
Val-Met	0.139706	0.285865	24	3	3748.2	0.54704	1	28	6.63e-05	17692.2	0.272948	0.558502	26	1.62503	8901.1	173.508	0.0194929	33862	19063	5951	11893	8426	8688	4302	9402	12358	5344	5241	1690	3381	4353	5714	2697	8897.81
Val-Phe	1	1	18	0	912.875	0.810121	1	28	6.63e-05	6878.74	0.98071	1	23	2.72e-05	4887.29	792.786	0.162214	10611	8535	4370	3999	5197	4187	3267	5547	5792	3727	4583	2381	4279	3933	5347	2900	4915.94
Val-Pro	0.182589	0.344328	24	6	43862	0.0857731	0.589446	28	6.63e-05	112914	0.0807581	0.231175	26	3.25003	77024.3	10567.5	0.137197	118180	107564	110545	115366	84107	121822	89558	93317	126910	65311	52750	23472	31137	31794	39270	24035	77196.1
beta-Alanine	0.235786	0.416243	24	3	4331.21	0.48897	1	28	6.63e-05	31576	0.364357	0.683873	26	1.62503	24558.8	3724.61	0.151661	39341	27682	24039	35242	21244	29546	21424	25160	28928	22521	19784	11087	18474	26589	24148	16604	24488.3
beta-Hydroxymyristic acid	1	1	18	15	1210.21	0.999444	1	28	12	9168.25	1	1	23	14.5119	8719.28	1929.51	0.221293	11547	7287	8782	13309	8128	7782	8439	7652	8145	10183	11396	6949	7295	8263	6946	7312	8713.44
unknown1000	0.0787266	0.19462	24	3	940.629	0.308833	0.801328	28	6.63e-05	4839.49	0.114679	0.298573	26	1.62503	3048.8	419.805	0.137695	7080	4140	3916	4222	2710	2864	2796	2974	3879	2979	2769	1209	1645	2068	2226	1431	3056.75
unknown1002	0.587657	0.827106	24	6	6726.35	0.298222	0.788197	28	12	20697	0.480459	0.844966	26	8.82142	17200.6	3158.48	0.183626	30915	24181	20295	23682	17071	20475	17887	18672	20900	18059	30145	13684	6226	5663	6219	5691	17485.3
unknown1010	0.873774	1	24	3	290.267	0.904245	1	26.8085	4.14e-05	3953.75	0.976246	1	25.4043	1.58779	3508.36	391.263	0.111523	3953	3489	3836	4537	3202	4665	2947	3494	4122	3217	3308	2029	3088	3485	3554	3104	3501.88
unknown1013	0.380147	0.60181	24	6	1930.58	0.32095	0.817001	28	12	6324.5	0.378673	0.705524	26	8.82143	5376.62	893.858	0.166249	10289	9277	5677	6447	7500	4701	4035	6946	5716	7766	6784	5032	1982	1678	2140	1345	5457.19
unknown1019	1	1	18	15	41343.6	0.997983	1	20	12	199786	0.999998	1	19	13.6167	80755.8	134809	1.66935	212834	18733	107913	10286	7188	48631	2681	19152	1107	688317	7992	101727	4272	21852	14157	4362	79450.2
unknown1023	0.0579045	0.164742	24	3	4928.89	0.17894	0.630663	28	4.95e-05	21543.7	0.0577097	0.184499	26	1.62502	16725.9	1234.74	0.0738218	22161	18888	20698	24428	14896	21163	17381	20124	22038	14293	12133	9603	11983	14900	13830	8722	16702.6
unknown1028	1	1	18	6	275.595	0.807078	1	20	6	1183.25	0.980063	1	19	6.01667	779.561	429.101	0.55044	449	290	748	670	1172	875	2294	392	294	1477	495	534	425	425	573	528	727.562
unknown104	0.587657	0.827106	24	3	379.893	0.701373	1	27.8233	7.51e-05	5474.75	0.777482	1	25.9117	1.61951	4881.49	419.585	0.0859542	4836	5436	5431	6196	4592	5764	4314	4920	5218	4724	4822	3205	4372	4741	4993	4414	4873.62
unknown1045	0.380147	0.60181	24	6	2724.84	0.374861	0.876245	28	12	11551.8	0.420153	0.762946	26	8.82144	9365.09	2170.67	0.231784	16554	12159	9517	11500	11358	9463	10752	10312	11224	9596	17411	7976	3803	4215	4068	3064	9560.75
unknown1048	0.719948	0.96651	24	3	670.691	0.813013	1	25.1282	5.38e-05	7684.25	0.898819	1	24.5641	1.53528	6829.74	905.32	0.132555	7330	7727	7328	8352	6297	8829	5751	7081	7607	6352	6412	3879	5822	7386	7000	5998	6821.94
unknown1050	1	1	18	6	54.8008	1	1	20	6	3833.25	1	1	19	6.01667	3732.5	110.897	0.0297112	5657	4228	2341	2379	6343	2422	2266	4302	3391	3369	6376	1516	3008	4286	5294	2327	3719.06
unknown1053	1	1	18	0	3278.5	0.989864	1	26.4865	6.63e-05	25814.7	0.999948	1	22.2432	2.78e-05	20382.1	3333.29	0.16354	40277	32219	15318	15445	26046	21528	11298	17889	20037	17474	23972	8141	17709	23330	25366	13672	20607.6
unknown1059	0.380147	0.60181	24	0	461.21	0.904289	1	25.7143	6.63e-05	3316.74	0.710834	1	24.8571	3.21e-05	2660.32	611.887	0.230005	4276	3888	2348	2755	2261	2724	1946	2703	3656	2180	2062	895	2657	2963	3461	1541	2644.75
unknown1071	0.122638	0.270153	24	3	2216.07	0.569029	1	25.1282	4.45e-05	17331.5	0.255576	0.531925	24.5641	1.53528	14481.9	3096.45	0.213815	18683	13797	17223	19623	12079	17644	13280	16184	17301	11199	10353	8854	13797	15661	16150	9455	14455.2
unknown1073	1	1	18	0	517.779	0.991441	1	27.1385	17.9999	3113.75	0.999963	1	22.5692	18.7693	3228.73	770.526	0.238647	8659	3796	3175	2170	3651	1854	2391	3054	2285	4233	3352	1335	2499	3530	3906	2520	3275.62
unknown1086	0.301037	0.504016	24	6	5628.04	0.555359	1	28	5.5e-05	29492.7	0.466219	0.825645	26	3.25003	26000.2	2873.44	0.110516	24190	28198	31662	33921	22080	30558	30143	33635	35903	22620	22647	17928	19420	25111	21153	17582	26046.9
unknown1090	1	1	18	15	377.418	1	1	20	12	4184.5	1	1	19	13.6167	3582	813.522	0.227114	6246	4859	2080	2424	2640	3525	3059	3771	3160	4010	6820	2748	2233	3072	4115	2424	3574.12
unknown1096	0.873774	1	24	18	638.341	0.842978	1	28	5.99998	4054	0.961778	1	26	25.5357	4006.41	594.606	0.148414	1880	2755	4304	3131	3522	4657	3871	4166	4135	3290	2327	4733	5661	4211	4773	6123	3971.19
unknown110	0.182589	0.344328	24	6	825.901	0.239062	0.71182	28	12	3567.5	0.180342	0.410216	26	8.82143	3366.34	166.148	0.0493556	4527	4429	4158	4593	3591	3711	2672	3723	3584	3493	4393	2800	1810	2625	2100	1892	3381.31
unknown1104	1	1	18	6	223.799	0.805463	1	20	6.00002	1280.75	0.979715	1	19	6.01667	810.261	504.504	0.622644	446	304	661	606	1522	697	2540	364	294	1202	483	628	660	409	562	608	749.125
unknown1115	0.380147	0.60181	18	0	459.973	0.936095	1	20	17.9999	2069	0.723535	1	19	18.05	1807.15	520.548	0.28805	4237	2273	1446	2149	1082	1619	1144	1385	1518	1833	2856	906	1591	2631	2648	1406	1920.25
unknown1125	1	1	18	15	2048.49	0.999157	1	20	12	11169.8	1	1	19	13.6167	4666.49	7595.15	1.62759	13165	1109	6603	768	392	2758	179	1200	104	38960	601	5014	320	1117	889	308	4592.94
unknown1138	0.380147	0.60181	24	6	278.07	0.935772	1	25.1282	6	3713.25	0.723408	1	24.5641	6.00317	3369.83	400.234	0.11877	2060	3356	4131	3853	3390	4337	3140	3986	3601	3264	3005	4057	3257	2622	2804	3174	3377.31
unknown114	1	1	18	6	310.42	1	1	28	6	4629.25	1	1	23	6.29762	4482.38	139.728	0.0311727	2777	3759	5576	4299	4468	4818	4893	4338	4416	4321	3444	5238	5827	4090	4154	5223	4477.56
unknown1146	0.105571	0.233107	24	18	1444.97	0.569067	1	23.2718	17.9999	9199.49	0.229021	0.487192	23.6359	18.0042	7544.3	1549.6	0.2054	9649	8860	5962	5235	7348	5601	4035	6144	7721	6247	10871	6545	9401	9599	11022	6776	7563.5
unknown1149	0.235786	0.416243	18	0	407.294	0.992504	1	27.1385	17.9999	2153.25	0.573897	0.954557	22.5692	18.7693	2285.75	1113.16	0.487001	9717	1891	1508	2636	1599	1486	755	1469	1583	2493	3145	761	1654	3048	1776	2135	2353.5
unknown1153	0.475047	0.709773	18	0	3874.41	0.924151	1	28	12	20142.2	0.800422	1	23	4.92857	21922.6	6256.05	0.28537	45230	24380	20790	26175	15309	22773	17020	20526	25090	19675	23881	11923	16694	25372	23449	14538	22051.6
unknown1155	0.0579045	0.164742	24	6	3128.95	0.118657	0.589446	28	6.63e-05	9067	0.0410907	0.146655	26	3.25003	6683.04	1534.57	0.229622	9456	7742	8786	10284	6006	10462	7958	9021	9652	5538	4439	2514	3810	4648	4545	2467	6708
unknown1175	0.105571	0.233107	24	21	929.492	0.459728	0.979639	25.8651	17.9999	4419.99	0.195372	0.432501	24.9326	19.5835	3178.65	997.314	0.313754	5182	2768	2211	2449	3646	1796	1453	2501	2532	2206	4180	1648	3937	4781	5116	3846	3140.75
unknown1187	0.0579045	0.164742	24	6	605.46	0.247149	0.716295	28	6.63e-05	4695.75	0.075086	0.21921	26	3.25003	4141.88	80.8611	0.0195228	4112	4400	4752	5519	4223	4763	3914	4670	5004	4257	3886	3705	3318	3338	3464	2924	4140.56
unknown119	1	1	18	6	1552.81	0.996769	1	20	6	16997.8	0.999995	1	19	6.01667	15408	1619.68	0.105119	9279	13018	18541	17558	14326	20384	15640	17641	16359	14968	10860	15484	15577	13848	15146	14759	15211.8
unknown1198	0.182589	0.344328	18	0	14883.4	0.587859	1	24.4321	6.63e-05	116439	0.346889	0.659334	21.2161	2.88e-05	103655	11277	0.108793	113169	111609	120386	120594	85448	112663	89209	105475	119195	92106	92312	77835	103140	124770	118777	92487	104948
unknown1205	0.301037	0.504016	18	3	155.21	0.794076	1	27.1385	5.93e-05	2133.75	0.581145	0.963169	22.5692	1.88079	2246.92	1125.84	0.501061	4062	1094	1411	1968	1952	2094	2569	1138	1114	2587	1877	993	4310	3453	3766	2043	2276.94
unknown1208	0.105571	0.233107	18	15	856.66	0.999994	1	20	12	3833	0.342932	0.654666	19	13.6167	3268.88	1136.67	0.347725	4155	4390	4424	3293	2440	2427	2020	3175	6165	3484	3400	2283	3371	2451	2071	2577	3257.88
unknown1209	1	1	18	0	841.457	0.988689	1	25.8651	6.63e-05	8559.24	0.999936	1	21.9326	2.81e-05	6785.74	1198.93	0.176684	13997	8135	5731	6374	5724	8127	4883	6025	8067	5947	7215	2173	5712	9771	7945	4308	6883.38
unknown1249	0.873774	1	24	18	269.761	0.992237	1	20	12	2816.25	0.990734	1	22	14.85	2668.53	695.186	0.260512	4508	2807	2436	2014	2940	1881	1601	2181	2428	2824	3800	2213	2556	3070	3258	2283	2675
unknown1251	0.0787266	0.19462	24	21	916.764	0.59335	1	24.9858	17.9999	3863.99	0.189828	0.423508	24.4929	19.5381	2736.54	972.016	0.355199	5362	2363	1770	1694	3112	1544	1023	1335	1745	2533	4050	1478	3101	4216	4570	3569	2716.56
unknown1257	0.587657	0.827106	24	18	399.869	0.999752	1	20	17.9999	4750	0.899985	1	22	18.15	4411.57	604.823	0.137099	8228	4089	3723	3641	5900	3618	2516	3405	4121	5001	4613	3509	4551	4952	5395	4102	4460.25
unknown1283	0.235786	0.416243	24	6	4306.1	0.211987	0.678503	28	7.46e-05	9065.73	0.199737	0.439732	26	3.25003	5099.35	10.1439	0.00198924	6178	10148	8735	11202	3808	9786	4859	8053	11406	4018	1022	449	345	478	597	503	5099.19
unknown1292	0.301037	0.504016	24	3	1543.44	0.773418	1	24.8451	6.63e-05	8371.49	0.572164	0.954332	24.4225	1.52644	6874.24	1535	0.223297	9181	6407	7719	10179	5063	8712	7245	8844	9183	5062	4471	3194	6027	7313	7951	3272	6863.94
unknown1297	0.475047	0.709773	24	3	1498.01	0.675835	1	28	6.63e-05	8847.48	0.685817	1	26	1.62503	5752.25	39.3894	0.00684764	14693	9201	5614	5882	6293	7093	3448	5116	5724	4980	7061	1535	2929	5698	4518	2263	5753
unknown1298	0.139706	0.285865	24	21	1536.19	0.099268	0.589446	28	17.9999	5609.73	0.0731993	0.215663	26	19.7321	2857.29	1599.37	0.559752	3922	914	1387	1428	2267	1020	1320	1628	1164	3190	2013	1054	4934	5927	6981	4597	2734.12
unknown131	0.873774	1	18	9	1013.81	0.997881	1	20	5.99999	10199.2	0.991424	1	19	7.6	9346.06	869.852	0.0930715	5715	7562	10416	8537	9362	10512	10289	10634	9563	8966	7159	10904	10957	7902	8165	10158	9175.06
unknown1313	0.475047	0.709773	18	12	448.306	0.998692	1	28	12	2982.75	0.828182	1	23	12.5952	2683.04	554.828	0.206791	7805	3281	1927	2236	2370	3379	1382	2354	3972	3150	3778	1031	1251	2017	1882	884	2668.69
unknown1343	0.873774	1	24	21	550.483	0.993598	1	21.3559	17.9999	3843.25	0.990903	1	22.678	19.4787	3262.32	638.538	0.195731	6383	3326	2486	2350	4516	2022	1456	2125	2556	4194	4462	1560	3055	4085	4740	3493	3300.56
unknown1349	1	1	18	15	492.677	1	1	28	12	4821.75	1	1	23	14.5119	4493.23	1333.85	0.296857	9924	5488	2909	3079	3016	3635	3730	4761	3901	4392	7471	3523	4273	3924	5256	2545	4489.19
unknown1355	1	1	24	6	698.268	0.834846	1	28	6.63e-05	6417.24	0.985542	1	26	3.25003	4909.38	1206.84	0.245823	9457	5139	5844	5229	5172	5283	3404	4958	6095	4645	5643	2248	3644	4309	4017	3149	4889.75
unknown1364	0.587657	0.827106	18	0	712.233	0.813198	1	28	12	3659.5	0.830746	1	23	4.92857	3931.49	1182.48	0.300772	9394	4091	4521	4891	3034	4040	3342	3524	4307	4119	4430	1782	2415	3604	3579	2221	3955.88
unknown1372	0.0787266	0.19462	24	18	20690.8	0.657284	1	28	17.9999	78275.1	0.204986	0.447666	26	18.1071	48316.8	15518.9	0.321189	62164	30540	24947	17595	79993	15781	13037	25600	23836	35239	88264	29773	65798	104515	97176	45612	47491.9
unknown1373	0.0579045	0.164742	24	3	24319.5	0.311952	0.806076	28	6.63e-05	196127	0.0905676	0.248793	26	1.62503	157860	24925.8	0.157898	229797	168832	167433	218445	138688	176221	158108	160403	165047	141890	140425	87888	123653	175939	155787	109654	157388
unknown1389	0.105571	0.233107	24	18	1866.59	0.729959	1	22.4427	17.9999	11015	0.274584	0.560868	23.2214	18.0202	8841.51	2098.82	0.237382	14036	7022	7511	6878	8996	6684	4474	5249	8092	8612	13673	7107	8562	13450	13933	8115	8899.62
unknown1391	0.105571	0.233107	24	6	32876.6	0.182203	0.634867	28	7.04e-05	99235.6	0.0952341	0.259315	26	3.25003	67552.5	850.058	0.0125837	119481	79328	112801	85333	64258	92894	65552	89845	107411	60536	44430	20696	30891	42271	39059	25832	67538.6
unknown1409	0.380147	0.60181	18	0	1765.12	0.999444	1	20	12	13971.2	0.74762	1	19	15.2	13219.4	2483.84	0.187894	20081	13285	13785	15992	12813	13328	7975	11333	18349	14767	13108	9661	12825	13826	13382	11028	13471.1
unknown1413	0.105571	0.233107	24	3	846.76	0.359346	0.860214	28	4.31e-05	3925	0.162058	0.378459	26	1.62502	3013.95	320.77	0.106429	4416	3113	3546	4625	3789	3798	2479	3041	3622	3456	2093	1058	1615	2607	2585	2283	3007.88
unknown1419	0.0787266	0.19462	24	3	3002.91	0.0624098	0.589446	28	4.11e-05	5952.99	0.0310315	0.124423	26	1.62502	3111.53	1.77824	0.0005715	7685	4830	4511	6786	3031	4505	4346	4627	5335	2204	909	188	170	228	176	253	3111.5
unknown1425	1	1	18	9	214.253	1	1	28	17.9999	7746.5	1	1	23	13.1428	7545.69	107.299	0.0142199	7198	4899	9206	7865	8067	9548	6174	5925	4982	10448	7853	7546	7433	7370	7817	8366	7543.56
unknown1432	0.0579045	0.164742	24	6	55666.3	0.113429	0.589446	28	6.63e-05	124389	0.0395759	0.143636	26	3.25003	65731.7	15948.3	0.242628	143155	120123	87424	146857	79070	118286	49207	69716	115055	63576	40024	5773	3204	2307	2291	1489	65472.3
unknown1438	1	1	18	9	504.344	0.999883	1	28	6.00002	5285.5	1	1	23	8.21429	5027.02	291.585	0.0580035	3219	4562	5442	4754	4141	5765	5554	5682	6318	3935	4385	5908	5820	5096	5506	4133	5013.75
unknown1447	0.0579045	0.164742	24	15	1029.9	0.314052	0.810093	27.3065	12	5894.75	0.0910554	0.249642	25.6533	13.6534	4985.76	825.468	0.165565	2492	3791	5554	3452	4687	5070	4103	4246	5258	4658	5390	8273	6033	5168	5692	6319	5011.62
unknown1448	0.139706	0.285865	24	6	930.199	0.37912	0.881014	27.1385	6.00001	5049	0.208584	0.452689	25.5692	6.02269	4315.37	759.151	0.175918	2913	4926	5502	5247	4408	5842	5091	4855	6047	4247	4064	3643	3238	2979	3366	3322	4355.62
unknown1454	0.719948	0.96651	24	21	704.985	0.998691	1	20	18	4511	0.956196	1	22	19.525	4058.02	872.954	0.215118	9947	4420	2250	3481	4270	3104	2180	3040	3116	4214	6283	1869	3897	4842	5347	3958	4138.62
unknown1458	0.301037	0.504016	24	3	1349.51	0.294643	0.783188	28	6.63e-05	4707.99	0.303571	0.603897	26	1.62503	3242.55	482.623	0.148841	5976	3061	4413	5382	4161	3984	2781	3472	4449	4246	2290	1003	1367	2110	2022	1310	3251.69
unknown1462	0.105571	0.233107	24	6	5537.71	0.0872241	0.589446	28	6.63e-05	15612	0.0523736	0.173234	26	3.25003	9562.83	2011.04	0.210298	19217	12836	13358	17037	8820	14872	10656	11313	13113	10077	11720	5505	1010	1175	1134	639	9530.12
unknown1489	1	1	18	12	561.443	0.999998	1	20	12	15083.2	1	1	19	12.0333	14347.5	787.478	0.0548862	9989	14812	16493	14018	11363	16347	14052	15082	17924	11764	13990	16655	14799	12286	12833	15664	14254.4
unknown149	1	1	18	9	496.743	0.831554	1	28	17.9999	8761.5	0.984942	1	23	13.1428	8319.72	292.212	0.0351228	6017	7284	8865	7857	8051	8965	7426	8672	8540	7972	8030	10298	8845	8020	8797	9384	8313.94
unknown1492	1	1	24	6	348.25	0.924537	1	28	6.63e-05	3503.75	0.997078	1	26	3.25003	2816.31	438.028	0.155532	5077	2669	3034	3235	3482	2722	2180	2691	2790	3829	2552	1375	2214	2312	2792	1993	2809.19
unknown1504	0.0787266	0.19462	24	6	1692.99	0.127363	0.589446	28	5.64e-05	5822.5	0.0561752	0.181045	26	3.25003	4224.72	274.483	0.0649708	5827	5086	5535	6842	4001	6196	4186	5188	5780	3712	3180	1653	2257	2925	3177	2122	4229.19
unknown1511	0.587657	0.827106	24	0	507.349	0.899165	1	25.5652	17.9999	2101.25	0.865468	1	24.7826	21.1158	2037.9	538.003	0.263998	2431	1611	2427	4216	829	1600	1806	2305	1389	1778	2127	1374	956	1719	2672	3058	2018.62
unknown1519	0.0787266	0.19462	24	3	1966.46	0.257099	0.730715	28	6.63e-05	13064	0.0991799	0.267968	26	1.62503	9069.98	814.257	0.0897749	16975	11138	9829	14314	6712	9044	8106	9627	10203	6992	7266	5447	5062	9218	8978	5962	9054.56
unknown1530	0.105571	0.233107	24	0	16648.1	0.355739	0.857399	26.3284	6.63e-05	159356	0.160811	0.376213	25.1642	3.17e-05	123157	31285.9	0.254032	223679	154672	138760	120316	124730	100321	94378	131339	124293	88407	113373	66369	119827	124076	121409	107903	122116
unknown1565	1	1	24	18	2096.22	0.997419	1	25.2722	18	15993.2	0.999997	1	24.6361	18.012	13294.3	2170.23	0.163246	18428	18019	5461	7869	16580	12553	5917	8455	15936	7561	21777	9504	13634	18575	20901	10863	13252.1
unknown1572	0.0579045	0.164742	24	3	2785.29	0.12753	0.589446	28	7.7e-05	10021.7	0.0436307	0.152598	26	1.62504	7015.16	483.752	0.0689581	10118	9099	8973	11897	6839	10603	6282	7944	9194	6031	5460	2454	3331	5097	5348	3426	7006
unknown1577	0.235786	0.416243	24	3	683.949	0.349885	0.852767	28	6.63e-05	4183.74	0.288329	0.579774	26	1.62503	2650.61	109.89	0.0414586	6279	3548	3263	3645	2587	2287	2191	2341	2903	2512	2588	982	1522	2171	2289	1335	2652.69
unknown1589	0.105571	0.233107	24	21	489.141	0.730414	1	24.2975	17.9999	2422.99	0.274707	0.560868	24.1488	19.5099	1590.86	976.985	0.614125	4251	1738	1299	952	973	806	868	901	815	1522	1187	351	1044	2834	4679	1135	1584.69
unknown159	1	1	18	6	1845.55	0.999999	1	20	6	16797.8	1	1	19	6.01667	15342.4	1501.37	0.0978577	6977	13477	19525	17835	11470	20749	16177	18795	16560	11312	8376	19416	15946	13899	15188	16865	15160.4
unknown1594	0.139706	0.285865	24	0	4112.36	0.677709	1	24.0327	6.63e-05	15311.7	0.317865	0.622046	24.0163	3.31e-05	12616.4	4312.87	0.341847	21043	17141	10640	12423	9410	9671	9656	11492	8249	8476	16893	6375	13979	21037	17308	8032	12614.1
unknown1603	0.139706	0.285865	24	3	2121.32	0.32993	0.82809	28	6.63e-05	15634	0.187927	0.422351	26	1.62503	10802.6	1155.49	0.106965	21778	13531	10447	16780	7878	10333	9352	11744	11624	9022	8698	5862	6774	10572	10690	7406	10780.7
unknown1605	1	1	18	0	724.784	0.999339	1	28	6.63e-05	29959.4	1	1	23	2.72e-05	12593.7	3003.24	0.238472	112180	2052	4078	1528	1413	1981	1048	36156	1803	30314	1736	2683	1427	2391	1386	1059	12702.2
unknown1630	0.873774	1	24	21	742.285	0.952484	1	20	17.9999	4780.25	0.985071	1	22	19.525	4206.34	845.087	0.200908	8245	4144	4182	3408	3908	1950	2560	4220	3428	5023	5713	2648	3663	5702	5772	3984	4284.38
unknown1633	0.0787266	0.19462	24	3	781.353	0.467211	0.988617	28	6.2e-05	4122	0.158263	0.371237	26	1.62503	3391.2	538.894	0.158909	4572	3369	4050	4497	3063	3874	3416	4248	4372	3013	2281	1874	2777	3395	3388	1907	3381
unknown1641	0.182589	0.344328	24	3	1146.04	0.475211	0.99648	28	5.62e-05	3690.75	0.298874	0.595765	26	1.62503	2585.56	128.649	0.0497566	4696	1914	4744	3409	4620	2612	1831	3337	4088	3071	849	1072	840	1579	1842	904	2588
unknown1645	0.0787266	0.19462	24	18	15706.8	0.210075	0.67679	27.1385	17.9999	65650.8	0.0843804	0.237644	25.5692	18.068	37315.7	21020.9	0.563325	71786	15198	20460	18232	29962	19772	17892	19787	32451	30388	26256	17616	53257	81210	75333	52804	36400.2
unknown1648	0.235786	0.416243	24	6	3632.76	0.119078	0.589446	28	12	9688	0.128391	0.322306	26	8.82143	7796.03	2388.33	0.306352	16944	10252	9949	12489	8855	10883	8596	9765	9773	9260	12403	7316	566	451	382	297	8011.31
unknown1662	1	1	18	3	1547.33	0.982286	1	20	6	12991.8	0.999842	1	19	4.43333	12463.9	1514.63	0.121522	13556	15344	12298	10646	13212	12852	11878	14025	10056	8693	16375	7021	11684	14885	15475	11099	12443.7
unknown167	0.0787266	0.19462	24	6	1130.31	0.140987	0.596796	28	6.63e-05	5601.25	0.0610563	0.192118	26	3.25003	4557.66	132.736	0.0291238	5434	5729	5335	5907	4279	6014	4382	5272	5655	4337	5042	3256	2833	3248	3446	2719	4555.5
unknown168	0.105571	0.233107	24	6	4758.12	0.201179	0.662917	28	6.63e-05	29480.7	0.103048	0.27496	26	3.25003	23662.7	1708.22	0.0721906	33790	26392	25632	32109	25023	30536	20778	23064	28394	21705	20910	19412	15535	19263	20071	15544	23634.9
unknown1680	0.475047	0.709773	18	12	329.689	0.947071	1	25.8651	12	5550.25	0.809251	1	21.9326	12.3986	4675.51	1401.12	0.299672	5525	5630	4295	2706	7649	5269	2850	4386	5290	4974	8209	3728	3125	2774	4369	2815	4599.62
unknown1688	0.105571	0.233107	24	3	3513.61	0.23331	0.704279	28	6.63e-05	23003.7	0.115857	0.301077	26	1.62503	15864.7	1275.04	0.0803694	30347	22412	16651	22605	11634	14430	13951	18071	17854	12866	12929	8796	9845	14705	14655	11698	15840.6
unknown1695	0.0579045	0.164742	24	6	2210.95	0.109176	0.589446	28	5.55e-05	6250.49	0.0383337	0.141147	26	3.25003	4048.06	349.959	0.086451	7397	4981	4693	7931	5039	6811	3998	4083	5529	3839	2391	1166	1644	2009	2216	1133	4053.75
unknown1696	0.0579045	0.164742	24	6	5278.02	0.172936	0.622042	28	6.63e-05	13090.5	0.0561151	0.181045	26	3.25003	7392.66	985.831	0.133353	19501	10953	10536	11372	7191	12577	8294	8076	14442	5577	4039	1438	871	1183	1315	661	7376.62
unknown1699	0.0787266	0.19462	24	3	764.736	0.302837	0.796822	28	6.63e-05	5512.74	0.112921	0.295095	26	1.62503	3992.81	217.551	0.0544858	6937	4854	4206	6054	3047	4075	3493	4349	4490	3393	3478	2361	2422	3762	4115	2783	3988.69
unknown1709	0.475047	0.709773	24	6	964.317	0.715748	1	28	12	4105.5	0.706811	1	26	8.82143	4208.19	159.555	0.0379153	10150	4528	4089	5502	5340	4000	3275	3729	5148	4899	3042	3333	2393	3363	2060	2250	4193.81
unknown1714	0.380147	0.60181	24	18	1303.37	0.965436	1	24.4321	17.9999	11419.2	0.734886	1	24.2161	18.0014	9829.4	1115.78	0.113515	12168	11314	6796	6178	11989	7030	6612	7589	8931	7872	16392	8599	11750	12287	12121	9519	9821.69
unknown1730	0.139706	0.285865	24	18	3594.93	0.774351	1	23.7736	17.9999	17797	0.348772	0.661292	23.8868	18.0004	13668.6	3664.75	0.268115	21668	12649	8239	9532	9415	13555	6106	8882	16350	8998	22247	10088	14126	22170	23333	11559	13682.3
unknown1744	0.0787266	0.19462	24	3	2370.22	0.616634	1	28	6.63e-05	12729.2	0.195408	0.432501	26	1.62503	9105.06	845.045	0.0928105	17190	11703	10357	11667	7633	10682	7617	9334	14377	7350	7623	4273	5489	8625	6764	5253	9121.06
unknown1752	0.380147	0.60181	24	18	701.803	0.63193	1	28	17.9999	6533.5	0.582831	0.964817	26	18.1071	5670.27	75.5945	0.0133317	2930	5000	5984	5232	5945	5357	4136	5602	5309	5743	5260	8028	6908	5949	5790	7487	5666.25
unknown1772	0.182589	0.344328	24	21	536.694	0.886967	1	23.1496	17.9999	3680.5	0.456775	0.813048	23.5748	19.4792	2984.37	643.614	0.215662	5358	2521	2208	2489	2832	1690	2163	2218	2215	2679	4639	2207	3227	4051	4755	2689	2996.31
unknown1786	0.475047	0.709773	24	6	424.794	0.981439	1	27.4766	6.63e-05	3714.5	0.821999	1	25.7383	3.21732	3359.29	317.714	0.0945777	3511	4467	3414	3466	5382	3645	2026	3478	3325	2694	3495	2942	3841	2664	2864	2598	3363.25
unknown1795	0.475047	0.709773	18	0	522.552	0.767742	1	20	17.9999	4067.5	0.732579	1	19	18.05	3550.24	572.771	0.161333	5338	4892	3138	3035	3258	3123	2007	2987	4490	2956	4082	3219	4231	3944	5064	3031	3674.69
unknown1809	1	1	18	12	1559.52	0.998789	1	21.7778	12	25078	0.999999	1	19.8889	12.1092	23864.1	837.535	0.035096	16810	23844	25360	25468	20984	27479	18103	23956	26093	21087	24199	28933	24998	22353	25422	25352	23777.6
unknown1872	0.0579045	0.164742	24	3	2567.5	0.215785	0.68516	28	5.42e-05	9162.99	0.0672531	0.203142	26	1.62503	5902.98	1309.48	0.221833	15276	6699	6742	7935	6443	6465	6176	9067	7389	4658	3803	860	3332	2809	3326	3071	5878.19
unknown189	0.139706	0.285865	24	0	461.034	0.760942	1	24.5682	6.63e-05	5969.24	0.344589	0.656932	24.2841	3.28e-05	5358.43	733.737	0.136931	7517	5226	5229	5905	5796	5222	4018	4973	5134	5028	5166	4073	5659	6616	5213	4854	5351.81
unknown1896	0.139706	0.285865	24	3	5568.29	0.141538	0.596796	28	7.31e-05	13026.5	0.0973542	0.263546	26	1.62503	7979.02	1160.54	0.145449	15275	12588	10676	13567	10102	13007	7319	9122	13817	9706	2862	995	1650	2781	2454	2095	8001
unknown1899	0.0787266	0.19462	24	3	1555.99	0.229233	0.700313	28	6.63e-05	5755.74	0.0905005	0.248793	26	1.62503	3505.8	405.134	0.115561	8329	5063	3550	6081	3515	5046	2182	3890	4434	2918	2483	559	1699	2218	2573	1430	3498.12
unknown1905	0.0787266	0.19462	24	3	657.963	0.641893	1	28	6.63e-05	5632.98	0.201384	0.441565	26	1.62503	3348.45	571.439	0.170658	10801	4973	3670	3088	3493	2288	1975	3356	2820	3067	2357	1345	2194	2912	3233	1830	3337.62
unknown1911	0.0787266	0.19462	24	6	2748.17	0.283826	0.772084	26.3284	6	8769.25	0.10728	0.283623	25.1642	6.01287	6751.74	1320.51	0.19558	6947	7555	8794	9365	5641	9315	8731	11390	10235	5366	5366	2847	3510	6179	4213	3399	6803.31
unknown1918	1	1	24	6	579.651	0.997011	1	28	6.63e-05	5248.75	0.999996	1	26	3.25003	4762.02	108.988	0.0228869	7303	5474	4368	3850	6848	6454	2853	3990	6045	3949	6552	3426	3608	3971	4470	3003	4760.25
unknown192	0.0579045	0.164742	24	3	1380.63	0.132231	0.592036	28	6.63e-05	6039.74	0.0449618	0.155693	26	1.62503	4298.47	147.117	0.0342255	7334	5568	4845	6412	3992	5615	3897	4653	4958	4152	3503	2063	2299	3382	3493	2565	4295.69
unknown193	0.0787266	0.19462	24	6	2606.04	0.160022	0.61181	28	5.29e-05	13375.5	0.0677043	0.204063	26	3.25002	10676	377.38	0.0353483	15807	11867	11931	13897	12781	13166	9167	11441	12415	10039	9083	5919	7307	8983	8364	8748	10682.2
unknown1943	0.235786	0.416243	24	21	415.248	0.76395	1	23.2718	17.9999	1583	0.488885	0.855621	23.6359	19.4815	1167.6	526.168	0.45064	3069	1369	717	706	779	672	453	805	718	1147	1405	643	992	2039	2096	1205	1175.94
unknown1967	0.105571	0.233107	24	3	633.037	0.415192	0.932814	28	6.63e-05	3809.49	0.180912	0.411113	26	1.62503	2640.33	60.3258	0.0228478	5701	2846	3105	3586	2217	2707	2659	2856	3254	1955	2319	1468	1449	2805	2066	1234	2639.19
unknown197	0.139706	0.285865	24	3	1333.25	0.651637	1	28	6.63e-05	6679.23	0.309208	0.60993	26	1.62503	3685.81	178.255	0.0483623	13559	5748	3306	4104	2832	3858	2550	4424	4612	2677	2738	1405	2158	1678	1959	1419	3689.19
unknown1976	0.105571	0.233107	24	6	6199.56	0.217857	0.688099	28	6.63e-05	26883.7	0.109759	0.288896	26	3.25003	19119.3	5085.27	0.265976	33325	22997	23923	27290	14320	24478	18178	20818	21607	18383	22575	13885	10076	10434	13408	8888	19036.6
unknown1982	1	1	18	3	258.978	1	1	28	6	2654	1	1	23	4.38095	2723.76	22.7525	0.00835335	4130	2527	1809	1707	4686	1658	1542	2730	1309	2401	5769	1088	2948	2284	4884	2103	2723.44
unknown1984	0.531352	0.792626	24	0	304.056	0.66596	1	28	6.63e-05	2062.24	0.721468	1	26	3.08e-05	1094.66	599.465	0.547626	1295	3829	532	2593	549	1056	381	869	1387	562	418	324	621	996	1230	381	1063.94
unknown1988	0.105571	0.233107	24	21	512.476	0.314507	0.810516	25.7143	17.9999	2602.24	0.146262	0.35432	24.8571	19.575	1827.33	633.14	0.346484	3237	1578	1168	1339	1592	1161	986	1475	1109	1459	1853	1516	2173	3173	2864	2199	1805.12
unknown199	0.0579045	0.164742	24	3	858.251	0.322751	0.817001	28	4.58e-05	5130	0.0930669	0.254407	26	1.62502	4287.79	368.272	0.0858887	4428	5303	5099	5690	4833	5084	3411	4781	4492	4649	3457	2726	3114	3315	4552	3559	4280.81
unknown2028	0.587657	0.827106	24	6	7592.21	0.504628	1	28	12	19144.8	0.657016	1	26	8.82143	21621.7	4547.2	0.210307	31879	52767	17683	52949	17983	28208	7324	16197	28751	17003	18388	12437	7350	10977	12351	7142	21211.8
unknown203	0.182589	0.344328	18	12	507.349	0.972721	1	28	12	4610.5	0.484546	0.850011	23	12.5952	3408.08	1791.23	0.525584	6449	3953	3081	3613	4572	2660	2090	3265	3105	5363	7154	2820	1247	1496	1463	1457	3361.75
unknown2033	0.235786	0.416243	24	3	956.715	0.391124	0.897719	28	6.63e-05	4994.99	0.312038	0.613308	26	1.62503	3377.28	219.653	0.0650386	6254	3734	4059	5933	2782	4897	2656	2577	4371	2551	3080	1958	1742	2700	2101	2708	3381.44
unknown2057	0.0579045	0.164742	18	0	5733.05	0.636023	1	26.1721	17.9999	14921.5	0.158418	0.371237	22.0861	18.6379	14457.9	5260.14	0.363824	18494	31267	11369	26010	14164	15015	5420	6760	17776	10410	9597	12275	15265	16550	16626	11245	14890.2
unknown2060	0.182589	0.344328	24	6	21781	0.435146	0.954969	28	6.63e-05	150983	0.280674	0.568669	26	3.25003	133627	4070.62	0.0304625	118661	166795	161204	157271	148377	185420	111229	131366	172287	141895	143965	116206	110013	92472	89598	90218	133561
unknown2090	0.475047	0.709773	24	3	731.856	0.982068	1	28	6.63e-05	4908.49	0.822227	1	26	1.62503	3753.92	321.035	0.0855199	7352	5551	3504	3227	3192	4445	2693	4351	6632	2534	3083	1974	2700	3666	3363	1893	3760
unknown21	0.139706	0.285865	24	9	62629.2	0.0913798	0.589446	28	12	327959	0.0684396	0.205613	26	10.4464	264217	86720.8	0.328219	285280	266152	342662	370389	298498	337436	301344	332675	322057	330446	388364	270968	114280	123835	116536	144161	271568
unknown2103	0.235786	0.416243	18	15	1019.65	0.729085	1	20	12	7897.5	0.474603	0.838366	19	13.6167	5499.38	2478.45	0.450679	7736	4032	4064	4981	6214	4193	2953	4270	5483	6654	12814	6639	4048	4653	4037	4835	5475.38
unknown2119	1	1	24	18	1550.86	0.998403	1	25.4179	12	8262.75	0.999999	1	24.7089	15.0985	6253.72	1202.49	0.192284	7041	2529	2830	2705	13281	2664	4095	5686	1627	5543	20872	5009	8088	5627	6499	5976	6254.5
unknown2135	0.873774	1	18	15	1663.12	0.940117	1	28	12	5271.5	0.983016	1	23	14.5119	5048.5	2579.6	0.510965	5877	10776	4648	9896	3821	6571	1712	3441	7613	5603	4471	3399	2562	3597	4318	2346	5040.69
unknown215	0.587657	0.827106	24	0	6171.45	0.804035	1	26.8085	6.63e-05	55333.4	0.826739	1	25.4043	3.14e-05	41071.5	11073.8	0.269622	41076	85597	29913	64748	33468	43911	25354	36517	45438	29870	26849	31324	35420	40372	52996	27391	40640.2
unknown2157	1	1	24	0	6335.5	0.999045	1	24.7059	17.9999	48396	1	1	24.3529	21.0479	39970.3	6026.48	0.150774	53700	14159	28314	62747	35913	12754	33523	46822	13865	44801	57644	40130	23632	43558	58333	68061	39872.2
unknown2172	0.873774	1	24	0	4811.51	0.959375	1	24.1644	6.63e-05	22362.5	0.986155	1	24.0822	3.3e-05	18294.5	5657.58	0.309251	30757	10639	14602	33452	13213	7708	15944	24983	7694	18282	19409	12585	12822	19832	27864	22684	18279.4
unknown2181	0.105571	0.233107	24	21	582.302	0.864762	1	20.3695	17.9999	2421.75	0.30982	0.61067	22.1848	19.5078	1889.69	567.551	0.300341	2473	908	1748	3895	1503	746	1201	1306	977	1661	3288	1600	1690	1804	2689	3504	1937.06
unknown2222	0.301037	0.504016	18	0	841.104	0.858844	1	26.4865	17.9999	2922	0.608274	0.99923	22.2432	18.6798	2903.97	844.807	0.290915	6409	4766	3223	2067	2806	2672	1253	2285	1173	2853	3084	3201	3355	3018	2777	2538	2967.5
unknown2228	0.587657	0.827106	24	0	285.848	0.92156	1	22.1053	5.6e-05	1387.25	0.8737	1	23.0526	2.92e-05	1136.6	340.203	0.299316	1607	593	1196	2153	661	745	1373	1564	349	1205	1162	598	1210	1129	1396	1430	1148.19
unknown226	0.587657	0.827106	18	3	562.857	0.999999	1	21.8859	17.9999	7727.5	0.900062	1	19.9429	19.8344	6986.31	443.341	0.0634584	7925	8354	5404	6982	6986	7571	3253	7042	6232	4504	14208	3667	7078	7631	8241	7960	7064.88
unknown233	0.719948	0.96651	24	6	1773.78	0.878896	1	20	6	27807	0.922351	1	22	6.05	25522.6	1692.66	0.0663201	20215	23901	29702	28165	26185	29605	26054	29384	26566	27326	22033	19630	23994	23851	24592	25479	25417.6
unknown236	0.182589	0.344328	24	6	1618.92	0.245582	0.716295	28	6.63e-05	6439.75	0.184054	0.416252	26	3.25003	5157.88	241.645	0.0468497	8783	4466	5686	6824	7592	6139	5652	5098	6131	7053	6122	2730	2625	2820	2703	2165	5161.81
unknown24	0.0579045	0.164742	24	6	1934.29	0.319951	0.816256	28	6.63e-05	5560.24	0.092421	0.252889	26	3.25003	2890.84	820.23	0.283734	10601	5094	2644	3902	2924	3480	2232	4304	3972	2512	1025	633	626	788	523	780	2877.5
unknown240	1	1	18	6	342.416	1	1	20	17.9999	5629	1	1	19	2.21664	5512.1	47.6555	0.00864561	12375	4708	3758	2199	6183	4465	6502	3363	2778	10977	6371	2103	6145	6472	7670	2229	5518.62
unknown256	0.475047	0.709773	24	15	360.271	0.608965	1	28	17.9999	5812.25	0.6481	1	26	16.4821	5419.01	152.53	0.0281471	3681	4638	5696	5272	5381	5637	4959	5406	5394	5449	5312	6682	6092	5351	5912	5894	5422.25
unknown262	1	1	24	0	1057.48	0.998523	1	23.52	6.63e-05	6478.99	0.999999	1	23.76	3.35e-05	5736.62	1125.26	0.196154	8078	3066	5724	9048	4406	2759	5344	8968	3185	5246	5946	5097	4920	5377	7848	6919	5745.69
unknown277	0.105571	0.233107	24	3	2939.44	0.147787	0.602151	28	6.63e-05	7050.25	0.0805117	0.230707	26	1.62503	4732.68	174.468	0.0368645	8448	5514	6088	8151	5854	8229	4926	5728	8369	3977	1939	1038	1989	1858	2213	1349	4729.38
unknown284	0.0787266	0.19462	24	3	14482.3	0.213033	0.679514	28	6.63e-05	36791.5	0.085334	0.239364	26	1.62503	25300	272.594	0.0107745	35692	31529	39660	40285	28293	45200	27076	28741	47730	22526	9099	6210	10997	11308	12225	8311	25305.1
unknown285	0.587657	0.827106	18	15	1145.87	0.964654	1	28	12	5541.25	0.888649	1	23	14.5119	5438.15	2466.35	0.453526	14947	6143	5844	6323	5119	5118	2542	4485	5471	7378	6739	2577	3359	4015	3127	3704	5430.69
unknown291	0.139706	0.285865	24	6	795.495	0.252558	0.727979	28	6.75e-05	3240.5	0.153285	0.362529	26	3.25003	2368.76	96.8437	0.0408837	4716	2123	3176	2947	2953	2624	2501	2605	2193	2788	2861	1126	1371	1373	1555	963	2367.19
unknown296	0.105571	0.233107	24	6	723.37	0.297171	0.786164	28	6.63e-05	5956.5	0.139979	0.343738	26	3.25003	5187.76	223.458	0.0430742	4771	6347	6228	6480	5255	6046	4429	6129	5925	5450	5406	4410	4149	3888	4184	3849	5184.12
unknown299	1	1	24	12	1254.05	0.999996	1	28	12	7362	1	1	26	12.0714	6220.57	1432.39	0.230266	7779	16595	2990	3304	11216	6293	1114	6485	9519	3690	12415	3824	3905	3323	5591	3010	6315.81
unknown322	0.301037	0.504016	24	12	632.153	0.531268	1	23.6461	12	4278.5	0.453088	0.809582	23.8231	12.0007	3749.5	748.856	0.199721	2810	3360	4076	3324	4551	3733	3255	4579	3887	4421	4537	4269	4396	2875	2460	3390	3745.19
unknown329	0.0787266	0.19462	24	3	2458.26	0.364785	0.86354	28	4.15e-05	16048.7	0.130674	0.325346	26	1.62502	13433.9	1139.29	0.0848066	13646	15989	16171	18389	15171	15739	11029	14528	14347	14467	11149	8124	9337	10574	13843	12095	13412.4
unknown337	1	1	24	18	250.316	0.99933	1	25.8651	17.9999	2200.5	1	1	24.9326	18.0252	1884.94	230.556	0.122315	2210	799	1410	2576	1498	874	1803	2278	1064	1843	2790	2110	1237	1843	2491	3231	1878.56
unknown360	0.587657	0.827106	18	15	720.365	0.998449	1	20	12	4364.25	0.899577	1	19	13.6167	3315.61	1463.76	0.441476	2088	2853	2524	5777	1325	2522	2538	1407	1252	10134	3137	2934	2539	8230	1560	2003	3301.44
unknown362	1	1	24	0	910.93	0.99635	1	24.9858	6.63e-05	10050.7	0.999993	1	24.4929	3.25e-05	9466.19	2660.42	0.281044	5244	7526	9418	18015	5546	8300	6027	12081	8902	4902	8172	9956	9526	7859	9002	20333	9425.56
unknown372	0.139706	0.285865	24	3	1860.04	0.483103	1	28	6.63e-05	9927.48	0.249435	0.521087	26	1.62503	7162.93	339.539	0.0474022	11647	9364	8091	10608	7036	7986	6023	7289	9020	7343	6709	1498	3853	6666	7974	3397	7156.5
unknown374	0.0787266	0.19462	24	6	4036.7	0.0885064	0.589446	28	4.18e-05	10719.2	0.0415731	0.147018	26	3.25002	6939.71	159.939	0.023047	13717	6516	9896	12748	8591	8026	9091	8896	7436	9138	6994	2032	2093	1822	2230	1851	6942.31
unknown377	0.105571	0.233107	24	6	1700.59	0.0779736	0.589446	28	6.63e-05	4671.5	0.047742	0.161317	26	3.25003	3334.29	712.49	0.213686	4459	4667	4204	5356	3238	5641	3951	4097	4700	3130	2143	1274	1702	1536	1870	1566	3345.88
unknown392	0.182589	0.344328	24	6	1051.82	0.144039	0.597406	28	12	3263.75	0.121984	0.311488	26	8.82141	2974.32	345.194	0.116058	5015	3515	4055	4576	3847	3307	2644	3056	3276	3482	3729	2568	955	1697	1168	1197	3005.44
unknown395	0.719948	0.96651	24	3	1090.18	0.877739	1	27.6489	5.09e-05	16459.5	0.921969	1	25.8245	1.61405	14905	1260.2	0.0845489	14598	15716	16422	19102	14030	19087	13109	14869	16362	13832	14809	10107	12966	14679	15110	13308	14881.6
unknown4	1	1	18	9	128.87	1	1	28	17.9999	2525.25	1	1	23	13.1428	2410.15	36.4977	0.0151433	3013	1831	2154	2218	2088	2431	2670	2405	2228	2492	3070	1873	2285	2665	2628	2523	2410.88
unknown403	0.0787266	0.19462	18	12	676.348	0.409187	0.927863	27.4766	12	33623.5	0.14288	0.348278	22.7383	12.5447	23916.3	16273.5	0.680433	23445	31194	27179	22955	30065	30790	21928	25873	28119	22969	26846	56560	10497	4337	4842	6526	23382.8
unknown404	0.105571	0.233107	24	3	1584.27	0.16504	0.616258	28	4.24e-05	8552.25	0.0879871	0.245327	26	1.62502	6866.6	259.418	0.0377797	8476	7163	8547	10023	7083	8825	6361	7417	7815	7377	5406	4119	4844	5401	5676	5254	6861.69
unknown427	0.301037	0.504016	24	18	441.765	0.755985	1	26.9725	17.9999	2595.75	0.564456	0.948135	25.4862	18.0614	1958.19	486.854	0.248625	2681	1826	1225	1328	2335	1291	1079	1368	1357	2053	2822	1259	2177	3035	3468	1703	1937.94
unknown433	0.719948	0.96651	24	6	679.883	0.947775	1	20.9501	6	5601	0.943152	1	22.4751	6.02775	4875.49	570.922	0.1171	3017	4047	6716	5954	4729	6671	5392	5612	5394	4249	3077	5290	4703	3919	4141	4659	4848.12
unknown435	0.719948	0.96651	24	6	6279.11	0.305052	0.799435	28	12	25488.2	0.552534	0.936322	26	8.82142	19553.6	5369.38	0.274598	29667	22574	23865	29029	23706	22973	19538	20861	19999	24863	37025	20066	7019	5967	6049	7400	20037.6
unknown44	1	1	18	9	451.134	0.988033	1	26.3284	6	8324.25	0.999928	1	22.1642	8.06655	7916.23	577.066	0.0728965	4867	6030	9357	7885	8129	8196	8352	8620	8516	8530	6840	9006	8706	6728	7724	8411	7868.56
unknown441	0.105571	0.233107	24	0	16289.6	0.316542	0.812369	26.6465	6.63e-05	131623	0.146993	0.354523	25.3233	3.15e-05	106590	20486.7	0.1922	149273	133299	114214	129707	86435	102515	105522	104150	120301	82772	92028	65371	84028	125429	115837	82411	105831
unknown446	0.719948	0.96651	24	18	430.805	0.997359	1	28	6.00003	3740	0.955879	1	26	25.5357	3770.55	260.305	0.0690363	2595	3952	3104	2815	5896	3087	2274	3703	4298	3141	4169	3044	4487	3495	3525	6497	3755.12
unknown456	0.0579045	0.164742	24	21	481.009	0.878089	1	20	18	3251.25	0.202312	0.443212	22	19.525	2918.52	564.319	0.193358	5528	3555	2678	2247	2596	2007	1992	2617	2968	2657	3554	2126	3073	3467	3665	2800	2970.62
unknown466	1	1	24	6	534.926	0.999912	1	21.7778	6	12792.5	1	1	22.8889	6.01417	12046.2	532.501	0.044205	13168	14146	10371	11289	12542	11203	12363	15062	10956	13729	14379	7421	12978	11381	10502	10948	12027.4
unknown468	1	1	18	0	17435.7	0.729907	1	28	6.63e-05	89415.8	0.95971	1	23	2.72e-05	58939.4	14390	0.244149	69011	135809	40807	112037	45626	64224	33569	51425	71253	44226	36243	41348	42075	59274	72236	32187	59459.4
unknown470	0.873774	1	24	9	364.16	0.932305	1	24.0327	12	4774.75	0.981645	1	24.0163	10.499	4469.51	433.254	0.0969354	2873	4222	5195	4297	4846	5128	3996	5028	4740	4547	4401	5411	4662	3509	4031	4631	4469.81
unknown478	0.0579045	0.164742	24	3	11075.4	0.163127	0.616258	28	7.53e-05	68727.9	0.0534838	0.175616	26	1.62503	57213.3	1587.91	0.0277542	69943	64286	64959	75724	56138	68650	58184	59637	69258	53695	51129	36440	44881	48097	49046	44864	57183.2
unknown480	0.182589	0.344328	24	3	776.226	0.495803	1	28	6.63e-05	6738.75	0.307985	0.609204	26	1.62503	6117.89	113.065	0.018481	5959	6411	7050	7535	5732	7063	6060	6964	7284	5844	5411	4851	5178	5462	5925	5123	6115.75
unknown49	0.475047	0.709773	24	6	1497.3	0.92708	1	26.8085	6.00001	39261.8	0.801565	1	25.4043	6.01839	37713.9	1515.47	0.0401832	32993	36572	42983	40887	37852	43132	35418	40645	39601	37588	37473	37040	36836	34344	35509	35697	37785.6
unknown492	0.587657	0.827106	24	3	312.188	0.999982	1	23.1496	6	6780.25	0.900057	1	23.5748	4.52853	6478.13	377.149	0.0582189	4436	6430	7955	7050	6401	7474	6923	6323	7547	5949	6071	6253	6164	6332	6200	6098	6475.38
unknown522	0.105571	0.233107	24	3	11307	0.356629	0.858361	28	5.81e-05	82385.4	0.161119	0.376618	26	1.62503	68856.6	4815.58	0.0699364	95842	73965	66110	93625	67830	86046	59885	72289	77011	62989	56782	51744	53142	62360	67632	52995	68765.4
unknown525	0.235786	0.416243	24	3	4691.3	0.611959	1	25.2722	5.06e-05	44438	0.423628	0.766762	24.6361	1.53978	36647.9	8466.05	0.23101	48288	34562	37578	57324	25228	37320	39701	41987	28719	30077	41411	19754	31456	42496	35723	33452	36567.2
unknown529	1	1	24	0	194.985	0.999947	1	21.0501	17.9999	1436.25	1	1	22.5251	20.8931	1263.95	180.655	0.142928	1484	490	1220	2373	1000	613	1024	1520	435	1229	2086	1200	1004	1077	1540	2124	1276.19
unknown556	0.139706	0.285865	24	0	628.795	0.409244	0.927863	24.1644	6.63e-05	3460.49	0.220786	0.474011	24.0822	3.3e-05	2908.34	758.883	0.260934	4722	2258	3234	3628	2486	2639	1930	2743	2372	2382	3064	1951	3726	3362	3320	2684	2906.31
unknown56	0.301037	0.504016	24	0	783.121	0.721654	1	26.3284	6.63e-05	5004.99	0.548919	0.931854	25.1642	3.17e-05	3291.27	1414.7	0.429833	9105	2979	3383	4553	3538	3967	769	1532	3125	2589	2340	1302	2561	3761	3085	3318	3244.19
unknown563	0.235786	0.416243	24	3	8612.03	0.794399	1	23.6461	6.63e-05	80636.7	0.50105	0.86913	23.8231	1.48897	70145.2	12155.7	0.173294	84446	80588	67239	90274	59180	82102	71334	81911	78357	59821	65915	33002	50602	83614	79348	55226	70184.9
unknown566	0.0787266	0.19462	24	3	1489.87	0.131581	0.592036	28	6.63e-05	7014.74	0.0576982	0.184499	26	1.62503	5238.03	77.766	0.0148464	8276	6477	5999	7307	5246	6279	5102	5861	6509	5260	4397	2623	3138	3940	3982	3436	5239.5
unknown57	0.182589	0.344328	24	3	1304.44	0.616567	1	26.3284	5.19e-05	13515	0.358461	0.67599	25.1642	1.57279	11638.3	1760.97	0.151308	11704	12521	12985	16850	10686	14776	10789	11865	12816	10367	10681	6615	9897	11922	11755	9565	11612.1
unknown584	0.105571	0.233107	24	18	3886.44	0.420677	0.939036	25.1282	17.9999	13081.2	0.182719	0.41403	24.5641	18.0095	9247.27	2848.86	0.308076	12095	9966	3722	4991	7047	8622	1904	5423	12886	4221	15934	8028	12525	12534	16518	10748	9197.75
unknown591	0.0579045	0.164742	24	3	1012.05	0.141077	0.596796	28	6.63e-05	4407.74	0.0474406	0.160688	26	1.62503	3197.17	23.8109	0.00744748	5416	4200	3397	4618	3103	4036	3007	3586	3936	3015	2605	1709	1706	2446	2512	1870	3197.62
unknown592	0.380147	0.60181	24	21	15045.5	0.584983	1	26.6465	17.9999	66687.3	0.556699	0.941094	25.3233	19.632	41898.5	17951	0.428442	86159	31543	19520	17335	38556	37300	16873	19973	42101	33656	30784	14655	59309	95557	69235	42649	40950.3
unknown609	0.587657	0.827106	24	18	1441.26	0.969648	1	22.5575	17.9999	10075	0.890307	1	23.2788	18.0173	8486.1	1309.93	0.154362	11846	10197	5868	4589	8603	5964	5056	7040	6698	7432	16169	6550	9969	9584	12269	8478	8519.5
unknown618	0.105571	0.233107	24	18	889.894	0.931768	1	22.3291	17.9999	4118.75	0.326486	0.633673	23.1646	18.0234	3280.83	883.729	0.269361	6975	2754	1991	1936	3030	2279	1709	2235	3130	3198	5037	2167	4157	3383	5117	3818	3307.25
unknown620	0.0579045	0.164742	18	12	582.479	0.47829	0.999931	25.4179	12	6516	0.127024	0.319967	21.7089	12.3608	5561.06	1509.46	0.271435	3218	5211	6980	5649	5132	6837	5400	6653	7023	6104	5164	7773	4147	3691	4206	4339	5470.44
unknown628	0.139706	0.285865	24	3	3202.13	0.502572	1	28	6.5e-05	24445.5	0.256713	0.533497	26	1.62503	20716.7	923.764	0.0445904	28865	21556	19727	27634	21274	25602	17052	21531	23695	19291	17015	16257	16247	19025	20139	16277	20699.2
unknown66	1	1	24	0	1469.01	0.999987	1	20	6.63e-05	10888	1	1	22	3.65e-05	10116	1412.17	0.139597	14688	4372	8813	15679	9265	5030	10681	16501	4519	9852	10910	8863	7595	9704	13584	13572	10226.8
unknown661	0.719948	0.96651	18	15	757.311	0.998791	1	20	12	5619.5	0.956219	1	19	13.6167	4619.36	1217.8	0.263631	4911	3874	5317	4456	3724	5038	2478	4080	1635	9636	5019	6188	5288	4066	3894	4117	4607.56
unknown664	1	1	18	15	1146.57	0.990204	1	24.7059	17.9999	7311.5	0.999952	1	21.3529	16.6756	6852.48	1438.46	0.209918	11402	8842	6444	6187	6145	7248	4144	5968	1918	8965	7034	7892	8141	6955	8257	5893	6964.69
unknown670	1	1	18	0	367.519	0.994836	1	27.4766	17.9999	4436	0.999987	1	22.7383	18.8171	4556.31	488.499	0.107214	7737	5129	4500	4085	4187	4422	3792	4595	3980	4666	5925	2557	4216	4347	5302	3879	4582.44
unknown671	1	1	24	0	856.66	0.999809	1	22.7907	6.63e-05	6036	1	1	23.3953	3.4e-05	5490.73	918.506	0.167283	8034	2747	4948	8415	4318	2728	5866	8073	3445	4953	5913	4685	4457	5763	7604	6212	5510.06
unknown680	1	1	24	6	532.628	0.999982	1	28	6.36e-05	7494	1	1	26	3.25003	7113.36	112.579	0.0158265	8040	5416	8351	8169	8272	8316	6702	5774	5659	8589	7181	6084	6806	6993	6052	7439	7115.19
unknown695	0.105571	0.233107	24	6	843.048	0.3388	0.83683	21.7778	6	3846.75	0.154898	0.365393	22.8889	6.01417	3140.97	296.311	0.0943374	3110	2921	4061	4406	3065	5004	3417	3901	3806	2659	1576	1559	2541	2621	3070	2371	3130.5
unknown702	1	1	18	15	239.532	0.996709	1	26.0177	17.9999	1862.5	0.999995	1	22.0088	16.7836	1846.94	357.705	0.193674	3271	1806	1999	1719	2076	1326	1283	1711	1682	2067	2217	1266	1684	2062	2140	1564	1867.06
unknown725	1	1	24	0	5460.28	0.876463	1	24.1644	6.63e-05	49263.2	0.992034	1	24.0822	3.3e-05	43424.7	7752.4	0.178525	65167	36193	45333	50360	38576	44365	37159	37472	42287	39689	45104	25970	37233	59711	52687	37159	43404.1
unknown731	0.235786	0.416243	24	6	4656.65	0.147383	0.601421	28	4.59e-05	16405.5	0.151498	0.360163	26	3.25002	12197.5	270.329	0.0221627	21830	11785	15382	16625	16202	14620	13228	14346	13291	15787	15628	5329	4817	5440	6513	4407	12201.9
unknown734	1	1	18	15	816.355	1	1	28	12	9279.25	1	1	23	14.5119	8914.57	1138.29	0.127688	11280	9966	9390	7850	8285	11701	8312	5922	9807	11003	10858	5449	8270	8149	9668	6668	8911.12
unknown757	0.139706	0.285865	18	15	2009.24	0.997556	1	20	12	8732.25	0.414005	0.755716	19	13.6167	5885.7	3795.64	0.644893	9564	7813	4585	7198	4685	5009	2768	4797	5143	9350	15186	5250	2783	3329	3599	2524	5848.94
unknown765	0.139706	0.285865	18	0	470.58	0.497293	1	24.7059	17.9999	3417.75	0.25475	0.530768	21.3529	18.455	3197.54	434.37	0.135845	3812	3105	3844	4063	2972	3479	2269	3010	3548	2685	3201	2301	3175	3253	3277	3966	3247.5
unknown767	1	1	18	0	2001.47	0.98519	1	28	17.9999	12963.5	0.99989	1	23	18.8928	14565.5	4351.51	0.298754	46679	23035	9807	8886	15526	11867	9290	11079	11883	13998	16818	5262	12677	15264	18050	5863	14749
unknown771	0.105571	0.233107	24	6	3691.45	0.0999731	0.589446	28	6.63e-05	11255.2	0.0585889	0.186669	26	3.25003	7872.92	556.118	0.0706369	11396	14203	8470	10952	10433	12560	6837	9391	11279	8860	10813	6023	1774	861	1016	954	7863.88
unknown775	0.182589	0.344328	24	3	6184	0.436262	0.954985	27.6489	6.63e-05	56855.7	0.28119	0.569109	25.8245	1.61406	47420.5	6328.15	0.133448	66060	52959	48884	59520	41034	54963	44056	48123	49796	43235	44227	28571	38302	52600	49007	35516	47303.3
unknown779	0.301037	0.504016	24	6	36900.4	0.402771	0.916911	28	6.63e-05	140970	0.377073	0.703484	26	3.25003	94969.1	24642.7	0.259481	202144	117929	119307	124499	92176	132319	83876	91672	154700	104554	80891	33950	41961	49146	50597	33372	94568.3
unknown784	0.475047	0.709773	24	6	1994.75	0.687928	1	28	12	9027	0.692293	1	26	8.82143	8720.51	295.301	0.0338629	12574	11245	7153	14177	5567	11657	8337	9953	8843	8350	12295	6620	5643	6374	5551	5615	8747.12
unknown828	0.531352	0.792626	18	6	1752.21	0.998226	1	20	5.99997	11740.8	0.866745	1	19	6.01665	10256.1	1490.68	0.145346	5008	7702	13831	11354	8096	12467	12569	13831	10596	8774	5275	10090	10729	11221	8142	11523	10075.5
unknown846	0.587657	0.827106	18	9	259.331	0.871722	1	20	6	1089.5	0.854932	1	19	7.6	748.63	325.276	0.434496	423	321	424	511	1108	791	2153	306	331	1183	566	608	585	354	647	644	684.688
unknown851	0.105571	0.233107	24	0	501.869	0.436674	0.955138	21.995	4.17e-05	4810.75	0.187947	0.422351	22.9975	2.18e-05	4288.72	635.533	0.148187	5391	4249	5019	4584	4318	5347	3605	3775	4406	3739	3485	3026	4256	4856	4791	4141	4311.75
unknown863	0.182589	0.344328	24	18	5102.66	0.472079	0.993644	28	17.9999	23057	0.297474	0.593885	26	18.1071	15649.2	177.383	0.011335	6397	16543	7872	8440	23915	15453	7295	11635	11701	15945	19106	13706	22080	18026	28394	23728	15639.8
unknown867	0.475047	0.709773	24	6	2852.12	0.373397	0.874287	28	12	7792.25	0.484154	0.849857	26	8.82143	7294.23	453.653	0.0621934	13914	12695	7809	10059	9521	8751	4638	7128	10148	8628	9127	3266	2249	2643	3809	2977	7335.12
unknown877	0.0787266	0.19462	24	18	2495.2	0.282463	0.770631	26.3284	17.9999	11101.5	0.106872	0.283268	25.1642	18.0386	7359.52	3090.16	0.419886	9342	7575	4285	4573	5381	5243	2784	4617	6549	4178	5780	11374	16663	9371	10248	8124	7255.44
unknown882	0.182589	0.344328	18	15	29078.5	0.999983	1	28	12	105055	0.493079	0.861213	23	14.5119	91122.2	48691.1	0.53435	166794	129414	109662	77554	100403	57331	55897	64348	80791	140346	128570	70512	52447	61586	66098	93844	90974.8
unknown888	0.0787266	0.19462	24	3	55774.3	0.147143	0.601421	28	6.33e-05	118849	0.0632272	0.19673	26	1.62503	73742.7	490.382	0.0066499	142805	95648	110086	126857	73927	115868	101418	93629	149038	49435	22133	11313	22692	27390	21787	15708	73733.4
unknown899	0.105571	0.233107	24	3	639.578	0.756891	1	27.3065	6.63e-05	3763.75	0.281819	0.56997	25.6533	1.60336	3039.35	603.056	0.198416	5188	2558	4022	3287	5377	2395	2710	3135	2547	3870	2014	1496	2313	2675	2645	2225	3028.56
unknown900	0.587657	0.827106	24	3	495.505	0.89386	1	28	12	3669	0.86347	1	26	7.19643	4129.38	778.026	0.188412	8573	6658	3356	4063	3380	4020	2780	4246	5848	3250	3535	2043	3830	3237	3893	2340	4065.75
unknown902	0.139706	0.285865	24	3	23690.9	0.523441	1	28	6.63e-05	111459	0.264397	0.546213	26	1.62503	75831.7	6332.22	0.0835036	168963	90841	89428	96604	70673	91899	58630	81679	117410	60998	61540	31328	42810	58487	53532	40403	75951.6
unknown915	0.475047	0.709773	24	18	728.32	0.684582	1	28	17.9999	5214.49	0.690512	1	26	18.1071	4285.12	186.943	0.0436261	2732	3335	4784	3553	3193	3910	3959	4857	4948	3569	3778	4927	6125	5253	5954	3526	4275.19
unknown95	1	1	24	6	913.052	0.97232	1	20.1831	6	6526.75	0.999613	1	22.0915	6.04512	5549.83	699.66	0.126069	3087	5332	7794	6423	4888	7875	6140	7204	7756	4972	2570	4151	5489	4485	5110	4857	5508.31
unknown953	0.182589	0.344328	24	21	1460.35	0.530489	1	24.9858	17.9999	9229.23	0.322981	0.629033	24.4929	19.5381	7417.54	1737.95	0.234303	5945	6186	8522	10601	5822	7218	4610	6373	8558	4368	6509	6480	7970	9333	7428	12186	7381.81
unknown958	0.301037	0.504016	24	6	1507.02	0.704906	1	28	6.63e-05	7886.99	0.541163	0.921528	26	3.25003	5928.12	1037.27	0.174975	8408	10696	4830	7614	5806	5453	4971	8089	6671	4569	8797	2828	4362	4215	4288	2983	5911.25
unknown968	1	1	18	15	2419.37	0.999074	1	20	12	9642.5	1	1	19	13.6167	5090.42	5864.95	1.15215	692	2489	20290	942	1107	4985	203	489	260	21252	3368	13690	430	8263	1782	296	5033.62
unknown972	0.301037	0.504016	24	6	1818.68	0.561285	1	28	6.63e-05	7930.24	0.4694	0.830752	26	3.25003	5709.39	911.641	0.159674	8035	11430	6946	5310	8185	5564	4834	5570	7987	3733	7483	2470	3019	3416	4321	2810	5694.56
unknown974	0.0787266	0.19462	24	6	1475.02	0.13028	0.592031	28	7.61e-05	6467.74	0.0572297	0.183596	26	3.25004	4998.28	1.83505	0.000367136	7210	6215	5363	7083	5151	6568	4575	5664	6007	5049	4100	2879	2841	4017	3875	3376	4998.31
unknown985	0.0579045	0.164742	24	3	2973.91	0.0594118	0.589446	28	5.78e-05	6052.24	0.0229539	0.106419	26	1.62503	3342.63	422.792	0.126485	7780	5949	5122	5358	3805	6004	3815	4343	5612	2251	761	248	483	634	712	477	3334.62

## Sheet: unique cycling in perAS
CycID	JTK_pvalue	JTK_BH.Q	JTK_period	JTK_adjphase	JTK_amplitude	LS_pvalue	LS_BH.Q	LS_period	LS_adjphase	LS_amplitude	meta2d_pvalue	meta2d_BH.Q	meta2d_period	meta2d_phase	meta2d_Base	meta2d_AMP	meta2d_rAMP	0	0.1	0.2	0.3	6	6.1	6.2	6.3	12	12.1	12.2	12.3	18	18.1	18.2	18.3	PerS
unknown1418	2.22e-07	0.000619603	24	21	3425.58	0.0144725	0.589446	24.7059	17.9999	18703	6.6e-08	0.000184331	24.3529	19.5258	14901.1	3724.45	0.249945	16592	14977	14504	17240	10708	12030	11047	12688	13963	12746	13481	12746	17928	19731	19509	17644	14845.9
unknown320	1.91e-05	0.0177619	24	3	502.399	0.125911	0.589446	27.4766	6.81e-05	2638	3.35e-05	0.0134349	25.7383	1.60868	1738.13	668.897	0.384838	4014	2139	1869	2530	1679	1767	1541	2127	1463	1137	1228	693	1360	1480	1321	1267	1725.94
unknown387	4.22e-05	0.0188264	24	21	1892.22	0.0297235	0.589446	26.9725	17.9999	11190.5	1.83e-05	0.0134349	25.4862	19.6543	7064.19	2834.4	0.401235	6957	4767	6512	6675	4957	4611	4531	4685	5333	5122	6224	5224	10323	13263	10715	10461	6897.5
4-Aminobenzoic acid	8.77e-05	0.0188264	24	21	4701.73	0.0421845	0.589446	27.3065	17.9999	22006.7	5e-05	0.0134349	25.6533	19.6784	10697.2	7411.73	0.692866	11241	8500	6302	6442	5252	5345	4615	5571	5593	6809	5937	3832	21259	26681	22343	17744	10216.6
Ala-Glu	8.77e-05	0.0188264	24	18	19287.8	0.0320853	0.589446	28	17.9999	58029.9	3.88e-05	0.0134349	26	18.1071	34232.4	14546.6	0.424937	30891	19540	19446	19593	27861	17884	12120	19006	23385	28653	51100	33747	52965	63308	63405	52442	33459.1
Asp-Ser	8.77e-05	0.0188264	24	18	590.611	0.0385039	0.589446	27.4766	17.9999	2285.99	4.59e-05	0.0134349	25.7383	18.0825	1413.29	612.427	0.433332	1472	831	1058	894	1082	718	648	840	1119	1508	1670	1164	2066	2247	2954	1877	1384.25
unknown1168	8.77e-05	0.0188264	24	21	2523.84	0.0621914	0.589446	25.8651	17.9999	10186.2	7.15e-05	0.0134349	24.9326	19.5835	6248.73	3196.56	0.511554	7485	6907	4680	6116	4507	3758	3829	3449	4640	4919	4213	2788	7873	11862	12931	8079	6127.25
unknown1353	8.77e-05	0.0188264	24	21	1928.99	0.0381146	0.589446	26.8085	17.9999	7218.47	4.55e-05	0.0134349	25.4043	19.6429	3576.09	2565.06	0.71728	4335	2465	2323	2961	1432	1648	1932	1782	1983	1873	2370	949	6048	7962	8212	6652	3432.94
unknown2063	8.77e-05	0.0188264	24	21	532.275	0.0772873	0.589446	27.1385	17.9999	2713.24	8.74e-05	0.0138024	25.5692	19.6661	1419.41	881.184	0.620808	1328	983	1208	1146	670	929	874	568	953	785	903	639	1917	3835	2897	2204	1364.94
unknown2232	8.77e-05	0.0188264	24	21	10330.8	0.0825742	0.589446	25.5652	17.9999	36743.6	9.29e-05	0.0138024	24.7826	19.5668	20873.8	13399.1	0.64191	27579	23645	13622	20394	11631	9489	6047	8747	18156	13257	17768	9780	18596	39423	53307	35649	20443.1
unknown631	8.77e-05	0.0188264	24	21	1300.72	0.0310033	0.589446	26.8085	6.63e-05	2162.24	3.76e-05	0.0134349	25.4043	23.8165	2516.32	2077.87	0.825758	2825	2350	1573	1901	1088	1501	1100	1163	1265	1254	1560	668	5143	5039	5229	4761	2401.25
unknown719	8.77e-05	0.0188264	24	21	9317.55	0.0623579	0.589446	25.7143	17.9999	29403.9	7.17e-05	0.0134349	24.8571	19.575	16840	9937.23	0.590095	25636	13979	10463	14596	8857	8652	5561	6847	10208	10810	21728	8912	19252	32080	35188	31096	16491.6
Acetylcarnitine	0.000171384	0.0223367	24	18	170513	0.0321377	0.589446	28	17.9999	609848	7.22e-05	0.0134349	26	18.1071	214547	210350	0.980437	36728	61267	19456	30580	20823	41933	22739	23784	85417	60484	263619	147612	486827	683141	770941	498493	203365
Asp-His	0.000171384	0.0223367	24	21	278.247	0.0427518	0.589446	24.9858	17.9999	1374	9.4e-05	0.0138024	24.4929	19.5381	990.371	340.381	0.34369	1281	916	915	1007	687	849	576	580	955	789	928	755	1315	1350	1694	1137	983.375
Carnitine	0.000171384	0.0223367	24	18	223722	0.0308885	0.589446	27.1385	17.9999	1.33695e+06	6.96e-05	0.0134349	25.5692	18.068	960315	282071	0.293727	896172	692415	878970	916017	692922	827237	674566	652802	915151	713147	933376	1027897	1224965	1464210	1447743	1210892	948030
unknown2220	0.000171384	0.0223367	24	21	40604.9	0.0843481	0.589446	25.5652	17.9999	146462	0.000175559	0.0146773	24.7826	19.5668	82621.6	53434.3	0.646735	110176	90779	54418	80276	45482	37164	24568	34112	72407	51995	68859	38379	72388	157662	212687	143112	80904
unknown31	0.000171384	0.0223367	24	21	4947.98	0.0411236	0.589446	25.5652	17.9999	18285.5	9.07e-05	0.0138024	24.7826	19.5668	11842.8	5337.07	0.450659	15753	10814	8781	11964	7559	7571	5300	6974	8463	9032	14208	7179	14406	18954	19187	20595	11671.2
unknown861	0.000171384	0.0223367	24	21	477.651	0.0755649	0.589446	26.4865	17.9999	2121.74	0.000158702	0.0146209	25.2432	19.6214	1374.69	548.036	0.398663	1642	1052	1313	1152	898	947	969	1006	1009	971	1295	817	1763	2400	2637	1687	1347.38
unknown995	0.000171384	0.0223367	24	18	4468.03	0.0274999	0.589446	28	17.9999	20146.4	6.25e-05	0.0134349	26	18.1071	7800.22	6724.8	0.86213	3603	2328	2578	1988	3373	1869	1517	1754	2490	3431	8160	5407	17109	19915	21928	21634	7442.75
2-Ethyl-L-glutamic acid	0.000320124	0.0223367	24	21	1970.18	0.0521994	0.589446	26.6465	17.9999	6013.72	0.000200515	0.0149642	25.3233	19.632	2909.74	2220.79	0.763227	4281	1730	1695	2258	1171	1629	1227	1028	1741	1435	1704	725	5817	7247	6582	4409	2792.44
Gly-Ser	0.000320124	0.0223367	24	18	1159.83	0.0362062	0.589446	26.8085	17.9999	3610.24	0.00014332	0.0141025	25.4043	18.0551	2215.54	1038.7	0.468826	2761	1545	1120	1334	1808	1091	641	1118	1631	1902	2752	2646	3458	3522	4073	3388	2174.38
Thr-Ser	0.000320124	0.0223367	24	18	5693.62	0.0330643	0.589446	27.8233	17.9999	21010.5	0.000131844	0.0141025	25.9117	18.0985	13639.6	5029.89	0.36877	14279	10671	7679	8717	11605	8600	6060	8163	13279	11783	16976	12255	22349	18644	24344	18705	13381.8
unknown1077	0.000320124	0.0223367	24	18	4594.78	0.0460664	0.589446	28	17.9999	12317.7	0.000178799	0.0146773	26	18.1071	6251.05	2989.69	0.478271	2948	3379	2693	2782	5762	2125	2026	2483	2882	4311	9108	7704	10182	10723	15770	12596	6092.12
unknown1201	0.000320124	0.0223367	24	21	2026.57	0.0561743	0.589446	25.8651	17.9999	6746.48	0.000214464	0.0149642	24.9326	19.5835	3876.29	2249.36	0.580285	5663	3194	2456	3406	2173	2053	1280	1586	2391	2628	4821	2016	4513	7336	8079	7058	3790.81
unknown1478	0.000320124	0.0223367	24	18	6403.21	0.0509972	0.589446	27.8233	17.9999	19752.4	0.000196277	0.0149642	25.9117	18.0985	9022.39	7516.17	0.833058	12190	3468	2706	3152	4402	2739	1292	2178	7038	5456	9824	4739	14134	23572	25335	15969	8637.12
unknown1507	0.000320124	0.0223367	24	21	31966.9	0.0779033	0.589446	25.8651	17.9999	157227	0.000289267	0.0161023	24.9326	19.5835	104242	42251	0.405315	120820	104362	79714	101480	74359	68743	56093	62419	94717	83670	96652	70248	96451	161545	209137	161775	102637
unknown154	0.000320124	0.0223367	24	18	523.613	0.027199	0.589446	27.1385	17.9999	4165.49	0.000110156	0.0141025	25.5692	18.068	3346.19	612.921	0.18317	3102	2877	3072	3269	2910	3001	2371	2870	2971	3173	3625	3209	3800	4264	4286	4312	3319.5
unknown1540	0.000320124	0.0223367	18	3	1075.86	0.0769627	0.589446	27.4766	6.63e-05	7251.98	0.000286073	0.0161023	22.7383	1.89489	9177.61	10879.7	1.18547	10193	7336	4680	6799	3999	4539	4076	5175	4373	3054	6506	2124	15176	23111	30422	19195	9422.38
unknown1545	0.000320124	0.0223367	24	21	1151.88	0.065214	0.589446	25.7143	17.9999	5109.49	0.000245861	0.0159581	24.8571	19.575	3215.44	1525.72	0.474497	3709	3305	2234	3327	2202	1780	1498	1635	2861	2613	3008	1981	2910	5471	6581	5476	3161.94
unknown610	0.000320124	0.0223367	24	21	6268.86	0.0415879	0.589446	28	17.9999	40840.1	0.000162778	0.0146209	26	19.7321	19258.9	13316.7	0.691457	17682	10826	11179	11848	10016	9603	9210	8423	10914	9985	11200	7488	36159	46744	45428	35030	18233.4
unknown697	0.000320124	0.0223367	24	18	2894.19	0.0335894	0.589446	27.8233	17.9999	8037.48	0.000133768	0.0141025	25.9117	18.0985	4326.02	2574.35	0.595085	4674	2487	2431	1731	2831	1595	1742	1477	2515	2918	6570	3984	7868	8654	8694	6934	4194.06
unknown844	0.000320124	0.0223367	24	21	856.306	0.0429411	0.589446	24.8451	17.9999	4458.49	0.000167635	0.0146209	24.4225	19.5318	3489.57	923.026	0.26451	3284	3607	3357	4482	2911	2523	2355	2881	3101	2860	3780	2597	4585	4735	4588	3926	3473.25
unknown845	0.000320124	0.0223367	24	21	2520.48	0.0770835	0.589446	25.5652	17.9999	9976.97	0.000286484	0.0161023	24.7826	19.5668	6769.11	2758.65	0.407535	10024	5981	5525	6550	5156	5319	3713	4464	5388	5414	6455	2990	8225	10900	11315	9468	6680.44
unknown970	0.000320124	0.0223367	24	21	923.128	0.0356248	0.589446	27.8233	17.9999	6685.97	0.000141203	0.0141025	25.9117	19.718	3362.24	2057.78	0.612027	2710	2143	2211	2526	1833	2193	1502	1626	1758	2087	2373	1655	5550	6727	7143	7324	3210.06
3-Phosphonopropionic acid	0.000446109	0.0275296	24	21	141.068	0.0394425	0.589446	26.4865	17.9999	550.248	0.00021023	0.0149642	25.2432	19.6214	289.484	189.053	0.65307	335	270	229	155	204	50	138	65	204	239	234	157	399	515	733	554	280.062
5-O-Feruloylquinic acid	0.000446109	0.0275296	24	21	1651.8	0.0366793	0.589446	28	17.9999	13583.2	0.000196691	0.0149642	26	19.7321	5516.03	4847.21	0.878751	4068	2524	2402	3107	2143	2146	1694	1774	1994	2143	2483	1473	12318	14686	14632	12697	5142.75
L-Saccharopine	0.000572095	0.0275296	24	21	1148.34	0.0299131	0.589446	27.3065	17.9999	4980.48	0.000204941	0.0149642	25.6533	19.6784	2463.15	1684.31	0.683804	2397	1381	1808	1984	1153	1535	1008	794	2000	1367	1324	990	4183	5265	5106	5368	2353.94
Methacholine cation	0.000572095	0.0275296	24	21	1525.94	0.0598188	0.589446	26.9725	17.9999	4722.23	0.000386114	0.0182652	25.4862	19.6543	2507.66	1557.55	0.621114	3634	1685	1531	1752	1414	1516	1319	1221	1793	1549	1481	873	4088	5507	5292	4002	2416.06
Phenylpyruvic acid	0.000572095	0.0275296	18	3	49.1439	0.081941	0.589446	27.3065	7.21e-05	303	0.000514156	0.0209554	22.6533	1.8878	337.029	271.123	0.80445	382	200	278	352	239	293	215	249	227	208	201	153	569	757	601	575	343.688
unknown1003	0.000572095	0.0275296	18	12	10437.1	0.103984	0.589446	27.3065	12	84242.8	0.000638298	0.0234407	22.6533	12.5286	58456.8	44312.7	0.758043	48140	59984	77619	68082	69285	76868	66787	65079	68384	82841	95350	90396	11537	10288	8940	10884	56904
unknown1176	0.000572095	0.0275296	24	18	975.631	0.0352851	0.589446	26.9725	17.9999	6603.99	0.000238412	0.015843	25.4862	18.0614	5031.15	1203.98	0.239306	4472	3712	5078	4903	3893	4346	3976	3493	5016	4419	4958	5015	5724	7602	6834	6256	4981.06
unknown1213	0.000572095	0.0275296	24	18	3351.69	0.0408152	0.589446	28	17.9999	9854.22	0.000272377	0.0161023	26	18.1071	4379.54	3143.64	0.7178	2807	1764	1706	1473	2113	1393	1221	1255	1411	2609	6311	3919	7432	11814	12095	8076	4212.44
unknown1358	0.000572095	0.0275296	24	21	3841.53	0.0458708	0.589446	27.4766	17.9999	15068.9	0.000303051	0.0162563	25.7383	19.6911	6692.1	5399.67	0.806872	7624	3636	3461	3936	3418	3369	2179	2130	3560	2899	3290	1432	12783	18330	14989	14174	6325.62
unknown191	0.000572095	0.0275296	24	21	1086.12	0.0374933	0.589446	28	17.9999	6851.72	0.00025203	0.0159867	26	19.7321	3199.58	2249.92	0.703193	2980	1763	1709	2059	1659	1579	1366	1588	1581	1601	1900	1229	6273	7021	7471	6642	3026.31
unknown1999	0.000572095	0.0275296	24	21	2809.69	0.0444126	0.589446	26.6465	17.9999	9960.71	0.000294238	0.0161023	25.3233	19.632	5259.74	3456.24	0.657111	7007	3067	3883	4734	3452	3171	1722	1852	3543	3844	3268	1849	7603	11288	11493	9459	5077.19
unknown541	0.000572095	0.0275296	24	21	2196.98	0.039117	0.589446	28	17.9999	15959.4	0.000261996	0.0161023	26	19.7321	5896.67	5966.58	1.01186	4482	2101	1793	2417	1694	1609	1191	1307	1605	1648	2281	1029	13037	17543	17519	15739	5437.19
unknown564	0.000572095	0.0275296	24	6	3409.49	0.136191	0.595555	25.1282	6	9874	0.000814975	0.0246668	24.5641	6.00317	6964.51	2152.37	0.309049	11941	6231	6205	9071	10851	9707	12413	6525	4748	9516	5886	3874	4230	3845	3603	3430	7004.75
unknown611	0.000572095	0.0275296	18	3	363.806	0.187147	0.639825	23.3952	6.63e-05	4217.99	0.00108587	0.0272858	20.6976	1.72483	3456.68	967.122	0.279783	5513	3467	3558	4334	3325	3418	2641	3320	2977	2879	3305	1694	3560	4406	4409	3902	3544.25
unknown740	0.000572095	0.0275296	18	3	656.018	0.0826267	0.589446	25.8651	6.63e-05	4708.49	0.000518065	0.0209554	21.9326	1.82774	4438.54	2624.16	0.591221	5821	3819	4133	5061	3044	3878	2833	3535	4051	2855	3121	1845	5989	8984	7827	6102	4556.12
unknown741	0.000572095	0.0275296	24	21	1246.45	0.0502458	0.589446	26.9725	6.63e-05	1974	0.000329336	0.0167123	25.4862	23.8934	2358.89	1924.49	0.815845	2900	1601	1402	1993	1140	1426	1129	1215	1256	1150	1290	622	4008	4871	5668	4276	2246.69
unknown1501	0.000779665	0.0328021	24	21	1393.71	0.035235	0.589446	27.6489	17.9999	7643.22	0.000315987	0.0163318	25.8245	19.7043	3636.82	2566.04	0.705572	3581	1708	2326	2798	1642	2036	1590	1630	1845	2154	2036	1359	7741	7960	8166	6706	3454.88
unknown346	0.000779665	0.0328021	24	18	941.866	0.025367	0.589446	25.7143	17.9999	8825.49	0.00023399	0.015843	24.8571	18.0214	7405.64	1250.14	0.168809	7466	6770	6922	7415	6152	6926	5610	6219	6922	7553	7810	6911	8026	9354	8916	9006	7373.62
(1S,4aS,7aS)-1-(.beta.-D-Glucopyranosyloxy)-7-((((2E)-3-phenylprop-2-enoyl)oxy)methyl)-1,4a,5,7a-tetrahydrocyclopenta[c]pyran-4-carboxylic acid	0.000987235	0.0328021	18	3	677.055	0.122361	0.589446	26.8085	4.88e-05	4024.75	0.00121057	0.0285911	22.4043	1.86704	4168.77	2477.63	0.59433	3168	3855	3987	5089	2555	4301	3068	3970	2855	2722	2253	3386	6198	7109	5825	7588	4245.56
(R)-Pantetheine	0.000987235	0.0328021	24	18	139.654	0.0773672	0.589446	28	17.9999	4711.73	0.000800443	0.0246668	26	18.1071	1395.48	1725.57	1.23655	162	163	153	129	205	119	97	108	173	126	295	283	7027	2710	4641	4469	1303.75
Glu-Ala-Arg	0.000987235	0.0328021	24	21	8353.05	0.153835	0.603875	25.5652	17.9999	38831.7	0.0014872	0.0310861	24.7826	19.5668	26303.3	10398.3	0.395325	40214	21416	23508	20466	18714	18806	13913	16215	21389	19309	30512	15715	30532	50998	44006	29791	25969
Gly-Thr	0.000987235	0.0328021	24	18	2688.95	0.0709269	0.589446	28	17.9999	13658	0.000739897	0.0246668	26	18.1071	10965.3	1434.98	0.130865	11364	9230	8587	7073	11288	8453	7029	9102	11984	9970	11893	13620	15068	12674	13816	13074	10889.1
His-Gln	0.000987235	0.0328021	24	21	868.15	0.0726205	0.589446	25.5652	6.63e-05	2255.75	0.000755873	0.0246668	24.7826	23.2337	2132.27	1066.62	0.500228	3013	2337	1776	1897	1665	1234	1309	1646	1418	1550	1684	1011	2767	3420	4174	2668	2098.06
Phe-Asp	0.000987235	0.0328021	24	18	479.772	0.092115	0.589446	25.4179	18	1817	0.000937157	0.0257191	24.7089	18.0148	1232.73	513.084	0.416219	1831	905	725	1030	673	831	702	722	1283	960	1629	988	1705	2002	2121	1440	1221.69
Phosphoenolpyruvic acid	0.000987235	0.0328021	24	21	283.903	0.172934	0.622042	28	17.9999	3525.73	0.00165186	0.0310861	26	19.7321	1153.31	1322.91	1.14705	504	50	322	328	128	85	146	102	249	169	336	301	1363	6304	4064	2372	1051.44
Ser-Asn	0.000987235	0.0328021	24	18	1088.06	0.0408176	0.589446	27.1385	17.9999	3986.74	0.000448067	0.0197987	25.5692	18.068	2556.83	1029.28	0.40256	2234	2504	1468	1758	2073	1566	1085	1401	1975	1743	3470	2968	4520	3493	4233	3701	2512
Thr-Gln	0.000987235	0.0328021	24	21	1632.18	0.0561389	0.589446	25.5652	17.9999	7784.48	0.00059859	0.0226999	24.7826	19.5668	5674.43	1732.18	0.305261	6824	6671	4150	4991	4283	3952	3281	4783	5154	4028	5602	5043	8686	6828	8579	7045	5618.75
unknown1075	0.000987235	0.0328021	18	3	151.674	0.0649748	0.589446	27.1385	6.63e-05	1633.99	0.000683428	0.0244544	22.5692	1.8808	2093.49	3326.52	1.58898	3880	846	650	1160	863	628	229	370	493	557	802	153	4050	7492	6938	5804	2182.19
unknown1490	0.000987235	0.0328021	24	21	992.778	0.0377215	0.589446	28	17.9999	17007.4	0.000417018	0.0193983	26	19.7321	5897.38	6151.93	1.04316	2323	1354	2046	2010	1049	1765	1302	907	1703	1720	1536	1033	15013	18689	16261	18067	5423.62
unknown15	0.000987235	0.0328021	24	18	976.161	0.0305256	0.589446	28	17.9999	7228.99	0.000343845	0.0168363	26	18.1071	5884.99	886.422	0.150624	5714	4656	5485	5264	5493	4820	4471	5286	5275	6021	6216	5789	6742	7321	7727	7126	5837.88
unknown1527	0.000987235	0.0328021	24	18	14091.4	0.0414121	0.589446	28	17.9999	45240.1	0.000454002	0.0197987	26	18.1071	17570.4	15093.3	0.859017	7714	6345	1920	3310	5216	4717	1911	2704	8015	2880	20523	22074	34553	62448	47319	36641	16768.1
unknown1574	0.000987235	0.0328021	24	18	1848.91	0.0577122	0.589446	28	17.9999	4795.24	0.000613791	0.0228412	26	18.1071	2489.69	1346.3	0.54075	1387	1749	996	663	1640	791	488	971	1794	2283	5218	1529	4019	5094	6218	3850	2418.12
unknown2147	0.000987235	0.0328021	24	21	11410.8	0.0319953	0.589446	26.8085	17.9999	37088.8	0.000358915	0.0172712	25.4043	19.6429	16845.3	14569.2	0.86488	19066	7912	12859	16706	4910	10535	5200	4656	8626	9141	5581	2967	34523	40543	36726	36564	16032.2
unknown335	0.000987235	0.0328021	24	18	4839.79	0.0271248	0.589446	28	17.9999	20829.2	0.000308701	0.0162563	26	18.1071	7524.87	7026.25	0.933737	2902	1413	1188	925	2112	1344	931	1031	1979	2635	6907	7738	18127	22754	23817	18619	7151.38
unknown423	0.000987235	0.0328021	24	21	4771.2	0.0409834	0.589446	27.4766	17.9999	24239.4	0.000449723	0.0197987	25.7383	19.6911	11530.6	8166.73	0.708266	11039	6758	7132	8679	5418	7852	4310	4535	6087	7002	6459	3392	19442	26804	25831	24881	10976.3
unknown464	0.000987235	0.0328021	24	21	5238.6	0.0430546	0.589446	27.6489	6.63e-05	9191.23	0.000470355	0.0198903	25.8245	24.2105	13302.9	11594.8	0.871599	11744	6884	8047	10090	5990	8906	4886	5009	6401	7657	6176	3963	22929	29589	31156	30440	12491.7
unknown71	0.000987235	0.0328021	24	6	7143.9	0.0303404	0.589446	28	5.99999	16711.2	0.000341941	0.0168363	26	6.03571	10852.3	5065.01	0.466723	10893	13642	20761	17585	14068	20899	16590	15288	15074	11658	8403	9425	1331	1377	1387	770	11196.9
unknown773	0.000987235	0.0328021	24	18	1733.3	0.0521345	0.589446	27.4766	17.9999	6776.48	0.000559701	0.0220018	25.7383	18.0825	4311.05	1782.76	0.413532	4633	3153	3218	3096	3227	2595	2605	2699	3399	2738	5627	3528	6299	8395	6274	6138	4226.5
unknown914	0.000987235	0.0328021	24	18	4538.92	0.042191	0.589446	28	18	9639.98	0.000461765	0.0198275	26	18.1071	4941.94	2238.74	0.453009	2980	1802	1559	1499	4007	1737	1453	1447	2221	3626	7561	8715	11979	8017	8988	9576	4822.94
4-Guanidinobutyric acid	0.00164724	0.0383121	18	3	229.456	0.121797	0.589446	26.4865	7.81e-05	1639.5	0.0019088	0.0323004	22.2432	1.85364	1643.3	844.434	0.513865	1893	1172	1538	1955	1374	1210	1667	1215	1145	1269	1250	1031	2220	3054	2603	2176	1673.25
Ala-Thr	0.00164724	0.0383121	24	18	3276.38	0.0566883	0.589446	27.3065	17.9999	16613.7	0.000959832	0.0257586	25.6533	18.075	10601.2	4383.37	0.41348	13694	8150	6830	6888	9173	7174	5146	6457	9719	9421	9603	7718	18040	14736	19180	14499	10401.8
Gln-Glu	0.00164724	0.0383121	24	18	5078.09	0.0338481	0.589446	28	17.9999	16473.7	0.00060186	0.0226999	26	18.1071	10347.2	3661.29	0.353844	9687	6113	7438	5350	8807	6307	4466	6190	8440	8926	14877	9945	15024	18095	18051	14725	10152.6
Gly-Tyr	0.00164724	0.0383121	24	21	2105.23	0.0742681	0.589446	26.1721	17.9999	9585.48	0.00122444	0.0285911	25.0861	19.6016	6212.76	2460.42	0.396027	7398	6312	3705	5266	4147	4019	2699	4024	4631	5221	7521	4391	7983	10416	12473	7470	6104.75
Thr-Gly-Thr	0.00164724	0.0383121	24	18	1806.66	0.056004	0.589446	28	17.9999	5807.49	0.000949365	0.025725	26	18.1071	3724.12	1256.82	0.337481	3673	2854	1894	1897	3826	1869	1709	1884	2392	3392	5495	4402	5474	6138	6199	5419	3657.31
Uridine-5-diphosphoacetylglucosamine	0.00164724	0.0383121	24	18	12736.4	0.0439766	0.589446	28	17.9999	94008.1	0.000762993	0.0246668	26	18.1071	40360.2	32684.7	0.809825	26796	15341	21112	25027	17174	20066	12196	12319	14134	27727	25299	24739	61045	109164	109394	96431	38622.8
unknown1047	0.00164724	0.0383121	24	21	562.327	0.0671977	0.589446	26.4865	17.9999	1856.74	0.00111895	0.027492	25.2432	19.6214	915.082	697.687	0.76243	1417	633	593	550	447	310	295	268	378	777	698	292	1166	1603	2401	2257	880.312
unknown1087	0.00164724	0.0383121	18	3	791.606	0.503105	1	27.1385	6.63e-05	8481.25	0.00670912	0.0556347	22.5692	1.8808	8811.24	3741.41	0.424618	8923	8946	8106	7950	7473	9763	8321	7473	7920	6804	7616	4365	9980	14044	15510	9382	8911
unknown1162	0.00164724	0.0383121	24	21	878.934	0.584588	1	25.4179	17.9999	4625.48	0.00765118	0.0589003	24.7089	19.5591	2573.91	1805.69	0.701537	2355	2607	4400	1831	1389	1243	1047	1067	1648	1720	1544	985	2123	4046	10208	2125	2521.12
unknown1196	0.00164724	0.0383121	24	21	5223.75	0.0473254	0.589446	27.6489	17.9999	17629.4	0.000815374	0.0246668	25.8245	19.7043	6904.17	6865.29	0.994369	9347	2332	2298	2488	2030	1948	1547	1436	2582	1971	2814	1367	14715	20677	20030	15096	6417.38
unknown1281	0.00164724	0.0383121	24	21	1882.32	0.201055	0.662917	24.7059	17.9999	9418.48	0.00298492	0.0400851	24.3529	19.5258	7026.56	2411.28	0.343167	11512	6277	6220	7203	5492	5864	4752	5051	6132	5491	6667	3518	7686	11891	10302	7795	6990.81
unknown130	0.00164724	0.0383121	18	12	5995.56	0.642685	1	20	12	68894.2	0.00831126	0.0609108	19	12.0333	42053	33921.8	0.806645	15961	33920	49034	33812	35569	45006	44385	43053	43025	44984	45380	142188	11758	5768	5760	9128	38045.7
unknown1423	0.00164724	0.0383121	24	3	1291.18	0.0336681	0.589446	28	7.77e-05	2693.49	0.000598954	0.0226999	26	1.62504	1328.91	269.447	0.202758	3122	1995	3145	2512	1907	1278	1908	1830	1035	1762	138	52	54	165	192	86	1323.81
unknown1668	0.00164724	0.0383121	24	21	2265.92	0.0780541	0.589446	25.7143	17.9999	8170.72	0.00128047	0.0290552	24.8571	19.575	4995.63	2621.85	0.524829	7779	4707	3650	4395	3565	3625	2474	2820	3547	3522	4207	1485	6449	9068	9790	7376	4903.69
unknown1779	0.00164724	0.0383121	24	18	1585.69	0.102138	0.589446	27.4766	17.9999	4876.49	0.00163032	0.0310861	25.7383	18.0825	3110.36	1192.38	0.383359	3266	1807	2255	1772	2172	1831	1574	1796	2256	2418	5775	2433	4547	5896	4254	4809	3053.81
unknown1887	0.00164724	0.0383121	24	18	2977.45	0.0656004	0.589446	28	17.9999	9929.98	0.00109495	0.0272858	26	18.1071	6008.05	2634.72	0.438531	4582	4747	4117	3349	3580	3799	2554	3537	3996	4250	10527	5130	8806	10449	12177	8288	5868
unknown1959	0.00164724	0.0383121	24	21	2006.77	0.0745944	0.589446	24.2975	17.9999	7982.98	0.00122928	0.0285911	24.1488	19.5099	6181.51	2000.93	0.323696	9217	6872	5890	6027	5487	5382	3709	3629	5417	4611	6585	3944	7739	8414	8289	7490	6168.88
unknown2067	0.00164724	0.0383121	24	18	17418.2	0.0573433	0.589446	26.9725	17.9999	58936.1	0.000969837	0.0257792	25.4862	18.0614	31417.1	21313.1	0.678393	45445	13580	19249	18848	16175	18400	10160	8483	27639	14531	35698	24535	44525	74277	66023	50920	30530.5
unknown301	0.00164724	0.0383121	24	21	1854.74	0.0429646	0.589446	27.3065	17.9999	8043.72	0.000747083	0.0246668	25.6533	19.6784	4378.94	2440.63	0.557356	4947	2725	3125	3545	2654	3349	2416	1878	2856	3247	2715	1899	7092	9064	7648	8371	4220.69
unknown347	0.00164724	0.0383121	24	21	19741.2	0.0521311	0.589446	27.1385	17.9999	71230.5	0.000889866	0.0254426	25.5692	19.6661	36848.1	23329.7	0.633132	45705	31794	22891	15812	25781	12571	13384	14583	18493	31840	31679	17037	53761	73326	92405	65431	35405.8
unknown425	0.00164724	0.0383121	24	21	2295.27	0.0459345	0.589446	27.4766	17.9999	8942.71	0.000793667	0.0246668	25.7383	19.6911	3932.53	3271.43	0.831889	4380	2337	1690	2127	2321	1611	335	528	1677	2653	2632	1306	6597	7918	11902	9354	3710.5
unknown449	0.00164724	0.0383121	24	6	11325.7	0.0401587	0.589446	28	6.63e-05	21864	0.000702761	0.0246668	26	3.25003	14321.6	6994.87	0.488414	13902	18793	26039	28722	19571	21085	19126	27096	20555	10944	5099	11399	3348	1433	1623	2231	14435.4
unknown580	0.00164724	0.0383121	24	21	4233.45	0.0477465	0.589446	27.8233	17.9999	15263.4	0.000821932	0.0246668	25.9117	19.718	5799.8	5962.25	1.02801	7376	1735	1681	1960	1724	1446	1284	915	1925	1673	2163	806	12997	18096	17243	12718	5358.88
unknown733	0.00164724	0.0383121	18	3	334.462	0.150957	0.602253	26.9725	6.63e-05	3778.24	0.00231241	0.0356571	22.4862	1.87388	4051.05	3400.06	0.839304	6155	2790	2635	3533	3114	2299	2491	2818	2595	2609	2377	1661	5957	11125	8508	5717	4149
unknown766	0.00164724	0.0383121	18	3	107.48	0.0687778	0.589446	26.1721	6.63e-05	1408	0.00114263	0.027492	22.0861	1.84053	1375.33	894.527	0.650407	2047	1299	1122	1164	898	1024	906	907	951	893	1184	603	1980	2769	2819	2013	1411.19
unknown91	0.00164724	0.0383121	18	3	106.95	0.0917591	0.589446	25.7143	6.63e-05	781.499	0.00148085	0.0310861	21.8571	1.82146	737.928	345.708	0.468485	854	585	769	918	414	668	731	596	500	617	624	413	1069	1160	1238	912	754.25
unknown920	0.00164724	0.0383121	24	18	4801.79	0.0527994	0.589446	26.0177	17.9999	22559.7	0.000900167	0.0254426	25.0088	18.0293	16316.3	5323.17	0.326248	18612	14527	12205	14407	11154	13778	8358	11960	12956	12587	21849	15903	21879	23583	21342	23435	16158.4
unknown94	0.00164724	0.0383121	24	0	4405.28	0.255765	0.729532	24.4321	6.63e-05	44282.4	0.00369577	0.0424481	24.2161	3.29e-05	38338.4	7175.35	0.187158	45013	41312	39149	51656	38541	37502	28204	35431	37352	34993	37831	23128	38994	41659	39387	42469	38288.8
unknown1625	0.00215962	0.0469027	24	21	944.341	0.0496178	0.589446	27.4766	6.63e-05	1136.75	0.00108669	0.0272858	25.7383	24.1297	1617.88	1530.66	0.946086	1935	768	876	968	811	816	549	486	876	723	702	348	2893	4376	3705	3412	1515.25
4-Pyridoxic acid	0.00267199	0.0469027	24	3	339.765	0.149764	0.602253	28	6.63e-05	1150.25	0.00353095	0.0417939	26	1.62503	612.538	219.859	0.35893	1895	963	726	1017	718	667	508	641	687	513	106	42	250	410	358	233	608.375
Citrulline	0.00267199	0.0469027	18	3	232.992	0.658462	1	26.0177	17.9999	3682.73	0.0129189	0.0766117	22.0088	20.4517	1697.03	1313.78	0.774162	1114	1755	3285	1389	1053	800	762	723	725	1019	1025	706	1624	3020	8530	1557	1817.94
unknown1222	0.00267199	0.0469027	24	21	1707.84	0.0487824	0.589446	26.1721	17.9999	5226.73	0.00129633	0.029178	25.0861	19.6016	2871.4	1798.73	0.62643	4373	2616	1910	1748	1952	1228	1027	1075	1438	2761	2575	1069	4172	5518	6153	5064	2792.44
unknown1271	0.00267199	0.0469027	24	21	817.415	0.0612133	0.589446	26.9725	17.9999	3540.49	0.00158954	0.0310861	25.4862	19.6543	1961.6	1081.47	0.551321	2150	1175	1704	1699	875	1472	1260	1129	1280	1308	1220	934	3211	4507	2741	3703	1898
unknown1286	0.00267199	0.0469027	24	21	2549.12	0.0784042	0.589446	26.6465	17.9999	7597.48	0.00198409	0.0331593	25.3233	19.632	4089.55	2412.52	0.589922	5674	2820	1950	2642	1506	2210	943	1684	1901	1995	6843	2836	5741	9769	7428	7452	3962.12
unknown1370	0.00267199	0.0469027	24	6	4151.78	0.16098	0.61212	28	6.63e-05	7762.49	0.00376431	0.0430582	26	3.25003	4250.78	1278.06	0.300665	13008	3396	7462	7184	9416	2647	7815	4809	1710	6556	2555	444	325	347	441	230	4271.56
unknown1542	0.00267199	0.0469027	24	18	3067.78	0.0304263	0.589446	28	17.9999	11434.2	0.000846922	0.024977	26	18.1071	5069.37	3802.31	0.750055	4904	2240	1482	1711	2978	1844	1023	1701	2067	2804	5368	4017	10534	11322	13175	10706	4867.25
unknown1686	0.00267199	0.0469027	24	21	903.152	0.105358	0.589446	23.9024	17.9999	3332.74	0.00258301	0.0380925	23.9512	19.497	2381.44	1014.45	0.425982	3845	2953	2098	2144	1746	1644	1000	1310	2813	2168	1943	1142	2577	3803	3923	3028	2383.56
unknown1704	0.00267199	0.0469027	24	18	3149.45	0.0614919	0.589446	27.3065	17.9999	10839.2	0.00159603	0.0310861	25.6533	18.075	6864.79	2898.14	0.422175	8259	5801	3886	3585	4936	3728	3493	4234	5619	5324	9721	5784	9819	11987	12705	8846	6732.94
unknown1717	0.00267199	0.0469027	24	3	3150.51	0.0258722	0.589446	28	4.47e-05	6134.74	0.000731367	0.0246668	26	1.62502	2872.58	1169.34	0.407071	7391	6142	6301	4705	6005	3076	3284	2978	1567	2969	244	123	156	312	152	202	2850.44
unknown1731	0.00267199	0.0469027	24	6	4294.26	0.0599754	0.589446	26.9725	6.00001	20459.2	0.00156067	0.0310861	25.4862	6.02048	16346.7	3351.81	0.205045	16373	19439	20267	19085	24629	18312	17620	21276	16889	19029	15636	11958	7776	10334	12675	12939	16514.8
unknown1793	0.00267199	0.0469027	24	21	1616.8	0.0522645	0.589446	27.4766	17.9999	10463.7	0.00137924	0.0300843	25.7383	19.6911	7093.24	2180.57	0.307416	7633	6145	5751	5277	5487	5666	4724	5223	5970	5571	6904	4918	9121	12344	10968	9422	6945.25
unknown1814	0.00267199	0.0469027	18	3	370.17	0.067383	0.589446	25.2722	17.9999	8727.73	0.00173247	0.0310861	21.6361	20.3261	5680.46	2235.61	0.393562	8200	4741	5394	7415	5392	5043	3029	3460	4965	4869	4536	2823	7173	9353	9167	9218	5923.62
unknown1904	0.00267199	0.0469027	24	21	1771.66	0.0305553	0.589446	26.8085	17.9999	6889.48	0.000850166	0.024977	25.4043	19.6429	3911.44	2034.78	0.520213	4751	1839	3075	3370	1355	1644	2343	2782	2123	3580	3418	2928	6773	7469	6107	7209	3797.88
unknown2008	0.00267199	0.0469027	24	6	2974.62	0.0435274	0.589446	28	6.63e-05	6106.5	0.00116995	0.0279087	26	3.25003	3671.41	1192.98	0.324937	6725	3496	7426	6779	4857	4176	7209	4840	2427	4800	2929	1030	619	638	588	514	3690.81
unknown2038	0.00267199	0.0469027	24	18	1991.92	0.0635224	0.589446	27.1385	17.9999	5801.74	0.00164322	0.0310861	25.5692	18.068	3468.91	1595.2	0.459856	2708	2791	2433	1456	1998	1910	1050	1848	2315	2155	6548	3972	6098	5768	6698	4643	3399.44
unknown2143	0.00267199	0.0469027	24	21	1421.28	0.0654353	0.589446	24.8451	17.9999	4212.99	0.00168752	0.0310861	24.4225	19.5318	2697.86	1469.59	0.544725	3934	1700	2742	3836	1374	2075	1036	1384	2130	1884	2659	1144	3458	4474	5362	3558	2671.88
unknown229	0.00267199	0.0469027	24	18	631.446	0.0564115	0.589446	27.3065	17.9999	5392.74	0.00147717	0.0310861	25.6533	18.075	4482.99	666.166	0.148598	4232	3766	3996	4559	3901	4067	3456	3935	3802	4431	4916	4611	4767	5324	5913	5567	4452.69
unknown26	0.00267199	0.0469027	24	6	2148.54	0.122301	0.589446	25.7143	6.00001	4507.75	0.00294965	0.0400851	24.8571	6.00715	2752.97	1201.54	0.436453	5015	1820	5012	3412	6872	2273	4370	4516	1440	3871	2133	888	691	752	907	625	2787.31
unknown324	0.00267199	0.0469027	24	6	1332.9	0.095448	0.589446	24.9858	5.99999	3976.25	0.00236523	0.035877	24.4929	6.00243	2843.63	551.136	0.193814	2889	2648	5228	4397	3740	2676	5300	4189	2479	2549	1941	1173	1231	2031	1241	1930	2852.62
unknown42	0.00267199	0.0469027	24	6	14907.4	0.032896	0.589446	28	6.00001	35364	0.000908805	0.0254426	26	6.03572	21985.9	11754.6	0.534641	20856	21805	42251	41062	32433	37468	36760	34795	30400	26126	14377	19577	2265	1528	1263	1606	22785.8
unknown476	0.00267199	0.0469027	24	0	480.833	0.131099	0.592036	23.6461	6.63e-05	1721.5	0.0031375	0.0401522	23.8231	3.34e-05	1388.13	582.218	0.419427	2003	1305	1515	2063	681	1294	1327	1323	1029	1275	977	604	1341	1829	1715	1984	1391.56
unknown479	0.00267199	0.0469027	24	18	5211.38	0.143564	0.597406	26.3284	17.9999	12429.2	0.00340099	0.0416025	25.1642	18.0386	6895.67	4176.37	0.605651	12291	2549	1785	2342	3920	2236	1410	1961	5711	4147	13618	6393	10970	15487	14028	9232	6755
unknown626	0.00267199	0.0469027	24	6	3993.21	0.0330078	0.589446	28	6.63e-05	8775.75	0.000911595	0.0254426	26	3.25003	5663.74	1695.15	0.299299	6454	9030	8901	10718	5389	10193	7460	9401	6187	6637	4783	2990	920	862	673	463	5691.31
unknown718	0.00267199	0.0469027	24	21	647.887	0.0392682	0.589446	28	17.9999	5255.73	0.00106627	0.0272858	26	19.7321	3217.07	1233.72	0.383493	2988	2754	2446	2122	2303	2310	2062	2349	2394	2473	2711	2018	4722	5733	5648	4920	3122.06
unknown812	0.00267199	0.0469027	24	21	789.131	0.126734	0.589446	24.2975	17.9999	4166.24	0.00304452	0.0400851	24.1488	19.5099	3395.44	891.575	0.26258	4622	3445	3091	4062	2790	3015	2431	2659	3087	2862	3169	2339	3239	5105	4493	3828	3389.81
unknown814	0.00267199	0.0469027	24	0	3818.02	0.112962	0.589446	24.5682	6.63e-05	11750.2	0.00274838	0.0387411	24.2841	3.28e-05	7204.01	5367.57	0.745081	18744	9637	6783	11837	5834	5493	1987	4734	5743	2864	3301	2186	7528	10949	9867	7003	7155.62
unknown850	0.00267199	0.0469027	24	21	3756.86	0.0398497	0.589446	28	17.9999	30919.6	0.0010805	0.0272858	26	19.7321	14767.3	9711	0.6576	6981	11862	10369	9699	6774	6081	8713	8201	9562	7675	6766	7950	25889	31716	35652	30422	14019.5
unknown883	0.00267199	0.0469027	24	21	807.162	0.0416982	0.589446	27.4766	17.9999	3827.23	0.00112556	0.027492	25.7383	19.6911	1828.32	1313.36	0.718338	1661	1054	1062	1705	898	1171	750	698	885	1166	910	558	3093	3847	4276	4093	1739.19
unknown889	0.00267199	0.0469027	24	6	3598.29	0.0341458	0.589446	28	6.63e-05	9566.24	0.000939933	0.0257191	26	3.25003	6554.48	800.609	0.122147	8207	8010	10142	11906	8236	10027	7246	9109	8184	6818	6844	4970	1779	1267	1125	1210	6567.5
unknown939	0.00267199	0.0469027	18	3	605.283	0.0661115	0.589446	27.3065	6.63e-05	3145.25	0.00170314	0.0310861	22.6533	1.8878	3724.43	3787.09	1.01682	3795	1940	3001	3845	1612	3007	2848	1740	2024	2380	1960	1013	7318	9581	6725	8290	3817.44
Caffeic acid	0.00344533	0.0514162	24	21	97.2272	0.0385944	0.589446	28	17.9999	1228.74	0.00131978	0.0294681	26	19.7321	550.841	377.76	0.685789	380	321	243	284	291	260	227	239	273	321	326	268	1149	1447	1042	1277	521.75
unknown1336	0.00344533	0.0514162	18	3	89.8026	0.0576125	0.589446	28	6.63e-05	612.499	0.00189061	0.0323004	23	1.91669	920.124	1163.93	1.26497	710	585	603	552	351	707	396	336	467	603	339	165	1742	2743	2571	2161	939.438
unknown408	0.00344533	0.0514162	24	21	506.996	0.127771	0.589446	25.5652	6.63e-05	2659.5	0.00384228	0.0432999	24.7826	23.2337	2593.4	571.718	0.220451	2684	2252	2809	2893	2040	2745	2005	2348	2252	2269	2066	2100	2981	2903	3126	3728	2575.06
unknown481	0.00344533	0.0514162	24	21	906.864	0.0573862	0.589446	27.8233	17.9999	3094.73	0.00188396	0.0323004	25.9117	19.718	1174.21	1207.97	1.02875	1573	384	283	326	289	299	282	206	379	292	460	206	2536	3714	3755	2374	1084.88
1-Methyladenosine	0.00421867	0.0514162	24	3	17565.6	0.0205228	0.589446	28	5.53e-05	51281	0.000896479	0.0254426	26	1.62503	33427.7	3105.02	0.0928878	59103	46380	46803	52838	36140	43819	38004	44401	30290	27866	31084	14318	15456	19267	16524	11609	33368.9
Acetyl-L-threonine	0.00421867	0.0514162	24	3	3782.67	0.0415137	0.589446	28	6.63e-05	9275.23	0.00169002	0.0310861	26	1.62503	4687.24	976.595	0.208352	11817	9172	7118	8994	6506	6525	3489	4404	4683	4178	1523	611	1021	1777	1734	1148	4668.75
Arg-Asp	0.00421867	0.0514162	24	21	1951.61	0.150732	0.602253	25.7143	17.9999	9656.23	0.00531635	0.0495045	24.8571	19.575	7131.03	2091.34	0.293274	9076	7373	5799	6473	6386	5635	4228	5454	5482	5638	8553	4201	9403	9312	11854	8056	7057.69
Asn-Asn	0.00421867	0.0514162	24	18	837.568	0.0422932	0.589446	27.8233	17.9999	2998.74	0.00171844	0.0310861	25.9117	18.0985	1769.44	851.19	0.48105	1609	1398	1231	905	1408	1006	611	910	1061	1214	2092	2173	2957	2766	3717	2555	1725.81
Hypoxanthine	0.00421867	0.0514162	18	3	17313.3	0.0791597	0.589446	24.2975	6.63e-05	109614	0.00300705	0.0400851	21.1488	1.76243	78702.9	59391.9	0.754634	174958	88983	69158	105357	56430	50315	26388	54688	69941	29525	32863	34520	112733	167603	156685	97829	82998.5
N-(2-Furoyl)glycine	0.00421867	0.0514162	24	21	1668.06	0.0381081	0.589446	27.8233	17.9999	5953.47	0.00156514	0.0310861	25.9117	19.718	2377	2255.59	0.948924	2952	892	775	903	912	687	536	498	974	837	1046	537	5753	6706	5828	5527	2210.19
N-Methylglutamic acid	0.00421867	0.0514162	24	21	149.2	0.03986	0.589446	26.8085	6.63e-05	241.499	0.00162954	0.0310861	25.4043	23.8165	278.23	216.328	0.777513	291	257	137	281	170	168	73	154	111	159	206	87	531	621	505	509	266.25
Stachydrine	0.00421867	0.0514162	24	18	583.01	0.0660841	0.589446	25.4179	17.9999	4518.74	0.00256068	0.0380925	24.7089	18.0148	3572.33	869.389	0.243368	4372	3294	3284	2941	3464	2881	2283	2533	3440	3028	3676	3587	4081	4960	4368	4666	3553.62
Thr-Arg	0.00421867	0.0514162	24	3	14200.1	0.11389	0.589446	28	6.63e-05	73901.6	0.00415156	0.0442184	26	1.62503	54210.6	8405.09	0.155045	83582	78711	65302	68012	52310	54542	47917	62885	63468	42394	47441	22640	41277	45252	47871	41219	54051.4
unknown1	0.00421867	0.0514162	24	6	9905.86	0.0536038	0.589446	28	5.99997	26082.2	0.00212441	0.0345948	26	6.0357	19101.8	5209.12	0.272703	20748	22531	26535	34004	25367	29611	24197	25154	25129	23320	16179	8235	6644	9202	7044	7400	19456.2
unknown111	0.00421867	0.0514162	24	6	4542.45	0.0437378	0.589446	26.3284	5.99998	8959.25	0.00177094	0.0310861	25.1642	6.01286	5459.87	2235.84	0.409504	10295	5146	8042	8336	9961	7654	11596	6626	5109	7242	2527	1066	1546	1282	1178	1149	5547.19
unknown1244	0.00421867	0.0514162	24	18	1372.14	0.106678	0.589446	28	17.9999	5215.49	0.00391811	0.0432999	26	18.1071	2809.06	1427.36	0.508128	2260	1336	1504	1429	1645	1292	1276	1279	1291	2034	5508	2015	3269	5828	6910	4855	2733.19
unknown1354	0.00421867	0.0514162	24	3	2246.12	0.0422978	0.589446	28	6.63e-05	4724.49	0.00171861	0.0310861	26	1.62503	2183.18	316.371	0.144913	5011	4861	5526	3500	3389	2445	1903	2258	1567	2958	215	130	231	424	207	210	2177.19
unknown1420	0.00421867	0.0514162	24	21	11438.5	0.0802484	0.589446	26.6465	17.9999	33142.6	0.00304378	0.0400851	25.3233	19.632	17600.9	10600.9	0.602291	25384	12047	7354	11051	6482	9468	4359	6863	8391	8697	28788	11201	25033	42810	32333	32395	17041
unknown1434	0.00421867	0.0514162	24	18	2621.95	0.0563167	0.589446	27.6489	17.9999	9190.97	0.0022202	0.0348122	25.8245	18.0903	5185.14	2827.21	0.545253	6457	4250	1983	2320	4165	2516	1424	2564	3284	3860	6640	4503	7854	10192	10826	7892	5045.62
unknown1533	0.00421867	0.0514162	24	21	3001.31	0.0852326	0.589446	24.7059	17.9999	11564.2	0.00321116	0.0405536	24.3529	19.5258	8350.63	3263.39	0.390795	12293	7477	7747	10166	4385	7684	5564	6340	8066	6192	5651	5014	9200	13921	12750	10386	8302.25
unknown1585	0.00421867	0.0514162	24	21	7490.91	0.0811367	0.589446	26.6465	17.9999	27250.9	0.0030737	0.0400874	25.3233	19.632	14238.5	9112.2	0.639967	12228	11048	15459	7861	5373	7921	3169	6084	4569	5695	14497	17208	29765	18585	21432	39222	13757.2
unknown1766	0.00421867	0.0514162	18	3	147.432	0.0436702	0.589446	28	6.63e-05	3195.5	0.00176848	0.0310861	23	1.91669	4698.65	4913.66	1.04576	4129	2899	2915	2839	2185	2566	2815	3074	2425	2695	3439	1595	10542	9856	11781	10728	4780.19
unknown1774	0.00421867	0.0514162	24	21	986.944	0.0434654	0.589446	28	6.63e-05	2008.75	0.00176105	0.0310861	26	24.375	4663.45	5137.75	1.1017	2296	1463	2049	2227	1469	2160	1363	1207	1642	1841	1714	896	9789	12125	13406	12740	4274.19
unknown1802	0.00421867	0.0514162	24	21	1470.07	0.094274	0.589446	26.0177	17.9999	6589.23	0.0035117	0.0417939	25.0088	19.5924	4477.37	1623.88	0.362686	6096	2417	4230	4347	1894	2947	3164	3725	3629	4181	4405	3182	6030	8317	5407	6603	4410.88
unknown1898	0.00421867	0.0514162	24	21	1015.94	0.129781	0.592031	24.2975	6.63e-05	3635.49	0.00465932	0.047062	24.1488	22.6395	3108.71	1123.05	0.361258	5123	3324	2952	3143	2866	2903	1802	1882	2514	2103	3058	1744	3916	4299	4626	3371	3101.62
unknown2022	0.00421867	0.0514162	24	9	46072.2	0.0254642	0.589446	26.8085	6	130228	0.00108915	0.0272858	25.4043	7.60616	80241.9	48344.2	0.60248	79878	75671	114760	120498	86442	141724	146762	145982	90330	118053	93250	92561	10334	4452	4025	5684	83150.4
unknown2113	0.00421867	0.0514162	24	9	3389.52	0.115404	0.589446	20.5594	6	14555.8	0.00420032	0.0442381	22.2797	7.42847	10651.2	3765.21	0.3535	4214	8294	11404	9179	14588	15714	11625	16296	13293	9439	8320	12983	8589	7108	5835	9173	10378.4
unknown272	0.00421867	0.0514162	24	6	10034.6	0.0410502	0.589446	28	6.63e-05	34926	0.0016731	0.0310861	26	3.25003	25271	1865.56	0.0738221	31800	29471	36271	42162	29794	37991	30437	37864	29766	29145	28877	36268	2005	1053	852	1065	25301.3
unknown370	0.00421867	0.0514162	24	21	4397.5	0.04369	0.589446	27.4766	17.9999	16940.7	0.0017692	0.0310861	25.7383	19.6911	7449.65	6127.02	0.822458	8299	4440	3222	3789	4567	3121	767	1039	3079	4732	4692	3031	13246	15525	22489	16503	7033.81
unknown439	0.00421867	0.0514162	24	6	707.107	0.109135	0.589446	26.9725	5.99999	5419.25	0.00399787	0.043757	25.4862	6.02047	4777.57	630.372	0.131944	4233	5268	5359	5408	4620	5557	5617	5883	5378	4877	5030	4221	4285	3626	3609	3976	4809.19
unknown447	0.00421867	0.0514162	24	6	27012.9	0.0746585	0.589446	27.6489	6	58778.5	0.0028545	0.0400347	25.8245	6.0301	37940.1	13031.9	0.343487	81265	33592	50748	57347	76762	37515	72071	48766	27716	50816	29163	12563	10541	12729	11341	7015	38746.9
unknown451	0.00421867	0.0514162	24	21	989.242	0.143446	0.597406	26.0177	17.9999	4960.49	0.00508933	0.049225	25.0088	19.5924	3681.88	1027.33	0.279022	4327	3793	3505	3079	3298	3195	2652	2565	2758	3018	4319	1886	4893	5865	4718	4366	3639.81
unknown465	0.00421867	0.0514162	18	3	3902.52	0.0756647	0.589446	24.2975	6.63e-05	21963.7	0.0028887	0.0400851	21.1488	1.76243	16198.2	11368.1	0.701816	31982	18485	13902	23486	11487	10655	5549	13180	15197	6404	8022	6842	23114	33586	31120	19315	17020.4
unknown472	0.00421867	0.0514162	24	6	6324.72	0.0557675	0.589446	26.6465	5.99999	15179.5	0.00220085	0.0347039	25.3233	6.01642	10026.8	3257.55	0.324883	18663	9336	13210	14295	16293	12497	19751	12177	7751	13195	7399	3182	3986	4724	3861	2430	10171.9
unknown493	0.00421867	0.0514162	24	21	1421.99	0.0838683	0.589446	26.9725	6.63e-05	4938.99	0.00316547	0.0401583	25.4862	23.8934	5419.13	2290.93	0.42275	4621	3847	5745	5543	3971	4480	3859	3705	4298	4815	4044	2637	6082	8726	9254	8942	5285.56
unknown520	0.00421867	0.0514162	24	3	8775.9	0.0184508	0.589446	28	4.85e-05	19930.7	0.000814251	0.0246668	26	1.62502	11099.8	1808.47	0.162928	22672	17998	17473	21580	15901	16163	11681	13039	9857	9987	6609	2620	2943	3230	2828	2468	11065.6
unknown546	0.00421867	0.0514162	24	21	575.408	0.141869	0.596796	26.0177	17.9999	6343.49	0.00504002	0.049225	25.0088	19.5924	5530.48	631.394	0.114166	4777	5590	5747	5792	5556	5307	4394	4689	5745	5059	5188	4856	6912	6363	6131	5968	5504.62
unknown565	0.00421867	0.0514162	24	21	3033.49	0.0375374	0.589446	28	17.9999	20908.7	0.0015441	0.0310861	26	19.7321	10242	6360.82	0.621051	9248	6037	5404	6531	5617	6511	4409	4581	5638	6241	7470	4713	17468	21316	23174	21677	9752.19
unknown633	0.00421867	0.0514162	24	18	3167.48	0.0774422	0.589446	28	17.9999	10641.7	0.00294897	0.0400851	26	18.1071	5906.67	2787.44	0.471914	5799	2638	4347	2108	6631	1909	1981	2464	2602	4851	8633	5606	10130	10754	12860	8823	5758.5
unknown666	0.00421867	0.0514162	24	18	1874.89	0.0891063	0.589446	27.4766	17.9999	6919.23	0.0033404	0.0414358	25.7383	18.0825	4317.82	1866.18	0.432204	5666	2785	2112	3138	4094	2349	1763	2424	2609	3656	6069	3327	7046	6628	7762	6241	4229.31
unknown683	0.00421867	0.0514162	24	6	5131.83	0.060371	0.589446	28	6.63e-05	10498.5	0.00236233	0.035877	26	3.25003	6886.73	3463.4	0.502909	11972	6033	11520	12469	13816	8061	11236	8276	5203	10546	4228	1773	1152	1775	1615	1414	6943.06
unknown774	0.00421867	0.0514162	24	18	2608.87	0.0524898	0.589446	28	17.9999	8226.73	0.00208491	0.0344319	26	18.1071	4949.35	1877.21	0.379283	4375	3143	3165	3037	3769	3251	2765	2893	3470	3335	7435	4048	7316	9053	9323	7215	4849.56
unknown788	0.00421867	0.0514162	24	6	10133.9	0.0376159	0.589446	28	4.17e-05	37495	0.00154699	0.0310861	26	3.25002	25783.2	530.344	0.0205693	34527	31089	40058	44306	31194	35629	31968	37470	30547	30341	27949	32509	1851	1089	932	1211	25791.9
unknown795	0.00421867	0.0514162	24	18	1336.43	0.0709053	0.589446	26.6465	17.9999	4795.49	0.00272643	0.0386267	25.3233	18.0493	2796.89	1596.88	0.570948	2707	1625	1083	3566	2238	1337	756	989	1511	1880	4397	2517	4632	5282	5192	4076	2736.75
unknown797	0.00421867	0.0514162	24	6	3485.33	0.0334038	0.589446	28	6.63e-05	11531.7	0.0013905	0.0300843	26	3.25003	8760.04	1604.09	0.183114	10183	10899	11320	13725	9623	11950	9829	11774	10372	8492	6894	5679	4727	5427	5467	4217	8786.12
unknown819	0.00421867	0.0514162	24	6	46458.3	0.080142	0.589446	28	6.63e-05	100715	0.00304019	0.0400851	26	3.25003	66022.1	21385.8	0.323919	141551	60876	95746	104688	112328	60924	104839	90103	47405	96434	52114	20268	19836	19491	22632	12683	66369.9
unknown824	0.00421867	0.0514162	18	3	130.815	0.0435584	0.589446	28	17.9999	10388	0.00176443	0.0310861	23	9.3095	4092.26	3234.44	0.790381	3945	2721	1824	2463	1643	1773	1929	2095	1967	1612	2772	1582	8669	9358	12340	11185	4242.38
unknown831	0.00421867	0.0514162	24	3	760.847	0.126934	0.589446	26.4865	6.63e-05	4518.74	0.00456899	0.0465022	25.2432	1.57773	3299.47	1095.15	0.331917	5012	4303	3398	5362	2699	3228	3366	3894	3090	2702	2683	1049	2289	2774	3184	3487	3282.5
unknown835	0.00421867	0.0514162	24	9	4477.75	0.106841	0.589446	26.3284	12	10836.2	0.00392343	0.0432999	25.1642	10.453	7635.86	4430.92	0.580278	4215	5873	11310	10724	7443	11909	9618	12585	11448	8750	11341	11806	2196	2261	1593	2626	7856.12
unknown841	0.00421867	0.0514162	24	6	12051.2	0.0919118	0.589446	28	6.63e-05	23357.7	0.00343355	0.0416025	26	3.25003	14970.7	5947.15	0.397254	27519	12420	26738	26754	30372	12919	23781	19794	9285	24060	10140	4164	2940	3440	3942	2810	15067.4
unknown871	0.00421867	0.0514162	24	21	765.266	0.0807049	0.589446	23.9024	17.9999	6347.74	0.00305916	0.0400851	23.9512	19.497	5595.18	840.573	0.150232	5990	5801	5966	6020	4410	4888	4621	5335	5851	5425	5283	4570	5888	7136	6734	5633	5596.94
unknown1550	0.00536208	0.0621809	24	18	10869.6	0.0421016	0.589446	28	17.9999	23352.4	0.00212118	0.0345948	26	18.1071	10244.7	7186.37	0.701472	6099	3481	2178	1929	3481	2939	2152	2554	2689	4708	19032	13151	18731	28458	26985	19236	9862.69
1-Palmitoyl-sn-glycero-3-phosphocholine	0.0065055	0.0621809	24	18	61406	0.0982169	0.589446	26.9725	17.9999	203677	0.00533886	0.0495045	25.4862	18.0614	97770.1	80815.9	0.826592	166347	33931	50001	49468	35329	53365	27119	23784	68118	34895	97873	55590	150723	264565	259341	140083	94408.2
Ala-Asp	0.0065055	0.0621809	24	18	25350.1	0.0641627	0.589446	28	17.9999	62486.9	0.00366546	0.042274	26	18.1071	35951.3	13845.8	0.385126	32877	13100	16314	14892	29337	14292	14545	17149	23908	33940	70786	32356	53851	76401	66891	52805	35215.2
Asp-Gln	0.0065055	0.0621809	24	21	503.283	0.0535402	0.589446	27.6489	17.9999	3003.49	0.00312167	0.0401522	25.8245	19.7043	1898.21	708.081	0.373026	1718	1241	1888	1535	1391	1630	1088	1175	1622	1589	1525	1152	2912	2745	3705	2652	1848
Chlorogenic acid	0.0065055	0.0621809	24	21	535.28	0.0353259	0.589446	28	17.9999	3041.74	0.00215524	0.0345948	26	19.7321	1355.5	1036.39	0.764581	1197	1050	473	638	558	653	372	589	702	581	991	440	2688	2895	3274	3310	1275.69
N-Acetylserine	0.0065055	0.0621809	24	3	1894.34	0.0568487	0.589446	28	6.63e-05	6209.73	0.00329239	0.0411873	26	1.62503	3402.56	412.341	0.121186	7957	6218	4603	6061	4261	3773	2252	3205	3198	2944	2093	1086	1444	1934	1715	1572	3394.75
Nicotinamide	0.0065055	0.0621809	24	18	950.352	0.0429743	0.589446	28	17.9999	6266.98	0.00256707	0.0380925	26	18.1071	3039.72	2099.36	0.690642	2940	1876	1476	1973	1382	1574	1515	1505	1344	2007	2096	2094	5406	6421	7985	5256	2928.12
Phthalic acid	0.0065055	0.0621809	24	0	910.577	0.0930323	0.589446	25.7143	6.63e-05	4797.49	0.00508986	0.049225	24.8571	3.21e-05	3548.03	1158.13	0.326415	4018	5184	4415	5573	2868	3305	2218	3233	2322	2867	2958	2898	3639	3800	2562	4437	3518.56
S-Adenosyl-methionine	0.0065055	0.0621809	24	0	873.454	0.0503543	0.589446	23.9024	6.63e-05	4086.49	0.002956	0.0400851	23.9512	3.32e-05	3415.46	1075.04	0.314757	4456	3811	3868	4211	2308	3694	2777	2936	2946	2588	3084	2082	3613	4503	3989	3809	3417.19
unknown1007	0.0065055	0.0621809	24	18	1714.38	0.137403	0.596796	22.5575	17.9999	3553	0.00716881	0.0573299	23.2788	18.0173	2286.97	670.264	0.293079	1962	1531	582	1387	850	1032	493	716	1198	2519	5997	4386	3106	4069	4692	2345	2304.06
unknown1118	0.0065055	0.0621809	24	18	1543.61	0.0808603	0.589446	28	17.9999	4858.49	0.00449769	0.0459818	26	18.1071	2895.83	1146.68	0.395978	2600	2277	1261	1431	2582	1385	1181	1662	1820	2671	4954	2100	3965	5140	5939	4390	2834.88
unknown1167	0.0065055	0.0621809	24	3	1900	0.256669	0.730715	28	6.63e-05	7352.23	0.012348	0.0747929	26	1.62503	3756.92	520.79	0.138621	13479	6030	4581	5319	3881	3958	3203	3612	3982	3105	1705	771	1191	2094	1845	1197	3747.06
unknown1170	0.0065055	0.0621809	24	3	1565.53	0.0540992	0.589446	28	5.32e-05	5437.99	0.0031506	0.0401522	26	1.62502	3535.67	147.473	0.0417102	6886	4625	4460	5781	4176	4278	3136	4161	3225	3062	3617	1477	1940	2053	1969	1680	3532.88
unknown1186	0.0065055	0.0621809	24	3	2198.93	0.0280606	0.589446	28	6.63e-05	3906.99	0.00175401	0.0310861	26	1.62503	1977.78	810.42	0.409762	4958	3756	2882	4032	4070	1875	3362	2274	1532	1971	108	82	111	189	113	84	1962.44
unknown1232	0.0065055	0.0621809	18	3	1296.3	0.157864	0.60856	27.6489	4.98e-05	8782.5	0.00809378	0.0609108	22.8245	1.90206	9796.17	6131.22	0.625879	10135	6062	9603	9330	4208	9381	7870	9975	7907	8294	5169	5495	14263	20439	14550	16067	9921.75
unknown1235	0.0065055	0.0621809	24	6	1626.35	0.0910229	0.589446	26.9725	6	5111.25	0.00499286	0.049225	25.4862	6.02048	3492.95	1239.84	0.354955	6242	3036	3706	5033	6759	3430	5408	4848	3460	4608	3176	1465	1408	1515	1636	1152	3555.12
unknown1322	0.0065055	0.0621809	24	3	8193.42	0.101165	0.589446	28	6.63e-05	30838.2	0.00547963	0.0495045	26	1.62503	19445.3	2902.98	0.149289	36353	28909	25382	32709	21774	24201	14001	18876	23122	16690	12945	5127	7940	13726	17661	10830	19390.4
unknown1350	0.0065055	0.0621809	24	3	3505.66	0.0308536	0.589446	28	6.82e-05	10473.2	0.00190955	0.0323004	26	1.62503	6442.28	681.271	0.10575	11637	9727	9055	11474	7311	7865	5876	7915	6000	4758	6334	2123	2878	3871	3483	2563	6429.38
unknown1400	0.0065055	0.0621809	24	18	1355.17	0.128439	0.590647	26.9725	17.9999	4890.24	0.0067575	0.0556347	25.4862	18.0614	2983.99	1461.73	0.489856	4217	1925	1578	1848	3053	1353	1039	1131	1741	2658	4127	2540	4413	4908	6437	3803	2923.19
unknown1415	0.0065055	0.0621809	24	6	1232.13	0.409891	0.928252	20.464	6.00001	3416	0.0184711	0.0936801	22.232	6.03819	1789.83	1334.18	0.745424	2605	1080	907	2464	2747	2967	7097	853	652	1882	661	729	667	700	807	641	1716.19
unknown1558	0.0065055	0.0621809	24	18	1545.38	0.100634	0.589446	27.6489	17.9999	7317.98	0.00545433	0.0495045	25.8245	18.0903	4747.99	1810.96	0.381417	5192	3424	3355	3152	3592	4081	2049	2621	4606	3511	6073	3610	5880	9187	8696	5509	4658.62
unknown1569	0.0065055	0.0621809	24	21	6751.1	0.0799859	0.589446	24.8451	17.9999	25256.2	0.0044547	0.0458287	24.4225	19.5318	18104.3	7142.08	0.394497	26364	15702	17181	21866	9306	16599	12353	13717	17260	13027	12284	10964	20215	30153	27860	22797	17978
unknown1626	0.0065055	0.0621809	24	21	1067.73	0.0694832	0.589446	24.8451	17.9999	3941.99	0.0039334	0.0432999	24.4225	19.5318	2721.06	1194.63	0.439032	3406	2332	3149	3391	1187	2581	1717	2075	2827	1918	1481	1367	3365	4610	4447	3346	2699.94
unknown1713	0.0065055	0.0621809	24	18	62323.9	0.0974	0.589446	26.9725	17.9999	204285	0.00529975	0.0495045	25.4862	18.0614	98099.4	81201.8	0.82775	167715	33931	50267	49468	35329	53365	26831	24321	68118	35129	98337	55590	151631	264565	259615	141332	94721.5
unknown1787	0.0065055	0.0621809	18	9	306.177	0.629797	1	20	6.00001	2827.5	0.026621	0.114307	19	7.60001	1373.75	1238.05	0.901222	448	282	345	344	3767	540	6457	546	309	600	607	1979	508	478	522	354	1130.38
unknown1881	0.0065055	0.0621809	24	3	30673.9	0.0639561	0.589446	28	6.34e-05	102137	0.003655	0.042274	26	1.62503	64521.9	1390.38	0.0215489	132026	82621	87328	106574	69910	84155	65984	71937	65134	67524	56516	22530	23503	40461	33890	22679	64548.2
unknown1907	0.0065055	0.0621809	24	3	1829.64	0.259825	0.733979	28	6.63e-05	8885.24	0.0124792	0.0750632	26	1.62503	6165.79	428.094	0.0694304	11615	7785	7165	8976	5842	6384	6071	6454	8560	5083	4454	2342	3937	5541	5183	3131	6157.69
unknown1994	0.0065055	0.0621809	24	18	3603.95	0.0696267	0.589446	28	17.9999	10203.7	0.00394059	0.0432999	26	18.1071	5180.93	3222.58	0.622007	5309	2977	1883	2379	4340	1891	1123	1790	2217	4182	8361	2887	8118	11108	12999	8590	5009.62
unknown202	0.0065055	0.0621809	24	6	41489.7	0.0911751	0.589446	28	5.99999	90327.2	0.00500021	0.049225	26	6.03571	59447.9	21672.9	0.36457	111914	51134	93766	90682	122956	68659	99384	70310	42654	101936	48818	16406	14815	16679	12544	12105	60922.6
unknown2140	0.0065055	0.0621809	24	18	1891.86	0.0768141	0.589446	28	17.9999	6886.73	0.00429827	0.0449306	26	18.1071	4137.41	1241.01	0.299949	3566	3222	1563	2216	5092	2673	1226	2455	3326	3337	4993	3927	6836	6704	8061	5946	4071.44
unknown340	0.0065055	0.0621809	24	6	87464.9	0.0615723	0.589446	28	6.63e-05	199094	0.00353398	0.0417939	26	3.25003	132418	42229.8	0.318912	252692	125169	220584	197933	243854	135837	185224	170349	99828	186389	110508	46047	39591	39414	43671	32593	133105
unknown436	0.0065055	0.0621809	18	0	594.677	0.30738	0.80069	25.2722	6.63e-05	3837.74	0.0144271	0.0823436	21.6361	2.84e-05	3190.95	478.899	0.150081	4116	3414	3345	4476	3018	3254	2294	2990	3053	3073	3300	2055	3169	3558	3235	3433	3236.44
unknown445	0.0065055	0.0621809	24	18	1791.28	0.0355118	0.589446	28	17.9999	7248.23	0.00216537	0.0345948	26	18.1071	4179.97	1793.59	0.429091	3888	2920	2004	2716	3456	3182	2032	1708	2798	4116	4528	3013	7674	6805	8036	6478	4084.62
unknown489	0.0065055	0.0621809	24	18	2862.72	0.127773	0.589446	23.52	17.9999	5442.25	0.0067268	0.0556347	23.76	18.0018	3293.6	957.126	0.290602	2557	1399	897	1054	1107	1014	732	1177	1443	4001	9776	5895	4830	5705	7460	3774	3301.31
unknown75	0.0065055	0.0621809	24	6	1915.02	0.0688652	0.589446	28	6	6177.75	0.00390242	0.0432999	26	6.03571	4793.73	1012.41	0.211195	5002	4019	8345	7295	6786	5295	6523	6107	4033	5325	4491	4490	2301	2801	2199	2790	4862.62
unknown787	0.0065055	0.0621809	24	3	2947.22	0.142271	0.597007	28	6.63e-05	12598.7	0.0073906	0.0580618	26	1.62503	8626.63	904.678	0.10487	15936	11739	9774	12946	7839	9330	8587	9776	10793	6678	6905	3359	5348	7385	7096	4261	8609.5
unknown837	0.0065055	0.0621809	24	6	3124	0.116891	0.589446	26.1721	6.00001	7383	0.00622157	0.0530718	25.0861	6.01127	4737.95	1975.22	0.416892	8415	4022	6318	6227	11077	4038	8000	6417	3502	6827	4165	1667	1529	1820	1798	1135	4809.81
unknown84	0.0065055	0.0621809	24	6	8074.81	0.148231	0.602253	26.8085	6	15841	0.00766063	0.0589003	25.4043	6.01839	9955.03	3670.15	0.368673	20336	6551	17253	13958	25011	8323	14589	15441	4901	14957	7439	2622	2284	2686	3208	2500	10128.7
unknown847	0.0065055	0.0621809	18	0	822.365	0.257772	0.73114	24.1644	6.63e-05	5498.24	0.0123939	0.0748729	21.0822	2.89e-05	4232.5	1183.69	0.279667	6869	4597	4457	6070	3677	4407	3414	3314	3756	4303	4149	1167	4259	5619	5454	4501	4375.81
unknown87	0.0065055	0.0621809	18	3	885.121	0.230239	0.700313	24.2975	6.63e-05	7860.74	0.0112393	0.0709701	21.1488	1.76243	7162.72	1828.92	0.255339	8360	6261	8001	8821	7356	7515	5654	6061	6993	6264	5925	4478	7173	9498	9167	9193	7295
unknown886	0.0065055	0.0621809	24	3	3112.15	0.0521493	0.589446	28	7.78e-05	7390.98	0.0030495	0.0400851	26	1.62504	3848.85	97.4774	0.0253264	10328	5696	6572	6968	4815	3990	4765	5337	4580	4178	1433	372	470	835	731	482	3847
unknown904	0.0065055	0.0621809	24	3	6503.61	0.0442425	0.589446	28	7.84e-05	19807.2	0.00263446	0.0384016	26	1.62504	11946.9	2647.56	0.22161	26260	13811	17634	21524	13134	14067	12999	15922	10955	11075	7299	2979	5096	6256	6786	4552	11896.8
unknown92	0.0065055	0.0621809	24	3	1554.4	0.0744798	0.589446	28	6.63e-05	6165.49	0.00418261	0.0442184	26	1.62503	4160.18	573.736	0.137912	7424	5414	5169	6655	5165	4923	3241	4314	4398	3915	2903	1747	2328	3057	3260	2476	4149.31
unknown952	0.0065055	0.0621809	24	21	2562.02	0.270687	0.75398	24.4321	6.63e-05	14162	0.0129287	0.0766117	24.2161	22.7026	12414.1	4170.44	0.335944	20708	11295	11979	12666	9679	10249	9082	9731	11302	9500	11558	6030	12648	20394	18491	12704	12376
unknown981	0.0065055	0.0621809	24	18	8532.3	0.0737685	0.589446	28	17.9999	31397.4	0.00414727	0.0442184	26	18.1071	15665	9960.59	0.635848	14500	10665	6464	6854	7332	8990	5731	6536	10824	5968	20003	12712	25357	42567	37118	20548	15135.6
unknown998	0.0065055	0.0621809	24	21	1187.94	0.107559	0.589446	24.7059	6.63e-05	4031.49	0.0057831	0.0514879	24.3529	22.8309	3627.2	1266.31	0.349116	4353	3689	3680	4404	2716	4146	2034	2327	3600	2166	2722	2614	3607	4996	5318	5363	3608.44
unknown206	0.00815751	0.0691373	18	3	501.162	0.154359	0.604555	24.8451	6.63e-05	3690.99	0.00966716	0.0655365	21.4225	1.78524	3211.42	1415.5	0.440772	4511	3101	3002	4150	2551	3537	1997	2231	2865	1999	2364	2146	2865	4953	5452	5065	3299.31
unknown692	0.00815751	0.0691373	24	18	1237.44	0.107416	0.589446	27.6489	17.9999	4952.99	0.0070449	0.0566637	25.8245	18.0903	3080.18	1322.19	0.429257	3366	2275	1759	2238	3392	1446	1149	1619	1629	2818	4461	2275	4201	4691	6034	4886	3014.94
3'-O-Methylguanosine	0.00980952	0.0691373	24	3	1200.49	0.239598	0.71182	28	6.79e-05	4581.24	0.0165774	0.0891475	26	1.62503	2852.48	421.612	0.147805	7823	4307	2852	3343	2761	3034	3222	3624	2621	2156	2606	974	1420	2235	1509	1025	2844.5
Asn-His	0.00980952	0.0691373	24	21	1077.81	0.124784	0.589446	25.5652	17.9999	4515.74	0.0094322	0.0651616	24.7826	19.5668	3168.09	1120.84	0.353792	4359	3548	2201	2630	2411	2005	1833	2417	2487	2678	3571	1910	4036	4768	5740	3519	3132.06
Guanine	0.00980952	0.0691373	24	3	588.313	0.0452374	0.589446	28	6.63e-05	1913.25	0.00386967	0.0432999	26	1.62503	1185.75	3.42085	0.00288498	2063	2059	1671	1860	875	1450	1317	1382	1208	955	1136	526	564	653	719	535	1185.81
Methylacetate	0.00980952	0.0691373	24	21	7125.69	0.11771	0.589446	24.8451	6.63e-05	22878.2	0.00896485	0.063184	24.4225	22.8962	20671.5	7728.56	0.373875	26639	19730	19209	25935	16611	21095	12604	13321	18784	13439	15116	13864	18531	30837	32261	30583	20534.9
N-Acetyl-DL-leucine	0.00980952	0.0691373	24	3	14046.3	0.0714647	0.589446	28	7.84e-05	33591.9	0.00579262	0.0514879	26	1.62504	15245.8	4679.92	0.306965	51671	27142	35061	20494	30325	12878	13892	17761	8023	17747	1492	870	1009	2176	1003	971	15157.2
N-Acetylglucosamine	0.00980952	0.0691373	24	3	601.041	0.0761072	0.589446	28	6.63e-05	1778.5	0.00612193	0.0528871	26	1.62503	984.564	125.525	0.127493	2229	1774	1155	1956	1023	1236	751	1166	1135	844	520	191	234	522	672	307	982.188
N-Acetylphenylalanine	0.00980952	0.0691373	24	3	43294.7	0.0299418	0.589446	28	7.58e-05	83126.5	0.00268247	0.0386267	26	1.62504	38119.1	14827.1	0.388968	102556	80523	85639	63789	81294	38233	42198	36790	19878	40155	3125	1439	1904	3580	1838	2473	37838.4
N2-Isobutyryl-2'-deoxyguanosine	0.00980952	0.0691373	24	3	610.587	0.0304752	0.589446	28	6.63e-05	1631.25	0.00272498	0.0386267	26	1.62503	889.657	38.0102	0.0427246	1870	1691	1369	1595	789	1200	906	1167	826	810	671	221	174	369	315	250	888.938
Oxypurinol	0.00980952	0.0691373	24	0	57955.7	0.126445	0.589446	24.1644	7.11e-05	303354	0.00954134	0.065294	24.0822	3.54e-05	229656	80716.1	0.351466	376163	286816	244233	306205	265264	236479	149311	217963	229600	162127	124571	112687	217183	282404	262258	197783	229440
Phosphocholine	0.00980952	0.0691373	24	18	828.022	0.222394	0.694721	28	17.9999	3195.48	0.0155497	0.0849298	26	18.1071	1085.97	1375.15	1.26628	1456	96	182	187	90	196	54	74	277	61	551	200	1419	5496	4479	1388	1012.88
Succinic acid	0.00980952	0.0691373	24	21	43832.3	0.107976	0.589446	24.7059	6.63e-05	146588	0.00831495	0.0609108	24.3529	22.8309	130767	47919.6	0.366451	173745	128064	121924	162621	103691	136901	80224	81573	124659	85501	99210	81786	123693	193126	196773	187415	130057
Thr-Tyr	0.00980952	0.0691373	24	21	3996.92	0.0763182	0.589446	26.6465	17.9999	16694.2	0.00613683	0.0528871	25.3233	19.632	10675.9	4299.59	0.402738	13362	10904	6166	7955	7714	7921	4502	6743	9946	7705	10943	6543	13656	18278	20721	14122	10448.8
Tyr-Asp	0.00980952	0.0691373	24	21	1905.3	0.325916	0.820116	25.1282	17.9999	9000.48	0.021566	0.101434	24.5641	19.5447	5813.66	2807.16	0.482855	11221	5604	2907	4739	3787	4086	1786	3546	5456	4793	5828	2211	6206	11894	11718	6184	5747.88
alpha-Galactosamine-1-phosphate	0.00980952	0.0691373	24	3	2749.58	0.12771	0.589446	28	6.63e-05	9939.98	0.00962429	0.0655365	26	1.62503	5945.75	515.035	0.0866224	12798	9590	6772	10600	4725	6397	5912	6491	7697	4675	3831	1622	2623	4374	4430	2439	5936
unknown1036	0.00980952	0.0691373	24	3	2191.68	0.0654469	0.589446	28	6.63e-05	7078.74	0.00536131	0.0495045	26	1.62503	4239.5	868.339	0.204821	8924	7113	5213	7065	3960	5776	3363	5144	4080	3282	3400	889	1765	3355	2760	1480	4223.06
unknown1072	0.00980952	0.0691373	24	3	1953.03	0.0621584	0.589446	28	7.86e-05	7099.74	0.00512336	0.049225	26	1.62504	4891.86	78.495	0.016046	8069	7105	6267	6958	4297	6214	4907	6033	5851	4362	3931	2397	2601	3178	3598	2478	4890.38
unknown118	0.00980952	0.0691373	24	3	44468.5	0.0478948	0.589446	28	5.46e-05	184657	0.00407016	0.0442184	26	1.62503	131838	2304.65	0.0174809	211628	174345	158749	193907	131795	170399	128706	143232	137851	121917	121200	73041	83731	88499	90184	79527	131794
unknown1199	0.00980952	0.0691373	24	18	2343	0.0881475	0.589446	26.8085	17.9999	7419.48	0.00696343	0.0563332	25.4043	18.0551	4055.39	2655.78	0.654878	6535	3324	1166	1759	2737	1653	1011	1587	2515	2590	5643	3004	6016	7973	9265	6424	3950.12
unknown122	0.00980952	0.0691373	24	6	2008.54	0.0953381	0.589446	28	5.99997	4042.75	0.00745813	0.0583071	26	6.0357	2732.94	792.581	0.29001	5464	2087	4400	4068	5431	2638	3881	4221	1710	3936	2530	767	691	1052	1029	685	2786.88
unknown1282	0.00980952	0.0691373	24	3	2723.78	0.0740119	0.589446	28	6.63e-05	7828.23	0.00597365	0.0522648	26	1.62503	4060.81	1069.31	0.263325	8727	10363	4312	7911	3280	3970	4254	5962	4712	2419	1634	629	1047	1629	2440	1360	4040.56
unknown1311	0.00980952	0.0691373	24	3	675.464	0.0879691	0.589446	28	6.63e-05	3533.24	0.00695109	0.0563332	26	1.62503	1887.46	463.367	0.245497	4404	4342	2068	3319	1470	1399	1377	2351	1316	1608	1266	473	1152	1285	1218	1011	1878.69
unknown136	0.00980952	0.0691373	24	3	9355.73	0.150995	0.602253	28	6.3e-05	34184.2	0.011131	0.0709284	26	1.62503	23177.4	2459.53	0.106118	42333	31231	27101	36072	21832	33699	20491	24562	31137	16096	17801	8672	12597	18834	16864	10771	23130.8
unknown138	0.00980952	0.0691373	24	6	32048.9	0.040075	0.589446	28	6	87389.2	0.0034757	0.0417939	26	6.03572	59501.3	30306.9	0.509348	63519	67070	96692	106616	70342	87303	88716	103196	60709	71982	63133	92340	5072	2740	2381	3206	61563.6
unknown1424	0.00980952	0.0691373	24	6	14879.3	0.075691	0.589446	28	7.92e-05	45966.9	0.00609252	0.0528871	26	3.25004	31554.7	308.186	0.00976671	46438	36155	41468	59807	26143	36681	40518	44460	25798	39551	24507	20353	14042	19077	14313	15645	31559.8
unknown1459	0.00980952	0.0691373	24	6	1657.28	0.189311	0.643565	26.3284	6.00001	3977.25	0.0135356	0.0788682	25.1642	6.01287	2515.8	1054.92	0.419318	4598	1762	4433	2818	6367	2041	4264	3237	1553	3546	2615	618	589	1123	884	464	2557
unknown1487	0.00980952	0.0691373	24	3	1208.09	0.1014	0.589446	28	6.71e-05	4300.49	0.00787102	0.0601863	26	1.62503	2932.83	483.012	0.164691	5196	4019	3588	4399	2772	4277	2730	3137	3271	2306	2630	805	1613	2315	2402	1319	2923.69
unknown1516	0.00980952	0.0691373	24	6	9126.27	0.0900247	0.589446	28	6.48e-05	18965.5	0.00709312	0.0568876	26	3.25003	12842.5	5217.58	0.406274	24526	10243	24311	16782	22574	13647	21395	16375	8362	19811	11518	3846	3688	3209	3498	3053	12927.4
unknown156	0.00980952	0.0691373	18	12	1052.88	0.247933	0.717821	26.8085	12	8110.75	0.0170709	0.0902366	22.4043	12.4824	5772.21	3868.41	0.670178	4583	7921	5588	5532	9104	6744	3760	7115	6524	6722	8682	10515	2620	951	1512	1904	5611.06
unknown1562	0.00980952	0.0691373	24	3	1050.23	0.0566233	0.589446	28	5.65e-05	4650.25	0.00471893	0.0472063	26	1.62503	3532.2	126.275	0.0357495	4821	4918	4038	4824	3387	4516	3190	3948	3762	3152	3177	2340	2466	2796	2706	2436	3529.81
unknown158	0.00980952	0.0691373	24	6	2426.08	0.0391376	0.589446	28	6.63e-05	4797.25	0.00340349	0.0416025	26	3.25003	2952.34	1193.7	0.404324	5320	2534	5418	5917	4956	3096	4468	4619	2313	3510	1906	774	596	664	866	591	2971.75
unknown1587	0.00980952	0.0691373	24	3	2916.11	0.0928768	0.589446	28	6.63e-05	6688.73	0.00728942	0.057741	26	1.62503	2742.98	903.52	0.329393	9677	6713	6884	3481	6481	1798	1181	2727	963	3044	202	14	48	229	84	88	2725.88
unknown1706	0.00980952	0.0691373	24	6	1406.08	0.0915077	0.589446	25.8651	6.00001	5634.25	0.0071953	0.0573774	24.9326	6.00841	4462.65	802.022	0.179719	5105	3660	5607	6361	5244	5096	5730	6467	2643	5139	4436	3874	3149	2886	2947	3458	4487.62
unknown171	0.00980952	0.0691373	24	21	1072.33	0.198016	0.658454	24.5682	17.9999	4422.99	0.0140707	0.081139	24.2841	19.5202	3340.16	1135.17	0.339854	4766	2474	3242	4558	2396	2503	2206	3032	2648	2213	3195	2300	3472	5417	5362	3441	3326.56
unknown1728	0.00980952	0.0691373	24	3	1532.48	0.0271193	0.589446	28	6.63e-05	3741.25	0.00245594	0.0368523	26	1.62503	2495.41	328.88	0.131794	3525	3901	3130	4409	3212	3043	3352	3478	2939	2394	1476	778	865	1311	1125	889	2489.19
unknown175	0.00980952	0.0691373	18	3	1731.7	0.122164	0.589446	24.9858	6.63e-05	11331.2	0.00925958	0.0644844	21.4929	1.79111	9743.19	4928.28	0.505817	13154	8735	9778	13658	7195	10718	5004	5995	9566	5398	6707	5710	9279	16209	16811	16671	10036.8
unknown177	0.00980952	0.0691373	24	3	9505.11	0.0739551	0.589446	28	6.63e-05	31520.9	0.00596962	0.0522648	26	1.62503	18511.2	3031.53	0.163767	40458	29997	23264	32365	16487	25579	14797	20485	19449	14235	13907	4146	7326	13773	11787	7206	18453.8
unknown1798	0.00980952	0.0691373	24	6	3952.02	0.0457484	0.589446	28	6.63e-05	14869	0.00390833	0.0432999	26	3.25003	11401.3	1260.4	0.110549	15306	13540	16186	14444	9948	14787	13934	14534	12044	9328	11355	7243	5935	8377	9171	6617	11421.8
unknown1811	0.00980952	0.0691373	18	0	1502.07	0.699588	1	26.1721	17.9999	4633	0.0410499	0.146655	22.0861	18.6379	4497.05	1595.82	0.354859	9825	6974	5013	4906	3245	3549	1254	4388	1743	6051	4865	3706	5046	4085	4905	4496	4628.19
unknown182	0.00980952	0.0691373	18	3	1494.47	0.0863215	0.589446	23.9024	6.63e-05	9525.73	0.00683691	0.056123	20.9512	1.74596	6966.9	3626.2	0.52049	13511	8115	6295	10182	5385	5366	3487	6184	6528	3822	4126	3696	8879	11776	11196	7570	7257.38
unknown1833	0.00980952	0.0691373	24	3	1770.95	0.0594966	0.589446	28	6.63e-05	5352.49	0.0049295	0.0491366	26	1.62503	3087.58	208.682	0.0675876	6528	5666	3627	5589	2940	4714	2851	3441	3060	2698	2683	578	1102	1434	1444	983	3083.62
unknown1879	0.00980952	0.0691373	24	9	1682.91	0.147181	0.601421	25.1282	6	6731.5	0.0108868	0.0697888	24.5641	7.53842	5150.89	1845.96	0.358376	2630	4670	6405	5718	5272	5864	7601	8189	4869	7240	4806	7519	3252	2961	2641	3491	5195.5
unknown194	0.00980952	0.0691373	24	3	6057.78	0.114092	0.589446	28	7.58e-05	26654	0.00872425	0.0622746	26	1.62504	20020.5	1984.66	0.0991311	30317	25228	22560	28511	18022	24542	22506	21987	24381	17554	15975	9597	12243	17967	15572	12765	19982.9
unknown2054	0.00980952	0.0691373	24	21	1046.69	0.122244	0.589446	24.2975	17.9999	3880.99	0.00926486	0.0644844	24.1488	19.5099	2944.01	1081.43	0.367331	4925	3304	2600	2997	2862	2430	1723	1753	2308	1971	2883	1715	3795	4011	4480	3238	2937.19
unknown2125	0.00980952	0.0691373	24	3	2848.4	0.0559691	0.589446	28	6.63e-05	6221.48	0.00467079	0.047062	26	1.62503	2960.25	617.302	0.20853	7131	6298	6852	4605	5671	3192	1409	3185	2268	3479	509	218	350	872	704	434	2948.56
unknown217	0.00980952	0.0691373	24	3	1060.66	0.0516217	0.589446	28	7.36e-05	4569.49	0.00434894	0.0452906	26	1.62503	3270.94	320.53	0.0979931	5495	3983	3630	5170	3272	4205	3303	3686	3077	2894	2951	1831	2030	2077	2394	2240	3264.88
unknown2203	0.00980952	0.0691373	24	18	1735.42	0.215695	0.68516	28	17.9999	8641.98	0.015146	0.0835424	26	18.1071	5482.08	2163.75	0.394696	6116	4578	3493	2542	4318	3037	2353	4147	4679	3558	8012	4472	6769	10995	11591	5213	5367.06
unknown2212	0.00980952	0.0691373	24	6	87014.4	0.106945	0.589446	28	6	246325	0.00824561	0.0609108	26	6.03572	169732	69193.5	0.407663	105718	218303	333222	288788	119335	301007	307692	257266	195380	196888	142194	183448	41114	34442	29446	36803	174440
unknown289	0.00980952	0.0691373	24	3	7142.49	0.14069	0.596796	28	6.52e-05	23858.2	0.0104689	0.068109	26	1.62503	15987.6	1610.3	0.100722	29379	22012	19200	24842	13918	23881	14319	17674	21776	10579	11713	6568	8380	12616	11222	7235	15957.1
unknown300	0.00980952	0.0691373	24	6	5108.49	0.0506365	0.589446	28	6.23e-05	12462.2	0.00427551	0.0448607	26	3.25003	9100.72	2491.91	0.273815	12447	11098	12383	13921	11286	16056	9682	11809	12229	11045	6409	4594	3009	3704	3306	3282	9141.25
unknown365	0.00980952	0.0691373	24	6	1840.95	0.0781361	0.589446	28	6.63e-05	3901	0.00626497	0.0530718	26	3.25003	2573.68	926.818	0.360115	4580	2067	4597	4360	4820	2442	3579	3391	1583	3429	1911	817	677	1018	1124	1025	2588.75
unknown383	0.00980952	0.0691373	24	6	5711.12	0.0422273	0.589446	28	7.19e-05	12690.2	0.0036407	0.042274	26	3.25003	7121.66	82.6285	0.0116024	16236	9559	10658	14308	6448	11686	9744	9149	7767	7440	5905	2777	563	619	630	436	7120.31
unknown394	0.00980952	0.0691373	24	6	34609.7	0.0763564	0.589446	26.4865	6	101757	0.00613952	0.0528871	25.2432	6.01459	66395	41460.2	0.624448	36079	67613	90964	104953	68359	109459	112356	116854	60515	88224	59617	119513	17954	9990	8912	18666	68126.8
unknown399	0.00980952	0.0691373	24	9	118069	0.0649063	0.589446	26.9725	6.00002	302848	0.00532231	0.0495045	25.4862	7.61337	206161	119115	0.577775	125118	225460	332386	280071	232061	340492	302936	335904	282692	265186	216473	369566	43162	20166	21111	27129	213745
unknown483	0.00980952	0.0691373	24	18	4529.02	0.0357752	0.589446	28	17.9999	18573.7	0.00314261	0.0401522	26	18.1071	8022.89	6394.15	0.796988	7887	3006	3538	2714	4349	2422	2200	3118	2679	3842	8799	4079	17546	18194	21210	17345	7683
unknown506	0.00980952	0.0691373	24	3	1506.84	0.0416196	0.589446	28	6.63e-05	4628.24	0.00359423	0.042274	26	1.62503	2665.51	241.486	0.0905964	5603	4792	3564	4554	2177	3152	2607	3584	2515	2047	2271	859	1063	1329	1391	1067	2660.94
unknown533	0.00980952	0.0691373	24	21	1026.54	0.107678	0.589446	27.6489	6.63e-05	4279.25	0.00829488	0.0609108	25.8245	24.2105	4819.39	1612.71	0.334629	5167	3012	4720	4218	3529	4031	4002	3792	4013	3838	4368	2990	6347	8208	7245	5825	4706.56
unknown613	0.00980952	0.0691373	24	3	5858.38	0.109891	0.589446	28	6.05e-05	21966.2	0.00844347	0.0614584	26	1.62503	14740.9	2583.55	0.175264	29684	20173	16489	21519	13804	17458	14384	19112	16895	10792	11831	5048	8239	11544	11768	6331	14691.9
unknown623	0.00980952	0.0691373	24	6	31511.5	0.0425246	0.589446	28	6	74760.8	0.00366341	0.042274	26	6.03571	50718.9	23644.7	0.466191	57996	51466	88323	95940	60984	86072	67607	84380	66353	57559	39303	67118	4921	2189	2518	4516	52327.8
unknown636	0.00980952	0.0691373	24	21	1444.27	0.0920391	0.589446	27.3065	17.9999	6677.48	0.00723186	0.0575046	25.6533	19.6784	4153.28	1614.02	0.388612	4767	1701	3757	3327	3155	2760	2213	1986	3061	2689	5440	3212	5335	8297	7596	5482	4048.62
unknown643	0.00980952	0.0691373	24	6	5983.36	0.0747958	0.589446	28	6.63e-05	13050	0.00602919	0.0525859	26	3.25003	8518.2	2439.76	0.286417	16335	8316	13356	14193	14242	7228	13711	11155	5254	12629	5993	3173	3438	2415	3192	2296	8557.88
unknown681	0.00980952	0.0691373	24	9	5352.8	0.0402667	0.589446	27.4766	5.99999	16502.5	0.00349045	0.0417939	25.7383	7.63613	11571.1	6269.95	0.541862	9294	14598	16973	15014	15734	18553	14076	17647	15702	16771	14807	16446	2565	1346	1586	1491	12037.7
unknown751	0.00980952	0.0691373	24	21	2390.37	0.135827	0.595121	25.4179	17.9999	8362.23	0.0101539	0.0673147	24.7089	19.5591	5650.38	2371.33	0.419676	8269	4434	4655	6544	4088	2914	3766	5141	2979	4188	6206	2664	8088	10144	6327	8890	5581.06
unknown752	0.00980952	0.0691373	24	6	924.189	0.0561987	0.589446	28	4.55e-05	5685.25	0.0046877	0.0470625	26	3.25002	4696.55	168.312	0.0358374	6067	5687	5370	5617	4398	5776	4236	5115	4749	4177	4170	4123	3873	3787	4091	3865	4693.81
unknown79	0.00980952	0.0691373	24	18	1135.97	0.0603443	0.589446	28	17.9999	4216.98	0.00499137	0.049225	26	18.1071	1950.39	1332.37	0.683131	1305	513	886	1579	1118	616	820	852	623	1307	2605	981	4221	3337	3611	5699	1879.56
unknown823	0.00980952	0.0691373	24	18	2365.27	0.0679043	0.589446	27.1385	17.9999	8528.73	0.00553806	0.0498604	25.5692	18.068	4959.28	2730.22	0.550527	5986	4887	2309	2820	3749	3012	1475	2399	3810	3431	7049	2404	7928	9244	9621	7322	4840.38
unknown839	0.00980952	0.0691373	24	6	5603.29	0.0345619	0.589446	28	6	15212.2	0.00304773	0.0400851	26	6.03571	10470.6	4845.81	0.462803	16813	15804	10784	11908	17393	14677	13049	15730	12040	11563	15941	8046	1967	2239	2643	2208	10800.3
unknown887	0.00980952	0.0691373	24	3	1702.71	0.102272	0.589446	28	7.31e-05	6751.24	0.00793016	0.0604729	26	1.62503	4725.31	745.946	0.157862	8635	6255	5331	6784	4677	5523	5039	5568	5764	3590	3592	1858	2819	3863	3899	2182	4711.19
unknown892	0.00980952	0.0691373	24	0	1252.46	0.191887	0.649159	24.2975	6.63e-05	5272.49	0.0136943	0.0796269	24.1488	3.3e-05	3959.03	1597.92	0.403614	5925	3618	4906	6641	2203	3964	3998	3258	3660	3774	2064	1512	3833	5478	4356	4032	3951.38
unknown896	0.00980952	0.0691373	24	21	5116.45	0.106604	0.589446	24.0327	6.63e-05	27848.2	0.00822262	0.0609108	24.0163	22.5154	24525.7	5437.65	0.221712	29039	24387	25823	32144	21727	21039	18450	23657	23712	19209	24118	15310	28736	31791	28255	24953	24521.9
unknown903	0.00980952	0.0691373	24	6	2015.96	0.137234	0.596796	28	6	7805.75	0.0102452	0.0677591	26	6.03571	6434.75	1069.05	0.166136	5482	8619	8257	7900	5833	8373	7724	9293	8441	5818	5705	5212	4258	4300	4844	4061	6507.5
unknown934	0.00980952	0.0691373	24	21	675.994	0.21234	0.678856	24.1644	17.9999	3516.99	0.0149431	0.0832457	24.0822	19.5053	2927.87	731.397	0.249805	4177	2949	2603	3531	2401	2534	1923	2711	2560	2561	2781	2006	2701	4178	4013	3176	2925.31
unknown944	0.00980952	0.0691373	24	6	2682.76	0.0671067	0.589446	28	5.53e-05	5090.5	0.0054808	0.0495045	26	3.25003	3125.4	1854.31	0.593303	6299	2661	5875	5527	7466	3134	4408	4354	2393	3976	1254	485	603	801	668	585	3155.56
unknown954	0.00980952	0.0691373	24	18	1784.03	0.111684	0.589446	26.4865	17.9999	7336.23	0.0085635	0.061759	25.2432	18.0437	4831.38	2018.32	0.417753	6959	3635	2900	3301	4187	2943	1671	3220	3562	4706	5918	3803	5890	8302	8671	6482	4759.38
unknown969	0.00980952	0.0691373	24	18	1913.61	0.0945758	0.589446	27.4766	17.9999	8571.98	0.00740595	0.0580618	25.7383	18.0825	5819.95	1970.52	0.33858	6760	5052	3964	3651	4793	3759	3196	4446	4357	4471	7742	5145	7648	8726	10628	7286	5726.5
unknown976	0.00980952	0.0691373	24	6	555.786	0.0768477	0.589446	28	5.2e-05	3209.25	0.00617419	0.053022	26	3.25002	2573.64	83.5067	0.0324469	3867	2983	2858	3129	2439	3548	2437	2738	2361	2224	2354	2068	1995	2069	2055	2075	2575
unknown991	0.00980952	0.0691373	24	21	715.239	0.132226	0.592036	26.1721	17.9999	5121.99	0.00991956	0.0660108	25.0861	19.6016	4146.95	753.383	0.181672	4727	3219	4100	4296	4098	4260	2702	3126	3758	3750	3787	3511	4832	5284	5120	5252	4113.88
unknown1119	0.0121536	0.0812513	24	6	1530.89	0.274329	0.75814	27.8233	6	3676.75	0.0223502	0.104664	25.9117	6.03284	2525.3	795.049	0.314834	4931	1809	3532	3473	6187	1887	3003	3630	1525	3532	2822	968	809	1278	1088	757	2576.94
3-Methylcytidine	0.0144977	0.0812513	24	3	696.147	0.0286795	0.589446	28	7.59e-05	2181.75	0.00365283	0.042274	26	1.62504	1468.64	45.3492	0.0308783	2392	1969	2000	2366	1436	1834	1761	1837	1391	1243	1590	785	837	741	744	586	1469.5
3-Nitrotyrosine	0.0144977	0.0812513	24	3	263.044	0.140403	0.596796	28	6.63e-05	1466	0.0146496	0.082529	26	1.62503	1064.25	174.748	0.164199	1658	1219	1147	1840	932	1073	1112	1281	1037	803	945	623	759	1116	578	852	1060.94
7-Methylguanosine	0.0144977	0.0812513	24	6	1117.94	0.134369	0.595121	28	6.17e-05	3142	0.0141057	0.0811732	26	3.25003	2187.3	192.993	0.0882333	2883	3454	2488	3743	1362	4024	2797	2714	2345	1941	2866	1053	890	958	982	547	2190.44
Ala-Ala-Lys	0.0144977	0.0812513	24	18	2334.87	0.0947032	0.589446	28	17.9999	8213.73	0.010422	0.0681082	26	18.1071	4863.59	2138	0.439592	5182	3724	2831	2609	4206	3141	2203	2600	3618	2715	7097	3218	7589	10595	7310	7361	4749.94
Asn-Thr	0.0144977	0.0812513	24	18	1865.7	0.185048	0.638405	24.8451	17.9999	9622.74	0.0185673	0.093879	24.4225	18.0054	7080.13	2355.57	0.332701	9532	7786	4155	5589	6079	4645	3323	4920	6747	6374	9025	6118	9243	9212	12606	7430	7049
Gln-Gln	0.0144977	0.0812513	24	21	496.035	0.130504	0.592031	27.3065	17.9999	2991.24	0.0137552	0.0796487	25.6533	19.6784	2019.59	637.505	0.315661	2395	1955	1331	1430	1802	1531	998	1613	1834	1806	1737	1255	3126	2469	3833	2537	1978.25
Lys-Pro	0.0144977	0.0812513	24	3	8317.34	0.0676791	0.589446	28	8.03e-05	26680.7	0.00777766	0.0596359	26	1.62504	17479	1273.22	0.0728429	35746	21277	24835	24865	21974	22366	18676	18669	18975	18535	12279	5419	7441	11419	9966	6837	17454.9
Pro-Thr	0.0144977	0.0812513	24	3	227521	0.0420767	0.589446	28	6.63e-05	533879	0.00512538	0.049225	26	1.62503	258261	33338.7	0.129089	553440	550637	640242	391202	409732	267014	238535	257282	159389	332533	101361	22549	41806	42903	70252	43202	257630
unknown100	0.0144977	0.0812513	24	6	194557	0.0423065	0.589446	28	5.99997	560846	0.00515002	0.049225	26	6.0357	402893	179449	0.445401	423702	519145	646205	646085	451321	667480	537288	587296	566383	477553	395035	529938	60325	42061	41550	50300	415104
unknown1081	0.0144977	0.0812513	24	6	2308	0.0453495	0.589446	28	6.63e-05	5826.25	0.00547478	0.0495045	26	3.25003	4313.88	1240.66	0.287597	6065	5037	5764	6439	5680	7488	4868	5214	5678	5376	2873	2529	1610	1767	1261	1696	4334.06
unknown1195	0.0144977	0.0812513	24	3	2244.36	0.274472	0.75814	28	4.44e-05	8749.24	0.0259711	0.113258	26	1.62502	6447.17	1477.74	0.229207	9851	8960	7049	9137	6666	8196	6503	6551	9416	4952	2843	2701	4666	6569	5170	3477	6419.19
unknown1285	0.0144977	0.0812513	24	21	1178.92	0.0531158	0.589446	28	17.9999	6158.97	0.00629064	0.0530718	26	19.7321	2922.56	1998.12	0.68369	2236	1470	1979	2195	1682	1945	1116	1005	1634	2259	1575	567	4500	6936	6853	6347	2768.69
unknown1294	0.0144977	0.0812513	24	3	631.8	0.247104	0.716295	24.8451	4.37e-05	6029.99	0.0237578	0.107643	24.4225	1.52643	4651.15	1614.9	0.347205	8257	4861	5024	5978	4893	4886	3850	4375	3447	3980	4279	1928	4253	4581	5858	3795	4640.31
unknown1302	0.0144977	0.0812513	24	18	6918.33	0.351269	0.853064	25.2722	17.9999	34648.2	0.0319813	0.125718	24.6361	18.012	25947.5	7405.45	0.285402	37401	16869	20260	21137	15078	18100	17505	22532	24949	23975	38926	17530	30834	41650	39694	26415	25803.4
unknown1309	0.0144977	0.0812513	24	18	1468.66	0.426058	0.945019	25.7143	17.9999	5705.99	0.0375983	0.139729	24.8571	18.0214	3762.33	1414.01	0.375833	5752	2587	1575	1776	2804	1986	1447	2061	2744	3029	7623	3410	4032	7058	8082	3652	3726.12
unknown1324	0.0144977	0.0812513	24	18	2794.31	0.18551	0.639207	25.7143	17.9999	10392.2	0.0186068	0.0939056	24.8571	18.0214	6675.24	3218.77	0.482196	8847	7178	3575	4090	3922	5993	1762	2726	7325	2487	10004	6007	7913	10216	13913	9527	6592.81
unknown1435	0.0144977	0.0812513	24	18	2019.5	0.0759397	0.589446	28	17.9999	6573.73	0.00860018	0.0618637	26	18.1071	3919.27	1433.7	0.365808	3638	2260	2055	2220	2661	2499	2062	2549	2592	2672	6714	3272	5885	7617	7375	5418	3843.06
unknown1441	0.0144977	0.0812513	24	18	1327.24	0.0479999	0.589446	28	17.9999	5753.48	0.00575523	0.0514835	26	18.1071	3103.44	1753.13	0.564899	3426	2551	1392	1542	2514	1506	1091	1752	2072	1666	3240	2398	5204	6214	6706	4890	3010.25
unknown1468	0.0144977	0.0812513	24	3	6113.47	0.0629762	0.589446	28	6.63e-05	12785.5	0.00730297	0.057741	26	1.62503	5897.62	1165.07	0.197549	18462	12487	10440	9753	10583	6319	3217	7150	4578	6536	1136	257	583	1197	754	557	5875.56
unknown1493	0.0144977	0.0812513	24	3	9691.25	0.0651647	0.589446	28	6.63e-05	31060.4	0.00752447	0.0586615	26	1.62503	17944.9	1286.72	0.0717041	40253	28093	22970	32926	16172	27482	17317	18069	18429	14738	14881	4419	7256	9613	8188	5922	17920.5
unknown1495	0.0144977	0.0812513	24	18	1749.74	0.0794447	0.589446	28	17.9999	5586.24	0.00894515	0.063184	26	18.1071	3533.4	1264.37	0.357835	3397	2510	1651	2011	2656	2106	1404	2247	2914	2475	6404	3339	4538	6331	6266	5210	3466.19
unknown1510	0.0144977	0.0812513	24	0	600.687	0.276261	0.760387	23.9024	6.63e-05	3292.49	0.0261143	0.113705	23.9512	3.32e-05	2786.36	868.753	0.311788	4369	2666	2875	3260	2343	2354	2155	2639	2667	2298	2161	1693	2640	4271	3596	2617	2787.75
unknown1613	0.0144977	0.0812513	24	21	1435.6	0.17096	0.621042	24.8451	17.9999	6570.99	0.0173499	0.090851	24.4225	19.5318	4719.22	1567.28	0.332105	7845	4253	3544	3487	3978	3216	2787	2253	4430	3927	5810	3250	5954	6896	7558	5876	4691.5
unknown1629	0.0144977	0.0812513	24	3	1275.27	0.0871828	0.589446	28	6.63e-05	3595.74	0.00969896	0.0655365	26	1.62503	1865.5	204.623	0.109688	4875	3886	3483	2139	2887	1445	1570	1964	1342	2215	812	514	515	835	748	556	1861.62
unknown1655	0.0144977	0.0812513	24	3	1139.33	0.0997485	0.589446	28	6.63e-05	4808.99	0.0109022	0.0697888	26	1.62503	3381.09	252.106	0.0745637	5691	4866	3861	4818	3376	3767	3228	3872	4163	2551	2849	1646	2008	3131	2265	1929	3376.31
unknown1685	0.0144977	0.0812513	24	3	21164.1	0.120478	0.589446	28	6.63e-05	62006.6	0.012838	0.0765616	26	1.62503	29874.1	2172.01	0.0727054	95915	54003	37799	60310	36308	38806	18681	29679	37604	23302	12375	1714	4464	8642	12639	5087	29833
unknown1694	0.0144977	0.0812513	24	18	4532.91	0.0886042	0.589446	26.9725	17.9999	19311.7	0.0098363	0.0658822	25.4862	18.0614	11159.5	6344.59	0.568538	16382	10568	4643	5300	9844	4150	4438	5341	7739	8370	12244	8063	16263	24508	20230	16246	10895.6
unknown1722	0.0144977	0.0812513	18	12	1120.94	0.195612	0.656037	27.1385	12	14571.2	0.0194698	0.0963005	22.5692	12.5129	11799.7	4846.06	0.410692	8489	11466	14167	15082	10899	15589	12335	13795	13439	14044	16560	14242	6684	5716	5822	7577	11619.1
unknown1723	0.0144977	0.0812513	24	21	8757.87	0.147392	0.601421	27.3065	17.9999	106329	0.0152751	0.0840885	25.6533	19.6784	82455.6	15783.8	0.191421	77290	78955	69690	80139	65495	64618	72134	73465	77318	70803	81366	66324	77635	109250	131789	106643	81432.1
unknown1753	0.0144977	0.0812513	24	3	1303.55	0.111554	0.589446	28	6.63e-05	4742.99	0.0120115	0.0741686	26	1.62503	3170.08	222.099	0.0700611	5759	4722	4251	4240	2784	3912	3028	3639	4321	2475	2095	1354	1922	2341	2355	1456	3165.88
unknown1764	0.0144977	0.0812513	24	21	2536.57	0.336682	0.834529	24.1644	17.9999	14585.2	0.0308603	0.124423	24.0822	19.5053	11777.3	3068.92	0.260579	17565	12109	9754	12531	7445	8510	9355	11261	11598	9599	11492	8705	10751	18529	16971	12090	11766.6
unknown1785	0.0144977	0.0812513	24	18	1636.25	0.0855932	0.589446	26.9725	17.9999	6637.48	0.00954495	0.065294	25.4862	18.0614	4172.68	1883.92	0.45149	5438	3877	2001	2739	3621	2933	1472	2236	3569	3040	5270	2763	5544	7097	7713	6196	4094.31
unknown1858	0.0144977	0.0812513	24	3	34249.4	0.0705272	0.589446	28	6.63e-05	108511	0.00806282	0.0609108	26	1.62503	62732.3	4147.9	0.0661206	138165	98048	78737	119096	53122	75176	67156	72313	75259	49302	41626	18560	21636	38339	37045	18880	62653.8
unknown186	0.0144977	0.0812513	24	3	28264.1	0.115237	0.589446	28	7.48e-05	122792	0.0123538	0.0747929	26	1.62503	90989.6	8790.93	0.0966146	141967	113439	101257	134505	81538	111792	103677	100537	111319	78519	72644	42585	54438	79248	70516	55190	90823.2
unknown1865	0.0144977	0.0812513	24	3	1347.39	0.167162	0.616574	28	6.63e-05	5920.99	0.017019	0.0901328	26	1.62503	3451.24	461.567	0.13374	8980	4922	5571	4211	4092	2980	2574	3454	2524	3649	2816	890	1998	2636	2203	1580	3442.5
unknown1928	0.0144977	0.0812513	24	18	6417.35	0.203768	0.666734	28	18	30635.7	0.0201608	0.0980294	26	18.1071	21867.1	5620.73	0.25704	21453	20861	11485	16227	17721	17062	10522	18684	19458	13047	32805	23225	27012	37405	34090	24036	21568.3
unknown1931	0.0144977	0.0812513	24	21	1128.54	0.0957546	0.589446	24.2975	17.9999	5618.99	0.0105224	0.0682975	24.1488	19.5099	4524.85	1193.14	0.263686	6378	3376	5098	5074	3381	3909	2671	4048	4330	3639	3995	3902	5740	5975	5449	5312	4517.31
unknown1936	0.0144977	0.0812513	24	21	1726.75	0.245594	0.716295	26.1721	17.9999	8606.48	0.0236344	0.107272	25.0861	19.6016	6306.74	1716.86	0.272225	8257	5286	5522	4995	5271	4810	4076	4593	4751	4805	8404	4506	7432	10627	9891	6476	6231.38
unknown2003	0.0144977	0.0812513	24	6	18796	0.0771826	0.589446	28	6.00001	52174.2	0.00872277	0.0622746	26	6.03572	34151.9	17394.7	0.509333	26055	32769	69875	58981	33232	56761	58749	59955	38206	46873	23392	42580	6086	2633	3429	5793	35335.6
unknown2034	0.0144977	0.0812513	24	18	44516.6	0.106015	0.589446	26.3284	17.9999	135547	0.0114934	0.0719015	25.1642	18.0386	74207.9	51595.6	0.695284	144298	32438	36573	45610	34547	47221	26361	20858	50655	30809	94503	53458	131528	142656	153122	114883	72470
unknown207	0.0144977	0.0812513	24	0	809.284	0.173435	0.622042	24.1644	6.63e-05	4324.99	0.0175649	0.0916321	24.0822	3.3e-05	3311.24	1145.43	0.345921	5520	4160	3322	4298	3658	3324	2056	3294	3472	2316	1828	1656	3402	3962	3855	2808	3308.19
unknown2105	0.0144977	0.0812513	24	21	918.178	0.376136	0.877756	24.7059	17.9999	4446.49	0.0338724	0.129973	24.3529	19.5258	3529.23	922.046	0.26126	3555	3074	4054	4607	2666	4597	1968	2212	3895	2444	2517	2874	3406	4790	4845	4745	3515.56
unknown2118	0.0144977	0.0812513	24	6	3166.78	0.180298	0.630663	28	6.63e-05	8348.5	0.0181586	0.092869	26	3.25003	5866.59	2061.73	0.351435	13180	4877	6877	8460	10601	7877	4728	8387	4309	4681	7394	2018	2867	2417	3241	2488	5900.12
unknown2138	0.0144977	0.0812513	24	21	1473.96	0.165273	0.616258	25.8651	17.9999	4979.23	0.0168538	0.0896981	24.9326	19.5835	2932.88	1687.44	0.575354	3885	1458	2476	3996	2763	1889	868	807	1636	2164	2846	1195	3678	3725	5098	7416	2868.75
unknown218	0.0144977	0.0812513	24	9	8156.12	0.119624	0.589446	24.8451	6	22104.8	0.0127594	0.0762557	24.4225	7.5282	14725.7	8959.46	0.608423	2771	12931	19340	14643	11591	23946	30304	22578	21350	17174	13890	26017	5897	5275	4595	5903	14887.8
unknown237	0.0144977	0.0812513	24	3	4960.53	0.0575922	0.589446	28	5.78e-05	13784.5	0.00675323	0.0556347	26	1.62503	8441.95	937.989	0.11111	14783	14881	10219	15255	7759	10485	9400	11275	10475	7548	4886	2044	2534	4821	5573	2849	8424.19
unknown255	0.0144977	0.0812513	24	3	8546.8	0.480715	1	28	4.94e-05	35534.2	0.0415804	0.147018	26	1.62502	22929.1	6824.44	0.297632	28974	23350	27514	62299	13292	17481	27043	38084	11318	11969	25981	13222	14962	19911	14448	14950	22799.9
unknown310	0.0144977	0.0812513	24	18	1266.78	0.166328	0.616258	25.7143	17.9999	6674.74	0.0169461	0.0899175	24.8571	18.0214	4876.5	1506.01	0.308829	3740	4943	4043	4969	4370	3367	2130	3611	4749	4921	6861	3004	5358	6571	8711	6059	4837.94
unknown350	0.0144977	0.0812513	24	6	1837.59	0.429721	0.949604	28	6.63e-05	4643.25	0.0378682	0.140359	26	3.25003	3143.93	718.904	0.228664	9137	2293	3366	3777	5056	3225	5871	3018	2548	5971	2290	1084	620	963	799	472	3155.62
unknown410	0.0144977	0.0812513	24	6	21113.5	0.149592	0.602253	28	5.09e-05	68371	0.015471	0.0848319	26	3.25002	48434.8	1969.67	0.0406665	59291	44779	73756	95658	35609	80366	55926	64540	53908	55449	47915	32472	14009	19558	17641	24592	48466.8
unknown412	0.0144977	0.0812513	24	6	7842.87	0.244078	0.716295	25.2722	6	19369.8	0.0235104	0.107272	24.6361	6.004	11903.8	5709.43	0.479632	20682	7759	18302	14575	34083	10049	18981	14366	7200	18259	10778	2890	3028	4982	3865	2590	12024.3
unknown415	0.0144977	0.0812513	24	0	732.032	0.348596	0.85259	26.1721	6.63e-05	3902.24	0.0317766	0.125621	25.0861	3.18e-05	2397.61	1283.38	0.535276	3031	2701	3357	6520	2517	2311	972	2481	3155	752	549	785	1675	2611	1678	2623	2357.38
unknown420	0.0144977	0.0812513	24	0	375.827	0.364136	0.86354	25.4179	6.63e-05	4706.24	0.0329629	0.128142	24.7089	3.22e-05	3974.3	725.974	0.182667	4927	4261	4185	5452	3818	4107	2531	3800	3743	3805	3906	2510	3684	4442	3919	4250	3958.75
unknown437	0.0144977	0.0812513	24	3	5766.81	0.0656783	0.589446	28	7.94e-05	12804	0.0075763	0.0587864	26	1.62504	6481.05	1669.28	0.257564	17412	12271	12572	8961	13938	6389	5566	7283	4150	8574	1014	592	794	1724	1034	917	6449.44
unknown457	0.0144977	0.0812513	24	6	42569.2	0.108043	0.589446	28	6	87780	0.0116836	0.0726259	26	6.03571	59049.6	22888.3	0.387611	72792	71519	103087	99442	68613	116639	82708	83160	119435	62356	33711	15899	10619	10339	10103	9292	60607.1
unknown467	0.0144977	0.0812513	24	18	2103.29	0.123263	0.589446	28	17.9999	18760	0.013094	0.0770997	26	18.1071	15660.8	1343.03	0.0857574	11482	13003	16595	14635	13640	15184	13591	14583	15392	14359	14756	17171	19667	17172	18000	20201	15589.4
unknown487	0.0144977	0.0812513	24	6	6365.73	0.178622	0.630663	26.4865	5.99998	15452.5	0.018014	0.092869	25.2432	6.01458	9797.27	4193.72	0.42805	17700	7813	14112	13216	25848	8860	15077	12025	6622	15844	7876	3038	3007	3347	3059	2115	9972.44
unknown513	0.0144977	0.0812513	24	9	4059.85	0.0747811	0.589446	27.3065	12	11622.8	0.00848564	0.0615154	25.6533	10.4467	7997.04	5177.23	0.647393	6072	8519	12484	10931	10060	11442	11158	12993	8761	11386	10434	15910	1389	639	557	1043	8361.12
unknown531	0.0144977	0.0812513	24	3	927.017	0.19792	0.658454	28	4.91e-05	4409.25	0.0196658	0.0966326	26	1.62502	3031.43	497.838	0.164226	6346	3730	2629	4932	3380	3361	3477	2894	2244	3377	2444	1313	1749	2513	2258	1705	3022
unknown549	0.0144977	0.0812513	24	21	1523.82	0.102941	0.589446	26.0177	17.9999	9556.73	0.0112041	0.0709701	25.0088	19.5924	7553.12	1584.21	0.209743	9161	5672	7241	7761	6702	7607	4750	5801	7016	6234	7284	6356	9054	10082	9830	9261	7488.25
unknown570	0.0144977	0.0812513	24	3	4405.45	0.0589928	0.589446	28	7.78e-05	9275.98	0.00689692	0.0563332	26	1.62504	4616.97	1315.33	0.284891	12409	8635	9205	6855	10003	4905	3666	5026	2810	5985	707	271	541	1096	755	604	4592.06
unknown579	0.0144977	0.0812513	24	3	1856.51	0.0552245	0.589446	28	5.48e-05	5944.99	0.00650921	0.0544207	26	1.62503	3966.51	459.547	0.115857	5985	4824	5051	7920	4267	4844	4715	5100	3906	4273	2924	1205	1857	2229	2400	1825	3957.81
unknown597	0.0144977	0.0812513	24	3	9004.3	0.087029	0.589446	28	6.63e-05	33171.9	0.00968407	0.0655365	26	1.62503	21304.2	2158.83	0.101334	37928	32983	26394	35383	23325	25226	17196	23893	24675	18990	16981	5306	8171	14106	17993	11663	21263.3
unknown803	0.0144977	0.0812513	24	3	3409.85	0.0703517	0.589446	28	7.27e-05	7921.73	0.00804529	0.0609108	26	1.62503	3621.68	1069	0.295168	12072	6613	7938	5064	7193	2898	3284	4258	1843	4350	449	206	285	535	326	309	3601.44
unknown821	0.0144977	0.0812513	24	6	2165.16	0.0591338	0.589446	28	6.63e-05	5354.5	0.00691135	0.0563332	26	3.25003	3522.59	628.641	0.17846	5735	3428	6235	6020	5451	3384	5060	4350	2500	4884	2769	1472	1340	1292	1321	1284	3532.81
unknown83	0.0144977	0.0812513	24	9	8928.28	0.0710648	0.589446	26.9725	6	22715.2	0.00811645	0.0609108	25.4862	7.61336	15379.4	9462.16	0.615249	10892	16615	23681	20171	17419	22215	23631	27596	16614	20759	18885	31429	2005	1368	1134	1295	15981.8
unknown898	0.0144977	0.0812513	24	3	2513.06	0.234648	0.704955	28	6.63e-05	10719	0.0227361	0.105937	26	1.62503	6403.39	391.917	0.0612047	17075	8761	7835	9205	7038	6422	5086	6814	6544	6364	5530	2578	2626	4376	3725	2594	6410.81
unknown938	0.0144977	0.0812513	24	21	299.813	0.385644	0.889121	23.7736	17.9999	1624.25	0.034589	0.131348	23.8868	19.4933	1337.85	390.209	0.291669	2501	1236	1183	1363	1334	1023	830	852	1309	1019	1330	959	1629	1666	1658	1544	1339.75
unknown980	0.0144977	0.0812513	24	3	901.915	0.337872	0.836736	27.6489	7.23e-05	5699.74	0.0309521	0.124423	25.8245	1.61406	4471.33	939.624	0.210144	6109	4803	4951	6936	3359	4661	5712	4821	4608	4296	3567	2005	2740	4501	4655	3539	4453.94
unknown986	0.0144977	0.0812513	24	6	7664.68	0.0310305	0.589446	28	6.63e-05	19058.5	0.00391683	0.0432999	26	3.25003	12899.5	2620.38	0.203138	16861	15431	21853	22089	15854	20714	16773	19377	16299	17464	12252	9434	996	531	527	619	12942.1
3.alpha.-Galactobiose	0.0210199	0.0979407	24	6	16719.5	0.049732	0.589446	28	4.1e-05	41792	0.00822008	0.0609108	26	3.25002	28517.7	576.533	0.0202166	31369	38785	49763	47251	30497	41883	41482	38280	36595	36344	38157	24862	507	211	233	215	28527.1
4-Hydroxyhippuric acid	0.0210199	0.0979407	18	3	200.465	0.308069	0.80069	24.4321	6.63e-05	1202.25	0.0391107	0.142877	21.2161	1.76803	999.225	503.932	0.504322	1542	792	798	1677	795	544	752	1184	565	605	988	510	1297	1961	1147	1393	1034.38
4-Thiouridine	0.0210199	0.0979407	24	18	733.623	0.0415535	0.589446	28	17.9999	2764.74	0.0070252	0.0566637	26	18.1071	1657.31	746.553	0.450461	1119	1495	1208	1095	1207	907	621	1242	966	920	2153	1890	2712	2943	2561	2843	1617.62
Ala-Pro	0.0210199	0.0979407	24	3	1948.79	0.208245	0.675827	28	4.59e-05	7105.24	0.0281517	0.119048	26	1.62502	4790.83	1251.79	0.261289	9893	5081	7066	6381	8341	3757	5208	4288	3999	5587	2741	1363	2795	3623	3384	2767	4767.12
Asn-Val-Lys	0.0210199	0.0979407	24	18	3731.76	0.203654	0.666734	27.4766	17.9999	11374	0.0276266	0.117236	25.7383	18.0824	7084.45	2858.58	0.403502	9382	3477	3311	3480	5935	3359	2684	3650	4924	4626	14638	6220	11073	13717	12111	8595	6948.88
Cystathionine	0.0210199	0.0979407	18	3	36.416	0.229752	0.700313	26.1721	6.63e-05	258.25	0.0305845	0.124072	22.0861	1.84053	251.244	137.373	0.54677	375	193	141	324	202	258	218	136	215	165	174	139	399	430	441	298	256.75
Gly-Asn	0.0210199	0.0979407	24	15	387.141	0.139228	0.596796	23.6461	12	1002.5	0.0199999	0.0975869	23.8231	13.4896	701.386	266.226	0.379571	551	403	355	335	571	412	315	399	468	675	1570	1297	1063	811	1066	918	700.562
Gly-Phe	0.0210199	0.0979407	24	18	509.824	0.298799	0.788975	24.5682	17.9999	2642.25	0.0381256	0.140708	24.2841	18.0024	1952.37	651.181	0.333533	2925	1921	1195	1497	1598	1434	987	1168	1704	1826	2804	1516	2539	2429	3523	2078	1946.5
Myristoyl-L-carnitine	0.0210199	0.0979407	24	18	830.497	0.381792	0.8843	23.7736	17.9999	3619.5	0.0467482	0.159699	23.8868	18.0004	2868.73	405.081	0.141206	3045	1770	2201	2395	2495	1777	2266	1881	2180	3171	5654	2611	4225	3564	3421	3268	2870.25
N-Acetylalanine	0.0210199	0.0979407	24	3	13010.1	0.0609052	0.589446	28	4.79e-05	30124.7	0.00980741	0.0658822	26	1.62502	15045.8	4232	0.281275	41331	27083	29073	23012	30157	13850	11268	14119	10045	15808	4693	2032	3395	5152	4570	3862	14965.6
N-Acetylmethionine	0.0210199	0.0979407	24	3	94591.4	0.0763878	0.589446	28	7.92e-05	207936	0.0119368	0.0738708	26	1.62504	102619	30685.3	0.299021	297549	191019	200898	142280	238523	95680	85555	108502	59384	129256	16049	7274	10147	23577	13930	12985	102038
N-Lauroyl-L-arginine	0.0210199	0.0979407	24	6	1979.9	0.0785519	0.589446	28	6.63e-05	5568	0.0122289	0.0747929	26	3.25003	4064.35	658.933	0.162125	5409	3406	6468	6989	5630	6014	4881	4893	4321	5979	4716	2080	1068	1062	1136	1149	4075.06
N-Methylserine	0.0210199	0.0979407	24	3	28499.8	0.172005	0.621042	28	6.63e-05	107407	0.0239439	0.10831	26	1.62503	72787.1	4744.14	0.0651783	130683	95768	88202	114976	63785	107026	63539	78234	100569	53035	55639	28162	40172	57604	51877	33886	72697.3
Pseudouridine	0.0210199	0.0979407	24	6	12735	0.0299968	0.589446	28	4.59e-05	36956.2	0.00527687	0.0495045	26	3.25002	24966.4	840.043	0.033647	33891	34860	37807	41267	30968	34177	25121	29593	30472	20345	22114	14539	11347	12283	12085	8812	24980.1
Ser-Asp	0.0210199	0.0979407	24	18	7693.32	0.226608	0.700004	26.6465	17.9999	29621	0.0302316	0.123633	25.3233	18.0493	20031.1	7277.43	0.363307	26293	12860	13046	13720	18668	11407	7871	12321	15398	23384	30359	12301	23639	33544	39045	22256	19757
Ser-Ser	0.0210199	0.0979407	24	18	1072.68	0.111055	0.589446	28	17.9999	6165.24	0.0164807	0.0889701	26	18.1071	4022.07	1459.35	0.362836	4023	4099	2698	2351	3880	3029	1753	2627	3482	3136	3848	3525	8132	4590	6458	5481	3944.5
Sucrose	0.0210199	0.0979407	24	6	123004	0.0502996	0.589446	28	8.07e-05	488912	0.0083019	0.0609108	26	3.25004	355080	545.734	0.00153693	440027	403543	559767	552312	411578	523868	446316	462708	432090	407326	395268	521656	46478	22412	24190	31889	355089
Val-Ser	0.0210199	0.0979407	24	3	7954.77	0.28301	0.770755	26.9725	6.79e-05	28175.2	0.036434	0.136308	25.4862	1.59292	18117.2	8466.11	0.467298	34277	34077	19015	25332	16539	21620	11537	26643	28446	7986	3084	3435	14591	12430	15213	13338	17972.7
Val-Thr	0.0210199	0.0979407	24	3	6811.21	0.259697	0.733979	28	6.63e-05	18721.2	0.0339021	0.129973	26	1.62503	9989.98	348.589	0.0348939	30617	18047	11150	15071	8517	13217	8370	13014	17480	6784	2677	1259	3254	3486	4410	2381	9983.38
unknown1094	0.0210199	0.0979407	24	6	4929.24	0.15044	0.602253	28	5.99997	10404.5	0.0213656	0.101434	26	6.0357	7162.49	2001.56	0.27945	15509	5647	10464	9736	14428	6381	10583	10226	4421	11250	6151	2213	2446	2642	2849	1833	7298.69
unknown1097	0.0210199	0.0979407	24	3	4109.7	0.145809	0.600224	28	6.63e-05	18761.2	0.0208036	0.100108	26	1.62503	13554.1	266.596	0.019669	22004	19048	15290	18703	12818	16159	13060	15082	17884	10704	11610	6824	7846	11414	10411	7928	13549.1
unknown1108	0.0210199	0.0979407	24	6	960.251	0.347102	0.849792	20.6557	6	2966.75	0.0431957	0.151456	22.3279	6.03384	1504.01	1200.17	0.797978	1780	857	820	2568	2438	2723	5964	742	442	1799	473	483	519	389	581	481	1441.19
unknown1215	0.0210199	0.0979407	24	3	952.473	0.173619	0.622042	28	6.63e-05	4543.74	0.0241345	0.108802	26	1.62503	3179.93	421.845	0.132659	5875	3820	3450	5030	3304	4281	2570	3004	3302	2694	2770	1407	2049	2907	2567	1721	3171.94
unknown1231	0.0210199	0.0979407	24	3	140644	0.0974408	0.589446	28	7.55e-05	475392	0.0147281	0.0825427	26	1.62504	327053	31268.9	0.0956081	536905	391949	442973	529742	267343	478939	362326	367208	413533	294790	215526	127852	164636	244749	217277	167630	326461
unknown1236	0.0210199	0.0979407	24	3	72421.5	0.1958	0.656037	28	6.63e-05	473981	0.026723	0.114568	26	1.62503	372207	26594.9	0.0714519	547011	461957	414545	472414	329381	417700	372046	408006	449511	322233	326391	209770	277738	361469	317791	259297	371704
unknown1276	0.0210199	0.0979407	24	3	9637.16	0.127045	0.589446	28	6.63e-05	48315.4	0.0184944	0.0936801	26	1.62503	32861.9	518.571	0.0157803	60174	46860	38180	48048	28259	33792	30896	37756	39703	27877	27116	16546	20125	25738	25525	19039	32852.1
unknown1318	0.0210199	0.0979407	24	3	1068.44	0.125595	0.589446	28	6.63e-05	4382.49	0.0183135	0.0932719	26	1.62503	2877.6	265.35	0.0922121	5750	4005	4092	3683	3142	3130	2839	2995	3566	2862	2609	1075	1591	1869	1701	1213	2882.62
unknown1394	0.0210199	0.0979407	24	3	1904.59	0.0710971	0.589446	28	6.63e-05	7843.24	0.0112173	0.0709701	26	1.62503	5274.14	95.0325	0.0180186	9302	7671	6134	8266	5069	5480	5537	5833	6040	4805	4088	3094	3107	3635	3946	2408	5275.94
unknown1398	0.0210199	0.0979407	18	3	830.497	0.325336	0.820116	26.9725	4.1e-05	6702.75	0.0409298	0.146475	22.4862	1.87387	6973.88	3696.49	0.530047	7959	4850	4703	9299	6733	5820	5354	5580	4206	6567	5067	4070	7426	14265	9793	11594	7080.38
unknown1417	0.0210199	0.0979407	24	18	783.828	0.0801174	0.589446	28	18	2304.25	0.0124394	0.0749855	26	18.1071	1368.89	535.19	0.390968	1289	466	766	944	962	609	995	594	659	1037	2472	1437	2617	2459	2045	2096	1340.44
unknown1428	0.0210199	0.0979407	24	18	1096.02	0.317629	0.814053	23.6461	17.9999	3510.5	0.0401203	0.145046	23.8231	18.001	2428.1	850.788	0.350392	3974	1986	857	1563	2169	1235	812	1063	1845	2598	4412	2374	3441	3603	4553	2445	2433.12
unknown1475	0.0210199	0.0979407	24	3	3769.23	0.0997967	0.589446	28	5.19e-05	7685.73	0.0150341	0.0832544	26	1.62502	3332.93	1134.93	0.340522	10501	8242	8205	3795	8479	2279	1797	3578	1226	4164	99	33	93	281	127	84	3311.44
unknown1506	0.0210199	0.0979407	24	3	6780.09	0.0495417	0.589446	28	6.63e-05	12927.5	0.00819262	0.0609108	26	1.62503	6772.52	2136.47	0.315462	15192	11812	14454	10252	16090	7658	8347	6681	3820	9685	617	384	481	934	596	710	6732.06
unknown152	0.0210199	0.0979407	24	3	3844.19	0.0813114	0.589446	28	4.49e-05	17010.7	0.0125995	0.0755813	26	1.62502	13001	231.477	0.0178046	19131	14849	16139	17924	13305	15158	13548	15814	13047	14951	11684	6495	6855	9717	9561	9768	12996.6
unknown1536	0.0210199	0.0979407	24	3	4729.66	0.218186	0.688099	28	6.63e-05	19134.5	0.0292817	0.121615	26	1.62503	11056.4	897.8	0.0812016	29747	14220	12107	20464	11768	13684	8511	10749	13630	8610	7475	2674	4160	7318	7543	3971	11039.4
unknown1593	0.0210199	0.0979407	18	0	686.247	0.372554	0.874287	24.5682	17.9999	2842.75	0.0458089	0.157659	21.2841	18.439	2534.91	648.403	0.25579	3857	2474	3083	3718	1641	2346	1984	2113	2494	2263	2949	1491	2477	3706	2312	2876	2611.5
unknown1598	0.0210199	0.0979407	24	3	2295.8	0.0792113	0.589446	28	7.93e-05	8023.99	0.0123176	0.0747929	26	1.62504	5737.97	549.443	0.0957557	8398	7727	7265	8706	4929	7840	6003	6848	7149	5131	3921	2661	3317	4656	3903	3187	5727.56
unknown1600	0.0210199	0.0979407	24	3	7766.86	0.11355	0.589446	28	6.63e-05	29541.2	0.0167979	0.0896981	26	1.62503	18113.2	1546.69	0.0853901	40802	27621	21796	27946	16248	21483	17116	21029	23277	13319	11832	6562	9456	11410	13001	6444	18083.9
unknown1604	0.0210199	0.0979407	24	3	6317.29	0.0814606	0.589446	28	7.85e-05	25479.7	0.0126195	0.0755813	26	1.62504	18575.7	2033.51	0.109471	28914	21234	24117	27654	16421	25742	19600	20150	20944	16604	14593	9113	10918	15428	13827	11336	18537.2
unknown1609	0.0210199	0.0979407	24	3	4958.94	0.0794002	0.589446	28	4.11e-05	14310.7	0.012343	0.0747929	26	1.62502	8814.28	1018.28	0.115526	19420	16034	9176	12613	8267	11701	8938	13290	8116	9013	6915	1933	3089	5164	3423	3628	8795
unknown161	0.0210199	0.0979407	24	3	3400.48	0.061331	0.589446	28	7.3e-05	9353.99	0.00986699	0.0658822	26	1.62503	6172.87	125.287	0.0202965	9539	8386	8913	10578	6488	6932	5928	8381	8390	3514	5407	2975	3493	3327	3094	3383	6170.5
unknown1611	0.0210199	0.0979407	24	18	2216.25	0.194504	0.655061	28	17.9999	6162.73	0.0265732	0.114307	26	18.1071	3556.56	1657.86	0.466141	4320	1687	1779	1782	3511	1546	1362	1443	1373	2670	6652	2719	4819	5526	8508	5798	3468.44
unknown1632	0.0210199	0.0979407	24	18	1537.25	0.210239	0.67679	28	17.9999	4858.74	0.0283792	0.119828	26	18.1071	3118.38	1074.65	0.344617	3536	1631	1987	1649	3635	1162	1408	1611	1598	3359	5447	2522	4142	6153	5205	3935	3061.25
unknown1639	0.0210199	0.0979407	24	3	2127.86	0.132234	0.592036	28	7.61e-05	9500.23	0.0191384	0.0952144	26	1.62504	6652.35	916.35	0.137748	12137	7713	7989	10162	6051	7773	6471	7833	8210	5581	4498	2894	4731	4944	5478	3695	6635
unknown1716	0.0210199	0.0979407	24	6	4628.54	0.0537149	0.589446	28	6.76e-05	13753.5	0.00879142	0.062594	26	3.25003	9240.51	50.6282	0.00547894	16878	12447	12370	13319	12354	14291	9015	11125	11094	11077	11195	5888	1568	1784	1998	1432	9239.69
unknown1719	0.0210199	0.0979407	24	21	929.138	0.0969471	0.589446	28	17.9999	4302.98	0.0146639	0.082529	26	19.7321	2137.12	1319.58	0.617456	2279	1703	856	964	1551	1244	542	930	1364	1276	2017	630	3202	5320	5591	3099	2035.5
unknown1775	0.0210199	0.0979407	24	3	1115.11	0.0881982	0.589446	28	7.87e-05	4044.74	0.0135159	0.0788682	26	1.62504	2819.56	26.4202	0.00937033	4829	4083	3585	3682	2761	3573	2910	3318	3818	2103	2442	1356	1428	2107	1620	1506	2820.06
unknown1803	0.0210199	0.0979407	24	18	2443.58	0.183076	0.637114	26.0177	17.9999	7464.49	0.025245	0.111485	25.0088	18.0293	5381.6	1290.65	0.239826	5916	3629	3664	3412	5026	3066	3238	3092	3164	4726	7814	8888	8314	7838	7869	5837	5343.31
unknown1888	0.0210199	0.0979407	24	0	1379.74	0.176151	0.627087	24.8451	6.63e-05	4848.74	0.0244328	0.109457	24.4225	3.26e-05	3205.71	1806.32	0.563469	4825	2660	5545	6365	942	4072	2889	2172	2957	2442	1164	775	3307	3931	3452	3412	3181.88
unknown1915	0.0210199	0.0979407	24	3	1859.16	0.18504	0.638405	28	5.81e-05	7710.24	0.0254743	0.112287	26	1.62503	5836.41	870.156	0.149091	9741	6107	6822	8171	5560	6905	5778	7854	7618	4575	3875	3073	4275	4429	4979	3357	5819.94
unknown1937	0.0210199	0.0979407	24	21	1123.59	0.255517	0.729532	24.7059	17.9999	4359.74	0.0334435	0.129102	24.3529	19.5258	2992.67	1368.86	0.457405	4212	3904	2126	3423	2785	2080	1219	1821	2556	1859	2621	1513	3065	5388	6353	2633	2972.38
unknown198	0.0210199	0.0979407	24	0	759.079	0.33211	0.829829	26.6465	6.63e-05	9123.74	0.0416382	0.147018	25.3233	3.15e-05	7549.43	1275.82	0.168995	10314	8654	7652	9875	6983	8182	5262	7302	7424	6960	7238	4847	6391	7853	7599	7498	7502.12
unknown2132	0.0210199	0.0979407	18	3	1220.82	0.359655	0.860214	26.0177	7.19e-05	11291	0.0444893	0.15444	22.0088	1.8341	10925.4	5268.96	0.482265	16280	9490	6998	12396	8412	13422	9120	7039	8050	8437	8329	6321	18365	16201	18008	11516	11149
unknown2166	0.0210199	0.0979407	24	18	1735.24	0.140391	0.596796	27.8233	17.9999	8585.47	0.0201423	0.0980294	25.9117	18.0985	4802.17	2554.1	0.531864	5607	4630	1787	2385	3900	3232	1864	2106	3549	2910	4888	3540	6943	8186	12878	6335	4671.25
unknown2204	0.0210199	0.0979407	24	0	880.348	0.152125	0.602253	25.1282	6.63e-05	3666.24	0.0215693	0.101434	24.5641	3.24e-05	2632.91	1087.09	0.412885	4015	4169	2490	3991	1832	2831	2306	1812	1884	1885	2223	1282	2164	3463	3620	1858	2614.06
unknown222	0.0210199	0.0979407	24	6	26457.8	0.11988	0.589446	28	6.63e-05	51686	0.0175976	0.0916321	26	3.25003	31398.1	8362.03	0.266323	48665	51071	38550	68458	32054	57061	33574	57757	64133	28743	9921	6036	2985	1658	2224	1655	31534.1
unknown257	0.0210199	0.0979407	24	18	1879.84	0.262835	0.739489	28	18	6921.24	0.0342453	0.131002	26	18.1071	5053.57	954.764	0.188929	5567	3706	3040	2878	5893	3386	2411	3463	5651	4099	8390	3876	6636	6758	8411	5880	5002.81
unknown266	0.0210199	0.0979407	24	21	3016.87	0.22253	0.694721	23.7736	17.9999	24363.2	0.0297725	0.122559	23.8868	19.4933	21463.5	3618.14	0.168572	26911	21378	20735	24482	18260	20463	15287	19315	20290	20389	21099	17635	19512	28130	26684	23127	21481.1
unknown274	0.0210199	0.0979407	24	6	4531.49	0.0587645	0.589446	28	6.63e-05	11983.7	0.0095069	0.065294	26	3.25003	8090.52	1086.5	0.134293	13590	7664	11613	15068	11610	9950	10890	9662	8160	10866	8086	3390	2074	2250	2545	2313	8108.19
unknown318	0.0210199	0.0979407	24	3	3538.19	0.175804	0.626654	28	7.57e-05	15270	0.024392	0.10945	26	1.62504	10960.2	1363.85	0.124436	16322	14086	12597	18075	12937	13366	8474	11382	12302	11259	8191	3920	5545	8155	10700	7639	10934.4
unknown332	0.0210199	0.0979407	24	3	14079.6	0.110982	0.589446	28	4.96e-05	53326	0.0164714	0.0889701	26	1.62502	39182.6	913.892	0.0233239	58401	51073	49763	54067	32181	51654	41621	45746	48302	39950	28773	19362	25089	31730	27211	21722	39165.3
unknown343	0.0210199	0.0979407	24	21	872.57	0.151607	0.602253	26.6465	6.63e-05	3736.5	0.0215066	0.101434	25.3233	23.7406	3879.68	1155.51	0.297837	3504	3195	3676	4571	3248	3215	2999	3416	3583	2270	3783	2709	4182	5509	5120	6125	3819.06
unknown359	0.0210199	0.0979407	24	3	1440.02	0.254154	0.729532	28	7.12e-05	4587.74	0.0332936	0.12888	26	1.62503	3098.61	137.733	0.0444501	5635	4596	3031	5089	2429	3920	3367	4003	5019	1960	1914	1292	1545	2155	2244	1337	3096
unknown36	0.0210199	0.0979407	18	3	746.705	0.543477	1	25.5652	5.94e-05	5292.25	0.0625118	0.194721	21.7826	1.81524	5009.28	1916.89	0.382668	6767	4749	4407	5246	5332	4751	3845	3791	7155	2935	2608	2655	6693	7278	8065	5394	5104.44
unknown361	0.0210199	0.0979407	24	21	5351.21	0.128755	0.591046	25.1282	6.63e-05	12958.5	0.0187071	0.0939056	24.5641	23.0289	11682.9	5671.41	0.485446	15427	10439	10472	15496	7667	12391	5710	6800	10958	6093	7911	6259	10454	19105	20390	19230	11550.1
unknown393	0.0210199	0.0979407	24	3	7438.76	0.0676761	0.589446	28	5.81e-05	35168.2	0.0107478	0.0692771	26	1.62503	26900.4	1583.45	0.0588634	36507	34781	32025	37360	27348	34733	24643	30372	29757	26328	26843	16825	18093	19688	18584	16999	26930.4
unknown561	0.0210199	0.0979407	24	6	5061.65	0.219026	0.68918	28	6	10872.2	0.0293768	0.121829	26	6.03571	7408.82	1971.95	0.266163	15328	4996	14099	9044	16825	5852	10943	9869	3774	11314	6586	1909	2226	2908	3360	1655	7543
unknown574	0.0210199	0.0979407	24	3	5869.34	0.0612241	0.589446	28	4.32e-05	12535.2	0.00985203	0.0658822	26	1.62502	6358.37	1729.32	0.271975	17101	11842	11958	9240	13828	6288	5814	7039	4017	8346	1069	454	730	1562	1048	874	6325.62
unknown575	0.0210199	0.0979407	24	3	1046.16	0.178528	0.630663	28	6.63e-05	4397.49	0.0247122	0.110355	26	1.62503	3004.2	96.5575	0.0321408	5750	4145	3172	4523	2911	3894	2501	3135	3659	2652	2376	1379	1536	2487	2226	1692	3002.38
unknown68	0.0210199	0.0979407	18	12	1754.16	0.382771	0.885328	20	12	12825.5	0.0468475	0.15984	19	12.0333	10070.4	3271.74	0.324886	5749	7445	10538	8554	9936	10172	11233	10637	8411	11074	13267	18550	8530	5796	5596	9455	9683.94
unknown726	0.0210199	0.0979407	24	3	2136.88	0.173053	0.622042	28	6.63e-05	12713.7	0.0240677	0.108694	26	1.62503	9330.1	652.412	0.0699254	15597	11297	10737	13224	9170	10615	8324	9503	11085	8239	8195	4301	6184	7862	8100	6651	9317.75
unknown860	0.0210199	0.0979407	24	3	2710.69	0.241524	0.713924	28	6.63e-05	11440.5	0.031898	0.125718	26	1.62503	6661.89	418.254	0.0627831	18667	8942	8006	10147	7563	6470	5526	7085	7027	6513	5640	2328	2568	4184	3718	2333	6669.81
unknown916	0.0210199	0.0979407	24	6	6157.84	0.0732829	0.589446	28	6.63e-05	14981.2	0.0115156	0.0719015	26	3.25003	10064	1427.38	0.14183	11798	12317	17910	17900	10776	17745	10362	14722	15753	10278	8130	5607	2046	2089	1763	2200	10087.2
unknown918	0.0210199	0.0979407	24	18	2225.97	0.533037	1	24.2975	17.9999	7541.75	0.0615283	0.193289	24.1488	18.0007	5305.62	1160.56	0.218741	5757	3589	2893	2541	4070	3151	1958	3356	3605	3173	14419	6122	7717	6288	9853	6309	5300.06
unknown921	0.0210199	0.0979407	24	18	1998.99	0.238662	0.71182	21.253	17.9999	4523	0.0315798	0.125376	22.6265	18.0665	3123.23	1064.59	0.340861	6061	2315	897	1370	1104	1815	569	1230	2807	3294	6249	5054	3725	4641	6127	3599	3178.56
unknown922	0.0210199	0.0979407	24	21	1424.47	0.113902	0.589446	26.6465	17.9999	6007.98	0.0168425	0.0896981	25.3233	19.632	3823.6	1512.97	0.395692	4882	3825	2180	2555	3417	2504	1398	2121	3320	2844	5112	1709	5017	7077	6464	5474	3743.69
unknown940	0.0210199	0.0979407	18	3	486.313	0.151811	0.602253	25.5652	6.63e-05	4731.24	0.0215312	0.101434	21.7826	1.81525	4309.71	2488.65	0.577453	8073	3604	2819	4429	2664	3048	3191	3562	2855	2848	4102	1846	6853	7615	7791	5632	4433.25
unknown960	0.0210199	0.0979407	24	3	30278.3	0.124145	0.589446	28	6.63e-05	109951	0.0181325	0.092869	26	1.62503	73198.9	1345.19	0.0183772	143978	99435	81327	115064	76830	94778	62764	80713	92448	61459	55241	33792	36399	51444	50875	34228	73173.4
unknown983	0.0210199	0.0979407	24	3	18791.7	0.102383	0.589446	28	5.74e-05	35625.9	0.0153686	0.0844367	26	1.62503	17394	6996.64	0.402245	51266	28871	39373	22994	50604	14305	15015	17111	11134	18191	1400	749	936	1933	954	1348	17261.5
unknown135	0.0254844	0.115612	24	3	912.345	0.102503	0.589446	28	5.35e-05	4140.5	0.0181486	0.092869	26	1.62502	3189.9	189.256	0.0593299	4633	3647	3818	4464	3189	3671	3515	3844	3170	3647	2911	1384	1680	2464	2526	2418	3186.31
2'-O-Methyluridine	0.0299489	0.115612	24	6	1683.62	0.11665	0.589446	27.3065	6	2992	0.023256	0.106662	25.6533	6.02502	1790.59	656.508	0.366644	2845	2636	3993	2053	5154	1821	3102	1891	2655	1618	283	131	204	382	220	249	1827.31
DL-Indole-3-lactic acid	0.0299489	0.115612	24	3	68687.3	0.114848	0.589446	28	6.63e-05	246799	0.0229502	0.106419	26	1.62503	164773	1399.15	0.00849142	302651	247534	195992	241022	144535	211330	159571	192078	217261	137013	134929	67248	82436	115919	112464	74803	164799
Erlose	0.0299489	0.115612	24	6	127726	0.087348	0.589446	28	6.00001	340109	0.0181709	0.092869	26	6.03572	240017	114874	0.478608	189239	328321	419694	370222	218813	418891	371538	351195	410574	298328	190248	284940	36398	25017	24355	27572	247834
Glyceraldehyde	0.0299489	0.115612	18	0	2638.57	0.326166	0.820116	25.2722	6.63e-05	20121	0.0549821	0.178852	21.6361	2.84e-05	16938.2	2364.8	0.139614	20557	18590	17431	23906	15839	18066	12064	16496	16582	15533	16716	12136	15796	18976	17397	18520	17162.8
His-Asp	0.0299489	0.115612	24	21	639.755	0.308932	0.801328	22.3291	17.9999	3770.74	0.0525792	0.173549	23.1646	19.4712	2977.44	772.492	0.259448	4534	2959	2229	3336	2012	2513	1468	2213	3121	3190	3595	1845	3374	3319	4968	3422	3006.12
Ile-Ser	0.0299489	0.115612	24	3	118125	0.357297	0.858361	28	6.63e-05	288489	0.0592544	0.188285	26	1.62503	172502	5656.95	0.0327936	387271	319515	166642	280530	169628	259257	133628	229119	360132	118814	50121	20765	64146	60777	88214	53182	172609
Kynurenic acid	0.0299489	0.115612	24	6	437.522	0.208783	0.676788	28	6.63e-05	1872.25	0.0379843	0.140602	26	3.25003	1149.25	330.19	0.28731	2543	1268	1183	2495	1290	957	999	1561	1046	998	1207	700	400	616	578	461	1143.88
L-Cystine	0.0299489	0.115612	24	3	11454.2	0.122064	0.589446	28	7.53e-05	32350.7	0.0241695	0.108802	26	1.62503	20036.7	2253.95	0.112491	37399	27556	27662	36786	13013	30732	23902	22533	29588	13768	10108	6308	8182	14303	11671	6393	19994
Met-Trp	0.0299489	0.115612	24	6	699.329	0.0902098	0.589446	28	6.63e-05	1617.5	0.0186791	0.0939056	26	3.25003	1042.89	233.264	0.22367	2249	1442	1213	1566	1579	1634	984	1292	1491	994	540	195	385	436	490	257	1046.69
Methionine	0.0299489	0.115612	24	3	55176.6	0.179185	0.630663	28	6.63e-05	293187	0.0334198	0.129102	26	1.62503	213937	10968.3	0.0512692	359232	270154	240480	302885	215241	248168	193334	217363	263058	186399	187965	97108	135220	183024	178709	141321	213729
Methylsuccinic acid	0.0299489	0.115612	24	0	506.642	0.359837	0.860214	26.0177	6.63e-05	3160.74	0.0595992	0.18881	25.0088	3.19e-05	2306.85	738.969	0.320336	2871	2156	4744	2872	2427	1807	1840	1555	1647	2126	1883	1516	1746	2383	2371	2618	2285.12
N-Acetylleucine	0.0299489	0.115612	24	3	78488.7	0.118684	0.589446	28	6.2e-05	149224	0.0235999	0.107272	26	1.62503	73347.9	31511.1	0.429612	215226	118104	168074	95492	226602	55082	68678	68289	46919	74475	5500	2559	3342	7446	3532	4700	72751.2
N-Acetylmannosamine	0.0299489	0.115612	24	3	12330	0.152031	0.602253	28	6.63e-05	54864.4	0.0291036	0.121523	26	1.62503	37845.4	5293.09	0.139861	61273	52084	44365	61736	42628	46364	27485	37249	42709	36776	27960	12307	19108	29529	36030	26320	37745.2
N-Isovalerylglycine	0.0299489	0.115612	24	3	39632.6	0.0610857	0.589446	28	6.6e-05	73613.2	0.0133618	0.0783464	26	1.62503	39292.8	11360.3	0.28912	83537	64315	83643	62958	99053	40317	46652	36023	23001	54390	7137	3566	4708	7181	4417	4345	39077.7
N-omega-Acetylhistamine	0.0299489	0.115612	18	0	2361.74	0.824776	1	27.6489	17.9999	4084.75	0.116118	0.30116	22.8245	18.8418	4445.16	1724.33	0.387913	5730	9269	4681	8609	2710	3241	1465	4323	2998	2235	8593	2302	4322	3715	3455	4847	4530.94
Phe-Asn	0.0299489	0.115612	24	0	1308.15	0.291803	0.780846	27.6489	6.63e-05	8690.22	0.0501624	0.167866	25.8245	3.1e-05	4845.13	2690.35	0.555269	14217	4425	6114	10005	2169	5306	4138	2905	3436	4046	2601	1045	2858	4986	4265	2945	4716.31
Phenylalanine	0.0299489	0.115612	24	3	276542	0.106539	0.589446	28	6.63e-05	1.03006e+06	0.0215294	0.101434	26	1.62503	695481	1242.79	0.00178695	1296037	923582	802911	1097717	733710	874292	620618	766882	876304	605998	539157	327254	356566	481601	485809	338875	695457
Pro-Leu	0.0299489	0.115612	24	3	11515.2	0.0874108	0.589446	28	7.09e-05	29090.2	0.0181821	0.092869	26	1.62503	17383.5	368.452	0.0211955	36562	25103	24115	30581	17711	21953	21789	23207	28451	14837	8689	2695	4684	7342	7170	3358	17390.4
Ser-Tyr	0.0299489	0.115612	18	3	199.581	0.390616	0.897292	26.0177	6.63e-05	2328	0.0637371	0.197876	22.0088	1.8341	2265.65	757.983	0.334554	2931	2922	1651	1808	2265	2368	1271	2065	2239	1557	2137	1392	2992	3048	3424	2695	2297.81
Tropic acid	0.0299489	0.115612	24	3	7210.01	0.15286	0.602253	28	6.63e-05	31742.7	0.0292374	0.121612	26	1.62503	21863.4	155.35	0.00710549	38863	31617	25998	30493	19694	26416	20447	24177	29307	18249	18082	9596	12751	16885	16121	11165	21866.3
Tryptophan	0.0299489	0.115612	24	3	35582	0.10709	0.589446	28	6.63e-05	122037	0.0216243	0.101434	26	1.62503	79557.5	1109.81	0.0139498	157103	111128	90719	129197	82910	101840	72797	89321	103328	68430	60774	33058	35504	51553	50084	35511	79578.6
Uridine	0.0299489	0.115612	24	3	292745	0.0642017	0.589446	28	6.63e-05	1.34242e+06	0.0139478	0.0805968	26	1.62503	998544	12006.4	0.0120239	1516671	1310872	1163921	1378212	990898	1284637	901224	1075993	1079222	913374	911116	621818	674606	752588	741675	656244	998317
Valine	0.0299489	0.115612	24	3	22352	0.101225	0.589446	28	6.63e-05	92094.6	0.0206107	0.0996957	26	1.62503	64761	903.889	0.0139573	107097	82410	74784	104088	66936	84918	58547	66043	72122	65018	53310	31648	36654	47502	49502	35323	64743.9
unknown1004	0.0299489	0.115612	24	3	1240.62	0.140374	0.596796	28	6.36e-05	4905.99	0.0272073	0.116065	26	1.62503	3490.86	81.589	0.0233722	5739	4612	4233	5040	3156	4467	3384	4223	4732	2933	2725	1569	1887	2855	2656	1618	3489.31
unknown1027	0.0299489	0.115612	24	3	22904.4	0.135645	0.595121	28	6.63e-05	76469.6	0.0264301	0.114307	26	1.62503	41898.6	2626.85	0.0626954	108567	59467	60250	77595	40034	52043	33191	42623	41086	53389	26694	8447	10057	22836	20028	14867	41948.4
unknown1101	0.0299489	0.115612	24	18	5993.44	0.18771	0.639825	27.1385	17.9999	104125	0.0347485	0.131592	25.5692	18.068	82659.9	15888.5	0.192215	80774	79026	72133	79285	68212	67356	71880	74859	82559	72431	81667	64806	75741	107651	128120	104987	81967.9
unknown1135	0.0299489	0.115612	24	18	1156.83	0.0653613	0.589446	28	17.9999	4557.98	0.0141647	0.0812555	26	18.1071	2137.7	1464.15	0.684915	1481	568	1066	1948	1217	749	1014	935	612	1417	2683	1036	4328	3536	4210	6158	2059.88
unknown1178	0.0299489	0.115612	24	3	8661.7	0.155742	0.604555	28	7.75e-05	46280.7	0.0297014	0.122447	26	1.62504	36223.9	4571.37	0.126198	55894	43043	38414	47772	32203	43907	35623	42566	39870	31393	31649	19962	25341	35669	28986	25905	36137.3
unknown1203	0.0299489	0.115612	24	3	998.788	0.184595	0.638405	28	4.4e-05	4238.5	0.0342643	0.131002	26	1.62502	3236.45	66.7018	0.0206096	4540	4166	3955	4293	2873	3605	3464	3994	4482	2866	2533	1622	2061	2674	2594	2041	3235.19
unknown1229	0.0299489	0.115612	24	6	689.429	0.149322	0.602253	26.9725	6	6432.25	0.0286653	0.120722	25.4862	6.02047	5811.96	487.992	0.0839634	5352	5786	6857	6765	6326	7083	5736	6584	5793	5839	6067	5148	5442	4758	4782	5065	5836.44
unknown1250	0.0299489	0.115612	24	3	2533.56	0.165326	0.616258	28	6.63e-05	12444.2	0.0312335	0.124566	26	1.62503	9218.54	344.299	0.0373486	12598	11940	10828	14411	9159	11638	7973	9607	10767	10027	7603	5029	5046	7692	7314	5969	9225.06
unknown1255	0.0299489	0.115612	24	3	846.407	0.232694	0.704279	28	6.63e-05	4051.74	0.0415787	0.147018	26	1.62503	2781	415.668	0.149467	5862	3589	2895	3861	3183	3412	2227	2638	3013	2535	2119	1045	1653	2377	2374	1587	2773.12
unknown1261	0.0299489	0.115612	24	3	2149.96	0.270368	0.75398	28	6.63e-05	11304.7	0.0470954	0.160272	26	1.62503	7702.97	807.293	0.104803	15606	8877	8519	12217	7956	9664	6100	7020	9193	6583	5820	3167	4304	6833	6892	4252	7687.69
unknown1287	0.0299489	0.115612	24	18	1525.58	0.263283	0.740002	28	17.9999	5675.24	0.0460706	0.157964	26	18.1071	3955.82	903.15	0.228309	4269	2510	2470	2481	5181	2035	1819	2551	3243	4688	5690	2887	4544	6620	6957	4580	3907.81
unknown1333	0.0299489	0.115612	24	21	1022.48	0.0824023	0.589446	26.9725	17.9999	4033.99	0.0172859	0.090686	25.4862	19.6543	2451.92	1057.06	0.431118	3393	2227	1224	1421	1917	1440	1165	1342	1868	2117	2886	1100	3353	4466	4493	3824	2389.75
unknown1393	0.0299489	0.115612	24	3	3316.33	0.136566	0.595555	28	6.63e-05	12053.7	0.0265818	0.114307	26	1.62503	8074.18	88.8669	0.0110063	15689	11771	9385	11370	7420	10092	7575	9237	10851	6432	6224	3527	4429	5756	5345	4057	8072.5
unknown1397	0.0299489	0.115612	24	21	376.358	0.686156	1	24.5682	17.9999	2941.24	0.100383	0.270434	24.2841	19.5202	2303.15	643.921	0.279583	4101	1865	1991	2024	1658	1841	1628	1917	1958	2043	2788	1148	2359	3275	3993	2138	2295.44
unknown1443	0.0299489	0.115612	24	3	6343.45	0.11662	0.589446	28	6.63e-05	25057.5	0.0232509	0.106662	26	1.62503	17535.6	50.2439	0.00286525	29498	25709	21285	23738	15316	21674	17895	20075	23563	14202	14138	8651	10165	12741	12921	9014	17536.6
unknown146	0.0299489	0.115612	24	6	1584.98	0.0755125	0.589446	28	5.86e-05	5747.75	0.0160381	0.0872558	26	3.25003	4267.85	270.562	0.0633954	6020	4545	5612	6814	4052	6326	4642	4945	4966	4422	3639	2448	2341	2744	2200	2640	4272.25
unknown1461	0.0299489	0.115612	24	6	1670.01	0.164055	0.616258	28	6.63e-05	3863	0.0310313	0.124423	26	3.25003	2504.45	429.675	0.171565	5115	1972	4115	4250	4804	1870	3087	3323	1291	3805	2366	907	565	831	997	885	2511.44
unknown1505	0.0299489	0.115612	24	3	4312.29	0.13161	0.592036	28	6.63e-05	17422	0.0257628	0.112879	26	1.62503	12312.6	273.342	0.0222002	20866	16894	15019	16909	10929	15688	11651	14047	16172	10036	10098	5848	7024	9812	9255	6671	12307.4
unknown155	0.0299489	0.115612	24	3	3981.54	0.0875177	0.589446	28	4.69e-05	15196.2	0.0182011	0.092869	26	1.62502	11023.4	237.979	0.0215885	17453	14033	13765	15534	10591	13445	13342	12947	14479	10276	8481	4788	5724	8100	8235	5110	11018.9
unknown1554	0.0299489	0.115612	24	3	4104.75	0.116077	0.589446	28	4.07e-05	12924.7	0.0231589	0.106662	26	1.62502	8047.42	721.877	0.0897029	19310	13367	8214	10808	7830	10561	7896	12192	7573	8642	6070	2014	2838	4974	3059	3192	8033.75
unknown1610	0.0299489	0.115612	24	6	89131.7	0.18827	0.640805	28	8e-05	280206	0.0348353	0.131742	26	3.25004	184431	8586.97	0.0465592	281708	149464	302849	386806	98492	316314	240397	222957	199190	190170	177936	119133	44029	70614	71903	76703	184292
unknown1638	0.0299489	0.115612	24	6	2134.76	0.115483	0.589446	28	6.63e-05	5767.75	0.023058	0.106662	26	3.25003	3984.14	1113.76	0.27955	5605	5346	5035	7085	3104	5819	5922	5753	5733	2615	2775	815	1657	2920	2718	1134	4002.25
unknown1675	0.0299489	0.115612	24	3	6165.62	0.0519225	0.589446	28	4.93e-05	12328.5	0.0116102	0.0723306	26	1.62502	6122.19	894.78	0.146153	16349	12253	10539	10173	11370	6847	4376	7731	4816	7879	1491	451	546	1416	782	665	6105.25
unknown1677	0.0299489	0.115612	24	18	1038.39	0.363547	0.86354	26.9725	17.9999	3795.99	0.0601021	0.1898	25.4862	18.0614	2312.15	1116.93	0.483071	3668	1715	884	1059	2188	1030	727	1167	1320	1892	4190	1227	2705	4912	4830	2737	2265.69
unknown1691	0.0299489	0.115612	24	3	3375.9	0.169984	0.620162	28	6.63e-05	9898.98	0.031972	0.125718	26	1.62503	5152.55	79.8162	0.0154906	15381	7845	6452	9918	4231	6127	5298	6098	8024	3750	2334	670	1244	2057	2233	803	5154.06
unknown1726	0.0299489	0.115612	24	6	3307.85	0.140563	0.596796	28	8.09e-05	10255.5	0.0272384	0.116065	26	3.25004	7544.68	104.272	0.0138206	7105	9745	12116	12056	7075	12848	7851	9208	11607	8776	6467	5830	2412	2726	2647	2273	7546.38
unknown1801	0.0299489	0.115612	24	3	1794.99	0.226126	0.700004	28	6.63e-05	5126.74	0.040599	0.146007	26	1.62503	2776.73	393.972	0.141883	7547	4447	3628	4885	3270	3436	2029	2901	4856	2756	949	349	879	906	986	723	2784.19
unknown1813	0.0299489	0.115612	24	3	1236.73	0.154904	0.604555	28	6.63e-05	4666.74	0.0295667	0.122434	26	1.62503	2745.02	783.233	0.285329	5248	3174	4293	5952	780	3738	2668	3243	2901	2159	1047	995	1425	2544	2098	1418	2730.19
unknown1841	0.0299489	0.115612	24	18	709.228	0.880808	1	24.0327	17.9999	2652.74	0.122273	0.311655	24.0163	18	1687.76	1302.5	0.771732	6568	949	541	676	1266	638	376	575	990	1659	1540	604	1825	2772	3940	2074	1687.06
unknown1869	0.0299489	0.115612	24	6	1614.32	0.198948	0.660242	28	6.45e-05	5223	0.0364824	0.136308	26	3.25003	3619.9	55.4063	0.015306	5491	2906	5748	6747	1902	6131	4666	4557	4028	3845	3643	2492	1111	1607	1457	1573	3619
unknown187	0.0299489	0.115612	24	3	8138.45	0.065434	0.589446	28	6.63e-05	36367.2	0.0141782	0.0812555	26	1.62503	26576.7	498.076	0.0187411	42758	34520	31350	36841	25922	35267	23197	29440	27647	23827	24264	16912	16919	19829	19362	17021	26567.2
unknown1880	0.0299489	0.115612	24	21	1538.66	0.0693557	0.589446	27.1385	17.9999	6141.73	0.0149071	0.0832113	25.5692	19.6661	3506.08	1766.49	0.503837	4511	3560	1613	2007	2768	2266	1287	1973	2159	2340	3095	2204	4886	6996	6986	5699	3396.88
unknown1956	0.0299489	0.115612	24	18	1124.65	0.252323	0.727979	25.7143	17.9999	5420.49	0.0444741	0.15444	24.8571	18.0214	3865.16	1326.76	0.34326	4687	4392	2479	2547	3239	2276	1758	3062	3336	2758	6098	2985	4516	6432	6290	4444	3831.19
unknown201	0.0299489	0.115612	24	6	1290.29	0.0784423	0.589446	28	5.59e-05	4902.25	0.0165709	0.0891475	26	3.25003	3653.76	195.664	0.0535515	5945	3639	4446	5579	4501	4364	3828	4231	3798	4184	3249	1947	2210	2185	2049	2356	3656.94
unknown2019	0.0299489	0.115612	24	3	2331.15	0.107053	0.589446	28	6.63e-05	11828	0.021618	0.101434	26	1.62503	8832.38	703.482	0.079648	12319	10554	11646	12793	6751	11789	8005	9156	9000	7793	7840	5575	6525	7985	7299	6075	8819.06
unknown2066	0.0299489	0.115612	24	3	700.036	0.163641	0.616258	28	7.71e-05	3529	0.0309654	0.124423	26	1.62504	2779.52	132.886	0.0478092	3543	3059	3657	3857	3007	3640	2705	2655	2992	3144	2265	1467	1734	2341	2484	1882	2777
unknown2074	0.0299489	0.115612	24	6	937.624	0.229999	0.700313	26.6465	5.1e-05	2028	0.0411774	0.146663	25.3233	3.16543	1109.91	948.364	0.854449	3907	1344	1414	1447	2794	498	3314	934	930	676	109	32	103	195	41	133	1116.94
unknown2127	0.0299489	0.115612	24	6	4744.69	0.887804	1	25.7143	6	8787.5	0.123033	0.313061	24.8571	6.00714	5061.1	3202.03	0.632675	8742	1956	4504	10750	21923	1028	3097	9102	1140	14476	1454	1444	708	570	710	838	5152.62
unknown2133	0.0299489	0.115612	24	0	2349.36	0.174831	0.624779	26.9725	6.63e-05	12222.2	0.0327365	0.128038	25.4862	3.13e-05	7974.09	3230.75	0.405156	15386	10531	9781	13191	8264	8926	3276	5096	6874	7929	5173	2401	5656	8154	7002	7837	7842.31
unknown2155	0.0299489	0.115612	24	21	614.122	0.271824	0.756391	23.9024	17.9999	3405	0.0473053	0.160424	23.9512	19.497	2888.33	708.218	0.2452	4159	3346	2937	2821	2477	2523	2233	2080	2911	2345	2832	1953	2920	4380	3741	2579	2889.81
unknown2192	0.0299489	0.115612	24	6	1342.27	0.0801095	0.589446	26.8085	6.00001	4665.75	0.0168726	0.0896981	25.4043	6.01839	3188.52	1456.56	0.456814	2745	3159	4614	4717	2316	4579	5376	6392	3552	3478	3337	3274	1003	1119	1111	1347	3257.44
unknown247	0.0299489	0.115612	24	6	1676.37	0.241082	0.713924	28	6.63e-05	5918	0.0428219	0.150334	26	3.25003	4435.91	527.999	0.119028	4472	3716	6904	8580	3169	7477	5320	5878	4813	5021	4526	2834	1663	2121	2028	2590	4444.5
unknown251	0.0299489	0.115612	18	3	1128.19	0.140455	0.596796	28	6.63e-05	7698.25	0.0272207	0.116065	23	1.91669	9725.25	8203.58	0.843534	5923	5310	7601	11959	7907	7528	4929	8040	7947	4244	5969	5161	15193	21941	14825	23305	9861.38
unknown264	0.0299489	0.115612	18	3	642.76	0.315089	0.811268	24.0327	6.63e-05	5738.99	0.0534409	0.175616	21.0163	1.75139	4776.13	1715.18	0.359115	8241	4356	4737	5622	3520	3279	4081	5241	4218	3088	4759	2464	4894	7768	7100	5177	4909.06
unknown287	0.0299489	0.115612	24	6	19304	0.286239	0.774122	27.3065	5.99998	46067.2	0.049371	0.165818	25.6533	6.02501	30767.2	10505	0.341434	55775	22894	52132	38113	79790	25089	41225	38165	17147	50908	27670	8930	10839	12519	11390	9092	31354.9
unknown321	0.0299489	0.115612	24	6	2539.22	0.484737	1	28	6.63e-05	7040.25	0.0759608	0.221301	26	3.25003	4978.23	1584.62	0.31831	12990	4582	5972	4617	9669	4338	6494	6307	2695	8491	4555	1007	1377	2596	3447	927	5004
unknown325	0.0299489	0.115612	24	6	884.591	0.160333	0.61212	28	6.63e-05	2280	0.0304376	0.123836	26	3.25003	1451.01	295.482	0.203639	2670	3297	1777	1376	962	1481	2966	2307	1708	1328	1257	399	408	532	462	363	1455.81
unknown330	0.0299489	0.115612	24	6	10765.3	0.144502	0.598377	28	5.99997	23266.2	0.0278821	0.118087	26	6.0357	16026.1	4705.57	0.29362	30034	12870	26606	22709	36071	14600	21946	20448	10200	24340	15599	5272	4906	5570	6222	4147	16346.2
unknown339	0.0299489	0.115612	24	6	4883.99	0.0854362	0.589446	28	6.63e-05	12097.7	0.0178298	0.0924963	26	3.25003	8212.14	2189.44	0.26661	15352	6804	14211	12024	14033	8941	9744	11286	6037	10894	8295	2387	2299	3573	3677	2407	8247.75
unknown344	0.0299489	0.115612	24	6	3503.36	0.22689	0.700004	28	6.44e-05	9028.99	0.0407132	0.146055	26	3.25003	5425.98	152.521	0.0281094	15151	5925	7243	7797	6431	5736	9812	5227	3705	9324	4634	1588	815	1115	1525	748	5423.5
unknown35	0.0299489	0.115612	24	6	56285.3	0.0502899	0.589446	28	5.03e-05	218698	0.0112933	0.0711502	26	3.25002	178561	14525.2	0.0813461	200732	172574	257847	243638	188857	243260	220513	214002	205046	189132	177505	213465	83354	73797	74650	102386	178797
unknown356	0.0299489	0.115612	24	6	3552.86	0.0423154	0.589446	28	6.63e-05	11543	0.00972129	0.0655365	26	3.25003	8281.14	567.616	0.0685431	10250	9497	12080	14345	9483	11645	10453	12808	8738	10252	9890	11186	725	471	395	428	8290.38
unknown388	0.0299489	0.115612	24	21	3293.88	0.127371	0.589446	25.2722	17.9999	17251.7	0.0250579	0.111187	24.6361	19.5517	13523.1	3377.78	0.24978	18353	11099	12016	14817	11797	12794	8992	10048	12429	11500	12472	9622	14766	19171	18431	16639	13434.1
unknown397	0.0299489	0.115612	24	6	1683.62	0.29222	0.781213	28	6.09e-05	5534	0.0502216	0.167866	26	3.25003	4240.39	1228.52	0.289718	4306	4604	6913	6313	8601	3306	4864	4823	3208	5746	3309	2006	2142	2472	2689	2864	4260.38
unknown40	0.0299489	0.115612	24	3	1831.23	0.101912	0.589446	28	6.63e-05	5904.99	0.02073	0.0999265	26	1.62503	3363.14	144.663	0.0430143	8457	5849	4005	5309	2560	4147	3573	4288	3034	2970	3508	982	984	1529	1712	947	3365.88
unknown455	0.0299489	0.115612	24	3	4768.02	0.104538	0.589446	28	6.63e-05	11431	0.0211844	0.10107	26	1.62503	6040.84	110.583	0.0183059	12168	12530	7726	13300	3570	12032	5783	6454	8815	3773	3393	1012	1241	1689	2009	1125	6038.75
unknown499	0.0299489	0.115612	24	3	2717.76	0.0471443	0.589446	28	6.63e-05	8241.48	0.0106781	0.0690372	26	1.62503	4772.23	30.756	0.00644478	9629	8283	6076	8978	4289	6194	4278	5870	4542	3943	4359	1882	1469	2199	2314	2060	4772.81
unknown568	0.0299489	0.115612	24	6	1576.85	0.18669	0.639825	28	6.63e-05	4079.75	0.0345901	0.131348	26	3.25003	2704.94	568.387	0.210129	6448	2471	3814	3586	4540	2215	3365	3974	1705	3937	2313	786	896	1216	1485	676	2714.19
unknown603	0.0299489	0.115612	24	9	13815.8	0.0737902	0.589446	27.3065	5.99999	37147.2	0.0157232	0.0857101	25.6533	7.62834	25595.9	13921.5	0.543894	16459	28596	41881	35911	28180	42885	36348	41176	34834	30280	26724	46120	5842	3029	3068	3970	26581.4
unknown650	0.0299489	0.115612	24	3	4388.84	0.105495	0.589446	28	5.01e-05	16705.5	0.0213496	0.101434	26	1.62502	11961.4	307.317	0.0256924	18854	16279	14427	17262	9556	15114	12539	14674	14510	11928	8720	5916	7433	9628	8322	6127	11955.6
unknown7	0.0299489	0.115612	24	6	2272.64	0.0453074	0.589446	28	6.63e-05	4818	0.010316	0.0679417	26	3.25003	2955.51	810.505	0.274236	6200	3120	4677	5275	4743	2707	4344	4261	2256	3706	1601	782	942	901	953	1031	2968.69
unknown732	0.0299489	0.115612	24	3	2194.51	0.168361	0.617472	28	6.63e-05	9667.73	0.0317152	0.125621	26	1.62503	5608.85	2223.59	0.396443	14825	6771	6776	10299	6688	7415	3220	3798	4503	4161	3018	1467	3034	5352	3875	3866	5566.75
unknown735	0.0299489	0.115612	24	3	1008.33	0.461006	0.98144	27.1385	8.07e-05	4737.74	0.0729351	0.215182	25.5692	1.59811	2867.81	1496.54	0.52184	8786	2919	3323	3923	5223	1949	2168	2494	1866	2591	1259	477	1035	2609	2641	2203	2841.62
unknown745	0.0299489	0.115612	24	21	1016.11	0.143014	0.597406	26.3284	17.9999	4881.24	0.0276393	0.117236	25.1642	19.6113	3290.59	1140.84	0.346698	4367	3247	1889	2479	2562	2725	1261	1922	2966	2678	4338	1835	3881	5142	6033	4469	3237.12
unknown764	0.0299489	0.115612	24	18	1272.44	0.302912	0.796822	26.0177	18	4827.99	0.0517332	0.171958	25.0088	18.0293	3278.44	1154.55	0.352164	3945	3340	1521	1764	3187	1843	1127	1701	2744	2703	6406	2314	4018	5162	6099	4033	3244.19
unknown834	0.0299489	0.115612	24	9	16549.1	0.197026	0.657773	25.8651	12	50414.5	0.0361872	0.136116	24.9326	10.4585	38126.8	18040.8	0.473179	18823	33791	53061	45587	37452	51327	48363	63506	49795	38349	41232	72282	17110	12209	12581	26069	38846.1
unknown853	0.0299489	0.115612	24	3	7371.41	0.132577	0.592036	28	5.11e-05	35015.2	0.0259231	0.113226	26	1.62502	25557.5	3593.17	0.140592	38807	28959	28210	44085	28276	32254	21874	26541	25262	23346	23204	11219	16753	21568	21322	16151	25489.4
unknown950	0.0299489	0.115612	24	3	3375.37	0.0948151	0.589446	28	4.54e-05	8877.74	0.0194913	0.0963005	26	1.62502	4638.41	747.795	0.161218	14493	6716	6264	8038	5462	7081	4712	5041	5769	3162	1918	726	1016	1620	1257	713	4624.25
unknown966	0.0299489	0.115612	24	3	5709.53	0.123268	0.589446	28	6.63e-05	19251.2	0.0243716	0.10945	26	1.62503	10577	550.193	0.0520181	27110	14926	14987	19982	10032	13081	8883	10904	10288	13144	6919	2182	2464	5670	5000	3826	10587.4
unknown984	0.0299489	0.115612	24	3	4387.6	0.106913	0.589446	28	6.63e-05	12745.2	0.0215939	0.101434	26	1.62503	6728.99	7.18893	0.00106835	18162	10396	8179	14244	6907	8869	5771	7669	9227	4762	4027	1269	1492	2636	2634	1422	6729.12
unknown1830	0.0359573	0.13812	18	3	248.194	0.70414	1	25.5652	6.63e-05	4869.25	0.118397	0.30512	21.7826	1.81525	4676.97	1128.77	0.241347	6255	4235	4763	4224	3801	4532	3803	4330	3437	4080	6192	2487	5019	7465	6573	4532	4733
1-Methylguanosine	0.0419656	0.13812	24	6	1890.1	0.0583521	0.589446	28	5.88e-05	6873.24	0.0171713	0.0905954	26	3.25003	4758.16	159.846	0.0335941	8367	6434	5648	7044	6004	5842	3619	5704	4734	3786	4541	2634	3101	3240	3110	2281	4755.56
10-Hydroxydecanoic acid	0.0419656	0.13812	24	3	10968.8	0.233846	0.704279	26.9725	6.63e-05	79672.1	0.0551909	0.179322	25.4862	1.59292	60507.5	14195	0.234599	85961	73398	61674	97656	44088	56630	60310	72096	46521	53193	63482	28591	52352	65705	53370	49218	60265.3
3-[5-(2-Methylpropyl)-3,6-dioxopiperazin-2-yl]propanoic acid	0.0419656	0.13812	24	3	8244.16	0.0928235	0.589446	28	4.59e-05	18856.7	0.0255069	0.112287	26	1.62502	11157	823.043	0.0737691	24463	17100	14503	19361	11826	16243	13820	13745	19406	6853	4404	2052	3551	4322	4418	2196	11141.4
5-Hydroxytryptophan	0.0419656	0.13812	24	6	392.444	0.140266	0.596796	28	6.63e-05	1461.25	0.0361134	0.136022	26	3.25003	943.091	101.655	0.107789	1894	965	1147	1839	857	1064	1033	1238	1153	700	795	449	343	669	607	310	941.438
Ala-Ala	0.0419656	0.13812	18	3	234.406	0.0473049	0.589446	28	6.63e-05	6564.5	0.014337	0.0819973	23	1.91669	10266	9855.83	0.960043	7722	8174	5135	5227	7676	7095	4089	5887	6763	4547	5796	7345	24222	20198	23782	23215	10429.6
Asn-Arg	0.0419656	0.13812	24	21	14231.2	0.207315	0.674377	25.1282	17.9999	72844.9	0.049977	0.16745	24.5641	19.5447	55918.6	15030.8	0.268797	77221	61885	43002	48864	46430	42056	36080	46258	44260	53419	66291	31915	74984	71360	85030	60006	55566.3
Asn-Met	0.0419656	0.13812	24	21	787.894	0.284388	0.772109	24.0327	17.9999	2760.74	0.0647844	0.199134	24.0163	19.501	2159.74	787.985	0.364852	3577	3049	1551	2277	2038	1512	970	1779	2041	1819	1952	939	2323	3034	3507	2179	2159.19
Erythronolactone	0.0419656	0.13812	24	0	4112.71	0.284207	0.772109	24.1644	6.63e-05	14404.7	0.0647507	0.199134	24.0822	3.3e-05	10698.4	4844.95	0.452869	19937	12359	9593	15730	8361	12966	5769	6556	10733	6442	7096	5052	8250	15899	15041	11183	10685.4
Gln-Phe	0.0419656	0.13812	18	0	744.937	0.361156	0.861495	25.7143	17.9999	1905	0.0786504	0.227171	21.8571	18.5785	1751.42	760.63	0.434293	4242	2768	1361	2811	1678	1400	949	1073	1220	1508	1965	552	1436	2229	2174	1781	1821.69
Glu-Lys	0.0419656	0.13812	24	3	4055.96	0.215655	0.68516	28	5e-05	19315.7	0.0516307	0.171958	26	1.62502	15052.6	2174.77	0.144478	21899	16019	16950	22395	12352	19997	14581	18321	15540	14335	12190	8281	10254	16192	11444	9433	15011.4
Glycine	0.0419656	0.13812	24	0	329.689	0.297069	0.786164	27.6489	6.63e-05	1807	0.0671293	0.20311	25.8245	3.1e-05	1203.74	412.336	0.342545	2491	1485	1536	1716	992	1203	763	995	1578	695	904	422	951	1220	1251	742	1184
His-Ala	0.0419656	0.13812	24	0	227.158	0.281208	0.768709	24.7059	6.63e-05	1051.75	0.0641927	0.198322	24.3529	3.27e-05	767.078	310.821	0.405201	1226	1429	831	721	1023	563	425	642	743	442	505	399	907	684	954	724	763.625
Ile-Thr	0.0419656	0.13812	24	3	3773.3	0.35243	0.853108	28	6.63e-05	13062.2	0.0771119	0.223025	26	1.62503	7808.74	221.502	0.028366	18198	16018	8042	9991	6545	8691	5985	10950	13475	5456	3751	2378	4714	3369	4701	2743	7812.94
Isoleucine	0.0419656	0.13812	24	3	157798	0.108679	0.589446	28	8.01e-05	630674	0.0291445	0.121523	26	1.62504	455820	10586.1	0.0232243	709550	591511	555769	665869	406844	555331	530463	565943	609185	395475	374336	190446	239938	360156	332390	206703	455619
Malonic acid	0.0419656	0.13812	24	3	300.52	0.17868	0.630663	28	6.63e-05	1387	0.0441886	0.154356	26	1.62503	857.55	141.293	0.164764	2021	1399	1001	1127	1065	984	574	616	800	786	556	367	634	682	589	477	854.875
Met-Gln	0.0419656	0.13812	24	21	892.722	0.254964	0.729532	24.9858	17.9999	4013.24	0.05925	0.188285	24.4929	19.5381	3095.33	894.869	0.289103	4356	3793	2478	2725	3155	2712	1633	2312	3019	2153	3165	1677	3612	4062	4773	3606	3076.94
Octopine	0.0419656	0.13812	24	0	1728.52	0.186621	0.639825	24.1644	17.9999	7541.99	0.045812	0.157659	24.0822	21.0105	6676.28	1602.3	0.239999	8668	9099	7125	7336	5442	5970	4615	5463	7628	4598	6164	4447	6078	9138	8278	6674	6670.19
Phe-Ser	0.0419656	0.13812	24	3	1692.64	0.395462	0.905282	28	6.63e-05	8431.74	0.0846155	0.237827	26	1.62503	6350.5	693.049	0.109133	9246	9922	5988	8571	5063	8471	7109	5595	8400	3707	5605	3697	4494	6183	5499	3848	6337.38
Picolinic acid	0.0419656	0.13812	24	21	7986.06	0.600126	1	23.9024	6.63e-05	55173.4	0.117902	0.30469	23.9512	22.4543	45690.2	13238.4	0.289742	87931	41184	40373	51206	40803	39576	34252	39034	44025	34598	40493	22469	46267	72656	55036	41583	45717.9
Pro-Trp	0.0419656	0.13812	24	3	6638.67	0.125269	0.589446	28	5.67e-05	20045	0.0328466	0.128038	26	1.62503	12999.7	43.4362	0.00334132	24795	19646	16383	19356	10729	15791	13841	17685	19122	11249	8866	3673	6597	6917	7941	5418	13000.6
Ser-Glu	0.0419656	0.13812	24	18	4941.97	0.238586	0.71182	25.2722	17.9999	29527.5	0.0561088	0.181045	24.6361	18.012	23520.3	5201.62	0.221154	30333	19274	17726	21405	23605	19079	13163	16831	21888	22932	31775	18585	27125	31131	30520	29334	23419.1
Tagatose	0.0419656	0.13812	24	0	25774	0.418467	0.937099	25.7143	6.63e-05	363160	0.0885447	0.246144	24.8571	3.21e-05	307012	53274.7	0.173527	397699	335228	302318	417395	301931	323874	211340	291923	295724	287054	303379	187648	276923	328393	309872	319800	305656
Tyrosine	0.0419656	0.13812	24	3	28249.1	0.155504	0.604555	28	6.63e-05	137446	0.0393637	0.143052	26	1.62503	94782.6	5284.34	0.0557523	180152	126958	100471	142202	95104	117002	78065	96345	106400	85257	79647	43941	56151	73870	72369	60986	94682.5
gamma-Glutamylglutamine	0.0419656	0.13812	24	18	1033.44	0.0519364	0.589446	28	17.9999	6620.23	0.0155372	0.0849298	26	18.1071	3622.69	1817.73	0.501762	3172	1805	3017	2416	2419	2648	1941	1966	1939	3080	2935	2598	5082	6883	8147	6369	3526.06
unknown1012	0.0419656	0.13812	24	3	1177.33	0.158606	0.609738	28	6.63e-05	5153.75	0.0400174	0.144862	26	1.62503	4138.53	391.28	0.0945456	5183	5097	5160	5175	3843	5115	3710	4909	5022	3555	4527	2878	3166	3150	2985	2860	4145.94
unknown1032	0.0419656	0.13812	18	3	593.97	0.350372	0.852767	24.0327	6.63e-05	5925.99	0.0767477	0.222433	21.0163	1.75139	4703.26	1974.77	0.419872	8798	3477	3976	7453	3153	3633	2940	5352	2937	4137	3111	3372	5037	7688	7636	5001	4856.31
unknown1042	0.0419656	0.13812	24	3	988.712	0.246646	0.716295	28	6.63e-05	5453.24	0.0576604	0.184499	26	1.62503	4045.73	123.016	0.0304064	6069	5072	4625	6047	3953	4355	3462	4484	5073	4200	3253	2138	2394	3441	3646	2557	4048.06
unknown1065	0.0419656	0.13812	24	6	1315.22	0.281207	0.768709	28	6.63e-05	3463	0.0641925	0.198322	26	3.25003	2393.34	620.745	0.259363	5183	1709	3449	3511	5252	2026	2595	2805	1594	3173	2602	730	774	1193	1260	599	2403.44
unknown1092	0.0419656	0.13812	24	3	1038.03	0.0695048	0.589446	28	6.63e-05	5078.49	0.019943	0.0974797	26	1.62503	3750.17	60.5922	0.0161572	5556	5197	4230	5331	3886	4678	3219	3868	4083	3349	3455	2534	2517	2774	2683	2661	3751.31
unknown1120	0.0419656	0.13812	24	18	8720.57	0.108803	0.589446	28	17.9999	22331.2	0.0291726	0.121523	26	18.1071	12076.3	6423.68	0.531925	11609	8205	3929	3829	9833	4937	2433	4098	7744	7646	26226	7943	17245	23243	28050	20787	11734.8
unknown113	0.0419656	0.13812	24	3	1692.99	0.132327	0.592036	28	6.63e-05	7426.74	0.0343929	0.131135	26	1.62503	5281.82	52.4367	0.00992778	8800	6525	6334	8048	5122	6579	4744	5586	6349	5077	4552	2520	3222	3934	4132	3001	5282.81
unknown1197	0.0419656	0.13812	24	3	769.332	0.187599	0.639825	28	6.63e-05	4322.49	0.0460109	0.157964	26	1.62503	3305.91	1.64091	0.000496358	4567	4367	3665	4691	3388	3869	2629	3569	3546	3524	2926	1943	2038	3125	2833	2214	3305.88
unknown1218	0.0419656	0.13812	18	15	1486.87	0.999135	1	20	12	5474.75	0.174919	0.399934	19	13.6167	4414.11	1934.89	0.438342	5698	6830	5767	3616	3294	3241	1950	3681	9562	4468	4227	3642	4178	3869	3004	3299	4395.38
unknown1265	0.0419656	0.13812	24	3	1507.55	0.184383	0.638405	28	6.63e-05	5323.98	0.0453559	0.156669	26	1.62503	2717.92	93.1094	0.0342575	8127	5165	2980	5024	3030	2566	1862	2708	3331	2439	1759	324	806	975	1632	787	2719.69
unknown1315	0.0419656	0.13812	24	3	1796.4	0.333531	0.832625	28	7.61e-05	5571.99	0.0737481	0.216436	26	1.62504	3624.96	426.836	0.117749	8061	4668	3715	5844	4275	6163	3217	3046	5824	3096	1538	643	1916	2455	2205	1204	3616.88
unknown1326	0.0419656	0.13812	24	3	4657.01	0.0830444	0.589446	28	7.87e-05	12790	0.0232076	0.106662	26	1.62504	7900.24	221.834	0.0280794	13491	12406	10972	14291	6300	12421	8813	8673	11584	6122	5221	2711	3117	4002	3911	2436	7904.44
unknown1401	0.0419656	0.13812	24	6	3053.99	0.0619802	0.589446	28	7.86e-05	8316.48	0.018082	0.092869	26	3.25004	5156.96	366.164	0.0710039	9445	7877	7100	8844	4452	8030	5588	5813	7035	4059	3450	1968	1960	2742	2460	1593	5151
unknown1445	0.0419656	0.13812	24	3	2151.73	0.219488	0.689854	28	6.63e-05	8174.73	0.0523859	0.173234	26	1.62503	4881.52	921.973	0.18887	7088	5011	9115	11485	1908	6999	5509	4671	5356	3993	2454	1860	1980	4009	3572	2815	4864.06
unknown1455	0.0419656	0.13812	24	3	1515.86	0.230297	0.700313	28	6.63e-05	5506.74	0.0545013	0.177702	26	1.62503	3346.34	113.426	0.0338955	8434	5093	4040	4460	2667	3658	3434	4207	4794	2620	2193	829	1593	1930	2113	1442	3344.19
unknown1463	0.0419656	0.13812	24	3	19486.1	0.448306	0.967688	28	6.63e-05	63865.5	0.0935626	0.255512	26	1.62503	27299.3	1932.62	0.0707937	123939	64244	20853	46427	19801	31907	13174	30539	50578	11591	4826	1317	3581	4684	6847	3066	27335.9
unknown1515	0.0419656	0.13812	24	3	2678.17	0.187752	0.639825	28	6.1e-05	7350.24	0.046042	0.157964	26	1.62503	5000.31	425.547	0.0851042	7794	5954	6242	9411	4308	8757	5429	5699	7779	3810	2798	1585	2074	3689	2385	2162	4992.25
unknown1539	0.0419656	0.13812	24	0	1475.38	0.179454	0.630663	24.9858	6.63e-05	5607.99	0.0443474	0.15444	24.4929	3.25e-05	3874.78	1892.79	0.488489	7101	3641	5003	6687	1490	4136	3650	2864	3040	3893	1951	1140	3647	5323	3983	3985	3845.88
unknown1555	0.0419656	0.13812	24	3	1888.15	0.0570858	0.589446	28	5.41e-05	6987.24	0.0168512	0.0896981	26	1.62503	4433	983.662	0.221895	8788	6248	5436	7477	2919	5708	5000	5421	4115	3374	3034	2031	2926	2955	3302	1896	4414.38
unknown1576	0.0419656	0.13812	24	3	7148.85	0.183337	0.637226	28	6.63e-05	24470.4	0.0451423	0.156124	26	1.62503	12468.7	4030.18	0.323224	25164	9433	27624	35661	3307	17044	16690	10219	8932	11487	4185	2669	4606	9139	6013	6105	12392.4
unknown1579	0.0419656	0.13812	24	21	868.504	0.19504	0.655061	25.2722	17.9999	4127.74	0.0475174	0.160753	24.6361	19.5517	3184.61	849.255	0.266675	4313	2623	2490	3879	2477	2107	2966	2674	2886	2541	3302	1827	4133	4410	3474	4494	3162.25
unknown1586	0.0419656	0.13812	24	6	17260.1	0.0499248	0.589446	28	6.63e-05	46644.7	0.0150182	0.0832544	26	3.25003	26965.4	4912.8	0.182189	58894	50953	36843	39889	30834	30587	29389	34656	26236	32610	20996	11955	6198	8663	6157	5308	26885.5
unknown164	0.0419656	0.13812	24	6	54356.5	0.0833233	0.589446	28	6.63e-05	171436	0.0232739	0.106662	26	3.25003	135710	13157.2	0.0969512	128699	125609	190987	240449	141851	183573	181718	175689	153584	138346	147606	174263	51766	41965	42040	56635	135924
unknown1653	0.0419656	0.13812	24	21	1938.53	0.238358	0.71182	27.4766	17.9999	23782.6	0.0560648	0.181045	25.7383	19.6911	8503.87	10013.6	1.17754	3172	13273	713	2231	477	679	661	1762	1817	808	2349	2115	447	26825	34822	33037	7824.25
unknown1663	0.0419656	0.13812	24	3	564.271	0.412356	0.929224	28	6.63e-05	3841	0.0875062	0.244474	26	1.62503	3112.41	272.413	0.0875249	3864	4005	3880	3615	2828	3679	3119	3085	3841	2567	2871	1717	1778	3424	2998	2445	3107.25
unknown1771	0.0419656	0.13812	24	21	574.878	0.226665	0.700004	25.1282	17.9999	2727.74	0.0537928	0.176009	24.5641	19.5447	2111.6	561.712	0.266012	2928	1745	1627	2512	1705	1494	1832	1552	1861	1767	2510	1131	2665	2925	2371	2950	2098.44
unknown1836	0.0419656	0.13812	24	0	377.949	0.348982	0.85259	25.1282	6.63e-05	2529.25	0.0765014	0.222042	24.5641	3.24e-05	2017.36	540.002	0.267678	3444	1912	2199	2562	1978	2201	1417	1318	1705	1673	1859	1372	1887	2454	2202	1945	2008
unknown1842	0.0419656	0.13812	24	3	3679.78	0.155163	0.604555	28	6.63e-05	10582.5	0.0392917	0.143017	26	1.62503	5577.1	35.0781	0.00628967	16380	9809	5854	10287	3390	8637	5249	7157	6963	3466	4509	928	1487	2206	1789	1112	5576.44
unknown1861	0.0419656	0.13812	24	6	2603.92	0.426415	0.945019	28	6.63e-05	8839.73	0.0898899	0.248153	26	3.25003	5417.34	2107.81	0.389085	13908	10102	5176	6173	6329	6356	3381	6662	8947	5554	4748	2644	1496	1587	1838	1228	5383.06
unknown1901	0.0419656	0.13812	24	6	2141.12	0.259519	0.733979	28	6.63e-05	5738	0.0601157	0.1898	26	3.25003	3641.7	744.843	0.204532	7381	2994	7257	5320	9189	2991	3736	3551	2515	5427	3053	911	900	1406	1131	699	3653.81
unknown1910	0.0419656	0.13812	24	3	1939.06	0.216278	0.685168	28	6.63e-05	6999.48	0.0517536	0.171958	26	1.62503	3451.05	692.475	0.200656	8421	3193	5554	10830	908	4966	3804	3138	2481	3780	1068	776	1251	2205	1280	1352	3437.94
unknown1927	0.0419656	0.13812	24	18	981.464	0.497871	1	24.5682	17.9999	5271.75	0.101716	0.273483	24.2841	18.0024	4099.71	882.821	0.215337	4901	2984	3634	3074	2758	3369	2678	3097	3041	4131	7522	3192	4250	6280	6063	4494	4091.75
unknown1930	0.0419656	0.13812	24	6	1545.38	0.232058	0.70323	28	6.63e-05	7079.99	0.0548438	0.17861	26	3.25003	4509.77	681.172	0.151044	9768	9664	3880	5008	5356	3883	5014	5123	4057	4061	4344	1680	2123	3160	2794	2064	4498.69
unknown1941	0.0419656	0.13812	24	6	2773.8	0.165083	0.616258	28	6.63e-05	12028.2	0.0413743	0.146916	26	3.25003	9619.31	1629.25	0.169373	15789	12182	7880	12262	10037	12541	10835	11931	8911	9179	10348	5120	7007	8266	6871	5174	9645.81
unknown1962	0.0419656	0.13812	24	0	1363.83	0.416446	0.933574	26.1721	6.63e-05	11462.7	0.0882017	0.24568	25.0861	3.18e-05	8196.41	2877.51	0.35107	16198	8564	6876	14213	6658	9415	5400	7379	7621	6418	6613	2976	6813	9568	8292	6695	8106.19
unknown2047	0.0419656	0.13812	24	3	2246.48	0.220836	0.693248	28	6.63e-05	7982.23	0.0526511	0.173549	26	1.62503	4791.34	622.095	0.129837	13040	5914	5339	7636	5575	4844	4235	6259	3079	3137	6416	1236	2165	2183	3249	2166	4779.56
unknown2190	0.0419656	0.13812	24	21	1225.24	0.242224	0.714639	25.8651	17.9999	4727.49	0.0568106	0.182479	24.9326	19.5835	3115.57	1297.78	0.416545	3124	4480	1337	3333	3437	1611	1190	1706	2535	1625	3905	1867	5769	5237	4659	3245	3066.25
unknown23	0.0419656	0.13812	24	9	123667	0.0736264	0.589446	28	6.00001	346994	0.0209476	0.100455	26	7.66072	243600	124711	0.51195	192854	307403	383153	366962	237134	408611	388884	353349	376262	297342	237755	394638	49513	25163	22001	27261	254268
unknown246	0.0419656	0.13812	24	3	8220.82	0.0971759	0.589446	28	6.63e-05	25716	0.026516	0.114307	26	1.62503	15679.4	110.313	0.00703557	32070	25398	19514	25882	13601	20605	14755	20370	21707	12382	11287	4191	5640	9142	9518	4775	15677.3
unknown271	0.0419656	0.13812	24	18	1521.34	0.141083	0.596796	28	17.9999	6655.99	0.0362895	0.136134	26	18.1071	4276.41	1343.34	0.314128	3805	3711	2492	2567	4577	2787	1692	2863	3492	4642	5557	2471	5570	6730	8965	5359	4205
unknown281	0.0419656	0.13812	24	3	10553.9	0.0932064	0.589446	28	6.63e-05	38913.9	0.025596	0.112501	26	1.62503	24876.6	2154.04	0.0865889	48974	36604	27889	42189	19833	30941	24336	30181	25322	21372	21662	9103	12980	20403	15888	9696	24835.8
unknown307	0.0419656	0.13812	24	6	55735.2	0.0659973	0.589446	28	6.04e-05	102308	0.01908	0.0952144	26	3.25003	56385.4	9650.02	0.171144	103401	114986	87746	103099	63591	85823	53940	110915	105911	34184	10212	16215	5990	2448	2758	3459	56542.4
unknown367	0.0419656	0.13812	24	18	1718.27	0.318539	0.814466	28	18	7681.74	0.0710481	0.210505	26	18.1071	5532.95	1006.67	0.181941	5072	6202	2457	2885	6859	4003	1928	4284	6439	4005	8197	4613	8626	7177	8348	6576	5479.44
unknown371	0.0419656	0.13812	24	3	100105	0.0916725	0.589446	28	4.71e-05	380837	0.0252386	0.111485	26	1.62502	273572	8323.83	0.0304265	434674	358081	332268	398327	255047	328899	327327	341699	364151	244077	210382	115464	136201	206967	199505	121562	273414
unknown396	0.0419656	0.13812	24	3	985.707	0.166485	0.616258	28	5.66e-05	4384.75	0.0416666	0.147018	26	1.62503	3267.31	207.998	0.0636603	5152	3935	3815	4637	2813	4168	3318	3827	4243	2777	2460	1724	2018	3016	2463	1848	3263.38
unknown494	0.0419656	0.13812	24	18	1363.66	0.304783	0.799435	28	17.9999	4593.25	0.0685446	0.205707	26	18.1071	3403.92	577.051	0.169525	4005	2295	2069	1750	4607	2222	1606	1814	2891	3431	5628	3281	4609	4346	4997	4421	3373.25
unknown50	0.0419656	0.13812	24	6	8541.14	0.0689338	0.589446	28	6.63e-05	26859.5	0.019803	0.0971358	26	3.25003	20194.5	1512.37	0.0748903	27937	20471	31243	27787	24522	28517	24179	22013	25564	25438	20744	11566	7407	8162	8829	9126	20219.1
unknown508	0.0419656	0.13812	24	3	1311.68	0.129569	0.592031	28	4.36e-05	4920.75	0.0337906	0.129903	26	1.62502	3722.78	14.6083	0.00392403	4887	4862	4643	5291	3390	4795	3656	4806	4825	3332	3370	1728	2332	2832	2939	1872	3722.5
unknown510	0.0419656	0.13812	24	3	2462.5	0.141512	0.596796	28	6.63e-05	11139.2	0.0363817	0.136297	26	1.62503	8189.72	24.5411	0.00299657	12602	10663	9267	12025	7663	10368	7479	9372	10273	7774	6574	4372	4556	6384	6741	4930	8190.19
unknown567	0.0419656	0.13812	24	3	3165.72	0.0941214	0.589446	28	6.63e-05	10597.2	0.0258087	0.112903	26	1.62503	7012.88	692.889	0.0988024	10673	11170	9755	10791	7222	10271	5762	8311	8803	6597	7257	2044	3028	4150	3911	2671	7026
unknown600	0.0419656	0.13812	18	15	9286.08	0.999456	1	20	12	32432.2	0.174962	0.399934	19	13.6167	25271.7	12405.4	0.49088	35137	36167	32398	24758	18987	16991	11751	21879	53972	29949	25859	19949	24378	18794	13067	18389	25151.6
unknown616	0.0419656	0.13812	24	3	10314.7	0.11092	0.589446	28	5.12e-05	40954.5	0.0296506	0.122447	26	1.62502	29799.4	1986.45	0.0666607	47268	32230	37892	46428	36415	37050	26751	30612	29885	35444	27144	15922	16271	21619	18830	17632	29837.1
unknown619	0.0419656	0.13812	24	3	1365.78	0.112624	0.589446	28	4.13e-05	4760.75	0.0300341	0.123091	26	1.62502	3361.7	128.195	0.0381339	5335	4903	3943	4862	3013	4351	3275	4207	4469	2955	2953	1484	1733	2369	2276	1698	3364.12
unknown622	0.0419656	0.13812	24	3	3526.16	0.0916482	0.589446	28	4.42e-05	10965.7	0.0252329	0.111485	26	1.62502	7509.95	152.75	0.0203396	12887	9513	10479	10984	7876	10775	8047	8352	10737	6020	6010	2342	4113	4618	4431	2929	7507.06
unknown660	0.0419656	0.13812	24	3	686.601	0.301303	0.794836	28	6.63e-05	4336.24	0.0679071	0.204454	26	1.62503	3277.91	107.6	0.0328257	4733	3495	3689	5428	2764	3052	3147	3853	2714	2668	4042	2180	2555	3007	2495	2592	3275.88
unknown668	0.0419656	0.13812	24	6	22487.4	0.117029	0.589446	28	7.23e-05	89864.9	0.0310202	0.124423	26	3.25003	69518.9	243.04	0.00349602	96837	78788	91525	92310	80272	98064	64248	67739	83514	78531	54731	46359	42731	37112	51978	47500	69514.9
unknown674	0.0419656	0.13812	24	9	4428.26	0.0486268	0.589446	27.4766	6.00002	13645.2	0.0146814	0.082529	25.7383	7.63615	9270.41	5367.96	0.579042	7576	8428	14610	14761	12123	15664	14320	12474	11608	11738	13572	14360	932	451	928	1173	9669.88
unknown737	0.0419656	0.13812	24	18	2932.37	0.10844	0.589446	28	17.9999	25757.7	0.0290905	0.121523	26	18.1071	21324.2	1745.68	0.0818636	15717	17912	21043	20254	18902	21381	17628	19773	20466	20000	19288	24308	27604	23818	25084	26525	21231.4
unknown74	0.0419656	0.13812	18	3	550.659	0.653224	1	26.8085	6.63e-05	3613.75	0.12601	0.318564	22.4043	1.86705	3674.21	1741.49	0.473977	4684	1879	3178	4714	3444	2696	3237	3896	2368	2780	3336	2198	4361	4081	5026	7773	3728.19
unknown746	0.0419656	0.13812	24	6	4366.03	0.0486777	0.589446	28	4.64e-05	15421.5	0.0146947	0.082529	26	3.25002	11113.7	321.345	0.0289143	15301	12598	15614	18173	10808	13447	12406	14366	13157	10041	8982	6421	6426	7701	6118	6344	11118.9
unknown776	0.0419656	0.13812	24	6	1580.74	0.118704	0.589446	28	6.63e-05	4115.5	0.0313936	0.124814	26	3.25003	2757.07	521.986	0.189326	5263	2169	5269	3761	4033	2125	4007	3732	1808	3284	2208	1131	1292	1560	1261	1346	2765.56
unknown78	0.0419656	0.13812	24	9	3996.57	0.0804431	0.589446	27.6489	6.00004	12391	0.0225881	0.105424	25.8245	7.64414	8869.45	4707.3	0.530732	7078	9009	14407	12909	10761	13933	12179	12691	11661	11387	9805	16700	1965	1107	1014	1186	9237
unknown792	0.0419656	0.13812	24	3	1887.27	0.308099	0.80069	28	6.63e-05	6650.49	0.0691504	0.206637	26	1.62503	4514.33	61.8982	0.0137115	7995	8014	4286	6307	3814	5569	4388	5620	7172	3692	2944	1621	2796	2957	3136	1937	4515.5
unknown793	0.0419656	0.13812	24	3	931.79	0.127279	0.589446	28	6.63e-05	4300.74	0.0332886	0.12888	26	1.62503	3206.97	123.704	0.0385733	4983	4072	3705	4443	2917	4355	2842	3378	3647	3179	2823	2013	2192	2526	2198	2076	3209.31
unknown816	0.0419656	0.13812	24	3	2985.58	0.342329	0.84254	28	6.63e-05	9754.23	0.0753195	0.219662	26	1.62503	6012.47	242.755	0.0403753	13648	11958	5798	7613	5518	7137	4923	8244	10243	4794	3025	1682	3297	2878	3443	2072	6017.06
unknown849	0.0419656	0.13812	18	3	73.5391	0.0540673	0.589446	28	17.9999	21148.6	0.0160834	0.0873323	23	9.3095	6729.94	6681.94	0.992868	3463	2747	1956	1799	2771	2833	1486	1659	2606	1653	2465	2608	18607	28115	20437	17436	7040.06
unknown870	0.0419656	0.13812	24	6	81511	0.0482737	0.589446	28	4.52e-05	181834	0.0145896	0.082529	26	3.25002	109805	4481.17	0.0408104	191956	154898	162508	217974	125591	202412	124958	132185	140291	133949	106034	42126	5731	6691	6350	4386	109878
unknown880	0.0419656	0.13812	24	6	1356.94	0.0664483	0.589446	28	5.82e-05	4409.5	0.0191914	0.0953082	26	3.25003	3179.68	227.427	0.0715251	4344	3834	4212	5248	3595	4480	3376	3546	4095	2957	2557	1502	1458	2210	2023	1497	3183.38
unknown978	0.0419656	0.13812	24	21	1257.59	0.169822	0.620162	26.1721	17.9999	5065.24	0.0423603	0.149089	25.0861	19.6016	3256.16	1386.03	0.425664	4681	1849	2033	3917	2488	1843	1845	2314	1660	2638	3448	2148	3307	5252	5327	6375	3195.31
unknown99	0.0419656	0.13812	24	9	10708.8	0.11414	0.589446	27.1385	12	41511.5	0.0303742	0.123758	25.5692	10.4473	33108	11899.1	0.359402	22762	36202	41274	44428	36637	45652	37965	43147	39897	34982	49293	41874	18620	12216	16817	20681	33902.9
Trp-Trp	0.0499351	0.163771	24	6	114.905	0.242826	0.714902	28	6.02e-05	413.249	0.0656287	0.200722	26	3.25003	241.599	29.1151	0.12051	706	383	297	267	314	152	201	396	158	242	159	68	116	138	152	109	241.125
unknown1546	0.0499351	0.163771	24	6	462.094	0.127439	0.589446	28	4.3e-05	1205	0.0385457	0.141368	26	3.25002	810.356	33.4019	0.0412188	970	1223	1320	1307	557	1048	1024	1187	1187	908	489	426	182	454	379	296	809.812

## Sheet: unique cycling perAS in perAM
CycID	JTK_pvalue	JTK_BH.Q	JTK_period	JTK_adjphase	JTK_amplitude	LS_pvalue	LS_BH.Q	LS_period	LS_adjphase	LS_amplitude	meta2d_pvalue	meta2d_BH.Q	meta2d_period	meta2d_phase	meta2d_Base	meta2d_AMP	meta2d_rAMP	0	0.1	0.2	0.3	6	6.1	6.2	6.3	12	12.1	12.2	12.3	18	18.1	18.2	18.3	PerM
(1S,4aS,7aS)-1-(.beta.-D-Glucopyranosyloxy)-7-((((2E)-3-phenylprop-2-enoyl)oxy)methyl)-1,4a,5,7a-tetrahydrocyclopenta[c]pyran-4-carboxylic acid	1	1	24	18	763.145	0.999979	1	28	6	7850	1	1	26	25.5357	8003.03	605.984	0.0757194	5543	7437	5999	9861	6140	5873	7352	12035	8366	6204	7202	9002	10494	5149	9658	11159	7967.12
(R)-Pantetheine	0.0579045	0.266686	24	3	1655.87	0.188433	1	28	6.63e-05	5427.23	0.0602073	0.39191	26	1.62503	2356.68	1309.83	0.555796	5348	3812	9552	2997	1974	2963	2325	539	437	667	1341	721	257	3341	610	426	2331.88
1-Methyladenosine	0.105571	0.365115	24	9	9689.31	0.692817	1	25.1282	6	70153	0.264432	0.849286	24.5641	7.53842	61806.5	7794.48	0.126111	82563	65824	53369	46160	67288	76609	53035	83680	68039	66780	53536	67071	52449	54588	49339	51587	61994.8
1-Methylguanosine	1	1	18	12	1054.65	0.969927	1	20	12	7529.75	0.999543	1	19	12.0333	6409.85	1199.7	0.187165	8371	6844	5426	4119	4685	7058	4409	6561	7225	10062	6425	6407	4801	6503	5216	6178	6268.12
1-Palmitoyl-sn-glycero-3-phosphocholine	0.0787266	0.310786	24	9	40342.7	0.361738	1	24.1644	6	187780	0.129822	0.5703	24.0822	7.50521	143105	42040.5	0.293773	197794	159313	112177	70101	176472	219253	135713	219680	158100	196041	111818	144450	96159	144428	60869	89682	143253
10-Hydroxydecanoic acid	0.0579045	0.266686	24	12	20126.7	0.41331	1	24.9858	12	98353	0.113261	0.525102	24.4929	12.0049	83390.2	22662.3	0.271763	74098	71489	61303	39073	84800	122908	72341	107817	108411	114409	91058	79534	63330	106614	57753	85210	83759.2
2'-O-Methyluridine	0.719948	1	18	9	735.391	0.926584	1	24.7059	5.99999	3669.75	0.937149	1	21.3529	7.93109	3262.5	621.553	0.190514	2427	2472	2297	2899	2393	3340	4117	4829	3334	3187	4259	3659	1772	1503	4901	3649	3189.88
2-Ethyl-L-glutamic acid	0.719948	1	24	9	1851.56	0.863287	1	23.6461	5.99999	17910	0.917108	1	23.8231	7.48926	14696.8	2714.06	0.18467	19792	16056	11399	10204	12251	19827	11968	27594	17357	15317	12337	14423	9948	12736	10951	12661	14676.3
3'-O-Methylguanosine	1	1	24	12	1052.53	0.987377	1	24.9858	12	6276.75	0.99992	1	24.4929	12.0049	5451.9	1238.23	0.227118	8659	5382	4211	2600	5529	6984	3569	7755	6504	7641	5306	5656	4234	5737	3594	4192	5472.06
3-Methylcytidine	0.873774	1	18	12	60.2809	0.999581	1	28	12	2282.5	0.991626	1	23	12.5952	2163.51	215.458	0.0995871	2896	2468	1907	1618	1928	2310	1887	2737	2527	2295	1994	2314	1565	2290	1955	1836	2157.94
3-Nitrotyrosine	1	1	18	9	94.7523	1	1	25.2722	12	1302	1	1	21.6361	10.5458	1242.96	53.2231	0.0428196	1642	1343	928	726	1187	1426	795	1574	1788	1517	794	1109	1126	1228	867	1753	1237.69
3-Phosphonopropionic acid	1	1	18	3	45.2548	0.961117	1	20.9501	6.63e-05	360.25	0.999234	1	19.4751	1.62295	322.888	36.179	0.112048	450	426	316	249	281	448	343	291	217	309	295	302	309	367	376	272	328.188
3-[5-(2-Methylpropyl)-3,6-dioxopiperazin-2-yl]propanoic acid	0.182589	0.483038	24	12	5329.29	0.352839	1	21.1511	12	24819	0.241093	0.805858	22.5755	12.048	16852.2	8949.07	0.531032	16083	11098	7974	7217	15510	14779	8203	29433	28800	34738	15303	20435	15656	15860	9687	12571	16459.2
3.alpha.-Galactobiose	1	1	18	0	16.7938	1	1	20	6	278	1	1	19	2.85	254.101	18.0779	0.0711445	314	341	174	202	160	228	224	500	259	180	203	300	210	220	280	299	255.875
4-Aminobenzoic acid	1	1	18	6	1407.14	0.999928	1	20	6.00001	29089.2	1	1	19	6.01667	26475.5	2973.23	0.112301	27400	22447	24644	21931	21050	35128	21822	38357	26251	23691	20851	29773	22199	31689	23799	26812	26115.2
4-Guanidinobutyric acid	1	1	18	6	350.548	0.980721	1	20	6.00002	2981.25	0.999813	1	19	6.01668	2680.35	391.261	0.145974	2744	2683	2067	1544	2634	3345	2313	3633	2668	2713	2204	3111	2373	2771	2505	2819	2632.94
4-Hydroxyhippuric acid	1	1	18	6	74.5998	1	1	20	6	869.75	1	1	19	6.01666	797.265	70.2708	0.0881398	1115	777	719	467	803	1091	593	992	1197	820	421	485	755	796	501	1088	788.75
4-Pyridoxic acid	0.139706	0.411743	24	12	724.077	0.567032	1	23.52	12	3523	0.280079	0.871462	23.76	12.0012	2569.59	1045.11	0.406722	2814	1468	1424	978	2192	2993	1404	4123	3459	5285	2393	2955	1807	3360	1655	2673	2561.44
4-Thiouridine	0.587657	0.97978	24	0	183.141	0.679645	1	27.4766	6.63e-05	1202	0.765965	1	25.7383	3.11e-05	871.533	226.866	0.260307	1326	603	1345	1534	701	665	1065	524	651	923	403	868	548	1089	672	860	861.062
5-Hydroxytryptophan	1	1	18	12	150.083	0.99725	1	23.9024	12	1257.5	0.999996	1	20.9512	12.2429	1135.97	172.093	0.151495	1466	1020	749	777	844	1145	895	1972	1250	1643	1119	1018	1041	1224	914	880	1122.31
5-O-Feruloylquinic acid	1	1	24	6	718.244	0.999967	1	28	6.63e-05	7296.25	1	1	26	3.25003	6687.7	147.087	0.0219937	8321	6821	7754	6289	4654	8819	5143	8916	6371	10158	4298	5898	4568	7282	4930	6743	6685.31
7-Methylguanosine	1	1	24	6	445.124	0.997527	1	28	12	4338.75	0.999997	1	26	8.82143	4160.44	201.05	0.0483241	6726	4747	3707	3487	4346	5164	3227	4416	5767	5264	3318	3006	3781	3792	3046	3063	4178.56
Acetyl-L-threonine	0.301037	0.636029	24	15	2938.74	0.670028	1	23.0287	12	13542.5	0.524622	1	23.5144	13.4748	9397.19	5414.19	0.57615	8595	5720	5014	3402	5466	10410	3879	18570	18150	17252	8068	10700	4742	10985	5968	12718	9352.44
Acetylcarnitine	0.0787266	0.310786	24	3	68878.9	0.123318	1	28	6.63e-05	289366	0.0547044	0.373017	26	1.62503	139294	33024.8	0.237087	360741	324825	258915	212987	57887	130006	97057	78292	107347	128894	31881	50781	92723	201851	19764	64750	138669
Ala-Ala	0.380147	0.737824	18	0	5932.45	0.201461	1	28	6.63e-05	22410.2	0.273359	0.864036	23	2.72e-05	15634.5	2349.34	0.150267	23398	21649	24469	20125	12955	19268	11893	11186	13255	16903	12962	11859	10047	17302	11408	12831	15719.4
Ala-Ala-Lys	1	1	18	0	535.987	0.999894	1	28	6.63e-05	4257.5	1	1	23	2.72e-05	3818.82	139.895	0.036633	4478	4572	4278	3702	3176	5520	3077	3509	4191	3515	3475	3358	2875	5656	3327	2473	3823.88
Ala-Asp	1	1	24	18	1342.8	0.999896	1	28	6	23358.8	1	1	26	25.5357	23045.9	4833.25	0.209723	13504	20241	25466	12945	19327	42051	13305	18752	18013	20509	21213	18339	16584	52962	30278	20664	22759.6
Ala-Glu	1	1	18	0	3085.81	0.998582	1	20	4.28e-05	26279.5	0.999999	1	19	2.03e-05	23537.6	3109.29	0.132099	22198	32664	26634	23622	22487	36262	19241	15978	19820	18729	23827	19275	17954	42878	25511	20303	24211.4
Ala-Pro	0.139706	0.411743	24	6	2131.22	0.676903	1	28	6.63e-05	9896.5	0.3176	0.927218	26	3.25003	8113.94	1337.16	0.164798	13539	11395	7344	7308	9814	6999	9052	11624	5780	6747	8333	7095	4033	4746	11453	4909	8135.69
Ala-Thr	1	1	24	6	1713.5	0.943266	1	28	6.63e-05	14106.7	0.998359	1	26	3.25003	11221.7	2243.68	0.199942	9481	19150	11992	15804	12192	14449	10546	5148	9684	11181	10598	9052	8182	14783	8406	8315	11185.2
Arg-Asp	0.475047	0.855944	24	3	1661.35	0.576299	1	28	6.63e-05	13592.2	0.628429	1	26	1.62503	10925.1	49.1345	0.00449738	15692	14739	9777	14161	11025	11238	9597	10640	10409	10154	11365	8625	6753	13393	9112	8137	10926.1
Asn-Arg	0.0579045	0.266686	24	6	18571.1	0.394213	1	24.2975	5.99998	105720	0.109108	0.521437	24.1488	6.00022	92793.8	4834.17	0.0520959	123595	110122	85924	101288	115579	122783	97187	87332	75823	80995	95045	71787	65498	113797	66416	71907	92817.4
Asn-Asn	0.209188	0.550795	24	6	555.079	0.49194	1	28	5.18e-05	2602.5	0.336912	0.945762	26	3.25002	1948.3	72.0699	0.0369912	2913	2323	3051	2123	1712	3254	1639	1581	1581	1495	1890	1361	921	2607	1344	1359	1947.12
Asn-His	0.182589	0.483038	24	6	1560.94	0.421943	1	25.5652	6	7709.25	0.274532	0.865567	24.7826	6.00599	6317.38	784.174	0.12413	8961	6628	7735	6204	8573	10440	5840	5984	4602	6562	6749	4186	4009	7514	3417	4001	6337.81
Asn-Met	0.475047	0.855944	24	6	1226.83	0.537855	1	28	6.63e-05	6526.99	0.604147	1	26	3.25003	4759.64	673.28	0.141456	9083	6386	6557	4082	4858	7172	3705	3913	4343	5291	3816	3439	2415	5411	2116	3392	4748.69
Asn-Thr	0.873774	1	24	6	1337.14	0.73217	1	28	12	10196	0.925513	1	26	8.82143	10089.5	71.118	0.0070487	14716	12771	10659	9868	10650	12008	8573	9191	9618	12409	10147	8610	7846	10252	6731	7486	10095.9
Asn-Val-Lys	0.139706	0.411743	24	6	1770.95	0.922904	1	21.0501	6	9726.25	0.393052	1	22.5251	6.02584	7909.43	1288.03	0.162847	8896	7951	9084	7223	9815	14165	7896	7029	5416	6930	8334	6347	4179	12862	5584	3883	7849.62
Asp-Gln	0.475047	0.855944	24	18	178.014	0.844876	1	25.1282	17.9999	1568.5	0.767756	1	24.5641	18.0095	1425.19	64.7708	0.0454472	1134	1607	1320	1172	1210	1639	1074	1260	1816	1550	1530	1199	1325	1851	1708	1390	1424.06
Asp-His	0.475047	0.855944	24	6	246.073	0.654563	1	26.8085	6	2108.5	0.674176	1	25.4043	6.01839	1893.99	116.436	0.0614768	2312	1884	2138	2004	1922	2890	1820	1802	1728	1989	1904	1492	1392	2066	1625	1424	1899.5
Asp-Ser	1	1	18	3	152.205	0.99994	1	20.0911	6.00001	1570	1	1	19.0456	4.43101	1436.9	187.159	0.130252	1018	1659	2130	1356	1380	2645	1261	994	1175	1196	1593	919	918	2171	1566	968	1434.31
Caffeic acid	0.182589	0.483038	24	6	359.387	0.308733	1	21.0501	5.99999	1096.75	0.218483	0.767213	22.5251	6.02583	864.284	97.6499	0.112984	1232	1083	1093	629	1080	1251	848	1208	425	701	675	612	566	1268	545	540	859.75
Carnitine	1	1	18	9	45315.5	0.999648	1	24.0327	5.99999	874793	1	1	21.0163	7.87755	836417	53681.9	0.0641808	694457	784353	809707	845909	723087	917396	694186	1164503	930745	818740	834908	863488	587508	865362	925116	811276	829421
Chlorogenic acid	0.587657	0.97978	24	6	213.9	0.990026	1	28	6.49e-05	1773.5	0.896917	1	26	3.25003	1621.27	110.35	0.0680643	2624	1752	1498	1220	1660	2184	1301	1910	1542	2152	1440	1284	972	1895	1252	1283	1623.06
Citrulline	1	1	24	18	57.4524	1	1	28	5.99998	2190	1	1	26	25.5357	2189.98	65.0167	0.0296883	2503	2008	1860	2165	1434	2065	2183	3078	2582	1737	1917	2337	2204	1968	2457	2480	2186.12
Cystathionine	0.139706	0.411743	18	9	69.65	0.852955	1	25.1282	6.00002	531.5	0.372655	0.999396	21.5641	7.96552	478.376	67.0432	0.140147	540	428	348	254	463	630	456	577	581	535	437	466	426	571	374	452	471.125
DL-Indole-3-lactic acid	0.380147	0.737824	24	12	42471.8	0.827558	1	20	12	275059	0.678413	1	22	12.1	225298	59874.9	0.265759	265016	220684	137989	143381	180495	216030	157052	357918	294951	330588	226332	248364	187555	243843	154486	183567	221766
Erlose	1	1	24	0	1045.81	1	1	20	6.63e-05	20235	1	1	22	3.65e-05	19663.8	1109.6	0.0564288	17921	24365	16134	22520	14725	16225	21600	26114	20971	13456	15381	24414	22687	12691	26911	19897	19750.8
Erythronolactone	0.719948	1	18	12	1723.57	0.999949	1	20	12	20081.2	0.956494	1	19	12.0333	16653.5	4524.29	0.271672	24446	22481	14176	9963	9705	15995	11480	23222	20093	29742	15941	14549	10201	11366	8865	15679	16119
Gln-Gln	0.0787266	0.310786	24	3	857.544	0.187643	1	28	6.63e-05	3936.74	0.0770384	0.444244	26	1.62503	2745.8	510.715	0.185999	4340	4271	4109	3027	2468	4162	2390	1905	2108	2361	2183	1860	1503	3307	1821	1963	2736.12
Gln-Glu	0.873774	1	24	3	1321.05	0.750166	1	27.1385	6.5e-05	10710.7	0.932345	1	25.5692	1.59811	9189.73	1248.73	0.135883	9818	12293	10227	10505	10060	12773	7373	7113	8316	8379	9067	6609	7194	11017	8203	7739	9167.88
Gln-Phe	1	1	24	12	597.505	0.999037	1	26.4865	5.99999	3680.25	1	1	25.2432	9.16999	3169.88	474.206	0.149598	5098	3543	3041	1584	2580	5408	1881	4852	2750	5531	2694	2447	1429	4031	1570	2709	3196.75
Glu-Ala-Arg	0.105571	0.365115	24	9	3424.87	0.718304	1	20	6.00001	35022.5	0.27142	0.861813	22	7.42501	28561.2	4976.69	0.174246	31133	24285	26362	18665	29176	45192	27879	37843	26238	28650	24802	28447	18589	37723	21442	23871	28143.6
Glu-Lys	0.0579045	0.266686	24	12	4021.32	0.406803	1	24.8451	12	22102.8	0.111852	0.522911	24.4225	12.0036	18222.2	4788.35	0.262775	16862	13423	12317	12269	20672	15962	14057	28624	23760	25864	19238	19549	19783	20429	12910	16905	18289
Gly-Asn	1	1	24	0	40.6586	0.989596	1	24.9858	6.63e-05	546.499	0.999946	1	24.4929	3.25e-05	470.253	82.0344	0.174448	581	418	756	431	399	580	378	393	392	398	432	413	298	772	488	375	469
Gly-Phe	0.0787266	0.310786	24	3	1141.62	0.236083	1	28	7.79e-05	4432.24	0.0926578	0.479792	26	1.62504	2970.47	543.192	0.182864	5606	4586	4679	2858	3212	4543	2547	2286	1925	3051	2380	1604	1350	3697	1122	1917	2960.19
Gly-Ser	0.139706	0.411743	24	3	713.824	0.460839	1	28	6.26e-05	3604	0.240977	0.805858	26	1.62503	2688.35	523.47	0.194718	4227	3892	3549	2748	2443	4304	2101	2217	1802	2556	2496	1722	1226	3499	2191	1882	2678.44
Gly-Thr	0.301037	0.636029	18	0	1973.36	0.968432	1	27.1385	17.9999	9310.75	0.650879	1	22.5692	18.7693	9446.26	1254.68	0.132823	11244	12300	10892	10621	8298	11062	6734	6982	7847	11228	10305	7606	7979	12672	9267	7325	9522.62
Gly-Tyr	0.0787266	0.310786	24	3	3445.02	0.223067	1	28	6.63e-05	15509	0.0885452	0.471621	26	1.62503	10438.8	996.595	0.0954702	21442	15473	14037	11084	10743	14500	9299	7913	8029	10694	8199	6537	5778	11382	4316	7293	10419.9
Glyceraldehyde	0.235786	0.556281	18	15	1793.22	0.998902	1	20	12	16511.8	0.576083	1	19	13.6167	15476	2007.32	0.129706	17674	20095	15481	13015	12378	16075	11987	15059	18533	16327	14601	16586	14334	15087	13812	16261	15456.6
Glycine	0.0579045	0.266686	24	12	413.481	0.465106	1	24.4321	12	2823	0.124275	0.552313	24.2161	12.0009	2292.91	566.615	0.247116	2315	1708	1413	1515	1780	2215	1989	3460	3464	3147	2328	2353	2576	2194	1763	2531	2296.94
Guanine	0.301037	0.636029	24	9	560.736	0.905539	1	26.0177	12	2437.5	0.626913	1	25.0088	10.4565	2027.69	555.062	0.27374	3502	1993	1449	1153	2051	2759	1440	3193	2362	3545	1980	1863	1198	1941	1170	1227	2051.62
His-Ala	0.0579045	0.266686	24	3	880.348	0.0862309	1	28	6.63e-05	3565.74	0.0314553	0.27521	26	1.62503	1955.23	58.4367	0.0298874	4735	3494	3026	3008	1749	2298	1827	1089	1078	1566	1864	1250	803	1542	996	941	1954.12
His-Asp	0.653803	1	24	3	600.51	0.863398	1	28	6.99e-05	5696.5	0.887285	1	26	1.62503	4920.22	321.739	0.0653912	6201	6387	5468	4730	5199	7137	4015	3987	5189	4943	4640	3274	4042	5349	3425	4640	4914.12
His-Gln	0.0787266	0.310786	24	6	1891.86	0.220284	1	28	4.29e-05	6972.74	0.087658	0.471621	26	3.25002	4710.21	109.996	0.0233527	10048	6198	7280	4365	5424	8282	4146	3443	3432	3961	3475	3136	2575	4512	2605	2510	4712
Hypoxanthine	0.475047	0.855944	18	12	29828.4	0.957842	1	23.7736	12	396535	0.813309	1	20.8868	12.2337	349849	66240.5	0.18934	426534	324045	298248	164967	336133	450294	211586	512491	370333	518399	332001	365407	294322	386949	232502	287593	344488
Ile-Ser	0.380147	0.737824	18	12	56600.7	0.949968	1	20	12	425997	0.728945	1	19	12.0333	350210	92849.2	0.265124	424449	399494	308679	277050	328087	267432	265659	406344	414998	537293	397140	354557	323813	206833	169492	346546	339242
Ile-Thr	0.380147	0.737824	24	6	2590.84	0.594344	1	28	12	19772.5	0.56202	1	26	8.82143	18068.9	1606.67	0.0889192	28070	22648	17122	19286	21067	16491	15739	21965	19186	23231	20667	16006	14446	13938	8933	12625	18213.8
Isoleucine	0.105571	0.365115	24	12	89183.1	0.720937	1	22.7907	12	718998	0.272136	0.862126	23.3953	12.008	607068	136210	0.224374	722085	541775	389900	403780	574202	585345	479510	896237	812991	820415	584197	658387	570429	609910	475208	546377	604422
Kynurenic acid	0.235786	0.556281	24	6	97.404	0.734123	1	23.1496	6.00001	496	0.476691	1	23.5748	6.00196	394.999	68.0042	0.172163	625	482	396	251	430	544	274	736	376	408	336	242	284	407	217	297	394.062
L-Cystine	0.475047	0.855944	24	12	4539.45	0.821029	1	20.1831	12	31954.5	0.757253	1	22.0915	12.0902	25226.5	6989.11	0.277055	30694	24143	9433	17320	22886	18586	19505	34824	39757	37644	24514	25903	30418	14239	18975	28436	24829.8
L-Saccharopine	1	1	18	3	288.323	1	1	20.2759	6	5727.25	1	1	19.1379	4.42646	5510.86	247.137	0.0448454	5782	6892	5147	4614	4798	6416	4920	6775	6084	5958	4808	4258	4096	5310	5662	6595	5507.19
Lys-Pro	0.301037	0.636029	24	6	3395.53	0.679082	1	28	4.42e-05	27710.7	0.528967	1	26	3.25002	23989	210.13	0.00875944	36575	29206	20368	24694	28652	22722	22167	29669	24374	21589	26663	21982	14101	16119	27048	17950	23992.4
Malonic acid	1	1	24	12	158.745	1	1	23.9024	12	1592.5	1	1	23.9512	12.0001	1468.78	173.93	0.118418	2394	1104	1247	877	1223	1728	1027	2136	1860	1855	1231	1424	1174	1581	982	1653	1468.5
Met-Gln	1	1	18	0	1974.24	0.978496	1	28	6.63e-05	6939.99	0.999767	1	23	2.72e-05	5312.52	371.276	0.069887	7853	7529	8167	4211	3949	9123	3111	4356	4591	6530	4553	3829	3003	7932	2869	3609	5325.94
Met-Trp	0.475047	0.855944	18	12	171.827	0.993351	1	20	12	1987	0.826283	1	19	12.0333	1681.65	352.572	0.209659	2369	1706	1632	928	1730	1665	867	1809	2051	2461	1527	1909	1206	1720	1292	1368	1640
Methacholine cation	0.182589	0.483038	24	9	1611.85	0.685478	1	24.0327	5.99998	9112.5	0.385264	1	24.0163	7.50102	7588.35	1649.46	0.217368	9290	6873	6519	5158	7799	10647	5938	12066	8203	9412	6597	8672	4817	8845	5046	5550	7589.5
Methionine	0.301037	0.636029	24	15	29777.3	0.496154	1	20.5594	12	313384	0.433354	1	22.2797	13.4645	255285	71530.2	0.280197	286453	230669	183486	157948	219348	251680	182156	309974	321696	397138	269563	265141	231651	273026	205394	271084	253525
Methylacetate	1	1	24	12	2519.42	0.995186	1	28	12	25841.5	0.999988	1	26	12.0714	22740.4	4023.03	0.176911	25544	32382	21807	15812	18795	25354	21250	29123	26611	34264	21588	20903	19536	16592	16182	22383	23007.9
Methylsuccinic acid	1	1	18	3	72.832	1	1	20	6.00001	2805.5	1	1	19	4.43334	2725.32	165.165	0.0606037	3176	2825	2754	1804	2712	3293	2462	2755	2739	2948	2276	2468	2894	2839	2798	2827	2723.12
Myristoyl-L-carnitine	0.301037	0.636029	24	6	852.771	0.458049	1	20.6557	6	5001	0.411091	1	22.3279	6.03384	4016.41	631.087	0.157127	4362	5452	4825	2498	4022	6903	3727	5352	3245	3242	3435	3050	2879	3818	3859	3065	3983.38
N-(2-Furoyl)glycine	1	1	18	12	1042.1	0.999914	1	20	12	12115	1	1	19	12.0333	10840.8	1323.25	0.122062	14289	10031	10101	7613	7067	11713	7495	13605	11408	15742	8947	12363	7537	12713	8269	12059	10684.5
N-Acetyl-DL-leucine	0.0579045	0.266686	24	9	16754.2	0.409638	1	22.5575	6.00002	74013.8	0.112467	0.523773	23.2788	7.4607	53348.4	20675.3	0.387551	57147	29689	48268	35146	65717	68355	44533	117450	55811	47235	60979	68053	15747	31671	59888	37731	52713.8
N-Acetylalanine	0.0579045	0.266686	24	12	11436	0.430313	1	24.0327	12	46833.5	0.116916	0.530688	24.0163	12	37629.6	13438.2	0.357118	39211	25138	28666	20943	36770	48725	25243	65157	48008	49857	42722	46747	16743	30457	36160	41641	37636.8
N-Acetylglucosamine	0.182589	0.483038	18	12	384.313	0.800006	1	20	12	2095	0.427065	1	19	12.0333	1629.72	558.423	0.34265	2395	1510	1014	909	1447	1898	930	1986	2423	2548	1791	1618	1083	1540	749	1179	1563.75
N-Acetylleucine	0.0787266	0.310786	24	9	70072.3	0.562249	1	22.7907	5.99999	301419	0.182261	0.685888	23.3953	7.46621	221823	85652.3	0.386129	199793	150609	181722	132575	221773	299620	204376	479906	224406	217476	314120	238407	67392	90844	301913	188933	219617
N-Acetylmannosamine	0.587657	0.97978	18	12	7852.42	0.85442	1	20	12	50730.2	0.848029	1	19	12.0333	41650.2	9922.54	0.238235	52267	44229	32919	30489	34792	46430	26673	36721	61659	58752	43394	39116	31530	36438	28396	43843	40478
N-Acetylmethionine	0.0579045	0.266686	24	6	75759.8	0.442128	1	28	6	406707	0.119433	0.536774	26	6.03571	343230	59548.4	0.173494	451824	456552	306367	391000	410781	247356	492238	476452	369814	272940	412781	367880	136118	132899	384595	246912	347282
N-Acetylphenylalanine	0.105571	0.365115	24	12	38662.1	0.512714	1	24.4321	12	144658	0.211986	0.750828	24.2161	12.0009	104175	49457.6	0.474755	87326	56771	61520	34038	78565	141645	47609	208516	197105	160154	103974	117399	52370	99923	91495	134011	104526
N-Acetylserine	0.301037	0.636029	24	12	1681.5	0.788679	1	23.3952	12	8151.75	0.578814	1	23.6976	12.0019	6262.83	2376.53	0.379466	6135	4819	4408	3054	4894	6852	3386	12461	9904	9936	5811	6956	3385	6087	3999	7745	6239.5
N-Isovalerylglycine	0.475047	0.855944	24	12	23850.4	0.759795	1	26.8085	12	116238	0.728752	1	25.4043	12.0368	92803.1	27253.5	0.29367	74907	59519	57383	35039	68507	155829	39192	148487	154258	120894	91964	97835	49492	135840	105866	110212	94076.5
N-Lauroyl-L-arginine	1	1	18	9	435.931	0.999998	1	28	6	5008.25	1	1	23	8.21429	4763.35	208.102	0.0436882	5115	5052	3719	2678	3497	6057	3411	7068	4882	5692	4038	4425	3817	5768	5620	5223	4753.88
N-Methylglutamic acid	1	1	18	3	68.2358	0.999401	1	20.5594	5.99998	740.5	1	1	19.2797	4.4199	679.512	69.4662	0.10223	863	734	593	651	496	625	734	1107	782	481	612	577	664	479	661	795	678.375
N-Methylserine	0.139706	0.411743	24	15	12473.7	0.739352	1	23.7736	12	130918	0.337785	0.945762	23.8868	13.4932	106732	32849.9	0.30778	118506	92696	59593	63239	93882	96573	76544	178086	155818	152428	103539	111888	107208	109351	85503	101813	106667
N-omega-Acetylhistamine	0.139706	0.411743	24	3	4171.58	0.223909	1	28	6.63e-05	15038.5	0.139663	0.598165	26	1.62503	9660.45	1296.76	0.134234	18315	16990	12715	12134	9541	12922	6704	11405	9009	14193	6166	4966	6983	7314	2988	2615	9685
N2-Isobutyryl-2'-deoxyguanosine	0.105571	0.365115	18	12	164.756	0.995797	1	20	12	1556.75	0.341935	0.949516	19	12.0333	1282.2	355.095	0.276942	2022	1364	1030	759	1107	1475	861	1395	1544	2253	1342	1088	753	1028	803	1020	1240.25
Nicotinamide	0.380147	0.737824	24	6	581.242	0.92845	1	25.4179	5.99999	4943.25	0.72052	1	24.7089	6.00494	4201.21	685.887	0.163259	5942	4498	3931	3213	5034	5546	3178	6015	4349	5980	3277	3097	2497	5203	3172	2546	4217.38
Octopine	1	1	18	0	3216.98	0.555906	1	28	6.63e-05	13575	0.88231	1	23	2.72e-05	9694.6	765.153	0.0789256	15498	15285	8552	14965	7287	9570	5638	13673	10678	8072	9269	7588	6450	9661	7590	5780	9722.25
Oxypurinol	0.0579045	0.266686	24	15	66258	0.38379	1	22.2166	12	554826	0.106818	0.513133	23.1083	13.4622	474361	91169.7	0.192195	481734	460103	398348	287017	387337	533093	340067	485629	583366	649278	498746	487913	462752	530203	462391	520599	473036
Phe-Asn	1	1	24	12	1331.13	0.983513	1	23.9024	6	10825.5	0.999863	1	23.9512	8.99393	8531.93	1599.85	0.187513	13633	10936	5579	3932	6781	12916	5252	18353	9532	12288	5534	6632	5813	7119	3749	8404	8528.31
Phe-Asp	1	1	24	12	245.189	0.970906	1	20	6.00001	2050.5	0.999573	1	22	8.80001	1626.21	270.936	0.166606	1850	1365	1651	802	1643	3141	1148	2270	1539	1957	1429	1262	1136	2438	807	1178	1601
Phe-Ser	0.235786	0.556281	24	12	2166.22	0.620302	1	20	12	12700.2	0.427423	1	22	12.1	9918.64	3317.29	0.33445	10603	7216	8588	5944	10219	11277	5709	12783	10941	18495	9068	12297	6754	10068	6679	8926	9722.94
Phenylalanine	0.235786	0.556281	24	15	106737	0.62294	1	20.464	12	1.05296e+06	0.428618	1	22.232	13.4659	851079	248299	0.291746	1023742	781074	564447	484680	692995	838399	590511	1054059	1190290	1294402	822113	905054	793692	883617	682067	916646	844862
Phenylpyruvic acid	0.719948	1	24	15	99.3485	0.932983	1	27.6489	12	725.75	0.938998	1	25.8245	13.6742	643.18	93.9441	0.146062	621	630	497	331	514	778	375	917	711	909	520	763	589	797	650	741	646.438
Phosphocholine	0.0579045	0.266686	24	9	766.327	0.451853	1	23.3952	6	2602	0.12149	0.544269	23.6976	7.48208	1681.09	820.637	0.488157	2898	1698	898	411	1943	3898	1641	2926	1615	2784	936	1781	696	1731	238	634	1670.5
Phosphoenolpyruvic acid	0.235786	0.556281	24	6	185.969	0.364231	1	20	6.00002	1156.75	0.296701	0.898147	22	6.05001	818.643	275.362	0.336364	950	813	767	626	624	1466	998	1539	681	658	422	746	279	981	571	704	801.562
Phthalic acid	1	1	24	12	637.81	1	1	20.0911	12	8802.5	1	1	22.0456	12.0951	8137.87	716.825	0.0880851	11096	7446	7586	4499	6916	10373	5908	9015	8418	11160	7639	7993	6242	11529	6822	6900	8096.38
Picolinic acid	0.139706	0.411743	18	9	27436.6	0.565632	1	24.5682	6.00002	96536.2	0.279583	0.870888	21.2841	7.92002	81989.7	22931.3	0.279685	76624	60027	49868	36813	69060	119909	61114	136062	102947	109483	70810	98374	53923	108342	48930	65652	79246.1
Pro-Leu	0.0579045	0.266686	24	12	5435.18	0.275108	1	23.2718	12	26186	0.081873	0.455194	23.6359	12.0028	20345.5	7070.71	0.347533	20887	18454	10739	10392	22848	14277	18456	31992	29614	26946	22018	26166	18687	16226	17175	19316	20262.1
Pro-Thr	0.301037	0.636029	24	9	114111	0.693815	1	20.1831	6.00001	803826	0.53596	1	22.0915	7.42584	612434	159449	0.260354	484428	378509	761836	504025	583061	771891	621576	1238778	791585	413474	606533	553751	252523	405510	610088	616808	599648
Pro-Trp	0.105571	0.365115	24	15	2881.64	0.38663	1	22.1053	12	18555	0.171376	0.669903	23.0526	13.4611	13937.1	5886.86	0.422387	13918	12479	6050	7898	13222	9606	10203	21890	21618	21209	13692	17701	14165	13830	9756	14313	13846.9
Pseudouridine	0.235786	0.556281	24	15	4650.29	0.494588	1	20	12	39421	0.367211	0.991972	22	13.475	32644.8	8601.07	0.263474	39743	32629	24042	21395	26693	30973	21793	35333	44159	45591	34362	33572	32819	30602	30635	34275	32413.5
S-Adenosyl-methionine	0.139706	0.411743	24	15	393.682	0.462706	1	21.3559	12	3511.25	0.241692	0.805948	22.678	13.4583	2912.11	716.735	0.246122	3220	2641	1766	2210	3312	2657	2032	2766	4431	3656	2750	3208	2958	3209	2820	2725	2897.56
Ser-Asn	0.139706	0.411743	24	3	888.833	0.167897	1	28	6.63e-05	4144.49	0.111479	0.522911	26	1.62503	2854.88	267.832	0.0938154	4827	3338	4366	4047	2558	4073	2538	1920	1956	2379	2823	2157	1594	3097	2074	1850	2849.81
Ser-Asp	0.873774	1	24	3	3134.25	0.99978	1	20	6	27071	0.991649	1	22	4.675	24619.8	2754.73	0.111891	25543	27860	32231	19860	24774	45106	20833	17571	19039	21683	24419	16534	12920	42364	22626	19201	24535.2
Ser-Glu	1	1	18	12	1160.72	1	1	20	12	24077.5	1	1	19	12.0333	23442.7	640.645	0.0273281	23030	26932	21397	22327	21376	28874	20736	20312	23028	24749	28226	20307	19202	29939	21789	21648	23367
Ser-Ser	0.105571	0.365115	24	3	1645.08	0.0733892	1	28	6.63e-05	7771.73	0.0454045	0.331738	26	1.62503	5061.29	507.019	0.100176	7852	7792	8796	6647	5161	5360	4772	3247	3391	3934	4821	3851	2888	5412	3370	3533	5051.69
Ser-Tyr	0.653803	1	24	3	540.583	0.875339	1	28	12	3787.75	0.891695	1	26	7.19643	4022.96	425.12	0.105674	6216	5096	5487	3699	3404	5462	3105	3008	3761	5035	3505	2850	2472	4875	2828	3008	3988.19
Stachydrine	0.873774	1	18	0	1325.83	0.992041	1	27.8233	17.9999	7521.5	0.990709	1	22.9117	18.867	7719.1	596.1	0.077224	8593	8569	8913	8877	6057	7586	5692	10088	9265	6545	6842	6831	5515	8147	8726	7698	7746.5
Succinic acid	0.873774	1	18	12	7556.85	0.998412	1	26.8085	12	172003	0.991487	1	22.4043	12.4824	151066	30081.3	0.199127	170761	200141	140372	102104	113586	165182	135508	188437	175199	231134	146733	134945	124761	117976	106270	143895	149813
Sucrose	0.873774	1	24	18	1388.05	0.811286	1	28	17.9999	19829.5	0.952784	1	26	18.1071	17728.8	1079.54	0.0608918	16527	18004	15255	16491	13805	17540	17479	17419	18867	17076	14310	20651	18690	15648	22382	22598	17671.4
Tagatose	1	1	18	15	21089.5	0.999999	1	20	12	320536	1	1	19	13.6167	302112	28431.9	0.0941104	341689	376198	287529	246906	246429	330580	230119	327304	358767	332790	289204	301382	262168	310170	260583	327565	301836
Thr-Arg	0.182589	0.483038	24	6	16284	0.367642	1	26.6465	5.99998	116914	0.248449	0.815508	25.3233	6.01642	103007	9499.35	0.0922205	133022	130438	88611	98333	129383	134213	110974	93088	93424	98281	101327	100197	86628	101531	83257	72172	103430
Thr-Gln	0.139706	0.411743	24	6	2713.52	0.181764	1	28	6.63e-05	13941.7	0.118671	0.535073	26	3.25003	9689.58	2625.94	0.271007	16764	16268	11869	10866	11200	11122	8213	7091	8117	9059	9740	7005	6123	8996	5248	6669	9646.88
Thr-Gly-Thr	0.301037	0.636029	24	3	1053.06	0.743746	1	26.4865	6.4e-05	5071.99	0.558972	1	25.2432	1.57773	3963.84	1002.54	0.252921	5019	5540	5368	4361	3907	5990	3723	2525	2489	3757	3875	2335	1886	6145	3660	2593	3948.31
Thr-Ser	0.182589	0.483038	24	3	3063.19	0.252696	1	28	6.63e-05	19855.5	0.188068	0.700799	26	1.62503	14700.9	1033.02	0.0702693	21376	21832	18072	18142	14501	18310	13864	9498	11438	14263	14906	9944	10152	17517	10886	10201	14681.4
Thr-Tyr	0.0787266	0.310786	24	3	5683.55	0.218542	1	28	6.63e-05	25586	0.0871016	0.471621	26	1.62503	18012.2	1121.12	0.0622424	30514	28871	24603	18356	18192	25176	15783	15262	14365	18202	15452	12264	10187	20867	7293	12469	17991
Tropic acid	0.475047	0.855944	18	12	6297.49	0.778207	1	20	12	36112.5	0.73756	1	19	12.0333	30187.1	6731.89	0.223005	34785	28907	19895	21526	24683	28830	21318	44785	39146	41954	30328	33022	23248	31755	21275	24813	29391.9
Trp-Trp	0.0787266	0.310786	24	6	196.929	0.40807	1	26.8085	6	886.75	0.142578	0.603846	25.4043	6.01839	709.275	126.286	0.178049	1180	911	725	495	965	1064	599	919	584	644	739	666	322	804	375	452	715.25
Tryptophan	0.235786	0.556281	24	15	13380.8	0.62646	1	20.1831	12	127852	0.430207	1	22.0915	13.4709	99219.6	35241.3	0.355185	121325	89780	59489	51105	79335	93938	65591	124930	140157	174028	93690	103533	94785	100030	75054	105960	98295.6
Tyr-Asp	1	1	24	12	1872.95	0.998875	1	23.7736	6.00001	12370.8	0.999999	1	23.8868	8.98599	10817	1783.1	0.164843	12205	9255	11019	5373	11637	19828	6796	11222	12909	14348	10186	9656	7062	16897	5940	8589	10807.6
Tyrosine	0.301037	0.636029	24	15	11946.2	0.641564	1	20.3695	12	143143	0.510719	1	22.1848	13.4674	116656	32946.2	0.282423	130564	111931	83171	68637	96338	122077	86060	142439	146024	188481	115115	122951	99511	122630	90921	126221	115817
Uridine	1	1	18	12	202605	0.992219	1	20	12	1772910	0.99997	1	19	12.0333	1.57446e+06	207471	0.131773	2068710	1538733	1252454	1116590	1394215	1663038	1101058	1717643	1947573	2206150	1464974	1472943	1377161	1687126	1279061	1511766	1.54995e+06
Uridine-5-diphosphoacetylglucosamine	0.105571	0.365115	24	6	9846.82	0.792122	1	23.3952	6	65180	0.291133	0.895029	23.6976	6.00098	55953.9	6862.59	0.122647	60512	62832	64547	48477	56954	77178	61511	65077	61198	55966	45936	45283	28952	76685	48300	34776	55886.5
Val-Ser	0.475047	0.855944	24	6	16941.9	0.397718	1	28	12	76113.5	0.503767	1	26	8.82143	73757.6	2011.51	0.0272719	115638	106585	77810	91379	90917	60290	84133	63148	60779	85682	89006	68987	63781	30760	39041	55087	73938.9
Val-Thr	0.0787266	0.310786	18	12	1751.86	0.677396	1	26.8085	12	33629	0.209651	0.745913	22.4043	12.4824	29044.8	8926.14	0.307323	43045	33395	23504	18353	30622	28649	24018	48909	35018	42705	28924	27869	22631	17306	13565	20254	28672.9
Valine	0.105571	0.365115	24	15	13753.4	0.276291	1	22.2166	12	96993	0.132268	0.575017	23.1083	13.4622	76989.9	24312.4	0.315787	72366	66197	56125	45824	63021	85994	52441	88907	106322	118629	77398	85623	69509	82214	62536	93080	76636.6
alpha-Galactosamine-1-phosphate	0.182589	0.483038	18	12	1281.63	0.960332	1	20	12	10951	0.480622	1	19	12.0333	9257.92	2151.52	0.232398	12867	9823	7127	4977	7872	10228	7331	11717	13672	13032	8165	8935	6421	8974	5706	7213	9003.75
gamma-Glutamylglutamine	1	1	18	3	433.81	0.996496	1	20	6	4597	0.999994	1	19	4.43333	4063.66	720.821	0.177382	4358	4525	4007	3116	4269	6757	3865	3497	3817	3418	3631	3133	2749	5652	4339	3732	4054.06
unknown1	0.301037	0.636029	24	18	4306.81	0.800529	1	28	17.9999	14977	0.583917	1	26	18.1071	10524.6	1977.48	0.187891	3119	4199	9411	11383	4037	4033	15978	5495	8001	4817	14473	21858	8406	9965	18156	23381	10419.5
unknown100	0.105571	0.365115	24	18	9258.15	0.356042	1	28	17.9999	47081.2	0.160916	0.650822	26	18.1071	37454.1	5532.37	0.147711	28194	33961	25984	36783	23178	26995	32755	38565	48943	35614	31524	43739	53211	27235	52561	55318	37160
unknown1003	0.235786	0.556281	18	3	325.623	0.501089	1	24.0327	17.9999	4252.74	0.370495	0.99593	21.0163	20.1299	3634.78	677.646	0.186434	3132	5084	4214	4477	2425	3562	2942	3912	3354	2601	3416	3497	3189	3737	5434	4651	3726.69
unknown1004	0.301037	0.636029	24	12	1009.39	0.866063	1	20	12	6057.5	0.611204	1	22	12.1	4971.05	1343.09	0.270183	5962	5011	3270	3250	4088	5049	2938	8057	6861	6255	5612	5502	3582	5217	3563	4052	4891.81
unknown1007	0.719948	1	24	6	435.401	0.771038	1	28	6.63e-05	4614.99	0.88184	1	26	3.25003	3526.1	620.986	0.176111	6688	5344	2891	3537	4613	2842	3349	3361	3360	4118	3049	2780	3175	2739	1223	3187	3516
unknown1012	1	1	18	15	313.955	0.973128	1	20	12	3732	0.999636	1	19	13.6167	3579.46	292.964	0.0818459	4107	3112	3371	3916	3352	3123	3238	3160	4455	4061	3098	3314	2869	4433	3795	3822	3576.62
unknown1027	1	1	24	18	2776.63	1	1	24.9858	6.00002	53362.5	1	1	24.4929	24.3721	47790.8	4489.97	0.0939504	39388	35750	79893	11905	29701	104768	23635	55346	56658	75580	30507	34533	31326	67456	37507	51834	47861.7
unknown1032	1	1	18	6	790.192	1	1	28	6	5946.5	1	1	23	6.29762	5315.19	613.325	0.115391	5126	5184	5369	1968	4604	7843	3840	7499	5866	7260	3492	3481	4641	6806	5753	5973	5294.06
unknown1036	1	1	18	12	1020.36	0.996969	1	21.7778	12	10322	0.999995	1	19.8889	12.1092	9276.7	1087.55	0.117234	12279	8423	6537	5888	9003	10109	6800	10624	12928	12091	7006	9263	7994	10212	8303	9169	9164.31
unknown1042	0.182589	0.483038	24	15	610.94	0.614288	1	22.4427	12	5135.5	0.357552	0.97549	23.2214	13.4648	4380.55	874.497	0.199632	4469	3915	3576	2961	3696	4268	3221	5220	5844	6104	4179	4415	3650	5284	3976	5131	4369.31
unknown1047	0.719948	1	24	0	91.9239	0.849781	1	25.1282	7.37e-05	1405.75	0.912407	1	24.5641	3.6e-05	1182.78	196.569	0.166192	1608	1992	1138	885	1120	1561	1091	993	770	950	1139	1069	934	1130	1242	1248	1179.38
unknown1065	0.182589	0.483038	24	15	635.512	0.772039	1	28	6	1877.5	0.417151	1	26	10.9107	1665.6	163.565	0.0982015	449	432	1007	428	1152	2478	935	2945	2092	1798	1630	1590	1044	2993	4223	1665	1678.81
unknown1072	0.182589	0.483038	24	15	577.706	0.707378	1	20	12	6444	0.393511	1	22	13.475	5429.7	1274.04	0.234644	5718	5938	3444	4097	4494	4607	4457	7426	6309	6496	5822	7149	6077	5140	4577	4576	5395.44
unknown1075	0.105571	0.365115	24	12	2440.93	0.543401	1	25.4179	12	7964.25	0.221339	0.771028	24.7089	12.0099	5887.64	2764.49	0.469541	3050	2394	5065	1616	4658	11797	3506	8761	7954	11058	6031	6814	2616	9253	4172	6496	5952.56
unknown1077	1	1	18	0	744.583	0.998904	1	24.2975	18	5229.25	0.999999	1	21.1488	18.408	4826.99	872.885	0.180834	4427	4497	7994	6453	3692	5196	4394	3012	3409	5022	5618	4336	2636	9889	4365	4027	4935.44
unknown1081	0.235786	0.556281	24	18	858.074	0.383763	1	25.8651	12	3839.25	0.307884	0.908722	24.9326	15.1334	3274.32	694.029	0.211962	3188	3163	1839	2182	2469	2628	2153	4107	4541	4520	3072	3224	3833	3132	3706	4644	3275.06
unknown1087	0.873774	1	18	6	470.933	0.999961	1	20	5.99998	6794	0.991671	1	19	6.01666	6412.28	397.885	0.0620505	5495	7617	6175	5305	6705	6802	5412	8257	5756	4928	6234	6815	6334	6650	6873	6467	6364.06
unknown1092	1	1	18	12	739.987	0.998921	1	20	12	6379.75	0.999999	1	19	12.0333	5768.5	599.986	0.104011	7536	5849	4760	3810	5269	5784	3946	6467	7506	7695	5077	5241	5208	6573	4986	5455	5697.62
unknown1094	0.301037	0.636029	18	9	3954.14	0.968238	1	28	5.99999	11692	0.650807	1	23	8.21428	9057.44	2296.18	0.253513	3463	3952	5545	2667	7492	15874	5171	18231	8974	8441	8067	11233	4441	13513	18077	8106	8952.94
unknown1097	0.587657	0.97978	18	12	3450.33	0.850054	1	20	12	21873.5	0.846255	1	19	12.0333	18498.7	3739.03	0.202124	20323	17970	12303	14677	15423	16932	12823	26960	26202	24259	18688	18345	15144	19735	13733	15395	18057
unknown1101	1	1	18	3	4232.56	0.999939	1	20	6	76754.5	1	1	19	4.43333	74265	3686.61	0.0496412	72526	83506	77235	62768	77529	79577	78366	71546	65736	69354	67563	82100	68802	77816	82392	70639	74215.9
unknown1108	1	1	18	9	3470.13	1	1	22.3291	12	15182.8	1	1	20.1646	10.4595	13151	920.152	0.0699684	5188	33994	4050	1733	15615	10800	7863	12508	14551	5800	30011	10369	33404	3460	9122	9635	13006.4
unknown111	0.0787266	0.310786	24	15	5453.56	0.500454	1	28	12	11504.8	0.166816	0.663225	26	13.6964	8325.64	3143.29	0.377544	1411	5662	4038	1827	11940	10449	6459	2395	13820	13129	3565	15505	13319	14227	15398	1982	8445.38
unknown1118	0.380147	0.737824	24	3	1563.77	0.593529	1	28	6.63e-05	6700.74	0.561559	1	26	1.62503	4502.4	635.136	0.141066	7263	6833	7457	5250	3746	6645	3416	2931	2642	4456	3945	3079	1382	7926	2109	2766	4490.38
unknown1119	0.380147	0.737824	24	15	492.853	0.909929	1	28	6.00001	2221.5	0.713117	1	26	10.9107	1937.02	111.191	0.0574031	647	777	1538	483	1475	3294	1203	2914	2180	1784	1947	1807	1443	2962	4805	1877	1946
unknown1120	1	1	18	0	2665.09	0.999994	1	28	6.63e-05	14255.7	1	1	23	2.72e-05	11717	714.204	0.0609545	14767	12624	19045	10587	9315	20629	7464	8597	9563	15122	11084	7735	4345	24613	5712	6683	11742.8
unknown113	0.182589	0.483038	24	12	734.33	0.431701	1	22.3291	12	7523.25	0.279079	0.870888	23.1646	12.0156	6234.22	1301.12	0.208706	6770	5450	4505	3762	5457	6272	5160	7612	7303	9690	6337	6763	6039	6448	5097	6529	6199.62
unknown1135	0.0787266	0.310786	18	6	529.623	0.956108	1	20	6	2352.5	0.269972	0.859169	19	6.01667	1880.58	458.674	0.2439	1576	1976	2071	1004	1804	3357	1514	2735	924	1362	1574	956	1021	2673	3025	1628	1825
unknown1162	1	1	18	0	139.3	0.999999	1	28	6.63e-05	3275.25	1	1	23	2.72e-05	3133.15	52.6121	0.0167921	3991	3243	2568	3299	2473	3055	3037	4066	3826	2768	2866	3129	3124	2620	3014	3021	3131.25
unknown1167	0.139706	0.411743	18	12	1333.25	0.605574	1	24.7059	5.99999	11993.5	0.293553	0.897067	21.3529	9.7105	10081.4	2794.89	0.277233	14450	9422	4530	6510	13374	7495	8833	18272	9504	13933	12047	11184	6533	6182	5727	7931	9745.44
unknown1168	0.380147	0.737824	24	12	756.958	0.707659	1	23.7736	12	7226	0.622228	1	23.8868	12.0003	6309.63	1084.49	0.171878	6372	5533	5030	4725	6181	6499	4927	8592	8942	7481	6038	6443	5010	6883	5647	6587	6305.62
unknown1170	0.873774	1	18	12	572.58	0.981495	1	22.6735	12	6006	0.989343	1	20.3368	12.1606	5402.64	780.609	0.144487	6482	5667	4407	3129	5629	6941	3733	5964	6544	7372	4866	5242	4109	5429	4681	5075	5329.38
unknown1176	0.873774	1	24	12	292.389	0.994251	1	24.7059	12	4660.25	0.990983	1	24.3529	12.0025	4388.22	367.717	0.0837964	3717	4033	4045	4419	3608	4721	3937	5943	4967	4142	4703	4829	3370	4611	4959	4276	4392.5
unknown1178	0.235786	0.556281	24	12	3401.18	0.800632	1	20	12	47040.8	0.503506	1	22	12.1	41986.6	5549.32	0.132169	46421	39258	32099	36331	37156	41255	34691	52497	48739	53484	41969	43971	39297	43862	34460	41058	41659.2
unknown118	0.873774	1	24	12	17652.4	0.988186	1	20	12	251541	0.990221	1	22	12.1	218275	34306	0.157168	295414	200874	175235	143585	199688	233767	156866	239809	266226	335989	203978	199971	192918	236748	177076	201878	216251
unknown1186	0.873774	1	18	12	2049.55	0.941461	1	20	12	12341.2	0.983246	1	19	12.0333	9915.81	2724.17	0.27473	14461	12559	4522	5045	11254	6777	6316	11440	12783	13755	12243	10584	8131	6702	8976	7956	9594
unknown1195	0.105571	0.365115	24	15	1625.46	0.568181	1	20.7529	12	10291.8	0.228757	0.787253	22.3765	13.462	7958.62	2887.05	0.362757	8634	6604	5043	4805	5536	8044	5171	11216	10774	12944	8178	9271	5574	9953	5695	8803	7890.31
unknown1196	1	1	24	12	3095.01	0.999973	1	25.4179	12	32444.5	1	1	24.7089	12.0099	29181.3	4110.84	0.140872	38885	25519	28323	23673	21477	33771	22875	41368	28392	41234	25133	35019	17859	34522	22505	27890	29277.8
unknown1197	0.139706	0.411743	24	15	618.365	0.532177	1	22.3291	12	4717.25	0.26758	0.855822	23.1646	13.4634	3814.52	1091.12	0.286045	3832	3361	2768	2209	3083	4045	2532	4770	5071	6223	3843	3732	3284	4594	3384	4062	3799.56
unknown1199	0.139706	0.411743	24	6	2206.7	0.624064	1	28	6.63e-05	11490.2	0.299894	0.899408	26	3.25003	6875.42	2627.45	0.382151	21260	12597	5863	6241	6689	8825	5266	6057	5173	8731	4873	3379	2944	6147	1871	3407	6832.69
unknown1201	1	1	24	12	397.394	0.991107	1	23.0287	12	5096	0.99996	1	23.5144	12.0051	4445.6	784.031	0.176361	4779	3710	4740	2278	4124	6084	3419	4788	4626	7317	4153	4288	2873	5792	3766	4196	4433.31
unknown1203	0.301037	0.636029	24	12	494.268	0.807779	1	23.52	12	4714.5	0.587013	1	23.76	12.0012	4101.25	792.744	0.193293	4400	3876	2957	3026	3502	4113	3325	6426	5431	4797	4143	4487	3728	4197	3429	3684	4095.06
unknown1213	0.475047	0.855944	24	6	429.214	0.999668	1	20	6	3542.75	0.828527	1	22	6.05	3015.33	393.249	0.130416	3314	2626	3899	2232	2682	5383	2856	3250	2935	3016	2337	2308	1479	5599	2210	1729	2990.94
unknown1215	1	1	24	12	769.863	0.995781	1	27.4766	5.99999	5604.75	0.999991	1	25.7383	9.24478	5074.18	626.751	0.123518	8281	6158	4146	2744	4978	6229	3999	7213	5789	7322	4425	4344	3515	4802	3311	4719	5123.44
unknown1218	0.182589	0.483038	24	3	1110.86	0.574713	1	28	5.78e-05	6809.74	0.341505	0.949516	26	1.62503	5110.97	460.543	0.0901087	10345	4232	7171	5491	6181	4869	5026	5306	4018	4019	3740	5595	2439	6025	4204	2975	5102.25
unknown122	0.380147	0.737824	24	15	994.369	0.749282	1	28	6	3057.5	0.642547	1	26	10.9107	2681.82	405.362	0.151152	1124	1275	1676	937	1995	3916	1685	4634	3325	2911	2191	3494	1311	4418	5126	3415	2714.56
unknown1222	1	1	18	3	437.346	0.99782	1	20	5.99999	5277.75	0.999998	1	19	4.43333	5106.02	410.279	0.080352	5356	6986	4552	4184	4049	6546	5096	5420	4143	4274	4834	5097	5072	4834	5399	5767	5100.56
unknown1229	0.0787266	0.310786	24	21	488.611	0.46837	1	20	17.9999	5886.75	0.158565	0.643247	22	19.525	5477.63	451.41	0.0824097	5751	6329	5042	6002	4349	5187	4571	4807	5790	5640	6180	5114	6396	4433	6475	6243	5519.31
unknown1231	0.873774	1	24	12	61343.8	0.753468	1	23.52	12	484374	0.933557	1	23.76	12.0012	412349	81208.1	0.19694	431487	390442	287259	270728	386168	386140	316349	606540	571197	552090	383813	430397	423897	369175	342046	439723	411716
unknown1232	1	1	18	9	849.235	0.999631	1	20	6.00001	16439.2	1	1	19	7.6	15128	1201.44	0.0794184	13978	14562	13331	11846	12724	16693	14078	22262	15353	14783	13950	14521	15603	14308	12548	17729	14891.8
unknown1235	0.301037	0.636029	18	9	1527	0.921088	1	28	6	5039	0.632957	1	23	8.21429	4029.52	978.32	0.242788	1960	2555	2449	1779	3026	6580	2748	7802	4459	3845	3719	4896	2408	4336	6176	5022	3985
unknown1236	0.587657	0.97978	18	12	52220.9	0.871782	1	21.1511	12	486680	0.854955	1	19.5755	12.0782	436885	57353.7	0.131279	482540	405696	323093	361055	398970	424526	346211	596716	521086	554038	424557	447040	401004	439167	360461	403738	430619
unknown1244	0.235786	0.556281	24	6	643.467	0.957736	1	20	6	3353.5	0.561846	1	22	6.05	2713.5	344.523	0.126967	3318	2733	3667	1948	2909	5480	2463	2562	1748	2007	2150	2239	1373	4883	2035	1559	2692.12
unknown1250	0.139706	0.411743	24	15	2091.62	0.380982	1	24.0327	12	13203.5	0.209348	0.745913	24.0163	13.501	10605.2	3060.44	0.28858	10229	8727	7358	5701	8182	11797	6553	13838	13815	16736	10921	11342	9510	13188	10153	11647	10606.1
unknown1255	0.235786	0.556281	24	12	937.27	0.450916	1	24.9858	12	5250.75	0.344615	0.95324	24.4929	12.0049	4263.58	1146.86	0.268991	4200	3384	2733	2075	3854	5526	3084	5832	5507	6662	4125	4709	3275	5533	3843	4174	4282.25
unknown1261	0.235786	0.556281	24	12	1842.9	0.817588	1	20.2759	12	13709.5	0.510129	1	22.1379	12.0855	11234.9	2816.73	0.250713	14332	9657	8356	5231	9746	12166	7757	15129	15299	17296	10484	11759	8709	11218	8382	11732	11078.3
unknown1265	0.105571	0.365115	24	12	876.105	0.375407	1	20	12	5244.75	0.167569	0.663735	22	12.1	3465.06	1915.35	0.552761	3845	2946	1546	1397	3029	3409	1977	4072	6402	7854	3241	3482	2457	2789	1730	3457	3352.06
unknown1271	1	1	18	9	277.009	0.930258	1	20	6	3923	0.997509	1	19	7.6	3484.53	383.591	0.110084	3513	3276	3154	2624	3184	3936	3276	5296	4068	3246	2906	3154	3234	3210	2770	3699	3409.12
unknown1276	0.380147	0.737824	24	12	5734.81	0.54696	1	21.995	12	49869.2	0.534488	1	22.9975	12.0228	42450.8	8671.07	0.204262	44616	40559	29531	30902	37130	39298	36473	60804	53703	54707	43383	47684	39754	43505	35288	37484	42176.3
unknown1281	0.235786	0.556281	18	9	2316.66	0.588505	1	23.52	6	13561	0.412815	1	20.76	7.83796	11539.9	2498.91	0.216545	12021	9412	8917	6675	11330	14977	8832	19105	13293	13466	10778	12001	7495	12511	8696	9524	11189.6
unknown1282	0.105571	0.365115	18	12	1810.19	0.495851	1	20.9501	12	9359	0.206764	0.743198	19.4751	12.0692	7103.85	2559.79	0.360338	6698	6878	3929	2969	7175	6769	4687	10403	10697	13416	6252	7071	5380	6520	3868	6403	6819.69
unknown1285	0.873774	1	24	18	287.616	0.997445	1	22.5575	17.9999	4720.5	0.991371	1	23.2788	18.0173	4414.27	263.909	0.0597854	4438	5353	3550	4117	3319	5007	3518	4420	4846	5038	4138	4110	3623	4506	5160	5593	4421
unknown1286	0.235786	0.556281	24	12	825.901	0.463901	1	20	12	6137.75	0.351433	0.966356	22	12.1	4466.23	1668.23	0.373522	5616	2767	3608	2524	3771	4721	2128	4894	5877	8668	5232	4774	2629	4970	3667	4039	4367.81
unknown1287	0.587657	0.97978	24	15	513.006	0.998991	1	28	6.00003	3763.75	0.899747	1	26	10.9107	3758.91	67.0223	0.0178302	3027	2749	3016	2902	3511	5923	2600	3021	3119	4426	3557	3850	2531	8285	4443	3096	3753.5
unknown1294	0.0787266	0.310786	18	9	1294.71	0.337823	1	24.8451	12	7622	0.123058	0.548651	21.4225	10.5291	6883.26	1090.48	0.158425	6085	6626	5412	4041	7121	8996	6544	7458	6607	8343	6521	9017	6131	6592	5523	7233	6765.62
unknown130	0.139706	0.411743	24	0	409.415	0.579511	1	24.0327	17.9999	3104.5	0.284481	0.88282	24.0163	21.002	2835.97	458.494	0.161671	2820	3021	2808	4210	2141	2798	2384	2546	2144	3270	2442	2368	2947	2627	3775	3069	2835.62
unknown1302	0.105571	0.365115	24	6	3887.32	0.339265	1	23.52	5.99998	27388.2	0.155062	0.633581	23.76	6.0006	22795.4	4027.22	0.176668	29534	23747	22003	18456	23207	31355	21802	33189	22033	21045	21721	22472	16550	23791	16080	17239	22764
unknown1309	0.182589	0.483038	24	6	1007.27	0.929696	1	22.3291	5.99998	5113.5	0.470793	1	23.1646	6.0078	4213	483.149	0.114681	5766	4482	5004	3666	4617	8162	4037	3638	3126	4175	2993	3644	1959	6824	2728	2380	4200.06
unknown1311	1	1	18	15	892.369	0.95142	1	28	12	7003.5	0.9988	1	23	14.5119	6648.54	2593	0.39001	16119	9676	5323	6712	6558	5537	5309	6502	6679	9068	5880	6387	3672	5996	1745	5088	6640.69
unknown1315	0.105571	0.365115	24	15	1340.5	0.500864	1	20.7529	12	6757.75	0.208323	0.745143	22.3765	13.462	4720.88	2454.24	0.519869	6187	3616	1510	1915	4388	2753	3160	5234	7117	9867	4513	5534	6924	2997	3585	5305	4662.81
unknown1318	0.0787266	0.310786	24	12	1002.68	0.405244	1	23.3952	12	5094.5	0.141812	0.603665	23.6976	12.002	4176.9	1180.11	0.282533	4282	3084	2856	3322	4141	4658	2913	6369	5070	5539	5340	4429	2929	4805	3486	3422	4165.31
unknown1322	0.587657	0.97978	18	15	3713.72	0.685663	1	20	12	29376	0.769195	1	19	13.6167	22477.4	6730.8	0.299447	29518	22086	17621	14557	17843	24045	15030	21597	35203	37372	23016	21913	17294	21637	15550	24314	22412.2
unknown1324	0.587657	0.97978	18	15	791.429	0.983853	1	20	12	6053	0.894941	1	19	13.6167	5033.28	1281.42	0.254589	5199	6876	4285	4164	4038	5111	3171	4521	5801	8842	5045	4524	4842	6412	3119	4384	5020.88
unknown1326	0.235786	0.556281	24	12	1709.08	0.729852	1	20.0911	12	12516	0.474922	1	22.0456	12.0951	10249.8	2586.24	0.252321	11705	9726	5916	7015	8439	8991	7913	15453	14389	14748	10314	10613	10246	8426	7830	9878	10100.1
unknown1333	0.873774	1	24	6	818.123	0.739049	1	28	6.63e-05	4624	0.92817	1	26	3.25003	3769.7	150.931	0.0400379	6002	4286	4787	3421	4068	5340	2718	4088	3678	4920	3614	2591	1834	4384	1776	2769	3767.25
unknown1336	1	1	24	0	215.668	1	1	28	5.99998	5516.75	1	1	26	2.7857	5450.7	660.346	0.121149	4751	5983	4399	5831	4124	4488	5739	7716	6166	3881	4734	5816	6682	3662	6278	7027	5454.81
unknown135	0.719948	1	24	18	482.247	0.997936	1	28	17.9999	3374	0.956016	1	26	18.1071	2994.59	62.7425	0.020952	2601	2414	4178	1455	2408	4167	2271	2485	3156	3689	2447	3093	2677	3945	3555	3319	2991.25
unknown1350	0.719948	1	18	12	1251.93	0.97899	1	20	12	12582	0.951376	1	19	12.0333	11133	1620.76	0.145582	14054	11422	9181	6642	9753	12524	8416	12737	14134	15014	10898	10282	9027	11297	9162	10521	10941.5
unknown1353	1	1	24	6	1376.03	0.988915	1	28	6	12581.2	0.999938	1	26	6.03571	11477.3	993.17	0.0865335	16230	15833	9687	7459	10231	14193	10527	15374	13916	11860	8590	11953	9212	12043	8104	9506	11544.9
unknown1354	0.380147	0.737824	24	9	1037.86	0.718606	1	20.8511	6.00001	6742.75	0.62766	1	22.4255	7.43132	5244.09	1420.89	0.270951	3931	3257	5908	4545	5433	6088	5102	10348	7198	3597	5669	5002	1967	3617	5241	5492	5149.69
unknown1358	1	1	18	9	3087.94	0.995605	1	24.0327	6	28128.5	0.99999	1	21.0163	7.87756	26089.2	2954.42	0.113243	28287	25393	22138	17101	18670	34972	21535	37337	31765	30598	21785	26238	18776	27417	20059	29197	25704.2
unknown136	0.235786	0.556281	24	12	7400.58	0.612231	1	24.0327	12	44299.5	0.423753	1	24.0163	12	35836.1	9926.42	0.276995	39449	29146	20927	20104	32902	33481	26250	59490	50821	52186	36451	37740	36800	37646	27536	32533	35841.4
unknown1370	0.0787266	0.310786	18	9	3585.03	0.845044	1	27.6489	6	7977.25	0.246826	0.812372	22.8245	8.18264	5581.32	2525.57	0.452505	867	1633	2114	515	4873	10974	2250	13812	6254	7150	5542	6344	1907	6164	11850	4894	5446.44
unknown138	0.719948	1	24	18	129.401	0.825028	1	28	6.00002	1204.25	0.903388	1	26	25.5357	1260.88	182.667	0.144872	834	1085	1213	1288	999	1305	1510	1003	1028	1029	1329	1260	1122	1634	1641	1721	1250.06
unknown1393	0.235786	0.556281	24	12	2053.44	0.741425	1	20	12	13603.8	0.479702	1	22	12.1	10984	3064.98	0.279041	12927	10537	6824	7261	8975	10035	7783	16850	14288	16116	11254	12757	8811	12314	7529	8590	10803.2
unknown1394	0.235786	0.556281	24	12	986.237	0.65251	1	20.6557	12	7871.5	0.441828	1	22.3279	12.0677	6643.96	1343.43	0.202204	7560	5550	4625	5087	5597	6650	4864	9174	9129	8229	7081	7047	6432	6724	5083	6382	6575.88
unknown1397	0.0787266	0.310786	24	9	719.835	0.333945	1	24.8451	5.99999	4674.75	0.121949	0.544673	24.4225	7.5282	3750.06	801.558	0.213745	5252	3955	3335	2568	5142	4961	3122	5474	3455	4918	3315	3796	2630	3190	2548	2572	3764.56
unknown1398	0.139706	0.411743	24	15	2426.79	0.178764	1	28	18	8582.24	0.117128	0.530688	26	16.4821	6072.07	795.378	0.13099	3492	3905	3638	1805	4213	7445	3106	7730	8981	7023	5284	6472	6200	9234	8238	10657	6088.94
unknown1400	0.873774	1	18	12	56.5685	0.98373	1	26.8085	5.99999	4248	0.989641	1	22.4043	9.97522	4026.85	330.257	0.0820138	3875	4615	3970	3800	4269	5049	3925	3749	3978	4307	4745	3861	1989	4920	3779	3220	4003.19
unknown1401	0.235786	0.556281	24	12	1152.58	0.688868	1	21.7778	12	8309	0.45764	1	22.8889	12.0284	6902.38	1689.28	0.244739	7913	6350	3921	5007	5938	6859	5475	10254	9829	9323	6819	7265	6932	5879	5198	6533	6843.44
unknown1415	0.475047	0.855944	24	12	3738.83	0.999997	1	23.52	12	20864.2	0.828643	1	23.76	12.0012	16751.2	3232.16	0.19295	5824	37424	4934	2924	22469	12784	11285	14757	16602	6148	42378	18329	41560	5359	12072	12767	16726
unknown1417	0.139706	0.411743	24	6	580.181	0.355133	1	23.0287	6	2190.75	0.19863	0.724674	23.5144	6.00256	1682.94	215.272	0.127914	1742	2705	2947	937	1761	3075	1634	2293	864	1413	1324	1234	1096	1401	1501	946	1679.56
unknown1418	0.719948	1	24	12	898.026	0.841675	1	20	12	16399.8	0.909512	1	22	12.1	15026.7	1444.24	0.0961118	13816	15028	13119	14738	11888	15452	13486	18090	17178	14343	16616	17462	15002	15355	13971	13520	14941.5
unknown1420	0.301037	0.636029	24	12	3513.08	0.495488	1	20	12	26436.8	0.432973	1	22	12.1	19090	7244.82	0.379509	24495	10420	15661	10907	15931	20105	8698	20781	25501	38266	21940	20040	11741	20979	15452	17684	18662.6
unknown1423	0.105571	0.365115	18	15	913.582	0.906289	1	20	12	7137.75	0.320211	0.930432	19	13.6167	5092.69	2149.69	0.422112	5950	5680	2551	5828	5288	3066	3663	4993	5984	6013	12109	4445	3670	3459	4383	4068	5071.88
unknown1424	1	1	18	6	7073.19	0.992532	1	20	6.00001	64471.2	0.999972	1	19	6.01667	53473	10538.3	0.197076	37312	41456	78614	40771	41242	94966	41031	80646	51954	35440	40271	41946	30927	70661	59274	48625	52196
unknown1428	0.0787266	0.310786	24	6	1184.4	0.164124	1	28	6.63e-05	5441.99	0.0691129	0.421166	26	3.25003	4179.01	227.42	0.0544196	6132	5675	5816	4145	5367	4283	4375	3962	3535	5063	3881	2996	2147	3972	2480	2976	4175.31
unknown1434	0.475047	0.855944	24	6	1350.4	0.557809	1	28	6.63e-05	9671.49	0.616908	1	26	3.25003	7634.87	841.324	0.110195	12972	7907	9807	8000	8616	8470	7252	7121	6073	9266	7897	5662	3396	8438	5709	5353	7621.19
unknown1435	1	1	18	9	317.137	0.999927	1	20	6	3356.75	1	1	19	7.6	3083.72	296.146	0.0960353	2802	3274	2678	2108	3967	4544	2562	2354	2742	3726	3156	2619	2420	4010	2700	2746	3025.5
unknown1441	0.139706	0.411743	24	3	2080.31	0.243513	1	28	6.63e-05	8698.24	0.149036	0.620213	26	1.62503	5992.32	435.513	0.0726786	10749	8102	8792	7150	6968	7542	5961	4023	4243	7821	5449	3897	2399	6012	3695	3206	6000.56
unknown1443	0.301037	0.636029	24	15	1902.82	0.807159	1	21.253	12	26850.8	0.586749	1	22.6265	13.4585	22812.9	5285.43	0.231686	25118	21387	15093	17496	19486	21196	17916	33676	30680	30888	21903	23932	20142	23497	19070	21758	22702.4
unknown1445	1	1	18	9	1329.18	0.999055	1	28	17.9999	7804.5	1	1	23	13.1428	6876.28	572.989	0.0833283	6978	8467	2655	2744	5342	6964	5200	9624	11205	8758	4602	6082	11714	3153	4630	11721	6864.94
unknown1455	0.139706	0.411743	24	12	1566.24	0.380007	1	22.1053	12	7187	0.208948	0.745746	23.0526	12.0203	5228.03	2378.57	0.454965	5139	4599	2471	2527	5241	4345	3751	9120	8318	9107	4700	6623	4067	5104	2911	4484	5156.69
unknown1459	0.139706	0.411743	24	15	888.126	0.914258	1	28	6.00001	2983.75	0.390573	1	26	10.9107	2543.84	136.608	0.0537016	548	496	1318	287	1842	3820	1487	4786	2955	1923	2538	2610	1589	4686	8004	1989	2554.88
unknown146	0.122638	0.411743	24	15	592.555	0.352829	1	28	12	3750	0.179152	0.681022	26	13.6964	3264.83	467.122	0.143077	1976	3799	1581	2590	2932	3306	2978	3446	4228	4186	3159	3427	4398	3159	3258	4099	3282.62
unknown1461	1	1	18	9	386.964	0.998055	1	28	6	2122.25	0.999998	1	23	8.21428	1973.13	67.3191	0.034118	1311	1695	1553	850	1470	2568	1179	3272	1606	2112	1904	1856	1015	2854	4155	2121	1970.06
unknown1463	0.0787266	0.310786	18	12	20333.2	0.89081	1	20	12	132878	0.256495	0.830484	19	12.0333	93206.1	47902.6	0.513943	140886	85056	56307	41055	75370	78470	47595	143896	105407	235143	101809	89155	57391	51373	23632	68210	87547.2
unknown1468	0.301037	0.636029	18	12	1264.66	0.987544	1	28	12	12862	0.657914	1	23	12.5952	11041.8	3062.49	0.277353	18734	6735	11301	11655	9568	10395	11700	13781	13482	17078	6661	14227	3522	8694	8643	9226	10962.6
unknown1475	0.719948	1	24	3	3853.73	0.59181	1	28	6.63e-05	15028.2	0.789574	1	26	1.62503	10338.3	619.715	0.0599434	17791	8826	11806	21690	10337	5781	17536	11179	10358	8182	6440	11506	2093	3072	12257	6747	10350.1
unknown1478	0.587657	0.97978	24	9	1053.59	0.874115	1	24.0327	12	9294.25	0.85587	1	24.0163	10.499	8406.35	1200.22	0.142776	9720	8100	6512	6461	10599	10805	7094	7948	7657	10582	9495	9443	6518	9982	6164	7435	8407.19
unknown1487	0.182589	0.483038	24	12	768.979	0.603282	1	22.6735	12	5250.75	0.353137	0.967227	23.3368	12.0097	4352.93	1113.69	0.255849	4196	4585	2805	2911	3975	3730	3748	6913	5696	4661	4835	5811	4372	4275	2961	3794	4329.25
unknown1490	0.475047	0.855944	24	0	488.611	0.844545	1	24.0327	17.9999	4363	0.767613	1	24.0163	21.002	4016.23	549.307	0.136772	3339	5971	4455	4015	3294	4181	3606	3293	4482	3070	3976	3119	3907	3729	4957	4859	4015.81
unknown1493	0.873774	1	18	12	6530.48	0.995438	1	20	12	51931.5	0.991129	1	19	12.0333	41760.5	12150.6	0.29096	65668	36711	31578	19566	32388	50348	24071	52518	51136	87342	33151	36097	27236	39134	26282	31976	40325.1
unknown1495	0.587657	0.97978	18	15	501.339	0.999233	1	20	12	3342.25	0.899823	1	19	13.6167	3062.76	665.54	0.217301	6318	2336	2296	2759	2498	3106	1692	2205	3369	3246	3709	3045	2798	4168	2899	2457	3056.31
unknown15	1	1	18	12	341.002	0.923584	1	20	12	5763.5	0.997003	1	19	12.0333	5344.05	451.705	0.0845248	5099	5793	5192	4717	4741	5862	4472	5458	5590	6605	5655	5204	4727	5390	4917	5229	5290.69
unknown1501	0.587657	0.97978	24	6	409.238	0.948337	1	20	6	5947.25	0.883125	1	22	6.05	5013.96	883.952	0.176298	6319	5519	3972	3328	4308	7288	4201	7992	5746	3952	3933	5260	3691	4834	3913	5090	4959.12
unknown1505	0.719948	1	18	12	3813.43	0.947736	1	20	12	19889.5	0.943141	1	19	12.0333	16953.5	3383.94	0.199601	20039	16242	11533	12408	13204	15464	11720	27251	21816	22828	17150	17764	13369	18324	11548	14200	16553.8
unknown1506	0.380147	0.737824	24	12	3960.51	0.722711	1	26.4865	12	19954.8	0.629681	1	25.2432	12.0292	15796.2	4614.14	0.292105	12591	10004	9921	6579	11559	25540	6753	24824	27462	19515	15881	16961	8697	22711	17912	18881	15986.9
unknown1507	1	1	24	6	8227.89	0.999904	1	23.3952	5.99999	115570	1	1	23.6976	6.00097	108584	6358.59	0.058559	113602	133686	117316	72058	105680	135863	96529	124206	99050	124927	102966	102717	81102	119736	105120	101791	108522
unknown1510	0.380147	0.737824	24	9	673.873	0.705857	1	23.7736	6	4718	0.621328	1	23.8868	7.49306	4001.67	848.162	0.211952	4467	3950	3153	2557	3971	5014	3145	6742	5139	4676	3719	4042	2814	4174	3101	3297	3997.56
unknown1515	0.719948	1	24	15	1185.46	0.444262	1	20	12	6289.25	0.684443	1	22	13.475	4654.53	2102.06	0.451615	5140	5178	1974	3506	3177	3470	2949	5103	8054	7174	5034	4895	5801	2992	3613	5508	4598
unknown1516	0.587657	0.97978	18	9	6931.24	0.991099	1	28	5.99999	24940	0.897259	1	23	8.21428	19234.7	4508.55	0.234396	9208	10665	11664	6098	15461	32633	10191	41475	19568	16378	18841	20706	10516	33977	29962	17130	19029.6
unknown152	1	1	24	18	2327.8	0.996548	1	28	17.9999	13783.2	0.999994	1	26	18.1071	12085.9	349.36	0.0289063	10161	8794	17217	6491	9967	16854	9091	9449	13305	15098	9181	12337	10721	16175	14234	14003	12067.4
unknown1527	0.475047	0.855944	24	6	1913.43	0.534108	1	28	12	5975	0.601712	1	26	8.82143	6043.28	199.364	0.0329893	9045	10229	8106	8095	3392	3670	9713	6568	7034	6770	3575	6521	5362	4097	1642	2586	6025.31
unknown1533	1	1	18	9	1449.57	0.993824	1	23.9024	12	12355	0.999981	1	20.9512	10.497	11265	1487.01	0.132003	13406	12479	7780	6972	9657	16747	9958	11204	13468	16602	10636	8714	10319	11241	7913	10124	11076.2
unknown1536	0.587657	0.97978	24	12	3762.16	0.767896	1	20.1831	12	23851.8	0.810333	1	22.0915	12.0902	18075.3	6309.46	0.349066	22486	15953	10452	6621	13934	18164	10274	27626	26014	33188	15456	20749	13018	18711	11443	19386	17717.2
unknown1539	1	1	18	6	490.025	0.999412	1	20	5.99999	7496	1	1	19	6.01666	6408.26	1127.06	0.175876	7923	7207	3814	4388	4803	7878	5372	11931	7921	6544	4194	5370	6175	3986	4286	8555	6271.69
unknown154	0.587657	0.97978	18	12	182.434	0.981578	1	20	12	3197.25	0.894207	1	19	12.0333	2996.32	222.307	0.0741931	2901	3189	3028	2746	2561	3243	2501	3199	3310	3413	2981	3085	2511	2878	2918	3057	2970.06
unknown1540	0.719948	1	24	9	1819.74	0.983948	1	27.1385	6	15842.2	0.952615	1	25.5692	7.62076	14496.7	1730.46	0.119369	21119	14197	13102	11671	18267	16639	11487	16976	16060	22008	13895	10833	10585	14569	8981	13419	14613
unknown1542	1	1	24	12	264.281	0.999942	1	25.2722	6	3957.75	1	1	24.6361	9.08352	3668.07	288.451	0.0786385	2713	4358	3833	3678	3537	4987	3800	3507	3402	4055	3912	3810	2055	5582	3092	2503	3676.5
unknown1545	1	1	18	3	159.276	0.999999	1	20.7529	6	3299	1	1	19.3765	4.41573	3116.56	165.312	0.0530431	3117	3772	3541	2129	2930	4009	2975	3282	2983	3358	2813	2914	1905	3589	3141	3361	3113.69
unknown1546	1	1	18	12	145.487	0.996171	1	23.9024	12	1107	0.999993	1	20.9512	12.2429	981.516	120.703	0.122976	800	1047	708	800	893	642	1048	1234	1394	870	1106	1058	1446	491	773	1241	971.938
unknown155	0.587657	0.97978	24	12	1741.96	0.797515	1	21.5648	12	16234	0.823851	1	22.7824	12.0344	13998.1	2569.63	0.183571	16099	13153	8983	10559	12887	13117	11442	19266	18463	18849	13612	14012	14016	13633	11528	12787	13900.4
unknown1550	0.139706	0.411743	24	6	1509.5	0.368556	1	28	5.68e-05	5688.5	0.204227	0.736431	26	3.25003	4097.81	296.348	0.0723187	6462	6356	4867	5069	3400	8246	4644	2494	3351	2769	2824	4188	2388	4443	2000	2141	4102.62
unknown1554	0.139706	0.411743	24	12	3016.87	0.481035	1	24.0327	12	13619.8	0.248655	0.815508	24.0163	12	11078.5	3800.88	0.343087	10570	9506	7271	6593	10589	14891	7950	18503	17165	16019	10109	11186	8464	12229	7231	9012	11080.5
unknown1555	0.0579045	0.266686	24	12	1729.58	0.339147	1	23.9024	12	8238.25	0.0968217	0.487279	23.9512	12	6702.32	2198.59	0.328035	7313	5444	4912	3301	6776	7917	5289	10709	8845	9890	6310	7908	6232	5546	4907	5882	6698.81
unknown1558	1	1	24	12	665.034	0.997494	1	23.2718	5.99999	5412.75	0.999997	1	23.6359	8.9559	4779.19	581.026	0.121574	5678	4660	3956	3700	4424	6759	3433	7035	4545	5080	5016	5183	2807	7088	3379	3567	4769.38
unknown156	1	1	24	0	122.329	0.999834	1	24.1644	6.63e-05	993.749	1	1	24.0822	3.3e-05	918.502	188.402	0.205119	1236	543	1402	794	967	1295	637	414	593	994	786	820	685	1806	1000	716	918
unknown1562	0.719948	1	24	12	521.491	0.669726	1	20	12	6563.75	0.833892	1	22	12.1	5389.22	1165.85	0.21633	6158	5386	3426	3631	4579	5972	3840	5709	7424	8461	4975	5395	4870	5566	4459	5276	5320.44
unknown1569	1	1	18	9	2920.88	0.991227	1	24.0327	12	26883.2	0.999961	1	21.0163	10.501	24567.2	3304.48	0.134508	28993	27248	17349	15069	21254	36736	21546	24927	29188	35667	23612	19066	22460	24853	16364	22169	24156.3
unknown1574	1	1	18	0	586.899	0.999987	1	21.0501	5.99997	5201.25	1	1	19.5251	2.78264	3743.49	1044.93	0.279132	2968	2387	11501	1410	1718	15702	1692	1693	1810	4842	1959	1453	819	9089	1171	1079	3830.81
unknown1576	1	1	18	6	998.788	1	1	20	6	10074.5	1	1	19	6.01667	8779.59	1543.92	0.175853	9908	13233	3046	3185	6177	11474	5082	17565	11405	10212	4921	5585	12396	4183	4208	14900	8592.5
unknown1579	0.139706	0.411743	24	6	985.707	0.648167	1	28	6.63e-05	5208.5	0.308045	0.908722	26	3.25003	4195.95	621.715	0.14817	6406	7297	3684	3447	3430	5397	3228	7519	4294	4302	3410	2872	2883	2774	2960	3394	4206.06
unknown158	0.235786	0.556281	24	15	942.573	0.537182	1	28	17.9999	2946.25	0.388371	1	26	16.4821	2263.9	446.632	0.197284	1225	1489	934	1217	1421	2466	1167	3882	2705	3419	2139	2525	1313	3280	4149	3043	2273.38
unknown1585	0.873774	1	24	3	2097.99	0.883745	1	28	12	6881.25	0.971821	1	26	7.19643	7266.13	1210.49	0.166594	10912	4997	17771	10502	3847	6330	8712	6324	12195	3360	4816	7154	2819	4545	5732	4658	7167.12
unknown1586	0.719948	1	24	12	22004.5	0.87147	1	24.2975	12	104736	0.919882	1	24.1488	12.0004	88793.5	23043	0.259512	88594	60760	86008	48639	82654	123758	58129	135594	108623	131861	77145	101315	53543	124666	69789	71419	88906.1
unknown1587	0.182589	0.483038	24	6	3576.9	0.506211	1	28	6.68e-05	12518.7	0.31253	0.91818	26	3.25003	8732.63	149.921	0.017168	16228	6557	9286	18004	9618	5048	15112	10486	8925	7578	5257	9589	1278	2628	9023	5066	8730.19
unknown1593	1	1	18	9	324.208	0.995142	1	24.7059	12	3132.75	0.999988	1	21.3529	10.5239	2949.68	257.336	0.087242	3028	3142	2187	2192	2453	3517	2310	4074	3631	3053	2648	3199	2463	3375	2875	2592	2921.19
unknown1598	0.139706	0.411743	24	15	1411.92	0.612748	1	22.3291	12	8383.5	0.296023	0.897067	23.1646	13.4634	6660.52	2090.17	0.313815	7022	5835	3695	4209	5271	5275	4343	10245	9962	9802	6495	7275	7745	6734	5664	6538	6631.88
unknown1600	0.182589	0.483038	24	12	6646.63	0.572481	1	23.1496	12	36157.2	0.340585	0.949516	23.5748	12.0039	28929.9	9295.63	0.321316	32526	25814	18460	14835	27030	29221	22028	47794	40298	44568	28315	31448	23385	29864	19446	25802	28802.1
unknown1604	0.873774	1	24	12	2541.7	0.828671	1	23.2718	12	25665	0.957849	1	23.6359	12.0028	22416.4	3574.96	0.159479	23142	22407	16513	15650	20416	21121	18196	31304	29837	29528	21712	21583	22443	20053	20176	23907	22374.2
unknown1609	0.0787266	0.310786	24	12	2778.58	0.360187	1	23.7736	12	13975.2	0.129387	0.569886	23.8868	12.0003	11316	3762.26	0.332472	10107	10521	7534	7535	11301	14268	8468	17502	17009	16173	11255	11464	8656	12539	7633	8869	11302.1
unknown161	0.719948	1	18	15	1618.57	0.999998	1	28	12	11611.8	0.956505	1	23	14.5119	9909.72	3933.7	0.396953	17053	11201	10263	7474	7800	10667	6916	10222	11844	15664	9500	9439	8781	9054	5843	6644	9897.81
unknown1610	0.587657	0.97978	24	6	13406	0.963776	1	26.4865	6.63e-05	96756.7	0.888356	1	25.2432	3.15544	82404	10568.8	0.128256	98475	153653	68767	66132	88836	84082	77472	111623	109185	62769	51370	61616	87356	49788	58533	89918	82473.4
unknown1611	1	1	24	6	858.604	1	1	20	6	6976.5	1	1	22	6.05	6252.74	414.991	0.0663694	7233	4836	8175	4422	5877	12361	5807	3861	3013	7235	5764	5517	2649	14950	3610	4322	6227
unknown1613	0.301037	0.636029	24	9	758.018	0.74756	1	20.464	6.00002	9165.5	0.560687	1	22.232	7.4277	7824.61	822.784	0.105153	10227	7391	6095	7155	8654	10621	7784	9603	5604	7946	7939	7582	5690	9614	6085	6224	7763.38
unknown1625	1	1	18	9	844.462	0.993707	1	24.0327	12	6535.5	0.99998	1	21.0163	10.501	6010.05	717.167	0.119328	6287	5931	4684	4227	3949	8046	4855	8519	7505	7218	5118	6301	4422	6399	4391	6882	5920.88
unknown1626	1	1	18	12	374.413	0.999831	1	20	12	3980.25	1	1	19	12.0333	3660.18	359.146	0.0981225	3946	4737	2710	2502	3306	4562	3432	3139	4495	4476	4018	2932	3807	3460	2694	3668	3617.75
unknown1629	0.0787266	0.310786	24	9	1034.85	0.528894	1	24.4321	6.00001	6818.5	0.173995	0.671823	24.2161	7.51399	5218.72	1422.33	0.272544	5799	3673	6744	4252	6098	6455	4069	10652	5132	4917	5683	6086	1754	3504	5443	3449	5231.88
unknown1632	1	1	24	0	412.597	0.999998	1	20	6.63e-05	3266.5	1	1	22	3.65e-05	3098.08	380.093	0.122687	3102	3271	3935	2758	2537	5314	2500	2366	2664	2600	3178	2233	1423	5463	4335	2367	3127.88
unknown1638	0.235786	0.556281	24	15	1059.6	0.438726	1	25.7143	12	6227.5	0.338134	0.945762	24.8571	13.5679	4976.39	1540.82	0.309627	4214	4151	2578	2753	4959	4126	4200	6992	6443	6577	4111	7779	7555	4690	3610	5276	5000.88
unknown1639	0.105571	0.365115	24	12	1901.76	0.323569	1	23.52	12	11051.8	0.149506	0.620213	23.76	12.0012	8701.73	2535.71	0.291403	8610	7180	5048	5009	7263	8561	7086	12749	13356	12651	8535	9665	8906	9365	6616	8311	8681.94
unknown164	1	1	24	0	2041.77	0.991933	1	27.6489	6.63e-05	23914.5	0.999967	1	25.8245	3.1e-05	24900	4716.47	0.189416	16605	28072	23430	27551	18105	20831	27841	27849	25297	18732	18205	26297	25093	21111	35232	34536	24674.2
unknown1653	0.0787266	0.310786	24	6	3557.1	0.423585	1	20.464	5.99998	14013.8	0.146754	0.615002	22.232	6.03818	9093.88	3939.41	0.433193	11566	9594	11348	4185	8697	12601	10466	24291	5917	5592	4196	10241	5507	4859	2924	10039	8876.44
unknown1655	0.587657	0.97978	24	12	735.391	0.831313	1	20	12	5474.5	0.838488	1	22	12.1	4560.52	1058.71	0.232147	5009	4441	3193	3451	3550	4418	3191	6880	6043	5817	4747	5291	3510	5399	3328	3701	4498.06
unknown1663	1	1	24	18	186.676	0.999885	1	20.3695	12	3966.75	1	1	22.1848	14.854	3660.69	245.896	0.067172	3640	3698	3158	3407	3102	3518	2733	4943	5056	4231	3337	3243	3143	4091	3355	3945	3662.5
unknown1668	1	1	24	6	1495.88	0.962565	1	26.6465	6	14157.5	0.99929	1	25.3233	6.01643	12539.9	1675.71	0.13363	16854	14572	12781	8333	11957	17869	9671	17133	13916	14924	10804	11973	7006	14007	7714	12318	12614.5
unknown1675	0.719948	1	18	12	1006.92	0.999385	1	28	12	12028	0.95636	1	23	12.5952	10404.5	2416.55	0.232261	15407	6521	11579	11897	8950	9696	10505	11463	12607	15140	6531	13834	4391	8312	9310	9329	10342
unknown1677	1	1	24	6	540.583	0.999561	1	24.2975	6	4320.75	1	1	24.1488	6.00023	3839.98	376.07	0.0979354	4616	3962	4750	2715	4256	6355	3108	3564	3078	4837	3465	3386	1650	5653	3320	2754	3841.81
unknown1685	0.0579045	0.266686	24	12	10202.7	0.26586	1	20	12	51882	0.0796473	0.449082	22	12.1	32662.8	20822.7	0.637506	37451	27498	14151	12403	29093	30141	14718	40647	62399	73709	35506	35914	18730	23756	16766	30068	31434.4
unknown1686	1	1	18	12	395.98	0.995342	1	20	12	4986.75	0.999989	1	19	12.0333	4455.76	625.433	0.140365	5342	4893	3810	3023	4301	4366	3286	5415	5294	6274	4703	3676	3496	3990	3571	4670	4381.88
unknown1691	0.0579045	0.266686	24	12	2583.59	0.519646	1	23.52	12	10658.8	0.135512	0.584565	23.76	12.0012	7909.73	3697.47	0.467459	9643	6075	3499	3096	8792	6555	5928	15461	12043	14002	6723	9867	5779	7290	5101	6240	7880.88
unknown1694	0.301037	0.636029	24	9	3076.09	0.997927	1	20	5.99999	21507.8	0.661689	1	22	7.42499	18406.8	2405.4	0.13068	19268	15760	18311	15620	25071	25469	15378	20113	12539	22196	20045	16308	10012	31323	12005	11861	18204.9
unknown1704	0.105571	0.365115	24	6	2077.13	0.481435	1	26.4865	6.63e-05	9898.75	0.202253	0.731201	25.2432	3.15544	8437.23	1658.62	0.196583	12808	11588	8722	6477	10079	11051	8350	9683	7337	7098	7249	7755	5121	10723	5838	5291	8448.12
unknown1706	0.139706	0.411743	24	15	236.881	0.562047	1	28	17.9999	2309.5	0.27831	0.869837	26	16.4821	2059.91	57.6677	0.0279952	1944	1836	1642	1804	1576	2066	1984	2154	2081	2729	1689	2196	2225	2049	2263	2701	2058.69
unknown171	0.0787266	0.310786	18	9	2178.77	0.368588	1	26.6465	12	5620.5	0.131736	0.574492	22.3233	10.6073	4520.57	1267.64	0.280416	2747	1951	2622	1969	4186	5977	2879	7269	5833	7117	3885	5647	2827	7185	4242	4567	4431.44
unknown1713	0.0787266	0.310786	24	9	35571	0.524459	1	24.2975	6	180079	0.172883	0.671823	24.1488	7.50953	139851	38552	0.275665	188545	159313	112177	70101	159091	222851	118693	219680	158564	196441	112398	131351	95735	145236	61685	89682	140096
unknown1716	0.0579045	0.266686	24	3	853.478	0.336719	1	28	7.5e-05	3955.99	0.0962686	0.486206	26	1.62503	2548.29	774.419	0.303898	5289	2999	5302	2234	2151	2500	1538	5130	2246	1637	1255	1724	828	1830	2175	1700	2533.62
unknown1717	0.139706	0.411743	24	12	2441.46	0.48696	1	23.9024	12	10238.8	0.250885	0.81706	23.9512	12.0001	7376.46	3309.54	0.448662	6325	4572	4395	2805	5344	9479	3472	13849	13848	10756	7356	8995	3890	7270	6305	9278	7371.19
unknown1719	1	1	24	6	649.831	0.999976	1	28	12	5560.75	1	1	26	8.82143	5116.03	420.504	0.0821934	6593	5893	6814	3311	5692	7879	3434	4232	4497	7995	5435	4316	1939	7725	3062	3646	5153.94
unknown1722	1	1	18	0	745.114	0.974354	1	23.9024	17.9999	4334.49	0.999668	1	20.9512	18.3644	3579.4	731.07	0.204244	2459	4089	4105	5689	2545	2225	4642	2576	2825	2060	3894	4381	3510	2188	6307	5333	3676.75
unknown1723	1	1	18	3	4001.69	0.999717	1	20	6	75380.5	1	1	19	4.43333	72262.6	4197.4	0.0580853	69634	82442	77611	58912	79729	74873	83866	63054	65776	68794	65113	75712	73834	73819	75620	66518	72206.7
unknown1726	1	1	18	12	359.917	0.999422	1	20	12	3927	1	1	19	12.0333	3615.34	246.816	0.068269	3084	4329	2861	3895	2392	2512	3708	4125	4615	3998	3389	3706	3512	2515	3138	5600	3586.19
unknown1728	0.301037	0.636029	24	12	704.278	0.795231	1	24.2975	12	4482	0.581642	1	24.1488	12.0004	3881.56	754.464	0.194371	3096	3307	3936	2651	3772	4756	2442	5535	5043	4758	3569	4558	3243	4675	3143	3680	3885.25
unknown1731	0.587657	0.97978	24	3	1458.41	0.815784	1	27.8233	5.3e-05	7077.49	0.831866	1	25.9117	1.6195	5528.7	1244.23	0.225049	5474	4520	9444	8872	3957	3875	7369	8498	4529	2745	4324	6052	2812	4203	7019	4393	5505.38
unknown175	0.719948	1	18	12	239.356	0.997406	1	28	12	10076	0.95589	1	23	12.5952	9146.46	1540.3	0.168404	9875	13321	8895	6778	7336	9244	9805	10640	10472	13359	8015	8458	7876	5799	6450	9383	9106.62
unknown1753	0.301037	0.636029	24	12	616.774	0.867287	1	22.4427	12	5056.5	0.611699	1	23.2214	12.0135	4332.06	890.397	0.205537	4998	4110	2837	3087	3856	4168	3454	6529	5896	5868	4165	4297	3745	4489	3333	4127	4309.94
unknown1764	0.235786	0.556281	18	9	2128.04	0.791957	1	23.7736	6	17785.2	0.500084	1	20.8868	7.85741	15928.7	2283.61	0.143364	17797	11899	12224	12475	16763	17782	14282	22314	17634	19222	14527	15359	14202	19153	12252	12029	15619.6
unknown1766	1	1	24	6	553.311	0.99999	1	21.6708	6	11152.8	1	1	22.8354	6.01565	10654.9	161.772	0.0151829	9728	15262	8228	11034	10948	8958	12502	12203	8847	8207	10557	12593	11836	9631	10725	9123	10648.9
unknown177	1	1	18	12	5252.21	0.982486	1	20.9501	12	45743.5	0.999846	1	19.4751	12.0692	40484.7	5213.68	0.128782	52304	36099	31123	24033	39218	41967	30316	44438	56993	53969	33322	38690	35591	45783	35635	39013	39905.9
unknown1771	0.0787266	0.310786	24	6	641.346	0.631771	1	28	6.63e-05	3582.75	0.198999	0.724723	26	3.25003	2859.53	520.904	0.182164	4444	5119	2379	2389	2424	3565	2275	5278	2756	3047	2156	1908	1942	1793	2094	2319	2868
unknown1774	1	1	18	3	351.786	0.985077	1	24.1644	5.77e-05	5563.5	0.999888	1	21.0822	1.75687	5017.51	498.8	0.0994118	5241	7456	5105	4452	4558	5295	4689	5402	4851	4588	4736	4071	3894	4277	5801	6462	5054.88
unknown1775	0.235786	0.556281	24	12	488.434	0.759215	1	20	12	4360.75	0.486968	1	22	12.1	3686.16	832.31	0.225793	4212	3433	2392	2793	3099	3288	3176	5494	5210	4850	3562	3821	3139	3504	2990	3230	3637.06
unknown1779	0.182589	0.483038	24	3	471.287	0.54852	1	28	6.31e-05	3140	0.330612	0.936891	26	1.62503	2638.42	322.479	0.122224	3835	2948	3086	2691	2649	3853	2546	2277	2420	2025	2557	2250	1859	3225	2191	1705	2632.31
unknown1785	0.105571	0.365115	24	3	1865.88	0.183683	1	28	6.63e-05	8731.99	0.0958508	0.485517	26	1.62503	6376.57	365.975	0.0573938	10958	8765	8464	6741	7457	8055	5853	5282	5421	7538	5664	4585	3527	5825	3870	4131	6383.5
unknown1787	0.380147	0.737824	18	9	2383.66	0.917681	1	24.4321	6.00001	7353.5	0.716233	1	21.2161	7.90912	5964.55	1594.75	0.267371	2533	7051	4133	2498	8017	7366	5578	8453	7445	1557	8922	7642	6605	2253	6323	5934	5769.38
unknown1793	1	1	24	12	532.098	0.998037	1	24.1644	12	8039.5	0.999998	1	24.0822	12.0001	7616	696.448	0.0914453	6704	7404	8206	6887	6856	8586	6313	10248	9476	7896	6732	8054	5538	8246	7810	6930	7617.88
unknown1798	0.475047	0.855944	18	12	3151.75	0.467031	1	21.8859	12	17198.5	0.555919	1	19.9429	12.115	14100.4	3255.44	0.230876	15250	14453	7266	7533	14046	12560	10276	18147	18977	19480	16634	13703	12972	13947	13895	11141	13767.5
unknown1801	0.139706	0.411743	18	15	970.327	0.935003	1	20	12	6431.5	0.396504	1	19	13.6167	4892.83	1750.83	0.357836	6400	6207	3796	4130	5540	3439	3240	4811	6526	8867	5863	4470	4022	3487	3062	4154	4875.88
unknown1802	0.301037	0.636029	18	6	750.24	0.857026	1	20	6	4107.5	0.607533	1	19	6.01667	3308.97	846.083	0.255694	3124	4215	1815	2010	3638	5289	2753	4750	3012	3006	2501	2784	3543	3386	2222	3255	3206.44
unknown1803	1	1	18	6	173.595	0.999997	1	28	5.99999	5322.75	1	1	23	6.29761	5093.73	403.874	0.0792886	699	5025	5474	5623	5523	6809	5406	3553	5256	4857	5590	4994	2895	7951	7941	3681	5079.81
unknown1811	0.0579045	0.266686	18	15	1298.42	0.991209	1	20	12	5272.25	0.22142	0.771028	19	13.6167	4821.08	1376.97	0.285613	7669	4078	7416	4739	4275	4426	2617	2874	5923	5270	4645	5251	2902	5851	4429	4559	4807.75
unknown1813	1	1	18	9	853.831	0.999998	1	28	5.99999	4892	1	1	23	8.21428	4395.81	609.746	0.138711	4541	4835	1912	1825	2748	4376	2737	9707	6159	6225	3016	3303	7097	2028	2018	7362	4368.06
unknown1814	1	1	18	12	263.928	1	1	20	12	5682.5	1	1	19	12.0333	5466.64	240.833	0.0440551	6160	5461	4472	5739	3866	6781	3619	7017	6602	6538	4483	5107	3473	6474	5030	6189	5438.19
unknown182	0.719948	1	18	12	1301.61	0.983177	1	20	12	25033.2	0.952424	1	19	12.0333	22482.2	3011.79	0.133963	25269	21100	22099	13466	22559	25238	14983	29072	23494	31594	21262	23783	20930	25222	15551	18401	22126.4
unknown1830	0.0579045	0.266686	24	12	1220.29	0.140483	1	26.6465	12	5348.75	0.0472754	0.340066	25.3233	12.0329	4418.15	1228.98	0.278167	2270	2387	3390	3154	5673	5654	4408	4577	6006	5080	5122	5187	3277	6147	5295	3929	4472.25
unknown1833	1	1	18	15	777.994	0.999562	1	20	12	6129.25	1	1	19	13.6167	5100.7	1092.15	0.214118	7666	5005	4699	3320	3359	5730	3458	6594	7176	8393	4272	4676	3663	4876	3819	4736	5090.12
unknown1836	0.0579045	0.266686	24	6	1504.72	0.356307	1	26.6465	5.99997	8238.75	0.100702	0.496847	25.3233	6.01641	7092.37	536.277	0.0756131	8842	9811	8259	5932	7467	8011	7052	10425	7675	6893	5121	5660	3590	6785	5584	6753	7116.25
unknown1841	0.587657	0.97978	24	6	1741.96	0.835251	1	26.4865	6	7299.75	0.840141	1	25.2432	6.01459	5659.6	982.21	0.173548	12730	8099	3605	3384	8760	5396	4353	10690	2800	6243	5689	4818	1602	5776	3446	3819	5700.62
unknown1842	0.719948	1	24	9	8525.59	0.988467	1	25.7143	6	27660.2	0.95373	1	24.8571	7.56071	21808.1	7715.75	0.353802	50793	18593	10498	5659	26542	30768	9625	43706	25197	52012	14855	15651	13006	20139	5566	10854	22091.5
unknown1858	0.105571	0.365115	24	12	22795.4	0.597133	1	20.2759	12	121490	0.237281	0.802035	22.1379	12.0855	93225.1	33542.5	0.359802	107621	69699	52530	59122	79295	84560	53907	162292	141183	140289	98480	106009	76888	90563	60604	78725	91360.4
unknown186	0.0579045	0.266686	24	12	25911.2	0.205127	1	24.5682	12	141874	0.0645331	0.405657	24.2841	12.0016	115841	31378.3	0.270873	113349	89940	71675	74042	117628	113367	103111	165587	154172	161676	110194	141453	121245	116378	87880	116462	116135
unknown1861	0.0787266	0.310786	24	15	2135.46	0.257257	1	20.9501	12	8844.75	0.0992284	0.494463	22.4751	13.4602	5830.9	3638.28	0.623966	4930	4254	2320	3243	4181	3901	2972	7683	11051	12047	6248	6033	8022	3515	4500	7077	5748.56
unknown1865	1	1	24	12	1387.17	0.999623	1	23.52	6.00001	6329	1	1	23.76	8.97062	5279.1	1070.12	0.202709	5540	3504	5330	2840	6477	10615	2204	6020	5187	7789	5116	4823	2266	10009	2712	3843	5267.19
unknown1869	0.719948	1	24	6	254.205	0.973656	1	22.4427	5.99999	2033.5	0.950022	1	23.2214	6.00675	1832.84	53.491	0.0291848	2173	2918	1518	1506	2107	1808	1793	2426	2356	1401	1234	1355	2090	1201	1405	2013	1831.5
unknown187	1	1	18	12	5855.9	0.998329	1	20	12	47574	0.999999	1	19	12.0333	42294	5679.56	0.134288	58317	42947	33160	30140	36240	44816	27737	47272	53166	56970	39943	40217	36445	44391	33302	40906	41623.1
unknown1879	0.719948	1	24	21	197.106	0.980975	1	28	17.9999	1991.25	0.951874	1	26	19.7321	1686.94	187.567	0.111187	1110	1711	1549	2006	1260	1225	2265	1406	1617	1251	1483	1912	2170	1303	2459	2033	1672.5
unknown1880	1	1	24	6	762.615	0.99208	1	28	12	5927.5	0.999969	1	26	8.82142	5837.1	140.522	0.024074	13960	6130	6596	4389	5957	7377	4333	4553	5252	8487	5569	4402	2317	7144	3069	3656	5824.44
unknown1881	0.475047	0.855944	24	12	25947.6	0.65189	1	24.9858	12	122449	0.67269	1	24.4929	12.0049	97709.9	31080.3	0.318088	94758	67535	62335	45850	79309	129611	59248	168591	131665	144195	92303	121633	61119	137407	82770	93127	98216
unknown1887	1	1	18	15	624.022	0.999802	1	20	12	5266.25	1	1	19	13.6167	4964.14	524.578	0.105673	5033	4811	5401	4721	4282	6406	2866	3740	6032	5848	5316	3869	3187	8164	5162	4507	4959.06
unknown1888	1	1	24	6	421.789	0.999257	1	24.4321	6	4986.5	1	1	24.2161	6.00048	4392.97	479.814	0.109223	5407	6208	3009	3729	3252	4970	3654	8070	5192	4733	2881	4144	3983	2437	3777	4896	4396.38
unknown1898	1	1	24	6	744.23	0.964296	1	24.2975	6	7272.75	0.999355	1	24.1488	6.00023	6043.09	1210.21	0.200264	8053	5990	6592	3840	5019	9045	3906	11121	6401	7004	5102	5642	3141	6970	3894	5064	6049
unknown1901	0.182589	0.483038	24	15	990.657	0.908595	1	28	6	3072.25	0.463916	1	26	10.9107	2798.48	123.294	0.0440575	705	765	1633	1342	1691	4640	1374	4584	3391	3138	2715	2194	1600	4921	7689	2553	2808.44
unknown1904	0.475047	0.855944	18	6	729.734	0.465477	1	20	6	3794.25	0.554807	1	19	6.01667	2955.19	737.03	0.249402	3349	4145	2088	2051	3082	5178	2609	4308	2565	2116	2040	2190	2402	3133	1944	2654	2865.88
unknown1907	0.475047	0.855944	24	12	1306.03	0.87883	1	20	12	10601.8	0.782162	1	22	12.1	8719.69	2038.38	0.233768	10347	7523	6488	6258	7243	7633	6241	12354	12721	12546	9315	7825	5710	8340	6596	10451	8599.44
unknown191	1	1	18	0	280.368	0.999979	1	28	12	6039.75	1	1	23	4.92857	6121.83	277.939	0.0454013	7348	7483	5928	5185	5440	5898	6257	6410	6427	6058	5170	6504	5642	5558	6592	6141	6127.56
unknown1910	1	1	18	9	463.508	0.999996	1	20	6.00001	3596.75	1	1	19	7.60001	2969.17	621.81	0.209422	3539	3518	825	901	2063	3440	1739	7145	4001	4034	1313	1975	3696	1339	1369	4654	2846.94
unknown1915	0.139706	0.411743	24	15	1572.08	0.46834	1	23.6461	12	8348.75	0.243843	0.80837	23.8231	13.4896	6677.83	1924.43	0.288182	5932	6390	3508	4425	5405	6599	3375	9420	10010	8920	6282	8183	8444	7380	6108	6369	6671.88
unknown1927	0.873774	1	24	6	371.231	0.992652	1	22.6735	6	4393.5	0.990785	1	23.3368	6.00485	3990.17	315.419	0.0790489	4782	4562	3459	3523	4687	5370	3830	3687	4058	3888	3474	3890	2679	5328	3510	3008	3983.44
unknown1928	0.719948	1	18	12	829.967	0.999996	1	20	12	25934.5	0.956505	1	19	12.0333	23409.8	3140.91	0.134171	26621	21591	24651	19610	19757	26988	17649	26676	22974	35109	24866	20789	17631	34920	13468	15320	23038.8
unknown1930	0.105571	0.365115	24	6	3167.48	0.220989	1	28	6.63e-05	11997.7	0.111004	0.521572	26	3.25003	9182.79	1492.42	0.162523	12688	11146	14870	9287	10557	13884	8201	10953	4995	10304	9217	6398	4420	10737	5489	4167	9207.06
unknown1931	1	1	24	12	445.3	0.990341	1	21.5648	6.00001	6056.75	0.999953	1	22.7824	8.86499	5110.79	866.987	0.169638	4615	5837	3785	3522	4178	6278	3738	10033	7976	4124	4195	5022	3713	4784	4251	4935	5061.62
unknown1936	0.380147	0.737824	24	9	375.827	0.962717	1	20.3695	5.99999	7497.5	0.733849	1	22.1848	7.42698	6659.17	661.114	0.0992787	6368	7762	6160	5230	7880	9766	6763	5581	6512	6592	6252	6726	4496	7994	5562	6095	6608.69
unknown1937	0.0579045	0.266686	18	12	1371.08	0.410647	1	20	12	8949.25	0.112685	0.523773	19	12.0333	7288.9	1803.23	0.247394	7782	6761	6585	3691	6663	7710	4859	8654	8563	10180	8142	8912	4834	7797	6242	5839	7075.88
unknown194	0.105571	0.365115	24	12	5176.02	0.234614	1	24.2975	12	30467	0.116366	0.530089	24.1488	12.0005	25134.7	6456.37	0.256871	25037	19873	15890	16957	25417	24843	22103	35470	33089	34904	23955	29920	26514	24649	19112	24927	25166.2
unknown1941	0.235786	0.556281	24	15	2646.17	0.423751	1	22.2166	12	16437.2	0.330062	0.936891	23.1083	13.4622	12773.2	4372.93	0.342353	12011	8599	12002	6059	13777	13492	8108	11620	12921	21867	17321	13640	11232	18410	10616	11679	12709.6
unknown1956	1	1	24	6	743.169	0.979863	1	28	4.8e-05	6036.75	0.999796	1	26	3.25002	5319.75	61.2708	0.0115176	6431	5082	7199	5435	5207	7972	4155	5152	4856	5819	5274	4549	2985	7317	4118	3581	5320.75
unknown1959	1	1	24	6	1454.87	0.964797	1	24.9858	6	11044.2	0.999373	1	24.4929	6.00243	9503.61	1288.37	0.135566	11380	10111	10826	7763	7648	14002	6706	15821	9598	11130	8067	8040	4819	10929	7253	8301	9524.62
unknown1962	1	1	18	12	1125.54	0.999002	1	20	12	10303.2	1	1	19	12.0333	9252.51	1033.92	0.111744	9986	10848	8456	6472	7462	11418	5445	9325	11947	11787	8388	9091	7052	10685	7019	10705	9130.38
unknown198	1	1	18	15	275.948	1	1	28	12	9222.75	1	1	23	14.5119	8837.46	771.513	0.0873003	10383	10656	8187	7146	7205	10627	6775	10312	10155	9633	7975	9128	7574	8812	7600	9194	8835.12
unknown1994	1	1	24	6	423.557	1	1	28	6.63e-05	5554.5	1	1	26	3.25003	5141.37	295.289	0.057434	5592	5988	6376	4262	5067	7354	3431	4515	4581	5771	5809	3980	2019	9631	3519	4290	5136.56
unknown1999	1	1	24	12	1041.39	0.999989	1	24.2975	6.00001	19148.8	1	1	24.1488	9.01883	17797.2	1221.96	0.06866	21603	20065	14641	13702	13882	24437	13494	24782	18385	21274	15179	17894	11494	19127	14883	20048	17805.6
unknown2003	0.873774	1	18	3	221.324	0.993578	1	28	7.29e-05	2989.75	0.9909	1	23	1.9167	3151.52	635.429	0.201626	2404	3499	2822	3234	2878	2314	3815	2681	2049	2110	2546	4721	4862	2034	4678	3946	3162.06
unknown2008	0.139706	0.411743	24	15	1131.02	0.787653	1	28	6	5601.25	0.352889	0.967227	26	10.9107	4669.86	1085.75	0.232502	3160	3882	2688	1525	4005	5980	2985	9435	5817	5527	4285	5889	4083	5240	6730	4890	4757.56
unknown201	0.301037	0.636029	24	15	657.963	0.490577	1	28	12	4757	0.430152	1	26	13.6964	4273.16	484.708	0.113431	4369	3924	3105	2479	3782	4903	3891	4318	4838	5701	4432	4057	4921	4887	3588	5471	4291.62
unknown2019	0.587657	0.97978	18	12	1116.17	0.991937	1	20	12	11264.2	0.897524	1	19	12.0333	9911.14	1611.69	0.162613	12702	9969	6344	8798	8457	9396	7137	13606	13186	12935	9358	9578	8108	9139	7774	9045	9720.75
unknown202	0.301037	0.636029	24	15	23575.5	0.601856	1	28	17.9999	97788.2	0.490685	1	26	16.4821	74113.2	27888	0.37629	33452	53593	43375	23329	58863	120146	45965	94516	92076	81342	79343	78123	47053	121784	135329	86987	74704.8
unknown2022	0.873774	1	18	6	366.988	0.852491	1	28	6	3528.25	0.964273	1	23	6.29762	3713	357.507	0.0962852	2510	3066	3002	2698	3277	3233	4585	3018	2164	2736	2623	4757	7349	2263	5236	7088	3725.31
unknown2034	0.587657	0.97978	18	12	7293.1	0.939556	1	24.8451	6	130473	0.880084	1	21.4225	9.72758	114013	20886.4	0.183193	135519	140910	74076	69371	155993	124522	96329	145047	149689	161294	55498	129616	70355	135881	52980	88030	111569
unknown2038	0.0787266	0.310786	24	3	1467.6	0.0966392	1	28	6.63e-05	5494.74	0.0447244	0.329356	26	1.62503	3524.41	411.086	0.11664	4870	6748	5807	4554	3332	4701	2384	3731	3390	2468	2495	2489	1484	3771	2228	1814	3516.62
unknown2047	0.587657	0.97978	24	12	2062.63	0.694567	1	24.2975	12	11072.2	0.773917	1	24.1488	12.0005	8539.82	2646.97	0.309957	8068	3995	7242	4433	11597	10676	7062	5679	6168	15993	11560	10568	5923	12986	6721	8173	8552.75
unknown2054	1	1	24	6	858.604	0.985969	1	24.4321	6.00001	6994.5	0.999901	1	24.2161	6.00048	5787.61	1109.97	0.191784	7607	5907	6636	3777	4415	9242	3170	11151	5759	7156	5005	4763	2606	6772	3961	4801	5795.5
unknown206	0.587657	0.97978	18	12	220.617	0.993131	1	26.4865	12	4272.75	0.897903	1	22.2432	12.4532	3762.35	751.806	0.199824	3975	5131	3299	2681	3048	4159	3541	4487	4345	5786	3489	3471	3218	2692	2725	3598	3727.81
unknown2063	1	1	24	6	288.5	0.95499	1	28	6	3906.75	0.998971	1	26	6.03571	3539.19	348.029	0.0983356	3819	4991	3169	3248	3034	4181	2815	5597	4392	3475	3181	3362	2355	3450	2954	2983	3562.88
unknown2066	0.139706	0.411743	24	18	468.812	0.596514	1	25.1282	17.9999	3278	0.290417	0.895029	24.5641	18.0095	2811.32	295.484	0.105105	2524	2866	3459	1354	2092	2971	1981	2509	3394	2965	3181	2491	2910	3083	3580	3539	2806.19
unknown2067	0.380147	0.737824	24	9	7026.52	0.79976	1	26.0177	6.00002	47294.5	0.666013	1	25.0088	7.57284	39448.7	7527.7	0.190823	52979	46531	36614	27230	51436	63448	23556	50738	35035	53940	37233	41697	22972	42771	19652	30554	39774.1
unknown207	0.380147	0.737824	24	15	797.086	0.539985	1	20.3695	12	7169	0.530307	1	22.1848	13.4674	6260.97	1089.04	0.173941	6684	6665	5228	4251	4942	6339	4808	6712	7718	8154	6438	6366	6106	6355	6117	6849	6233.25
unknown2074	0.0787266	0.310786	24	9	1962.93	0.495354	1	21.7778	6.00001	8638.5	0.165516	0.659934	22.8889	7.44473	5488.34	2657.03	0.484122	5710	7019	3429	2043	5521	8490	4550	15993	5588	4401	7197	4424	1456	1501	4939	3549	5363.12
unknown2105	0.587657	0.97978	18	15	415.425	0.999009	1	20	12	2883.5	0.899753	1	19	13.6167	2633.17	527.818	0.200449	2726	3766	2463	2882	1755	2374	1889	2794	3598	2710	2918	2308	2007	2033	2941	2885	2628.06
unknown2113	0.182589	0.483038	24	21	544.119	0.653918	1	26.6465	17.9999	2704.74	0.373154	0.999493	25.3233	19.632	1874.22	556.754	0.297059	641	1435	2027	2558	959	1214	1145	1849	1987	657	1303	2923	2112	2263	4178	2266	1844.81
unknown2118	0.719948	1	24	15	1538.13	0.983016	1	26.6465	12	9420	0.952384	1	25.3233	13.6156	7907.17	1609.82	0.203589	8163	3403	8060	4378	9920	8655	7900	3696	4452	11415	9324	12489	5572	14887	9363	5479	7947.25
unknown2125	1	1	18	0	1403.96	0.840844	1	28	12	6393.25	0.986604	1	23	4.92857	6284.16	1314.04	0.209104	9922	6484	7037	11163	4661	4863	5564	8366	7953	6177	5516	5927	1306	3769	6876	5396	6311.25
unknown2127	0.380147	0.737824	18	0	161.927	0.994476	1	28	12	1155.75	0.745788	1	23	4.92857	1153.23	143.374	0.124324	1357	1413	1195	1381	945	897	1491	1009	1216	1126	1129	1152	1212	633	1098	1245	1156.19
unknown2132	0.182589	0.483038	24	15	4126.68	0.756648	1	20.6557	12	18619.8	0.411617	1	22.3279	13.4632	14921.7	4215.89	0.282535	13560	24113	7368	6495	11107	11819	8221	13264	16872	17014	26825	13768	16062	12134	19394	19102	14819.9
unknown2133	0.235786	0.556281	24	15	3146.63	0.60337	1	23.2718	12	18994.2	0.419694	1	23.6359	13.4801	14331.9	5873.08	0.40979	12909	11096	9930	6101	9296	17858	7950	21225	21967	26379	14219	13412	9731	16184	12945	17520	14295.1
unknown2138	1	1	18	9	784.181	0.999225	1	28	5.99999	2551.25	1	1	23	8.21428	2247.45	228.198	0.101537	932	1618	1900	838	1138	3947	988	4132	2469	3004	2627	659	1006	4142	3757	2636	2237.06
unknown2140	1	1	18	15	732.916	0.999967	1	20	17.9999	5319.25	1	1	19	16.4666	4705.75	807.956	0.171695	5770	3582	7944	3741	2857	6606	3460	2625	2428	8273	3366	5585	3290	8905	5045	4037	4844.62
unknown2143	1	1	24	18	354.968	0.986744	1	28	6	2637.25	0.999912	1	26	25.5357	2664.16	173.62	0.0651688	1810	2815	2427	1801	2529	3487	2205	2328	2657	2385	3376	1975	1764	3844	3720	3339	2653.88
unknown2147	1	1	24	12	833.325	1	1	27.8233	12	22029.2	1	1	25.9117	12.0657	20512.3	1742.16	0.0849323	21199	27563	20067	15114	13953	30162	11477	26878	24981	28631	18397	16108	11783	21275	19829	22552	20623.1
unknown2155	0.235786	0.556281	24	6	864.792	0.495393	1	28	6.55e-05	4898.25	0.367618	0.991972	26	3.25003	4105.47	209.56	0.051044	5465	5117	4685	4326	3840	4790	3954	5607	5298	3160	3923	3274	1677	4681	3514	2431	4108.88
unknown2166	1	1	24	6	592.732	1	1	27.1385	6.00001	5360	1	1	25.5692	6.02269	4935.09	450.925	0.0913711	6417	5801	4272	4036	4603	6905	2115	7817	4707	6846	4469	4232	2620	8576	2543	3385	4959
unknown217	0.475047	0.855944	18	12	1025.66	0.63916	1	20	12	7023.5	0.665541	1	19	12.0333	5975.55	1043.7	0.174662	6436	7180	4265	3231	5705	5827	4589	5994	7172	7777	7306	5839	6174	5530	5015	5596	5852.25
unknown218	0.587657	0.97978	24	21	545.886	0.692512	1	24.8451	17.9999	2677.74	0.772833	1	24.4225	19.5318	1814.44	830.639	0.457794	864	1500	1397	4263	825	878	1661	1072	1587	856	1481	1701	3576	988	3444	2703	1799.75
unknown2190	1	1	18	12	2162.16	0.982295	1	21.8859	12	9171.5	0.999842	1	19.9429	12.115	7265.61	1533.37	0.211044	6760	1818	9220	4357	8081	5160	2504	8018	7286	12974	10478	5948	3992	15685	6944	4516	7108.81
unknown2192	1	1	18	0	112.43	0.999992	1	27.4766	7.84e-05	1107.25	1	1	22.7383	3.24e-05	982.209	61.1662	0.0622742	919	1406	678	1426	1026	714	882	1351	1112	630	634	1239	1394	467	847	1036	985.062
unknown2203	0.719948	1	24	6	1250.7	0.942308	1	28	4.17e-05	8613.75	0.941637	1	26	3.25002	7214.1	148.452	0.020578	11384	8731	7626	6714	6905	10026	7309	6144	5868	8286	5868	7112	3689	10608	4445	4672	7211.69
unknown2204	0.182589	0.483038	18	9	1761.76	0.619546	1	24.0327	12	8043.5	0.359648	0.97834	21.0163	10.501	6739.47	2046.99	0.303731	6416	4697	4796	3977	6420	7334	4760	13172	11095	9311	5925	5843	2980	6098	5439	5496	6484.94
unknown2212	0.587657	0.97978	24	18	4488.36	0.839229	1	28	17.9999	26665	0.841799	1	26	18.1071	19828.7	4089.93	0.206264	10487	16897	12718	27177	11243	12162	20582	20210	20270	12989	18637	23748	39438	11541	26430	29251	19611.2
unknown222	1	1	24	18	374.059	0.999995	1	21.0501	17.9999	4871.5	1	1	22.5251	18.0775	4541.28	293.102	0.0645416	4254	5232	3446	5127	3362	2932	4701	5364	5755	3866	4014	5386	6859	2329	3877	6421	4557.81
unknown2220	0.587657	0.97978	24	6	13407.8	0.990731	1	24.4321	6.00001	96947	0.897142	1	24.2161	6.00048	86346.8	6985.33	0.0808986	103625	108391	109318	47297	81298	115734	74924	115832	71929	102594	71032	79239	40727	99839	77851	82713	86396.4
unknown2232	0.587657	0.97978	24	6	3233.42	0.992481	1	23.2718	6	24618.5	0.897697	1	23.6359	6.00142	21830.3	1928.16	0.0883251	26004	27413	26721	11688	20867	29309	19137	29161	18105	25499	18016	20044	10331	25267	19806	21552	21807.5
unknown229	0.719948	1	18	15	229.103	0.947361	1	20	12	4248	0.943038	1	19	13.6167	3944.15	332.029	0.0841827	3547	4319	3930	3804	3148	4466	3449	3933	4283	4737	3965	4007	3850	3780	3813	4024	3940.94
unknown23	0.380147	0.737824	18	3	155.917	0.662542	1	27.3065	17.9999	18275.5	0.59915	1	22.6533	9.35407	12119.4	3442.21	0.284025	7501	11705	8358	17952	6917	6898	13324	11922	11662	6344	10030	11637	20652	7080	21731	23639	12334.5
unknown237	0.139706	0.411743	18	12	1921.56	0.633027	1	20	12	13174	0.30294	0.90563	19	12.0333	10872	2535.99	0.233259	13327	11474	7930	6146	10163	10288	9126	11251	16413	13361	11581	11341	10535	9464	6998	9761	10572.4
unknown246	0.182589	0.483038	24	15	3331.89	0.727755	1	21.1511	12	25414.5	0.401073	1	22.5755	13.4589	20516.8	6250.15	0.304636	24656	18578	12813	11194	17301	17658	14018	32343	28102	24845	22605	26106	20210	22526	15806	17357	20382.4
unknown247	1	1	24	0	133.643	0.998254	1	24.8451	17.9999	1656.75	0.999998	1	24.4225	21.0582	1488.82	157.958	0.106096	1273	2216	1198	1453	1415	1346	1206	1473	1864	954	1291	1456	2088	1145	1552	1842	1485.75
unknown251	0.380147	0.737824	24	18	590.434	0.8302	1	25.2722	17.9999	5817.74	0.679573	1	24.6361	18.012	4864.64	877.7	0.180425	4820	4512	5365	4268	3233	4614	4108	4174	4982	6907	2906	4401	5761	7612	3689	6209	4847.56
unknown255	1	1	18	6	4337.75	0.993848	1	20	5.99998	18392.5	0.999981	1	19	6.01666	15177.1	4040.57	0.266227	18845	11375	9838	4814	19500	25842	9880	18348	24690	18594	9589	8719	13977	18637	7904	14448	14687.5
unknown257	1	1	18	9	1036.97	1	1	28	6	7150.5	1	1	23	8.21429	6287.06	354.169	0.0563331	4536	2591	6666	2384	4772	14929	3954	4947	4179	8387	5040	5208	2901	19078	6304	4459	6270.94
unknown26	0.301037	0.636029	18	9	1312.39	0.973003	1	28	5.99999	3818	0.652571	1	23	8.21428	2941	678.517	0.230709	808	970	2292	623	2638	6020	2110	4504	2865	2823	2341	3373	1637	4355	6460	2743	2910.12
unknown264	1	1	18	9	710.642	0.999998	1	24.0327	12	9727.5	1	1	21.0163	10.501	9170.4	891.381	0.097202	10477	7591	8644	6899	5341	10200	7142	16117	11241	13217	5631	8821	6822	10703	6844	9263	9059.56
unknown266	0.587657	0.97978	24	12	2878.99	0.755553	1	20	12	28042.2	0.804502	1	22	12.1	24031	4588.98	0.190961	23681	22653	20409	18198	20042	28328	18677	28500	27460	37445	23262	24002	19911	25908	19820	21868	23760.2
unknown271	0.182589	0.483038	18	15	801.506	0.999922	1	28	12	5918.75	0.49306	1	23	14.5119	5466.76	1407.62	0.257487	7597	6556	4847	6240	6456	4426	4358	4684	4647	6686	6805	5537	4389	4597	4636	4939	5462.5
unknown272	1	1	24	18	54.624	0.99956	1	28	17.9999	713.25	1	1	26	18.1071	621.516	12.6261	0.0203151	256	555	727	471	877	559	562	319	499	1405	307	565	674	952	629	598	622.188
unknown274	0.0579045	0.266686	24	15	1515.68	0.68574	1	28	12	8456	0.167812	0.663735	26	13.6964	7194.37	1534.2	0.21325	5142	6747	4257	3693	6265	7069	4994	12127	8387	10422	7153	7862	6936	6193	11024	7774	7252.81
unknown281	0.587657	0.97978	18	12	5233.65	0.910542	1	24.8451	12	65579	0.869691	1	21.4225	12.3143	57733	12882.2	0.223135	78337	50704	45458	39336	62178	64516	39394	87464	71643	87751	49788	53134	53575	50948	35920	39675	56863.8
unknown287	0.380147	0.737824	24	15	5667.11	0.993485	1	28	6.00002	40286.5	0.745421	1	26	10.9107	32275.8	2675.91	0.0829077	7877	10727	25963	7877	24393	72791	19675	44287	31836	27533	31046	32338	15576	51197	87266	29489	32491.9
unknown289	0.161148	0.474433	24	15	3390.22	0.590469	1	23.7736	12	31017.2	0.318978	0.929297	23.8868	13.4932	24850.7	8396.88	0.337893	27729	20353	14166	13073	22668	22893	18281	40774	35320	37035	24784	26930	25212	26337	18896	22893	24834
unknown300	0.139706	0.411743	24	15	1456.29	0.737748	1	22.1053	12	8453.25	0.337276	0.945762	23.0526	13.4611	6965.94	1667.58	0.23939	7251	6555	3925	5299	5165	5618	4303	9547	10391	9825	6272	7325	7351	5753	6899	9567	6940.38
unknown301	1	1	24	6	318.021	1	1	24.1644	6	10781.5	1	1	24.0822	6.00007	10288.5	403.221	0.0391915	11135	12833	9801	7960	7890	13914	8712	12610	10779	11885	8424	9548	8161	10239	9992	10750	10289.6
unknown307	0.301037	0.636029	24	3	1582.5	0.67776	1	28	6.63e-05	11503	0.528335	1	26	1.62503	9008.79	235.651	0.0261579	10703	12819	8798	13692	8744	5911	12818	8776	8661	6688	8666	9357	9940	3839	6482	8318	9013.25
unknown31	0.0787266	0.310786	24	12	1358.88	0.529456	1	23.1496	12	16949	0.174135	0.671823	23.5748	12.0039	14433.4	2587.09	0.179243	13908	12676	13383	8435	14456	17527	12240	13455	15670	21656	15371	15099	11478	17035	14237	13740	14397.9
unknown310	0.182589	0.483038	24	3	1577.56	0.12985	1	28	6.63e-05	7700.48	0.112427	0.523773	26	1.62503	4890.65	1074.27	0.219657	5541	7918	8533	8810	3836	3973	7224	2859	3637	2074	4361	4015	2945	3592	4256	4351	4870.31
unknown318	0.301037	0.636029	18	15	1780.14	0.804576	1	20	12	14785.2	0.585648	1	19	13.6167	11881.2	2992.56	0.251874	14964	12919	9688	8802	10093	13886	8075	10608	17679	16533	13498	11431	9204	10766	8579	12910	11852.2
unknown320	0.139706	0.411743	24	6	1048.29	0.624426	1	25.2722	6	6219	0.300017	0.899408	24.6361	6.004	4905.26	1147.96	0.234026	7562	6226	4612	2912	4754	6972	3933	9217	4674	5343	3813	5179	3429	4306	2597	3343	4929.5
unknown321	0.182589	0.483038	18	9	2634.86	0.825376	1	28	6.00001	6486.5	0.435903	1	23	8.21429	5231.11	1270.09	0.242795	2079	2348	2573	759	5160	8072	3537	9177	7078	4100	5025	5831	2945	7254	11433	5402	5173.31
unknown324	1	1	18	9	242.891	1	1	28	6.00001	2626.25	1	1	23	8.21429	2457.37	78.075	0.0317718	1883	2320	1567	2956	2177	1718	2863	3747	2517	1460	2672	2810	2444	1064	4666	2397	2453.81
unknown325	1	1	24	6	792.843	0.981515	1	28	12	4552.75	0.999828	1	26	8.82142	4277.32	127.01	0.0296937	10397	7930	3413	2992	4093	4871	2247	4126	3617	6987	4941	2666	3127	2689	1707	2451	4265.88
unknown330	0.587657	0.97978	18	9	6498.84	0.898745	1	28	6	19353.8	0.86531	1	23	8.21429	16456.5	3047.22	0.185168	5682	8443	11237	4806	13330	27343	9895	26847	18333	16553	16074	17848	8399	24092	35066	17137	16317.8
unknown332	0.380147	0.737824	24	15	5609.12	0.874906	1	23.3952	12	53350.8	0.698723	1	23.6976	13.4831	46748.6	8025.95	0.171683	49012	46800	31435	34721	35117	41778	42676	63575	62833	61401	43401	45768	49649	45633	43013	50493	46706.6
unknown335	0.301037	0.636029	24	15	496.743	0.517175	1	21.0501	12	2969.75	0.445254	1	22.5251	13.4595	2373.23	695.416	0.293025	1085	2178	1953	2637	1929	2613	1751	1763	2511	2300	3109	3959	2393	3095	1771	2679	2357.88
unknown339	0.475047	0.855944	24	15	2757.72	0.741982	1	28	17.9999	9286.74	0.720029	1	26	16.4821	7283.48	2905.93	0.398976	3013	3777	3886	4879	5132	10339	4187	12426	9537	8654	6304	8241	3966	11348	12585	9248	7345.12
unknown340	0.587657	0.97978	18	9	59506.2	0.572446	1	28	6	169996	0.702895	1	23	8.21428	146139	33259.1	0.227585	56742	88978	88136	48748	131152	209705	97362	241766	164989	173068	156019	163380	88021	186235	252264	167445	144626
unknown343	0.182589	0.483038	18	0	794.788	0.720475	1	26.9725	17.9999	3818	0.398383	1	22.4862	18.7462	3868.67	569.148	0.147117	4322	4927	5388	4216	2967	4406	3565	2678	4151	4210	2562	3822	3769	3948	3463	4092	3905.38
unknown344	1	1	24	12	1274.21	0.967909	1	20	5.99999	12626.8	0.999479	1	22	8.79999	10307.8	2157.15	0.209273	11249	12062	4925	2796	11176	11225	7454	20652	10836	10896	10119	11211	6979	9419	11617	9098	10107.1
unknown346	0.873774	1	24	15	355.321	0.920183	1	20.8511	12	7286.25	0.979404	1	22.4255	13.4611	6746.84	643.331	0.0953531	6775	6690	6390	5635	5815	7638	5539	6976	7470	8553	6419	6703	6256	6867	6784	7201	6731.94
unknown347	0.235786	0.556281	24	3	6789.29	0.563626	1	24.7059	5.27e-05	49100	0.401104	1	24.3529	1.52208	41232.5	8875.86	0.215264	58443	54228	46955	36774	38467	57935	38234	35247	24597	35396	40089	35234	32601	47740	41678	35290	41181.8
unknown35	1	1	24	0	2479.12	0.995789	1	25.5652	6.63e-05	24713	0.999991	1	24.7826	3.21e-05	24363.8	3603.8	0.147916	16540	23946	32754	25612	20485	24593	20117	25903	24820	19607	15293	29207	26275	24568	35072	23678	24279.4
unknown350	0.0787266	0.310786	18	9	2294.03	0.610626	1	28	6	7233.25	0.193975	0.710789	23	8.21428	5863.74	1542.06	0.262982	3687	3784	2374	1092	6569	8420	3901	10043	6842	5600	6507	6746	5032	6962	9976	5162	5793.56
unknown356	1	1	24	6	54.4472	0.886325	1	28	5.28e-05	572.75	0.993279	1	26	3.25002	432.798	20.1211	0.0464908	862	771	406	252	363	399	282	866	406	337	305	364	273	413	324	307	433.125
unknown359	0.0787266	0.310786	18	12	747.235	0.602764	1	20	12	6389.5	0.192092	0.709166	19	12.0333	5551.83	1028.1	0.185182	6168	5463	4131	4307	5460	5879	4465	7014	6951	7494	5494	5619	5239	4857	3566	4779	5430.38
unknown36	0.105571	0.365115	24	12	1583.92	0.492693	1	24.9858	12	11042	0.20578	0.741072	24.4929	12.0049	9285.63	2099	0.226048	9147	8881	6857	3939	7111	11454	8294	12848	10398	12572	10122	11076	9386	9169	7198	10665	9319.81
unknown361	0.587657	0.97978	18	12	516.365	0.998612	1	28	12	12475.8	0.899629	1	23	12.5952	11001.6	2348.83	0.2135	12204	16712	10461	7695	8092	11374	11084	13774	12998	18098	9147	9660	8709	7136	7185	10724	10940.8
unknown365	0.719948	1	24	15	693.318	0.849167	1	28	6	2553	0.912189	1	26	10.9107	2373.61	138.725	0.0584449	1210	1663	1555	914	1720	3591	1475	3426	2387	2620	2221	2682	1311	4016	4647	2719	2384.81
unknown367	0.873774	1	18	15	1070.03	0.995726	1	20	12	6370.5	0.991164	1	19	13.6167	5822.6	1120.34	0.192412	6575	4894	7562	6552	4972	5061	4992	4223	4638	8664	5999	6181	4498	7821	5906	4450	5811.75
unknown370	0.139706	0.411743	24	3	5194.76	0.205297	1	28	6.63e-05	24623.9	0.130543	0.570557	26	1.62503	14525.1	2400.49	0.165265	32510	22777	28262	14947	7328	19654	9780	14517	9368	13264	11310	7368	4309	15233	10600	10447	14479.6
unknown371	0.235786	0.556281	24	12	50086.5	0.724939	1	21.7778	12	430772	0.472879	1	22.8889	12.0283	364832	76150.2	0.208727	427533	332866	228416	256716	346582	338321	291756	508965	486527	499327	349873	387362	359016	366779	283118	331641	362175
unknown383	1	1	24	12	113.314	0.99167	1	20.9501	6	1244.75	0.999965	1	22.4751	8.83713	1086.43	124.772	0.114846	1427	1113	831	667	991	1292	892	1804	972	1358	875	1166	982	1039	805	1027	1077.56
unknown387	0.873774	1	24	6	552.25	0.918438	1	23.6461	6.00001	8281	0.97907	1	23.8231	6.00033	7451.38	782.043	0.104953	7630	8361	6814	7171	7648	8209	6277	10990	9082	6939	6603	6829	5594	6750	7305	6948	7446.88
unknown388	1	1	24	12	1396.36	0.999721	1	25.2722	12	18887.5	1	1	24.6361	12.008	17726.7	1856.43	0.104725	21436	18555	17365	12496	14967	23293	14531	21639	19267	23408	15410	17465	13121	19022	14699	17579	17765.8
unknown393	0.587657	0.97978	18	15	3739.89	0.832773	1	20	12	32930.8	0.839102	1	19	13.6167	30577.5	3702.69	0.121092	37582	31727	27733	27560	26117	29733	24396	27965	37276	36471	28336	29640	28169	33710	29162	33089	30541.6
unknown394	0.182589	0.483038	18	3	617.304	0.647745	1	24.1644	6.63e-05	6910.99	0.370753	0.99593	21.0822	1.75688	5932.37	1892.25	0.31897	5179	5798	6798	9869	4546	3682	5806	6577	4281	3349	5111	5950	8464	3882	10046	7848	6074.12
unknown396	0.0787266	0.310786	24	15	633.921	0.526407	1	23.2718	12	4955.75	0.173372	0.671823	23.6359	13.4801	4075.62	1106.1	0.271395	4007	3710	2628	2664	3258	3842	3139	5880	5424	5851	4041	4507	4284	4469	3060	4335	4068.69
unknown397	1	1	24	18	288.146	0.978034	1	28	17.9999	3162.74	0.999757	1	26	18.1071	2193.94	540.854	0.246522	1092	1740	1878	2523	1588	1092	3071	1259	1418	1107	2774	2450	2083	1102	6278	3188	2165.19
unknown399	0.475047	0.855944	24	18	2282.19	0.749457	1	26.8085	17.9999	15145.7	0.723714	1	25.4043	18.0551	11814.6	2645.93	0.223954	7190	11464	9379	15662	7796	8891	13158	7998	12987	8708	9471	14069	17948	7487	17843	17305	11709.8
unknown40	0.268412	0.63165	24	6	2538.87	0.82843	1	28	6.63e-05	12181.7	0.55667	1	26	3.25003	8967.94	588.4	0.0656114	22211	14065	7445	5006	9436	11934	5939	12668	11522	9436	5866	7781	3834	7615	3550	5026	8958.38
unknown408	0.587657	0.97978	24	18	220.087	0.766424	1	26.0177	17.9999	3418.25	0.809643	1	25.0088	18.0293	3139.09	194.871	0.0620789	2910	3158	2921	3034	2284	3108	2931	3284	3443	3293	2732	3362	3085	3005	3643	3940	3133.31
unknown410	1	1	24	0	1467.6	0.999853	1	23.7736	6.63e-05	14623.2	1	1	23.8868	3.33e-05	13666.4	1911.64	0.139879	12651	22624	10991	12227	11097	13077	11477	15865	17646	10226	9779	11690	18175	9492	13761	17999	13673.6
unknown412	0.139706	0.411743	24	15	3519.98	0.700864	1	28	17.9999	16028	0.325436	0.933934	26	16.4821	9616.75	4454.62	0.463214	1375	1963	5482	1495	7255	15275	5416	11323	12269	9189	10358	9868	6761	15269	32496	9586	9711.25
unknown415	0.182589	0.483038	24	18	1250.16	0.529049	1	22.1053	17.9999	6506.75	0.322368	0.930432	23.0526	18.0304	5080.94	1054.99	0.207637	4546	4939	4691	4068	2603	5002	2535	3204	5730	9998	4532	3999	9709	6368	4373	5577	5117.12
unknown42	0.475047	0.855944	24	15	437.346	0.573352	1	28	17.9999	2102.75	0.626612	1	26	16.4821	1595	38.4553	0.02411	1024	1157	860	1412	1166	1046	1777	1810	2148	1052	1304	2366	2410	1137	2340	2524	1595.81
unknown420	1	1	18	15	220.441	1	1	20	12	3738.75	1	1	19	13.6167	3581.36	288.972	0.0806876	4077	4480	3428	2902	2748	4201	2707	3753	4160	3879	3199	3717	3374	3600	3131	3901	3578.56
unknown423	1	1	24	12	1098.31	0.999628	1	22.3291	6	19548	1	1	23.1646	8.90339	17926.9	1020.63	0.0569329	20162	20725	17092	13166	14833	22714	15008	25637	18712	20771	13932	17367	13289	16637	16306	19844	17887.2
unknown425	0.182589	0.483038	24	3	2509.7	0.247704	1	28	6.63e-05	12286.5	0.185256	0.695893	26	1.62503	7636.86	1286.27	0.168429	15256	12264	14487	7139	4308	10745	5394	7422	4947	7228	6243	4017	2420	8368	5845	5717	7612.5
unknown436	1	1	18	15	334.638	1	1	20	12	3289	1	1	19	13.6167	3069.19	368.233	0.119977	3668	4127	2881	2349	2474	3263	2329	3274	3881	3241	2950	3084	2695	3037	2647	3150	3065.62
unknown437	0.105571	0.365115	24	6	3633.29	0.560494	1	28	6.63e-05	22497	0.226469	0.783239	26	3.25003	19417.5	690.258	0.0355483	24887	26077	16687	22337	21820	14136	25265	26092	20723	15440	24172	20908	8868	8011	21408	14028	19428.7
unknown439	1	1	18	15	191.803	0.966956	1	21.5648	17.9999	4398.75	0.999448	1	19.7824	16.4988	4101.04	270.453	0.0659474	4415	3650	4066	4467	3664	4128	4464	2899	4240	4200	3719	4707	4376	4303	5192	3724	4138.38
unknown445	0.719948	1	18	15	355.321	0.988398	1	20	12	3614.75	0.953713	1	19	13.6167	3477.05	372.576	0.107153	3128	3492	3857	4275	3698	2737	2844	2934	3165	4350	4081	2863	2770	4070	3559	3752	3473.44
unknown447	0.105571	0.365115	24	15	16467.1	0.434657	1	28	17.9999	52825.2	0.187291	0.699772	26	16.4821	39631.1	25986.5	0.655711	10402	13192	17961	7864	35278	56148	21707	77268	53808	42743	45181	50064	33583	56899	82236	38583	40182.3
unknown449	0.0579045	0.266686	24	0	627.204	0.305007	1	27.1385	6.63e-05	3457.99	0.0889491	0.471971	25.5692	3.12e-05	2423.29	791.631	0.326677	3170	3693	2401	4568	1910	1519	3375	2001	1647	1509	1974	1903	2819	1111	1976	2657	2389.56
unknown451	1	1	18	0	419.668	0.961521	1	28	12	4197	0.99925	1	23	4.92858	4159.71	456.594	0.109766	5768	5873	4239	3562	3769	4476	3514	4148	4475	4345	3534	4434	3159	3758	3787	3865	4169.12
unknown455	0.873774	1	24	12	2864.67	0.940999	1	20	12	17981	0.983167	1	22	12.1	13615.1	5218.51	0.38329	19363	12036	6860	5617	12561	14904	6206	21000	22518	28055	11003	10348	12603	11850	8814	9177	13307.2
unknown457	0.105571	0.365115	24	15	3358.23	0.358545	1	27.8233	12	9222	0.161782	0.651815	25.9117	13.6852	7038.79	2043.73	0.290352	3222	5223	3833	4121	6276	4283	3822	10194	9997	8193	4852	13846	10687	5168	10477	9616	7113.12
unknown464	1	1	24	12	1401.49	0.998079	1	26.6465	6.00002	22242.2	0.999998	1	25.3233	9.18184	20974.5	1633.35	0.0778732	24877	25026	19081	16049	18504	26059	17569	26837	23648	25634	17392	21722	14631	18201	19718	22219	21072.9
unknown465	0.719948	1	24	12	4047.3	0.979865	1	20	12	56764.8	0.951596	1	22	12.1	51351.8	6336.78	0.123399	55436	49555	52587	35005	50877	54723	35612	63469	53354	64945	52523	56237	50481	56047	40205	44592	50978
unknown467	0.475047	0.855944	24	21	803.097	0.70522	1	20	17.9999	13134.2	0.701378	1	22	19.525	12261.5	933.047	0.0760955	11500	14065	12729	13257	10826	12639	11658	8769	13004	12126	13682	10771	12463	11369	14695	14010	12347.7
unknown472	0.0579045	0.266686	24	15	6089.6	0.229802	1	28	17.9999	19878.2	0.0707844	0.427617	26	16.4821	15149	6637.92	0.438175	6029	7685	6022	3788	15063	17671	7858	25876	19471	16016	18933	20712	14620	24452	26297	14144	15289.8
unknown476	1	1	24	12	123.567	1	1	21.4599	12	2546.5	1	1	22.7299	12.0376	2403.5	162.724	0.0677031	2341	3130	1945	1739	2080	2818	1599	3150	2803	3354	1921	2108	2107	2276	2380	2602	2397.06
unknown479	0.139706	0.411743	24	12	1818.33	0.687699	1	25.5652	12	7117.75	0.321145	0.930432	24.7826	12.012	5661.38	2006.23	0.354371	5170	3555	2818	2395	6319	7547	3127	9856	4943	10296	6557	6675	4122	8895	3404	5736	5713.44
unknown481	0.380147	0.737824	18	12	503.106	0.92021	1	24.5682	6	7755.75	0.717244	1	21.2841	9.69369	6972.93	1175.87	0.168634	8320	7154	5466	4392	5684	8285	5499	11555	6141	9036	6462	8992	4848	7319	4353	5740	6827.88
unknown483	0.873774	1	24	6	1140.21	0.875614	1	20	6	9587.5	0.969952	1	22	6.05	7202.96	2223.05	0.30863	7718	6497	8010	3753	6766	16046	7547	7991	3569	7915	6353	7373	4083	9842	3958	5620	7065.06
unknown487	0.182589	0.483038	24	15	2987.17	0.588411	1	28	17.9999	12424.2	0.347113	0.958253	26	16.4821	8301.93	3642.15	0.438712	1868	2993	5472	1689	6245	12817	4828	11144	10229	8452	9704	8929	6085	12649	22168	8795	8379.19
unknown489	1	1	18	0	322.441	1	1	28	12	4156.5	1	1	23	4.92857	4059.54	416.528	0.102605	6516	5066	3046	3469	5225	3934	3164	3013	3238	5831	3713	3844	2953	5938	1920	4220	4068.12
unknown493	0.105571	0.365115	24	18	1878.43	0.313184	1	28	17.9999	11802.5	0.145786	0.612785	26	18.1071	10004.1	88.0857	0.00880494	6954	10938	6423	8456	8213	10256	7527	11097	10990	12136	8557	11234	10387	11525	12113	13185	9999.44
unknown494	1	1	18	0	252.791	1	1	28	6.63e-05	3332	1	1	23	2.72e-05	3083.15	87.4444	0.028362	3417	3025	3828	3058	2537	4054	2945	2702	2329	2935	3373	3309	1760	3577	4138	2394	3086.31
unknown499	0.301037	0.636029	24	6	1555.28	0.87653	1	28	12	8721	0.615421	1	26	8.82143	8743.84	627.063	0.0717149	21467	15261	8587	6367	6679	8847	6454	9491	9462	11689	7135	6598	4556	5790	4529	6085	8687.31
unknown50	0.139706	0.411743	24	15	583.363	0.48661	1	28	17.9999	3487.5	0.250754	0.81706	26	16.4821	2851.28	272.256	0.0954859	1100	2754	2406	2340	2883	2460	2160	2432	3742	2794	1926	4581	3230	3125	4589	3006	2845.5
unknown506	0.301037	0.636029	24	6	1290.65	0.790239	1	28	6.63e-05	8904.98	0.579489	1	26	3.25003	6133.72	1788.87	0.291645	15288	10330	5168	4834	5086	6251	4484	8655	6848	7297	4612	4503	3040	4643	3130	3505	6104.62
unknown508	0.873774	1	24	15	327.39	0.942799	1	20	12	4974.75	0.983474	1	22	13.475	4293.65	900.46	0.209719	4576	4486	3161	3741	3290	3345	3902	5796	6353	4345	4782	4419	4888	3519	3945	3763	4269.44
unknown510	0.0579045	0.266686	24	15	1240.62	0.280095	1	22.1053	12	12180.2	0.0830659	0.456372	23.0526	13.4611	9785.24	2991.58	0.305724	9742	8840	6526	6051	8259	9644	7853	12194	12769	15234	10210	10508	8913	10485	8074	10528	9739.38
unknown513	0.139706	0.411743	24	18	71.7713	0.675349	1	28	17.9999	345.749	0.317087	0.926692	26	18.1071	250.252	54.1217	0.216269	33	225	284	263	150	197	363	67	330	177	187	299	400	300	377	306	247.375
unknown520	1	1	24	6	2372.34	0.999998	1	28	6.63e-05	26320.2	1	1	26	3.25003	24070.4	787.999	0.0327372	39483	27541	23783	14474	16001	32981	19164	30708	25562	34693	16227	20449	15553	27332	19256	21715	24057.6
unknown531	0.719948	1	24	9	1914.49	0.95215	1	24.2975	12	9568.5	0.944349	1	24.1488	10.4912	8409.52	1637.06	0.194667	9218	12115	6264	3055	9559	11520	5640	11005	10309	10298	10255	7412	8172	6895	5990	7012	8419.94
unknown533	0.587657	0.97978	18	6	852.064	0.898261	1	20	6	7570.5	0.865128	1	19	6.01667	6791.75	890.176	0.131067	6702	6876	5317	5501	7601	7641	6343	8697	6337	5748	5698	8506	7021	6530	6161	6263	6683.88
unknown541	1	1	24	12	707.991	0.993666	1	27.4766	6	7697	0.99998	1	25.7383	9.24478	7012.36	718.294	0.102433	9693	8203	6805	4660	6276	9628	5410	9474	7114	9651	5784	7017	3964	7403	5252	6767	7068.81
unknown546	1	1	18	0	286.555	0.99745	1	20	17.9999	5242.75	0.999997	1	19	18.05	5106.55	240.802	0.0471555	4843	5119	5582	6133	4286	5067	4444	5549	5315	4792	5586	4855	4368	5222	5511	5870	5158.88
unknown549	1	1	24	6	488.964	0.999688	1	26.9725	6	9682.25	1	1	25.4862	6.02047	9155.49	637.075	0.069584	11343	10038	9092	6884	7331	11709	7876	11813	9605	10859	8051	9246	6589	9664	7561	9338	9187.44
unknown561	0.182589	0.483038	18	9	4283.12	0.999497	1	28	5.99999	14089.8	0.492928	1	23	8.21428	9899.73	2559.36	0.258528	2248	2600	7110	2419	7809	22341	5478	20731	8672	7716	8675	9172	4083	16050	23757	7671	9783.25
unknown564	0.182589	0.483038	24	15	3340.73	0.523124	1	28	12	15250	0.319833	0.930432	26	13.6964	12459.7	3132.3	0.251395	7079	15353	6684	3781	14130	13687	10230	11975	17052	12163	19451	12334	15088	8698	19413	14146	12579
unknown565	1	1	24	12	666.448	0.998321	1	24.5682	6	13160.5	0.999999	1	24.2841	9.03634	12345.8	728.972	0.0590464	14114	13269	11638	9892	10962	15517	11184	14979	12294	14283	10858	12854	8704	12051	11956	13130	12355.3
unknown567	0.380147	0.737824	18	15	1152.58	0.970122	1	20	12	9257	0.736668	1	19	13.6167	8504.38	1233.05	0.14499	11317	6826	8435	8533	6701	8103	6821	7772	10077	11377	7467	8107	7005	10066	7971	9301	8492.44
unknown568	0.235786	0.556281	18	9	1149.05	0.956309	1	28	6	3816	0.561345	1	23	8.21429	3032.51	647.03	0.213365	1471	1495	1877	764	2062	5210	2078	5914	3095	2726	3122	3097	2072	4654	5440	2972	3003.06
[truncated: 129 more rows]

## Sheet: shared cycling in perAM and AS
CycID	JTK_pvalue	JTK_BH.Q	JTK_period	JTK_adjphase	JTK_amplitude	LS_pvalue	LS_BH.Q	LS_period	LS_adjphase	LS_amplitude	meta2d_pvalue	meta2d_BH.Q	meta2d_period	meta2d_phase	meta2d_Base	meta2d_AMP	meta2d_rAMP	0	0.1	0.2	0.3	6	6.1	6.2	6.3	12	12.1	12.2	12.3	18	18.1	18.2	18.3	PerM	CycID	JTK_pvalue	JTK_BH.Q	JTK_period	JTK_adjphase	JTK_amplitude	LS_pvalue	LS_BH.Q	LS_period	LS_adjphase	LS_amplitude	meta2d_pvalue	meta2d_BH.Q	meta2d_period	meta2d_phase
[truncated: 202 more rows]
[truncated: 20 more columns]

[truncated: 4 more sheets: 0.5 cycling in perAM, 0.5 cycling in perAS, total perAM, total perAS]
