# Supplementary material for: The microbiome interacts with the circadian clock and dietary composition to regulate metabolite cycling in the Drosophila gut
Source: eLife journal article supplement (doi:10.7554/elife.97130), 2024-05-01
Supplement: supp1 [file Table17-Protein-Lipids-AM versus AS.xlsx]

## Sheet: unique cycling in proteinAM
CycID	JTK_pvalue	JTK_BH.Q	JTK_period	JTK_adjphase	JTK_amplitude	LS_pvalue	LS_BH.Q	LS_period	LS_adjphase	LS_amplitude	meta2d_pvalue	meta2d_BH.Q	meta2d_period	meta2d_phase	meta2d_Base	meta2d_AMP	meta2d_rAMP	0	0.1	0.2	0.3	6	6.1	6.2	6.3	12	12.1	12.2	12.3	18	18.1	18.2	18.3	ProteinM
PC 38:5 Isomer B	8.77e-05	0.0554086	18	15	983.586	0.2288	1	20	12	5998.25	0.000237082	0.218089	19	13.6167	4795.49	1470.76	0.306696	4745	4870	5394	4662	3899	4260	4149	3467	5631	5966	5560	6836	3983	3816	4731	4531	4781.25
unknown1488	8.77e-05	0.0554086	24	3	1980.96	0.0489697	1	24.7059	5.91e-05	7433.24	5.74e-05	0.128779	24.3529	1.52209	5189.34	2444.72	0.471104	9010	7569	6410	6744	4796	6306	6106	5585	4658	2394	2633	2680	4085	4808	2774	6248	5175.38
unknown997	8.77e-05	0.0554086	24	15	3887.67	0.286729	1	21.3559	12	13881.5	0.000291434	0.218089	22.678	13.4583	7703.75	7103.85	0.922129	3209	3625	2575	3543	3901	4049	3804	4352	4728	15084	26669	9045	12428	5365	6028	12548	7559.56
Cer 35:1;2O|Cer 14:1;2O/21:0	0.000171384	0.0554086	18	6	2369.51	0.557416	1	20	6	6709.5	0.000979783	0.21957	19	6.01667	4681.34	2209.77	0.472037	3351	3374	2590	2800	6355	5870	6778	7835	2408	2550	3483	2278	5371	4885	3765	6924	4413.56
unknown1624	0.000171384	0.0554086	24	15	11841.2	0.430325	1	20	12	127726	0.000775478	0.21957	22	13.475	42662.2	110698	2.59477	3785	5043	2096	5002	9273	8221	4685	6616	9422	154118	306240	41126	20652	8065	13192	37424	39685
Cer 36:1;2O|Cer 14:1;2O/22:0	0.000320124	0.0554086	18	6	10277.6	0.521903	1	20	6	26017.5	0.00162013	0.21957	19	6.01667	17054.6	9653.96	0.566061	15515	9008	8183	7926	23223	22086	27397	31364	7487	8571	12207	4971	18352	17229	14061	26576	15884.8
unknown1074	0.000320124	0.0554086	24	15	9859.72	0.403783	1	22.1053	12	42324	0.00128662	0.21957	23.0526	13.4611	24463.1	19861.9	0.81191	9861	10331	8605	11248	13299	13733	13831	15864	14746	44678	86154	23718	39324	17219	19034	44893	24158.6
unknown1111	0.000320124	0.0554086	24	15	14666.8	0.291048	1	23.1496	12	49997.5	0.000957902	0.21957	23.5748	13.4773	30757.6	20169.4	0.655753	11875	14142	11123	14709	18158	21061	19169	19628	20524	53634	94208	31624	52848	23192	29299	54579	30610.8
unknown1182	0.000320124	0.0554086	24	15	1680.97	0.469653	1	21.1511	12	9559.5	0.00147379	0.21957	22.5755	13.4589	5435.59	4824.69	0.887612	2508	2468	1978	2889	3043	3187	3130	3767	3320	11142	19399	4377	7498	3720	3876	9007	5331.81
unknown1037	0.000572095	0.0554086	24	15	9609.23	0.315265	1	23.1496	12	32886.5	0.00173518	0.21957	23.5748	13.4773	20046.6	13658.1	0.68132	7867	8791	6667	9388	11531	13053	13876	13657	12981	36046	62304	20215	35211	14670	18036	34862	19947.2
unknown1145	0.000572095	0.0554086	24	15	28020.2	0.441894	1	21.995	12	129792	0.00234676	0.21957	22.9975	13.4602	77750.2	58744.8	0.755558	35480	36748	31281	38729	44225	48927	51677	57202	50808	136965	259801	71595	118319	52734	61682	132689	76803.9
unknown271	0.000572095	0.0554086	24	15	2267.69	0.381571	1	21.3559	12	14771.8	0.00205845	0.21957	22.678	13.4583	8846.36	7038.77	0.795668	4391	3218	4221	5579	5915	6629	6656	6838	7257	18108	26209	7513	8504	5641	6809	15768	8703.5
unknown725	0.000572095	0.0554086	18	6	2129.45	0.541091	1	20	6	8303	0.00281088	0.21957	19	6.01667	6125.46	2330.4	0.380445	5327	3590	4032	5111	6712	7576	9740	9184	4935	4163	4295	2920	5257	6577	5529	8541	5843.06
unknown805	0.000572095	0.0554086	18	6	1616.09	0.744026	1	20	6	4114.75	0.00372952	0.21957	19	6.01667	2834.67	1434.66	0.506114	2361	1142	1312	1700	3840	3603	4526	4490	1829	1348	1560	976	3387	3186	3351	3962	2660.81
unknown902	0.000572095	0.0554086	18	6	2096.22	0.693987	1	20	6	5449	0.00350634	0.21957	19	6.01667	3600.19	2079.05	0.577485	1897	1458	1944	2173	5897	4434	6139	5326	1722	2142	1780	1481	3453	4582	3566	5578	3348.25
unknown942	0.000572095	0.0554086	18	6	1075.86	0.604475	1	20	6	3328	0.00310184	0.21957	19	6.01667	2280.69	1133.13	0.496835	1518	1297	1758	1276	3544	2721	3904	3143	1224	1658	954	1328	2225	2137	1714	3893	2143.38
unknown970	0.000572095	0.0554086	24	15	3278.32	0.35844	1	22.9091	12	12162.5	0.00194649	0.21957	23.4545	13.4724	7281.79	5197.9	0.713821	2747	3079	2310	3526	3839	4444	4645	4836	4475	13106	23992	7077	12711	5267	6351	13336	7233.81
unknown1073	0.000987235	0.0554086	24	15	1667.18	0.454216	1	22.2166	12	8639	0.00390562	0.21957	23.1083	13.4622	5202.15	3774.4	0.725546	2350	2642	1853	2733	2909	2880	3238	3479	2785	10147	17110	4514	8070	3709	4231	9707	5147.31
unknown1123	0.000987235	0.0554086	24	15	1013.46	0.498718	1	20.9501	12	7989.5	0.00424226	0.21957	22.4751	13.4602	4475.22	4193.78	0.937111	2210	1621	1756	2294	2473	2956	3158	3179	3443	9935	15613	2967	3830	3189	2651	8810	4380.31
unknown1157	0.000987235	0.0554086	18	6	34933.4	0.802264	1	20	6	75377.2	0.0064478	0.21957	19	6.01667	47745.5	31543.3	0.660654	24260	19575	17840	18835	75858	64872	72859	87920	15456	22007	30935	11812	59716	52274	44566	83985	43923.1
unknown1179	0.000987235	0.0554086	18	6	92462.7	0.801436	1	20	6	196596	0.00644196	0.21957	19	6.01667	125078	81503.3	0.651617	64206	53971	49386	47871	195217	171924	188848	230394	39526	58335	78672	31529	157088	137133	120448	218682	115202
unknown1214	0.000987235	0.0554086	24	15	5391.69	0.450536	1	22.6735	12	23215.5	0.0038776	0.21957	23.3368	13.4682	14165.7	9754.85	0.688626	6267	6990	4817	7265	8200	8692	9189	9298	7392	27031	45963	12476	22139	9880	12446	26875	14057.5
unknown1449	0.000987235	0.0554086	24	15	3068.84	0.431252	1	22.9091	12	12161	0.00373025	0.21957	23.4545	13.4724	7113.97	5420.33	0.761928	2568	2541	2363	2830	3870	4364	4224	4829	3927	13329	25033	6355	10986	5392	5470	14942	7063.94
unknown1530	0.000987235	0.0554086	24	15	8851.56	0.436134	1	22.7907	12	34670	0.00376764	0.21957	23.3953	13.4702	20235.6	15722.8	0.77699	7357	7260	6585	8256	11564	12841	12239	14063	12143	36051	72512	17974	31042	15535	15841	39947	20075.6
unknown1562	0.000987235	0.0554086	18	6	2872.27	0.429907	1	20	6	6059.75	0.00371994	0.21957	19	6.01667	3078.01	3251.42	1.05634	1035	589	586	751	4978	4510	6137	8614	426	1003	1338	305	2305	2607	1521	6239	2684
unknown1637	0.000987235	0.0554086	24	3	802.743	0.06989	1	26.4865	4.47e-05	3721.5	0.000730096	0.21957	25.2432	1.57772	2725.43	903.14	0.331375	4616	3865	2961	3444	2740	3275	2864	2680	2349	1502	1812	2119	2229	2495	1464	2968	2711.44
unknown326	0.000987235	0.0554086	24	15	5178.14	0.455417	1	20.464	12	39860	0.00391476	0.21957	22.232	13.4659	20560.9	23451.8	1.1406	8827	5919	7071	10208	11187	10528	12916	13960	15489	50500	80861	12590	19620	11755	12539	35608	19973.6
unknown506	0.000987235	0.0554086	24	12	1391.59	0.0738346	1	20.0911	12	6946.75	0.000767301	0.21957	22.0456	12.0951	3977.02	3149.9	0.792024	1995	1839	1338	2240	3698	3404	2517	4387	2961	7585	8070	9171	2131	3280	3000	3099	3794.69
Cer 33:0;2O|Cer 14:0;2O/19:0	0.00164724	0.0626789	18	6	825.901	0.652697	1	20	6	2089.5	0.00842411	0.260918	19	6.01667	1284.63	898.015	0.699043	618	478	584	596	2192	1668	1742	2756	405	644	918	345	1237	1304	1084	2242	1175.81
PE 36:1|PE 18:0_18:1	0.00164724	0.0626789	18	6	120093	0.884753	1	20	6	317842	0.0109758	0.265798	19	6.01667	221372	110333	0.498408	152779	126510	110143	106858	305362	274975	316909	374120	97875	135448	181156	80505	247634	241030	190291	386432	208002
unknown1132	0.00164724	0.0626789	18	6	1692.64	0.863062	1	20	6	4585.75	0.010742	0.265798	19	6.01667	3196.7	1596.42	0.499396	2025	1804	1581	1777	4141	4155	4281	5766	1449	1980	2990	1450	3081	3300	2820	5452	3003.25
unknown1208	0.00164724	0.0626789	24	18	7473.77	0.0964207	1	21.0501	12	17325.2	0.00154821	0.21957	22.5251	14.8673	9512.43	10637	1.11822	4114	6322	3647	5921	1908	2735	1863	3904	8620	18320	27898	14463	18821	8030	7540	18863	9560.56
unknown1328	0.00164724	0.0626789	18	6	6552.05	0.910067	1	20	6	18257	0.0112476	0.265798	19	6.01667	12608.5	6478.41	0.513813	8934	6714	5419	6670	17995	14617	17620	22796	5340	8651	11786	3952	13725	12902	9353	22701	11823.4
unknown1359	0.00164724	0.0626789	18	6	9486.9	0.853984	1	20	6	21992.5	0.0106439	0.265798	19	6.01667	13943.8	9202.23	0.659951	8827	5449	3962	5038	19615	18037	21581	28737	4622	6430	8644	3050	18362	14899	13631	24375	12828.7
unknown1512	0.00164724	0.0626789	18	6	4494.72	0.955548	1	20	6	8882.5	0.0117329	0.266897	19	6.01667	5465.26	4040.06	0.739225	1855	1490	1279	1293	9055	7531	8245	10699	1181	1724	2204	971	7321	7349	6438	10976	4975.69
unknown1586	0.00164724	0.0626789	24	3	3479.32	0.145037	1	22.5575	6.63e-05	12399.2	0.00223129	0.21957	23.2788	1.45496	8625.4	4710.77	0.54615	16688	11158	11901	9850	8664	9739	7413	13834	6800	3131	4854	2599	7265	6501	5359	13386	8696.38
unknown1601	0.00164724	0.0626789	24	15	6676.68	0.372439	1	23.6461	12	24434.2	0.00515113	0.21957	23.8231	13.4896	15253.6	9670.04	0.633951	6569	6078	5342	7335	10159	10792	9096	12130	9293	26625	47163	14656	23959	11842	13429	29111	15223.7
unknown1602	0.00164724	0.0626789	24	15	2624.78	0.479252	1	21.995	12	12106.8	0.00642938	0.21957	22.9975	13.4602	7862.2	4768.86	0.606555	4236	4664	3679	5137	5129	5237	4945	6926	5750	11985	22976	7716	11513	5383	6178	13112	7785.38
unknown1658	0.00164724	0.0626789	24	15	3254.81	0.485074	1	21.8859	12	16746.8	0.00649783	0.21957	22.9429	13.4595	10605.3	6961.24	0.65639	5974	5900	4788	6266	6687	6668	7208	8739	6794	17875	32055	10263	15199	7450	7882	18059	10487.9
Cer d32:1	0.00267199	0.0697515	18	6	10183	0.946204	1	20	6	21397	0.0176478	0.315528	19	6.01667	13409.9	9428.89	0.703129	6074	4015	3436	3817	19561	17941	21440	26646	3644	5484	9334	3125	16120	15234	13207	27199	12267.3
Cer d34:1	0.00267199	0.0697515	18	6	26764.7	0.862626	1	20	6	62996.5	0.0163021	0.304985	19	6.01667	41214.5	25203.9	0.611531	23247	14430	17008	18501	54677	55020	69461	72828	16987	23716	25063	12739	44401	46017	44473	71996	38160.2
PI 36:1	0.00267199	0.0697515	18	6	127106	0.834844	1	20	6	348632	0.0158501	0.304985	19	6.01667	240056	120475	0.501862	176691	143441	121339	134057	356460	294791	341220	402058	115050	161448	221928	31169	246482	241028	185712	434429	225456
TG 60:2	0.00267199	0.0697515	24	15	7229.11	0.491201	1	21.8859	12	42319.5	0.0100219	0.265798	22.9429	13.4595	24844.7	19273.7	0.77577	11582	9136	11984	11997	12100	13720	11960	16279	16753	49991	87056	15478	32420	19927	19610	52321	24519.6
unknown1078	0.00267199	0.0697515	24	18	2342.29	0.111788	1	25.5652	17.9999	5623.25	0.00272295	0.21957	24.7826	18.0179	3231.84	1115.19	0.345065	858	1779	1053	1641	995	1114	880	1596	1959	3698	5768	7455	9055	3303	3722	6413	3205.56
unknown1131	0.00267199	0.0697515	18	15	5650.49	0.301931	1	20	12	25340.5	0.00655287	0.21957	19	13.6167	12663.4	13150.5	1.03847	7454	9315	6955	10437	2560	3918	2813	5790	10918	27189	49006	14249	16009	5809	6566	21588	12536
unknown1154	0.00267199	0.0697515	24	18	3512.55	0.244231	1	21.8859	12	10067.8	0.00543901	0.21957	22.9429	14.8934	5556.42	5978.02	1.07588	2262	2579	1569	2981	1264	1637	1536	2576	3760	11305	19416	5790	10078	4951	4191	13211	5569.12
unknown1158	0.00267199	0.0697515	18	6	991.01	0.907131	1	20	6.00001	5271.75	0.0170212	0.31153	19	6.01667	4477	882.45	0.197107	3432	3886	3847	3738	6115	5480	4487	5005	4315	2650	2952	3710	5260	4921	5106	5017	4370.06
unknown1188	0.00267199	0.0697515	24	15	36215.7	0.405669	1	24.8451	12	124300	0.0084842	0.260918	24.4225	13.53	80378.2	45878.6	0.570784	29578	37684	26509	38576	58048	59485	65834	64099	42763	131969	241743	80726	111331	64971	79564	158808	80730.5
unknown1204	0.00267199	0.0697515	24	18	6640.09	0.0978787	1	25.8651	17.9999	15248.2	0.00241889	0.21957	24.9326	18.0252	8578.58	3286.11	0.38306	2223	4743	2639	4360	2399	2656	2365	3963	5328	9756	14776	19603	24596	9180	10486	16731	8487.75
unknown1431	0.00267199	0.0697515	24	18	4688.83	0.2038	1	21.1511	12	12785.8	0.00463717	0.21957	22.5755	14.8699	6561.44	7752.78	1.18157	2230	3150	2162	3147	1343	1722	1320	2959	5032	13024	24737	8350	12393	5082	4951	13899	6593.81
unknown1485	0.00267199	0.0697515	24	0	2014.55	0.103454	1	21.995	7.9e-05	6144.49	0.00254135	0.21957	22.9975	4.13e-05	4120.28	2536.68	0.615657	7109	5872	6004	5593	2307	3484	4701	5310	4502	589	938	656	6451	4983	2924	5972	4212.19
unknown1566	0.00267199	0.0697515	18	6	1573.67	0.540337	1	20	6	4420.5	0.0108868	0.265798	19	6.01667	3095.64	1240	0.400563	3129	1841	2941	2584	4270	3991	4127	5294	2219	725	883	694	2015	2511	3173	6729	2945.38
unknown32	0.00267199	0.0697515	18	6	1761.58	0.83222	1	20	6	4887	0.0158073	0.304985	19	6.01667	3310.56	1810.32	0.54683	2491	1350	1261	1765	4720	4923	3865	6040	1962	1988	2464	993	3614	3256	3471	5296	3091.19
unknown571	0.00267199	0.0697515	24	15	2158.27	0.358551	1	24.7059	12	8177.75	0.00761706	0.24783	24.3529	13.5246	5602.57	2708.25	0.483395	3509	2186	2345	3418	4177	4270	5741	3905	4323	9660	14212	4516	7943	5211	4876	9626	5619.88
unknown750	0.00267199	0.0697515	24	15	1255.11	0.529858	1	20.6557	12	9247	0.0107034	0.265798	22.3279	13.4632	5218.93	4837.81	0.926975	2715	2155	2249	2907	3263	2840	3295	3941	3223	10772	18971	4022	4790	3384	4192	8915	5102.12
unknown776	0.00267199	0.0697515	18	6	2420.43	0.721077	1	20	6	6293	0.0139724	0.29316	19	6.01666	4045.54	2563.64	0.633697	2118	1464	1778	2154	5489	5142	7312	7229	1959	2732	2971	1320	3631	4055	3244	7160	3734.88
unknown846	0.00267199	0.0697515	24	15	1263.07	0.404179	1	20.9501	12	7665.5	0.00845702	0.260918	22.4751	13.4602	4281.64	4079.81	0.952862	1812	1899	1704	1998	2413	2841	3875	2926	3804	8954	14917	2987	3821	2791	3440	6847	4189.31
Cer 32:1;2O|Cer 14:1;2O/18:0	0.00421867	0.078272	18	6	1523.64	0.90981	1	20	6	3273	0.0251891	0.382091	19	6.01667	2065.12	1412.6	0.684028	1039	614	628	683	3130	2766	3365	3831	667	850	1382	552	2492	2063	2246	3995	1893.94
Cer 32:2;3O|Cer 14:2;2O/18:0;(2OH)	0.00421867	0.078272	18	6	1037.68	0.917671	1	20	5.99999	2742	0.0253734	0.382304	19	6.01666	1933.34	942.506	0.487502	1344	1055	990	916	2510	2509	2470	3479	894	1223	1995	855	1928	1936	1685	3317	1819.12
Cer 36:1;3O|Cer 16:1;2O/20:0;O	0.00421867	0.078272	18	6	11781.3	0.797252	1	20	5.99999	26136.8	0.022517	0.365636	19	6.01666	15849.2	11803	0.744706	7828	3647	5359	5907	22564	20494	28978	32511	5532	9952	11542	3272	13581	14968	12297	32271	14418.9
Cer 36:2;2O|Cer 14:1;2O/22:1	0.00421867	0.078272	18	6	19863.2	0.829538	1	20	6	47672.2	0.0232899	0.365636	19	6.01667	28778.2	21578.7	0.749829	13248	6886	9366	11895	40145	35427	53630	61487	9675	16255	20569	5121	22598	28371	23234	60705	26163.2
PC P-42:5 or PC O-42:6 Isomer A	0.00421867	0.078272	18	15	698.621	0.615665	1	20	12	1907.5	0.0180597	0.317016	19	13.6167	1203.96	912.734	0.758107	1750	1274	1233	1192	725	720	504	708	1700	2424	2583	923	665	898	621	1202	1195.12
PEtOH 34:0|PEtOH 16:0_18:0	0.00421867	0.078272	24	15	18978.9	0.336724	1	26.1721	12	61287.5	0.0107346	0.265798	25.0861	13.5904	42042	18597.5	0.442356	18578	21673	14584	21384	31897	31397	33134	35511	26112	74903	107517	36618	72692	33357	41112	78242	42419.4
TG 60:1	0.00421867	0.078272	24	15	5711.3	0.499124	1	21.995	12	31633	0.015083	0.304985	22.9975	13.4602	19094.8	14017	0.734077	9647	7958	7868	10579	10556	12508	10445	14450	11817	41248	60769	12698	22750	14696	15644	38271	18869
unknown1113	0.00421867	0.078272	24	18	3096.42	0.0947407	1	20.5594	12	7679	0.00352711	0.21957	22.2797	14.8569	4108.35	4688.39	1.14119	2157	2598	1896	2561	730	1072	778	1989	3651	8555	12220	6290	7964	3424	3130	7205	4138.75
unknown1125	0.00421867	0.078272	18	6	10711.6	0.762639	1	20	6.00001	36161.5	0.0216822	0.365636	19	6.01667	26832.7	9985.65	0.372145	26269	17687	16852	18283	33872	30916	38070	41788	15894	18992	22795	10726	26260	27948	19311	44299	25622.6
unknown1234	0.00421867	0.078272	24	18	6916.21	0.149823	1	21.0501	12	17003.2	0.00528809	0.21957	22.5251	14.8673	8884.77	10452.6	1.17646	3384	4935	3251	4892	1726	2482	1682	3768	6996	18028	30224	12765	16924	6790	6740	18326	8932.06
unknown1254	0.00421867	0.078272	18	6	4465.03	0.949893	1	20	6	12299	0.0261261	0.39102	19	6.01667	8116.58	4833.33	0.595488	5098	3497	3077	3222	12194	9346	11681	15975	3117	3923	6209	2285	9473	7574	6872	16951	7530.88
unknown1283	0.00421867	0.078272	24	3	81909.5	0.111328	1	21.1511	6.63e-05	384324	0.00406886	0.21957	22.5755	1.41101	310888	98740.8	0.317609	449052	413925	331932	342387	331851	354421	343937	402327	309576	160895	179637	193759	314271	282903	217859	399553	314268
unknown1289	0.00421867	0.078272	18	6	20638.7	0.797731	1	20	6	60211.2	0.0225285	0.365636	19	6.01667	42182.6	20317.9	0.481665	29854	24716	22887	24675	57887	50743	58791	73424	17318	29332	44836	16196	43738	38186	34250	68695	39720.5
unknown1331	0.00421867	0.078272	18	6	2092.86	0.841047	1	20	6	6181.75	0.0235642	0.367372	19	6.01667	4345.11	2067.02	0.475712	3166	2613	2331	2470	6782	5117	5395	7433	1632	2708	4687	1787	4526	4223	3464	7180	4094.62
unknown1342	0.00421867	0.078272	24	18	5837.17	0.172649	1	20.8511	12	16296.2	0.00599049	0.21957	22.4255	14.8626	8508.68	9909.93	1.16468	3725	4543	3584	4382	1486	2304	1498	4114	6500	18587	29308	10790	15279	6473	6577	17824	8560.88
unknown1411	0.00421867	0.078272	24	18	6065.92	0.165048	1	20.8511	12	16002.8	0.0057581	0.21957	22.4255	14.8626	8403.22	9546.69	1.13607	3641	4926	3351	4251	1670	2372	1612	4500	6142	17515	28455	11899	16076	6164	6586	16096	8453.5
unknown1457	0.00421867	0.078272	18	6	7634.28	0.868028	1	20	6	22188.5	0.0242045	0.374752	19	6.01667	15586.6	7487.52	0.480382	11279	8830	8202	9038	20732	18256	21421	28345	6309	10614	17473	5928	16264	13868	12053	26256	14679.2
unknown1577	0.00421867	0.078272	24	15	15156.5	0.435305	1	23.0287	12	62618.5	0.0134057	0.287294	23.5144	13.4748	37564.4	27568	0.733887	15129	14489	13035	16942	23803	25797	23403	29500	22828	69377	125357	32912	56479	25496	31767	71070	37336.5
unknown1600	0.00421867	0.078272	24	15	2951.64	0.380111	1	23.1496	12	11277.2	0.0119233	0.266897	23.5748	13.4773	6890.79	4856.99	0.704852	2999	2699	2515	3187	4203	4846	5133	5666	3744	13892	20741	6732	10035	5053	5450	12792	6855.44
unknown1653	0.00421867	0.078272	24	15	2134.4	0.497592	1	21.7778	12	10422	0.0150431	0.304985	22.8889	13.4589	6547.57	4415.5	0.674372	3566	3537	2923	4013	4006	4316	4259	5414	4208	11042	20077	6361	9378	4423	4677	11318	6469.88
unknown1664	0.00421867	0.078272	24	18	18725.6	0.161107	1	20.9501	12	37374.2	0.00563703	0.21957	22.4751	14.8649	16373.7	26701.8	1.63078	0	4408	3864	8903	0	0	0	0	13317	37551	72147	26482	37542	5352	14303	40198	16504.2
unknown339	0.00421867	0.078272	24	15	2476.46	0.441302	1	20.9501	12	17118.2	0.0135649	0.287294	22.4751	13.4602	10046.1	8450.6	0.84118	4959	3346	5046	6580	6396	6181	7931	7694	7772	21621	31567	7513	10106	6814	6982	17170	9854.88
unknown950	0.00421867	0.078272	18	6	6081.83	0.706562	1	20	5.99999	12871.5	0.0203155	0.348156	19	6.01666	7685.3	5964.7	0.776118	3554	1613	2040	2960	11727	10323	14900	14536	1888	5462	6453	1031	6008	9095	6410	13400	6962.5
unknown990	0.00421867	0.078272	24	18	1959.39	0.181472	1	20.5594	12	5958.25	0.00625845	0.21957	22.2797	14.8569	3317.22	3339.04	1.00658	1640	2360	1465	2251	994	1379	878	1740	2881	6730	10127	4095	5332	2405	2385	6760	3338.88
Cer 34:1;3O|Cer 15:1;2O/19:0;O	0.0065055	0.098019	18	6	10687.9	0.877383	1	20	6	20939.8	0.0351939	0.44724	19	6.01667	12224.6	10122	0.827997	3824	1982	2895	2941	19773	16976	23017	23993	2937	4687	4629	1787	12303	14821	13834	25570	10998.1
Cer 38:0;2O	0.0065055	0.098019	18	6	4388.66	0.753475	1	20	6	11817.8	0.0309699	0.434547	19	6.01667	7861.11	4390.01	0.558447	5421	4252	3791	4612	11957	9032	10175	16107	2688	5223	9542	2344	6866	6376	5546	13334	7329.12
PE-Cer 34:0;2O|PE-Cer 14:0;2O/20:0	0.0065055	0.098019	18	6	4363.56	0.960704	1	20	6	13899.2	0.0379691	0.463264	19	6.01667	9652.58	4947.83	0.512592	6569	5094	4053	4399	14040	10004	13479	18074	4737	5417	7095	3613	10441	11011	8830	17992	9053
PE-Cer 34:1;2O|PE-Cer 14:1;2O/20:0	0.0065055	0.098019	18	6	48577.2	0.834684	1	20	6	132390	0.033752	0.445726	19	6.01667	88338.6	50240.5	0.568726	66420	42270	36590	37476	132927	104427	122379	169828	41262	56244	81878	27742	87419	81591	68967	158587	82250.4
TG 62:1	0.0065055	0.098019	24	15	3410.38	0.536385	1	23.1496	12	15897.8	0.0232328	0.365636	23.5748	13.4773	10236.5	6116.05	0.597474	5260	4371	4957	5625	7824	6983	5710	8791	6303	21168	29945	6175	12040	9014	9251	19655	10192
unknown1146	0.0065055	0.098019	18	6	2195.57	0.958379	1	20	6	8327.5	0.0378923	0.463264	19	6.01667	6590.15	1982.8	0.300873	6110	4805	4154	4403	8095	7065	8061	10089	4111	5272	7046	3282	7132	6460	5628	9885	6349.88
unknown1190	0.0065055	0.098019	24	15	3897.75	0.530711	1	22.2166	12	19202.5	0.0230237	0.365636	23.1083	13.4622	11610.2	8515.48	0.733447	5283	5894	3943	6063	6740	7289	7769	9012	5570	23210	38454	9576	16892	7641	9517	20931	11486.5
unknown1206	0.0065055	0.098019	24	15	53374.4	0.493346	1	23.6461	12	222890	0.0216371	0.365636	23.8231	13.4896	145156	84363.2	0.581188	63035	78715	56535	80238	105038	103411	112918	123183	83747	242921	432983	131909	224932	107499	123116	248148	144896
unknown1277	0.0065055	0.098019	24	15	1311.33	0.522345	1	21.995	12	7145	0.0227148	0.365636	22.9975	13.4602	4327.04	3172.23	0.733119	2105	2271	1567	2220	2328	2766	2913	3302	2136	8916	13966	3562	5984	3004	3272	8103	4275.94
unknown1332	0.0065055	0.098019	24	18	5394.87	0.225698	1	20.2759	12	17285	0.0110468	0.265798	22.1379	14.8527	8822.37	10345.5	1.17265	4316	5214	4164	5289	890	3158	1215	5106	6922	19435	32306	10477	14441	6087	6145	17289	8903.38
unknown1385	0.0065055	0.098019	24	18	9723.07	0.178132	1	20.6557	12	26756.5	0.00899297	0.265798	22.3279	14.8587	13919.5	16107.5	1.15719	6137	8215	5813	7916	2543	4144	2867	6703	10864	29237	48260	18665	26021	9815	10179	26896	14017.2
unknown1442	0.0065055	0.098019	24	15	5050.86	0.412014	1	22.9091	12	21572.8	0.0185529	0.320394	23.4545	13.4724	12867	9813.23	0.762669	5153	4751	4529	5566	7990	8864	9543	10851	7364	26983	40850	11094	18202	8825	10185	23672	12776.4
unknown1491	0.0065055	0.098019	18	6	1029.9	0.984357	1	20	5.99999	2594.75	0.0387482	0.470214	19	6.01666	1671.92	1104.64	0.6607	794	546	390	606	2222	1816	2328	4013	428	1094	1427	382	2200	1377	1688	3298	1538.06
unknown1535	0.0065055	0.098019	24	15	20486.5	0.330171	1	22.1053	12	66600.8	0.0153432	0.304985	23.0526	13.4611	32719.2	36087.2	1.10293	5570	7223	4471	6583	4888	7512	3520	13946	18279	72620	142214	33290	60704	20493	19104	94239	32166
unknown1583	0.0065055	0.098019	24	15	1768.83	0.403286	1	22.2166	12	7824.5	0.018216	0.317016	23.1083	13.4622	4983.99	3212.8	0.644623	2757	2704	2168	2923	2986	3214	3649	4473	2868	9487	13614	5329	6741	3612	3703	8769	4937.31
unknown1588	0.0065055	0.098019	18	12	852.417	0.11309	1	20	12	10035.5	0.00604361	0.21957	19	12.0333	4931.52	5405.58	1.09613	2156	2780	2648	2592	2876	3341	2391	2217	3076	12791	13514	10761	1122	2441	1372	2609	4292.94
unknown1590	0.0065055	0.098019	18	12	1955.86	0.319746	1	20	12	28802.5	0.0149255	0.304985	19	12.0333	11203.9	18300.6	1.63341	3444	1829	1917	3705	2738	3471	2113	3015	3849	47264	53497	10600	743	2070	1102	3315	9042
unknown1621	0.0065055	0.098019	24	18	1972.12	0.340179	1	21.5648	12	6414.75	0.0157422	0.304985	22.7824	14.8822	3114.13	4131.13	1.32658	961	1084	672	835	425	604	246	1213	1637	6994	13725	3303	6516	2096	1618	8090	3126.19
unknown699	0.0065055	0.098019	24	15	1153.64	0.502891	1	20.2759	12	10331	0.021993	0.365636	22.1379	13.4691	5820.87	5515.32	0.947508	2784	2707	2588	3726	3026	3562	4542	4772	4624	12314	20325	4061	4449	4004	3744	9625	5678.31
unknown73	0.0065055	0.098019	18	15	3084.4	0.514225	1	20	12	10696.5	0.0224141	0.365636	19	13.6167	6655.06	4711.47	0.707952	7898	4973	6128	9828	4804	4644	3296	5599	7195	12863	12247	10481	3452	3386	3477	5480	6609.44
unknown775	0.0065055	0.098019	18	6	9199.81	0.102153	1	20	6	29784.2	0.00552668	0.21957	19	6.01667	20408.8	8481.57	0.415584	20259	15833	21795	16661	27871	28707	33926	28633	19906	6200	7160	6235	14083	19316	16204	27307	19381
unknown865	0.0065055	0.098019	18	6	2286.61	0.905744	1	20	5.99999	5172	0.0361441	0.453315	19	6.01666	3286.63	2199.73	0.669297	1620	1014	989	1482	5186	4186	5393	5923	1367	2501	2242	486	2614	3442	3089	6787	3020.06
unknown905	0.0065055	0.098019	24	15	2019.85	0.534521	1	20.7529	12	15830.8	0.0231642	0.365636	22.3765	13.462	8777.19	8547.77	0.973862	4745	2784	3169	4821	4876	5307	6571	7665	5980	19467	31694	6182	7733	5640	4841	15724	8574.94
Cer 34:0;2O|Cer 14:0;2O/20:0	0.00980952	0.11904	18	6	10887	0.950849	1	20	6	21861	0.052931	0.543549	19	6.01667	13965.9	9424.92	0.674854	5356	3722	4257	4898	21005	19556	23726	23157	4558	7039	6556	4245	15965	17455	18281	25404	12823.8
Cer 36:0;2O|Cer 14:0;2O/22:0	0.00980952	0.11904	18	6	13967.5	0.884798	1	20	5.99999	32764.5	0.049879	0.543549	19	6.01666	20321.3	14422.3	0.709711	10152	5387	6580	7956	28635	25201	35406	41816	6114	13815	18201	3189	14905	22062	15569	42190	18573.6
TG 58:5	0.00980952	0.11904	24	15	1763.17	0.548274	1	20.6557	12	16458.8	0.033482	0.445726	22.3279	13.4632	9501.68	8407.64	0.884859	4744	4410	3863	6135	6528	5902	6575	7237	6610	20109	32737	6379	9046	6169	6628	15707	9298.69
unknown105	0.00980952	0.11904	18	6	22313.8	0.909085	1	20	6	49738	0.0510067	0.543549	19	6.01667	28874.7	24184.7	0.837573	9907	5477	5905	6768	46256	36388	52243	64065	6804	13461	14943	3686	24962	30905	24100	69234	25944
unknown1215	0.00980952	0.11904	18	6	5665.52	0.980553	1	20	6	19915	0.0542887	0.550391	19	6.01667	15016.8	5731.28	0.381657	10931	9857	8814	9147	19659	16071	18859	25071	8350	12062	15547	5862	15135	13861	13776	26155	14322.3
unknown1272	0.00980952	0.11904	18	12	1712.61	0.127937	1	20	12	7112.75	0.00963919	0.265798	19	12.0333	4488.32	2879.75	0.641609	4061	2768	2769	3696	4496	3994	2898	2855	3925	7909	7937	8680	2016	3296	2207	2863	4148.12
unknown1456	0.00980952	0.11904	24	15	6606.5	0.551687	1	23.1496	12	27698.8	0.0336569	0.445726	23.5748	13.4773	15629.3	12156.3	0.777788	3668	5569	3958	5490	4964	6966	4770	11669	8013	29537	61829	11416	27908	9493	9182	44221	15540.8
unknown1470	0.00980952	0.11904	24	15	10777.7	0.517755	1	23.6461	12	41131	0.0319091	0.444944	23.8231	13.4896	24537.5	16115	0.656749	7516	9661	7254	10138	9178	11966	8400	20752	13129	46572	85617	19206	43799	16449	14956	67210	24487.7
unknown1483	0.00980952	0.11904	24	15	3539.42	0.535741	1	23.1496	12	14417	0.0328382	0.445726	23.5748	13.4773	8401.7	6030.41	0.71776	2468	3330	2408	3337	2949	3934	2729	6926	4511	16134	30656	6367	14809	5317	4943	22907	8357.81
unknown1511	0.00980952	0.11904	24	15	9347.95	0.444612	1	21.5648	12	34672.2	0.0280656	0.406499	22.7824	13.4583	15955.1	20757.5	1.301	1840	2708	1708	2431	1687	2697	1289	4834	8259	32530	83023	14877	27197	8620	8063	47210	15560.8
unknown1556	0.00980952	0.11904	24	15	3862.22	0.419399	1	21.0501	12	16411.8	0.0267142	0.393213	22.5251	13.4595	7486.32	10263.9	1.37101	1126	1640	1042	1627	970	1729	783	2600	3236	18607	37330	6474	12235	4202	3374	19180	7259.69
unknown1561	0.00980952	0.11904	24	18	6600.49	0.460751	1	21.5648	12	26538.5	0.0289232	0.410966	22.7824	14.8822	12102.1	17157	1.41769	1711	2538	1993	2496	1296	2442	1174	4077	5731	26442	63459	10522	22301	7509	5957	34787	12152.2
unknown1603	0.00980952	0.11904	24	15	11383.7	0.381105	1	21.253	12	47027	0.024633	0.378233	22.6265	13.4585	21851.1	28553.2	1.30671	3530	4874	3516	4734	2621	5243	2192	7567	10022	54734	103927	19425	39064	12932	10269	55413	21253.9
unknown193	0.00980952	0.11904	18	6	5943.94	0.854758	1	20	6	11125.2	0.0484752	0.53398	19	6.01667	6182.02	5696.73	0.9215	1376	853	1117	1051	10856	8910	11220	13515	1159	2332	2576	0	5000	7202	6241	14459	5491.69
unknown304	0.00980952	0.11904	18	6	1342.27	0.996337	1	20	6	8805.25	0.0550065	0.550391	19	6.01667	7763.18	1225.86	0.157907	7053	5607	6727	6816	9059	7882	9779	8501	7106	6578	6890	5206	7248	8748	7922	10712	7614.62
unknown37	0.00980952	0.11904	18	6	4072.76	0.794324	1	20	6	7504.75	0.0456192	0.527997	19	6.01667	4158.26	3814.15	0.917246	1154	843	616	808	7189	6059	8058	8713	1083	1248	1400	0	3784	4833	4039	9310	3696.06
unknown63	0.00980952	0.11904	18	6	4873.56	0.714297	1	20	5.99999	11781.2	0.0417672	0.48932	19	6.01666	7681.79	4649.39	0.605248	5147	3272	2585	4497	8991	13158	13658	11318	2692	5689	8936	1585	7388	5300	7488	12190	7118.38
unknown660	0.00980952	0.11904	18	6	2374.29	0.943629	1	20	6	5743	0.0525996	0.543549	19	6.01667	3710.92	2369.28	0.638461	1872	1095	1680	1464	5205	4645	6285	6837	1830	2221	2293	889	3764	3578	2994	8129	3423.81
unknown719	0.00980952	0.11904	18	6	2421.31	0.936602	1	20	6	6342.75	0.0522766	0.543549	19	6.01667	3971.63	2773.83	0.698411	1757	1133	1173	1403	5953	4521	6343	8554	1374	1961	1918	1121	3722	4661	4623	7951	3635.5
unknown722	0.00980952	0.11904	18	6	7118.44	0.82763	1	20	6	13425.5	0.0471985	0.533026	19	6.01667	7375.44	6928.22	0.939364	1723	1000	1160	1126	14592	10545	14231	14334	1519	1787	1939	0	6868	8775	8144	16831	6535.88
unknown744	0.00980952	0.11904	18	6	12635.3	0.904541	1	20	6	29205	0.0507962	0.543549	19	6.01667	19219	11696.3	0.608576	10823	6775	7730	7552	25334	25686	32147	33653	8538	11735	11397	5705	20827	22172	20897	33856	17801.7
unknown985	0.00980952	0.11904	18	6	1681.32	0.999758	1	20	6	6998.75	0.0551617	0.550391	19	6.01667	5985.94	1289.4	0.215404	4912	4787	4029	3943	6935	6920	6736	7404	3858	4683	5391	3721	8305	6836	6025	8790	5829.69
unknown891	0.0121536	0.137913	18	6	3218.04	0.885186	1	20	5.99999	7036.75	0.0595154	0.570138	19	6.01666	3845.23	3744.8	0.973882	0	507	173	812	6746	4551	8637	8213	715	2033	0	1669	3450	4341	3609	8807	3391.44
CAR 16:0	0.0144977	0.137913	24	12	4567.56	0.546429	1	21.6708	12	41076.8	0.0462494	0.530096	22.8354	12.0313	26687.5	13905.8	0.521062	17341	13895	10589	17846	22532	20838	20146	32113	20563	49368	73777	20599	19686	21278	18460	39855	26180.4
Cer 38:1;2O|Cer 16:1;2O/22:0	0.0144977	0.137913	18	6	878.227	0.579026	1	20	6	3091	0.048522	0.53398	19	6.01667	2154.63	1000.59	0.464389	1909	1417	1300	1345	2541	2545	3033	4245	1126	1510	2217	877	1919	1937	1393	3220	2033.38
Cer 38:1;3O	0.0144977	0.137913	18	6	12039.2	0.891696	1	20	5.99999	33335.8	0.0691417	0.598523	19	6.01666	22687.7	12005.7	0.529171	16170	11790	11894	12381	29080	25684	32166	46413	8353	16132	29007	6804	20060	17144	14652	41996	21232.9
LPE 20:0	0.0144977	0.137913	18	6	7128.34	0.995237	1	20	5.99999	20279.8	0.0755851	0.598523	19	6.01666	12931.4	8905.67	0.688687	4996	3940	2831	3456	20183	13020	17425	30491	3757	6294	9627	3348	15457	12561	11634	30615	11852.2
PC 35:4	0.0144977	0.137913	18	12	114.905	0.37735	1	20	12	710	0.0339641	0.445903	19	12.0333	406.618	324.783	0.798744	253	219	186	293	299	330	218	388	247	469	833	1291	143	184	174	365	368.25
TG 58:2	0.0144977	0.137913	24	15	4989.52	0.548297	1	22.2166	12	26840.2	0.0463804	0.530096	23.1083	13.4622	17307.6	10603.1	0.612628	9312	7962	9876	10704	9798	13531	11346	13428	13221	31235	52130	10775	20649	14356	14755	31379	17153.6
TG 60:5	0.0144977	0.137913	24	15	692.258	0.470038	1	21.6708	12	3628.75	0.0408099	0.482201	22.8354	13.4585	2242.79	1603.63	0.715016	1344	743	1208	1392	1584	1457	1229	1997	1965	4548	6758	1244	1854	1881	2571	3640	2213.44
TG 62:2	0.0144977	0.137913	24	15	3746.61	0.453608	1	21.7778	12	18204.8	0.0396174	0.47562	22.8889	13.4589	10909.9	8225.18	0.753921	5220	4816	4631	6290	5764	7316	4803	8868	7101	23221	34594	7903	13170	8264	9217	21064	10765.1
unknown119	0.0144977	0.137913	18	6	12907.2	0.985371	1	20	6	31064.8	0.0749782	0.598523	19	6.01667	20395.9	12785.7	0.626877	10891	5680	6381	8428	28282	23164	34723	38090	7872	14535	18052	4293	17507	20783	16209	46654	18846.5
unknown1211	0.0144977	0.137913	24	21	9314.72	0.0919836	1	23.3952	17.9999	55716.9	0.0101616	0.265798	23.6976	19.484	48131.4	9123.43	0.189553	56732	54194	44024	56234	46185	40921	31506	39147	50539	44432	35772	49463	56034	54835	55949	56050	48251.1
unknown1282	0.0144977	0.137913	24	15	47010.9	0.484439	1	23.52	12	203907	0.0418483	0.48932	23.76	13.4862	132066	78252.3	0.592525	64931	67294	52170	69722	93606	95455	96578	114184	85527	228363	393178	108561	199980	93828	114720	229728	131739
unknown1335	0.0144977	0.137913	18	15	2898.08	0.550236	1	20	12	14479.2	0.0465162	0.530096	19	13.6167	6667.12	8208.63	1.23121	5014	5513	3416	6429	1584	1655	1245	3639	4629	14899	31602	6787	6186	2496	2046	8262	6587.62
unknown1339	0.0144977	0.137913	24	3	36972.1	0.0926016	1	20.2759	6.63e-05	156970	0.0102208	0.265798	22.1379	1.38366	121571	51931.4	0.427168	189938	161525	142232	134185	123653	140483	151006	171403	124047	46688	48891	52493	128819	118453	87746	163759	124083
unknown1390	0.0144977	0.137913	24	18	6030.56	0.167727	1	20.464	12	15457.5	0.0170682	0.31153	22.232	14.8554	7903.87	9738.37	1.2321	3333	5224	3606	4431	255	1324	247	5414	6306	18464	27139	9921	14612	5998	5864	15402	7971.25
unknown1412	0.0144977	0.137913	24	18	2664.02	0.29623	1	20	12	9799	0.0277022	0.403841	22	14.85	4314.92	6164.38	1.42862	1922	2110	1583	2414	529	883	694	1832	3643	10449	20353	4751	5912	2550	1897	8434	4372.25
unknown1424	0.0144977	0.137913	18	6	1123.95	0.996195	1	20	5.99998	3709.25	0.075644	0.598523	19	6.01666	2658.66	1108.15	0.416809	3374	1256	1130	1593	4015	2667	2146	6009	940	725	1768	747	1802	3212	1433	7573	2524.38
unknown1443	0.0144977	0.137913	24	18	3930.28	0.108649	1	20.5594	12	8507.75	0.0117403	0.266897	22.2797	14.8569	4023.22	5286.58	1.31402	1244	1868	1345	1952	783	888	623	1500	3099	8621	14843	7468	7271	2987	3096	7332	4057.5
unknown1451	0.0144977	0.137913	18	6	2346.53	0.982266	1	20	5.99999	7646.25	0.0747869	0.598523	19	6.01666	5753.66	2218.54	0.385588	4317	3921	3202	3326	7545	6042	7294	9704	3095	4649	6121	2382	5880	5225	4967	10087	5484.81
unknown1475	0.0144977	0.137913	18	9	1261.3	0.852075	1	20	6	4357.5	0.0666309	0.598523	19	7.6	3307.02	1012.42	0.306143	2130	1583	1914	1527	3861	3580	4781	5208	2485	3659	3666	2098	2627	3137	2207	5265	3108
unknown162	0.0144977	0.137913	18	6	3792.92	0.944736	1	20	6	9579.5	0.072463	0.598523	19	6.01666	6278.88	3896.07	0.620505	3067	2129	2343	2671	8923	7486	11081	10828	2849	3552	4188	1838	5483	8648	5956	11866	5806.75
unknown1669	0.0144977	0.137913	18	9	4392.19	0.861729	1	20	6	8483	0.0672452	0.598523	19	7.6	4491.59	3248.23	0.723179	370	245	195	78	5759	8470	12373	7330	352	2199	7126	460	1468	229	2144	12851	3853.06
unknown280	0.0144977	0.137913	18	6	7483.49	0.978622	1	20	5.99999	20130	0.0745621	0.598523	19	6.01666	13863	7519.42	0.542409	8545	4913	5263	6943	19788	15484	20349	24899	7400	10002	11238	4099	11657	16674	13297	26678	12951.8
unknown289	0.0144977	0.137913	18	6	6255.77	0.779839	1	20	5.99999	14297.8	0.0619838	0.583082	19	6.01666	8165.95	7021.17	0.859811	3474	1534	1404	2373	12318	10254	17661	16958	2195	4973	5844	915	5200	8220	5819	17900	7315.12
unknown384	0.0144977	0.137913	18	6	2918.58	0.99308	1	20	6.00002	10104.5	0.0754526	0.598523	19	6.01667	7817.28	2778.68	0.355453	6001	3853	4763	5274	9401	8147	11263	11607	4988	6837	7418	3582	7504	9095	7293	12663	7480.56
unknown662	0.0144977	0.137913	18	15	367.342	0.999257	1	20	12	3273	0.075832	0.598523	19	13.6167	3032.19	503.68	0.166111	3344	3334	3279	3632	2663	3049	2408	2638	3206	3458	3077	3351	2698	2850	2391	3059	3027.31
unknown700	0.0144977	0.137913	18	6	34533.7	0.885735	1	20	5.99999	79408.8	0.0687656	0.598523	19	6.01666	43432.2	41618.9	0.95825	14183	4067	4074	6072	62869	51576	86369	116821	6495	21967	37923	1868	24963	38795	24991	111188	38388.8
unknown86	0.0144977	0.137913	18	6	30715.1	0.961927	1	20	6.00001	74350	0.0735301	0.598523	19	6.01667	47338.4	32033.3	0.676688	23878	12461	13610	17797	65589	53922	85747	92142	17492	32372	41928	9100	37743	47086	38933	105505	43456.6
unknown89	0.0144977	0.137913	18	6	13091.6	0.731704	1	20	5.99999	30276.5	0.0588337	0.566874	19	6.01666	17062	15022.4	0.880459	8718	1815	3333	4655	26308	20371	36172	38255	4606	9151	13558	1869	11245	16045	11112	36653	15241.6
unknown99	0.0144977	0.137913	18	6	4240.17	0.922376	1	20	6	13842.2	0.0710682	0.598523	19	6.01667	10481.3	3895.01	0.371615	8211	5929	5499	8619	11863	13168	15999	14339	5304	9697	12609	4508	10094	8793	9787	15730	10009.3
CAR 12:1	0.0210199	0.163853	24	3	671.928	0.269594	1	28	4.94e-05	1732.25	0.0349821	0.44724	26	1.62502	1090.84	61.0971	0.056009	1315	1958	1502	2154	1656	872	1402	1069	2077	591	370	366	428	473	532	670	1089.69
CAR 16:1	0.0210199	0.163853	24	15	6182.59	0.666698	1	23.9024	12	18485.5	0.0738211	0.598523	23.9512	13.497	10398.6	9628.88	0.925979	2201	3029	1910	2473	8815	3484	2510	21045	5423	17429	39707	11383	5945	5544	11619	23728	10390.3
Cer 32:2;2O|Cer 14:2;2O/18:0	0.0210199	0.163853	18	6	3329.77	0.874252	1	20	6	14174.8	0.0918222	0.678766	19	6.01667	11226.8	3238.49	0.28846	11811	8677	7198	7631	12976	12332	12889	18502	8367	8026	12461	6856	11978	9101	9023	15522	10834.4
Cer 38:1;3O|Cer 16:1;2O/22:0;(2OH)	0.0210199	0.163853	18	6	10296.9	0.839428	1	20	5.99999	28795	0.0888818	0.667357	19	6.01666	19411.9	10563.6	0.544183	13171	9923	10093	10700	27057	21403	28772	37948	7569	14045	22770	6165	16725	15392	12422	35954	18131.8
LPC 20:0	0.0210199	0.163853	24	12	2259.74	0.708461	1	26.1721	12	12262.2	0.0775406	0.606546	25.0861	12.0225	8549.73	3432.6	0.401486	4789	3116	3355	4434	7417	5475	7623	13748	8047	15000	20495	5507	6478	6523	6496	20275	8673.62
PE-Cer 35:1;2O|PE-Cer 17:0;2O/18:1	0.0210199	0.163853	18	6	427.976	0.896137	1	20	6	1659.25	0.093655	0.678766	19	6.01667	1270.58	427.159	0.336193	1151	1014	745	876	1665	1273	1620	2079	808	1013	1277	588	1210	1181	950	2051	1218.81
PI 38:1|PI 20:0_18:1	0.0210199	0.163853	18	6	4514.52	0.916396	1	20	6	13287.5	0.0953417	0.678766	19	6.01667	9123.69	4656.86	0.510414	6900	4526	4152	5735	13286	10231	13283	16350	4862	6657	7738	1262	7648	9907	6204	18209	8559.38
TG 59:2	0.0210199	0.163853	24	15	815.117	0.57365	1	20.8511	12	8160	0.0653308	0.598523	22.4255	13.461	5215.28	3464.01	0.664204	3017	2936	3537	3401	3382	3534	3451	3666	4006	9575	15672	3387	5872	4088	4064	8573	5135.06
unknown1163	0.0210199	0.163853	18	15	8244.87	0.294684	1	20	12	45056.8	0.0376865	0.463264	19	13.6167	23398.1	21595.4	0.922956	12786	16047	11983	15853	5034	8584	5932	12553	19662	49834	85936	24795	32592	12057	13898	43477	23188.9
unknown1244	0.0210199	0.163853	18	6	1432.6	0.979382	1	20	5.99999	3931	0.100526	0.683378	19	6.01666	2645.67	1529.6	0.578151	1469	940	1097	1184	3755	2940	4143	4886	1402	1775	2180	818	2012	2802	2161	5801	2460.31
unknown1346	0.0210199	0.163853	18	6	1611.14	0.910643	1	20	6.00001	7600.75	0.0948637	0.678766	19	6.01667	6334.6	1350.59	0.213208	6488	5791	4218	5054	7328	7171	7322	8582	4888	4583	6584	3872	6512	6195	4936	9211	6170.94
unknown1402	0.0210199	0.163853	18	6	4196.68	0.791424	1	20	6	12919	0.0847786	0.647374	19	6.01666	9305.67	4052.18	0.435453	8231	5897	4799	5489	12078	10971	12218	16409	5099	6880	10508	4133	9111	7916	6616	14679	8814.62
unknown1410	0.0210199	0.163853	24	3	16426.6	0.10107	1	20.464	5.02e-05	65733	0.015199	0.304985	22.232	1.38953	51502.8	20430.7	0.396691	81259	69458	55197	57018	56807	63335	58805	70964	47794	25201	26049	21265	51594	46236	34526	73305	52425.8
unknown1468	0.0210199	0.163853	24	3	8880.91	0.109594	1	20.5594	6.63e-05	35778.2	0.0162944	0.304985	22.2797	1.39252	26034.4	14105.9	0.541817	44961	36175	31429	30548	24746	28948	35125	36451	27143	6764	7245	7596	30098	23969	17354	37838	26649.4
unknown1542	0.0210199	0.163853	24	15	1473.43	0.486994	1	21.4599	12	8030	0.0571383	0.557231	22.7299	13.4582	4895.05	3684.77	0.752753	2504	2407	2061	3012	3192	3309	3273	4384	2674	10402	14547	4497	6217	2949	3477	8257	4822.62
unknown1547	0.0210199	0.163853	24	15	1041.57	0.61037	1	21.253	12	7030.5	0.0687166	0.598523	22.6265	13.4585	4156.19	3353.32	0.806824	2154	2193	1573	2307	2290	2561	2561	3236	2265	7468	14827	3562	5352	2461	2894	7673	4086.06
unknown1574	0.0210199	0.163853	18	3	6736.25	0.532057	1	20	6.63e-05	16397.5	0.0614357	0.581954	19	1.58336	12088.5	9054.07	0.748979	19317	23030	12568	10675	9605	7458	23904	11597	11347	2310	557	1831	35423	12112	13761	22490	13624.1
unknown1582	0.0210199	0.163853	18	15	2315.42	0.957424	1	20	12	8186.75	0.0987287	0.678766	19	13.6167	4917.73	4302.64	0.874924	6395	7158	4670	5389	2404	1984	2212	3536	4368	6893	16830	4656	3788	1837	1763	4134	4876.06
unknown159	0.0210199	0.163853	18	6	38821.9	0.805129	1	20	6	89155	0.0859562	0.654141	19	6.01667	48788.7	46405.2	0.951147	15901	5120	6395	9779	71831	56930	106903	120956	9325	29411	41171	3262	27355	42410	27620	116276	43165.3
unknown1608	0.0210199	0.163853	24	3	1536.19	0.264812	1	20.6557	6.63e-05	5541.24	0.0344612	0.447199	22.3279	1.39553	4036.08	2216.01	0.54905	6342	4266	6806	4751	3589	4041	3366	7513	3564	1003	2021	1266	3416	3900	3365	6858	4129.19
unknown169	0.0210199	0.163853	18	6	2369.16	0.992917	1	20	6	17089.8	0.101629	0.683378	19	6.01667	15401.8	2002.43	0.130013	13157	12945	13425	13903	17376	16495	17671	16817	14285	13132	14043	11065	16236	17828	14783	19385	15159.1
unknown188	0.0210199	0.163853	24	15	5291.28	0.612767	1	20.5594	12	51909.8	0.068936	0.598523	22.2797	13.4645	28896.4	27840.3	0.963452	14016	11394	13020	15175	17450	16735	21922	21005	17388	64004	108557	17690	25186	16603	20250	50988	28211.4
unknown226	0.0210199	0.163853	18	6	2220.49	0.99965	1	20	6	12979	0.102176	0.684733	19	6.01667	11628.8	1663.64	0.143063	12415	8119	8484	10075	12531	13540	13391	12454	10288	10925	10176	7774	12361	13357	12332	14613	11427.2
unknown248	0.0210199	0.163853	24	15	3778.78	0.895254	1	28	12	17066.8	0.0935813	0.678766	26	13.6964	13160.9	4132.1	0.313969	6108	5145	4208	5215	14923	8023	6803	26485	9535	19051	30195	9486	9114	8935	13548	36318	13318.2
unknown346	0.0210199	0.163853	18	6	1210.21	0.992392	1	28	6	21986.5	0.101586	0.683378	23	6.29762	21249.1	58.3393	0.0027455	19658	20257	19915	20202	21640	21545	23242	21519	20517	19888	19482	18219	22761	24565	21530	25013	21247.1
unknown483	0.0210199	0.163853	18	6	1800.82	0.948387	1	20	5.99999	5053	0.097986	0.678766	19	6.01666	3488.83	1849.69	0.530176	2005	1364	1682	1883	5130	3746	5055	6281	2136	2514	2862	988	3248	3820	3188	6333	3264.69
unknown532	0.0210199	0.163853	24	12	6241.99	0.211951	1	24.0327	12	38550.2	0.0285742	0.410966	24.0163	12	30891.1	8020.79	0.259647	26522	18272	22688	25398	31367	25331	26620	42461	34634	35392	45455	38720	25243	28978	27128	40118	30895.4
unknown538	0.0210199	0.163853	18	12	1234.61	0.104901	1	20	12	13007.8	0.0156931	0.304985	19	12.0333	6335.06	6985.18	1.10262	3488	2618	1925	3563	3570	3942	3148	3311	3560	15735	16349	16387	1861	2055	1766	4880	5509.88
unknown652	0.0210199	0.163853	18	6	4415.88	0.954492	1	20	5.99998	11774.5	0.0984879	0.678766	19	6.01666	8239.51	4198.94	0.50961	5648	2978	3923	4387	10805	10040	13859	12394	4562	6648	7791	2300	7070	8838	7404	15044	7730.69
unknown691	0.0210199	0.163853	18	6	2248.25	0.108811	1	20	6	6746	0.0161943	0.304985	19	6.01667	4035.9	2643.45	0.654985	5090	1453	2927	2665	5543	5610	7585	8246	2487	2474	2516	1030	1339	3025	2222	5237	3715.56
unknown764	0.0210199	0.163853	18	6	2190.79	0.965615	1	20	5.99998	5316.5	0.0994005	0.680348	19	6.01666	3533.91	2149.52	0.608253	1830	1356	1115	1263	4525	4448	5918	6375	1532	1941	3168	1353	3471	3217	4022	6841	3273.44
unknown825	0.0210199	0.163853	18	12	1802.95	0.31852	1	20	12	7038.25	0.0402141	0.480216	19	12.0333	4640.96	2694.72	0.580638	5410	3179	3459	5315	3719	3548	2286	3505	5719	8299	8034	6101	2139	1830	2353	4266	4322.62
unknown958	0.0210199	0.163853	24	15	2329.92	0.437283	1	21.8859	12	14058.8	0.0522954	0.543549	22.9429	13.4595	8291.87	6874.28	0.829038	3570	2859	3255	4622	7339	5507	6273	6867	6451	17852	26203	5729	8320	5232	6699	14037	8175.94
unknown961	0.0210199	0.163853	18	6	1626.7	0.904598	1	20	5.99999	5296.75	0.0943606	0.678766	19	6.01666	3907.42	1597.67	0.408882	3011	2460	1950	2667	4669	4939	6166	5413	2620	3131	4056	1355	3344	3633	3460	6547	3713.81
CAR 18:2	0.0299489	0.204986	24	12	1072.33	0.666718	1	24.1644	12	4407.25	0.0981133	0.678766	24.0822	12.0001	2775.13	1785.61	0.643434	1393	940	1298	866	2803	1629	1194	6448	1988	4909	7766	2966	1322	1628	2238	5091	2779.94
Cer 34:0;3O|Cer 14:0;2O/20:0;(2OH)	0.0299489	0.204986	18	6	870.802	0.975012	1	20	6	3079.5	0.132383	0.787253	19	6.01667	2378.08	852.675	0.358556	1582	1568	1371	1632	3199	2607	2551	3961	1324	2215	2995	1248	2482	2108	1980	3573	2274.75
unknown1000	0.0299489	0.204986	18	6	382.191	0.983261	1	28	5.99998	3764	0.133255	0.787253	23	6.29761	3604.25	72.695	0.0201693	3517	3327	2889	3469	3619	3774	3892	3771	3321	2834	3187	2851	4594	4334	3304	5025	3606.75
unknown1105	0.0299489	0.204986	24	6	1423.23	0.160472	1	21.7778	6	4405.5	0.0304597	0.430076	22.8889	6.01417	2921.64	1033.44	0.353719	5801	1660	2842	3104	4128	3829	4641	5024	3161	1789	1866	1328	1098	1904	1128	2859	2885.12
unknown1242	0.0299489	0.204986	18	12	369.463	0.538972	1	20	12	2918.5	0.0827478	0.640582	19	12.0333	2134.39	940.316	0.440554	1955	1486	1234	2190	2484	2365	1507	2208	1675	3423	4514	2062	912	1776	1035	1547	2023.31
unknown1327	0.0299489	0.204986	18	15	4008.41	0.3943	1	20	12	25528.2	0.0642273	0.598523	19	13.6167	13607.4	11784.9	0.866067	7922	8840	6582	9603	3327	5100	3664	8242	9859	28913	50451	12890	18884	7278	7888	26449	13493.2
unknown1368	0.0299489	0.204986	24	18	1779.79	0.334517	1	21.3559	12	6468.5	0.0561366	0.557231	22.678	14.8757	4404.57	2803.35	0.636464	3129	3561	2573	3127	2270	2249	2073	3708	3543	6456	10960	4915	7022	3575	3350	8120	4414.44
unknown1406	0.0299489	0.204986	18	15	1277.03	0.202252	1	20	12	5880	0.0369886	0.46133	19	13.6167	3349.31	2639.61	0.788106	2418	2428	2113	2642	909	1280	743	2618	2917	6315	9870	4418	5049	2211	1984	5265	3323.75
unknown1433	0.0299489	0.204986	18	12	1374.62	0.48108	1	20	12	5574.75	0.0754968	0.598523	19	12.0333	3832.67	2071.1	0.540382	4671	3548	1606	3596	3855	4588	2391	2690	3323	5871	7177	5928	2021	2127	1055	2961	3588
unknown1439	0.0299489	0.204986	18	12	914.289	0.502284	1	20	12	5001.75	0.0781755	0.607281	19	12.0333	3093.94	2179.25	0.704361	3110	2670	1156	2767	2935	3465	1660	1900	2236	6342	7851	3578	1277	1415	650	2372	2836.5
unknown1514	0.0299489	0.204986	18	6	438.76	0.999027	1	28	6	2113.75	0.134915	0.787253	23	6.29762	1902.91	28.2428	0.0148419	1497	1974	1342	1468	2136	2088	1958	2273	1260	1086	1465	1952	2813	2224	1794	3101	1901.94
unknown201	0.0299489	0.204986	18	6	2266.98	0.986494	1	20	6.00001	13461.2	0.133596	0.787253	19	6.01667	11663.2	1953.06	0.167455	10231	8384	10529	11574	13423	12826	14970	12626	9406	10076	12028	7057	10367	11468	10270	17590	11426.6
unknown251	0.0299489	0.204986	18	6	2566.27	0.991394	1	20	6	13246	0.134112	0.787253	19	6.01667	11263.1	2180.07	0.19356	10654	7405	8242	11888	12527	13145	14500	12812	9446	10097	11505	5389	10970	11946	8555	16901	10998.9
unknown270	0.0299489	0.204986	18	6	6283	0.955163	1	20	6.00001	19086.5	0.130276	0.787253	19	6.01667	13297.9	6935.45	0.521546	9338	4981	4956	7198	17807	13854	19979	24706	10043	9840	11902	4527	10534	14205	11161	24288	12457.4
unknown617	0.0299489	0.204986	18	9	2407.35	0.992915	1	20	6	7004	0.134273	0.787253	19	7.6	5029.25	1594.81	0.317107	2781	2217	2064	2084	7231	5673	5954	9158	2714	4838	5837	2215	3903	4350	4124	10309	4715.75
unknown806	0.0299489	0.204986	18	6	661.322	0.982123	1	20	5.99999	5334.25	0.133135	0.787253	19	6.01666	4791.41	567.145	0.118367	4767	3892	4505	4420	4948	4924	6246	5219	3998	3899	4721	3449	4093	5173	4503	6806	4722.69
PE 36:1	0.0419656	0.24924	18	6	448605	0.887545	1	20	6.00002	1.09014e+06	0.159794	0.881421	19	6.01667	693299	465838	0.671915	400027	187289	215147	284788	952847	788076	1241330	1378288	280725	549056	711319	143347	498795	671925	499846	1386775	636849
PI 34:1	0.0419656	0.24924	18	6	119810	0.953205	1	20	6	389271	0.168761	0.901267	19	6.01667	292335	107272	0.36695	261164	204934	171147	201596	389996	334355	376679	456055	168294	253778	372064	46616	275138	252762	209692	495106	279336
TG 42:0	0.0419656	0.24924	18	6	340358	0.963145	1	20	6	814950	0.170101	0.901267	19	6.01667	556336	308567	0.554641	331735	219026	178835	337456	580376	898593	967464	813368	189958	475677	786344	127993	459958	346122	521911	1068287	518944
unknown1027	0.0419656	0.24924	24	15	3406.13	0.603222	1	24.1644	12	15420.2	0.11838	0.754175	24.0822	13.5053	9478.99	6412.89	0.676538	3817	2599	2910	4560	6029	6897	7043	8216	3956	20410	31795	5520	10744	8176	8493	20649	9488.38
unknown1041	0.0419656	0.24924	24	21	637.81	0.466815	1	23.2718	17.9999	4960.25	0.0966329	0.678766	23.6359	19.4815	4198.91	605.455	0.144194	4104	4789	3641	4345	2955	4004	3435	3146	5971	3524	3061	4520	5019	4526	5860	4436	4208.5
unknown1209	0.0419656	0.24924	18	15	4344.11	0.91957	1	20	12	11957.2	0.164192	0.896056	19	13.6167	6846.94	6493.15	0.948328	11728	4941	6345	9710	3021	3017	2924	5096	8333	15463	20362	3671	2596	3107	1889	6342	6784.06
unknown1265	0.0419656	0.24924	24	15	4271.28	0.39227	1	20	12	32869.2	0.0840659	0.646655	22	13.475	17943.6	18401	1.02549	9963	8125	9639	10533	9657	8371	8514	13167	11836	49332	55893	14416	19812	8545	11433	29943	17448.7
unknown1294	0.0419656	0.24924	18	12	697.207	0.542678	1	20	12	4658	0.108908	0.712821	19	12.0333	3710.25	1090.42	0.293894	4190	3687	2284	2975	3893	3806	3240	3136	3243	4366	5108	5915	3021	2798	1918	3723	3581.44
unknown1370	0.0419656	0.24924	18	15	3341.43	0.834157	1	20	12	11648	0.152354	0.858003	19	13.6167	6963.93	5730.11	0.822828	10278	5665	7513	8455	3627	5590	2095	5763	9896	14480	17462	4754	2702	3417	2620	6218	6908.44
unknown1423	0.0419656	0.24924	18	15	2212.54	0.24455	1	20	12	14505	0.057258	0.557231	19	13.6167	10597.5	3852.62	0.36354	12062	9521	8178	8255	7297	6729	8775	11642	13840	13627	18420	12133	11910	8995	6182	11397	10560.2
unknown1434	0.0419656	0.24924	18	15	4026.62	0.921408	1	20	12	18127.8	0.164443	0.896056	19	13.6167	12264.2	7261.09	0.592056	14817	13846	11904	15929	10172	10297	4984	11909	9715	17151	21762	23883	7751	5498	5087	10397	12193.9
unknown1446	0.0419656	0.24924	24	15	1911.84	0.648126	1	21.6708	12	14704.2	0.12524	0.776694	22.8354	13.4585	8091.36	7568.11	0.935333	3099	2146	2560	4003	4160	5024	4078	5248	3989	20678	29839	4311	7192	3909	5852	21157	7952.81
unknown1471	0.0419656	0.24924	18	6	1180.16	0.996237	1	20	5.99998	5813	0.174533	0.901267	19	6.01666	4549.67	1521.87	0.334502	3687	2684	2500	3300	4678	4536	5485	8553	4259	2718	3035	3997	4952	4324	3854	7282	4365.25
unknown1569	0.0419656	0.24924	18	6	1671.25	0.352733	1	20	5.99998	6937.75	0.0771655	0.605722	19	6.01666	5277.95	1615.51	0.306087	5779	4803	4154	3826	6694	5909	7332	7816	3938	3851	5618	2132	5035	4422	3112	6894	5082.19
unknown1587	0.0419656	0.24924	18	6	5252.21	0.838907	1	20	6.00002	11723.5	0.153022	0.858834	19	6.01667	6554.84	6107.33	0.931728	807	1161	908	1064	10738	8215	14567	13374	816	4051	7624	1043	4384	6552	2463	15269	5814.75
unknown1616	0.0419656	0.24924	18	15	2087.2	0.830303	1	20	12	7513.75	0.151811	0.858003	19	13.6167	3861.34	4100.51	1.06194	7581	1742	1819	4556	1607	1729	1528	2782	3734	10393	13748	2180	1464	1730	1183	3370	3821.62
unknown1652	0.0419656	0.24924	24	12	1322.64	0.221482	1	20	12	9873.75	0.0527779	0.543549	22	12.1	4424.62	5694.28	1.28695	1972	1699	972	1947	3195	4455	1436	2695	1923	9216	10026	18330	1240	2261	1459	2593	4088.69
unknown1663	0.0419656	0.24924	18	6	1567.66	0.999999	1	28	6	4558.75	0.175034	0.901267	23	6.29762	3523.6	913.444	0.259236	2423	1923	1720	2406	4325	4772	5398	3740	2304	2156	5285	1799	3082	3068	2835	8638	3492.12
unknown1721	0.0419656	0.24924	24	15	8828.94	0.45299	1	20	12	62715	0.0943425	0.678766	22	13.475	27547.3	43595.6	1.58257	5675	7347	2456	7631	20929	17665	13195	15940	6180	82656	136427	25597	25893	10485	13693	30229	26374.9
unknown239	0.0419656	0.24924	18	9	4358.43	0.998784	1	20	6	30225.8	0.174873	0.901267	19	7.6	26842.2	2866.72	0.106799	23150	19861	20895	23791	30373	26407	30951	33172	25662	27141	29330	18237	24446	26151	23498	37393	26278.6
unknown416	0.0419656	0.24924	18	9	2022.86	0.933354	1	20	6	7106.75	0.166071	0.900552	19	7.6	5455.45	1434.92	0.263025	3760	3359	2196	3870	7269	7830	6447	6881	3983	4923	7224	2736	3981	4354	5313	8648	5173.38
unknown499	0.0419656	0.24924	18	6	19877.5	0.948434	1	20	6	48027.5	0.168116	0.901267	19	6.01667	32085.2	19302.8	0.601609	17353	11083	10231	13844	43304	38354	51656	58796	16081	21324	39779	8329	26665	31816	26126	61197	29746.1
unknown511	0.0419656	0.24924	18	9	1673.01	0.958045	1	20	6	8053.5	0.169414	0.901267	19	7.6	6490.41	1175.31	0.181084	5398	4359	3277	5374	7317	7941	8902	8054	4565	6411	7459	3602	6020	6243	6365	8863	6259.38
unknown578	0.0419656	0.24924	18	6	2016.31	0.77895	1	20	5.99999	5047.25	0.144509	0.831854	19	6.01666	2941.71	2360.87	0.802549	1907	526	672	1239	3606	3560	5665	7358	1324	2128	2258	93	2299	2359	1174	6322	2655.62
unknown724	0.0419656	0.24924	18	15	627.911	0.985786	1	20	12	4097.75	0.173139	0.901267	19	13.6167	3740.21	757	0.202395	3412	5651	3395	4274	2979	3005	2962	3416	4982	3647	3877	3885	3102	4055	3384	3700	3732.88
unknown794	0.0419656	0.24924	24	15	8235.67	0.541819	1	21.5648	12	54320.5	0.108771	0.712821	22.7824	13.4583	31487.6	27024.6	0.858261	13248	10790	11224	19508	23758	17635	26173	23296	18191	69929	106532	22630	30633	23854	20509	57679	30974.3
unknown80	0.0419656	0.24924	18	6	52779.3	0.89044	1	20	6	126378	0.160194	0.881459	19	6.01667	82035.1	52695.8	0.642357	49462	22022	26833	34803	111645	96868	137247	159753	34277	71251	98766	16992	57975	77739	57077	157680	75649.4
unknown812	0.0419656	0.24924	24	15	3055.59	0.555819	1	24.5682	12	12105.5	0.110987	0.724318	24.2841	13.5194	7503.4	4690.96	0.625178	2521	2299	2047	3716	4742	5905	5065	5168	3297	16033	24829	4263	9468	5864	7678	17544	7527.44
unknown817	0.0419656	0.24924	24	12	1898.58	0.250772	1	21.5648	12	9764.25	0.0584503	0.565608	22.7824	12.0344	5842.86	4060.73	0.694991	3336	2148	2101	2965	5100	5923	4072	6842	4432	13948	14737	5940	2086	5654	4694	7038	5688.5
unknown818	0.0419656	0.24924	18	6	2062.28	0.996478	1	20	5.99999	5593.5	0.174566	0.901267	19	6.01666	4003.51	1923.33	0.480412	2118	2535	1530	1996	5552	4418	5899	6505	2469	2922	3560	931	3426	5391	2883	8192	3770.44
unknown833	0.0419656	0.24924	18	15	9776.1	0.465386	1	20	12	48074.8	0.0963971	0.678766	19	13.6167	26222.8	22894.6	0.873079	29019	18731	25795	23821	15030	14789	10159	25549	35700	65848	70717	20034	10997	10594	10957	28277	26001.1
unknown855	0.0419656	0.24924	24	15	1090.36	0.510557	1	20.9501	12	8037.25	0.103769	0.691847	22.4751	13.4602	4420.94	4360.84	0.986406	1782	1499	1330	2786	3082	2410	3159	3441	3049	10080	15987	3033	3780	2501	3103	8134	4322.25
unknown859	0.0419656	0.24924	18	9	1184.05	0.964946	1	28	6	3412	0.170344	0.901267	23	8.21429	2712.48	628.45	0.231689	1389	1343	1473	1818	3401	3320	3219	3708	1921	2750	4895	1558	2280	2254	2320	5293	2683.88
unknown876	0.0419656	0.24924	24	15	1130.66	0.344072	1	20	12	5855.75	0.0756298	0.598523	22	13.475	2542.22	4093.45	1.61019	665	637	380	609	1493	579	387	2252	2016	7628	11557	2222	848	422	1948	5271	2432.12
unknown896	0.0419656	0.24924	18	12	2499.62	0.12544	1	20	12	10064.8	0.0328843	0.445726	19	12.0333	5647.28	4742.22	0.839736	5220	2501	1891	4903	3702	3764	3576	4365	4631	11579	12564	11485	2322	2298	1691	4901	5087.06
unknown654	0.0499351	0.294237	24	15	427.446	0.196181	1	28	17.9999	5465.25	0.0551116	0.550391	26	16.4821	5111.43	18.1037	0.00354182	4694	4728	4491	4853	5554	4837	4728	4862	5434	5471	5475	4801	5326	5320	5319	5896	5111.81

## Sheet: uni cycling proteinAM in protAS
CycID	JTK_pvalue	JTK_BH.Q	JTK_period	JTK_adjphase	JTK_amplitude	LS_pvalue	LS_BH.Q	LS_period	LS_adjphase	LS_amplitude	meta2d_pvalue	meta2d_BH.Q	meta2d_period	meta2d_phase	meta2d_Base	meta2d_AMP	meta2d_rAMP	0	0.1	0.2	0.3	6	6.1	6.2	6.3	12	12.1	12.2	12.3	18	18.1	18.2	18.3	ProteinS
CAR 18:2	0.0579045	0.298155	24	18	1380.98	0.257746	1	28	17.9999	5142.99	0.077679	0.658073	26	18.1071	3215.41	615.542	0.191435	2400	669	3745	1117	1531	1991	4123	2237	4604	2573	2115	3246	4119	5100	4628	6725	3182.69
Cer 33:0;2O|Cer 14:0;2O/19:0	0.0579045	0.298155	18	6	363.63	0.99995	1	20	6	1005	0.222864	0.898285	19	6.01667	758.926	319.158	0.420539	517	288	486	158	827	979	1186	1028	369	477	415	370	1252	648	1300	1224	720.25
PC P-42:5 or PC O-42:6 Isomer A	0.0579045	0.298155	24	18	387.141	0.0803582	1	20	12	1251	0.0296413	0.515656	22	14.85	875.841	655.518	0.748444	1105	744	1007	415	518	260	424	499	1318	1530	982	1174	1181	769	1360	825	881.938
PE 36:1|PE 18:0_18:1	0.0579045	0.298155	18	6	78061.1	0.997956	1	20	6	206271	0.222535	0.898285	19	6.01667	149931	69034.7	0.460443	110185	67841	77971	46977	181278	203139	239038	201629	81804	101950	82611	73925	224843	102955	281160	187743	141566
PI 36:1	0.0579045	0.298155	18	6	86742.9	0.997756	1	20	5.99999	232981	0.222502	0.898285	19	6.01666	165600	82255.9	0.496714	126276	69725	80267	38341	192515	215424	281816	242169	97498	111033	91147	69959	235833	105496	329183	203436	155632
TG 58:5	0.0579045	0.298155	24	18	8120.41	0.303938	1	23.9024	17.9999	27776.2	0.0886991	0.671246	23.9512	18	20413.6	5520.87	0.27045	30608	11789	21230	7010	12346	13870	13568	12140	27204	25528	18224	22138	34299	16189	30685	29932	20422.5
TG 59:2	0.0579045	0.298155	24	18	3988.79	0.320136	1	28	17.9999	17582	0.0924637	0.679377	26	18.1071	11621.2	3877.47	0.333654	15845	6504	9326	4226	7781	9799	5102	8861	15118	10585	8223	10944	25239	9608	17977	17504	11415.1
TG 60:5	0.0579045	0.298155	24	18	1347.57	0.421831	1	23.6461	17.9999	5576.75	0.115098	0.744938	23.8231	18.001	4398.69	879.047	0.199843	6148	3045	4754	1879	2624	3480	3389	3231	5822	5095	3773	4915	6630	3578	6037	6062	4403.88
unknown1123	0.0579045	0.298155	24	18	4081.07	0.309744	1	22.3291	17.9999	12281	0.090054	0.671246	23.1646	18.0234	9247.7	2201.44	0.238053	13614	5534	10283	2857	4914	6778	5625	5270	12887	12561	8610	10959	14920	6814	14852	12538	9313.5
unknown1131	0.0579045	0.298155	18	15	17593.9	0.768957	1	20	12	40795.8	0.183077	0.850948	19	13.6167	34610.4	17681.9	0.510885	67418	34995	60736	26335	18947	21445	15106	11835	32309	49405	39121	42348	35063	19505	37098	39360	34439.1
unknown1157	0.0579045	0.298155	18	6	23255.3	0.998145	1	20	6	50872.2	0.222566	0.898285	19	6.01667	35181.3	19393.5	0.551244	22314	9909	16701	5778	42698	49688	57758	53345	16903	16219	14614	14253	58582	26401	62755	57381	32831.2
unknown1179	0.0579045	0.298155	18	6	61754.8	0.995878	1	20	6	136696	0.222192	0.898285	19	6.01667	93243.7	53193.7	0.570481	56957	26851	43253	16221	117148	130962	158246	140428	44387	44002	37734	37282	151789	70826	165547	147130	86797.7
unknown1335	0.0579045	0.298155	18	15	8375.33	0.831142	1	20	12	15441	0.19414	0.873434	19	13.6167	12977.2	7663.2	0.590512	25786	12705	27719	9441	5529	6330	5312	3640	11424	19926	13163	17251	11802	6256	15943	14221	12903
unknown1370	0.0579045	0.298155	24	21	1141.27	0.374899	1	20	17.9999	5274	0.104853	0.704773	22	19.525	4264.15	1114.55	0.261376	8154	4263	5100	2585	2037	2101	3785	2229	5479	4086	4301	4657	6092	4104	5801	5099	4367.06
unknown1406	0.0579045	0.298155	18	0	1531.95	0.835205	1	25.2722	17.9999	5384	0.194853	0.87489	21.6361	18.5231	4992.82	1861.83	0.372901	8913	6013	11176	3492	3135	4131	2981	2593	3794	5524	4134	5510	8129	2375	5713	5319	5183.25
unknown1442	0.0579045	0.298155	24	18	9064.05	0.295338	1	23.1496	17.9999	38901.7	0.0866802	0.671246	23.5748	18.0058	30807.1	6277.8	0.203778	40104	20728	36049	16223	20191	24343	23185	20798	39336	35712	28940	33160	46514	26093	40609	42391	30898.5
unknown1446	0.0579045	0.298155	24	18	1765.12	0.26275	1	28	17.9999	10894.2	0.0788945	0.663364	26	18.1071	6461.08	2733.89	0.423132	10126	2068	5058	2582	3714	4515	4585	4653	6385	4971	3520	5298	13163	6000	12126	12288	6315.75
unknown1512	0.0579045	0.298155	18	6	3001.67	0.995859	1	20	6	6607	0.222189	0.898285	19	6.01667	4319.8	2812.34	0.651035	1729	945	1348	905	5315	5611	8019	7483	1384	1606	1354	1352	7665	4192	7523	7233	3979
unknown1547	0.0579045	0.298155	24	18	4718.17	0.393375	1	21.6708	17.9999	15628.7	0.108924	0.717111	22.8354	18.0469	11593.2	3593.57	0.309973	19268	6838	14392	4596	6297	8218	6475	5406	15901	14718	11225	12122	20259	8138	17666	16452	11748.2
unknown1600	0.0579045	0.298155	24	18	4472.98	0.331208	1	22.1053	17.9999	19368.7	0.0950094	0.682303	23.0526	18.0304	16080.1	2496.58	0.15526	19771	11657	19288	9234	11160	13372	12999	10721	20791	18030	16195	17958	23167	13273	19888	21147	16165.7
unknown188	0.0579045	0.298155	24	18	27406.8	0.323928	1	24.9858	17.9999	89321.9	0.0933381	0.680338	24.4929	18.0073	62931.2	20153.2	0.320242	98157	32870	61945	19081	33240	42255	42092	36408	82354	79251	53637	63387	109114	46772	104385	97017	62622.8
unknown271	0.0579045	0.298155	24	18	7814.24	0.29881	1	22.7907	17.9999	24028.2	0.087497	0.671246	23.3953	18.012	17875.9	4715.2	0.263774	25835	10635	20267	6908	10176	11781	10912	11292	23637	24909	16631	18511	28494	13294	29071	25254	17975.4
unknown326	0.0579045	0.298155	24	18	21682.7	0.298836	1	21.6708	17.9999	61583	0.087503	0.671246	22.8354	18.0469	45642.9	12595.7	0.275961	72876	28387	50422	14259	23530	27287	24798	26201	66548	65828	43320	49191	72830	33612	75980	63910	46186.2
unknown37	0.0579045	0.298155	18	6	674.933	0.999936	1	28	6	3997.75	0.222862	0.898285	23	6.29762	2550.92	752.471	0.29498	794	466	263	424	1054	3800	6089	5048	747	877	436	233	5070	2556	7440	5103	2525
unknown722	0.0579045	0.298155	18	6	4012.48	0.999372	1	20	6	8268	0.222769	0.898285	19	6.01667	5280.02	3754.41	0.71106	1194	930	711	716	6312	7649	10404	8707	979	1092	1340	666	9850	4223	12591	9837	4825.06
unknown73	0.0579045	0.298155	18	15	5106.9	0.64293	1	20	12	12670	0.159736	0.822493	19	13.6167	8761.86	5413.4	0.617837	20523	7516	2715	6124	3647	4954	4406	4337	11514	13761	13580	11825	7461	6154	11867	8967	8709.44
unknown750	0.0579045	0.298155	24	18	5777.42	0.2871	1	24.9858	17.9999	18455.7	0.0847326	0.671246	24.4929	18.0073	12754.9	4369	0.342536	20071	6390	12050	4013	6645	9066	7243	6935	17237	16388	10419	12728	24041	10083	20127	19572	12688
unknown855	0.0579045	0.298155	24	18	4069.75	0.320731	1	24.8451	17.9999	13062	0.0926011	0.679377	24.4225	18.0054	9256.44	2855.98	0.30854	14361	4661	9093	3059	5287	5931	6210	5501	11962	11690	8021	9475	16325	6921	14925	14077	9218.69
unknown876	0.0579045	0.298155	24	18	711.349	0.493484	1	25.2722	17.9999	3261.49	0.130165	0.756183	24.6361	18.012	2117.74	1062.93	0.501917	1113	632	3662	2520	447	506	2846	668	2582	1346	1302	2883	2009	3623	3073	4341	2097.06
unknown891	0.0579045	0.298155	18	6	1002.68	0.999991	1	28	6	2941.75	0.222871	0.898285	23	6.29762	2185.39	303.277	0.138775	2342	663	1029	457	1683	2752	4838	2494	798	625	1302	1177	4382	1793	2449	6015	2174.94
unknown905	0.0579045	0.298155	24	18	7093.34	0.392124	1	23.52	17.9999	21428.5	0.10865	0.717111	23.76	18.0018	15761.3	4510.79	0.286195	24374	9373	17363	5306	9098	10195	10141	10049	20506	21280	13891	15472	24530	11831	27455	21898	15797.6
unknown950	0.0579045	0.298155	18	6	2388.96	0.999991	1	20	6	6213.25	0.222871	0.898285	19	6.01666	4322.89	2466.51	0.570571	2210	1224	1063	404	4370	5123	7559	7801	2172	2122	1270	967	8490	2435	10445	6729	4024
unknown990	0.0579045	0.298155	18	15	3983.31	0.740073	1	20	12	10552.5	0.177841	0.84508	19	13.6167	9687.79	3779.94	0.390176	15655	10882	15848	10715	6635	7059	5168	4119	8118	12346	10291	11455	9642	5861	9432	11193	9651.19
Cer 35:1;2O|Cer 14:1;2O/21:0	0.0787266	0.33601	18	6	1148.69	0.996598	1	20	5.99999	4367	0.278151	0.972659	19	6.01666	3476.36	1085.52	0.312259	3029	1866	2607	1841	4013	4146	4986	4323	2272	2472	2799	2557	5086	2568	4631	4321	3344.81
LPE 20:0	0.0787266	0.33601	18	6	7537.94	0.998125	1	20	6	15352.8	0.278457	0.972659	19	6.01667	10098.4	6452.05	0.638917	5241	2025	3600	1393	12850	16031	18085	14445	3788	4945	3177	2625	19825	5365	19415	16255	9316.56
PE-Cer 34:0;2O|PE-Cer 14:0;2O/20:0	0.0787266	0.33601	18	6	4177.23	0.99996	1	28	6	10014.8	0.278824	0.972659	23	6.29762	7129.97	1711.72	0.240073	4777	2593	4211	1409	9092	9351	11230	10386	3840	4223	3404	3279	12517	6220	13672	12932	7071
TG 58:2	0.0787266	0.33601	24	18	14968.7	0.397579	1	28	17.9999	63018.6	0.139728	0.759536	26	18.1071	41815.9	14303.3	0.342053	65073	18000	33623	13864	30196	32476	17123	32564	52855	40202	29004	39835	88426	34367	65019	64263	41055.6
TG 60:2	0.0787266	0.33601	24	18	28758.7	0.287775	1	28	17.9999	109550	0.10846	0.717111	26	18.1071	70511.3	23861.9	0.338413	101410	30050	55326	22851	50236	63933	23719	51297	91808	65089	48274	65691	145824	63682	117274	111422	69242.9
TG 62:2	0.0787266	0.33601	24	18	10538	0.313202	1	27.6489	17.9999	41567.4	0.115956	0.744938	25.8245	18.0903	27140.5	9958.67	0.36693	42104	12772	18637	10971	19778	21642	9917	18553	35447	23879	17734	28681	59132	26018	41792	39328	26649.1
unknown1113	0.0787266	0.33601	18	15	3721.5	0.890244	1	28	12	9960.75	0.256377	0.972659	23	14.5119	9655.21	4982.97	0.516091	15947	11971	19077	9939	5932	7787	5138	4898	7483	10529	10033	11798	9927	4656	9200	9927	9640.12
unknown1385	0.0787266	0.33601	18	15	17299.9	0.852751	1	20	12	43661.2	0.248468	0.960905	19	13.6167	39625.9	16657.8	0.420376	67474	41514	72422	39129	24542	27819	20419	17076	31238	52507	40808	50092	40035	21525	40380	44454	39464.6
unknown1431	0.0787266	0.33601	18	0	4292.49	0.600099	1	20	17.9999	23675.7	0.191452	0.871424	19	18.05	19826	5002.1	0.2523	31072	17533	35608	16351	12060	17560	11907	9543	15572	26947	19838	25912	25939	13425	27409	27930	20912.9
unknown1434	0.0787266	0.33601	18	15	10411.1	0.906215	1	20	12	26795.8	0.259707	0.972659	19	13.6167	20051.4	10665.5	0.531907	51526	14463	3202	19085	8648	12549	9896	9874	20799	31476	27278	27630	16990	14059	30110	21585	19948.1
unknown1471	0.0787266	0.33601	18	6	1728.52	0.999849	1	20	6	6277	0.278802	0.972659	19	6.01666	4827.78	1844.1	0.381978	3794	2616	1674	2664	7029	7181	6308	4590	3036	4144	2868	2763	8360	4113	6787	5742	4604.31
unknown1485	0.0787266	0.33601	18	15	3277.44	0.588607	1	20	12	13169.5	0.188682	0.865556	19	13.6167	9037.78	4269.48	0.472404	12715	9757	8475	1050	6532	6869	5678	7085	7580	16261	14593	14244	10687	3605	11356	7456	8996.44
unknown1530	0.0787266	0.33601	24	18	22184.8	0.317031	1	21.0501	17.9999	75986.7	0.11707	0.746653	22.5251	18.0775	61137.8	11923.8	0.195032	94058	33775	69020	32716	41332	46612	40978	31159	77054	85254	62504	70554	88042	51952	86518	77435	61810.2
unknown1562	0.0787266	0.33601	18	6	707.991	0.999948	1	20	6	1593.75	0.278821	0.972659	19	6.01667	1063.58	677.817	0.6373	537	194	172	66	1171	1440	1986	1778	338	365	313	185	2113	556	2822	1667	981.438
unknown159	0.0787266	0.33601	18	6	10743.1	0.99894	1	28	6	27253	0.27862	0.972659	23	6.29762	18586.1	4002.17	0.215331	7659	943	3572	489	16381	20877	35509	36245	5924	7146	3290	2628	48414	7805	62766	35523	18448.2
unknown1602	0.0787266	0.33601	18	15	8042.63	0.295276	1	20	12	24226.2	0.110689	0.726599	19	13.6167	18928.4	7588.48	0.400904	27300	14438	24831	10104	12437	13023	11865	9885	24104	29053	21543	22205	20884	14522	25793	19692	18854.9
unknown193	0.0787266	0.33601	18	6	2673.57	0.999794	1	20	6	6413	0.278791	0.972659	19	6.01667	4163.64	2860.01	0.686901	1463	404	571	424	4195	5279	8237	7941	1076	929	724	504	7720	3208	10126	8272	3817.06
unknown270	0.0787266	0.33601	18	6	3559.22	0.992003	1	28	6	10919	0.277229	0.972659	23	6.29762	8755.98	862.789	0.0985371	7158	3984	5174	1968	8392	10002	12289	12993	6388	5124	4103	4069	15247	8140	18721	15868	8726.25
unknown289	0.0787266	0.33601	18	6	2004.65	0.99998	1	28	6	5510.25	0.278828	0.972659	23	6.29762	3554.99	1093.66	0.30764	1534	865	621	242	3268	5107	6597	7069	1288	1419	898	606	8931	1445	10067	6320	3517.31
unknown578	0.0787266	0.33601	18	6	444.417	0.938047	1	28	6	1259.25	0.26628	0.972659	23	6.29762	1041.36	27.7039	0.0266037	657	183	412	0	856	819	1644	1718	485	313	362	146	2773	551	3097	2661	1042.31
unknown699	0.0787266	0.33601	24	18	4459.19	0.332449	1	21.1511	17.9999	14120.7	0.12152	0.755715	22.5755	18.0719	10863.1	2723.95	0.250753	17601	7343	12352	3763	5667	6995	6218	6658	15741	15339	10012	11999	16564	8923	17178	13818	11010.7
unknown719	0.0787266	0.33601	18	6	1745.14	0.999156	1	28	6	4069.5	0.278663	0.972659	23	6.29762	2893.77	604.701	0.208966	1515	1094	1235	567	3276	3967	4268	4767	1247	1784	1080	836	5810	2773	6047	5701	2872.94
unknown744	0.0787266	0.33601	18	6	6754.81	0.99997	1	28	5.99999	18625.2	0.278826	0.972659	23	6.29761	13080.1	3702.31	0.283049	8614	5172	6565	1676	14075	17133	20373	22920	8488	6401	6531	7599	25817	10031	23052	22794	12952.6
unknown846	0.0787266	0.33601	24	18	4123.85	0.336852	1	23.9024	17.9999	13001.2	0.122781	0.756183	23.9512	18	9370.34	2710.27	0.28924	14625	4872	9459	3020	5069	6882	5804	5068	12997	12424	7938	9832	16597	7256	14487	13665	9374.69
unknown89	0.0787266	0.33601	18	6	4404.21	0.999942	1	28	6	11196	0.27882	0.972659	23	6.29762	7330.41	2092.62	0.285471	3407	1491	1715	453	7703	8884	13503	14694	2639	2808	1585	1753	17600	4136	20772	12990	7258.31
unknown958	0.0787266	0.33601	24	18	6388.53	0.362486	1	22.6735	17.9999	22363.7	0.130032	0.756183	23.3368	18.0145	17461.2	3792.94	0.217221	25799	11471	19224	7207	10256	12574	12942	11787	22773	21906	16450	18949	26273	14200	24580	24402	17549.6
CAR 16:1	0.105571	0.376798	24	18	6980.2	0.574107	1	28	17.9999	24198.2	0.230515	0.912397	26	18.1071	15738.1	4167.19	0.264784	9128	2613	22621	9734	7906	7701	22028	7283	23293	11725	8468	18972	17805	26198	17351	35439	15516.6
Cer 32:1;2O|Cer 14:1;2O/18:0	0.105571	0.376798	18	6	849.589	0.999973	1	20	5.99999	2235.25	0.342927	1	19	6.01666	1670.21	737.238	0.441403	1032	550	977	440	1946	2075	2516	2404	867	1040	822	870	2739	1272	2912	2832	1580.88
Cer 32:2;3O|Cer 14:2;2O/18:0;(2OH)	0.105571	0.376798	18	6	459.619	0.995965	1	28	6	1821.75	0.341974	1	23	6.29762	1550.22	184.284	0.118876	1304	708	1358	649	1475	1589	2143	2080	1139	1309	1112	1301	2213	1357	2819	2146	1543.88
Cer 34:0;2O|Cer 14:0;2O/20:0	0.105571	0.376798	18	6	6679.33	0.999852	1	28	5.99999	16574	0.342898	1	23	6.29762	11486.7	3079.88	0.268126	5944	3155	5504	3013	12905	14879	18920	19592	5362	6991	4838	4657	22271	12532	20144	21382	11380.6
Cer 36:0;2O|Cer 14:0;2O/22:0	0.105571	0.376798	18	6	4573.39	0.979995	1	28	5.99999	14682.5	0.338163	1	23	6.29762	11562.4	1105.02	0.0955698	7044	3235	5162	1892	9765	11586	17351	20028	6690	6534	4145	4108	25125	8609	28530	24586	11524.4
Cer 36:2;2O|Cer 14:1;2O/22:1	0.105571	0.376798	18	6	7603.17	0.99948	1	28	5.99999	21439	0.34281	1	23	6.29762	15369.8	3324.39	0.216294	9499	4384	6792	1962	14728	18352	24901	27775	8947	7191	5860	6305	31968	10644	34897	29879	15255.2
PE-Cer 34:1;2O|PE-Cer 14:1;2O/20:0	0.105571	0.376798	18	6	27351.6	0.99999	1	20	6	78017.2	0.342931	1	19	6.01667	59776.6	23483	0.392846	52333	23352	34166	14358	60545	74826	93391	83307	34416	40905	31605	29717	95050	37012	124582	81330	56930.9
PI 38:1|PI 20:0_18:1	0.105571	0.376798	18	6	2324.61	0.999512	1	20	5.99999	7461.75	0.342817	1	19	6.01666	5357.05	2592.64	0.483968	4010	2335	2513	1339	5628	6210	9932	8077	3445	3399	2775	2408	8405	3127	10944	6139	5042.88
TG 60:1	0.105571	0.376798	24	18	20565.8	0.333215	1	27.6489	17.9999	79152.1	0.152929	0.800295	25.8245	18.0903	51196.8	19330.7	0.377577	81096	24109	35725	17267	35221	40885	17326	36304	67963	45817	34999	50565	113458	46945	78656	77550	50242.9
TG 62:1	0.105571	0.376798	24	18	10105.6	0.325204	1	28	17.9999	41843.4	0.150088	0.792858	26	18.1071	26663.8	8891.59	0.333471	38821	12125	19569	8183	19302	23443	10914	19165	33988	22885	17932	25357	56941	22179	45065	43189	26191.1
unknown105	0.105571	0.376798	18	6	10985.6	0.999143	1	28	6	26018.8	0.34273	1	23	6.29762	17804.8	4047.33	0.227317	7904	3561	5412	2014	18390	22673	30362	32650	6627	7113	5326	3694	42034	12581	44988	37317	17665.4
unknown1132	0.105571	0.376798	18	6	715.239	0.998327	1	28	6	3111.25	0.342536	1	23	6.29762	2614.47	347.505	0.132916	2097	1240	2408	1126	2254	2806	3817	3568	1892	2167	1998	2162	3753	2433	4253	3666	2602.5
unknown1146	0.105571	0.376798	18	6	1977.95	0.992287	1	20	5.99999	6257.25	0.341099	1	19	6.01666	4808.22	1751.3	0.364231	4336	2551	3277	1928	5496	6328	6885	6320	3438	3991	3349	2731	6868	3395	7126	5517	4596
unknown119	0.105571	0.376798	18	6	5762.92	0.997271	1	28	6	17046.5	0.342285	1	23	6.29762	12799.3	1949.35	0.152301	8647	3856	5995	2376	12399	13658	20503	21626	7539	6790	4993	4622	25444	10091	30640	24536	12732.2
unknown1208	0.105571	0.376798	18	15	9639.99	0.754376	1	20	12	34516	0.281148	0.973258	19	13.6167	30869	9806.65	0.317686	42765	30204	46637	30178	21726	27419	18389	16335	26223	37437	34382	40022	29403	20576	34714	35975	30774.1
unknown1209	0.105571	0.376798	18	15	1439.85	0.560205	1	20	12	4151.75	0.226382	0.905932	19	13.6167	3251.85	1487.82	0.457532	5938	3268	3870	1043	1669	1234	2187	2017	4071	4949	3864	3723	3508	2152	4935	3371	3237.44
unknown1244	0.105571	0.376798	18	6	846.76	0.998014	1	28	6	2302.5	0.342461	1	23	6.29762	1700.25	272.127	0.160051	1086	625	786	208	1503	1984	3116	2607	787	1151	672	357	3347	1499	3823	3503	1690.88
unknown1254	0.105571	0.376798	18	6	3083.52	0.993487	1	28	6	8207	0.341385	1	23	6.29762	6594.31	660.168	0.100112	5606	1934	4563	1251	6478	8202	9018	9130	3779	4635	3372	3117	12894	4706	13638	12822	6571.56
unknown1342	0.105571	0.376798	18	0	4696.25	0.836784	1	20	17.9999	21127.2	0.302702	1	19	18.05	19253.7	5035.62	0.261541	32380	18648	38176	17325	12583	17092	12136	10171	14336	25624	18618	23967	24361	11371	24160	24617	20347.8
unknown1359	0.105571	0.376798	18	6	5810.65	0.998154	1	20	6	13252	0.342495	1	19	6.01666	8943.03	5333.72	0.596411	4965	2629	3073	1634	10507	12452	15694	14355	3979	3984	3813	4023	14582	5776	16916	14365	8296.69
unknown1449	0.105571	0.376798	24	18	7869.21	0.277969	1	22.3291	17.9999	27724.5	0.132894	0.756183	23.1646	18.0234	21582.9	4614.63	0.21381	31085	11642	24199	11098	14948	16996	14447	11102	25871	28961	22093	24193	33326	18356	30578	28638	21720.8
unknown1491	0.105571	0.376798	18	6	740.341	0.990124	1	28	5.99999	2160.75	0.340584	1	23	6.29761	1693.76	210.771	0.12444	1217	539	899	201	1616	2052	2992	1983	1026	917	735	885	3506	1262	3338	3816	1686.5
unknown1566	0.105571	0.376798	18	6	872.923	0.99978	1	20	6	2953.75	0.342881	1	19	6.01667	2241.09	912.091	0.406986	1369	928	2132	365	1869	2593	4166	3187	1877	2004	1387	1213	3121	2092	2532	3254	2130.56
unknown1601	0.105571	0.376798	24	18	10814.8	0.293305	1	20.5594	17.9999	44936.7	0.138563	0.759536	22.2797	18.1079	38063.5	5885.11	0.154613	51416	27808	45196	23700	27784	31257	28580	22640	45462	50172	39361	42240	49383	32043	50295	48026	38460.2
unknown1624	0.105571	0.376798	24	18	20972.4	0.995839	1	20	17.9999	67825.5	0.341945	1	22	18.15	55277.9	13178.6	0.238407	44457	10057	9724	167648	32683	38842	39798	27251	64955	59892	61697	73112	65870	63834	80735	60863	56338.6
unknown226	0.105571	0.376798	18	6	2634.33	0.999016	1	28	6	11530	0.342699	1	23	6.29762	9449.89	1705.66	0.180495	8433	6473	6687	4143	10761	11631	11826	11902	8058	8387	7967	6973	12510	9260	13515	11732	9391.12
unknown32	0.105571	0.376798	18	6	1016.82	0.999969	1	28	6.00002	2990.75	0.342926	1	23	6.29763	2157.91	614.096	0.284579	1546	1126	1011	402	2232	2830	3344	3557	1864	1390	1390	956	3525	1550	4027	3438	2136.75
unknown339	0.105571	0.376798	24	18	9667.56	0.327829	1	22.3291	17.9999	29005.2	0.151022	0.795877	23.1646	18.0234	21995.4	5131.78	0.233312	32228	13085	23815	8317	12354	15031	13291	14094	31498	31104	19805	23737	34554	16304	36054	29109	22148.8
unknown571	0.105571	0.376798	24	18	6778.68	0.173292	1	20.5594	12	22483.8	0.0914938	0.67567	22.2797	14.8569	16845.5	8143.6	0.483429	21918	11343	15598	7975	11079	12573	10832	11035	26330	25698	16947	20960	23585	12275	22068	20157	16898.3
unknown617	0.105571	0.376798	18	6	1064.02	0.984356	1	28	5.99999	3968.75	0.339207	1	23	6.29761	3305.7	312.458	0.0945208	2401	1672	2175	1384	3024	3892	4543	4416	2347	2306	2056	2051	5368	2967	6338	5779	3294.94
unknown660	0.105571	0.376798	18	6	1206.5	0.984545	1	28	6	3443.25	0.339252	1	23	6.29762	2757.75	241.196	0.0874612	1850	1192	1433	809	2986	2838	3743	4206	2003	1530	1205	1031	5262	2326	6141	5436	2749.44
unknown700	0.105571	0.376798	18	6	8740.02	0.998774	1	28	6	24078.5	0.342642	1	23	6.29762	16355.5	3225.97	0.19724	5794	2135	2254	535	16385	14374	33079	32476	4835	4057	2563	1984	46830	6205	52650	33754	16244.4
unknown812	0.105571	0.376798	24	18	1760.17	0.246115	1	28	17.9999	11908.2	0.120827	0.754271	26	18.1071	7598.59	2233.37	0.293918	10083	3319	5893	3923	4989	6322	5706	6121	7412	7060	4908	6309	14904	7164	12816	12749	7479.88
unknown818	0.105571	0.376798	18	6	930.553	0.999642	1	28	6	3489.5	0.342848	1	23	6.29762	2758.41	327.478	0.11872	2588	1344	1524	667	2742	2625	3501	5090	2000	1460	1288	1628	5810	1962	5490	4235	2747.12
unknown833	0.105571	0.376798	18	15	9010.66	0.242778	1	20	12	23025.2	0.119539	0.751452	19	13.6167	18102.8	8176.73	0.451684	28466	14657	26203	7571	9193	7351	14817	6494	25879	23684	21069	21469	21491	18361	21352	20320	18023.6
unknown86	0.105571	0.376798	18	6	13712.9	0.995347	1	28	6	38713.5	0.341827	1	23	6.29762	29109.5	4140.8	0.142249	17825	8873	13327	4302	28968	32680	43968	49238	15691	14152	11409	10277	62597	21053	72431	56678	28966.8
unknown865	0.105571	0.376798	18	6	1270.49	0.933992	1	28	5.99999	3188.5	0.32703	1	23	6.29762	2679.9	45.984	0.0171589	2032	638	1194	473	2338	3112	3478	3826	2023	1146	1121	779	5257	2025	6348	7063	2678.31
unknown985	0.105571	0.376798	18	6	1924.74	0.996278	1	20	5.99998	6745	0.342049	1	19	6.01666	5329.98	1755.01	0.329272	4288	3271	3735	2415	6623	7149	7041	6167	3476	4515	3992	3687	7108	4252	7463	6695	5117.31
Cer 34:1;3O|Cer 15:1;2O/19:0;O	0.139706	0.426722	18	6	4813.98	0.999955	1	20	6	11689.2	0.414666	1	19	6.01667	8096.58	4687.41	0.578937	3040	2076	2560	984	8215	10156	13292	15094	2741	3065	2831	2166	16668	6793	15751	15025	7528.56
Cer 36:1;2O|Cer 14:1;2O/22:0	0.139706	0.426722	18	6	5596.4	0.998381	1	20	5.99999	14729.8	0.414233	1	19	6.01666	10551.5	5200.64	0.492881	7530	4185	5194	2368	13018	13852	17551	14498	6098	6558	5963	5675	15844	6974	17821	15612	9921.31
Cer d32:1	0.139706	0.426722	18	6	5739.06	0.999982	1	20	5.99999	14164.2	0.414673	1	19	6.01666	10325.4	5022.45	0.486418	5879	2842	4921	2477	10771	13914	16406	15566	4923	5705	4732	5148	17290	7426	20099	17369	9716.75
Cer d34:1	0.139706	0.426722	18	6	14511.2	0.999982	1	28	5.99999	40377.5	0.414673	1	23	6.29762	28342	7823.18	0.276028	18748	11515	13279	5684	31596	36547	43747	49620	18404	15014	13609	14569	54415	22630	49317	50465	28072.4
PE 36:1	0.139706	0.426722	18	6	161960	0.999464	1	28	5.99999	491420	0.41453	1	23	6.29762	359678	72908.5	0.202705	233186	125077	150119	60227	360542	426789	583196	595152	204161	219741	149488	142586	751483	228480	883309	601124	357166
PE-Cer 35:1;2O|PE-Cer 17:0;2O/18:1	0.139706	0.426722	18	6	282.136	0.999968	1	20	5.99999	1140.5	0.414669	1	19	6.01666	931.709	266.83	0.286388	807	485	744	421	971	1066	1323	1202	598	760	707	600	1308	695	1453	1250	899.375
unknown1105	0.139706	0.426722	24	18	292.742	0.358804	1	28	17.9999	1357.5	0.200167	0.882854	26	18.1071	1016.34	58.0658	0.0571324	475	713	753	972	828	466	1185	1041	1608	824	799	1118	1214	1398	1627	1191	1013.25
unknown1234	0.139706	0.426722	18	0	7672.64	0.679959	1	20	12	34685.5	0.318605	1	19	15.2	30687.2	12027.3	0.391931	46837	28651	52657	28168	21053	27181	17421	15301	25098	38972	33555	41117	34468	20274	37495	42252	31906.2
unknown1328	0.139706	0.426722	18	6	3632.05	0.999993	1	28	5.99999	11466.5	0.414676	1	23	6.29762	8523.19	1819.66	0.213496	6469	3925	5641	2167	9265	10441	13434	12726	5397	6090	4759	4368	13543	5840	17850	13453	8460.5
unknown1411	0.139706	0.426722	18	0	7605.82	0.854571	1	20	12	25215.5	0.373134	1	19	15.2	23011.2	10119.5	0.439765	37026	24505	45324	23817	15829	19799	13268	11316	17927	29624	23361	29950	25375	14385	24930	28154	24036.9
unknown1443	0.139706	0.426722	18	0	3479.32	0.563221	1	20	12	14242.5	0.278727	0.972659	19	15.2	12598.6	5759.82	0.45718	17387	11994	24249	13791	7645	10528	6751	5688	10237	15780	12417	18536	15035	9716	13767	17397	13182.4
unknown1542	0.139706	0.426722	24	18	5108.32	0.353632	1	20.464	17.9999	15035.2	0.197999	0.879881	22.232	18.1145	11904	2856.51	0.239962	17965	8467	15739	4868	6558	8600	7229	5962	16285	16572	11458	13801	18662	8367	16226	16886	12102.8
unknown1556	0.139706	0.426722	18	0	6149	0.634516	1	20	17.9999	25721	0.303444	1	19	18.05	20726	6470.46	0.31219	41166	18772	35170	15122	12081	15974	9893	7625	15537	30568	21799	27519	26494	10274	32433	33683	22131.9
unknown1561	0.139706	0.426722	18	0	13885.5	0.743347	1	20	17.9999	62190.5	0.339051	1	19	18.05	47994.4	17395.4	0.362446	112761	38000	89720	21986	24046	32723	18176	16301	38529	78182	46253	62946	66122	21023	79670	81947	51774.1
unknown1577	0.139706	0.426722	24	18	32808	0.332241	1	21.3559	17.9999	126186	0.188919	0.865556	22.678	18.0613	101663	20261.9	0.199306	148127	66272	118817	54332	69012	79220	72399	56595	124968	134928	101255	112065	146461	83586	139823	134875	102671
unknown1603	0.139706	0.426722	18	0	16797	0.632161	1	20	18	73039	0.302646	1	19	18.05	60151.9	17400.2	0.289271	116060	55927	99231	44699	36466	46959	31164	23879	46123	85942	65213	79103	75500	31954	89604	95098	63932.6
unknown662	0.139706	0.426722	18	15	444.063	0.519913	1	20	12	3372.75	0.263107	0.972659	19	13.6167	2814.71	556.867	0.197842	3043	3306	2485	1835	2341	2254	2650	2847	3436	3611	3404	3040	2544	2070	2865	3218	2809.31
unknown725	0.139706	0.426722	18	6	1001.97	0.999277	1	28	5.99999	5064	0.414479	1	23	6.29761	4293.92	427.571	0.0995759	3741	3375	3023	1524	3691	4734	5715	6116	3259	3169	2771	3627	7579	3487	6418	6238	4279.19
unknown764	0.139706	0.426722	18	6	852.771	0.883121	1	28	6.00001	3134.25	0.381546	1	23	6.29762	2775.89	96.7087	0.0348387	2216	1012	1759	1025	2560	3116	2979	3882	2086	2280	1394	1690	5257	2471	5351	5283	2772.56
unknown794	0.139706	0.426722	24	18	29306.6	0.475927	1	22.2166	17.9999	92271.4	0.246725	0.956644	23.1083	18.0268	70332.8	18309.6	0.260328	110323	47672	81491	25095	41907	49008	49386	38305	90905	91526	61489	78534	98434	47297	116606	106749	70920.4
unknown902	0.139706	0.426722	18	6	987.475	0.999837	1	28	5.99999	3210.25	0.414633	1	23	6.29762	2477.73	427.589	0.172573	2100	1227	1702	351	2447	2958	3449	3987	1852	1610	1473	1234	4506	1837	4450	4225	2463
CAR 16:0	0.182589	0.474435	24	18	9064.4	0.511442	1	23.0287	17.9999	40306.2	0.3148	1	23.5144	18.0076	33445.1	3995.11	0.119453	46268	17296	33308	19690	22943	21568	29622	29220	40602	45512	30018	38919	35901	30693	52917	41714	33511.9
Cer 34:0;3O|Cer 14:0;2O/20:0;(2OH)	0.182589	0.474435	18	6	425.148	0.987371	1	28	6.00002	2039.75	0.489148	1	23	6.29763	1834.81	88.9022	0.048453	2091	992	1567	610	1782	1948	2145	2284	1616	1451	1297	1422	2905	1728	2495	2975	1831.75
Cer 36:1;3O|Cer 16:1;2O/20:0;O	0.182589	0.474435	18	6	4373.99	0.997242	1	28	5.99999	11803.2	0.492227	1	23	6.29761	8705.11	1675.71	0.192497	5027	2743	3359	1647	8940	10766	13151	14356	4656	4894	4052	3404	17946	6089	19995	17333	8647.38
Cer 38:1;2O|Cer 16:1;2O/22:0	0.182589	0.474435	18	6	434.871	0.999996	1	28	5.99999	1518.25	0.493083	1	23	6.29761	1188.74	222.928	0.187533	1178	634	841	321	1264	1441	1762	1606	896	974	789	741	1817	864	2120	1649	1181.06
unknown1027	0.182589	0.474435	18	3	59.9273	0.332046	1	28	4.54e-05	6571.75	0.230568	0.912397	23	1.91669	7883.37	3778.06	0.479245	10544	3144	7615	4984	5747	6034	6892	7001	6641	6868	5029	6432	15442	7255	13680	13829	7946.06
unknown1111	0.182589	0.474435	24	18	27726	0.406036	1	20.3695	12	114193	0.267031	0.972659	22.1848	14.854	96855.5	36442.9	0.376261	142357	65728	110129	53543	74047	81357	62705	54957	110917	132619	100600	112636	134914	80860	124197	112418	97124
unknown1125	0.182589	0.474435	18	6	6419.65	0.999959	1	20	6.00001	22143.2	0.493072	1	19	6.01667	17587.2	5864.78	0.333469	16273	10349	10376	5918	19139	21154	26135	22145	13930	15765	11969	10944	25486	11329	28987	20125	16876.5
unknown1163	0.182589	0.474435	18	15	23398.9	0.77645	1	20	12	61406.2	0.418727	1	19	13.6167	55777.8	22158.4	0.397262	103996	55967	92966	44884	34445	39082	28578	23167	47634	76073	58112	63806	58835	32296	62451	66720	55563.2
unknown1206	0.182589	0.474435	24	18	83485.6	0.603048	1	21.8859	17.9999	448735	0.353042	1	22.9429	18.0383	359726	99482.4	0.276551	619663	257238	456272	208428	263257	293306	236394	219316	333820	412057	380563	341981	539723	303054	500885	451278	363577
unknown1265	0.182589	0.474435	24	18	13282.1	0.404443	1	20	17.9999	44436.7	0.266274	0.972659	22	18.15	36196	8134.25	0.224728	60099	22514	47115	17890	22358	25937	21745	19216	44720	51697	38470	40103	53150	28588	50465	45544	36850.7
unknown1289	0.182589	0.474435	18	6	12553.8	0.999988	1	28	5.99998	38890.8	0.493081	1	23	6.29761	29779.5	6219.74	0.20886	27618	12969	21856	6505	31796	37778	45145	40844	22585	22610	17342	19266	46720	22221	53477	44311	29565.2
unknown1327	0.182589	0.474435	18	15	11263.9	0.859262	1	20	12	28015.5	0.447486	1	19	13.6167	25721.6	10096.3	0.392524	47975	26237	45615	19726	15252	18144	13600	11671	21074	33805	25733	31450	27967	13659	28267	29806	25623.8
unknown1331	0.182589	0.474435	18	6	742.462	0.999148	1	28	5.99999	3689.25	0.49282	1	23	6.29761	3069.48	349.597	0.113894	2228	1773	2495	1510	2960	3021	4349	4427	2248	2611	2084	1931	4728	2548	5445	4561	3057.44
unknown1346	0.182589	0.474435	18	6	1359.59	0.999925	1	20	6.00001	6345.75	0.493061	1	19	6.01667	5396.57	1185.79	0.219731	5739	3703	4013	2991	5975	6265	6604	6539	4142	5058	4720	4407	6139	3362	8598	5791	5252.88
unknown1456	0.182589	0.474435	18	0	8655.52	0.783889	1	20	17.9999	59382.4	0.421374	1	19	18.05	45568.6	15148	0.332421	95962	36934	84711	22742	28644	36209	23771	21319	36489	64761	41406	51281	66234	23315	76985	70996	48859.9
unknown1470	0.182589	0.474435	18	0	9372.35	0.778689	1	20	17.9999	69439.2	0.419525	1	19	18.05	57008.3	14968.9	0.262574	104385	50885	94737	40204	41263	47971	37854	30482	45441	75072	54091	64029	73349	31946	89587	82875	60260.7
unknown1483	0.182589	0.474435	18	0	3600.59	0.787845	1	20	17.9999	24553	0.422776	1	19	18.05	19905.1	5516.26	0.277128	38545	17529	33101	13110	14323	16684	12519	10170	15654	26728	19041	22042	26101	11170	31785	29156	21103.6
unknown1535	0.182589	0.474435	18	0	19970.8	0.666144	1	20	17.9999	122874	0.377878	1	19	18.05	100952	25590.9	0.253495	176851	85083	172080	70167	75532	82003	58198	44215	88687	136555	101767	121567	119468	66300	151999	153731	106513
unknown1583	0.182589	0.474435	24	18	4712.87	0.310563	1	20.1831	17.9999	15559.2	0.219443	0.898285	22.0915	18.1353	12598.8	2765.11	0.219473	19397	8741	15966	6340	8057	9175	7475	6740	15868	17081	14016	13857	18789	9782	17854	15812	12809.4
unknown1616	0.182589	0.474435	18	15	687.308	0.581695	1	20	12	2238.25	0.344371	1	19	13.6167	1829.97	699.895	0.382463	2058	1676	3195	969	1181	865	1332	1080	2213	2598	1616	2526	1325	1853	2668	2016	1823.19
unknown162	0.182589	0.474435	18	6	2524.72	0.999726	1	28	5.99999	6450.5	0.492999	1	23	6.29762	4751.44	1017.73	0.214194	2887	1922	2421	1607	5625	6168	7301	6708	3177	2452	2595	2420	8992	3676	9574	7937	4716.38
unknown280	0.182589	0.474435	18	6	4083.9	0.981021	1	28	6	12526	0.487158	1	23	6.29762	10067.6	1132.14	0.112453	6993	4110	5481	2172	9324	11340	14926	14514	7340	5960	4313	5648	19246	8710	21430	18951	10028.6
unknown652	0.182589	0.474435	18	6	2132.63	0.999972	1	20	6.00002	7743.5	0.493076	1	19	6.01668	5828.61	2473.44	0.424362	3629	3064	3483	1315	5668	6648	9383	9275	4371	3737	3798	2862	9469	3821	10118	7821	5528.88
unknown817	0.182589	0.474435	18	3	274.357	0.913849	1	28	5.99999	3202	0.465637	1	23	4.38095	3258.08	482.423	0.14807	2737	1288	640	5159	2786	3051	3867	3104	2551	2652	2272	2674	4770	3305	6110	5054	3251.25
unknown825	0.182589	0.474435	18	15	2483.01	0.905971	1	20	12	7059	0.463055	1	19	13.6167	5476.86	2456.9	0.448596	13967	4288	1346	3205	2488	3473	2967	3104	6362	7742	7348	6784	5358	3959	8643	6215	5453.06
unknown997	0.182589	0.474435	18	15	10963.7	0.294453	1	20	12	34302.2	0.210924	0.898285	19	13.6167	26942	10322.2	0.383128	39240	18110	34466	15780	18574	20921	15351	13967	33846	38493	29501	35369	36195	20681	30257	28721	26842
unknown538	0.209188	0.537948	18	0	351.079	0.999818	1	20	12	2885.5	0.536407	1	19	15.2	2710.26	1032.72	0.381039	3076	2547	721	8352	1751	2006	1920	1861	3876	2838	2379	2449	2547	2789	2986	2941	2814.94
unknown805	0.209188	0.537948	18	6	1165.31	0.997817	1	20	6.00001	2950	0.535752	1	19	6.01667	2144.89	1009.46	0.470637	1273	1204	1062	528	2895	2855	3037	3013	1204	1456	1142	1380	3121	1663	3384	3144	2022.56
PC 38:5 Isomer B	0.235786	0.537948	18	15	583.363	0.973486	1	20	12	5488	0.567341	1	19	13.6167	4960.32	768.33	0.154895	4698	6798	5073	3960	3780	4361	4902	4515	5516	5201	6033	5202	5411	5235	4420	4141	4952.88
unknown1154	0.235786	0.537948	24	18	5312.49	0.554702	1	25.4179	17.9999	27742.5	0.396841	1	24.7089	18.0148	20656.6	5985.65	0.289769	26318	13287	25207	10920	13979	20055	12856	11190	16276	25768	17929	23691	31718	12236	35571	31445	20527.9
unknown1158	0.235786	0.537948	18	6	826.961	0.999995	1	28	6	4814.25	0.576456	1	23	6.29762	4322.97	378.352	0.0875212	5216	3541	3459	2080	4788	4798	4107	5564	3989	3527	4606	3411	4546	5199	4684	5444	4309.94
unknown1332	0.235786	0.537948	18	0	5830.63	0.901603	1	20	12	18112.8	0.541756	1	19	15.2	16895.2	8159.71	0.482959	32474	19106	34162	15595	10747	13395	10175	8313	12743	22651	15961	21096	19567	8769	19651	19152	17722.3
unknown1390	0.235786	0.537948	18	0	5940.05	0.889658	1	20	12	18214	0.537376	1	19	15.2	17450.2	8245.06	0.47249	31382	19876	37177	16704	10771	14286	11081	8698	13463	21383	16017	21993	20803	8547	20281	20113	18285.9
unknown1412	0.235786	0.537948	18	0	2091.62	0.887441	1	20	12	9742	0.536559	1	19	15.2	8401.51	3941.91	0.46919	17839	8110	14300	4328	5262	6590	4100	3959	6918	12917	9311	9822	10694	4437	12207	10023	8801.06
unknown1433	0.235786	0.537948	18	15	478.004	0.999888	1	20	12	2095	0.576419	1	19	13.6167	2125.55	560.607	0.263746	3517	1812	201	6076	1422	1640	1753	897	1927	2197	2466	1790	1652	1641	3129	1802	2120.12
unknown1511	0.235786	0.537948	18	0	20270.6	0.714666	1	20	17.9999	87862.7	0.468583	1	19	18.05	68702	24350.8	0.354442	148073	54111	139779	34517	38804	47435	27668	21894	58611	106094	65629	89820	88150	35516	111647	116138	73992.9
unknown1653	0.235786	0.537948	18	15	8022.13	0.208294	1	20	12	23992.2	0.197121	0.878942	19	13.6167	18679.2	7696.95	0.41206	28843	12897	22610	8985	11571	12254	9869	8754	24831	27894	20776	22468	25445	14849	24147	21482	18604.7
unknown1658	0.235786	0.537948	18	15	11842.4	0.235757	1	20	12	36799	0.216226	0.898285	19	13.6167	29225.6	11286.9	0.3862	44511	21009	35925	14940	19292	19950	15979	13944	37917	42469	32143	34667	39490	23025	37330	33269	29116.2
unknown1669	0.235786	0.537948	24	21	918.532	0.398988	1	28	4.96e-05	652.25	0.316439	1	26	24.375	1364.79	1466.44	1.07448	1713	323	262	311	188	271	275	1766	91	403	284	650	4514	313	3805	4890	1253.69
unknown304	0.235786	0.537948	18	6	1399.54	0.999996	1	20	6	7889.75	0.576456	1	19	6.01667	6915.18	1272.82	0.184062	7340	5511	5484	3247	6966	7780	8240	8573	5957	6598	6122	5475	9694	5363	8210	7615	6760.94
unknown384	0.235786	0.537948	18	6	1794.46	0.994057	1	28	6	7376.5	0.574429	1	23	6.29762	6071.56	965.057	0.158947	4545	3907	4299	1736	6216	6561	7688	9041	6303	4601	4150	3651	9876	5768	9150	9121	6038.31
unknown483	0.235786	0.537948	18	6	1004.09	0.995336	1	28	6	3269.25	0.574866	1	23	6.29762	2584.6	469.162	0.181522	1935	1253	1415	572	2422	3055	4035	3565	2043	2132	1537	1392	4055	2253	5281	4150	2568.44
unknown511	0.235786	0.537948	18	6	1160.72	0.999984	1	28	6	5809	0.576452	1	23	6.29762	5147.81	290.323	0.0563973	6396	3774	3417	2842	4873	5309	5895	7159	4723	4224	4543	2931	6696	4861	8617	5945	5137.81
unknown775	0.235786	0.537948	18	6	3673.24	0.998391	1	28	6	15832.5	0.575909	1	23	6.29762	12483.6	3191.15	0.255628	8310	6943	12111	2798	13158	14345	15220	20607	11621	12099	9838	9519	15877	9587	19745	16200	12373.6
unknown80	0.235786	0.537948	18	6	18355.8	0.998236	1	28	5.99999	56465.2	0.575856	1	23	6.29761	42379	7407.61	0.174794	28183	13702	17541	6822	40497	48927	68260	68177	24746	27111	17651	16341	89734	26142	107930	72217	42123.8
unknown896	0.235786	0.537948	18	15	1140.56	0.906797	1	20	12	3540	0.543649	1	19	13.6167	2976.91	984.321	0.330652	4026	2703	754	5222	1645	1824	2388	1896	4114	3407	4031	2608	2609	2283	5036	2932	2967.38
unknown99	0.235786	0.537948	18	6	2120.97	0.999963	1	28	6	9664.5	0.576445	1	23	6.29762	8215.83	492.113	0.0598981	9646	4293	5993	4393	6929	8688	9582	13459	6818	6540	4780	4615	12524	7018	14958	10946	8198.88
unknown1041	0.268412	0.61114	24	9	461.918	0.544547	1	26.1721	12	5225.5	0.427239	1	25.0861	10.4547	4879.79	505.736	0.103639	3915	5295	5204	5172	4902	5655	5328	4987	5973	4680	5045	5204	3753	4777	4029	4533	4903.25
PI 34:1	0.301037	0.626347	18	6	70666.8	0.999995	1	28	6.00002	254538	0.662437	1	23	6.29763	205388	34903.7	0.16994	231130	105536	127700	67456	217172	228982	314648	257349	156692	196289	154565	117504	299709	137429	403677	251133	204186
TG 42:0	0.301037	0.626347	18	6	135768	0.986837	1	28	6	401638	0.657655	1	23	6.29762	353900	12763	0.0360638	499546	127615	197883	119782	277713	393091	410764	524982	285849	228749	158859	115297	634438	319017	802157	573698	354340
unknown1215	0.301037	0.626347	18	6	4025.91	0.999997	1	28	6.00002	14450.5	0.662438	1	23	6.29763	11233.4	2387.91	0.212573	10371	6203	7830	3637	12627	13801	14953	16421	8917	9339	7091	8217	17731	7103	19302	14875	11151.1
unknown1451	0.301037	0.626347	18	6	1459.82	0.999991	1	28	6.00001	5395	0.662435	1	23	6.29763	4241.71	844.302	0.199047	3968	2435	2838	1308	4449	5275	5713	6143	3355	3616	2645	3065	6583	2781	7676	5552	4212.62
unknown1621	0.301037	0.626347	24	18	4294.44	0.733464	1	20	17.9999	15960.5	0.554318	1	22	18.15	12861.2	5326.4	0.414146	28396	8518	20501	7991	6836	7994	5658	3906	10762	19731	11251	17252	14290	5444	21450	22658	13289.9
unknown63	0.301037	0.626347	18	6	1973.54	0.991911	1	28	6	5836.5	0.659506	1	23	6.29762	5104.13	79.6457	0.0156042	7294	1772	2515	1502	4195	6258	5218	7675	4425	3833	2125	1316	8618	4780	12285	7899	5106.88
unknown776	0.301037	0.626347	18	6	889.54	0.990369	1	28	6	3645.25	0.658944	1	23	6.29762	3026.83	368.83	0.121853	1949	1162	2487	885	2677	3154	3534	5216	1703	2410	2017	2307	5486	2220	5391	5628	3014.12
unknown806	0.301037	0.626347	18	3	165.463	0.846983	1	28	6	4041.5	0.603419	1	23	4.38095	3902.55	665.703	0.170581	3792	2833	3614	2150	3192	3711	4860	4403	3507	3555	3349	3083	5279	4168	5614	5180	3893.12
Cer 32:2;2O|Cer 14:2;2O/18:0	0.380147	0.72386	18	6	1588.16	0.999891	1	28	6	9226	0.747784	1	23	6.29762	7868.44	1134	0.14412	7180	5169	7500	3285	7403	9070	11192	9239	6538	7623	6536	6609	10548	6240	11095	10043	7829.38
Cer 38:1;3O	0.380147	0.72386	18	6	5178.32	0.995603	1	28	5.99998	17818.5	0.746204	1	23	6.29761	15025.5	1271.04	0.084592	15422	5380	11272	2222	12860	17567	21647	19200	11494	11902	7680	9144	27975	9957	32855	23131	14981.8
Cer 38:1;3O|Cer 16:1;2O/22:0;(2OH)	0.380147	0.72386	18	6	4652.41	0.99725	1	28	6.00002	15333.2	0.746812	1	23	6.29763	12737	1375.61	0.108001	13201	4429	9457	1746	11877	14966	18221	16269	10382	9706	6499	8039	22692	8436	26786	20327	12689.6
unknown1037	0.380147	0.72386	24	18	16775	0.458126	1	20.2759	12	72458.2	0.478546	1	22.1379	14.8528	62420.1	22064	0.353476	90773	42169	70880	38937	48405	51431	43166	36693	73376	86452	64332	65673	84861	50570	83368	70400	62592.9
unknown1074	0.380147	0.72386	24	18	28781.9	0.391758	1	20	12	96295.2	0.432526	1	22	14.85	78311.1	37517.7	0.479085	123598	49244	96671	37034	53775	57912	45753	42027	96040	110841	83049	95251	113521	61480	102414	89950	78660
unknown1145	0.380147	0.72386	24	18	69021	0.470705	1	20.1831	12	249670	0.486838	1	22.0915	14.8517	210918	86904.7	0.412031	327101	136585	248688	109864	150376	160438	138239	117754	251329	301185	215439	230726	293619	166515	300887	237496	211640
unknown1190	0.380147	0.72386	24	18	8992.63	0.562057	1	20.3695	12	34625.5	0.543423	1	22.1848	14.854	28985.6	10977.3	0.378718	43794	18462	33849	13562	20012	23953	20562	17794	36713	41531	30044	30214	37444	22295	40951	33883	29066.4
unknown1204	0.380147	0.72386	24	18	8408.91	0.898904	1	23.9024	17.9999	59138.4	0.708642	1	23.9512	18	47846.1	11748.4	0.245545	52414	32868	81782	26962	38812	50196	30175	26309	37302	52757	37952	61756	64555	43049	49060	79890	47864.9
unknown1214	0.380147	0.72386	24	18	14371.9	0.333937	1	20	12	53694	0.38896	1	22	14.85	43852.5	19555.3	0.445934	64201	28728	53278	25920	32194	33573	27920	24605	50854	63158	48167	52597	55539	35016	60195	48605	44034.4
unknown1277	0.380147	0.72386	24	18	3614.02	0.517928	1	20.3695	12	13364.8	0.516856	1	22.1848	14.854	11019.3	4476.67	0.406259	16576	6665	13110	5096	7390	9143	7542	6452	14268	16035	11403	11753	14490	8227	15385	13301	11052.2
unknown1282	0.380147	0.72386	24	18	91502.4	0.622773	1	21.253	17.9999	380021	0.577841	1	22.6265	18.0665	318349	48282.5	0.151665	481078	194333	368863	160586	239282	270443	225317	202523	361284	439811	328179	341958	453666	251840	448761	365816	320859
unknown1457	0.380147	0.72386	18	6	3838.18	0.999888	1	28	6.00002	13619	0.747783	1	23	6.29763	10916.2	1784.36	0.16346	10805	4709	8532	2525	10802	13327	15922	14425	8686	8623	6836	7256	16867	8045	19915	16400	10854.7
unknown506	0.380147	0.72386	18	3	411.713	0.998054	1	28	6	2615.5	0.747108	1	23	4.38095	2451.5	533.77	0.217732	2892	1212	1015	2859	2210	3030	2808	2414	1795	1633	1658	2570	4419	2885	2988	2715	2443.94
unknown654	0.380147	0.72386	18	9	385.196	0.967568	1	28	5.99999	5428.25	0.735698	1	23	8.21428	5069.27	295.733	0.0583383	5074	4699	4758	3194	5780	5335	4984	5614	5003	5374	4965	4912	5682	4630	5308	5581	5055.81
unknown724	0.380147	0.72386	18	15	535.28	0.77544	1	20	17.9999	4310.5	0.654863	1	19	16.4666	3943.72	498.32	0.126358	3853	4725	5147	3181	3469	3660	3529	2822	4300	4017	4021	4504	3942	5618	3584	4098	4029.38
unknown961	0.380147	0.72386	18	6	853.301	0.997729	1	28	6	3140.5	0.746989	1	23	6.29762	2582.41	445.482	0.172506	2438	1380	1562	783	2882	2500	3466	3714	1698	2465	2263	1788	4277	1878	4369	3610	2567.06
unknown970	0.380147	0.72386	24	18	7123.39	0.448192	1	20.0911	12	28467	0.471904	1	22.0456	14.8508	23890.8	9369.29	0.392172	35456	15831	26684	14388	18004	19130	16205	13326	29732	34503	24487	25146	33262	18503	32240	26674	23973.2
Cer 38:0;2O	0.475047	0.82037	18	6	1339.61	0.970408	1	28	6.00001	5684	0.817971	1	23	6.29762	4995.76	252.571	0.050557	4018	2043	4059	1312	3949	4887	7221	6679	3496	4286	3074	3040	9300	3640	10845	7944	4987.06
PEtOH 34:0|PEtOH 16:0_18:0	0.475047	0.82037	24	15	27887.9	0.428476	1	20	12	133037	0.527564	1	22	13.475	113603	23764.8	0.209192	152490	78325	126582	70355	90067	97899	88460	75391	131368	150191	125307	125283	139521	92733	139517	123933	112964
unknown1073	0.475047	0.82037	24	18	5856.61	0.335047	1	20	12	20706.5	0.451677	1	22	14.85	16595.2	8083.43	0.487094	24768	10807	20757	8950	11610	12351	10180	8998	20189	24170	17977	20490	21602	12610	22535	18732	16670.4
unknown1078	0.475047	0.82037	24	18	3527.23	0.884906	1	23.52	17.9999	24132	0.784673	1	23.76	18.0018	19293.5	5157.64	0.267325	21693	13161	33704	10728	14889	19967	11780	10127	14745	21443	14746	25850	26508	16903	19866	33251	19335.1
unknown1652	0.475047	0.82037	18	3	409.768	0.998371	1	23.1496	7.21e-05	2380.25	0.828068	1	20.5748	1.7146	1653.22	796.501	0.481787	1837	553	51	7080	1362	1705	1623	1511	771	943	1101	1068	2362	1158	2944	1603	1729.5
unknown1402	0.587657	0.930388	18	6	1413.86	0.999854	1	28	6	7391.75	0.900017	1	23	6.29762	6461.45	628.082	0.0972045	7964	3326	5628	1833	6166	7099	8715	7587	5525	5547	4913	5365	9602	4739	10097	8931	6439.81
unknown169	0.587657	0.930388	18	6	2074.65	0.99807	1	28	5.99999	15799.2	0.899458	1	23	6.29762	13986.2	1870.59	0.133745	14916	11419	11492	6847	13855	15599	16702	17041	13927	13176	13593	12506	17899	11334	16859	15583	13921.8
unknown251	0.587657	0.930388	18	6	1957.45	0.99437	1	28	6	9726.75	0.898294	1	23	6.29762	8789.72	336.452	0.0382779	10263	5078	7124	3067	7026	8803	10286	12792	8458	7233	7416	4348	13163	8506	14675	12212	8778.12
PC 35:4	0.719948	1	18	6	33.5876	0.999979	1	20	6	227.25	0.956501	1	19	6.01667	211.495	20.0761	0.0949244	242	119	123	247	174	280	204	251	95	211	183	152	372	176	314	202	209.062
unknown1182	0.719948	1	24	18	6144.4	0.463374	1	20.1831	12	19652	0.699836	1	22.0915	14.8517	15843.5	7671.18	0.484185	25352	9457	19367	6091	10298	11722	9621	8183	18863	23808	16720	19217	22621	11507	23253	18435	15907.2
unknown1188	0.719948	1	18	15	50913.5	0.867265	1	20	12	337425	0.918463	1	19	13.6167	282901	60045.7	0.212249	374562	257238	298310	119887	263257	293306	236394	135184	333820	412057	261843	341981	368325	201262	321302	298391	282320
unknown1664	0.719948	1	24	18	8133.5	0.68568	1	28	17.9999	64197.2	0.842135	1	26	18.1071	49136.2	5250.8	0.106862	62115	31985	45578	19991	52363	47739	38042	34469	45768	59376	43353	44146	85505	44958	72252	54074	48857.1
unknown201	0.719948	1	18	3	144.25	0.926016	1	28	6	9445.25	0.936984	1	23	4.38095	9230.26	1659.81	0.179823	11043	6136	7902	2854	7399	8084	10470	11828	7789	8344	8577	6238	14187	8582	14755	13120	9206.75
unknown1368	0.873774	1	24	18	1183.34	0.953724	1	20	12	7737	0.985269	1	22	14.85	6814.36	1883.69	0.276429	5579	9528	4998	7076	4780	6502	5537	4993	5226	8582	7726	9414	9300	4107	9990	5972	6831.88
unknown1569	0.873774	1	18	6	1054.3	1	1	28	6	4018.5	0.991675	1	23	6.29762	3467.61	422.11	0.121729	4690	2086	2127	1258	3742	4088	4033	4211	2707	3741	3254	2067	4885	1941	7088	3331	3453.06
unknown1582	0.873774	1	24	18	1182.99	0.799889	1	21.253	17.9999	6304.75	0.949287	1	22.6265	18.0665	5430.4	681.386	0.125476	6813	3154	7060	3686	4575	4111	4153	4093	5164	7936	6186	5303	8690	6655	5862	4012	5465.81
unknown1663	0.873774	1	18	3	124.451	0.982702	1	28	6	2415	0.989505	1	23	4.38095	2460.55	188.649	0.0766697	4013	1445	1881	1352	1786	2318	2585	2971	2658	1672	2129	1591	3598	2627	3503	3197	2457.88
unknown1721	0.873774	1	24	15	6702.67	0.998728	1	26.9725	17.9999	46159.2	0.991525	1	25.4862	16.4685	38039.6	6926.81	0.182095	39459	13252	9846	74391	28133	31157	39576	29030	33841	40174	47395	35742	58397	31173	61665	33402	37914.6
unknown248	0.873774	1	18	3	394.212	0.736817	1	28	6	13722.5	0.927313	1	23	4.38095	13715.1	3676.03	0.268028	11446	3844	10579	3789	9874	13656	20126	11234	15658	10715	7620	8878	24090	12981	20372	33746	13663
unknown859	0.873774	1	18	3	60.1041	0.759379	1	28	6	2609.75	0.935696	1	23	4.38095	2708.09	359.41	0.132717	3168	1432	2003	1153	2224	2841	2283	3091	3563	2007	1648	1707	5182	2519	4530	3897	2703
CAR 12:1	1	1	18	9	91.5703	0.999679	1	24.7059	12	730	1	1	21.3529	10.5239	656.793	78.8431	0.120043	660	524	576	451	474	379	944	909	499	1089	821	511	914	583	576	459	648.062
LPC 20:0	1	1	24	18	1824.16	0.757487	1	28	17.9999	10962	0.967878	1	26	18.1071	8022.83	353.502	0.044062	8178	4042	6876	2651	7176	7484	8011	8861	9850	9318	6056	6315	12535	4965	13342	13006	8041.62
unknown1000	1	1	18	9	293.096	0.998616	1	28	6	3651	0.999999	1	23	8.21429	3520.27	136.299	0.0387184	3003	3390	3741	2077	3833	3824	3258	3689	3316	3785	4181	2913	4513	2746	4597	3359	3514.06
unknown1211	1	1	18	9	3664.23	0.891144	1	28	12	53690.8	0.993848	1	23	10.6786	50900.6	2347.12	0.0461118	42043	49825	57159	30288	51255	56494	49157	47974	46899	51976	55812	60076	55629	47929	54274	56051	50802.6
unknown1242	1	1	24	0	121.976	0.999982	1	24.5682	6.63e-05	1271.25	1	1	24.2841	3.28e-05	1206.38	215.276	0.178449	1402	1076	269	2338	1309	1235	816	980	824	1207	1409	894	1340	959	2070	1143	1204.44
unknown1272	1	1	18	3	76.7211	0.999997	1	25.5652	6.63e-05	3164.5	1	1	21.7826	1.81525	2666.7	360.99	0.135369	2789	2172	808	6889	2490	2730	2558	2136	2046	2440	2634	2352	2634	2072	4022	2182	2684.62
unknown1283	1	1	18	12	27957.2	0.992614	1	26.0177	12	301533	0.999973	1	22.0088	12.4118	272369	26492.8	0.0972681	380849	266241	113974	169760	269828	258388	296217	240232	248366	350202	333451	274112	296225	227543	359966	250448	270988
unknown1294	1	1	24	0	151.321	1	1	25.1282	17.9999	2913.5	1	1	24.5641	21.08	2860.49	228.568	0.0799052	3563	2602	1078	5203	2688	2748	3068	2279	2899	2563	2973	2355	2828	2471	3499	2856	2854.56
unknown1339	1	1	18	9	11051.2	0.99696	1	27.1385	12	120908	0.999995	1	22.5692	10.6321	109696	9326.14	0.0850182	160712	105193	48278	50059	110300	104185	120479	104830	96372	145470	132568	109220	129247	86279	149470	93526	109137
unknown1410	1	1	18	9	6892.17	0.997982	1	26.9725	12	51464	0.999998	1	22.4862	10.6236	46539.5	4060.04	0.0872384	69699	41644	14468	28297	46511	44248	52154	43329	40677	60138	59025	46016	52634	35225	66364	40082	46281.9
unknown1423	1	1	18	15	1155.06	0.999612	1	28	12	8665	1	1	23	14.5119	8328.79	1871.28	0.224677	13128	11802	5600	9421	8338	7679	7873	6429	6929	9398	9994	8339	9048	4977	8341	5874	8323.12
unknown1424	1	1	24	0	1006.92	0.881835	1	28	6	3185.25	0.992726	1	26	2.78571	3733.88	1203.84	0.32241	3925	1876	5803	957	1421	3345	4637	3338	2673	3665	2178	2435	6324	1866	8664	6755	3741.38
unknown1439	1	1	18	15	237.588	0.999528	1	27.1385	17.9999	1580.25	1	1	22.5692	16.8885	1646.84	828.46	0.503062	2423	1202	111	6406	1103	1355	1337	766	1337	1610	1691	1205	1402	1086	2510	1323	1679.19
unknown1468	1	1	18	12	2001.11	0.999945	1	20.9501	12	27091.2	1	1	19.4751	12.0692	24217	2693.73	0.111233	37159	24630	17582	7783	23447	21860	24376	22131	20619	34567	29032	24147	27083	16790	32417	19065	23918
unknown1475	1	1	18	6	373.706	0.941344	1	28	6	2475.25	0.998245	1	23	6.29762	2335.04	51.9075	0.0222298	1962	1656	2045	893	1893	2253	2577	3178	2329	2249	1825	1368	3260	1965	4436	3443	2333.25
unknown1488	1	1	24	15	323.501	0.999999	1	28	17.9999	5125	1	1	26	16.4821	4593.41	83.593	0.0181984	7852	4210	574	3159	4340	4524	4559	4368	3598	6673	5459	3707	6237	2765	8088	3410	4595.19
unknown1514	1	1	18	12	197.813	0.999777	1	20.2759	12	2735	1	1	19.1379	12.0426	2544.75	201.007	0.0789891	2601	2397	3205	1335	2095	2672	3116	2207	2759	2851	2521	2809	2623	2168	2371	2612	2521.38
unknown1574	1	1	18	12	1323.17	0.99953	1	20	12	17926.8	1	1	19	12.0333	15385.2	2943.12	0.191296	20359	17253	15471	1198	25284	11393	9678	15820	14984	23765	15702	17256	13690	15555	16146	7046	15037.5
unknown1586	1	1	18	6	1027.07	0.999928	1	28	5.99999	9485	1	1	23	6.29762	8843.49	638.29	0.0721762	8862	6277	10295	2451	8106	7557	12749	9528	5171	10652	10094	7179	12295	7576	13921	8431	8821.5
unknown1587	1	1	18	6	352.846	0.944464	1	28	6	3172.5	0.998428	1	23	6.29762	2761.7	188.226	0.0681556	857	891	919	618	951	2148	3693	5898	933	689	1109	1106	9111	716	7555	7097	2768.19
unknown1588	1	1	18	15	232.285	0.999207	1	28	18	2042	1	1	23	16.9762	2335.43	1169.65	0.500827	2559	1477	993	9868	1324	2107	1557	1789	1693	1812	2395	2123	2154	1327	3061	1626	2366.56
unknown1590	1	1	18	15	260.569	0.994319	1	28	17.9999	2131	0.999984	1	23	16.9762	2997.74	3438.46	1.14702	2777	1301	199	25000	1244	1516	1307	1094	1326	1550	1789	1801	2140	1231	3642	1511	3089.25
unknown1608	1	1	18	6	988.005	0.999969	1	20	6	4896.75	1	1	19	6.01667	4011.19	1095.47	0.273104	2218	3315	4964	1056	3356	2952	6891	6388	1684	4135	5119	3016	4649	3649	5481	3182	3878.44
unknown1637	1	1	24	18	89.8026	0.999994	1	28	17.9999	2765.25	1	1	26	18.1071	2367.38	65.932	0.0278502	3593	2127	280	2374	2328	2368	2219	2186	1842	2936	2615	1893	3430	1570	4134	1927	2363.88
unknown239	1	1	24	18	2291.56	0.948026	1	28	17.9999	27504.5	0.998625	1	26	18.1071	23365.1	281.331	0.0120407	27402	19409	23073	10583	19356	20831	23151	26798	26263	23709	21770	21239	30605	18553	32516	28344	23350.1
unknown346	1	1	18	9	1151.17	0.965461	1	28	6	22872	0.999397	1	23	8.21429	21845.3	967.44	0.044286	22838	20231	20199	15157	21933	21962	23246	24347	22718	22762	21385	21091	24721	20025	23635	22570	21801.2
unknown416	1	1	18	6	701.096	0.996304	1	28	6	3929.5	0.999993	1	23	6.29762	3749.52	67.572	0.0180215	5210	2424	2586	2174	3611	3582	4041	4484	3626	3494	3877	2304	4963	3902	4971	4706	3747.19
unknown499	1	1	18	9	5745.24	0.995765	1	28	6	21742.2	0.999991	1	23	8.21429	17115.4	447.531	0.0261478	8821	7137	8887	2891	8091	22433	25707	30738	12345	12964	8542	8475	37263	9265	43599	27015	17135.8
unknown532	1	1	18	9	1771.3	0.960951	1	28	6.00002	25823	0.999227	1	23	8.21429	25281.7	344.086	0.0136101	29535	23000	16189	17932	27840	23466	26901	25085	23372	25959	24947	25659	33206	24817	31959	24390	25266.1
unknown691	1	1	24	18	246.78	0.945007	1	28	6	1277.75	0.998459	1	26	25.5357	1296.6	146.273	0.112813	1191	860	1048	600	1183	1013	1372	1543	1541	1554	1007	849	1461	712	2424	2249	1287.94
unknown942	1	1	18	9	441.942	0.972167	1	28	6	2855.5	0.999609	1	23	8.21429	2663.63	200.536	0.0752868	2449	1888	2738	472	1936	2277	3440	3769	3272	3016	2107	2411	3329	2034	3563	3771	2654.5

## Sheet: unique cycling in proteinAS
CycID	JTK_pvalue	JTK_BH.Q	JTK_period	JTK_adjphase	JTK_amplitude	LS_pvalue	LS_BH.Q	LS_period	LS_adjphase	LS_amplitude	meta2d_pvalue	meta2d_BH.Q	meta2d_period	meta2d_phase	meta2d_Base	meta2d_AMP	meta2d_rAMP	0	0.1	0.2	0.3	6	6.1	6.2	6.3	12	12.1	12.2	12.3	18	18.1	18.2	18.3	ProteinS
unknown1280	0.000171384	0.0611596	18	6	2209.53	0.461247	1	20	6.00001	8652.5	0.000825715	0.302705	19	6.01667	6777.97	1980.76	0.292235	6323	5319	6873	3393	9304	8398	8475	8433	5371	4468	4855	5282	7599	5526	7170	7818	6537.94
unknown1311	0.000171384	0.0611596	18	6	876.459	0.311841	1	20	6	3176.75	0.000579172	0.302705	19	6.01667	2435.71	780.545	0.320459	2280	1950	2356	1175	3273	3042	3197	3195	1920	1720	1676	1859	2643	1948	2593	2631	2341.12
unknown1426	0.000171384	0.0611596	18	15	5788.73	0.194256	1	20	12	16178.8	0.000376543	0.302705	19	13.6167	12554.5	6881.51	0.548133	19701	13250	15320	13109	8321	4914	7818	3518	15996	16473	17561	14685	12182	10291	14387	12279	12487.8
unknown1430	0.000320124	0.0611596	18	15	3037.73	0.418394	1	20	12	7760.5	0.00132842	0.302705	19	13.6167	4998.82	3924.48	0.785082	7366	5074	6868	4415	2207	2482	2829	1731	6747	8362	9875	6058	3474	2330	6035	3520	4960.81
unknown1360	0.000572095	0.0611596	18	15	178994	0.205951	1	20	12	468438	0.0011837	0.302705	19	13.6167	353595	202588	0.572939	566342	362365	449245	314852	230051	137668	221370	93245	477851	484965	502066	408870	339065	291795	392795	353590	351633
Cer 37:2;3O	0.000987235	0.0714949	18	15	10397.3	0.812623	1	20	12	20806.5	0.00652076	0.357794	19	13.6167	14071.8	11787.7	0.83768	26540	16304	27043	8473	4573	4119	7823	4565	19273	21718	21004	21231	8254	8658	15473	8272	13957.7
unknown1555	0.000987235	0.0714949	18	15	9849.47	0.486604	1	20	12	19069.8	0.00415103	0.302705	19	13.6167	12768.2	10974.6	0.859526	23513	15594	20411	10150	4330	3032	5478	3486	18867	19845	19371	18196	7348	10305	14361	8303	12661.9
Cer 39:2;3O	0.00164724	0.0821791	18	15	5378.61	0.924808	1	20	12	9224	0.0114053	0.398658	19	13.6167	6198	5853.46	0.944411	14955	7038	12735	3268	1353	1271	2668	1449	9205	10398	8149	9144	3507	3676	6371	3074	6141.31
Cer 39:2;3O|Cer 16:2;2O/23:0;(2OH)	0.00164724	0.0821791	18	15	4865.42	0.884056	1	20	12	8696	0.0109683	0.398658	19	13.6167	5636.44	5434.59	0.964188	12845	6192	11361	2846	1313	1339	2445	1372	8675	9337	7606	9166	3317	3221	5494	2812	5583.81
NAGly 14:1	0.00164724	0.0821791	18	15	1783.32	0.835314	1	20	12	4500	0.0104416	0.398658	19	13.6167	2973.65	2280.75	0.766986	5604	4535	2485	2088	1613	1522	1275	1212	3307	5201	6430	3062	2086	1282	3698	1825	2951.56
PE P-36:2 or PE O-36:3	0.00164724	0.0821791	18	15	5019.75	0.274378	1	20	12	11073.2	0.00393297	0.302705	19	13.6167	7621.47	5179.55	0.6796	11721	8655	10807	3605	3070	2771	4589	3216	13014	11668	9183	10428	6252	5227	9074	7861	7571.31
unknown1186	0.00164724	0.0821791	24	21	1003.38	0.118796	1	25.2722	17.9999	4589.99	0.00186665	0.302705	24.6361	19.5517	3262.45	1120.87	0.343566	3863	3164	4245	1946	1940	2101	2437	2334	2469	3515	2863	2490	5745	3245	5070	4300	3232.94
unknown1322	0.00164724	0.0821791	18	15	21100.8	0.488181	1	20	12	54388.8	0.00653432	0.357794	19	13.6167	40874.6	23338.8	0.570985	61110	43645	63193	32219	22948	16076	28310	20042	49876	63165	50803	53711	31601	32794	47118	33767	40648.6
unknown1584	0.00164724	0.0821791	18	15	18126.7	0.954333	1	20	12	39293.5	0.01172	0.398658	19	13.6167	24442.3	23705	0.969833	52406	38064	28653	19944	11089	9678	8812	6884	27148	46951	60326	22749	13309	9168	21734	10489	24212.8
unknown1646	0.00164724	0.0821791	24	18	4879.04	0.121407	1	25.8651	17.9999	12861.7	0.00190333	0.302705	24.9326	18.0252	6911.95	4656.29	0.673658	10903	1799	3762	2915	776	1141	3920	1640	8709	4112	7234	10174	7961	12070	10704	20712	6783.25
unknown1662	0.00164724	0.0821791	18	15	11298.9	0.700177	1	20	12	20631.5	0.00895593	0.398658	19	13.6167	12951.2	13238.4	1.02218	26069	13976	23873	10808	3016	1586	5105	1546	21118	25871	16576	18961	4224	7405	18578	6456	12823
CL 72:7|CL 18:1_18:2_18:2_18:2	0.00267199	0.107118	18	15	285.318	0.349198	1	20	12	920.75	0.00744302	0.379763	19	13.6167	636.082	363.438	0.571369	977	603	716	354	392	322	519	326	920	1003	1017	743	533	339	762	595	632.562
NAPhe 14:1	0.00267199	0.107118	18	15	46336.4	0.997701	1	20	12	79217.8	0.018467	0.493552	19	13.6167	55378.2	48756.4	0.880426	124413	99998	87121	44454	26796	22093	21090	16108	59716	92953	111887	52315	29124	21295	43196	25938	54906.1
unknown1051	0.00267199	0.107118	18	15	1732.06	0.104138	1	20	12	5113.5	0.00255633	0.302705	19	13.6167	3870.95	1949.98	0.503749	5722	3781	3301	4040	1769	1909	2630	1962	5388	5511	5009	4546	3608	3588	5302	3567	3852.06
unknown1062	0.00267199	0.107118	24	15	682.004	0.101216	1	28	17.9999	2646.5	0.0024923	0.302705	26	16.4821	2071.01	65.1919	0.0314783	1828	1066	1345	483	1591	1793	2087	1751	2185	2398	3740	2261	3327	2335	2732	2192	2069.62
unknown1126	0.00267199	0.107118	18	15	7815.3	0.867696	1	20	12	16071.5	0.0163843	0.459785	19	13.6167	12506.6	8756.82	0.700175	26209	15907	14932	18605	5147	4960	6152	3985	15186	18080	18703	12317	9691	5936	13134	9805	12421.8
unknown1372	0.00267199	0.107118	18	15	6165.26	0.740418	1	20	12	14187.2	0.0142948	0.45195	19	13.6167	9873.21	7204.9	0.729742	16685	11178	16914	6911	3858	4034	6467	4081	12167	15581	14636	14365	6147	7271	10394	6166	9803.44
unknown1450	0.00267199	0.107118	18	15	19475.1	0.265959	1	20	12	41621.2	0.00586233	0.34634	19	13.6167	29954.9	20383.3	0.680468	52051	30307	44454	20763	16272	8984	15067	6658	41243	45184	43415	36643	30052	21936	34682	28409	29757.5
unknown1493	0.00267199	0.107118	18	15	17459.9	0.728027	1	20	12	40794	0.0140884	0.451836	19	13.6167	28981.2	20186.7	0.696544	49603	32903	47882	20808	11567	12465	19341	12105	36061	44697	41442	40976	18805	22300	31236	18381	28785.8
unknown1617	0.00267199	0.107118	18	15	1591.34	0.24398	1	20	12	4448.25	0.00543409	0.329717	19	13.6167	3150.56	1955.1	0.620556	4932	3354	3015	3013	1115	1394	2569	1218	4848	4594	4078	4273	2348	2513	4295	2547	3131.62
Cer 35:2;3O|Cer 16:2;3O/19:0	0.00421867	0.13726	18	15	4739.03	0.719189	1	20	12	11703.5	0.0206249	0.511734	19	13.6167	8574.17	5432.45	0.633582	14085	9478	14690	5439	3580	3957	5756	4127	10112	12540	12103	12059	6410	6605	9195	6209	8521.56
Cer 37:2;3O|Cer 16:2;2O/21:0;(2OH)	0.00421867	0.13726	18	15	10944.2	0.857803	1	20	12	21915	0.0239622	0.511734	19	13.6167	15027.6	12421.4	0.826575	30163	18127	28283	8187	4712	4660	8490	4675	20145	23060	22054	22401	8779	9492	16420	8869	14907.3
LPC 20:1	0.00421867	0.13726	24	18	395.273	0.189211	1	23.3952	17.9999	1351	0.00649201	0.357794	23.6976	18.0029	981.924	307.095	0.312748	986	491	1515	584	437	373	995	562	1081	1129	1016	1188	1147	1171	1585	1501	985.062
unknown1367	0.00421867	0.13726	18	6	1310.45	0.296708	1	20	5.99999	5523	0.00961722	0.398658	19	6.01666	4445.66	1207.15	0.271535	3739	3333	3464	3483	5657	5525	5520	5390	3219	4115	3993	3546	4550	3955	4845	4456	4299.38
unknown1403	0.00421867	0.13726	18	15	18157.3	0.995	1	20	12	34768.5	0.027172	0.511734	19	13.6167	25275.6	19614	0.776004	56182	34579	45552	17975	13470	10576	12444	8092	30848	41208	43401	23617	15669	11776	21222	14760	25085.7
unknown702	0.00421867	0.13726	18	15	2999.55	0.368909	1	20	12	7979.25	0.0116185	0.398658	19	13.6167	5846.78	3178.66	0.54366	9123	5204	7628	3877	2751	3053	3650	3512	8540	7823	8762	6792	5575	3826	8413	4527	5816
CL 72:9|CL 18:2_18:2_18:2_18:3	0.0065055	0.155371	18	15	133.643	0.711825	1	20	12	383.5	0.0295213	0.515656	19	13.6167	262.65	170.357	0.64861	467	324	289	130	88	161	224	118	355	462	431	286	198	123	271	249	261
Cer 37:1;4O|Cer 22:0;3O/15:1;(2OH)	0.0065055	0.155371	18	15	4995	0.812981	1	20	12	11684.8	0.0330138	0.517839	19	13.6167	8286.43	5633.23	0.679814	14149	8954	13975	5748	3527	3826	5896	3860	10907	12241	11908	11683	5270	5813	8662	5291	8231.88
Cer 37:2;3O|Cer 15:2;2O/22:0;O	0.0065055	0.155371	18	15	6256.13	0.485418	1	20	12	13499.8	0.0213405	0.511734	19	13.6167	9458.86	6568.14	0.69439	16663	10266	14921	4141	2925	3109	5679	4553	15490	14005	12442	12062	7311	7283	11821	7653	9395.25
PE P-36:1 or PE O-36:2	0.0065055	0.155371	18	15	15477.2	0.309736	1	20	12	36320	0.0145223	0.45195	19	13.6167	25868.1	16159.9	0.624705	37898	26621	39642	12997	11007	9314	16029	11710	46238	36689	29316	33037	22693	19274	34482	24438	25711.6
PE-Cer 35:2;3O|PE-Cer 17:0;2O/18:2;O	0.0065055	0.155371	18	15	2423.25	0.695405	1	20	12	6121.5	0.0289459	0.515656	19	13.6167	4741.62	2587.58	0.545715	7172	4669	8559	3350	2332	2277	3220	2350	5768	7106	5457	6155	3727	3939	5625	3759	4716.56
PI O-34:1|PI O-18:0_16:1	0.0065055	0.155371	18	15	4284.36	0.656749	1	20	12	8217.25	0.0275812	0.511734	19	13.6167	5732.24	4807.41	0.83866	9832	7026	10851	5012	1778	948	2991	1155	8075	9069	7978	7747	2529	4048	8544	3388	5685.69
unknown1269	0.0065055	0.155371	18	0	5310.73	0.501105	1	20	17.9999	17404.5	0.0219265	0.511734	19	18.05	14248.9	6000.46	0.421119	35139	16302	26953	10418	5847	6849	8365	7228	14475	12752	20834	14062	15916	14987	21980	16735	15552.6
unknown1303	0.0065055	0.155371	18	6	6406.03	0.82519	1	20	6	13087	0.0334295	0.517839	19	6.01667	6705.25	7334.1	1.09379	351	75	63	44	13409	9113	15714	14112	286	181	124	97	13145	11733	8975	5642	5816.5
unknown1348	0.0065055	0.155371	18	15	2136.7	0.608151	1	20	12	13710.8	0.0258444	0.511734	19	13.6167	11910.1	2569.66	0.215755	14585	10899	13192	11040	10170	9969	10826	9136	12099	15291	13583	13870	12371	9253	13144	10735	11885.2
unknown1452	0.0065055	0.155371	18	6	535.633	0.998201	1	20	6	3028.25	0.0392024	0.542617	19	6.01667	2498.71	617.569	0.247155	2302	1800	1826	1629	3028	2304	3940	2841	1546	1946	1698	1822	2909	2198	4445	2548	2423.88
unknown1585	0.0065055	0.155371	18	15	4805.85	0.982989	1	20	12	10061.5	0.0387032	0.542617	19	13.6167	6638.27	5771.35	0.869406	15384	9492	9439	3586	3542	3129	2669	1869	7333	12759	13508	6646	4565	2320	5837	3240	6582.38
unknown1689	0.0065055	0.155371	24	21	1489.17	0.150656	1	26.4865	17.9999	4594.98	0.00777004	0.387639	25.2432	19.6214	1656.05	2156.79	1.30237	4783	200	155	272	82	0	290	0	0	0	466	149	6206	2106	5051	5017	1548.56
unknown587	0.0065055	0.155371	18	3	259.331	0.540902	1	27.8233	6.63e-05	3908.5	0.0233989	0.511734	22.9117	1.90933	4088.67	1067.62	0.261115	4253	4185	4269	2927	3780	4004	3944	3861	3482	3553	3946	3118	5680	4056	5924	4753	4108.44
unknown616	0.0065055	0.155371	18	3	3733.17	0.169435	1	24.5682	6.63e-05	25520	0.00860906	0.398658	21.2841	1.77371	22241.3	9270.71	0.416824	34113	24050	28024	15893	18956	20741	18678	17963	12597	14853	23783	13485	32619	25948	32347	31777	22864.2
unknown977	0.0065055	0.155371	24	18	76813.5	0.1977	1	22.1053	17.9999	213465	0.0098468	0.398658	23.0526	18.0304	128779	75634.5	0.587318	134402	29853	225800	95003	13976	16775	66383	19109	261325	100146	96973	188370	113152	241856	182775	316078	131374
CAR 14:0	0.00980952	0.174781	18	15	23620.5	0.400912	1	20	12	58684.2	0.025714	0.511734	19	13.6167	43417.4	23253.3	0.535575	65397	19364	64507	44364	23885	19293	31158	22188	65459	57345	47432	64501	36563	37783	43149	48687	43192.2
CL 72:8|CL 18:2_18:2_18:2_18:2	0.00980952	0.174781	18	15	2153.14	0.685782	1	20	12	5935.5	0.0403739	0.546021	19	13.6167	3879.71	2777.49	0.715901	6845	5073	4143	2079	2340	1752	3052	1764	6171	6485	6534	4552	2583	1757	3578	2937	3852.81
Cer 35:2;3O|Cer 17:1;2O/18:1;(3OH)	0.00980952	0.174781	18	15	4187.13	0.784521	1	20	12	9347.25	0.0451518	0.561442	19	13.6167	6736.97	4508.56	0.669227	11990	7031	11567	4206	2581	3001	4509	3039	8159	10959	9257	9014	4746	5024	7532	4478	6693.31
FA 15:1	0.00980952	0.174781	18	15	6303.86	0.531982	1	20	12	13894	0.0326445	0.517839	19	13.6167	9676.99	6671.73	0.689443	19108	6094	15357	5142	4436	4134	4541	3305	12325	17636	13246	12369	9844	6706	11449	8106	9612.38
LPC 14:0	0.00980952	0.174781	24	18	22971.1	0.160122	1	25.8651	17.9999	77302.8	0.0117117	0.398658	24.9326	18.0252	46158.5	26090.7	0.565243	42496	17349	62607	31151	10125	11439	48306	12277	74594	28196	29022	50223	51847	88433	67470	101462	45437.3
LPE O-22:0	0.00980952	0.174781	18	15	1216.93	0.957567	1	20	12	2722.75	0.0532389	0.601055	19	13.6167	2071.15	1415.63	0.6835	3409	2730	4044	1899	787	585	1767	682	2516	3154	2427	2794	1066	1644	2436	979	2057.44
unknown1030	0.00980952	0.174781	18	3	1875.95	0.194742	1	26.4865	6.63e-05	14038.5	0.0138699	0.451273	22.2432	1.85363	14067.9	8950.95	0.636266	19645	12186	17754	6569	9069	10811	10709	12971	7673	9706	12061	7178	28430	16196	26671	22538	14385.4
unknown1072	0.00980952	0.174781	24	18	1976.54	0.223256	1	22.1053	17.9999	6285.49	0.0156014	0.459212	23.0526	18.0304	3959.56	2177.81	0.550014	4746	1274	6566	3097	900	735	2359	925	6912	2663	3242	5987	3572	6641	5289	9640	4034.25
unknown1178	0.00980952	0.174781	18	3	1813.38	0.268772	1	25.4179	6.63e-05	14595.7	0.018293	0.493552	21.7089	1.80911	13235.2	6975.53	0.527045	23133	12254	14868	8128	10605	12744	9264	10012	8656	8243	12101	7134	25524	14125	19735	21051	13598.6
unknown1181	0.00980952	0.174781	24	18	2334.87	0.147626	1	23.7736	17.9999	7210.49	0.0109153	0.398658	23.8868	18.0004	4667.73	1955.47	0.418935	4676	2441	6656	1437	1669	1018	3800	1831	7932	4347	4219	5933	4385	7063	7890	9504	4675.06
unknown1309	0.00980952	0.174781	18	15	5628.22	0.146259	1	20	12	21189	0.0108276	0.398658	19	13.6167	13730.3	7929.46	0.577516	14696	8953	11693	10097	7584	9287	9080	6204	19091	23778	20576	21311	9816	8413	26736	11141	13653.5
unknown1374	0.00980952	0.174781	24	18	822.012	0.26623	1	26.1721	17.9999	3317.49	0.0181448	0.493552	25.0861	18.0338	1881.09	1223.99	0.650682	1030	587	3838	1058	496	431	1733	629	2147	983	1476	1799	2094	3953	2563	4660	1842.31
unknown1523	0.00980952	0.174781	18	15	2672.69	0.739941	1	20	12	8127.25	0.0430107	0.554937	19	13.6167	6286.83	3247.9	0.51662	7442	5592	10958	6559	3638	3293	4821	2750	8204	8535	9382	6388	4000	3955	8589	5980	6255.38
unknown1597	0.00980952	0.174781	18	15	6711.15	0.781681	1	20	12	15861	0.0450161	0.561442	19	13.6167	11710.9	7458.7	0.636902	22561	8719	12014	16716	5406	5582	6968	4560	15138	20979	15265	12062	9259	5657	15267	10066	11638.7
unknown1656	0.00980952	0.174781	18	15	4413.05	0.591423	1	20	12	10249.8	0.0356775	0.526948	19	13.6167	6372.03	5237.2	0.821905	14006	3277	8633	2711	2393	2660	3485	2391	8403	13294	10331	8971	6513	3006	5983	5084	6321.31
unknown1698	0.00980952	0.174781	18	15	5124.4	0.961841	1	20	12	11609	0.0534344	0.601055	19	13.6167	7307.24	6272.09	0.858338	16004	6654	10591	4361	3320	3368	5101	1975	7473	16632	15667	6664	3877	2082	8302	3873	7246.5
unknown1712	0.00980952	0.174781	24	18	2181.42	0.400598	1	24.1644	17.9999	5844.74	0.0256969	0.511734	24.0822	18.0002	3032.79	2478.04	0.81708	2247	230	5764	1807	0	75	826	99	6074	1321	1977	4620	1971	6225	3415	11768	3026.19
unknown541	0.00980952	0.174781	18	15	8885.33	0.211584	1	20	12	22118.5	0.0148972	0.45195	19	13.6167	16693.8	9528.32	0.570771	26873	12918	19478	18233	5648	7000	9861	7303	26220	22737	20982	18535	15525	10300	24772	19239	16601.5
unknown647	0.00980952	0.174781	24	18	43117.3	0.175915	1	22.5575	17.9999	137450	0.0127045	0.425695	23.2788	18.0173	89149.3	41925	0.470279	102328	34116	122322	69096	17738	21428	65719	33154	144462	66749	86261	130318	91214	126451	118283	213851	90218.1
unknown715	0.00980952	0.174781	18	15	6021.72	0.586775	1	20	12	15368.5	0.0354425	0.526948	19	13.6167	11344.3	6547.18	0.577132	19758	10800	17053	5781	4236	4555	8820	6093	16330	17295	14459	13390	9496	9263	14317	8849	11280.9
unknown766	0.00980952	0.174781	18	3	3534.83	0.255713	1	24.9858	6.63e-05	29100.2	0.0175291	0.485837	21.4929	1.79111	25960	11372.4	0.438074	41983	25700	31651	17067	21855	25658	18558	20360	18248	16581	26927	13891	44671	28401	36448	38200	26637.4
LPC 18:1	0.0144977	0.199677	24	18	288724	0.293018	1	22.2166	17.9999	831094	0.0274482	0.511734	23.1083	18.0268	508022	296404	0.583446	520784	108160	970156	356089	50819	56985	333723	74436	1012249	370313	352869	749595	417100	948546	695983	1262753	517535
LPC 18:2	0.0144977	0.199677	24	18	89091.6	0.453902	1	25.8651	17.9999	291667	0.0396388	0.542617	24.9326	18.0252	165206	113605	0.687656	81869	43019	397303	76304	35159	30261	161782	41783	250480	76662	85424	146343	173447	330303	238721	424202	162066
LPG 16:1	0.0144977	0.199677	24	18	614.122	0.154812	1	22.7907	17.9999	1849	0.0159338	0.459212	23.3953	18.012	1207.7	558.771	0.462672	1032	601	804	2011	305	475	1039	182	1995	1044	1029	1599	1275	2403	1822	1896	1219.5
TG 34:0|TG 10:0_12:0_12:0	0.0144977	0.199677	24	21	5863.86	0.157366	1	25.8651	17.9999	21122.4	0.0161593	0.459212	24.9326	19.5835	13901.4	5969.36	0.429409	15773	13404	20571	6602	7180	7562	12853	10089	5856	11908	13403	9101	22502	15484	24755	21749	13674.5
TG 38:1|TG 12:0_12:0_14:1	0.0144977	0.199677	18	3	68134.3	0.263576	1	25.4179	6.63e-05	584621	0.0250948	0.511734	21.7089	1.80911	531047	257984	0.485803	891542	486829	615174	344944	434099	501323	371294	398435	362558	338624	536151	274056	999517	567662	759186	830389	544486
unknown1094	0.0144977	0.199677	24	21	918.178	0.373316	1	20	17.9999	3313.5	0.0336592	0.517839	22	19.525	2754.03	1032.5	0.374905	5802	2586	4838	2211	1334	1456	1916	1393	2502	2641	3303	2354	3074	2727	3896	3557	2849.38
unknown1155	0.0144977	0.199677	18	3	8195.01	0.304178	1	25.2722	6.63e-05	62091.9	0.0283287	0.515656	21.6361	1.80304	55395.9	28672.4	0.517591	98112	52417	64604	33235	46129	50494	39309	41746	35080	33680	55898	27179	108693	58260	79694	86836	56960.4
unknown1162	0.0144977	0.199677	24	21	2163.39	0.45227	1	20	17.9999	8486.49	0.0395199	0.542617	22	19.525	7079.03	2495.83	0.352567	16494	6841	8916	6387	3742	3821	3486	3830	7923	6322	9474	5770	9567	6708	10167	7504	7309.5
unknown1247	0.0144977	0.199677	24	18	2320.02	0.428318	1	22.4427	17.9999	6939.74	0.0377648	0.542617	23.2214	18.0202	3995.81	2543.66	0.63658	4495	617	6673	2459	133	326	1558	557	7733	2539	3044	7167	2846	6759	3991	14163	4066.25
unknown1341	0.0144977	0.199677	18	15	2190.97	0.291777	1	20	12	5053.75	0.0273499	0.511734	19	13.6167	3749.17	2308.59	0.615759	5395	4367	5602	2603	1566	1102	2322	1387	6151	4914	4464	4686	2708	3141	5974	3247	3726.81
unknown1361	0.0144977	0.199677	18	6	3115.16	0.974502	1	20	6	7942.5	0.0743078	0.65697	19	6.01667	4395.08	4158.69	0.946216	659	352	417	192	8368	4670	12558	6174	471	529	447	356	8099	10544	4502	3920	3891.12
unknown1441	0.0144977	0.199677	24	21	1281.98	0.232371	1	24.4321	17.9999	6753.24	0.0225483	0.511734	24.2161	19.5149	5006	1614.21	0.322455	8275	4531	5300	3048	2884	3512	3673	3351	4972	4964	4286	4051	6376	4676	7708	8253	4991.25
unknown1486	0.0144977	0.199677	24	18	14527.9	0.142028	1	20.5594	17.9999	48468.7	0.0147955	0.45195	22.2797	18.1079	34334.4	14291.4	0.416243	40390	12931	51604	42353	9028	10518	29698	8584	50304	36175	31429	47872	31989	58982	52297	50607	35297.6
unknown1659	0.0144977	0.199677	18	15	12421.4	0.451521	1	20	12	30081.2	0.0394654	0.542617	19	13.6167	21607.5	12737.1	0.589477	45648	11280	12043	22454	9023	9743	10929	8653	28334	37126	25408	29457	21180	15922	36023	20523	21484.1
unknown198	0.0144977	0.199677	18	6	735.391	0.999976	1	28	6	3128.5	0.0758762	0.65697	23	6.29762	2389.59	376.431	0.157529	1643	1438	1505	768	1950	2746	4062	3756	1630	1233	1275	1321	4088	1757	5308	3546	2376.62
unknown283	0.0144977	0.199677	18	15	576.822	0.900565	1	20	12	4088.5	0.0697002	0.65697	19	13.6167	3619.56	677.16	0.187084	4759	3899	4125	2139	2587	2843	3289	3596	4319	3918	3902	4215	3765	3376	3444	3632	3613
unknown529	0.0144977	0.199677	24	18	9737.92	0.282303	1	26.3284	17.9999	36052.9	0.0265969	0.511734	25.1642	18.0386	20017.1	13340.7	0.666464	9431	5434	39201	13114	4475	4348	19801	5110	26729	10078	12968	18183	21732	37771	29978	54731	19567.8
unknown547	0.0144977	0.199677	24	18	3301.84	0.103313	1	28	17.9999	13358	0.0112391	0.398658	26	18.1071	9237.33	1920.26	0.207881	8915	3809	8281	4954	5501	5102	9939	6334	11796	9224	9670	9207	12173	9577	14690	16992	9135.25
unknown726	0.0144977	0.199677	24	18	1102.03	0.28437	1	27.3065	17.9999	3730.74	0.0267616	0.511734	25.6533	18.075	2095.49	1218.3	0.581393	1190	665	3926	927	612	427	2798	666	2483	1089	1225	1710	3071	3864	3122	4866	2040.06
unknown809	0.0144977	0.199677	24	18	4508.87	0.372914	1	27.8233	17.9999	15913.2	0.0336288	0.517839	25.9117	18.0985	8725.24	4835.62	0.554211	3322	2920	17040	2477	1937	1793	12743	3094	10786	3866	4466	7541	11531	18502	14657	18963	8477.38
unknown998	0.0144977	0.199677	18	3	1048.29	0.289315	1	25.5652	6.63e-05	11522.7	0.0271546	0.511734	21.7826	1.81525	10617.8	5254.48	0.494873	18236	9000	12021	6834	8276	10471	6048	7966	7590	6637	11564	4755	21202	12165	15181	16113	10878.7
CL 72:10|CL 36:4_36:6	0.0210199	0.239541	18	15	726.552	0.809922	1	20	12	3060.5	0.0863668	0.671246	19	13.6167	2471.77	873.455	0.353372	3402	3088	2627	1803	1801	1590	2349	1733	3065	2995	3540	2642	1998	1713	2792	2275	2463.31
LPC 20:5	0.0210199	0.239541	24	21	236.881	0.177632	1	24.2975	17.9999	804.748	0.024607	0.511734	24.1488	19.5099	493.903	242.099	0.490175	477	221	540	682	197	138	337	102	805	398	115	647	494	903	729	1093	492.375
LPI 18:0	0.0210199	0.239541	18	6	1686.1	0.996553	1	20	6	4319.25	0.101925	0.704773	19	6.01667	2952.49	1639.51	0.555298	2104	887	358	1731	3266	4657	5368	3986	1339	1596	1251	1177	4367	1704	6392	3878	2753.81
PC 35:2 Isomer A	0.0210199	0.239541	24	18	3394.11	0.478637	1	25.5652	17.9999	23309.7	0.0563319	0.616903	24.7826	18.0179	19782	2088.68	0.105585	23919	17989	19129	9274	16727	15683	16786	17485	24316	23056	19573	18548	22780	20635	29039	20785	19732.8
TG 35:0|TG 11:0_12:0_12:0	0.0210199	0.239541	24	21	1428	0.379648	1	20.464	18	4515.99	0.0465306	0.564656	22.232	19.504	3515.29	1381.09	0.392881	7002	3573	6083	2186	1712	1898	2784	2005	2085	2897	4230	3520	4209	3999	5803	4053	3627.44
TG 60:6	0.0210199	0.239541	24	18	971.918	0.367612	1	22.7907	17.9999	3278.5	0.0453045	0.561442	23.3953	18.012	2609.57	408.323	0.156472	3394	1927	2796	780	1907	1614	2108	1790	3560	3152	2375	3374	3979	1955	3738	3442	2618.19
unknown1093	0.0210199	0.239541	24	18	1127.13	0.255716	1	24.2975	17.9999	5174.75	0.0334653	0.517839	24.1488	18.0007	4058.27	722.372	0.178	4522	2012	4068	3258	2103	3298	2989	3500	6076	5258	3512	3582	5760	3721	5824	5394	4054.81
unknown1129	0.0210199	0.239541	18	3	27431.5	0.274751	1	25.4179	6.63e-05	236187	0.0355417	0.526948	21.7089	1.80911	213578	105646	0.494646	367788	191228	254044	131690	171157	197459	150225	158596	140184	133212	210923	120090	410428	226016	305067	337194	219081
unknown1148	0.0210199	0.239541	18	3	203.647	0.637374	1	26.0177	5.29e-05	2394.75	0.0711768	0.65697	22.0088	1.83409	2358.19	629.009	0.266734	2266	3025	2789	1499	2252	2456	2376	1772	2049	2002	2218	1640	3417	2643	2574	3180	2384.88
unknown1161	0.0210199	0.239541	18	15	2498.56	0.448746	1	20	12	5958	0.0534222	0.601055	19	13.6167	4569.26	2479.18	0.542579	8057	4199	6624	2665	1835	1830	2999	2325	6371	6893	5767	4801	4146	3504	6407	4301	4545.25
unknown1197	0.0210199	0.239541	18	6	6007.93	0.899843	1	20	6	12898.5	0.0939643	0.680483	19	6.01667	6757.7	7122.27	1.05395	406	89	95	37	12513	8564	16269	14248	223	185	132	117	14725	10943	10018	5750	5894.62
unknown1363	0.0210199	0.239541	24	0	1641.55	0.181265	1	24.0327	6.63e-05	2691.49	0.0250331	0.511734	24.0163	3.31e-05	1634.81	2094.04	1.28091	4898	1047	4500	321	691	447	238	338	774	313	223	206	1898	2580	3387	4278	1633.69
unknown1393	0.0210199	0.239541	24	18	1178.92	0.605424	1	26.0177	17.9999	4857.98	0.0682633	0.65697	25.0088	18.0293	2625.57	1997.53	0.7608	1801	416	6901	921	306	283	3003	892	2820	1058	1026	2202	3215	4182	3378	8657	2566.31
unknown1480	0.0210199	0.239541	24	0	4251.83	0.108435	1	24.0327	6.63e-05	8560.72	0.0161463	0.459212	24.0163	3.31e-05	6246.73	5002.36	0.800797	12352	6604	12574	2713	2669	3644	4657	3728	2494	2134	4145	3628	9341	8358	9688	11176	6244.06
unknown1606	0.0210199	0.239541	24	18	2501.74	0.171439	1	21.7778	17.9999	7221.99	0.023877	0.511734	22.8889	18.0425	4547.72	2464.31	0.541878	4762	999	7810	4256	473	649	3252	709	7514	3673	3849	7543	4007	8658	6801	9422	4648.56
unknown1710	0.0210199	0.239541	18	15	57734	0.27333	1	20	12	105863	0.0353878	0.526948	19	13.6167	73381.3	53255.9	0.725743	130151	27842	51402	131110	17265	24905	23616	27647	106231	120814	89431	106977	80060	60668	99826	67903	72865.5
unknown308	0.0210199	0.239541	24	18	21251.4	0.249401	1	24.7059	17.9999	73960.2	0.03277	0.517839	24.3529	18.0038	51824.3	18114.4	0.349535	80510	32695	57291	11356	29663	32136	33170	28920	62981	63574	51080	46749	83751	46399	82607	83084	51622.9
unknown577	0.0210199	0.239541	24	18	2067.93	0.250296	1	24.8451	17.9999	9404.74	0.0328687	0.517839	24.4225	18.0054	7280.72	1690.49	0.232187	10951	4966	6397	4072	4666	5812	5448	5290	8033	7982	6970	7928	9308	7457	11148	9706	7258.38
unknown610	0.0210199	0.239541	24	18	473.762	0.303899	1	26.1721	17.9999	3550.25	0.0386683	0.542617	25.0861	18.0338	3072.32	274.465	0.0893347	3600	2677	3032	1725	2336	2754	2775	2803	3193	3419	3071	3432	3562	3134	3582	3923	3063.62
unknown613	0.0210199	0.239541	18	15	4657.18	0.363069	1	20	12	13135.2	0.0448395	0.561442	19	13.6167	10458.1	4616.12	0.441393	15533	10969	14804	5778	5771	4725	7254	6731	13793	14578	11791	12379	9647	8527	13463	10871	10413.4
unknown685	0.0210199	0.239541	18	15	3457.05	0.430859	1	20	12	8874.25	0.0516612	0.597832	19	13.6167	6717.31	3529.77	0.525474	10572	6859	9794	3519	3102	2668	5101	3666	9768	9183	8616	7930	5491	5750	9001	5910	6683.12
unknown696	0.0210199	0.239541	18	15	2442.7	0.856142	1	20	12	5059.25	0.0902968	0.671246	19	13.6167	3955.9	2455.02	0.620598	7257	5035	7560	1962	1646	1406	2231	1837	6062	5357	4589	4229	3523	2482	4712	3026	3932.12
unknown708	0.0210199	0.239541	24	18	675.464	0.337594	1	25.8651	17.9999	2928.5	0.0422095	0.554937	24.9326	18.0252	2173.98	553.255	0.25449	2802	1905	1840	870	1340	1459	1830	1483	2558	2527	2205	2006	3433	1460	3764	3057	2158.69
unknown734	0.0210199	0.239541	24	18	3839.77	0.223304	1	23.7736	17.9999	13310.7	0.0298598	0.515656	23.8868	18.0004	8722.36	4138.23	0.474439	9310	3710	13741	5631	2378	2482	7073	4354	13090	6208	7489	11097	9460	11789	12218	19776	8737.88
unknown808	0.0210199	0.239541	24	21	1035.91	0.158219	1	26.1721	17.9999	4029.99	0.0223026	0.511734	25.0861	19.6016	2682.22	1050.06	0.391487	3100	2678	3627	1133	1568	1606	2395	2152	1506	2170	2463	1660	3964	3067	4426	4663	2636.12
unknown889	0.0210199	0.239541	24	18	4239.28	0.138738	1	21.5648	17.9999	12204.5	0.0199397	0.511734	22.7824	18.0515	8141.53	3676.88	0.45162	9907	3853	12391	5548	2077	2217	4774	3091	13036	6634	8617	11969	8606	11647	10430	18135	8308.25
Cer 30:2;2O|Cer 16:2;2O/14:0	0.0299489	0.256624	18	15	883.883	0.87811	1	20	12	2869.5	0.121979	0.756183	19	13.6167	2262.43	1012.86	0.447684	3210	2473	3491	1471	1204	1183	2345	1225	2456	3255	2853	2914	1841	1491	2743	1887	2252.62
Cer 40:2;3O	0.0299489	0.256624	18	15	2524.72	0.926029	1	20	12	6085.25	0.127162	0.756183	19	13.6167	4478.6	2701.78	0.603263	8451	3981	7852	2137	2098	2109	3351	2273	5993	6861	5813	5674	3315	2758	5527	3046	4452.44
FA 14:1 (physeteric acid)	0.0299489	0.256624	18	15	294456	0.436098	1	20	12	1.1577e+06	0.0697199	0.65697	19	13.6167	960399	318718	0.33186	1378217	803372	1151922	836509	734496	677530	747222	569248	1036561	1299590	1243057	1051598	1082385	732304	1078851	894142	957313
LPC 12:0/0:0	0.0299489	0.256624	24	21	9371.82	0.230268	1	26.0177	17.9999	34456.7	0.0412175	0.550794	25.0088	19.5924	21454.6	10016.6	0.466872	19026	10876	27687	24098	8037	7198	27875	7160	26074	12386	11939	16529	23595	47161	31650	35421	21044.5
LPC 20:2	0.0299489	0.256624	24	18	1233.55	0.548019	1	22.3291	17.9999	3645.75	0.0838635	0.671246	23.1646	18.0234	2439.53	1111.48	0.455611	2137	972	5561	838	701	664	2143	695	4171	2141	1893	3065	2446	3109	3605	5423	2472.75
LPE 12:0	0.0299489	0.256624	24	21	879.994	0.357358	1	28	6.63e-05	1563.5	0.0592627	0.621344	26	24.375	1931.99	946.031	0.489667	1654	608	2555	1437	886	761	3014	953	1635	1010	1228	1368	2689	3403	2749	3815	1860.31
NAPhe 12:0	0.0299489	0.256624	18	15	49044.2	0.961155	1	20	12	214683	0.130913	0.756183	19	13.6167	180218	58558.7	0.324932	314097	151149	183354	147752	129824	126905	132074	127348	184218	252702	246023	175789	162201	109374	288446	143160	179651
PS 36:2|PS 18:1_18:1	0.0299489	0.256624	18	15	14610.9	0.983431	1	20	12	41240	0.133273	0.756183	19	13.6167	30226.2	18013.5	0.595956	60027	43335	27401	22649	19496	19051	14646	19717	33635	47797	49274	34254	26588	11439	35911	15608	30051.8
unknown1019	0.0299489	0.256624	18	15	28761.6	0.460057	1	20	12	63800.5	0.0728134	0.65697	19	13.6167	49944.3	28548	0.571596	88068	52942	84318	24340	20033	15211	29917	20591	71198	67567	60987	55450	44142	43250	72562	44110	49667.9
unknown1090	0.0299489	0.256624	24	18	779.585	0.164171	1	20.1831	17.9999	2949.5	0.0310498	0.517839	22.0915	18.1353	2216.26	784.541	0.353993	3362	1491	3221	1717	1037	1023	1468	1110	3324	2085	2213	2567	2208	2893	2822	3875	2276
unknown1098	0.0299489	0.256624	24	18	3778.78	0.549487	1	26.8085	17.9999	13810.9	0.0840441	0.671246	25.4043	18.0551	6368.79	5747.27	0.902412	977	451	18326	1662	141	156	8548	877	6271	721	1823	3059	6708	20030	8898	19608	6141
unknown118	0.0299489	0.256624	18	3	336.583	0.646508	1	27.1385	6.63e-05	10807.7	0.0957352	0.682303	22.5692	1.8808	10976.2	1348.78	0.122882	11674	12125	11584	7848	9926	10978	10840	9995	9764	10601	10502	10344	13077	10943	13314	12680	11012.2
unknown1227	0.0299489	0.256624	18	15	532.805	0.25147	1	20	12	1657.75	0.0443493	0.561442	19	13.6167	1164.67	585.284	0.502533	1602	1322	982	565	514	688	1043	756	1780	1591	1697	1563	1178	609	1576	1078	1159
unknown1238	0.0299489	0.256624	24	21	900.5	0.15146	1	26.0177	17.9999	4107.24	0.0290114	0.515656	25.0088	19.5924	2960.09	919.471	0.310623	3477	2633	3698	1928	1752	1570	2807	2785	1745	2648	3033	2254	4154	3369	4459	4447	2922.44
unknown1255	0.0299489	0.256624	24	18	7263.05	0.288637	1	21.253	17.9999	22111.2	0.0497124	0.584316	22.6265	18.0665	15818.4	5810.98	0.367356	26729	11282	18983	6061	9218	1342	11283	8739	21554	22089	14671	17530	23256	11399	27467	26323	16120.4
unknown1266	0.0299489	0.256624	24	18	800.091	0.54909	1	26.6465	17.9999	2494.99	0.0839953	0.671246	25.3233	18.0493	1212.08	1019.3	0.840958	384	49	2802	235	0	0	1033	126	2309	275	434	1152	976	2698	1495	4811	1173.69
unknown1325	0.0299489	0.256624	18	6	1673.01	0.995768	1	20	6	4560.5	0.134573	0.756183	19	6.01667	3354.41	1468.64	0.437825	2373	1671	2191	949	4438	3961	5126	4717	2127	1947	1463	2264	5144	2536	5438	4478	3176.44
unknown1345	0.0299489	0.256624	18	15	1298.96	0.578719	1	20	12	4269.75	0.0876168	0.671246	19	13.6167	3419.91	1410.45	0.412423	4580	3385	5248	2269	2238	1657	2736	2297	4111	4800	3995	4173	3192	2664	4198	2957	3406.25
unknown1501	0.0299489	0.256624	24	18	3341.79	0.235127	1	27.1385	17.9999	12371.2	0.0419403	0.554937	25.5692	18.068	8310.06	2801.3	0.337097	11095	4474	7509	2528	4218	5111	5919	5738	9752	10443	6531	8206	14331	5979	15842	13333	8188.06
unknown1546	0.0299489	0.256624	24	18	908.279	0.694787	1	24.8451	17.9999	3038.49	0.101386	0.704773	24.4225	18.0054	1772.66	1255.53	0.708277	1137	411	5162	276	238	174	1596	477	2140	841	1510	1981	2067	2829	1971	5287	1756.06
unknown1592	0.0299489	0.256624	18	9	513.536	0.593162	1	26.8085	6	4685.5	0.0893656	0.671246	22.4043	8.10821	4239.73	469.582	0.110758	3798	4175	3463	2614	4450	5082	4299	4911	4121	4099	4547	4682	4149	4242	3884	4778	4205.88
unknown1638	0.0299489	0.256624	18	6	3808.48	0.998689	1	20	5.99999	10429.2	0.13488	0.756183	19	6.01666	7589.07	3464.44	0.456504	7205	2915	4758	1071	7812	9082	12522	12301	6807	6599	2357	3591	13506	5315	7543	11324	7169.25
unknown1666	0.0299489	0.256624	18	3	248.371	0.245186	1	25.1282	6.63e-05	2685.49	0.0434269	0.557105	21.5641	1.79704	2377.06	1143.65	0.481121	4227	2307	2812	1396	1802	2141	1808	1328	1434	1571	2254	1645	4738	2446	3409	3759	2442.31
unknown1677	0.0299489	0.256624	18	15	3134.78	0.855013	1	20	12	6478	0.119453	0.751452	19	13.6167	4938.45	2872.87	0.581735	11091	3521	6467	2577	1826	1941	2766	1894	6327	7410	7313	4862	3426	2149	10634	4366	4910.62
unknown388	0.0299489	0.256624	24	18	612.001	0.489595	1	27.4766	18	3673.25	0.0765758	0.65697	25.7383	18.0825	2930.64	479.977	0.163779	3687	2451	2797	1158	1975	2275	2794	2428	3279	3142	2542	3305	4443	2546	4369	3335	2907.88
unknown457	0.0299489	0.256624	18	15	1720.04	0.385141	1	20	12	4868.75	0.0630065	0.642953	19	13.6167	3692.74	1766.96	0.478496	5841	3420	4727	2077	1877	2123	2254	2554	4541	5530	5001	4403	3790	2556	4751	3365	3675.62
unknown463	0.0299489	0.256624	24	21	3207.44	0.491491	1	26.6465	17.9999	16525.2	0.0768155	0.65697	25.3233	19.632	12649	2760.94	0.218273	14247	12523	17581	3700	9406	8972	11275	11573	10193	10959	13029	10492	16986	15457	18021	15637	12503.2
unknown522	0.0299489	0.256624	24	18	980.757	0.158545	1	22.1053	17.9999	4600	0.0301514	0.516716	23.0526	18.0304	3648.95	804.97	0.220603	4660	2121	4587	2556	1901	1870	3191	3078	4313	3919	3769	4460	4553	4248	4888	4711	3676.56
unknown524	0.0299489	0.256624	24	18	31052.2	0.440153	1	28	17.9999	102334	0.0702461	0.65697	26	18.1071	57035.9	29411.2	0.515661	25260	15187	111332	13114	13957	12198	87524	19053	81924	27703	26214	44756	82789	109295	92549	124705	55472.5
unknown530	0.0299489	0.256624	24	12	419.138	0.261182	1	23.9024	12	5459	0.0457657	0.561442	23.9512	12.0001	4848.82	632.952	0.130537	4737	4517	4525	3208	4768	4526	4866	5356	5135	5863	5706	5132	5492	4381	4884	4469	4847.81
unknown563	0.0299489	0.256624	18	3	606.344	0.223046	1	24.1644	6.63e-05	5162.24	0.0401377	0.546021	21.0822	1.75688	4401.38	1514.28	0.344046	6993	4830	5975	2851	3601	3922	4054	3551	2739	3104	4542	3201	5728	5184	5824	6138	4514.81
unknown704	0.0299489	0.256624	24	18	3322.34	0.0723126	1	20	12	14393	0.0154522	0.459212	22	14.85	11151	5384.73	0.482893	12546	9911	11432	7644	6301	5547	9667	8173	12975	14869	16751	12977	12086	9478	15040	13820	11201.1
unknown753	0.0299489	0.256624	24	21	8993.69	0.238509	1	26.0177	17.9999	45934.9	0.0424414	0.554937	25.0088	19.5924	33103.5	10068	0.304136	47726	27754	36514	17379	21746	21710	27690	26353	30343	25021	32313	24771	46766	31691	56024	49259	32691.2
unknown829	0.0299489	0.256624	18	15	13380.2	0.493634	1	20	12	29745.2	0.077086	0.65697	19	13.6167	23707.3	13209.1	0.557174	43974	24346	39736	11971	9036	7084	14386	10293	32482	30788	29171	26540	21253	20506	34807	20897	23579.4
unknown837	0.0299489	0.256624	18	6	889.187	0.999872	1	20	5.99999	3250	0.135004	0.756183	19	6.01666	2425.66	1021.98	0.421322	1697	911	2117	508	2351	2167	4546	3936	2042	1456	958	1694	3672	1906	4439	2429	2301.81
unknown871	0.0299489	0.256624	18	15	3710.19	0.356995	1	20	12	9732.25	0.0592134	0.621344	19	13.6167	7607.87	3690.99	0.485154	12715	7932	10204	3518	3361	3446	5013	4269	10057	10822	9445	8605	7275	6550	10644	7298	7572.12
unknown887	0.0299489	0.256624	18	6	759.786	0.999992	1	20	5.99999	3287.25	0.135017	0.756183	19	6.01666	2606.91	879.174	0.337247	1787	1946	1748	640	2845	2352	3803	4149	1482	1919	1608	1754	4154	1922	4453	3444	2500.38
unknown897	0.0299489	0.256624	24	12	580.358	0.242141	1	25.1282	12	7203.5	0.0429781	0.554937	24.5641	12.0063	6575.02	726.201	0.110448	5538	6590	6107	5033	6448	6925	6647	7071	6488	7694	7657	6975	7350	6232	5897	6765	6588.56
unknown917	0.0299489	0.256624	24	21	534.926	0.260869	1	26.6465	17.9999	3403.74	0.0457202	0.561442	25.3233	19.632	2312.03	792.23	0.342655	3485	1672	2315	1166	1611	1596	1634	1858	2211	1608	1888	1664	3842	2080	4074	3619	2270.19
unknown968	0.0299489	0.256624	24	18	806.102	0.37859	1	26.4865	17.9999	3227.49	0.0621294	0.637485	25.2432	18.0437	1660.36	1306.32	0.78677	853	221	4039	803	187	227	2085	269	1520	542	930	1234	2141	3692	2372	4705	1613.75
unknown980	0.0299489	0.256624	18	3	284.964	0.265584	1	24.9858	6.63e-05	4019.74	0.046404	0.564656	21.4929	1.79111	3593.51	1288.36	0.358525	5718	3956	4580	1825	2739	2998	3016	2887	2705	2486	3566	2611	5059	3846	5225	5507	3670.25
unknown1526	0.0359573	0.277096	18	3	61.1647	0.408637	1	26.3284	17.9999	4045.98	0.0767051	0.65697	22.1642	20.5056	1359.36	1698.63	1.24957	5042	403	316	47	0	315	228	331	755	223	0	215	7747	1135	3718	3584	1503.69
CL 70:7|CL 16:1_18:2_18:2_18:2	0.0419656	0.277096	18	15	6530.66	0.778091	1	20	12	22028.8	0.144386	0.77885	19	13.6167	17039.9	7976.4	0.468102	32480	17705	17255	8561	9347	7954	13650	9422	21582	25062	25115	16356	15190	9604	24908	17211	16962.6
Cer 40:2;3O|Cer 16:2;2O/24:0;(2OH)	0.0419656	0.277096	18	15	2117.08	0.745002	1	20	12	5249.25	0.139604	0.759536	19	13.6167	3764.54	2295.14	0.609673	6594	3685	5865	1845	1626	1886	2918	1914	5282	5654	5167	4894	2791	2627	4443	2686	3742.31
LPC 16:1	0.0419656	0.277096	24	18	413610	0.297594	1	27.3065	17.9999	1.46174e+06	0.0672258	0.65697	25.6533	18.075	798844	495889	0.620759	388196	189088	1481619	442096	141469	134580	1091501	226939	1032885	341767	404804	698637	1013650	1650791	1287431	1895089	776284
LPC 17:1	0.0419656	0.277096	24	18	2008.71	0.643189	1	24.1644	18	5822.49	0.124492	0.756183	24.0822	18.0002	3883.34	1766.71	0.454945	2295	1890	8800	1502	1879	1249	3462	1327	5893	3196	2539	4736	3004	6997	5364	7925	3878.62
LPE 17:1	0.0419656	0.277096	24	21	275.772	0.834607	1	20.9501	17.9999	1214	0.152417	0.800295	22.4751	19.4879	927.298	352.47	0.380105	633	447	2527	1127	370	358	905	553	1097	615	860	881	1018	1169	1218	1451	951.812
unknown1024	0.0419656	0.277096	18	0	1077.63	0.978838	1	20	12	6417	0.172209	0.841424	19	15.2	5861.54	1261.19	0.215163	7260	6619	7369	7454	5106	5498	4917	4247	5700	6573	6823	6572	5460	4592	5749	5891	5989.38
unknown1087	0.0419656	0.277096	24	18	2401.69	0.410652	1	21.7778	17.9999	8272.25	0.0872161	0.671246	22.8889	18.0425	6481.39	1534.66	0.23678	9971	4826	7315	2736	4104	4266	4769	3877	8504	8660	5529	7061	9941	5115	9346	8687	6544.19
unknown1127	0.0419656	0.277096	24	15	422.32	0.71866	1	24.7059	12	2988.5	0.135754	0.756183	24.3529	13.5246	2599.03	406.399	0.156366	3560	2275	1114	1798	2366	2463	2587	2294	2769	3021	3171	2993	3072	2583	3009	2551	2601.62
unknown1141	0.0419656	0.277096	24	18	3104.2	0.469811	1	26.8085	17.9999	10818.2	0.097127	0.687855	25.4043	18.0551	5119.96	4346.56	0.848943	1304	362	13175	1841	154	323	6802	699	5349	1005	1378	3498	5835	11887	8127	17424	4947.69
unknown1274	0.0419656	0.277096	18	15	874.691	0.787322	1	20	12	3323	0.145709	0.77885	19	13.6167	2877.33	898.981	0.312436	3790	2557	4796	1986	1665	1820	2371	2213	2821	3396	3482	3593	2816	2600	3344	2648	2868.62
unknown1281	0.0419656	0.277096	18	15	910.754	0.912721	1	20	12	3510.75	0.163256	0.831086	19	13.6167	2791.37	1122.65	0.402185	3917	2917	2899	2572	1779	2098	2090	1502	2786	4090	4764	2403	2174	1300	4829	2368	2780.5
unknown1315	0.0419656	0.277096	24	18	2507.75	0.148948	1	20.3695	17.9999	8303.24	0.0379733	0.542617	22.1848	18.1213	5987.63	2321.31	0.387685	6717	2275	9477	6948	1791	1899	5092	1578	9006	6215	5678	8579	5733	10031	8403	9046	6154.25
unknown1320	0.0419656	0.277096	18	15	8112.64	0.674393	1	20	12	21924.8	0.129191	0.756183	19	13.6167	18984.1	8428.39	0.443972	32789	16044	18853	31295	9451	8793	14054	8164	24582	23714	21442	17961	15486	11976	27597	20238	18902.4
unknown1425	0.0419656	0.277096	18	15	2234.81	0.999056	1	20	12	4807.25	0.174909	0.841424	19	13.6167	3758.1	2159.84	0.574715	7496	5393	5689	2277	2471	2243	2401	1692	3910	6375	5742	3202	2577	1618	4127	2582	3737.19
unknown1489	0.0419656	0.277096	18	6	6064.15	0.998307	1	28	6	12799.8	0.174809	0.841424	23	6.29762	8672.4	1909.27	0.220155	3318	1882	2803	1303	12637	10062	15611	12889	2279	2566	2300	2484	22405	19807	12491	12869	8606.62
unknown1508	0.0419656	0.277096	18	15	2283.6	0.526733	1	20	12	7832.25	0.106367	0.710696	19	13.6167	5954.55	2579.81	0.433251	9674	4624	5872	3965	3154	3623	4872	3236	7585	9118	7477	7149	5134	3906	10206	5278	5929.56
unknown1509	0.0419656	0.277096	18	15	60078.1	0.121272	1	20	12	112893	0.0319637	0.517839	19	13.6167	80796	53135.9	0.657655	124892	32921	56583	137426	16342	23843	27006	31919	134102	111124	93388	112957	93099	77483	113300	98119	80281.5
unknown1517	0.0419656	0.277096	24	18	895.197	0.50527	1	25.1282	17.9999	2505.74	0.102915	0.704773	24.5641	18.0095	1536.82	859.618	0.55935	1067	400	3626	363	315	288	1694	408	2136	956	1211	1863	1739	2912	2092	3280	1521.88
unknown1537	0.0419656	0.277096	24	21	1062.78	0.253007	1	22.5575	17.9999	7069.24	0.0588771	0.621344	23.2788	19.4722	5416.12	1261.9	0.232989	5994	3139	7122	5530	2956	2580	5526	3098	5980	4919	5346	6835	5409	6415	6856	9597	5456.38
unknown1549	0.0419656	0.277096	24	18	531.744	0.659676	1	21.3559	17.9999	3214	0.126983	0.756183	22.678	18.0613	2608.22	678.839	0.260269	4759	2320	2474	1698	1660	1964	1989	1811	2895	3035	2528	2283	4083	2350	3706	2717	2642
unknown1614	0.0419656	0.277096	24	18	2791.66	0.719793	1	25.2722	17.9999	9375.98	0.13592	0.756183	24.6361	18.012	5911.45	3358.37	0.568112	3618	1334	15437	3118	1174	933	8508	1771	6817	3219	4171	5934	7736	9793	8256	11719	5846.12
unknown1622	0.0419656	0.277096	24	18	1246.63	0.800298	1	27.8233	17.9999	5567.99	0.147562	0.785013	25.9117	18.0985	4020.96	1041.79	0.259091	2899	2225	6091	1892	1746	1802	6129	2044	5971	3383	3396	3631	4070	3736	7865	6601	3967.56
unknown1628	0.0419656	0.277096	18	15	2064.04	0.619953	1	20	12	8703	0.120952	0.754271	19	13.6167	7553.18	2348.54	0.310933	11049	6369	9083	8180	5240	5503	6497	4117	8249	9761	9030	7772	7789	5752	9432	6664	7530.44
unknown1672	0.0419656	0.277096	24	18	2137.94	0.856598	1	24.4321	17.9999	8152.23	0.155498	0.807624	24.2161	18.0014	5121.87	3463.84	0.676284	3077	957	16749	2593	667	498	6202	2080	4894	2214	3778	5249	6468	7664	5811	12666	5097.94
unknown1709	0.0419656	0.277096	24	18	6053.54	0.253063	1	22.7907	17.9999	19062.5	0.0588877	0.621344	23.3953	18.012	11329.3	6870.09	0.606397	12133	1801	16997	10545	847	1149	7366	1750	16927	7013	10320	20492	9399	18700	15248	32903	11474.4
unknown206	0.0419656	0.277096	24	21	5095.77	0.257579	1	26.3284	17.9999	35413.9	0.0597474	0.621344	25.1642	19.6113	27158.4	6080.22	0.22388	35238	23613	28863	16535	19446	20706	23203	23632	26805	22394	25840	22044	36660	25394	41748	37854	26873.4
unknown417	0.0419656	0.277096	24	18	3350.45	0.425297	1	21.5648	17.9999	8147.99	0.0897009	0.671246	22.7824	18.0515	5395.77	2384.13	0.441851	7307	1447	9400	2091	1209	1428	3001	2037	11300	6257	2213	7780	4562	6316	9726	11988	5503.88
unknown519	0.0419656	0.277096	24	18	1673.19	0.403429	1	26.6465	17.9999	7498.98	0.0859824	0.671246	25.3233	18.0493	4979.82	2046.3	0.410918	3484	2703	8295	3633	2019	2038	6234	3118	5823	2745	3685	4671	6089	6784	7025	10098	4902.75
unknown533	0.0419656	0.277096	24	18	7226.45	0.307717	1	27.8233	17.9999	25184.2	0.0690807	0.65697	25.9117	18.0985	15546	6741.55	0.433652	11263	6556	26757	3332	5942	5694	18934	7540	21665	10353	10086	14348	21869	25371	23624	29873	15200.4
unknown559	0.0419656	0.277096	18	15	2324.97	0.731596	1	20	12	7314.75	0.13765	0.759272	19	13.6167	5756.34	2565.19	0.445629	9796	4601	6236	5080	2836	2971	3898	4117	7438	8339	7453	6029	5138	2934	10015	4823	5731.5
unknown562	0.0419656	0.277096	18	3	1578.79	0.375401	1	25.8651	6.63e-05	19985.5	0.0811432	0.671246	21.9326	1.82774	19280.3	6549.22	0.339684	27274	17274	21513	13881	17273	19197	15395	16231	15422	14784	19955	11623	30982	19686	25492	27199	19573.8
unknown573	0.0419656	0.277096	18	3	936.916	0.161867	1	24.2975	6.63e-05	9150.23	0.040702	0.547161	21.1488	1.76243	7684.49	2847.53	0.370556	11394	8951	11401	4855	5558	6573	7297	5532	4355	5318	7556	6319	9890	9101	11544	10603	7890.44
unknown581	0.0419656	0.277096	24	18	97168.8	0.297889	1	26.9725	17.9999	342700	0.0672801	0.65697	25.4862	18.0614	192761	114016	0.59149	104617	50783	356705	110316	37146	35263	261965	61848	249280	92401	105836	171324	246187	382105	307857	434654	188018
unknown583	0.0419656	0.277096	18	3	8114.76	0.115484	1	24.2975	6.63e-05	69838.4	0.0306751	0.517839	21.1488	1.76243	57858.9	22426.1	0.387599	83699	69528	86291	39836	41177	47476	55408	41889	31973	40340	56492	45623	73472	69846	88636	80008	59480.9
unknown590	0.0419656	0.277096	24	18	4845.45	0.245396	1	26.6465	17.9999	17902	0.0574205	0.620953	25.3233	18.0493	12898.7	3291.89	0.255211	17093	7433	11200	5141	8378	9280	9993	7724	16169	15993	9981	14403	22223	10047	20018	19320	12774.8
unknown60	0.0419656	0.277096	24	18	15934.5	0.342191	1	26.6465	17.9999	62564.4	0.075295	0.65697	25.3233	18.0493	43920.8	13910.1	0.316708	67317	25843	44375	9451	27498	30718	31333	28323	53356	49049	37529	39301	75298	38024	68789	68147	43396.9
unknown687	0.0419656	0.277096	24	18	25875.2	0.351217	1	26.4865	17.9999	109460	0.0768973	0.65697	25.2432	18.0437	68851.7	33527.5	0.486953	53583	23531	120592	44261	17152	17923	84621	40865	80717	37676	51668	72059	88672	101350	96816	151003	67655.6
unknown739	0.0419656	0.277096	24	18	3337.9	0.58873	1	26.3284	17.9999	11942.2	0.116137	0.744938	25.1642	18.0386	7773.67	3463.9	0.445594	5089	3996	16523	1899	3359	3062	7514	4871	10017	4533	5802	8078	9578	10423	10783	16985	7657
unknown747	0.0419656	0.277096	18	15	41136.3	0.418658	1	20	12	102932	0.0885771	0.671246	19	13.6167	79459.5	43130.6	0.5428	129875	81234	125631	38309	34896	26212	48864	39806	111745	122452	86560	90970	68235	61420	114586	83874	79041.8
unknown765	0.0419656	0.277096	24	18	5538.41	0.361747	1	22.5575	17.9999	18278.2	0.0787544	0.663364	23.2788	18.0173	13964	3413.2	0.244428	20257	8826	16883	5104	8614	10273	9389	7879	18303	17492	12093	16591	21310	10912	21271	19620	14051.1
unknown767	0.0419656	0.277096	24	21	14717.2	0.244227	1	26.8085	17.9999	81550.6	0.0571958	0.620953	25.4043	19.6429	56327.3	17919.8	0.318137	80409	41389	58982	27564	38974	40309	41118	45886	52386	40886	52365	38764	91357	53149	96937	84760	55327.2
unknown867	0.0419656	0.277096	18	15	8726.76	0.395613	1	20	12	21303	0.0846414	0.671246	19	13.6167	16449.4	8655.7	0.526202	23843	14859	27084	8426	6014	4711	11262	7934	25145	24620	16179	19268	13952	13449	29001	16102	16365.6
unknown877	0.0419656	0.277096	18	3	368.756	0.509543	1	26.1721	6.63e-05	3076	0.103605	0.704773	22.0861	1.84053	3003.31	1164.79	0.387836	3714	3705	3451	1434	1841	2862	2811	2730	2201	2413	2847	1937	5689	2871	4634	3660	3050
unknown901	0.0419656	0.277096	18	15	3897.93	0.644791	1	20	12	10247.2	0.124735	0.756183	19	13.6167	7828.22	4037.01	0.5157	13757	8725	10657	3245	3517	3559	6216	4184	11810	10453	9028	9698	7448	6073	9916	6340	7789.12
unknown924	0.0419656	0.277096	18	15	726.729	0.502595	1	20	12	6335	0.102482	0.704773	19	13.6167	5263.76	1078.95	0.204977	5377	6102	5552	3351	4607	4543	4728	5365	6470	6373	6808	5689	4408	4143	5404	5133	5253.31
unknown93	0.0419656	0.277096	24	18	20176.9	0.310554	1	27.1385	17.9999	67347.8	0.0695979	0.65697	25.5692	18.068	38943.1	21651	0.555966	21444	10348	68950	23534	7130	6540	56438	11812	52932	19006	22226	38250	51847	70656	65220	81669	38000.1
unknown971	0.0419656	0.277096	24	18	2661.9	0.383441	1	21.4599	17.9999	9375.75	0.0825401	0.671246	22.7299	18.0563	7421.56	1587.73	0.213935	10939	5975	9162	1862	4921	4690	5377	4473	9899	9628	7956	7568	10112	6374	10092	10925	7497.06
unknown991	0.0419656	0.277096	24	18	2198.04	0.303629	1	26.1721	17.9999	11049.5	0.0683333	0.65697	25.0861	18.0338	7281.79	3169.8	0.435305	6111	5293	11567	3255	3393	3852	4748	5998	4628	7799	7619	6441	16019	6250	10553	11376	7181.38
unknown1065	0.0499351	0.298155	24	18	303.349	0.619754	1	26.0177	17.9999	1136.25	0.138504	0.759536	25.0088	18.0293	508.571	554.4	1.09011	0	0	1881	0	0	0	362	0	545	51	61	429	374	1538	794	1839	492.125

## Sheet: uni cycling proteinAS in protAM
CycID	JTK_pvalue	JTK_BH.Q	JTK_period	JTK_adjphase	JTK_amplitude	LS_pvalue	LS_BH.Q	LS_period	LS_adjphase	LS_amplitude	meta2d_pvalue	meta2d_BH.Q	meta2d_period	meta2d_phase	meta2d_Base	meta2d_AMP	meta2d_rAMP	0	0.1	0.2	0.3	6	6.1	6.2	6.3	12	12.1	12.2	12.3	18	18.1	18.2	18.3	ProteinM
Cer 37:1;4O|Cer 22:0;3O/15:1;(2OH)	0.0579045	0.294775	18	15	7833.33	0.999939	1	20	12	19991.5	0.222862	1	19	13.6167	13916.4	10473.8	0.752621	23885	21001	17164	19466	6796	6895	6025	12868	15110	21441	32326	11089	7587	4948	4024	10415	13815
Cer 37:2;3O	0.0579045	0.294775	18	15	17553.9	0.999613	1	20	12	38135.2	0.222808	1	19	13.6167	24735.4	22439	0.907163	46259	35780	33342	35746	10938	9956	8282	20436	29315	40990	61720	20516	10195	7617	4848	16349	24518.1
Cer 39:2;3O	0.0579045	0.294775	18	15	8030.61	0.985633	1	20	12	19584.2	0.220496	1	19	13.6167	10856.2	12715.9	1.1713	19542	14831	14264	15384	3044	3337	2377	7593	12612	19314	37124	9287	3274	2073	1493	6180	10733.1
Cer 39:2;3O|Cer 16:2;2O/23:0;(2OH)	0.0579045	0.294775	18	15	7171.48	0.988159	1	20	12	17051.2	0.220915	1	19	13.6167	9597.27	11051.4	1.15151	16962	12952	13065	14454	2956	2951	2178	6792	11538	17766	30789	8112	2773	1892	1328	5336	9490.25
LPC 12:0/0:0	0.0579045	0.294775	24	12	13943.8	0.195599	1	20	12	81021.5	0.0620742	0.583082	22	12.1	35662.3	43500.4	1.21979	13453	8158	6255	11499	28089	9177	7149	27739	20645	97192	139638	66611	7079	6376	17199	63278	33096.1
PE P-36:1 or PE O-36:2	0.0579045	0.294775	18	15	26479.4	0.858306	1	20	12	82412	0.198886	0.990139	19	13.6167	45341.6	45504.2	1.00359	70165	37485	47846	59506	20791	20384	21227	33753	58033	98342	141740	31533	14814	15882	11934	34980	44900.9
PE P-36:2 or PE O-36:3	0.0579045	0.294775	18	15	7561.27	0.837556	1	20	12	22766.8	0.195265	0.980694	19	13.6167	12811.9	12227.2	0.954359	18989	10588	13098	17368	6069	6134	6023	9780	16828	27136	37996	9107	5620	4460	3616	10284	12693.5
unknown1065	0.0579045	0.294775	24	15	106.773	0.888998	1	24.5682	12	358.25	0.20419	1	24.2841	13.5194	184.428	148.149	0.80329	0	0	0	0	0	0	0	148	151	197	584	501	0	0	60	1322	185.188
unknown1269	0.0579045	0.294775	18	15	35201	0.939986	1	20	12	99887.2	0.212865	1	19	13.6167	55977.6	57103.5	1.02011	92867	45327	72639	71799	21804	24178	14084	50049	75668	121675	171058	31148	13881	11197	18772	50647	55424.6
unknown1322	0.0579045	0.294775	18	15	29025.8	0.999803	1	20	12	84899	0.22284	1	19	13.6167	62696.3	39083.9	0.623384	102926	88973	73625	80471	33281	39643	27920	57667	68031	96158	125359	50048	43829	27722	20643	60789	62317.8
unknown1341	0.0579045	0.294775	18	15	3971.47	0.974069	1	20	12	10175.8	0.218575	1	19	13.6167	6221.95	5435.43	0.873589	9693	6537	6389	9441	2383	2758	3367	5135	8442	13508	15902	2851	3058	2545	1891	4809	6169.31
unknown1360	0.0579045	0.294775	18	15	159874	0.971969	1	20	12	493848	0.218225	1	19	13.6167	311393	244431	0.784959	500310	405615	266798	361492	173703	163608	134281	275329	214029	548246	846376	366742	210524	91834	114213	271317	309026
unknown1374	0.0579045	0.294775	24	15	887.242	0.616552	1	22.5575	12	2648.5	0.154678	0.865457	23.2788	13.4665	1523.52	1264.05	0.829688	735	377	356	709	1516	461	492	1567	1757	2983	3876	1978	703	380	1003	5241	1508.38
unknown1555	0.0579045	0.294775	18	15	12253.5	0.990673	1	20	12	30623.2	0.221331	1	19	13.6167	18574.9	18191.8	0.979379	31673	26653	23434	25423	8180	8201	5466	13321	22476	31796	51819	16402	7392	5450	3404	13289	18398.7
unknown1662	0.0579045	0.294775	18	15	20764.2	0.972732	1	20	12	47296.2	0.218352	1	19	13.6167	24618.5	31530.2	1.28075	45567	34299	24729	35569	5569	6938	3456	14798	30304	65631	86352	6898	9094	4057	2273	13477	24313.2
unknown1710	0.0579045	0.294775	18	15	10645.1	0.579689	1	20	12	86439.8	0.147499	0.842584	19	13.6167	42355	43581.5	1.02896	43469	32692	25143	32467	22308	29827	13064	29304	30496	96042	174601	44620	24532	9081	18334	44947	41932.9
unknown198	0.0579045	0.294775	18	6	2193.45	0.995522	1	20	6	5686.25	0.222133	1	19	6.01667	3972.75	2116.17	0.532671	2379	1371	1343	2002	4984	4485	6208	7068	2062	3658	4437	728	3042	4050	3189	8455	3716.31
unknown696	0.0579045	0.294775	18	15	4577.28	0.807994	1	20	12	16184.5	0.190054	0.960973	19	13.6167	8499.63	9190.66	1.0813	13861	7852	7994	9296	2844	2416	3216	8202	11457	21690	26673	4918	2524	2299	2479	6849	8410.62
unknown829	0.0579045	0.294775	18	15	25395	0.945679	1	20	12	73583	0.213824	1	19	13.6167	43861.1	39061.6	0.890575	69519	41564	47910	60246	21789	21498	19108	36293	56901	93672	116293	27466	16759	16381	10634	39692	43482.8
unknown887	0.0579045	0.294775	18	6	1789.51	0.995066	1	20	6.00001	5356.75	0.222058	1	19	6.01667	4035.96	1628.92	0.403601	3019	1970	1894	2461	5263	4053	5869	6242	2205	3629	4361	1769	3303	4311	3993	7075	3838.56
unknown889	0.0579045	0.294775	24	15	2407.35	0.206837	1	20	12	12944.5	0.0649715	0.598523	22	13.475	5797	9262.98	1.59789	3102	2043	1400	2873	3319	2476	1528	5410	5813	16047	23082	6836	2033	1563	3327	7914	5547.88
unknown977	0.0579045	0.294775	24	12	20967.5	0.186421	1	20	12	232902	0.0596803	0.570138	22	12.1	84670.4	142741	1.68585	18852	10216	6837	15163	30987	12421	7341	41748	39649	289457	442069	160431	9777	7104	24432	103507	76249.4
Cer 30:2;2O|Cer 16:2;2O/14:0	0.0787266	0.33665	18	15	2134.05	0.999974	1	20	12	7124.75	0.278827	1	19	13.6167	5041.07	3188.68	0.63254	9612	6786	5469	5214	2109	1982	2471	7808	7544	7161	9569	4225	2536	2247	1568	3862	5010.19
Cer 37:2;3O|Cer 15:2;2O/22:0;O	0.0787266	0.33665	18	15	11923.8	0.918164	1	20	12	34658.5	0.262185	1	19	13.6167	19522.3	19168.5	0.981874	30187	16689	21530	27769	7702	8556	9125	16582	25961	41059	58953	12661	5671	6183	4587	16172	19336.7
Cer 37:2;3O|Cer 16:2;2O/21:0;(2OH)	0.0787266	0.33665	18	15	16355	0.999138	1	20	12	39594.2	0.278659	1	19	13.6167	25459.4	22999.7	0.90339	43959	36352	34413	38445	11293	10916	8968	21587	32107	41643	61760	22867	9718	7397	5274	17087	25236.6
LPC 14:0	0.0787266	0.33665	24	12	17164.5	0.154372	1	20	12	104966	0.0657505	0.598523	22	12.1	46794.2	55052.2	1.17648	21976	13881	9231	14907	27478	12810	9548	40050	35625	116249	175382	92606	10826	9425	24087	82661	43546.4
LPC 17:1	0.0787266	0.33665	24	15	1788.27	0.156001	1	20	12	5881.25	0.0663157	0.598523	22	13.475	3064.14	3467.83	1.13175	1975	1060	897	1590	2257	1078	967	3097	3854	6079	8632	4960	1355	844	2406	6483	2970.88
LPI 18:0	0.0787266	0.33665	18	6	3482.5	0.872953	1	20	6	7731.5	0.252745	1	19	6.01667	5186.87	3114.1	0.600381	2947	2284	1381	2094	8703	7089	6205	8929	1824	6465	8669	239	4854	4218	3137	7914	4809.5
PE-Cer 35:2;3O|PE-Cer 17:0;2O/18:2;O	0.0787266	0.33665	18	15	2460.38	0.999757	1	20	12	8694.5	0.278783	1	19	13.6167	6350.3	3786.8	0.596319	9513	9312	7105	7705	4326	3867	2842	6202	7673	8159	13483	5463	3793	2853	2069	6653	6313.62
PI O-34:1|PI O-18:0_16:1	0.0787266	0.33665	18	15	7942.93	0.999371	1	20	12	16305.5	0.278706	1	19	13.6167	10128.9	10076	0.994782	19710	16673	10395	14831	3632	3840	2253	7504	11329	21306	29091	3496	5287	2711	1196	7247	10031.3
unknown1019	0.0787266	0.33665	18	15	51668.1	0.942686	1	20	12	148548	0.267231	1	19	13.6167	89660.5	77138.7	0.860342	140861	82657	101054	119849	44532	46606	37993	79045	119618	186149	230089	58338	36578	32595	22789	83862	88913.4
unknown1094	0.0787266	0.33665	18	15	5043.09	0.913453	1	20	12	14997	0.26121	1	19	13.6167	8609.2	8107.12	0.941681	12830	7074	10979	10769	3552	4120	3182	7658	11783	17371	25577	5257	2896	1915	3107	8421	8530.69
unknown1126	0.0787266	0.33665	18	15	8356.76	0.825413	1	20	12	30932.5	0.24262	1	19	13.6167	16497.5	16816.6	1.01935	29725	10711	11724	18298	7876	6648	7598	10441	13145	42175	54330	14080	5676	3781	5518	19628	16334.6
unknown1162	0.0787266	0.33665	18	15	7869.74	0.755335	1	20	12	31182	0.227297	1	19	13.6167	17287.2	15667.1	0.90628	21505	12074	17703	17029	5809	10139	6313	14378	19742	34861	58456	11669	7076	3806	9360	24248	17135.5
unknown1303	0.0787266	0.33665	18	6	3126.12	0.983184	1	28	6	6708	0.275456	1	23	6.29762	4446.12	709.034	0.159473	25	73	12	70	8471	6513	7407	4441	55	50	29	23	9633	6743	9662	17540	4421.69
unknown1320	0.0787266	0.33665	18	12	13759.9	0.35122	1	20	12	77903.8	0.126863	0.784595	19	12.0333	41696.4	37676.5	0.90359	39690	18285	17656	30523	22689	17865	21838	27334	37220	106124	128687	39584	13835	11413	10302	52884	37245.6
unknown1325	0.0787266	0.33665	18	6	1717.39	0.9997	1	20	6.00001	5539.25	0.278772	1	19	6.01667	4231.86	1673.49	0.39545	2561	2444	1692	2489	5589	4310	5144	7114	2709	3121	4053	1942	4450	5152	4366	7329	4029.06
unknown1363	0.0787266	0.33665	18	15	5225.87	0.999483	1	20	12	15411.8	0.278728	1	19	13.6167	10235.5	7303.73	0.71357	17045	9154	14676	12987	7486	6400	1563	12850	17188	17734	21002	5723	406	3254	4129	11039	10164.8
unknown1367	0.0787266	0.33665	18	3	616.067	0.865177	1	20	6.00001	5354.5	0.251103	1	19	4.43334	5164.8	830.283	0.160758	5361	5905	4308	4513	4897	5748	5205	5568	4452	3694	4259	4685	6948	5402	5172	6343	5153.75
unknown1426	0.0787266	0.33665	18	15	5718.2	0.968972	1	20	12	17744.5	0.272585	1	19	13.6167	11254.3	8741.74	0.776744	19221	14280	9004	12522	6112	5877	4731	9746	8073	19044	30551	13310	8512	3438	3948	10346	11169.7
unknown1450	0.0787266	0.33665	18	15	12080.2	0.915645	1	20	12	43629	0.261664	1	19	13.6167	24059.9	23521.1	0.977605	35154	27956	15889	29842	11393	10107	10087	19099	13554	46836	87034	27092	14868	5378	6951	20074	23832.1
unknown1489	0.0787266	0.33665	18	6	5122.99	0.999802	1	20	6	10215.2	0.278792	1	19	6.01667	7177.13	3921.4	0.546374	2736	2590	1834	2054	11206	9281	10168	10206	2068	2584	3475	2168	11792	8216	10612	16241	6701.94
unknown1509	0.0787266	0.33665	18	15	17720.8	0.298839	1	20	12	155826	0.111742	0.725958	19	13.6167	60878.4	88737.1	1.45761	39224	22953	23364	39612	22471	27802	14357	24832	38288	204455	296902	83661	21487	9468	22452	68976	60019
unknown1712	0.0787266	0.33665	24	15	322.087	0.230562	1	20	12	5965.75	0.0909204	0.675882	22	13.475	1785.8	5511.74	3.08643	14	0	0	23	67	0	0	457	444	7996	12115	3308	0	0	120	1657	1637.56
unknown457	0.0787266	0.33665	18	15	1969.65	0.817067	1	20	12	7739.5	0.24082	1	19	13.6167	4912.3	3270.51	0.665781	6248	3769	4705	5955	2890	3086	2942	4615	5943	9436	12259	3320	3059	2450	2210	5203	4880.62
unknown613	0.0787266	0.33665	18	15	7492.5	0.925782	1	20	12	26104.8	0.263758	1	19	13.6167	17071.6	11610.8	0.680127	23990	15193	18047	22202	10073	10200	8947	16053	22066	31813	38864	11676	9106	8550	7113	17453	16959.1
unknown647	0.0787266	0.33665	24	15	30142.9	0.17862	1	20	12	145152	0.074027	0.598523	22	13.475	62032.4	106784	1.72143	25053	19819	11403	24857	36431	18654	12012	56252	61865	171898	260745	86100	15779	12653	39619	93428	59160.5
unknown685	0.0787266	0.33665	18	15	4497.91	0.969456	1	20	12	14943.5	0.272683	1	19	13.6167	10001.6	6667.32	0.666623	14179	9310	11432	13832	5900	6638	5701	8836	13182	16996	21729	7867	5372	4532	3002	10485	9937.06
unknown734	0.0787266	0.33665	24	15	3296.18	0.175621	1	20	12	13250.8	0.0730182	0.598523	22	13.475	6473.29	8534.99	1.31849	3681	2491	1753	2942	4694	1938	2423	6563	7344	14743	22102	8814	2523	1835	4562	11492	6243.75
unknown747	0.0787266	0.33665	18	15	72425.6	0.853713	1	20	12	266884	0.248672	1	19	13.6167	152932	134703	0.880805	222101	119970	148812	186178	71734	82790	67988	139198	183584	345537	448065	90348	69029	60373	44896	145438	151628
LPC 20:1	0.105571	0.39501	24	15	268.701	0.397064	1	20	12	1485.75	0.174885	0.901267	22	13.475	807.356	835.909	1.03537	315	324	487	437	612	520	169	927	802	1879	2500	762	431	188	578	1627	784.875
LPC 20:5	0.105571	0.39501	18	12	290.974	0.161162	1	20	12	1060.75	0.0863241	0.654722	19	12.0333	479.465	593.314	1.23745	245	0	199	90	296	13	213	411	255	1724	1406	858	59	86	179	516	409.375
unknown1098	0.105571	0.39501	24	15	2887.12	0.954753	1	28	17.9999	9117.24	0.332083	1	26	16.4821	4423.86	2264.99	0.511995	445	150	0	371	1863	164	59	4691	2226	5661	11477	6437	183	103	3321	32862	4375.81
unknown1161	0.105571	0.39501	18	15	3423.46	0.899475	1	20	12	14217.8	0.31852	1	19	13.6167	8220.95	7042.25	0.856623	11596	6695	8381	9468	4178	3539	4403	7902	9099	17367	25677	4728	3420	3027	2585	8379	8152.75
unknown1197	0.105571	0.39501	18	6	3811.48	0.993037	1	28	6	7429	0.341278	1	23	6.29762	4871.33	869.577	0.178509	43	75	50	98	9304	6924	8056	5432	81	44	124	69	9205	6920	9772	21265	4841.38
unknown1255	0.105571	0.39501	24	15	1605.84	0.623235	1	21.8859	12	12915.8	0.244838	1	22.9429	13.4595	7933.89	5908.34	0.744696	3673	3380	3312	5336	5825	4876	7126	6944	4624	16509	24975	5555	7895	5403	5611	14304	7834.25
unknown1315	0.105571	0.39501	24	15	1298.96	0.129872	1	20	12	7166.75	0.0725236	0.598523	22	13.475	3214.32	5045.61	1.56973	1293	1357	609	1256	2768	1049	658	2883	1939	7347	10851	8530	1262	749	1990	4717	3078.62
unknown1480	0.105571	0.39501	18	15	9789.89	0.999903	1	20	12	32106.5	0.34291	1	19	13.6167	22821.9	13353.1	0.585099	36182	21096	30432	29547	16613	16006	7987	28517	34695	37188	42616	13927	3388	9066	10679	25143	22692.6
unknown519	0.105571	0.39501	24	15	1883.03	0.598467	1	23.52	12	6057	0.23767	1	23.76	13.4862	4144.19	2022.56	0.488048	3136	1986	1593	2548	3212	2385	1981	5008	5871	6164	8088	4105	2176	2104	4946	10869	4135.75
unknown541	0.105571	0.39501	18	12	3851.26	0.550845	1	20	12	35531.5	0.22358	1	19	12.0333	18877.4	16974.1	0.899176	16267	6379	6899	11812	10296	7947	10853	12853	11337	44756	71589	14444	6247	6401	6257	25618	16872.2
unknown715	0.105571	0.39501	18	15	8616.8	0.88686	1	20	12	32212.5	0.315375	1	19	13.6167	18747	15970.8	0.851912	26737	15190	17396	24608	9892	9766	10915	15720	22460	38073	56532	11785	7205	8870	5092	17237	18592.4
unknown837	0.105571	0.39501	18	9	1618.21	0.976818	1	27.1385	6.00001	4002.75	0.337402	1	22.5692	8.13721	2873.32	908.718	0.316261	1743	993	1168	1699	4148	2797	4326	4740	1408	3841	4340	1634	2007	2199	1998	5990	2814.44
unknown867	0.105571	0.39501	18	15	15080.1	0.845372	1	20	12	54330.8	0.304898	1	19	13.6167	30344.1	28204.9	0.929502	50274	22449	24647	34266	13570	15020	12490	25222	34770	73971	91180	17402	12779	12842	5800	34453	30070.9
unknown93	0.105571	0.39501	24	15	18873	0.331976	1	21.995	12	54037.8	0.152491	0.858003	22.9975	13.4602	28593.3	30628.7	1.07118	11796	6448	3323	8693	29082	6967	5534	45634	29905	55881	82464	47901	8054	5077	31484	71356	28099.9
Cer 35:2;3O|Cer 16:2;3O/19:0	0.122638	0.455211	18	15	6964.47	0.999852	1	28	12	18881.2	0.379959	1	23	14.5119	13801.6	13772.9	0.997918	22753	20291	18620	20336	8088	8126	6374	13387	15785	20336	27110	12294	6637	5446	3778	10798	13759.9
CAR 14:0	0.139706	0.455211	24	15	9301.28	0.358672	1	20	12	74302.8	0.200112	0.990139	22	13.475	35641.2	50443.8	1.41532	17423	20332	12976	20899	16052	16860	11262	39529	27786	93057	143543	32825	20072	20746	19530	35661	34284.6
CL 72:8|CL 18:2_18:2_18:2_18:2	0.139706	0.455211	18	15	4000.1	0.999914	1	20	12	11448.8	0.414655	1	19	13.6167	7635.04	6077.09	0.795948	16887	7727	9325	9556	3763	4184	3745	5962	8955	13075	19884	3881	2869	2865	2296	6245	7576.19
CL 72:9|CL 18:2_18:2_18:2_18:3	0.139706	0.455211	18	15	265.165	0.999849	1	20	12	687.75	0.414637	1	19	13.6167	462.228	359.096	0.776882	958	540	493	613	195	271	195	416	503	915	1072	261	130	192	109	477	458.75
Cer 40:2;3O|Cer 16:2;2O/24:0;(2OH)	0.139706	0.455211	18	15	3807.24	0.999863	1	20	12	10461.8	0.41464	1	19	13.6167	7087.86	5426.25	0.76557	12364	8946	9003	10182	3847	3630	3126	6601	8572	10920	17326	5029	3147	2621	1917	5334	7035.31
LPC 16:1	0.139706	0.455211	24	15	432742	0.68654	1	23.7736	12	1067283	0.320765	1	23.8868	13.4932	606066	501908	0.828141	225053	133961	81570	166988	524718	143699	115365	871310	527474	1123283	1710734	907641	156370	107682	621806	2263435	605068
LPC 18:1	0.139706	0.455211	24	15	147223	0.220157	1	20	12	943483	0.137843	0.801704	22	13.475	357689	745583	2.08444	85238	44699	27818	78395	121140	39854	27039	229827	210414	1163411	1794326	605780	45293	26729	181879	720355	337637
NAGly 14:1	0.139706	0.455211	24	3	1378.5	0.290371	1	28	6.63e-05	7503.47	0.170575	0.901267	26	1.62503	3607.86	111.367	0.0308678	13201	6243	5167	5403	2458	2986	2694	2695	3050	2100	3401	1049	1967	1219	822	3237	3605.75
TG 35:0|TG 11:0_12:0_12:0	0.139706	0.455211	18	15	7501.7	0.990497	1	20	12	24328.5	0.412059	1	19	13.6167	15036.4	12052.6	0.801566	25646	11414	20142	17909	7636	7335	5290	19114	19776	32424	37022	8092	3302	3628	5717	14267	14919.6
unknown1072	0.139706	0.455211	24	15	945.755	0.181212	1	20	12	6974.25	0.118387	0.754175	22	13.475	2669.94	5637.89	2.11162	1014	617	559	896	867	876	258	1730	1919	8149	13114	4715	801	186	1369	3223	2518.31
unknown1247	0.139706	0.455211	18	12	1272.09	0.313838	1	20	12	8117.75	0.180953	0.925374	19	12.0333	3067.89	5123.58	1.67007	325	179	58	616	553	161	104	1703	1517	9914	17796	3244	0	79	533	2620	2462.62
unknown1280	0.139706	0.455211	24	15	1919.09	0.327583	1	28	6.00002	7547	0.186916	0.947239	26	10.9107	7369.03	422.091	0.057279	4672	5079	3968	4357	8892	6443	6351	8502	5496	6492	9116	6665	10889	9082	9508	11847	7334.94
unknown1372	0.139706	0.455211	18	15	9324.44	0.999969	1	28	12	22005.2	0.414669	1	23	14.5119	15564.9	17638.6	1.13323	27254	23875	21210	23633	7922	7918	6446	13620	19157	22988	31804	14072	6846	5552	4357	11530	15511.5
unknown1486	0.139706	0.455211	24	15	9031.52	0.158895	1	20	12	39521.5	0.106725	0.702632	22	13.475	18051.2	27093.4	1.50092	7312	7366	3240	6182	16488	5893	3351	17086	10678	39743	61355	46310	7108	3308	11321	30420	17322.6
unknown1501	0.139706	0.455211	24	15	969.797	0.630297	1	21.0501	12	7699	0.302014	1	22.5251	13.4595	4621.42	3701.24	0.800889	2175	1847	2095	3382	2746	3255	4038	3883	3258	8819	15712	3007	4259	3379	3179	7601	4539.69
unknown1537	0.139706	0.455211	24	12	1040.51	0.425842	1	20.464	12	5309.5	0.227376	1	22.232	12.0764	3714.19	1671.12	0.449927	3008	2931	1858	2312	4334	2925	1916	4719	2429	5840	7565	5404	3149	1873	3226	4516	3625.31
unknown1606	0.139706	0.455211	24	12	838.275	0.154183	1	20	12	5322.5	0.104208	0.691847	22	12.1	2065.64	3159.4	1.52951	476	359	106	346	1252	331	108	1572	1012	4960	9498	5820	284	105	820	3019	1879.25
unknown1709	0.139706	0.455211	24	15	2421.13	0.21298	1	20	12	13220.8	0.134335	0.787253	22	13.475	4848.11	10856.8	2.23939	1071	1100	250	790	2393	625	248	4214	3475	12382	27014	10012	596	266	2294	6168	4556.12
unknown583	0.139706	0.455211	18	15	23087.9	0.99987	1	28	12	141433	0.414642	1	23	14.5119	117285	50353.2	0.429324	148022	111462	141732	133802	115819	99399	75494	135895	159120	159858	156359	90396	55772	84523	78261	128205	117132
unknown702	0.139706	0.455211	18	15	3956.26	0.955556	1	20	12	11745.2	0.402317	1	19	13.6167	7425.25	5679.41	0.764878	10165	6592	8235	10811	3878	4282	3675	6381	10233	15299	17934	3515	3901	3529	2646	6848	7370.25
unknown901	0.139706	0.455211	18	15	6424.77	0.989129	1	20	12	21487.2	0.411681	1	19	13.6167	14168.3	9726.18	0.686473	21717	12553	16018	19750	8033	8459	8787	14338	19033	26373	31755	8788	5806	6359	4423	12994	14074.1
unknown980	0.139706	0.455211	18	15	3260.65	0.992405	1	20	12	13180.8	0.412586	1	19	13.6167	9341.17	4960.93	0.531082	13219	7734	11515	10855	6500	6847	4639	10743	14015	16359	17062	5287	3175	4539	5575	10626	9293.12
unknown1227	0.161148	0.523555	18	15	1122.36	0.938107	1	20	12	3210.25	0.43679	1	19	13.6167	2032.45	1472.65	0.724571	3478	1507	1622	2818	1070	1243	1507	1574	3169	3812	4699	1161	878	1122	768	1863	2018.19
Cer 40:2;3O	0.182589	0.535133	18	15	4798.96	0.999826	1	20	12	13392.5	0.49303	1	19	13.6167	8884.64	6972.13	0.78474	15153	11887	11027	12035	4195	4339	4210	8988	10076	14558	23316	5620	4130	2805	2177	6558	8817.12
LPC 18:2	0.182589	0.535133	24	15	73534	0.38718	1	20.6557	12	254592	0.257992	1	22.3279	13.4632	131854	147203	1.11641	72547	40776	28203	58184	82980	37351	29821	137182	144655	265603	401943	206169	35331	25291	97040	389732	128300
LPG 16:1	0.182589	0.535133	24	12	329.865	0.188657	1	20	12	2321.75	0.150475	0.857107	22	12.1	1056.07	1128.36	1.06845	591	552	135	424	218	315	194	830	943	2587	3893	1864	163	159	761	2203	989.5
unknown1345	0.182589	0.535133	18	15	2256.02	0.999846	1	20	12	7620.25	0.493037	1	19	13.6167	5645.92	3160.74	0.559828	9893	7071	6140	6137	3357	3566	3201	5571	6065	8849	11247	4320	3433	2786	1796	6413	5615.31
unknown1493	0.182589	0.535133	18	15	25391.5	0.999805	1	28	12	61316.8	0.493024	1	23	14.5119	45002	46209.2	1.02683	77912	70473	60815	64904	24808	25307	20046	41724	53868	63577	87757	40065	21155	17290	13217	34875	44862.1
unknown1617	0.182589	0.535133	18	15	2786.35	0.962555	1	20	12	8572.25	0.481328	1	19	13.6167	4937.26	4395.7	0.890312	6749	4291	4639	7043	2661	2935	1946	4194	7002	12859	14287	141	2089	2010	1363	4106	4894.69
unknown1628	0.182589	0.535133	18	15	1505.08	0.982014	1	20	12	9888.25	0.48747	1	19	13.6167	7149.32	3136.71	0.438743	9471	8575	5696	6780	5972	6440	5238	6453	6140	10845	15699	6869	6518	2697	2419	8091	7118.94
unknown529	0.182589	0.535133	24	15	8740.19	0.380816	1	21.253	12	25435.8	0.254904	1	22.6265	13.4585	13950.5	13543.3	0.970811	6710	4608	3996	6328	9922	5340	3294	16624	16763	23858	36062	25060	4960	2859	11799	40493	13667.2
unknown573	0.182589	0.535133	18	15	4080.71	0.999991	1	20	12	19665.2	0.493082	1	19	13.6167	15930.5	5246.75	0.329352	21692	14690	19163	18327	14418	13031	10597	17772	22927	22845	24344	8545	7412	10664	9747	17901	15879.7
unknown581	0.182589	0.535133	24	15	104005	0.673641	1	23.9024	12	256149	0.380754	1	23.9512	13.497	147400	119387	0.809954	57966	34996	20917	46883	132421	39116	30477	216641	131317	276033	397183	220063	41932	27059	155143	528603	147297
unknown590	0.182589	0.535133	24	15	1347.39	0.694079	1	22.5575	12	10200	0.388518	1	23.2788	13.4665	6794.93	3941.86	0.580118	3967	3205	2956	5103	4939	5245	5533	6639	4112	13868	18667	4153	7035	5575	4997	11969	6747.69
unknown60	0.182589	0.535133	18	9	7383.26	0.760781	1	24.5682	12	29702.2	0.413109	1	21.2841	10.519	21232.4	6645.25	0.312977	11199	9211	8440	13286	16668	19445	21584	21912	13440	37830	56308	11231	18477	12458	17666	38492	20477.9
unknown1266	0.209188	0.611492	18	15	254.912	0.283813	1	20.0911	12	1489.5	0.227029	1	19.0456	13.6234	558.569	812.949	1.45541	61	53	0	64	0	0	0	353	324	1683	2791	1160	0	0	406	1913	550.5
Cer 35:2;3O|Cer 17:1;2O/18:1;(3OH)	0.235786	0.616229	18	15	5992.02	0.999953	1	28	12	15159.8	0.576441	1	23	14.5119	11066.3	11128	1.00558	19604	16590	14587	15057	6003	6493	5285	10697	12400	14986	23742	9511	5083	4313	3262	8908	11032.6
FA 15:1	0.235786	0.616229	18	15	2172.59	0.853885	1	20	12	9831.25	0.524031	1	19	13.6167	6156.25	4401.2	0.714916	7460	5830	6072	6063	3406	2945	2428	5635	5151	10301	18418	5455	5440	2294	2639	8281	6113.62
LPC 20:2	0.235786	0.616229	18	12	863.377	0.512146	1	20.3695	12	2632.75	0.376034	1	19.1848	12.0459	1680.97	861.003	0.512205	1006	828	726	1334	1140	756	757	1772	1853	2890	3467	2321	625	414	1331	4083	1581.44
LPE O-22:0	0.235786	0.616229	18	15	2566.44	0.996163	1	28	12	5118.75	0.575149	1	23	14.5119	3850.73	4288.56	1.1137	7472	6850	5551	5901	1741	1926	1461	3047	5375	5126	6539	3435	1562	1700	838	2880	3837.75
NAPhe 14:1	0.235786	0.616229	18	0	36419.9	0.57584	1	28	12	59873.2	0.406885	1	23	4.92858	61943.1	49600.5	0.800744	189304	110130	83998	100743	31222	34618	39938	44147	55384	60076	82241	41792	35834	18482	20410	59133	62965.8
unknown1311	0.235786	0.616229	24	15	642.407	0.299596	1	28	6	2643.75	0.257849	1	26	10.9107	2575	109.086	0.0423637	1628	1827	1377	1551	3028	2293	2360	2894	1924	2286	3120	2531	3814	3268	3067	4091	2566.19
unknown1393	0.235786	0.616229	24	15	1397.95	0.80938	1	24.4321	12	3363	0.506934	1	24.2161	13.5145	2031.69	1271.74	0.625953	889	558	285	846	1216	372	245	2838	3178	3066	5543	1665	478	319	2548	8540	2036.62
unknown968	0.235786	0.616229	24	15	1012.58	0.820517	1	26.0177	12	2258.75	0.511265	1	25.0088	13.5826	1357.94	814.213	0.599595	566	235	197	208	1280	223	130	1611	1129	2166	4079	1661	297	0	2067	6123	1373.25
CL 72:10|CL 36:4_36:6	0.301037	0.716679	18	15	1194.66	0.99799	1	28	12	4393.75	0.661712	1	23	14.5119	3862.38	1943.21	0.503112	6064	4795	4828	4886	2745	3187	2669	3611	4425	4461	5845	2844	2843	2519	1858	4124	3856.5
CL 72:7|CL 18:1_18:2_18:2_18:2	0.301037	0.716679	18	15	502.046	0.999896	1	20	12	1724.75	0.662401	1	19	13.6167	1217.71	750.61	0.616412	2301	1219	1353	1426	741	817	747	1134	1351	2173	2717	658	510	558	398	1264	1210.44
PC 35:2 Isomer A	0.301037	0.716679	18	12	3098.54	0.72884	1	20	12	27582.8	0.552211	1	19	12.0333	23546.8	4763.34	0.202293	26972	17260	17602	23659	24179	23262	16693	29427	26297	27593	33590	22851	20832	16552	17297	23679	22984.1
unknown1309	0.301037	0.716679	18	15	5828.68	0.999997	1	20	12	24587.2	0.662438	1	19	13.6167	19302.1	7843.71	0.406366	26536	26582	19503	21127	12072	19798	15649	16481	34034	22645	32169	9501	14531	11914	5640	19436	19226.1
unknown1361	0.301037	0.716679	18	6	1143.04	0.817763	1	28	5.99999	3010	0.591244	1	23	6.29762	2672.33	144.549	0.054091	1404	873	711	805	3684	2744	3512	2100	856	1418	1895	511	4177	3949	5096	9102	2677.31
unknown1441	0.301037	0.716679	18	15	2575.46	0.953251	1	20	12	12974.2	0.645209	1	19	13.6167	8812.41	4818.49	0.546784	11755	6670	9047	9818	5895	6569	5438	8916	10280	15081	21510	5026	5596	3687	4911	10053	8765.75
unknown1585	0.301037	0.716679	18	0	2427.85	0.585857	1	28	12	4283	0.482393	1	23	4.92858	4841.56	2910.27	0.601101	12971	8396	5339	7157	3220	3230	2912	4614	5058	3570	5986	2518	3665	1763	1934	6092	4901.56
unknown1646	0.301037	0.716679	18	15	429.921	0.60596	1	20	12	3256	0.492792	1	19	13.6167	1598.42	1495.92	0.935871	1063	977	397	1219	969	487	257	1787	2091	1444	2317	7172	513	268	1449	2933	1583.94
unknown1659	0.301037	0.716679	18	15	7530.16	0.999996	1	28	12	28472.2	0.662437	1	23	14.5119	21969.5	16041.9	0.730187	38240	28712	22938	25874	15280	21703	13840	17648	23899	30212	45489	14289	13183	9251	5923	24254	21920.9
unknown533	0.301037	0.716679	24	12	4345.52	0.926749	1	28	17.9999	15802.7	0.635138	1	26	14.8571	12009.2	3229.88	0.26895	8077	5742	3626	6930	12518	6533	6733	17254	13573	13006	21374	14292	5601	4878	14069	38663	12054.3
unknown871	0.301037	0.716679	18	15	5076.32	0.895176	1	20	12	20381	0.62284	1	19	13.6167	12522.2	9284.77	0.741467	18130	10384	11687	14361	7264	7087	7100	11414	16050	24468	33930	7076	5286	5399	4699	14581	12432.2
CL 70:7|CL 16:1_18:2_18:2_18:2	0.380147	0.830994	18	15	16237.6	0.999999	1	28	12	49404	0.747824	1	23	14.5119	36882.8	32227.3	0.873776	71930	44010	44044	46058	18930	26790	20940	38276	39835	60661	81521	15599	15453	13598	10449	40469	36785.2
TG 34:0|TG 10:0_12:0_12:0	0.380147	0.830994	18	15	20524.7	0.999999	1	28	12	68035.2	0.747824	1	23	14.5119	49306	44476.4	0.902049	91584	36775	78738	62154	33088	33447	18049	60509	61210	84154	105549	21228	10083	15788	23887	50499	49171.4
unknown1090	0.380147	0.830994	24	12	318.552	0.260523	1	20	12	3177.75	0.328037	1	22	12.1	1707.07	1388.98	0.813665	1577	1185	504	952	973	837	924	1378	1283	3728	5333	2367	803	633	1289	2236	1625.12
unknown1141	0.380147	0.830994	24	15	2572.81	0.90212	1	28	17.9999	6152.75	0.709953	1	26	16.4821	3666.31	1225.66	0.334303	828	242	77	588	1871	381	192	5886	3998	5507	10220	3844	339	97	4022	20153	3640.31
unknown1181	0.380147	0.830994	24	15	981.287	0.434901	1	20	12	7162	0.462887	1	22	13.475	3393.17	4733.04	1.39487	2678	852	651	1169	3038	941	636	2449	1913	9207	13714	3814	1484	523	2035	7150	3265.88
unknown1281	0.380147	0.830994	24	6	782.59	0.914509	1	22.4427	6	4345.25	0.714961	1	23.2214	6.00675	3592.56	527.868	0.146934	6220	3115	2738	3283	4275	4296	4637	4173	2809	3434	4520	1966	2596	2640	1724	4844	3579.38
unknown1546	0.380147	0.830994	24	15	364.69	0.923391	1	23.3952	12	1024.75	0.718512	1	23.6976	13.4831	679.598	365.235	0.537427	464	431	124	392	478	172	65	1270	1299	532	997	1271	220	79	892	2157	677.688
unknown522	0.380147	0.830994	24	15	1022.48	0.425848	1	20	12	4675	0.456656	1	22	13.475	3317.91	1709.33	0.515183	3633	2424	1856	2511	3204	1864	1913	3715	4662	4709	5885	3444	2111	1737	3308	5375	3271.94
unknown524	0.380147	0.830994	24	15	21775.7	0.933357	1	28	17.9999	59209.5	0.722458	1	26	16.4821	41141.9	2765.27	0.067213	22016	12523	7615	16455	44819	14399	10008	73144	47654	39108	65695	68935	14496	10926	52114	159302	41200.6
unknown530	0.380147	0.830994	24	0	427.976	0.853305	1	24.8451	17.9999	5413.75	0.689582	1	24.4225	21.0582	5298.15	389.698	0.0735536	5915	5252	5950	5719	5272	4239	4853	5653	5572	4613	4733	5223	6091	5836	4475	5253	5290.56
unknown559	0.380147	0.830994	18	15	2503.51	0.992826	1	20	12	14238.5	0.745177	1	19	13.6167	9897.34	5204.88	0.525887	15235	9129	8830	11967	5764	8293	9451	9361	12034	17039	21800	6081	4552	3778	3157	11080	9846.94
unknown587	0.380147	0.830994	18	12	336.583	0.954076	1	20	12	5404.75	0.730532	1	19	12.0333	4878.57	545.566	0.111829	4451	4904	4585	4574	4545	4317	4233	5388	4870	6120	5887	4742	4140	3769	4185	6316	4814.12
unknown616	0.380147	0.830994	18	15	8675.49	0.998688	1	20	12	58148	0.747342	1	19	13.6167	47108.7	13603.2	0.288762	58220	41609	52274	49985	35800	43466	30261	57211	59485	64889	72264	35954	24702	25923	38277	61311	46976.9
unknown687	0.380147	0.830994	24	15	32241.4	0.601994	1	22.6735	12	91251.2	0.566327	1	23.3368	13.4682	56673.8	39389.7	0.695025	35106	24141	15059	30333	45697	23246	18342	84071	83395	93885	132862	54863	21645	16218	69075	151854	56237
unknown726	0.380147	0.830994	24	15	955.655	0.848235	1	26.0177	12	2470	0.687406	1	25.0088	13.5826	1633.81	847.826	0.518926	1013	630	218	730	1636	423	527	2635	1765	2256	3686	2173	609	312	2109	5674	1649.75
unknown1062	0.475047	0.933871	24	12	796.202	0.950498	1	21.4599	12	4700	0.810549	1	22.7299	12.0376	3269.46	1444.02	0.441669	2736	1876	1730	2082	3655	2107	2687	3839	3260	9963	4830	747	2007	2111	2558	5210	3212.38
unknown1129	0.475047	0.933871	18	15	149209	0.954081	1	20	12	773474	0.811899	1	19	13.6167	534460	273613	0.511943	672104	410633	568113	547233	293148	459037	266021	602798	663091	852984	1231418	346401	209524	203978	406989	775496	531810
unknown1148	0.475047	0.933871	18	15	340.649	0.999815	1	28	12	4478.25	0.828579	1	23	14.5119	4018.82	950.906	0.236613	4401	4292	4900	3846	4172	3263	3257	4797	4862	4185	5344	3522	2315	3439	3305	4355	4015.94
unknown1178	0.475047	0.933871	18	15	7078.85	0.988117	1	20	12	41475.2	0.824409	1	19	13.6167	30685.2	12896.3	0.420276	37600	25566	32588	33719	18062	28241	14746	37116	39001	43702	61386	21812	13517	12874	24100	44935	30560.3
unknown1597	0.475047	0.933871	18	12	2229.51	0.771152	1	20	12	17992.5	0.73421	1	19	12.0333	11366.9	6983.63	0.614381	12634	6966	5378	7920	9032	6576	7050	11048	6260	21223	34521	9966	6537	4659	4082	14819	10541.9
unknown283	0.475047	0.933871	18	12	279.661	0.921244	1	20	12	4118.25	0.799283	1	19	12.0333	3756.7	392.706	0.104535	3845	3442	3357	4097	3517	3240	3556	3830	4709	4246	3924	3594	3291	3410	3048	4259	3710.31
unknown417	0.475047	0.933871	18	12	1745.85	0.392773	1	20	12	10516.5	0.499838	1	19	12.0333	4814.95	5798.11	1.20419	3540	1163	921	1637	2055	1587	924	3345	2085	15306	20502	4173	1045	633	2827	4337	4130
unknown704	0.475047	0.933871	18	12	1932.35	0.989285	1	20	12	17988.2	0.824828	1	19	12.0333	14621.7	4254.65	0.290981	17764	11587	12729	13765	14869	13904	7979	20041	13143	22595	25077	11138	6205	7578	8968	18564	14119.1
unknown765	0.475047	0.933871	24	15	1152.58	0.64499	1	21.5648	12	11673.2	0.668831	1	22.7824	13.4583	7577.09	4891.32	0.64554	4823	3401	3629	5697	5635	5620	6326	7017	5344	15238	21300	4811	6777	5273	6233	12623	7484.19
unknown808	0.475047	0.933871	18	15	3034.55	0.999973	1	28	12	10657.5	0.828635	1	23	14.5119	7996.59	6305.37	0.788507	13921	6611	11751	10359	5811	6062	3558	9879	9816	13113	15984	3717	2121	3003	4348	7586	7977.5
unknown809	0.475047	0.933871	24	15	3761.1	0.924373	1	28	17.9999	9280.75	0.800509	1	26	16.4821	6339.62	374.289	0.0590396	2743	1631	1337	2172	7136	1731	1651	11035	7467	6680	10804	10051	2086	1172	7957	25908	6347.56
PS 36:2|PS 18:1_18:1	0.587657	1	18	0	26860.9	0.870873	1	28	12	49355.5	0.854598	1	23	4.92857	44958.9	29667.3	0.659878	104015	76473	65740	70310	24147	38965	27274	27423	45249	63069	80242	8862	33686	23503	11430	28741	45570.6
TG 38:1|TG 12:0_12:0_14:1	0.587657	1	18	15	352008	0.948846	1	20	12	1.90538e+06	0.883299	1	19	13.6167	1.31301e+06	669223	0.509686	1641001	987711	1383297	1325577	702350	1122938	672241	1496105	1606898	2141877	3033476	839276	526692	507938	997538	1919559	1.30653e+06
unknown1051	0.587657	1	18	15	3166.25	0.942731	1	20	12	11688.5	0.881189	1	19	13.6167	6435.26	6029.3	0.936917	8688	5140	5837	8437	3486	3615	3070	5252	7806	17584	21069	295	2144	2494	1875	5238	6376.88
unknown1155	0.587657	1	18	15	32166.5	0.966757	1	20	12	186354	0.889349	1	19	13.6167	131685	62910.5	0.477734	166470	102556	139080	134857	72700	118482	71211	145415	157409	205964	295487	86555	55712	52599	102981	189735	131076
unknown1517	0.587657	1	24	15	341.179	0.889936	1	24.1644	12	1086	0.86198	1	24.0822	13.5053	693.88	423.342	0.610109	402	381	124	286	682	208	145	1096	866	611	1049	1818	236	91	766	2351	694.5
unknown1656	0.587657	1	18	15	1225.42	0.999984	1	20	12	4948.25	0.900058	1	19	13.6167	3855.37	1651.95	0.428481	7256	4435	3363	3470	3295	2544	2071	4082	3665	6256	6959	2913	3015	1576	1967	4563	3839.38
unknown1666	0.587657	1	18	15	2226.33	0.96454	1	20	12	9937	0.888611	1	19	13.6167	6700.95	3815.79	0.56944	9155	4723	7223	7060	3080	5630	3064	7452	8402	11333	16113	3900	2323	2386	4783	9997	6664
unknown1698	0.587657	1	24	6	1569.42	0.915072	1	28	12	5552.25	0.871349	1	26	8.82143	5511.21	172.923	0.0313766	12838	8435	4895	5958	5380	3258	5918	6379	2739	4954	9979	4537	3056	1805	1890	5909	5495.62
unknown547	0.587657	1	24	12	1569.07	0.976469	1	28	12	10559.2	0.892547	1	26	12.0714	8512.98	1877.42	0.220536	6225	4029	5209	5877	10936	6021	4823	13024	5889	11730	18345	6273	5691	5737	8549	19847	8637.81
unknown563	0.653803	1	18	15	1065.96	0.997178	1	28	12	9692.75	0.930849	1	23	14.5119	8526.48	2490.91	0.292139	10334	7853	9874	10075	8504	8124	6264	9843	11145	9494	11063	7069	5349	6074	5744	9494	8518.94
unknown1030	0.719948	1	18	15	13655.5	0.976204	1	20	12	66030.2	0.950671	1	19	13.6167	42736.9	26460.4	0.619148	61211	26302	50024	43003	23601	33110	23896	46553	52855	79679	113159	18428	11202	14230	23238	59199	42480.6
unknown1087	0.719948	1	18	12	1024.95	0.886859	1	20	12	7645	0.924949	1	19	12.0333	5976.04	1870.04	0.312922	6073	4514	4161	5893	4974	5343	4308	7621	6464	8914	11608	3594	3527	3621	4709	6758	5755.12
unknown1274	0.719948	1	18	15	564.448	0.999946	1	28	12	4351.75	0.956493	1	23	14.5119	3669.75	1443.44	0.393336	4441	4233	3860	4119	3284	3042	2636	4485	3656	4586	5862	3303	2788	2317	1854	4180	3665.38
unknown1403	0.719948	1	18	15	11163.6	0.977673	1	28	12	31723.8	0.951043	1	23	14.5119	29492.8	18216.3	0.617653	71474	41948	34644	37216	15604	13931	20146	29221	26691	30120	46224	23860	18895	10114	12466	38449	29437.7
unknown1452	0.719948	1	18	6	995.606	0.924388	1	20	6	4966.75	0.936507	1	19	6.01667	3850.47	1264.4	0.328375	3912	2886	2313	2482	5169	3743	3633	7322	2247	3977	5829	2094	2470	3417	2550	5112	3697.25
unknown562	0.719948	1	18	15	4574.45	0.987803	1	20	12	42686.8	0.953567	1	19	13.6167	33864.3	9652.8	0.285044	40280	27097	33107	35368	23706	32335	23621	39451	39557	45579	59564	26047	18982	18327	29542	47770	33770.8
unknown753	0.719948	1	18	15	15239.7	0.982538	1	28	12	81986	0.952265	1	23	14.5119	71335	29433.4	0.412608	103987	79203	90110	86973	64202	65282	49028	88422	86850	94188	108288	38618	35170	31779	37938	79896	71245.9
unknown971	0.719948	1	24	12	645.588	0.59973	1	20	12	6815.75	0.794401	1	22	12.1	4580.57	2233.38	0.487576	2744	3187	2563	4333	3605	4102	3769	4119	3474	8285	11592	3912	4113	2172	3094	6117	4448.81
LPE 12:0	0.873774	1	24	12	602.101	0.958906	1	26.9725	12	2134.75	0.986082	1	25.4862	12.0409	1583.9	492.337	0.310839	1144	914	541	800	2174	865	460	2823	1657	1572	2979	2331	726	575	1719	4452	1608.25
NAPhe 12:0	0.873774	1	24	3	40094	0.93581	1	28	12	283206	0.982267	1	26	7.19643	265853	1407.36	0.00529374	444631	339585	281315	289803	228704	271721	256016	268488	271619	269501	411954	179752	199763	135777	100737	302446	265738
unknown1024	0.873774	1	24	18	579.12	0.660056	1	20.1831	12	4903.25	0.894157	1	22.0915	14.8517	4336.39	870.511	0.200745	4367	4875	3539	3710	3711	3833	3330	4051	4343	4525	5881	4864	5849	3813	3510	5297	4343.62
unknown1093	0.873774	1	24	12	372.999	0.700489	1	20	12	5189.75	0.91254	1	22	12.1	3266.75	1814.85	0.555553	2648	1883	1527	2441	1926	2516	2235	3284	2140	6656	9573	2390	2321	1742	1968	5305	3159.69
unknown1430	0.873774	1	18	15	1956.74	0.91351	1	28	12	6130.75	0.978112	1	23	14.5119	5665.02	3186.37	0.562464	12578	8903	6479	6995	4200	4395	3530	5450	6896	5854	8493	3280	3416	2239	1950	5828	5655.38
unknown1523	0.873774	1	18	12	1254.23	0.999994	1	20	12	10147.5	0.991675	1	19	12.0333	8589.02	1805.36	0.210194	12429	9706	6478	6022	7569	5469	6372	10975	8759	9626	14669	7536	5006	4241	4588	14567	8375.75
unknown1584	0.873774	1	18	0	16434.4	0.309966	1	28	12	20807	0.624619	1	23	4.92857	23654.9	20693.1	0.87479	74489	53494	41787	36011	12821	15255	15762	14486	18736	20385	31595	12512	10503	5198	4988	17283	24081.6
unknown1614	0.873774	1	24	15	1424.82	0.979318	1	28	17.9999	4817.5	0.989049	1	26	16.4821	3287.26	680.143	0.206903	1614	1643	443	1160	4470	1088	650	6111	3139	2920	5735	4584	1387	641	4235	13007	3301.69
unknown1638	0.873774	1	18	6	2422.9	1	1	20	6.00001	17593.8	0.991675	1	19	6.01667	13845.4	4683.45	0.338269	12152	5612	7902	9323	10776	7661	23017	28921	8524	19393	9335	4734	10310	11235	10579	32971	13277.8
unknown206	0.873774	1	18	15	7978.82	0.997606	1	28	12	55144.2	0.991391	1	23	14.5119	48206.2	16593.4	0.344217	62913	50865	57695	55326	43933	45525	36306	57162	56418	62458	72965	28736	28518	26722	29498	55456	48156
unknown577	0.873774	1	24	15	1193.6	0.65936	1	20	12	14143.2	0.893822	1	22	13.475	8993.29	6355.26	0.706667	7769	3955	4674	7829	6473	5818	5916	7468	6477	18782	25182	6132	5994	6701	6821	15167	8822.38
unknown917	0.873774	1	18	15	1686.45	1	1	20	12	7629.5	0.991675	1	19	13.6167	5768.45	2737.28	0.474527	9091	5630	7223	6911	3539	4935	3299	6869	6446	8492	13198	2382	2170	1927	2546	7213	5741.94
unknown998	0.873774	1	18	15	3992.32	0.980566	1	20	12	30227.8	0.989218	1	19	13.6167	22675.6	8117.83	0.357998	25580	16873	22274	22746	11277	21472	13822	27554	25946	33943	44656	16366	10998	8880	21074	38091	22597
FA 14:1 (physeteric acid)	1	1	18	15	119458	1	1	20	12	914398	1	1	19	13.6167	806677	165010	0.204556	1097100	973962	677114	759370	771689	684230	494171	885621	728427	974681	1299927	654555	920479	438370	486952	1034610	805079
LPE 17:1	1	1	18	12	243.598	0.998822	1	21.0501	12	965.5	0.999999	1	19.5251	12.0737	797.62	150.32	0.188461	950	681	402	593	726	480	396	1223	1115	1099	836	812	483	281	777	1643	781.062
TG 60:6	1	1	24	18	138.77	0.802229	1	20	12	2047	0.979009	1	22	14.85	1373.42	613.006	0.446334	1139	927	882	1218	1116	1005	1217	1105	1225	2471	3762	730	1196	830	1151	2092	1379.12
unknown1127	1	1	24	12	286.732	0.999958	1	20	12	4247	1	1	22	12.1	3677.24	660.923	0.179733	4603	2990	3230	4028	2950	3308	3282	4466	3557	6115	4360	2956	2307	2803	2123	5134	3638.25
unknown118	1	1	18	9	473.054	1	1	23.7736	6.00002	13630.5	1	1	20.8868	7.85742	13356.8	367.849	0.0275402	12915	13085	12796	13294	13966	13089	12500	14967	13960	14704	13605	11799	10705	13490	12016	16021	13307
unknown1186	1	1	18	15	1976.01	0.99988	1	20	12	9837.25	1	1	19	13.6167	7252.52	3248.5	0.447914	10681	5087	9615	8229	5576	6551	3643	9110	7919	12480	15111	3839	1892	2880	3854	9070	7221.06
unknown1238	1	1	18	15	2764.43	0.998891	1	28	12	9520.25	0.999999	1	23	14.5119	8367.55	4144.39	0.495293	14494	6490	13439	11042	6976	7289	3958	10134	10036	12085	12427	3533	2779	4065	5163	9770	8355
unknown1348	1	1	18	15	1441.44	0.999999	1	28	12	11424.2	1	1	23	14.5119	10874.3	2175.33	0.200044	15424	12914	9658	11852	9668	11235	8795	10465	8670	11930	16538	8559	12723	7362	6492	11598	10867.7
unknown1425	1	1	24	6	285.671	1	1	28	12	3267.25	1	1	26	8.82143	3202.56	0.64212	0.000200502	5547	2888	2065	3160	2962	2250	3482	3866	2326	3314	5137	2292	2478	2227	1629	5617	3202.5
unknown1508	1	1	18	15	1467.25	0.999984	1	20	12	9743.25	1	1	19	13.6167	7901.3	2303.02	0.291473	11132	9241	7148	7645	7467	7054	6309	8291	9536	9837	14839	4761	5546	4239	2772	10247	7879
unknown1526	1	1	18	15	1852.97	1	1	28	12	7649.5	1	1	23	14.5119	6419.09	3476.74	0.541625	11024	6219	5978	9482	103	9415	3518	7477	7008	10017	13573	0	1391	313	2560	14459	6408.56
unknown1549	1	1	18	15	969.797	0.986639	1	20	12	6329.25	0.99991	1	19	13.6167	4196.32	2259.27	0.538394	6133	2434	4287	4156	2804	3841	2238	4913	3629	7750	11867	2071	1271	2136	2618	4643	4174.44
unknown1592	1	1	18	6	306.354	0.999999	1	28	6	3894.75	1	1	23	6.29762	3698.56	66.9435	0.0180999	3180	2134	4203	3700	3899	4650	3587	3443	4494	3058	1740	4001	4260	4860	4075	3856	3696.25
unknown1622	1	1	18	12	2223.67	0.994917	1	20	12	8672.25	0.999987	1	19	12.0333	6315.47	2464.65	0.390256	8058	5956	3359	4965	5276	3008	2153	8999	8920	9242	14352	2175	2855	2276	2571	12224	6024.31
unknown1672	1	1	24	18	1306.56	0.970302	1	28	17.9999	4219.75	0.999555	1	26	18.1071	2750.18	134.178	0.048789	1547	1482	394	1144	2689	807	432	5255	4321	2261	4409	2497	992	390	4759	10738	2757.31
unknown1677	1	1	18	15	1947.02	0.999969	1	28	12	15278.5	1	1	23	14.5119	11813.8	7786.71	0.659122	23704	12198	11641	12782	8477	10008	10049	12715	12669	13796	27662	6987	4475	2704	1953	16823	11790.2
unknown1689	1	1	18	9	2622.31	0.999691	1	27.3065	12	5588.5	1	1	22.6533	10.6409	4324.55	1664.27	0.384843	4597	204	232	0	117	8730	4256	8291	454	5397	16400	103	1361	253	2335	14961	4230.69
unknown308	1	1	18	12	3084.75	0.88813	1	20	12	50286	0.993495	1	19	12.0333	32434.5	16591.8	0.511548	20426	16868	13590	28311	18617	19511	23556	27381	18430	62551	103637	16526	20753	12893	17724	66818	30474.5
unknown388	1	1	18	12	934.088	0.958245	1	20	12	6277.5	0.999116	1	19	12.0333	4739.99	1682.85	0.355034	5884	2849	3273	5289	3539	3626	3610	4982	4382	8827	9136	2765	2719	2808	2931	6039	4541.19
unknown463	1	1	18	15	1152.05	1	1	28	12	17921.8	1	1	23	14.5119	17434.8	1270.86	0.072892	19684	13562	18926	21030	19693	14648	16124	19165	20422	19367	20753	11145	12983	15386	11956	24051	17430.9
unknown610	1	1	24	12	223.446	0.998998	1	23.0287	12	4345.25	0.999999	1	23.5144	12.0051	4085.03	328.964	0.0805291	4391	3077	3595	4413	3836	4318	3780	4739	4052	4335	5094	3900	3594	4176	3088	4890	4079.88
unknown708	1	1	18	12	925.249	0.997838	1	20	12	5719.5	0.999998	1	19	12.0333	4193.73	1723.56	0.410984	5891	2534	2887	4851	2624	1852	3442	5305	4570	6494	10339	1475	1250	2716	1447	6165	3990.12
unknown739	1	1	18	12	2157.38	0.960584	1	22.2166	12	8380.5	0.999213	1	20.1083	12.1334	6537.06	1319.14	0.201795	6221	4181	3021	6014	5090	2744	2903	8935	11352	6143	8697	7330	2869	2739	8417	15851	6406.69
unknown766	1	1	18	15	8006.92	1	1	20	12	56238.8	1	1	19	13.6167	49956.6	10147.4	0.203125	63837	43646	57240	55515	34869	44686	33658	62809	64070	75888	47326	37671	26070	26271	43919	80259	49858.4
unknown767	1	1	18	15	27344.3	0.999994	1	28	12	151780	1	1	23	14.5119	118984	68267.8	0.573756	169741	117012	141003	136443	87341	109228	79262	141669	133180	170739	244417	58784	56946	45631	64239	144803	118777
unknown877	1	1	18	15	1482.63	0.998772	1	20	12	9797.75	0.999999	1	19	13.6167	7207.74	3103.8	0.43062	9043	5543	8556	8028	4537	6470	3787	8893	8513	10542	16679	3457	2833	3902	4467	9593	7177.69
unknown897	1	1	24	18	422.673	0.997398	1	28	6	6108.5	0.999997	1	26	25.5357	6076.39	486.611	0.0800822	4934	5708	5868	5825	5842	6773	6537	5282	6487	5467	4002	6921	7179	7279	6555	6102	6047.56
unknown924	1	1	18	15	913.936	0.999994	1	28	12	5180.75	1	1	23	14.5119	5037.44	907.917	0.180234	6279	3767	6402	6653	4761	3781	4097	5409	3189	5710	5438	6386	5468	4073	4679	4463	5034.69
unknown991	1	1	24	12	2318.6	0.998981	1	20	12	17952.2	0.999999	1	22	12.1	13314.5	5143.82	0.386334	15570	8507	13470	13848	9749	11737	8461	17233	9863	25609	30213	6124	4628	5595	5658	21911	13011

## Sheet: shared cycling in proteinAM AS
CycID	JTK_pvalue	JTK_BH.Q	JTK_period	JTK_adjphase	JTK_amplitude	LS_pvalue	LS_BH.Q	LS_period	LS_adjphase	LS_amplitude	meta2d_pvalue	meta2d_BH.Q	meta2d_period	meta2d_phase	meta2d_Base	meta2d_AMP	meta2d_rAMP	0	0.1	0.2	0.3	6	6.1	6.2	6.3	12	12.1	12.2	12.3	18	18.1	18.2	18.3	ProteinM	CycID	JTK_pvalue	JTK_BH.Q	JTK_period	JTK_adjphase	JTK_amplitude	LS_pvalue	LS_BH.Q	LS_period	LS_adjphase	LS_amplitude	meta2d_pvalue	meta2d_BH.Q	meta2d_period	meta2d_phase
unknown1727	0.000320124	0.0554086	24	15	1715.79	0.476255	1	20	12	30488	0.00149238	0.21957	22	13.475	9673.85	27384	2.83073	648	953	271	820	1158	2055	1302	1549	1520	35670	75866	8896	3039	1461	2013	5777	8937.38	unknown1727	0.0419656	0.277096	24	18	4593.37	0.999918	1	20	17.9999	15105.5	0.175024	0.841424	22	18.15
unknown1115	0.000446109	0.0554086	18	6	3286.28	0.842585	1	20	6	5702	0.0033402	0.21957	19	6.01667	3343.16	2712.67	0.811409	959	911	778	861	5737	5216	5719	6136	591	858	959	546	4801	4181	3666	6312	3014.44	unknown1115	0.0144977	0.199677	18	6	1791.46	0.963506	1	20	6	3759.5	0.0736279	0.65697	19	6.01667
Cer 34:1;3O|Cer 14:1;2O/20:0;(2OH)	0.000572095	0.0554086	18	6	71070.8	0.849499	1	20	6	121062	0.00419379	0.21957	19	6.01667	68423	60753.2	0.887905	13563	13197	11991	12826	117708	109270	119086	138186	9030	13184	17073	8469	93128	84644	78167	137453	61060.9	Cer 34:1;3O|Cer 14:1;2O/20:0;(2OH)	0.00980952	0.174781	18	6	41180.1	0.964283	1	20	6	78370.2	0.0535461	0.601055	19	6.01667
unknown1295	0.000572095	0.0554086	18	6	98236.8	0.904579	1	20	6	171767	0.0044332	0.21957	19	6.01667	102092	81061.1	0.794001	28446	26205	22583	25255	168407	157210	165591	195859	17847	24829	33039	15989	142685	133171	116839	202348	92268.9	unknown1295	0.0144977	0.199677	18	6	60282.6	0.976517	1	20	6	116556	0.0744323	0.65697	19	6.01667
unknown429	0.000987235	0.0554086	18	15	25333.9	0.641454	1	20	12	58286.5	0.00529703	0.21957	19	13.6167	30337.6	35484.6	1.16966	52835	24985	31989	40237	10123	10016	10369	17666	54152	67667	83496	27831	10991	10262	8072	19212	29993.9	unknown429	0.000987235	0.0714949	18	15	13674.4	0.582193	1	20	12	30566	0.00486338	0.321126	19	13.6167
Cer 35:0;2O|Cer 14:0;2O/21:0	0.000987235	0.0554086	18	6	1352.34	0.692838	1	20	6	3761	0.00566864	0.21957	19	6.01667	2467.01	1425.16	0.577686	1590	1481	1137	1315	3772	2830	3435	5007	1023	1435	2100	745	2110	2522	1932	4275	2294.31	Cer 35:0;2O|Cer 14:0;2O/21:0	0.0299489	0.256624	18	6	653.72	0.999864	1	20	6	1886	0.135003	0.756183	19	6.01667
Cer 44:0;3O|Cer 18:0;3O/26:0	0.000987235	0.0554086	24	15	13140	0.238397	1	24.5682	12	51075	0.0022016	0.21957	24.2841	13.5194	35261.6	17539	0.497397	19807	21220	14250	19143	30136	27886	24802	38852	32399	48189	83850	39862	44592	28030	32902	59703	35351.4	Cer 44:0;3O|Cer 18:0;3O/26:0	0.0299489	0.256624	18	15	47791.9	0.190051	1	20	12	150945	0.0351112	0.526948	19	13.6167
unknown1279	0.000987235	0.0554086	24	18	6626.65	0.0700292	1	21.5648	12	13237	0.000731413	0.21957	22.7824	14.8822	7437.76	8218.02	1.1049	2994	4516	3142	4109	1357	2092	1288	3014	6422	13126	19710	13690	17010	6616	6967	13335	7461.75	unknown1279	0.0299489	0.256624	18	15	7744.59	0.936615	1	20	12	24863.5	0.128296	0.756183	19	13.6167
Cer 36:1;3O|Cer 14:1;2O/22:0;(2OH)	0.000987235	0.0554086	18	6	106861	0.697039	1	20	6	216124	0.00569885	0.21957	19	6.01667	128041	99269.8	0.775296	55195	42829	40545	41290	209527	182138	211571	261260	32116	46788	67516	24413	150254	140983	117175	232587	116012	Cer 36:1;3O|Cer 14:1;2O/22:0;(2OH)	0.0419656	0.277096	18	6	63940.5	0.995527	1	20	6	129176	0.174439	0.841424	19	6.01667
Cer 36:4;4O|Cer 15:3;3O/21:1;(2OH)	0.000987235	0.0554086	18	6	38179.2	0.942777	1	20	6	67336	0.00742689	0.245197	19	6.01667	40118.4	32030.9	0.798409	9882	8724	7587	9015	67466	60160	66507	75211	6451	8895	11428	5882	58246	52379	49092	82865	36236.9	Cer 36:4;4O|Cer 15:3;3O/21:1;(2OH)	0.0419656	0.277096	18	6	29163.6	0.9976	1	20	6	52752.8	0.174715	0.841424	19	6.01667
unknown210	0.000987235	0.0554086	24	15	2574.58	0.454924	1	21.4599	12	14950	0.00391102	0.21957	22.7299	13.4582	8471.28	7588.41	0.895781	4239	2955	2926	4027	4810	5162	5812	6361	6069	17483	30238	6010	9288	6449	6589	14736	8322.12	unknown210	0.0419656	0.277096	24	18	8727.82	0.29173	1	23.0287	17.9999	26506.2	0.0661448	0.65697	23.5144	18.0076
unknown1164	0.000987235	0.0554086	18	6	13661.8	0.779238	1	20	6	28533	0.00628514	0.21957	19	6.01667	17714.3	12308.3	0.694821	9715	6553	5857	6182	28922	24502	26600	34108	4530	7990	11616	4076	20578	19059	17640	31637	16222.8	unknown1164	0.0419656	0.277096	18	6	6544.98	0.999676	1	20	6	17552.2	0.174991	0.841424	19	6.01667
Cer d33:1	0.00164724	0.0626789	18	6	2110.01	0.855609	1	20	6	4192	0.0106615	0.265798	19	6.01667	2615.23	1824.61	0.697686	934	1010	847	969	4133	3804	4212	4619	776	953	1187	900	3200	3128	2874	4760	2394.12	Cer d33:1	0.00421867	0.13726	18	6	1028.66	0.878667	1	20	6	2729.25	0.024456	0.511734	19	6.01667
Cer d34:0	0.00164724	0.0626789	18	6	40298.9	0.937266	1	20	6	74784.2	0.0115383	0.266897	19	6.01667	45813.3	34142.4	0.745251	15689	12616	10233	11150	78475	66844	70689	83129	9717	13776	17241	9250	63982	60957	57035	86032	41675.9	Cer d34:0	0.0144977	0.199677	18	6	27916.8	0.98887	1	20	6	59368.5	0.0751936	0.65697	19	6.01667
unknown1391	0.00164724	0.0626789	18	6	2197.86	0.877563	1	20	6	5890.5	0.0108984	0.265798	19	6.01667	4023.14	2140.53	0.532054	2287	2061	1894	2272	5832	4849	5647	7234	1707	2336	3151	1480	4281	4417	3659	7113	3763.75	unknown1391	0.0210199	0.239541	18	6	1296.66	0.998553	1	20	6	3639	0.102087	0.704773	19	6.01667
PE-Cer 36:1;2O|PE-Cer 18:0;2O/18:1	0.00164724	0.0626789	18	6	25545.6	0.840999	1	20	6	54058.2	0.0105033	0.265798	19	6.01667	33281	23777.5	0.714445	15637	12896	9604	10726	54838	45168	52116	64111	9600	13258	16661	8020	40658	34683	33275	65144	30399.7	PE-Cer 36:1;2O|PE-Cer 18:0;2O/18:1	0.0299489	0.256624	18	6	18211.5	0.994653	1	20	6	38124	0.134455	0.756183	19	6.01667
unknown1128	0.00164724	0.0626789	18	6	2409.11	0.816313	1	20	6	5474.25	0.0102351	0.265798	19	6.01667	3444.17	2325.39	0.675168	1615	1500	1222	1242	5352	4594	5393	6558	1192	1628	2189	815	4301	3785	3040	6172	3162.38	unknown1128	0.0299489	0.256624	18	6	1769.53	0.996176	1	20	6	3752.75	0.134616	0.756183	19	6.01667
unknown1354	0.00164724	0.0626789	24	18	4197.39	0.089934	1	21.7778	12	8570	0.00145437	0.21957	22.8889	14.8895	4885.99	5185.13	1.06122	1814	2703	1931	2979	1171	1512	968	1986	4107	9174	13169	7830	11091	4619	3798	9521	4898.31	unknown1354	0.0299489	0.256624	18	15	6193.73	0.858457	1	20	12	17315.2	0.119831	0.751452	19	13.6167
unknown466	0.00164724	0.0626789	24	15	1155.41	0.413351	1	20.6557	12	7986.75	0.00564601	0.21957	22.3279	13.4632	4826.32	3805.6	0.78851	2730	2174	2366	3477	2686	3497	4135	3364	3997	9020	14798	4132	4131	3835	3811	7598	4734.44	unknown466	0.0419656	0.277096	24	18	4320.6	0.253247	1	22.3291	17.9999	12770.5	0.0589228	0.621344	23.1646	18.0234
unknown1068	0.00164724	0.0626789	18	6	12695.9	0.848481	1	20	6	25461.5	0.0105844	0.265798	19	6.01667	15465.3	11477.9	0.74217	6825	4612	4885	4591	25763	21615	26905	27563	3790	6291	8831	2567	16961	19490	13532	30970	14074.4	unknown1068	0.0419656	0.277096	18	6	7409.24	0.989401	1	20	6	14378.5	0.173622	0.841424	19	6.01667
unknown820	0.00215962	0.0697515	24	15	735.037	0.479431	1	21.1511	12	5795	0.00815158	0.260918	22.5755	13.4589	3892.87	2205.37	0.566515	2254	2891	2306	2738	2815	2855	2434	2985	2985	7070	9968	3157	4021	2982	3477	6589	3845.44	unknown820	0.0499351	0.298155	24	18	2829.31	0.227319	1	28	17.9999	12177.7	0.0621867	0.637485	26	18.1071
unknown470	0.00267199	0.0697515	18	15	852.064	0.27472	1	20	12	8219.5	0.00603164	0.21957	19	13.6167	7149.74	1283.62	0.179534	6532	7110	7258	7826	6166	6067	6266	6977	9001	7435	7783	8659	6975	6129	6864	7149	7137.31	unknown470	0.000987235	0.0714949	18	15	2066.52	0.380801	1	20	12	9713.5	0.00334063	0.302705	19	13.6167
GlcCerd14:14E/20:02OH	0.00267199	0.0697515	18	6	4087.08	0.976116	1	20	6	8842.75	0.0181245	0.317016	19	6.01667	5533.53	3941.67	0.712325	1641	1710	1499	1413	9191	7118	8490	10572	1293	1813	2236	1383	6879	7086	6383	12187	5055.88	GlcCerd14:14E/20:02OH	0.00421867	0.13726	18	6	3421.34	0.902481	1	20	6	6852.25	0.025017	0.511734	19	6.01667
unknown601	0.00267199	0.0697515	24	15	3637.71	0.462939	1	21.7778	12	21465.5	0.00951859	0.265798	22.8889	13.4589	12324	10649.2	0.864104	5495	3704	4525	6594	7493	7759	8959	9251	8737	25935	42395	8795	13897	8006	9723	22917	12136.6	unknown601	0.0210199	0.239541	24	18	12142.4	0.231391	1	23.3952	17.9999	38245.5	0.0307682	0.517839	23.6976	18.0029
unknown139	0.00267199	0.0697515	24	15	6327.55	0.560539	1	20.8511	12	47834	0.0112388	0.265798	22.4255	13.4611	26088.1	26167.2	1.00303	11572	8584	9981	13411	14720	16062	18729	18738	16668	55737	102221	16710	25319	16395	18970	43897	25482.1	unknown139	0.0299489	0.256624	24	18	28640.3	0.282227	1	23.52	17.9999	88139.2	0.0487982	0.581653	23.76	18.0018
unknown1276	0.00267199	0.0697515	24	18	2447.3	0.0713042	1	21.253	12	5127	0.00182251	0.21957	22.6265	14.8727	2885.01	3188.5	1.1052	1200	1948	1247	1751	372	826	410	1353	2506	5107	7582	5313	6442	2578	2639	5082	2897.25	unknown1276	0.0299489	0.256624	18	15	3220.87	0.956066	1	20	12	10007.5	0.130372	0.756183	19	13.6167
unknown1581	0.00267199	0.0697515	18	15	3191.7	0.464931	1	20	12	12596.2	0.00955423	0.265798	19	13.6167	6132.94	7066.85	1.15228	8312	4206	4670	6427	2299	1726	1622	5554	6429	17869	19688	6399	2668	2414	1976	4773	6064.5	unknown1581	0.0299489	0.256624	18	15	1018.23	0.717851	1	20	12	2754.75	0.104049	0.704773	19	13.6167
unknown1310	0.00267199	0.0697515	18	6	1615.39	0.950031	1	20	6	4638.25	0.0177089	0.315528	19	6.01667	3307.77	1539.7	0.465481	2203	1924	1707	1778	4348	4159	4109	5937	1453	2123	3006	1270	3379	3628	2967	5948	3121.19	unknown1310	0.0419656	0.277096	18	6	802.213	0.99947	1	28	6.00002	3178.25	0.174964	0.841424	23	6.29763
unknown1344	0.00267199	0.0697515	18	6	5542.3	0.933456	1	20	6	14971.2	0.0174438	0.315528	19	6.01667	10538.9	5110.68	0.484936	7106	6241	5019	5447	13773	13041	14321	18750	4428	6630	10083	3813	10633	10816	9547	19065	9919.56	unknown1344	0.0419656	0.277096	18	6	2258.5	0.998946	1	28	6.00001	9960.75	0.174894	0.841424	23	6.29763
unknown910	0.00421867	0.078272	18	15	2167.81	0.387598	1	20	12	7408.75	0.0121263	0.266897	19	13.6167	3780.39	3950.96	1.04512	5042	3099	2986	3778	1834	1647	1970	2712	6008	9201	11207	3219	1793	1505	1685	2188	3742.12	unknown910	0.000987235	0.0714949	18	15	1854.21	0.580328	1	20	12	4759.75	0.00484963	0.321126	19	13.6167
unknown1034	0.00421867	0.078272	24	18	3332.24	0.0669882	1	20.3695	12	7519.5	0.00259187	0.21957	22.1848	14.854	3929.78	4618.41	1.17523	1782	2495	1949	2613	737	1165	821	1470	3881	8304	11016	6877	7661	3195	2680	6775	3963.81	unknown1034	0.0065055	0.155371	18	15	7134.88	0.861484	1	20	12	17594.2	0.0346586	0.526948	19	13.6167
unknown1048	0.00421867	0.078272	24	18	4882.75	0.125935	1	20.3695	12	11906	0.00453724	0.21957	22.1848	14.854	5958.22	7308.22	1.22658	2328	3448	2718	3507	948	1699	1094	2419	4826	13041	20327	9430	11262	4081	4363	10702	6012.06	unknown1048	0.00980952	0.174781	18	15	12043.8	0.846058	1	20	12	28151	0.0480667	0.58016	19	13.6167
unknown839	0.00421867	0.078272	24	15	1255.29	0.384911	1	20.7529	12	7276.5	0.0120535	0.266897	22.3765	13.462	4303.5	3491.78	0.811383	2085	2346	2193	2790	2253	2445	2396	2603	3156	9396	13424	3130	4645	3318	3961	7393	4220.88	unknown839	0.0144977	0.199677	24	18	3602.89	0.244363	1	27.6489	17.9999	14611.5	0.0235337	0.511734	25.8245	18.0903
unknown1448	0.00421867	0.078272	18	15	3343.2	0.536779	1	20	12	14639.2	0.0160562	0.304985	19	13.6167	6636.83	8591.52	1.29452	5921	5357	3674	6649	1162	1515	1224	3412	4542	16172	31003	6840	5233	2208	1981	7965	6553.62	unknown1448	0.0210199	0.239541	18	15	6171.63	0.926758	1	20	12	11455	0.0962007	0.683451	19	13.6167
unknown1055	0.00421867	0.078272	24	15	4249.36	0.150036	1	28	17.9999	11274.2	0.00529471	0.21957	26	16.4821	7486.04	1607.51	0.214734	2481	3293	2266	3171	4948	5948	5298	4779	4595	11466	17908	7981	14628	7160	8431	14878	7451.94	unknown1055	0.0299489	0.256624	24	18	6520.76	0.298094	1	22.4427	18	32323	0.0510535	0.59386	23.2214	18.0202
unknown1395	0.00421867	0.078272	24	18	4799.66	0.103889	1	20.6557	12	10530.8	0.0038273	0.21957	22.3279	14.8587	5538.6	6455.67	1.16558	2549	3284	2605	3056	868	1443	1014	2577	4558	9438	17209	10918	10616	4368	4154	10587	5577.75	unknown1395	0.0299489	0.256624	18	0	4976.62	0.899807	1	20	12	12915.5	0.124335	0.756183	19	15.2
PE-Cer 36:0;2O|PE-Cer 21:0;2O/15:0	0.00421867	0.078272	18	6	4752.82	0.891826	1	20	6	13346.5	0.0247663	0.378233	19	6.01667	8531.76	5459.45	0.639897	5488	3882	2849	3223	12217	9485	12658	19026	3379	4017	5582	2146	8190	9727	7195	16859	7870.19	PE-Cer 36:0;2O|PE-Cer 21:0;2O/15:0	0.0419656	0.277096	18	6	3205.49	0.999938	1	20	6	7848	0.175026	0.841424	19	6.01667
unknown508	0.00421867	0.078272	18	6	5342.9	0.777203	1	20	5.99999	11876.2	0.0220342	0.365636	19	6.01666	7253.45	5374.31	0.740933	2971	1537	2224	3111	10570	9568	13897	13470	2662	4858	5766	1394	5664	8714	6195	13034	6602.19	unknown508	0.0419656	0.277096	18	6	2606.22	0.999811	1	20	6	6190.75	0.175009	0.841424	19	6.01667
unknown649	0.00421867	0.078272	24	15	5042.2	0.278727	1	25.4179	12	17039	0.00910791	0.265798	24.7089	13.5542	11946.4	4873.4	0.407939	5475	5150	5100	9085	8672	8300	9788	9823	8908	19243	28615	11390	17024	10118	12530	22940	12010.1	unknown649	0.0419656	0.277096	24	18	9143.42	0.253099	1	23.1496	17.9999	42214.2	0.0588947	0.621344	23.5748	18.0058
unknown1202	0.00421867	0.078272	24	15	16542.8	0.439678	1	24.0327	12	63925.8	0.0135218	0.287294	24.0163	13.501	41268.8	23686.7	0.573962	17579	20124	15911	21024	27966	28218	31622	32016	23624	68104	124732	39243	62297	30301	38797	78853	41275.7	unknown1202	0.0419656	0.277096	24	18	47086.9	0.335133	1	25.1282	17.9999	211798	0.074035	0.65697	24.5641	18.0095
unknown1668	0.0065055	0.098019	18	15	5860.5	0.797445	1	20	12	15378.8	0.032483	0.445726	19	13.6167	7705.18	9467.19	1.22868	14500	7878	6808	7663	2621	2547	2152	4249	5073	17377	28193	10872	4379	1514	2060	3930	7613.5	unknown1668	4.22e-05	0.0611596	18	15	5201.48	0.332997	1	20	12	11793.8	0.000170982	0.302705	19	13.6167
PC O-38:3|PC O-20:1_18:2	0.0065055	0.098019	18	15	923.481	0.994378	1	20	12	2144	0.0390771	0.471656	19	13.6167	1422.04	1236.6	0.869597	2837	2210	1562	1811	512	632	397	1095	1833	2320	3088	1335	755	546	354	1274	1410.06	PC O-38:3|PC O-20:1_18:2	0.000572095	0.0611596	18	15	659.024	0.858146	1	20	12	1378.5	0.00423151	0.302705	19	13.6167
Cer 34:1;3O|Cer 14:0;2O/20:1;O	0.0065055	0.098019	18	6	20232.1	0.834555	1	20	6	40123.5	0.0337477	0.445726	19	6.01667	23005.6	19708.8	0.856696	6652	3384	5572	6086	34633	33219	46022	46620	5741	8339	9063	3127	21261	27393	24081	48684	20617.3	Cer 34:1;3O|Cer 14:0;2O/20:1;O	0.0419656	0.277096	18	6	9093.22	0.999718	1	20	6	21133.8	0.174997	0.841424	19	6.01667
unknown1059	0.0065055	0.098019	24	15	1449.57	0.248927	1	24.9858	12	5278	0.0120251	0.266897	24.4929	13.5357	3824.21	1366.44	0.357314	1892	1912	1940	3247	2952	2680	3182	2825	3029	6367	8430	3286	5510	3326	4534	6272	3836.5	unknown1059	0.0419656	0.277096	24	18	2774.69	0.203554	1	22.9091	17.9999	12323.7	0.0492268	0.581653	23.4545	18.0097
unknown1229	0.0065055	0.098019	18	6	4410.58	0.694383	1	20	6	13197.2	0.02891	0.410966	19	6.01667	7804.98	6044.07	0.774386	4478	2316	2583	2716	12390	8344	13139	18916	2564	4508	6358	1601	5702	7505	5147	14894	7072.56	unknown1229	0.0419656	0.277096	18	6	2175.24	0.999247	1	20	6	5152.5	0.174934	0.841424	19	6.01667
PC P-38:3 or PC O-38:4 Isomer A	0.00980952	0.11904	18	15	3870	0.952861	1	20	12	10415	0.0530233	0.543549	19	13.6167	6444.11	5626.33	0.873097	11641	6405	7168	8718	2380	3838	2049	5504	9282	12899	14417	5062	3031	2931	1916	4993	6389.62	PC P-38:3 or PC O-38:4 Isomer A	0.000987235	0.0714949	18	15	2701.68	0.611777	1	20	12	5571.5	0.00508057	0.325882	19	13.6167
unknown1369	0.00980952	0.11904	18	15	5802.52	0.920673	1	20	12	14120.5	0.0515424	0.543549	19	13.6167	7697.18	8653.93	1.1243	12495	7934	7974	12102	2424	3080	1966	4712	10011	19502	23223	3746	3384	2767	1519	4975	7613.38	unknown1369	0.000987235	0.0714949	18	15	3238.02	0.505948	1	20	12	6964.25	0.00429658	0.302705	19	13.6167
unknown814	0.00980952	0.11904	18	15	6779.03	0.949802	1	20	12	16617	0.052883	0.543549	19	13.6167	10260.9	9119.47	0.888755	17504	10956	11113	14811	5175	4383	3760	7605	13298	21903	23266	8001	4863	4515	2669	8940	10172.6	unknown814	0.00164724	0.0821791	18	15	4559.07	0.304581	1	20	12	9387.25	0.0043135	0.302705	19	13.6167
unknown608	0.00980952	0.11904	18	6	2086.32	0.99279	1	20	6.00001	5204.25	0.0548454	0.550391	19	6.01667	3742.37	1840.19	0.491717	1288	1397	1718	2442	5388	5516	4243	5670	2291	3431	3033	1113	4038	4999	4166	5577	3519.38	unknown608	0.00421867	0.13726	18	6	1574.9	0.98238	1	20	6	4200.25	0.0268802	0.511734	19	6.01667
unknown1016	0.00980952	0.11904	18	15	3458.46	0.419601	1	20	12	20319.2	0.0267252	0.393213	19	13.6167	8365.78	11974.8	1.4314	7424	5293	4601	7846	3045	2443	2999	4540	7378	25211	39644	9044	2779	1894	2296	5560	8249.81	unknown1016	0.0065055	0.155371	18	15	6662.01	0.281149	1	20	12	12852.5	0.0133591	0.441046	19	13.6167
unknown850	0.00980952	0.11904	18	15	11786.8	0.871416	1	20	12	30621.2	0.0492549	0.539401	19	13.6167	17217.6	17642.3	1.02467	29458	15412	17217	23806	5904	7324	5790	11759	22373	37295	50512	12305	8150	6272	3063	16108	17046.8	unknown850	0.00980952	0.174781	18	15	5993.97	0.44855	1	20	12	13538.2	0.0282754	0.515656	19	13.6167
PE-Cer 34:1;3O	0.00980952	0.11904	18	6	12196.2	0.952711	1	20	6	24984.5	0.0530164	0.543549	19	6.01667	14718.5	12105.2	0.822443	3682	3133	2336	2410	28582	19570	22156	29630	2437	3402	4186	2308	22650	17311	17032	31201	13251.6	PE-Cer 34:1;3O	0.0144977	0.199677	18	6	11173	0.969713	1	20	6	19911.5	0.0740119	0.65697	19	6.01667
PG 36:1|PG 18:0_18:1	0.00980952	0.11904	18	6	2550.71	0.92922	1	20	6	6246	0.0519367	0.543549	19	6.01667	4074.44	2477.75	0.608119	2706	1685	1462	1882	5936	5291	6027	7730	1821	2396	3103	910	3522	4149	2671	9096	3774.19	PG 36:1|PG 18:0_18:1	0.0144977	0.199677	18	6	1473.96	0.986127	1	20	6	3489.5	0.0750247	0.65697	19	6.01667
unknown690	0.00980952	0.11904	18	15	7146.02	0.833714	1	20	12	16549	0.0474856	0.533026	19	13.6167	8858.57	10010.5	1.13003	15097	8367	9089	12873	2702	2019	2809	7531	17679	23758	19588	5171	2827	2263	1900	6513	8761.62	unknown690	0.0144977	0.199677	18	15	2738.27	0.911288	1	20	12	5260.25	0.0703737	0.65697	19	13.6167
unknown1293	0.00980952	0.11904	24	15	2702.92	0.240276	1	21.7778	12	8533	0.0166177	0.30832	22.8889	13.4589	5163	3693.66	0.71541	2163	2908	2178	3057	2842	2872	2697	2843	3775	8760	15394	6203	9349	3782	4451	8294	5098	unknown1293	0.0210199	0.239541	18	15	7873.28	0.199835	1	20	12	25086.5	0.027188	0.511734	19	13.6167
DG 38:3	0.00980952	0.11904	24	15	551.897	0.626004	1	20	12	8166.75	0.0374147	0.463264	22	13.475	4601.98	4400.89	0.956303	2659	2520	2310	2705	2354	2938	2704	3606	3139	9572	16983	2973	3480	2870	2870	8055	4483.62	DG 38:3	0.0419656	0.277096	24	18	3802.47	0.300179	1	21.8859	17.9999	11736	0.0677008	0.65697	22.9429	18.0383
unknown832	0.00980952	0.11904	24	15	2131.93	0.539042	1	20.6557	12	17267	0.033008	0.445726	22.3279	13.4632	9341.26	9604.41	1.02817	4745	2460	3626	4991	5410	4912	7596	6684	5798	21705	35262	6303	8542	4994	6287	16435	9109.38	unknown832	0.0419656	0.277096	24	18	8772.72	0.344745	1	21.7778	17.9999	26261	0.0757494	0.65697	22.8889	18.0425
unknown852	0.00980952	0.11904	24	18	4960.35	0.175235	1	20.5594	12	14522.2	0.012662	0.275982	22.2797	14.8569	8048.06	8249.64	1.02505	4018	5782	3763	5359	2117	3164	2256	4288	6884	16721	24437	10047	13290	5535	5959	16005	8101.56	unknown852	0.0419656	0.277096	18	15	9056.8	0.742828	1	20	12	25491	0.139288	0.759536	19	13.6167
unknown1023	0.00980952	0.11904	24	15	2206.17	0.587129	1	20.464	12	21133.8	0.0354605	0.44724	22.232	13.4659	11421.9	11831	1.03582	4884	4031	4828	5750	6688	6014	9465	9471	6905	26758	43683	7189	9096	6123	6871	20254	11125.6	unknown1023	0.0419656	0.277096	24	18	10581.5	0.45799	1	22.2166	17.9999	28401.7	0.0951729	0.682303	23.1083	18.0268
PC P-36:1 or PC O-36:2	0.0144977	0.137913	18	15	2812.87	0.996364	1	20	12	7298.5	0.0756544	0.598523	19	13.6167	4945.16	3862.71	0.781109	9264	7569	4849	6135	2432	2298	1930	3990	5527	7733	11151	4783	3050	2204	1303	4306	4907.75	PC P-36:1 or PC O-36:2	0.000572095	0.0611596	18	15	2015.08	0.86127	1	20	12	4511	0.00424512	0.302705	19	13.6167
PE P-38:2 or PE O-38:3	0.0144977	0.137913	18	15	4197.74	0.96816	1	20	12	10045	0.0739159	0.598523	19	13.6167	5758.58	6371.98	1.10652	10031	8399	7210	8083	1854	2147	1517	3505	7392	10718	16658	5412	2390	1642	1105	3087	5696.88	PE P-38:2 or PE O-38:3	0.000572095	0.0611596	18	15	3171.2	0.785481	1	20	12	6000.75	0.00391296	0.302705	19	13.6167
unknown1717	0.0144977	0.137913	18	15	9038.77	0.709064	1	20	12	27945.8	0.0573364	0.557231	19	13.6167	10870.2	18914.6	1.74004	17084	9277	5089	11616	1606	1319	1094	3923	3610	33124	60926	14123	2528	647	938	4088	10687	unknown1717	0.000572095	0.0611596	18	15	11765	0.343702	1	20	12	21122	0.00187471	0.302705	19	13.6167
unknown1554	0.0144977	0.137913	18	15	6127.79	0.99827	1	20	12	17768.2	0.0757715	0.598523	19	13.6167	12237.5	9069.34	0.74111	19421	17591	14585	17036	6508	6701	4499	10808	14852	18655	26415	11151	7214	4785	3068	11106	12149.7	unknown1554	0.000987235	0.0714949	18	15	6211.93	0.657482	1	20	12	13335	0.00541336	0.329717	19	13.6167
unknown514	0.0144977	0.137913	18	15	5967.98	0.971158	1	20	12	15393.2	0.0741012	0.598523	19	13.6167	9840.97	8283.51	0.841737	15884	10807	11286	15159	3884	5126	4408	7387	12814	19747	21445	7567	5572	3745	3568	7773	9760.75	unknown514	0.00164724	0.0821791	18	15	4494.9	0.613914	1	20	12	9599.25	0.00798551	0.389727	19	13.6167
unknown1599	0.0144977	0.137913	18	15	7242.72	0.994728	1	20	12	15957.5	0.0755539	0.598523	19	13.6167	9896.66	9890.65	0.999393	19777	12872	14527	12812	2940	4123	2339	6950	12645	17702	25788	7695	4663	2953	1712	7316	9800.88	unknown1599	0.00164724	0.0821791	18	15	4410.58	0.814444	1	20	12	8368.25	0.0102147	0.398658	19	13.6167
unknown975	0.0144977	0.137913	18	6	1214.1	0.976289	1	20	5.99999	4038.25	0.0744182	0.598523	19	6.01666	3087.51	1152.26	0.373202	1742	1711	1933	2228	3732	3644	4906	3871	2035	2629	2215	1678	3315	3403	4118	4006	2947.88	unknown975	0.00421867	0.13726	18	6	768.979	0.961237	1	20	6	3420.75	0.0263899	0.511734	19	6.01667
unknown983	0.0144977	0.137913	18	15	48384.3	0.829213	1	20	12	145890	0.0651702	0.598523	19	13.6167	79301.7	83471.6	1.05258	115941	73404	88528	102161	26906	35734	25822	59594	102933	179401	248443	52782	31803	26223	18066	68153	78493.4	unknown983	0.0065055	0.155371	18	15	28280.4	0.546607	1	20	12	59203.5	0.0236084	0.511734	19	13.6167
unknown1138	0.0144977	0.137913	18	15	26878.7	0.834252	1	20	12	75754.8	0.0654929	0.598523	19	13.6167	38341.8	46375.1	1.20952	67949	29667	37757	47737	9770	12638	9402	25737	45613	102446	133545	21415	12836	12157	5681	31933	37892.7	unknown1138	0.0065055	0.155371	18	15	10778.1	0.598467	1	20	12	23143	0.0254954	0.511734	19	13.6167
unknown542	0.0144977	0.137913	18	15	1032.2	0.91626	1	20	12	7077.75	0.0706854	0.598523	19	13.6167	6286.89	1602.06	0.254825	7214	6737	7327	7498	2647	5781	5525	5897	8301	6776	6074	7160	5820	6244	5237	6104	6271.38	unknown542	0.0144977	0.199677	18	15	954.241	0.194922	1	20	12	7254	0.0194111	0.511734	19	13.6167
TG 56:5 Isomer C	0.0144977	0.137913	24	15	613.062	0.537563	1	21.5648	12	3622.75	0.0456265	0.527997	22.7824	13.4583	2273.33	1557.32	0.685039	1305	1038	1168	1468	1213	1309	1755	2041	1826	4322	6862	1481	2185	1731	2002	4194	2243.75	TG 56:5 Isomer C	0.0210199	0.239541	24	18	1670.36	0.238822	1	24.4321	17.9999	6192.25	0.0315975	0.517839	24.2161	18.0014
unknown1046	0.0144977	0.137913	18	15	9354.32	0.892338	1	20	12	22164	0.0691821	0.598523	19	13.6167	11457.2	13917.2	1.21471	22519	9226	10461	16244	2485	3300	2612	7774	14946	29744	37930	6036	3344	2807	1965	9766	11322.4	unknown1046	0.0210199	0.239541	18	15	3740.24	0.685286	1	20	12	7097.75	0.0754832	0.65697	19	13.6167
PC 40:5 Isomer B	0.0144977	0.137913	18	15	417.193	0.370834	1	20	12	2097.25	0.0334713	0.445726	19	13.6167	1113.95	1007.61	0.904539	869	716	800	1110	422	539	260	983	1201	2073	3867	1248	961	487	554	1577	1104.19	PC 40:5 Isomer B	0.0299489	0.256624	18	0	549.776	0.630978	1	20	12	2076	0.093895	0.680483	19	15.2
unknown431	0.0144977	0.137913	18	6	2430.68	0.985768	1	20	6	8411.75	0.0750026	0.598523	19	6.01667	6465.05	2307.96	0.35699	4383	4335	3642	4490	8767	7276	9033	8571	4197	6728	5422	1543	6656	7608	6302	10013	6185.38	unknown431	0.0299489	0.256624	18	6	1809.49	0.996094	1	20	6	7050.75	0.134607	0.756183	19	6.01667
unknown546	0.0144977	0.137913	18	6	3074.15	0.703747	1	20	5.99999	8204.5	0.0569833	0.557231	19	6.01666	5342.7	3293.22	0.616396	2926	1932	2517	2683	7749	6456	8777	9836	2728	3739	4444	2094	4477	5320	4250	9170	4943.62	unknown546	0.0299489	0.256624	18	6	1345.62	0.999783	1	20	6	4438.25	0.134995	0.756183	19	6.01667
unknown674	0.0144977	0.137913	24	12	2407.35	0.395818	1	21.0501	12	12014.8	0.0353522	0.44724	22.5251	12.0517	7272.99	4965.29	0.682703	4780	2361	2648	4393	5570	5479	8206	7797	5924	15201	20457	6477	3551	4392	4232	11299	7047.94	unknown674	0.0299489	0.256624	24	18	2741.1	0.291453	1	22.6735	17.9999	9100.5	0.0501127	0.585954	23.3368	18.0145
unknown1075	0.0144977	0.137913	18	15	623.315	0.99899	1	20	12	4559.75	0.0758156	0.598523	19	13.6167	3978.15	932.29	0.234352	4436	4719	4649	4114	3032	3732	3063	4095	5194	4559	3826	4660	3706	3231	3191	3299	3969.12	unknown1075	0.0299489	0.256624	18	15	521.845	0.980962	1	20	12	5017	0.133012	0.756183	19	13.6167
unknown1343	0.0144977	0.137913	18	15	5581.55	0.912542	1	20	12	17189.8	0.0704524	0.598523	19	13.6167	10770.5	8372.69	0.777376	14666	11605	9513	17489	6813	7720	4362	9160	9944	18811	22723	17281	4385	4152	3546	8860	10689.4	unknown1343	0.0299489	0.256624	18	15	9837.27	0.832125	1	20	12	22512.5	0.116931	0.746653	19	13.6167
unknown1541	0.0144977	0.137913	24	18	2994.95	0.468681	1	20	12	20199.8	0.0407118	0.482201	22	14.85	7191.55	13078.2	1.81855	2084	2664	1395	2082	1212	1665	883	2070	2978	24065	47865	5891	8017	2479	2240	9421	7313.19	unknown1541	0.0299489	0.256624	18	15	15056.6	0.524346	1	20	12	28156	0.0809343	0.671246	19	13.6167
unknown1576	0.0144977	0.137913	18	15	2116.55	0.838799	1	20	12	6944.5	0.0657837	0.598523	19	13.6167	4342.18	3245.75	0.747494	6102	4609	3706	6169	2955	3241	1878	3753	4101	7243	9251	7183	2000	1722	1424	3635	4310.75	unknown1576	0.0419656	0.277096	18	15	3772.41	0.941502	1	20	12	8973.5	0.167177	0.841424	19	13.6167
unknown1092	0.0144977	0.137913	18	15	1234.25	0.944731	1	20	12	6223.5	0.0724627	0.598523	19	13.6167	5172.26	1633.43	0.315806	6050	5747	5525	6186	4270	4031	3750	4662	6443	6781	6494	5176	4177	3877	3547	5787	5156.44	unknown1092	0.0499351	0.298155	18	15	1587.1	0.2499	1	20	12	6057.75	0.0671823	0.65697	19	13.6167
unknown786	0.0210199	0.163853	18	15	1496.95	0.993414	1	20	12	6514	0.10167	0.683378	19	13.6167	5094.78	2172.09	0.426337	6555	5759	5445	6787	4227	3844	2982	4741	6647	8038	6031	5340	3821	3130	2810	5023	5073.75	unknown786	0.000171384	0.0611596	18	15	1348.28	0.216697	1	20	12	4918	0.000415982	0.302705	19	13.6167
unknown1657	0.0210199	0.163853	18	15	19268.7	0.921559	1	20	12	51103.5	0.09577	0.678766	19	13.6167	24883.6	33132.3	1.33149	44782	31493	17106	33443	6456	6492	4772	15309	15631	62004	103174	23605	8547	2988	3656	13546	24562.8	unknown1657	0.000171384	0.0611596	18	15	17344.4	0.528316	1	20	12	31144.8	0.000933489	0.302705	19	13.6167
unknown861	0.0210199	0.163853	18	15	2286.78	0.959109	1	20	12	5735.5	0.0988671	0.678766	19	13.6167	3567.3	3096.36	0.867985	6400	3537	4024	4896	1525	1683	1618	2781	4888	7099	8238	2717	1704	1357	1330	2800	3537.31	unknown861	0.000320124	0.0611596	18	15	1406.79	0.501157	1	20	12	3246.5	0.00156223	0.302705	19	13.6167
unknown758	0.0210199	0.163853	18	15	5974.88	0.903432	1	20	12	19096.5	0.0942635	0.678766	19	13.6167	11154.9	10235.2	0.917551	17163	10699	11832	14302	4282	5713	4608	8991	12801	24598	31616	7371	5433	4414	3420	9650	11055.8	unknown758	0.000987235	0.0714949	18	15	3706.3	0.418196	1	20	12	8852.25	0.00363001	0.302705	19	13.6167
HexCer 35:2;3O|HexCer 16:1;2O/19:1;O	0.0210199	0.163853	18	15	13078.1	0.941331	1	20	12	33626.5	0.0974047	0.678766	19	13.6167	20450.2	18411.6	0.900312	33223	21195	23464	29506	8461	11057	7931	15602	27058	43440	48221	15787	10896	7889	6140	14481	20271.9	HexCer 35:2;3O|HexCer 16:1;2O/19:1;O	0.00164724	0.0821791	18	15	9072.18	0.511534	1	20	12	19867.2	0.00680752	0.362406	19	13.6167
unknown946	0.0210199	0.163853	18	15	2665.62	0.895534	1	20	12	7963.75	0.0936046	0.678766	19	13.6167	5048.93	3968.63	0.786033	7434	5098	5227	7273	2471	2968	1285	5074	8792	8622	10128	4313	2413	1911	1905	5254	5010.5	unknown946	0.00164724	0.0821791	18	15	2271.58	0.181515	1	20	12	5274.5	0.00272539	0.302705	19	13.6167
unknown1080	0.0210199	0.163853	18	15	9532.86	0.951932	1	20	12	21659	0.0982775	0.678766	19	13.6167	12080.5	13244.6	1.09637	19434	13142	12171	20273	3951	4754	3597	7151	15817	29451	36147	5221	5407	3629	2769	8321	11952.2	unknown1080	0.00267199	0.107118	18	15	4770.67	0.42425	1	20	12	10739.5	0.00882203	0.398658	19	13.6167
unknown1082	0.0210199	0.163853	18	15	5937.05	0.900532	1	20	12	16414.5	0.0940217	0.678766	19	13.6167	9252.1	9374.66	1.01325	15187	9108	10971	12223	4136	4695	3847	6167	13154	19383	26205	6916	3592	2680	2143	6174	9161.31	unknown1082	0.00421867	0.13726	18	15	3520.33	0.349622	1	20	12	7287.5	0.0110903	0.398658	19	13.6167
PC O-36:1|PC O-18:0_18:1	0.0210199	0.163853	18	15	3311.03	0.992098	1	20	12	9002	0.101562	0.683378	19	13.6167	6256.72	4527.18	0.723572	10032	9425	6832	7826	2933	3378	2256	5243	6580	9497	13883	6048	4358	3218	1404	6493	6212.88	PC O-36:1|PC O-18:0_18:1	0.0065055	0.155371	18	15	2679.76	0.699284	1	20	12	6151.25	0.0290821	0.515656	19	13.6167
unknown875	0.0210199	0.163853	24	15	932.32	0.606138	1	25.8651	12	4095.25	0.0683289	0.598523	24.9326	13.5751	3087.24	941.501	0.304965	2341	1571	2040	1677	2642	2176	2008	3289	2632	4530	5327	3892	2109	2476	3250	7697	3103.56	unknown875	0.0065055	0.155371	24	18	1019.47	0.210992	1	24.5682	17.9999	4831.24	0.0104195	0.398658	24.2841	18.0024
unknown745	0.0210199	0.163853	18	15	7605.29	0.832259	1	20	12	22811.8	0.0882728	0.665008	19	13.6167	12565.6	12722.5	1.01249	18626	10487	13116	17204	5812	5932	4704	8531	16275	26416	39785	8771	4947	4935	3999	9538	12442.4	unknown745	0.00980952	0.174781	18	15	4609.63	0.329105	1	20	12	10175.2	0.0217455	0.511734	19	13.6167
unknown1013	0.0210199	0.163853	18	15	4689.89	0.786988	1	20	12	13691	0.0843964	0.646655	19	13.6167	6943.96	8244.23	1.18725	10425	5536	7364	9663	2299	2268	2482	4567	9349	15440	24896	5079	2448	2020	1844	4146	6864.12	unknown1013	0.00980952	0.174781	18	15	2194.15	0.870745	1	20	12	5008	0.0492236	0.581653	19	13.6167
unknown947	0.0210199	0.163853	18	15	2593.67	0.924172	1	20	12	8613.25	0.0959865	0.678766	19	13.6167	5559.91	4075.58	0.733031	8103	5095	6063	7504	2350	3881	2273	5197	7076	10141	13068	4168	3497	2869	2291	4751	5520.44	unknown947	0.0144977	0.199677	18	15	1621.4	0.202568	1	20	12	4643	0.0200595	0.511734	19	13.6167
unknown1106	0.0210199	0.163853	18	15	4941.97	0.876975	1	20	12	13089.5	0.0920509	0.678766	19	13.6167	7517.78	7321.72	0.97392	12209	7249	8520	9766	3665	3778	2280	5341	10888	16200	20075	5195	3006	2642	1929	6407	7446.88	unknown1106	0.0144977	0.199677	18	15	2520.84	0.674338	1	20	12	5357.75	0.0550193	0.609827	19	13.6167
unknown1121	0.0210199	0.163853	18	15	9316.13	0.85139	1	20	12	25363.2	0.0898952	0.670481	19	13.6167	14276.6	14365.6	1.00624	23032	12430	17259	17853	5481	7039	4611	10226	21477	31356	39634	8986	5659	4765	3794	12597	14137.4	unknown1121	0.0144977	0.199677	18	15	4826.53	0.651969	1	20	12	9490.5	0.0535131	0.601055	19	13.6167
unknown1120	0.0210199	0.163853	24	18	2559.73	0.264681	1	20	12	8838.25	0.0344469	0.447199	22	14.85	4843.2	4971.99	1.02659	2835	3684	2438	3532	1263	1883	1203	2801	3820	10002	15909	5622	7826	2920	3189	9304	4889.44	unknown1120	0.0299489	0.256624	18	15	4386.54	0.901214	1	20	12	11576.8	0.124487	0.756183	19	13.6167
unknown1199	0.0210199	0.163853	24	15	1094.78	0.45025	1	21.0501	12	7695.25	0.0535696	0.546654	22.5251	13.4595	4461.22	3904.66	0.875246	2616	1720	1387	2579	3120	3148	3322	3897	4149	9629	14435	2568	3760	2932	3522	7216	4375	unknown1199	0.0299489	0.256624	24	18	4231.68	0.406491	1	21.4599	17.9999	12076	0.0658423	0.65697	22.7299	18.0563
unknown979	0.0210199	0.163853	24	15	2073.77	0.484348	1	24.9858	12	9122.75	0.0568833	0.557231	24.4929	13.5357	6371.2	3077.73	0.483068	3495	3362	2641	4013	4746	4989	6688	6214	4232	11360	15823	5076	8746	5011	5600	10386	6398.88	unknown979	0.0419656	0.277096	24	18	6240.57	0.239455	1	21.4599	12	19603.2	0.0562767	0.616903	22.7299	14.8788
PI O-36:3	0.0299489	0.204986	18	15	8046.88	0.9977	1	20	12	14539.5	0.134776	0.787253	19	13.6167	8421.89	10256.9	1.21789	15608	14644	10616	15147	1643	2106	1268	4263	10860	17879	25757	3662	3261	1384	974	4089	8322.56	PI O-36:3	0.000320124	0.0611596	18	15	4229.91	0.775987	1	20	12	7751.5	0.00231034	0.302705	19	13.6167
unknown1353	0.0299489	0.204986	18	15	2823.12	0.997904	1	20	12	6136.5	0.134797	0.787253	19	13.6167	4044.13	3660.22	0.905068	7363	6546	5206	5716	1504	1763	1174	2919	4555	7212	9054	3725	2552	1335	902	2613	4008.69	unknown1353	0.000320124	0.0611596	18	15	2257.79	0.694237	1	20	12	4460.5	0.00209169	0.302705	19	13.6167
unknown1414	0.0299489	0.204986	18	15	27863.9	0.998392	1	20	12	68775	0.134849	0.787253	19	13.6167	46492.8	38191.4	0.821448	77926	73110	63859	58998	18217	24347	13765	39377	55315	74249	103905	41631	28834	15718	10704	38012	46122.9	unknown1414	0.000320124	0.0611596	18	15	17701	0.708133	1	20	12	39556	0.00212906	0.302705	19	13.6167
unknown1495	0.0299489	0.204986	18	15	14049	0.997746	1	20	12	31141.8	0.134781	0.787253	19	13.6167	19500.4	19564.1	1.00327	36149	30536	26957	28950	7340	7222	5223	13727	24983	33930	46851	18803	7809	5400	3686	11409	19310.9	unknown1495	0.000572095	0.0611596	18	15	9787.06	0.844857	1	20	12	18823.2	0.00417352	0.302705	19	13.6167
unknown1525	0.0299489	0.204986	18	15	36477	0.998036	1	20	12	83833	0.134811	0.787253	19	13.6167	53703.7	50939.9	0.948537	97205	85469	70409	79076	22040	21816	15940	38809	69480	89410	124455	51987	23441	16362	11526	33941	53210.4	unknown1525	0.000572095	0.0611596	18	15	27084.8	0.827369	1	20	12	52498.2	0.00409704	0.302705	19	13.6167
unknown1463	0.0299489	0.204986	18	15	9963.84	0.995827	1	20	12	21617.8	0.134579	0.787253	19	13.6167	13622.8	13437.9	0.986429	24563	20987	19543	19511	5074	5436	3647	9164	17980	23082	32092	13317	6208	3942	2443	8893	13492.6	unknown1463	0.000987235	0.0714949	18	15	6883.68	0.872703	1	20	12	12979.5	0.00694141	0.362406	19	13.6167
unknown967	0.0299489	0.204986	18	15	11664.3	0.888215	1	20	12	32941.5	0.123078	0.773464	19	13.6167	17774.1	19589.4	1.10213	30529	15484	21073	23967	7270	7769	6825	11019	23369	40974	54219	13204	4963	4908	4052	11725	17584.4	unknown967	0.00267199	0.107118	18	15	6783.98	0.393184	1	20	12	14392.5	0.00825593	0.394352	19	13.6167
unknown1640	0.0299489	0.204986	18	15	4164.33	0.82935	1	20	12	9768.5	0.116624	0.751586	19	13.6167	5176.98	5955.05	1.15029	8907	4377	4712	7475	2045	2075	1544	1711	6773	14031	15696	2574	2037	1591	1318	5043	5119.31	unknown1640	0.00421867	0.13726	18	15	1687.16	0.735124	1	20	12	3823	0.0210139	0.511734	19	13.6167
Cer 26:2;2O|Cer 14:2;2O/12:0	0.0299489	0.204986	18	15	2735.44	0.997256	1	20	12	5692.5	0.134729	0.787253	19	13.6167	3390.93	3645.75	1.07515	7719	5129	3978	4038	870	634	998	2917	5325	6695	8854	1896	1538	592	410	2097	3355.62	Cer 26:2;2O|Cer 14:2;2O/12:0	0.0065055	0.155371	18	15	1059.07	0.986387	1	20	12	1992.75	0.0388148	0.542617	19	13.6167
unknown1287	0.0299489	0.204986	18	15	3275.67	0.835682	1	20	12	10926	0.117325	0.752553	19	13.6167	6741.12	5323.36	0.789686	9226	6349	7745	8583	3509	3582	4017	5539	9691	12106	16532	5375	3437	3012	2780	5550	6689.56	unknown1287	0.0065055	0.155371	18	15	2104.7	0.212369	1	20	12	6056.25	0.0104785	0.398658	19	13.6167
PC P-36:1 or PC O-36:2 A	0.0299489	0.204986	18	15	136978	0.882965	1	20	12	368677	0.122507	0.772553	19	13.6167	191787	222488	1.16008	361889	154751	174413	247736	58281	70210	51440	135267	235989	495164	638509	105045	64501	55055	25773	160099	189633	PC P-36:1 or PC O-36:2 A	0.00980952	0.174781	18	15	60077.9	0.519664	1	20	12	120710	0.0320081	0.517839	19	13.6167
PC P-38:2 or PC O-38:3	0.0299489	0.204986	18	15	50099.9	0.847979	1	20	12	132756	0.11868	0.754175	19	13.6167	69734.2	78898.2	1.13141	129807	56046	65693	84777	20465	25284	19269	52526	95998	175345	220007	39675	21489	19943	10716	66482	68970.1	PC P-38:2 or PC O-38:3	0.00980952	0.174781	18	15	21826.3	0.641195	1	20	12	45405	0.0381718	0.542617	19	13.6167
unknown908	0.0299489	0.204986	18	15	3613.85	0.789707	1	20	12	10810.8	0.112208	0.725958	19	13.6167	6383.12	5595.12	0.876549	10587	4914	6200	8281	2762	3926	1711	5715	10358	12968	14818	5099	2746	2189	2381	6608	6328.94	unknown908	0.00980952	0.174781	18	15	2140.94	0.427915	1	20	12	5427.25	0.0271723	0.511734	19	13.6167
Cer 28:2;2O|Cer 16:2;2O/12:0	0.0299489	0.204986	18	15	4927.83	0.998875	1	20	12	11403.2	0.134899	0.787253	19	13.6167	6836.81	7053.6	1.03171	15217	11054	7985	7084	2081	1287	1835	7370	9319	13151	18603	4540	2515	1357	1170	3728	6768.5	Cer 28:2;2O|Cer 16:2;2O/12:0	0.0144977	0.199677	18	15	1611.5	0.988291	1	20	12	3123.75	0.0751579	0.65697	19	13.6167
unknown960	0.0299489	0.204986	18	15	5820.2	0.901257	1	20	12	17043	0.124492	0.774194	19	13.6167	10674	8539.87	0.800061	15878	10117	12541	13931	4928	5921	5479	8524	14714	20838	24950	7670	4926	5346	4297	9401	10591.3	unknown960	0.0144977	0.199677	18	15	3613.85	0.510606	1	20	12	8743.25	0.0437193	0.557669	19	13.6167
unknown1213	0.0299489	0.204986	18	15	1957.8	0.991061	1	20	12	6005.5	0.134077	0.787253	19	13.6167	4330.92	2508.66	0.579244	6187	4615	5571	5667	2992	2801	2597	3881	6888	6263	6995	3876	2591	2163	2079	3740	4306.62	unknown1213	0.0144977	0.199677	18	15	1244.86	0.316471	1	20	12	3488.25	0.0292918	0.515656	19	13.6167
unknown1261	0.0299489	0.204986	18	15	3004.5	0.737401	1	20	12	9487	0.10629	0.701824	19	13.6167	4267.89	5990.61	1.40365	6590	2896	3680	5157	796	1317	954	2470	5472	12466	18257	1753	746	1078	552	3174	4209.88	unknown1261	0.0144977	0.199677	18	15	1211.27	0.750341	1	20	12	2058.25	0.0600586	0.621344	19	13.6167
unknown1119	0.0299489	0.204986	18	15	5037.43	0.787847	1	20	12	17080	0.112	0.725958	19	13.6167	9425.76	9152.73	0.971033	13132	7847	9952	11447	3857	4511	3923	7813	12339	20093	29443	6445	4351	3554	2319	8368	9337.12	unknown1119	0.0210199	0.239541	18	15	2763.2	0.682607	1	20	12	6600.5	0.0752443	0.65697	19	13.6167
unknown1484	0.0299489	0.204986	18	6	1307.44	0.984946	1	20	6	6131	0.133433	0.787253	19	6.01667	5021.18	1261.46	0.251228	4548	4249	3525	3395	6198	5119	5413	7794	3426	3700	5456	3008	5459	4817	4228	7558	4868.31	unknown1484	0.0210199	0.239541	18	6	883.53	0.999986	1	20	6	4366.25	0.102204	0.704773	19	6.01667
PE 38:3|PE 20:0_18:3	0.0299489	0.204986	18	6	403.758	0.963803	1	20	6	1385.25	0.131195	0.787253	19	6.01667	1012.08	407.568	0.402704	1055	764	488	502	1400	964	1265	1912	483	742	950	342	947	989	661	1939	962.688	PE 38:3|PE 20:0_18:3	0.0359573	0.277096	18	6	336.583	0.99313	1	20	6	826.75	0.154708	0.805846	19	6.01667
HexCer 34:0;2O	0.0299489	0.204986	18	6	311.834	0.999907	1	20	6.00001	1068.5	0.135008	0.787253	19	6.01667	834.047	299.529	0.359127	548	463	445	507	1009	849	974	1442	471	699	882	413	764	950	820	1528	797.75	HexCer 34:0;2O	0.0419656	0.277096	18	6	244.659	0.999975	1	28	5.99999	841.75	0.175031	0.841424	23	6.29761
LPC 15:0	0.0299489	0.204986	18	15	798.324	0.13788	1	20	12	3351.5	0.026798	0.393213	19	13.6167	1556.13	1665.42	1.07023	1478	694	542	967	917	356	342	1476	1694	3363	5100	3249	453	393	1054	2562	1540	LPC 15:0	0.0419656	0.277096	24	18	837.745	0.520717	1	20.6557	17.9999	2693.25	0.105403	0.706358	22.3279	18.1015
unknown341	0.0299489	0.204986	24	15	4162.91	0.578493	1	20.7529	12	35884.8	0.0875893	0.662081	22.3765	13.462	19255	20154.7	1.04673	8309	5666	6310	10019	11333	10866	14847	15943	12747	44668	75352	10772	16656	10860	11641	34460	18778.1	unknown341	0.0419656	0.277096	24	18	16932.7	0.488226	1	23.1496	17.9999	47584.7	0.100146	0.702589	23.5748	18.0058
unknown1317	0.0299489	0.204986	18	15	2874.04	0.831289	1	20	12	9182	0.116839	0.751586	19	13.6167	5514.06	4562.09	0.827356	8288	5283	4902	6321	3142	2940	2235	3968	7115	11427	14961	3225	3522	2887	1484	5818	5469.88	unknown1317	0.0419656	0.277096	18	15	1385.93	0.425122	1	20	12	4271.5	0.0896714	0.671246	19	13.6167
Cer 36:1;4O|Cer 21:0;3O/15:1;(2OH)	0.0419656	0.24924	18	15	14239	0.995344	1	20	12	32071.8	0.174414	0.901267	19	13.6167	19108.4	20758.9	1.08638	34269	30624	26293	28049	6199	6514	4569	12796	22154	32976	54053	19104	7086	4023	3148	10661	18907.4	Cer 36:1;4O|Cer 21:0;3O/15:1;(2OH)	0.000572095	0.0611596	18	15	10112.3	0.877265	1	20	12	18273.8	0.00431473	0.302705	19	13.6167
FA 13:0 (tridecylic acid)	0.0419656	0.24924	18	15	3420.98	0.910337	1	20	12	10544.5	0.162929	0.892136	19	13.6167	6057.02	5829.27	0.9624	10128	7121	5511	6656	3348	2448	2085	3839	5463	12182	19095	5438	3990	1437	1450	5818	6000.56	FA 13:0 (tridecylic acid)	0.000572095	0.0611596	18	15	6261.61	0.860085	1	20	12	12277.5	0.00423996	0.302705	19	13.6167
FA 15:0 (pentadecylic acid)	0.0419656	0.24924	18	15	3689.68	0.999767	1	20	12	11735.8	0.175004	0.901267	19	13.6167	9110.96	4533.04	0.497537	11978	11535	12355	11192	6246	5719	6186	7590	8537	12884	17643	7879	8674	4948	3561	8146	9067.06	FA 15:0 (pentadecylic acid)	0.000572095	0.0611596	18	15	5204.48	0.349181	1	20	12	14436.8	0.00190143	0.302705	19	13.6167
PC O-38:2|PC O-20:1_18:1	0.0419656	0.24924	18	15	686.954	0.998695	1	20	12	1983.5	0.174861	0.901267	19	13.6167	1468.42	895.184	0.609624	2596	2070	1423	1755	762	821	655	1342	1374	2201	3026	1333	1118	855	381	1644	1459.75	PC O-38:2|PC O-20:1_18:1	0.00421867	0.13726	18	15	623.668	0.815805	1	20	12	1486	0.0229618	0.511734	19	13.6167
unknown622	0.0419656	0.24924	18	6	2002	0.999313	1	28	6	4657.5	0.174943	0.901267	23	6.29762	3341.08	613.765	0.183702	1442	809	910	1431	5246	4455	5311	3618	1201	1724	1719	550	4152	4496	4974	11081	3319.94	unknown622	0.0065055	0.155371	18	6	2621.6	0.937737	1	20	6	6455.75	0.037209	0.542617	19	6.01667
LPC 18:3	0.0419656	0.24924	24	12	1724.46	0.198177	1	20	12	10402.5	0.048149	0.53398	22	12.1	5207.33	4921.35	0.94508	2881	1864	1268	2338	3882	1964	2022	4744	3990	11874	17391	8355	1996	1702	3331	9070	4917	LPC 18:3	0.00980952	0.174781	24	18	2564.85	0.158172	1	26.9725	18	8958.74	0.011588	0.398658	25.4862	18.0614
unknown1084	0.0419656	0.24924	18	15	14394.9	0.904443	1	20	12	39037	0.162121	0.88988	19	13.6167	21344	22915.7	1.07364	34951	19791	25730	28177	7873	8905	7766	15545	29573	48917	64742	12916	7176	5756	3872	16264	21122.1	unknown1084	0.00980952	0.174781	18	15	7378.31	0.644795	1	20	12	14953.5	0.0383507	0.542617	19	13.6167
unknown1705	0.0419656	0.24924	18	15	3425.93	0.999287	1	20	12	5339.5	0.17494	0.901267	19	13.6167	2918.8	4683.92	1.60474	8179	6323	3941	6174	0	0	0	0	4306	5163	8119	3770	0	0	0	0	2873.44	unknown1705	0.00980952	0.174781	18	15	2015.96	0.999333	1	20	12	2313.25	0.0551425	0.609827	19	13.6167
LPC 14:1/0:0	0.0419656	0.24924	24	15	6153.6	0.301919	1	20.464	12	25415.8	0.06802	0.598523	22.232	13.4659	12354.1	15969.5	1.29265	4586	3288	2138	4481	10345	4357	3882	12393	8423	30468	45173	17599	4864	3359	8878	27034	11954.2	LPC 14:1/0:0	0.0144977	0.199677	24	21	3536.59	0.232478	1	27.3065	17.9999	15486.7	0.0225572	0.511734	25.6533	19.6784
LPC P-16:0 or LPC O-16:1	0.0419656	0.24924	24	15	1304.61	0.215662	1	20	12	8426	0.0516319	0.543549	22	13.475	3443.78	6452.47	1.87366	1612	182	1028	1401	1649	1361	721	2486	3160	10435	16006	4103	1030	915	1915	4320	3270.25	LPC P-16:0 or LPC O-16:1	0.0299489	0.256624	24	18	1830.52	0.320991	1	22.6735	17.9999	6891.24	0.0542635	0.606077	23.3368	18.0145
unknown986	0.0419656	0.24924	18	15	56298.1	0.862601	1	20	12	180445	0.156335	0.868744	19	13.6167	100611	98197.3	0.976012	160169	81963	94170	125734	40170	43706	35269	82600	116935	225212	315646	63987	43410	42023	17699	105863	99659.8	unknown986	0.0299489	0.256624	18	15	34308.5	0.39121	1	20	12	76900	0.0638161	0.645563	19	13.6167
unknown1507	0.0419656	0.24924	18	15	2667.38	0.937688	1	20	12	9821.5	0.166659	0.901267	19	13.6167	5842.32	4957.27	0.848511	9482	6923	4833	6898	3014	2201	2402	7163	7178	10723	16113	5272	2902	1723	1275	4607	5794.31	unknown1507	0.0299489	0.256624	18	15	1596.82	0.994961	1	20	12	3993.75	0.134488	0.756183	19	13.6167
unknown1521	0.0419656	0.24924	18	15	36107.7	0.999098	1	20	12	108114	0.174914	0.901267	19	13.6167	76567.1	50174.7	0.655304	119123	104493	88381	97351	46149	46515	33123	70148	83478	121530	166559	60888	47865	30948	23503	77245	76081.2	unknown1521	0.0299489	0.256624	18	15	24547.9	0.522164	1	20	12	64886	0.0806627	0.671246	19	13.6167
unknown1101	0.0419656	0.24924	18	15	5216.5	0.940981	1	20	12	17562.5	0.167106	0.901267	19	13.6167	10537.5	8803.56	0.83545	16436	9904	10948	13027	5645	5820	5664	9000	13065	22239	28581	6365	3782	4273	2643	9844	10452.2	unknown1101	0.0419656	0.277096	18	15	3145.39	0.46017	1	20	12	7260.75	0.0955342	0.682303	19	13.6167
unknown1605	0.0419656	0.24924	24	18	2227.74	0.42511	1	20	12	17142.2	0.0896693	0.670481	22	14.85	5997.6	11191.8	1.86605	2094	1997	1239	1952	979	1335	992	1719	2568	23326	38114	4561	5539	2052	1676	7484	6101.69	unknown1605	0.0419656	0.277096	18	15	8942.07	0.657725	1	20	12	18221	0.126689	0.756183	19	13.6167
unknown1635	0.0499351	0.294237	18	6	3744.84	0.999703	1	28	6	11705.8	0.199548	0.990139	23	6.29762	7068.85	2127.2	0.300926	0	0	19	0	16542	12086	12899	5296	0	15	31	15	11723	10794	12175	30334	6995.56	unknown1635	0.0065055	0.155371	18	6	8280.22	0.832467	1	20	6	17761.2	0.0336768	0.517839	19	6.01667
unknown1248	0.0499351	0.294237	24	15	207.182	0.400329	1	20.1831	12	1456	0.0982031	0.678766	22.0915	13.4709	569.459	1075.89	1.88932	0	0	0	134	57	0	0	293	158	1128	2735	1803	0	78	97	2177	541.25	unknown1248	0.0499351	0.298155	24	18	924.012	0.357401	1	27.1385	17.9999	3168.74	0.0896969	0.671246	25.5692	18.068
[truncated: 20 more columns]

## Sheet: 0.5 cycling in proteinAM
ID	CycID	JTK_pvalue	JTK_BH.Q	JTK_period	JTK_adjphase	JTK_amplitude	LS_pvalue	LS_BH.Q	LS_period	LS_adjphase	LS_amplitude	meta2d_pvalue	meta2d_BH.Q	meta2d_period	meta2d_phase	meta2d_Base	meta2d_AMP	meta2d_rAMP	0	0	0	0	6	6	6	6	12	12	12	12	18	18	18	18	ProteinM
302	PC 38:5 Isomer B	8.77e-05	0.0554086	18	15	983.586	0.2288	1	20	12	5998.25	0.000237082	0.218089	19	13.6167	4795.49	1470.76	0.306696	4745	4870	5394	4662	3899	4260	4149	3467	5631	5966	5560	6836	3983	3816	4731	4531	4781.25
1057	unknown1488	8.77e-05	0.0554086	24	3	1980.96	0.0489697	1	24.7059	5.91e-05	7433.24	5.74e-05	0.128779	24.3529	1.52209	5189.34	2444.72	0.471104	9010	7569	6410	6744	4796	6306	6106	5585	4658	2394	2633	2680	4085	4808	2774	6248	5175.38
2243	unknown997	8.77e-05	0.0554086	24	15	3887.67	0.286729	1	21.3559	12	13881.5	0.000291434	0.218089	22.678	13.4583	7703.75	7103.85	0.922129	3209	3625	2575	3543	3901	4049	3804	4352	4728	15084	26669	9045	12428	5365	6028	12548	7559.56
41	Cer 35:1;2O|Cer 14:1;2O/21:0	0.000171384	0.0554086	18	6	2369.51	0.557416	1	20	6	6709.5	0.000979783	0.21957	19	6.01667	4681.34	2209.77	0.472037	3351	3374	2590	2800	6355	5870	6778	7835	2408	2550	3483	2278	5371	4885	3765	6924	4413.56
1209	unknown1624	0.000171384	0.0554086	24	15	11841.2	0.430325	1	20	12	127726	0.000775478	0.21957	22	13.475	42662.2	110698	2.59477	3785	5043	2096	5002	9273	8221	4685	6616	9422	154118	306240	41126	20652	8065	13192	37424	39685
48	Cer 36:1;2O|Cer 14:1;2O/22:0	0.000320124	0.0554086	18	6	10277.6	0.521903	1	20	6	26017.5	0.00162013	0.21957	19	6.01667	17054.6	9653.96	0.566061	15515	9008	8183	7926	23223	22086	27397	31364	7487	8571	12207	4971	18352	17229	14061	26576	15884.8
598	unknown1074	0.000320124	0.0554086	24	15	9859.72	0.403783	1	22.1053	12	42324	0.00128662	0.21957	23.0526	13.4611	24463.1	19861.9	0.81191	9861	10331	8605	11248	13299	13733	13831	15864	14746	44678	86154	23718	39324	17219	19034	44893	24158.6
640	unknown1111	0.000320124	0.0554086	24	15	14666.8	0.291048	1	23.1496	12	49997.5	0.000957902	0.21957	23.5748	13.4773	30757.6	20169.4	0.655753	11875	14142	11123	14709	18158	21061	19169	19628	20524	53634	94208	31624	52848	23192	29299	54579	30610.8
718	unknown1182	0.000320124	0.0554086	24	15	1680.97	0.469653	1	21.1511	12	9559.5	0.00147379	0.21957	22.5755	13.4589	5435.59	4824.69	0.887612	2508	2468	1978	2889	3043	3187	3130	3767	3320	11142	19399	4377	7498	3720	3876	9007	5331.81
1323	unknown1727	0.000320124	0.0554086	24	15	1715.79	0.476255	1	20	12	30488	0.00149238	0.21957	22	13.475	9673.85	27384	2.83073	648	953	271	820	1158	2055	1302	1549	1520	35670	75866	8896	3039	1461	2013	5777	8937.38
644	unknown1115	0.000446109	0.0554086	18	6	3286.28	0.842585	1	20	6	5702	0.0033402	0.21957	19	6.01667	3343.16	2712.67	0.811409	959	911	778	861	5737	5216	5719	6136	591	858	959	546	4801	4181	3666	6312	3014.44
34	Cer 34:1;3O|Cer 14:1;2O/20:0;(2OH)	0.000572095	0.0554086	18	6	71070.8	0.849499	1	20	6	121062	0.00419379	0.21957	19	6.01667	68423	60753.2	0.887905	13563	13197	11991	12826	117708	109270	119086	138186	9030	13184	17073	8469	93128	84644	78167	137453	61060.9
557	unknown1037	0.000572095	0.0554086	24	15	9609.23	0.315265	1	23.1496	12	32886.5	0.00173518	0.21957	23.5748	13.4773	20046.6	13658.1	0.68132	7867	8791	6667	9388	11531	13053	13876	13657	12981	36046	62304	20215	35211	14670	18036	34862	19947.2
677	unknown1145	0.000572095	0.0554086	24	15	28020.2	0.441894	1	21.995	12	129792	0.00234676	0.21957	22.9975	13.4602	77750.2	58744.8	0.755558	35480	36748	31281	38729	44225	48927	51677	57202	50808	136965	259801	71595	118319	52734	61682	132689	76803.9
843	unknown1295	0.000572095	0.0554086	18	6	98236.8	0.904579	1	20	6	171767	0.0044332	0.21957	19	6.01667	102092	81061.1	0.794001	28446	26205	22583	25255	168407	157210	165591	195859	17847	24829	33039	15989	142685	133171	116839	202348	92268.9
1438	unknown271	0.000572095	0.0554086	24	15	2267.69	0.381571	1	21.3559	12	14771.8	0.00205845	0.21957	22.678	13.4583	8846.36	7038.77	0.795668	4391	3218	4221	5579	5915	6629	6656	6838	7257	18108	26209	7513	8504	5641	6809	15768	8703.5
1942	unknown725	0.000572095	0.0554086	18	6	2129.45	0.541091	1	20	6	8303	0.00281088	0.21957	19	6.01667	6125.46	2330.4	0.380445	5327	3590	4032	5111	6712	7576	9740	9184	4935	4163	4295	2920	5257	6577	5529	8541	5843.06
2031	unknown805	0.000572095	0.0554086	18	6	1616.09	0.744026	1	20	6	4114.75	0.00372952	0.21957	19	6.01667	2834.67	1434.66	0.506114	2361	1142	1312	1700	3840	3603	4526	4490	1829	1348	1560	976	3387	3186	3351	3962	2660.81
2139	unknown902	0.000572095	0.0554086	18	6	2096.22	0.693987	1	20	6	5449	0.00350634	0.21957	19	6.01667	3600.19	2079.05	0.577485	1897	1458	1944	2173	5897	4434	6139	5326	1722	2142	1780	1481	3453	4582	3566	5578	3348.25
2183	unknown942	0.000572095	0.0554086	18	6	1075.86	0.604475	1	20	6	3328	0.00310184	0.21957	19	6.01667	2280.69	1133.13	0.496835	1518	1297	1758	1276	3544	2721	3904	3143	1224	1658	954	1328	2225	2137	1714	3893	2143.38
2214	unknown970	0.000572095	0.0554086	24	15	3278.32	0.35844	1	22.9091	12	12162.5	0.00194649	0.21957	23.4545	13.4724	7281.79	5197.9	0.713821	2747	3079	2310	3526	3839	4444	4645	4836	4475	13106	23992	7077	12711	5267	6351	13336	7233.81
40	Cer 35:0;2O|Cer 14:0;2O/21:0	0.000987235	0.0554086	18	6	1352.34	0.692838	1	20	6	3761	0.00566864	0.21957	19	6.01667	2467.01	1425.16	0.577686	1590	1481	1137	1315	3772	2830	3435	5007	1023	1435	2100	745	2110	2522	1932	4275	2294.31
49	Cer 36:1;3O|Cer 14:1;2O/22:0;(2OH)	0.000987235	0.0554086	18	6	106861	0.697039	1	20	6	216124	0.00569885	0.21957	19	6.01667	128041	99269.8	0.775296	55195	42829	40545	41290	209527	182138	211571	261260	32116	46788	67516	24413	150254	140983	117175	232587	116012
56	Cer 36:4;4O|Cer 15:3;3O/21:1;(2OH)	0.000987235	0.0554086	18	6	38179.2	0.942777	1	20	6	67336	0.00742689	0.245197	19	6.01667	40118.4	32030.9	0.798409	9882	8724	7587	9015	67466	60160	66507	75211	6451	8895	11428	5882	58246	52379	49092	82865	36236.9
82	Cer 44:0;3O|Cer 18:0;3O/26:0	0.000987235	0.0554086	24	15	13140	0.238397	1	24.5682	12	51075	0.0022016	0.21957	24.2841	13.5194	35261.6	17539	0.497397	19807	21220	14250	19143	30136	27886	24802	38852	32399	48189	83850	39862	44592	28030	32902	59703	35351.4
597	unknown1073	0.000987235	0.0554086	24	15	1667.18	0.454216	1	22.2166	12	8639	0.00390562	0.21957	23.1083	13.4622	5202.15	3774.4	0.725546	2350	2642	1853	2733	2909	2880	3238	3479	2785	10147	17110	4514	8070	3709	4231	9707	5147.31
653	unknown1123	0.000987235	0.0554086	24	15	1013.46	0.498718	1	20.9501	12	7989.5	0.00424226	0.21957	22.4751	13.4602	4475.22	4193.78	0.937111	2210	1621	1756	2294	2473	2956	3158	3179	3443	9935	15613	2967	3830	3189	2651	8810	4380.31
690	unknown1157	0.000987235	0.0554086	18	6	34933.4	0.802264	1	20	6	75377.2	0.0064478	0.21957	19	6.01667	47745.5	31543.3	0.660654	24260	19575	17840	18835	75858	64872	72859	87920	15456	22007	30935	11812	59716	52274	44566	83985	43923.1
698	unknown1164	0.000987235	0.0554086	18	6	13661.8	0.779238	1	20	6	28533	0.00628514	0.21957	19	6.01667	17714.3	12308.3	0.694821	9715	6553	5857	6182	28922	24502	26600	34108	4530	7990	11616	4076	20578	19059	17640	31637	16222.8
714	unknown1179	0.000987235	0.0554086	18	6	92462.7	0.801436	1	20	6	196596	0.00644196	0.21957	19	6.01667	125078	81503.3	0.651617	64206	53971	49386	47871	195217	171924	188848	230394	39526	58335	78672	31529	157088	137133	120448	218682	115202
754	unknown1214	0.000987235	0.0554086	24	15	5391.69	0.450536	1	22.6735	12	23215.5	0.0038776	0.21957	23.3368	13.4682	14165.7	9754.85	0.688626	6267	6990	4817	7265	8200	8692	9189	9298	7392	27031	45963	12476	22139	9880	12446	26875	14057.5
825	unknown1279	0.000987235	0.0554086	24	18	6626.65	0.0700292	1	21.5648	12	13237	0.000731413	0.21957	22.7824	14.8822	7437.76	8218.02	1.1049	2994	4516	3142	4109	1357	2092	1288	3014	6422	13126	19710	13690	17010	6616	6967	13335	7461.75
1014	unknown1449	0.000987235	0.0554086	24	15	3068.84	0.431252	1	22.9091	12	12161	0.00373025	0.21957	23.4545	13.4724	7113.97	5420.33	0.761928	2568	2541	2363	2830	3870	4364	4224	4829	3927	13329	25033	6355	10986	5392	5470	14942	7063.94
1105	unknown1530	0.000987235	0.0554086	24	15	8851.56	0.436134	1	22.7907	12	34670	0.00376764	0.21957	23.3953	13.4702	20235.6	15722.8	0.77699	7357	7260	6585	8256	11564	12841	12239	14063	12143	36051	72512	17974	31042	15535	15841	39947	20075.6
1140	unknown1562	0.000987235	0.0554086	18	6	2872.27	0.429907	1	20	6	6059.75	0.00371994	0.21957	19	6.01667	3078.01	3251.42	1.05634	1035	589	586	751	4978	4510	6137	8614	426	1003	1338	305	2305	2607	1521	6239	2684
1223	unknown1637	0.000987235	0.0554086	24	3	802.743	0.06989	1	26.4865	4.47e-05	3721.5	0.000730096	0.21957	25.2432	1.57772	2725.43	903.14	0.331375	4616	3865	2961	3444	2740	3275	2864	2680	2349	1502	1812	2119	2229	2495	1464	2968	2711.44
1371	unknown210	0.000987235	0.0554086	24	15	2574.58	0.454924	1	21.4599	12	14950	0.00391102	0.21957	22.7299	13.4582	8471.28	7588.41	0.895781	4239	2955	2926	4027	4810	5162	5812	6361	6069	17483	30238	6010	9288	6449	6589	14736	8322.12
1499	unknown326	0.000987235	0.0554086	24	15	5178.14	0.455417	1	20.464	12	39860	0.00391476	0.21957	22.232	13.4659	20560.9	23451.8	1.1406	8827	5919	7071	10208	11187	10528	12916	13960	15489	50500	80861	12590	19620	11755	12539	35608	19973.6
1613	unknown429	0.000987235	0.0554086	18	15	25333.9	0.641454	1	20	12	58286.5	0.00529703	0.21957	19	13.6167	30337.6	35484.6	1.16966	52835	24985	31989	40237	10123	10016	10369	17666	54152	67667	83496	27831	10991	10262	8072	19212	29993.9
1699	unknown506	0.000987235	0.0554086	24	12	1391.59	0.0738346	1	20.0911	12	6946.75	0.000767301	0.21957	22.0456	12.0951	3977.02	3149.9	0.792024	1995	1839	1338	2240	3698	3404	2517	4387	2961	7585	8070	9171	2131	3280	3000	3099	3794.69
27	Cer 33:0;2O|Cer 14:0;2O/19:0	0.00164724	0.0626789	18	6	825.901	0.652697	1	20	6	2089.5	0.00842411	0.260918	19	6.01667	1284.63	898.015	0.699043	618	478	584	596	2192	1668	1742	2756	405	644	918	345	1237	1304	1084	2242	1175.81
89	Cer d33:1	0.00164724	0.0626789	18	6	2110.01	0.855609	1	20	6	4192	0.0106615	0.265798	19	6.01667	2615.23	1824.61	0.697686	934	1010	847	969	4133	3804	4212	4619	776	953	1187	900	3200	3128	2874	4760	2394.12
90	Cer d34:0	0.00164724	0.0626789	18	6	40298.9	0.937266	1	20	6	74784.2	0.0115383	0.266897	19	6.01667	45813.3	34142.4	0.745251	15689	12616	10233	11150	78475	66844	70689	83129	9717	13776	17241	9250	63982	60957	57035	86032	41675.9
343	PE 36:1|PE 18:0_18:1	0.00164724	0.0626789	18	6	120093	0.884753	1	20	6	317842	0.0109758	0.265798	19	6.01667	221372	110333	0.498408	152779	126510	110143	106858	305362	274975	316909	374120	97875	135448	181156	80505	247634	241030	190291	386432	208002
373	PE-Cer 36:1;2O|PE-Cer 18:0;2O/18:1	0.00164724	0.0626789	18	6	25545.6	0.840999	1	20	6	54058.2	0.0105033	0.265798	19	6.01667	33281	23777.5	0.714445	15637	12896	9604	10726	54838	45168	52116	64111	9600	13258	16661	8020	40658	34683	33275	65144	30399.7
591	unknown1068	0.00164724	0.0626789	18	6	12695.9	0.848481	1	20	6	25461.5	0.0105844	0.265798	19	6.01667	15465.3	11477.9	0.74217	6825	4612	4885	4591	25763	21615	26905	27563	3790	6291	8831	2567	16961	19490	13532	30970	14074.4
658	unknown1128	0.00164724	0.0626789	18	6	2409.11	0.816313	1	20	6	5474.25	0.0102351	0.265798	19	6.01667	3444.17	2325.39	0.675168	1615	1500	1222	1242	5352	4594	5393	6558	1192	1628	2189	815	4301	3785	3040	6172	3162.38
663	unknown1132	0.00164724	0.0626789	18	6	1692.64	0.863062	1	20	6	4585.75	0.010742	0.265798	19	6.01667	3196.7	1596.42	0.499396	2025	1804	1581	1777	4141	4155	4281	5766	1449	1980	2990	1450	3081	3300	2820	5452	3003.25
747	unknown1208	0.00164724	0.0626789	24	18	7473.77	0.0964207	1	21.0501	12	17325.2	0.00154821	0.21957	22.5251	14.8673	9512.43	10637	1.11822	4114	6322	3647	5921	1908	2735	1863	3904	8620	18320	27898	14463	18821	8030	7540	18863	9560.56
880	unknown1328	0.00164724	0.0626789	18	6	6552.05	0.910067	1	20	6	18257	0.0112476	0.265798	19	6.01667	12608.5	6478.41	0.513813	8934	6714	5419	6670	17995	14617	17620	22796	5340	8651	11786	3952	13725	12902	9353	22701	11823.4
909	unknown1354	0.00164724	0.0626789	24	18	4197.39	0.089934	1	21.7778	12	8570	0.00145437	0.21957	22.8889	14.8895	4885.99	5185.13	1.06122	1814	2703	1931	2979	1171	1512	968	1986	4107	9174	13169	7830	11091	4619	3798	9521	4898.31
914	unknown1359	0.00164724	0.0626789	18	6	9486.9	0.853984	1	20	6	21992.5	0.0106439	0.265798	19	6.01667	13943.8	9202.23	0.659951	8827	5449	3962	5038	19615	18037	21581	28737	4622	6430	8644	3050	18362	14899	13631	24375	12828.7
950	unknown1391	0.00164724	0.0626789	18	6	2197.86	0.877563	1	20	6	5890.5	0.0108984	0.265798	19	6.01667	4023.14	2140.53	0.532054	2287	2061	1894	2272	5832	4849	5647	7234	1707	2336	3151	1480	4281	4417	3659	7113	3763.75
1085	unknown1512	0.00164724	0.0626789	18	6	4494.72	0.955548	1	20	6	8882.5	0.0117329	0.266897	19	6.01667	5465.26	4040.06	0.739225	1855	1490	1279	1293	9055	7531	8245	10699	1181	1724	2204	971	7321	7349	6438	10976	4975.69
1166	unknown1586	0.00164724	0.0626789	24	3	3479.32	0.145037	1	22.5575	6.63e-05	12399.2	0.00223129	0.21957	23.2788	1.45496	8625.4	4710.77	0.54615	16688	11158	11901	9850	8664	9739	7413	13834	6800	3131	4854	2599	7265	6501	5359	13386	8696.38
1184	unknown1601	0.00164724	0.0626789	24	15	6676.68	0.372439	1	23.6461	12	24434.2	0.00515113	0.21957	23.8231	13.4896	15253.6	9670.04	0.633951	6569	6078	5342	7335	10159	10792	9096	12130	9293	26625	47163	14656	23959	11842	13429	29111	15223.7
1185	unknown1602	0.00164724	0.0626789	24	15	2624.78	0.479252	1	21.995	12	12106.8	0.00642938	0.21957	22.9975	13.4602	7862.2	4768.86	0.606555	4236	4664	3679	5137	5129	5237	4945	6926	5750	11985	22976	7716	11513	5383	6178	13112	7785.38
1246	unknown1658	0.00164724	0.0626789	24	15	3254.81	0.485074	1	21.8859	12	16746.8	0.00649783	0.21957	22.9429	13.4595	10605.3	6961.24	0.65639	5974	5900	4788	6266	6687	6668	7208	8739	6794	17875	32055	10263	15199	7450	7882	18059	10487.9
1654	unknown466	0.00164724	0.0626789	24	15	1155.41	0.413351	1	20.6557	12	7986.75	0.00564601	0.21957	22.3279	13.4632	4826.32	3805.6	0.78851	2730	2174	2366	3477	2686	3497	4135	3364	3997	9020	14798	4132	4131	3835	3811	7598	4734.44
2048	unknown820	0.00215962	0.0697515	24	15	735.037	0.479431	1	21.1511	12	5795	0.00815158	0.260918	22.5755	13.4589	3892.87	2205.37	0.566515	2254	2891	2306	2738	2815	2855	2434	2985	2985	7070	9968	3157	4021	2982	3477	6589	3845.44
88	Cer d32:1	0.00267199	0.0697515	18	6	10183	0.946204	1	20	6	21397	0.0176478	0.315528	19	6.01667	13409.9	9428.89	0.703129	6074	4015	3436	3817	19561	17941	21440	26646	3644	5484	9334	3125	16120	15234	13207	27199	12267.3
91	Cer d34:1	0.00267199	0.0697515	18	6	26764.7	0.862626	1	20	6	62996.5	0.0163021	0.304985	19	6.01667	41214.5	25203.9	0.611531	23247	14430	17008	18501	54677	55020	69461	72828	16987	23716	25063	12739	44401	46017	44473	71996	38160.2
162	GlcCerd14:14E/20:02OH	0.00267199	0.0697515	18	6	4087.08	0.976116	1	20	6	8842.75	0.0181245	0.317016	19	6.01667	5533.53	3941.67	0.712325	1641	1710	1499	1413	9191	7118	8490	10572	1293	1813	2236	1383	6879	7086	6383	12187	5055.88
411	PI 36:1	0.00267199	0.0697515	18	6	127106	0.834844	1	20	6	348632	0.0158501	0.304985	19	6.01667	240056	120475	0.501862	176691	143441	121339	134057	356460	294791	341220	402058	115050	161448	221928	31169	246482	241028	185712	434429	225456
504	TG 60:2	0.00267199	0.0697515	24	15	7229.11	0.491201	1	21.8859	12	42319.5	0.0100219	0.265798	22.9429	13.4595	24844.7	19273.7	0.77577	11582	9136	11984	11997	12100	13720	11960	16279	16753	49991	87056	15478	32420	19927	19610	52321	24519.6
602	unknown1078	0.00267199	0.0697515	24	18	2342.29	0.111788	1	25.5652	17.9999	5623.25	0.00272295	0.21957	24.7826	18.0179	3231.84	1115.19	0.345065	858	1779	1053	1641	995	1114	880	1596	1959	3698	5768	7455	9055	3303	3722	6413	3205.56
662	unknown1131	0.00267199	0.0697515	18	15	5650.49	0.301931	1	20	12	25340.5	0.00655287	0.21957	19	13.6167	12663.4	13150.5	1.03847	7454	9315	6955	10437	2560	3918	2813	5790	10918	27189	49006	14249	16009	5809	6566	21588	12536
687	unknown1154	0.00267199	0.0697515	24	18	3512.55	0.244231	1	21.8859	12	10067.8	0.00543901	0.21957	22.9429	14.8934	5556.42	5978.02	1.07588	2262	2579	1569	2981	1264	1637	1536	2576	3760	11305	19416	5790	10078	4951	4191	13211	5569.12
691	unknown1158	0.00267199	0.0697515	18	6	991.01	0.907131	1	20	6.00001	5271.75	0.0170212	0.31153	19	6.01667	4477	882.45	0.197107	3432	3886	3847	3738	6115	5480	4487	5005	4315	2650	2952	3710	5260	4921	5106	5017	4370.06
724	unknown1188	0.00267199	0.0697515	24	15	36215.7	0.405669	1	24.8451	12	124300	0.0084842	0.260918	24.4225	13.53	80378.2	45878.6	0.570784	29578	37684	26509	38576	58048	59485	65834	64099	42763	131969	241743	80726	111331	64971	79564	158808	80730.5
743	unknown1204	0.00267199	0.0697515	24	18	6640.09	0.0978787	1	25.8651	17.9999	15248.2	0.00241889	0.21957	24.9326	18.0252	8578.58	3286.11	0.38306	2223	4743	2639	4360	2399	2656	2365	3963	5328	9756	14776	19603	24596	9180	10486	16731	8487.75
822	unknown1276	0.00267199	0.0697515	24	18	2447.3	0.0713042	1	21.253	12	5127	0.00182251	0.21957	22.6265	14.8727	2885.01	3188.5	1.1052	1200	1948	1247	1751	372	826	410	1353	2506	5107	7582	5313	6442	2578	2639	5082	2897.25
861	unknown1310	0.00267199	0.0697515	18	6	1615.39	0.950031	1	20	6	4638.25	0.0177089	0.315528	19	6.01667	3307.77	1539.7	0.465481	2203	1924	1707	1778	4348	4159	4109	5937	1453	2123	3006	1270	3379	3628	2967	5948	3121.19
898	unknown1344	0.00267199	0.0697515	18	6	5542.3	0.933456	1	20	6	14971.2	0.0174438	0.315528	19	6.01667	10538.9	5110.68	0.484936	7106	6241	5019	5447	13773	13041	14321	18750	4428	6630	10083	3813	10633	10816	9547	19065	9919.56
948	unknown139	0.00267199	0.0697515	24	15	6327.55	0.560539	1	20.8511	12	47834	0.0112388	0.265798	22.4255	13.4611	26088.1	26167.2	1.00303	11572	8584	9981	13411	14720	16062	18729	18738	16668	55737	102221	16710	25319	16395	18970	43897	25482.1
995	unknown1431	0.00267199	0.0697515	24	18	4688.83	0.2038	1	21.1511	12	12785.8	0.00463717	0.21957	22.5755	14.8699	6561.44	7752.78	1.18157	2230	3150	2162	3147	1343	1722	1320	2959	5032	13024	24737	8350	12393	5082	4951	13899	6593.81
1054	unknown1485	0.00267199	0.0697515	24	0	2014.55	0.103454	1	21.995	7.9e-05	6144.49	0.00254135	0.21957	22.9975	4.13e-05	4120.28	2536.68	0.615657	7109	5872	6004	5593	2307	3484	4701	5310	4502	589	938	656	6451	4983	2924	5972	4212.19
1144	unknown1566	0.00267199	0.0697515	18	6	1573.67	0.540337	1	20	6	4420.5	0.0108868	0.265798	19	6.01667	3095.64	1240	0.400563	3129	1841	2941	2584	4270	3991	4127	5294	2219	725	883	694	2015	2511	3173	6729	2945.38
1161	unknown1581	0.00267199	0.0697515	18	15	3191.7	0.464931	1	20	12	12596.2	0.00955423	0.265798	19	13.6167	6132.94	7066.85	1.15228	8312	4206	4670	6427	2299	1726	1622	5554	6429	17869	19688	6399	2668	2414	1976	4773	6064.5
1492	unknown32	0.00267199	0.0697515	18	6	1761.58	0.83222	1	20	6	4887	0.0158073	0.304985	19	6.01667	3310.56	1810.32	0.54683	2491	1350	1261	1765	4720	4923	3865	6040	1962	1988	2464	993	3614	3256	3471	5296	3091.19
1659	unknown470	0.00267199	0.0697515	18	15	852.064	0.27472	1	20	12	8219.5	0.00603164	0.21957	19	13.6167	7149.74	1283.62	0.179534	6532	7110	7258	7826	6166	6067	6266	6977	9001	7435	7783	8659	6975	6129	6864	7149	7137.31
1771	unknown571	0.00267199	0.0697515	24	15	2158.27	0.358551	1	24.7059	12	8177.75	0.00761706	0.24783	24.3529	13.5246	5602.57	2708.25	0.483395	3509	2186	2345	3418	4177	4270	5741	3905	4323	9660	14212	4516	7943	5211	4876	9626	5619.88
1805	unknown601	0.00267199	0.0697515	24	15	3637.71	0.462939	1	21.7778	12	21465.5	0.00951859	0.265798	22.8889	13.4589	12324	10649.2	0.864104	5495	3704	4525	6594	7493	7759	8959	9251	8737	25935	42395	8795	13897	8006	9723	22917	12136.6
1970	unknown750	0.00267199	0.0697515	24	15	1255.11	0.529858	1	20.6557	12	9247	0.0107034	0.265798	22.3279	13.4632	5218.93	4837.81	0.926975	2715	2155	2249	2907	3263	2840	3295	3941	3223	10772	18971	4022	4790	3384	4192	8915	5102.12
1998	unknown776	0.00267199	0.0697515	18	6	2420.43	0.721077	1	20	6	6293	0.0139724	0.29316	19	6.01666	4045.54	2563.64	0.633697	2118	1464	1778	2154	5489	5142	7312	7229	1959	2732	2971	1320	3631	4055	3244	7160	3734.88
2076	unknown846	0.00267199	0.0697515	24	15	1263.07	0.404179	1	20.9501	12	7665.5	0.00845702	0.260918	22.4751	13.4602	4281.64	4079.81	0.952862	1812	1899	1704	1998	2413	2841	3875	2926	3804	8954	14917	2987	3821	2791	3440	6847	4189.31
24	Cer 32:1;2O|Cer 14:1;2O/18:0	0.00421867	0.078272	18	6	1523.64	0.90981	1	20	6	3273	0.0251891	0.382091	19	6.01667	2065.12	1412.6	0.684028	1039	614	628	683	3130	2766	3365	3831	667	850	1382	552	2492	2063	2246	3995	1893.94
26	Cer 32:2;3O|Cer 14:2;2O/18:0;(2OH)	0.00421867	0.078272	18	6	1037.68	0.917671	1	20	5.99999	2742	0.0253734	0.382304	19	6.01666	1933.34	942.506	0.487502	1344	1055	990	916	2510	2509	2470	3479	894	1223	1995	855	1928	1936	1685	3317	1819.12
50	Cer 36:1;3O|Cer 16:1;2O/20:0;O	0.00421867	0.078272	18	6	11781.3	0.797252	1	20	5.99999	26136.8	0.022517	0.365636	19	6.01666	15849.2	11803	0.744706	7828	3647	5359	5907	22564	20494	28978	32511	5532	9952	11542	3272	13581	14968	12297	32271	14418.9
52	Cer 36:2;2O|Cer 14:1;2O/22:1	0.00421867	0.078272	18	6	19863.2	0.829538	1	20	6	47672.2	0.0232899	0.365636	19	6.01667	28778.2	21578.7	0.749829	13248	6886	9366	11895	40145	35427	53630	61487	9675	16255	20569	5121	22598	28371	23234	60705	26163.2
323	PC P-42:5 or PC O-42:6 Isomer A	0.00421867	0.078272	18	15	698.621	0.615665	1	20	12	1907.5	0.0180597	0.317016	19	13.6167	1203.96	912.734	0.758107	1750	1274	1233	1192	725	720	504	708	1700	2424	2583	923	665	898	621	1202	1195.12
370	PE-Cer 36:0;2O|PE-Cer 21:0;2O/15:0	0.00421867	0.078272	18	6	4752.82	0.891826	1	20	6	13346.5	0.0247663	0.378233	19	6.01667	8531.76	5459.45	0.639897	5488	3882	2849	3223	12217	9485	12658	19026	3379	4017	5582	2146	8190	9727	7195	16859	7870.19
379	PEtOH 34:0|PEtOH 16:0_18:0	0.00421867	0.078272	24	15	18978.9	0.336724	1	26.1721	12	61287.5	0.0107346	0.265798	25.0861	13.5904	42042	18597.5	0.442356	18578	21673	14584	21384	31897	31397	33134	35511	26112	74903	107517	36618	72692	33357	41112	78242	42419.4
503	TG 60:1	0.00421867	0.078272	24	15	5711.3	0.499124	1	21.995	12	31633	0.015083	0.304985	22.9975	13.4602	19094.8	14017	0.734077	9647	7958	7868	10579	10556	12508	10445	14450	11817	41248	60769	12698	22750	14696	15644	38271	18869
554	unknown1034	0.00421867	0.078272	24	18	3332.24	0.0669882	1	20.3695	12	7519.5	0.00259187	0.21957	22.1848	14.854	3929.78	4618.41	1.17523	1782	2495	1949	2613	737	1165	821	1470	3881	8304	11016	6877	7661	3195	2680	6775	3963.81
569	unknown1048	0.00421867	0.078272	24	18	4882.75	0.125935	1	20.3695	12	11906	0.00453724	0.21957	22.1848	14.854	5958.22	7308.22	1.22658	2328	3448	2718	3507	948	1699	1094	2419	4826	13041	20327	9430	11262	4081	4363	10702	6012.06
577	unknown1055	0.00421867	0.078272	24	15	4249.36	0.150036	1	28	17.9999	11274.2	0.00529471	0.21957	26	16.4821	7486.04	1607.51	0.214734	2481	3293	2266	3171	4948	5948	5298	4779	4595	11466	17908	7981	14628	7160	8431	14878	7451.94
642	unknown1113	0.00421867	0.078272	24	18	3096.42	0.0947407	1	20.5594	12	7679	0.00352711	0.21957	22.2797	14.8569	4108.35	4688.39	1.14119	2157	2598	1896	2561	730	1072	778	1989	3651	8555	12220	6290	7964	3424	3130	7205	4138.75
655	unknown1125	0.00421867	0.078272	18	6	10711.6	0.762639	1	20	6.00001	36161.5	0.0216822	0.365636	19	6.01667	26832.7	9985.65	0.372145	26269	17687	16852	18283	33872	30916	38070	41788	15894	18992	22795	10726	26260	27948	19311	44299	25622.6
741	unknown1202	0.00421867	0.078272	24	15	16542.8	0.439678	1	24.0327	12	63925.8	0.0135218	0.287294	24.0163	13.501	41268.8	23686.7	0.573962	17579	20124	15911	21024	27966	28218	31622	32016	23624	68104	124732	39243	62297	30301	38797	78853	41275.7
776	unknown1234	0.00421867	0.078272	24	18	6916.21	0.149823	1	21.0501	12	17003.2	0.00528809	0.21957	22.5251	14.8673	8884.77	10452.6	1.17646	3384	4935	3251	4892	1726	2482	1682	3768	6996	18028	30224	12765	16924	6790	6740	18326	8932.06
798	unknown1254	0.00421867	0.078272	18	6	4465.03	0.949893	1	20	6	12299	0.0261261	0.39102	19	6.01667	8116.58	4833.33	0.595488	5098	3497	3077	3222	12194	9346	11681	15975	3117	3923	6209	2285	9473	7574	6872	16951	7530.88
830	unknown1283	0.00421867	0.078272	24	3	81909.5	0.111328	1	21.1511	6.63e-05	384324	0.00406886	0.21957	22.5755	1.41101	310888	98740.8	0.317609	449052	413925	331932	342387	331851	354421	343937	402327	309576	160895	179637	193759	314271	282903	217859	399553	314268
836	unknown1289	0.00421867	0.078272	18	6	20638.7	0.797731	1	20	6	60211.2	0.0225285	0.365636	19	6.01667	42182.6	20317.9	0.481665	29854	24716	22887	24675	57887	50743	58791	73424	17318	29332	44836	16196	43738	38186	34250	68695	39720.5
884	unknown1331	0.00421867	0.078272	18	6	2092.86	0.841047	1	20	6	6181.75	0.0235642	0.367372	19	6.01667	4345.11	2067.02	0.475712	3166	2613	2331	2470	6782	5117	5395	7433	1632	2708	4687	1787	4526	4223	3464	7180	4094.62
896	unknown1342	0.00421867	0.078272	24	18	5837.17	0.172649	1	20.8511	12	16296.2	0.00599049	0.21957	22.4255	14.8626	8508.68	9909.93	1.16468	3725	4543	3584	4382	1486	2304	1498	4114	6500	18587	29308	10790	15279	6473	6577	17824	8560.88
954	unknown1395	0.00421867	0.078272	24	18	4799.66	0.103889	1	20.6557	12	10530.8	0.0038273	0.21957	22.3279	14.8587	5538.6	6455.67	1.16558	2549	3284	2605	3056	868	1443	1014	2577	4558	9438	17209	10918	10616	4368	4154	10587	5577.75
973	unknown1411	0.00421867	0.078272	24	18	6065.92	0.165048	1	20.8511	12	16002.8	0.0057581	0.21957	22.4255	14.8626	8403.22	9546.69	1.13607	3641	4926	3351	4251	1670	2372	1612	4500	6142	17515	28455	11899	16076	6164	6586	16096	8453.5
1013	unknown1448	0.00421867	0.078272	18	15	3343.2	0.536779	1	20	12	14639.2	0.0160562	0.304985	19	13.6167	6636.83	8591.52	1.29452	5921	5357	3674	6649	1162	1515	1224	3412	4542	16172	31003	6840	5233	2208	1981	7965	6553.62
1023	unknown1457	0.00421867	0.078272	18	6	7634.28	0.868028	1	20	6	22188.5	0.0242045	0.374752	19	6.01667	15586.6	7487.52	0.480382	11279	8830	8202	9038	20732	18256	21421	28345	6309	10614	17473	5928	16264	13868	12053	26256	14679.2
1156	unknown1577	0.00421867	0.078272	24	15	15156.5	0.435305	1	23.0287	12	62618.5	0.0134057	0.287294	23.5144	13.4748	37564.4	27568	0.733887	15129	14489	13035	16942	23803	25797	23403	29500	22828	69377	125357	32912	56479	25496	31767	71070	37336.5
1183	unknown1600	0.00421867	0.078272	24	15	2951.64	0.380111	1	23.1496	12	11277.2	0.0119233	0.266897	23.5748	13.4773	6890.79	4856.99	0.704852	2999	2699	2515	3187	4203	4846	5133	5666	3744	13892	20741	6732	10035	5053	5450	12792	6855.44
1241	unknown1653	0.00421867	0.078272	24	15	2134.4	0.497592	1	21.7778	12	10422	0.0150431	0.304985	22.8889	13.4589	6547.57	4415.5	0.674372	3566	3537	2923	4013	4006	4316	4259	5414	4208	11042	20077	6361	9378	4423	4677	11318	6469.88
1253	unknown1664	0.00421867	0.078272	24	18	18725.6	0.161107	1	20.9501	12	37374.2	0.00563703	0.21957	22.4751	14.8649	16373.7	26701.8	1.63078	0	4408	3864	8903	0	0	0	0	13317	37551	72147	26482	37542	5352	14303	40198	16504.2
1513	unknown339	0.00421867	0.078272	24	15	2476.46	0.441302	1	20.9501	12	17118.2	0.0135649	0.287294	22.4751	13.4602	10046.1	8450.6	0.84118	4959	3346	5046	6580	6396	6181	7931	7694	7772	21621	31567	7513	10106	6814	6982	17170	9854.88
1701	unknown508	0.00421867	0.078272	18	6	5342.9	0.777203	1	20	5.99999	11876.2	0.0220342	0.365636	19	6.01666	7253.45	5374.31	0.740933	2971	1537	2224	3111	10570	9568	13897	13470	2662	4858	5766	1394	5664	8714	6195	13034	6602.19
1857	unknown649	0.00421867	0.078272	24	15	5042.2	0.278727	1	25.4179	12	17039	0.00910791	0.265798	24.7089	13.5542	11946.4	4873.4	0.407939	5475	5150	5100	9085	8672	8300	9788	9823	8908	19243	28615	11390	17024	10118	12530	22940	12010.1
2068	unknown839	0.00421867	0.078272	24	15	1255.29	0.384911	1	20.7529	12	7276.5	0.0120535	0.266897	22.3765	13.462	4303.5	3491.78	0.811383	2085	2346	2193	2790	2253	2445	2396	2603	3156	9396	13424	3130	4645	3318	3961	7393	4220.88
2148	unknown910	0.00421867	0.078272	18	15	2167.81	0.387598	1	20	12	7408.75	0.0121263	0.266897	19	13.6167	3780.39	3950.96	1.04512	5042	3099	2986	3778	1834	1647	1970	2712	6008	9201	11207	3219	1793	1505	1685	2188	3742.12
2192	unknown950	0.00421867	0.078272	18	6	6081.83	0.706562	1	20	5.99999	12871.5	0.0203155	0.348156	19	6.01666	7685.3	5964.7	0.776118	3554	1613	2040	2960	11727	10323	14900	14536	1888	5462	6453	1031	6008	9095	6410	13400	6962.5
2236	unknown990	0.00421867	0.078272	24	18	1959.39	0.181472	1	20.5594	12	5958.25	0.00625845	0.21957	22.2797	14.8569	3317.22	3339.04	1.00658	1640	2360	1465	2251	994	1379	878	1740	2881	6730	10127	4095	5332	2405	2385	6760	3338.88
33	Cer 34:1;3O|Cer 14:0;2O/20:1;O	0.0065055	0.098019	18	6	20232.1	0.834555	1	20	6	40123.5	0.0337477	0.445726	19	6.01667	23005.6	19708.8	0.856696	6652	3384	5572	6086	34633	33219	46022	46620	5741	8339	9063	3127	21261	27393	24081	48684	20617.3
35	Cer 34:1;3O|Cer 15:1;2O/19:0;O	0.0065055	0.098019	18	6	10687.9	0.877383	1	20	6	20939.8	0.0351939	0.44724	19	6.01667	12224.6	10122	0.827997	3824	1982	2895	2941	19773	16976	23017	23993	2937	4687	4629	1787	12303	14821	13834	25570	10998.1
64	Cer 38:0;2O	0.0065055	0.098019	18	6	4388.66	0.753475	1	20	6	11817.8	0.0309699	0.434547	19	6.01667	7861.11	4390.01	0.558447	5421	4252	3791	4612	11957	9032	10175	16107	2688	5223	9542	2344	6866	6376	5546	13334	7329.12
313	PC O-38:3|PC O-20:1_18:2	0.0065055	0.098019	18	15	923.481	0.994378	1	20	12	2144	0.0390771	0.471656	19	13.6167	1422.04	1236.6	0.869597	2837	2210	1562	1811	512	632	397	1095	1833	2320	3088	1335	755	546	354	1274	1410.06
362	PE-Cer 34:0;2O|PE-Cer 14:0;2O/20:0	0.0065055	0.098019	18	6	4363.56	0.960704	1	20	6	13899.2	0.0379691	0.463264	19	6.01667	9652.58	4947.83	0.512592	6569	5094	4053	4399	14040	10004	13479	18074	4737	5417	7095	3613	10441	11011	8830	17992	9053
363	PE-Cer 34:1;2O|PE-Cer 14:1;2O/20:0	0.0065055	0.098019	18	6	48577.2	0.834684	1	20	6	132390	0.033752	0.445726	19	6.01667	88338.6	50240.5	0.568726	66420	42270	36590	37476	132927	104427	122379	169828	41262	56244	81878	27742	87419	81591	68967	158587	82250.4
509	TG 62:1	0.0065055	0.098019	24	15	3410.38	0.536385	1	23.1496	12	15897.8	0.0232328	0.365636	23.5748	13.4773	10236.5	6116.05	0.597474	5260	4371	4957	5625	7824	6983	5710	8791	6303	21168	29945	6175	12040	9014	9251	19655	10192
581	unknown1059	0.0065055	0.098019	24	15	1449.57	0.248927	1	24.9858	12	5278	0.0120251	0.266897	24.4929	13.5357	3824.21	1366.44	0.357314	1892	1912	1940	3247	2952	2680	3182	2825	3029	6367	8430	3286	5510	3326	4534	6272	3836.5
678	unknown1146	0.0065055	0.098019	18	6	2195.57	0.958379	1	20	6	8327.5	0.0378923	0.463264	19	6.01667	6590.15	1982.8	0.300873	6110	4805	4154	4403	8095	7065	8061	10089	4111	5272	7046	3282	7132	6460	5628	9885	6349.88
727	unknown1190	0.0065055	0.098019	24	15	3897.75	0.530711	1	22.2166	12	19202.5	0.0230237	0.365636	23.1083	13.4622	11610.2	8515.48	0.733447	5283	5894	3943	6063	6740	7289	7769	9012	5570	23210	38454	9576	16892	7641	9517	20931	11486.5
745	unknown1206	0.0065055	0.098019	24	15	53374.4	0.493346	1	23.6461	12	222890	0.0216371	0.365636	23.8231	13.4896	145156	84363.2	0.581188	63035	78715	56535	80238	105038	103411	112918	123183	83747	242921	432983	131909	224932	107499	123116	248148	144896
770	unknown1229	0.0065055	0.098019	18	6	4410.58	0.694383	1	20	6	13197.2	0.02891	0.410966	19	6.01667	7804.98	6044.07	0.774386	4478	2316	2583	2716	12390	8344	13139	18916	2564	4508	6358	1601	5702	7505	5147	14894	7072.56
823	unknown1277	0.0065055	0.098019	24	15	1311.33	0.522345	1	21.995	12	7145	0.0227148	0.365636	22.9975	13.4602	4327.04	3172.23	0.733119	2105	2271	1567	2220	2328	2766	2913	3302	2136	8916	13966	3562	5984	3004	3272	8103	4275.94
885	unknown1332	0.0065055	0.098019	24	18	5394.87	0.225698	1	20.2759	12	17285	0.0110468	0.265798	22.1379	14.8527	8822.37	10345.5	1.17265	4316	5214	4164	5289	890	3158	1215	5106	6922	19435	32306	10477	14441	6087	6145	17289	8903.38
943	unknown1385	0.0065055	0.098019	24	18	9723.07	0.178132	1	20.6557	12	26756.5	0.00899297	0.265798	22.3279	14.8587	13919.5	16107.5	1.15719	6137	8215	5813	7916	2543	4144	2867	6703	10864	29237	48260	18665	26021	9815	10179	26896	14017.2
1007	unknown1442	0.0065055	0.098019	24	15	5050.86	0.412014	1	22.9091	12	21572.8	0.0185529	0.320394	23.4545	13.4724	12867	9813.23	0.762669	5153	4751	4529	5566	7990	8864	9543	10851	7364	26983	40850	11094	18202	8825	10185	23672	12776.4
1061	unknown1491	0.0065055	0.098019	18	6	1029.9	0.984357	1	20	5.99999	2594.75	0.0387482	0.470214	19	6.01666	1671.92	1104.64	0.6607	794	546	390	606	2222	1816	2328	4013	428	1094	1427	382	2200	1377	1688	3298	1538.06
1110	unknown1535	0.0065055	0.098019	24	15	20486.5	0.330171	1	22.1053	12	66600.8	0.0153432	0.304985	23.0526	13.4611	32719.2	36087.2	1.10293	5570	7223	4471	6583	4888	7512	3520	13946	18279	72620	142214	33290	60704	20493	19104	94239	32166
1163	unknown1583	0.0065055	0.098019	24	15	1768.83	0.403286	1	22.2166	12	7824.5	0.018216	0.317016	23.1083	13.4622	4983.99	3212.8	0.644623	2757	2704	2168	2923	2986	3214	3649	4473	2868	9487	13614	5329	6741	3612	3703	8769	4937.31
1168	unknown1588	0.0065055	0.098019	18	12	852.417	0.11309	1	20	12	10035.5	0.00604361	0.21957	19	12.0333	4931.52	5405.58	1.09613	2156	2780	2648	2592	2876	3341	2391	2217	3076	12791	13514	10761	1122	2441	1372	2609	4292.94
1171	unknown1590	0.0065055	0.098019	18	12	1955.86	0.319746	1	20	12	28802.5	0.0149255	0.304985	19	12.0333	11203.9	18300.6	1.63341	3444	1829	1917	3705	2738	3471	2113	3015	3849	47264	53497	10600	743	2070	1102	3315	9042
1206	unknown1621	0.0065055	0.098019	24	18	1972.12	0.340179	1	21.5648	12	6414.75	0.0157422	0.304985	22.7824	14.8822	3114.13	4131.13	1.32658	961	1084	672	835	425	604	246	1213	1637	6994	13725	3303	6516	2096	1618	8090	3126.19
1257	unknown1668	0.0065055	0.098019	18	15	5860.5	0.797445	1	20	12	15378.8	0.032483	0.445726	19	13.6167	7705.18	9467.19	1.22868	14500	7878	6808	7663	2621	2547	2152	4249	5073	17377	28193	10872	4379	1514	2060	3930	7613.5
1912	unknown699	0.0065055	0.098019	24	15	1153.64	0.502891	1	20.2759	12	10331	0.021993	0.365636	22.1379	13.4691	5820.87	5515.32	0.947508	2784	2707	2588	3726	3026	3562	4542	4772	4624	12314	20325	4061	4449	4004	3744	9625	5678.31
1947	unknown73	0.0065055	0.098019	18	15	3084.4	0.514225	1	20	12	10696.5	0.0224141	0.365636	19	13.6167	6655.06	4711.47	0.707952	7898	4973	6128	9828	4804	4644	3296	5599	7195	12863	12247	10481	3452	3386	3477	5480	6609.44
1997	unknown775	0.0065055	0.098019	18	6	9199.81	0.102153	1	20	6	29784.2	0.00552668	0.21957	19	6.01667	20408.8	8481.57	0.415584	20259	15833	21795	16661	27871	28707	33926	28633	19906	6200	7160	6235	14083	19316	16204	27307	19381
2097	unknown865	0.0065055	0.098019	18	6	2286.61	0.905744	1	20	5.99999	5172	0.0361441	0.453315	19	6.01666	3286.63	2199.73	0.669297	1620	1014	989	1482	5186	4186	5393	5923	1367	2501	2242	486	2614	3442	3089	6787	3020.06
2142	unknown905	0.0065055	0.098019	24	15	2019.85	0.534521	1	20.7529	12	15830.8	0.0231642	0.365636	22.3765	13.462	8777.19	8547.77	0.973862	4745	2784	3169	4821	4876	5307	6571	7665	5980	19467	31694	6182	7733	5640	4841	15724	8574.94
29	Cer 34:0;2O|Cer 14:0;2O/20:0	0.00980952	0.11904	18	6	10887	0.950849	1	20	6	21861	0.052931	0.543549	19	6.01667	13965.9	9424.92	0.674854	5356	3722	4257	4898	21005	19556	23726	23157	4558	7039	6556	4245	15965	17455	18281	25404	12823.8
45	Cer 36:0;2O|Cer 14:0;2O/22:0	0.00980952	0.11904	18	6	13967.5	0.884798	1	20	5.99999	32764.5	0.049879	0.543549	19	6.01666	20321.3	14422.3	0.709711	10152	5387	6580	7956	28635	25201	35406	41816	6114	13815	18201	3189	14905	22062	15569	42190	18573.6
129	DG 38:3	0.00980952	0.11904	24	15	551.897	0.626004	1	20	12	8166.75	0.0374147	0.463264	22	13.475	4601.98	4400.89	0.956303	2659	2520	2310	2705	2354	2938	2704	3606	3139	9572	16983	2973	3480	2870	2870	8055	4483.62
321	PC P-38:3 or PC O-38:4 Isomer A	0.00980952	0.11904	18	15	3870	0.952861	1	20	12	10415	0.0530233	0.543549	19	13.6167	6444.11	5626.33	0.873097	11641	6405	7168	8718	2380	3838	2049	5504	9282	12899	14417	5062	3031	2931	1916	4993	6389.62
364	PE-Cer 34:1;3O	0.00980952	0.11904	18	6	12196.2	0.952711	1	20	6	24984.5	0.0530164	0.543549	19	6.01667	14718.5	12105.2	0.822443	3682	3133	2336	2410	28582	19570	22156	29630	2437	3402	4186	2308	22650	17311	17032	31201	13251.6
392	PG 36:1|PG 18:0_18:1	0.00980952	0.11904	18	6	2550.71	0.92922	1	20	6	6246	0.0519367	0.543549	19	6.01667	4074.44	2477.75	0.608119	2706	1685	1462	1882	5936	5291	6027	7730	1821	2396	3103	910	3522	4149	2671	9096	3774.19
499	TG 58:5	0.00980952	0.11904	24	15	1763.17	0.548274	1	20.6557	12	16458.8	0.033482	0.445726	22.3279	13.4632	9501.68	8407.64	0.884859	4744	4410	3863	6135	6528	5902	6575	7237	6610	20109	32737	6379	9046	6169	6628	15707	9298.69
534	unknown1016	0.00980952	0.11904	18	15	3458.46	0.419601	1	20	12	20319.2	0.0267252	0.393213	19	13.6167	8365.78	11974.8	1.4314	7424	5293	4601	7846	3045	2443	2999	4540	7378	25211	39644	9044	2779	1894	2296	5560	8249.81
542	unknown1023	0.00980952	0.11904	24	15	2206.17	0.587129	1	20.464	12	21133.8	0.0354605	0.44724	22.232	13.4659	11421.9	11831	1.03582	4884	4031	4828	5750	6688	6014	9465	9471	6905	26758	43683	7189	9096	6123	6871	20254	11125.6
571	unknown105	0.00980952	0.11904	18	6	22313.8	0.909085	1	20	6	49738	0.0510067	0.543549	19	6.01667	28874.7	24184.7	0.837573	9907	5477	5905	6768	46256	36388	52243	64065	6804	13461	14943	3686	24962	30905	24100	69234	25944
755	unknown1215	0.00980952	0.11904	18	6	5665.52	0.980553	1	20	6	19915	0.0542887	0.550391	19	6.01667	15016.8	5731.28	0.381657	10931	9857	8814	9147	19659	16071	18859	25071	8350	12062	15547	5862	15135	13861	13776	26155	14322.3
818	unknown1272	0.00980952	0.11904	18	12	1712.61	0.127937	1	20	12	7112.75	0.00963919	0.265798	19	12.0333	4488.32	2879.75	0.641609	4061	2768	2769	3696	4496	3994	2898	2855	3925	7909	7937	8680	2016	3296	2207	2863	4148.12
841	unknown1293	0.00980952	0.11904	24	15	2702.92	0.240276	1	21.7778	12	8533	0.0166177	0.30832	22.8889	13.4589	5163	3693.66	0.71541	2163	2908	2178	3057	2842	2872	2697	2843	3775	8760	15394	6203	9349	3782	4451	8294	5098
925	unknown1369	0.00980952	0.11904	18	15	5802.52	0.920673	1	20	12	14120.5	0.0515424	0.543549	19	13.6167	7697.18	8653.93	1.1243	12495	7934	7974	12102	2424	3080	1966	4712	10011	19502	23223	3746	3384	2767	1519	4975	7613.38
1022	unknown1456	0.00980952	0.11904	24	15	6606.5	0.551687	1	23.1496	12	27698.8	0.0336569	0.445726	23.5748	13.4773	15629.3	12156.3	0.777788	3668	5569	3958	5490	4964	6966	4770	11669	8013	29537	61829	11416	27908	9493	9182	44221	15540.8
1038	unknown1470	0.00980952	0.11904	24	15	10777.7	0.517755	1	23.6461	12	41131	0.0319091	0.444944	23.8231	13.4896	24537.5	16115	0.656749	7516	9661	7254	10138	9178	11966	8400	20752	13129	46572	85617	19206	43799	16449	14956	67210	24487.7
1052	unknown1483	0.00980952	0.11904	24	15	3539.42	0.535741	1	23.1496	12	14417	0.0328382	0.445726	23.5748	13.4773	8401.7	6030.41	0.71776	2468	3330	2408	3337	2949	3934	2729	6926	4511	16134	30656	6367	14809	5317	4943	22907	8357.81
1084	unknown1511	0.00980952	0.11904	24	15	9347.95	0.444612	1	21.5648	12	34672.2	0.0280656	0.406499	22.7824	13.4583	15955.1	20757.5	1.301	1840	2708	1708	2431	1687	2697	1289	4834	8259	32530	83023	14877	27197	8620	8063	47210	15560.8
1133	unknown1556	0.00980952	0.11904	24	15	3862.22	0.419399	1	21.0501	12	16411.8	0.0267142	0.393213	22.5251	13.4595	7486.32	10263.9	1.37101	1126	1640	1042	1627	970	1729	783	2600	3236	18607	37330	6474	12235	4202	3374	19180	7259.69
1139	unknown1561	0.00980952	0.11904	24	18	6600.49	0.460751	1	21.5648	12	26538.5	0.0289232	0.410966	22.7824	14.8822	12102.1	17157	1.41769	1711	2538	1993	2496	1296	2442	1174	4077	5731	26442	63459	10522	22301	7509	5957	34787	12152.2
1186	unknown1603	0.00980952	0.11904	24	15	11383.7	0.381105	1	21.253	12	47027	0.024633	0.378233	22.6265	13.4585	21851.1	28553.2	1.30671	3530	4874	3516	4734	2621	5243	2192	7567	10022	54734	103927	19425	39064	12932	10269	55413	21253.9
1351	unknown193	0.00980952	0.11904	18	6	5943.94	0.854758	1	20	6	11125.2	0.0484752	0.53398	19	6.01667	6182.02	5696.73	0.9215	1376	853	1117	1051	10856	8910	11220	13515	1159	2332	2576	0	5000	7202	6241	14459	5491.69
1475	unknown304	0.00980952	0.11904	18	6	1342.27	0.996337	1	20	6	8805.25	0.0550065	0.550391	19	6.01667	7763.18	1225.86	0.157907	7053	5607	6727	6816	9059	7882	9779	8501	7106	6578	6890	5206	7248	8748	7922	10712	7614.62
1547	unknown37	0.00980952	0.11904	18	6	4072.76	0.794324	1	20	6	7504.75	0.0456192	0.527997	19	6.01667	4158.26	3814.15	0.917246	1154	843	616	808	7189	6059	8058	8713	1083	1248	1400	0	3784	4833	4039	9310	3696.06
1812	unknown608	0.00980952	0.11904	18	6	2086.32	0.99279	1	20	6.00001	5204.25	0.0548454	0.550391	19	6.01667	3742.37	1840.19	0.491717	1288	1397	1718	2442	5388	5516	4243	5670	2291	3431	3033	1113	4038	4999	4166	5577	3519.38
1836	unknown63	0.00980952	0.11904	18	6	4873.56	0.714297	1	20	5.99999	11781.2	0.0417672	0.48932	19	6.01666	7681.79	4649.39	0.605248	5147	3272	2585	4497	8991	13158	13658	11318	2692	5689	8936	1585	7388	5300	7488	12190	7118.38
1870	unknown660	0.00980952	0.11904	18	6	2374.29	0.943629	1	20	6	5743	0.0525996	0.543549	19	6.01667	3710.92	2369.28	0.638461	1872	1095	1680	1464	5205	4645	6285	6837	1830	2221	2293	889	3764	3578	2994	8129	3423.81
1903	unknown690	0.00980952	0.11904	18	15	7146.02	0.833714	1	20	12	16549	0.0474856	0.533026	19	13.6167	8858.57	10010.5	1.13003	15097	8367	9089	12873	2702	2019	2809	7531	17679	23758	19588	5171	2827	2263	1900	6513	8761.62
1935	unknown719	0.00980952	0.11904	18	6	2421.31	0.936602	1	20	6	6342.75	0.0522766	0.543549	19	6.01667	3971.63	2773.83	0.698411	1757	1133	1173	1403	5953	4521	6343	8554	1374	1961	1918	1121	3722	4661	4623	7951	3635.5
1939	unknown722	0.00980952	0.11904	18	6	7118.44	0.82763	1	20	6	13425.5	0.0471985	0.533026	19	6.01667	7375.44	6928.22	0.939364	1723	1000	1160	1126	14592	10545	14231	14334	1519	1787	1939	0	6868	8775	8144	16831	6535.88
1963	unknown744	0.00980952	0.11904	18	6	12635.3	0.904541	1	20	6	29205	0.0507962	0.543549	19	6.01667	19219	11696.3	0.608576	10823	6775	7730	7552	25334	25686	32147	33653	8538	11735	11397	5705	20827	22172	20897	33856	17801.7
2041	unknown814	0.00980952	0.11904	18	15	6779.03	0.949802	1	20	12	16617	0.052883	0.543549	19	13.6167	10260.9	9119.47	0.888755	17504	10956	11113	14811	5175	4383	3760	7605	13298	21903	23266	8001	4863	4515	2669	8940	10172.6
2061	unknown832	0.00980952	0.11904	24	15	2131.93	0.539042	1	20.6557	12	17267	0.033008	0.445726	22.3279	13.4632	9341.26	9604.41	1.02817	4745	2460	3626	4991	5410	4912	7596	6684	5798	21705	35262	6303	8542	4994	6287	16435	9109.38
2081	unknown850	0.00980952	0.11904	18	15	11786.8	0.871416	1	20	12	30621.2	0.0492549	0.539401	19	13.6167	17217.6	17642.3	1.02467	29458	15412	17217	23806	5904	7324	5790	11759	22373	37295	50512	12305	8150	6272	3063	16108	17046.8
2083	unknown852	0.00980952	0.11904	24	18	4960.35	0.175235	1	20.5594	12	14522.2	0.012662	0.275982	22.2797	14.8569	8048.06	8249.64	1.02505	4018	5782	3763	5359	2117	3164	2256	4288	6884	16721	24437	10047	13290	5535	5959	16005	8101.56
2230	unknown985	0.00980952	0.11904	18	6	1681.32	0.999758	1	20	6	6998.75	0.0551617	0.550391	19	6.01667	5985.94	1289.4	0.215404	4912	4787	4029	3943	6935	6920	6736	7404	3858	4683	5391	3721	8305	6836	6025	8790	5829.69
2126	unknown891	0.0121536	0.137913	18	6	3218.04	0.885186	1	20	5.99999	7036.75	0.0595154	0.570138	19	6.01666	3845.23	3744.8	0.973882	0	507	173	812	6746	4551	8637	8213	715	2033	0	1669	3450	4341	3609	8807	3391.44
6	CAR 16:0	0.0144977	0.137913	24	12	4567.56	0.546429	1	21.6708	12	41076.8	0.0462494	0.530096	22.8354	12.0313	26687.5	13905.8	0.521062	17341	13895	10589	17846	22532	20838	20146	32113	20563	49368	73777	20599	19686	21278	18460	39855	26180.4
66	Cer 38:1;2O|Cer 16:1;2O/22:0	0.0144977	0.137913	18	6	878.227	0.579026	1	20	6	3091	0.048522	0.53398	19	6.01667	2154.63	1000.59	0.464389	1909	1417	1300	1345	2541	2545	3033	4245	1126	1510	2217	877	1919	1937	1393	3220	2033.38
67	Cer 38:1;3O	0.0144977	0.137913	18	6	12039.2	0.891696	1	20	5.99999	33335.8	0.0691417	0.598523	19	6.01666	22687.7	12005.7	0.529171	16170	11790	11894	12381	29080	25684	32166	46413	8353	16132	29007	6804	20060	17144	14652	41996	21232.9
202	LPE 20:0	0.0144977	0.137913	18	6	7128.34	0.995237	1	20	5.99999	20279.8	0.0755851	0.598523	19	6.01666	12931.4	8905.67	0.688687	4996	3940	2831	3456	20183	13020	17425	30491	3757	6294	9627	3348	15457	12561	11634	30615	11852.2
284	PC 35:4	0.0144977	0.137913	18	12	114.905	0.37735	1	20	12	710	0.0339641	0.445903	19	12.0333	406.618	324.783	0.798744	253	219	186	293	299	330	218	388	247	469	833	1291	143	184	174	365	368.25
305	PC 40:5 Isomer B	0.0144977	0.137913	18	15	417.193	0.370834	1	20	12	2097.25	0.0334713	0.445726	19	13.6167	1113.95	1007.61	0.904539	869	716	800	1110	422	539	260	983	1201	2073	3867	1248	961	487	554	1577	1104.19
316	PC P-36:1 or PC O-36:2	0.0144977	0.137913	18	15	2812.87	0.996364	1	20	12	7298.5	0.0756544	0.598523	19	13.6167	4945.16	3862.71	0.781109	9264	7569	4849	6135	2432	2298	1930	3990	5527	7733	11151	4783	3050	2204	1303	4306	4907.75
360	PE P-38:2 or PE O-38:3	0.0144977	0.137913	18	15	4197.74	0.96816	1	20	12	10045	0.0739159	0.598523	19	13.6167	5758.58	6371.98	1.10652	10031	8399	7210	8083	1854	2147	1517	3505	7392	10718	16658	5412	2390	1642	1105	3087	5696.88
493	TG 56:5 Isomer C	0.0144977	0.137913	24	15	613.062	0.537563	1	21.5648	12	3622.75	0.0456265	0.527997	22.7824	13.4583	2273.33	1557.32	0.685039	1305	1038	1168	1468	1213	1309	1755	2041	1826	4322	6862	1481	2185	1731	2002	4194	2243.75
497	TG 58:2	0.0144977	0.137913	24	15	4989.52	0.548297	1	22.2166	12	26840.2	0.0463804	0.530096	23.1083	13.4622	17307.6	10603.1	0.612628	9312	7962	9876	10704	9798	13531	11346	13428	13221	31235	52130	10775	20649	14356	14755	31379	17153.6
507	TG 60:5	0.0144977	0.137913	24	15	692.258	0.470038	1	21.6708	12	3628.75	0.0408099	0.482201	22.8354	13.4585	2242.79	1603.63	0.715016	1344	743	1208	1392	1584	1457	1229	1997	1965	4548	6758	1244	1854	1881	2571	3640	2213.44
510	TG 62:2	0.0144977	0.137913	24	15	3746.61	0.453608	1	21.7778	12	18204.8	0.0396174	0.47562	22.8889	13.4589	10909.9	8225.18	0.753921	5220	4816	4631	6290	5764	7316	4803	8868	7101	23221	34594	7903	13170	8264	9217	21064	10765.1
567	unknown1046	0.0144977	0.137913	18	15	9354.32	0.892338	1	20	12	22164	0.0691821	0.598523	19	13.6167	11457.2	13917.2	1.21471	22519	9226	10461	16244	2485	3300	2612	7774	14946	29744	37930	6036	3344	2807	1965	9766	11322.4
599	unknown1075	0.0144977	0.137913	18	15	623.315	0.99899	1	20	12	4559.75	0.0758156	0.598523	19	13.6167	3978.15	932.29	0.234352	4436	4719	4649	4114	3032	3732	3063	4095	5194	4559	3826	4660	3706	3231	3191	3299	3969.12
618	unknown1092	0.0144977	0.137913	18	15	1234.25	0.944731	1	20	12	6223.5	0.0724627	0.598523	19	13.6167	5172.26	1633.43	0.315806	6050	5747	5525	6186	4270	4031	3750	4662	6443	6781	6494	5176	4177	3877	3547	5787	5156.44
669	unknown1138	0.0144977	0.137913	18	15	26878.7	0.834252	1	20	12	75754.8	0.0654929	0.598523	19	13.6167	38341.8	46375.1	1.20952	67949	29667	37757	47737	9770	12638	9402	25737	45613	102446	133545	21415	12836	12157	5681	31933	37892.7
726	unknown119	0.0144977	0.137913	18	6	12907.2	0.985371	1	20	6	31064.8	0.0749782	0.598523	19	6.01667	20395.9	12785.7	0.626877	10891	5680	6381	8428	28282	23164	34723	38090	7872	14535	18052	4293	17507	20783	16209	46654	18846.5
751	unknown1211	0.0144977	0.137913	24	21	9314.72	0.0919836	1	23.3952	17.9999	55716.9	0.0101616	0.265798	23.6976	19.484	48131.4	9123.43	0.189553	56732	54194	44024	56234	46185	40921	31506	39147	50539	44432	35772	49463	56034	54835	55949	56050	48251.1
829	unknown1282	0.0144977	0.137913	24	15	47010.9	0.484439	1	23.52	12	203907	0.0418483	0.48932	23.76	13.4862	132066	78252.3	0.592525	64931	67294	52170	69722	93606	95455	96578	114184	85527	228363	393178	108561	199980	93828	114720	229728	131739
888	unknown1335	0.0144977	0.137913	18	15	2898.08	0.550236	1	20	12	14479.2	0.0465162	0.530096	19	13.6167	6667.12	8208.63	1.23121	5014	5513	3416	6429	1584	1655	1245	3639	4629	14899	31602	6787	6186	2496	2046	8262	6587.62
892	unknown1339	0.0144977	0.137913	24	3	36972.1	0.0926016	1	20.2759	6.63e-05	156970	0.0102208	0.265798	22.1379	1.38366	121571	51931.4	0.427168	189938	161525	142232	134185	123653	140483	151006	171403	124047	46688	48891	52493	128819	118453	87746	163759	124083
897	unknown1343	0.0144977	0.137913	18	15	5581.55	0.912542	1	20	12	17189.8	0.0704524	0.598523	19	13.6167	10770.5	8372.69	0.777376	14666	11605	9513	17489	6813	7720	4362	9160	9944	18811	22723	17281	4385	4152	3546	8860	10689.4
949	unknown1390	0.0144977	0.137913	24	18	6030.56	0.167727	1	20.464	12	15457.5	0.0170682	0.31153	22.232	14.8554	7903.87	9738.37	1.2321	3333	5224	3606	4431	255	1324	247	5414	6306	18464	27139	9921	14612	5998	5864	15402	7971.25
974	unknown1412	0.0144977	0.137913	24	18	2664.02	0.29623	1	20	12	9799	0.0277022	0.403841	22	14.85	4314.92	6164.38	1.42862	1922	2110	1583	2414	529	883	694	1832	3643	10449	20353	4751	5912	2550	1897	8434	4372.25
987	unknown1424	0.0144977	0.137913	18	6	1123.95	0.996195	1	20	5.99998	3709.25	0.075644	0.598523	19	6.01666	2658.66	1108.15	0.416809	3374	1256	1130	1593	4015	2667	2146	6009	940	725	1768	747	1802	3212	1433	7573	2524.38
1008	unknown1443	0.0144977	0.137913	24	18	3930.28	0.108649	1	20.5594	12	8507.75	0.0117403	0.266897	22.2797	14.8569	4023.22	5286.58	1.31402	1244	1868	1345	1952	783	888	623	1500	3099	8621	14843	7468	7271	2987	3096	7332	4057.5
1017	unknown1451	0.0144977	0.137913	18	6	2346.53	0.982266	1	20	5.99999	7646.25	0.0747869	0.598523	19	6.01666	5753.66	2218.54	0.385588	4317	3921	3202	3326	7545	6042	7294	9704	3095	4649	6121	2382	5880	5225	4967	10087	5484.81
1043	unknown1475	0.0144977	0.137913	18	9	1261.3	0.852075	1	20	6	4357.5	0.0666309	0.598523	19	7.6	3307.02	1012.42	0.306143	2130	1583	1914	1527	3861	3580	4781	5208	2485	3659	3666	2098	2627	3137	2207	5265	3108
1117	unknown1541	0.0144977	0.137913	24	18	2994.95	0.468681	1	20	12	20199.8	0.0407118	0.482201	22	14.85	7191.55	13078.2	1.81855	2084	2664	1395	2082	1212	1665	883	2070	2978	24065	47865	5891	8017	2479	2240	9421	7313.19
1131	unknown1554	0.0144977	0.137913	18	15	6127.79	0.99827	1	20	12	17768.2	0.0757715	0.598523	19	13.6167	12237.5	9069.34	0.74111	19421	17591	14585	17036	6508	6701	4499	10808	14852	18655	26415	11151	7214	4785	3068	11106	12149.7
1155	unknown1576	0.0144977	0.137913	18	15	2116.55	0.838799	1	20	12	6944.5	0.0657837	0.598523	19	13.6167	4342.18	3245.75	0.747494	6102	4609	3706	6169	2955	3241	1878	3753	4101	7243	9251	7183	2000	1722	1424	3635	4310.75
1180	unknown1599	0.0144977	0.137913	18	15	7242.72	0.994728	1	20	12	15957.5	0.0755539	0.598523	19	13.6167	9896.66	9890.65	0.999393	19777	12872	14527	12812	2940	4123	2339	6950	12645	17702	25788	7695	4663	2953	1712	7316	9800.88
1204	unknown162	0.0144977	0.137913	18	6	3792.92	0.944736	1	20	6	9579.5	0.072463	0.598523	19	6.01666	6278.88	3896.07	0.620505	3067	2129	2343	2671	8923	7486	11081	10828	2849	3552	4188	1838	5483	8648	5956	11866	5806.75
1258	unknown1669	0.0144977	0.137913	18	9	4392.19	0.861729	1	20	6	8483	0.0672452	0.598523	19	7.6	4491.59	3248.23	0.723179	370	245	195	78	5759	8470	12373	7330	352	2199	7126	460	1468	229	2144	12851	3853.06
1312	unknown1717	0.0144977	0.137913	18	15	9038.77	0.709064	1	20	12	27945.8	0.0573364	0.557231	19	13.6167	10870.2	18914.6	1.74004	17084	9277	5089	11616	1606	1319	1094	3923	3610	33124	60926	14123	2528	647	938	4088	10687
1448	unknown280	0.0144977	0.137913	18	6	7483.49	0.978622	1	20	5.99999	20130	0.0745621	0.598523	19	6.01666	13863	7519.42	0.542409	8545	4913	5263	6943	19788	15484	20349	24899	7400	10002	11238	4099	11657	16674	13297	26678	12951.8
1457	unknown289	0.0144977	0.137913	18	6	6255.77	0.779839	1	20	5.99999	14297.8	0.0619838	0.583082	19	6.01666	8165.95	7021.17	0.859811	3474	1534	1404	2373	12318	10254	17661	16958	2195	4973	5844	915	5200	8220	5819	17900	7315.12
1563	unknown384	0.0144977	0.137913	18	6	2918.58	0.99308	1	20	6.00002	10104.5	0.0754526	0.598523	19	6.01667	7817.28	2778.68	0.355453	6001	3853	4763	5274	9401	8147	11263	11607	4988	6837	7418	3582	7504	9095	7293	12663	7480.56
1616	unknown431	0.0144977	0.137913	18	6	2430.68	0.985768	1	20	6	8411.75	0.0750026	0.598523	19	6.01667	6465.05	2307.96	0.35699	4383	4335	3642	4490	8767	7276	9033	8571	4197	6728	5422	1543	6656	7608	6302	10013	6185.38
1708	unknown514	0.0144977	0.137913	18	15	5967.98	0.971158	1	20	12	15393.2	0.0741012	0.598523	19	13.6167	9840.97	8283.51	0.841737	15884	10807	11286	15159	3884	5126	4408	7387	12814	19747	21445	7567	5572	3745	3568	7773	9760.75
1739	unknown542	0.0144977	0.137913	18	15	1032.2	0.91626	1	20	12	7077.75	0.0706854	0.598523	19	13.6167	6286.89	1602.06	0.254825	7214	6737	7327	7498	2647	5781	5525	5897	8301	6776	6074	7160	5820	6244	5237	6104	6271.38
1743	unknown546	0.0144977	0.137913	18	6	3074.15	0.703747	1	20	5.99999	8204.5	0.0569833	0.557231	19	6.01666	5342.7	3293.22	0.616396	2926	1932	2517	2683	7749	6456	8777	9836	2728	3739	4444	2094	4477	5320	4250	9170	4943.62
1872	unknown662	0.0144977	0.137913	18	15	367.342	0.999257	1	20	12	3273	0.075832	0.598523	19	13.6167	3032.19	503.68	0.166111	3344	3334	3279	3632	2663	3049	2408	2638	3206	3458	3077	3351	2698	2850	2391	3059	3027.31
1885	unknown674	0.0144977	0.137913	24	12	2407.35	0.395818	1	21.0501	12	12014.8	0.0353522	0.44724	22.5251	12.0517	7272.99	4965.29	0.682703	4780	2361	2648	4393	5570	5479	8206	7797	5924	15201	20457	6477	3551	4392	4232	11299	7047.94
1915	unknown700	0.0144977	0.137913	18	6	34533.7	0.885735	1	20	5.99999	79408.8	0.0687656	0.598523	19	6.01666	43432.2	41618.9	0.95825	14183	4067	4074	6072	62869	51576	86369	116821	6495	21967	37923	1868	24963	38795	24991	111188	38388.8
2091	unknown86	0.0144977	0.137913	18	6	30715.1	0.961927	1	20	6.00001	74350	0.0735301	0.598523	19	6.01667	47338.4	32033.3	0.676688	23878	12461	13610	17797	65589	53922	85747	92142	17492	32372	41928	9100	37743	47086	38933	105505	43456.6
2124	unknown89	0.0144977	0.137913	18	6	13091.6	0.731704	1	20	5.99999	30276.5	0.0588337	0.566874	19	6.01666	17062	15022.4	0.880459	8718	1815	3333	4655	26308	20371	36172	38255	4606	9151	13558	1869	11245	16045	11112	36653	15241.6
2219	unknown975	0.0144977	0.137913	18	6	1214.1	0.976289	1	20	5.99999	4038.25	0.0744182	0.598523	19	6.01666	3087.51	1152.26	0.373202	1742	1711	1933	2228	3732	3644	4906	3871	2035	2629	2215	1678	3315	3403	4118	4006	2947.88
2228	unknown983	0.0144977	0.137913	18	15	48384.3	0.829213	1	20	12	145890	0.0651702	0.598523	19	13.6167	79301.7	83471.6	1.05258	115941	73404	88528	102161	26906	35734	25822	59594	102933	179401	248443	52782	31803	26223	18066	68153	78493.4
2235	unknown99	0.0144977	0.137913	18	6	4240.17	0.922376	1	20	6	13842.2	0.0710682	0.598523	19	6.01667	10481.3	3895.01	0.371615	8211	5929	5499	8619	11863	13168	15999	14339	5304	9697	12609	4508	10094	8793	9787	15730	10009.3
2	CAR 12:1	0.0210199	0.163853	24	3	671.928	0.269594	1	28	4.94e-05	1732.25	0.0349821	0.44724	26	1.62502	1090.84	61.0971	0.056009	1315	1958	1502	2154	1656	872	1402	1069	2077	591	370	366	428	473	532	670	1089.69
7	CAR 16:1	0.0210199	0.163853	24	15	6182.59	0.666698	1	23.9024	12	18485.5	0.0738211	0.598523	23.9512	13.497	10398.6	9628.88	0.925979	2201	3029	1910	2473	8815	3484	2510	21045	5423	17429	39707	11383	5945	5544	11619	23728	10390.3
25	Cer 32:2;2O|Cer 14:2;2O/18:0	0.0210199	0.163853	18	6	3329.77	0.874252	1	20	6	14174.8	0.0918222	0.678766	19	6.01667	11226.8	3238.49	0.28846	11811	8677	7198	7631	12976	12332	12889	18502	8367	8026	12461	6856	11978	9101	9023	15522	10834.4
68	Cer 38:1;3O|Cer 16:1;2O/22:0;(2OH)	0.0210199	0.163853	18	6	10296.9	0.839428	1	20	5.99999	28795	0.0888818	0.667357	19	6.01666	19411.9	10563.6	0.544183	13171	9923	10093	10700	27057	21403	28772	37948	7569	14045	22770	6165	16725	15392	12422	35954	18131.8
166	HexCer 35:2;3O|HexCer 16:1;2O/19:1;O	0.0210199	0.163853	18	15	13078.1	0.941331	1	20	12	33626.5	0.0974047	0.678766	19	13.6167	20450.2	18411.6	0.900312	33223	21195	23464	29506	8461	11057	7931	15602	27058	43440	48221	15787	10896	7889	6140	14481	20271.9
186	LPC 20:0	0.0210199	0.163853	24	12	2259.74	0.708461	1	26.1721	12	12262.2	0.0775406	0.606546	25.0861	12.0225	8549.73	3432.6	0.401486	4789	3116	3355	4434	7417	5475	7623	13748	8047	15000	20495	5507	6478	6523	6496	20275	8673.62
311	PC O-36:1|PC O-18:0_18:1	0.0210199	0.163853	18	15	3311.03	0.992098	1	20	12	9002	0.101562	0.683378	19	13.6167	6256.72	4527.18	0.723572	10032	9425	6832	7826	2933	3378	2256	5243	6580	9497	13883	6048	4358	3218	1404	6493	6212.88
367	PE-Cer 35:1;2O|PE-Cer 17:0;2O/18:1	0.0210199	0.163853	18	6	427.976	0.896137	1	20	6	1659.25	0.093655	0.678766	19	6.01667	1270.58	427.159	0.336193	1151	1014	745	876	1665	1273	1620	2079	808	1013	1277	588	1210	1181	950	2051	1218.81
418	PI 38:1|PI 20:0_18:1	0.0210199	0.163853	18	6	4514.52	0.916396	1	20	6	13287.5	0.0953417	0.678766	19	6.01667	9123.69	4656.86	0.510414	6900	4526	4152	5735	13286	10231	13283	16350	4862	6657	7738	1262	7648	9907	6204	18209	8559.38
501	TG 59:2	0.0210199	0.163853	24	15	815.117	0.57365	1	20.8511	12	8160	0.0653308	0.598523	22.4255	13.461	5215.28	3464.01	0.664204	3017	2936	3537	3401	3382	3534	3451	3666	4006	9575	15672	3387	5872	4088	4064	8573	5135.06
531	unknown1013	0.0210199	0.163853	18	15	4689.89	0.786988	1	20	12	13691	0.0843964	0.646655	19	13.6167	6943.96	8244.23	1.18725	10425	5536	7364	9663	2299	2268	2482	4567	9349	15440	24896	5079	2448	2020	1844	4146	6864.12
605	unknown1080	0.0210199	0.163853	18	15	9532.86	0.951932	1	20	12	21659	0.0982775	0.678766	19	13.6167	12080.5	13244.6	1.09637	19434	13142	12171	20273	3951	4754	3597	7151	15817	29451	36147	5221	5407	3629	2769	8321	11952.2
607	unknown1082	0.0210199	0.163853	18	15	5937.05	0.900532	1	20	12	16414.5	0.0940217	0.678766	19	13.6167	9252.1	9374.66	1.01325	15187	9108	10971	12223	4136	4695	3847	6167	13154	19383	26205	6916	3592	2680	2143	6174	9161.31
634	unknown1106	0.0210199	0.163853	18	15	4941.97	0.876975	1	20	12	13089.5	0.0920509	0.678766	19	13.6167	7517.78	7321.72	0.97392	12209	7249	8520	9766	3665	3778	2280	5341	10888	16200	20075	5195	3006	2642	1929	6407	7446.88
650	unknown1120	0.0210199	0.163853	24	18	2559.73	0.264681	1	20	12	8838.25	0.0344469	0.447199	22	14.85	4843.2	4971.99	1.02659	2835	3684	2438	3532	1263	1883	1203	2801	3820	10002	15909	5622	7826	2920	3189	9304	4889.44
651	unknown1121	0.0210199	0.163853	18	15	9316.13	0.85139	1	20	12	25363.2	0.0898952	0.670481	19	13.6167	14276.6	14365.6	1.00624	23032	12430	17259	17853	5481	7039	4611	10226	21477	31356	39634	8986	5659	4765	3794	12597	14137.4
697	unknown1163	0.0210199	0.163853	18	15	8244.87	0.294684	1	20	12	45056.8	0.0376865	0.463264	19	13.6167	23398.1	21595.4	0.922956	12786	16047	11983	15853	5034	8584	5932	12553	19662	49834	85936	24795	32592	12057	13898	43477	23188.9
736	unknown1199	0.0210199	0.163853	24	15	1094.78	0.45025	1	21.0501	12	7695.25	0.0535696	0.546654	22.5251	13.4595	4461.22	3904.66	0.875246	2616	1720	1387	2579	3120	3148	3322	3897	4149	9629	14435	2568	3760	2932	3522	7216	4375
787	unknown1244	0.0210199	0.163853	18	6	1432.6	0.979382	1	20	5.99999	3931	0.100526	0.683378	19	6.01666	2645.67	1529.6	0.578151	1469	940	1097	1184	3755	2940	4143	4886	1402	1775	2180	818	2012	2802	2161	5801	2460.31
900	unknown1346	0.0210199	0.163853	18	6	1611.14	0.910643	1	20	6.00001	7600.75	0.0948637	0.678766	19	6.01667	6334.6	1350.59	0.213208	6488	5791	4218	5054	7328	7171	7322	8582	4888	4583	6584	3872	6512	6195	4936	9211	6170.94
963	unknown1402	0.0210199	0.163853	18	6	4196.68	0.791424	1	20	6	12919	0.0847786	0.647374	19	6.01666	9305.67	4052.18	0.435453	8231	5897	4799	5489	12078	10971	12218	16409	5099	6880	10508	4133	9111	7916	6616	14679	8814.62
972	unknown1410	0.0210199	0.163853	24	3	16426.6	0.10107	1	20.464	5.02e-05	65733	0.015199	0.304985	22.232	1.38953	51502.8	20430.7	0.396691	81259	69458	55197	57018	56807	63335	58805	70964	47794	25201	26049	21265	51594	46236	34526	73305	52425.8
1035	unknown1468	0.0210199	0.163853	24	3	8880.91	0.109594	1	20.5594	6.63e-05	35778.2	0.0162944	0.304985	22.2797	1.39252	26034.4	14105.9	0.541817	44961	36175	31429	30548	24746	28948	35125	36451	27143	6764	7245	7596	30098	23969	17354	37838	26649.4
1118	unknown1542	0.0210199	0.163853	24	15	1473.43	0.486994	1	21.4599	12	8030	0.0571383	0.557231	22.7299	13.4582	4895.05	3684.77	0.752753	2504	2407	2061	3012	3192	3309	3273	4384	2674	10402	14547	4497	6217	2949	3477	8257	4822.62
1123	unknown1547	0.0210199	0.163853	24	15	1041.57	0.61037	1	21.253	12	7030.5	0.0687166	0.598523	22.6265	13.4585	4156.19	3353.32	0.806824	2154	2193	1573	2307	2290	2561	2561	3236	2265	7468	14827	3562	5352	2461	2894	7673	4086.06
1153	unknown1574	0.0210199	0.163853	18	3	6736.25	0.532057	1	20	6.63e-05	16397.5	0.0614357	0.581954	19	1.58336	12088.5	9054.07	0.748979	19317	23030	12568	10675	9605	7458	23904	11597	11347	2310	557	1831	35423	12112	13761	22490	13624.1
1162	unknown1582	0.0210199	0.163853	18	15	2315.42	0.957424	1	20	12	8186.75	0.0987287	0.678766	19	13.6167	4917.73	4302.64	0.874924	6395	7158	4670	5389	2404	1984	2212	3536	4368	6893	16830	4656	3788	1837	1763	4134	4876.06
1170	unknown159	0.0210199	0.163853	18	6	38821.9	0.805129	1	20	6	89155	0.0859562	0.654141	19	6.01667	48788.7	46405.2	0.951147	15901	5120	6395	9779	71831	56930	106903	120956	9325	29411	41171	3262	27355	42410	27620	116276	43165.3
1191	unknown1608	0.0210199	0.163853	24	3	1536.19	0.264812	1	20.6557	6.63e-05	5541.24	0.0344612	0.447199	22.3279	1.39553	4036.08	2216.01	0.54905	6342	4266	6806	4751	3589	4041	3366	7513	3564	1003	2021	1266	3416	3900	3365	6858	4129.19
1245	unknown1657	0.0210199	0.163853	18	15	19268.7	0.921559	1	20	12	51103.5	0.09577	0.678766	19	13.6167	24883.6	33132.3	1.33149	44782	31493	17106	33443	6456	6492	4772	15309	15631	62004	103174	23605	8547	2988	3656	13546	24562.8
1281	unknown169	0.0210199	0.163853	18	6	2369.16	0.992917	1	20	6	17089.8	0.101629	0.683378	19	6.01667	15401.8	2002.43	0.130013	13157	12945	13425	13903	17376	16495	17671	16817	14285	13132	14043	11065	16236	17828	14783	19385	15159.1
1345	unknown188	0.0210199	0.163853	24	15	5291.28	0.612767	1	20.5594	12	51909.8	0.068936	0.598523	22.2797	13.4645	28896.4	27840.3	0.963452	14016	11394	13020	15175	17450	16735	21922	21005	17388	64004	108557	17690	25186	16603	20250	50988	28211.4
1388	unknown226	0.0210199	0.163853	18	6	2220.49	0.99965	1	20	6	12979	0.102176	0.684733	19	6.01667	11628.8	1663.64	0.143063	12415	8119	8484	10075	12531	13540	13391	12454	10288	10925	10176	7774	12361	13357	12332	14613	11427.2
1412	unknown248	0.0210199	0.163853	24	15	3778.78	0.895254	1	28	12	17066.8	0.0935813	0.678766	26	13.6964	13160.9	4132.1	0.313969	6108	5145	4208	5215	14923	8023	6803	26485	9535	19051	30195	9486	9114	8935	13548	36318	13318.2
1521	unknown346	0.0210199	0.163853	18	6	1210.21	0.992392	1	28	6	21986.5	0.101586	0.683378	23	6.29762	21249.1	58.3393	0.0027455	19658	20257	19915	20202	21640	21545	23242	21519	20517	19888	19482	18219	22761	24565	21530	25013	21247.1
1673	unknown483	0.0210199	0.163853	18	6	1800.82	0.948387	1	20	5.99999	5053	0.097986	0.678766	19	6.01666	3488.83	1849.69	0.530176	2005	1364	1682	1883	5130	3746	5055	6281	2136	2514	2862	988	3248	3820	3188	6333	3264.69
1728	unknown532	0.0210199	0.163853	24	12	6241.99	0.211951	1	24.0327	12	38550.2	0.0285742	0.410966	24.0163	12	30891.1	8020.79	0.259647	26522	18272	22688	25398	31367	25331	26620	42461	34634	35392	45455	38720	25243	28978	27128	40118	30895.4
1734	unknown538	0.0210199	0.163853	18	12	1234.61	0.104901	1	20	12	13007.8	0.0156931	0.304985	19	12.0333	6335.06	6985.18	1.10262	3488	2618	1925	3563	3570	3942	3148	3311	3560	15735	16349	16387	1861	2055	1766	4880	5509.88
1861	unknown652	0.0210199	0.163853	18	6	4415.88	0.954492	1	20	5.99998	11774.5	0.0984879	0.678766	19	6.01666	8239.51	4198.94	0.50961	5648	2978	3923	4387	10805	10040	13859	12394	4562	6648	7791	2300	7070	8838	7404	15044	7730.69
1904	unknown691	0.0210199	0.163853	18	6	2248.25	0.108811	1	20	6	6746	0.0161943	0.304985	19	6.01667	4035.9	2643.45	0.654985	5090	1453	2927	2665	5543	5610	7585	8246	2487	2474	2516	1030	1339	3025	2222	5237	3715.56
1964	unknown745	0.0210199	0.163853	18	15	7605.29	0.832259	1	20	12	22811.8	0.0882728	0.665008	19	13.6167	12565.6	12722.5	1.01249	18626	10487	13116	17204	5812	5932	4704	8531	16275	26416	39785	8771	4947	4935	3999	9538	12442.4
1978	unknown758	0.0210199	0.163853	18	15	5974.88	0.903432	1	20	12	19096.5	0.0942635	0.678766	19	13.6167	11154.9	10235.2	0.917551	17163	10699	11832	14302	4282	5713	4608	8991	12801	24598	31616	7371	5433	4414	3420	9650	11055.8
1985	unknown764	0.0210199	0.163853	18	6	2190.79	0.965615	1	20	5.99998	5316.5	0.0994005	0.680348	19	6.01666	3533.91	2149.52	0.608253	1830	1356	1115	1263	4525	4448	5918	6375	1532	1941	3168	1353	3471	3217	4022	6841	3273.44
2009	unknown786	0.0210199	0.163853	18	15	1496.95	0.993414	1	20	12	6514	0.10167	0.683378	19	13.6167	5094.78	2172.09	0.426337	6555	5759	5445	6787	4227	3844	2982	4741	6647	8038	6031	5340	3821	3130	2810	5023	5073.75
2053	unknown825	0.0210199	0.163853	18	12	1802.95	0.31852	1	20	12	7038.25	0.0402141	0.480216	19	12.0333	4640.96	2694.72	0.580638	5410	3179	3459	5315	3719	3548	2286	3505	5719	8299	8034	6101	2139	1830	2353	4266	4322.62
2093	unknown861	0.0210199	0.163853	18	15	2286.78	0.959109	1	20	12	5735.5	0.0988671	0.678766	19	13.6167	3567.3	3096.36	0.867985	6400	3537	4024	4896	1525	1683	1618	2781	4888	7099	8238	2717	1704	1357	1330	2800	3537.31
2108	unknown875	0.0210199	0.163853	24	15	932.32	0.606138	1	25.8651	12	4095.25	0.0683289	0.598523	24.9326	13.5751	3087.24	941.501	0.304965	2341	1571	2040	1677	2642	2176	2008	3289	2632	4530	5327	3892	2109	2476	3250	7697	3103.56
2187	unknown946	0.0210199	0.163853	18	15	2665.62	0.895534	1	20	12	7963.75	0.0936046	0.678766	19	13.6167	5048.93	3968.63	0.786033	7434	5098	5227	7273	2471	2968	1285	5074	8792	8622	10128	4313	2413	1911	1905	5254	5010.5
2188	unknown947	0.0210199	0.163853	18	15	2593.67	0.924172	1	20	12	8613.25	0.0959865	0.678766	19	13.6167	5559.91	4075.58	0.733031	8103	5095	6063	7504	2350	3881	2273	5197	7076	10141	13068	4168	3497	2869	2291	4751	5520.44
2200	unknown958	0.0210199	0.163853	24	15	2329.92	0.437283	1	21.8859	12	14058.8	0.0522954	0.543549	22.9429	13.4595	8291.87	6874.28	0.829038	3570	2859	3255	4622	7339	5507	6273	6867	6451	17852	26203	5729	8320	5232	6699	14037	8175.94
2204	unknown961	0.0210199	0.163853	18	6	1626.7	0.904598	1	20	5.99999	5296.75	0.0943606	0.678766	19	6.01666	3907.42	1597.67	0.408882	3011	2460	1950	2667	4669	4939	6166	5413	2620	3131	4056	1355	3344	3633	3460	6547	3713.81
2223	unknown979	0.0210199	0.163853	24	15	2073.77	0.484348	1	24.9858	12	9122.75	0.0568833	0.557231	24.4929	13.5357	6371.2	3077.73	0.483068	3495	3362	2641	4013	4746	4989	6688	6214	4232	11360	15823	5076	8746	5011	5600	10386	6398.88
10	CAR 18:2	0.0299489	0.204986	24	12	1072.33	0.666718	1	24.1644	12	4407.25	0.0981133	0.678766	24.0822	12.0001	2775.13	1785.61	0.643434	1393	940	1298	866	2803	1629	1194	6448	1988	4909	7766	2966	1322	1628	2238	5091	2779.94
16	Cer 26:2;2O|Cer 14:2;2O/12:0	0.0299489	0.204986	18	15	2735.44	0.997256	1	20	12	5692.5	0.134729	0.787253	19	13.6167	3390.93	3645.75	1.07515	7719	5129	3978	4038	870	634	998	2917	5325	6695	8854	1896	1538	592	410	2097	3355.62
20	Cer 28:2;2O|Cer 16:2;2O/12:0	0.0299489	0.204986	18	15	4927.83	0.998875	1	20	12	11403.2	0.134899	0.787253	19	13.6167	6836.81	7053.6	1.03171	15217	11054	7985	7084	2081	1287	1835	7370	9319	13151	18603	4540	2515	1357	1170	3728	6768.5
31	Cer 34:0;3O|Cer 14:0;2O/20:0;(2OH)	0.0299489	0.204986	18	6	870.802	0.975012	1	20	6	3079.5	0.132383	0.787253	19	6.01667	2378.08	852.675	0.358556	1582	1568	1371	1632	3199	2607	2551	3961	1324	2215	2995	1248	2482	2108	1980	3573	2274.75
163	HexCer 34:0;2O	0.0299489	0.204986	18	6	311.834	0.999907	1	20	6.00001	1068.5	0.135008	0.787253	19	6.01667	834.047	299.529	0.359127	548	463	445	507	1009	849	974	1442	471	699	882	413	764	950	820	1528	797.75
176	LPC 15:0	0.0299489	0.204986	18	15	798.324	0.13788	1	20	12	3351.5	0.026798	0.393213	19	13.6167	1556.13	1665.42	1.07023	1478	694	542	967	917	356	342	1476	1694	3363	5100	3249	453	393	1054	2562	1540
317	PC P-36:1 or PC O-36:2 A	0.0299489	0.204986	18	15	136978	0.882965	1	20	12	368677	0.122507	0.772553	19	13.6167	191787	222488	1.16008	361889	154751	174413	247736	58281	70210	51440	135267	235989	495164	638509	105045	64501	55055	25773	160099	189633
320	PC P-38:2 or PC O-38:3	0.0299489	0.204986	18	15	50099.9	0.847979	1	20	12	132756	0.11868	0.754175	19	13.6167	69734.2	78898.2	1.13141	129807	56046	65693	84777	20465	25284	19269	52526	95998	175345	220007	39675	21489	19943	10716	66482	68970.1
353	PE 38:3|PE 20:0_18:3	0.0299489	0.204986	18	6	403.758	0.963803	1	20	6	1385.25	0.131195	0.787253	19	6.01667	1012.08	407.568	0.402704	1055	764	488	502	1400	964	1265	1912	483	742	950	342	947	989	661	1939	962.688
424	PI O-36:3	0.0299489	0.204986	18	15	8046.88	0.9977	1	20	12	14539.5	0.134776	0.787253	19	13.6167	8421.89	10256.9	1.21789	15608	14644	10616	15147	1643	2106	1268	4263	10860	17879	25757	3662	3261	1384	974	4089	8322.56
517	unknown1000	0.0299489	0.204986	18	6	382.191	0.983261	1	28	5.99998	3764	0.133255	0.787253	23	6.29761	3604.25	72.695	0.0201693	3517	3327	2889	3469	3619	3774	3892	3771	3321	2834	3187	2851	4594	4334	3304	5025	3606.75
633	unknown1105	0.0299489	0.204986	24	6	1423.23	0.160472	1	21.7778	6	4405.5	0.0304597	0.430076	22.8889	6.01417	2921.64	1033.44	0.353719	5801	1660	2842	3104	4128	3829	4641	5024	3161	1789	1866	1328	1098	1904	1128	2859	2885.12
648	unknown1119	0.0299489	0.204986	18	15	5037.43	0.787847	1	20	12	17080	0.112	0.725958	19	13.6167	9425.76	9152.73	0.971033	13132	7847	9952	11447	3857	4511	3923	7813	12339	20093	29443	6445	4351	3554	2319	8368	9337.12
753	unknown1213	0.0299489	0.204986	18	15	1957.8	0.991061	1	20	12	6005.5	0.134077	0.787253	19	13.6167	4330.92	2508.66	0.579244	6187	4615	5571	5667	2992	2801	2597	3881	6888	6263	6995	3876	2591	2163	2079	3740	4306.62
785	unknown1242	0.0299489	0.204986	18	12	369.463	0.538972	1	20	12	2918.5	0.0827478	0.640582	19	12.0333	2134.39	940.316	0.440554	1955	1486	1234	2190	2484	2365	1507	2208	1675	3423	4514	2062	912	1776	1035	1547	2023.31
806	unknown1261	0.0299489	0.204986	18	15	3004.5	0.737401	1	20	12	9487	0.10629	0.701824	19	13.6167	4267.89	5990.61	1.40365	6590	2896	3680	5157	796	1317	954	2470	5472	12466	18257	1753	746	1078	552	3174	4209.88
834	unknown1287	0.0299489	0.204986	18	15	3275.67	0.835682	1	20	12	10926	0.117325	0.752553	19	13.6167	6741.12	5323.36	0.789686	9226	6349	7745	8583	3509	3582	4017	5539	9691	12106	16532	5375	3437	3012	2780	5550	6689.56
868	unknown1317	0.0299489	0.204986	18	15	2874.04	0.831289	1	20	12	9182	0.116839	0.751586	19	13.6167	5514.06	4562.09	0.827356	8288	5283	4902	6321	3142	2940	2235	3968	7115	11427	14961	3225	3522	2887	1484	5818	5469.88
879	unknown1327	0.0299489	0.204986	18	15	4008.41	0.3943	1	20	12	25528.2	0.0642273	0.598523	19	13.6167	13607.4	11784.9	0.866067	7922	8840	6582	9603	3327	5100	3664	8242	9859	28913	50451	12890	18884	7278	7888	26449	13493.2
908	unknown1353	0.0299489	0.204986	18	15	2823.12	0.997904	1	20	12	6136.5	0.134797	0.787253	19	13.6167	4044.13	3660.22	0.905068	7363	6546	5206	5716	1504	1763	1174	2919	4555	7212	9054	3725	2552	1335	902	2613	4008.69
924	unknown1368	0.0299489	0.204986	24	18	1779.79	0.334517	1	21.3559	12	6468.5	0.0561366	0.557231	22.678	14.8757	4404.57	2803.35	0.636464	3129	3561	2573	3127	2270	2249	2073	3708	3543	6456	10960	4915	7022	3575	3350	8120	4414.44
967	unknown1406	0.0299489	0.204986	18	15	1277.03	0.202252	1	20	12	5880	0.0369886	0.46133	19	13.6167	3349.31	2639.61	0.788106	2418	2428	2113	2642	909	1280	743	2618	2917	6315	9870	4418	5049	2211	1984	5265	3323.75
976	unknown1414	0.0299489	0.204986	18	15	27863.9	0.998392	1	20	12	68775	0.134849	0.787253	19	13.6167	46492.8	38191.4	0.821448	77926	73110	63859	58998	18217	24347	13765	39377	55315	74249	103905	41631	28834	15718	10704	38012	46122.9
997	unknown1433	0.0299489	0.204986	18	12	1374.62	0.48108	1	20	12	5574.75	0.0754968	0.598523	19	12.0333	3832.67	2071.1	0.540382	4671	3548	1606	3596	3855	4588	2391	2690	3323	5871	7177	5928	2021	2127	1055	2961	3588
1003	unknown1439	0.0299489	0.204986	18	12	914.289	0.502284	1	20	12	5001.75	0.0781755	0.607281	19	12.0333	3093.94	2179.25	0.704361	3110	2670	1156	2767	2935	3465	1660	1900	2236	6342	7851	3578	1277	1415	650	2372	2836.5
1030	unknown1463	0.0299489	0.204986	18	15	9963.84	0.995827	1	20	12	21617.8	0.134579	0.787253	19	13.6167	13622.8	13437.9	0.986429	24563	20987	19543	19511	5074	5436	3647	9164	17980	23082	32092	13317	6208	3942	2443	8893	13492.6
1053	unknown1484	0.0299489	0.204986	18	6	1307.44	0.984946	1	20	6	6131	0.133433	0.787253	19	6.01667	5021.18	1261.46	0.251228	4548	4249	3525	3395	6198	5119	5413	7794	3426	3700	5456	3008	5459	4817	4228	7558	4868.31
1065	unknown1495	0.0299489	0.204986	18	15	14049	0.997746	1	20	12	31141.8	0.134781	0.787253	19	13.6167	19500.4	19564.1	1.00327	36149	30536	26957	28950	7340	7222	5223	13727	24983	33930	46851	18803	7809	5400	3686	11409	19310.9
1087	unknown1514	0.0299489	0.204986	18	6	438.76	0.999027	1	28	6	2113.75	0.134915	0.787253	23	6.29762	1902.91	28.2428	0.0148419	1497	1974	1342	1468	2136	2088	1958	2273	1260	1086	1465	1952	2813	2224	1794	3101	1901.94
1099	unknown1525	0.0299489	0.204986	18	15	36477	0.998036	1	20	12	83833	0.134811	0.787253	19	13.6167	53703.7	50939.9	0.948537	97205	85469	70409	79076	22040	21816	15940	38809	69480	89410	124455	51987	23441	16362	11526	33941	53210.4
1227	unknown1640	0.0299489	0.204986	18	15	4164.33	0.82935	1	20	12	9768.5	0.116624	0.751586	19	13.6167	5176.98	5955.05	1.15029	8907	4377	4712	7475	2045	2075	1544	1711	6773	14031	15696	2574	2037	1591	1318	5043	5119.31
1361	unknown201	0.0299489	0.204986	18	6	2266.98	0.986494	1	20	6.00001	13461.2	0.133596	0.787253	19	6.01667	11663.2	1953.06	0.167455	10231	8384	10529	11574	13423	12826	14970	12626	9406	10076	12028	7057	10367	11468	10270	17590	11426.6
1416	unknown251	0.0299489	0.204986	18	6	2566.27	0.991394	1	20	6	13246	0.134112	0.787253	19	6.01667	11263.1	2180.07	0.19356	10654	7405	8242	11888	12527	13145	14500	12812	9446	10097	11505	5389	10970	11946	8555	16901	10998.9
1437	unknown270	0.0299489	0.204986	18	6	6283	0.955163	1	20	6.00001	19086.5	0.130276	0.787253	19	6.01667	13297.9	6935.45	0.521546	9338	4981	4956	7198	17807	13854	19979	24706	10043	9840	11902	4527	10534	14205	11161	24288	12457.4
1516	unknown341	0.0299489	0.204986	24	15	4162.91	0.578493	1	20.7529	12	35884.8	0.0875893	0.662081	22.3765	13.462	19255	20154.7	1.04673	8309	5666	6310	10019	11333	10866	14847	15943	12747	44668	75352	10772	16656	10860	11641	34460	18778.1
1822	unknown617	0.0299489	0.204986	18	9	2407.35	0.992915	1	20	6	7004	0.134273	0.787253	19	7.6	5029.25	1594.81	0.317107	2781	2217	2064	2084	7231	5673	5954	9158	2714	4838	5837	2215	3903	4350	4124	10309	4715.75
2032	unknown806	0.0299489	0.204986	18	6	661.322	0.982123	1	20	5.99999	5334.25	0.133135	0.787253	19	6.01666	4791.41	567.145	0.118367	4767	3892	4505	4420	4948	4924	6246	5219	3998	3899	4721	3449	4093	5173	4503	6806	4722.69
2145	unknown908	0.0299489	0.204986	18	15	3613.85	0.789707	1	20	12	10810.8	0.112208	0.725958	19	13.6167	6383.12	5595.12	0.876549	10587	4914	6200	8281	2762	3926	1711	5715	10358	12968	14818	5099	2746	2189	2381	6608	6328.94
2203	unknown960	0.0299489	0.204986	18	15	5820.2	0.901257	1	20	12	17043	0.124492	0.774194	19	13.6167	10674	8539.87	0.800061	15878	10117	12541	13931	4928	5921	5479	8524	14714	20838	24950	7670	4926	5346	4297	9401	10591.3
2210	unknown967	0.0299489	0.204986	18	15	11664.3	0.888215	1	20	12	32941.5	0.123078	0.773464	19	13.6167	17774.1	19589.4	1.10213	30529	15484	21073	23967	7270	7769	6825	11019	23369	40974	54219	13204	4963	4908	4052	11725	17584.4
51	Cer 36:1;4O|Cer 21:0;3O/15:1;(2OH)	0.0419656	0.24924	18	15	14239	0.995344	1	20	12	32071.8	0.174414	0.901267	19	13.6167	19108.4	20758.9	1.08638	34269	30624	26293	28049	6199	6514	4569	12796	22154	32976	54053	19104	7086	4023	3148	10661	18907.4
133	FA 13:0 (tridecylic acid)	0.0419656	0.24924	18	15	3420.98	0.910337	1	20	12	10544.5	0.162929	0.892136	19	13.6167	6057.02	5829.27	0.9624	10128	7121	5511	6656	3348	2448	2085	3839	5463	12182	19095	5438	3990	1437	1450	5818	6000.56
136	FA 15:0 (pentadecylic acid)	0.0419656	0.24924	18	15	3689.68	0.999767	1	20	12	11735.8	0.175004	0.901267	19	13.6167	9110.96	4533.04	0.497537	11978	11535	12355	11192	6246	5719	6186	7590	8537	12884	17643	7879	8674	4948	3561	8146	9067.06
175	LPC 14:1/0:0	0.0419656	0.24924	24	15	6153.6	0.301919	1	20.464	12	25415.8	0.06802	0.598523	22.232	13.4659	12354.1	15969.5	1.29265	4586	3288	2138	4481	10345	4357	3882	12393	8423	30468	45173	17599	4864	3359	8878	27034	11954.2
185	LPC 18:3	0.0419656	0.24924	24	12	1724.46	0.198177	1	20	12	10402.5	0.048149	0.53398	22	12.1	5207.33	4921.35	0.94508	2881	1864	1268	2338	3882	1964	2022	4744	3990	11874	17391	8355	1996	1702	3331	9070	4917
191	LPC P-16:0 or LPC O-16:1	0.0419656	0.24924	24	15	1304.61	0.215662	1	20	12	8426	0.0516319	0.543549	22	13.475	3443.78	6452.47	1.87366	1612	182	1028	1401	1649	1361	721	2486	3160	10435	16006	4103	1030	915	1915	4320	3270.25
312	PC O-38:2|PC O-20:1_18:1	0.0419656	0.24924	18	15	686.954	0.998695	1	20	12	1983.5	0.174861	0.901267	19	13.6167	1468.42	895.184	0.609624	2596	2070	1423	1755	762	821	655	1342	1374	2201	3026	1333	1118	855	381	1644	1459.75
342	PE 36:1	0.0419656	0.24924	18	6	448605	0.887545	1	20	6.00002	1.09014e+06	0.159794	0.881421	19	6.01667	693299	465838	0.671915	400027	187289	215147	284788	952847	788076	1241330	1378288	280725	549056	711319	143347	498795	671925	499846	1386775	636849
405	PI 34:1	0.0419656	0.24924	18	6	119810	0.953205	1	20	6	389271	0.168761	0.901267	19	6.01667	292335	107272	0.36695	261164	204934	171147	201596	389996	334355	376679	456055	168294	253778	372064	46616	275138	252762	209692	495106	279336
440	TG 42:0	0.0419656	0.24924	18	6	340358	0.963145	1	20	6	814950	0.170101	0.901267	19	6.01667	556336	308567	0.554641	331735	219026	178835	337456	580376	898593	967464	813368	189958	475677	786344	127993	459958	346122	521911	1068287	518944
546	unknown1027	0.0419656	0.24924	24	15	3406.13	0.603222	1	24.1644	12	15420.2	0.11838	0.754175	24.0822	13.5053	9478.99	6412.89	0.676538	3817	2599	2910	4560	6029	6897	7043	8216	3956	20410	31795	5520	10744	8176	8493	20649	9488.38
562	unknown1041	0.0419656	0.24924	24	21	637.81	0.466815	1	23.2718	17.9999	4960.25	0.0966329	0.678766	23.6359	19.4815	4198.91	605.455	0.144194	4104	4789	3641	4345	2955	4004	3435	3146	5971	3524	3061	4520	5019	4526	5860	4436	4208.5
609	unknown1084	0.0419656	0.24924	18	15	14394.9	0.904443	1	20	12	39037	0.162121	0.88988	19	13.6167	21344	22915.7	1.07364	34951	19791	25730	28177	7873	8905	7766	15545	29573	48917	64742	12916	7176	5756	3872	16264	21122.1
629	unknown1101	0.0419656	0.24924	18	15	5216.5	0.940981	1	20	12	17562.5	0.167106	0.901267	19	13.6167	10537.5	8803.56	0.83545	16436	9904	10948	13027	5645	5820	5664	9000	13065	22239	28581	6365	3782	4273	2643	9844	10452.2
748	unknown1209	0.0419656	0.24924	18	15	4344.11	0.91957	1	20	12	11957.2	0.164192	0.896056	19	13.6167	6846.94	6493.15	0.948328	11728	4941	6345	9710	3021	3017	2924	5096	8333	15463	20362	3671	2596	3107	1889	6342	6784.06
810	unknown1265	0.0419656	0.24924	24	15	4271.28	0.39227	1	20	12	32869.2	0.0840659	0.646655	22	13.475	17943.6	18401	1.02549	9963	8125	9639	10533	9657	8371	8514	13167	11836	49332	55893	14416	19812	8545	11433	29943	17448.7
842	unknown1294	0.0419656	0.24924	18	12	697.207	0.542678	1	20	12	4658	0.108908	0.712821	19	12.0333	3710.25	1090.42	0.293894	4190	3687	2284	2975	3893	3806	3240	3136	3243	4366	5108	5915	3021	2798	1918	3723	3581.44
927	unknown1370	0.0419656	0.24924	18	15	3341.43	0.834157	1	20	12	11648	0.152354	0.858003	19	13.6167	6963.93	5730.11	0.822828	10278	5665	7513	8455	3627	5590	2095	5763	9896	14480	17462	4754	2702	3417	2620	6218	6908.44
986	unknown1423	0.0419656	0.24924	18	15	2212.54	0.24455	1	20	12	14505	0.057258	0.557231	19	13.6167	10597.5	3852.62	0.36354	12062	9521	8178	8255	7297	6729	8775	11642	13840	13627	18420	12133	11910	8995	6182	11397	10560.2
998	unknown1434	0.0419656	0.24924	18	15	4026.62	0.921408	1	20	12	18127.8	0.164443	0.896056	19	13.6167	12264.2	7261.09	0.592056	14817	13846	11904	15929	10172	10297	4984	11909	9715	17151	21762	23883	7751	5498	5087	10397	12193.9
1011	unknown1446	0.0419656	0.24924	24	15	1911.84	0.648126	1	21.6708	12	14704.2	0.12524	0.776694	22.8354	13.4585	8091.36	7568.11	0.935333	3099	2146	2560	4003	4160	5024	4078	5248	3989	20678	29839	4311	7192	3909	5852	21157	7952.81
1039	unknown1471	0.0419656	0.24924	18	6	1180.16	0.996237	1	20	5.99998	5813	0.174533	0.901267	19	6.01666	4549.67	1521.87	0.334502	3687	2684	2500	3300	4678	4536	5485	8553	4259	2718	3035	3997	4952	4324	3854	7282	4365.25
1079	unknown1507	0.0419656	0.24924	18	15	2667.38	0.937688	1	20	12	9821.5	0.166659	0.901267	19	13.6167	5842.32	4957.27	0.848511	9482	6923	4833	6898	3014	2201	2402	7163	7178	10723	16113	5272	2902	1723	1275	4607	5794.31
1095	unknown1521	0.0419656	0.24924	18	15	36107.7	0.999098	1	20	12	108114	0.174914	0.901267	19	13.6167	76567.1	50174.7	0.655304	119123	104493	88381	97351	46149	46515	33123	70148	83478	121530	166559	60888	47865	30948	23503	77245	76081.2
1147	unknown1569	0.0419656	0.24924	18	6	1671.25	0.352733	1	20	5.99998	6937.75	0.0771655	0.605722	19	6.01666	5277.95	1615.51	0.306087	5779	4803	4154	3826	6694	5909	7332	7816	3938	3851	5618	2132	5035	4422	3112	6894	5082.19
1167	unknown1587	0.0419656	0.24924	18	6	5252.21	0.838907	1	20	6.00002	11723.5	0.153022	0.858834	19	6.01667	6554.84	6107.33	0.931728	807	1161	908	1064	10738	8215	14567	13374	816	4051	7624	1043	4384	6552	2463	15269	5814.75
1188	unknown1605	0.0419656	0.24924	24	18	2227.74	0.42511	1	20	12	17142.2	0.0896693	0.670481	22	14.85	5997.6	11191.8	1.86605	2094	1997	1239	1952	979	1335	992	1719	2568	23326	38114	4561	5539	2052	1676	7484	6101.69
1200	unknown1616	0.0419656	0.24924	18	15	2087.2	0.830303	1	20	12	7513.75	0.151811	0.858003	19	13.6167	3861.34	4100.51	1.06194	7581	1742	1819	4556	1607	1729	1528	2782	3734	10393	13748	2180	1464	1730	1183	3370	3821.62
1240	unknown1652	0.0419656	0.24924	24	12	1322.64	0.221482	1	20	12	9873.75	0.0527779	0.543549	22	12.1	4424.62	5694.28	1.28695	1972	1699	972	1947	3195	4455	1436	2695	1923	9216	10026	18330	1240	2261	1459	2593	4088.69
1252	unknown1663	0.0419656	0.24924	18	6	1567.66	0.999999	1	28	6	4558.75	0.175034	0.901267	23	6.29762	3523.6	913.444	0.259236	2423	1923	1720	2406	4325	4772	5398	3740	2304	2156	5285	1799	3082	3068	2835	8638	3492.12
1299	unknown1705	0.0419656	0.24924	18	15	3425.93	0.999287	1	20	12	5339.5	0.17494	0.901267	19	13.6167	2918.8	4683.92	1.60474	8179	6323	3941	6174	0	0	0	0	4306	5163	8119	3770	0	0	0	0	2873.44
1317	unknown1721	0.0419656	0.24924	24	15	8828.94	0.45299	1	20	12	62715	0.0943425	0.678766	22	13.475	27547.3	43595.6	1.58257	5675	7347	2456	7631	20929	17665	13195	15940	6180	82656	136427	25597	25893	10485	13693	30229	26374.9
1402	unknown239	0.0419656	0.24924	18	9	4358.43	0.998784	1	20	6	30225.8	0.174873	0.901267	19	7.6	26842.2	2866.72	0.106799	23150	19861	20895	23791	30373	26407	30951	33172	25662	27141	29330	18237	24446	26151	23498	37393	26278.6
1599	unknown416	0.0419656	0.24924	18	9	2022.86	0.933354	1	20	6	7106.75	0.166071	0.900552	19	7.6	5455.45	1434.92	0.263025	3760	3359	2196	3870	7269	7830	6447	6881	3983	4923	7224	2736	3981	4354	5313	8648	5173.38
1690	unknown499	0.0419656	0.24924	18	6	19877.5	0.948434	1	20	6	48027.5	0.168116	0.901267	19	6.01667	32085.2	19302.8	0.601609	17353	11083	10231	13844	43304	38354	51656	58796	16081	21324	39779	8329	26665	31816	26126	61197	29746.1
1705	unknown511	0.0419656	0.24924	18	9	1673.01	0.958045	1	20	6	8053.5	0.169414	0.901267	19	7.6	6490.41	1175.31	0.181084	5398	4359	3277	5374	7317	7941	8902	8054	4565	6411	7459	3602	6020	6243	6365	8863	6259.38
1778	unknown578	0.0419656	0.24924	18	6	2016.31	0.77895	1	20	5.99999	5047.25	0.144509	0.831854	19	6.01666	2941.71	2360.87	0.802549	1907	526	672	1239	3606	3560	5665	7358	1324	2128	2258	93	2299	2359	1174	6322	2655.62
1828	unknown622	0.0419656	0.24924	18	6	2002	0.999313	1	28	6	4657.5	0.174943	0.901267	23	6.29762	3341.08	613.765	0.183702	1442	809	910	1431	5246	4455	5311	3618	1201	1724	1719	550	4152	4496	4974	11081	3319.94
1941	unknown724	0.0419656	0.24924	18	15	627.911	0.985786	1	20	12	4097.75	0.173139	0.901267	19	13.6167	3740.21	757	0.202395	3412	5651	3395	4274	2979	3005	2962	3416	4982	3647	3877	3885	3102	4055	3384	3700	3732.88
2018	unknown794	0.0419656	0.24924	24	15	8235.67	0.541819	1	21.5648	12	54320.5	0.108771	0.712821	22.7824	13.4583	31487.6	27024.6	0.858261	13248	10790	11224	19508	23758	17635	26173	23296	18191	69929	106532	22630	30633	23854	20509	57679	30974.3
2025	unknown80	0.0419656	0.24924	18	6	52779.3	0.89044	1	20	6	126378	0.160194	0.881459	19	6.01667	82035.1	52695.8	0.642357	49462	22022	26833	34803	111645	96868	137247	159753	34277	71251	98766	16992	57975	77739	57077	157680	75649.4
2039	unknown812	0.0419656	0.24924	24	15	3055.59	0.555819	1	24.5682	12	12105.5	0.110987	0.724318	24.2841	13.5194	7503.4	4690.96	0.625178	2521	2299	2047	3716	4742	5905	5065	5168	3297	16033	24829	4263	9468	5864	7678	17544	7527.44
2044	unknown817	0.0419656	0.24924	24	12	1898.58	0.250772	1	21.5648	12	9764.25	0.0584503	0.565608	22.7824	12.0344	5842.86	4060.73	0.694991	3336	2148	2101	2965	5100	5923	4072	6842	4432	13948	14737	5940	2086	5654	4694	7038	5688.5
2045	unknown818	0.0419656	0.24924	18	6	2062.28	0.996478	1	20	5.99999	5593.5	0.174566	0.901267	19	6.01666	4003.51	1923.33	0.480412	2118	2535	1530	1996	5552	4418	5899	6505	2469	2922	3560	931	3426	5391	2883	8192	3770.44
2062	unknown833	0.0419656	0.24924	18	15	9776.1	0.465386	1	20	12	48074.8	0.0963971	0.678766	19	13.6167	26222.8	22894.6	0.873079	29019	18731	25795	23821	15030	14789	10159	25549	35700	65848	70717	20034	10997	10594	10957	28277	26001.1
2086	unknown855	0.0419656	0.24924	24	15	1090.36	0.510557	1	20.9501	12	8037.25	0.103769	0.691847	22.4751	13.4602	4420.94	4360.84	0.986406	1782	1499	1330	2786	3082	2410	3159	3441	3049	10080	15987	3033	3780	2501	3103	8134	4322.25
2090	unknown859	0.0419656	0.24924	18	9	1184.05	0.964946	1	28	6	3412	0.170344	0.901267	23	8.21429	2712.48	628.45	0.231689	1389	1343	1473	1818	3401	3320	3219	3708	1921	2750	4895	1558	2280	2254	2320	5293	2683.88
2109	unknown876	0.0419656	0.24924	24	15	1130.66	0.344072	1	20	12	5855.75	0.0756298	0.598523	22	13.475	2542.22	4093.45	1.61019	665	637	380	609	1493	579	387	2252	2016	7628	11557	2222	848	422	1948	5271	2432.12
2131	unknown896	0.0419656	0.24924	18	12	2499.62	0.12544	1	20	12	10064.8	0.0328843	0.445726	19	12.0333	5647.28	4742.22	0.839736	5220	2501	1891	4903	3702	3764	3576	4365	4631	11579	12564	11485	2322	2298	1691	4901	5087.06
2231	unknown986	0.0419656	0.24924	18	15	56298.1	0.862601	1	20	12	180445	0.156335	0.868744	19	13.6167	100611	98197.3	0.976012	160169	81963	94170	125734	40170	43706	35269	82600	116935	225212	315646	63987	43410	42023	17699	105863	99659.8
791	unknown1248	0.0499351	0.294237	24	15	207.182	0.400329	1	20.1831	12	1456	0.0982031	0.678766	22.0915	13.4709	569.459	1075.89	1.88932	0	0	0	134	57	0	0	293	158	1128	2735	1803	0	78	97	2177	541.25
1221	unknown1635	0.0499351	0.294237	18	6	3744.84	0.999703	1	28	6	11705.8	0.199548	0.990139	23	6.29762	7068.85	2127.2	0.300926	0	0	19	0	16542	12086	12899	5296	0	15	31	15	11723	10794	12175	30334	6995.56
1863	unknown654	0.0499351	0.294237	24	15	427.446	0.196181	1	28	17.9999	5465.25	0.0551116	0.550391	26	16.4821	5111.43	18.1037	0.00354182	4694	4728	4491	4853	5554	4837	4728	4862	5434	5471	5475	4801	5326	5320	5319	5896	5111.81

## Sheet: 0.5 cycling in proteinAS
ID	CycID	JTK_pvalue	JTK_BH.Q	JTK_period	JTK_adjphase	JTK_amplitude	LS_pvalue	LS_BH.Q	LS_period	LS_adjphase	LS_amplitude	meta2d_pvalue	meta2d_BH.Q	meta2d_period	meta2d_phase	meta2d_Base	meta2d_AMP	meta2d_rAMP	0	0	0	0	6	6	6	6	12	12	12	12	18	18	18	18	ProteinS
1257	unknown1668	4.22e-05	0.0611596	18	15	5201.48	0.332997	1	20	12	11793.8	0.000170982	0.302705	19	13.6167	7933.69	6499.66	0.819247	13056	9779	9809	9097	4112	1924	3983	1243	13088	11385	13019	9683	6067	5894	6066	7727	7870.75
827	unknown1280	0.000171384	0.0611596	18	6	2209.53	0.461247	1	20	6.00001	8652.5	0.000825715	0.302705	19	6.01667	6777.97	1980.76	0.292235	6323	5319	6873	3393	9304	8398	8475	8433	5371	4468	4855	5282	7599	5526	7170	7818	6537.94
862	unknown1311	0.000171384	0.0611596	18	6	876.459	0.311841	1	20	6	3176.75	0.000579172	0.302705	19	6.01667	2435.71	780.545	0.320459	2280	1950	2356	1175	3273	3042	3197	3195	1920	1720	1676	1859	2643	1948	2593	2631	2341.12
989	unknown1426	0.000171384	0.0611596	18	15	5788.73	0.194256	1	20	12	16178.8	0.000376543	0.302705	19	13.6167	12554.5	6881.51	0.548133	19701	13250	15320	13109	8321	4914	7818	3518	15996	16473	17561	14685	12182	10291	14387	12279	12487.8
1245	unknown1657	0.000171384	0.0611596	18	15	17344.4	0.528316	1	20	12	31144.8	0.000933489	0.302705	19	13.6167	20318.4	19148.1	0.942398	40789	23398	32830	18434	7870	3726	7133	2256	31023	33481	33309	26766	14087	11717	20151	15158	20133
2009	unknown786	0.000171384	0.0611596	18	15	1348.28	0.216697	1	20	12	4918	0.000415982	0.302705	19	13.6167	3691.13	1646.6	0.446095	4322	4086	4537	2665	2592	2044	2927	2536	5285	5299	4489	4599	2763	3565	3991	3103	3675.19
424	PI O-36:3	0.000320124	0.0611596	18	15	4229.91	0.775987	1	20	12	7751.5	0.00231034	0.302705	19	13.6167	4585.59	5165.74	1.12652	8872	5690	9373	3086	1098	542	1686	576	7464	10251	6282	7009	1347	2634	4579	2080	4535.56
908	unknown1353	0.000320124	0.0611596	18	15	2257.79	0.694237	1	20	12	4460.5	0.00209169	0.302705	19	13.6167	2800.06	2652.9	0.947441	4701	3095	5404	2235	1059	730	1238	844	4522	5274	3931	4115	1411	1731	2355	1745	2774.38
976	unknown1414	0.000320124	0.0611596	18	15	17701	0.708133	1	20	12	39556	0.00212906	0.302705	19	13.6167	28471.2	21551.6	0.75696	51196	32963	49439	26344	13037	7750	13938	9144	36117	50656	37055	34396	19027	24103	30381	16654	28262.5
994	unknown1430	0.000320124	0.0611596	18	15	3037.73	0.418394	1	20	12	7760.5	0.00132842	0.302705	19	13.6167	4998.82	3924.48	0.785082	7366	5074	6868	4415	2207	2482	2829	1731	6747	8362	9875	6058	3474	2330	6035	3520	4960.81
2093	unknown861	0.000320124	0.0611596	18	15	1406.79	0.501157	1	20	12	3246.5	0.00156223	0.302705	19	13.6167	2258	1574.64	0.69736	3293	2438	3676	1826	956	915	1341	1134	3610	3588	2671	3117	1354	1747	2440	1778	2242.75
51	Cer 36:1;4O|Cer 21:0;3O/15:1;(2OH)	0.000572095	0.0611596	18	15	10112.3	0.877265	1	20	12	18273.8	0.00431473	0.302705	19	13.6167	12124.1	11496.3	0.948212	26019	15339	23172	9209	3174	2899	5377	2857	17232	19673	17480	18710	6315	7609	11356	5784	12012.8
133	FA 13:0 (tridecylic acid)	0.000572095	0.0611596	18	15	6261.61	0.860085	1	20	12	12277.5	0.00423996	0.302705	19	13.6167	8040.94	7125.16	0.88611	19561	5632	13710	5387	2853	2620	3715	1935	11789	14820	12030	10471	4879	5219	7762	5168	7971.94
136	FA 15:0 (pentadecylic acid)	0.000572095	0.0611596	18	15	5204.48	0.349181	1	20	12	14436.8	0.00190143	0.302705	19	13.6167	10626.9	5735.21	0.539691	15810	8972	14250	9434	6098	5979	7090	5968	12743	16174	15159	13671	10582	8220	11320	7671	10571.3
313	PC O-38:3|PC O-20:1_18:2	0.000572095	0.0611596	18	15	659.024	0.858146	1	20	12	1378.5	0.00423151	0.302705	19	13.6167	967.84	777.264	0.803091	1472	1220	2054	817	417	289	453	332	1386	1690	1112	1326	494	702	998	603	960.312
316	PC P-36:1 or PC O-36:2	0.000572095	0.0611596	18	15	2015.08	0.86127	1	20	12	4511	0.00424512	0.302705	19	13.6167	3347.76	2291.8	0.684576	5099	3885	6808	2792	1707	1060	1881	1487	4490	5134	3734	4686	2135	2305	3615	2391	3325.56
360	PE P-38:2 or PE O-38:3	0.000572095	0.0611596	18	15	3171.2	0.785481	1	20	12	6000.75	0.00391296	0.302705	19	13.6167	3991.19	3653.7	0.915441	7543	4812	7668	3449	1343	995	1723	988	5929	6775	5478	5821	2244	2570	3710	2245	3955.81
916	unknown1360	0.000572095	0.0611596	18	15	178994	0.205951	1	20	12	468438	0.0011837	0.302705	19	13.6167	353595	202588	0.572939	566342	362365	449245	314852	230051	137668	221370	93245	477851	484965	502066	408870	339065	291795	392795	353590	351633
1065	unknown1495	0.000572095	0.0611596	18	15	9787.06	0.844857	1	20	12	18823.2	0.00417352	0.302705	19	13.6167	12381.9	11398.7	0.920599	23535	15869	24015	9019	3730	3452	5944	3474	17349	19246	18947	19751	6146	7683	11848	6336	12271.5
1099	unknown1525	0.000572095	0.0611596	18	15	27084.8	0.827369	1	20	12	52498.2	0.00409704	0.302705	19	13.6167	35103.3	31017.2	0.883598	65479	44244	66318	27085	11555	10358	17942	10063	48813	52970	52647	55563	18238	22601	33380	19590	34802.9
1312	unknown1717	0.000572095	0.0611596	18	15	11765	0.343702	1	20	12	21122	0.00187471	0.302705	19	13.6167	12607.7	13520.7	1.07242	25571	13566	19991	8562	3895	1129	2935	585	24178	19580	23738	16992	8877	8353	10850	10826	12476.8
61	Cer 37:2;3O	0.000987235	0.0714949	18	15	10397.3	0.812623	1	20	12	20806.5	0.00652076	0.357794	19	13.6167	14071.8	11787.7	0.83768	26540	16304	27043	8473	4573	4119	7823	4565	19273	21718	21004	21231	8254	8658	15473	8272	13957.7
321	PC P-38:3 or PC O-38:4 Isomer A	0.000987235	0.0714949	18	15	2701.68	0.611777	1	20	12	5571.5	0.00508057	0.325882	19	13.6167	3868.75	2704.24	0.698995	6126	4606	6179	2149	1817	1317	2046	2071	6311	6623	3686	5666	2162	3661	4149	2912	3842.56
925	unknown1369	0.000987235	0.0714949	18	15	3238.02	0.505948	1	20	12	6964.25	0.00429658	0.302705	19	13.6167	4678.58	3777.48	0.807398	7012	5743	8136	3337	1681	1105	2658	1443	8346	7521	5945	6045	2519	3711	6016	3054	4642
1030	unknown1463	0.000987235	0.0714949	18	15	6883.68	0.872703	1	20	12	12979.5	0.00694141	0.362406	19	13.6167	8782.82	7822.52	0.890661	15373	10800	19583	6096	3264	1960	3766	2468	13336	14176	12056	12350	4204	6852	8894	4135	8707.06
1131	unknown1554	0.000987235	0.0714949	18	15	6211.93	0.657482	1	20	12	13335	0.00541336	0.329717	19	13.6167	9353.43	7059.49	0.754749	15760	9981	17000	7502	3774	2700	5465	3416	12210	14631	14090	12409	5906	7199	10290	6228	9285.06
1132	unknown1555	0.000987235	0.0714949	18	15	9849.47	0.486604	1	20	12	19069.8	0.00415103	0.302705	19	13.6167	12768.2	10974.6	0.859526	23513	15594	20411	10150	4330	3032	5478	3486	18867	19845	19371	18196	7348	10305	14361	8303	12661.9
1613	unknown429	0.000987235	0.0714949	18	15	13674.4	0.582193	1	20	12	30566	0.00486338	0.321126	19	13.6167	19052.7	16755	0.879406	33289	23632	27902	11394	6833	7053	8810	9636	32888	35915	27088	26373	12906	8696	18140	11692	18890.4
1659	unknown470	0.000987235	0.0714949	18	15	2066.52	0.380801	1	20	12	9713.5	0.00334063	0.302705	19	13.6167	8258.6	2256.71	0.273255	8939	8450	11010	7037	5671	6693	6707	6751	9892	9458	9783	9721	7383	9187	7861	7245	8236.75
1978	unknown758	0.000987235	0.0714949	18	15	3706.3	0.418196	1	20	12	8852.25	0.00363001	0.302705	19	13.6167	6074.66	4359.79	0.717702	10260	6609	9139	3161	2697	2265	2777	2563	9699	11198	7095	7417	5448	4168	7065	4958	6032.44
2148	unknown910	0.000987235	0.0714949	18	15	1854.21	0.580328	1	20	12	4759.75	0.00484963	0.321126	19	13.6167	3081.59	2319.84	0.752806	5427	2958	4258	1894	1592	1215	1857	1776	4891	5727	4079	4342	2671	1353	2821	2085	3059.12
75	Cer 39:2;3O	0.00164724	0.0821791	18	15	5378.61	0.924808	1	20	12	9224	0.0114053	0.398658	19	13.6167	6198	5853.46	0.944411	14955	7038	12735	3268	1353	1271	2668	1449	9205	10398	8149	9144	3507	3676	6371	3074	6141.31
76	Cer 39:2;3O|Cer 16:2;2O/23:0;(2OH)	0.00164724	0.0821791	18	15	4865.42	0.884056	1	20	12	8696	0.0109683	0.398658	19	13.6167	5636.44	5434.59	0.964188	12845	6192	11361	2846	1313	1339	2445	1372	8675	9337	7606	9166	3317	3221	5494	2812	5583.81
166	HexCer 35:2;3O|HexCer 16:1;2O/19:1;O	0.00164724	0.0821791	18	15	9072.18	0.511534	1	20	12	19867.2	0.00680752	0.362406	19	13.6167	13166.6	10497.2	0.797259	22541	13468	22114	8077	5575	4255	5958	5420	21738	23439	16175	18117	8387	9109	13935	10731	13064.9
225	NAGly 14:1	0.00164724	0.0821791	18	15	1783.32	0.835314	1	20	12	4500	0.0104416	0.398658	19	13.6167	2973.65	2280.75	0.766986	5604	4535	2485	2088	1613	1522	1275	1212	3307	5201	6430	3062	2086	1282	3698	1825	2951.56
359	PE P-36:2 or PE O-36:3	0.00164724	0.0821791	18	15	5019.75	0.274378	1	20	12	11073.2	0.00393297	0.302705	19	13.6167	7621.47	5179.55	0.6796	11721	8655	10807	3605	3070	2771	4589	3216	13014	11668	9183	10428	6252	5227	9074	7861	7571.31
722	unknown1186	0.00164724	0.0821791	24	21	1003.38	0.118796	1	25.2722	17.9999	4589.99	0.00186665	0.302705	24.6361	19.5517	3262.45	1120.87	0.343566	3863	3164	4245	1946	1940	2101	2437	2334	2469	3515	2863	2490	5745	3245	5070	4300	3232.94
874	unknown1322	0.00164724	0.0821791	18	15	21100.8	0.488181	1	20	12	54388.8	0.00653432	0.357794	19	13.6167	40874.6	23338.8	0.570985	61110	43645	63193	32219	22948	16076	28310	20042	49876	63165	50803	53711	31601	32794	47118	33767	40648.6
1164	unknown1584	0.00164724	0.0821791	18	15	18126.7	0.954333	1	20	12	39293.5	0.01172	0.398658	19	13.6167	24442.3	23705	0.969833	52406	38064	28653	19944	11089	9678	8812	6884	27148	46951	60326	22749	13309	9168	21734	10489	24212.8
1180	unknown1599	0.00164724	0.0821791	18	15	4410.58	0.814444	1	20	12	8368.25	0.0102147	0.398658	19	13.6167	6142.58	4803.64	0.782022	12619	7457	11994	4256	2526	1254	2675	1795	8067	10002	7956	7448	3695	5229	6739	3825	6096.06
1233	unknown1646	0.00164724	0.0821791	24	18	4879.04	0.121407	1	25.8651	17.9999	12861.7	0.00190333	0.302705	24.9326	18.0252	6911.95	4656.29	0.673658	10903	1799	3762	2915	776	1141	3920	1640	8709	4112	7234	10174	7961	12070	10704	20712	6783.25
1251	unknown1662	0.00164724	0.0821791	18	15	11298.9	0.700177	1	20	12	20631.5	0.00895593	0.398658	19	13.6167	12951.2	13238.4	1.02218	26069	13976	23873	10808	3016	1586	5105	1546	21118	25871	16576	18961	4224	7405	18578	6456	12823
1708	unknown514	0.00164724	0.0821791	18	15	4494.9	0.613914	1	20	12	9599.25	0.00798551	0.389727	19	13.6167	6418.6	4806.27	0.748802	10789	6271	10889	3650	2601	2368	3014	4099	10193	11020	7899	9285	4153	4222	6184	5316	6372.06
2041	unknown814	0.00164724	0.0821791	18	15	4559.07	0.304581	1	20	12	9387.25	0.0043135	0.302705	19	13.6167	6523.54	4657.18	0.713903	10029	6987	10551	3774	2672	1902	3493	2092	10958	10247	7313	9031	4119	5351	8270	6866	6478.44
2187	unknown946	0.00164724	0.0821791	18	15	2271.58	0.181515	1	20	12	5274.5	0.00272539	0.302705	19	13.6167	3855.65	2319.88	0.601681	4994	5649	5042	1924	1835	1113	2439	1522	5870	5654	4875	4699	4306	3063	4651	3695	3833.19
115	CL 72:7|CL 18:1_18:2_18:2_18:2	0.00267199	0.107118	18	15	285.318	0.349198	1	20	12	920.75	0.00744302	0.379763	19	13.6167	636.082	363.438	0.571369	977	603	716	354	392	322	519	326	920	1003	1017	743	533	339	762	595	632.562
237	NAPhe 14:1	0.00267199	0.107118	18	15	46336.4	0.997701	1	20	12	79217.8	0.018467	0.493552	19	13.6167	55378.2	48756.4	0.880426	124413	99998	87121	44454	26796	22093	21090	16108	59716	92953	111887	52315	29124	21295	43196	25938	54906.1
573	unknown1051	0.00267199	0.107118	18	15	1732.06	0.104138	1	20	12	5113.5	0.00255633	0.302705	19	13.6167	3870.95	1949.98	0.503749	5722	3781	3301	4040	1769	1909	2630	1962	5388	5511	5009	4546	3608	3588	5302	3567	3852.06
585	unknown1062	0.00267199	0.107118	24	15	682.004	0.101216	1	28	17.9999	2646.5	0.0024923	0.302705	26	16.4821	2071.01	65.1919	0.0314783	1828	1066	1345	483	1591	1793	2087	1751	2185	2398	3740	2261	3327	2335	2732	2192	2069.62
605	unknown1080	0.00267199	0.107118	18	15	4770.67	0.42425	1	20	12	10739.5	0.00882203	0.398658	19	13.6167	7264.45	5648.6	0.777567	10169	7858	13211	5289	2346	2120	3888	2685	12467	11558	8822	10111	3839	5871	9236	5886	7209.75
656	unknown1126	0.00267199	0.107118	18	15	7815.3	0.867696	1	20	12	16071.5	0.0163843	0.459785	19	13.6167	12506.6	8756.82	0.700175	26209	15907	14932	18605	5147	4960	6152	3985	15186	18080	18703	12317	9691	5936	13134	9805	12421.8
929	unknown1372	0.00267199	0.107118	18	15	6165.26	0.740418	1	20	12	14187.2	0.0142948	0.45195	19	13.6167	9873.21	7204.9	0.729742	16685	11178	16914	6911	3858	4034	6467	4081	12167	15581	14636	14365	6147	7271	10394	6166	9803.44
1016	unknown1450	0.00267199	0.107118	18	15	19475.1	0.265959	1	20	12	41621.2	0.00586233	0.34634	19	13.6167	29954.9	20383.3	0.680468	52051	30307	44454	20763	16272	8984	15067	6658	41243	45184	43415	36643	30052	21936	34682	28409	29757.5
1063	unknown1493	0.00267199	0.107118	18	15	17459.9	0.728027	1	20	12	40794	0.0140884	0.451836	19	13.6167	28981.2	20186.7	0.696544	49603	32903	47882	20808	11567	12465	19341	12105	36061	44697	41442	40976	18805	22300	31236	18381	28785.8
1201	unknown1617	0.00267199	0.107118	18	15	1591.34	0.24398	1	20	12	4448.25	0.00543409	0.329717	19	13.6167	3150.56	1955.1	0.620556	4932	3354	3015	3013	1115	1394	2569	1218	4848	4594	4078	4273	2348	2513	4295	2547	3131.62
2210	unknown967	0.00267199	0.107118	18	15	6783.98	0.393184	1	20	12	14392.5	0.00825593	0.394352	19	13.6167	9952.16	7309.19	0.734433	17573	11636	14796	5037	3179	3546	4757	3942	17693	14309	12510	13058	7381	8130	12545	8010	9881.38
43	Cer 35:2;3O|Cer 16:2;3O/19:0	0.00421867	0.13726	18	15	4739.03	0.719189	1	20	12	11703.5	0.0206249	0.511734	19	13.6167	8574.17	5432.45	0.633582	14085	9478	14690	5439	3580	3957	5756	4127	10112	12540	12103	12059	6410	6605	9195	6209	8521.56
63	Cer 37:2;3O|Cer 16:2;2O/21:0;(2OH)	0.00421867	0.13726	18	15	10944.2	0.857803	1	20	12	21915	0.0239622	0.511734	19	13.6167	15027.6	12421.4	0.826575	30163	18127	28283	8187	4712	4660	8490	4675	20145	23060	22054	22401	8779	9492	16420	8869	14907.3
89	Cer d33:1	0.00421867	0.13726	18	6	1028.66	0.878667	1	20	6	2729.25	0.024456	0.511734	19	6.01667	1792.16	1086	0.605969	946	691	946	625	2195	2396	3052	3274	769	941	915	872	2880	1343	2486	2238	1660.56
162	GlcCerd14:14E/20:02OH	0.00421867	0.13726	18	6	3421.34	0.902481	1	20	6	6852.25	0.025017	0.511734	19	6.01667	4305.84	2945.78	0.684135	2167	1383	1926	938	6083	6992	6778	7556	1770	1522	1557	1643	6882	2549	7452	5984	3948.88
187	LPC 20:1	0.00421867	0.13726	24	18	395.273	0.189211	1	23.3952	17.9999	1351	0.00649201	0.357794	23.6976	18.0029	981.924	307.095	0.312748	986	491	1515	584	437	373	995	562	1081	1129	1016	1188	1147	1171	1585	1501	985.062
312	PC O-38:2|PC O-20:1_18:1	0.00421867	0.13726	18	15	623.668	0.815805	1	20	12	1486	0.0229618	0.511734	19	13.6167	1129.96	692.481	0.612839	1663	1265	2169	878	571	334	779	556	1497	1752	1244	1451	676	922	1401	814	1123.25
607	unknown1082	0.00421867	0.13726	18	15	3520.33	0.349622	1	20	12	7287.5	0.0110903	0.398658	19	13.6167	5162.29	3740.38	0.72456	8898	6209	8125	2851	1761	1437	2709	1618	8367	7733	6370	6680	4338	4212	6564	4145	5126.06
923	unknown1367	0.00421867	0.13726	18	6	1310.45	0.296708	1	20	5.99999	5523	0.00961722	0.398658	19	6.01666	4445.66	1207.15	0.271535	3739	3333	3464	3483	5657	5525	5520	5390	3219	4115	3993	3546	4550	3955	4845	4456	4299.38
964	unknown1403	0.00421867	0.13726	18	15	18157.3	0.995	1	20	12	34768.5	0.027172	0.511734	19	13.6167	25275.6	19614	0.776004	56182	34579	45552	17975	13470	10576	12444	8092	30848	41208	43401	23617	15669	11776	21222	14760	25085.7
1227	unknown1640	0.00421867	0.13726	18	15	1687.16	0.735124	1	20	12	3823	0.0210139	0.511734	19	13.6167	2761.9	1771.02	0.641233	4609	2788	4697	1642	1371	932	1518	1697	4802	4378	2441	3671	2254	2309	2600	2207	2744.75
1812	unknown608	0.00421867	0.13726	18	6	1574.9	0.98238	1	20	6	4200.25	0.0268802	0.511734	19	6.01667	2761.93	1689.56	0.611733	1743	1367	1042	331	2888	3611	5226	5076	1293	1111	961	999	4703	1850	5261	3453	2557.19
1917	unknown702	0.00421867	0.13726	18	15	2999.55	0.368909	1	20	12	7979.25	0.0116185	0.398658	19	13.6167	5846.78	3178.66	0.54366	9123	5204	7628	3877	2751	3053	3650	3512	8540	7823	8762	6792	5575	3826	8413	4527	5816
2219	unknown975	0.00421867	0.13726	18	6	768.979	0.961237	1	20	6	3420.75	0.0263899	0.511734	19	6.01667	2665.96	875.966	0.328574	1912	1800	2313	1386	2496	3397	3442	4348	2057	1973	1765	1628	3691	2465	3059	3225	2559.81
16	Cer 26:2;2O|Cer 14:2;2O/12:0	0.0065055	0.155371	18	15	1059.07	0.986387	1	20	12	1992.75	0.0388148	0.542617	19	13.6167	1436.04	1243.02	0.865589	2912	1866	3462	1031	464	289	803	339	1607	2517	2159	1688	652	755	1567	673	1424
60	Cer 37:1;4O|Cer 22:0;3O/15:1;(2OH)	0.0065055	0.155371	18	15	4995	0.812981	1	20	12	11684.8	0.0330138	0.517839	19	13.6167	8286.43	5633.23	0.679814	14149	8954	13975	5748	3527	3826	5896	3860	10907	12241	11908	11683	5270	5813	8662	5291	8231.88
62	Cer 37:2;3O|Cer 15:2;2O/22:0;O	0.0065055	0.155371	18	15	6256.13	0.485418	1	20	12	13499.8	0.0213405	0.511734	19	13.6167	9458.86	6568.14	0.69439	16663	10266	14921	4141	2925	3109	5679	4553	15490	14005	12442	12062	7311	7283	11821	7653	9395.25
117	CL 72:9|CL 18:2_18:2_18:2_18:3	0.0065055	0.155371	18	15	133.643	0.711825	1	20	12	383.5	0.0295213	0.515656	19	13.6167	262.65	170.357	0.64861	467	324	289	130	88	161	224	118	355	462	431	286	198	123	271	249	261
311	PC O-36:1|PC O-18:0_18:1	0.0065055	0.155371	18	15	2679.76	0.699284	1	20	12	6151.25	0.0290821	0.515656	19	13.6167	4589.61	3012.77	0.656432	7086	4862	8968	3397	2056	1316	3093	1661	6099	6896	5260	6350	2838	3751	5714	3620	4560.44
358	PE P-36:1 or PE O-36:2	0.0065055	0.155371	18	15	15477.2	0.309736	1	20	12	36320	0.0145223	0.45195	19	13.6167	25868.1	16159.9	0.624705	37898	26621	39642	12997	11007	9314	16029	11710	46238	36689	29316	33037	22693	19274	34482	24438	25711.6
369	PE-Cer 35:2;3O|PE-Cer 17:0;2O/18:2;O	0.0065055	0.155371	18	15	2423.25	0.695405	1	20	12	6121.5	0.0289459	0.515656	19	13.6167	4741.62	2587.58	0.545715	7172	4669	8559	3350	2332	2277	3220	2350	5768	7106	5457	6155	3727	3939	5625	3759	4716.56
423	PI O-34:1|PI O-18:0_16:1	0.0065055	0.155371	18	15	4284.36	0.656749	1	20	12	8217.25	0.0275812	0.511734	19	13.6167	5732.24	4807.41	0.83866	9832	7026	10851	5012	1778	948	2991	1155	8075	9069	7978	7747	2529	4048	8544	3388	5685.69
534	unknown1016	0.0065055	0.155371	18	15	6662.01	0.281149	1	20	12	12852.5	0.0133591	0.441046	19	13.6167	9065.7	6435.41	0.709863	16667	8998	14047	4204	3631	3305	3407	2664	13785	13789	11430	12406	8614	6846	9914	10347	9003.38
554	unknown1034	0.0065055	0.155371	18	15	7134.88	0.861484	1	20	12	17594.2	0.0346586	0.526948	19	13.6167	14507.2	7744.29	0.533824	22423	16802	25470	16067	8778	9962	6364	6010	12986	19348	18196	19847	13098	7799	12825	14940	14432.2
669	unknown1138	0.0065055	0.155371	18	15	10778.1	0.598467	1	20	12	23143	0.0254954	0.511734	19	13.6167	16736.5	11834.5	0.707106	27141	17965	32414	8737	6149	3872	8027	6665	27336	28268	17042	19926	10661	12984	24511	14253	16621.9
814	unknown1269	0.0065055	0.155371	18	0	5310.73	0.501105	1	20	17.9999	17404.5	0.0219265	0.511734	19	18.05	14248.9	6000.46	0.421119	35139	16302	26953	10418	5847	6849	8365	7228	14475	12752	20834	14062	15916	14987	21980	16735	15552.6
834	unknown1287	0.0065055	0.155371	18	15	2104.7	0.212369	1	20	12	6056.25	0.0104785	0.398658	19	13.6167	4611.97	2087.4	0.452606	6100	4741	5976	2417	2385	2542	3778	2382	7067	6121	5526	5511	4218	3842	5861	5001	4591.75
853	unknown1303	0.0065055	0.155371	18	6	6406.03	0.82519	1	20	6	13087	0.0334295	0.517839	19	6.01667	6705.25	7334.1	1.09379	351	75	63	44	13409	9113	15714	14112	286	181	124	97	13145	11733	8975	5642	5816.5
902	unknown1348	0.0065055	0.155371	18	15	2136.7	0.608151	1	20	12	13710.8	0.0258444	0.511734	19	13.6167	11910.1	2569.66	0.215755	14585	10899	13192	11040	10170	9969	10826	9136	12099	15291	13583	13870	12371	9253	13144	10735	11885.2
1018	unknown1452	0.0065055	0.155371	18	6	535.633	0.998201	1	20	6	3028.25	0.0392024	0.542617	19	6.01667	2498.71	617.569	0.247155	2302	1800	1826	1629	3028	2304	3940	2841	1546	1946	1698	1822	2909	2198	4445	2548	2423.88
1165	unknown1585	0.0065055	0.155371	18	15	4805.85	0.982989	1	20	12	10061.5	0.0387032	0.542617	19	13.6167	6638.27	5771.35	0.869406	15384	9492	9439	3586	3542	3129	2669	1869	7333	12759	13508	6646	4565	2320	5837	3240	6582.38
1221	unknown1635	0.0065055	0.155371	18	6	8280.22	0.832467	1	20	6	17761.2	0.0336768	0.517839	19	6.01667	8882.9	10137	1.14118	0	12	23	0	14359	11710	26141	18835	0	42	50	0	19246	10252	14245	7557	7654.5
1280	unknown1689	0.0065055	0.155371	24	21	1489.17	0.150656	1	26.4865	17.9999	4594.98	0.00777004	0.387639	25.2432	19.6214	1656.05	2156.79	1.30237	4783	200	155	272	82	0	290	0	0	0	466	149	6206	2106	5051	5017	1548.56
1788	unknown587	0.0065055	0.155371	18	3	259.331	0.540902	1	27.8233	6.63e-05	3908.5	0.0233989	0.511734	22.9117	1.90933	4088.67	1067.62	0.261115	4253	4185	4269	2927	3780	4004	3944	3861	3482	3553	3946	3118	5680	4056	5924	4753	4108.44
1821	unknown616	0.0065055	0.155371	18	3	3733.17	0.169435	1	24.5682	6.63e-05	25520	0.00860906	0.398658	21.2841	1.77371	22241.3	9270.71	0.416824	34113	24050	28024	15893	18956	20741	18678	17963	12597	14853	23783	13485	32619	25948	32347	31777	22864.2
1828	unknown622	0.0065055	0.155371	18	6	2621.6	0.937737	1	20	6	6455.75	0.037209	0.542617	19	6.01667	3728.11	3173.32	0.851187	1085	859	521	551	5343	4160	9051	7269	947	718	900	432	7739	4444	5623	3855	3343.56
2108	unknown875	0.0065055	0.155371	24	18	1019.47	0.210992	1	24.5682	17.9999	4831.24	0.0104195	0.398658	24.2841	18.0024	3520.34	1215.2	0.345195	2943	2188	5550	2773	1360	1761	3724	2277	4024	3528	3142	3555	4533	4853	4116	5823	3509.38
2221	unknown977	0.0065055	0.155371	24	18	76813.5	0.1977	1	22.1053	17.9999	213465	0.0098468	0.398658	23.0526	18.0304	128779	75634.5	0.587318	134402	29853	225800	95003	13976	16775	66383	19109	261325	100146	96973	188370	113152	241856	182775	316078	131374
2228	unknown983	0.0065055	0.155371	18	15	28280.4	0.546607	1	20	12	59203.5	0.0236084	0.511734	19	13.6167	42213.7	30621.5	0.725391	79181	45712	71179	21855	16728	10691	20453	14802	64089	71354	50313	51058	30041	33761	56246	33212	41917.2
3	CAR 14:0	0.00980952	0.174781	18	15	23620.5	0.400912	1	20	12	58684.2	0.025714	0.511734	19	13.6167	43417.4	23253.3	0.535575	65397	19364	64507	44364	23885	19293	31158	22188	65459	57345	47432	64501	36563	37783	43149	48687	43192.2
34	Cer 34:1;3O|Cer 14:1;2O/20:0;(2OH)	0.00980952	0.174781	18	6	41180.1	0.964283	1	20	6	78370.2	0.0535461	0.601055	19	6.01667	46898.5	37244.4	0.794149	14844	7509	12479	5352	64341	78702	81281	89157	9795	11502	11052	9549	84899	34775	88303	74623	42385.2
44	Cer 35:2;3O|Cer 17:1;2O/18:1;(3OH)	0.00980952	0.174781	18	15	4187.13	0.784521	1	20	12	9347.25	0.0451518	0.561442	19	13.6167	6736.97	4508.56	0.669227	11990	7031	11567	4206	2581	3001	4509	3039	8159	10959	9257	9014	4746	5024	7532	4478	6693.31
116	CL 72:8|CL 18:2_18:2_18:2_18:2	0.00980952	0.174781	18	15	2153.14	0.685782	1	20	12	5935.5	0.0403739	0.546021	19	13.6167	3879.71	2777.49	0.715901	6845	5073	4143	2079	2340	1752	3052	1764	6171	6485	6534	4552	2583	1757	3578	2937	3852.81
137	FA 15:1	0.00980952	0.174781	18	15	6303.86	0.531982	1	20	12	13894	0.0326445	0.517839	19	13.6167	9676.99	6671.73	0.689443	19108	6094	15357	5142	4436	4134	4541	3305	12325	17636	13246	12369	9844	6706	11449	8106	9612.38
174	LPC 14:0	0.00980952	0.174781	24	18	22971.1	0.160122	1	25.8651	17.9999	77302.8	0.0117117	0.398658	24.9326	18.0252	46158.5	26090.7	0.565243	42496	17349	62607	31151	10125	11439	48306	12277	74594	28196	29022	50223	51847	88433	67470	101462	45437.3
185	LPC 18:3	0.00980952	0.174781	24	18	2564.85	0.158172	1	26.9725	18	8958.74	0.011588	0.398658	25.4862	18.0614	5518.13	2549.85	0.462086	3672	2092	7563	3585	1884	2332	5227	2504	8402	4112	3556	5829	5713	10076	8427	11619	5412.06
207	LPE O-22:0	0.00980952	0.174781	18	15	1216.93	0.957567	1	20	12	2722.75	0.0532389	0.601055	19	13.6167	2071.15	1415.63	0.6835	3409	2730	4044	1899	787	585	1767	682	2516	3154	2427	2794	1066	1644	2436	979	2057.44
317	PC P-36:1 or PC O-36:2 A	0.00980952	0.174781	18	15	60077.9	0.519664	1	20	12	120710	0.0320081	0.517839	19	13.6167	85325	64580.4	0.756875	148806	94791	157499	39170	28158	15193	38815	25442	149470	142235	80609	110527	56046	65629	127258	75545	84699.6
320	PC P-38:2 or PC O-38:3	0.00980952	0.174781	18	15	21826.3	0.641195	1	20	12	45405	0.0381718	0.542617	19	13.6167	31459.5	24474.4	0.777966	54968	32371	61738	13236	9821	5952	14771	10890	55869	55174	29847	40730	19507	22358	46616	25712	31222.5
531	unknown1013	0.00980952	0.174781	18	15	2194.15	0.870745	1	20	12	5008	0.0492236	0.581653	19	13.6167	3582.03	2416.95	0.674744	6614	4072	6097	1767	1502	1372	2296	2036	5662	5132	4756	4482	2485	2213	3951	2501	3558.62
550	unknown1030	0.00980952	0.174781	18	3	1875.95	0.194742	1	26.4865	6.63e-05	14038.5	0.0138699	0.451273	22.2432	1.85363	14067.9	8950.95	0.636266	19645	12186	17754	6569	9069	10811	10709	12971	7673	9706	12061	7178	28430	16196	26671	22538	14385.4
569	unknown1048	0.00980952	0.174781	18	15	12043.8	0.846058	1	20	12	28151	0.0480667	0.58016	19	13.6167	23696.5	12776.2	0.539157	39408	25132	44819	25987	13457	15300	9899	8900	20518	32485	27323	32278	21849	13152	21551	25107	23572.8
596	unknown1072	0.00980952	0.174781	24	18	1976.54	0.223256	1	22.1053	17.9999	6285.49	0.0156014	0.459212	23.0526	18.0304	3959.56	2177.81	0.550014	4746	1274	6566	3097	900	735	2359	925	6912	2663	3242	5987	3572	6641	5289	9640	4034.25
609	unknown1084	0.00980952	0.174781	18	15	7378.31	0.644795	1	20	12	14953.5	0.0383507	0.542617	19	13.6167	10735	7636.86	0.711401	20710	11444	18350	5411	3863	3728	5849	3693	17257	15310	14399	12848	7945	8352	13674	7743	10661
713	unknown1178	0.00980952	0.174781	18	3	1813.38	0.268772	1	25.4179	6.63e-05	14595.7	0.018293	0.493552	21.7089	1.80911	13235.2	6975.53	0.527045	23133	12254	14868	8128	10605	12744	9264	10012	8656	8243	12101	7134	25524	14125	19735	21051	13598.6
717	unknown1181	0.00980952	0.174781	24	18	2334.87	0.147626	1	23.7736	17.9999	7210.49	0.0109153	0.398658	23.8868	18.0004	4667.73	1955.47	0.418935	4676	2441	6656	1437	1669	1018	3800	1831	7932	4347	4219	5933	4385	7063	7890	9504	4675.06
859	unknown1309	0.00980952	0.174781	18	15	5628.22	0.146259	1	20	12	21189	0.0108276	0.398658	19	13.6167	13730.3	7929.46	0.577516	14696	8953	11693	10097	7584	9287	9080	6204	19091	23778	20576	21311	9816	8413	26736	11141	13653.5
931	unknown1374	0.00980952	0.174781	24	18	822.012	0.26623	1	26.1721	17.9999	3317.49	0.0181448	0.493552	25.0861	18.0338	1881.09	1223.99	0.650682	1030	587	3838	1058	496	431	1733	629	2147	983	1476	1799	2094	3953	2563	4660	1842.31
1097	unknown1523	0.00980952	0.174781	18	15	2672.69	0.739941	1	20	12	8127.25	0.0430107	0.554937	19	13.6167	6286.83	3247.9	0.51662	7442	5592	10958	6559	3638	3293	4821	2750	8204	8535	9382	6388	4000	3955	8589	5980	6255.38
1178	unknown1597	0.00980952	0.174781	18	15	6711.15	0.781681	1	20	12	15861	0.0450161	0.561442	19	13.6167	11710.9	7458.7	0.636902	22561	8719	12014	16716	5406	5582	6968	4560	15138	20979	15265	12062	9259	5657	15267	10066	11638.7
1244	unknown1656	0.00980952	0.174781	18	15	4413.05	0.591423	1	20	12	10249.8	0.0356775	0.526948	19	13.6167	6372.03	5237.2	0.821905	14006	3277	8633	2711	2393	2660	3485	2391	8403	13294	10331	8971	6513	3006	5983	5084	6321.31
1290	unknown1698	0.00980952	0.174781	18	15	5124.4	0.961841	1	20	12	11609	0.0534344	0.601055	19	13.6167	7307.24	6272.09	0.858338	16004	6654	10591	4361	3320	3368	5101	1975	7473	16632	15667	6664	3877	2082	8302	3873	7246.5
1299	unknown1705	0.00980952	0.174781	18	15	2015.96	0.999333	1	20	12	2313.25	0.0551425	0.609827	19	13.6167	1429.53	1971.11	1.37885	1320	2962	5813	1538	0	0	0	0	2888	2480	951	2934	0	655	1026	0	1410.44
1307	unknown1712	0.00980952	0.174781	24	18	2181.42	0.400598	1	24.1644	17.9999	5844.74	0.0256969	0.511734	24.0822	18.0002	3032.79	2478.04	0.81708	2247	230	5764	1807	0	75	826	99	6074	1321	1977	4620	1971	6225	3415	11768	3026.19
1738	unknown541	0.00980952	0.174781	18	15	8885.33	0.211584	1	20	12	22118.5	0.0148972	0.45195	19	13.6167	16693.8	9528.32	0.570771	26873	12918	19478	18233	5648	7000	9861	7303	26220	22737	20982	18535	15525	10300	24772	19239	16601.5
1855	unknown647	0.00980952	0.174781	24	18	43117.3	0.175915	1	22.5575	17.9999	137450	0.0127045	0.425695	23.2788	18.0173	89149.3	41925	0.470279	102328	34116	122322	69096	17738	21428	65719	33154	144462	66749	86261	130318	91214	126451	118283	213851	90218.1
1931	unknown715	0.00980952	0.174781	18	15	6021.72	0.586775	1	20	12	15368.5	0.0354425	0.526948	19	13.6167	11344.3	6547.18	0.577132	19758	10800	17053	5781	4236	4555	8820	6093	16330	17295	14459	13390	9496	9263	14317	8849	11280.9
1964	unknown745	0.00980952	0.174781	18	15	4609.63	0.329105	1	20	12	10175.2	0.0217455	0.511734	19	13.6167	7583.43	4594.19	0.605819	12553	9126	10670	4152	3499	2777	4060	3100	11596	11177	8354	9574	8542	5148	9720	6575	7538.94
1987	unknown766	0.00980952	0.174781	18	3	3534.83	0.255713	1	24.9858	6.63e-05	29100.2	0.0175291	0.485837	21.4929	1.79111	25960	11372.4	0.438074	41983	25700	31651	17067	21855	25658	18558	20360	18248	16581	26927	13891	44671	28401	36448	38200	26637.4
2081	unknown850	0.00980952	0.174781	18	15	5993.97	0.44855	1	20	12	13538.2	0.0282754	0.515656	19	13.6167	9976.14	6584.45	0.66002	16045	11012	16909	6081	3492	2516	5548	4125	16275	14605	11563	11710	6596	8625	15537	7959	9912.38
2145	unknown908	0.00980952	0.174781	18	15	2140.94	0.427915	1	20	12	5427.25	0.0271723	0.511734	19	13.6167	4071.99	2393.42	0.587776	6605	4531	6240	2279	1690	1744	2136	2145	6162	6061	4558	4928	3630	3443	5584	3045	4048.81
20	Cer 28:2;2O|Cer 16:2;2O/12:0	0.0144977	0.199677	18	15	1611.5	0.988291	1	20	12	3123.75	0.0751579	0.65697	19	13.6167	2350.18	1774.42	0.755014	4650	3401	5011	1541	875	688	1620	707	2882	3469	3375	2769	1350	1416	2504	1070	2333
90	Cer d34:0	0.0144977	0.199677	18	6	27916.8	0.98887	1	20	6	59368.5	0.0751936	0.65697	19	6.01667	38123.3	25735.6	0.675062	15693	8508	12935	6717	48656	51773	70715	66330	11905	13567	11419	12168	68275	36628	62543	62242	35004.6
175	LPC 14:1/0:0	0.0144977	0.199677	24	21	3536.59	0.232478	1	27.3065	17.9999	15486.7	0.0225572	0.511734	25.6533	19.6784	9797.11	3742.53	0.382004	7280	4835	12607	8917	4593	4095	13952	4240	10726	6052	5766	7861	12905	17924	15483	15635	9554.44
183	LPC 18:1	0.0144977	0.199677	24	18	288724	0.293018	1	22.2166	17.9999	831094	0.0274482	0.511734	23.1083	18.0268	508022	296404	0.583446	520784	108160	970156	356089	50819	56985	333723	74436	1012249	370313	352869	749595	417100	948546	695983	1262753	517535
184	LPC 18:2	0.0144977	0.199677	24	18	89091.6	0.453902	1	25.8651	17.9999	291667	0.0396388	0.542617	24.9326	18.0252	165206	113605	0.687656	81869	43019	397303	76304	35159	30261	161782	41783	250480	76662	85424	146343	173447	330303	238721	424202	162066
211	LPG 16:1	0.0144977	0.199677	24	18	614.122	0.154812	1	22.7907	17.9999	1849	0.0159338	0.459212	23.3953	18.012	1207.7	558.771	0.462672	1032	601	804	2011	305	475	1039	182	1995	1044	1029	1599	1275	2403	1822	1896	1219.5
364	PE-Cer 34:1;3O	0.0144977	0.199677	18	6	11173	0.969713	1	20	6	19911.5	0.0740119	0.65697	19	6.01667	12059.5	9312.75	0.772236	3545	1823	3892	1656	17641	18960	21670	21375	2688	2982	2340	2272	21251	9565	22707	20528	10930.9
392	PG 36:1|PG 18:0_18:1	0.0144977	0.199677	18	6	1473.96	0.986127	1	20	6	3489.5	0.0750247	0.65697	19	6.01667	2326.58	1381.39	0.593741	1591	868	1023	381	2934	3331	4124	3569	1225	1254	999	920	3036	1368	5007	2917	2159.19
432	TG 34:0|TG 10:0_12:0_12:0	0.0144977	0.199677	24	21	5863.86	0.157366	1	25.8651	17.9999	21122.4	0.0161593	0.459212	24.9326	19.5835	13901.4	5969.36	0.429409	15773	13404	20571	6602	7180	7562	12853	10089	5856	11908	13403	9101	22502	15484	24755	21749	13674.5
436	TG 38:1|TG 12:0_12:0_14:1	0.0144977	0.199677	18	3	68134.3	0.263576	1	25.4179	6.63e-05	584621	0.0250948	0.511734	21.7089	1.80911	531047	257984	0.485803	891542	486829	615174	344944	434099	501323	371294	398435	362558	338624	536151	274056	999517	567662	759186	830389	544486
620	unknown1094	0.0144977	0.199677	24	21	918.178	0.373316	1	20	17.9999	3313.5	0.0336592	0.517839	22	19.525	2754.03	1032.5	0.374905	5802	2586	4838	2211	1334	1456	1916	1393	2502	2641	3303	2354	3074	2727	3896	3557	2849.38
634	unknown1106	0.0144977	0.199677	18	15	2520.84	0.674338	1	20	12	5357.75	0.0550193	0.609827	19	13.6167	4163.48	2417.79	0.580713	7582	4431	7363	1962	1942	1875	2324	1600	5918	5860	4743	4910	3106	3352	5176	4097	4140.06
644	unknown1115	0.0144977	0.199677	18	6	1791.46	0.963506	1	20	6	3759.5	0.0736279	0.65697	19	6.01667	2322.8	1707.09	0.734928	900	490	733	395	2962	3784	4084	4208	674	869	759	666	3901	1783	4182	3465	2115.94
651	unknown1121	0.0144977	0.199677	18	15	4826.53	0.651969	1	20	12	9490.5	0.0535131	0.601055	19	13.6167	7369.84	4656.35	0.631811	13595	8600	13741	3719	2910	2362	3574	3020	10496	10401	8069	8996	5283	6311	10002	6117	7324.75
688	unknown1155	0.0144977	0.199677	18	3	8195.01	0.304178	1	25.2722	6.63e-05	62091.9	0.0283287	0.515656	21.6361	1.80304	55395.9	28672.4	0.517591	98112	52417	64604	33235	46129	50494	39309	41746	35080	33680	55898	27179	108693	58260	79694	86836	56960.4
696	unknown1162	0.0144977	0.199677	24	21	2163.39	0.45227	1	20	17.9999	8486.49	0.0395199	0.542617	22	19.525	7079.03	2495.83	0.352567	16494	6841	8916	6387	3742	3821	3486	3830	7923	6322	9474	5770	9567	6708	10167	7504	7309.5
753	unknown1213	0.0144977	0.199677	18	15	1244.86	0.316471	1	20	12	3488.25	0.0292918	0.515656	19	13.6167	2787.04	1275.13	0.457522	3786	3198	4035	1934	1601	1155	2145	1484	3903	3719	2962	3369	2773	3162	3107	2062	2774.69
790	unknown1247	0.0144977	0.199677	24	18	2320.02	0.428318	1	22.4427	17.9999	6939.74	0.0377648	0.542617	23.2214	18.0202	3995.81	2543.66	0.63658	4495	617	6673	2459	133	326	1558	557	7733	2539	3044	7167	2846	6759	3991	14163	4066.25
806	unknown1261	0.0144977	0.199677	18	15	1211.27	0.750341	1	20	12	2058.25	0.0600586	0.621344	19	13.6167	1419.87	1251.92	0.881714	3233	1140	3180	476	261	106	411	398	2290	2756	1472	1715	1052	778	1690	1566	1407.75
843	unknown1295	0.0144977	0.199677	18	6	60282.6	0.976517	1	20	6	116556	0.0744323	0.65697	19	6.01667	72424.9	52723.6	0.727976	27669	13922	22771	11197	97274	114551	124903	129498	20084	22039	21011	19362	122287	58990	136364	114652	66035.9
895	unknown1341	0.0144977	0.199677	18	15	2190.97	0.291777	1	20	12	5053.75	0.0273499	0.511734	19	13.6167	3749.17	2308.59	0.615759	5395	4367	5602	2603	1566	1102	2322	1387	6151	4914	4464	4686	2708	3141	5974	3247	3726.81
917	unknown1361	0.0144977	0.199677	18	6	3115.16	0.974502	1	20	6	7942.5	0.0743078	0.65697	19	6.01667	4395.08	4158.69	0.946216	659	352	417	192	8368	4670	12558	6174	471	529	447	356	8099	10544	4502	3920	3891.12
1006	unknown1441	0.0144977	0.199677	24	21	1281.98	0.232371	1	24.4321	17.9999	6753.24	0.0225483	0.511734	24.2161	19.5149	5006	1614.21	0.322455	8275	4531	5300	3048	2884	3512	3673	3351	4972	4964	4286	4051	6376	4676	7708	8253	4991.25
1055	unknown1486	0.0144977	0.199677	24	18	14527.9	0.142028	1	20.5594	17.9999	48468.7	0.0147955	0.45195	22.2797	18.1079	34334.4	14291.4	0.416243	40390	12931	51604	42353	9028	10518	29698	8584	50304	36175	31429	47872	31989	58982	52297	50607	35297.6
1247	unknown1659	0.0144977	0.199677	18	15	12421.4	0.451521	1	20	12	30081.2	0.0394654	0.542617	19	13.6167	21607.5	12737.1	0.589477	45648	11280	12043	22454	9023	9743	10929	8653	28334	37126	25408	29457	21180	15922	36023	20523	21484.1
1356	unknown198	0.0144977	0.199677	18	6	735.391	0.999976	1	28	6	3128.5	0.0758762	0.65697	23	6.29762	2389.59	376.431	0.157529	1643	1438	1505	768	1950	2746	4062	3756	1630	1233	1275	1321	4088	1757	5308	3546	2376.62
1451	unknown283	0.0144977	0.199677	18	15	576.822	0.900565	1	20	12	4088.5	0.0697002	0.65697	19	13.6167	3619.56	677.16	0.187084	4759	3899	4125	2139	2587	2843	3289	3596	4319	3918	3902	4215	3765	3376	3444	3632	3613
1724	unknown529	0.0144977	0.199677	24	18	9737.92	0.282303	1	26.3284	17.9999	36052.9	0.0265969	0.511734	25.1642	18.0386	20017.1	13340.7	0.666464	9431	5434	39201	13114	4475	4348	19801	5110	26729	10078	12968	18183	21732	37771	29978	54731	19567.8
1739	unknown542	0.0144977	0.199677	18	15	954.241	0.194922	1	20	12	7254	0.0194111	0.511734	19	13.6167	5801.8	1360.04	0.234416	6071	6388	5486	3373	4717	5243	5124	5644	7273	7348	7807	6588	5907	4478	5746	5425	5788.62
1744	unknown547	0.0144977	0.199677	24	18	3301.84	0.103313	1	28	17.9999	13358	0.0112391	0.398658	26	18.1071	9237.33	1920.26	0.207881	8915	3809	8281	4954	5501	5102	9939	6334	11796	9224	9670	9207	12173	9577	14690	16992	9135.25
1903	unknown690	0.0144977	0.199677	18	15	2738.27	0.911288	1	20	12	5260.25	0.0703737	0.65697	19	13.6167	3949	2826.82	0.715831	6683	6990	7041	2374	1691	1299	2256	1398	4547	5992	5286	5216	2560	2576	4218	2619	3921.62
1943	unknown726	0.0144977	0.199677	24	18	1102.03	0.28437	1	27.3065	17.9999	3730.74	0.0267616	0.511734	25.6533	18.075	2095.49	1218.3	0.581393	1190	665	3926	927	612	427	2798	666	2483	1089	1225	1710	3071	3864	3122	4866	2040.06
2035	unknown809	0.0144977	0.199677	24	18	4508.87	0.372914	1	27.8233	17.9999	15913.2	0.0336288	0.517839	25.9117	18.0985	8725.24	4835.62	0.554211	3322	2920	17040	2477	1937	1793	12743	3094	10786	3866	4466	7541	11531	18502	14657	18963	8477.38
2068	unknown839	0.0144977	0.199677	24	18	3602.89	0.244363	1	27.6489	17.9999	14611.5	0.0235337	0.511734	25.8245	18.0903	9576.01	3471.87	0.362559	13233	4729	8077	3889	7170	8039	3141	6508	12205	8366	6764	9908	20118	8931	15148	14249	9404.69
2188	unknown947	0.0144977	0.199677	18	15	1621.4	0.202568	1	20	12	4643	0.0200595	0.511734	19	13.6167	3613.19	1684.87	0.46631	4613	4463	4658	2074	1777	1420	2563	2231	5536	5178	3999	3859	3223	4340	4391	3225	3596.88
2203	unknown960	0.0144977	0.199677	18	15	3613.85	0.510606	1	20	12	8743.25	0.0437193	0.557669	19	13.6167	6449.16	3766.62	0.584047	9798	7578	9821	3729	3730	2643	3834	3516	8966	9578	8712	7717	4467	5672	7746	5096	6412.69
2244	unknown998	0.0144977	0.199677	18	3	1048.29	0.289315	1	25.5652	6.63e-05	11522.7	0.0271546	0.511734	21.7826	1.81525	10617.8	5254.48	0.494873	18236	9000	12021	6834	8276	10471	6048	7966	7590	6637	11564	4755	21202	12165	15181	16113	10878.7
114	CL 72:10|CL 36:4_36:6	0.0210199	0.239541	18	15	726.552	0.809922	1	20	12	3060.5	0.0863668	0.671246	19	13.6167	2471.77	873.455	0.353372	3402	3088	2627	1803	1801	1590	2349	1733	3065	2995	3540	2642	1998	1713	2792	2275	2463.31
189	LPC 20:5	0.0210199	0.239541	24	21	236.881	0.177632	1	24.2975	17.9999	804.748	0.024607	0.511734	24.1488	19.5099	493.903	242.099	0.490175	477	221	540	682	197	138	337	102	805	398	115	647	494	903	729	1093	492.375
214	LPI 18:0	0.0210199	0.239541	18	6	1686.1	0.996553	1	20	6	4319.25	0.101925	0.704773	19	6.01667	2952.49	1639.51	0.555298	2104	887	358	1731	3266	4657	5368	3986	1339	1596	1251	1177	4367	1704	6392	3878	2753.81
281	PC 35:2 Isomer A	0.0210199	0.239541	24	18	3394.11	0.478637	1	25.5652	17.9999	23309.7	0.0563319	0.616903	24.7826	18.0179	19782	2088.68	0.105585	23919	17989	19129	9274	16727	15683	16786	17485	24316	23056	19573	18548	22780	20635	29039	20785	19732.8
433	TG 35:0|TG 11:0_12:0_12:0	0.0210199	0.239541	24	21	1428	0.379648	1	20.464	18	4515.99	0.0465306	0.564656	22.232	19.504	3515.29	1381.09	0.392881	7002	3573	6083	2186	1712	1898	2784	2005	2085	2897	4230	3520	4209	3999	5803	4053	3627.44
493	TG 56:5 Isomer C	0.0210199	0.239541	24	18	1670.36	0.238822	1	24.4321	17.9999	6192.25	0.0315975	0.517839	24.2161	18.0014	4707.88	995.775	0.211512	6186	2965	4763	1957	2963	3369	3185	3599	6333	5784	4304	5039	7486	3942	6533	6808	4701
508	TG 60:6	0.0210199	0.239541	24	18	971.918	0.367612	1	22.7907	17.9999	3278.5	0.0453045	0.561442	23.3953	18.012	2609.57	408.323	0.156472	3394	1927	2796	780	1907	1614	2108	1790	3560	3152	2375	3374	3979	1955	3738	3442	2618.19
567	unknown1046	0.0210199	0.239541	18	15	3740.24	0.685286	1	20	12	7097.75	0.0754832	0.65697	19	13.6167	4924.81	3885.06	0.788874	8872	5125	10038	1690	1851	931	1818	1568	8955	8361	4468	6607	3197	3487	7420	3807	4887.19
619	unknown1093	0.0210199	0.239541	24	18	1127.13	0.255716	1	24.2975	17.9999	5174.75	0.0334653	0.517839	24.1488	18.0007	4058.27	722.372	0.178	4522	2012	4068	3258	2103	3298	2989	3500	6076	5258	3512	3582	5760	3721	5824	5394	4054.81
648	unknown1119	0.0210199	0.239541	18	15	2763.2	0.682607	1	20	12	6600.5	0.0752443	0.65697	19	13.6167	4996.02	3022.15	0.604912	8794	5820	7798	3134	2852	1735	3000	2033	7579	7724	5432	5667	3772	3707	6525	3896	4966.75
659	unknown1129	0.0210199	0.239541	18	3	27431.5	0.274751	1	25.4179	6.63e-05	236187	0.0355417	0.526948	21.7089	1.80911	213578	105646	0.494646	367788	191228	254044	131690	171157	197459	150225	158596	140184	133212	210923	120090	410428	226016	305067	337194	219081
680	unknown1148	0.0210199	0.239541	18	3	203.647	0.637374	1	26.0177	5.29e-05	2394.75	0.0711768	0.65697	22.0088	1.83409	2358.19	629.009	0.266734	2266	3025	2789	1499	2252	2456	2376	1772	2049	2002	2218	1640	3417	2643	2574	3180	2384.88
695	unknown1161	0.0210199	0.239541	18	15	2498.56	0.448746	1	20	12	5958	0.0534222	0.601055	19	13.6167	4569.26	2479.18	0.542579	8057	4199	6624	2665	1835	1830	2999	2325	6371	6893	5767	4801	4146	3504	6407	4301	4545.25
734	unknown1197	0.0210199	0.239541	18	6	6007.93	0.899843	1	20	6	12898.5	0.0939643	0.680483	19	6.01667	6757.7	7122.27	1.05395	406	89	95	37	12513	8564	16269	14248	223	185	132	117	14725	10943	10018	5750	5894.62
841	unknown1293	0.0210199	0.239541	18	15	7873.28	0.199835	1	20	12	25086.5	0.027188	0.511734	19	13.6167	19104.2	8065.31	0.422174	27474	13319	23589	11394	12732	14301	11456	9216	24013	29026	22439	24868	23290	14910	22155	20236	19026.1
919	unknown1363	0.0210199	0.239541	24	0	1641.55	0.181265	1	24.0327	6.63e-05	2691.49	0.0250331	0.511734	24.0163	3.31e-05	1634.81	2094.04	1.28091	4898	1047	4500	321	691	447	238	338	774	313	223	206	1898	2580	3387	4278	1633.69
950	unknown1391	0.0210199	0.239541	18	6	1296.66	0.998553	1	20	6	3639	0.102087	0.704773	19	6.01667	2646.58	1223.02	0.462114	1765	1087	1668	665	3009	3172	4369	4006	1322	1510	1345	1363	4323	1989	4254	4127	2498.38
952	unknown1393	0.0210199	0.239541	24	18	1178.92	0.605424	1	26.0177	17.9999	4857.98	0.0682633	0.65697	25.0088	18.0293	2625.57	1997.53	0.7608	1801	416	6901	921	306	283	3003	892	2820	1058	1026	2202	3215	4182	3378	8657	2566.31
1013	unknown1448	0.0210199	0.239541	18	15	6171.63	0.926758	1	20	12	11455	0.0962007	0.683451	19	13.6167	9638.79	6057.43	0.628443	19965	9777	22814	6782	4208	4761	3482	2562	8364	13426	10520	13510	8135	4725	10712	9539	9580.12
1049	unknown1480	0.0210199	0.239541	24	0	4251.83	0.108435	1	24.0327	6.63e-05	8560.72	0.0161463	0.459212	24.0163	3.31e-05	6246.73	5002.36	0.800797	12352	6604	12574	2713	2669	3644	4657	3728	2494	2134	4145	3628	9341	8358	9688	11176	6244.06
1053	unknown1484	0.0210199	0.239541	18	6	883.53	0.999986	1	20	6	4366.25	0.102204	0.704773	19	6.01667	3826.98	691.971	0.180814	3627	2711	3774	1839	4005	4361	4986	4113	3060	3604	2615	3049	4793	3651	4779	4923	3743.12
1189	unknown1606	0.0210199	0.239541	24	18	2501.74	0.171439	1	21.7778	17.9999	7221.99	0.023877	0.511734	22.8889	18.0425	4547.72	2464.31	0.541878	4762	999	7810	4256	473	649	3252	709	7514	3673	3849	7543	4007	8658	6801	9422	4648.56
1305	unknown1710	0.0210199	0.239541	18	15	57734	0.27333	1	20	12	105863	0.0353878	0.526948	19	13.6167	73381.3	53255.9	0.725743	130151	27842	51402	131110	17265	24905	23616	27647	106231	120814	89431	106977	80060	60668	99826	67903	72865.5
1479	unknown308	0.0210199	0.239541	24	18	21251.4	0.249401	1	24.7059	17.9999	73960.2	0.03277	0.517839	24.3529	18.0038	51824.3	18114.4	0.349535	80510	32695	57291	11356	29663	32136	33170	28920	62981	63574	51080	46749	83751	46399	82607	83084	51622.9
1777	unknown577	0.0210199	0.239541	24	18	2067.93	0.250296	1	24.8451	17.9999	9404.74	0.0328687	0.517839	24.4225	18.0054	7280.72	1690.49	0.232187	10951	4966	6397	4072	4666	5812	5448	5290	8033	7982	6970	7928	9308	7457	11148	9706	7258.38
1805	unknown601	0.0210199	0.239541	24	18	12142.4	0.231391	1	23.3952	17.9999	38245.5	0.0307682	0.517839	23.6976	18.0029	28357.7	7132.65	0.251524	40093	17010	29537	10635	16964	19227	18848	16562	37916	36389	25239	33488	46562	22902	41347	42171	28430.6
1815	unknown610	0.0210199	0.239541	24	18	473.762	0.303899	1	26.1721	17.9999	3550.25	0.0386683	0.542617	25.0861	18.0338	3072.32	274.465	0.0893347	3600	2677	3032	1725	2336	2754	2775	2803	3193	3419	3071	3432	3562	3134	3582	3923	3063.62
1818	unknown613	0.0210199	0.239541	18	15	4657.18	0.363069	1	20	12	13135.2	0.0448395	0.561442	19	13.6167	10458.1	4616.12	0.441393	15533	10969	14804	5778	5771	4725	7254	6731	13793	14578	11791	12379	9647	8527	13463	10871	10413.4
1897	unknown685	0.0210199	0.239541	18	15	3457.05	0.430859	1	20	12	8874.25	0.0516612	0.597832	19	13.6167	6717.31	3529.77	0.525474	10572	6859	9794	3519	3102	2668	5101	3666	9768	9183	8616	7930	5491	5750	9001	5910	6683.12
1909	unknown696	0.0210199	0.239541	18	15	2442.7	0.856142	1	20	12	5059.25	0.0902968	0.671246	19	13.6167	3955.9	2455.02	0.620598	7257	5035	7560	1962	1646	1406	2231	1837	6062	5357	4589	4229	3523	2482	4712	3026	3932.12
1923	unknown708	0.0210199	0.239541	24	18	675.464	0.337594	1	25.8651	17.9999	2928.5	0.0422095	0.554937	24.9326	18.0252	2173.98	553.255	0.25449	2802	1905	1840	870	1340	1459	1830	1483	2558	2527	2205	2006	3433	1460	3764	3057	2158.69
1952	unknown734	0.0210199	0.239541	24	18	3839.77	0.223304	1	23.7736	17.9999	13310.7	0.0298598	0.515656	23.8868	18.0004	8722.36	4138.23	0.474439	9310	3710	13741	5631	2378	2482	7073	4354	13090	6208	7489	11097	9460	11789	12218	19776	8737.88
2034	unknown808	0.0210199	0.239541	24	21	1035.91	0.158219	1	26.1721	17.9999	4029.99	0.0223026	0.511734	25.0861	19.6016	2682.22	1050.06	0.391487	3100	2678	3627	1133	1568	1606	2395	2152	1506	2170	2463	1660	3964	3067	4426	4663	2636.12
2123	unknown889	0.0210199	0.239541	24	18	4239.28	0.138738	1	21.5648	17.9999	12204.5	0.0199397	0.511734	22.7824	18.0515	8141.53	3676.88	0.45162	9907	3853	12391	5548	2077	2217	4774	3091	13036	6634	8617	11969	8606	11647	10430	18135	8308.25
22	Cer 30:2;2O|Cer 16:2;2O/14:0	0.0299489	0.256624	18	15	883.883	0.87811	1	20	12	2869.5	0.121979	0.756183	19	13.6167	2262.43	1012.86	0.447684	3210	2473	3491	1471	1204	1183	2345	1225	2456	3255	2853	2914	1841	1491	2743	1887	2252.62
40	Cer 35:0;2O|Cer 14:0;2O/21:0	0.0299489	0.256624	18	6	653.72	0.999864	1	20	6	1886	0.135003	0.756183	19	6.01667	1426.33	583.472	0.409072	990	506	1092	336	1520	1675	2291	2058	844	881	639	745	2519	1160	2240	2194	1355.62
77	Cer 40:2;3O	0.0299489	0.256624	18	15	2524.72	0.926029	1	20	12	6085.25	0.127162	0.756183	19	13.6167	4478.6	2701.78	0.603263	8451	3981	7852	2137	2098	2109	3351	2273	5993	6861	5813	5674	3315	2758	5527	3046	4452.44
82	Cer 44:0;3O|Cer 18:0;3O/26:0	0.0299489	0.256624	18	15	47791.9	0.190051	1	20	12	150945	0.0351112	0.526948	19	13.6167	113506	51770.2	0.456099	177077	90643	133944	44707	78333	75482	55825	46319	145748	182943	143243	131845	137711	107774	127559	128929	113005
135	FA 14:1 (physeteric acid)	0.0299489	0.256624	18	15	294456	0.436098	1	20	12	1.1577e+06	0.0697199	0.65697	19	13.6167	960399	318718	0.33186	1378217	803372	1151922	836509	734496	677530	747222	569248	1036561	1299590	1243057	1051598	1082385	732304	1078851	894142	957313
173	LPC 12:0/0:0	0.0299489	0.256624	24	21	9371.82	0.230268	1	26.0177	17.9999	34456.7	0.0412175	0.550794	25.0088	19.5924	21454.6	10016.6	0.466872	19026	10876	27687	24098	8037	7198	27875	7160	26074	12386	11939	16529	23595	47161	31650	35421	21044.5
188	LPC 20:2	0.0299489	0.256624	24	18	1233.55	0.548019	1	22.3291	17.9999	3645.75	0.0838635	0.671246	23.1646	18.0234	2439.53	1111.48	0.455611	2137	972	5561	838	701	664	2143	695	4171	2141	1893	3065	2446	3109	3605	5423	2472.75
191	LPC P-16:0 or LPC O-16:1	0.0299489	0.256624	24	18	1830.52	0.320991	1	22.6735	17.9999	6891.24	0.0542635	0.606077	23.3368	18.0145	4572.47	2023.73	0.442591	5456	1593	6132	3756	1541	1679	3048	1636	7798	2910	3970	6830	4154	6397	5562	11452	4619.62
192	LPE 12:0	0.0299489	0.256624	24	21	879.994	0.357358	1	28	6.63e-05	1563.5	0.0592627	0.621344	26	24.375	1931.99	946.031	0.489667	1654	608	2555	1437	886	761	3014	953	1635	1010	1228	1368	2689	3403	2749	3815	1860.31
235	NAPhe 12:0	0.0299489	0.256624	18	15	49044.2	0.961155	1	20	12	214683	0.130913	0.756183	19	13.6167	180218	58558.7	0.324932	314097	151149	183354	147752	129824	126905	132074	127348	184218	252702	246023	175789	162201	109374	288446	143160	179651
305	PC 40:5 Isomer B	0.0299489	0.256624	18	0	549.776	0.630978	1	20	12	2076	0.093895	0.680483	19	15.2	1782.74	815.294	0.457327	2937	2217	3031	1262	1077	1043	1207	996	1974	2733	1660	1937	2295	1097	2061	2319	1865.38
373	PE-Cer 36:1;2O|PE-Cer 18:0;2O/18:1	0.0299489	0.256624	18	6	18211.5	0.994653	1	20	6	38124	0.134455	0.756183	19	6.01667	25245.9	15678.7	0.62104	11690	6511	10898	4714	31317	37489	43156	40534	9290	10863	8874	7922	43407	19264	48992	38614	23345.9
427	PS 36:2|PS 18:1_18:1	0.0299489	0.256624	18	15	14610.9	0.983431	1	20	12	41240	0.133273	0.756183	19	13.6167	30226.2	18013.5	0.595956	60027	43335	27401	22649	19496	19051	14646	19717	33635	47797	49274	34254	26588	11439	35911	15608	30051.8
537	unknown1019	0.0299489	0.256624	18	15	28761.6	0.460057	1	20	12	63800.5	0.0728134	0.65697	19	13.6167	49944.3	28548	0.571596	88068	52942	84318	24340	20033	15211	29917	20591	71198	67567	60987	55450	44142	43250	72562	44110	49667.9
577	unknown1055	0.0299489	0.256624	24	18	6520.76	0.298094	1	22.4427	18	32323	0.0510535	0.59386	23.2214	18.0202	27308.7	3233.24	0.118396	34548	18593	28230	17372	23224	25590	19879	16884	31233	34651	28258	30618	38144	24451	34788	31909	27398.2
599	unknown1075	0.0299489	0.256624	18	15	521.845	0.980962	1	20	12	5017	0.133012	0.756183	19	13.6167	4413.49	870.425	0.197219	4335	5458	4971	4320	4038	4532	3617	3698	4926	4963	5290	4889	3972	3627	4212	3633	4405.06
616	unknown1090	0.0299489	0.256624	24	18	779.585	0.164171	1	20.1831	17.9999	2949.5	0.0310498	0.517839	22.0915	18.1353	2216.26	784.541	0.353993	3362	1491	3221	1717	1037	1023	1468	1110	3324	2085	2213	2567	2208	2893	2822	3875	2276
624	unknown1098	0.0299489	0.256624	24	18	3778.78	0.549487	1	26.8085	17.9999	13810.9	0.0840441	0.671246	25.4043	18.0551	6368.79	5747.27	0.902412	977	451	18326	1662	141	156	8548	877	6271	721	1823	3059	6708	20030	8898	19608	6141
650	unknown1120	0.0299489	0.256624	18	15	4386.54	0.901214	1	20	12	11576.8	0.124487	0.756183	19	13.6167	10302	4411.94	0.428259	16680	12171	17989	10328	6374	7320	6293	4553	8649	12537	11304	13817	9728	6009	9593	10804	10259.3
658	unknown1128	0.0299489	0.256624	18	6	1769.53	0.996176	1	20	6	3752.75	0.134616	0.756183	19	6.01667	2548.34	1471.73	0.577526	1540	712	1139	468	3229	3624	4286	3872	1067	1136	1101	1047	4193	1723	4579	4204	2370
715	unknown118	0.0299489	0.256624	18	3	336.583	0.646508	1	27.1385	6.63e-05	10807.7	0.0957352	0.682303	22.5692	1.8808	10976.2	1348.78	0.122882	11674	12125	11584	7848	9926	10978	10840	9995	9764	10601	10502	10344	13077	10943	13314	12680	11012.2
736	unknown1199	0.0299489	0.256624	24	18	4231.68	0.406491	1	21.4599	17.9999	12076	0.0658423	0.65697	22.7299	18.0563	9067.28	2554.45	0.281722	14956	5809	10944	2685	4488	5665	5517	5012	11687	13128	7866	10959	14333	6196	14634	13141	9188.75
768	unknown1227	0.0299489	0.256624	18	15	532.805	0.25147	1	20	12	1657.75	0.0443493	0.561442	19	13.6167	1164.67	585.284	0.502533	1602	1322	982	565	514	688	1043	756	1780	1591	1697	1563	1178	609	1576	1078	1159
780	unknown1238	0.0299489	0.256624	24	21	900.5	0.15146	1	26.0177	17.9999	4107.24	0.0290114	0.515656	25.0088	19.5924	2960.09	919.471	0.310623	3477	2633	3698	1928	1752	1570	2807	2785	1745	2648	3033	2254	4154	3369	4459	4447	2922.44
799	unknown1255	0.0299489	0.256624	24	18	7263.05	0.288637	1	21.253	17.9999	22111.2	0.0497124	0.584316	22.6265	18.0665	15818.4	5810.98	0.367356	26729	11282	18983	6061	9218	1342	11283	8739	21554	22089	14671	17530	23256	11399	27467	26323	16120.4
811	unknown1266	0.0299489	0.256624	24	18	800.091	0.54909	1	26.6465	17.9999	2494.99	0.0839953	0.671246	25.3233	18.0493	1212.08	1019.3	0.840958	384	49	2802	235	0	0	1033	126	2309	275	434	1152	976	2698	1495	4811	1173.69
822	unknown1276	0.0299489	0.256624	18	15	3220.87	0.956066	1	20	12	10007.5	0.130372	0.756183	19	13.6167	9123.62	3426.73	0.375589	12479	10313	16889	10112	6293	7885	4793	4568	6962	10759	9858	12451	8600	6013	7894	9578	9090.44
825	unknown1279	0.0299489	0.256624	18	15	7744.59	0.936615	1	20	12	24863.5	0.128296	0.756183	19	13.6167	22978.1	7994.74	0.347929	30968	25908	41267	25598	16146	20070	12925	11712	17786	27153	24502	30013	22233	15607	20266	24257	22900.7
877	unknown1325	0.0299489	0.256624	18	6	1673.01	0.995768	1	20	6	4560.5	0.134573	0.756183	19	6.01667	3354.41	1468.64	0.437825	2373	1671	2191	949	4438	3961	5126	4717	2127	1947	1463	2264	5144	2536	5438	4478	3176.44
897	unknown1343	0.0299489	0.256624	18	15	9837.27	0.832125	1	20	12	22512.5	0.116931	0.746653	19	13.6167	15279.4	10652.8	0.697199	40898	11558	2186	13898	5432	8135	6608	5983	18720	26442	22832	22056	11015	10722	23605	12730	15176.2
899	unknown1345	0.0299489	0.256624	18	15	1298.96	0.578719	1	20	12	4269.75	0.0876168	0.671246	19	13.6167	3419.91	1410.45	0.412423	4580	3385	5248	2269	2238	1657	2736	2297	4111	4800	3995	4173	3192	2664	4198	2957	3406.25
909	unknown1354	0.0299489	0.256624	18	15	6193.73	0.858457	1	20	12	17315.2	0.119831	0.751452	19	13.6167	15561.2	6295.49	0.404565	23037	18199	25873	18147	10939	12009	8167	6974	13159	19093	16891	20118	15131	8766	14487	17013	15500.2
948	unknown139	0.0299489	0.256624	24	18	28640.3	0.282227	1	23.52	17.9999	88139.2	0.0487982	0.581653	23.76	18.0018	62507.2	20005.5	0.320051	97137	34592	65600	20409	32485	39091	38386	33655	84932	82015	53033	68803	110829	46629	95815	99284	62668.4
954	unknown1395	0.0299489	0.256624	18	0	4976.62	0.899807	1	20	12	12915.5	0.124335	0.756183	19	15.2	11893.2	6073.98	0.510712	19003	14717	26137	13857	7651	10148	5708	5920	8207	14709	11989	16757	14226	7414	10738	12960	12508.8
1073	unknown1501	0.0299489	0.256624	24	18	3341.79	0.235127	1	27.1385	17.9999	12371.2	0.0419403	0.554937	25.5692	18.068	8310.06	2801.3	0.337097	11095	4474	7509	2528	4218	5111	5919	5738	9752	10443	6531	8206	14331	5979	15842	13333	8188.06
1079	unknown1507	0.0299489	0.256624	18	15	1596.82	0.994961	1	20	12	3993.75	0.134488	0.756183	19	13.6167	3371.35	1707.78	0.506558	5675	3997	6885	2644	1769	1348	3091	1578	3669	4841	4351	3114	2853	2149	3761	1952	3354.81
1095	unknown1521	0.0299489	0.256624	18	15	24547.9	0.522164	1	20	12	64886	0.0806627	0.671246	19	13.6167	53128.5	26086	0.490999	90113	52899	87175	35864	27036	21569	36474	23475	61804	70380	71127	56233	48860	46457	71455	45094	52875.9
1117	unknown1541	0.0299489	0.256624	18	15	15056.6	0.524346	1	20	12	28156	0.0809343	0.671246	19	13.6167	22927.5	13902.1	0.606352	41796	18405	30845	36994	10372	11469	7572	5608	21929	33612	24232	32851	19935	10977	28892	29197	22792.9
1122	unknown1546	0.0299489	0.256624	24	18	908.279	0.694787	1	24.8451	17.9999	3038.49	0.101386	0.704773	24.4225	18.0054	1772.66	1255.53	0.708277	1137	411	5162	276	238	174	1596	477	2140	841	1510	1981	2067	2829	1971	5287	1756.06
1161	unknown1581	0.0299489	0.256624	18	15	1018.23	0.717851	1	20	12	2754.75	0.104049	0.704773	19	13.6167	2374.09	1016.48	0.428155	3656	2493	4047	2020	1025	933	2104	1347	2639	2933	2798	2649	1753	1780	3286	2365	2364.25
1173	unknown1592	0.0299489	0.256624	18	9	513.536	0.593162	1	26.8085	6	4685.5	0.0893656	0.671246	22.4043	8.10821	4239.73	469.582	0.110758	3798	4175	3463	2614	4450	5082	4299	4911	4121	4099	4547	4682	4149	4242	3884	4778	4205.88
1224	unknown1638	0.0299489	0.256624	18	6	3808.48	0.998689	1	20	5.99999	10429.2	0.13488	0.756183	19	6.01666	7589.07	3464.44	0.456504	7205	2915	4758	1071	7812	9082	12522	12301	6807	6599	2357	3591	13506	5315	7543	11324	7169.25
1255	unknown1666	0.0299489	0.256624	18	3	248.371	0.245186	1	25.1282	6.63e-05	2685.49	0.0434269	0.557105	21.5641	1.79704	2377.06	1143.65	0.481121	4227	2307	2812	1396	1802	2141	1808	1328	1434	1571	2254	1645	4738	2446	3409	3759	2442.31
1267	unknown1677	0.0299489	0.256624	18	15	3134.78	0.855013	1	20	12	6478	0.119453	0.751452	19	13.6167	4938.45	2872.87	0.581735	11091	3521	6467	2577	1826	1941	2766	1894	6327	7410	7313	4862	3426	2149	10634	4366	4910.62
1567	unknown388	0.0299489	0.256624	24	18	612.001	0.489595	1	27.4766	18	3673.25	0.0765758	0.65697	25.7383	18.0825	2930.64	479.977	0.163779	3687	2451	2797	1158	1975	2275	2794	2428	3279	3142	2542	3305	4443	2546	4369	3335	2907.88
1616	unknown431	0.0299489	0.256624	18	6	1809.49	0.996094	1	20	6	7050.75	0.134607	0.756183	19	6.01667	5387.36	2008.79	0.37287	3819	3290	4420	1729	5593	6336	8090	8184	4072	3949	3105	3125	7275	4028	8539	6749	5143.94
1644	unknown457	0.0299489	0.256624	18	15	1720.04	0.385141	1	20	12	4868.75	0.0630065	0.642953	19	13.6167	3692.74	1766.96	0.478496	5841	3420	4727	2077	1877	2123	2254	2554	4541	5530	5001	4403	3790	2556	4751	3365	3675.62
1651	unknown463	0.0299489	0.256624	24	21	3207.44	0.491491	1	26.6465	17.9999	16525.2	0.0768155	0.65697	25.3233	19.632	12649	2760.94	0.218273	14247	12523	17581	3700	9406	8972	11275	11573	10193	10959	13029	10492	16986	15457	18021	15637	12503.2
1717	unknown522	0.0299489	0.256624	24	18	980.757	0.158545	1	22.1053	17.9999	4600	0.0301514	0.516716	23.0526	18.0304	3648.95	804.97	0.220603	4660	2121	4587	2556	1901	1870	3191	3078	4313	3919	3769	4460	4553	4248	4888	4711	3676.56
1719	unknown524	0.0299489	0.256624	24	18	31052.2	0.440153	1	28	17.9999	102334	0.0702461	0.65697	26	18.1071	57035.9	29411.2	0.515661	25260	15187	111332	13114	13957	12198	87524	19053	81924	27703	26214	44756	82789	109295	92549	124705	55472.5
1726	unknown530	0.0299489	0.256624	24	12	419.138	0.261182	1	23.9024	12	5459	0.0457657	0.561442	23.9512	12.0001	4848.82	632.952	0.130537	4737	4517	4525	3208	4768	4526	4866	5356	5135	5863	5706	5132	5492	4381	4884	4469	4847.81
1743	unknown546	0.0299489	0.256624	18	6	1345.62	0.999783	1	20	6	4438.25	0.134995	0.756183	19	6.01667	3221.09	1524.81	0.473384	2087	1127	1721	959	3413	3427	5141	5772	1691	1865	1512	1515	5160	2153	6224	4814	3036.31
1762	unknown563	0.0299489	0.256624	18	3	606.344	0.223046	1	24.1644	6.63e-05	5162.24	0.0401377	0.546021	21.0822	1.75688	4401.38	1514.28	0.344046	6993	4830	5975	2851	3601	3922	4054	3551	2739	3104	4542	3201	5728	5184	5824	6138	4514.81
1885	unknown674	0.0299489	0.256624	24	18	2741.1	0.291453	1	22.6735	17.9999	9100.5	0.0501127	0.585954	23.3368	18.0145	6811.12	1555.95	0.228443	8137	3502	7271	4092	3088	3529	5926	4272	10056	8160	7320	7803	7367	4664	13125	11246	6847.38
1919	unknown704	0.0299489	0.256624	24	18	3322.34	0.0723126	1	20	12	14393	0.0154522	0.459212	22	14.85	11151	5384.73	0.482893	12546	9911	11432	7644	6301	5547	9667	8173	12975	14869	16751	12977	12086	9478	15040	13820	11201.1
1973	unknown753	0.0299489	0.256624	24	21	8993.69	0.238509	1	26.0177	17.9999	45934.9	0.0424414	0.554937	25.0088	19.5924	33103.5	10068	0.304136	47726	27754	36514	17379	21746	21710	27690	26353	30343	25021	32313	24771	46766	31691	56024	49259	32691.2
2057	unknown829	0.0299489	0.256624	18	15	13380.2	0.493634	1	20	12	29745.2	0.077086	0.65697	19	13.6167	23707.3	13209.1	0.557174	43974	24346	39736	11971	9036	7084	14386	10293	32482	30788	29171	26540	21253	20506	34807	20897	23579.4
2066	unknown837	0.0299489	0.256624	18	6	889.187	0.999872	1	20	5.99999	3250	0.135004	0.756183	19	6.01666	2425.66	1021.98	0.421322	1697	911	2117	508	2351	2167	4546	3936	2042	1456	958	1694	3672	1906	4439	2429	2301.81
2104	unknown871	0.0299489	0.256624	18	15	3710.19	0.356995	1	20	12	9732.25	0.0592134	0.621344	19	13.6167	7607.87	3690.99	0.485154	12715	7932	10204	3518	3361	3446	5013	4269	10057	10822	9445	8605	7275	6550	10644	7298	7572.12
2121	unknown887	0.0299489	0.256624	18	6	759.786	0.999992	1	20	5.99999	3287.25	0.135017	0.756183	19	6.01666	2606.91	879.174	0.337247	1787	1946	1748	640	2845	2352	3803	4149	1482	1919	1608	1754	4154	1922	4453	3444	2500.38
2132	unknown897	0.0299489	0.256624	24	12	580.358	0.242141	1	25.1282	12	7203.5	0.0429781	0.554937	24.5641	12.0063	6575.02	726.201	0.110448	5538	6590	6107	5033	6448	6925	6647	7071	6488	7694	7657	6975	7350	6232	5897	6765	6588.56
2155	unknown917	0.0299489	0.256624	24	21	534.926	0.260869	1	26.6465	17.9999	3403.74	0.0457202	0.561442	25.3233	19.632	2312.03	792.23	0.342655	3485	1672	2315	1166	1611	1596	1634	1858	2211	1608	1888	1664	3842	2080	4074	3619	2270.19
2211	unknown968	0.0299489	0.256624	24	18	806.102	0.37859	1	26.4865	17.9999	3227.49	0.0621294	0.637485	25.2432	18.0437	1660.36	1306.32	0.78677	853	221	4039	803	187	227	2085	269	1520	542	930	1234	2141	3692	2372	4705	1613.75
2225	unknown980	0.0299489	0.256624	18	3	284.964	0.265584	1	24.9858	6.63e-05	4019.74	0.046404	0.564656	21.4929	1.79111	3593.51	1288.36	0.358525	5718	3956	4580	1825	2739	2998	3016	2887	2705	2486	3566	2611	5059	3846	5225	5507	3670.25
2231	unknown986	0.0299489	0.256624	18	15	34308.5	0.39121	1	20	12	76900	0.0638161	0.645563	19	13.6167	56468.4	35091.3	0.621432	89303	53754	93633	26940	21539	14274	34362	22066	91766	85022	60490	70322	42911	44630	93560	53485	56128.6
353	PE 38:3|PE 20:0_18:3	0.0359573	0.277096	18	6	336.583	0.99313	1	20	6	826.75	0.154708	0.805846	19	6.01667	585.351	285.533	0.487797	217	477	284	205	693	723	953	938	344	219	191	284	1029	398	1123	734	550.75
1100	unknown1526	0.0359573	0.277096	18	3	61.1647	0.408637	1	26.3284	17.9999	4045.98	0.0767051	0.65697	22.1642	20.5056	1359.36	1698.63	1.24957	5042	403	316	47	0	315	228	331	755	223	0	215	7747	1135	3718	3584	1503.69
33	Cer 34:1;3O|Cer 14:0;2O/20:1;O	0.0419656	0.277096	18	6	9093.22	0.999718	1	20	6	21133.8	0.174997	0.841424	19	6.01667	14384.4	8559.21	0.595034	5894	3082	5520	2016	15533	18761	23048	27193	5073	4602	3937	3938	28879	10933	28372	26774	13347.2
49	Cer 36:1;3O|Cer 14:1;2O/22:0;(2OH)	0.0419656	0.277096	18	6	63940.5	0.995527	1	20	6	129176	0.174439	0.841424	19	6.01667	84710	54211.9	0.63997	44294	18852	33197	9954	106927	123147	147794	138835	32510	32914	27510	27634	148285	57207	160022	141168	78140.6
56	Cer 36:4;4O|Cer 15:3;3O/21:1;(2OH)	0.0419656	0.277096	18	6	29163.6	0.9976	1	20	6	52752.8	0.174715	0.841424	19	6.01667	33973.8	23488.9	0.691382	10391	4894	8082	3729	46291	48981	59999	55740	7296	7933	7343	6959	68763	54342	56916	50379	31127.4
78	Cer 40:2;3O|Cer 16:2;2O/24:0;(2OH)	0.0419656	0.277096	18	15	2117.08	0.745002	1	20	12	5249.25	0.139604	0.759536	19	13.6167	3764.54	2295.14	0.609673	6594	3685	5865	1845	1626	1886	2918	1914	5282	5654	5167	4894	2791	2627	4443	2686	3742.31
112	CL 70:7|CL 16:1_18:2_18:2_18:2	0.0419656	0.277096	18	15	6530.66	0.778091	1	20	12	22028.8	0.144386	0.77885	19	13.6167	17039.9	7976.4	0.468102	32480	17705	17255	8561	9347	7954	13650	9422	21582	25062	25115	16356	15190	9604	24908	17211	16962.6
129	DG 38:3	0.0419656	0.277096	24	18	3802.47	0.300179	1	21.8859	17.9999	11736	0.0677008	0.65697	22.9429	18.0383	8889.41	2212.66	0.24891	13360	5994	9821	3067	5338	5672	5201	5209	13069	12223	7982	9721	13922	6996	14305	11721	8975.06
163	HexCer 34:0;2O	0.0419656	0.277096	18	6	244.659	0.999975	1	28	5.99999	841.75	0.175031	0.841424	23	6.29761	656.615	123.071	0.187432	524	320	526	232	836	820	891	820	472	476	389	503	1043	527	1177	882	652.375
176	LPC 15:0	0.0419656	0.277096	24	18	837.745	0.520717	1	20.6557	17.9999	2693.25	0.105403	0.706358	22.3279	18.1015	1876.03	861.233	0.459071	1785	1043	4420	1108	377	485	1716	493	3395	1325	1559	2436	2102	3664	2193	2814	1932.19
179	LPC 16:1	0.0419656	0.277096	24	18	413610	0.297594	1	27.3065	17.9999	1.46174e+06	0.0672258	0.65697	25.6533	18.075	798844	495889	0.620759	388196	189088	1481619	442096	141469	134580	1091501	226939	1032885	341767	404804	698637	1013650	1650791	1287431	1895089	776284
181	LPC 17:1	0.0419656	0.277096	24	18	2008.71	0.643189	1	24.1644	18	5822.49	0.124492	0.756183	24.0822	18.0002	3883.34	1766.71	0.454945	2295	1890	8800	1502	1879	1249	3462	1327	5893	3196	2539	4736	3004	6997	5364	7925	3878.62
196	LPE 17:1	0.0419656	0.277096	24	21	275.772	0.834607	1	20.9501	17.9999	1214	0.152417	0.800295	22.4751	19.4879	927.298	352.47	0.380105	633	447	2527	1127	370	358	905	553	1097	615	860	881	1018	1169	1218	1451	951.812
370	PE-Cer 36:0;2O|PE-Cer 21:0;2O/15:0	0.0419656	0.277096	18	6	3205.49	0.999938	1	20	6	7848	0.175026	0.841424	19	6.01667	5600.13	2887.81	0.515668	2952	1816	2583	986	6396	7030	10197	7769	2552	2690	2241	2355	9477	4054	12088	8817	5250.19
542	unknown1023	0.0419656	0.277096	24	18	10581.5	0.45799	1	22.2166	17.9999	28401.7	0.0951729	0.682303	23.1083	18.0268	20932.5	6257.61	0.298942	34270	12678	24348	6916	11521	12828	12082	12374	29408	28785	16586	22731	33652	13701	36690	29564	21133.4
543	unknown1024	0.0419656	0.277096	18	0	1077.63	0.978838	1	20	12	6417	0.172209	0.841424	19	15.2	5861.54	1261.19	0.215163	7260	6619	7369	7454	5106	5498	4917	4247	5700	6573	6823	6572	5460	4592	5749	5891	5989.38
581	unknown1059	0.0419656	0.277096	24	18	2774.69	0.203554	1	22.9091	17.9999	12323.7	0.0492268	0.581653	23.4545	18.0097	9950.5	1724.02	0.17326	12149	7352	11086	5486	6531	8753	7133	6845	12670	12137	9229	11064	14979	9596	12083	12637	9983.12
591	unknown1068	0.0419656	0.277096	18	6	7409.24	0.989401	1	20	6	14378.5	0.173622	0.841424	19	6.01667	8852.85	6622.65	0.748081	3572	1831	2356	715	11746	14006	16737	15025	2702	3427	2382	2031	15810	4349	19948	12168	8050.31
612	unknown1087	0.0419656	0.277096	24	18	2401.69	0.410652	1	21.7778	17.9999	8272.25	0.0872161	0.671246	22.8889	18.0425	6481.39	1534.66	0.23678	9971	4826	7315	2736	4104	4266	4769	3877	8504	8660	5529	7061	9941	5115	9346	8687	6544.19
629	unknown1101	0.0419656	0.277096	18	15	3145.39	0.46017	1	20	12	7260.75	0.0955342	0.682303	19	13.6167	5717.32	2989.16	0.522825	9619	5775	9172	2786	2405	2303	3479	2805	8118	7941	6897	6087	5095	4540	8440	5552	5688.38
657	unknown1127	0.0419656	0.277096	24	15	422.32	0.71866	1	24.7059	12	2988.5	0.135754	0.756183	24.3529	13.5246	2599.03	406.399	0.156366	3560	2275	1114	1798	2366	2463	2587	2294	2769	3021	3171	2993	3072	2583	3009	2551	2601.62
673	unknown1141	0.0419656	0.277096	24	18	3104.2	0.469811	1	26.8085	17.9999	10818.2	0.097127	0.687855	25.4043	18.0551	5119.96	4346.56	0.848943	1304	362	13175	1841	154	323	6802	699	5349	1005	1378	3498	5835	11887	8127	17424	4947.69
698	unknown1164	0.0419656	0.277096	18	6	6544.98	0.999676	1	20	6	17552.2	0.174991	0.841424	19	6.01667	12463.4	6415.97	0.514784	6483	4039	6427	2915	13536	15432	21210	20031	5680	6442	4901	5293	21004	9439	23976	20167	11685.9
741	unknown1202	0.0419656	0.277096	24	18	47086.9	0.335133	1	25.1282	17.9999	211798	0.074035	0.65697	24.5641	18.0095	166507	29789.9	0.178911	188810	128496	150463	103532	129961	146397	116571	108899	167356	206027	190774	171351	268310	103881	249814	225188	165989
770	unknown1229	0.0419656	0.277096	18	6	2175.24	0.999247	1	20	6	5152.5	0.174934	0.841424	19	6.01667	3325.34	2240.67	0.673818	1652	602	1073	171	3627	4629	6451	5903	1061	1583	721	559	7046	1416	7825	4542	3053.81
820	unknown1274	0.0419656	0.277096	18	15	874.691	0.787322	1	20	12	3323	0.145709	0.77885	19	13.6167	2877.33	898.981	0.312436	3790	2557	4796	1986	1665	1820	2371	2213	2821	3396	3482	3593	2816	2600	3344	2648	2868.62
828	unknown1281	0.0419656	0.277096	18	15	910.754	0.912721	1	20	12	3510.75	0.163256	0.831086	19	13.6167	2791.37	1122.65	0.402185	3917	2917	2899	2572	1779	2098	2090	1502	2786	4090	4764	2403	2174	1300	4829	2368	2780.5
861	unknown1310	0.0419656	0.277096	18	6	802.213	0.99947	1	28	6.00002	3178.25	0.174964	0.841424	23	6.29763	2620.58	368.848	0.14075	2165	1297	2334	1045	2508	2838	3746	3621	1763	2020	2006	2132	3813	2539	4467	3432	2607.88
866	unknown1315	0.0419656	0.277096	24	18	2507.75	0.148948	1	20.3695	17.9999	8303.24	0.0379733	0.542617	22.1848	18.1213	5987.63	2321.31	0.387685	6717	2275	9477	6948	1791	1899	5092	1578	9006	6215	5678	8579	5733	10031	8403	9046	6154.25
868	unknown1317	0.0419656	0.277096	18	15	1385.93	0.425122	1	20	12	4271.5	0.0896714	0.671246	19	13.6167	3201.72	1584.33	0.494837	4338	2853	4604	1836	1758	1286	2572	1605	5761	4423	3177	3725	2731	2415	4699	3199	3186.38
872	unknown1320	0.0419656	0.277096	18	15	8112.64	0.674393	1	20	12	21924.8	0.129191	0.756183	19	13.6167	18984.1	8428.39	0.443972	32789	16044	18853	31295	9451	8793	14054	8164	24582	23714	21442	17961	15486	11976	27597	20238	18902.4
898	unknown1344	0.0419656	0.277096	18	6	2258.5	0.998946	1	28	6.00001	9960.75	0.174894	0.841424	23	6.29763	8135.27	1281.21	0.157488	6599	3863	6378	3491	7937	8715	11969	11222	5717	6685	5910	6346	11603	7723	14385	10915	8091.12
988	unknown1425	0.0419656	0.277096	18	15	2234.81	0.999056	1	20	12	4807.25	0.174909	0.841424	19	13.6167	3758.1	2159.84	0.574715	7496	5393	5689	2277	2471	2243	2401	1692	3910	6375	5742	3202	2577	1618	4127	2582	3737.19
1058	unknown1489	0.0419656	0.277096	18	6	6064.15	0.998307	1	28	6	12799.8	0.174809	0.841424	23	6.29762	8672.4	1909.27	0.220155	3318	1882	2803	1303	12637	10062	15611	12889	2279	2566	2300	2484	22405	19807	12491	12869	8606.62
1080	unknown1508	0.0419656	0.277096	18	15	2283.6	0.526733	1	20	12	7832.25	0.106367	0.710696	19	13.6167	5954.55	2579.81	0.433251	9674	4624	5872	3965	3154	3623	4872	3236	7585	9118	7477	7149	5134	3906	10206	5278	5929.56
1081	unknown1509	0.0419656	0.277096	18	15	60078.1	0.121272	1	20	12	112893	0.0319637	0.517839	19	13.6167	80796	53135.9	0.657655	124892	32921	56583	137426	16342	23843	27006	31919	134102	111124	93388	112957	93099	77483	113300	98119	80281.5
1090	unknown1517	0.0419656	0.277096	24	18	895.197	0.50527	1	25.1282	17.9999	2505.74	0.102915	0.704773	24.5641	18.0095	1536.82	859.618	0.55935	1067	400	3626	363	315	288	1694	408	2136	956	1211	1863	1739	2912	2092	3280	1521.88
1112	unknown1537	0.0419656	0.277096	24	21	1062.78	0.253007	1	22.5575	17.9999	7069.24	0.0588771	0.621344	23.2788	19.4722	5416.12	1261.9	0.232989	5994	3139	7122	5530	2956	2580	5526	3098	5980	4919	5346	6835	5409	6415	6856	9597	5456.38
1125	unknown1549	0.0419656	0.277096	24	18	531.744	0.659676	1	21.3559	17.9999	3214	0.126983	0.756183	22.678	18.0613	2608.22	678.839	0.260269	4759	2320	2474	1698	1660	1964	1989	1811	2895	3035	2528	2283	4083	2350	3706	2717	2642
[truncated: 43 more rows]

## Sheet: total proteinAM
ID	CycID	JTK_pvalue	JTK_BH.Q	JTK_period	JTK_adjphase	JTK_amplitude	LS_pvalue	LS_BH.Q	LS_period	LS_adjphase	LS_amplitude	meta2d_pvalue	meta2d_BH.Q	meta2d_period	meta2d_phase	meta2d_Base	meta2d_AMP	meta2d_rAMP	0	0	0	0	6	6	6	6	12	12	12	12	18	18	18	18	ProteinM
[truncated: 2,245 more rows]

[truncated: 1 more sheets: total proteinAS]
