# Supplementary material for: The microbiome interacts with the circadian clock and dietary composition to regulate metabolite cycling in the Drosophila gut
Source: eLife journal article supplement (doi:10.7554/elife.97130), 2024-05-01
Supplement: supp1 [file Table20-Sugar-Lipids-AM versus AS.xlsx]

## Sheet: unique cycling in sugarAM
CycID	JTK_pvalue	JTK_BH.Q	JTK_period	JTK_adjphase	JTK_amplitude	LS_pvalue	LS_BH.Q	LS_period	LS_adjphase	LS_amplitude	meta2d_pvalue	meta2d_BH.Q	meta2d_period	meta2d_phase	meta2d_Base	meta2d_AMP	meta2d_rAMP	0	0.1	0.2	0.3	6	6.1	6.2	6.3	12	12.1	12.2	12.3	18	18.1	18.2	18.3	SugarM
unknown304	2.89e-06	0.00436092	24	0	2391.08	0.0147787	0.898568	21.5648	5.29e-05	7617.49	7.66e-07	0.00172069	22.7824	2.79e-05	4968.97	3130.36	0.629981	6932	7057	8003	8478	6212	4574	4766	4705	887	1321	2382	2294	5297	5282	6818	6742	5109.38
unknown975	7.77e-06	0.00436092	18	6	2414.42	0.268375	1	20	6	7332	2.94e-05	0.00705273	19	6.01667	5449.15	1841.45	0.337934	5692	3906	4181	4341	8084	6494	7917	6833	4040	2359	2753	2196	5742	5760	6048	7270	5226
unknown554	1.91e-05	0.00591839	18	3	722.84	0.077733	0.898568	25.7143	7.71e-05	2057.75	2.14e-05	0.00600579	21.8571	1.82146	1802.91	2065.69	1.14576	2720	1218	1710	2583	1751	1244	1257	928	388	430	740	526	3677	3226	4387	3622	1900.44
LPC 15:0	4.22e-05	0.00591839	18	12	1415.98	0.107932	0.957733	20	12	3957	6.05e-05	0.00893254	19	12.0333	2109.36	2183.36	1.03508	2391	651	774	1771	1745	918	2663	1812	5016	3802	3292	3718	230	304	219	317	1851.44
unknown421	4.22e-05	0.00591839	18	12	4624.83	0.151266	1	25.1282	12	17415.2	8.27e-05	0.00893254	21.5641	12.337	10455.8	10174.5	0.973097	13982	5093	4758	10747	13586	6178	15844	12469	19905	17811	17509	14436	858	1097	877	1755	9806.56
unknown616	4.22e-05	0.00591839	18	15	13617.1	0.255954	1	20	12	44262.2	0.000134264	0.00941949	19	13.6167	26627.8	21322.2	0.800748	31365	22701	33550	25593	19336	6265	18677	14363	40030	46785	55941	34293	18731	10343	22003	22765	26421.3
unknown805	4.22e-05	0.00591839	18	6	2605.51	0.0924381	0.898568	20	6	7907.75	5.25e-05	0.00841245	19	6.01667	5491.7	2113.7	0.38489	5944	4832	4572	5110	10359	6772	8211	6289	1828	1489	1716	1755	5769	5483	7080	6560	5235.56
Cer 34:0;2O|Cer 14:0;2O/20:0	8.77e-05	0.00820268	18	6	16133	0.194902	1	20	6	45324.8	0.000204698	0.0115724	19	6.01667	29355.7	14477.6	0.493179	31203	20544	24553	25317	70225	31582	42895	36597	6181	5282	7154	6425	30670	25623	39982	37388	27601.3
Cer d34:0	8.77e-05	0.00820268	18	6	49228.8	0.17032	1	20	6	155120	0.000180894	0.0112807	19	6.01667	101959	46841.6	0.459415	113665	80263	92826	83437	244992	109558	126059	139869	21901	19605	17675	16114	125883	98710	131673	118295	96282.8
unknown1051	8.77e-05	0.00820268	24	15	1575.08	0.0756247	0.898568	20	12	8388.5	8.57e-05	0.00893254	22	13.475	3751.69	5884.16	1.5684	1530	799	1042	1387	3151	1603	1912	2438	5652	4178	13042	10682	1793	1962	3487	2837	3593.44
unknown1565	8.77e-05	0.00820268	18	15	3465.71	0.290998	1	20	12	8981	0.000295395	0.0125125	19	13.6167	3690.59	5778.74	1.5658	5829	2461	2970	2771	1148	751	847	1189	6154	6006	15805	7959	1009	682	1323	1250	3634.62
unknown691	8.77e-05	0.00820268	18	3	1655.69	0.232938	1	23.52	7.09e-05	4400.24	0.000241004	0.0118335	20.76	1.73003	3284.97	2785.99	0.848101	4825	2563	4358	5855	4308	2190	2258	2372	915	1159	1681	1250	5017	2895	8843	5990	3529.94
unknown1617	0.000129537	0.00874449	24	15	1089.47	0.0714302	0.898568	20	12	6089	0.000116499	0.00941949	22	13.475	2627.33	4430.19	1.68619	1094	537	825	709	2137	1348	1503	1132	4187	3009	9550	7610	1442	1132	2348	1568	2508.19
CL 72:8|CL 18:2_18:2_18:2_18:2	0.000171384	0.00874449	24	15	12307.7	0.0625914	0.898568	21.5648	12	42457.2	0.000133475	0.00941949	22.7824	13.4583	22824.1	23975.1	1.05043	7689	4773	8875	7921	28392	11327	15365	17646	29457	30519	63283	46570	22214	13603	31108	19158	22368.8
LPE 22:6	0.000171384	0.00874449	18	12	368.226	0.139161	1	24.5682	12	1199.25	0.000277703	0.0121883	21.2841	12.2927	718.316	715.58	0.996192	941	215	284	535	1542	325	807	962	1229	1462	1115	991	66	40	50	116	667.5
PE-Cer 34:1;3O	0.000171384	0.00874449	24	3	9938.39	0.0130858	0.898568	20.5594	6.63e-05	30348	3.14e-05	0.00705273	22.2797	1.39252	20356.9	14584.3	0.716429	28904	31111	30579	30798	33797	20719	23269	25676	6682	6741	5947	4787	23027	19254	23895	20697	20992.7
PE-Cer 35:1;2O|PE-Cer 17:0;2O/18:1	0.000171384	0.00874449	18	6	388.025	0.574572	1	20	6	2002.75	0.00100695	0.0198299	19	6.01667	1642.73	343.334	0.209002	1400	1374	1702	1426	2666	1540	1891	1914	1022	906	1129	961	1845	1531	2448	1863	1601.12
TG 38:1|TG 12:0_12:0_14:1	0.000171384	0.00874449	18	15	365775	0.240694	1	20	12	1.24863e+06	0.000457715	0.0155979	19	13.6167	666453	647986	0.97229	703709	520705	820147	556529	458214	165767	425533	311613	1064240	1385238	1789799	755233	395874	197236	464492	548521	660178
unknown1054	0.000171384	0.00874449	18	3	1172.91	0.293675	1	25.8651	5.82e-05	3218	0.000548453	0.0158777	21.9326	1.82774	2962.99	3184.45	1.07474	3809	1853	3001	4209	3848	1837	1797	1778	805	960	1269	910	6020	2505	8420	6670	3105.69
unknown1129	0.000171384	0.00874449	18	15	151373	0.240731	1	20	12	507010	0.00045778	0.0155979	19	13.6167	270244	263996	0.976879	293046	205382	338605	223451	181790	72515	167908	129904	425359	560076	727029	315578	156513	85712	184818	215318	267688
unknown1149	0.000171384	0.00874449	18	12	10783.7	0.23441	1	20	12	33659.8	0.000446829	0.0155979	19	12.0333	16329.4	20179.6	1.23578	17499	2712	2529	9789	13575	3281	26983	11592	56467	37785	24478	15909	67	65	0	397	13945.5
unknown1189	0.000171384	0.00874449	18	15	3248.09	0.0725026	0.898568	20	12	11176	0.000152784	0.010394	19	13.6167	4560.42	6568.32	1.44029	3750	1976	3912	2855	2101	910	1998	1216	9186	12865	16067	6586	2115	1654	2320	2438	4496.81
unknown1274	0.000171384	0.00874449	18	15	2349.72	0.038751	0.898568	20	12	8493	8.58e-05	0.00893254	19	13.6167	3699.85	4824.79	1.30405	2713	2870	3062	2906	1672	1387	1787	1600	9610	9048	7965	7349	1694	1480	1822	1485	3653.12
unknown1300	0.000171384	0.00874449	18	12	16599.3	0.298652	1	20	12	43487	0.000556888	0.0158777	19	12.0333	22141.7	25535.7	1.15329	27446	2062	1470	15223	15752	3786	45422	20723	69693	52145	30450	21660	0	101	0	68	19125.1
unknown1441	0.000171384	0.00874449	18	15	3094.3	0.125929	1	20	12	10688	0.000253454	0.0118335	19	13.6167	5796.57	5163.72	0.890823	6009	4375	5690	4668	3788	2401	3653	3221	9321	9448	15716	8267	3449	3056	4813	4070	5746.56
unknown739	0.000171384	0.00874449	18	12	28726.6	0.261507	1	20	12	85257.8	0.000493578	0.0156842	19	12.0333	48098.9	45999.3	0.956348	66670	19771	18258	41874	33322	23226	77367	44615	113525	86841	82090	58575	3962	3396	1736	7410	42664.9
unknown744	0.000171384	0.00874449	18	6	19334.6	0.271339	1	20	6	50578.5	0.000510418	0.0156971	19	6.01667	35584.5	13839.8	0.388929	37742	23495	31507	28714	69552	38175	51955	42632	9375	8385	10899	10753	42308	34017	54229	48780	33907.4
Cer 35:2;3O|Cer 17:1;2O/18:1;(3OH)	0.000320124	0.0110566	18	15	4385.12	0.0211801	0.898568	20	12	19934.5	8.75e-05	0.00893254	19	13.6167	7551.09	11606.8	1.5371	4156	3755	4540	3726	3392	2134	2962	2907	20413	19411	22776	17138	3089	2381	3352	2887	7438.69
Cer d34:1	0.000320124	0.0110566	18	6	40757.6	0.268301	1	20	6	105498	0.000890026	0.0193991	19	6.01667	74229.4	28704.3	0.386698	78282	49282	64408	63608	148817	81052	107773	84351	21108	17274	22858	21022	87062	71994	110594	102531	70751
LPE 18:2	0.000320124	0.0110566	18	12	88936.9	0.21095	1	20	12	314854	0.000716019	0.0182468	19	12.0333	182383	168545	0.924128	228443	74255	69332	160579	218384	89766	277854	175035	440927	331155	273016	214316	9353	11000	4940	21196	162472
LPE 18:3	0.000320124	0.0110566	18	12	8181.93	0.254409	1	20	12	35697	0.000848274	0.018981	19	12.0333	21708.7	16465.8	0.75849	21229	12014	11483	16997	25937	9819	25155	18641	50948	45711	27095	19034	9135	7213	9240	6565	19763.5
PE P-34:1 or PE O-34:2	0.000320124	0.0110566	18	15	4313.35	0.114566	0.97795	20	12	15922.2	0.000411256	0.0151356	19	13.6167	7906.69	7964.43	1.0073	6445	5572	6921	6307	5665	3273	4126	4618	12720	11005	24280	15684	4873	2641	6063	5080	7829.56
TG 35:0|TG 11:0_12:0_12:0	0.000320124	0.0110566	18	15	2398.86	0.0877503	0.898568	20	12	9094.5	0.000322486	0.0133364	19	13.6167	4022	4949.76	1.23067	2823	2372	3237	2863	2490	1124	2059	1694	8033	9164	13913	5268	2547	1376	2037	2585	3974.06
unknown1076	0.000320124	0.0110566	18	15	177956	0.0917528	0.898568	20	12	662042	0.000335886	0.0133364	19	13.6167	295902	365351	1.2347	244587	156324	275598	199590	147858	63414	173564	126251	527552	763039	966068	391511	165361	113591	186080	177430	292364
unknown1178	0.000320124	0.0110566	18	15	9649.36	0.244219	1	20	12	29178.8	0.000817494	0.0189084	19	13.6167	15806.4	15647.8	0.989968	17959	13014	21380	13632	10667	2758	7944	8524	26630	30280	39524	20281	9564	5073	8980	14268	15654.9
unknown1579	0.000320124	0.0110566	18	12	8746.91	0.29168	1	20	12	36608	0.00095978	0.0195882	19	12.0333	19672.9	20316.1	1.0327	22029	10655	9030	17115	12884	9589	22887	18968	51844	49251	25722	19615	1903	1897	749	2228	17272.9
unknown1610	0.000320124	0.0110566	18	12	5348.91	0.287402	1	20	12	22183.8	0.000947064	0.0195882	19	12.0333	10978.8	13147.8	1.19757	10746	2839	1716	7520	9032	3248	16476	9772	35859	31535	11967	9374	176	231	17	301	9425.56
unknown1685	0.000320124	0.0110566	18	12	17334	0.249619	1	20	12	70660.5	0.000833821	0.0189084	19	12.0333	33394.3	42812.6	1.28203	32223	11518	7986	22321	26215	9637	37917	22053	111221	98651	43455	29315	175	170	14	516	28336.7
unknown766	0.000320124	0.0110566	18	15	13079.4	0.30193	1	20	12	50490.8	0.000990171	0.0198299	19	13.6167	30229.5	23703.6	0.784122	32955	25901	38041	27639	24095	8573	21234	15913	41879	53157	69427	37500	20275	10422	24534	28454	29999.9
unknown781	0.000320124	0.0110566	18	12	5292.69	0.208594	1	20	12	17817.2	0.00070877	0.0182468	19	12.0333	10181.8	9604.34	0.943286	12891	3580	3125	8608	12477	4276	16099	9564	25066	18796	15493	11914	498	561	501	1306	9047.19
unknown998	0.000320124	0.0110566	18	15	6671.91	0.290966	1	20	12	24246	0.000957658	0.0195882	19	13.6167	13740.5	12005.1	0.873702	14846	11153	18331	11486	10607	3019	9967	6787	20474	25944	33093	17473	8116	3245	10916	12531	13624.2
CL 72:10|CL 36:4_36:6	0.000572095	0.0132407	24	15	1575.08	0.0424464	0.898568	23.2718	12	7570	0.000282312	0.0121883	23.6359	13.4801	5704.95	2306.56	0.404308	4179	3020	4631	4002	7076	4470	4757	5766	7204	7411	7487	8178	5607	4710	6973	5577	5690.5
Cer 34:1;3O|Cer 14:1;2O/20:0;(2OH)	0.000572095	0.0132407	24	3	48887.6	0.0174321	0.898568	20	7.55e-05	143287	0.000124816	0.00941949	22	1.37504	98502.8	69907.5	0.7097	154946	128646	152500	137057	176393	102138	119200	123300	29986	26961	28401	23251	104355	88814	124217	115331	102218
Cer 35:1;4O|Cer 13:1;3O/22:0;(2OH)	0.000572095	0.0132407	18	15	46623.1	0.0385112	0.898568	20	12	259993	0.000258282	0.0118335	19	13.6167	157708	99855.3	0.633167	146352	127476	141686	127164	141843	88206	117409	116958	262485	257281	288392	231815	117476	95953	126118	121235	156741
Cer 36:0;2O|Cer 14:0;2O/22:0	0.000572095	0.0132407	18	6	13694.9	0.716745	1	20	6	41905.2	0.00360809	0.0399023	19	6.01667	29221.6	12263.5	0.419674	30692	16171	21900	21577	71539	25180	35446	35456	5171	3720	8390	5730	33199	22288	53876	53433	27735.5
LPE 16:0	0.000572095	0.0132407	18	12	1572.25	0.32026	1	20	12	7163.75	0.00175979	0.0276274	19	12.0333	4119.45	3654.31	0.887088	4534	2957	2622	3558	3166	1734	4958	3357	10542	8079	5306	4728	873	1104	496	990	3687.75
LPE 17:1	0.000572095	0.0132407	18	12	959.367	0.290824	1	20	12	4120.5	0.00161408	0.0268416	19	12.0333	2383.39	2066.66	0.867108	2294	1179	1009	2047	2709	1134	2773	2148	6321	5395	2579	2187	568	435	681	769	2139.25
TG 36:0|TG 12:0_12:0_12:0	0.000572095	0.0132407	18	15	1.11412e+06	0.072251	0.898568	20	12	3.70196e+06	0.000458556	0.0155979	19	13.6167	1.67365e+06	2.0377e+06	1.21751	1427014	898922	1573200	1149753	821071	337452	1019616	708334	3114590	4092093	5185003	2416141	971962	636567	1094158	1016855	1.65392e+06
unknown1003	0.000572095	0.0132407	18	15	10883.8	0.0786132	0.898568	20	12	36196.2	0.00049514	0.0156842	19	13.6167	16012.3	20357.7	1.27138	13232	8515	15510	11084	7539	2615	9487	6420	29753	41223	50834	22975	8806	5536	10142	9371	15815.1
unknown1011	0.000572095	0.0132407	18	15	1106.27	0.743439	1	20	12	6066.5	0.00372692	0.04042	19	13.6167	4668.57	1865.81	0.399654	5098	4639	6051	4303	3983	2451	3861	3706	5146	6056	8170	4894	4152	2483	4531	4884	4650.5
unknown1155	0.000572095	0.0132407	18	15	35829.8	0.309538	1	20	12	123280	0.0017069	0.0271869	19	13.6167	68409.9	63123	0.922717	78345	55760	89326	57740	50085	18749	43655	31762	105756	130842	176280	80241	40090	19072	48152	58923	67798.6
unknown1237	0.000572095	0.0132407	18	3	1002.85	0.309059	1	25.5652	7.41e-05	4158.99	0.00170453	0.0271869	21.7826	1.81525	3676.28	3440.23	0.93579	3494	2381	2789	7972	4176	2560	2470	2101	1072	1570	1751	1694	6992	3657	8971	7903	3847.06
unknown1359	0.000572095	0.0132407	18	6	11687.1	0.327162	1	20	6	34165	0.00179372	0.0279647	19	6.01667	24127.3	9206.35	0.381575	23275	18254	22846	18530	53095	25860	28768	28937	6327	6011	6273	6189	30870	25467	37160	30324	23011.6
unknown1609	0.000572095	0.0132407	18	12	3301.3	0.208485	1	20	12	8821.5	0.0011968	0.0224137	19	12.0333	4876.97	4962.4	1.01752	6112	671	411	3502	5927	917	10063	5644	12345	10338	6965	5638	66	53	0	0	4290.75
unknown1646	0.000572095	0.0132407	18	12	5460.46	0.342616	1	20	12	14446.2	0.0018694	0.0285498	19	12.0333	7198.05	8424.16	1.17034	12922	688	2192	4952	4839	2691	5777	5939	23437	13663	10809	9876	272	340	113	736	6202.88
unknown1666	0.000572095	0.0132407	18	15	1715.09	0.231289	1	20	12	6397	0.00131397	0.0235989	19	13.6167	3227.15	3365.38	1.04283	3406	2357	3883	2197	2145	975	1701	1925	5243	7220	9546	3579	1392	991	2218	2335	3194.56
unknown169	0.000572095	0.0132407	24	0	3368.66	0.0296306	0.898568	20	6.48e-05	11013.7	0.000203166	0.0115724	22	3.56e-05	7970.09	4496.53	0.564175	9237	11166	12653	10999	9684	7681	7446	8008	1829	1396	5199	4566	10828	8815	11564	12091	8322.62
unknown283	0.000572095	0.0132407	18	15	724.961	0.448588	1	20	12	3917.75	0.00237845	0.0319738	19	13.6167	2857.67	1257.03	0.439878	3202	2756	2821	3219	2379	1693	2720	2223	3481	3209	4654	4327	1708	2326	2497	2313	2845.5
unknown443	0.000572095	0.0132407	18	15	19325.6	0.0910458	0.898568	20	12	70773	0.000565798	0.0158777	19	13.6167	43215.3	30152.6	0.697731	45570	30712	47218	38368	30338	14347	35264	27561	62896	67981	87302	64913	34113	24221	39460	36508	42923.2
unknown573	0.000572095	0.0132407	18	15	4833.43	0.0789622	0.898568	20	12	15920.5	0.000497138	0.0156842	19	13.6167	8645.77	7811.36	0.903489	8790	5756	8829	7435	5178	1743	6487	4523	13925	15447	20925	13385	6370	4039	7685	6605	8570.12
unknown583	0.000572095	0.0132407	18	15	35694.4	0.0779095	0.898568	20	12	117462	0.000491108	0.0156842	19	13.6167	65418.9	56288.9	0.860438	68377	42363	72271	55754	39649	14687	53144	35404	103882	118919	143682	103365	50633	33109	53864	48877	64873.8
unknown738	0.000572095	0.0132407	18	15	19731.8	0.0799894	0.898568	20	12	68871.2	0.000503014	0.0156842	19	13.6167	34531	35363.6	1.02411	31978	21874	34020	26453	19928	6831	24950	17270	60116	73792	93457	48120	22464	14826	26284	24653	34188.5
unknown980	0.000572095	0.0132407	18	15	2250.72	0.0879439	0.898568	20	12	8675.75	0.000548265	0.0158777	19	13.6167	4465.29	4321.48	0.967794	4080	2854	3953	3530	2563	1230	2969	2164	7457	9062	12580	5604	3346	2147	3679	3557	4423.44
FA 16:1 (palmitoleic acid)	0.000987235	0.0164174	18	3	76392.3	0.0656752	0.898568	25.2722	6.63e-05	582934	0.0006901	0.0180148	21.6361	1.80304	526182	242269	0.460429	544176	455258	614866	717439	535587	276543	398322	448873	344447	298126	497845	398559	817767	733627	706994	841987	539401
GlcCer d38:1	0.000987235	0.0164174	18	6	1447.45	0.954697	1	20	6.00001	5832.75	0.00750894	0.0599914	19	6.01667	4400.55	1615.77	0.367175	3097	2246	3177	3199	7760	4246	5861	5464	2236	2310	2646	2007	4718	4338	7176	6795	4204.75
LPC 15:3	0.000987235	0.0164174	18	12	1931.82	0.0805745	0.898568	25.1282	12	11795.5	0.000830394	0.0189084	21.5641	12.337	7991.7	6508.78	0.814443	10039	4182	3213	7409	14221	5604	13729	10550	15612	11234	11221	9115	1194	1167	918	1814	7576.38
LPC 16:2/0:0	0.000987235	0.0164174	18	12	840.396	0.13745	1	24.9858	12	4319.75	0.00134408	0.0237595	21.4929	12.3255	2885.3	2293.97	0.795056	3538	1182	1336	2925	4376	1827	5361	3321	5899	4300	3372	3708	723	664	486	737	2734.69
LPC 18:2	0.000987235	0.0164174	18	12	659141	0.267207	1	24.8451	12	2.15342e+06	0.00243756	0.0322198	21.4225	12.3143	1.255e+06	1.32931e+06	1.05922	1949972	274106	227703	1255878	1326427	484949	2632205	1721958	2901524	2403817	1863808	1444518	39297	49035	19717	50021	1.16531e+06
LPC 22:6	0.000987235	0.0164174	18	12	339.058	0.148451	1	24.5682	12	1047.25	0.00144036	0.0246841	21.2841	12.2927	635.257	649.629	1.02262	766	145	228	365	1606	244	823	948	1074	727	1547	841	49	63	0	0	589.125
LPS 18:2	0.000987235	0.0164174	18	12	1652.51	0.0853379	0.898568	23.2718	12	5147	0.000874646	0.0192508	20.6359	12.199	2854.7	3105.26	1.08777	2967	112	505	1253	4699	1351	4623	3701	7238	5498	2933	4919	347	313	150	745	2584.62
unknown1064	0.000987235	0.0164174	18	15	2403.28	0.225861	1	20	12	11338.5	0.00209787	0.0299983	19	13.6167	6575.83	5029.01	0.764772	7106	4710	6623	6346	6161	3020	4375	3884	10186	9557	16623	8988	4015	2883	4705	5252	6527.12
unknown1115	0.000987235	0.0164174	24	3	2032.22	0.0174497	0.898568	20	5.93e-05	6524.25	0.00020619	0.0115724	22	1.37503	4745.76	3017.2	0.635769	6847	5936	7009	6305	8003	4886	5738	6060	1647	1823	1635	1594	4924	4407	5890	5794	4906.12
unknown1213	0.000987235	0.0164174	24	15	821.658	0.0200859	0.898568	20	12	5239.5	0.00023455	0.0118335	22	13.475	2684.53	3305.56	1.23134	1432	1682	1531	1147	1963	1372	2095	1495	4721	4019	6637	5581	2060	1714	2018	2063	2595.62
unknown1243	0.000987235	0.0164174	24	3	1576.49	0.0218861	0.898568	20	6.63e-05	4977.25	0.000253717	0.0118335	22	1.37504	3652.59	2097.29	0.574191	5340	4403	4915	5251	6527	3833	4729	4424	1764	1651	1032	1178	3555	3154	4432	4037	3764.06
unknown1257	0.000987235	0.0164174	18	15	1833.88	0.0805355	0.898568	20	12	6266.75	0.000830031	0.0189084	19	13.6167	2936.4	3268.63	1.11314	2232	1831	2742	1714	1562	795	1590	1774	4879	6657	9271	4260	1777	907	2321	2164	2904.75
unknown1260	0.000987235	0.0164174	18	9	1925.63	0.0786804	0.898568	24.4321	12	4839	0.000812721	0.0189084	21.2161	10.5142	3688.98	1643.72	0.445576	1901	1479	2006	2029	6467	2749	4185	4874	5385	6219	4178	3574	2418	2393	2967	3141	3497.81
unknown1280	0.000987235	0.0164174	18	6	5215.27	0.588596	1	20	6	16810.8	0.00491051	0.0486044	19	6.01667	12108.4	5231.82	0.432081	9605	6431	7041	8907	18701	12551	18552	17439	9382	10548	5992	6424	10853	13409	14154	13602	11474.4
unknown1288	0.000987235	0.0164174	18	6	750.417	0.241822	1	20	6.00001	3774	0.00222982	0.0309009	19	6.01667	3260.32	441.542	0.135429	3156	2897	2991	3507	3950	3961	3365	3820	1988	1651	2551	1877	3868	3361	4442	3924	3206.81
unknown1295	0.000987235	0.0164174	24	3	62309.9	0.0202593	0.898568	20	6.63e-05	196592	0.000236403	0.0118335	22	1.37504	144851	91198.8	0.629604	214990	174423	203940	193017	253257	151446	173263	184041	55575	54770	49839	45444	152901	132907	182766	172597	149698
unknown1312	0.000987235	0.0164174	18	15	21634.8	0.415292	1	20	12	79755	0.00360766	0.0399023	19	13.6167	52218.1	33398.9	0.639604	52995	47551	68460	59989	48755	26396	34410	34724	79248	79975	94614	65183	36322	29459	40333	31900	51894.6
unknown1340	0.000987235	0.0164174	18	12	4171.22	0.252288	1	24.0327	12	15509.5	0.00231578	0.0313188	21.0163	12.2524	8935.8	9208.09	1.03047	10444	3328	2536	7817	10747	4510	15271	11191	22477	21092	9476	8993	1011	1197	392	1036	8219.88
unknown1394	0.000987235	0.0164174	18	15	8464.07	0.0512626	0.898568	20	12	38167.8	0.000551194	0.0158777	19	13.6167	17584	21030	1.19598	16294	11152	16288	15290	13835	5866	5637	8824	35526	37995	41388	37762	7964	5743	11358	7163	17380.3
unknown1409	0.000987235	0.0164174	18	12	3216.98	0.0721329	0.898568	20	12	8500.75	0.000751277	0.0183328	19	12.0333	4625.71	4328.42	0.935731	4355	2653	3020	2923	4194	1272	3502	3668	8275	8645	9737	7346	1970	0	1957	2313	4114.38
unknown1537	0.000987235	0.0164174	18	12	2679.58	0.273883	1	24.9858	12	9895.5	0.00249179	0.0325237	21.4929	12.3255	6415.32	4978.87	0.77609	7960	4056	4295	5940	11599	3397	6172	6718	11366	10170	9955	8091	2259	2699	1209	1529	6088.44
unknown1562	0.000987235	0.0164174	18	3	1591.34	0.447077	1	20	6.63e-05	3971.5	0.00385123	0.040634	19	1.58336	3220.35	2334.76	0.725002	2930	3714	6005	3237	5454	2642	2409	3028	555	585	2449	1418	5457	3177	8490	6311	3616.31
unknown1569	0.000987235	0.0164174	18	3	819.714	0.216116	1	24.1644	7.95e-05	2680.24	0.00201677	0.0297872	21.0822	1.75688	2188.7	1577.59	0.72079	1670	3355	3702	1994	2827	1823	1089	1851	543	667	1760	1347	3856	2542	3845	4039	2306.88
unknown1615	0.000987235	0.0164174	18	6	1043.34	0.798247	1	20	6	4692.5	0.00641947	0.0540494	19	6.01667	2369.15	2443.39	1.03133	1018	362	620	1456	10916	1264	3344	3246	364	227	918	788	2114	1024	2692	2816	2073.06
unknown1709	0.000987235	0.0164174	18	12	12765.9	0.351227	1	24.7059	12	35954.8	0.00310923	0.0374712	21.3529	12.3034	20690	22429.8	1.08409	32524	3410	7729	15664	57177	6075	18414	20167	37928	32784	43737	29370	310	395	43	458	19136.6
unknown429	0.000987235	0.0164174	24	12	17338.3	0.0380388	0.898568	20	12	78700.5	0.000420211	0.0152157	22	12.1	36244.6	42448	1.17115	14290	10097	11727	10482	30773	16042	24790	19385	59169	52522	114918	88193	21555	11133	23834	30937	33740.4
unknown562	0.000987235	0.0164174	18	15	7663.98	0.332223	1	20	12	32643	0.00295924	0.0360895	19	13.6167	21446.1	13113	0.61144	23692	17776	27015	19210	18606	8343	16410	13928	28791	32239	43525	26017	15247	10290	18765	21252	21319.1
unknown632	0.000987235	0.0164174	18	6	1564.12	0.983675	1	20	6	5149.25	0.00770783	0.0610463	19	6.01667	4142.41	1147.36	0.276979	2983	2790	3285	2698	6581	3457	5361	5198	1248	1677	2525	1981	4869	3216	8565	7620	4003.38
unknown673	0.000987235	0.0164174	18	6	1675.84	0.805708	1	20	6	6865.25	0.00647207	0.0542157	19	6.01667	5578.02	1332.38	0.238862	4499	3974	4510	5297	9096	5670	6086	6609	2365	2172	4481	3093	6118	6048	8480	8167	5416.56
unknown70	0.000987235	0.0164174	18	3	1828.58	0.389102	1	20	6	5116.5	0.00340517	0.0388052	19	4.43333	4868.39	2353.24	0.483371	5353	3902	5318	4589	6809	3949	5052	4656	1819	1325	2966	1750	7023	5469	7689	9724	4837.06
CAR 18:0	0.00164724	0.0207756	18	6	3793.45	0.712193	1	20	6	16497	0.00908967	0.0654048	19	6.01667	13374.4	2978.87	0.222729	12455	10934	12075	11733	22197	12515	15459	15817	5370	4731	10652	7573	14324	10908	21880	19592	13013.4
CL 70:7|CL 16:1_18:2_18:2_18:2	0.00164724	0.0207756	24	15	22920.9	0.0685565	0.898568	20.7529	12	83358.8	0.00113931	0.0220496	22.3765	13.462	51418.5	39018.4	0.75884	31712	19128	36464	28350	65368	26422	34241	39762	69235	70089	111231	82880	49691	29643	67252	46456	50495.2
CL 72:9|CL 18:2_18:2_18:2_18:3	0.00164724	0.0207756	24	15	938.684	0.141546	1	23.7736	12	3494.75	0.00218327	0.0307094	23.8868	13.4932	2050.79	1781.3	0.868593	609	591	690	683	2899	1180	1657	1958	2163	2222	5802	3792	1913	1569	3086	1942	2047.25
Cer 35:1;2O|Cer 14:1;2O/21:0	0.00164724	0.0207756	18	6	1465.3	0.473529	1	20	6	7384.75	0.00636197	0.0540494	19	6.01667	6018.07	1242.55	0.206471	5653	5098	5976	5498	10525	5507	7047	6460	3363	3446	3227	3347	7226	6075	8920	6512	5867.5
Cer 36:1;2O|Cer 14:1;2O/22:0	0.00164724	0.0207756	18	6	10377.9	0.479148	1	20	6	36606.8	0.00642814	0.0540494	19	6.01667	27574.3	8471.12	0.30721	27618	19336	26369	21359	56737	26674	31287	31729	10861	10623	10291	9272	38919	30257	38772	34661	26547.8
FA 19:1	0.00164724	0.0207756	18	3	117.38	0.183969	1	25.4179	6.63e-05	1246.25	0.00275817	0.0344006	21.7089	1.80911	1170.24	357.647	0.305618	1199	1187	1129	1470	1156	729	1168	986	1062	861	1025	901	1494	1179	1558	1918	1188.88
LPC 18:3	0.00164724	0.0207756	24	9	16201.9	0.14293	1	24.7059	6	30127.5	0.00220232	0.0307094	24.3529	7.52332	18077.4	15340.4	0.848598	26497	5376	4601	17187	39312	9686	43340	28172	41364	26184	21468	19254	2601	2778	1973	3154	18309.2
PC P-34:1 or PC O-34:2	0.00164724	0.0207756	18	15	3771.53	0.238245	1	20	12	19946.2	0.00347046	0.0391516	19	13.6167	10596.8	9226.06	0.870647	7785	7722	10159	7986	8447	5853	6475	4533	13986	11079	33677	21043	7402	5152	9295	7525	10507.4
PE 38:2|PE 20:0_18:2	0.00164724	0.0207756	18	6	20926.1	0.855501	1	20	6	78596.2	0.0106603	0.0714427	19	6.01667	64272.2	15301.1	0.238066	52570	44668	52538	52586	108316	58972	65917	81180	21997	30120	42055	29354	89736	70247	107265	91168	62418.1
PE-Cer 34:0;2O|PE-Cer 14:0;2O/20:0	0.00164724	0.0207756	18	6	8143.4	0.375172	1	20	6	33260	0.00518441	0.0499528	19	6.01667	25654.2	6788.09	0.2646	21842	23275	26534	23047	50459	23326	28211	31044	10342	11290	14189	10951	29390	25095	35796	32515	24831.6
PEtOH 36:1|PEtOH 18:0_18:1	0.00164724	0.0207756	18	15	12426.7	0.0255575	0.898568	20	12	65454.5	0.000466271	0.0156236	19	13.6167	31660.7	32146.7	1.01535	22478	21757	25590	21526	22761	14079	17700	19117	67035	67497	71770	55516	18496	14172	21620	20476	31349.4
PG 36:4|PG 18:2_18:2	0.00164724	0.0207756	24	15	1130.49	0.200074	1	20	12	5462.5	0.00297197	0.0360895	22	13.475	3028.6	3041.13	1.00414	1512	1402	2198	1425	3292	1616	1426	2028	2942	3945	9520	5443	2381	1815	3812	2392	2946.81
unknown1071	0.00164724	0.0207756	18	15	15638.7	0.0786811	0.898568	20	12	57319.2	0.00128972	0.0233501	19	13.6167	25778	31163.8	1.20893	21360	13657	23277	16095	12551	5239	16935	11217	47975	65331	81897	34074	14790	10879	17028	15314	25476.2
unknown1075	0.00164724	0.0207756	18	9	1209.86	0.0731641	0.898568	24.7059	12	6765.25	0.00120805	0.0224137	21.3529	10.5239	6017.48	1096.02	0.182139	4293	4962	4312	5131	6499	7301	6202	6618	6245	6611	6078	8127	4785	5755	5182	6237	5896.12
unknown1100	0.00164724	0.0207756	18	15	959.19	0.267684	1	20	12	4879.25	0.00384791	0.040634	19	13.6167	3487.12	1600.03	0.458839	3453	3398	4102	3356	3607	1901	2790	2582	4801	5178	5098	4440	2664	2274	3288	2614	3471.62
unknown121	0.00164724	0.0207756	18	3	21142.8	0.182983	1	20	5.04e-05	60945.9	0.00274501	0.0344006	19	1.58336	41013.4	30709.7	0.748774	43255	57512	85799	57218	55875	30855	26827	33366	501	3919	40066	22032	62432	38577	89686	91625	46221.6
unknown1230	0.00164724	0.0207756	18	15	29471.9	0.102661	0.931236	20	12	139563	0.0016378	0.0270357	19	13.6167	88408.1	53984.8	0.610632	81618	77386	97288	80393	88005	44244	62919	62854	136992	138204	156832	126224	62346	51403	75792	63664	87885.2
unknown1250	0.00164724	0.0207756	18	12	3281.86	0.455718	1	20	12	9898.5	0.00615145	0.0533205	19	12.0333	5810.22	5293.56	0.911078	9088	3613	3213	6121	3682	2723	8931	5388	11355	9491	10526	8222	65	165	0	375	5184.88
unknown1254	0.00164724	0.0207756	24	0	1580.03	0.0677348	0.898568	20	5.03e-05	7104.75	0.001127	0.0220011	22	2.76e-05	5425.46	1892.19	0.348761	7260	6582	7439	7138	10374	4735	5903	5773	2878	2720	2444	2449	6317	4657	6396	6116	5573.81
unknown1262	0.00164724	0.0207756	18	15	1752.21	0.404965	1	20	12	6541	0.00554514	0.0512298	19	13.6167	4242.84	2739.66	0.645714	4157	3730	5610	4890	3981	2180	2882	2750	6303	6450	8042	5369	2761	2412	3337	2607	4216.31
unknown1311	0.00164724	0.0207756	18	6	1624.93	0.524503	1	20	6	6057.5	0.00695848	0.0572227	19	6.01667	4326.77	1901.78	0.439538	3422	2418	2557	3198	6736	4403	6932	6159	3456	3600	1968	2414	3747	4590	5179	4762	4096.31
unknown1362	0.00164724	0.0207756	18	3	3589.27	0.165247	1	25.2722	6.63e-05	22490.7	0.00250669	0.032529	21.6361	1.80304	20435.2	9369.6	0.458502	23110	16423	22163	28267	21213	9716	20315	17810	15688	10919	18362	13571	29759	24569	27981	35278	20946.5
unknown1515	0.00164724	0.0207756	18	15	2156.32	0.876264	1	20	12	5862	0.0108844	0.0722152	19	13.6167	3152.34	3533.45	1.12089	7562	2275	3019	3096	1354	1196	1425	1179	4724	4237	10285	4202	1184	963	1830	1359	3118.12
unknown166	0.00164724	0.0207756	24	0	16726.4	0.081694	0.898568	20	8.13e-05	39063.6	0.00133405	0.0237595	22	4.47e-05	25950.4	18656.3	0.718923	33845	32323	50671	39416	37330	18916	20436	19841	2937	3624	16022	9958	33398	22053	47217	50622	27413.1
unknown32	0.00164724	0.0207756	18	6	2321.79	0.407028	1	20	6	6868.25	0.00556997	0.0512483	19	6.01667	5175.13	1544.19	0.298387	5451	3345	5203	4270	9991	5530	6603	5349	1534	1457	2221	1776	6376	4978	8257	7467	4988
unknown346	0.00164724	0.0207756	24	0	3347.97	0.0190759	0.898568	20	6.63e-05	21200.2	0.000357211	0.0135922	22	3.65e-05	17117.7	5313.61	0.310417	20876	19934	21228	22763	20230	18747	18940	18236	7830	8625	13230	11923	17979	18352	20630	21025	17534.2
unknown515	0.00164724	0.0207756	18	6	3043.74	0.934148	1	20	6	9112.25	0.011505	0.0737964	19	6.01667	7335.88	1975.92	0.26935	4957	4386	5602	5829	13108	6959	7723	8659	1401	2059	2289	2754	9855	6398	16543	15021	7096.44
unknown544	0.00164724	0.0207756	18	15	963.079	0.327808	1	20	12	4779.25	0.00460277	0.0461305	19	13.6167	3068.85	1849.54	0.602683	3412	2485	2601	2976	2554	1475	2269	2021	3887	3038	7283	4909	2850	1546	2764	2745	3050.94
unknown563	0.00164724	0.0207756	18	15	1957.27	0.133661	1	20	12	8593.5	0.00207427	0.0299669	19	13.6167	5368.16	3436.51	0.640166	5796	4119	5856	4518	3840	2316	5491	3306	7637	9083	10214	7440	4060	2806	4660	4216	5334.88
unknown629	0.00164724	0.0207756	18	15	1731.35	0.123844	1	20	12	7106.5	0.00193747	0.0288055	19	13.6167	3892.65	3300.16	0.847793	3812	2392	3594	3900	3404	1729	2450	2034	5981	5337	9864	7244	2135	1776	3096	3023	3860.69
unknown646	0.00164724	0.0207756	18	3	1022.48	0.121996	1	20	6.7e-05	2846.24	0.00191158	0.0287861	19	1.58337	1740.23	1553.47	0.89268	1559	3340	4478	2008	2393	1715	914	1355	142	150	977	552	2748	2107	3677	3944	2003.69
unknown651	0.00164724	0.0207756	18	12	5938.64	0.426866	1	20	12	19868.2	0.00580799	0.0523652	19	12.0333	11815.3	10226.3	0.865515	17196	8431	6270	11295	7994	6471	16424	10779	26845	18757	20114	13757	1222	1036	811	2314	10607.2
unknown955	0.00164724	0.0207756	18	3	950.352	0.192665	1	23.52	6.63e-05	2646.74	0.00287389	0.0354499	20.76	1.73003	1779.23	1739.6	0.977727	1573	2787	4031	2196	2360	1274	815	973	85	192	733	1053	2970	1256	4530	4087	1932.19
unknown993	0.00164724	0.0207756	18	15	16334.5	0.132993	1	20	12	56072.5	0.002065	0.0299669	19	13.6167	20686.3	32924.8	1.59162	9071	8184	13010	10407	10717	5436	7707	5452	35867	31177	102583	54663	6808	6669	10371	7757	20367.4
unknown1067	0.00215962	0.0266606	24	0	496.566	0.0651758	0.898568	27.1385	6.63e-05	3506.99	0.00138904	0.0241736	25.5692	3.12e-05	2467.63	773.237	0.313352	4446	2989	3096	3497	2357	1961	2273	1998	1609	2070	1991	1794	2070	1882	2553	2369	2434.69
Cer 28:2;2O|Cer 16:2;2O/12:0	0.00267199	0.0266606	18	15	385.904	0.0985188	0.922865	20	12	1399.75	0.002433	0.0322198	19	13.6167	732.563	671.209	0.916248	509	400	587	854	538	322	409	353	1328	1115	2061	1095	728	414	490	414	726.062
HexCer 34:0;2O	0.00267199	0.0266606	18	6	682.535	0.162367	1	20	6	2899.5	0.00379301	0.040634	19	6.01667	2178.63	610.724	0.280324	2198	1838	2351	2166	3995	1937	2768	2898	1108	1147	1069	920	1891	1916	2875	2597	2104.62
HexCer 37:2;3O|HexCer 16:1;2O/21:1;O	0.00267199	0.0266606	18	15	6632.31	0.134016	1	20	12	30916	0.00319943	0.0378318	19	13.6167	15564.4	14817.5	0.952013	11490	9086	14413	11442	10968	6285	10332	8509	23666	19468	49437	31093	8910	6611	13545	11479	15420.9
LPC 17:1	0.00267199	0.0266606	18	12	4153.55	0.421232	1	24.5682	12	15619.5	0.00876732	0.0642412	21.2841	12.2927	9265.67	9129.23	0.985275	14526	2324	1882	9133	10047	2718	18871	11556	23877	17008	12579	9014	1210	1187	796	1150	8617.38
LPE 18:1	0.00267199	0.0266606	18	12	127259	0.494648	1	20	12	437238	0.010083	0.0698022	19	12.0333	255232	230847	0.904461	385010	171238	133973	248945	155069	128696	369785	228462	625194	422645	416226	284887	14463	16871	7663	38253	227961
PI 34:4|PI 16:1_18:3	0.00267199	0.0266606	24	15	4213.65	0.0757258	0.898568	20	12	18592.2	0.00192335	0.0287861	22	13.475	10500.4	10099.3	0.961795	5750	4918	6174	5940	11261	5383	6678	8106	12682	13806	27135	20746	8363	5308	12088	9323	10228.8
unknown1035	0.00267199	0.0266606	18	15	1499.77	0.0471096	0.898568	20	12	7834.5	0.00125628	0.0229296	19	13.6167	4756.71	3022.97	0.635517	4468	3783	4327	3966	4245	2690	3688	3395	8006	7398	8949	6985	3584	2603	3942	3610	4727.44
unknown1065	0.00267199	0.0266606	18	12	13681.8	0.477432	1	20	12	39745.8	0.00977727	0.06838	19	12.0333	21109.2	22879.9	1.08388	27986	945	795	13148	12089	2959	52563	24939	70780	48701	22828	16674	0	0	95	0	18406.4
unknown1105	0.00267199	0.0266606	24	0	1311.68	0.0994803	0.922865	24.2975	6.63e-05	3724.49	0.00245416	0.0322198	24.1488	3.3e-05	2425.74	1588.88	0.655008	4209	2257	3807	4625	3050	1614	1576	1294	732	1251	1342	1453	2951	1445	3869	3215	2418.12
unknown1107	0.00267199	0.0266606	18	6	4035.28	0.961406	1	20	6	14768	0.0178904	0.0982097	19	6.01667	11102.8	4259.18	0.383612	7192	5725	7612	7564	18512	11402	13819	15339	6027	6942	6861	6064	11775	12101	16494	15958	10586.7
unknown1180	0.00267199	0.0266606	18	15	2138.64	0.0722901	0.898568	20	12	9174.5	0.00184505	0.0283708	19	13.6167	5301.55	3871.16	0.730194	3614	4891	4910	4049	3883	2583	3400	3583	6666	7938	12556	9538	3684	3287	4962	4681	5264.06
unknown1223	0.00267199	0.0266606	18	15	1813.91	0.228953	1	20	12	6205.75	0.00513829	0.0499189	19	13.6167	3463.59	3003.69	0.867219	3866	2352	4446	2703	1663	1281	2633	2447	5345	6481	8751	4246	1977	1476	2807	2478	3434.5
unknown1296	0.00267199	0.0266606	24	21	468.105	0.108728	0.959285	24.1644	17.9999	2428.75	0.00265647	0.0336936	24.0822	19.5053	1929.48	546.648	0.283314	2039	1896	2233	2398	1779	970	1272	1751	1767	1726	1970	1325	2783	2832	1924	2176	1927.56
unknown1325	0.00267199	0.0266606	18	6	5040.96	0.161944	1	20	6	17743.8	0.00378428	0.040634	19	6.01667	13375	3772.94	0.282088	12899	10710	14685	12890	23135	12846	16015	18979	5967	7162	6235	4967	11809	13942	17972	16472	12917.8
unknown1330	0.00267199	0.0266606	18	6	2339.46	0.500077	1	20	6	9860.75	0.0101791	0.0698839	19	6.01667	7667.94	2009.44	0.262057	6765	5766	7768	7143	14143	6088	9087	10125	2938	3360	4032	2912	7928	7738	12437	10561	7424.44
unknown1364	0.00267199	0.0266606	18	12	22593.8	0.44813	1	20	12	56587	0.00925304	0.0663676	19	12.0333	28372.4	33247.5	1.17182	45612	12139	7173	21787	8653	6886	43895	17722	92036	56366	50110	27836	124	68	72	638	24444.8
unknown1437	0.00267199	0.0266606	18	3	329.865	0.123436	1	25.2722	17.9999	6777.72	0.00297397	0.0360895	21.6361	20.3261	3100.51	2694.19	0.86895	2674	1890	2795	8657	1932	1167	1343	1122	853	1077	2072	1604	5463	5022	7801	8825	3393.56
unknown1506	0.00267199	0.0266606	18	12	1007.27	0.238611	1	24.1644	12	9199.75	0.00532869	0.0504773	21.0822	12.2621	7559.03	2369.47	0.313462	5873	5328	6992	8401	8430	8030	8635	7591	11725	7089	9269	8716	7216	4652	4496	5616	7378.69
unknown1564	0.00267199	0.0266606	18	12	4244.05	0.438934	1	20	12	10908.2	0.00908748	0.0654048	19	12.0333	5174.34	6586.58	1.27293	7911	1615	955	3420	1333	764	7836	2766	19616	10686	8740	4591	0	49	58	0	4396.25
unknown1638	0.00267199	0.0266606	18	6	2806.86	0.2864	1	20	6.00002	10779.2	0.00625623	0.0536078	19	6.01667	8844.4	1576.92	0.178296	6744	7499	10363	10404	10472	9150	11510	11985	4226	2303	6585	5222	10548	8532	8958	13952	8653.31
unknown1654	0.00267199	0.0266606	24	18	1160.36	0.159064	1	27.3065	17.9999	3950.24	0.00372461	0.04042	25.6533	18.075	2314.22	1186.37	0.512645	1649	86	1280	3671	993	1013	1547	1045	1913	2176	2154	2836	3570	2259	5049	4923	2260.25
unknown183	0.00267199	0.0266606	18	3	4465.2	0.0877961	0.898568	20	6.43e-05	14974	0.00219522	0.0307094	19	1.58336	11150.2	5840.39	0.523792	11603	16345	18488	13460	14652	12210	8603	11112	3768	3498	8809	7352	14149	13171	18372	18659	12140.7
unknown253	0.00267199	0.0266606	18	6	3988.44	0.929807	1	20	6	14102	0.0173854	0.0963708	19	6.01667	11873.9	2425.75	0.204293	9814	7971	9706	9968	19229	11956	11954	13269	3551	3553	8451	5640	14640	10616	23785	21176	11579.9
unknown372	0.00267199	0.0266606	18	6	1345.62	0.899881	1	20	6	5432	0.0169045	0.0942545	19	6.01667	4149.3	1333.62	0.321408	3935	2697	3002	3173	8364	3663	5049	4652	2005	1527	2310	2532	5100	3059	6051	6684	3987.69
unknown485	0.00267199	0.0266606	18	12	5950.3	0.409274	1	26.9725	12	23861.2	0.00854992	0.0633751	22.4862	12.4975	14728.3	13558.3	0.920557	23264	12132	10736	17174	12261	9302	22398	17124	26656	23097	26174	19518	1493	1639	989	3132	14193.1
unknown488	0.00267199	0.0266606	18	15	929.315	0.257259	1	20	12	5413.75	0.00569341	0.0519582	19	13.6167	3335.57	2066.45	0.619517	3226	2769	2501	3058	2923	1805	2691	2135	4591	3331	8513	5220	2159	2267	2872	2988	3315.56
unknown52	0.00267199	0.0266606	18	6	31808.7	0.945023	1	20	6	109256	0.0176289	0.0972405	19	6.01667	92068.7	19308.8	0.209722	76653	57418	74576	69995	151925	89956	93558	101585	19213	23342	62538	36259	115718	83600	203248	176078	89728.9
unknown529	0.00267199	0.0266606	18	12	35268.5	0.261197	1	25.5652	12	145971	0.00576997	0.0522487	21.7826	12.3731	89783.6	87947.5	0.979549	147467	26504	23336	105022	108555	43165	173220	124998	190644	154705	138739	99795	5127	5549	2216	5733	84673.4
unknown574	0.00267199	0.0266606	18	3	1133.14	0.103286	0.931236	20	7.15e-05	4590.99	0.00253769	0.0325549	19	1.58337	3399.18	1523.92	0.448321	3924	5376	5359	3705	4301	3069	2737	3138	1501	1575	3032	2265	4036	3516	5361	5627	3657.62
unknown725	0.00267199	0.0266606	18	6	3272.84	0.454872	1	20	6	10985.2	0.0093741	0.0668091	19	6.01667	8360.69	2427.22	0.290314	8038	5879	8754	6612	15954	8361	9962	9664	3259	2889	2992	3542	10050	7636	13181	12292	8066.56
unknown795	0.00267199	0.0266606	24	0	813.526	0.0663008	0.898568	25.4179	6.63e-05	3648.24	0.00170751	0.0271869	24.7089	3.22e-05	2676.53	972.932	0.363505	3831	3138	3688	3936	2407	2397	2108	2051	1601	1690	2783	1799	2318	2165	3380	3199	2655.69
unknown829	0.00267199	0.0266606	18	15	6200.09	0.0661383	0.898568	20	12	24016.5	0.00170376	0.0271869	19	13.6167	10453	12729.2	1.21776	7385	6027	6811	5665	6986	3709	5536	4147	20289	15819	37220	22738	5314	4475	7266	5888	10329.7
unknown865	0.00267199	0.0266606	24	3	1158.77	0.0929324	0.898568	22.7907	5.83e-05	4224.74	0.00230953	0.0313188	23.3953	1.46224	2824.67	1873.83	0.66338	4710	3101	4967	4121	4652	1901	2832	2712	1216	1047	1676	1082	2163	1825	3433	4126	2847.75
unknown866	0.00267199	0.0266606	18	12	31673.4	0.495524	1	20	12	112872	0.0100985	0.0698022	19	12.0333	67311.6	58553.9	0.869892	102798	45582	36695	66673	44169	33804	99433	62733	154199	107454	111167	78669	4433	5022	2929	10552	60394.5
unknown901	0.00267199	0.0266606	18	15	4059.68	0.103186	0.931236	20	12	16615.2	0.00253549	0.0325549	19	13.6167	7829.89	8455.67	1.07992	5227	5529	5947	5903	5166	3512	4153	4179	13777	10154	25902	16628	4117	2775	6524	4475	7748
unknown1110	0.00344533	0.0340739	18	6	1174.68	0.445956	1	20	6	3977.5	0.0114901	0.0737964	19	6.01667	3175.52	722.217	0.227433	3168	2210	3038	3093	5425	3168	3394	3923	931	1153	1488	1569	4080	2892	4646	5230	3088
unknown303	0.00344533	0.0340739	18	3	2031.87	0.215472	1	20	6.63e-05	8544.75	0.00609165	0.0533205	19	1.58336	7114.12	2732.28	0.384064	7100	8447	10087	8545	10087	7515	6435	7275	2020	2977	6737	6097	8701	8099	10674	10444	7577.5
CL 72:7|CL 18:1_18:2_18:2_18:2	0.00421867	0.034948	24	15	594.677	0.21658	1	23.6461	12	2927.5	0.00730764	0.0586766	23.8231	13.4896	1886.06	1312.91	0.696112	911	720	951	965	2734	1293	1646	1726	2063	1707	4619	3321	1697	1252	2764	1743	1882
Cer 36:4;4O|Cer 15:3;3O/21:1;(2OH)	0.00421867	0.034948	24	3	23412.3	0.0210503	0.898568	20	6.63e-05	73693.7	0.000917265	0.0195882	22	1.37504	54256	35296.6	0.650556	81342	65435	76249	71749	96488	56820	65993	69438	19616	19270	17081	16446	57134	49748	69832	65472	56132.1
Cer 38:0;2O	0.00421867	0.034948	18	6	4306.28	0.832279	1	20	6	13975.5	0.0233553	0.116042	19	6.01667	9986.44	4007.5	0.401294	10752	5278	8520	6140	23367	6973	13127	12435	4336	3725	5794	4086	11183	7190	15364	13743	9500.81
Cer d33:1	0.00421867	0.034948	24	3	1275.27	0.0227891	0.898568	20	6	4472.5	0.000985402	0.0198299	22	4.675	3375.43	1276.7	0.378234	4085	3741	4346	4134	5748	3827	4542	3773	1724	1597	1013	1493	3229	3115	4072	2941	3336.25
FA 18:1 (oleic acid)	0.00421867	0.034948	18	3	100492	0.179442	1	25.1282	6.63e-05	800750	0.00619695	0.0535083	21.5641	1.79704	741294	253380	0.341807	790726	671891	791820	948568	808288	432268	727836	678273	617739	468677	681392	557156	972089	868876	936497	1139917	755751
FA 20:0 (arachidic acid)	0.00421867	0.034948	18	6	55451.3	0.832618	1	20	5.99998	303856	0.0233634	0.116042	19	6.01666	242953	61569.9	0.253423	217254	192241	201822	208379	438053	199649	280322	297398	141833	139267	169247	151745	268285	195933	362694	303750	235492
LPG 18:1	0.00421867	0.034948	18	12	1360.83	0.676846	1	20	12	6186.75	0.0195838	0.103938	19	12.0333	3115.31	3614	1.16008	4773	407	372	2071	2020	633	4994	2576	11641	9501	1291	2314	129	63	78	151	2688.38
LPS 18:1	0.00421867	0.034948	18	12	6741.38	0.148218	1	20	12	18758.2	0.00523819	0.050129	19	12.0333	9976.5	10370.2	1.03946	11793	547	2324	4514	11601	3969	16107	8602	27747	21434	10429	15423	1194	1102	826	2411	8751.44
PE 28:1|PE 12:0_16:1	0.00421867	0.034948	18	3	2253.02	0.231629	1	20	6.09e-05	7979.99	0.00774975	0.0610463	19	1.58336	6135.29	3463.92	0.56459	5325	8402	12487	5706	8647	5497	3830	6542	2057	2792	5161	2852	9732	8055	10510	9969	6722.75
PE 40:1|PE 22:0_18:1	0.00421867	0.034948	18	6	933.381	0.976314	1	20	5.99999	4893.75	0.0267398	0.126647	19	6.01666	3955.94	1009.4	0.255161	4032	2268	3129	3133	7283	3507	4042	4743	2310	2911	2783	1751	4293	3302	6329	5522	3833.62
PEtOH 36:4|PEtOH 18:2_18:2	0.00421867	0.034948	24	15	1073.03	0.0854564	0.898568	20.9501	12	4257	0.00321865	0.0378318	22.4751	13.4602	2722.42	1888.47	0.69367	1592	1766	1694	1334	3076	1261	1992	3104	3231	3573	5571	4653	2177	1812	3585	2454	2679.69
unknown1080	0.00421867	0.034948	24	15	1197.84	0.0470522	0.898568	20	12	16605.8	0.00189064	0.0286789	22	13.475	6335.54	13605.9	2.14754	2227	2068	1930	2045	2796	1976	3144	1631	13294	10585	26675	15869	2888	2735	2862	2789	5969.62
unknown1227	0.00421867	0.034948	24	15	1770.24	0.13787	1	24.5682	12	6605.75	0.00491456	0.0486044	24.2841	13.5194	4056.28	3043.13	0.750226	1427	1037	1724	1291	4784	2923	3553	3687	3677	4160	10134	8452	3630	2921	6174	5576	4071.88
unknown1235	0.00421867	0.034948	18	3	5420.5	0.148513	1	20	6.55e-05	14164.7	0.00524736	0.050129	19	1.58336	9610.85	7346.73	0.76442	7873	16312	20446	12028	12763	7785	5900	8295	0	125	8520	6411	15090	12978	20447	18736	10856.8
unknown132	0.00421867	0.034948	18	6	6293.07	0.0921185	0.898568	20	6	49865.2	0.0034404	0.0390085	19	6.01667	44890.8	3501.09	0.0779913	48836	42953	45123	49427	54521	46332	49749	48859	26916	31264	37909	39471	45407	44044	49582	51072	44466.6
unknown1367	0.00421867	0.034948	18	6	959.19	0.153025	1	20	6.00002	6753.75	0.00538747	0.0504773	19	6.01667	5985.65	611.397	0.102144	6049	6306	6294	5521	7606	6420	6086	6903	4416	5496	4008	4311	6478	7169	5919	5603	5911.56
unknown1398	0.00421867	0.034948	18	15	1899.11	0.740208	1	20	12	6519	0.0211377	0.109341	19	13.6167	3936.08	3216.01	0.817059	4740	3637	5881	3808	3411	947	2932	1996	5208	6304	9553	5011	1457	369	2922	4303	3904.94
unknown1514	0.00421867	0.034948	18	6	1364.36	0.21432	1	20	6	5929.5	0.00724085	0.0586766	19	6.01667	4256.84	1511.88	0.355166	3311	3710	4272	4552	8681	3712	5421	5904	2553	2597	1864	2895	3309	3086	4896	4415	4073.62
unknown1546	0.00421867	0.034948	18	12	3471.36	0.449133	1	26.9725	12	15339.5	0.0137723	0.0820126	22.4862	12.4975	9470.09	9314.63	0.983583	18560	4381	4771	12164	12157	4742	14381	12604	19067	19206	14632	8453	128	141	0	251	9102.38
unknown1647	0.00421867	0.034948	18	12	32497.9	0.429354	1	20	12	122406	0.0132473	0.0801624	19	12.0333	62886.5	70922.7	1.12779	80595	44325	33715	51046	24187	23252	76485	46083	180229	164440	84979	59977	409	577	83	1748	54508.1
unknown201	0.00421867	0.034948	18	3	1067.73	0.321605	1	20	8.14e-05	4587.49	0.0103149	0.0701266	19	1.58337	3774.25	1304.96	0.345754	5970	3268	4410	4702	4312	2664	3449	4284	2789	3054	2528	2435	5986	4467	6246	3365	3995.56
unknown218	0.00421867	0.034948	18	6	2814.82	0.493725	1	20	6	12968.8	0.0149425	0.0865917	19	6.01667	10753.3	2102.02	0.195476	11329	8473	9593	9912	15313	10726	13260	12576	6647	5913	8474	7894	10842	9040	14698	13288	10498.6
unknown270	0.00421867	0.034948	18	6	7706.23	0.612571	1	20	6	28382.5	0.0179819	0.0982687	19	6.01667	21697.8	6071.16	0.279805	21472	14834	21073	20100	42997	19783	25266	25484	6270	5608	12137	8201	22768	15505	37862	36034	20962.1
unknown312	0.00421867	0.034948	18	3	2567.5	0.346725	1	24.4321	6.63e-05	8576.23	0.0110106	0.0724889	21.2161	1.76803	6452.92	5820.15	0.90194	4674	8802	14288	6541	8351	4468	2229	3737	695	510	6330	2663	9457	5052	16735	15210	6858.88
unknown357	0.00421867	0.034948	18	3	1485.45	0.380926	1	20	6	9360.75	0.0119455	0.0759705	19	4.43333	8830.22	2495.46	0.282605	8778	8530	9547	9564	11471	8465	8478	9029	3650	4366	7936	6972	10563	8486	12107	12810	8797
unknown384	0.00421867	0.034948	18	6	3111.27	0.359428	1	20	6	13321.2	0.0113594	0.0737048	19	6.01667	10489	2576.68	0.245656	10762	8468	10039	9414	17690	10005	13230	12360	5273	4870	7493	5783	10243	9083	14819	13296	10176.8
unknown417	0.00421867	0.034948	18	12	2472.05	0.139748	1	25.4179	12	12908	0.00497354	0.048758	21.7089	12.3608	8542.44	7202.09	0.843095	12870	4010	4243	7494	14412	4360	14650	11151	15715	12520	12630	10767	1310	1331	1195	1103	8110.06
unknown503	0.00421867	0.034948	18	6	1882.67	0.970314	1	20	6	7203.25	0.0266007	0.126522	19	6.01667	6071.6	1295.88	0.213434	4537	3823	5562	4501	9807	6201	6093	6712	2131	2152	4427	3024	7655	5462	12032	10514	5914.56
unknown612	0.00421867	0.034948	18	3	1980.96	0.253525	1	20	6.63e-05	5352	0.00838576	0.0631746	19	1.58336	4388.96	2512.11	0.572371	5488	4903	6504	4513	6565	4391	3734	4829	1437	1552	3242	2121	5956	4461	8791	8553	4815
unknown627	0.00421867	0.034948	18	15	26860.7	0.349534	1	20	12	164309	0.0110878	0.0727843	19	13.6167	102757	63997.7	0.622809	98364	76984	104744	95088	100775	49885	72174	65550	131407	107383	257459	160986	71141	51371	103634	87244	102137
unknown668	0.00421867	0.034948	18	15	23364.2	0.722524	1	20	12	116423	0.0207064	0.107358	19	13.6167	79078	44461.4	0.562248	81628	63764	97718	88305	76325	40649	57983	48611	91225	82712	184095	107661	52286	39251	80211	65934	78647.4
unknown700	0.00421867	0.034948	18	3	13571.3	0.648727	1	20	5.99997	20520.5	0.0188864	0.101923	19	4.43332	19163.8	13369	0.697616	24786	11183	22539	23257	43649	8754	11157	18522	613	1104	3249	1753	24290	13379	52821	42717	18985.8
unknown808	0.00421867	0.034948	18	15	3248.8	0.106354	0.951253	20	12	11359.5	0.00390758	0.0409804	19	13.6167	5092.06	6079.14	1.19385	3284	2598	4313	3122	2699	1246	2570	2158	8808	10159	19141	7330	4123	1627	3901	3452	5033.19
unknown861	0.00421867	0.034948	24	12	816.178	0.0627099	0.898568	20	12	11481	0.00244379	0.0322198	22	12.1	4882.81	6526.03	1.33653	1814	2076	1781	2008	2920	2161	2188	2056	8449	6231	17776	13468	2407	1693	2753	2184	4497.81
unknown867	0.00421867	0.034948	18	15	8653.04	0.0876635	0.898568	20	12	29586	0.00329235	0.0384964	19	13.6167	11292.3	17083.8	1.51288	5538	4538	6723	6457	5147	2870	5380	3277	22023	17653	50127	28541	4830	3566	6905	4454	11126.8
PE P-38:2 or PE O-38:3	0.00536208	0.0440948	18	15	2923.53	0.0170637	0.898568	20	12	12902.5	0.000942344	0.0195882	19	13.6167	4066.71	8005.38	1.96851	1118	925	1299	1175	1225	711	1025	862	12978	12748	14986	10898	1052	818	1118	889	3989.19
unknown1390	0.00536208	0.0440948	18	15	4521.24	0.288818	1	20	12	12349.2	0.0115691	0.073996	19	13.6167	5601.1	7477.75	1.33505	6019	4172	5695	8111	3251	0	5692	1438	12472	10127	14448	12350	0	0	0	4684	5528.69
CAR 20:0	0.0065055	0.0441234	18	6	8828.94	0.990082	1	20	6	31783.2	0.0389362	0.161874	19	6.01667	24956.1	7657.62	0.306844	19511	15506	20146	16856	42355	23347	29389	32042	9470	7975	24792	15117	26677	20468	46658	34141	24028.1
CL 70:8|CL 16:1_18:2_18:2_18:3	0.0065055	0.0441234	24	15	1690.16	0.195617	1	24.9858	12	6168.25	0.00975652	0.06838	24.4929	13.5357	4107.56	2502.32	0.609197	1841	1592	1995	1921	5995	2794	3209	4016	4282	4076	9694	6621	4285	2731	6221	4808	4130.06
HexCer 34:1;2O	0.0065055	0.0441234	18	6	612.354	0.693896	1	20	5.99999	2691.75	0.0288929	0.133466	19	6.01666	2003.35	781.702	0.390197	1582	1034	1285	1531	3377	1884	2903	2603	1648	1721	1367	1222	1802	1908	2401	2270	1908.62
HexCer 36:2;2O	0.0065055	0.0441234	24	12	528.916	0.0590451	0.898568	20.5594	12	2305.5	0.00340503	0.0388052	22.2797	12.072	1598.55	737.229	0.461187	1152	859	1171	1084	2052	1075	1437	1405	2079	2475	2699	1969	1220	956	1717	1614	1560.25
LPC 20:2	0.0065055	0.0441234	18	12	1661.52	0.579722	1	26.0177	12	9182.5	0.0248168	0.120854	22.0088	12.4118	5728.36	5328.71	0.930233	11879	1584	1755	6123	7407	2029	10531	6885	14077	8634	8326	5693	409	674	372	830	5450.5
LPC P-16:0 or LPC O-16:1	0.0065055	0.0441234	18	12	1274.03	0.48955	1	25.1282	5.99999	7992.25	0.0214952	0.11035	21.5641	9.76252	5688.88	3273.9	0.575491	8977	1455	2631	4894	16928	3029	6253	5759	6341	5217	10912	7561	1424	1018	1176	1660	5327.19
LPE 14:0	0.0065055	0.0441234	18	12	1648.62	0.503217	1	20	12	7229.5	0.0220051	0.112022	19	12.0333	4346.66	3582.09	0.824101	5769	3397	2405	4168	4621	1735	4953	3388	9934	9257	5706	4021	1030	1059	497	836	3923.5
NAGly 14:0;O	0.0065055	0.0441234	24	18	1276.86	0.0786449	0.898568	28	17.9999	5652.98	0.00438867	0.0445817	26	18.1071	2747.79	1869.01	0.680188	2028	327	898	3452	1319	692	1846	869	1913	1622	2656	2141	6709	3047	6498	6358	2648.44
PC P-38:3 or PC O-38:4 Isomer A	0.0065055	0.0441234	24	12	1468.66	0.0538538	0.898568	20	12	21374.5	0.0031379	0.0374712	22	12.1	8738.06	12502.1	1.43077	2760	3184	3047	3375	4492	2926	4447	3522	15431	12763	33189	24115	3460	2695	4731	3871	8000.5
PE 26:0|PE 12:0_14:0	0.0065055	0.0441234	18	3	2139.35	0.0435445	0.898568	20	6.63e-05	5242.74	0.0025974	0.0331316	19	1.58336	3630.25	2370.35	0.652944	4522	5577	6573	4299	5811	3521	2928	4328	1033	1506	1487	1232	5547	4713	6041	5398	4032.25
PE 26:1|PE 12:0_14:1	0.0065055	0.0441234	18	3	831.027	0.33257	1	20	6	2243.25	0.015439	0.0888732	19	4.43333	1994.97	1035.54	0.519075	1583	2140	2822	1612	3005	1846	1504	2618	531	729	1149	656	2888	2289	2881	3446	1981.19
PE 35:1|PE 19:0_16:1	0.0065055	0.0441234	18	3	3984.55	0.0747663	0.898568	20	6.63e-05	10960.2	0.00419683	0.0434188	19	1.58336	8022.17	4414.34	0.550267	10749	9612	12702	10778	12109	7097	7550	9328	2385	3248	5422	3754	10471	7925	14577	12626	8770.81
PE P-36:2 or PE O-36:3	0.0065055	0.0441234	18	15	9991.6	0.058483	0.898568	20	12	30413.8	0.00337626	0.0388052	19	13.6167	11913.2	17225.7	1.44593	6763	4857	7576	6165	6255	3535	4701	4750	23193	21111	47586	29765	4648	3414	7521	6102	11746.4
PE-Cer 34:2;3O|PE-Cer 18:2;2O/16:0;O	0.0065055	0.0441234	18	15	31643.7	0.136328	1	20	12	184983	0.0071197	0.0579121	19	13.6167	129317	57748.2	0.446564	128234	115056	127419	124508	131764	80909	95462	111741	179177	179377	215662	165715	100082	77266	119569	108182	128758
PE-Cer 36:0;2O|PE-Cer 21:0;2O/15:0	0.0065055	0.0441234	18	6	6032.86	0.353272	1	20	6	21571	0.0162613	0.0921882	19	6.01667	16327	4482.11	0.274521	15766	14104	17569	14587	33610	14788	15809	22077	5228	6206	6996	4637	20264	13848	25178	21875	15783.9
PEtOH 32:2|PEtOH 16:1_16:1	0.0065055	0.0441234	18	15	1041.57	0.690669	1	20	12	6186.5	0.0287795	0.133216	19	13.6167	4246.52	2403.01	0.565877	4201	4967	4597	3893	3775	1640	2133	3471	4745	5252	10106	4643	3300	1790	4785	4274	4223.25
PI 32:2|PI 16:1_16:1	0.0065055	0.0441234	18	15	16638.2	0.214118	1	20	12	83968.5	0.0105534	0.0711483	19	13.6167	49232.3	35909.9	0.729398	44078	36583	48225	44483	46473	23837	24677	31089	61095	65556	130692	78531	37348	23626	46838	39021	48884.5
PI 36:4	0.0065055	0.0441234	24	15	22723.1	0.113862	0.975652	20.7529	12	100943	0.00607982	0.0533205	22.3765	13.462	66806.3	41729.3	0.624631	42423	35800	49665	43666	81523	40375	44708	57359	78375	76908	134858	113630	65020	43693	87356	57744	65818.9
unknown1019	0.0065055	0.0441234	18	15	13992.6	0.0553292	0.898568	20	12	50830.8	0.00321414	0.0378318	19	13.6167	21299.6	27559.9	1.29391	13768	11125	13173	12305	13508	7238	10545	8743	44156	34633	77087	47447	10180	7507	13499	11610	21032.8
unknown1090	0.0065055	0.0441234	18	12	1001.79	0.241579	1	25.7143	12	5292.5	0.0117172	0.0747307	21.8571	12.3857	3571.04	2746.96	0.769231	4903	4010	1051	2784	5828	1993	5831	3671	6681	4280	5671	4538	558	718	1049	1103	3416.81
unknown1125	0.0065055	0.0441234	18	3	8485.46	0.155704	1	20	4.95e-05	24400.7	0.00799701	0.062555	19	1.58336	19820.6	8676.15	0.437733	24352	19508	28660	25083	31526	18833	18834	23401	6364	12369	13855	10819	24538	20093	33411	29027	21292.1
unknown1138	0.0065055	0.0441234	24	15	3260.82	0.082476	0.898568	20	12	111715	0.00457694	0.0460773	22	13.475	35564.3	101818	2.86294	5072	5923	6288	5407	9129	6627	8310	3710	82102	61739	205155	97864	6745	6983	8632	5529	32825.9
unknown1143	0.0065055	0.0441234	18	15	2001.11	0.168818	1	20	12	8361.25	0.00858175	0.0633751	19	13.6167	3416.11	4684.2	1.37121	2861	1294	1968	2171	2489	892	1428	1078	7498	4217	15182	6548	1292	994	2537	1483	3370.75
unknown1144	0.0065055	0.0441234	18	3	840.043	0.231217	1	24.1644	6.63e-05	2891.24	0.0112806	0.073447	21.0822	1.75688	2070.44	2054.92	0.992503	1237	3864	4980	1484	2383	1701	684	1243	280	146	1211	980	3480	2285	4917	4715	2224.38
unknown1161	0.0065055	0.0441234	24	15	1479.62	0.0575732	0.898568	20	12	7575	0.00332961	0.0387304	22	13.475	3896.27	4711.21	1.20916	2232	1570	1734	2312	3465	1998	3221	2103	6941	4851	11494	7014	2589	1830	3947	3012	3769.56
unknown1193	0.0065055	0.0441234	18	12	17545.8	0.714878	1	20	12	44975.2	0.029628	0.135193	19	12.0333	24705.8	25226.3	1.02107	47085	8713	4850	23954	9070	6051	45794	21873	71815	52204	34687	21195	148	86	0	87	21725.8
unknown1203	0.0065055	0.0441234	18	15	35866.2	0.295745	1	20	12	237594	0.0139552	0.0822297	19	13.6167	175330	66774.6	0.38085	193718	164602	176400	168602	177026	116255	145214	161264	257714	272963	224558	195140	133177	125903	149195	133208	174684
unknown1247	0.0065055	0.0441234	18	12	1917.67	0.679518	1	24.9858	6	8829.75	0.0283868	0.13167	21.4929	9.74492	5623.74	4169.91	0.741483	9711	875	1768	3844	23542	1486	5734	4557	7766	4148	12261	6606	0	0	0	92	5149.38
unknown1281	0.0065055	0.0441234	18	3	332.34	0.315381	1	27.3065	6.67e-05	1541.5	0.0147499	0.0860092	22.6533	1.8878	1767.74	1850.61	1.04688	1985	640	1138	2403	1649	781	1209	1001	558	709	1019	969	2660	1749	5239	5302	1813.19
unknown1292	0.0065055	0.0441234	24	15	1212.86	0.19485	1	20.0911	12	6532	0.00972328	0.06838	22.0456	13.4729	4300.62	2731.02	0.63503	2347	2207	4902	2476	3686	2757	2729	3451	3932	4728	9210	8258	3948	3624	5135	4259	4228.06
unknown13	0.0065055	0.0441234	18	6	26869.7	0.551701	1	20	6	114270	0.0237951	0.116638	19	6.01667	92420	18888.3	0.204375	97775	71394	94116	87251	164760	83312	107810	101200	36136	30768	66231	44955	96905	71688	150286	137510	90131.1
unknown1351	0.0065055	0.0441234	18	15	1817.09	0.164272	1	20	12	7842.75	0.00837981	0.0631746	19	13.6167	4563.32	3343.66	0.732726	4464	3423	4509	3872	3602	2789	3190	2770	6363	6922	11244	6842	2389	1623	4743	3750	4530.94
unknown1380	0.0065055	0.0441234	18	15	2512.7	0.153553	1	20	12	9467	0.00790044	0.0620157	19	13.6167	5023.72	4481.77	0.892122	4679	2958	5914	3777	4581	2338	3235	2383	8451	8358	13997	7062	3086	2010	3446	3410	4980.31
unknown1406	0.0065055	0.0441234	18	15	1587.99	0.162961	1	20	12	4854.5	0.00832143	0.0631746	19	13.6167	2302.89	2783.44	1.20867	2450	1554	2481	2850	1713	584	1566	723	5094	4201	5563	4560	505	449	908	1214	2275.94
unknown1465	0.0065055	0.0441234	18	9	4634.02	0.86724	1	20	6	20564	0.0348526	0.150759	19	7.6	14814.1	5105.84	0.344661	7682	7506	8252	8113	33699	12486	17542	18529	10023	11510	14736	13972	10620	10563	21855	13878	13810.4
unknown1469	0.0065055	0.0441234	18	12	10496.3	0.549635	1	20	12	49900	0.0237195	0.116521	19	12.0333	29590.4	25623.6	0.865942	39632	24282	19781	29369	19542	15867	35920	26509	70431	61894	37571	29704	3597	4503	1708	4705	26563.4
unknown1482	0.0065055	0.0441234	18	12	145322	0.501715	1	20	12	750335	0.0219492	0.111991	19	12.0333	454202	381772	0.840535	584711	380952	336373	454428	336139	269606	552432	433138	987951	946238	578875	488276	41613	50606	15905	88386	409102
unknown1555	0.0065055	0.0441234	18	15	6459.42	0.0178698	0.898568	20	12	26010	0.00116946	0.0224137	19	13.6167	8258.69	16088.9	1.94812	2633	2060	2396	2472	2960	1295	1980	1890	25582	24925	31230	22303	2192	1619	2319	1790	8102.88
unknown1598	0.0065055	0.0441234	24	18	9017.38	0.0899629	0.898568	28	17.9999	36416.4	0.00494157	0.0486571	26	18.1071	18889.2	10567.5	0.559444	13147	4864	6994	20513	11357	4926	13684	7244	16200	14233	20066	14346	47034	19388	46048	33196	18327.5
unknown1630	0.0065055	0.0441234	24	21	5089.22	0.131827	1	26.0177	17.9999	20473.4	0.00691342	0.0570611	25.0088	19.5924	12145.3	6321.55	0.520491	8956	7711	10185	18305	11227	5467	4633	3650	5985	8212	13932	10027	28179	12826	22488	18401	11886.5
unknown223	0.0065055	0.0441234	18	3	1919.44	0.508832	1	20	6.63e-05	6006.24	0.0222139	0.11232	19	1.58336	4968.29	2936.21	0.590991	3979	6707	8498	4841	7552	4578	2882	4445	991	1129	4385	4017	7275	4873	10688	10620	5466.25
unknown3	0.0065055	0.0441234	18	6	25441.2	0.831062	1	20	6	117806	0.0336291	0.147168	19	6.01667	99219.6	17498.6	0.176362	101912	71570	98049	90426	159313	90822	113506	107585	47641	43451	88190	63510	104057	75263	154497	143794	97099.1
unknown309	0.0065055	0.0441234	18	15	1222.94	0.262061	1	20	12	6464.75	0.012572	0.0775386	19	13.6167	4619.36	2012.24	0.435609	3595	4091	5580	4105	3835	3062	3018	3829	5193	4776	8631	7259	4073	3101	4576	4874	4599.88
unknown461	0.0065055	0.0441234	18	3	942.75	0.135327	1	23.9024	6.63e-05	4704.99	0.0070739	0.0579121	20.9512	1.74596	3839.77	1653.09	0.430517	5453	3201	4912	5254	4330	2230	3310	3306	2999	2256	3200	2293	5845	4424	6375	4167	3972.19
unknown533	0.0065055	0.0441234	18	12	9633.45	0.589894	1	25.8651	12	44098.2	0.0251855	0.12212	21.9326	12.3986	27527.8	24667.8	0.896105	44676	13086	10150	34748	24327	13823	51888	32564	70055	45610	32843	27885	4086	4549	2371	6408	26191.8
unknown537	0.0065055	0.0441234	18	6	1256.53	0.255387	1	20	5.99999	6969	0.0122946	0.0767161	19	6.01666	5904.17	1008.68	0.170842	6753	4499	5001	5994	7563	5910	6768	7635	4828	4217	5305	4925	5414	5679	6117	5903	5781.94
unknown647	0.0065055	0.0441234	18	12	24252.9	0.298665	1	25.7143	6.00003	144868	0.0140739	0.0824959	21.8571	9.83573	104650	63818.2	0.609823	165010	43035	63572	98048	279892	55474	126476	117629	135802	103389	199312	138945	12535	11489	6793	18028	98464.3
unknown724	0.0065055	0.0441234	18	12	1966.11	0.0535636	0.898568	20	12	6977.25	0.00312288	0.0374712	19	12.0333	4709.11	2450.99	0.520478	4738	3365	3555	3997	3438	3119	4261	3617	7741	7347	6639	6182	3221	3139	3220	3134	4419.56
unknown734	0.0065055	0.0441234	18	12	3541.54	0.257208	1	26.0177	12	16608.5	0.0123704	0.0767172	22.0088	12.4118	11015	9199.31	0.835161	17880	6310	6646	10024	21868	5550	15559	11890	19086	13638	20493	13217	1498	1506	1143	2257	10535.3
unknown806	0.0065055	0.0441234	24	0	388.202	0.274775	1	20	4.72e-05	2357	0.0130972	0.0795919	22	2.6e-05	2039.09	460.413	0.225793	2744	1824	2547	2313	2259	1763	1782	2222	1431	1702	1461	1774	2519	1804	2904	2154	2075.19
unknown966	0.0065055	0.0441234	18	6	1000.56	0.902779	1	20	6	4617	0.036045	0.153576	19	6.01667	3758.24	859.676	0.228744	3606	2597	3248	3162	7314	3412	4368	3374	1675	1406	2446	1830	4608	2932	6415	6072	3654.06
unknown1303	0.00815751	0.0548312	24	3	35.7089	0.0803645	0.898568	28	6.63e-05	401.498	0.00546093	0.0507933	26	1.62503	133.533	28.1514	0.21082	478	565	250	313	77	37	37	75	22	56	34	54	35	31	34	30	133
unknown332	0.00815751	0.0548312	18	3	606.874	0.617759	1	20	6	3308.5	0.0317	0.141204	19	4.43333	3245.84	880.017	0.271121	3044	2955	3848	3195	4382	2875	2961	3016	1241	1283	2984	2955	3714	3753	4405	5135	3234.12
Cer 34:2;3O|Cer 14:2;2O/20:0;(2OH)	0.00980952	0.0573499	18	15	27015	0.363855	1	20	12	139872	0.0236834	0.116521	19	13.6167	98063.3	46542.6	0.474618	118756	85725	101853	99932	91172	60771	86065	82273	153694	154344	139327	112125	65604	62005	79991	68165	97612.6
Cer 34:2;3O|Cer 17:1;2O/17:1;(3OH)	0.00980952	0.0573499	18	15	18200.2	0.280556	1	20	12	107209	0.0189769	0.102011	19	13.6167	73608.5	34956.2	0.474893	82734	63950	75878	70381	75362	43162	62319	67539	113426	125366	105458	84586	48771	45544	57999	49844	73269.9
Cer d36:1	0.00980952	0.0573499	18	6	25590	0.920057	1	20	6	106017	0.051514	0.192428	19	6.01667	83346.1	23219	0.278585	82408	46364	70841	64792	171319	69198	101651	81899	33180	26325	47508	37805	102972	66250	150102	135905	80532.4
HexCer 35:2;3O|HexCer 16:1;2O/19:1;O	0.00980952	0.0573499	24	15	4753.53	0.0653931	0.898568	20	12	32422.8	0.00535743	0.0504773	22	13.475	16525	20790.2	1.25811	8584	7947	10133	9743	14233	8647	12814	9219	26877	20615	49386	32813	10243	6902	14402	12896	15965.9
LPC 14:0	0.00980952	0.0573499	18	12	4366.38	0.43181	1	26.1721	12	65708.5	0.0273812	0.127626	22.0861	12.4253	46757.6	34947.7	0.747422	90829	17872	17258	52837	93191	19596	80950	55397	97273	71738	55921	37902	8965	8311	5099	6968	45006.7
LPC 18:1	0.00980952	0.0573499	18	12	174430	0.429319	1	25.5652	12	852953	0.0272476	0.12744	21.7826	12.3731	544156	509819	0.936899	977062	237227	127262	465470	1236105	159166	872428	631009	1396581	951475	655644	408111	27461	30169	18450	38906	514533
PC O-38:2|PC O-20:1_18:1	0.00980952	0.0573499	18	15	1481.74	0.0185048	0.898568	20	12	5371.5	0.00174519	0.0275912	19	13.6167	1627.08	3389.66	2.08328	368	439	436	298	355	271	440	214	5101	5208	6633	4544	281	327	303	290	1594.25
PE 32:2|PE 16:1_16:1	0.00980952	0.0573499	18	3	49124.5	0.474009	1	24.5682	4.49e-05	231254	0.0296236	0.135193	21.2841	1.7737	194736	124853	0.641143	158375	239615	334885	192141	252543	153352	105230	147029	48488	45670	215383	132558	257036	163052	403484	401141	203124
unknown1082	0.00980952	0.0573499	18	15	3259.41	0.0531632	0.898568	20	12	9578.5	0.00446346	0.0451372	19	13.6167	3711.48	5451.06	1.4687	2234	1836	2156	1661	1722	1145	1878	1347	8128	6596	14780	8810	1311	1343	1874	1718	3658.69
unknown1121	0.00980952	0.0573499	18	15	4318.83	0.0563789	0.898568	20	12	13924.5	0.00470096	0.0469051	19	13.6167	5729.58	7532.78	1.31472	3206	3067	3007	3021	2880	2043	3182	2422	11479	9409	21903	12907	3502	2292	2909	3277	5656.62
unknown1208	0.00980952	0.0573499	18	12	3565.41	0.14746	1	20	12	9523	0.0109047	0.0722152	19	12.0333	5566.26	4405.04	0.791382	4173	2994	3860	6139	4429	1651	6443	3065	11283	8998	8656	9155	1067	1278	2500	5043	5045.88
unknown1248	0.00980952	0.0573499	24	9	8325.83	0.539319	1	25.8651	6	13292.2	0.0330223	0.145292	24.9326	7.56669	8085.96	6375.41	0.788455	20483	782	829	10468	13912	1745	23605	13907	20488	12580	8266	6292	0	95	0	0	8340.75
unknown1267	0.00980952	0.0573499	18	15	2467.45	0.110958	0.96926	20	12	9606	0.00851489	0.0633751	19	13.6167	3722.16	5444.24	1.46266	2045	1672	1469	1943	1303	1053	1738	1348	7334	4885	17210	8995	1695	1337	2114	2570	3669.44
unknown1321	0.00980952	0.0573499	18	15	12650.7	0.280933	1	20	12	89590.5	0.0189987	0.102011	19	13.6167	65112.8	25754.7	0.395539	72113	59662	65165	62084	65790	41782	54654	61122	95284	105298	82369	75411	47432	45249	55855	48545	64863.4
unknown1361	0.00980952	0.0573499	24	15	431.689	0.244338	1	20	12	2180.75	0.0168584	0.0942545	22	13.475	1291.99	1096.38	0.848603	700	678	919	698	1509	724	655	969	1103	1605	3677	2338	1133	759	1607	1126	1262.5
unknown1429	0.00980952	0.0573499	18	15	2044.25	0.286056	1	20	12	9941	0.0192945	0.102889	19	13.6167	6140.88	3969.87	0.646466	6974	4536	6317	5374	6041	3365	4882	3493	8719	7739	14340	8966	3451	2723	4931	5788	6102.44
unknown1440	0.00980952	0.0573499	18	12	1994.22	0.835382	1	26.3284	12	9722.25	0.0475642	0.181911	22.1642	12.4391	6145.68	5517.14	0.897726	11949	2424	2175	7735	5261	2484	12941	7256	16119	13931	5401	3438	736	1145	433	663	5880.69
unknown1444	0.00980952	0.0573499	18	15	702.687	0.0800479	0.898568	20	12	3542.5	0.00639927	0.0540494	19	13.6167	1965.04	1539.72	0.783556	1651	1082	1825	1462	1297	825	1511	1102	2917	4296	4741	2216	1631	1128	1800	1718	1950.12
unknown1450	0.00980952	0.0573499	24	12	3933.28	0.0408478	0.898568	20	12	21481	0.00353508	0.0396812	22	12.1	8656.4	12977.4	1.49916	2363	2184	2678	3280	8103	2008	4297	2722	19200	15955	33040	17729	3862	1638	3528	3666	7890.81
unknown1454	0.00980952	0.0573499	24	12	7994.55	0.0698264	0.898568	20	12	26455.5	0.0056757	0.0519582	22	12.1	13643.9	13678.6	1.00254	6426	5368	8167	8020	19897	5385	9398	8071	24323	20087	38685	22727	7347	3998	8920	8572	12836.9
unknown1476	0.00980952	0.0573499	18	6	3883.43	0.955715	1	20	6	18850.2	0.0531541	0.19703	19	6.01667	12458.4	7099.41	0.569851	6499	7490	6944	6542	33781	9995	13085	18540	4957	4606	9606	7737	9488	8421	22636	15242	11598.1
unknown1509	0.00980952	0.0573499	24	15	4426.31	0.136012	1	20	12	19041	0.0101659	0.0698839	22	13.475	9532.15	11766.8	1.23444	4202	3137	3236	4986	8739	2638	7191	4313	12519	8500	28915	26230	8136	3145	12091	9473	9215.69
unknown1550	0.00980952	0.0573499	24	18	555.256	0.188789	1	28	17.9999	3516.99	0.0135034	0.0809761	26	18.1071	1443.96	1001.03	0.693249	592	289	390	822	389	310	1323	416	1253	682	850	868	2951	1069	5303	4745	1390.75
unknown1640	0.00980952	0.0573499	18	15	2843.98	0.0423056	0.898568	20	12	8545	0.00364668	0.0401314	19	13.6167	3151.87	4975.08	1.57846	1522	1079	1245	1314	1301	830	867	724	6885	5384	13115	8796	1458	1261	2387	1491	3103.69
unknown1670	0.00980952	0.0573499	18	15	3849.49	0.0779592	0.898568	20	12	12623.5	0.00625251	0.0536078	19	13.6167	5148.91	7037.83	1.36686	4182	2726	3019	2269	3016	1595	2698	1663	9900	8870	20320	11404	1887	1157	2693	3893	5080.75
unknown1680	0.00980952	0.0573499	18	15	8245.93	0.048588	0.898568	20	12	24602	0.00412222	0.0428444	19	13.6167	7832.3	15196.8	1.94027	1694	2299	3141	1706	3090	1671	1075	1621	18824	14715	38748	26121	1741	1600	3094	1822	7685.12
unknown208	0.00980952	0.0573499	18	15	2336.63	0.146929	1	20	12	13322	0.0108706	0.0722152	19	13.6167	8214.26	4970.19	0.605069	7076	6823	7576	6325	7078	5273	5859	5748	11217	9346	19543	13182	6185	4449	7166	7812	8166.12
unknown24	0.00980952	0.0573499	18	3	1335.37	0.246169	1	20	5.86e-05	4480.49	0.0169667	0.094283	19	1.58336	3335.09	1803.43	0.540744	3950	3981	5486	4505	5118	2609	2750	3063	935	975	3043	2077	4073	2895	6317	6478	3640.94
unknown254	0.00980952	0.0573499	18	15	5428.81	0.0411716	0.898568	20	12	25766.2	0.00355991	0.0397612	19	13.6167	15082.5	10521.4	0.697589	12960	10305	13841	13012	13090	7324	10355	10009	23671	22691	31230	25473	10288	9031	13191	13218	14980.6
unknown266	0.00980952	0.0573499	18	6	2173.82	0.981849	1	20	5.99998	9216	0.0543477	0.19969	19	6.01666	7779.55	1571.44	0.201997	6615	6316	6296	6092	12615	6806	8046	9397	3487	3263	7370	4901	8505	6725	12973	12019	7589.12
unknown268	0.00980952	0.0573499	24	12	1860.4	0.331131	1	24.7059	12	7667.25	0.0218595	0.111787	24.3529	12.0025	4823.3	2816.48	0.583933	1674	1129	2081	2121	7821	2794	4439	4545	4840	3985	12982	8862	3682	2312	7401	7029	4856.06
unknown307	0.00980952	0.0573499	18	6	2399.39	0.325267	1	20	6.00001	8796	0.0215294	0.11035	19	6.01667	6882.91	1577.99	0.229263	7175	5263	7462	7084	12172	6255	8355	8402	2162	2019	4238	2758	6225	6040	10853	10604	6691.69
unknown410	0.00980952	0.0573499	18	6	3437.6	0.956974	1	20	6	12586.5	0.0532117	0.19703	19	6.01667	11022.8	1787.67	0.162179	8815	6976	10913	8120	17860	9781	11158	11547	3159	2941	8479	4626	13738	9651	23974	21161	10806.2
unknown508	0.00980952	0.0573499	18	3	3020.58	0.195194	1	20	6	5805.25	0.0138976	0.0822297	19	4.43333	4817.95	3183.79	0.660819	6271	3981	5623	6065	8860	3880	5024	5457	449	582	1894	653	6108	4087	9421	8054	4775.56
unknown546	0.00980952	0.0573499	18	3	1451.34	0.486326	1	20	5.99998	3935.5	0.0302709	0.137289	19	4.43332	3585.46	1715.15	0.478364	4630	2525	3933	3788	6113	3015	3129	3485	1005	1176	2439	1285	4624	3122	6535	6198	3562.62
unknown636	0.00980952	0.0573499	18	12	29208.1	0.584804	1	26.8085	12	119875	0.0353428	0.152001	22.4043	12.4824	73836.3	71186.8	0.964117	142576	37180	27875	98616	60268	33366	148874	89324	164135	126756	106248	82361	4041	4450	2268	5596	70870.9
unknown7	0.00980952	0.0573499	18	3	26395.6	0.237855	1	20	6.15e-05	93242.1	0.0164739	0.0931583	19	1.58336	71242.8	35033.5	0.491748	84964	83713	111614	92678	104464	59228	60492	67411	18702	20568	73327	48593	92859	64379	124391	127566	77184.3
unknown737	0.00980952	0.0573499	18	6	1410.68	0.779132	1	20	6	5586.5	0.0448943	0.176821	19	6.01667	4555.2	953.732	0.209372	4441	3210	4412	4171	8181	3941	5025	5199	1357	1442	3165	1895	5044	3300	8421	7830	4439.62
unknown868	0.00980952	0.0573499	18	15	2997.96	0.682992	1	20	12	16224.8	0.040237	0.163645	19	13.6167	11217.6	5911.28	0.526966	11206	8785	13724	12002	10698	5939	8117	6850	12860	11432	26074	14533	8942	5892	11870	9641	11160.3
unknown871	0.00980952	0.0573499	18	15	3241.02	0.118559	0.996873	20	12	14415.8	0.00902115	0.0653306	19	13.6167	6949.54	7025.32	1.0109	4898	4247	4897	4552	4542	2526	3723	4496	10951	9010	23820	13882	3739	2737	6720	5364	6881.5
unknown889	0.00980952	0.0573499	24	9	5107.61	0.221228	1	25.4179	6	11418.2	0.0154795	0.0888787	24.7089	7.54925	7508.16	5313.39	0.707682	11755	3172	4603	7414	20122	4826	11737	8988	10946	7517	15613	10375	1490	1200	1084	1871	7669.56
unknown93	0.00980952	0.0573499	24	9	22863.9	0.0722379	0.898568	26.3284	6.00001	57368.8	0.00584767	0.052512	25.1642	7.58564	36180.2	24324.6	0.672317	49349	31304	24847	54298	84016	33280	50225	61954	42301	40200	65700	50328	2330	3105	1234	3829	37393.8
unknown947	0.00980952	0.0573499	24	15	925.78	0.0322176	0.898568	20	12	6995.75	0.0028632	0.0354499	22	13.475	3457.49	4663.81	1.3489	2111	2055	1831	1904	2616	1759	2222	1299	6001	4961	9440	7581	2621	1802	2402	2708	3332.06
unknown991	0.00980952	0.0573499	18	15	2115.13	0.673162	1	20	12	8058.25	0.0397536	0.163521	19	13.6167	4971.66	3669.01	0.737985	6482	3454	6708	4628	4276	1505	4357	2306	7546	7309	12657	4721	3061	2005	4188	3775	4936.12
unknown1395	0.0121536	0.0701411	18	15	1771.83	0.142188	1	20	12	6625.5	0.0127201	0.0782374	19	13.6167	3299.24	3496.81	1.05988	2968	2494	3325	3880	2495	825	2986	1489	6936	5753	6914	6899	670	627	1490	2495	3265.38
unknown1430	0.0121536	0.0701411	24	18	735.037	0.152673	1	28	17.9999	2726.49	0.0135261	0.0809761	26	18.1071	1582.05	748.744	0.473274	1141	460	786	1848	877	460	1238	798	1229	1156	1946	1831	2490	1241	3580	3595	1542.25
unknown1507	0.0121536	0.0701411	24	12	1137.03	0.0363103	0.898568	20	12	6640.5	0.00385071	0.040634	22	12.1	2938.65	3760.23	1.27958	1025	1043	1272	1444	2678	1095	1703	1325	6311	4591	9582	6078	1411	850	1736	1325	2716.81
unknown1717	0.0121536	0.0701411	24	12	292.035	0.0934921	0.898568	20	12	5443.25	0.00884017	0.0644357	22	12.1	1653.97	3751.98	2.26847	26	0	20	103	439	0	159	50	5243	3426	10313	2791	127	0	151	74	1432.62
Cer 33:1;4O|Cer 15:1;3O/18:0;(2OH)	0.0144977	0.0706017	18	15	54535.6	0.0709155	0.898568	20	12	376525	0.00810156	0.0627173	19	13.6167	265234	108865	0.41045	264787	223218	257967	235852	274637	179593	215748	227138	387943	406091	371319	340747	214740	188155	230908	208032	264180
HexCer 36:1;2O	0.0144977	0.0706017	18	6	843.932	0.83657	1	20	5.99998	3464.5	0.0656412	0.223989	19	6.01666	2621.62	989.191	0.377321	1779	1390	1882	1820	4207	2790	3481	3380	2141	2333	1789	1673	2174	2528	3510	3151	2501.75
LPG 16:1	0.0144977	0.0706017	18	12	542.174	0.671664	1	24.7059	12	2291.5	0.0548398	0.200514	21.3529	12.3034	1351.09	1398.28	1.03493	2416	91	210	1134	1822	276	3042	1624	4363	3030	643	1130	73	140	47	27	1254.25
PC 38:5 Isomer B	0.0144977	0.0706017	24	12	868.681	0.180007	1	25.5652	12	7567.75	0.0181335	0.0985709	24.7826	12.012	6737.55	1050.9	0.155976	5834	5074	5512	5972	7481	6823	7844	6554	7191	6651	7506	8923	5863	6268	7747	6994	6764.81
PE 24:0|PE 12:0_12:0	0.0144977	0.0706017	24	0	1617.15	0.206882	1	20	7.66e-05	4864.49	0.0204235	0.10663	22	4.21e-05	3662.22	1775.66	0.484857	3624	5315	6582	3937	5400	2594	2277	3491	1301	1755	3223	1736	4789	3350	5893	5556	3801.44
PE 32:1|PE 16:0_16:1	0.0144977	0.0706017	18	3	197322	0.19641	1	20	6.25e-05	624083	0.0195376	0.103938	19	1.58336	467655	245292	0.524514	553098	551690	764647	626901	683326	400972	404142	441257	118014	128988	448163	300860	605612	426834	845272	848300	509255
PI 30:0|PI 14:0_16:0	0.0144977	0.0706017	24	0	561.089	0.274731	1	24.9858	6.63e-05	2450.75	0.0259918	0.124683	24.4929	3.25e-05	1817.51	618.537	0.340321	2948	1957	2423	2475	2874	1239	1257	1518	1240	1293	1500	1013	1690	1259	2310	1933	1808.06
PI 32:3|PI 14:1_18:2	0.0144977	0.0706017	24	15	493.384	0.143226	1	20.7529	12	2173.5	0.0149029	0.0865917	22.3765	13.462	1372.01	985.477	0.718275	864	629	895	806	1742	802	1023	1112	1669	1571	3234	2220	1179	752	1806	1275	1348.69
unknown1009	0.0144977	0.0706017	18	3	1988.38	0.717884	1	25.5652	6.63e-05	7463.99	0.057921	0.206729	21.7826	1.81525	7024.77	4948.67	0.704459	6310	5419	8890	9237	11994	5601	3644	4503	3075	2788	4784	4511	9614	5155	16040	14762	7270.44
unknown1015	0.0144977	0.0706017	18	15	1295.6	0.666027	1	20	12	6308.75	0.0544609	0.199779	19	13.6167	3976.18	2607	0.655654	3914	2635	4975	4515	3720	2075	2848	2377	4660	4076	10611	5888	2355	2029	3342	3195	3950.94
unknown1030	0.0144977	0.0706017	18	15	11506.6	0.444075	1	20	12	56056.8	0.0389215	0.161874	19	13.6167	29984.1	26639.6	0.888457	24967	16024	36326	23744	22825	8091	21408	16461	38920	48476	104417	32414	16938	9101	28166	27340	29726.1
unknown1033	0.0144977	0.0706017	18	3	712.764	0.245371	1	20	6.63e-05	3322.25	0.0236162	0.116521	19	1.58336	2751.15	933.35	0.339259	3322	3458	3137	3372	3823	2255	3012	2827	1111	1426	2368	2446	3465	2293	4017	4219	2909.44
unknown1048	0.0144977	0.0706017	18	12	2252.31	0.123521	1	20	12	6369.25	0.0131176	0.0795919	19	12.0333	3751.49	2908.15	0.775199	2838	1760	2938	3396	3381	1397	4215	2174	7567	4997	6329	6584	787	829	1748	3587	3407.94
unknown1069	0.0144977	0.0706017	18	15	119547	0.115045	0.978322	20	12	435216	0.0123361	0.0767161	19	13.6167	147496	262826	1.78192	51517	46396	60908	56102	62962	30224	49394	27619	302623	240310	814954	382975	46081	39653	61465	46027	144951
unknown1119	0.0144977	0.0706017	24	15	960.958	0.0741961	0.898568	20	12	10729.5	0.0084277	0.0632782	22	13.475	4759.68	7919.64	1.6639	2488	1785	2718	2056	3242	2110	2803	2223	8647	7341	17978	8952	2525	1973	2903	3003	4546.69
unknown1120	0.0144977	0.0706017	18	15	950.528	0.689729	1	20	12	3345.5	0.0560494	0.20272	19	13.6167	2093.97	1488.02	0.710622	2504	1707	2679	2619	2079	812	1981	1150	3367	2656	3577	3782	656	634	1060	2010	2079.56
unknown1168	0.0144977	0.0706017	18	15	1300.02	0.484972	1	20	12	6851	0.0418866	0.168458	19	13.6167	4004.47	2952.65	0.737338	3376	2812	4921	3108	3208	1907	2784	2356	4627	6326	12261	4190	2648	1651	3925	3514	3975.88
unknown1207	0.0144977	0.0706017	24	0	2570.69	0.164962	1	24.9858	6.63e-05	8410.73	0.0168266	0.0942545	24.4929	3.25e-05	5823.87	2831.84	0.486247	7377	8153	9496	8617	6496	3566	3866	3727	2503	5316	5975	1653	4550	4394	8043	8758	5780.62
unknown1279	0.0144977	0.0706017	18	12	3377.14	0.188684	1	20	12	9433	0.0188788	0.101923	19	12.0333	5418.77	4565.99	0.842624	4415	3491	4064	6400	3927	1541	5960	2811	10443	9029	8125	10135	856	1055	1962	3856	4879.38
unknown1297	0.0144977	0.0706017	24	15	13248.5	0.112226	0.972773	20.5594	12	86958.2	0.0120742	0.0762526	22.2797	13.4644	67939.8	23147.8	0.340711	58734	47622	63273	50877	78697	45602	53406	65135	83493	103612	86517	74211	74850	59422	71047	61427	67370.3
unknown1315	0.0144977	0.0706017	24	9	3026.24	0.258506	1	25.7143	5.99999	6175	0.0246849	0.120473	24.8571	7.56071	4005.29	2513.63	0.627577	7341	1529	1867	5244	9922	2242	6186	6350	6803	6145	4240	4230	952	1076	545	890	4097.62
unknown1322	0.0144977	0.0706017	18	15	34854.4	0.02062	0.898568	20	12	158765	0.00272494	0.0343679	19	13.6167	73928.9	77855.3	1.05311	44774	40958	56018	45928	56900	34370	41693	38043	155905	154237	186335	138584	45624	38405	52482	40543	73174.9
unknown1332	0.0144977	0.0706017	18	15	2626.55	0.404	1	20	12	9575.5	0.0359631	0.153576	19	13.6167	5134.77	4816.74	0.938063	5623	3777	5794	6555	4744	1105	5398	2704	9883	7316	11200	9903	892	394	1624	4498	5088.12
unknown1342	0.0144977	0.0706017	18	15	2923.89	0.313661	1	20	12	9062.75	0.0290723	0.133807	19	13.6167	4343.69	5241.38	1.20667	4255	3424	4112	6839	2554	267	4301	1878	10549	8058	9589	8055	0	0	1293	3513	4292.94
unknown1356	0.0144977	0.0706017	18	12	3630.29	0.757216	1	26.1721	12	15673.8	0.0605088	0.211723	22.0861	12.4253	9478.33	8987.08	0.948172	16361	4934	4055	12333	7253	4561	16085	11643	23705	21578	9187	8225	1073	1553	481	1422	9028.06
unknown136	0.0144977	0.0706017	18	12	6511.22	0.0533257	0.898568	20	12	22609.8	0.00631245	0.0538839	19	12.0333	15081.6	8150.65	0.540436	14867	10021	12133	12794	12208	9505	13061	11071	23596	20075	24750	22018	10225	8556	10103	10917	14118.8
unknown1396	0.0144977	0.0706017	18	15	746.174	0.353379	1	20	12	6433.25	0.0321428	0.14261	19	13.6167	4327.7	2150.1	0.496823	5007	3586	4096	4279	4015	2513	4063	3983	7352	8252	5391	4738	2848	2734	3214	2839	4306.88
unknown1401	0.0144977	0.0706017	18	12	2737.74	0.442185	1	26.8085	12	18569.2	0.0387832	0.161837	22.4043	12.4824	12869.6	10180.4	0.791041	22676	6681	6331	17984	18281	6456	23059	17378	25910	26269	11543	10555	1645	1958	737	1666	12445.6
unknown1411	0.0144977	0.0706017	18	12	4441.34	0.179046	1	20	12	11785.8	0.0180506	0.0983583	19	12.0333	6491.94	6001.13	0.924398	5624	3673	5087	7502	4581	1507	6651	2944	13758	10678	11820	10887	776	495	2422	4123	5783
unknown1418	0.0144977	0.0706017	18	12	5673.65	0.758741	1	20	12	24624.8	0.0606086	0.211723	19	12.0333	13833.5	13546.3	0.979235	22599	6058	4826	15424	6626	4946	22144	13297	40629	34224	12802	10844	262	362	33	656	12233.2
unknown145	0.0144977	0.0706017	18	6	5970.46	0.459086	1	20	6.00001	26728.5	0.040016	0.163645	19	6.01667	22805.8	3154.79	0.138333	24263	18283	23243	23413	36650	20819	24619	24826	9108	9706	16053	10130	25152	20450	38086	33975	22423.5
unknown1534	0.0144977	0.0706017	24	18	5635.99	0.131106	1	25.8651	18	18427.5	0.0138098	0.0820186	24.9326	18.0252	11215	5647.49	0.503567	10683	3299	6139	14659	6567	2700	7046	4010	12940	9998	14681	10510	18780	8127	24291	22512	11058.9
unknown1585	0.0144977	0.0706017	18	15	918.708	0.856174	1	20	12	2465.75	0.0668919	0.226847	19	13.6167	1626.4	1203.12	0.739742	1773	964	1342	3696	955	567	1122	642	2272	2126	3046	2419	921	503	1380	2108	1614.75
unknown1606	0.0144977	0.0706017	24	9	3212.39	0.388296	1	25.8651	12	6121.25	0.0347884	0.150759	24.9326	10.4585	3850.1	3212.87	0.83449	8113	918	1391	4469	11275	1390	5451	5471	8464	6367	5174	4480	167	207	55	259	3978.19
unknown1648	0.0144977	0.0706017	18	3	5297.11	0.202098	1	20	6	11202.8	0.0200198	0.105094	19	4.43333	9822.74	6036.81	0.614575	11230	9067	13086	10239	15401	9682	8668	11060	1206	2203	3024	2196	13127	8492	16788	20409	9742.38
unknown1659	0.0144977	0.0706017	24	18	2123.62	0.113145	0.975652	26.9725	17.9999	5000.99	0.0121597	0.0762526	25.4862	18.0614	3056.57	948.291	0.310246	1992	487	1024	2751	1887	580	2340	1243	3807	2481	5725	3953	5362	2019	5786	6837	3017.12
unknown1712	0.0144977	0.0706017	24	9	2838.33	0.803827	1	24.8451	5.99999	6586.5	0.0635374	0.220046	24.4225	7.5282	3619.61	3327.4	0.919271	9442	128	254	2004	17997	306	4136	3907	6164	3648	7376	3459	56	0	0	0	3679.81
unknown204	0.0144977	0.0706017	18	3	877.343	0.495563	1	20	6.63e-05	3928.25	0.0426461	0.170661	19	1.58336	3374.66	1468.37	0.435115	3649	3485	4566	4013	4591	2934	2602	3387	1352	1212	3854	2270	4607	3046	6368	6043	3623.69
unknown225	0.0144977	0.0706017	18	3	2427.5	0.33434	1	22.9091	5.18e-05	9819.99	0.0306795	0.138154	20.4545	1.70457	7666.57	3884.57	0.50669	7990	9609	12797	8884	9564	5977	5519	6426	2129	2439	8947	5408	9448	6465	13815	13525	8058.88
unknown251	0.0144977	0.0706017	24	21	1631.3	0.0947661	0.905319	24.9858	6.63e-05	4654.74	0.010428	0.0705146	24.4929	22.9621	4180.91	1913.12	0.457584	6007	3029	5333	4250	4243	2097	2955	3087	2990	1817	3133	3201	6907	5270	6658	5289	4141.62
unknown358	0.0144977	0.0706017	24	15	2294.56	0.244785	1	20.7529	12	11768.8	0.0235682	0.116521	22.3765	13.462	7572.13	5069.29	0.669467	3562	4950	5999	4021	7745	3732	5357	7012	7193	7287	18226	14369	7318	5483	9736	7245	7452.19
unknown431	0.0144977	0.0706017	24	3	1522.4	0.0441023	0.898568	20	6.63e-05	7556	0.00534205	0.0504773	22	1.37504	6017.98	2464.97	0.409601	8013	6152	7333	8726	8430	5873	6720	6555	3082	2968	4168	4213	5931	5452	7376	7392	6149
unknown456	0.0144977	0.0706017	18	15	1104.32	0.366788	1	20	12	7378.25	0.0331644	0.145418	19	13.6167	5256.94	2181.86	0.415044	5075	3790	5687	4912	4818	3242	4601	4015	6382	5807	10726	6598	3606	3555	5260	5699	5235.81
unknown509	0.0144977	0.0706017	18	3	707.814	0.484318	1	20	6.63e-05	3215.5	0.0418396	0.168458	19	1.58336	2750.92	1152.84	0.419073	2704	3250	3990	2918	4193	2246	2149	2578	1224	1266	3332	1310	3499	3090	4599	4795	2946.44
unknown522	0.0144977	0.0706017	24	9	1237.44	0.0727654	0.898568	26.8085	6	4772.5	0.00828574	0.0631746	25.4043	7.60615	3648.82	1406.47	0.385459	4015	4384	3732	3829	5597	3447	4673	5373	3925	3767	5561	5045	1291	1798	874	2424	3733.44
unknown63	0.0144977	0.0706017	18	6	1338.91	0.733462	1	20	6.00001	4997.25	0.0589495	0.208741	19	6.01667	4362.7	593.254	0.135983	5786	3168	3440	3354	5958	4600	4824	4607	1985	1746	3061	1845	6446	3751	6164	7918	4290.81
unknown654	0.0144977	0.0706017	24	3	777.11	0.0585152	0.898568	20	6	6187.25	0.00684798	0.056825	22	4.675	5523.88	788.346	0.142716	6143	6165	5728	6190	7409	5439	5787	6114	3632	3857	4639	4124	5237	5112	5951	6468	5499.69
unknown667	0.0144977	0.0706017	18	15	3130.72	0.0339953	0.898568	20	12	14873	0.00424609	0.0435405	19	13.6167	8352.43	6208.03	0.74326	6961	5342	7503	6305	7409	4411	5496	5241	13672	13164	18331	14325	6338	4703	6578	6898	8292.31
unknown679	0.0144977	0.0706017	24	0	902.975	0.26811	1	23.52	6.63e-05	3096.74	0.0254602	0.122657	23.76	3.35e-05	2526.68	1087.77	0.430513	2595	3129	3916	2747	2461	2212	1522	2299	932	923	2867	2222	2535	2558	3758	3891	2535.44
unknown719	0.0144977	0.0706017	24	3	1843.25	0.0311003	0.898568	20	4.47e-05	6038.75	0.00392462	0.0409804	22	1.37502	4441.31	2849.23	0.641529	6903	5263	5597	6392	7031	4491	5796	5077	1537	1299	1842	1856	4774	3477	5419	6730	4592.75
unknown775	0.0144977	0.0706017	24	0	7109.25	0.0856821	0.898568	21.1511	6.19e-05	38753.7	0.00955357	0.0678727	22.5755	3.3e-05	30583.2	9304.13	0.304223	36746	44531	44498	29240	23402	35763	33934	33753	22770	26831	18372	13258	34607	31943	33361	34272	31080.1
unknown78	0.0144977	0.0706017	18	3	6663.77	0.501412	1	24.7059	4.62e-05	33654.7	0.0430642	0.171721	21.3529	1.77943	28584.5	17838.1	0.62405	23312	33563	49139	28605	37213	22885	16231	20718	7354	7218	32144	19744	38447	23089	57774	58362	29737.4
unknown845	0.0144977	0.0706017	18	12	498907	0.727667	1	26.6465	12	1.93238e+06	0.0585675	0.208374	22.3233	12.4676	1.15537e+06	1.16424e+06	1.00767	2358883	501326	365492	1570523	802766	441008	2352052	1386651	2816371	2148556	1587863	1176728	33076	46122	16004	66521	1.10437e+06
unknown876	0.0144977	0.0706017	24	9	2451.54	0.2021	1	26.3284	6	5570.5	0.0200199	0.105094	25.1642	7.58563	3459.23	2317.94	0.670074	6878	1507	1743	5348	7606	2290	7176	5210	6593	4974	4475	2482	243	307	194	172	3574.88
unknown888	0.0144977	0.0706017	18	12	4476.16	0.648416	1	26.8085	12	18728.5	0.0532728	0.19703	22.4043	12.4824	11377.8	11192	0.983663	22500	5389	4727	14823	8982	5022	21671	14349	28099	19224	15233	12358	500	476	268	965	10911.6
unknown89	0.0144977	0.0706017	18	3	5691.86	0.35583	1	20	6	10477.5	0.0323301	0.143158	19	4.43333	8929.56	6328.89	0.708757	11866	6836	10213	10378	17314	7195	8979	8422	779	614	1949	1036	10668	6961	20913	17402	8845.31
unknown902	0.0144977	0.0706017	18	6	1823.27	0.289322	1	20	6	6243	0.0271552	0.12744	19	6.01667	4980.08	943.502	0.189455	6294	4600	4973	4803	8859	4915	6059	5139	1824	1121	2200	2323	4855	3674	8493	7720	4865.75
unknown908	0.0144977	0.0706017	18	15	3827.92	0.0936592	0.898568	20	12	14510.2	0.0103221	0.0701266	19	13.6167	5427.29	8329.48	1.53474	1616	2388	3411	2388	2778	1484	1606	2159	9185	7816	24279	16761	2287	1926	2929	2533	5346.62
unknown927	0.0144977	0.0706017	18	0	758.726	0.293144	1	22.9091	17.9999	5040.5	0.0274581	0.127626	20.4545	18.263	4428.22	798.762	0.18038	5908	4148	5714	5049	3998	3337	3859	3688	4557	4887	4002	3530	4533	4335	5031	6263	4552.44
unknown967	0.0144977	0.0706017	18	12	7491.44	0.0411301	0.898568	20	12	18718	0.00502364	0.0490351	19	12.0333	7964.79	11130.8	1.3975	2643	2316	3505	2257	4058	2162	2646	2354	16073	12804	28398	17597	2231	2086	2984	2284	6649.88
unknown973	0.0144977	0.0706017	18	12	1285.87	0.673493	1	20	12	8112.5	0.0549626	0.200636	19	12.0333	5867.97	2676.27	0.456081	7322	4505	4750	5589	4004	4149	6953	5058	10840	10190	5424	5996	3448	3833	3381	3387	5551.81
unknown977	0.0144977	0.0706017	24	9	72724.5	0.485794	1	25.4179	6.00002	154931	0.0419457	0.168458	24.7089	7.54926	94644.6	72395.5	0.764919	218510	16579	23069	95010	310772	26237	158331	124383	170603	103360	158494	108679	9432	9257	5302	11481	96843.7
PG 30:1|PG 14:0_16:1	0.0177588	0.0857387	18	15	286.732	0.322447	1	20	12	1601.5	0.0352892	0.152001	19	13.6167	906.944	684.725	0.754981	759	593	946	643	841	450	444	587	914	1288	2806	1398	695	444	884	713	900.312
unknown604	0.0177588	0.0857387	18	3	446.184	0.810457	1	25.7143	6.63e-05	3245.75	0.0754328	0.247583	21.8571	1.82146	3166.4	1298.06	0.409947	3258	2903	3412	3410	4552	2447	2359	2830	1871	1801	3246	2359	4230	2465	5574	4926	3227.69
unknown635	0.0177588	0.0857387	24	9	15436.1	0.0585578	0.898568	24.5682	12	26000.8	0.00818271	0.0631277	24.2841	10.4839	15234.7	15629.1	1.02589	18316	0	206	19889	21514	30451	22124	27354	17045	22486	37445	27027	0	1411	784	744	15424.8
unknown960	0.0177588	0.0857387	24	12	640.992	0.0407985	0.898568	20	12	13170.2	0.00596289	0.0533205	22	12.1	6127.21	6952.31	1.13466	3128	3182	3382	2839	3944	3548	3295	2473	11193	9490	19401	12597	3332	2876	3295	3498	5717.06
CL 64:5|CL 12:0_18:2_16:1_18:2	0.0210199	0.0887023	24	15	399.162	0.475622	1	22.5575	12	2089.5	0.0560403	0.20272	23.2788	13.4665	1470.86	744.123	0.505912	1032	789	964	935	1985	899	1124	1302	1355	1470	3601	1932	1372	1110	1913	1608	1461.94
Cer 34:1;3O|Cer 15:1;2O/19:0;O	0.0210199	0.0887023	24	3	6819.16	0.0349891	0.898568	20	5.1e-05	20986.2	0.00604186	0.0533205	22	1.37503	14985.5	11150.5	0.744088	23492	17445	21860	21148	26342	14285	20133	17108	4030	2893	5192	4151	15365	11948	22619	21240	15578.2
Cer 37:2;3O|Cer 15:2;2O/22:0;O	0.0210199	0.0887023	18	15	5344.31	0.053265	0.898568	20	12	16819.5	0.0087272	0.0642379	19	13.6167	6992.84	8980.23	1.2842	4274	3305	3612	3512	3485	2660	3609	3303	13548	11319	26159	16252	3627	2523	4149	5157	6905.88
DG 32:1	0.0210199	0.0887023	18	3	1010.63	0.27863	1	24.5682	6.63e-05	8069.74	0.0359614	0.153576	21.2841	1.77371	7076.64	2555.19	0.361074	8627	5883	10222	7547	7705	5079	5525	6193	4682	3635	6556	6784	9851	6796	11842	9046	7248.31
FA 25:0	0.0210199	0.0887023	24	9	1577.56	0.412394	1	24.0327	6.00001	6718.5	0.0498269	0.188319	24.0163	7.50103	4878.51	2137.65	0.438177	3857	3197	3666	4877	11778	3825	5841	5430	7395	6708	4460	4867	2709	2231	2436	4803	4880
LPC 20:5	0.0210199	0.0887023	24	9	203.824	0.297058	1	24.0327	5.99999	813	0.03794	0.159206	24.0163	7.50102	481.744	276.945	0.57488	581	335	324	619	1509	288	547	908	425	413	468	690	180	245	73	106	481.938
LPS 16:1	0.0210199	0.0887023	24	9	1388.58	0.197151	1	24.1644	6.00001	3253.75	0.0268788	0.126767	24.0822	7.50521	1854.95	1401.99	0.755814	3668	90	587	1600	4196	1321	4304	3194	3115	2410	1389	2207	336	256	197	888	1859.88
PE 36:1	0.0210199	0.0887023	18	3	215611	0.26646	1	20	6	473736	0.0346409	0.150423	19	4.43333	411191	239367	0.58213	524380	339393	479780	479289	704643	358828	413801	417674	74723	84490	180493	106575	487197	337075	822355	717384	408005
PE 38:1|PE 20:0_18:1	0.0210199	0.0887023	18	6	44307	0.641234	1	20	6.00001	201900	0.0715265	0.238599	19	6.01667	171406	24881.6	0.145162	184708	127852	172128	176716	295961	147318	179466	184856	60891	58798	118613	66054	180130	139001	322231	279528	168391
PE P-36:1 or PE O-36:2	0.0210199	0.0887023	18	15	24471.2	0.0463351	0.898568	20	12	68454.2	0.00772752	0.0610463	19	13.6167	26563	38709.1	1.45726	14941	10920	14888	13633	13058	7845	11400	11207	54990	48591	103123	67113	11003	7321	16010	12967	26188.1
PI 32:0|PI 16:0_16:0	0.0210199	0.0887023	24	0	811.051	0.35714	1	21.1511	6.13e-05	3010.25	0.0442308	0.175129	22.5755	3.27e-05	2284.04	834.89	0.365532	3623	2702	3076	2640	4212	1701	1565	2031	1151	1009	1919	1393	2393	1764	3330	2749	2328.62
unknown1012	0.0210199	0.0887023	18	15	2593.84	0.196463	1	20	12	8342.75	0.0267995	0.126663	19	13.6167	4252.2	4280.1	1.00656	5088	2328	5829	2099	3464	575	3195	2168	9142	5965	11041	7223	1380	1246	3080	3549	4210.75
unknown1028	0.0210199	0.0887023	18	12	12445.3	0.52349	1	27.1385	12	58748.2	0.0606251	0.211723	22.5692	12.5129	37505.6	34645.1	0.923734	73253	18531	13582	56706	35891	15303	75951	48648	72252	60070	59410	43261	1584	1766	937	2283	36214.2
unknown1043	0.0210199	0.0887023	18	12	2979.04	0.720447	1	26.1721	12	10027.8	0.0785984	0.255359	22.0861	12.4253	5726.4	6170.41	1.07754	11777	2209	2058	6971	3726	1899	11359	6421	13740	11216	9075	6080	0	0	0	145	5417.25
unknown1057	0.0210199	0.0887023	18	6	864.084	0.834531	1	20	6	3792	0.088466	0.280914	19	6.01667	3154.07	629.272	0.199511	3215	2266	2849	2690	4898	2569	4424	3277	1194	1616	2865	1680	3497	2938	4689	4578	3077.81
unknown1068	0.0210199	0.0887023	18	3	8143.22	0.0705361	0.898568	20	5.99997	15374.8	0.0111406	0.0729172	19	4.43332	12216.1	8588.15	0.703017	16110	11248	16946	15681	22820	11017	12295	15367	950	1348	1878	1496	15762	11914	21032	17765	12101.8
unknown1072	0.0210199	0.0887023	24	9	2167.81	0.584922	1	25.8651	5.99999	4563.5	0.0663753	0.225435	24.9326	7.56669	2911.46	1911.99	0.65671	6985	913	867	3104	9445	1155	4077	3577	4160	3322	4844	3463	456	431	131	876	2987.88
unknown1094	0.0210199	0.0887023	18	15	741.048	0.0691458	0.898568	20	12	3459.75	0.0109499	0.0723017	19	13.6167	1952.18	1431.94	0.733506	1815	1521	1486	1275	1763	839	1407	1299	2907	3635	4681	2616	1453	990	1548	1778	1938.31
unknown1101	0.0210199	0.0887023	18	12	1915.2	0.0900068	0.898568	20	12	5999.5	0.0137546	0.0820126	19	12.0333	3233.2	2886.64	0.892814	1914	2290	1857	2377	2417	1028	1918	1644	5415	3940	9147	5496	1553	1612	1905	1762	2892.19
unknown1113	0.0210199	0.0887023	18	15	1101.14	0.201952	1	20	12	4248.5	0.0274313	0.127626	19	13.6167	2272.29	2069.63	0.910812	2212	1767	1962	2812	1592	729	2330	1290	4214	3358	4393	5029	534	528	1164	2122	2252.25
unknown1136	0.0210199	0.0887023	18	12	1202.44	0.514397	1	26.8085	12	7110.25	0.0597615	0.21062	22.4043	12.4824	4641.01	4228.39	0.911092	10780	1373	1135	5947	7503	1642	8636	5577	8969	6838	7780	4854	116	55	105	128	4464.88
unknown1205	0.0210199	0.0887023	18	12	7657.61	0.954081	1	20	12	34902	0.0984542	0.304449	19	12.0333	20330.6	18954.2	0.932299	42948	3863	1947	22110	7298	3748	50414	17527	70899	41355	14487	12867	0	0	0	0	18091.4
unknown1234	0.0210199	0.0887023	18	12	3018.11	0.156268	1	20	12	8358.25	0.0220684	0.112089	19	12.0333	4827.65	3942.29	0.816605	3815	2597	3408	5026	3731	1374	5758	2539	10315	7312	8032	7774	914	952	1974	4270	4361.94
unknown1244	0.0210199	0.0887023	18	3	1550.69	0.356263	1	20	6	3545	0.0441406	0.175129	19	4.43333	3085.84	1771.9	0.574203	3386	3165	3798	3081	5868	2700	2096	3516	626	476	1134	1354	3789	2612	5933	5462	3062.25
unknown1266	0.0210199	0.0887023	24	9	7573.11	0.433723	1	26.1721	6	11858.8	0.0519442	0.193712	25.0861	7.57915	7633.15	5799.04	0.759718	19264	1108	1425	9889	15032	2241	18261	11901	16386	12052	11452	7301	0	70	67	0	7903.06
unknown1269	0.0210199	0.0887023	18	15	5141.2	0.0572554	0.898568	20	12	20826.2	0.00929406	0.0664496	19	13.6167	9339.74	10867.2	1.16355	6864	4665	6638	5459	5262	2351	6670	3684	20872	22762	28567	11104	7273	3530	5407	6644	9234.5
unknown1276	0.0210199	0.0887023	18	12	1281.28	0.251137	1	20	12	3699.25	0.0329615	0.145292	19	12.0333	2127.28	1799.04	0.845702	1733	1419	1733	2674	1462	519	2348	1071	4147	3545	3188	3917	279	307	737	1557	1914.75
unknown1283	0.0210199	0.0887023	24	18	36580.8	0.487332	1	28	17.9999	286027	0.0571708	0.204376	26	18.1071	229772	19919.5	0.0866925	215417	62192	192788	283558	193847	179970	213421	212367	232962	232018	238349	258418	261362	229076	323822	329849	228714
unknown1335	0.0210199	0.0887023	24	12	1045.81	0.0332147	0.898568	20	12	5923.25	0.0057718	0.0522487	22	12.1	2563.6	3385.53	1.32061	940	772	775	1313	1926	623	2053	1030	4990	4068	8145	6490	927	637	1335	1798	2363.88
unknown1382	0.0210199	0.0887023	18	3	314.486	0.067596	0.898568	27.8233	17.9999	19698.9	0.0107367	0.0717378	22.9117	9.3205	11248.2	4362.04	0.387798	9108	6307	9251	13453	9966	4206	8894	8506	8433	6219	12003	8355	19344	18575	18206	22671	11468.6
unknown1385	0.0210199	0.0887023	18	12	4299.92	0.286895	1	20	12	13061.2	0.0368519	0.155805	19	12.0333	7916.65	5854.26	0.739487	7256	4789	7503	8663	6814	2328	8367	3935	14974	10058	14065	13148	1561	1585	3694	6861	7225.06
unknown1428	0.0210199	0.0887023	24	3	580.888	0.336225	1	20	6	4411.75	0.042067	0.168644	22	4.675	3839.34	650.567	0.169448	4022	3575	4509	4284	5860	3421	4392	3974	3166	3469	2871	3026	3403	3183	4163	3792	3819.38
unknown1435	0.0210199	0.0887023	18	3	2904.44	0.448407	1	20	4.45e-05	9756.49	0.053389	0.197135	19	1.58335	7706.51	4089.13	0.530607	5826	11871	14635	6694	11846	7007	3843	6446	2421	2449	7546	5531	12000	8458	14271	13556	8400
unknown1453	0.0210199	0.0887023	18	12	1905.65	0.139813	1	20	12	8364.5	0.0200715	0.105094	19	12.0333	6367.62	2205.12	0.346302	6657	4750	5879	5096	7166	4006	5676	5531	8435	8507	8608	7908	4538	3828	5325	5804	6107.12
unknown1517	0.0210199	0.0887023	18	12	968.029	0.38197	1	26.4865	12	6655.5	0.0467663	0.179843	22.2432	12.4532	4420.43	3918.47	0.886446	8578	1595	1468	5766	5942	1937	8492	6776	9076	8401	5367	3778	142	240	65	224	4240.44
unknown1592	0.0210199	0.0887023	24	3	1056.59	0.029235	0.898568	20	6	6093.25	0.00515866	0.0499189	22	4.675	5084.95	1163.06	0.228727	6183	4835	5171	5881	6359	5639	6147	6228	3164	4158	3450	4445	4848	5024	4290	4966	5049.25
unknown1641	0.0210199	0.0887023	18	15	3092	0.0536691	0.898568	20	12	10958	0.00878487	0.0642412	19	13.6167	4016.44	6350.86	1.58122	1598	1606	1537	2192	1735	570	2094	1333	8890	6170	16662	12110	1323	1384	2738	1337	3954.94
unknown168	0.0210199	0.0887023	18	3	589.374	0.397985	1	20	6.1e-05	2468.5	0.0483834	0.18404	19	1.58336	1871.62	971.119	0.518866	1954	2382	3401	2137	2692	1446	1272	1554	431	649	1960	1375	2338	1568	3804	3618	2036.31
unknown1710	0.0210199	0.0887023	24	15	3175.97	0.0729239	0.898568	20	12	14967.2	0.0114667	0.0737964	22	13.475	6823.51	10704.2	1.56872	3680	1568	2770	6197	3666	1383	3871	2035	11515	7705	20210	20439	4947	1957	6201	6426	6535.62
unknown199	0.0210199	0.0887023	18	15	2627.26	0.316903	1	20	12	19572	0.0400438	0.163645	19	13.6167	16451.3	3831.66	0.232909	17301	13906	18870	15647	15052	11015	15780	13371	17989	17824	21676	20799	15743	13400	18204	16050	16414.2
unknown260	0.0210199	0.0887023	18	15	1122.53	0.03567	0.898568	20	12	4550	0.00614498	0.0533205	19	13.6167	2816.59	1661.04	0.589735	2335	1879	2667	2169	2231	1924	1917	1870	4050	4110	5758	4282	2251	1867	3004	2494	2800.5
unknown277	0.0210199	0.0887023	18	6	1391.41	0.890412	1	20	6.00001	4520.75	0.0931766	0.29351	19	6.01667	3860.68	653.443	0.169256	3568	2282	3482	3260	7462	3148	3660	3813	407	296	1274	733	4762	2625	10701	9031	3781.5
unknown280	0.0210199	0.0887023	18	6	8819.39	0.228973	1	20	6.00001	32957.8	0.0304972	0.137759	19	6.01667	25296.1	5937.13	0.234705	29317	21733	26459	27116	48713	23010	30404	29704	8066	6981	13660	8689	26053	18068	36991	38262	24576.6
unknown314	0.0210199	0.0887023	18	15	49231.6	0.144379	1	20	12	288996	0.0206296	0.107207	19	13.6167	179260	106309	0.593046	171525	132672	154616	152685	157980	101173	144765	130702	250693	213661	413556	278075	125203	89595	165842	168943	178230
unknown343	0.0210199	0.0887023	18	3	1849.61	0.594649	1	24.8451	6.63e-05	7844.99	0.0672729	0.227451	21.4225	1.78524	7161.89	4111.7	0.574108	6230	7789	11507	5854	8964	5718	5320	6867	2393	2516	8032	4389	9907	6653	12851	13685	7417.19
unknown393	0.0210199	0.0887023	18	3	1195.72	0.521607	1	24.8451	6.63e-05	5440.74	0.0604466	0.211723	21.4225	1.78524	4599.25	2970.42	0.645848	3629	5563	8060	4511	6215	3605	1900	2932	1645	942	5189	2959	5718	3639	10205	9827	4783.69
unknown444	0.0210199	0.0887023	24	12	17534.8	0.372771	1	24.8451	12	66790.2	0.045831	0.178148	24.4225	12.0036	41843.5	25189.3	0.60199	16519	9372	16587	16514	67472	22998	41316	41704	37884	34329	113719	81229	31180	16905	65348	62039	42194.7
unknown483	0.0210199	0.0887023	18	6	2001.47	0.31365	1	20	6.00001	7526.5	0.0397008	0.163521	19	6.01667	5915.71	1248.85	0.211108	5561	4431	7776	6458	10833	6225	6565	6483	1716	2281	3038	2271	6431	3850	9592	8719	5764.38
unknown499	0.0210199	0.0887023	18	3	10561.9	0.555172	1	20	6	23222.8	0.0636085	0.220046	19	4.43333	19196.1	12531.2	0.652802	23555	10518	22513	21365	34175	17136	20163	21417	2818	4219	7379	6154	25664	10482	40989	35921	19029.2
unknown514	0.0210199	0.0887023	24	12	2492.2	0.0630363	0.898568	20	12	15279.8	0.010105	0.0698022	22	12.1	8209.44	7069.51	0.861144	3932	3703	5035	5981	7384	5071	6102	4429	12881	9872	22406	15960	4989	3557	7511	5865	7792.38
unknown520	0.0210199	0.0887023	24	15	2716.7	0.453396	1	23.6461	12	12858.5	0.0538775	0.198613	23.8231	13.4896	8627.66	5043.85	0.584614	5054	3664	4752	4772	10603	5646	7384	7576	7506	6704	22085	15139	7073	5274	13143	11418	8612.06
unknown614	0.0210199	0.0887023	18	6	1251.58	0.224293	1	20	5.99999	5959.5	0.0299712	0.136482	19	6.01666	5126.47	609.864	0.118964	5546	5210	5066	5253	7786	5123	5381	5548	2164	2370	3833	3298	5640	4623	7273	6727	5052.56
unknown702	0.0210199	0.0887023	24	12	781.707	0.0992677	0.922865	20	12	5333.5	0.0149655	0.0865917	22	12.1	3183.21	2125.65	0.667767	2292	1628	2311	1969	2718	2389	2030	2526	4381	3676	8118	5159	1919	1606	3010	3193	3057.81
unknown758	0.0210199	0.0887023	24	15	2379.77	0.0647224	0.898568	20	12	11350.5	0.0103394	0.0701266	22	13.475	5761.52	7269.88	1.2618	3098	2736	3989	3415	4085	2138	3970	2272	9797	7345	17431	10829	3806	2745	6652	4748	5566
unknown784	0.0210199	0.0887023	18	15	2139.35	0.0923232	0.898568	20	12	10252	0.0140593	0.0824959	19	13.6167	5659.89	4435.04	0.783591	4768	3585	4826	4801	4674	2518	4405	3274	8764	7565	14388	10291	3050	2432	5685	4845	5616.94
unknown80	0.0210199	0.0887023	18	3	23709.5	0.318634	1	20	6	54744	0.040226	0.163645	19	4.43333	47904.4	27192.3	0.567636	61829	38921	55867	53278	83722	41386	46734	47134	8746	9786	24073	13241	58772	37847	95074	84269	47542.4
unknown834	0.0210199	0.0887023	18	15	4665.49	0.472652	1	20	12	25500.2	0.0557525	0.20272	19	13.6167	15413.2	10402.2	0.674887	14105	10761	18657	12582	14663	5971	12162	10074	18818	21143	41963	20077	8896	3995	13559	17573	15312.4
unknown899	0.0210199	0.0887023	18	3	1346.86	0.510187	1	20	5.99998	6955.25	0.0593606	0.209535	19	4.43332	6493.57	1733.25	0.266918	6106	6567	6899	6354	8933	6242	6142	6504	4168	4249	3212	6433	8134	6742	8383	8460	6470.5
unknown1158	0.0254844	0.107341	24	0	416.486	0.272276	1	20.7529	7.75e-05	3211.25	0.0414289	0.16728	22.3765	4.18e-05	2808.91	553.099	0.196909	3577	3367	2824	3077	2670	2231	3111	2997	3000	2547	1854	1736	3367	2762	3146	3224	2843.12
Cer 34:1;2O|Cer 14:1;2O/20:0	0.0299489	0.111687	18	6	3314.56	0.698673	1	20	6	16536.2	0.101836	0.31105	19	6.01667	13337.2	2846.8	0.213448	14217	10115	13544	12025	25177	11560	15245	14163	5519	4734	10661	7487	13560	9963	20815	19091	12992.2
Cer 34:1;3O|Cer 14:0;2O/20:1;O	0.0299489	0.111687	24	3	13234.6	0.0421296	0.898568	20	4.3e-05	39321.5	0.00968417	0.06838	22	1.37502	28074.3	20403.9	0.726784	46252	31593	42495	36946	48921	26693	36701	32200	7555	5874	10570	8398	28168	21512	43618	39044	29158.8
Cer 38:3;2O|Cer 16:2;2O/22:1	0.0299489	0.111687	18	15	24064.6	0.165292	1	20	12	132963	0.0312281	0.139934	19	13.6167	73818.6	56322.3	0.762982	69499	44377	58908	55265	66412	32224	54545	42321	111944	89760	211450	118698	49115	29385	70154	68313	73273.1
FA 18:2 (linoleic acid)	0.0299489	0.111687	24	21	144073	0.12077	1	27.3065	17.9999	789199	0.0239518	0.11715	25.6533	19.6784	559637	150826	0.269507	498848	359092	500690	657928	569693	258212	435470	486535	486382	375740	574247	438075	824045	751822	740712	840223	549857
GlcCerd14:14E/20:02OH	0.0299489	0.111687	18	6	2369.34	0.0963655	0.91283	20	5.99997	9030.25	0.0197633	0.104397	19	6.01665	7141.14	1317.4	0.18448	9138	6255	8237	7645	12386	7266	8507	7962	2723	2784	3033	3102	6678	6420	9449	10119	6981.5
LPA 17:1	0.0299489	0.111687	24	9	1147.28	0.961781	1	23.7736	12	4724.75	0.13098	0.377471	23.8868	10.5073	3162.23	1817.3	0.57469	1920	1419	1912	1650	5089	2892	2990	4911	2514	1554	2126	12705	1022	1255	1195	5301	3153.44
LPC 12:0/0:0	0.0299489	0.111687	24	9	22916.3	0.44137	1	26.6465	5.99999	47014.2	0.0704038	0.235465	25.3233	7.59913	31123	18205.7	0.58496	71855	10906	12491	45913	56501	14779	72988	43789	58634	42840	41150	22875	4958	6295	3610	4900	32155.2
LPC 14:1/0:0	0.0299489	0.111687	24	9	7719.31	0.356968	1	26.8085	6	20841.2	0.0592097	0.209332	25.4043	7.60616	13375.8	6982.1	0.521996	31652	6766	5806	20773	24539	7645	30585	20596	23533	16891	13109	9443	2243	2532	1778	2842	13795.8
LPE 20:2	0.0299489	0.111687	18	12	1081.17	0.714439	1	20	12	6390	0.103657	0.315752	19	12.0333	3714.44	3393.99	0.913727	5194	2725	2153	4152	2223	1653	4748	3672	10227	8292	3546	3495	192	238	113	393	3313.5
LPI 18:2	0.0299489	0.111687	18	12	9047.43	0.191071	1	24.0327	12	31996.5	0.0352691	0.152001	21.0163	12.2524	20071.7	17863.8	0.889998	22999	399	2845	10514	29020	8187	46467	29473	51220	32768	15345	28653	4291	5129	1947	9668	18682.8
PE 28:0|PE 12:0_16:0	0.0299489	0.111687	18	3	3193.65	0.271772	1	20	6.63e-05	10535.2	0.0472979	0.181242	19	1.58336	8223.82	3612.25	0.439242	11269	8605	12112	10155	13128	6541	7354	8290	3749	3624	7552	4316	9714	6964	14518	13492	8836.44
PE 30:1|PE 14:0_16:1	0.0299489	0.111687	18	3	14875.4	0.339593	1	22.6735	5.66e-05	57511.4	0.0568352	0.203977	20.3368	1.69476	43814.1	23802.1	0.543251	46047	56898	77768	49333	59198	34094	29564	33627	10928	11966	51396	28244	54958	37491	82448	77509	46341.8
PE 34:1	0.0299489	0.111687	18	3	71517.8	0.477416	1	20	6.63e-05	382094	0.0750311	0.246625	19	1.58336	339198	86235.1	0.254233	362819	340917	443289	381352	499389	290248	285675	360548	180091	254541	327689	266120	407791	334956	488741	436993	353822
PE 36:1|PE 18:0_18:1	0.0299489	0.111687	18	3	88423.3	0.0758758	0.898568	20	6	212906	0.0161043	0.091749	19	4.43333	180173	90996.3	0.50505	215113	173411	229691	214836	294135	163837	177994	215656	53406	69600	79125	61988	227745	177700	268776	240371	178962
PE-Cer 36:2;3O	0.0299489	0.111687	18	12	90134.9	0.0244141	0.898568	20	12	226748	0.00601089	0.0533205	19	12.0333	132289	98617	0.745465	90435	90987	99060	89376	99677	60074	81411	91556	218172	236136	244072	208614	80211	65440	90999	84009	120639
PI 36:1	0.0299489	0.111687	24	0	56912.2	0.116977	0.988437	20	6.63e-05	235236	0.0233113	0.116042	22	3.65e-05	185244	66079.5	0.356717	252631	202306	242297	243712	302183	151090	169475	208224	81087	80905	135537	113380	191076	161437	267999	243453	190424
PI 38:1|PI 20:0_18:1	0.0299489	0.111687	18	3	2536.04	0.6455	1	20	6.00001	8293.5	0.0956161	0.2979	19	4.43334	7038.1	3674.32	0.522061	7673	5534	7803	6161	12604	6231	6079	8260	2442	2628	4374	3159	8001	6549	13558	10771	6989.19
unknown1007	0.0299489	0.111687	18	12	3878.3	0.565318	1	27.1385	12	17229.8	0.0859847	0.274588	22.5692	12.5129	11115.7	9924.66	0.892849	21701	5244	4765	16437	10049	4251	22212	14937	21655	17452	17360	12452	717	879	543	1279	10745.8
unknown1114	0.0299489	0.111687	18	3	3503.71	0.489399	1	25.4179	4.89e-05	23320.7	0.0765511	0.250521	21.7089	1.8091	21729.7	10769.3	0.495602	16061	21883	32670	22669	26253	17471	13786	20428	6180	10253	24153	18674	30437	23771	37965	33997	22290.7
unknown1142	0.0299489	0.111687	24	21	1152.58	0.240741	1	23.9024	17.9999	3914.24	0.0427715	0.170858	23.9512	19.497	2849.93	1171.39	0.411023	2312	2860	3735	4387	1786	1794	1401	2081	1602	1261	3394	3368	5174	2455	3601	4427	2852.38
unknown1185	0.0299489	0.111687	18	15	1879.84	0.935677	1	20	12	29234	0.128196	0.371258	19	13.6167	26456.7	3465.16	0.130975	26533	27258	28164	25619	30679	20473	22599	24178	27480	28883	32987	27586	25382	22168	27131	25651	26423.2
unknown1229	0.0299489	0.111687	18	3	3999.04	0.354231	1	20	5.99998	7990.5	0.0588374	0.208698	19	4.43332	6348.1	4350.55	0.685331	8172	4590	7826	6304	12887	4797	6458	7820	1174	1563	2163	1019	7862	5678	13108	9222	6290.19
unknown1252	0.0299489	0.111687	18	15	952.119	0.110412	0.968258	20	12	5187.75	0.022194	0.11232	19	13.6167	2774.79	2230.9	0.803988	1747	1929	1926	1991	1798	1170	1741	2157	4127	3522	8421	4681	2170	1679	1912	3080	2753.19
unknown1253	0.0299489	0.111687	24	6	338.527	0.434178	1	21.6708	6	3749.5	0.0694702	0.233474	22.8354	6.01565	3308.13	341.483	0.103225	3466	3186	3442	3415	4297	3389	3448	3864	3136	3893	2261	3088	2819	3317	2805	2902	3295.5
unknown1285	0.0299489	0.111687	18	6	4202.34	0.869867	1	20	6	20067.2	0.121079	0.357662	19	6.01667	15726.7	3932.97	0.250082	16657	11000	16168	13229	33462	14800	14893	17114	4309	3675	11344	8549	13904	9017	29219	26662	15250.1
unknown1299	0.0299489	0.111687	18	15	1265.72	0.0502574	0.898568	20	12	6993.5	0.011287	0.073447	19	13.6167	4419.61	2476.28	0.560295	3468	3295	4860	3499	3970	2785	3914	2824	7465	5732	7651	7126	2994	3153	3572	4022	4395.62
unknown1317	0.0299489	0.111687	24	15	799.207	0.093298	0.898568	20	12	7612	0.0192245	0.10276	22	13.475	3404.24	5604.73	1.6464	1558	1754	2088	1688	2025	1233	1905	1290	5755	4507	12950	7236	1976	1422	2377	2292	3253.5
unknown1327	0.0299489	0.111687	18	15	2544.52	0.700955	1	20	12	9477	0.1021	0.311434	19	13.6167	5689.61	4432.43	0.77904	6650	4154	7378	7314	5948	1816	5355	2478	9372	6327	12256	9953	1637	1277	3108	5324	5646.69
unknown1346	0.0299489	0.111687	18	3	775.696	0.724703	1	20	4.59e-05	4912.5	0.104836	0.318913	19	1.58336	4483.45	968.404	0.215995	4184	4912	6072	4482	6852	4346	3432	4479	2751	3084	4422	3882	5294	4645	6082	5444	4647.69
unknown1377	0.0299489	0.111687	24	18	12788.7	0.218382	1	25.7143	17.9999	55159.4	0.0394366	0.163521	24.8571	18.0214	36117.6	16841.4	0.466292	37493	16048	20669	58076	28709	11873	25234	17140	34120	31403	41345	28234	56250	32495	71931	59962	35686.4
unknown1414	0.0299489	0.111687	24	15	4105.46	0.0164621	0.898568	20	12	85070.2	0.00424738	0.0435405	22	13.475	31187.4	71921.1	2.30609	9980	9789	10055	9085	14616	8992	12569	8225	84733	79279	103062	73207	13680	10992	10460	9326	29253.1
unknown1420	0.0299489	0.111687	18	15	45434.4	0.159798	1	20	12	251198	0.030352	0.137379	19	13.6167	167419	82596.6	0.493351	171739	110670	169613	151466	207211	91106	97812	135452	224600	245276	293610	241304	131184	100258	171753	122857	166619
unknown1424	0.0299489	0.111687	18	6	999.142	0.538286	1	20	6.00001	4089	0.082663	0.265872	19	6.01667	3280.32	671.617	0.204741	3921	3158	3584	2238	3135	2348	5327	5546	1983	1023	1959	1715	3203	2702	4568	4773	3198.94
unknown1431	0.0299489	0.111687	18	15	1611.14	0.441974	1	20	12	5592	0.0704821	0.235465	19	13.6167	3012.81	2780.97	0.923048	2764	2183	2753	4751	2418	239	3533	1862	6339	4990	5757	5282	0	255	1550	3098	2985.88
unknown1443	0.0299489	0.111687	18	15	822.719	0.220201	1	20	12	3174.75	0.0397103	0.163521	19	13.6167	1697.86	1521.4	0.89607	1346	1275	1449	2349	1166	512	1850	1045	3778	2885	2864	3172	368	315	803	1753	1683.12
unknown1455	0.0299489	0.111687	24	21	1551.75	0.328986	1	24.9858	17.9999	6030.98	0.0553727	0.201805	24.4929	19.5381	4224.63	1699.79	0.402352	2890	4847	5636	5162	4900	1897	1661	3623	1802	2096	4734	3663	7565	3795	7178	5586	4189.69
unknown148	0.0299489	0.111687	18	3	9710.7	0.545853	1	20	6.55e-05	37649.5	0.0835968	0.267724	19	1.58336	31311.3	15539.6	0.496294	31596	33990	49626	35386	45885	27290	23311	27174	7233	7768	36269	23612	42994	28232	64223	58559	33946.8
unknown1486	0.0299489	0.111687	24	9	17507.6	0.337589	1	26.1721	5.99999	37335.8	0.0565596	0.203488	25.0861	7.57914	24826.3	15655.6	0.630604	48165	8946	11557	34185	62004	12181	36121	39037	44726	41651	27463	25000	4805	5427	2508	5104	25555
unknown159	0.0299489	0.111687	18	3	13771.4	0.49789	1	20	6	25014.2	0.0776227	0.252922	19	4.43333	21771.5	15510.3	0.712413	29916	14506	25791	25215	45088	15567	20611	18791	1064	1501	4612	1870	25362	14322	54904	45920	21565
unknown1596	0.0299489	0.111687	18	6	2365.63	0.979047	1	20	6	14337	0.132809	0.380788	19	6.01667	11747.3	2889.55	0.245976	9240	10486	11020	6645	11804	10198	17369	17977	9649	10381	8577	6875	12637	9955	13477	16064	11397.1
unknown1614	0.0299489	0.111687	18	12	4035.46	0.898284	1	28	12	20338.5	0.12417	0.363919	23	12.5952	12439	12250.3	0.984833	28148	6568	5337	19000	10877	4947	22917	13795	32350	30140	11396	7468	218	343	49	402	12122.2
unknown1631	0.0299489	0.111687	24	15	2543.64	0.152714	1	20	12	11589.5	0.0292138	0.133847	22	13.475	6242.03	6870.57	1.10069	3654	3095	4189	3384	6977	2666	3169	3827	8274	7787	19768	10529	4910	2937	6811	4939	6057.25
unknown1668	0.0299489	0.111687	24	15	736.098	0.0423242	0.898568	20	12	5075.5	0.00972306	0.06838	22	13.475	1900.26	4213.79	2.21747	473	594	554	617	1624	401	667	502	5169	4202	7754	3177	799	444	964	650	1786.94
unknown1701	0.0299489	0.111687	18	15	2015.61	0.439139	1	20	12	14282.2	0.0701147	0.234936	19	13.6167	9685.96	4720.32	0.487336	9947	7189	9175	9434	7440	5462	8881	8065	12567	11631	21978	10953	6977	4431	9979	10135	9640.25
unknown205	0.0299489	0.111687	18	15	4701.91	0.292102	1	20	12	31379.2	0.0502049	0.189429	19	13.6167	20912.5	10374.7	0.496098	21698	14183	19763	19484	19645	12408	17537	15906	26664	22186	45719	30948	15075	11079	19828	20870	20812.1
unknown224	0.0299489	0.111687	18	12	1772.01	0.277848	1	20	12	10588	0.0481713	0.183607	19	12.0333	7838.65	3003.72	0.383194	7799	5707	7702	6584	6978	5202	7193	6734	9418	8235	14331	10368	5582	4335	6539	7034	7483.81
unknown399	0.0299489	0.111687	18	15	21477.8	0.113819	0.975652	20	12	112398	0.0227752	0.113876	19	13.6167	62972.1	47285.4	0.750895	56800	41937	51873	48508	52748	31772	46122	39481	94100	76142	164644	114708	43327	25967	54418	57679	62514.1
unknown526	0.0299489	0.111687	18	3	1968.23	0.140348	1	20	6.63e-05	6590	0.0272032	0.12744	19	1.58336	5115.38	1957.23	0.382617	7455	5005	7079	6821	7407	4912	5641	5250	2250	2204	4299	3446	5486	4327	7840	7735	5447.31
unknown613	0.0299489	0.111687	24	15	4754.23	0.0547528	0.898568	20	12	30195	0.0121561	0.0762526	22	13.475	16734.5	17687.3	1.05694	10475	9311	12740	10760	14731	8716	13378	9616	27015	21101	42786	29878	11087	8395	15035	15117	16258.8
unknown749	0.0299489	0.111687	18	3	2531.44	0.544204	1	26.9725	6.63e-05	16684	0.0833936	0.267455	22.4862	1.87388	17436.6	9715.06	0.557166	13397	13249	22056	18034	12022	14380	13362	15914	5783	6221	26512	10908	26469	14555	36239	34362	17716.4
unknown786	0.0299489	0.111687	18	12	1960.1	0.0343251	0.898568	20	12	7651.75	0.00810078	0.0627173	19	12.0333	5409.35	2380.59	0.440087	4259	3470	4473	4266	5850	3911	4968	3959	7152	6707	8349	8399	3931	3844	4509	4003	5128.12
unknown814	0.0299489	0.111687	24	15	2632.2	0.0588161	0.898568	20	12	26324.2	0.0129321	0.0793238	22	13.475	10942.5	20433.7	1.86736	4915	3608	5166	4267	6258	4175	8030	3989	19091	16005	41143	29058	5075	4680	5768	5060	10393
unknown921	0.0299489	0.111687	18	12	941.336	0.34924	1	27.3065	12	6088.75	0.0581568	0.207241	22.6533	12.5286	4014.25	3535.06	0.880628	7607	2149	2009	5917	4578	2137	7171	5511	7174	5678	6133	5370	166	128	166	352	3890.38
unknown923	0.0299489	0.111687	18	15	1909.54	0.973147	1	20	12	9458.25	0.132185	0.379685	19	13.6167	6676.94	3659.73	0.548114	8287	6638	9565	6519	7160	2825	4870	4859	7472	8710	13406	8245	3225	1179	5700	7604	6641.5
unknown951	0.0299489	0.111687	18	15	1661.35	0.162411	1	20	12	7338.75	0.0307693	0.138154	19	13.6167	3071.95	3995.77	1.30073	2781	849	1889	1782	2063	836	1598	1168	6041	4083	13350	5881	1375	803	2225	1808	3033.25
unknown978	0.0299489	0.111687	24	0	2679.23	0.625283	1	20	4.82e-05	4636.49	0.0932173	0.29351	22	2.65e-05	3051.22	2900.58	0.950632	3479	2497	7288	5282	6607	1470	0	1544	233	369	1516	169	1979	1567	9198	9260	3278.62
unknown983	0.0299489	0.111687	24	15	6062.73	0.0454053	0.898568	20	12	95961.2	0.0103353	0.0701266	22	13.475	37596	77790.4	2.06912	13945	13604	15067	14425	19397	12219	17746	12064	81464	64133	151287	86961	16822	12329	18249	18350	35503.9
unknown986	0.0299489	0.111687	18	15	48726.4	0.0857848	0.898568	20	12	162281	0.0178921	0.0982097	19	13.6167	55702.7	97044.1	1.74218	19886	18336	21248	21603	21569	13046	20950	11881	121247	92627	288246	147005	18557	18551	22502	18953	54762.9
CL 64:4|CL 16:1_16:1_16:1_16:1	0.0419656	0.138345	18	0	14489	0.689251	1	28	12	23118.5	0.131407	0.378217	23	4.92857	25834.9	12815.7	0.496061	44406	26822	48762	40865	34558	11356	15629	16242	18023	16680	38321	19450	20413	11431	30570	24058	26099.1
Cer 32:1;2O|Cer 14:1;2O/18:0	0.0419656	0.138345	18	6	777.11	0.18109	1	20	6.00001	3492.75	0.0446829	0.176297	19	6.01667	2657.04	645.069	0.242777	3012	2445	2890	2857	5623	2590	3086	2672	1211	1238	1117	1136	2925	2310	3230	2920	2578.88
Cer 34:3;2O|Cer 14:2;2O/20:1	0.0419656	0.138345	18	15	10406.5	0.942685	1	20	12	75860.8	0.167337	0.450512	19	13.6167	59735.2	20114	0.33672	75326	50836	65042	67662	57365	37531	60993	48685	74718	66647	96807	65271	40070	33916	58102	53675	59540.4
Cer 36:2;3O|Cer 15:1;2O/21:1;O	0.0419656	0.138345	18	15	30953.2	0.312509	1	20	12	211913	0.0699538	0.234748	19	13.6167	141579	69111.6	0.488147	147463	101236	131863	126638	133302	86357	123711	105371	181051	150828	317309	198464	102162	79014	137943	131851	140910
Cer 38:0;3O|Cer 16:0;2O/22:0;(2OH)	0.0419656	0.138345	24	15	752.892	0.237172	1	20	12	4608	0.0558354	0.20272	22	13.475	3400.35	1507.4	0.443308	3270	2290	2497	2579	4825	1719	2879	2922	4884	3996	5480	4072	3100	2242	3584	3418	3359.81
LPI 18:0	0.0419656	0.138345	18	3	1711.55	0.90988	1	20	6	4905.5	0.162867	0.441056	19	4.43333	3866.41	2659.99	0.687974	4287	519	3595	4508	8705	3251	3569	4097	896	1041	1950	1693	6253	4054	6588	6290	3831
LPI 18:3	0.0419656	0.138345	24	12	1394.06	0.146634	1	24.0327	12	2477.25	0.0374798	0.157865	24.0163	12	1496.32	1621.62	1.08374	1295	29	252	758	2437	664	4348	2316	3516	2348	1216	2829	357	453	250	887	1497.19
NAPhe 14:1	0.0419656	0.138345	18	15	12873.9	0.919842	1	20	12	32125.2	0.164229	0.443676	19	13.6167	22366	15568.8	0.696091	26203	10745	18009	54413	16741	5682	10460	7938	26086	26835	44229	31351	11478	7973	26734	30567	22215.2
PC 38:6 Isomer C	0.0419656	0.138345	24	6	12545.1	0.268084	1	22.9091	6.00001	48228.2	0.0617345	0.215208	23.4545	6.00325	33531.5	13725.9	0.409343	33028	35065	32312	34157	49798	49771	45668	47676	48317	46637	13330	16551	41052	10838	15062	13374	33289.8
PC O-32:0	0.0419656	0.138345	24	15	1301.43	0.142908	1	20	12	8828.25	0.0366818	0.155379	22	13.475	4655.15	5466.95	1.17439	3228	2441	2911	2735	3529	2296	2899	3000	5927	5512	14960	8914	2787	2298	4452	4241	4508.12
PEtOH 34:3|PEtOH 16:1_18:2	0.0419656	0.138345	24	15	1464.06	0.126288	1	20	12	7983.25	0.033071	0.145292	22	13.475	4966.25	3904.03	0.786113	3497	4001	3532	3180	4702	2254	2925	4894	6173	7142	11930	6688	4356	2552	5558	4396	4861.25
PI 30:1|PI 14:0_16:1	0.0419656	0.138345	18	15	2604.98	0.19967	1	20	12	15187.8	0.0484488	0.18404	19	13.6167	9059.65	5965.41	0.65846	7846	5253	9054	7347	9500	4653	5007	5592	11430	11846	23909	13566	7585	4867	9150	7425	9001.88
PI 34:3|PI 16:1_18:2	0.0419656	0.138345	18	15	25123.7	0.0903415	0.898568	20	12	167488	0.0249276	0.121131	19	13.6167	97393.8	63996.7	0.657092	70943	57353	85145	71363	100545	50751	50962	69753	129385	136128	246765	157674	84632	55530	102341	79114	96774
TG 40:2|TG 12:0_14:1_14:1	0.0419656	0.138345	18	15	37367.6	0.947332	1	20	12	159312	0.167967	0.450895	19	13.6167	106447	68311.5	0.641741	133606	108568	152911	102111	111933	39811	75170	67469	119878	151436	234485	131447	39332	14099	84418	125896	105786
unknown1000	0.0419656	0.138345	24	3	663.443	0.147445	1	20	6	4933.25	0.0376529	0.158297	22	4.675	4133.13	995.835	0.24094	4334	4388	4389	3948	5166	4820	3748	5999	3593	3161	3083	2964	3832	4885	3641	3690	4102.56
unknown1020	0.0419656	0.138345	18	3	1172.91	0.807091	1	20	6.00001	3330	0.148528	0.414732	19	4.43334	2737.17	1839.3	0.671972	3026	1580	2734	2952	5422	2221	2847	2830	617	545	1369	631	2864	1710	6253	5802	2712.69
unknown1034	0.0419656	0.138345	18	12	1011.69	0.178605	1	20	12	3432	0.0441733	0.175129	19	12.0333	2113.89	1396.3	0.660536	1470	1064	1640	1746	1955	760	2206	1303	3071	2337	4138	4182	628	613	1356	2714	1948.94
unknown1148	0.0419656	0.138345	24	15	830.85	0.0595294	0.898568	20	12	4831	0.0174678	0.0965891	22	13.475	3070.74	2395.48	0.7801	2352	2303	3694	1848	2477	1390	2700	2000	5237	4288	5593	4206	2209	2479	2784	2541	3006.31
unknown1184	0.0419656	0.138345	24	9	3211.5	0.540642	1	26.9725	6.00001	6453.75	0.108584	0.32721	25.4862	7.61337	4613.14	2477.52	0.537058	10458	1970	1844	6662	6763	2226	10492	6334	8840	7007	5925	3918	1197	1175	575	948	4770.88
unknown1238	0.0419656	0.138345	18	15	2635.03	0.0922291	0.898568	20	12	11650	0.0253684	0.122485	19	13.6167	5425.28	5856.33	1.07945	3183	2251	5037	3606	3419	1573	3761	2584	9254	10489	18814	8043	3747	2048	4142	3946	5368.56
unknown1308	0.0419656	0.138345	18	15	5259.11	0.0539801	0.898568	20	12	27261.8	0.0160611	0.0917487	19	13.6167	15474.7	11081.5	0.716104	13340	10197	13964	11471	15483	7549	9592	11501	23296	24136	34639	26976	11402	8012	14425	9895	15367.4
unknown1353	0.0419656	0.138345	18	12	5246.91	0.0154116	0.898568	20	12	10261.8	0.00539623	0.0504773	19	12.0333	4781.05	5655.04	1.1828	1595	1709	2226	2040	2975	1638	2644	1870	10715	10012	11243	9077	1941	1585	2514	2024	4113
unknown1369	0.0419656	0.138345	24	15	723.193	0.0484613	0.898568	20	12	10326.2	0.0146384	0.0855814	22	13.475	3932.32	8524.39	2.16778	1299	1240	1462	1491	2040	1012	1919	1117	8554	6681	16509	9561	2033	1647	1339	1345	3703.06
unknown1389	0.0419656	0.138345	24	15	1822.92	0.0840393	0.898568	20	12	20398	0.0234437	0.116183	22	13.475	7634.73	16961.5	2.22162	2547	2035	2442	2559	4400	1730	3316	2057	14647	11483	36025	19437	3099	1689	4404	2987	7178.56
unknown1426	0.0419656	0.138345	24	12	1446.56	0.021131	0.898568	20	12	8937.75	0.00711897	0.0579121	22	12.1	3534.42	5411.29	1.53102	805	940	1060	1370	3083	778	1458	1000	9238	8809	11139	6565	1784	746	1551	1117	3215.19
unknown16	0.0419656	0.138345	18	3	39932.1	0.634346	1	20	5.51e-05	125772	0.123149	0.362268	19	1.58336	109078	52845.8	0.484476	130554	99239	135694	137601	179385	85744	105624	110971	24542	33395	117476	67630	142842	91057	220215	206682	118041
unknown1657	0.0419656	0.138345	24	15	1775.55	0.0573452	0.898568	20	12	19456.8	0.0169168	0.0942545	22	13.475	6375.92	17382.2	2.72622	707	900	943	1235	3349	583	1943	873	16328	13886	33729	13884	2462	719	1904	1090	5908.44
unknown1672	0.0419656	0.138345	18	12	7754.66	0.955953	1	28	12	37299.8	0.169132	0.452564	23	12.5952	21846.5	22404.4	1.02554	47723	17641	13687	31099	19733	8287	32815	19188	57382	58483	21567	11767	166	236	20	479	21267.1
unknown1682	0.0419656	0.138345	18	6	3442.73	0.826185	1	20	6	8533	0.151231	0.419671	19	6.01667	6000.62	2311.07	0.385138	9599	1688	5941	3262	13676	4470	7344	8642	168	154	3927	147	6676	2722	8558	14555	5720.56
unknown1698	0.0419656	0.138345	24	21	1071.97	0.461008	1	23.0287	17.9999	3171.99	0.095673	0.2979	23.5144	19.4773	2169.82	1352.41	0.623281	2780	1339	2343	5619	1446	490	1069	571	1124	1602	2396	1710	1989	1443	5036	4220	2198.56
unknown1703	0.0419656	0.138345	24	15	2373.05	0.3269	1	23.2718	12	9285	0.0725575	0.240964	23.6359	13.4801	5665.26	4449.76	0.785448	2548	1534	3708	1408	6079	2566	5774	6413	6384	4775	14763	11218	3107	2146	7970	9805	5637.38
unknown256	0.0419656	0.138345	18	6	2091.8	0.80501	1	20	6	6572.75	0.148232	0.414422	19	6.01667	5314.92	1091.19	0.205308	6414	2745	4702	5449	10936	4151	5416	5788	985	864	2363	1061	5606	3443	12344	10656	5182.69
unknown267	0.0419656	0.138345	18	15	3169.96	0.576398	1	20	12	19715.2	0.114217	0.341888	19	13.6167	14130.8	6166.03	0.436354	14215	11375	15858	13730	14444	8420	10606	10234	16305	13418	28726	20412	10691	7933	15869	12901	14071.1
unknown318	0.0419656	0.138345	18	15	2275.12	0.770946	1	20	12	13935	0.143358	0.40483	19	13.6167	10326.4	4200.32	0.406754	12047	8740	11371	9871	10283	6419	7869	7958	10891	9984	20410	14455	7951	5195	10521	10607	10285.8
unknown37	0.0419656	0.138345	18	6	1582.86	0.287474	1	20	5.99998	5047.5	0.0653572	0.223989	19	6.01666	4061.26	689.679	0.169819	4832	3211	4256	4744	7141	3659	4279	5111	841	487	1220	1173	4230	3309	8067	7083	3977.69
unknown370	0.0419656	0.138345	18	15	18561.9	0.197319	1	20	12	103170	0.0479766	0.183176	19	13.6167	68153.5	35124.3	0.515371	68292	46065	64266	59437	66297	33751	51849	48387	85377	78664	143958	104680	49526	37246	74177	73042	67813.4
unknown397	0.0419656	0.138345	18	15	1472.73	0.798982	1	20	12	11690.2	0.147374	0.413568	19	13.6167	9284.43	2877.92	0.309973	11390	8287	9286	9704	8894	6378	9308	7084	10970	10659	14603	10529	6722	5576	9968	8747	9256.56
unknown45	0.0419656	0.138345	24	12	1823.63	0.289056	1	24.1644	12	13595.8	0.0656502	0.223989	24.0822	12.0001	11705.5	2304.81	0.196899	11378	7854	8686	11015	14721	10397	12055	12256	13097	11266	15502	14518	10607	9316	11796	12924	11711.8
unknown467	0.0419656	0.138345	18	15	28126.6	0.186142	1	20	12	176558	0.0457144	0.178148	19	13.6167	117336	58576.7	0.499221	113511	80423	111251	100006	113281	63392	87192	85499	151523	128389	247114	179206	89458	65640	128429	123988	116769
unknown471	0.0419656	0.138345	24	3	1073.39	0.137063	1	28	6.63e-05	7808.74	0.0354215	0.152049	26	1.62503	5905.69	551.54	0.0933912	8758	6511	7722	8244	6631	4560	6026	4941	5562	4535	4906	5275	4815	3920	5852	6066	5895.25
unknown479	0.0419656	0.138345	18	3	1216.22	0.574086	1	26.6465	6.98e-05	5229.24	0.113855	0.341262	22.3233	1.8603	5295.76	4523.44	0.854163	2837	5306	9188	3586	6899	3464	1842	3615	628	814	6171	3441	8467	3907	13011	13960	5446
unknown500	0.0419656	0.138345	18	3	1513.56	0.518474	1	23.2718	4.22e-05	5875.74	0.105043	0.319109	20.6359	1.71968	4488.03	2712.16	0.60431	4702	5281	8285	5235	6560	3063	2672	3280	1074	762	5464	2627	5575	2916	9330	9025	4740.69
unknown504	0.0419656	0.138345	18	15	19570.8	0.670837	1	20	12	141024	0.128659	0.371258	19	13.6167	102854	42079.5	0.40912	111369	88092	105213	97019	98025	59669	83198	83000	112040	100444	212722	138888	74828	53547	110994	110089	102446
unknown527	0.0419656	0.138345	18	6	1378.5	0.909151	1	20	6	6029.25	0.162767	0.441056	19	6.01667	4933.68	1053.15	0.21346	4694	3328	5122	4040	8369	4144	5725	5879	1562	1592	3946	2378	4664	3283	9522	8649	4806.06
unknown540	0.0419656	0.138345	18	15	1852.97	0.279961	1	20	12	12329.8	0.0639601	0.220908	19	13.6167	8207.9	4113.99	0.501223	7736	6617	7229	7392	8124	4218	6854	5591	9696	8834	18041	12748	5896	4522	8256	8935	8168.06
unknown589	0.0419656	0.138345	24	15	1116.17	0.329891	1	20.6557	12	6652.25	0.0730952	0.242149	22.3279	13.4632	4400.77	2755.39	0.626115	3315	1961	3319	2774	5139	2979	3379	3253	4612	3996	10758	7243	3741	2585	5519	4775	4334.25
unknown608	0.0419656	0.138345	18	3	2068.29	0.0683409	0.898568	20	6	3824	0.0196575	0.104083	19	4.43333	3093.9	2133.15	0.68947	3902	3073	3758	3964	5080	3255	3280	3681	170	208	1061	308	3676	3168	5199	5265	3065.5
unknown631	0.0419656	0.138345	24	12	1793.58	0.414109	1	24.8451	12	7281.75	0.0878045	0.279604	24.4225	12.0036	4660.22	2633.38	0.565076	2036	1066	1724	2289	7430	2606	4609	4589	4023	3982	12634	8488	3615	1895	6967	7198	4696.94
unknown65	0.0419656	0.138345	18	6	4874.44	0.712293	1	20	6	21782.2	0.134817	0.385069	19	6.01667	18962.4	2258.63	0.119111	20950	14010	18776	19778	31619	15604	18885	21021	6931	6957	14785	7623	19890	15284	35855	31051	18688.7
unknown676	0.0419656	0.138345	18	15	1332.54	0.159546	1	20	12	8010.75	0.040215	0.163645	19	13.6167	5169.21	2783.83	0.538541	5426	4173	4143	5009	4943	3180	4660	3775	7100	6241	10551	8151	3649	2637	4390	4248	5142.25
unknown701	0.0419656	0.138345	18	15	1613.44	0.186763	1	20	12	10998.8	0.0458409	0.178148	19	13.6167	6404.38	4337.61	0.677288	5714	4264	4939	5634	5489	3828	4526	4615	8482	6880	16761	11872	4228	2706	6011	5849	6362.38
unknown716	0.0419656	0.138345	18	15	1945.25	0.38613	1	20	12	11262.5	0.0830056	0.266592	19	13.6167	7467.56	4027.46	0.539327	5738	5749	8329	7045	6895	3705	4536	5348	7600	8073	17568	11809	4251	6280	6562	9369	7428.56
unknown746	0.0419656	0.138345	18	6	1364.36	0.994152	1	20	6	5154.75	0.174256	0.463803	19	6.01667	4092.68	1198.54	0.292851	3748	2129	2938	3151	6704	3654	5249	5012	2271	1511	3589	2536	4081	2903	6836	6847	3947.44
unknown759	0.0419656	0.138345	18	15	777.641	0.140512	1	20	12	5987.75	0.0361665	0.153776	19	13.6167	4188.94	1736.02	0.414429	4084	2984	4007	3535	4063	2969	3114	3206	5940	4100	7763	6148	3449	2917	4546	3929	4172.12
unknown809	0.0419656	0.138345	18	12	2227.03	0.529596	1	27.3065	12	23811	0.106825	0.323209	22.6533	12.5286	16072.6	13618.1	0.847282	35350	7056	6006	22388	18285	7614	32660	20963	33072	24743	20804	16625	769	950	667	1575	15595.4
unknown816	0.0419656	0.138345	18	12	2449.42	0.132604	1	20	12	11206	0.0344533	0.149899	19	12.0333	7240.22	4176.74	0.57688	6204	3471	6448	4348	7390	4466	5456	5464	8773	7849	15625	12577	3849	3786	6340	5903	6746.81
unknown83	0.0419656	0.138345	18	6	5122.81	0.620609	1	20	5.99998	23758	0.121052	0.357662	19	6.01666	20766.1	2103.16	0.101279	32071	17117	19205	16738	34132	17166	21907	21827	10198	8958	15939	8719	24440	16821	27605	35337	20511.2
unknown843	0.0419656	0.138345	18	6	939.922	0.491402	1	20	6	4186	0.100664	0.308731	19	6.01667	3614.58	447.86	0.123904	4102	3144	3652	3451	5453	3312	4408	3571	1582	1756	2668	1851	3806	2934	5335	5940	3560.31
unknown875	0.0419656	0.138345	24	9	1830.88	0.464752	1	27.3065	5.99999	5715	0.0962923	0.299413	25.6533	7.62835	4416.22	1581.69	0.358156	8146	2929	3006	5812	5570	3165	7938	6187	7489	6136	4545	3596	2240	1634	1604	2454	4528.19
unknown877	0.0419656	0.138345	18	15	1794.99	0.490236	1	20	12	9222.5	0.100474	0.308652	19	13.6167	5498.99	3890.88	0.707562	4548	3646	7137	4879	4047	2684	4100	3981	6497	8133	15718	6542	2622	2152	5095	5600	5461.31
unknown930	0.0419656	0.138345	24	6	921.36	0.0989916	0.922865	20	6	5169	0.0269346	0.126767	22	6.05	4195.49	617.455	0.147171	4813	4123	3664	4964	4603	4889	5050	6134	3734	3791	2711	3139	3731	4608	3393	3168	4157.19
unknown940	0.0419656	0.138345	18	15	4322.37	0.156652	1	20	12	19070.8	0.0396058	0.163521	19	13.6167	7607.54	10536.5	1.385	5232	3292	4117	3393	5076	2566	3927	2066	13159	10226	35420	17478	3429	2470	4848	3389	7505.5
unknown950	0.0419656	0.138345	18	3	3229	0.159316	1	20	6	5977.75	0.0401667	0.163645	19	4.43333	4859.17	3411.94	0.702165	6665	4103	5949	5958	9125	4504	5333	4949	353	412	1239	565	5994	3882	9048	8941	4813.75
unknown996	0.0419656	0.138345	18	6	8542.56	0.644149	1	20	6	52778	0.124638	0.364813	19	6.01667	45194.5	7957.96	0.176083	33270	39061	53117	35923	61184	51153	42814	55961	39895	37881	41470	38104	43900	47908	43477	42564	44230.1

## Sheet: uni cycling suagrAM in sugarAS
CycID	JTK_pvalue	JTK_BH.Q	JTK_period	JTK_adjphase	JTK_amplitude	LS_pvalue	LS_BH.Q	LS_period	LS_adjphase	LS_amplitude	meta2d_pvalue	meta2d_BH.Q	meta2d_period	meta2d_phase	meta2d_Base	meta2d_AMP	meta2d_rAMP	0	0.1	0.2	0.3	6	6.1	6.2	6.3	12	12.1	12.2	12.3	18	18.1	18.2	18.3	SugarS
CAR 18:0	0.0579045	0.13655	18	9	3401.36	0.182411	0.900865	20	6	23840.8	0.0586263	0.213999	19	7.6	13373	7232.92	0.540859	4797	3828	6129	19898	10178	36104	24824	24257	6994	8535	7510	6750	7634	8944	7872	6965	11951.2
CL 64:4|CL 16:1_16:1_16:1_16:1	0.0579045	0.13655	18	9	7385.73	0.782497	1	20	6	36380	0.18551	0.328446	19	7.6	27505.2	8088.46	0.29407	15296	14702	18997	21129	31606	58296	29909	25709	30404	23767	26190	17810	30820	28142	23961	17905	25915.2
Cer 32:1;2O|Cer 14:1;2O/18:0	0.0579045	0.13655	18	6	1268.55	0.23173	0.900865	20	5.99999	2934.75	0.071266	0.228234	19	6.01666	1641.09	1234.97	0.752528	571	943	623	2947	1119	4453	3574	2593	934	823	782	733	1077	1037	755	899	1491.44
Cer 33:1;4O|Cer 15:1;3O/18:0;(2OH)	0.0579045	0.13655	24	18	31546.3	0.783882	1	26.8085	17.9999	330751	0.185758	0.328626	25.4043	18.0551	294612	18181	0.0617117	272903	317472	286608	193509	383614	280215	207984	190647	314526	307583	324701	299502	339311	336025	324592	323076	293892
Cer 35:1;4O|Cer 13:1;3O/22:0;(2OH)	0.0579045	0.13655	24	18	42674.6	0.592186	0.993616	26.3284	17.9999	243291	0.149948	0.300647	25.1642	18.0386	204322	20004.4	0.0979063	187649	209933	200774	104115	283732	176555	117964	109065	239404	206353	246021	203637	246774	244446	239916	242029	203648
Cer 35:2;3O|Cer 17:1;2O/18:1;(3OH)	0.0579045	0.13655	24	18	3847.01	0.770042	1	23.3952	17.9999	17586.5	0.183273	0.325254	23.6976	18.0029	13446.8	2512.18	0.186824	12184	14657	14531	2716	26067	4759	2815	2599	17113	15855	17719	14198	17434	18841	16951	17120	13472.4
Cer 38:0;2O	0.0579045	0.13655	18	6	6609.68	0.153987	0.900865	20	6	15612.2	0.0510012	0.20446	19	6.01667	7885.9	7639.12	0.968707	2057	2721	2530	11981	5848	23993	18681	13927	4388	3298	3115	2809	4030	4633	3427	3925	6960.19
FA 20:0 (arachidic acid)	0.0579045	0.13655	18	6	117945	0.102318	0.900865	20	6	366839	0.03631	0.183249	19	6.01667	237025	132814	0.560339	114866	139992	133816	289562	271800	452565	389704	353288	175380	143774	163621	155328	190853	216239	152206	191896	220931
GlcCerd14:14E/20:02OH	0.0579045	0.13655	18	9	559.675	0.197707	0.900865	20	6	7414	0.0626204	0.215955	19	7.6	4037.86	2195.92	0.543832	1322	1953	1663	7046	2343	11292	7783	8238	2096	1758	1996	2131	2338	1997	1820	1923	3606.19
HexCer 36:2;2O	0.0579045	0.13655	18	9	359.564	0.965529	1	20	5.99999	2047	0.217151	0.358458	19	7.6	1748.77	301.815	0.172587	1199	1430	1252	1223	2354	2638	1500	1696	1743	2006	1628	1306	2204	1740	1522	1590	1689.44
PC O-32:0	0.0579045	0.13655	24	18	3945.13	0.348623	0.900865	26.3284	17.9999	12314.2	0.0989705	0.255708	25.1642	18.0386	9362.03	1054.82	0.11267	6308	5864	9989	4264	14993	4687	3878	4276	13529	11553	10480	10146	13790	15098	10737	9632	9326.5
PC P-38:3 or PC O-38:4 Isomer A	0.0579045	0.13655	24	18	8290.3	0.393456	0.908997	24.1644	17.9999	24081	0.108942	0.265085	24.0822	18.0002	17953.3	2604.51	0.145071	14022	11207	21555	3954	31494	7014	4961	4262	24305	22966	22703	22375	25180	25234	21009	24901	17946.4
PE 30:1|PE 14:0_16:1	0.0579045	0.13655	18	9	16148.2	0.459404	0.930091	20	6	87408.2	0.12308	0.275996	19	7.6	62598.2	20556.7	0.328391	32040	30248	40944	62339	55258	125422	90198	78755	64040	54618	48743	41550	66782	62259	49989	33731	58557.2
PE 34:1	0.0579045	0.13655	18	9	41921.9	0.224584	0.900865	20	6	488170	0.0694758	0.225859	19	7.6	380865	76830.2	0.201726	249027	304948	278524	433242	421988	614846	479564	436280	338516	313867	334864	297565	385736	357809	311280	294128	365762
PE P-38:2 or PE O-38:3	0.0579045	0.13655	24	18	3660.34	0.45463	0.926663	22.5575	17.9999	10953.7	0.122076	0.275788	23.2788	18.0173	7997.69	1679.41	0.209987	7838	7730	7755	948	14739	1529	936	890	11997	10044	11575	8852	12682	11407	9168	10558	8040.5
PI 36:1	0.0579045	0.13655	18	6	106617	0.194655	0.900865	20	6.00001	247058	0.0618292	0.215873	19	6.01667	148471	97147.1	0.654317	62333	74112	74308	230822	122382	356461	255630	253759	94437	92761	94935	79645	108266	107192	95115	85019	136699
PI 38:1|PI 20:0_18:1	0.0579045	0.13655	18	6	5632.11	0.258643	0.900865	20	6.00001	11688.2	0.0778974	0.236005	19	6.01667	6426.08	5119.63	0.796694	2318	3009	2439	10564	3712	18791	12843	11407	3157	3021	3378	2728	5059	3911	3516	3038	5805.69
TG 36:0|TG 12:0_12:0_12:0	0.0579045	0.13655	24	18	1.33593e+06	0.309877	0.900865	22.5575	12	4.38015e+06	0.090085	0.243957	23.2788	14.9214	3.39146e+06	1.59167e+06	0.469316	3293789	3568306	3061721	572913	4240160	2770823	1051135	741350	5229742	4655500	4334302	3301075	5056031	5178887	3895515	3335615	3392929
unknown1009	0.0579045	0.13655	18	6	4610.69	0.560672	0.974375	20	6	15652.8	0.143743	0.295738	19	6.01667	11067.4	5288.68	0.477862	4214	3905	7018	11673	11880	20102	16436	14193	11499	10314	7073	7203	12798	12476	8757	7283	10426.5
unknown1035	0.0579045	0.13655	24	18	1237.44	0.699666	1	28	17.9999	7556.74	0.170406	0.315902	26	18.1071	6122.1	553.316	0.0903801	5485	6002	5942	3172	8973	5752	3538	3272	5272	6501	7258	6089	7708	7793	7376	7350	6092.69
unknown1107	0.0579045	0.13655	18	9	820.951	0.207143	0.900865	20	6.00001	12748.2	0.0650499	0.221021	19	7.6	7758.37	3259.79	0.420164	3835	4775	3552	12652	5387	17908	12806	14892	4789	4763	4869	4622	5877	4592	3907	4655	7117.56
unknown1114	0.0579045	0.13655	18	9	4681.4	0.625182	1	20	6.00001	38722.2	0.15634	0.306936	19	7.60001	31513.4	5555.61	0.176293	20204	24999	22246	32497	36580	49599	37185	31525	27769	29370	28961	24708	34145	34381	26748	25824	30421.3
unknown1180	0.0579045	0.13655	24	18	2746.76	0.502702	0.953987	27.3065	17.9999	11729.5	0.132058	0.284794	25.6533	18.075	9359.38	985.167	0.10526	7606	9361	8396	3926	14436	6764	4565	4341	12392	10890	11024	8414	11274	13281	11351	11012	9314.56
unknown1238	0.0579045	0.13655	24	15	3126.12	0.420224	0.911742	23.0287	12	12950	0.114752	0.270269	23.5144	13.4748	10054.3	2794.44	0.277933	9126	10194	8558	1983	12720	10987	4062	2755	15035	13067	12891	10807	14054	13865	11399	8997	10031.2
unknown1244	0.0579045	0.13655	18	9	701.45	0.238527	0.900865	20	6	5974	0.0729571	0.228348	19	7.6	3175.03	1918.3	0.604182	854	931	1066	4895	1657	9078	7296	5865	1868	1581	1379	1444	1801	2813	1261	978	2797.94
unknown1254	0.0579045	0.13655	18	6	2882.17	0.271907	0.900865	20	5.99999	6167.25	0.0811046	0.238219	19	6.01666	3662.07	2408.12	0.657586	1442	1980	1460	6586	2939	9181	6587	5962	2235	2099	1767	1666	2612	3228	1922	2258	3370.25
unknown1359	0.0579045	0.13655	18	6	17290.9	0.262983	0.900865	20	5.99998	30775.8	0.0789509	0.237155	19	6.01666	15361.8	14492.2	0.943392	3901	5245	3495	34080	7523	49686	36378	29516	5748	5910	4510	4768	7641	7722	5928	5639	13605.6
unknown1414	0.0579045	0.13655	24	18	19312.1	0.428889	0.916833	22.4427	18	75267.5	0.116611	0.272701	23.2214	18.0202	55630.2	12785	0.229821	51545	55674	63308	11257	94994	17716	7814	8685	75628	72620	74791	60646	76453	85075	69879	69663	55984.2
unknown1428	0.0579045	0.13655	18	6	1155.94	0.157545	0.900865	20	6	3985	0.0519713	0.20772	19	6.01667	2768.48	1208.25	0.436432	1622	2183	1713	3532	2799	5396	3933	3812	2112	1965	2187	1875	2401	2381	2033	2009	2622.06
unknown1435	0.0579045	0.13655	18	9	1767.59	0.196429	0.900865	20	6	14943	0.0622895	0.215955	19	7.6	10258.5	3520.09	0.34314	5733	6189	6508	11981	10889	21393	14172	13318	9817	6908	8305	6870	9161	9309	6945	5566	9566.5
unknown1465	0.0579045	0.13655	18	6	6936.36	0.0677293	0.900865	20	6	19410.2	0.0256535	0.174973	19	6.01666	12916.8	6869.07	0.531795	6292	7633	8726	12823	18163	21837	18698	18943	7693	8316	11314	11750	8394	9033	10455	13280	12084.4
unknown1476	0.0579045	0.13655	18	6	5931.92	0.0743937	0.900865	20	6	18238.2	0.0277734	0.177639	19	6.01667	10217.2	8066.33	0.789484	3186	5198	5136	12918	10281	21391	19069	22212	5259	4664	6529	7018	5367	5733	6729	7146	9239.75
unknown1514	0.0579045	0.13655	18	6	1169.2	0.215869	0.900865	20	6	4286	0.0672746	0.224249	19	6.01667	3131.52	1175.09	0.375244	1904	2337	2269	3722	3642	5218	4320	3964	1962	1765	3100	3072	2106	2390	2488	3567	2989.12
unknown16	0.0579045	0.13655	18	9	43640.2	0.271367	0.900865	20	5.99998	228758	0.0809749	0.238219	19	7.59999	155942	56851.3	0.364568	68298	69817	102659	164476	148456	311780	242761	212036	140496	123550	114653	106083	159707	147697	107680	96105	144766
unknown1615	0.0579045	0.13655	18	9	473.408	0.0892092	0.900865	20	6	2638.25	0.0323664	0.181473	19	7.6	1278.57	937.331	0.733108	349	341	333	1683	1170	3574	2284	3525	667	388	525	449	541	528	499	653	1094.31
unknown1630	0.0579045	0.13655	18	6	7767.57	0.700037	1	20	6	36848.5	0.170475	0.315902	19	6.01667	28953.1	9145.63	0.315878	16902	22089	20929	25072	48280	38557	27215	33342	16493	24791	29954	29189	25856	26122	29838	30888	27844.8
unknown280	0.0579045	0.13655	18	9	3119.76	0.217538	0.900865	20	6.00001	36954.5	0.0676975	0.224249	19	7.6	19984.1	11257.8	0.563338	6029	7148	7666	33765	10516	53924	45351	38027	10366	9823	10084	9149	11112	12887	9655	8835	17771.1
unknown307	0.0579045	0.13655	18	9	1186.88	0.273527	0.900865	20	6	9669	0.0814938	0.238219	19	7.6	5633.51	2791.56	0.495528	2148	2355	2420	8267	3251	14731	11175	9519	4547	2790	3175	2888	4219	4071	3027	2773	5084.75
unknown312	0.0579045	0.13655	18	9	3475.78	0.231462	0.900865	20	6	16494.5	0.0711992	0.228234	19	7.6	9499.55	5332.13	0.561303	3382	2810	4944	10583	6283	26330	17744	15621	8175	5853	5786	4978	7830	6676	4643	3584	8451.38
unknown332	0.0579045	0.13655	18	6	1032.38	0.260579	0.900865	20	6	4766.75	0.0783679	0.236815	19	6.01667	3677.7	1103.28	0.299991	2468	2739	2971	4387	3544	5846	5220	4457	3310	3017	2996	2567	3645	3488	3060	2989	3544
unknown500	0.0579045	0.13655	18	9	2073.06	0.507784	0.957437	20	6	10400.5	0.133097	0.285474	19	7.6	6906.47	2927.13	0.423825	2981	2564	4184	6400	5533	17280	9986	8803	7417	5613	4930	4150	6739	7070	4702	2945	6331.06
unknown554	0.0579045	0.13655	18	6	2395.68	0.360894	0.900865	20	6.00001	6697.5	0.101731	0.258356	19	6.01667	3473.65	3157.66	0.909034	1051	1208	1114	5718	2003	12347	7881	4559	1012	2057	1544	1125	1768	2193	2028	1848	3091
unknown676	0.0579045	0.13655	24	18	2519.24	0.302998	0.900865	27.4766	17.9999	9796.24	0.0884791	0.24374	25.7383	18.0825	7729.3	914.224	0.11828	5862	5705	8994	3506	10671	5161	4000	4718	9445	8460	9121	8147	11569	9638	9261	8717	7685.94
unknown70	0.0579045	0.13655	18	6	4801.08	0.272613	0.900865	20	6	11714.8	0.0812744	0.238219	19	6.01667	6290.84	5472.46	0.869908	1823	1791	2132	9135	4486	19268	12994	10111	2651	3284	2983	2773	4820	5144	3644	3004	5627.69
unknown80	0.0579045	0.13655	18	9	12886.3	0.212482	0.900865	20	6	100500	0.0664134	0.222867	19	7.6	51083.3	34210.6	0.669702	13050	13208	17317	70257	28738	168063	114180	91017	26698	25740	20936	19169	27269	34539	21381	18170	44358.2
unknown808	0.0579045	0.13655	24	18	3400.83	0.261121	0.900865	23.6461	12	12144.5	0.0784994	0.236815	23.8231	14.9786	9432.43	3918.09	0.415385	7551	9749	8031	2045	12607	8566	2661	2691	13392	12936	11707	10543	13650	13779	11032	9982	9432.62
unknown814	0.0579045	0.13655	24	18	11306.3	0.381313	0.906601	23.7736	17.9999	31083.7	0.106272	0.263625	23.8868	18.0004	23228.5	3458.33	0.148883	17883	14989	28404	5177	40113	9209	6401	5019	31290	32189	29520	27335	33420	32823	28441	29651	23241.5
unknown899	0.0579045	0.13655	18	9	921.714	0.723909	1	20	6	8496.25	0.174882	0.319456	19	7.6	7446.29	893.948	0.120053	6284	6501	6273	7460	7696	8569	8121	9599	9537	4902	6748	7081	7592	7009	6362	6595	7270.56
unknown908	0.0579045	0.13655	24	18	5740.12	0.518551	0.957474	24.2975	18	17974.5	0.13529	0.286263	24.1488	18.0007	13401.7	2007.11	0.149765	10121	10785	14747	2559	25328	4847	3098	2506	18377	17920	15781	16306	21067	17892	16464	16475	13392.1
Cer 36:1;2O|Cer 14:1;2O/22:0	0.0683156	0.149527	18	6	19796.5	0.234406	0.900865	20	6	39817.8	0.0822187	0.238391	19	6.01667	20697.4	18289.5	0.883664	6480	8257	6349	39320	11927	62929	48148	36267	10146	9306	7634	7108	10958	12869	9306	8693	18481.1
HexCer 36:1;2O	0.0683156	0.149527	18	9	212.132	0.137401	0.900865	20	6.00001	2715.5	0.0532078	0.208447	19	7.6	1743.72	651.924	0.37387	997	1213	959	2428	1472	3639	2691	3060	1286	1134	1124	1177	1455	1134	1006	1074	1615.56
CAR 20:0	0.0787266	0.149527	18	6	16564.7	0.203356	0.900865	20	6	42053	0.082202	0.238391	19	6.01667	24558.5	17623.7	0.717624	9013	8450	14068	34717	19223	62809	45970	40210	15706	16587	14940	12519	17664	16286	14597	16006	22422.8
Cer 28:2;2O|Cer 16:2;2O/12:0	0.0787266	0.149527	24	18	963.963	0.296476	0.900865	23.1496	12	2731	0.111044	0.267019	23.5748	14.9508	1950.29	1101.82	0.564952	1366	1318	1994	369	2973	940	443	421	2416	1911	4294	2303	2966	2629	2296	2571	1950.62
Cer 34:0;2O|Cer 14:0;2O/20:0	0.0787266	0.149527	18	6	22616.5	0.225484	0.900865	20	5.99998	36013.2	0.0893132	0.24374	19	6.01666	17574.8	17309.6	0.98491	4928	5623	5220	37517	5957	53914	46121	38061	6733	5694	5514	5386	7265	7944	5708	6051	15477.2
Cer 34:1;2O|Cer 14:1;2O/20:0	0.0787266	0.149527	18	9	3267.19	0.203979	0.900865	20	6	22889.5	0.0824047	0.2384	19	7.6	12951.3	6968.7	0.538068	4373	5062	6001	17025	8576	35050	25869	22063	8244	8047	6783	6609	9090	9412	6997	6102	11581.4
Cer 34:1;3O|Cer 14:0;2O/20:1;O	0.0787266	0.149527	18	9	3016.34	0.20971	0.900865	20	6.00001	37164.2	0.0842626	0.240972	19	7.6	19124.8	12037.9	0.629441	6626	4884	6973	30410	9618	58391	46555	34093	9726	9371	7218	7457	9010	11828	7932	8042	16758.4
Cer 34:1;3O|Cer 14:1;2O/20:0;(2OH)	0.0787266	0.149527	18	6	56247.5	0.213846	0.900865	20	6	101662	0.0855956	0.243221	19	6.01667	51745.8	47421.7	0.916436	18488	19591	15498	99864	26080	160022	118851	101695	23931	21042	19594	17621	23631	28897	20184	20999	45999.2
Cer 35:1;2O|Cer 14:1;2O/21:0	0.0787266	0.149527	18	6	2518.18	0.239999	0.900865	20	6	7197.5	0.0938837	0.248255	19	6.01667	4476.77	2592.91	0.579192	2116	3259	2153	7303	3458	10239	8817	6276	2945	2919	2721	2248	3401	3099	2874	2773	4162.56
Cer 36:0;2O|Cer 14:0;2O/22:0	0.0787266	0.149527	18	6	28944.7	0.205086	0.900865	20	6.00001	58135	0.0827646	0.239133	19	6.01667	26181.4	30986.3	1.18352	5290	4173	6002	46852	9737	99241	69597	53965	8631	8319	5637	6546	8962	12044	7185	6642	22426.4
Cer 36:4;4O|Cer 15:3;3O/21:1;(2OH)	0.0787266	0.149527	18	6	28995.6	0.22219	0.900865	20	6.00001	54635.2	0.0882659	0.24374	19	6.01667	29049.6	24251	0.834814	11714	12920	9805	54962	16419	85824	61593	54705	14677	13107	12877	10709	15319	16885	12496	13762	26110.9
Cer d33:1	0.0787266	0.149527	18	6	1405.91	0.185949	0.900865	20	6.00001	2824.25	0.0764755	0.234226	19	6.01667	1607.9	1134.39	0.70551	794	1024	728	2856	1033	4153	3291	2820	835	781	821	819	970	943	793	866	1470.44
Cer d34:0	0.0787266	0.149527	18	6	74681.8	0.269689	0.900865	20	5.99998	109621	0.103022	0.259578	19	6.01666	52135.3	52833.1	1.01338	10446	14383	10579	135062	16824	167816	134679	119165	15604	13803	13439	13527	16719	20608	13559	15515	45733
PC 38:6 Isomer C	0.0787266	0.149527	24	3	2923.18	0.192642	0.900865	28	6.63e-05	37891.6	0.0786921	0.236815	26	1.62503	18994.8	3705.21	0.195065	47391	51404	10983	41789	13665	17313	15085	13303	11913	11251	11105	12073	13050	11174	11185	10110	18924.6
PC O-38:2|PC O-20:1_18:1	0.0787266	0.149527	24	18	1147.99	0.546796	0.968104	22.2166	17.9999	4594.5	0.178451	0.322385	23.1083	18.0268	3351.06	806.187	0.240576	3364	3238	3896	299	6403	555	152	202	4626	4457	4822	3639	4930	4590	4577	4281	3376.94
PE 32:2|PE 16:1_16:1	0.0787266	0.149527	18	9	64677.3	0.268939	0.900865	20	5.99998	404370	0.102794	0.259296	19	7.59999	271269	105614	0.389334	134858	116252	177172	289662	227463	580346	436800	372872	266748	206582	201229	175292	250263	240376	183572	148638	250508
PE 35:1|PE 19:0_16:1	0.0787266	0.149527	18	6	4491.54	0.238987	0.900865	20	6	13043	0.0935676	0.248004	19	6.01667	8220.14	4871.47	0.592627	3691	4540	4097	11476	7385	19435	13255	12097	5939	5112	5802	4940	6612	6914	5381	5401	7629.81
PE 36:1|PE 18:0_18:1	0.0787266	0.149527	18	6	110423	0.2537	0.900865	20	6	244512	0.0981345	0.255582	19	6.01667	143611	97520.5	0.679062	63142	73098	64587	241314	102726	377153	262568	235603	85635	79633	83880	68085	98784	110667	86335	75481	131793
PE P-36:1 or PE O-36:2	0.0787266	0.149527	24	18	27775.5	0.379049	0.906601	24.0327	17.9999	74976.2	0.13464	0.285976	24.0163	18	56407.5	7074.73	0.125422	42895	39667	62945	10982	97611	23320	16905	13487	81291	76244	73518	63690	84429	85322	63981	66173	56403.8
PE-Cer 34:0;2O|PE-Cer 14:0;2O/20:0	0.0787266	0.149527	18	6	17080.5	0.22984	0.900865	20	6	32469.5	0.0906923	0.244716	19	6.01667	18649.8	13232.9	0.709544	6675	9491	7543	34535	12779	45294	37245	34560	10643	10184	10087	8652	10561	14129	10687	9675	17046.2
PEtOH 36:1|PEtOH 18:0_18:1	0.0787266	0.149527	24	18	12814.2	0.561053	0.974375	24.5682	17.9999	55305.2	0.181967	0.32481	24.2841	18.0024	44780.5	4874.68	0.108857	40170	45517	42397	17504	70045	30446	20077	18947	54860	54939	54072	45589	59930	60099	48988	52204	44736.5
unknown1015	0.0787266	0.149527	24	15	2312.24	0.217836	0.900865	28	17.9999	7840.5	0.0868758	0.243487	26	16.4821	6257.81	244.294	0.0390384	4274	3734	5858	2153	8839	5981	4198	3047	8802	8120	7567	6107	8134	9711	7124	6393	6252.62
unknown1076	0.0787266	0.149527	24	18	266513	0.286248	0.900865	22.7907	12	780528	0.108005	0.264705	23.3953	14.9324	590295	296533	0.502347	540137	595964	497307	103622	714928	461356	177740	131612	1009511	829640	749979	532983	924629	983905	649647	544751	590482
unknown1080	0.0787266	0.149527	24	18	7438.41	0.263448	0.900865	22.3291	17.9999	20116.2	0.101123	0.258356	23.1646	18.0234	14783.6	3124.68	0.211361	13777	11314	17073	3421	22919	4930	2700	2460	23732	20861	18080	16300	22443	21883	19338	16801	14877
unknown1115	0.0787266	0.149527	18	6	2568.57	0.217679	0.900865	20	6.00001	4830	0.0868253	0.243487	19	6.01667	2624.55	2084.1	0.794079	1265	1130	993	4908	1516	7468	5474	4862	1512	1182	1190	1147	1318	1532	1195	1260	2372
unknown1121	0.0787266	0.149527	24	18	5784.31	0.357551	0.900865	24.1644	17.9999	15913.7	0.128647	0.280673	24.0822	18.0002	11717.8	1945.47	0.166027	10059	8591	12638	2185	18744	4876	3450	3399	19230	14414	14586	11575	17169	19513	13036	13937	11712.6
unknown1125	0.0787266	0.149527	18	9	2991.06	0.245547	0.900865	20	6	30301	0.0956122	0.251052	19	7.6	21009.1	6287.27	0.299264	10821	14243	12815	28560	19571	40344	32861	28428	16103	14980	16086	14715	20693	18396	14012	13743	19773.2
unknown1185	0.0787266	0.149527	18	9	2874.92	0.853252	1	20	5.99998	30321.5	0.248574	0.390006	19	7.59999	25983.5	3307.45	0.12729	19879	23783	19447	22852	33618	36847	26115	24706	26290	23943	23830	19952	26826	28712	24711	23822	25333.3
unknown1213	0.0787266	0.149527	24	18	1473.96	0.307991	0.900865	21.995	17.9999	6131.25	0.114433	0.270269	22.9975	18.0342	4837.44	864.643	0.17874	4903	4259	5804	1816	6608	2754	1810	1615	6262	6172	6218	5158	6894	6587	5325	5719	4869
unknown1229	0.0787266	0.149527	18	6	5573.77	0.275687	0.900865	20	6.00001	11950.8	0.104836	0.261797	19	6.01667	5934.44	5925.59	0.998509	1266	1818	1479	9826	3365	21246	12919	10273	2367	2584	2367	1669	3355	4335	2492	2101	5216.38
unknown1230	0.0787266	0.149527	24	18	23037.5	0.428224	0.916833	28	17.9999	123427	0.147994	0.298247	26	18.1071	105482	911.744	0.00864359	86725	100160	90825	62910	150569	91485	77179	63993	122491	111884	124970	110037	128856	130308	117502	117044	105434
unknown1299	0.0787266	0.149527	24	18	1737.36	0.684569	1	26.0177	17.9999	7922.75	0.211303	0.353576	25.0088	18.0293	6755.05	229.132	0.0339202	5988	5384	6783	3565	10898	5068	4056	3243	7906	8117	7230	8043	8425	8732	7211	7323	6748.25
unknown13	0.0787266	0.149527	18	9	18787.1	0.225651	0.900865	20	6	150264	0.0893661	0.24374	19	7.6	85438.7	45119.7	0.528095	29237	29549	39857	117934	56909	230534	172107	141508	54639	55962	42816	41933	60106	63652	47151	41213	76569.2
unknown1369	0.0787266	0.149527	24	18	4197.74	0.394462	0.908997	22.2166	17.9999	12317.5	0.138876	0.290452	23.1083	18.0268	9153.22	1989.26	0.217329	9553	6772	11503	1716	14817	3121	1454	1664	13440	12656	11688	9819	13928	13302	11697	10343	9217.06
unknown1377	0.0787266	0.149527	18	9	14677.8	0.832364	1	28	6.00002	86055.8	0.244113	0.38627	23	8.21429	74274.2	9083.02	0.12229	51343	57223	62316	53598	90674	104153	65512	83884	70380	68832	85594	68388	80344	80441	79613	79479	73860.9
unknown1426	0.0787266	0.149527	24	15	2474.7	0.698406	1	21.5648	12	9678.5	0.214474	0.356426	22.7824	13.4583	7233.15	2528.66	0.349594	6870	6654	7566	1179	14432	1568	1074	1485	10575	8522	10140	9477	9356	8413	7990	9661	7185.12
unknown1450	0.0787266	0.149527	24	15	6231.38	0.943639	1	24.0327	12	19810.2	0.267426	0.405037	24.0163	13.501	15108.7	4581.72	0.303251	11741	12119	15286	2504	37185	3993	2838	4032	20267	17548	23941	17485	20253	16295	16855	19418	15110
unknown1507	0.0787266	0.149527	24	18	2126.45	0.908811	1	28	17.9999	6180	0.260247	0.400177	26	18.1071	4805.87	229.241	0.0477002	3594	3752	4819	1047	11006	1758	1335	1530	5512	5401	7449	4776	6402	5413	6105	6800	4793.69
unknown1640	0.0787266	0.149527	24	18	4627.31	0.311575	0.900865	24.2975	17.9999	11205.2	0.115481	0.270621	24.1488	18.0006	7957.53	1440.9	0.181073	6050	5016	8531	1448	13250	3232	1268	1493	12319	12245	11146	6391	12475	13077	10402	8867	7950.62
unknown1668	0.0787266	0.149527	24	15	2248.95	0.560935	0.974375	20	12	6895.75	0.181938	0.32481	22	13.475	4590.09	2824.4	0.615327	4764	3762	4679	518	9170	698	539	739	8094	5638	6920	6931	5672	4255	4721	5126	4514.12
unknown1698	0.0787266	0.149527	18	9	1205.62	0.617966	1	24.8451	6	3751.25	0.195725	0.33957	21.4225	7.94237	3023.91	1060.07	0.350563	1120	1680	2411	1717	4213	5551	2253	2988	3112	1792	6107	3297	2104	2564	2282	3258	2903.06
unknown224	0.0787266	0.149527	24	15	2216.96	0.263785	0.900865	26.8085	12	11366.8	0.101226	0.258356	25.4043	13.6245	9625.84	1512.21	0.157099	7426	7809	9697	4881	12727	8752	7459	5356	11508	11357	12575	10027	11442	12814	10470	10354	9665.88
unknown251	0.0787266	0.149527	18	9	1676.37	0.502648	0.953987	20	6	9882.25	0.167374	0.313165	19	7.6	8010.62	1753.09	0.218846	4733	4848	6733	8614	8047	11058	11294	9130	9465	5665	8231	6795	8599	8024	5640	5780	7666
unknown260	0.0787266	0.149527	24	18	1186.35	0.426409	0.916342	25.4179	18	5076	0.14751	0.297839	24.7089	18.0148	4216.91	289.219	0.0685856	3526	3591	4446	1968	5812	3344	2889	1823	5235	4576	5287	4570	5766	5744	4604	4190	4210.69
unknown268	0.0787266	0.149527	18	9	2935.02	0.680636	1	28	6	10546.2	0.210398	0.352874	23	8.21429	8554.39	1929.95	0.225609	3977	4852	7605	4410	12696	13316	8981	7192	10502	8660	10081	6613	10893	9348	8290	8049	8466.56
unknown283	0.0787266	0.149527	24	18	740.518	0.376238	0.906507	25.4179	17.9999	4534.5	0.133862	0.285937	24.7089	18.0148	3917.65	329.552	0.0841199	4133	3875	3469	2465	4773	3009	2770	2934	4216	4576	4524	3687	4537	4649	4868	4084	3910.56
unknown3	0.0787266	0.149527	18	9	24439	0.218849	0.900865	20	6	162548	0.0871998	0.243487	19	7.6	98267.2	46676.1	0.474992	38192	38074	49872	120367	78976	242109	181879	147226	68741	72695	59158	55736	73284	82642	59930	56587	89091.8
unknown32	0.0787266	0.149527	18	9	627.911	0.225337	0.900865	20	6.00001	7401.25	0.0892665	0.24374	19	7.6	4027.37	2190.89	0.543999	1324	1243	1462	7548	2576	10556	9351	7122	2104	2239	1893	1603	2292	2681	1697	1856	3596.69
unknown357	0.0787266	0.149527	18	9	1432.95	0.426968	0.916342	20	6.00002	12126.5	0.147659	0.297839	19	7.60001	10004.2	1707.38	0.170667	7015	6766	8315	11215	9775	13869	13517	11345	9875	9255	8579	8531	10379	10065	8352	7844	9668.56
unknown393	0.0787266	0.149527	18	9	2037.88	0.346464	0.900865	20	6.00001	9692.75	0.125517	0.277348	19	7.60001	6333.94	2731.73	0.431285	2372	1799	3975	6878	5271	14431	10345	8724	6264	4569	4900	3896	5942	5775	4405	3205	5796.94
unknown397	0.0787266	0.149527	24	15	1648.62	0.227367	0.900865	28	17.9999	11945.5	0.0899101	0.243957	26	16.4821	10340.7	1452.03	0.140419	7537	7663	9317	6760	11723	12687	9756	7758	12001	11963	11199	9798	11763	13596	11118	11305	10371.5
unknown431	0.0787266	0.149527	18	9	874.691	0.237113	0.900865	20	6	7077.25	0.0929806	0.247716	19	7.6	4805.03	1634.38	0.340138	2551	2687	3134	6412	3469	9069	8242	7529	3473	3328	3947	3695	3672	3690	3561	3281	4483.75
unknown444	0.0787266	0.149527	18	9	26554.5	0.707331	1	28	6	93185.2	0.216508	0.357737	23	8.21429	74417.1	17158.2	0.230568	35298	40648	60031	38799	117413	116090	76604	62634	86927	77295	84177	58737	98798	81718	72454	70556	73636.2
unknown461	0.0787266	0.149527	18	9	1160.01	0.496263	0.951746	20	6	7419.75	0.165748	0.31267	19	7.6	5832.74	1441.8	0.24719	4171	3326	3921	6591	5010	9225	8817	6627	6975	4826	4923	4855	5865	5760	4086	3811	5549.31
unknown479	0.0787266	0.149527	18	9	2702.56	0.333726	0.900865	20	6.00002	14320.2	0.121886	0.275788	19	7.60001	9293.16	4105.11	0.441735	3782	3026	5392	9844	7652	21483	15612	12534	9156	7534	6800	5323	9118	8464	5734	4325	8486.19
unknown483	0.0787266	0.149527	18	9	1255.47	0.194137	0.900865	20	6	8425.5	0.0791847	0.237155	19	7.6	4702.8	2559.69	0.544291	1731	1744	2117	6948	2649	12312	9308	9433	2922	2626	2490	2351	2524	3078	2717	2244	4199.62
unknown499	0.0787266	0.149527	18	6	15301.4	0.230606	0.900865	20	6	39982.5	0.0909342	0.245075	19	6.01667	21395.1	18950.7	0.885747	5425	6722	7182	29037	16653	64555	44154	34568	14412	14633	8004	7251	16627	14860	11899	9597	19098.7
unknown508	0.0787266	0.149527	18	9	908.632	0.227044	0.900865	20	6.00001	8711	0.0898079	0.243957	19	7.6	4248.93	2915.81	0.686245	818	839	879	7624	1778	13589	10243	9234	1686	1634	1387	1292	2104	2963	1459	1283	3675.75
unknown509	0.0787266	0.149527	18	9	873.454	0.629732	1	20	6	5140.75	0.198517	0.342296	19	7.6	3766.39	1141.46	0.303065	2578	1698	2650	3561	2798	7554	5455	4756	4294	3672	2717	2132	4111	3626	3045	2025	3542
unknown526	0.0787266	0.149527	18	9	1211.98	0.210759	0.900865	20	6	8143.75	0.0846011	0.241334	19	7.6	4970.19	2257.4	0.454187	2265	2106	2895	6392	3713	12319	8249	8294	3263	3287	3655	2823	3663	3997	2970	2532	4526.44
unknown546	0.0787266	0.149527	18	9	522.552	0.248855	0.900865	20	6	6245.75	0.0966383	0.251978	19	7.6	3472.64	1901.68	0.547618	1326	1228	1539	4928	2121	9973	7676	5213	2222	1850	1765	1701	2572	2292	1699	1476	3098.81
unknown583	0.0787266	0.149527	24	18	26107.1	0.467999	0.934611	23.9024	17.9999	142434	0.158468	0.307593	23.9512	18	115077	12586.7	0.109377	114023	115090	115510	27132	143347	118387	51969	36304	152221	137339	139477	121018	161765	154768	128021	125183	115097
unknown632	0.0787266	0.149527	18	6	2380.47	0.161904	0.900865	20	6	8619	0.0683517	0.224673	19	6.01667	5083.23	3637.5	0.715588	2277	2319	2393	5819	3958	11555	10375	8588	2836	3769	2702	3244	3961	3897	3735	2851	4642.44
unknown65	0.0787266	0.149527	18	9	5862.62	0.303451	0.900865	20	6	40284.2	0.113101	0.26963	19	7.6	23139.4	12428	0.537092	8332	8199	10594	24442	15514	67336	44578	33709	14999	15116	14454	10951	17046	20331	13259	12281	20696.3
unknown667	0.0787266	0.149527	24	18	3589.63	0.561375	0.974375	24.9858	18	15834.7	0.182046	0.32481	24.4929	18.0073	13023	1025.25	0.0787261	12247	11186	13540	4610	19871	9204	7003	5850	17380	14879	14217	14791	15988	18366	13974	15011	13007.3
unknown668	0.0787266	0.149527	24	15	31666.2	0.271956	0.900865	28	17.9999	135675	0.103708	0.260334	26	16.4821	114186	696.024	0.00609553	84942	74032	111032	52721	154227	113558	87238	68727	152734	144727	132424	108152	140084	163535	124640	114440	114201
unknown700	0.0787266	0.149527	18	9	7778.88	0.217453	0.900865	20	6	59903.5	0.086753	0.243487	19	7.6	24054.1	24483.3	1.01784	1354	537	2744	32574	5815	116486	67505	49808	4296	5241	3005	1724	4110	8897	2659	1105	19241.2
unknown746	0.0787266	0.149527	18	9	1347.75	0.289938	0.900865	20	5.99999	6843.75	0.109104	0.265085	19	7.59999	4201.81	2079.97	0.495016	2027	1615	1642	4254	3337	11018	6677	6343	3689	3363	2824	2153	2952	3999	2953	1841	3792.94
unknown78	0.0787266	0.149527	18	9	10772.4	0.261689	0.900865	20	5.99998	60887.2	0.100586	0.258221	19	7.59999	40708.7	16077.5	0.394941	19577	17331	27035	41141	35244	87623	65304	55378	39337	31401	30271	26160	39737	34357	28281	22594	37548.2
unknown829	0.0787266	0.149527	24	18	9742.16	0.334979	0.900865	24.0327	18	28062.5	0.122245	0.27582	24.0163	18	20956.1	3313.92	0.158136	16924	16013	22681	5439	33020	11244	6047	5155	32009	27523	24621	22343	30805	33982	23568	23895	20954.3
unknown871	0.0787266	0.149527	24	15	5200.77	0.325945	0.900865	24.5682	12	16528.2	0.11965	0.274302	24.2841	13.5194	13014.5	3064.62	0.235476	9439	9511	13193	4966	19851	9618	5346	5951	19918	17309	14863	14023	16863	19168	15009	13456	13030.2
unknown950	0.0787266	0.149527	18	9	1063.49	0.190206	0.900865	20	6.00001	8969.75	0.0778875	0.236005	19	7.6	4340.55	3095.08	0.713061	839	804	1121	7514	1976	13781	10772	9350	1762	1820	1374	1483	1958	2557	1521	1082	3732.12
unknown955	0.0787266	0.149527	24	9	622.961	0.241165	0.900865	20	6	4273.5	0.094248	0.248341	22	7.425	2304.39	1362.3	0.591174	1191	795	1141	2843	1766	7229	4382	3717	1945	1398	1667	1465	1842	1931	782	947	2190.06
unknown983	0.0787266	0.149527	24	18	40808.2	0.291504	0.900865	22.9091	17.9999	111791	0.10957	0.265761	23.4545	18.0097	81984.7	15304.4	0.186674	68186	60103	95454	15745	130579	32059	15423	14694	124451	117702	106481	88348	118087	136065	92285	100727	82274.3
unknown986	0.0787266	0.149527	24	18	77154.9	0.331446	0.900865	23.2718	17.9999	183515	0.121233	0.275358	23.6359	18.0042	133369	21333	0.159954	104794	88324	145190	18640	240880	36308	18339	18363	197942	201761	180402	153135	200056	214117	171346	148541	133634
unknown786	0.0921486	0.173886	24	18	1370.02	0.343908	0.900865	22.4427	17.9999	8142.75	0.141078	0.292718	23.2214	18.0202	6978.57	713.135	0.102189	6692	7368	7414	3715	8420	5276	4253	4395	8559	7486	8492	7332	8345	9008	7804	7414	6998.31
CL 70:8|CL 16:1_18:2_18:2_18:3	0.105571	0.173886	18	9	717.006	0.843514	1	20	6	7219.25	0.304423	0.446138	19	7.6	5996.61	1126.38	0.187836	3312	5002	4667	5126	9197	8629	5586	5465	6014	5882	5622	4835	7131	5810	5043	5082	5775.19
FA 18:1 (oleic acid)	0.105571	0.173886	18	6	154970	0.995648	1	28	6	1.24756e+06	0.341899	0.483077	23	6.29762	1.09726e+06	141856	0.129283	763207	969741	872918	1004734	1425959	1287806	1139595	1136882	1075263	929558	1044756	1055481	1188328	1193047	1155283	1235346	1092369
HexCer 37:2;3O|HexCer 16:1;2O/21:1;O	0.105571	0.173886	24	18	11301	0.27962	0.900865	28	17.9999	34802	0.133509	0.285474	26	18.1071	26709.1	1628.23	0.0609616	17336	18477	27402	8904	41213	18171	13944	11563	34613	36051	29772	29307	35251	43157	28761	32039	26622.6
PE 32:1|PE 16:0_16:1	0.105571	0.173886	18	9	143090	0.323268	0.900865	20	5.99998	863868	0.149399	0.300269	19	7.59999	608438	200067	0.32882	330663	292551	418644	672577	532213	1216122	900658	806481	583758	495720	466129	415421	599228	558580	441213	375798	569110
PE 36:1	0.105571	0.173886	18	9	101091	0.224441	0.900865	20	6	846997	0.112371	0.268666	19	7.6	426623	287676	0.674311	112933	110656	146122	591530	228300	1455988	943885	759815	206129	209911	171294	150486	230187	268187	181924	153807	370072
PE-Cer 34:1;3O	0.105571	0.173886	18	6	12479.7	0.203797	0.900865	20	6	22114.8	0.104111	0.260695	19	6.01667	11675	9917.62	0.849474	4357	5108	3625	22348	6321	31824	24887	25427	5871	5230	4903	4160	5085	7979	5417	5029	10473.2
PE-Cer 35:1;2O|PE-Cer 17:0;2O/18:1	0.105571	0.173886	18	6	760.14	0.267173	0.900865	20	6.00001	1871.75	0.12885	0.280843	19	6.01667	1229.42	628.085	0.510878	685	841	547	1901	949	2449	1955	2134	872	851	836	725	984	1097	861	766	1153.31
PE-Cer 36:2;3O	0.105571	0.173886	24	18	38599.7	0.734237	1	27.8233	17.9999	200215	0.27574	0.415182	25.9117	18.0985	165577	16596.6	0.100235	144449	170945	156769	80980	257856	120092	91567	87167	199698	194236	178206	152799	198438	229041	189894	183489	164727
unknown1019	0.105571	0.173886	24	18	21937.6	0.315793	0.900865	24.1644	17.9999	59160.2	0.146724	0.297573	24.0822	18.0002	44039.1	6479.87	0.147139	35739	30814	46736	11023	71444	20923	12885	11277	67937	59904	52468	46558	62985	70313	50222	53121	44021.8
unknown1068	0.105571	0.173886	18	6	10208.1	0.290908	0.900865	20	5.99998	17271.8	0.137683	0.289147	19	6.01666	8203.68	8534.77	1.04036	1453	1959	1569	19062	2977	29549	19902	16659	2549	2190	2639	1715	3581	4046	2762	2099	7169.44
unknown1071	0.105571	0.173886	24	18	22248.8	0.293916	0.900865	22.4427	12	68156.8	0.138787	0.290452	23.2214	14.9162	51798.5	25658.1	0.495344	49579	53220	44685	9541	64132	40038	15874	11754	82205	74002	67430	48990	77271	85359	57322	47820	51826.4
unknown1119	0.105571	0.173886	24	18	4580.99	0.31468	0.900865	24.8451	17.9999	12982.7	0.146324	0.297542	24.4225	18.0054	9570.11	1511.98	0.15799	7394	6250	10901	2440	15389	4596	2896	2817	13749	12572	11985	9882	13547	15542	11370	11472	9550.12
unknown1143	0.105571	0.173886	24	18	4369.21	0.318176	0.900865	28	17.9999	11365.5	0.147579	0.297839	26	18.1071	7885.81	49.3866	0.00626272	3822	3203	7268	1388	14362	5359	2722	2178	11854	10902	9890	7721	12669	15865	8809	8119	7883.19
unknown1144	0.105571	0.173886	24	9	574.878	0.261857	0.900865	20	6	4254	0.126842	0.279451	22	7.425	2448	1173.61	0.479416	1163	1320	1257	3714	1969	6810	4534	3703	2188	1390	1856	1434	2037	1925	1280	1012	2349.5
unknown121	0.105571	0.173886	18	9	17407.6	0.307213	0.900865	20	5.99998	94440.8	0.143631	0.295738	19	7.59999	63683.6	24303.3	0.381626	32010	25929	40383	69592	54834	137085	98874	86970	60519	51474	47073	40170	61719	58170	44169	33527	58906.1
unknown1235	0.105571	0.173886	18	9	2123.8	0.411595	0.909065	20	5.99999	19158	0.179723	0.323818	19	7.6	14281.5	3619.49	0.253439	8442	8703	9190	17115	14146	24986	19122	18378	14673	10956	11576	9527	14272	14907	11725	9402	13570
unknown1237	0.105571	0.173886	18	6	2980.81	0.123275	0.900865	20	6	8809.75	0.0695183	0.225859	19	6.01667	5196.35	3591.05	0.691071	2327	2876	2725	6933	4267	11806	9661	9505	2621	2845	4125	3215	3995	3574	2816	2888	4761.19
unknown1243	0.105571	0.173886	18	6	1461.94	0.345658	0.900865	20	6	3201.75	0.157303	0.307349	19	6.01667	1875.65	1265.37	0.674631	859	912	819	3384	1134	5313	3036	3324	973	1061	1059	916	1187	1263	1064	1253	1722.31
unknown1267	0.105571	0.173886	24	18	4565.08	0.351865	0.900865	24.8451	17.9999	11351	0.159466	0.308091	24.4225	18.0054	8464.46	871.692	0.102983	5896	4692	9388	2086	14752	4377	2187	2054	12458	12044	11051	8858	12449	13250	9821	9884	8452.94
unknown1274	0.105571	0.173886	24	18	1603.01	0.683434	1	22.4427	17.9999	6986	0.261834	0.401241	23.2214	18.0202	5385.42	1090.83	0.202553	4843	6663	5824	1240	9505	2015	1301	1174	6658	6861	7106	5516	6216	7661	6939	7128	5415.62
unknown1281	0.105571	0.173886	18	9	619.249	0.277799	0.900865	20	5.99999	3494.5	0.132831	0.285474	19	7.59999	2293.22	955.271	0.416563	840	1170	1622	2531	1832	5176	3011	3959	1552	1067	2044	2468	1762	1478	1625	1550	2105.44
unknown1295	0.105571	0.173886	18	6	76045.4	0.214375	0.900865	20	6	146926	0.10837	0.26504	19	6.01667	79681.1	63793.5	0.80061	34644	36537	29741	146555	47863	227601	165962	146280	41736	37509	36561	32320	43839	49152	36387	38523	71950.6
unknown1322	0.105571	0.173886	24	18	31664.1	0.556035	0.973164	23.0287	18	139006	0.225136	0.365988	23.5144	18.0077	112290	15490.2	0.137948	103398	116832	116818	43976	174254	67652	45901	41888	139278	135405	142523	116833	139043	161612	128960	126409	112549
unknown136	0.105571	0.173886	24	18	4032.98	0.299698	0.900865	23.0287	17.9999	20348.2	0.140901	0.292718	23.5144	18.0076	16916.9	1847.84	0.10923	15131	15451	19285	8133	21907	11737	10810	7820	19941	20051	20872	18634	19749	22016	18970	20658	16947.8
unknown1362	0.105571	0.173886	18	6	6318	0.985298	1	20	6	41395	0.339432	0.48138	19	6.01667	35541.5	7660.65	0.215541	21928	28260	27141	29280	48831	43541	37403	35805	33120	28865	32039	34409	37669	39824	36499	39197	34613.2
unknown1424	0.105571	0.173886	18	9	918.885	0.363958	0.900865	20	6	6486	0.163648	0.311084	19	7.6	3493.22	2011.48	0.575822	586	1094	694	6457	2395	10851	7331	5367	1657	2810	1293	1100	1889	3386	1493	1162	3097.81
unknown1437	0.105571	0.173886	18	9	1620.16	0.768706	1	20	6	8537.5	0.284962	0.425342	19	7.6	6095.38	2228.77	0.365649	2353	3648	4157	4578	6858	15277	5428	6587	3945	3667	8335	5488	4099	5514	5005	5577	5657.25
unknown145	0.105571	0.173886	18	9	5143.85	0.316742	0.900865	20	6	39017.5	0.147065	0.297839	19	7.6	24569.1	10276.1	0.418251	10759	11068	12672	30959	18295	59231	43889	34655	17545	18390	15845	14301	20280	22913	16066	13917	22549.1
unknown1454	0.105571	0.173886	24	18	6966.42	0.948278	1	28	17.9999	23311.2	0.330513	0.47086	26	18.1071	19191.6	1722.87	0.089772	13774	14103	17881	6561	43642	11445	7634	9503	23590	19953	28636	18564	23456	21266	22555	25968	19283.2
unknown1555	0.105571	0.173886	24	18	6157.13	0.53466	0.964892	22.4427	17.9999	21277.5	0.218694	0.359683	23.2214	18.0202	15892.4	2941.58	0.185093	14696	15395	16397	2077	30463	3200	2236	1712	21978	19324	23400	19594	23666	23073	18788	19583	15973.9
unknown1562	0.105571	0.173886	18	6	3452.45	0.197723	0.900865	20	6	8574	0.10164	0.258356	19	6.01667	4171.58	4376.91	1.04922	899	1221	1109	6120	2766	14550	9441	7539	1994	1666	1632	1078	2277	2904	1628	1435	3641.19
unknown159	0.105571	0.173886	18	9	8416.69	0.228077	0.900865	20	6	64082.8	0.113805	0.270269	19	7.6	26474.7	25630.5	0.968114	2404	2010	3111	35043	6653	124145	71327	54206	5864	6015	3949	3414	6860	9413	4656	3911	21436.3
unknown1638	0.105571	0.173886	18	9	3333.83	0.815174	1	20	6	16194.2	0.297137	0.440311	19	7.6	10579.5	4756.93	0.449635	4404	4508	4724	7427	5960	31574	15506	11737	9252	9520	8181	6257	10173	11968	6226	6894	9644.44
unknown1657	0.105571	0.173886	24	15	8114.76	0.913319	1	22.3291	12	20588.8	0.32195	0.463913	23.1646	13.4634	14436.6	6684.36	0.463015	12252	10636	13492	1008	37967	1994	932	1563	22460	18100	25415	16380	18597	14648	16683	17393	14345
unknown166	0.105571	0.173886	18	9	8733.48	0.313608	0.900865	20	6	51201	0.145939	0.297347	19	7.6	31724	14558.4	0.458908	13673	11462	17262	37182	22673	80208	53987	47936	27164	22219	20809	17502	28829	27611	18345	14933	28862.2
unknown1680	0.105571	0.173886	24	18	11721.2	0.39272	0.908997	23.0287	17.9999	27303.2	0.173427	0.31824	23.5144	18.0076	19597	3581.18	0.182742	16337	13045	21539	2076	36205	2410	2142	2859	28663	26286	29840	23896	32548	32813	27211	16641	19656.9
unknown1701	0.105571	0.173886	24	15	4818.58	0.351284	0.900865	28	17.9999	16508.2	0.159264	0.307965	26	16.4821	13363.7	851.291	0.0637018	5588	11428	9524	7246	21060	8768	10884	9532	16375	18827	14088	14755	20186	20314	14215	11318	13381.8
unknown1703	0.105571	0.173886	18	9	3001.31	0.927085	1	26.9725	6	12693.2	0.325338	0.466401	22.4862	8.12258	10570.6	2241.68	0.212067	5520	7980	8577	6111	18228	10803	12448	9294	11437	7148	15155	10967	16480	7269	10401	8856	10417.1
unknown1717	0.105571	0.173886	24	15	2934.85	0.904325	1	22.4427	12	6912.25	0.319724	0.461892	23.2214	13.4648	4530.28	2686.27	0.592958	3360	2244	4344	64	13376	84	55	127	7340	5008	8526	6775	5752	4210	4328	6339	4495.75
unknown204	0.105571	0.173886	18	9	1036.09	0.417873	0.911102	20	6.00001	6040	0.181796	0.32481	19	7.60001	4447.83	1296.01	0.291381	2659	2332	3117	4451	4289	8423	6130	5318	4491	4093	3780	2654	4493	4607	3197	3055	4193.06
unknown205	0.105571	0.173886	24	15	7479.78	0.361775	0.900865	28	17.9999	34938.5	0.162896	0.310595	26	16.4821	29581.8	347.755	0.0117557	21910	21006	29667	15469	41096	28978	23083	16197	37545	36520	32904	29062	35602	40982	32585	30585	29574.4
unknown208	0.105571	0.173886	24	18	3541.9	0.370075	0.905031	26.8085	17.9999	15177.2	0.165748	0.31267	25.4043	18.0551	12454	842.424	0.0676428	9999	11173	12486	5429	17612	9682	7218	6841	16391	14448	13989	12753	16886	16146	13925	13752	12420.6
unknown218	0.105571	0.173886	18	9	1669.3	0.355203	0.900865	20	6	13708.5	0.160625	0.309047	19	7.6	9507.96	3104.78	0.326545	5384	4932	5717	11751	7373	19371	15733	12357	7610	7754	7269	6693	8680	8257	7121	6360	8897.62
unknown225	0.105571	0.173886	18	9	2398.15	0.459257	0.930091	20	6.00001	14553.2	0.195222	0.33933	19	7.60001	10732.5	3116	0.290332	5630	6019	7478	11096	10432	20131	14622	13028	11102	9101	8834	7246	11826	10747	8892	5736	10120
unknown24	0.105571	0.173886	18	9	1031.67	0.349549	0.900865	20	5.99999	6788.75	0.15866	0.307593	19	7.6	4568.52	1687.08	0.369284	2319	2108	2871	5135	3752	10012	7090	6301	4493	3383	3299	2722	4714	4077	3051	2463	4236.88
unknown253	0.105571	0.173886	18	9	2847.52	0.254489	0.900865	20	6	23465.8	0.124039	0.276808	19	7.6	14253.7	6467.55	0.453745	6037	6681	7233	17706	10735	36151	26493	20484	10552	10037	8280	7381	10835	11842	9223	8047	12982.3
unknown266	0.105571	0.173886	18	9	1838.48	0.204209	0.900865	20	6	12247.5	0.104278	0.260695	19	7.6	7836.35	3108.99	0.396739	4221	3046	4528	10702	6429	16034	13916	12611	6870	5597	4948	4163	6801	5759	5032	4946	7225.19
unknown304	0.105571	0.173886	24	9	669.807	0.362407	0.900865	20	6	5606.5	0.163114	0.310595	22	7.425	4151.61	988.778	0.238167	3279	2950	3300	5760	3464	7489	5989	5484	4211	3449	3637	3321	1928	4144	3158	3535	4068.62
unknown314	0.105571	0.173886	24	18	69439.5	0.279645	0.900865	28	17.9999	315619	0.133518	0.285474	26	18.1071	261084	4094.71	0.0156835	199615	193622	251464	132037	363447	234767	182818	161157	328256	328640	289700	252829	332820	359711	295401	274543	261302
unknown429	0.105571	0.173886	24	18	17505.5	0.452296	0.926663	26.9725	17.9999	60409.7	0.192992	0.337173	25.4862	18.0614	48665	1581.75	0.0325027	44316	31601	42853	20504	73165	42072	22852	22446	67707	66731	54838	46864	76195	69669	46515	49260	48599.2
unknown443	0.105571	0.173886	24	15	12422.5	0.574944	0.982073	24.2975	17.9999	80655	0.230762	0.372171	24.1488	16.4914	68195.3	10430.3	0.152947	67673	66731	67566	22737	85626	73154	38253	27137	87540	79794	81250	70620	90591	85760	73639	72630	68168.8
unknown488	0.105571	0.173886	24	18	1505.25	0.511721	0.957474	28	17.9999	5928.75	0.21168	0.353851	26	18.1071	4895.89	26.1026	0.00533154	4465	3239	4537	2391	7520	4199	3017	2479	6138	6435	5559	4618	6917	6326	4664	5808	4894.5
unknown503	0.105571	0.173886	18	6	3878.83	0.21141	0.900865	20	6	11697.2	0.107182	0.263738	19	6.01667	7148.62	4570.6	0.639368	3448	3338	4039	9631	5860	17278	13532	10119	5190	5262	4312	3919	5473	5744	4373	3998	6594.75
unknown544	0.105571	0.173886	24	15	1298.25	0.239652	0.900865	28	17.9999	5695.25	0.118328	0.273777	26	16.4821	4659.56	165.174	0.0354484	3554	2886	4201	2135	6317	4937	3924	2228	5238	6352	5141	4915	5852	6549	4953	5427	4663.06
unknown573	0.105571	0.173886	24	15	3640.19	0.493667	0.949684	23.6461	17.9999	18156.7	0.206084	0.348696	23.8231	16.512	14933.9	2773.72	0.185733	13948	14960	15092	3530	18759	15706	7218	4645	20115	18669	18518	15300	21379	19089	16555	15604	14942.9
unknown613	0.105571	0.173886	24	18	9863.08	0.251552	0.900865	24.7059	18	35355	0.122916	0.275996	24.3529	18.0038	27936	2952.1	0.105674	22015	21970	30081	11156	38229	19866	13445	12531	35833	37434	33210	29260	36049	42848	30669	31854	27903.1
unknown614	0.105571	0.173886	18	6	1628.82	0.333856	0.900865	20	6	6852.5	0.153156	0.305089	19	6.01667	5001.31	1965.51	0.393	3139	2872	3410	5775	4801	8774	7384	6451	4315	4240	3986	3303	5487	4693	4163	3417	4763.12
unknown627	0.105571	0.173886	24	15	46476.4	0.340568	0.900865	28	17.9999	185566	0.15552	0.306936	26	16.4821	153786	1547.1	0.01006	103751	102447	153931	73738	229514	134784	111091	87437	201328	192586	168717	158470	191650	222277	168936	159401	153754
unknown7	0.105571	0.173886	18	9	21979.9	0.341109	0.900865	20	5.99998	130718	0.155709	0.306936	19	7.59999	93465.5	29364.4	0.314173	50862	44880	65863	102915	83929	178824	136798	123321	90968	77604	73992	62665	94829	88505	70134	57001	87693.1
unknown758	0.105571	0.173886	24	18	4224.61	0.354406	0.900865	25.7143	18	13485.5	0.160348	0.309047	24.8571	18.0214	10447.8	925.573	0.08859	8153	7188	11195	3054	16424	6762	4264	4105	15142	13161	12216	11180	13381	16305	11518	12738	10424.1
unknown775	0.105571	0.173886	18	6	18522.7	0.348381	0.900865	20	6.00001	40777.5	0.158253	0.307593	19	6.01667	26055.2	14170.3	0.543857	10888	16246	13599	44276	18173	49582	52882	42473	18242	18161	12904	12820	19620	27754	16916	14872	24338
unknown83	0.105571	0.173886	18	9	5089.22	0.379719	0.906601	20	5.99999	32027.5	0.169036	0.314143	19	7.59999	19109.5	10301	0.539049	8151	7109	7492	22157	11301	53883	36368	26558	22683	14254	8197	9727	16058	14668	8878	5869	17084.6
unknown861	0.105571	0.173886	24	18	4213.3	0.446596	0.926663	23.7736	17.9999	12583	0.191158	0.33475	23.8868	18.0004	9616.53	1192.84	0.124041	7711	5938	11838	2323	16868	3616	3230	2632	12749	12179	12671	11849	13027	12561	11181	13563	9621
unknown867	0.105571	0.173886	24	18	13866	0.286602	0.900865	23.6461	17.9999	33883.5	0.136096	0.287427	23.8231	18.001	24753.8	3886.47	0.157005	19045	15793	28505	4078	41201	9289	5285	5366	34533	36359	32591	28849	35926	40693	29555	29360	24776.8
unknown868	0.105571	0.173886	24	15	4275.34	0.342963	0.900865	28	12	19560	0.156359	0.306936	26	13.6964	16487.2	3025.93	0.183532	11739	10265	16521	8070	23464	16906	12707	10594	22565	20982	18361	16332	20244	23125	18290	15474	16602.4
unknown947	0.105571	0.173886	24	18	2194.15	0.402843	0.908997	23.0287	17.9999	8001	0.176815	0.321418	23.5144	18.0076	6115.86	1139.86	0.186377	5658	5692	7040	1636	9153	3164	1848	1983	8436	8084	7207	6254	8639	9499	7070	6796	6134.94
unknown960	0.105571	0.173886	24	18	5134.66	0.342669	0.900865	22.9091	17.9999	15057.5	0.156256	0.306936	23.4545	18.0097	11680.6	1659.69	0.142089	9842	8834	13753	3860	17670	5554	4599	3660	16701	16092	14104	12493	16703	17688	12819	13020	11712
Cer 34:1;3O|Cer 15:1;2O/19:0;O	0.139706	0.206887	18	9	1819.03	0.225569	0.900865	20	6.00001	19293.8	0.140466	0.292258	19	7.6	10131.7	6078.19	0.599917	3874	2795	3903	15836	4925	30827	23010	18413	5363	4850	4362	3983	5126	6536	4499	4688	8936.88
Cer 34:2;3O|Cer 14:2;2O/20:0;(2OH)	0.139706	0.206887	24	18	15058.5	0.773355	1	28	17.9999	109635	0.348462	0.489858	26	18.1071	95204.1	400.009	0.0042016	76251	101195	86386	59976	131058	96222	70913	61983	99491	105855	108439	86616	104902	117133	108550	107955	95182.8
Cer 36:2;3O|Cer 15:1;2O/21:1;O	0.139706	0.206887	24	15	58788	0.295975	0.900865	28	17.9999	243794	0.173077	0.31824	26	16.4821	202374	6313.28	0.0311961	145488	142859	202564	100864	283062	188038	150238	112913	252819	250168	234622	197036	251595	282088	228438	213054	202240
FA 16:1 (palmitoleic acid)	0.139706	0.206887	18	6	152432	0.994406	1	28	6	1.09243e+06	0.413138	0.553579	23	6.29762	939725	145841	0.155195	623209	759896	738642	852327	1300581	1142024	969822	957286	911858	796872	885919	891516	1019734	1036071	1019502	1049941	934700
GlcCer d38:1	0.139706	0.206887	18	6	2441.99	0.245532	0.900865	20	6.00001	5745.75	0.149989	0.300647	19	6.01667	3259.08	2418.02	0.741932	1340	1776	1286	5231	2174	9234	5377	6198	2137	1646	1971	1336	2428	2106	1676	1541	2966.06
HexCer 34:0;2O	0.139706	0.206887	18	6	988.005	0.174763	0.900865	20	6.00001	2329	0.115059	0.270479	19	6.01667	1316.6	981.766	0.745685	540	840	514	2037	863	3438	2552	2463	731	683	800	710	862	844	628	657	1197.62
HexCer 35:2;3O|HexCer 16:1;2O/19:1;O	0.139706	0.206887	24	18	11048.2	0.265236	0.900865	24.5682	17.9999	35717.7	0.159165	0.307965	24.2841	18.0024	28397.9	2479.39	0.0873091	22409	20245	31011	11396	41632	17897	14533	12162	37960	37728	33854	30310	35537	39497	33546	34291	28375.5
PE 38:1|PE 20:0_18:1	0.139706	0.206887	18	9	44983.3	0.297815	0.900865	20	6	346486	0.173895	0.318429	19	7.6	198011	105698	0.533801	72107	72056	91094	231055	130134	585432	372872	297508	126683	132835	109621	95271	143174	166064	111986	97832	177233
PE 38:2|PE 20:0_18:2	0.139706	0.206887	18	6	37819.1	0.243645	0.900865	20	6.00001	102566	0.149098	0.299934	19	6.01667	65323	36948	0.565619	30712	39382	34295	94965	53610	146084	112246	98325	45718	44957	41378	35836	54720	55636	44551	41115	60845.6
PE P-36:2 or PE O-36:3	0.139706	0.206887	24	18	12135.9	0.35853	0.900865	23.9024	12	32760.5	0.200053	0.343889	23.9512	14.994	24783.5	11190.3	0.451522	19643	17385	25398	5447	41938	12179	7635	6323	35253	36817	31570	27402	35562	39462	26152	28371	24783.6
PEtOH 36:4|PEtOH 18:2_18:2	0.139706	0.206887	24	18	486.313	0.973703	1	28	17.9999	3393.75	0.407398	0.549976	26	18.1071	3022.37	147.119	0.0486766	2109	2771	3108	2274	4737	2614	2569	2107	3275	2618	3210	3516	3368	3626	3207	3374	3030.19
unknown1003	0.139706	0.206887	24	18	13644.7	0.330389	0.900865	22.6735	12	42060	0.188124	0.331177	23.3368	14.9268	32090.3	15678.2	0.488564	30277	34127	27625	4550	39784	26782	9173	6344	52666	44145	41410	30019	49144	51505	36292	29795	32102.4
unknown1020	0.139706	0.206887	18	6	2291.73	0.337276	0.900865	20	6	6878	0.191073	0.33475	19	6.01667	3301.58	3633.72	1.1006	551	629	1036	3983	1570	13285	7306	5351	1245	1720	1164	988	1884	2503	1473	1092	2861.25
unknown1100	0.139706	0.206887	24	18	585.131	0.52462	0.960662	28	17.9999	4317.25	0.264828	0.402804	26	18.1071	3879.7	36.7539	0.00947337	3267	4014	3461	2767	4983	3719	3118	2649	4357	3943	4446	4051	4291	4444	4153	4381	3877.75
unknown1138	0.139706	0.206887	24	18	52566	0.50139	0.953179	23.52	17.9999	125545	0.256274	0.396979	23.76	18.0018	89809.5	16056.8	0.178787	69399	53945	109278	7553	182079	15775	4533	6100	131398	133650	120146	102986	130656	152014	112203	107308	89938.9
unknown1142	0.139706	0.206887	18	6	870.095	0.998529	1	20	6	4415.5	0.414273	0.553927	19	6.01667	3488.89	1072.91	0.307522	2276	1286	3017	3532	3662	6849	4417	2734	2594	3428	2328	2341	3109	2646	5598	3925	3358.88
unknown1189	0.139706	0.206887	24	18	4679.63	0.316297	0.900865	22.9091	17.9999	13309.2	0.182026	0.32481	23.4545	18.0097	9922.12	1698.06	0.171139	9333	10329	8511	1253	12222	7793	2484	1895	16982	13537	12531	9161	16185	16907	11030	9115	9954.25
unknown1257	0.139706	0.206887	24	18	2350.78	0.361583	0.900865	23.7736	17.9999	7012	0.201328	0.345552	23.8868	18.0004	5335.13	682.458	0.127918	4925	5226	4056	1165	6826	4355	1771	1545	9265	6552	6763	4906	7643	9780	5462	5163	5337.69
unknown1262	0.139706	0.206887	24	18	1381.51	0.469147	0.934611	28	17.9999	6200.25	0.24415	0.38627	26	18.1071	5145.82	173.019	0.0336233	4069	4688	4547	2741	7509	4379	3351	2679	6377	6119	6416	4510	6494	7138	5824	5345	5136.62
unknown1346	0.139706	0.206887	18	6	1149.76	0.231529	0.900865	20	6	5715	0.143334	0.295738	19	6.01667	4372.21	1372.65	0.313948	2971	3518	3137	5152	4285	7448	5328	5799	3967	3478	3869	3369	4112	4045	3444	3372	4205.88
unknown1353	0.139706	0.206887	24	18	1992.45	0.43108	0.916833	22.9091	17.9999	7825.5	0.229436	0.370564	23.4545	18.0097	6128.89	917.469	0.149696	5450	6133	6218	1965	9875	2751	2216	1972	7673	8161	7892	6732	7451	8939	7049	7863	6146.25
unknown1367	0.139706	0.206887	18	6	565.685	0.521392	0.957474	20	6	5431	0.263648	0.402443	19	6.01667	4895.33	473.579	0.096741	4381	5477	3874	5639	5441	6215	5127	4941	4330	4145	4640	4310	5091	4337	4631	4828	4837.94
unknown1394	0.139706	0.206887	24	18	8004.98	0.678888	1	22.7907	12	32621.8	0.318253	0.460657	23.3953	14.9324	25921.8	9703.18	0.374326	22558	27240	24491	7127	46510	13557	9908	6641	30420	33345	34538	32184	33811	34045	27530	30941	25927.9
unknown148	0.139706	0.206887	18	9	12531.5	0.29198	0.900865	20	6.00002	67530.2	0.171295	0.316507	19	7.60001	46013.7	17020.2	0.369893	21589	19514	30095	47197	43960	94851	70742	60568	44468	36676	33940	29191	45095	44677	33067	27057	42667.9
unknown1585	0.139706	0.206887	24	15	1616.45	0.307808	0.900865	20.8511	12	5291	0.17831	0.322385	22.4255	13.461	3607.52	1963.03	0.544151	2289	2181	4750	830	4492	2145	1263	1960	5501	2911	7217	5535	4274	2953	4145	4547	3562.06
unknown1596	0.139706	0.206887	18	9	2717.06	0.555949	0.973164	20	6	18412.5	0.276138	0.415503	19	7.6	14156.8	3756.29	0.265335	9648	9751	9557	14076	13948	26577	13150	19975	15404	12798	7671	15445	15573	10153	10793	10175	13418.4
unknown1648	0.139706	0.206887	18	9	4665.67	0.328086	0.900865	20	6	19857	0.187133	0.330278	19	7.6	10276	7089	0.689861	3004	2274	3081	11755	3402	36097	20282	19647	7626	5714	4753	3729	8068	4523	3224	4940	8882.44
unknown223	0.139706	0.206887	18	9	1266.07	0.428401	0.916833	20	5.99999	9255.5	0.228383	0.369129	19	7.6	6771.9	1898.22	0.280308	3988	3201	5165	8598	5353	12171	10503	8995	6841	5210	5471	4833	6612	6255	5030	4154	6398.75
unknown254	0.139706	0.206887	24	18	7309.36	0.371297	0.906047	24.7059	17.9999	29663	0.205362	0.348345	24.3529	18.0038	24204.7	1981.55	0.0818664	20941	20484	24700	10187	35138	17441	13359	10670	30989	29907	28069	26385	30653	34251	25710	28038	24182.6
unknown303	0.139706	0.206887	18	9	991.717	0.888643	1	20	6	9487	0.383158	0.525788	19	7.6	8398.37	991.963	0.118114	6855	5948	6883	8934	8065	10937	10093	8853	9331	7594	7999	7197	9533	8799	7489	6744	8203.38
unknown37	0.139706	0.206887	18	6	3044.09	0.178737	0.900865	20	6.00001	6910.25	0.117114	0.273348	19	6.01667	3198.73	3581.3	1.1196	989	354	1596	5194	1394	11893	7210	7144	1334	1115	761	891	1196	943	1069	1153	2764.75
unknown372	0.139706	0.206887	18	9	778.878	0.248713	0.900865	20	6	7595.25	0.151484	0.302564	19	7.6	4231.88	2351.52	0.555667	2205	1902	1910	4918	2310	12824	9062	6185	2924	2344	2214	2033	2695	2649	1939	2200	3769.62
unknown399	0.139706	0.206887	24	15	31160.8	0.317424	0.900865	25.8651	17.9999	123042	0.182517	0.324941	24.9326	16.4669	100956	15424.7	0.152786	80403	79087	104202	41679	143825	81115	55474	50921	137874	123062	116284	105979	133886	132645	115699	109938	100755
unknown410	0.139706	0.206887	18	6	8164.79	0.253193	0.900865	20	6	25850	0.153582	0.305414	19	6.01667	14269.3	11863.7	0.831418	4886	4613	7100	16734	10220	43503	28199	21478	9137	9439	7265	6991	9597	11625	7508	7011	12831.6
unknown471	0.139706	0.206887	18	9	713.471	0.950454	1	28	6.00002	5300.25	0.40088	0.5428	23	8.21429	4657.45	463.02	0.099415	3148	3466	4500	4322	4945	6129	5652	4475	4559	4750	4690	4263	4673	5234	4339	5037	4636.38
unknown504	0.139706	0.206887	24	15	26905.6	0.439552	0.921551	28	17.9999	159402	0.23275	0.373765	26	16.4821	137797	28784.1	0.208887	98745	97020	122717	83724	182049	165710	122272	107126	167766	166182	140088	123521	165363	187250	148950	136045	138408
unknown514	0.139706	0.206887	24	18	5115.21	0.28162	0.900865	24.5682	17.9999	16557.5	0.166638	0.313057	24.2841	18.0024	13165.6	1209.19	0.0918448	10579	9566	14443	5168	19182	8087	6917	5744	17996	17036	16153	13374	17261	18139	15555	15275	13154.7
unknown52	0.139706	0.206887	18	6	67969.6	0.284104	0.900865	20	6	208133	0.16776	0.313165	19	6.01667	115545	94449.6	0.81743	38959	38879	53195	145748	78661	352864	226479	174529	71888	75579	60741	52699	80393	93036	64657	57281	104099
unknown563	0.139706	0.206887	24	15	1534.07	0.567902	0.976919	24.0327	17.9999	10498	0.280387	0.420487	24.0163	16.499	8703.37	1714.7	0.197015	8936	9293	8378	3045	10264	9328	4129	3887	11480	10205	9856	8453	12320	10703	9330	9639	8702.88
unknown604	0.139706	0.206887	18	6	1049.7	0.806534	1	20	6	5538.5	0.358679	0.499525	19	6.01667	4327.14	1324.59	0.306111	2625	2666	3980	4291	4694	7497	4889	5074	4046	3779	3350	3028	6204	4318	3225	3000	4166.62
unknown608	0.139706	0.206887	18	9	476.59	0.236134	0.900865	20	6.00001	4486.75	0.145535	0.297347	19	7.6	2457.24	1318.78	0.536691	789	785	880	4448	1381	6160	5300	5106	1461	1410	987	958	1417	1947	1169	970	2198
unknown63	0.139706	0.206887	18	9	894.844	0.384777	0.906601	20	6	7075.25	0.2109	0.353336	19	7.6	4159.58	2182.75	0.524752	1432	1362	1838	6722	2204	11914	8266	5917	3750	2799	2114	2526	2938	2803	1593	1510	3730.5
unknown631	0.139706	0.206887	18	9	2987.88	0.788214	1	28	5.99999	10268.5	0.353062	0.49494	23	8.21428	8059.95	1913.22	0.237374	4029	4331	6516	4211	12926	13221	8214	6713	9168	8519	8893	6209	9877	9793	7913	7033	7972.88
unknown651	0.139706	0.206887	24	15	1383.28	0.699482	1	28	17.9999	4318.75	0.324987	0.466195	26	16.4821	3276.71	151.229	0.0461526	2555	2828	1569	856	5659	2567	1225	1801	4539	6138	2147	3217	2831	5396	3104	5944	3273.5
unknown673	0.139706	0.206887	18	9	1062.43	0.355563	0.900865	20	5.99999	7795.75	0.19881	0.34254	19	7.6	5692.57	1622.51	0.285023	3123	3416	4247	6913	4526	10387	9004	7266	5015	5927	4057	3895	4837	4999	4361	4005	5373.62
unknown702	0.139706	0.206887	24	18	1495.71	0.377543	0.906507	27.8233	17.9999	5997	0.207936	0.350726	25.9117	18.0985	4887.01	241.584	0.049434	4034	3316	5293	2131	7101	4208	2581	2515	6151	5916	5695	5065	6345	6404	5230	6009	4874.62
unknown737	0.139706	0.206887	18	6	3299.36	0.279099	0.900865	20	6	8139.75	0.165497	0.31267	19	6.01667	4482.35	3683.89	0.821865	1515	1455	1700	6492	2705	13110	9105	7639	2780	2311	2158	2087	3076	3759	2487	2196	4035.94
unknown738	0.139706	0.206887	24	18	21058.3	0.397896	0.908997	23.0287	17.9999	82174.5	0.216227	0.357737	23.5144	18.0076	64802.6	8563.76	0.132152	66566	67080	59951	11702	82114	57198	24852	17054	96604	84858	80371	62087	91849	95983	76937	63929	64945.9
unknown759	0.139706	0.206887	24	18	1274.38	0.541759	0.964892	28	17.9999	6962	0.271047	0.409213	26	18.1071	5990.89	45.0222	0.0075151	4592	4432	6277	4244	8457	5402	4563	3451	6977	6049	7269	6255	7791	7454	6279	6324	5988.5
unknown901	0.139706	0.206887	24	18	7414.54	0.263946	0.900865	24.4321	17.9999	21415.5	0.15857	0.307593	24.2161	18.0014	16243.9	1928.43	0.118717	11433	12488	18316	3425	25037	8726	6547	4875	22934	20951	21208	18087	22076	23893	19827	19866	16230.6
unknown951	0.139706	0.206887	24	15	3780.55	0.393603	0.908997	28	17.9999	9533.5	0.214491	0.356426	26	16.4821	6877.2	1108.48	0.161182	3102	3206	6693	1719	13109	4085	2279	1828	10798	9439	8064	7203	10618	12784	7957	6775	6853.69
unknown967	0.139706	0.206887	24	18	7936.21	0.422322	0.912077	23.1496	17.9999	20457	0.225986	0.367104	23.5748	18.0058	15271.8	2303.65	0.150844	13652	11243	16514	1931	26828	5453	3321	2366	24322	20482	20168	16777	22405	25193	16649	17581	15305.3
unknown973	0.139706	0.206887	24	18	997.728	0.283663	0.900865	20.7529	17.9999	6297.75	0.167561	0.313165	22.3765	18.0952	5311.03	951.866	0.179224	6016	6095	5696	3762	6106	3521	3518	2647	5413	5859	6768	5344	5579	6177	6132	7303	5371
unknown975	0.139706	0.206887	18	9	468.812	0.418259	0.911102	20	6.00001	5204.75	0.224377	0.365548	19	7.6	3639.29	1014.76	0.278834	2107	2219	2045	5650	2826	6575	6386	5032	3484	2233	2448	2447	2285	3373	2656	3271	3439.81
unknown978	0.139706	0.206887	18	9	1551.75	0.511778	0.957474	20	6	7950	0.260117	0.400177	19	7.6	4301.97	2641	0.613904	300	339	1370	5569	2514	13227	7449	8610	4643	1542	1588	1331	4732	5397	1514	400	3782.81
CL 72:7|CL 18:1_18:2_18:2_18:2	0.182589	0.250404	18	9	620.133	0.966572	1	27.4766	5.99999	3465.5	0.482602	0.626266	22.7383	8.16723	2940.09	464.364	0.157942	1814	2376	2432	2056	4783	4067	2639	2373	3201	2875	3361	2460	4032	2663	2704	2780	2913.5
Cer 38:3;2O|Cer 16:2;2O/22:1	0.182589	0.250404	24	18	41883	0.368662	0.904531	28	17.9999	158932	0.248952	0.390006	26	18.1071	126776	8768.37	0.0691644	85208	79322	125335	43624	197555	128125	75966	62816	169848	153953	148023	130366	172769	188478	140054	134426	127242
Cer d34:1	0.182589	0.250404	18	6	51741.8	0.234078	0.900865	20	6	103300	0.177483	0.32211	19	6.01667	52649.3	48617.9	0.92343	16028	16785	18059	98613	24609	152117	143204	93270	24185	22935	18692	19417	27190	30312	21615	21093	46757.8
Cer d36:1	0.182589	0.250404	18	6	61190.7	0.230625	0.900865	20	6	159590	0.175491	0.319786	19	6.01667	84330.9	75604.7	0.896525	25720	27206	32126	117306	50476	255629	195367	136890	50536	47657	36396	35205	51460	58567	40832	41333	75169.1
HexCer 34:1;2O	0.182589	0.250404	18	9	294.156	0.138845	0.900865	20	6.00001	2292.75	0.118517	0.273777	19	7.6	1396.29	598.895	0.428918	761	944	760	1832	1139	3439	2293	2300	885	827	962	811	962	932	761	849	1278.56
LPC 15:0	0.182589	0.250404	24	18	346.129	0.747028	1	28	17.9999	1535.25	0.408129	0.550251	26	18.1071	992.366	285.549	0.287746	745	1154	467	378	1332	655	330	382	670	2087	581	713	1192	1708	734	2507	977.188
LPI 18:0	0.182589	0.250404	24	9	618.365	0.17212	0.900865	20	6	5611	0.140168	0.291908	22	7.425	2578.65	1745.15	0.67677	1073	945	748	5268	2074	9372	6081	4917	1144	1030	1111	869	1538	901	1078	766	2432.19
NAPhe 14:1	0.182589	0.250404	24	15	17535.9	0.34088	0.900865	20	12	70238	0.235068	0.37641	22	13.475	45351.6	30959.9	0.682663	30459	29239	62942	8656	51819	28613	13879	22403	72106	36730	108160	63956	45730	39347	47266	50999	44519
PE 28:1|PE 12:0_16:1	0.182589	0.250404	18	9	1433.13	0.409095	0.908997	20	6	10913.8	0.268482	0.406161	19	7.6	7398.06	2547.34	0.344325	4426	4513	4024	8675	5843	16891	10957	9964	7283	5591	4655	4560	7820	6508	5178	3469	6897.31
PE P-34:1 or PE O-34:2	0.182589	0.250404	24	18	5564.93	0.43024	0.916833	26.6465	12	17705.5	0.2784	0.418346	25.3233	15.1983	14172	4058.23	0.286355	11170	9834	13535	4020	23810	9171	6771	7534	19366	18877	17051	15528	19085	21483	15042	14604	14180.1
PE-Cer 36:0;2O|PE-Cer 21:0;2O/15:0	0.182589	0.250404	18	6	12040.6	0.217943	0.900865	20	6	22455	0.168091	0.313165	19	6.01667	11607.9	10435.6	0.899011	3167	4953	3573	21354	6016	34537	26539	22728	5223	5290	4838	4466	5834	7617	4911	4447	10343.3
PI 32:0|PI 16:0_16:0	0.182589	0.250404	18	6	1106.98	0.319658	0.900865	20	6	3453.75	0.224185	0.365501	19	6.01667	2091.09	1393.26	0.666285	896	1083	902	2698	1750	5703	3176	3186	1682	1403	1182	1061	1813	1801	1434	986	1922.25
PI 36:4	0.182589	0.250404	18	9	12976.5	0.939736	1	20	6.00002	100011	0.474034	0.617647	19	7.60001	86833.4	13389.6	0.154199	60092	74816	74179	64059	138883	107066	82499	71597	89384	93361	77530	75701	93758	79148	85803	79344	84201.2
TG 35:0|TG 11:0_12:0_12:0	0.182589	0.250404	24	18	3624.28	0.384727	0.906601	22.2166	12	11105	0.256804	0.397329	23.1083	14.9064	8178.2	4313.62	0.527453	7192	8626	6051	2087	9849	6472	2251	2040	16966	10125	9740	7589	11620	14571	8583	7190	8184.5
unknown1011	0.182589	0.250404	24	12	537.401	0.781252	1	24.1644	12	4306.25	0.420437	0.55884	24.0822	12.0001	3646.75	879.753	0.241243	2753	3556	3103	2450	3030	5577	3351	3985	6180	4193	4047	2805	3444	3947	3276	2689	3649.12
unknown1069	0.182589	0.250404	24	18	241105	0.352037	0.900865	23.3952	12	554030	0.240692	0.382358	23.6976	14.9642	402539	226125	0.561746	310618	231973	465290	51039	723131	119372	58020	54194	620807	596826	551695	446793	639494	639698	506400	425813	402573
unknown1082	0.182589	0.250404	24	18	3861.51	0.505587	0.957437	23.2718	12	10415.8	0.312259	0.454618	23.6359	14.9573	7916.19	3709.24	0.468564	6760	6101	8521	1386	14233	3210	1956	1635	11972	10811	10097	8783	11048	12904	8858	8397	7917
unknown1101	0.182589	0.250404	24	18	2229.51	0.395696	0.908997	26.3284	17.9999	6784.75	0.262095	0.401366	25.1642	18.0386	5254.04	346.418	0.0659335	3921	3567	5248	1579	8691	3913	1910	1648	7082	6758	6836	5586	7499	8094	6330	5216	5242.38
unknown1110	0.182589	0.250404	18	9	809.637	0.252988	0.900865	20	6	5409	0.188233	0.331177	19	7.6	3301.07	1527.43	0.462708	1394	1500	1611	4538	2382	8193	5706	5355	2574	2733	1726	1807	2830	2486	1841	1337	3000.81
unknown1285	0.182589	0.250404	18	9	2959.95	0.217429	0.900865	20	6	23835.8	0.167789	0.313165	19	7.6	12839.9	7604.98	0.592293	3964	3789	6683	18696	6641	36866	28997	22839	7485	5794	8193	5382	10711	5406	5502	4571	11344.9
unknown1308	0.182589	0.250404	24	18	3166.07	0.989634	1	28	6.00001	18697	0.489856	0.633483	26	25.5357	18042.3	579.234	0.0321043	13230	16615	16130	10474	31252	19387	12489	11660	18278	19069	17361	16299	23867	22868	19087	20061	18007.9
unknown1380	0.182589	0.250404	24	15	3031.19	0.517099	0.957474	22.7907	12	10731.5	0.317243	0.459787	23.3953	13.4702	8277.27	2459.62	0.297154	7296	6946	8439	1910	11606	5852	4214	3734	14003	11890	8965	8068	11574	12450	8492	6597	8252.25
unknown1389	0.182589	0.250404	24	18	10120.5	0.375613	0.906507	24.4321	17.9999	24373.7	0.252365	0.393171	24.2161	18.0014	17869.4	2229.29	0.124755	12211	10439	20489	2844	32844	6495	3944	3244	25743	25639	24400	19877	25386	29048	21724	21337	17854
unknown1406	0.182589	0.250404	24	18	1723.57	0.586215	0.989514	24.4321	17.9999	4821	0.346218	0.487616	24.2161	18.0014	3610.46	492.064	0.136288	2267	2870	4523	500	6821	763	992	1232	3912	3928	5783	4838	4506	4924	5092	4762	3607.06
unknown1453	0.182589	0.250404	18	9	773.221	0.953076	1	20	6	6658.25	0.478311	0.621776	19	7.6	5646.89	857.245	0.151808	3981	5009	4083	4615	7986	8340	5457	4850	5936	5021	5335	4422	6690	5815	4767	5347	5478.38
unknown1515	0.182589	0.250404	24	18	2961.01	0.364441	0.901069	24.2975	17.9999	7206.25	0.246868	0.388925	24.1488	18.0007	5218.48	935.171	0.179204	4284	3289	6015	1004	8618	2184	1142	1230	7209	8081	7312	4231	7758	7625	7675	5767	5214
unknown1550	0.182589	0.250404	24	12	1174.15	0.751563	1	28	12	6241.5	0.409776	0.550867	26	12.0714	5450.22	948.022	0.173942	3606	2768	5001	3178	4524	6004	6627	6718	8297	2653	7211	6805	8498	5795	4264	6263	5513.25
unknown1610	0.182589	0.250404	24	18	875.398	0.951564	1	28	17.9999	3245.74	0.477827	0.621508	26	18.1071	1920.89	574.125	0.298884	822	3238	288	101	3886	616	156	329	1380	4154	849	1444	1540	4041	965	6437	1890.38
unknown1670	0.182589	0.250404	24	18	4891.94	0.795874	1	26.4865	17.9999	13473.7	0.425611	0.563715	25.2432	18.0437	10399.3	678.95	0.0652877	7641	7554	10303	2622	20418	7258	2853	1479	15213	14447	10867	11452	17375	17474	12197	6849	10375.1
unknown256	0.182589	0.250404	18	6	4954.7	0.327689	0.900865	20	6	16226.8	0.228333	0.369129	19	6.01667	7171.3	9164.48	1.27794	938	906	1533	8093	2846	33004	17002	12055	1625	2905	2068	1743	3185	4697	2645	1727	6060.75
unknown267	0.182589	0.250404	24	18	4575.69	0.234717	0.900865	28	17.9999	22912.2	0.177851	0.322336	26	18.1071	19472.1	1251.51	0.0642721	14155	13966	19202	11255	26023	19112	15989	13116	23559	23352	21323	19917	23649	25724	21694	20582	19538.6
unknown270	0.182589	0.250404	18	9	4035.46	0.2094	0.900865	20	6	35729	0.163031	0.310595	19	7.6	18743.3	11477	0.612328	5528	6130	7390	28639	9677	57016	40760	35463	10118	8905	8281	8136	10876	10989	9023	6863	16487.1
unknown277	0.182589	0.250404	18	9	1227.54	0.334785	0.900865	20	6	12616.8	0.231968	0.372855	19	7.6	5460.53	4930.11	0.902864	575	621	890	7447	1465	26815	12496	9691	1803	1720	1000	1139	1961	1906	1137	1196	4491.38
unknown456	0.182589	0.250404	24	15	1646.85	0.323792	0.900865	28	17.9999	8544.25	0.226325	0.367285	26	16.4821	7199.11	825.864	0.114718	4488	5463	6529	3905	9673	7729	6446	4576	8584	8804	8856	6236	8815	10248	7620	7494	7216.62
unknown515	0.182589	0.250404	18	6	6027.2	0.307652	0.900865	20	6	16439.8	0.217915	0.359456	19	6.01667	9481.33	7072.27	0.745915	3496	3289	4719	12768	5952	26108	19023	14676	6285	7794	3481	4711	6779	7620	5546	5742	8624.31
unknown520	0.182589	0.250404	24	15	1785.44	0.796665	1	28	6	15581.8	0.42589	0.563752	26	10.9107	13748.7	1615.25	0.117484	7873	9349	12794	8597	19359	19167	13044	10757	16132	14732	15440	11926	20847	14415	14168	13466	13879.1
unknown612	0.182589	0.250404	18	9	1299.31	0.354465	0.900865	20	5.99999	8612.25	0.241907	0.383803	19	7.6	5366.81	2456.72	0.457761	2730	2010	2578	5501	3846	13673	9696	7234	4326	4417	2890	3347	5266	4065	4008	2555	4883.88
unknown646	0.182589	0.250404	24	6	477.297	0.158804	0.900865	20	6.00001	3536.25	0.131659	0.284448	22	6.05	2119.69	1261.6	0.595178	1126	1344	1556	3007	1584	4646	4318	3597	1839	1430	1513	1079	1752	1528	1362	982	2041.44
unknown701	0.182589	0.250404	24	18	3122.58	0.310692	0.900865	28	17.9999	12583.5	0.219511	0.360144	26	18.1071	10257.9	302.174	0.0294576	7312	7013	10026	4762	14878	9294	6168	6492	13943	13243	11399	9520	14175	13627	11996	10536	10274
unknown716	0.182589	0.250404	24	18	3740.77	0.439218	0.921551	28	17.9999	14137.2	0.282554	0.422326	26	18.1071	11617.7	298.493	0.025693	8707	8578	12126	5512	17587	7871	7957	6572	14607	14339	13460	11764	16846	15301	12886	11516	11601.8
unknown744	0.182589	0.250404	18	6	25291.8	0.240934	0.900865	20	6.00001	49997.8	0.181411	0.32481	19	6.01667	25229	23958.3	0.949636	2753	7641	8829	49417	13148	73608	67533	45702	11135	11071	8902	9637	13268	13977	10637	9953	22325.7
unknown89	0.182589	0.250404	18	6	8983.08	0.22568	0.900865	20	6	21805.5	0.172621	0.318129	19	6.01667	9383.94	12295.3	1.31025	1023	1023	1506	14210	3077	40100	24876	19169	3286	2701	1811	1678	3592	3911	2465	1876	7894
unknown940	0.182589	0.250404	24	18	10266.1	0.368359	0.904531	24.2975	17.9999	25039	0.248803	0.390006	24.1488	18.0007	18527.7	2150.5	0.11607	13470	11298	20235	3058	32782	6828	4550	4654	28752	26342	23946	20207	29413	29604	22384	18755	18517.4
unknown993	0.182589	0.250404	24	18	30527.6	0.403511	0.908997	24.0327	17.9999	73206.7	0.26583	0.403758	24.0163	18	52992.7	8772.84	0.165548	41997	30783	62201	8400	95548	16940	10174	8761	74995	79270	66362	59550	84747	86271	64598	57211	52988
Cer 37:2;3O|Cer 15:2;2O/22:0;O	0.235786	0.306331	24	18	7231.93	0.402696	0.908997	24.1644	12	20767.2	0.318501	0.460719	24.0822	15.0104	15909.1	6722.16	0.422537	11904	10899	18223	2785	26429	9736	4199	4600	24960	20844	20222	17043	21873	24423	18182	18224	15909.1
FA 25:0	0.235786	0.306331	18	9	380.423	0.995414	1	25.2722	6.00001	3819.75	0.574893	0.717418	21.6361	7.9774	3493.94	351.284	0.100541	2857	3033	2940	3272	5147	3141	3190	3801	3404	2961	4152	3776	2932	3080	2955	4671	3457
PC P-34:1 or PC O-34:2	0.235786	0.306331	24	18	7223.8	0.467682	0.934611	28	17.9999	25415	0.353403	0.49494	26	18.1071	20586.4	691.755	0.0336025	15007	14370	22925	7970	32397	15325	10715	10901	26486	25264	23328	22446	29530	27084	23970	21076	20549.6
PE 24:0|PE 12:0_12:0	0.235786	0.306331	18	9	694.732	0.640897	1	20	5.99999	6173.25	0.436679	0.575995	19	7.6	4223.44	1473.35	0.348851	2637	2513	2012	4730	3475	10691	5600	4927	4668	3254	3015	2084	4427	3869	3189	1850	3933.81
PE 28:0|PE 12:0_16:0	0.235786	0.306331	18	6	4212.77	0.293728	0.900865	20	6	15639.5	0.254169	0.395	19	6.01667	10198.9	5749.34	0.563722	6036	4590	6150	10444	8758	22709	16422	14669	9183	8777	5977	5734	10436	9775	7209	5166	9502.19
PI 30:0|PI 14:0_16:0	0.235786	0.306331	18	6	496.389	0.640094	1	20	6	2167.75	0.436321	0.575862	19	6.01667	1520.85	675.477	0.444143	951	1078	831	1700	1226	3563	1892	1990	1560	1269	1020	767	1612	1552	1143	870	1439
unknown1028	0.235786	0.306331	24	18	4252.19	0.791065	1	28	17.9999	17064.7	0.499732	0.641451	26	18.1071	9682.95	1071.35	0.110643	3124	6612	2428	1516	18136	5262	1899	2503	9747	23878	4271	6381	7984	24411	4495	31369	9626
unknown1033	0.235786	0.306331	18	6	631.093	0.880322	1	20	6.00002	3503	0.533927	0.678362	19	6.01667	2890.86	698.765	0.241715	1885	1964	2333	3104	2540	4172	4182	3118	3030	2507	2555	2077	3294	3083	2393	2662	2806.19
unknown1054	0.235786	0.306331	18	6	3886.97	0.19936	0.900865	20	6	7581.75	0.190727	0.33475	19	6.01667	3821.69	3593.81	0.940373	1148	1351	1569	6929	1754	11527	9718	7328	1432	1990	1549	1208	1866	1906	1733	1171	3386.19
unknown1161	0.235786	0.306331	24	18	2799.08	0.373297	0.906507	28	17.9999	9272.25	0.301921	0.445349	26	18.1071	7077.8	410.102	0.057942	5146	4132	7566	2277	11186	5330	3487	2758	9768	8535	8614	7008	10747	10915	7323	8104	7056
unknown1193	0.235786	0.306331	24	18	928.785	0.945077	1	28	17.9999	3245.74	0.557384	0.701417	26	18.1071	1634.12	164.429	0.100622	330	743	0	0	4382	83	0	63	1675	5046	223	478	616	4087	711	7569	1625.38
unknown1252	0.235786	0.306331	24	18	1904.06	0.735394	1	27.3065	12	6455.25	0.477216	0.621073	25.6533	15.2567	5270.39	1233.56	0.234055	3597	4169	4994	1934	9581	3794	2850	2402	8253	6268	6420	4880	8054	6856	5210	5121	5273.94
unknown1312	0.235786	0.306331	24	18	13405.7	0.577596	0.982073	27.8233	17.9999	71870.7	0.407711	0.550067	25.9117	18.0985	61603.2	2273.56	0.0369065	52844	58328	57257	33999	88105	52895	42085	34227	74176	71344	72996	58047	72261	82116	69781	63325	61486.6
unknown1317	0.235786	0.306331	24	18	3643.01	0.284713	0.900865	23.0287	12	9776.25	0.24846	0.390006	23.5144	14.9444	7050.73	3678.99	0.521789	5483	4884	7152	1174	11849	2803	1955	1915	9785	11478	9438	8404	10156	10456	8858	7045	7052.19
unknown1342	0.235786	0.306331	24	18	2350.6	0.837565	1	24.7059	17.9999	7300.5	0.517826	0.662027	24.3529	18.0037	5681.29	503.556	0.0886341	4652	4599	6872	0	11448	532	1589	3127	5437	5899	9663	7791	6460	6849	7982	7911	5675.69
unknown1565	0.235786	0.306331	24	15	4125.26	0.449246	0.926663	22.4427	12	10461.2	0.343731	0.484418	23.2214	13.4648	7651.75	2572	0.336132	6665	4973	9214	838	13849	1756	1054	1053	11245	12728	10489	7383	10762	11128	10157	8605	7618.69
unknown1631	0.235786	0.306331	24	18	2212.18	0.925148	1	28	17.9999	11276.5	0.55028	0.694813	26	18.1071	9486.39	1475.24	0.155511	6360	7172	8566	5325	16992	10819	5978	6178	11196	10972	10206	8167	12380	12374	11536	8816	9564.81
unknown1641	0.235786	0.306331	24	18	4620.77	0.921062	1	23.2718	17.9999	12957.7	0.548811	0.693349	23.6359	18.0042	9936.58	1400.61	0.140955	8761	7248	12024	1796	21585	1749	1775	1417	18677	12541	11550	8309	16325	16530	5933	13043	9953.94
unknown168	0.235786	0.306331	18	6	907.395	0.557456	0.973164	20	5.99999	4087.5	0.39816	0.540741	19	6.01666	2739.63	1446.22	0.527889	1333	1194	2031	2731	2479	6753	3753	3365	2418	2278	1739	1768	3202	2613	2188	1185	2564.38
unknown183	0.235786	0.306331	18	9	1053.41	0.315288	0.900865	20	6	15636.5	0.267559	0.405037	19	7.6	12304.5	2304.98	0.187328	9292	9214	9873	15279	10281	19581	16873	15811	11828	9396	10841	9723	11699	10767	9192	9973	11851.4
unknown309	0.235786	0.306331	24	18	1469.01	0.537321	0.964892	28	17.9999	7687.25	0.388439	0.531412	26	18.1071	6474.27	161.382	0.0249266	5281	5046	7040	3224	8437	6899	3597	4011	8562	7498	7006	6101	8655	8507	7111	6476	6465.69
unknown343	0.235786	0.306331	18	9	2305.52	0.501003	0.953179	20	6.00002	14831.8	0.370452	0.511793	19	7.60001	10017.5	3865.34	0.38586	5364	4843	5520	9908	7555	24075	15819	11878	9824	8628	7145	6023	9943	8977	7923	4697	9257.62
unknown421	0.235786	0.306331	24	15	1310.27	0.76938	1	28	17.9999	4221.75	0.491075	0.634074	26	16.4821	3037.69	88.3361	0.02908	2041	2320	1277	1189	5514	1819	1353	1623	3635	5963	2080	2872	3269	5110	1792	6716	3035.81
unknown629	0.235786	0.306331	24	18	1869.24	0.443426	0.92371	28	17.9999	7511	0.340642	0.482791	26	18.1071	6010.57	43.7012	0.00727073	4344	4416	5956	2801	9130	5585	3509	3040	7756	6809	7202	5540	7610	8904	6391	7139	6008.25
unknown654	0.235786	0.306331	18	6	557.554	0.85313	1	20	6	5404.25	0.523746	0.668581	19	6.01667	5000.31	434.241	0.0868428	4336	4560	4451	5504	5435	5041	5629	5512	5279	4387	4580	4686	5177	5363	4520	4703	4947.69
unknown679	0.235786	0.306331	18	6	1015.94	0.542757	0.964892	20	6	3962	0.391081	0.5334	19	6.01667	2983.13	1042.95	0.349614	1636	1879	2303	3491	2325	5105	4506	3912	2492	2337	2305	2413	3199	2820	2458	2527	2856.75
unknown719	0.235786	0.306331	18	6	2416.89	0.312933	0.900865	20	6.00001	5201.5	0.266114	0.403758	19	6.01667	3099.08	2049.75	0.661405	1334	1388	1518	5164	1641	7559	6067	5539	2039	1838	1847	1397	2107	2420	1895	1858	2850.69
unknown724	0.235786	0.306331	24	18	718.597	0.668857	1	24.4321	17.9999	5509.75	0.448995	0.589687	24.2161	18.0014	4753.14	572.422	0.12043	5046	5368	4596	2880	5794	2975	3324	4011	4389	5996	5060	4509	5082	5801	5648	5508	4749.19
unknown784	0.235786	0.306331	24	18	3196.65	0.787381	1	28	17.9999	12269.5	0.498271	0.640308	26	18.1071	10018.9	456.066	0.0455206	7532	7618	10257	2680	18185	8942	5312	3977	13302	12450	11767	9590	14474	14245	9840	10519	10043.1
unknown805	0.235786	0.306331	18	9	470.58	0.290012	0.900865	20	6.00001	6518	0.251824	0.392873	19	7.6	3562.53	1949.76	0.547296	907	1539	1332	6445	1744	8862	9823	5643	1932	2245	1532	1495	1852	2232	1681	1604	3179.25
unknown921	0.235786	0.306331	24	18	537.578	0.69513	1	28	17.9999	1772.25	0.460317	0.602406	26	18.1071	1101.46	150.895	0.136996	481	814	324	344	1696	562	312	383	1257	2727	515	991	776	2181	802	3330	1093.44
unknown927	0.235786	0.306331	24	18	752.715	0.601286	1	24.8451	17.9999	7945.49	0.418735	0.558562	24.4225	18.0053	6686.8	1115.07	0.166757	6828	7136	6460	5375	5215	5939	6183	4744	7664	6564	7031	5832	11125	8546	6175	5936	6672.06
unknown966	0.235786	0.306331	18	6	2614.53	0.284829	0.900865	20	6	7609	0.248534	0.390006	19	6.01667	4056.16	3643.65	0.898299	919	1402	1406	5084	2261	12506	9115	6554	2297	2315	1849	1867	2625	3254	2309	2071	3614.62
unknown980	0.235786	0.306331	24	18	2832.32	0.447469	0.926663	22.6735	12	10065.8	0.34279	0.483548	23.3368	14.9268	7931.83	3225.7	0.406677	7862	7830	7379	1812	9776	7155	3380	2178	12824	10786	9486	7167	11117	12522	8335	7340	7934.31
unknown991	0.235786	0.306331	24	15	2420.25	0.642055	1	24.1644	12	9847.5	0.437195	0.576337	24.0822	13.5053	7459.79	2492.66	0.334147	5997	6316	5460	2440	9071	9667	3520	2889	15047	10029	8048	6266	10770	11166	7437	5292	7463.44
unknown1300	0.268412	0.348516	24	18	374.767	0.92842	1	28	17.9999	2755.49	0.595462	0.740206	26	18.1071	1315.05	515.857	0.392273	412	893	69	0	2392	71	0	62	625	4514	85	457	460	3458	327	6777	1287.62
CL 64:5|CL 12:0_18:2_16:1_18:2	0.301037	0.372152	18	9	322.794	0.999354	1	28	6.00001	2305.25	0.662205	0.799496	23	8.21429	1925.5	222.455	0.115531	1199	1545	1441	1540	2495	3161	1741	1824	2106	1770	1867	1432	2816	2103	1810	1796	1915.38
Cer 34:3;2O|Cer 14:2;2O/20:1	0.301037	0.372152	24	15	11231.3	0.358905	0.900865	28	17.9999	76793	0.348465	0.489858	26	16.4821	67523.1	10290.5	0.1524	46952	50288	64873	41826	83374	82792	61932	48400	77930	79333	75850	63140	77701	86826	72153	70492	67741.4
DG 32:1	0.301037	0.372152	18	9	1666.3	0.294724	0.900865	20	6	14383.8	0.303631	0.445585	19	7.6	10303.9	2882.74	0.27977	5945	7049	7755	12200	8488	17047	18675	13325	10470	6061	8173	7510	9915	9371	6550	7262	9737.25
PE 26:1|PE 12:0_14:1	0.301037	0.372152	18	6	1456.99	0.176747	0.900865	20	6.00001	3435.75	0.209294	0.352223	19	6.01667	1819.66	1565.6	0.860383	862	871	603	2830	1138	5298	4042	3265	1052	1292	487	689	1275	914	868	593	1629.94
PEtOH 32:2|PEtOH 16:1_16:1	0.301037	0.372152	24	15	1056.42	0.705972	1	28	17.9999	5679	0.54166	0.686078	26	16.4821	4655.49	957.85	0.205746	2875	2869	3721	3482	6816	4642	4084	3599	6547	3926	5290	4246	6712	7122	5355	3527	4675.81
unknown1007	0.301037	0.372152	24	18	1621.57	0.767866	1	28	18	5604.24	0.569722	0.713344	26	18.1071	3395.96	363.657	0.107085	1453	2344	971	881	5840	1756	794	1235	3629	8893	1407	2406	3474	7910	1438	9595	3376.62
unknown1280	0.301037	0.372152	24	6	845.7	0.240373	0.900865	20	5.99998	10960.2	0.262388	0.401541	22	6.04999	6807.21	3511.8	0.515894	4189	5242	3659	11518	4926	15615	11021	12279	4799	4518	4777	4410	5494	4314	4020	4649	6589.38
unknown1283	0.301037	0.372152	18	12	18887.5	0.574632	0.982073	24.0327	12	318556	0.476497	0.620496	21.0163	12.2524	295267	34618	0.117243	259887	285521	314826	239800	344525	308328	281034	306963	340423	274521	339648	319630	310624	212335	286111	257032	292576
unknown1288	0.301037	0.372152	18	6	727.259	0.695617	1	20	5.99999	3993	0.536809	0.68134	19	6.01666	3254.13	801.499	0.246302	2277	2027	2887	3665	3061	4850	4097	3964	2521	3143	3079	2595	3896	3372	2652	2426	3157
unknown132	0.301037	0.372152	18	9	1823.63	0.942535	1	20	5.99999	43830.2	0.641164	0.786135	19	7.6	41101.8	2072.8	0.0504309	35689	36291	38014	47086	38720	45357	45587	45657	41257	37799	40219	39717	44683	38921	37054	39058	40694.3
unknown1330	0.301037	0.372152	18	6	4948.69	0.236333	0.900865	20	6.00001	10468.8	0.259183	0.399359	19	6.01667	5698.23	4657.14	0.817297	1716	2873	2004	9440	3315	16556	11716	10288	2925	2609	3408	2606	3686	3640	2863	2497	5133.88
unknown1395	0.301037	0.372152	24	18	2061.92	0.882882	1	24.2975	17.9999	6318.25	0.617962	0.763945	24.1488	18.0007	5029.99	415.729	0.0826501	3641	4242	6334	682	10148	1138	1572	2245	4616	5053	8498	7006	5583	5965	6695	7030	5028
unknown1418	0.301037	0.372152	24	18	1127.84	0.869527	1	28	17.9999	4034.74	0.612604	0.758156	26	18.1071	2310.34	628.401	0.271995	1225	2985	373	168	4564	728	220	565	2364	4426	972	1702	1927	5174	1253	7785	2276.94
unknown1431	0.301037	0.372152	24	18	1599.48	0.894491	1	28	17.9999	4802.75	0.62257	0.76795	26	18.1071	3856.87	169.495	0.0439463	2672	2761	4429	378	7961	1072	1855	2728	3393	3801	6308	5285	3846	4521	5171	5673	3865.88
unknown1443	0.301037	0.372152	24	18	940.629	0.823793	1	25.8651	17.9999	2950.75	0.593782	0.738527	24.9326	18.0252	2340.26	131.547	0.0562104	1692	1875	2801	278	4379	610	998	1384	2112	2320	3835	3299	2323	2743	3001	3736	2336.62
unknown1455	0.301037	0.372152	18	9	1225.06	0.935138	1	20	6	6733.75	0.63835	0.783969	19	7.6	5270.44	1275.57	0.242024	2795	2146	4304	4996	7836	8308	7644	3147	5546	4192	5718	3213	6149	5572	5070	3679	5019.69
unknown1682	0.301037	0.372152	18	6	3335.07	0.852101	1	20	6.00002	5411.25	0.60552	0.750217	19	6.01668	2739.91	2779.19	1.01434	44	83	107	5093	238	7578	11279	2550	7776	0	269	78	1487	1587	108	173	2403.12
unknown201	0.301037	0.372152	18	9	782.767	0.476659	0.938088	20	6.00001	6681.75	0.422079	0.56069	19	7.60001	5325.04	1169.25	0.219576	3533	4158	3931	6214	4177	8464	8253	5833	5741	4767	4542	4554	4874	5011	3806	3665	5095.19
unknown318	0.301037	0.372152	24	15	2979.04	0.420741	0.911742	28	17.9999	16034	0.388369	0.531412	26	16.4821	13976.5	3027.7	0.216629	9692	9730	12971	7881	18659	17270	12529	10366	16572	17432	14796	12617	17416	17523	14889	14308	14040.7
unknown370	0.301037	0.372152	24	15	19984.6	0.621324	1	28	17.9999	110455	0.500603	0.642202	26	16.4821	95917.2	13307.1	0.138735	65415	71548	95144	49062	141896	109508	77252	59073	118948	107805	105196	96523	120766	130858	96201	93996	96199.4
unknown417	0.301037	0.372152	24	15	1079.58	0.868285	1	28	17.9999	3943.25	0.612103	0.757954	26	16.4821	2956.4	68.7747	0.023263	1844	2924	1450	1334	5177	2034	1593	1517	3472	4638	3180	2343	2468	5064	1779	6462	2954.94
unknown467	0.301037	0.372152	24	15	35813.9	0.706345	1	28	17.9999	192886	0.541834	0.686078	26	16.4821	167007	30139	0.180465	114339	119657	160911	85093	262898	190520	134170	100973	208664	189242	179851	164479	212068	229714	167812	161950	167646
unknown540	0.301037	0.372152	24	15	2249.66	0.763909	1	28	12	13013.5	0.567974	0.71195	26	13.6964	11598.2	1623.36	0.139966	7667	8471	11539	6450	18166	13625	9508	7680	15458	13086	10977	12533	14522	14928	11027	10924	11660.1
unknown574	0.301037	0.372152	18	6	864.438	0.587528	0.990234	20	6	5324.75	0.483265	0.626765	19	6.01667	4241.28	1159.66	0.273421	3430	2768	3542	4287	3809	7297	5325	4868	4447	3122	3855	3147	4194	4228	4044	3249	4100.75
unknown725	0.301037	0.372152	18	9	739.81	0.263828	0.900865	20	6	11593.8	0.280597	0.42052	19	7.6	6869.39	3045.01	0.443272	2991	2896	3673	11830	4056	16666	13898	11755	4893	3879	3485	3539	4435	4477	3367	4493	6270.81
unknown749	0.301037	0.372152	18	9	4854.64	0.98248	1	28	5.99999	36090.5	0.65606	0.797682	23	8.21428	30166.9	4348.26	0.14414	21807	10424	28749	28443	36754	46979	28748	31881	33273	28129	30078	26191	36279	33002	32704	26063	29969
unknown834	0.301037	0.372152	24	12	2716.17	0.841941	1	24.7059	12	12975	0.60134	0.746033	24.3529	12.0025	10425.7	3939.43	0.377859	6908	8973	7068	4849	9245	23371	10833	7675	18410	16171	10977	6342	10934	12298	7748	5742	10471.5
unknown865	0.301037	0.372152	18	6	1256.53	0.194873	0.900865	20	6	3894.5	0.225031	0.365988	19	6.01667	2271.22	1641.91	0.722921	1262	861	1030	2888	1479	5562	4126	4411	1772	1528	1100	1221	1207	1795	1297	1617	2072.25
unknown866	0.301037	0.372152	24	18	6970.66	0.852093	1	28	17.9999	21867	0.605517	0.750217	26	18.1071	15958.2	496.198	0.0310935	12440	15062	5942	3718	31752	10888	4955	7864	23910	28741	9818	13196	13471	26859	15224	31914	15984.6
unknown930	0.301037	0.372152	18	0	654.427	0.631744	1	26.1721	17.9999	3102.25	0.505835	0.648173	22.0861	18.6379	3050.65	591.379	0.193853	4138	3909	2700	4751	2792	2978	2952	1624	2685	2537	3160	2953	2868	2485	3520	3536	3099.25
unknown1266	0.340592	0.420588	24	21	65.7609	0.960903	1	28	17.9999	788.748	0.692828	0.832654	26	19.7321	391.101	123.864	0.316705	251	156	80	69	825	92	0	60	108	1243	0	66	146	1133	182	1694	381.562
unknown1390	0.340592	0.420588	24	18	3341.43	0.950668	1	26.1721	17.9999	10198	0.688915	0.82884	25.0861	18.0338	7962.47	721.252	0.0905814	5634	6350	11104	0	17069	0	3182	4264	7315	7885	12575	10864	8557	9725	11098	11412	7939.62
LPE 18:1	0.380147	0.454436	24	18	27411.9	0.831698	1	28	17.9999	79987.4	0.680229	0.819707	26	18.1071	58056.8	1347.04	0.0232021	44518	51979	22383	12048	114817	38601	17034	25649	91983	109865	34485	46743	48660	102955	51574	116761	58128.4
LPE 18:2	0.380147	0.454436	24	18	18470.3	0.846428	1	28	17.9999	55772.5	0.686628	0.826974	26	18.1071	39694.3	1024.38	0.0258067	29994	37744	15557	7143	76531	23548	10656	16938	56872	79445	22921	33799	34716	68139	30078	90157	39639.9
LPE 20:2	0.380147	0.454436	24	18	302.642	0.94906	1	28	17.9999	952.249	0.728593	0.867316	26	18.1071	671.043	19.6272	0.0292488	478	796	237	158	1512	374	144	288	929	1034	349	612	707	954	674	1474	670
PE 26:0|PE 12:0_14:0	0.380147	0.454436	18	6	2096.22	0.291345	0.900865	20	6	5786.5	0.354462	0.495805	19	6.01667	3466.53	2302.6	0.664237	1883	1905	1383	4940	2289	9259	6321	5277	2698	2570	1700	1814	3007	2320	2016	1618	3187.5
PE 40:1|PE 22:0_18:1	0.380147	0.454436	18	6	1445.86	0.529777	0.964654	20	6	6234	0.524125	0.668581	19	6.01667	3939.05	2348.17	0.596126	1780	2362	1846	5014	2867	10988	6484	4597	2934	2626	2934	1902	3564	3610	2836	2128	3654.5
PI 32:3|PI 14:1_18:2	0.380147	0.454436	24	15	208.597	0.985179	1	28	6	1959.5	0.742333	0.879692	26	10.9107	1774.34	161.435	0.0909832	1458	1497	1468	1379	2675	2283	1493	1387	2002	2084	1791	1512	2362	1880	1597	1730	1787.38
unknown1012	0.380147	0.454436	24	18	2644.4	0.593111	0.994424	25.5652	17.9999	9979.5	0.561322	0.705187	24.7826	18.0179	7746.63	862.106	0.111288	4253	9816	8039	841	8556	9577	2742	2403	11569	6754	11710	7443	9927	11142	9089	9760	7726.31
unknown1057	0.380147	0.454436	18	6	1714.03	0.344959	0.900865	20	6	4873.25	0.39754	0.540568	19	6.01667	3005.98	1872.58	0.622951	1302	1808	1402	4168	1922	7439	5646	4486	2063	2364	1852	1333	3060	2137	1555	1928	2779.06
unknown1094	0.380147	0.454436	24	18	899.617	0.753327	1	20.9501	12	4069.75	0.644474	0.789331	22.4751	14.8649	2916.29	1487.49	0.510064	2826	3002	2334	851	2873	2758	1220	1111	7551	3465	3148	2115	3737	4890	2874	2022	2923.56
unknown1168	0.380147	0.454436	24	15	1269.26	0.826747	1	27.6489	12	5483.25	0.678057	0.817528	25.8245	13.6742	4507.27	1075.5	0.238614	2807	4074	3746	1790	5297	7370	2959	2152	7146	5933	5568	3286	6068	6740	4575	3202	4544.56
unknown1227	0.380147	0.454436	18	9	1743.9	0.896924	1	28	5.99999	7731.25	0.707833	0.848417	23	8.21428	6600.18	984.55	0.14917	3987	4514	5249	3696	9596	10214	6153	4962	7398	6927	6740	5531	9561	7409	6744	6205	6555.38
unknown1340	0.380147	0.454436	24	18	1372.14	0.911574	1	28	17.9999	5740.49	0.71378	0.855089	26	18.1071	3787.08	1013.89	0.267723	2354	6342	1375	777	5809	2574	1022	1358	2334	6469	2739	3616	4133	7049	2078	9702	3733.19
unknown1356	0.380147	0.454436	24	18	1233.19	0.860737	1	28	17.9999	5017.99	0.69275	0.832654	26	18.1071	3304.12	592.41	0.179295	2047	4569	1222	783	5247	2312	1146	1401	2567	5697	2251	3048	3292	6175	2172	8433	3272.62
unknown1364	0.380147	0.454436	24	18	1440.73	0.921367	1	28	17.9999	3143	0.717706	0.85796	26	18.1071	1993.23	180.249	0.0904307	898	1350	417	0	5294	665	213	497	3841	4638	460	1200	1452	4027	1325	5768	2002.81
unknown1409	0.380147	0.454436	18	9	1297.19	0.999188	1	28	6	5396.75	0.747526	0.8826	23	8.21429	4026.09	865.745	0.215034	2151	2739	1980	2363	8361	6573	3981	2672	5854	3432	3029	2276	4374	6629	3825	3548	3986.69
unknown1441	0.380147	0.454436	24	15	2910.1	0.556293	0.973164	21.6708	12	12040	0.54003	0.684567	22.8354	13.4585	9054.69	3379.87	0.373273	7567	7182	9592	2688	13009	6629	4856	4834	16153	12102	10419	9486	12499	12376	7714	6779	8992.81
unknown1469	0.380147	0.454436	24	18	2847.87	0.985997	1	28	18	11015.5	0.742639	0.879692	26	18.1071	8522.19	55.3411	0.00649376	6723	10489	3315	3472	17850	5048	2833	4616	12886	12350	5442	7222	7204	12354	7747	16757	8519.25
unknown1482	0.380147	0.454436	24	18	54723.2	0.95997	1	28	17.9999	180056	0.732798	0.870439	26	18.1071	135439	617.229	0.00455725	112213	165327	49349	28121	293178	79967	33145	64076	209254	203959	89757	117928	127671	204712	128836	259006	135406
unknown1534	0.380147	0.454436	24	15	4729.13	0.760931	1	26.1721	12	35478	0.648074	0.792351	25.0861	13.5904	30601.9	5624.31	0.18379	24096	19369	34517	20327	32778	28047	27658	32201	38936	21044	46054	35878	41447	26711	31657	30737	30716.1
unknown384	0.380147	0.454436	18	6	4591.95	0.370731	0.905649	20	6.00001	12453.5	0.417086	0.556693	19	6.01667	8357.97	4038.18	0.483153	4490	4428	5360	12749	5778	17669	13978	12389	6218	6799	5527	4977	6798	6543	6556	5639	7868.62
unknown522	0.380147	0.454436	24	18	619.779	0.591959	0.993616	28	17.9999	3214.75	0.56067	0.704761	26	18.1071	2650.31	90.4588	0.0341314	2283	3038	1687	1393	3369	2648	1500	1907	3603	3257	2561	2223	3090	3527	2571	3671	2645.5
unknown537	0.380147	0.454436	18	9	357.796	0.786609	1	20	5.99999	5477	0.660019	0.799006	19	7.59999	4862.41	469.464	0.0965497	4335	3447	4079	5840	4472	6073	5783	5580	4846	4172	4383	4825	4508	4588	4559	4832	4770.12
unknown636	0.380147	0.454436	24	18	7341.89	0.848844	1	28	17.9999	31428.7	0.687668	0.827783	26	18.1071	18738.6	951.12	0.0507573	7513	14443	5346	3357	35894	12341	4502	6918	17489	44824	7114	13552	15370	42270	11719	56356	18688
unknown691	0.380147	0.454436	18	6	3415.86	0.234278	0.900865	20	6.00001	7164.75	0.304447	0.446138	19	6.01667	3665.3	3394.1	0.92601	1126	1106	1506	6234	1553	10167	10361	6578	1748	1351	1604	1452	1830	2642	1689	1117	3254
unknown734	0.380147	0.454436	24	18	1079.4	0.727514	1	28	17.9999	4211.75	0.632033	0.77834	26	18.1071	3191.23	66.5567	0.0208562	2504	3272	1602	1721	4724	3105	1802	1849	4640	4691	1971	2275	3828	4766	3367	4886	3187.69
unknown806	0.380147	0.454436	24	9	269.761	0.5391	0.964892	20	5.99999	3221.25	0.529774	0.673848	22	7.425	2669.97	388.327	0.145443	2465	2093	2229	2839	2591	4029	3351	2914	2846	2205	2756	2130	2848	2834	2116	1952	2637.38
unknown888	0.380147	0.454436	24	15	1004.98	0.933692	1	28	17.9999	4261.99	0.72259	0.861987	26	16.4821	2814.78	372.695	0.132406	1295	2310	682	622	5709	2439	912	1009	2421	7171	1377	2168	2084	5840	1698	7426	2822.69
CL 72:9|CL 18:2_18:2_18:2_18:3	0.475047	0.549166	18	9	479.595	0.997176	1	28	5.99999	3490.5	0.827644	0.950081	23	8.21428	2981.94	362.643	0.121613	1684	2873	2372	2262	4838	3825	2852	2447	3261	3055	2826	2462	3998	2935	2726	3031	2965.44
FA 18:2 (linoleic acid)	0.475047	0.549166	18	9	113043	0.996083	1	28	6	1.13044e+06	0.827256	0.950081	23	8.21429	1.00917e+06	53049.3	0.0525674	736583	889419	778138	838282	1446421	1186082	964660	924602	922216	938427	896027	995858	1131601	1201526	1113122	1145062	1.00675e+06
LPC 17:1	0.475047	0.549166	24	15	587.606	0.935741	1	28	17.9999	2950.75	0.80492	0.934634	26	16.4821	2178.91	172.434	0.0791378	1670	2518	1216	867	3417	1821	1120	1033	1877	3523	1851	2088	1677	3985	1464	4677	2175.25
LPG 18:1	0.475047	0.549166	24	18	184.378	0.995422	1	28	17.9999	726.249	0.827021	0.950081	26	18.1071	505.922	91.4242	0.180708	338	829	125	163	1129	215	77	144	423	953	298	418	534	760	268	1343	501.062
PE-Cer 34:2;3O|PE-Cer 18:2;2O/16:0;O	0.475047	0.549166	24	18	23170.5	0.832994	1	28	17.9999	172354	0.762564	0.897486	26	18.1071	151718	14912.7	0.0982921	120364	140218	132584	95312	224335	166765	114449	116435	175031	168020	157233	140014	165403	195005	169244	159766	152511
PI 34:3|PI 16:1_18:2	0.475047	0.549166	24	18	23038.6	0.982431	1	28	17.9999	156488	0.822358	0.950081	26	18.1071	135699	7091.39	0.0522582	113163	124148	131453	80195	216963	134121	99035	91841	155901	150303	134411	119728	181739	168800	157340	118075	136076
unknown1064	0.475047	0.549166	24	15	1473.61	0.820588	1	21.4599	12	10174.8	0.757056	0.891705	22.7299	13.4582	7904.59	2805.67	0.354942	6467	6449	8088	3569	11644	7858	5781	4539	13648	12285	8303	6463	9102	10058	6684	4653	7849.44
unknown1065	0.475047	0.549166	24	18	217.789	0.954165	1	28	17.9999	3625.99	0.81193	0.940549	26	18.1071	1570.25	874.684	0.557037	118	1003	0	0	1960	0	0	77	284	6131	0	303	308	3393	96	10707	1523.75
unknown1148	0.475047	0.549166	24	15	878.58	0.747221	1	28	17.9999	5132.5	0.722615	0.861987	26	16.4821	4283.63	568.712	0.132764	3984	4030	4355	1937	5191	4646	3031	1971	5420	4716	4468	4066	6441	5944	4396	3749	4271.56
unknown1158	0.475047	0.549166	18	9	270.822	0.695783	1	20	5.99998	3957.75	0.696446	0.836554	19	7.59999	3365.97	509.847	0.151471	2851	2659	2673	4011	2669	5023	4661	3478	3310	3031	3461	2974	3142	3128	3084	2097	3265.75
unknown1178	0.475047	0.549166	24	15	6619.93	0.850731	1	22.2166	12	26158.8	0.770286	0.903969	23.1083	13.4622	20106.3	6304.9	0.313579	18887	25084	13062	3939	15353	29440	9893	6609	36441	31889	23003	13302	27355	32332	21497	12149	20014.7
unknown1234	0.475047	0.549166	24	18	1632.71	0.950561	1	28	17.9999	5796.5	0.810573	0.939946	26	18.1071	4743.42	20.7714	0.004379	2915	3659	6365	964	8929	1515	2590	3533	4021	4436	7457	6307	4353	5470	6676	6687	4742.31
unknown1250	0.475047	0.549166	24	18	566.393	0.907865	1	28	17.9999	1373.75	0.793984	0.925231	26	18.1071	970.476	13.666	0.0140817	789	896	235	57	2214	471	0	283	1810	2099	488	679	905	1721	620	2249	969.75
unknown1276	0.475047	0.549166	24	18	914.112	0.802666	1	23.0287	17.9999	3003.75	0.748942	0.883539	23.5144	18.0076	2374.31	332.303	0.139957	1713	2219	3393	355	3882	514	1015	1259	2179	2346	3853	3335	2430	2550	3169	3866	2379.88
unknown1311	0.475047	0.549166	24	6	316.43	0.288609	0.900865	20	6	3799.75	0.409529	0.550865	22	6.05	2401.2	1159.87	0.483037	1475	1893	1366	4243	1741	5608	3742	4108	1672	1514	1730	1654	1913	1595	1313	1701	2329.25
unknown1332	0.475047	0.549166	24	18	2628.67	0.891281	1	26.9725	17.9999	8073.5	0.787287	0.919115	25.4862	18.0614	6497.8	118.278	0.0182028	4061	4750	8950	372	12915	1509	3140	3932	6501	6648	10043	8771	7197	8134	8977	7986	6492.88
unknown1335	0.475047	0.549166	24	18	1420.58	0.999939	1	28	12	4567.25	0.828623	0.950081	26	15.3214	3924.16	103.153	0.0262868	2249	2540	4822	1096	11674	1561	1143	1704	3430	3486	5740	5613	3702	3097	5221	5715	3924.56
unknown1429	0.475047	0.549166	24	12	1171.15	0.813831	1	24.5682	12	8314.5	0.754019	0.888594	24.2841	12.0016	6847.55	1745.28	0.254876	5472	5511	7239	2787	9293	8253	6702	5037	11680	8760	7067	5751	8065	8639	5210	4356	6863.88
unknown1569	0.475047	0.549166	18	6	1515.51	0.313018	0.900865	20	6	4014	0.432093	0.570617	19	6.01667	2679.92	1288.24	0.4807	1468	1867	1476	4172	2218	5767	4055	4016	2140	1769	1875	1514	2631	2217	1848	1348	2523.81
unknown1614	0.475047	0.549166	24	18	714.178	0.918332	1	28	17.9999	2684.24	0.798138	0.929367	26	18.1071	1550.61	437.066	0.281867	725	2340	272	109	2861	763	179	394	1117	3352	606	983	1320	3915	724	4778	1527.38
unknown1647	0.475047	0.549166	24	18	3424.52	0.996452	1	28	17.9999	9987.49	0.827387	0.950081	26	18.1071	6681.58	845.12	0.126485	3271	7107	666	241	21971	1279	277	1014	13587	12926	1846	3489	3812	12609	4485	19044	6726.5
unknown1654	0.475047	0.549166	18	12	943.28	0.998073	1	20	12	6121.75	0.827962	0.950081	19	12.0333	4908.18	1529.43	0.311608	6129	4386	7450	2171	6575	4772	2937	3347	5815	4353	7497	6822	5516	1742	3139	2989	4727.5
unknown1672	0.475047	0.549166	24	18	524.32	0.991765	1	28	17.9999	1435.75	0.825716	0.950081	26	18.1071	970.877	25.8343	0.0266092	578	1161	137	96	2607	357	108	276	1394	2174	365	560	591	2080	589	2483	972.25
unknown1685	0.475047	0.549166	24	18	1014.7	0.998579	1	28	17.9999	3693.25	0.828142	0.950081	26	18.1071	2430.6	164.994	0.0678818	1073	3022	274	28	7916	341	96	284	3457	5775	720	1271	1363	4443	1211	7756	2439.38
unknown199	0.475047	0.549166	24	18	1518.87	0.854802	1	28	17.9999	22345	0.772033	0.905073	26	18.1071	20703.8	267.803	0.012935	19885	19709	21026	14135	22459	25079	17849	15121	22141	21197	22261	21247	22705	22028	22421	22226	20718.1
unknown346	0.475047	0.549166	18	9	930.906	0.798504	1	20	6	17558	0.74703	0.8826	19	7.6	15909.9	1293.67	0.0813123	14384	13597	13956	18029	13431	21149	18327	17325	15330	14392	15462	15638	15783	14870	14690	14127	15655.6
unknown358	0.475047	0.549166	24	15	1679.73	0.856387	1	27.6489	12	13371.5	0.772712	0.905395	25.8245	13.6742	11870	1895.11	0.159655	8751	8290	13279	6482	16990	15456	9319	8294	15982	13841	12370	11293	14742	13558	11987	10338	11935.8
unknown485	0.475047	0.549166	24	18	1860.4	0.860886	1	28	17.9999	6071	0.774628	0.906694	26	18.1071	4661.62	398.727	0.0855341	3466	4357	2361	836	9096	3377	1804	2560	6767	8643	3258	4116	3733	7172	4191	9188	4682.81
unknown527	0.475047	0.549166	18	6	2472.58	0.200434	0.900865	20	6	9086.25	0.319126	0.461325	19	6.01667	4799.61	4370.95	0.91069	1714	1576	2168	5231	2550	14184	10827	8784	2509	2764	2587	2321	2960	3650	2803	1691	4269.94
unknown529	0.475047	0.549166	24	18	7721.96	0.838967	1	28	17.9999	39094.9	0.765184	0.899863	26	18.1071	22947.3	5334.51	0.232468	11442	21929	7273	3872	33583	13532	6078	6484	16119	59498	9691	16739	17664	54101	11085	73530	22663.8
unknown843	0.475047	0.549166	18	9	644.528	0.464434	0.934611	20	6	5075.5	0.554058	0.698406	19	7.6	3346.33	1294.11	0.386726	1346	2174	1929	4035	1639	7779	6324	4560	2672	2183	2780	2347	2219	3057	2609	1818	3091.94
unknown902	0.475047	0.549166	18	6	2386.84	0.260933	0.900865	20	6	6119.25	0.382754	0.525555	19	6.01667	3629.71	2379.38	0.65553	1792	2419	1654	5806	2135	9252	7538	5552	2201	1941	1636	2656	1935	2757	2280	1908	3341.38
unknown1043	0.531352	0.612994	24	18	301.935	0.967153	1	28	17.9999	1154	0.856016	0.975511	26	18.1071	589.297	111.409	0.189055	179	633	59	0	1616	113	0	81	540	1004	66	427	430	1467	217	2502	583.375
unknown1048	0.531352	0.612994	24	15	1160.72	0.993181	1	27.1385	12	4242.5	0.865039	0.982799	25.5692	13.6435	3624.87	532.609	0.146932	2253	2579	5576	956	6765	1182	2376	2704	3221	3336	5649	4764	3221	3899	4643	5127	3640.69
unknown1205	0.531352	0.612994	24	15	452.548	0.895742	1	28	17.9999	2996.49	0.829319	0.950393	26	16.4821	1250.67	358.437	0.286597	0	398	53	0	1999	136	59	0	776	4276	0	206	323	3694	156	7813	1243.06
LPA 17:1	0.587657	0.659316	18	6	932.32	0.992378	1	20	6.00001	5773.5	0.897664	1	19	6.01667	3888.66	1783.82	0.458723	4111	1366	6561	1288	2679	14395	2690	3330	4584	1247	1835	1286	1543	4592	2521	4732	3672.5
LPC 16:2/0:0	0.587657	0.659316	24	18	325.976	0.949159	1	28	17.9999	1990.75	0.883407	0.998854	26	18.1071	1449.23	161.855	0.111683	963	1891	918	682	1875	1423	997	768	1009	2449	968	1144	1566	2368	1020	3009	1440.62
LPC 18:2	0.587657	0.659316	24	18	101466	0.889201	1	28	17.9999	469178	0.8617	0.980495	26	18.1071	269162	64637.9	0.240145	116609	270150	79424	34480	439814	142626	52330	61761	165813	702141	103545	206214	198927	618483	107662	951643	265726
PEtOH 34:3|PEtOH 16:1_18:2	0.587657	0.659316	24	18	1097.43	0.830465	1	28	17.9999	6459.5	0.838131	0.958535	26	18.1071	5502.74	468.149	0.0850757	3799	4005	5150	4210	8243	5366	4680	3894	6616	5153	6297	5191	7435	7384	6637	4382	5527.62
PI 34:4|PI 16:1_18:3	0.587657	0.659316	24	18	2041.06	0.998652	1	28	6	15851.5	0.899641	1	26	25.5357	14981.9	669.056	0.0446575	11594	14634	13452	9295	26548	14981	11577	10300	16154	16174	16061	13410	19298	15645	16600	14622	15021.6
TG 38:1|TG 12:0_12:0_14:1	0.587657	0.659316	24	15	221492	0.903922	1	21.8859	12	1.04257e+06	0.867244	0.984308	22.9429	13.4595	801909	260381	0.324702	717853	981643	577950	193895	677938	1149388	398324	268886	1536778	1278657	850547	504291	1016537	1309374	846638	451589	797518
unknown1030	0.587657	0.659316	24	15	9266.63	0.882685	1	25.7143	12	41502.8	0.859201	0.978168	24.8571	13.5679	32531.9	10587	0.325435	22858	31127	23390	9593	38240	57154	18409	14378	58456	48474	35841	23240	39679	50535	29008	22820	32700.1
unknown1051	0.587657	0.659316	24	18	1934.82	0.798114	1	21.5648	12	8448.25	0.824118	0.950081	22.7824	14.8822	6852.03	2410.15	0.351743	6424	5644	8597	2764	11643	3931	2668	2455	8454	9066	8341	7932	9149	6460	8067	8150	6859.06
unknown1113	0.587657	0.659316	24	18	1010.1	0.882732	1	22.4427	17.9999	3927.5	0.859219	0.978168	23.2214	18.0202	3185.11	424.886	0.133398	2542	3020	4731	525	5471	886	1175	1665	2989	3353	4917	4166	3612	3607	4287	4204	3196.88
unknown1129	0.587657	0.659316	24	15	90842.4	0.900466	1	21.6708	12	431640	0.865955	0.983343	22.8354	13.4585	333930	106372	0.318545	307050	408674	243466	88375	286423	468627	158876	119296	631143	522225	360597	212595	424842	537823	352162	189548	331983
unknown1269	0.587657	0.659316	24	18	6279.46	0.750839	1	21.5648	12	23930.2	0.802245	0.933181	22.7824	14.8822	17552.5	9597.24	0.546772	19156	18516	12797	3661	17197	14670	6451	5101	44404	21626	17132	12559	24744	34485	17576	11214	17580.6
unknown1279	0.587657	0.659316	24	18	2321.96	0.892757	1	22.9091	17.9999	7623.25	0.863052	0.981536	23.4545	18.0097	5998.7	976.78	0.162832	4510	5333	9386	908	10438	1305	2083	2905	5099	5952	9578	8285	6283	6646	8485	9079	6017.19
unknown1296	0.587657	0.659316	18	9	493.384	0.995138	1	28	6.00001	3829.25	0.898537	1	23	8.21429	3306.32	346.242	0.104721	1878	2853	2398	3336	4956	4067	3088	3206	3521	2877	3129	3209	3084	3760	3484	3803	3290.56
unknown1315	0.587657	0.659316	18	6	252.437	0.999999	1	20	5.99998	1602.75	0.900062	1	19	6.01666	1424.77	214.234	0.150364	1359	1691	621	1028	2428	1715	1096	1172	745	1669	698	1039	1493	1879	917	2831	1398.81
unknown1325	0.587657	0.659316	18	6	7238.48	0.200747	0.900865	20	6.00001	14065.2	0.370111	0.511637	19	6.01667	7956.6	5771.69	0.725396	3126	5144	3101	14374	4737	19554	15437	16533	4115	3595	5019	3994	4762	4810	3915	3899	7257.19
unknown1327	0.587657	0.659316	24	15	2171.52	0.985868	1	28	12	8103.5	0.895589	1	26	13.6964	6874.36	1252.32	0.182173	4200	4654	9522	1750	14177	2933	4503	5034	6846	6485	10334	8749	7055	8180	8681	7650	6922.06
unknown1420	0.587657	0.659316	24	15	25591.3	0.941208	1	28	17.9999	225188	0.88066	0.996513	26	16.4821	199972	28643	0.143235	153849	194161	179347	115643	310977	220903	169002	120649	215223	208058	217035	203676	231985	255337	205509	207921	200580
unknown169	0.587657	0.659316	18	9	622.254	0.507582	0.957437	20	6	10314	0.659121	0.798558	19	7.6	8485.14	1336.7	0.157535	6155	6451	7284	10102	6992	12682	10820	10762	8178	7090	7973	6918	8918	7606	7188	6439	8222.38
unknown616	0.587657	0.659316	24	15	9468.87	0.806902	1	23.0287	12	43600.2	0.827999	0.950081	23.5144	13.4748	35824	7342.74	0.204967	33781	40349	31433	9866	37663	46487	18406	13102	54784	49833	40034	29750	46299	53571	40046	26809	35763.3
unknown739	0.587657	0.659316	24	18	4626.6	0.814629	1	28	17.9999	15009.5	0.831366	0.951557	26	18.1071	10959.7	361.835	0.0330151	8877	10333	5043	2164	19491	7225	3355	5161	15234	21046	6843	10237	9524	18632	8116	23766	10940.4
unknown766	0.587657	0.659316	24	15	9346.54	0.908209	1	22.2166	12	45995	0.868831	0.985114	23.1083	13.4622	36768.9	9659.86	0.262718	33724	43635	29869	9874	33188	52510	19600	13623	63139	54176	40832	25833	46856	56471	39549	23178	36628.6
unknown781	0.587657	0.659316	24	18	695.793	0.950249	1	28	17.9999	2619.25	0.88378	0.998854	26	18.1071	1862.1	15.7104	0.00843691	1382	1630	898	583	3696	1266	707	930	2474	3523	1044	1197	1497	3261	1410	4309	1862.94
unknown845	0.587657	0.659316	24	18	95079.5	0.857167	1	28	17.9999	413793	0.849139	0.969149	26	18.1071	240101	32192.5	0.134079	99604	209318	59605	29500	432652	134251	53252	73759	202147	604322	94197	166452	179269	580763	122791	772354	238390
CL 70:7|CL 16:1_18:2_18:2_18:2	0.719948	0.784223	18	9	12697.5	0.907141	1	28	6	75796.2	0.931334	1	23	8.21429	71161.2	6587.05	0.0925651	50045	65831	60267	49847	97099	93388	63406	49292	85407	74483	77276	62391	89324	77506	67753	70468	70861.4
Cer 34:2;3O|Cer 17:1;2O/17:1;(3OH)	0.719948	0.784223	24	18	8390	0.918837	1	28	17.9999	81545	0.934868	1	26	18.1071	71730.4	335.341	0.00467502	58208	77585	68120	43025	98077	79720	51310	45771	75157	77501	80994	66324	77917	90184	78168	79911	71748.2
Cer 38:0;3O|Cer 16:0;2O/22:0;(2OH)	0.719948	0.784223	18	9	824.84	0.970904	1	28	6.00001	4898.25	0.949315	1	23	8.21429	4251.47	387.99	0.0912601	2634	3087	2974	3240	6800	5641	3587	3565	4464	4107	3985	3519	4960	5607	4729	4842	4233.81
LPE 18:3	0.719948	0.784223	24	18	646.296	1	1	20	6	9301.5	0.956506	1	22	11.55	8779.8	277.816	0.0316427	7736	11748	5061	8648	16067	7486	6902	6751	7200	9232	9029	7832	9393	9546	7854	10301	8799.12
PG 30:1|PG 14:0_16:1	0.719948	0.784223	24	18	330.219	0.828873	1	28	17.9999	1619.25	0.904824	1	26	18.1071	1329.09	85.2371	0.0641317	1069	1120	1049	627	2044	1415	776	849	1968	1529	1307	1108	2085	1908	1533	951	1333.62
PG 36:4|PG 18:2_18:2	0.719948	0.784223	18	9	831.558	0.993429	1	28	6.00002	4722.25	0.954936	1	23	8.21429	4035.57	495.979	0.122902	2275	3626	2868	2748	6843	5298	3535	3213	4676	3983	3927	3109	5414	5051	4199	3443	4013
unknown1067	0.719948	0.784223	18	6	206.475	0.99466	1	28	5.99999	2554.5	0.955232	1	23	6.29761	2493.63	3.34701	0.00134222	2868	2069	1879	2219	2910	2560	2501	2247	2472	2053	2107	2539	3328	2965	2701	2482	2493.75
unknown1105	0.719948	0.784223	18	6	908.809	0.398954	0.908997	20	6	3685	0.645537	0.789771	19	6.01667	2494.79	1147.91	0.460121	1543	1945	1815	3132	1432	5525	4470	3313	2025	1914	1732	1165	2259	2249	1807	1365	2355.69
unknown1120	0.719948	0.784223	24	18	710.289	0.994495	1	24.7059	12	2893	0.955193	1	24.3529	15.0466	2478.6	514.506	0.20758	1764	1877	3744	745	4525	963	1399	1766	2307	2251	4029	2985	2611	2752	3043	2898	2478.69
unknown1136	0.719948	0.784223	24	18	108.187	0.988413	1	28	17.9999	452.75	0.953716	1	26	18.1071	290.445	38.934	0.13405	240	184	81	77	635	71	0	103	316	905	63	128	208	471	96	1036	288.375
unknown1149	0.719948	0.784223	24	18	494.975	0.973512	1	28	17.9999	1725.75	0.949985	1	26	18.1071	1088.36	9.10454	0.00836538	705	1025	75	0	2688	424	123	221	1414	2971	366	491	541	2355	628	3379	1087.88
unknown1155	0.719948	0.784223	24	15	22476.8	0.92932	1	22.4427	12	103868	0.937944	1	23.2214	13.4648	81531.7	23508.2	0.288332	72777	96999	60668	21281	72459	121326	40188	28914	151562	125236	87601	51075	104405	129365	89993	45823	81229.5
unknown1208	0.719948	0.784223	24	18	1768.3	0.944126	1	24.7059	17.9999	6556.5	0.942143	1	24.3529	18.0038	5398	410.049	0.0759632	3877	4640	7593	1067	9297	1462	2578	3964	4453	5166	8216	7756	5070	6051	7291	7814	5393.44
unknown1253	0.719948	0.784223	24	3	95.813	0.9595	1	27.8233	4.79e-05	2776.5	0.946327	1	25.9117	1.6195	2627.12	106.162	0.0404102	2583	3123	2571	2829	2847	2736	2417	2530	2507	2243	2651	2714	2750	2339	2433	2729	2625.12
unknown1297	0.719948	0.784223	18	6	8063.49	0.999995	1	28	6	75902.8	0.956505	1	23	6.29762	69060.1	6189.51	0.089625	51006	69578	52680	64957	85014	90152	68647	59798	70127	74565	63208	52427	83729	75761	75658	64242	68846.8
unknown1351	0.719948	0.784223	24	15	967.676	0.835721	1	20.1831	12	6862	0.907349	1	22.0915	13.4709	5382.19	1809.29	0.336163	5224	4710	5915	2028	6796	5412	3398	3243	9639	7175	6197	4437	6259	6676	4923	3324	5334.75
unknown1382	0.719948	0.784223	18	9	4969.55	0.98631	1	28	6.00001	33427	0.9532	1	23	8.21429	28870.3	2175.6	0.0753579	17490	24151	20125	21055	46114	34570	26759	26265	26599	25514	24912	28724	35322	36164	31331	35245	28771.2
unknown1411	0.719948	0.784223	24	18	2935.55	0.957975	1	24.8451	17.9999	8734.5	0.94592	1	24.4225	18.0054	7108.65	432.264	0.0608081	4646	5661	10470	673	14211	1677	2835	3805	6302	6975	11337	10117	6998	8819	9721	9400	7102.94
unknown1430	0.719948	0.784223	24	15	560.912	0.953745	1	20	12	4939	0.944782	1	22	13.475	4097.16	1046.91	0.255522	3620	3120	5555	2203	4869	3946	2556	3458	4388	3262	6443	5663	5308	3232	3480	4001	4069
unknown1546	0.719948	0.784223	24	18	215.668	0.999771	1	28	17.9999	782.499	0.956452	1	26	18.1071	540.563	27.0372	0.0500167	425	656	136	83	1599	248	89	158	659	1033	160	296	504	851	397	1378	542
unknown1579	0.719948	0.784223	24	18	1626.35	0.996307	1	28	17.9999	6401.25	0.955627	1	26	18.1071	4962.15	89.9122	0.0181196	3843	6871	1949	1452	10972	2883	1327	2290	6058	8548	3244	4276	4167	7848	3725	9865	4957.38
unknown1617	0.719948	0.784223	24	15	1190.94	0.943323	1	21.995	12	5577.25	0.94192	1	22.9975	13.4602	4724.83	819.474	0.17344	4625	4065	6098	1667	8241	2811	1819	2009	5843	6078	5219	5169	6284	4676	5777	5005	4711.62
unknown1659	0.719948	0.784223	24	15	3245.27	0.855355	1	20.1831	12	16889.5	0.914365	1	22.0915	13.471	13082.8	4596.22	0.351319	13527	7917	17386	5451	15685	5958	7186	11311	20184	8410	21768	17196	21001	8680	13241	12495	12962.2
unknown1666	0.719948	0.784223	24	15	1190.41	0.874556	1	21.253	12	5081.75	0.920913	1	22.6265	13.4585	3788.06	1446.37	0.381824	3154	4600	2658	1255	3010	5479	1626	869	7849	6054	4013	2411	4794	6624	3757	1972	3757.81
unknown1710	0.719948	0.784223	24	15	3952.73	0.999205	1	21.6708	12	18028	0.956318	1	22.8354	13.4585	14460.3	4213.51	0.291384	15360	9308	17533	4379	32562	6922	5054	7858	24136	9957	20458	17561	17788	10853	15098	15304	14383.2
unknown809	0.719948	0.784223	24	15	1042.28	0.900368	1	28	17.9999	5987.49	0.929239	1	26	16.4821	3683.21	446.089	0.121114	1679	3757	1279	710	5044	3074	1281	1527	2913	9200	1558	2808	2700	7807	1687	11756	3673.75
unknown877	0.719948	0.784223	24	15	1178.22	0.923798	1	26.3284	12	6890.25	0.936334	1	25.1642	13.5985	5719.74	1399.03	0.244597	4297	5897	4540	2118	6757	9133	3896	3206	8873	8329	6221	4138	7238	7954	5292	4115	5750.25
CL 72:8|CL 18:2_18:2_18:2_18:2	0.873774	0.932331	18	9	6995.58	0.949347	1	28	6.00002	38419.2	0.984563	1	23	8.21429	34715.3	4046.68	0.116568	19554	32282	29466	22998	55095	44831	29091	24660	39430	35824	37861	31028	42630	39561	33352	34835	34531.1
FA 19:1	0.873774	0.932331	24	18	406.586	0.995491	1	28	5.99999	2550.75	0.991135	1	26	25.5357	2177.37	38.9687	0.0178972	1220	1664	1579	1513	4050	2620	1958	1575	2412	1669	1864	2183	2553	2787	2383	2771	2175.06
LPC 15:3	0.873774	0.932331	24	15	526.618	0.984515	1	28	17.9999	2787.75	0.989744	1	26	16.4821	2298.27	343.576	0.149493	1865	2333	1393	846	4100	2459	987	1642	2791	3746	1657	1919	2003	3108	1871	4169	2305.56
LPC 18:3	0.873774	0.932331	24	15	1468.31	0.979192	1	28	17.9999	8758.99	0.989032	1	26	16.4821	6408.19	571.478	0.0891794	4140	7456	3139	2447	9577	6607	4177	3492	4569	11654	4186	6245	5757	11189	3364	14726	6420.31
LPC 20:2	0.873774	0.932331	24	15	321.91	0.976819	1	28	17.9999	1794	0.988706	1	26	16.4821	1353.47	281.42	0.207925	917	1325	788	511	2069	1841	517	996	1358	2068	754	1431	1147	2027	1033	2969	1359.44
PI 30:1|PI 14:0_16:1	0.873774	0.932331	24	15	2415.83	0.946761	1	28	17.9999	14400.7	0.984138	1	26	16.4821	12738.3	628.124	0.0493098	12487	11725	11812	6684	17892	14162	7755	7372	16327	15533	13439	10809	18192	15504	13031	10876	12725
PI 32:2|PI 16:1_16:1	0.873774	0.932331	24	18	10713.4	0.986702	1	28	17.9999	78706	0.99003	1	26	18.1071	68498.7	1883.77	0.0275008	63298	63841	64775	35640	114015	65068	44281	41281	78682	78503	72853	60520	97095	79872	77229	60628	68598.8
unknown1034	0.873774	0.932331	24	18	847.821	0.938856	1	26.6465	12	2999.5	0.982799	1	25.3233	15.1983	2524.91	550.847	0.218165	1449	1843	3543	835	4499	825	1510	1974	2471	2428	3918	3181	2456	2881	3261	3342	2526
unknown1072	0.873774	0.932331	18	9	182.787	1	1	28	6	1092	0.991675	1	23	8.21429	884.5	75.536	0.0853997	884	595	258	580	1731	1136	716	785	1067	1019	178	704	934	981	475	2054	881.062
unknown1361	0.873774	0.932331	18	9	308.652	0.998428	1	28	6.00001	1986.75	0.991489	1	23	8.21429	1723.73	179.411	0.104083	1034	1579	1259	1242	2824	2397	1427	1299	2037	1657	1652	1314	2361	2048	1746	1573	1715.56
unknown1401	0.873774	0.932331	24	18	1265.72	0.931384	1	28	17.9999	6556.49	0.98148	1	26	18.1071	4372.34	781.174	0.178663	2799	6772	1418	1317	6110	4317	1776	1881	2833	7297	2785	3762	4680	8443	2593	10510	4330.81
unknown1509	0.873774	0.932331	24	15	3887.67	0.999709	1	21.6708	12	21233.8	0.991641	1	22.8354	13.4585	17405.1	4779.53	0.274606	19020	9863	22671	5824	38431	12748	7484	8848	28401	14442	22695	19397	19493	15412	15643	16709	17317.6
unknown562	0.873774	0.932331	24	15	4765.19	0.980459	1	23.9024	12	28101.2	0.989204	1	23.9512	13.497	23718.9	4710.76	0.198608	21846	27394	19339	8890	22543	36062	16529	12052	36261	33102	26058	16984	29063	33129	23992	16193	23714.8
unknown923	0.873774	0.932331	18	9	791.076	0.890575	1	24.0327	12	4406.5	0.973341	1	21.0163	10.501	3611.2	1219.51	0.337701	2283	2860	2700	2379	2140	8486	3401	3132	6761	5443	3380	2042	2640	2956	3502	1248	3459.56
CL 72:10|CL 36:4_36:6	1	1	18	9	511.238	0.99973	1	28	18	6810.5	1	1	23	13.1428	6505.59	83.4013	0.0128199	5284	7144	6036	5613	7758	7895	5994	4410	6793	6519	7163	6212	7521	6655	6182	6884	6503.94
LPC 12:0/0:0	1	1	24	18	3524.93	0.995846	1	28	17.9999	18329.2	0.999991	1	26	18.1071	13914	22.8778	0.00164423	10962	17356	6904	3803	16082	22583	7157	5139	10573	29856	8325	10587	14600	26823	6995	24899	13915.2
LPC 14:0	1	1	24	18	4269.86	0.944443	1	28	17.9999	25659.7	0.998427	1	26	18.1071	18022.4	1706.45	0.0946851	12865	21244	7126	8875	20872	22339	10455	8002	15170	34917	8619	13784	17972	36660	11044	36963	17931.7
LPC 14:1/0:0	1	1	24	18	915.703	0.99958	1	28	6	5111	1	1	26	25.5357	5120.49	363.757	0.0710396	3997	5791	3626	1916	6101	7903	3539	2901	3258	9462	3263	4039	5715	9053	2743	8276	5098.94
LPC 18:1	1	1	24	18	23064.2	0.946738	1	28	17.9999	150743	0.998556	1	26	18.1071	93521.9	4714.82	0.0504141	51689	86136	29983	29556	164354	77758	42036	42566	69659	183331	37640	74657	74270	188675	53533	286497	93271.2
LPC 20:5	1	1	18	3	58.6899	0.988214	1	20	6	233	0.99993	1	19	4.43333	209.27	53.1845	0.254142	325	222	198	173	119	229	292	292	96	310	53	115	169	298	107	339	208.562
LPC 22:6	1	1	24	18	32.5269	0.829952	1	28	17.9999	252.499	0.984645	1	26	18.1071	143.528	39.3186	0.273944	107	45	14	127	57	71	93	158	59	352	55	115	61	415	115	419	141.438
LPC P-16:0 or LPC O-16:1	1	1	18	6	160.16	1	1	20	6	1533.25	1	1	19	6.01667	1398.29	156.084	0.111625	1562	1450	876	1188	1984	2069	1046	1034	2080	1500	861	928	1049	1535	1022	1886	1379.38
LPE 14:0	1	1	24	18	331.987	0.995373	1	28	6.00001	1586.25	0.999989	1	26	25.5357	1519.6	287.501	0.189196	954	1564	481	1178	2811	1815	910	809	1375	2154	793	911	2038	2383	1457	2408	1502.56
LPE 16:0	1	1	24	18	210.718	0.999999	1	28	6.00001	1576.5	1	1	26	25.5357	1373.9	114.327	0.0832135	994	1493	604	789	2918	1604	790	994	1470	1810	709	896	1212	1908	1246	2437	1367.12
LPE 17:1	1	1	18	9	116.673	0.999031	1	28	6	774.25	1	1	23	8.21429	692.354	79.1805	0.114364	572	776	283	399	1242	724	525	606	798	913	573	542	592	857	544	1074	688.75
LPE 22:6	1	1	24	18	29.3449	0.999999	1	28	17.9999	139.5	1	1	26	18.1071	116.872	10.5218	0.0900287	126	187	52	38	282	55	54	17	151	147	91	103	82	125	114	237	116.312
LPG 16:1	1	1	24	18	101.47	0.999987	1	21.253	12	432.25	1	1	22.6265	14.8727	369.854	119.516	0.323144	422	644	263	33	815	231	23	38	173	786	252	518	325	470	233	699	370.312
LPI 18:2	1	1	18	12	2398.15	1	1	20	6	16853	1	1	19	9.18333	14973.4	1740.43	0.116235	14428	27951	6082	3598	41931	17360	3364	4757	20936	22813	6949	9514	11604	10255	11431	20495	14591.8
LPI 18:3	1	1	18	12	218.496	1	1	20	6	1374	1	1	19	9.18333	1243.83	90.1441	0.0724729	1134	2332	595	430	3658	1127	337	374	1389	1815	711	954	1074	665	966	2024	1224.06
LPS 16:1	1	1	24	12	113.667	0.996432	1	23.7736	6	546.75	0.999994	1	23.8868	8.98598	445.103	115.041	0.25846	418	668	168	218	834	799	205	349	876	519	308	319	294	325	253	559	444.5
LPS 18:1	1	1	18	9	613.238	0.998596	1	24.1644	12	3165.75	0.999999	1	21.0822	10.5052	2675.18	697.294	0.260653	2417	3539	960	971	6588	2963	1085	1480	4971	3991	1759	1942	2037	1793	1668	3281	2590.31
LPS 18:2	1	1	18	12	150.26	0.999695	1	20	12	873.25	1	1	19	12.0333	722.13	169.875	0.235242	736	1046	388	261	1403	795	310	386	1379	974	553	587	587	449	498	881	702.062
NAGly 14:0;O	1	1	24	18	2049.02	0.995042	1	28	17.9999	15273.5	0.999988	1	26	18.1071	13224.1	1021.61	0.0772534	13089	9921	17074	6891	17559	7370	8792	13336	11992	11894	15016	16689	21578	8548	15999	14969	13169.8
PC 38:5 Isomer B	1	1	18	12	181.726	0.999998	1	20	12	7340.5	1	1	19	12.0333	7163.01	127.555	0.0178075	6351	7257	7609	7205	7821	8225	6027	5513	7421	6504	7343	8094	7229	6794	7663	7311	7147.94
TG 40:2|TG 12:0_14:1_14:1	1	1	18	9	14742.5	0.98475	1	24.0327	12	61868.2	0.999883	1	21.0163	10.501	51137.8	16563	0.323889	28971	46630	38894	24793	21481	123337	51658	46424	117020	63761	49849	16843	34385	55481	52444	13281	49078.2
unknown1000	1	1	18	9	279.661	0.999975	1	28	17.9999	3253	1	1	23	13.1428	3121.93	53.2948	0.0170711	2042	2672	2797	3858	2702	3873	2910	3249	3694	3299	3152	2674	3538	2739	3979	2756	3120.88
unknown1075	1	1	24	18	354.26	0.910718	1	21.0501	17.9999	6305.25	0.99589	1	22.5251	18.0775	5996.41	280.966	0.0468558	6041	6631	6140	5137	6265	5940	5269	4853	5841	5749	6143	6966	6882	5727	6150	6462	6012.25
unknown1090	1	1	18	9	275.241	0.966725	1	28	5.99998	1439.75	0.99944	1	23	8.21428	1289.01	30.4836	0.0236488	677	1205	770	698	1636	2034	930	1159	1423	1033	751	1342	1512	1391	1779	2262	1287.62
unknown1184	1	1	24	18	546.063	0.973488	1	28	17.9999	3123.25	0.999645	1	26	18.1071	2282.15	188.592	0.0826381	1663	2751	1333	614	2727	2899	930	1061	1721	5129	1168	1865	2210	4698	1344	4241	2272.12
unknown1203	1	1	24	18	18703.5	0.964521	1	28	18	190424	0.999363	1	26	18.1071	173298	2724.69	0.0157226	152330	195079	161512	122448	218615	188403	133194	122494	178724	188600	191376	155974	188732	204346	187242	181376	173153
unknown1207	1	1	18	9	1263.95	0.988684	1	20	5.99999	5627.25	0.999936	1	19	7.59999	4679.57	1118.89	0.239101	3391	3456	2359	5232	3092	8930	5724	4763	7960	5471	2656	3124	5629	5308	2034	2225	4459.62
unknown1223	1	1	18	12	917.471	0.999587	1	20.1831	12	5063.75	1	1	19.0915	12.0394	4281.88	671.459	0.156814	4226	5124	3251	2447	2696	7390	2605	1944	7509	6256	3948	2542	5573	5795	3213	2735	4203.38
unknown1247	1	1	24	18	115.612	0.999978	1	28	6.00003	355.25	1	1	26	25.5357	341.137	21.3005	0.0624398	326	293	111	66	969	323	72	57	232	846	0	265	367	463	272	776	339.875
unknown1248	1	1	24	18	80.6102	0.97039	1	28	17.9999	973.247	0.999557	1	26	18.1071	447.493	197.401	0.441126	71	349	100	0	758	139	0	0	0	1440	64	178	114	1107	0	2672	437
unknown1260	1	1	18	12	366.635	0.999963	1	25.5652	12	3124	1	1	21.7826	12.3731	2968.52	211.253	0.0711643	2525	3267	2290	2574	4869	2535	2425	2621	2955	2797	3544	3200	2601	2315	3008	3774	2956.25
unknown1292	1	1	24	18	1227.54	0.918622	1	28	17.9999	7873.75	0.996595	1	26	18.1071	6745.67	336.547	0.0498908	4635	4558	8686	3984	9352	7643	5207	4448	7498	7431	7421	5859	7892	7678	7294	8631	6763.56
unknown1303	1	1	24	18	4.24264	0.999791	1	28	17.9999	31	1	1	26	18.1071	27.6946	0.133728	0.00482867	13	27	40	15	22	33	26	22	18	22	43	38	42	41	25	16	27.6875
unknown1321	1	1	24	18	7371.94	0.953633	1	28	17.9999	71418.7	0.998908	1	26	18.1071	63980	1404.49	0.021952	55858	72756	58323	43707	81306	71097	47593	43136	65629	69177	71536	56693	73219	76015	68876	67565	63905.4
unknown1385	1	1	24	18	2993.01	0.982935	1	28	17.9999	10117.7	0.999854	1	26	18.1071	8498.41	68.85	0.00810151	5408	6326	12412	1821	16321	2750	4791	5995	7546	7843	12402	11830	8060	10084	11477	10850	8494.75
unknown1396	1	1	24	18	493.561	0.916885	1	25.5652	17.9999	4437	0.996446	1	24.7826	18.0179	3973.18	235.659	0.0593125	3642	4737	3767	2373	5011	4012	2773	2467	3855	4725	4642	3730	4461	4704	4146	4437	3967.62
unknown1398	1	1	18	12	453.609	0.944107	1	20	12	2562.75	0.998408	1	19	12.0333	1848.56	722.182	0.390672	1187	1730	1492	792	888	2993	1574	1110	4624	3157	1754	716	1384	2319	1921	571	1763.25
unknown1440	1	1	24	18	546.947	0.977445	1	28	17.9999	2985.99	0.999744	1	26	18.1071	2055.86	460.698	0.22409	1313	3779	668	501	2227	2486	853	776	1250	3810	1237	1658	2100	4348	1077	4419	2031.38
unknown1444	1	1	24	18	856.837	0.912863	1	23.3952	12	4000.25	0.996088	1	23.6976	14.9642	3131.39	1149.21	0.366995	3306	2479	2287	1219	3629	3315	1164	1408	7578	3691	2799	1933	4220	5900	3082	2095	3131.56
unknown1486	1	1	18	6	1246.63	1	1	20	6.00001	8981	1	1	19	6.01667	7855.89	1382.9	0.176033	7546	8950	3410	5029	14704	9278	5571	6371	3887	9636	3820	5759	7429	11091	5195	15337	7688.31
unknown1506	1	1	18	6	2577.4	0.996205	1	20	6	10055	0.999993	1	19	6.01667	8151.31	1954.18	0.239738	3840	4615	6470	13598	12374	3954	11249	12643	6105	4882	7812	9049	6216	6027	7819	9979	7914.5
unknown1517	1	1	24	18	204	0.985089	1	28	17.9999	1021.5	0.999888	1	26	18.1071	659.085	134.469	0.204023	576	973	186	92	1338	446	102	212	428	1158	325	509	691	1209	347	1839	651.938
unknown1537	1	1	24	18	151.144	1	1	28	6	2483.5	1	1	26	25.5357	2397.47	56.4892	0.0235621	2300	2574	1577	2389	4260	2061	1636	1977	2550	2901	2078	2165	2113	2462	2138	3232	2400.81
unknown1564	1	1	24	18	130.461	0.999596	1	28	17.9999	297.249	1	1	26	18.1071	163.794	34.4436	0.210286	60	0	0	53	653	0	0	0	401	294	0	0	0	367	0	822	165.625
unknown1592	1	1	18	0	164.049	0.999998	1	20	6	4187	1	1	19	2.85	4059.19	150.262	0.0370177	3903	4311	3893	4460	3571	5638	3763	3776	3762	3666	4053	4129	3981	4104	3948	4225	4073.94
unknown1598	1	1	24	18	5947.12	0.992254	1	28	6	68347.2	0.99997	1	26	25.5357	67686.2	7582.93	0.112031	67052	53306	68158	43603	90730	57848	56430	68381	46269	64444	61685	76867	96502	62581	85113	76823	67237
unknown1606	1	1	24	0	85.3831	0.999999	1	28	6	531.75	1	1	26	2.78572	477.304	382.946	0.80231	499	625	81	132	1282	418	188	239	213	721	139	246	464	757	312	1359	479.688
unknown1609	1	1	24	18	189.151	0.962722	1	28	17.9999	851.499	0.999296	1	26	18.1071	498.015	116.689	0.234308	265	389	110	80	925	86	88	73	517	1540	51	339	223	1106	50	2027	491.812
unknown1646	1	1	24	0	315.723	0.999998	1	20	6	1435.5	1	1	22	3.3	922.102	1061.48	1.15115	916	1186	155	219	4702	543	254	243	624	463	260	297	985	719	939	2339	927.75
unknown1709	1	1	24	0	284.434	1	1	20	5.99999	1240	1	1	22	3.3	971.053	612.626	0.630889	1244	992	165	268	3858	575	214	313	659	1568	269	401	939	1243	804	2077	974.312
unknown1712	1	1	18	6	39.598	0.999569	1	28	6.00002	104.75	1	1	23	6.29763	85.8089	3.52509	0.0410807	0	0	73	0	255	164	0	0	17	120	0	0	0	234	92	416	85.6875
unknown45	1	1	18	9	745.291	0.994559	1	28	5.99999	13053	0.999985	1	23	8.21428	12674.6	224.419	0.0177062	11893	10762	12630	11528	14702	13996	11951	11563	11785	12978	13042	12286	13841	12416	14199	13058	12664.4
unknown533	1	1	24	18	3481.09	0.910494	1	28	17.9999	17143.7	0.995869	1	26	18.1071	11751.8	788.439	0.067091	6470	14012	5461	3980	17648	10924	5135	6545	9808	22161	6163	10476	10652	23440	7852	26631	11709.9
unknown589	1	1	18	9	991.54	0.827927	1	28	17.9999	7054.75	0.984265	1	23	13.1428	6231.84	4.64439	0.000745267	5140	4016	6184	4375	8534	7404	5267	4651	7111	7090	5773	5944	7528	8029	6152	6510	6231.75
unknown635	1	1	18	0	132.229	0.991962	1	28	17.9999	6569.47	0.999968	1	23	18.8928	2102.05	2013.44	0.957845	1119	1004	718	637	538	1193	343	364	297	995	982	523	643	554	416	24665	2186.94
unknown647	1	1	24	18	5417.15	0.999803	1	28	6.00001	24027.2	1	1	26	25.5357	22698.1	1720.98	0.0758204	23333	19259	11752	11244	46658	24008	12437	13006	22800	34346	11058	17421	23671	30144	23038	37363	22596.1
unknown795	1	1	18	9	417.016	0.941202	1	28	6	3436.25	0.998236	1	23	8.21428	3329.27	102.124	0.0306747	2341	2057	3219	3293	3085	3610	3867	3183	4227	2812	3236	3034	4911	3585	3379	3355	3324.62
unknown816	1	1	18	9	1330.42	0.999995	1	25.7143	6.00002	9357.25	1	1	21.8571	8.0143	8710.59	841.031	0.0965528	5641	9377	9371	5778	13274	11151	7767	5237	13717	8966	7677	5962	7201	11389	8266	7306	8630
unknown875	1	1	18	9	339.765	0.999766	1	28	6	2318	1	1	23	8.21428	2230.85	135.393	0.0606911	1944	1919	1722	1756	3190	2944	1437	1701	1619	3144	2053	2432	2162	2746	1443	3383	2224.69
unknown876	1	1	24	18	137.532	0.999282	1	28	17.9999	1155.5	1	1	26	18.1071	866.317	34.1844	0.0394594	580	1152	411	475	1431	1061	405	321	837	1346	535	656	500	1875	515	1732	864.5
unknown889	1	1	24	18	233.345	0.999966	1	28	6	2495.5	1	1	26	25.5357	2395.15	259.863	0.108496	2260	2148	2169	1248	3913	3068	1731	1270	2477	2850	1535	1869	2250	2904	2500	3884	2379.75
unknown93	1	1	24	18	4410.93	0.898736	1	28	17.9999	22370.2	0.99469	1	26	18.1071	13266.2	2506.53	0.188941	7041	14761	3202	1910	18723	12593	3178	3670	9428	31523	5382	9236	10841	31662	5205	41773	13133
unknown977	1	1	24	18	2816.41	0.9986	1	28	6	18420.2	0.999999	1	26	25.5357	17087.6	3190.77	0.18673	14387	13448	8503	9497	29284	21223	11471	11703	10836	25742	8653	12599	19264	28042	12467	33258	16898.6
unknown996	1	1	24	12	3255.87	0.99619	1	27.3065	6	41864.5	0.999993	1	25.6533	9.23168	38685.1	4019.44	0.103902	30884	39444	42218	47944	41675	61570	22492	41721	37655	41191	43188	43691	20853	30811	43657	34782	38986
unknown998	1	1	18	12	3602.71	0.994937	1	21.1511	12	17570.8	0.999987	1	19.5755	12.0782	13759.8	3435.85	0.249701	11846	17107	10030	3033	10009	24959	7284	4881	27848	21408	14002	7025	14956	20742	13453	5568	13384.4

## Sheet: unique cycling in sugarAS
CycID	JTK_pvalue	JTK_BH.Q	JTK_period	JTK_adjphase	JTK_amplitude	LS_pvalue	LS_BH.Q	LS_period	LS_adjphase	LS_amplitude	meta2d_pvalue	meta2d_BH.Q	meta2d_period	meta2d_phase	meta2d_Base	meta2d_AMP	meta2d_rAMP	0	0.1	0.2	0.3	6	6.1	6.2	6.3	12	12.1	12.2	12.3	18	18.1	18.2	18.3	SugarS
unknown718	4.22e-05	0.0480947	18	0	743.876	0.122779	0.900865	24.0327	17.9999	3523.5	6.82e-05	0.0541552	21.0163	18.3785	3215.19	673.42	0.20945	4234	4146	3627	4012	3101	1982	2556	2785	2606	3053	3373	3277	3448	3368	3493	3785	3302.88
PE 36:3;O|PE 18:2_18:1;O	8.77e-05	0.0480947	24	6	399.339	0.258775	0.900865	20	6	1984.25	0.000265348	0.0541552	22	6.05	1134.95	735.781	0.648292	986	710	840	1538	1256	3735	1641	1305	754	739	799	682	690	610	556	588	1089.31
unknown1027	0.000171384	0.0480947	18	9	1336.08	0.0596831	0.900865	20	6	5821	0.00012776	0.0541552	19	7.6	4033.62	1674.86	0.415226	2283	1865	2487	3693	6392	4366	5263	7263	3380	3346	4062	3767	2479	2944	2608	3072	3704.38
unknown1446	0.000171384	0.0480947	18	9	1018.23	0.0562493	0.900865	20	5.99999	4123.75	0.000120981	0.0541552	19	7.6	3109.03	1112.92	0.357965	1955	1618	1882	2713	3972	4401	3291	4831	3719	3320	2721	2685	2280	2299	2215	2342	2890.25
unknown590	0.000171384	0.0480947	18	9	624.375	0.127959	0.900865	20	6	2913	0.000257189	0.0541552	19	7.6	2326.13	635.89	0.273368	1439	1234	1590	2187	2627	3185	2886	2954	2207	2093	2587	2284	1671	2043	1800	2431	2201.12
unknown644	0.000171384	0.0480947	18	9	4997.83	0.0765072	0.900865	20	6	21281.2	0.000160518	0.0541552	19	7.6	15237.7	5598.13	0.367386	7964	7072	10337	14237	23417	17891	19036	24781	11711	12120	16113	14842	12076	11440	11558	11601	14137.2
unknown705	0.000171384	0.0480947	18	9	4800.19	0.0789661	0.900865	20	5.99999	23933	0.000165249	0.0541552	19	7.59999	19023.7	5161.32	0.27131	12655	14606	11927	16628	26035	26485	23679	19533	22313	15733	18952	17681	15370	17175	14308	15066	18009.1
unknown812	0.000171384	0.0480947	18	9	1518.34	0.0299748	0.900865	20	6	5288.5	6.77e-05	0.0541552	19	7.6	3505.28	1724.98	0.492108	1791	1488	2242	2469	5365	4587	4892	6310	3463	2531	3701	3071	1830	2233	2753	1933	3166.19
unknown697	0.000245754	0.061302	18	9	571.166	0.192935	0.900865	20	5.99999	2317	0.000519503	0.0777522	19	7.59999	1785.51	564.699	0.316268	907	1022	1212	1471	2922	1919	2121	2306	1835	1298	2232	1591	1581	1591	1265	1519	1674.5
DG 36:4 Isomer A	0.000320124	0.0653345	24	9	746.882	0.0549326	0.900865	20.464	6.00001	3298	0.000210117	0.0541552	22.232	7.42769	2252.08	874.476	0.388297	1448	1682	1827	2394	2565	3591	4107	2929	2669	1766	2422	1762	1483	1749	1232	1366	2187
unknown1687	0.000320124	0.0653345	24	6	1784.03	0.0814502	0.900865	25.8651	6	6138	0.000301276	0.0563637	24.9326	6.00841	4127.06	1569.36	0.380261	5742	4534	4711	5513	5863	9314	4727	4648	2993	4589	4097	2989	3483	650	1705	1257	4175.94
HexCer 38:2;3O|HexCer 16:2;2O/22:0;O	0.000572095	0.0764256	18	9	6272.74	0.483746	0.938252	20	6	29498	0.00254398	0.137175	19	7.6	22522.1	6688.07	0.296956	12143	11747	16125	16377	25500	41245	27118	24129	23680	20652	20964	17245	24725	23696	17104	16868	21207.4
unknown60	0.000572095	0.0764256	18	9	2926.01	0.0577853	0.900865	20	6	11072	0.000374132	0.0612779	19	7.6	7358.03	3517.21	0.47801	4021	3154	3733	6454	7844	12466	10924	13054	8877	5332	6562	5634	4374	4734	3883	5620	6666.62
unknown817	0.000572095	0.0764256	24	6	2871.03	0.0394242	0.900865	21.8859	6	9165.25	0.000263877	0.0541552	22.9429	6.01276	6235.51	1953.38	0.313267	7540	7144	5740	8539	9358	10761	7884	8658	3349	5992	3448	4695	5929	1914	4890	2875	6169.75
unknown1727	0.000779665	0.0764256	24	6	508.41	0.0276767	0.900865	20	6	1434.25	0.000253415	0.0541552	22	6.05	740.784	585.954	0.790991	508	507	484	1217	1783	1345	1136	1473	304	437	356	507	231	193	263	527	704.438
unknown837	0.000779665	0.0764256	18	9	1248.22	0.319693	0.900865	20	6	5795.75	0.00231732	0.137175	19	7.6	4224.31	1453.94	0.344183	2477	1865	3045	2727	7670	6487	4400	4626	3621	4202	4465	2723	4202	3949	3452	3105	3938.5
CAR 24:0	0.000987235	0.0764256	18	9	1483.86	0.353964	0.900865	20	6.00001	6834.75	0.00313074	0.137175	19	7.60001	5326.8	1522.85	0.285884	2975	3054	4150	3702	7195	9014	5943	5187	5438	5796	4526	4417	5537	4997	4062	4446	5027.44
FA 24:0	0.000987235	0.0764256	18	9	99564.5	0.306375	0.900865	20	6	600267	0.0027535	0.137175	19	7.6	484220	104184	0.215158	302429	358151	376903	404208	704131	656924	527989	512024	432106	382359	508069	454314	416616	418864	451243	513510	463740
FA 28:0	0.000987235	0.0764256	18	9	8219.41	0.221864	0.900865	20	6.00002	54625	0.00206466	0.137175	19	7.60001	45633.8	9575.01	0.209823	33456	37046	33363	39471	56806	69540	49760	42394	50005	38841	48330	43157	39102	41281	37553	39920	43751.6
PC P-38:5 or PC O-38:6	0.000987235	0.0764256	18	6	215.314	0.133509	0.900865	20	6	502.5	0.00130938	0.127806	19	6.01667	320.472	163.265	0.509452	227	202	191	557	497	583	577	353	149	72	166	158	361	180	294	244	300.688
TG 54:5 Isomer A	0.000987235	0.0764256	24	9	5570.94	0.0955616	0.900865	20	5.99998	28123.5	0.000968756	0.110486	22	7.42499	13919.7	11026.4	0.79214	5423	5510	6791	13053	9392	37275	35889	29938	18085	8469	11346	5699	5224	6517	4465	4833	12994.3
TG 62:1	0.000987235	0.0764256	18	9	2129.1	0.06314	0.900865	20	6.00001	9142.5	0.000665915	0.0859643	19	7.60001	6259.23	2383.18	0.380746	3414	3094	4119	5267	7464	9941	8993	10172	4763	4823	5497	5255	4721	4574	6024	4531	5790.75
unknown1333	0.000987235	0.0764256	24	6	2150.13	0.0521751	0.900865	26.4865	6.59e-05	4475.75	0.000560097	0.0785886	25.2432	3.15544	2723.41	1945.67	0.714424	6458	2727	3214	5504	3545	6347	4243	3107	720	1593	2073	1338	1348	396	644	522	2736.19
unknown1595	0.000987235	0.0764256	18	9	1103.79	0.332472	0.900865	20	6.00001	3883.5	0.00296121	0.137175	19	7.60001	2820.52	1100.82	0.39029	1533	1269	1898	1337	5620	2788	3501	3625	2599	1982	3564	2527	2207	1827	2724	2665	2604.12
unknown1665	0.000987235	0.0764256	24	9	1225.06	0.228325	0.900865	20.2759	6.00001	5282.25	0.00211831	0.137175	22.1379	7.42638	3520.29	1661.88	0.472085	3049	2479	2304	2104	3420	8776	4552	4381	4737	3983	2906	2810	2046	2519	2066	2111	3390.19
unknown188	0.000987235	0.0764256	18	9	6051.07	0.0342725	0.900865	20	6	13742.5	0.000382134	0.0612779	19	7.6	7222.03	6071.87	0.840742	2091	1209	1492	3932	11569	13440	14185	15776	5852	3079	11247	2909	2065	2449	1972	3188	6028.44
unknown594	0.000987235	0.0764256	18	6	3329.77	0.202454	0.900865	20	6	10342.8	0.00190233	0.137175	19	6.01667	6372.57	3964.68	0.622148	3790	3280	3371	7668	9829	12884	12531	6127	3728	2210	3735	3269	8239	3756	5885	3972	5892.12
unknown643	0.000987235	0.0764256	24	18	2877.57	0.0655855	0.900865	25.4179	17.9999	10353	0.000689246	0.0859643	24.7089	18.0148	7377.11	1954.65	0.264962	6798	6385	6585	3362	6311	4192	4892	3439	9766	7714	8973	7532	12127	12857	8917	7511	7335.06
unknown846	0.000987235	0.0764256	18	9	459.973	0.337021	0.900865	20	6	2005.5	0.00299721	0.137175	19	7.6	1333.02	568.256	0.426292	471	636	830	1027	1309	1859	1675	3179	1175	775	1201	1119	1084	991	1022	1188	1221.31
CAR 18:1	0.00164724	0.0781007	18	6	6143.87	0.199083	0.900865	20	6.00001	13122.5	0.00295889	0.137175	19	6.01667	7307.34	5773.1	0.790042	2716	2390	2561	11447	7678	19153	11240	14419	2217	5203	2282	2521	4643	5731	6169	5354	6607.75
PC 34:6|PC 16:1_18:5	0.00164724	0.0781007	18	9	2083.14	0.290013	0.900865	20	6	8185.5	0.00413061	0.137791	19	7.6	5558.81	2284.69	0.411004	2611	2534	3666	3532	6714	11858	7674	6496	6191	4769	3386	4049	5590	5767	3807	3111	5109.69
TG 60:2	0.00164724	0.0781007	18	9	5135.36	0.0764331	0.900865	20	6	20571	0.00125652	0.127806	19	7.6	14192.7	5498.34	0.387407	5915	7914	9292	11735	16906	21558	20687	23133	14039	9141	13346	11041	12044	11749	10447	10842	13111.8
TG 60:6	0.00164724	0.0781007	18	9	268.347	0.408815	0.908997	20	6	760.25	0.00559148	0.142053	19	7.6	555.41	217.011	0.390722	245	234	196	437	680	916	670	775	422	303	754	637	565	281	528	561	512.75
unknown1347	0.00164724	0.0781007	18	9	3106.5	0.305248	0.900865	20	6	12126	0.00432186	0.137791	19	7.6	8255.5	3564.44	0.431766	2985	3444	4777	6471	16829	7842	9328	14505	7035	5086	9376	7064	4870	6282	6492	8491	7554.81
unknown1732	0.00164724	0.0781007	18	9	2586.95	0.298533	0.900865	20	6.00001	10827.5	0.00423773	0.137791	19	7.6	8151.16	2634.6	0.323218	4260	2803	5687	6516	9972	12466	12207	8665	6770	7823	9043	6457	8237	7211	7511	6504	7633.25
unknown222	0.00164724	0.0781007	18	9	11625.9	0.664891	1	20	6.00001	54398	0.00856122	0.147418	19	7.6	42591.6	11645.1	0.273414	19625	23277	32864	30820	53651	72446	51573	39922	48008	39470	35399	35481	49321	47824	33563	31595	40302.4
unknown360	0.00164724	0.0781007	24	9	1629.53	0.102472	0.900865	20	5.99998	6994.5	0.00163509	0.135955	22	7.42499	3421.44	2767.4	0.808841	1153	1254	1857	3338	2076	9795	8610	7497	3656	3542	1924	1509	954	1569	1464	829	3189.19
unknown408	0.00164724	0.0781007	24	9	881.409	0.110468	0.900865	20	5.99999	6060.75	0.00174902	0.137175	22	7.42499	3216.05	2125.24	0.660823	1415	2032	1733	2776	2902	9656	6678	5007	2770	2665	2591	1882	1470	2018	1429	1579	3037.69
unknown476	0.00164724	0.0781007	18	9	6706.55	0.461653	0.932813	20	6	28812.2	0.00622173	0.142053	19	7.6	19805	8079.71	0.407964	7130	5472	13245	15280	21857	42204	27648	23540	21865	15568	16003	13391	21696	21717	15282	9569	18216.7
unknown486	0.00164724	0.0781007	18	9	2005	0.140608	0.900865	20	6	6697	0.00217033	0.137175	19	7.6	4688.1	1819.78	0.388169	2144	2030	3145	3051	7117	6102	6097	7472	4459	2885	5171	3621	3733	3987	3657	4615	4330.38
unknown536	0.00164724	0.0781007	18	9	1297.54	0.477331	0.938088	20	5.99999	7224.5	0.00640676	0.142053	19	7.6	6104.83	1156.45	0.189432	3712	4031	5075	5152	6228	7438	8248	6984	6230	6476	5562	5284	6592	6171	5387	5470	5877.5
unknown541	0.00164724	0.0781007	18	9	2619.83	0.472509	0.934611	20	5.99999	10531	0.00634995	0.142053	19	7.59999	8008.63	2639.58	0.329592	4071	3205	7235	4404	10415	14929	8135	8645	8301	5422	9319	7586	6851	7302	6025	7991	7489.75
unknown844	0.00164724	0.0781007	18	9	2247.36	0.595035	0.996162	20	6	11109	0.00777055	0.14396	19	7.6	7725.48	2899.84	0.37536	3378	3837	5363	5662	8926	18993	9069	7448	6978	6488	7351	4858	8254	6270	6159	5453	7155.44
unknown895	0.00164724	0.0781007	18	9	2679.93	0.0590609	0.900865	20	6	10475	0.000996015	0.110486	19	7.6	6765.25	3469.38	0.512823	2777	3261	4808	4924	8173	13980	10835	8912	7902	6633	5181	4187	3916	5365	3578	2900	6083.25
unknown896	0.00164724	0.0781007	24	9	1094.95	0.0615299	0.900865	20.7529	6.00002	5612.5	0.0010335	0.110486	22.3765	7.43029	3991.99	1330.78	0.333364	3813	2604	4089	3181	5543	6822	5214	4871	4098	3093	4218	3896	4178	2142	2229	2423	3900.88
unknown91	0.00164724	0.0781007	18	9	102451	0.668533	1	20	5.99999	435802	0.0086021	0.147418	19	7.6	348329	90407.8	0.259547	164463	180869	286706	250244	432578	559575	421631	329425	394349	329259	312039	288752	400516	390461	286779	261269	330557
DG 38:3	0.00267199	0.0781007	18	9	528.209	0.0865185	0.900865	20	6.00002	2234.75	0.00216667	0.137175	19	7.60001	1463.87	647.937	0.442619	698	738	904	1096	1792	2013	2866	2268	1051	997	1405	1226	1150	802	860	1518	1336.5
TG 54:6 Isomer A	0.00267199	0.0781007	24	9	2982.22	0.121724	0.900865	20	6.00002	14411.8	0.00293727	0.137175	22	7.42501	7736.64	5276.36	0.681997	2941	3662	4093	7933	5173	19095	18213	15166	10559	4716	6103	4427	3870	3987	3336	3427	7293.81
unknown1220	0.00267199	0.0781007	18	6	1828.4	0.213402	0.900865	20	6	5051.5	0.00482939	0.139307	19	6.01667	3381.11	1674.59	0.495276	1983	2177	1540	4554	4707	6470	4468	4561	1480	2411	1667	2227	3514	2934	3264	2894	3178.19
unknown1258	0.00267199	0.0781007	18	9	1895.75	0.268083	0.900865	25.5652	5.99999	8779.75	0.00590344	0.142053	21.7826	8.00177	7454.63	1576.08	0.211423	4108	5312	6806	5069	7474	9919	9537	8189	9222	6939	7943	7902	8388	5357	7369	7244	7298.62
unknown1264	0.00267199	0.0781007	24	15	3944.95	0.0947617	0.900865	24.1644	12	13057	0.00235006	0.137175	24.0822	13.5053	9696.15	3397.62	0.350409	5103	6780	9293	3974	10718	6347	6235	7970	16079	8257	13887	14005	12122	11917	9734	12797	9701.12
unknown1338	0.00267199	0.0781007	24	9	910.93	0.0887021	0.900865	20	5.99999	5162	0.00221544	0.137175	22	7.42499	2527.3	1965.82	0.777837	886	1162	1358	1826	2452	7470	6657	4069	2357	2350	1604	996	1074	1575	1115	846	2362.31
unknown1535	0.00267199	0.0781007	18	9	3524.57	0.14285	0.900865	20	6.00001	10320.2	0.00338597	0.137175	19	7.60001	5786.65	3593.8	0.621051	1455	1770	2544	2019	10348	7266	9851	13816	2248	2870	5322	4042	3338	3364	5038	5992	5080.19
unknown1539	0.00267199	0.0781007	18	9	1022.12	0.126164	0.900865	20	6	3690.25	0.00303234	0.137175	19	7.6	2368.79	1141.62	0.481944	735	1079	1010	1954	3451	3072	3325	4913	2052	1307	2501	1691	1578	1952	1717	1973	2144.38
unknown1619	0.00267199	0.0781007	18	6	1907.07	0.289043	0.900865	20	6	8152.75	0.00630686	0.142053	19	6.01667	4286.02	3919.96	0.914593	1388	2748	2530	2769	3369	14549	9022	5671	388	2709	2179	1528	2431	3352	2649	3694	3811
unknown1694	0.00267199	0.0781007	24	6	6039.05	0.0886003	0.900865	26.4865	6.00001	19833	0.00221317	0.137175	25.2432	6.01459	13376.5	4999.09	0.373722	19325	14219	16296	18150	18592	30502	15118	15120	8936	16065	13193	9946	10890	2025	5366	3622	13585.3
unknown1707	0.00267199	0.0781007	18	9	4279.41	0.247755	0.900865	20	5.99999	12656.5	0.00550801	0.142053	19	7.6	9257.42	3586.92	0.387465	5226	3111	3880	7448	13088	13060	13435	11043	10774	11343	6892	6401	6953	10990	7476	5717	8552.31
unknown196	0.00267199	0.0781007	18	9	2291.91	0.532732	0.964892	20	5.99998	16541.2	0.0107537	0.150181	19	7.59999	14284.1	2314.73	0.162049	9808	10170	12925	11846	15812	19777	16198	14378	14953	14606	13496	12354	15426	14172	13376	11969	13829.1
unknown209	0.00267199	0.0781007	18	9	1383.28	0.27719	0.900865	20	5.99999	6118	0.00607925	0.142053	19	7.59999	4942.96	1366.95	0.276544	2532	2114	3394	5048	6318	5912	5340	6902	5250	4865	5959	3865	3896	4322	4716	4355	4674.25
unknown235	0.00267199	0.0781007	24	9	866.206	0.109578	0.900865	23.7736	6	5528.75	0.00267497	0.137175	23.8868	7.49306	4534.64	1037.45	0.228783	3774	3344	4989	4393	4872	5788	6143	5312	4914	4599	5188	4809	4605	2322	3754	3668	4529.62
unknown238	0.00267199	0.0781007	18	9	1979.55	0.225649	0.900865	20	6	7645.5	0.0050729	0.140601	19	7.6	5628.18	1844.03	0.327642	2712	2376	4175	4695	8441	8836	7685	5620	5408	5303	4602	4657	5434	5247	5034	4026	5265.69
unknown265	0.00267199	0.0781007	18	9	2057.33	0.222653	0.900865	20	6	9108.25	0.00501349	0.140601	19	7.6	6389.1	2371.73	0.371214	3170	3291	4126	5321	6527	12507	8780	8619	6204	6005	3972	5576	6882	5327	4534	3925	5922.88
unknown272	0.00267199	0.0781007	18	9	16355.2	0.27814	0.900865	20	6	98820.2	0.00609754	0.142053	19	7.6	74608.4	21544.9	0.288773	45749	40055	58676	67372	77093	136354	97370	84464	76219	69326	65199	56657	72486	67581	61149	50220	70373.1
unknown275	0.00267199	0.0781007	18	9	3539.07	0.170943	0.900865	20	6	15702.2	0.00396985	0.137791	19	7.6	12337.7	3539.25	0.286864	6680	6667	7780	14015	15541	15743	15164	16361	11229	9021	15280	12796	9898	9600	10043	10454	11642
unknown308	0.00267199	0.0781007	18	9	4326.43	0.052016	0.900865	20	6	15561.2	0.00137334	0.128465	19	7.6	10410	4555.79	0.437635	4042	4253	7575	8090	15317	15415	14576	16937	8232	6813	10898	9064	7314	7626	7329	8750	9514.44
unknown319	0.00267199	0.0781007	24	9	1645.44	0.100799	0.900865	20	5.99999	8186.25	0.00248314	0.137175	22	7.42499	4106.63	3147.14	0.766357	1688	1391	2445	4197	2566	11643	10021	8515	4506	3051	3032	2301	1916	1869	1143	1196	3842.5
unknown34	0.00267199	0.0781007	24	9	4873.73	0.105852	0.900865	20	5.99999	23153.2	0.00259379	0.137175	22	7.42499	12161.8	8289.04	0.681564	4885	6909	6287	12397	9966	34069	26379	22199	15310	9354	8229	4957	6079	6738	4857	4843	11466.1
unknown459	0.00267199	0.0781007	18	9	1070.56	0.656924	1	20	6	6849.5	0.0128929	0.158043	19	7.6	5451.85	1197.26	0.219606	3089	3636	4406	4418	5926	8891	7137	5444	5248	4551	4499	5120	5285	6684	4461	4669	5216.5
unknown475	0.00267199	0.0781007	18	9	2399.21	0.448815	0.926663	20	6	10930.8	0.00926534	0.14806	19	7.6	7921.37	2748.89	0.347022	4092	4248	5396	5476	8905	16368	10054	8396	8583	7998	5828	5533	8799	7368	6270	4782	7381
unknown586	0.00267199	0.0781007	18	9	1814.44	0.32546	0.900865	20	6	7878.5	0.00699827	0.142053	19	7.6	5887.12	1758.2	0.298651	3430	3147	4045	4739	5969	9560	8191	7794	6638	5117	4816	4095	6515	5937	4621	4050	5541.5
unknown598	0.00267199	0.0781007	18	9	1119	0.386102	0.906601	20	6	5410	0.00812597	0.14396	19	7.6	3977.12	1334.36	0.335509	2141	2011	2689	2832	4168	7615	5658	4199	3787	4291	3574	2585	3855	4035	3021	2976	3714.81
unknown754	0.00267199	0.0781007	18	9	1464.06	0.484381	0.938252	20	6	8376	0.00990087	0.148504	19	7.6	6714.95	1534.15	0.228467	3804	4075	5583	5567	7595	10582	7598	7729	6941	6515	6185	5061	7549	6405	6066	5359	6413.38
unknown765	0.00267199	0.0781007	18	9	732.916	0.14069	0.900865	20	6	3146	0.00334051	0.137175	19	7.6	2275.64	780.921	0.343166	989	975	1504	2393	2826	3237	3075	3446	2015	1516	2221	2251	1993	1603	1902	2008	2122.12
unknown791	0.00344533	0.0781007	24	9	909.693	0.148555	0.900865	20	6.00001	4906	0.00439017	0.137791	22	7.42501	3013.44	1519.95	0.50439	1637	2043	2160	2602	2653	7552	4992	4427	3619	2962	2454	1702	1794	1959	1575	2043	2885.88
PC 35:2 Isomer B	0.00421867	0.0781007	18	9	19760.8	0.56755	0.976919	20	5.99999	98187.2	0.0168431	0.167616	19	7.59999	80640.4	17990.9	0.223101	48801	43555	71079	61739	96728	120606	93061	82354	92885	75720	72528	67732	89978	83737	70302	62855	77103.8
PC 36:5 Isomer A	0.00421867	0.0781007	18	9	72143.6	0.224638	0.900865	20	6	272269	0.0075449	0.143059	19	7.6	192860	69475.4	0.360237	86399	77201	137001	152784	300736	311450	280995	195894	198070	168312	142828	144760	192778	184475	163367	130198	179203
TG 50:4	0.00421867	0.0781007	24	9	25549.9	0.100778	0.900865	20	6	115222	0.00372561	0.137791	22	7.425	56655.8	43012.9	0.759197	18424	25502	28625	63743	42652	163722	140276	114239	66275	41469	36167	18497	20414	34945	16256	17529	53045.9
TG 53:3	0.00421867	0.0781007	24	9	593.263	0.120432	0.900865	20	5.99998	3883.5	0.00436168	0.137791	22	7.42499	2603.38	997.184	0.383035	2325	1694	2190	2020	2436	5472	3984	3642	3093	1903	2523	1837	1678	1996	1662	1860	2519.69
TG 59:2	0.00421867	0.0781007	18	9	1086.47	0.363556	0.900865	20	6	4238.25	0.0114723	0.155747	19	7.6	3228.3	845.325	0.261848	1993	2086	2114	2254	4037	4502	3938	4476	3576	2590	2582	2314	2868	3616	3381	2667	3062.12
TG 60:1	0.00421867	0.0781007	18	9	3896.51	0.105513	0.900865	20	6.00002	16156.8	0.00388021	0.137791	19	7.60001	11019.6	4313.77	0.391463	4548	5706	6934	10743	11350	17474	16600	19203	9712	7223	10276	8994	7783	8818	8196	9186	10171.6
unknown1023	0.00421867	0.0781007	18	9	1142.68	0.039681	0.900865	20	6	4432.5	0.00162297	0.135955	19	7.6	2824.08	1394.92	0.493936	1168	1172	1845	2387	3564	4927	4489	4750	1629	2081	2786	2714	1856	1637	1588	2205	2549.88
unknown103	0.00421867	0.0781007	18	9	57337.2	0.407451	0.908997	20	6	298213	0.0126615	0.158043	19	7.6	222452	67558.2	0.303699	112476	101052	167407	195420	243415	407217	289312	252909	228533	196857	190269	168665	234251	225883	185432	147640	209171
unknown110	0.00421867	0.0781007	18	9	9305.53	0.200041	0.900865	20	6	35715	0.00681664	0.142053	19	7.6	25736.9	8923.15	0.346706	11676	10545	20304	19789	39011	40673	36157	27019	26514	23337	19690	19833	25280	24531	20420	18946	23982.8
unknown1132	0.00421867	0.0781007	18	6	706.046	0.417564	0.911102	20	5.99999	4033.75	0.0129326	0.158043	19	6.01666	3090.38	1038.27	0.33597	1900	2566	2152	2768	3914	5414	3646	3161	2693	2658	2541	2279	2728	3418	2750	2845	2964.56
unknown116	0.00421867	0.0781007	18	6	3373.61	0.52957	0.964654	20	6.00001	14097	0.0158707	0.163609	19	6.01667	9358.44	4851.24	0.518382	6700	5199	5884	8771	18502	17005	13682	7199	5559	3033	6414	4958	14588	5445	10439	6951	8770.56
unknown1224	0.00421867	0.0781007	24	6	6086.78	0.182123	0.900865	23.52	6	36910.8	0.00627816	0.142053	23.76	6.00061	30108.3	5100.61	0.169409	34590	33599	26653	34755	39815	45206	34168	28454	23139	26347	33007	26971	31395	19515	22175	21307	30068.5
unknown1397	0.00421867	0.0781007	24	6	4217.54	0.102671	0.900865	24.8451	6	16487.5	0.00378752	0.137791	24.4225	6.0018	12429.7	3099.49	0.249362	17408	12806	12847	13458	18522	19394	15597	12437	8084	10948	14697	10967	12507	5746	7391	6758	12472.9
unknown1408	0.00421867	0.0781007	18	9	1895.58	0.484133	0.938252	20	6.00001	7036	0.0146923	0.16191	19	7.6	5192.31	2007.14	0.38656	2421	2788	3153	2262	10698	5428	4924	7094	4937	3794	7143	4282	3820	4621	4338	5061	4797.75
unknown1568	0.00421867	0.0781007	18	9	3579.73	0.375169	0.906507	20	6	15411	0.011789	0.156267	19	7.6	10672.7	4241.77	0.39744	4443	4911	7979	6004	8850	21810	13222	17762	8790	7994	9441	10038	11130	9608	7171	8269	9838.88
unknown1570	0.00421867	0.0781007	24	15	559.145	0.152192	0.900865	22.9091	12	3015.5	0.00536165	0.142053	23.4545	13.4724	2247.74	906.777	0.403416	1383	1564	2169	1087	2018	1990	1803	2375	3412	2023	4013	2614	2601	2141	2587	2050	2239.38
unknown212	0.00421867	0.0781007	24	9	1726.05	0.116165	0.900865	20.1831	6	9839	0.00422481	0.137791	22.0915	7.42583	6909.27	2227.04	0.322327	3842	5863	6042	8189	7341	13224	9999	8792	7223	7077	6085	4723	4342	5592	4389	4968	6730.69
unknown230	0.00421867	0.0781007	18	9	1994.04	0.352163	0.900865	20	6	10741.8	0.0111601	0.153708	19	7.6	8644.03	2057.25	0.237996	4707	4942	7369	7626	10129	12633	11048	9157	9237	7822	8005	7605	9455	8601	7412	6086	8239.62
unknown252	0.00421867	0.0781007	18	9	6851.16	0.478581	0.938088	20	6.00002	26447.8	0.0145471	0.16191	19	7.60001	21092.6	5910.67	0.280225	9515	10535	18568	15180	26419	33625	25237	20510	25116	21881	19520	16387	22817	21051	18911	13619	19930.7
unknown279	0.00421867	0.0781007	18	9	7909.17	0.46802	0.934611	20	5.99999	31569.2	0.0142701	0.1618	19	7.59999	24164.6	7650.24	0.316589	10351	11085	17620	18088	33224	40809	28864	23380	27529	24476	21901	17723	26841	24318	21624	14739	22660.8
unknown298	0.00421867	0.0781007	18	9	4246.88	0.217583	0.900865	20	6	16552	0.00733724	0.142053	19	7.6	10826.9	4801.97	0.443523	4098	3273	7063	9166	12964	23478	16475	13291	10369	9517	7088	7144	10916	9370	7872	6043	9882.94
unknown323	0.00421867	0.0781007	18	9	22601.3	0.289407	0.900865	20	6	102343	0.00941099	0.14806	19	7.6	68605.1	28221	0.411354	27928	23223	44800	61352	70058	147396	103690	88227	67530	54705	50513	46773	67489	67457	47743	40036	63057.5
unknown371	0.00421867	0.0781007	18	9	2833.38	0.0832371	0.900865	20	6	12601	0.0031443	0.137175	19	7.6	8986.03	3266.96	0.36356	3993	4325	6528	8710	12145	13955	11306	12998	7005	6513	10518	7740	6820	6992	6347	7606	8343.81
unknown375	0.00421867	0.0781007	18	9	11583.1	0.746763	1	20	6	53486.8	0.0212971	0.168352	19	7.6	39627	13060.4	0.329585	17840	17833	29929	24224	43546	85376	46353	38672	42745	33957	34171	30687	42356	44857	33324	27083	37059.6
unknown454	0.00421867	0.0781007	24	9	1369.84	0.0579103	0.900865	20	5.99999	6778	0.00227621	0.137175	22	7.42499	3302.42	2621.86	0.793923	1266	1153	1605	3065	3122	8936	8172	6882	3461	2376	2387	1523	1531	1724	1237	878	3082.38
unknown528	0.00421867	0.0781007	18	9	7997.02	0.744806	1	20	6	43518.8	0.0212495	0.168352	19	7.6	35603.6	7835.43	0.220074	21488	19739	27539	27296	41485	55733	38661	38196	36055	37697	32097	27920	41928	37863	33633	27683	34063.3
unknown560	0.00421867	0.0781007	18	9	2270.7	0.568745	0.976919	20	6.00002	10237.8	0.0168736	0.167616	19	7.60001	8066.06	2228.1	0.276232	4457	4395	5491	6449	9604	14196	9148	8003	8533	9130	6470	6574	9246	8094	6398	5861	7628.06
unknown58	0.00421867	0.0781007	24	9	3792.57	0.0915552	0.900865	20	5.99998	19021.8	0.00342173	0.137175	22	7.42499	9472.8	7373.9	0.778429	3671	3993	5024	8376	6776	24728	24082	20501	12556	5619	7826	3500	3659	4817	3293	3242	8853.94
unknown592	0.00421867	0.0781007	24	18	2840.8	0.0749055	0.900865	28	17.9999	14074.2	0.0028629	0.137175	26	18.1071	10610	1399.79	0.131931	9064	8314	9474	5027	10583	8455	8140	6570	12828	11724	11781	10313	15858	16874	12402	11163	10535.6
unknown595	0.00421867	0.0781007	18	9	1024.24	0.149989	0.900865	20	6	8240	0.00529326	0.142053	19	7.6	6464.1	1561.9	0.241627	4682	5099	4725	6371	8731	10703	7279	6247	6534	6209	5853	5159	5251	5479	5444	4747	6157.06
unknown661	0.00421867	0.0781007	18	9	6491.77	0.669689	1	20	5.99999	21987.5	0.0194068	0.168352	19	7.59999	16321.1	5780.1	0.35415	5745	6122	11549	9220	22727	29868	20892	14463	19428	15281	13481	12202	19548	19196	12575	10660	15184.8
unknown68	0.00421867	0.0781007	24	9	5174.61	0.0913136	0.900865	20	6.00003	24910.5	0.00341372	0.137175	22	7.42501	12072.2	9862.68	0.816972	4177	4942	6157	11202	8121	34256	31206	26059	14660	8359	9071	4697	4600	5944	3333	3128	11244.5
unknown803	0.00421867	0.0781007	18	9	1538.31	0.146389	0.900865	20	6	5901.5	0.00518123	0.141852	19	7.6	4226.53	1487.48	0.351939	2038	2129	2961	3449	6679	5478	5817	5632	3171	2618	4234	4641	3135	2688	3778	4498	3934.12
unknown839	0.00421867	0.0781007	18	9	547.831	0.259248	0.900865	20	6	2938	0.00855064	0.147418	19	7.6	2413.4	533.323	0.220984	1882	1522	1992	1820	2695	2765	2923	3369	2392	2057	2758	2110	2114	2060	1686	2792	2308.56
unknown869	0.00421867	0.0781007	18	9	1176.27	0.135502	0.900865	20	6	5797.5	0.00484008	0.139307	19	7.6	4220.06	1419.58	0.336388	2179	2109	2945	4060	5157	7295	5657	5081	4561	3695	3781	2943	3693	3759	3365	2776	3941
unknown88	0.00421867	0.0781007	18	9	24617.4	0.368253	0.904531	20	6	110788	0.0116006	0.155747	19	7.6	83779.8	25344.7	0.302515	40226	36943	65461	68789	102785	139696	108813	91857	90590	76260	70435	66310	92221	85204	68501	56671	78797.6
unknown9	0.00421867	0.0781007	18	9	66395.9	0.548919	0.969382	20	5.99999	461979	0.0163675	0.165518	19	7.59999	400940	62621.1	0.156186	278767	274160	359334	350532	471319	527841	447778	400978	422063	391838	381107	360888	438332	414292	365750	333110	388631
unknown938	0.00421867	0.0781007	18	9	1423.58	0.130106	0.900865	20	6	5622.25	0.00466964	0.139145	19	7.6	3916.58	1507.11	0.384802	1503	1794	3230	3170	3952	6344	5790	6403	3413	2806	3852	3364	2740	2977	2653	3934	3620.31
unknown953	0.00421867	0.0781007	24	12	655.842	0.0970589	0.900865	25.1282	12	4377.25	0.00360352	0.137791	24.5641	12.0063	3806.74	771.278	0.202609	2807	2741	3936	2732	4316	4370	3940	4048	4973	3914	4527	4095	3947	3443	3961	3388	3821.12
unknown959	0.00421867	0.0781007	18	9	1783.32	0.3922	0.908997	20	6.00001	7574.5	0.0122508	0.156267	19	7.6	5629.08	1851.78	0.328967	2805	2427	3973	4713	5703	10467	7416	6712	5583	6278	4752	3882	5804	5291	4869	3566	5265.06
unknown969	0.00421867	0.0781007	24	6	1422.52	0.115315	0.900865	28	5.82e-05	4888.5	0.00419747	0.137791	26	3.25003	3789.42	1019.34	0.268996	6399	3589	5007	4559	5046	6245	4590	3174	3141	3520	3484	2785	3479	1643	2462	1773	3806
Cer 32:2;3O|Cer 14:2;2O/18:0;(2OH)	0.00536208	0.0781007	18	6	377.949	0.658697	1	20	6	2363.75	0.0234732	0.174716	19	6.01667	1808.45	602.03	0.332897	1059	1517	1308	1699	2098	3507	2043	1807	1500	1424	1406	1444	1557	2109	1517	1773	1735.5
DG 34:1	0.0065055	0.0781007	18	9	2075	0.142295	0.900865	20	6.00002	12071.5	0.00739167	0.142053	19	7.60001	8794	2617.94	0.297695	5458	6724	6000	7076	9597	14964	13565	10160	7992	7191	7131	6996	7546	9112	7431	5527	8279.38
PC 34:4	0.0065055	0.0781007	18	9	67391.9	0.203594	0.900865	20	6	284818	0.0101015	0.149196	19	7.6	191116	78647.9	0.41152	80180	72473	128839	161045	225520	397940	283237	232573	181906	166405	132438	133823	190566	166417	141647	115472	175655
PC 35:3	0.0065055	0.0781007	18	9	14661.5	0.482759	0.938252	20	6	56544	0.0212409	0.168352	19	7.6	44307.5	13134.8	0.296447	20119	19709	37535	31304	58290	71435	53252	43199	53086	43470	38784	36262	48771	46647	37541	28204	41725.5
PC 36:2	0.0065055	0.0781007	18	9	562626	0.397454	0.908997	20	6	2.72513e+06	0.0179903	0.168352	19	7.6	2.01712e+06	633942	0.314281	984362	848739	1486080	1782992	2241191	3673292	2661582	2324470	2056661	1801231	1709346	1525216	2152272	2075541	1649157	1307852	1892499
PC 36:3 Isomer A	0.0065055	0.0781007	18	9	627365	0.591712	0.993616	20	5.99999	4.23702e+06	0.0252513	0.174973	19	7.6	3.68329e+06	577847	0.156884	2519211	2481590	3333367	3191612	4262390	4885612	4178801	3621260	3921860	3571146	3536517	3311702	4050395	3759291	3384169	3106210	3.5697e+06
PE 34:3|PE 16:1_18:2	0.0065055	0.0781007	18	9	121989	0.298683	0.900865	20	6	647705	0.0140747	0.161535	19	7.6	476438	148533	0.311757	261703	237211	353797	427404	485279	876093	661204	568245	489143	408254	395471	363740	480831	471719	366698	309037	447239
TG 52:4	0.0065055	0.0781007	24	9	23321.1	0.082691	0.900865	20	5.99999	110652	0.00458747	0.139145	22	7.42499	54391.2	42515.2	0.781655	18618	26226	27104	52636	44646	150657	135740	111567	70274	37420	37339	17840	20364	30863	16461	15415	50823.1
TG 54:4	0.0065055	0.0781007	24	9	7931.62	0.109459	0.900865	20	5.99999	34766.5	0.00587281	0.142053	22	7.425	17845.9	12622.7	0.707317	7186	9405	8696	18732	14665	52692	40083	31626	21212	13687	12020	7021	9019	8977	6592	6971	16786.5
TG 62:2	0.0065055	0.0781007	18	9	2244.53	0.112435	0.900865	20	6	9431.5	0.00601283	0.142053	19	7.6	6626.64	2411.64	0.363932	3142	3412	4582	6051	6573	10410	10312	10431	6686	5235	5722	4843	4716	5886	4893	5547	6152.56
unknown1005	0.0065055	0.0781007	18	9	876.812	0.180201	0.900865	20	6	3928.25	0.00908389	0.14806	19	7.6	2894.03	953.677	0.329532	1599	1226	2071	2863	4284	3881	2895	4653	2984	2831	2763	1877	2346	2740	2056	2236	2706.56
unknown1088	0.0065055	0.0781007	18	9	1480.68	0.529674	0.964654	20	6	8915.5	0.0229855	0.174544	19	7.6	7408.25	1409.45	0.190254	4891	5530	6095	6130	10745	8866	7818	8233	6425	5768	8013	7615	5748	6365	7040	8817	7131.19
unknown113	0.0065055	0.0781007	18	9	2554.25	0.512731	0.957474	20	6	14199.5	0.0223587	0.171798	19	7.6	10949	2875.61	0.262638	6060	5684	8396	9359	12246	18963	13760	11829	11136	9825	9515	8449	12054	11525	9292	8046	10383.7
unknown1199	0.0065055	0.0781007	18	9	452.548	0.0747717	0.900865	20	6.00002	2056.75	0.0041971	0.137791	19	7.60001	1414.8	556.327	0.39322	610	585	1043	1619	1724	2165	2071	2267	1155	930	1421	1336	893	926	918	1224	1305.44
unknown1294	0.0065055	0.0781007	24	6	744.583	0.199445	0.900865	22.6735	6	4422	0.0099223	0.148504	23.3368	6.00485	3483.42	748.742	0.214944	3938	3514	3195	4048	4421	5812	4049	3406	2620	2937	3666	3288	3769	1890	2541	2385	3467.44
unknown130	0.0065055	0.0781007	18	9	15552.5	0.443545	0.92371	20	6	80082.2	0.01976	0.168352	19	7.6	63128.7	16238.8	0.257233	35707	33277	50580	51305	72937	101678	78381	67333	67805	59483	56593	50240	68943	66265	53457	45000	59936.5
unknown1307	0.0065055	0.0781007	24	6	1777.14	0.141263	0.900865	26.3284	6	5445.25	0.00734475	0.142053	25.1642	6.01287	4050.86	810.253	0.20002	6738	4835	4263	4773	5946	7515	4717	3603	2256	3355	4630	3131	3923	1536	2233	1866	4082.5
unknown1314	0.0065055	0.0781007	18	6	1335.02	0.433595	0.918464	20	6.00001	4766	0.0193807	0.168352	19	6.01667	3376.4	1325.7	0.392638	2616	2827	1972	4205	6929	4966	4543	2626	2306	1329	2541	1872	4313	2198	3313	2896	3215.75
unknown1350	0.0065055	0.0781007	18	9	1107.15	0.158284	0.900865	20	6.00001	5333	0.00811258	0.14396	19	7.60001	3691.06	1367.44	0.370472	2083	1184	2363	4376	3728	6361	5949	5294	2945	3478	2459	3376	3042	2721	2992	2405	3422.25
unknown1381	0.0065055	0.0781007	18	9	2961.72	0.219195	0.900865	24.2975	12	10850.2	0.0107702	0.150181	21.1488	10.5096	8881.46	2864.1	0.32248	4334	4108	8597	6264	9240	9382	11102	12010	16010	10507	8468	8416	8200	8882	6415	4714	8540.56
unknown14	0.0065055	0.0781007	18	9	95331.6	0.441024	0.92188	20	6	583361	0.019664	0.168352	19	7.6	475814	100444	0.211099	303065	275745	405539	425548	540643	708266	578668	505867	504728	451117	429953	388444	518217	475780	424219	361312	456069
unknown142	0.0065055	0.0781007	18	9	1783.32	0.511298	0.957474	20	6.00002	8285.5	0.0223055	0.171798	19	7.60001	6465.18	1883.77	0.291371	3192	3891	4849	4644	6554	11769	7898	6921	7173	7004	5786	4777	6673	6784	5400	4203	6094.88
unknown1466	0.0065055	0.0781007	24	6	1392.12	0.137353	0.900865	25.1282	6	5195	0.00716653	0.142053	24.5641	6.00317	3952.21	744.025	0.188255	6153	4528	3660	4843	5923	6886	4253	3718	2404	3442	3815	3460	3709	1741	2552	2371	3966.12
unknown1490	0.0065055	0.0781007	18	9	1626.35	0.774436	1	28	6.00001	6250.5	0.0316932	0.180547	23	8.21429	5089.47	891.955	0.175255	2383	3150	3624	4580	6259	6037	6055	6651	6021	3720	5491	4750	4780	5338	6221	5722	5048.88
unknown1494	0.0065055	0.0781007	18	9	1017.35	0.833384	1	20	5.99999	4637	0.0337079	0.181473	19	7.6	3712.14	952.63	0.256626	2286	1709	2710	2466	4047	6590	3608	4303	4128	3066	3514	3329	4845	3632	3268	2897	3524.88
unknown1501	0.0065055	0.0781007	18	9	460.68	0.113436	0.900865	20	6.00002	2176.25	0.00605985	0.142053	19	7.60001	1351.88	666.744	0.493198	611	590	605	1256	1458	2104	2029	3114	884	852	1022	1264	868	891	985	1000	1220.81
unknown1511	0.0065055	0.0781007	18	9	1125.54	0.198639	0.900865	20	6.00002	3544	0.00988744	0.148504	19	7.60001	2021.62	1180.5	0.583937	547	692	949	785	3484	2347	3442	4903	729	1047	1698	1531	1249	1015	1856	2359	1789.56
unknown152	0.0065055	0.0781007	18	6	1684.68	0.878431	1	20	5.99997	10288.5	0.0352291	0.183249	19	6.01665	8009.81	2301.32	0.287312	7291	6347	8630	4727	8708	7377	16175	8894	2790	6850	5474	6932	7513	7344	10688	7955	7730.94
unknown1523	0.0065055	0.0781007	18	6	1190.41	0.510136	0.957474	20	6	9193.5	0.0222624	0.171798	19	6.01667	6685.02	2604.25	0.389564	4455	5138	5459	5875	9114	14478	6626	6556	3491	5087	5833	5909	5820	5786	6100	6184	6369.44
unknown1524	0.0065055	0.0781007	18	9	2907.98	0.125427	0.900865	20	6	10241	0.00661843	0.142053	19	7.6	6540.71	3200.82	0.489369	1916	2885	2715	5889	9276	8787	9262	13639	5615	3551	7243	4481	4049	5450	4498	5328	5911.5
unknown1542	0.0065055	0.0781007	18	9	414.895	0.0740553	0.900865	20	6.00002	1578.75	0.00416152	0.137791	19	7.60001	936.427	521.366	0.556761	259	369	421	851	1240	1475	1534	2066	607	452	844	772	473	516	594	870	833.938
unknown1567	0.0065055	0.0781007	18	9	459.089	0.576213	0.982073	20	6	1723.25	0.0246894	0.174973	19	7.6	1247.03	481.818	0.386374	573	748	809	584	2790	1299	1234	1570	1166	807	1757	923	966	982	981	1248	1152.31
unknown1607	0.0065055	0.0781007	18	9	433.103	0.110687	0.900865	20	6	1940.75	0.00593066	0.142053	19	7.6	1460.95	463.304	0.317125	797	900	1034	1361	1609	2035	1938	2181	1169	1083	1511	1709	1299	815	1144	1333	1369.88
unknown164	0.0065055	0.0781007	18	9	8181.23	0.744641	1	20	6.00001	41667	0.030664	0.180106	19	7.6	32501.2	8438.93	0.25965	16543	16120	23247	26351	37553	58213	37986	32916	30853	32146	28057	25860	35171	37312	28587	26561	30842.2
unknown1725	0.0065055	0.0781007	18	9	4890.7	0.481626	0.938088	24.7059	6	16815	0.0211984	0.168352	21.3529	7.93109	12541.6	4609.11	0.367507	5149	9106	5780	6956	13856	26142	15964	11298	15409	12082	15185	11243	10008	15007	12582	6281	12003
unknown18	0.0065055	0.0781007	18	9	22014	0.333376	0.900865	20	6	133583	0.0154712	0.162391	19	7.6	105444	24624.1	0.233528	64113	59864	85188	101119	113810	163883	135672	120967	105941	95282	93104	86121	110745	105016	90366	78461	100603
unknown2	0.0065055	0.0781007	18	9	17613.1	0.481788	0.938088	20	6	111364	0.0212045	0.168352	19	7.6	92144.2	18492.4	0.20069	59788	54182	78668	82752	103340	134974	109892	97252	99251	86094	85090	77721	101598	90538	83960	71044	88509
unknown217	0.0065055	0.0781007	18	9	5762.92	0.470754	0.934611	20	6	27907	0.0207898	0.168352	19	7.6	20872.7	6312.66	0.302436	10164	9778	14968	17133	24814	38040	26148	22626	21422	19587	16408	16041	21048	23408	16021	16503	19631.8
unknown242	0.0065055	0.0781007	18	9	6857.17	0.334134	0.900865	20	6	30084.2	0.0155014	0.162391	19	7.6	22238.9	7020.78	0.315697	9853	9809	17112	19636	28003	37889	30989	23456	21842	21045	17611	17688	25120	21481	16121	16086	20858.8
unknown276	0.0065055	0.0781007	18	9	3086.52	0.363229	0.900865	20	6	16427	0.0166539	0.166911	19	7.6	12210.5	3672.56	0.300771	6653	6641	8465	11024	12388	22864	16737	13719	12418	11012	10233	9010	11651	12381	9398	9223	11488.6
unknown285	0.0065055	0.0781007	18	9	1643.85	0.310265	0.900865	20	6	7473.25	0.0145437	0.16191	19	7.6	5490.51	1708.34	0.311143	2703	3354	4052	4104	5363	9816	7565	7149	5654	5144	4109	3982	5937	4883	4240	4420	5154.69
unknown31	0.0065055	0.0781007	18	9	5464.52	0.706696	1	20	5.99999	65459.5	0.0293419	0.180106	19	7.59999	59766.4	5502.88	0.0920731	48166	47699	54875	56280	62165	73490	65407	60776	60924	56535	58431	56324	59838	62870	58744	56430	58684.6
unknown311	0.0065055	0.0781007	18	9	3957.32	0.471227	0.934611	20	6	19839.8	0.0208076	0.168352	19	7.6	15539.5	3884.41	0.24997	8919	8664	12080	13722	17728	25085	19267	17279	17597	14404	13031	11267	16600	16828	12718	11226	14775.9
unknown334	0.0065055	0.0781007	18	9	3434.59	0.611187	1	20	5.99999	17004.2	0.0259537	0.174973	19	7.59999	13825	3267.23	0.236329	8226	7506	11030	10734	16442	22161	15810	13604	15587	13868	12436	10944	14838	15006	12041	10690	13182.7
unknown341	0.0065055	0.0781007	18	9	1566.06	0.153401	0.900865	20	6.00002	6504.5	0.00789359	0.14396	19	7.60001	4016.15	2005.38	0.499328	1228	1550	2203	3650	3865	5963	7469	8721	2693	2373	3428	3261	2326	2290	2905	4026	3621.94
unknown365	0.0065055	0.0781007	18	9	2165.51	0.556757	0.973164	20	6.00001	14318.5	0.0239802	0.174973	19	7.6	11434.4	2729.79	0.238734	6721	5872	9604	10320	11932	19293	13345	12704	12340	11396	10137	8657	11568	11876	9973	8627	10897.8
unknown378	0.0065055	0.0781007	18	9	14616.1	0.230511	0.900865	20	6	67067.5	0.0112508	0.154012	19	7.6	45806.3	17789.5	0.388364	22012	17211	30969	40031	52443	93579	65814	56434	42703	37715	34750	33671	47951	42882	31637	27147	42309.3
unknown463	0.0065055	0.0781007	24	18	3270.37	0.0805106	0.900865	28	17.9999	15906.2	0.0044805	0.137791	26	18.1071	12180.1	1431.02	0.117488	10669	9522	10442	6396	11714	9723	9965	8024	15299	13123	13021	12142	18927	18276	14603	11819	12104.1
unknown469	0.0065055	0.0781007	18	9	13527.3	0.427354	0.916342	20	6	76632.8	0.019142	0.168352	19	7.6	60142.6	14775	0.245666	37542	32544	47036	54765	65592	99334	73078	68527	64795	57073	52376	43753	64617	60032	49855	44892	57238.2
unknown487	0.0065055	0.0781007	18	9	1237.79	0.543946	0.964892	20	6	7531.75	0.0235107	0.174716	19	7.6	5865.11	1405.24	0.239592	3876	3716	3878	5195	6207	10160	7765	5995	5586	5669	5002	4346	5490	6678	5266	4593	5588.88
unknown495	0.0065055	0.0781007	24	9	6376.69	0.12967	0.900865	20	6.00002	28164.2	0.00681422	0.142053	22	7.42501	16820.2	8922.07	0.530437	6743	10856	11017	17549	20490	42891	28890	20386	19955	15618	13780	8868	7490	13596	9713	9301	16071.4
unknown505	0.0065055	0.0781007	18	9	2911.16	0.114272	0.900865	20	5.99998	9745	0.00609902	0.142053	19	7.59999	5500.46	3573.46	0.649665	1897	2024	2558	5285	3381	13234	11083	11282	5895	2993	4782	2573	2416	2644	2334	2387	4798
unknown674	0.0065055	0.0781007	18	9	1471.14	0.0793018	0.900865	20	6.00002	7409	0.00442103	0.137791	19	7.60001	4993.94	1909.58	0.382379	2704	2598	3585	3813	5773	8967	7289	7607	4147	3692	3997	3690	4090	4114	3053	4778	4618.56
unknown699	0.0065055	0.0781007	18	9	538.108	0.13995	0.900865	20	6.00001	2753.75	0.00728498	0.142053	19	7.60001	1960	654.971	0.334168	1167	1017	1703	1496	2722	1974	3490	2829	1490	1407	1735	1920	1261	1481	1707	1901	1831.25
unknown73	0.0065055	0.0781007	18	6	2866.26	0.48707	0.940348	20	6.00002	11040	0.0214024	0.168591	19	6.01667	7613.89	3424.26	0.449739	5745	5268	4991	7665	14819	12131	11401	5809	4877	2530	5462	4408	11035	4229	8396	6417	7198.94
unknown743	0.0065055	0.0781007	18	9	2654.48	0.814445	1	20	6.00002	12346.8	0.0330637	0.181473	19	7.60001	9978.52	2367.77	0.237287	5436	5501	7702	7202	11808	16603	11687	9289	10892	10376	7994	8182	11588	11154	9025	7770	9513.06
unknown770	0.0065055	0.0781007	18	9	1079.75	0.134227	0.900865	20	6	4584	0.00702352	0.142053	19	7.6	3272.64	1222.53	0.373562	1477	1606	2498	2657	5601	4108	3747	4880	3140	2271	3980	2367	2311	2878	2085	2911	3032.31
unknown905	0.0065055	0.0781007	18	9	1033.61	0.0773883	0.900865	20	6.00001	3717.25	0.00432666	0.137791	19	7.60001	2257.58	1201.27	0.532104	813	651	1263	1823	2701	4096	3556	4516	1740	1321	2111	1476	1594	1225	1330	2127	2021.44
unknown907	0.0065055	0.0781007	18	9	1324.76	0.158052	0.900865	20	6.00002	5790.25	0.00810222	0.14396	19	7.60001	3485.47	1993.31	0.571893	1264	1105	2289	2814	2864	8657	6957	4683	2851	3199	3142	1788	2912	2002	1471	1500	3093.62
unknown913	0.0065055	0.0781007	18	9	723.724	0.381276	0.906601	20	6	3378.25	0.0173611	0.168352	19	7.6	2554.62	699.431	0.273791	1183	1703	1953	1777	3606	2752	3169	3986	2082	1740	2669	2296	2672	2409	2243	2434	2417.12
unknown963	0.0065055	0.0781007	24	6	8637.31	0.289976	0.900865	23.9024	6	23641.8	0.0137202	0.161266	23.9512	6.00003	14481.3	5507.77	0.380337	25888	11725	15118	27021	9967	46335	22238	16027	6859	12434	9899	6662	10327	1741	5679	3640	14472.5
unknown979	0.0065055	0.0781007	18	9	749.887	0.184067	0.900865	20	6.00001	3511.75	0.00925333	0.14806	19	7.60001	2244.02	1047.73	0.466897	888	747	1322	2307	2466	2730	3649	5202	1472	1540	1691	2274	1590	1357	1484	1890	2038.06
PI 38:4	0.00815751	0.0831033	18	6	91.2168	0.550877	0.969382	20	6.00001	345	0.028783	0.180106	19	6.01667	198.439	147.519	0.743397	51	140	98	226	272	699	180	229	83	104	96	110	184	170	143	104	180.562
unknown773	0.00815751	0.0831033	18	9	496.035	0.137051	0.900865	20	6	2237.5	0.00871611	0.14806	19	7.6	1499.74	668.559	0.445784	533	571	1106	1175	1608	2311	2022	3009	1223	1106	1723	1090	973	1018	1095	1330	1368.31
CAR 18:2	0.00980952	0.0831033	18	6	1135.44	0.533611	0.964892	20	6	3006	0.0327285	0.181473	19	6.01667	1940.56	1106.82	0.570361	918	711	826	2730	2160	4553	2788	2523	1053	1806	645	917	1241	2017	1897	2118	1806.44
CL 66:4|CL 16:1_16:1_16:1_18:1	0.00980952	0.0831033	18	9	852.064	0.423334	0.912077	20	6	4844	0.0269261	0.177639	19	7.6	3626.23	1044.64	0.288079	1936	2244	2390	3413	5103	6706	3946	3621	3423	2724	3795	2696	3908	3002	3233	2594	3420.88
Cer 44:0;4O|Cer 18:0;3O/26:0;(2OH)	0.00980952	0.0831033	18	9	5149.51	0.093971	0.900865	20	5.99999	24835.5	0.0073645	0.142053	19	7.59999	15078.5	7704.78	0.510977	4646	5746	7672	16972	21002	20858	24993	32489	8967	7814	14236	12156	6959	8874	8654	14985	13563.9
Cer 46:0;3O|Cer 20:0;3O/26:0	0.00980952	0.0831033	18	9	3109.15	0.186391	0.900865	20	6.00001	12374.5	0.0133552	0.158638	19	7.60001	8413.05	3189.83	0.379152	3865	4745	4715	7332	14251	9466	11822	13959	5942	4845	9127	6603	5688	5639	6523	10054	7786
DG 36:3	0.00980952	0.0831033	24	9	3061.07	0.164001	0.900865	20	6.00001	14366	0.0119569	0.156267	22	7.42501	9223.59	4177.4	0.452904	4948	5546	6622	10177	7130	18201	18934	13199	10266	6282	10241	6871	6284	6561	5112	5594	8873
PC 31:4|PC 16:1_15:3	0.00980952	0.0831033	18	9	25965.7	0.138998	0.900865	20	5.99998	108973	0.0103595	0.150181	19	7.59999	71159.8	30198.1	0.42437	30957	26749	41876	74802	77677	138597	119274	100343	68598	52546	49157	47540	64970	63151	46062	41277	65223.5
PC 33:1	0.00980952	0.0831033	18	9	17091.7	0.557028	0.973164	20	6	103561	0.03393	0.182092	19	7.6	84371	18218.9	0.215938	51697	46195	71402	74412	92797	128794	99267	93385	95588	77538	73451	68670	91957	87711	73297	66472	80789.6
PC 34:3 Isomer A	0.00980952	0.0831033	18	9	796720	0.466732	0.934611	20	6	5460032	0.0292396	0.180106	19	7.6	4.58155e+06	845917	0.184635	3049745	2783451	3983632	4227854	5120865	6383909	5403755	4931599	4848147	4478617	4224690	3841374	4937682	4627527	4163418	3637980	4.41527e+06
TG 46:4 Isomer A	0.00980952	0.0831033	24	9	8271.38	0.128885	0.900865	20	5.99998	36796	0.0097013	0.148159	22	7.42499	16698.8	15453.6	0.925434	4121	5355	5782	16443	8491	57647	42141	38905	19947	14743	9278	4780	4449	6312	4525	3510	15401.8
TG 56:4	0.00980952	0.0831033	24	9	1147.99	0.0933023	0.900865	20	5.99999	5752	0.00731864	0.142053	22	7.425	3045.04	1996.29	0.655587	1140	1702	1695	3173	2829	8667	5782	5730	3366	2137	2182	1539	1811	1354	1676	1257	2877.5
unknown1053	0.00980952	0.0831033	18	9	1111.93	0.0910782	0.900865	20	6.00002	5115.25	0.00716573	0.142053	19	7.60001	3460.23	1311.73	0.379089	1625	1559	2454	2844	4698	5379	5435	4949	2344	2134	3148	3105	2285	3058	2869	3352	3202.38
unknown1135	0.00980952	0.0831033	18	9	594.323	0.105434	0.900865	20	6	2529.25	0.00814383	0.14396	19	7.6	1663.28	737.791	0.443575	585	649	923	1814	2093	2448	2639	2937	1276	920	1756	1456	1020	992	1132	1652	1518.25
unknown1165	0.00980952	0.0831033	18	9	1209.15	0.278607	0.900865	20	6	5790.75	0.0188641	0.168352	19	7.6	4454.78	1287.18	0.288944	2903	2246	3391	3719	4622	7262	5426	5853	5432	3562	3833	3787	3989	4493	4176	2534	4201.75
unknown1225	0.00980952	0.0831033	18	9	796.556	0.078284	0.900865	20	6	4675.75	0.00627537	0.142053	19	7.6	3180.28	1119.3	0.351951	1452	1863	2087	3698	3781	5281	4912	4729	2421	1909	2720	2674	2563	2324	2329	2621	2960.25
unknown1263	0.00980952	0.0831033	18	9	2174.53	0.576145	0.982073	20	6.00001	10555	0.0349038	0.183249	19	7.6	8358.96	2032.68	0.243174	4504	4294	6773	6460	10363	12277	11050	8530	8706	7214	7452	7010	9511	9030	7674	6502	7959.38
unknown1304	0.00980952	0.0831033	18	9	1731	0.258266	0.900865	20	6	5559.25	0.0176789	0.168352	19	7.6	3597.32	1650.79	0.458894	1160	1532	1811	3396	8194	4465	4475	5103	2599	1786	4331	2618	2004	2447	2674	3770	3272.81
unknown1310	0.00980952	0.0831033	18	6	573.64	0.647146	1	20	5.99999	3576.75	0.0384674	0.186521	19	6.01666	2807.11	850.889	0.303119	1801	2387	1914	2624	3320	5013	3179	2795	2410	2532	2242	2124	2734	3203	2538	2448	2704
unknown1344	0.00980952	0.0831033	18	6	1843.78	0.514212	0.957474	20	5.99999	11602.2	0.0317254	0.180547	19	6.01666	8964.74	2882.49	0.321536	5519	7591	6585	8129	10412	16346	10452	9199	7851	7727	6989	7160	7906	10203	7729	8049	8615.44
unknown1358	0.00980952	0.0831033	18	9	12274.1	0.13426	0.900865	20	6	43635.8	0.0100521	0.149196	19	7.6	29349	12659.4	0.431341	11765	12595	19263	21119	49091	39475	38279	47698	21082	16618	32634	28036	16774	18781	22588	33969	26860.4
unknown1375	0.00980952	0.0831033	24	15	1410.32	0.263138	0.900865	23.7736	12	6750.5	0.0179642	0.168352	23.8868	13.4932	5321.67	1624.63	0.305286	3399	4060	5367	2874	6675	4372	4141	4325	7995	4303	7403	7301	6733	5432	4829	5886	5318.44
unknown1384	0.00980952	0.0831033	24	9	3389.16	0.0685113	0.900865	23.6461	6	14284.2	0.00558159	0.142053	23.8231	7.48927	11279.9	3603.03	0.31942	8604	10418	7565	8982	15385	16353	14192	11207	15846	9947	12804	13182	9099	10307	8424	7728	11252.7
unknown1407	0.00980952	0.0831033	18	6	7307.77	0.376967	0.906507	20	5.99999	19123.5	0.0244059	0.174973	19	6.01666	12267.6	6470.72	0.527463	8901	9453	5420	16834	27435	19630	19841	9588	5937	2415	7798	5124	18423	5194	13152	8591	11483.5
unknown1460	0.00980952	0.0831033	18	9	5217.74	0.437818	0.921182	20	6	28944.5	0.0277029	0.177639	19	7.6	22596.7	5244.12	0.232075	13393	16328	15458	17899	33957	31679	27693	22449	20186	20314	20184	17759	23703	24702	19047	20302	21565.8
unknown1470	0.00980952	0.0831033	18	9	2882.87	0.159228	0.900865	20	6.00001	10319.8	0.011655	0.155747	19	7.60001	6275.16	3268.6	0.520878	2194	1870	4085	3505	11224	6827	9985	13243	4213	3093	6109	4443	3583	3305	5528	6915	5632.62
unknown1483	0.00980952	0.0831033	18	9	898.379	0.151085	0.900865	20	6.00001	3379.5	0.0111368	0.153708	19	7.60001	2099.79	1030.65	0.490836	759	701	1520	1250	3571	2408	3154	4385	1385	1054	2072	1591	1356	1070	1853	2226	1897.19
unknown1503	0.00980952	0.0831033	18	9	1598.77	0.732697	1	20	6	10391.5	0.0426603	0.192104	19	7.6	8286.32	1741.71	0.210191	4972	6260	6137	6452	13366	11981	8617	7602	7731	7540	7416	6456	8975	9238	7230	7130	7943.94
unknown1536	0.00980952	0.0831033	18	6	1090.36	0.837349	1	20	6.00001	6396	0.0476569	0.198866	19	6.01667	5218.02	1178.64	0.225879	5142	4667	3587	4875	6752	9102	5716	4014	4103	3713	3124	3841	5371	5102	7032	5062	5075.19
unknown157	0.00980952	0.0831033	18	9	3101.02	0.435688	0.919132	20	6	20400.8	0.027589	0.177639	19	7.6	16602.4	3254.33	0.196016	11144	9771	13906	15351	18887	22848	21094	18774	13430	17162	15489	14008	18674	15951	16043	12870	15962.6
unknown1573	0.00980952	0.0831033	18	6	632.507	0.537887	0.964892	20	6	2472.75	0.0329486	0.181473	19	6.01667	1868.23	709.022	0.379515	1133	1519	993	1332	2966	2602	2172	2151	1722	1302	1936	1253	1573	2100	1811	1952	1782.31
unknown1604	0.00980952	0.0831033	24	15	4226.73	0.144566	0.900865	25.2722	12	14630	0.0107188	0.150181	24.6361	13.5478	11388.2	3181.07	0.27933	6392	8306	11318	5051	15287	7791	7415	8415	16514	10270	15721	16015	14139	13343	13064	13765	11425.4
unknown1605	0.00980952	0.0831033	18	9	596.975	0.31116	0.900865	20	6	2332.75	0.020731	0.168352	19	7.6	1699.18	587.533	0.345774	896	642	1290	1377	2623	1777	2299	2632	1250	909	1896	2022	1578	982	1409	1757	1583.69
unknown1628	0.00980952	0.0831033	24	15	1833.17	0.185115	0.900865	28	17.9999	5303.25	0.0132763	0.158596	26	16.4821	4085.46	237.536	0.0581417	2097	2141	2482	1843	6050	3309	2379	3141	5963	4467	6517	3846	7267	5702	4919	3325	4090.5
unknown1637	0.00980952	0.0831033	24	9	884.944	0.168049	0.900865	25.4179	6	4931.25	0.0122118	0.156267	24.7089	7.54925	4059.23	1078.76	0.265756	3457	3587	4994	3719	5388	5392	4305	4640	5045	4372	4695	4671	4279	1289	3248	2391	4092
unknown1681	0.00980952	0.0831033	24	15	704.455	0.143004	0.900865	27.1385	12	4102.5	0.0106182	0.150181	25.5692	13.6434	3407.59	809.342	0.237511	2122	2638	2813	2126	3745	2849	3030	4115	4941	3108	4623	3738	4290	3179	3857	3732	3431.62
unknown200	0.00980952	0.0831033	18	9	10345.9	0.579539	0.982653	20	6	57266.5	0.035076	0.183249	19	7.6	44093.1	11451.7	0.259716	22954	25398	31550	38458	45863	78061	55997	49145	44882	40314	35127	34896	48726	45998	38704	33398	41841.9
unknown239	0.00980952	0.0831033	18	9	1958.69	0.431667	0.916833	20	6	21330.8	0.0273736	0.177639	19	7.6	18557.2	2453.52	0.132214	14462	14563	16383	17784	18929	25838	21179	19377	18580	16784	18082	16882	19058	18259	16005	17034	18074.9
unknown27	0.00980952	0.0831033	18	9	29070	0.395021	0.908997	20	6	131426	0.0253935	0.174973	19	7.6	95204.5	33000.8	0.346631	42878	36542	69722	82216	109977	178841	132779	104107	108950	88104	73940	64325	105742	91877	72979	56497	88717.2
unknown274	0.00980952	0.0831033	18	9	3085.99	0.690315	1	26.6465	5.99999	15374	0.0405962	0.187143	22.3233	8.09408	12740.4	2479.19	0.194593	7701	7785	10801	9545	15664	20295	12985	12552	15281	12330	13057	11472	14468	14858	10680	11371	12552.8
unknown293	0.00980952	0.0831033	18	6	897.672	0.595511	0.996217	20	6	7958.5	0.0358839	0.183249	19	6.01667	6808.19	1084.15	0.159242	6192	5781	7533	6119	7718	8167	10015	5934	3635	5973	5824	5828	6677	7230	7224	6979	6676.81
unknown324	0.00980952	0.0831033	18	9	999.495	0.610258	1	20	5.99999	5239.25	0.0366261	0.183249	19	7.6	4370.11	902.578	0.206534	2801	2408	3497	3882	4787	6022	5583	4565	5318	4162	3393	3993	4542	4468	4444	3218	4192.69
unknown36	0.00980952	0.0831033	24	9	2148.01	0.12275	0.900865	20	6	13537	0.00929823	0.14806	22	7.425	10465.8	2706.98	0.25865	7032	8459	9031	10414	12738	17362	12602	11446	12469	10453	10067	8171	8371	9233	8507	7463	10238.6
unknown394	0.00980952	0.0831033	18	9	4570.38	0.477735	0.938088	20	6	18584	0.0298197	0.180106	19	7.6	13070.6	4995.81	0.382217	4576	4692	9060	9495	15816	26623	18213	13684	13894	11678	10010	9210	14706	14302	9206	8252	12088.6
unknown425	0.00980952	0.0831033	18	9	1101.67	0.803744	1	20	6.00001	4602.25	0.0460673	0.195503	19	7.6	3508.83	1172.96	0.334287	1723	1921	2538	1371	4246	7619	3587	2957	2901	3385	3825	3338	2632	3653	2643	4113	3278.25
unknown428	0.00980952	0.0831033	18	9	1021.42	0.319903	0.900865	20	6	4604.75	0.0212265	0.168352	19	7.6	3228.83	1222.91	0.378747	1780	2205	2002	2445	3614	7108	4367	3330	4079	3063	2464	1632	2358	2652	2004	2712	2988.44
unknown44	0.00980952	0.0831033	18	9	20900.1	0.213351	0.900865	20	6	125401	0.0150042	0.162391	19	7.6	74930.5	39908.4	0.532605	25158	31255	40334	93176	59017	201750	136436	104400	73696	55438	44315	42589	43364	50069	41390	30980	67085.4
unknown453	0.00980952	0.0831033	18	9	1894.16	0.754397	1	20	6	9570.5	0.0437078	0.193157	19	7.6	7152.38	2155.32	0.301343	3309	3987	5481	4637	9458	14708	7667	6449	7057	6200	6604	5113	8714	6772	5991	5512	6728.69
unknown48	0.00980952	0.0831033	18	9	41269.6	0.564031	0.97488	20	6	201894	0.0342875	0.182745	19	7.6	153583	42891.1	0.27927	82931	77354	108023	131643	171792	277693	192839	165253	158308	142750	130677	110838	172825	165142	125820	108538	145152
unknown523	0.00980952	0.0831033	18	9	1226.12	0.383923	0.906601	20	6	5826.25	0.0247874	0.174973	19	7.6	4436.2	1278.83	0.288272	2679	2150	2626	4362	4444	7291	5719	5851	4962	3853	3955	3272	4650	4499	3619	3025	4184.81
unknown545	0.00980952	0.0831033	18	9	3028.54	0.257982	0.900865	20	6	15155.8	0.0176623	0.168352	19	7.6	10412.9	4027.26	0.386756	4955	4097	7192	9225	11382	21808	14264	13169	9581	9057	8441	7331	10446	9623	8390	4979	9621.25
unknown601	0.00980952	0.0831033	18	9	908.102	0.0971666	0.900865	20	6.00002	4298.5	0.00758307	0.143059	19	7.60001	2781.8	1252.61	0.450287	985	1202	2117	2585	3097	3957	4253	5887	2146	1936	2487	2205	1866	1671	1772	2403	2535.56
unknown67	0.00980952	0.0831033	18	9	43175.9	0.5067	0.957437	20	6	246743	0.0313351	0.180547	19	7.6	194077	46621.1	0.24022	116633	114135	147096	171089	215581	326030	236763	208598	201719	177251	169294	150270	212368	203985	163867	143914	184912
unknown690	0.00980952	0.0831033	24	15	1678.32	0.0945361	0.900865	23.9024	12	4382.75	0.00740323	0.142053	23.9512	13.497	3063.27	1185.13	0.386883	1825	1550	2902	756	3347	1992	1123	1318	4369	2640	6222	4300	5202	3853	3677	3920	3062.25
unknown694	0.00980952	0.0831033	18	9	984.293	0.29815	0.900865	20	6	4215.75	0.0199891	0.168352	19	7.6	3215.62	1098.13	0.3415	2505	2324	1128	2514	4534	5464	3692	3173	4519	3452	1860	3008	2961	2760	1796	2306	2999.75
unknown708	0.00980952	0.0831033	18	9	1400.07	0.362001	0.900865	20	6.00001	7760.75	0.0235809	0.174716	19	7.60001	5249.41	2055	0.391474	2403	2488	3629	4412	5941	12357	7131	5614	5208	4139	4323	3069	5391	4135	3466	3821	4845.44
unknown778	0.00980952	0.0831033	18	9	1421.99	0.507932	0.957437	20	6.00001	7483	0.0313992	0.180547	19	7.60001	5006.71	2027	0.404856	2015	2128	3182	4420	5197	12894	5708	6133	4393	4147	4150	3070	4932	4134	3763	3466	4608.25
unknown796	0.00980952	0.0831033	18	9	635.512	0.126582	0.900865	20	6	4809.25	0.00955034	0.14806	19	7.6	2835.65	1465.52	0.516821	1358	1216	1295	3536	2745	7219	5144	4129	1893	2083	2000	1516	1713	2104	1478	1332	2547.56
unknown801	0.00980952	0.0831033	18	9	1046.16	0.139558	0.900865	20	6.00001	5548.25	0.0103958	0.150181	19	7.60001	3933.51	1347.18	0.342487	1984	1881	2598	4492	4428	5655	5384	6726	2878	2845	4021	3520	2554	3252	2779	3702	3668.69
unknown811	0.00980952	0.0831033	18	9	567.63	0.671404	1	20	6	3910.75	0.039667	0.187143	19	7.6	3162.16	672.613	0.212707	2289	1911	2693	2461	4233	5228	3409	2773	3249	2966	2669	2714	3094	3639	2537	2614	3029.94
unknown825	0.00980952	0.0831033	18	6	2055.56	0.10013	0.900865	20	5.99998	6585.25	0.00778486	0.14396	19	6.01666	4332.56	2131.14	0.49189	3208	3443	2761	5307	7243	7702	6864	4532	2853	1773	2631	2437	5278	2462	3926	2769	4074.31
unknown855	0.00980952	0.0831033	18	9	580.358	0.29207	0.900865	20	6	2233	0.0196405	0.168352	19	7.6	1412.6	687.553	0.48673	645	268	683	1164	1520	1978	2038	3396	716	844	1424	1331	1037	1427	876	1092	1277.44
unknown859	0.00980952	0.0831033	24	9	730.795	0.290509	0.900865	20	5.99999	4288.25	0.0195508	0.168352	22	7.42499	2654.27	1249.15	0.470618	1313	1973	1650	2983	2312	7422	4044	3375	2835	2404	1937	1948	1724	1783	1871	1217	2549.44
unknown911	0.00980952	0.0831033	18	9	489.318	0.125058	0.900865	20	6	2366.5	0.00945018	0.14806	19	7.6	1644.16	656.42	0.399243	709	832	1175	1827	1554	3060	2407	2445	1454	1040	1510	1862	967	1018	1081	1301	1515.12
unknown96	0.00980952	0.0831033	18	9	14431	0.640403	1	20	6	63443.8	0.0381324	0.185568	19	7.6	50337.9	13143.4	0.261103	24669	23819	42447	37891	65918	77570	61238	49049	57089	47793	43043	41212	59612	55113	41947	35657	47754.2
unknown971	0.00980952	0.0831033	18	9	431.689	0.465825	0.934611	20	6.00002	2298	0.0291917	0.180106	19	7.60001	1923.88	425.451	0.221142	1382	1324	1677	1383	3046	1735	2278	2133	1716	2300	1993	1716	1326	2125	1476	1834	1840.25
unknown98	0.00980952	0.0831033	18	9	8947.38	0.448621	0.926663	20	6	40954	0.0282792	0.179233	19	7.6	30581.1	9618.88	0.314537	14343	13920	23523	24096	36749	55732	40765	30570	32846	27103	26574	23133	33480	31463	24560	20187	28690.2
unknown1449	0.0121536	0.0927276	18	9	463.862	0.113995	0.900865	20	5.99999	2009.5	0.0105041	0.150181	19	7.59999	1191.78	637.608	0.535006	348	470	603	1162	1406	1813	2054	2765	689	470	1131	970	684	630	688	1180	1066.44
CAR 16:1	0.0144977	0.0927276	18	6	1645.26	0.426189	0.916342	20	6.00001	4266.5	0.037608	0.184465	19	6.01667	2757.16	1531.09	0.555312	1477	1142	1101	4154	3692	6265	3225	3884	965	2397	1458	1348	2315	2030	2683	3010	2571.62
CL 66:7|CL 32:2_34:5	0.0144977	0.0927276	18	9	387.141	0.52127	0.957474	20	6	3608	0.0444762	0.193777	19	7.6	2969.78	547.005	0.18419	2256	2215	2418	2873	3063	4916	3369	3084	2956	2541	3078	2378	3351	2446	2525	2327	2862.25
Cer 38:1;3O|Cer 16:1;2O/22:0;(2OH)	0.0144977	0.0927276	18	6	7636.75	0.326732	0.900865	20	6.00002	28406.2	0.0300904	0.180106	19	6.01667	20017.2	9420.62	0.470627	10316	10758	11569	18692	25199	38075	25866	24485	18280	15288	15590	13652	19403	22178	15964	16694	18875.6
Cer 43:0;4O|Cer 18:0;3O/25:0;(2OH)	0.0144977	0.0927276	18	9	520.961	0.0964477	0.900865	20	5.99998	2268.5	0.0105884	0.150181	19	7.59999	1446.51	637.215	0.440518	526	751	806	1224	2318	1941	2067	2748	932	847	1358	1046	926	1149	970	1531	1321.25
Cer 45:0;4O|Cer 20:0;3O/25:0;(2OH)	0.0144977	0.0927276	18	9	2420.25	0.227839	0.900865	20	6.00001	9629.25	0.0221737	0.171798	19	7.60001	6252.64	2762.98	0.44189	2210	2656	3727	5081	10852	7102	7783	12780	3890	3086	6710	5490	4003	4321	4626	7035	5709.5
Cer d40:0	0.0144977	0.0927276	18	6	471.287	0.133744	0.900865	20	6	1402.75	0.0140491	0.161535	19	6.01667	975.76	456.016	0.467344	546	760	619	811	1380	1338	1416	1477	624	595	847	749	825	726	800	1215	920.5
Cer d42:0	0.0144977	0.0927276	18	9	4084.25	0.113618	0.900865	20	5.99999	20646.8	0.0122036	0.156267	19	7.6	12601.6	6223.59	0.493873	4106	5305	6731	14444	16927	16298	21303	28059	7793	6017	12216	9578	5938	7690	7203	12443	11378.2
HexCer 34:2;3O|HexCer 19:2;2O/15:0;O	0.0144977	0.0927276	18	9	3188.7	0.21511	0.900865	20	5.99998	19036.5	0.0211141	0.168352	19	7.59999	13417.6	4457.83	0.332237	7558	7044	9110	13267	13083	25895	19837	17331	12513	10872	10286	9802	13011	12074	9639	9339	12541.3
LPC 20:1	0.0144977	0.0927276	18	9	231.224	0.434072	0.918464	20	6	793	0.0381882	0.185568	19	7.6	514.574	230.885	0.448691	185	109	218	392	701	1154	631	686	350	554	296	350	446	537	376	522	469.188
LPE-N (FA)34:4|LPE-N (FA 20:3)14:1	0.0144977	0.0927276	18	9	1716.15	0.140344	0.900865	20	6	12315.2	0.0146443	0.16191	19	7.6	8198.57	2954.03	0.36031	4315	4634	4634	10394	8822	16203	13015	11221	7061	5717	5550	5591	7406	6813	5490	5020	7617.88
PC 16:0/9:0 CHO	0.0144977	0.0927276	18	6	1164.07	0.988931	1	20	6	4694	0.0751973	0.231401	19	6.01666	3075.61	1850.45	0.601652	870	720	1608	2787	3033	9024	3668	3051	1937	1749	1510	1833	2124	2299	6460	2949	2851.38
PC 32:3|PC 14:1_18:2	0.0144977	0.0927276	18	9	32818.2	0.295808	0.900865	20	6	121703	0.0276689	0.177639	19	7.6	86303.3	32570.5	0.377396	41013	33093	62051	63857	111130	164225	118091	93366	95735	85246	62413	59743	96367	80840	63097	48143	79900.6
PC 34:2	0.0144977	0.0927276	18	9	866356	0.474258	0.936179	20	6	6044040	0.0411148	0.188217	19	7.6	5.06324e+06	919029	0.18151	3352504	3031630	4352649	5031166	5381379	6961925	6164655	5668201	5355709	4785619	4662398	4296574	5410545	5094817	4558695	4012847	4.88258e+06
PC 38:3	0.0144977	0.0927276	18	9	6251.88	0.68277	1	20	6	38199.5	0.0555843	0.210664	19	7.6	31970.6	5953.84	0.186228	20337	19827	26886	28050	35697	46254	37624	33223	35442	30995	28699	25290	35427	33923	29807	25323	30800.2
PE 34:2	0.0144977	0.0927276	18	9	333115	0.54207	0.964892	20	6	1.94784e+06	0.0459434	0.195346	19	7.6	1.55877e+06	348559	0.223611	952018	917208	1221486	1397685	1715808	2510920	1911261	1653388	1605235	1449683	1389710	1229754	1727183	1628626	1331549	1202507	1.49025e+06
PS 38:2|PS 20:0_18:2	0.0144977	0.0927276	24	9	1708.37	0.155952	0.900865	20	6	8785.75	0.0160346	0.164297	22	7.425	5019.38	2631.12	0.524193	2459	2318	3053	7386	3545	10950	10613	10035	4827	2981	4382	3003	4368	2338	2224	2295	4798.56
TG 52:2	0.0144977	0.0927276	24	9	29631	0.189674	0.900865	20	6	165490	0.0189635	0.168352	22	7.425	95040.3	49771.5	0.523688	41702	78049	57631	96630	104665	278422	155961	122910	99124	89074	59553	42538	50191	76237	52688	48436	90863.2
TG 52:5	0.0144977	0.0927276	24	9	8614.33	0.110658	0.900865	20	5.99998	41732.8	0.011928	0.156267	22	7.42499	19944.9	16795.4	0.842088	6798	6834	10118	18461	11467	57805	53835	43824	25742	13270	14825	6722	7808	9214	5433	4410	18535.4
unknown1032	0.0144977	0.0927276	24	9	4674.68	0.0610748	0.900865	20	6	18503.5	0.00710961	0.142053	22	7.425	9454	6513.93	0.689014	1907	6267	4888	10937	12912	26427	17840	16835	9846	8382	5533	3280	2693	7327	4218	3225	8907.31
unknown1216	0.0144977	0.0927276	24	6	1133.85	0.193119	0.900865	21.8859	6.00001	12123.8	0.0192575	0.168352	22.9429	6.01277	10320.5	1652.93	0.160159	10499	10164	9225	11036	12560	14132	11248	10555	9514	8963	11478	9566	11005	7954	8230	8109	10264.9
unknown1272	0.0144977	0.0927276	24	6	1107.33	0.144341	0.900865	27.4766	6	4417.75	0.0150027	0.162391	25.7383	6.02749	3414.27	706.343	0.20688	4713	2840	4896	4207	3460	6126	4294	3791	2975	3124	3135	3354	3199	1140	2496	1544	3455.88
unknown129	0.0144977	0.0927276	18	6	7125.52	0.215716	0.900865	20	6	18866.8	0.0211648	0.168352	19	6.01667	11485.7	7319.25	0.637249	6879	5357	6488	14149	18914	24673	21193	10687	7110	3511	6703	4854	15204	5771	10981	7106	10598.8
unknown1388	0.0144977	0.0927276	24	6	1137.73	0.125306	0.900865	24.7059	6	5622	0.0132811	0.158596	24.3529	6.00126	4383.54	1042.87	0.237906	5024	4712	4550	4753	6136	6604	5130	4618	3335	3611	5311	4302	4799	2030	2747	2669	4395.69
unknown139	0.0144977	0.0927276	18	9	2632.38	0.0809665	0.900865	20	6.00002	9476	0.00909423	0.14806	19	7.60001	5604.87	3248.06	0.579507	2020	1900	2999	5267	5906	9159	10521	12318	2306	3326	6815	4447	2845	2700	3065	3868	4966.38
unknown1434	0.0144977	0.0927276	18	6	4380.17	0.541464	0.964892	20	6.00002	15703.8	0.0459008	0.195346	19	6.01667	10421.8	5115.06	0.490805	8239	7818	5333	11971	24770	14990	15381	7674	6526	1989	7108	4732	14983	5005	12475	7837	9801.94
unknown1439	0.0144977	0.0927276	24	6	1377.44	0.135076	0.900865	28	6.63e-05	4204.5	0.0141696	0.161535	26	3.25003	3050.39	767.566	0.251629	5921	3555	3976	3366	4384	5313	3414	2802	1778	2482	3874	2674	2735	369	1420	943	3062.88
unknown154	0.0144977	0.0927276	18	9	17146.1	0.386427	0.906601	20	6	91098.8	0.0346479	0.183249	19	7.6	67258.6	20466.5	0.304295	34796	31191	50379	65494	67915	125361	91865	79254	69072	59516	55603	48701	69041	65879	54415	43284	63235.4
unknown1572	0.0144977	0.0927276	18	9	641.699	0.557334	0.973164	20	6	5964.5	0.0470127	0.197647	19	7.6	3761.12	1587.14	0.421985	1694	1834	1949	5553	3197	11154	6307	3200	2883	2830	2338	2440	2618	2552	2657	1980	3449.12
unknown1576	0.0144977	0.0927276	18	6	2397.8	0.513603	0.957474	20	5.99999	8344.25	0.0439323	0.193654	19	6.01666	5412.86	2862.9	0.528906	3972	4082	2813	5888	13238	8819	7626	3694	2983	1207	3535	2478	7690	2612	6309	4109	5065.94
unknown1577	0.0144977	0.0927276	18	9	2434.57	0.122486	0.900865	20	5.99999	10267.5	0.0130226	0.158043	19	7.59999	5830.66	3470.81	0.595269	1600	1680	2423	5560	6912	8532	11021	14605	3071	2086	4880	5140	3007	2701	3579	5577	5148.38
unknown1583	0.0144977	0.0927276	18	9	406.94	0.0833623	0.900865	20	6	1617.5	0.00932809	0.14806	19	7.6	948.533	528.583	0.557264	258	363	447	888	1339	1489	1522	2120	537	383	913	765	441	527	562	960	844.625
unknown1684	0.0144977	0.0927276	18	9	2794.31	0.858852	1	27.3065	5.99999	12003.2	0.0670623	0.224249	22.6533	8.15208	9496.84	2152.13	0.226615	4439	4846	7642	7115	8862	17117	12551	9483	11590	9201	9048	8386	12232	10950	8690	7695	9365.44
unknown1691	0.0144977	0.0927276	24	15	1633.24	0.134255	0.900865	20.464	12	6473.25	0.0140953	0.161535	22.232	13.4659	4305.06	2593.42	0.602412	2622	2743	5147	1391	3780	2501	2215	3283	9047	4289	5972	6585	4406	3576	4553	5732	4240.12
unknown189	0.0144977	0.0927276	18	9	41287.4	0.254823	0.900865	20	6	191147	0.0243862	0.174973	19	7.6	127667	52897.3	0.414339	53174	44340	81894	119043	128570	271675	191503	172840	129156	104029	90718	83857	124740	116095	93358	71300	117268
unknown236	0.0144977	0.0927276	18	9	20863.9	0.728397	1	20	5.99999	126266	0.0586156	0.213999	19	7.6	106018	20697.2	0.195223	68163	60036	90963	83125	121218	156081	118550	109214	110372	111351	96859	87181	121749	109614	102579	84136	101949
unknown243	0.0144977	0.0927276	18	9	4439.57	0.320363	0.900865	20	6.00001	22637.2	0.0295953	0.180106	19	7.60001	16089.2	5314.03	0.330286	7614	8519	10939	15088	16509	30204	25007	18829	15677	14664	11157	11193	16709	16254	11087	11263	15044.6
unknown246	0.0144977	0.0927276	18	9	15506.5	0.301987	0.900865	20	6.00001	68362.2	0.0281563	0.179233	19	7.60001	42866.8	20739.3	0.483808	15243	10754	23607	37628	42378	105426	66525	59120	40432	31583	28830	26019	41640	41286	29360	20808	38789.9
unknown317	0.0144977	0.0927276	18	9	5533.46	0.587443	0.990234	20	6.00001	24850.8	0.0491044	0.201529	19	7.6	18383.8	6069.67	0.330164	6292	5857	13948	15985	19981	33625	24759	21038	18729	16559	16402	13900	20921	20148	15700	11206	17190.6
unknown331	0.0144977	0.0927276	18	9	5646.07	0.314483	0.900865	20	6	26593	0.0291365	0.180106	19	7.6	18954.8	6658.72	0.351294	9504	7875	12999	17365	20467	36578	27390	21937	19351	16833	15830	12894	20487	17656	14658	10510	17645.9
unknown363	0.0144977	0.0927276	18	9	3061.07	0.331664	0.900865	20	6.00001	14464.2	0.0304726	0.180106	19	7.60001	9606.44	3942.79	0.410432	3580	3579	6351	8655	9624	21673	14139	12421	9008	7428	7535	5849	9395	9484	6846	5735	8831.38
unknown381	0.0144977	0.0927276	24	9	4106.88	0.204282	0.900865	20	5.99999	20507	0.0202043	0.168352	22	7.42499	10511.8	7532.16	0.716541	3844	5030	4682	11012	6701	34841	22259	18227	13279	7683	6340	4753	5657	6113	4253	3401	9879.69
unknown398	0.0144977	0.0927276	18	9	734.684	0.934833	1	20	6	5507	0.0718463	0.228275	19	7.6	4325.24	1035.14	0.239326	2455	2232	3536	3381	4631	8692	4560	4145	4176	3979	4022	3172	5706	4079	3760	3422	4121.75
unknown403	0.0144977	0.0927276	24	9	8361.54	0.106947	0.900865	20	5.99999	36509.8	0.0115809	0.155747	22	7.425	19926.7	12182.4	0.611363	6959	12329	11260	21720	23926	56666	36869	28578	22323	17099	13289	8568	9049	14855	9180	9798	18904.2
unknown416	0.0144977	0.0927276	24	9	887.065	0.255799	0.900865	20	5.99998	8047	0.0244654	0.174973	22	7.42499	6101.26	1500	0.24585	4051	5117	4695	7046	6176	10898	8757	6357	6267	5411	5744	5247	4579	5728	4474	5059	5975.38
unknown427	0.0144977	0.0927276	18	9	1546.97	0.799535	1	20	6	7313.5	0.0632601	0.217487	19	7.6	5649.98	1712.64	0.303122	3283	3559	3574	3965	6017	11836	5808	5593	7840	5445	3865	4423	6569	5792	3591	3853	5313.31
unknown491	0.0144977	0.0927276	18	9	1661.7	0.528015	0.964518	20	6	8756.25	0.0449532	0.194077	19	7.6	6453.95	2221.84	0.34426	3526	4473	4881	4372	6582	14143	7659	6641	8906	6147	5047	3888	5458	6372	3688	4492	6017.19
unknown502	0.0144977	0.0927276	18	9	1047.58	0.123008	0.900865	20	6	5064.5	0.0130706	0.158043	19	7.6	3698.23	1202.05	0.325033	1979	1836	2911	3840	4728	4711	4516	6303	2762	2685	4057	3588	2964	3089	2286	3136	3461.94
unknown534	0.0144977	0.0927276	18	9	2612.76	0.521136	0.957474	20	6.00001	10843.5	0.0444667	0.193777	19	7.6	7635.64	3038.29	0.39791	2680	638	5456	6642	8758	15128	10360	9128	7807	6955	6159	5975	8916	8069	6194	3749	7038.38
unknown535	0.0144977	0.0927276	18	9	1929.34	0.357119	0.900865	20	6	10864.8	0.0324284	0.181473	19	7.6	8640.81	2030.66	0.235008	4459	4928	6952	8991	9708	11485	11614	10652	9304	8152	7420	6912	9499	8601	6404	6785	8241.62
unknown539	0.0144977	0.0927276	18	9	1108.74	0.786736	1	27.3065	5.99999	4668.75	0.0624316	0.215955	22.6533	8.15208	3784.41	772.318	0.204079	2260	2028	2907	2887	4710	5801	4413	3751	3890	4765	3695	2941	3775	5325	3609	3039	3737.25
unknown603	0.0144977	0.0927276	18	9	3545.79	0.912311	1	20	5.99999	14705.2	0.0704379	0.227074	19	7.6	11716.3	3020.88	0.257835	5688	6033	8318	7894	15858	19523	13380	10060	12834	13000	9207	8674	14243	14800	9981	8467	11122.5
unknown623	0.0144977	0.0927276	24	15	462.625	0.335621	0.900865	24.0327	12	4784.5	0.0307784	0.180106	24.0163	13.501	4348.32	411.294	0.0945868	4157	4245	4301	2929	4300	4402	3996	3439	4793	4539	5367	4439	5040	4955	4422	4251	4348.44
unknown64	0.0144977	0.0927276	24	9	4200.57	0.148325	0.900865	20	5.99998	19353.5	0.0153582	0.162391	22	7.42499	9121.71	7893.4	0.865342	2530	3092	3576	8783	4489	30486	22264	20175	11248	8046	4907	3176	3016	4160	3283	2117	8459.25
unknown641	0.0144977	0.0927276	18	9	752.362	0.161856	0.900865	20	6.00001	6261.75	0.0165544	0.166658	19	7.60001	5100.66	953.371	0.186911	3492	3707	4235	5411	5304	7088	6377	6278	4954	4551	4751	4238	4948	4636	4545	4097	4913.25
unknown648	0.0144977	0.0927276	18	9	4451.41	0.199473	0.900865	20	6.00001	26783.2	0.0197975	0.168352	19	7.60001	20768.9	4912.12	0.236514	14082	12020	18531	18332	26620	32427	24796	23290	19857	18470	18761	15549	21734	19820	16435	16128	19803.2
unknown684	0.0144977	0.0927276	18	9	2391.08	0.728965	1	26.3284	6.00002	9993.25	0.0586532	0.213999	22.1642	8.06656	7835.21	1887.34	0.24088	4466	4006	5914	5570	10346	12955	8771	7901	8979	9055	6797	6543	9503	9696	6308	6059	7679.31
unknown688	0.0144977	0.0927276	24	9	1662.05	0.181623	0.900865	20	6	6439.25	0.0182727	0.168352	22	7.425	3508.45	2450.17	0.698365	1372	1336	2119	3651	1724	9007	8540	6486	5004	2788	3382	1462	1790	1679	1199	1306	3302.81
unknown764	0.0144977	0.0927276	18	9	762.968	0.1903	0.900865	20	6	5753	0.019017	0.168352	19	7.6	3401.74	1678.03	0.493285	1214	1399	1542	5164	2903	8336	6744	5029	2357	2414	1929	1939	2017	2626	1735	1802	3071.88
unknown77	0.0144977	0.0927276	24	9	43232.9	0.085778	0.900865	20	6	204666	0.00956287	0.14806	22	7.425	111999	66950.4	0.597775	41152	76156	68196	118862	127676	298514	220436	172038	126085	93269	77146	42489	46560	86245	51698	55565	106380
unknown785	0.0144977	0.0927276	18	9	1203.85	0.827739	1	20	6.00002	5535.75	0.0650757	0.221021	19	7.60001	4592.53	928.857	0.202254	2529	2284	3821	3852	6092	6619	4699	4733	4443	4566	3937	4281	4754	5162	4368	4419	4409.94
unknown789	0.0144977	0.0927276	24	9	662.559	0.0833468	0.900865	20	6	4086.25	0.00932658	0.14806	22	7.425	2377.94	1210.92	0.509231	1647	1178	1965	2343	2415	5871	4145	3914	2513	2075	1821	978	1204	1675	1149	1528	2276.31
unknown878	0.0144977	0.0927276	18	9	1589.75	0.184205	0.900865	20	6	6973.5	0.0184948	0.168352	19	7.6	4785.42	1824.91	0.381348	2061	2078	3288	4228	5758	9282	6932	5922	4922	4138	3432	3076	4316	4329	3953	3112	4426.69
unknown906	0.0144977	0.0927276	24	9	5888.08	0.117706	0.900865	23.0287	6.00002	33230.2	0.0125824	0.158043	23.5144	7.47222	25007.7	6969.85	0.278708	17108	18928	28804	29046	26732	40858	29562	35769	28885	24470	20725	26910	21364	15972	19699	12982	24863.4
unknown918	0.0144977	0.0927276	18	6	1042.81	0.733417	1	20	6	4588.75	0.0589466	0.214482	19	6.01667	3686.54	1081.9	0.293473	2194	2303	2713	3447	4203	5275	4496	4381	3644	3233	2842	2949	3448	4380	3501	3878	3555.44
TG 45:2|TG 12:0_16:1_17:1	0.0177588	0.0995561	18	9	1724.1	0.342076	0.900865	20	5.99999	7532.25	0.0370785	0.183939	19	7.59999	5510.77	2223.44	0.403472	2873	3709	3979	3686	5713	11881	7226	5309	8759	5524	4377	3600	4057	4550	2873	3063	5073.69
unknown1376	0.0177588	0.0995561	18	6	2018.44	0.423127	0.912077	20	5.99999	8106.75	0.044266	0.193777	19	6.01666	6192.3	2126.38	0.34339	3738	4343	3944	6338	7135	9396	8498	7398	5245	4491	5200	4782	5790	7135	4951	6570	5934.62
unknown1556	0.0177588	0.0995561	18	9	755.19	0.47656	0.938088	20	6	2458.5	0.0488495	0.201529	19	7.6	1552.96	787.649	0.507192	478	470	1039	410	3186	1391	2067	3190	810	698	1796	1495	1120	839	1391	1990	1398.12
unknown1597	0.0177588	0.0995561	18	9	1665.59	0.447036	0.926663	20	6.00002	7296.5	0.0463309	0.196251	19	7.60001	5712.83	1600.9	0.280229	3020	3249	5167	4242	8301	9261	5524	6100	5685	3500	7104	5524	4509	4136	5074	5974	5398.12
unknown1702	0.0177588	0.0995561	18	9	4084.6	0.330527	0.900865	20	6	11621	0.0360283	0.183249	19	7.6	6276.64	4408.63	0.702387	324	262	1648	3803	6900	16967	12479	10138	6054	4989	4325	501	6646	8771	2491	262	5410
unknown328	0.0177588	0.0995561	18	9	1185.82	0.64368	1	20	6	6917.25	0.0625438	0.215955	19	7.6	5377.11	1353.38	0.251693	3332	2891	4065	4653	5959	9708	7205	4797	5731	5278	4107	4067	5472	5271	5134	4107	5111.06
CAR 22:0	0.0210199	0.0995561	18	9	5435.18	0.190428	0.900865	20	6.00001	28762.8	0.0261012	0.175441	19	7.60001	20093.6	7030.2	0.349872	11168	8769	15691	17472	22196	40053	29034	23768	17700	16968	16065	14626	18114	16292	14757	16713	18711.6
CL 68:5|CL 34:2_34:3	0.0210199	0.0995561	18	9	1766.88	0.515591	0.957474	20	6	10413.8	0.0598751	0.21493	19	7.6	7988.16	2123.07	0.265777	4189	4840	5855	7119	10830	14108	8200	8517	8023	5867	8325	6104	9097	6971	7054	6034	7570.81
CL 68:7|CL 16:1_16:1_18:2_18:3	0.0210199	0.0995561	18	9	1176.98	0.409437	0.908997	20	6	6339.5	0.0495316	0.201728	19	7.6	4911.09	1214.66	0.24733	2698	3369	3348	4649	6354	8060	5923	5021	5120	4154	4576	3470	5462	4528	4280	3745	4672.31
Cer 33:0;2O|Cer 14:0;2O/19:0	0.0210199	0.0995561	18	9	210.718	0.184946	0.900865	20	6.00001	2135	0.0254633	0.174973	19	7.6	1221.03	619.516	0.50737	464	626	537	1923	929	3322	2241	2048	714	767	748	571	730	744	572	652	1099.25
Cer 38:1;3O	0.0210199	0.0995561	18	6	8354.82	0.467325	0.934611	20	6.00002	32965.2	0.0552356	0.210533	19	6.01667	23264.6	10928.7	0.469757	11836	12839	13310	21255	29231	47798	29135	25697	20300	18681	17087	16418	23063	25883	19156	19355	21940.2
Cer 40:2;3O|Cer 16:2;2O/24:0;(2OH)	0.0210199	0.0995561	24	18	2443.76	0.707959	1	28	17.9999	7865.49	0.0774962	0.235517	26	18.1071	5924.84	657.738	0.111014	4473	4942	5809	1622	11657	2991	1950	1936	8108	6181	6984	6123	8678	8622	7098	7064	5889.88
Cer 45:0;3O|Cer 20:0;3O/25:0	0.0210199	0.0995561	18	6	196.045	0.999533	1	20	6	1110	0.102167	0.258557	19	6.01667	928.114	215.495	0.232186	684	730	667	792	1534	881	997	1028	626	578	1015	751	862	904	886	1497	902
DG 32:2|DG 14:1_18:1	0.0210199	0.0995561	24	9	1502.43	0.154237	0.900865	20	6	8187.75	0.0218239	0.170713	22	7.425	5272.9	2154.69	0.408636	2704	3317	3601	6977	4739	10684	9606	7722	5887	3777	4159	4165	3980	4263	3216	2676	5092.06
DG 34:2	0.0210199	0.0995561	18	9	3116.22	0.0850166	0.900865	20	6	20080.8	0.013094	0.158043	19	7.6	12785.2	5662.5	0.442895	5791	7042	8848	13476	12860	26527	23207	17729	11221	9068	9731	8265	9642	9683	6559	7104	11672.1
FA 19:0	0.0210199	0.0995561	18	9	5109.91	0.928797	1	20	6	25876	0.0963694	0.251937	19	7.6	20129.4	4498.92	0.2235	10619	13380	12590	15373	33920	26695	23093	19796	19580	13564	16935	17066	19052	26560	15615	24082	19245
FA 20:1 (eicosenoic acid)	0.0210199	0.0995561	18	6	3231.3	0.902624	1	20	6	16104.2	0.0941961	0.248341	19	6.01667	13006.8	3807.46	0.292728	7408	9063	8528	11614	19851	16733	13475	14358	12282	9781	11278	11110	13233	14929	12595	14489	12545.4
HexCer 36:2;3O|HexCer 16:2;2O/20:0;O	0.0210199	0.0995561	18	9	9315.42	0.563592	0.97488	20	6	50643.8	0.0643949	0.220281	19	7.6	40022.7	9890.25	0.247116	22829	22723	30802	34278	45607	68106	47368	41494	43510	37247	36087	30141	44418	41677	32319	30650	38078.5
PC 33:2	0.0210199	0.0995561	18	9	19092.9	0.606372	1	20	5.99999	101930	0.0683503	0.224673	19	7.6	83535.4	19154.9	0.229303	46754	42162	73183	68572	96696	125031	95202	90790	99483	80485	73852	67698	95288	85450	74395	61278	79769.9
PC 34:3	0.0210199	0.0995561	18	9	7850.12	0.361347	0.900865	20	6	81840	0.0446628	0.193798	19	7.6	70528.4	9410.1	0.133423	52461	62568	58431	69882	90779	91531	73965	71085	70696	61385	69990	61387	72944	67466	65388	58900	68678.6
PC 38:4 Isomer C	0.0210199	0.0995561	18	9	1759.64	0.674912	1	25.7143	5.99999	12416.2	0.0745569	0.230842	21.8571	8.01428	10421.7	1903.92	0.182688	6634	5563	9304	9402	11692	15187	11635	11151	10602	12229	10246	9320	12406	11036	9641	7780	10239.2
PC 40:8	0.0210199	0.0995561	18	9	1613.79	0.721489	1	20	6.00001	9339.5	0.0786901	0.236815	19	7.6	7866.34	1580.31	0.200896	5075	4107	6899	6576	9687	11092	8292	8287	8435	8947	7516	5761	9532	7372	7182	6131	7555.69
PC O-36:1|PC O-18:0_18:1	0.0210199	0.0995561	24	18	3020.05	0.450296	0.926663	21.995	17.9999	12095.7	0.0535741	0.208447	22.9975	18.0342	8939.83	2122.68	0.237441	9005	9652	9414	1563	15786	2124	707	1215	11845	11815	12510	10258	12929	12581	12059	10814	9017.31
PE 37:1|PE 19:0_18:1	0.0210199	0.0995561	18	6	5827.97	0.470088	0.934611	20	5.99999	28597.5	0.0555038	0.210664	19	6.01666	21581.1	7710.15	0.357264	12460	15169	14020	22755	25598	39795	25559	23438	17653	18144	17770	16720	21733	22053	19553	17929	20646.8
PE 37:2|PE 19:0_18:2	0.0210199	0.0995561	18	9	1546.8	0.449243	0.926663	20	6.00001	10216.2	0.053471	0.208447	19	7.60001	7773.15	1917.3	0.246656	4045	5419	5368	7354	9482	13738	9533	8112	7033	6746	6640	5732	8047	8124	6391	6576	7396.25
PEtOH 34:2|PEtOH 16:0_18:2	0.0210199	0.0995561	24	18	5269.36	0.32838	0.900865	28	17.9999	22880.7	0.0412485	0.188217	26	18.1071	17172.2	1091.82	0.0635807	13071	14965	13776	8771	25849	12274	11948	10070	21594	17493	17224	15269	24481	25760	21125	20157	17114.2
PG 32:1|PG 16:0_16:1	0.0210199	0.0995561	18	9	3164.3	0.332134	0.900865	20	6.00002	22905	0.0416407	0.189237	19	7.60001	17644.5	4118.09	0.233393	11721	12270	12177	17556	21765	30396	19341	20118	17150	16424	13998	12806	18068	17121	15433	13015	16834.9
PI 33:1|PI 17:0_16:1	0.0210199	0.0995561	18	9	450.073	0.886202	1	27.8233	6	2042.75	0.0928244	0.247716	22.9117	8.19833	1628.19	320.758	0.197003	956	1036	1159	1190	2623	2376	1555	1617	1882	1521	1568	1418	2043	1998	1433	1422	1612.31
SM d36:3	0.0210199	0.0995561	18	6	288.853	0.34832	0.900865	20	6	1531.75	0.0433216	0.192602	19	6.01667	1033.86	531.096	0.513703	715	427	839	830	1129	2194	1784	1020	707	628	991	712	795	1080	1008	653	969.5
TG 42:0	0.0210199	0.0995561	18	9	93193.1	0.264258	0.900865	20	6	687734	0.0344007	0.182745	19	7.6	400256	221280	0.552845	144556	140782	197603	510163	273325	1156065	762960	558586	367856	275603	228915	214137	237072	258346	219167	162985	356758
TG 44:0	0.0210199	0.0995561	18	9	23518.4	0.233168	0.900865	20	5.99999	133181	0.0309669	0.180106	19	7.59999	82699.5	41222.1	0.498457	29443	37042	44903	104737	65965	209316	149023	108421	84397	67040	58681	44920	48605	59729	45462	35854	74596.1
TG 49:3	0.0210199	0.0995561	24	9	891.308	0.137045	0.900865	20	6.00002	3912.25	0.0197319	0.168352	22	7.42501	2508.3	1148.97	0.458067	1062	1929	2061	2275	2610	5077	4380	3582	3648	2649	1823	1074	1588	1690	1773	1369	2411.88
TG 50:3 Isomer A	0.0210199	0.0995561	24	9	76095.8	0.0932032	0.900865	20	6	358555	0.0141747	0.161535	22	7.425	192105	120068	0.625014	69149	123320	112226	205369	213059	536207	386637	298318	218315	153014	128159	71821	76312	144527	84121	91892	182028
TG 54:3	0.0210199	0.0995561	18	9	8532.3	0.188697	0.900865	20	6	46568.5	0.0259001	0.174973	19	7.6	26242.9	16019.7	0.61044	10362	14135	11950	24484	19732	80312	48010	38220	25109	19501	14917	11421	14218	14217	11980	10933	23093.8
TG 56:3	0.0210199	0.0995561	24	9	1821.86	0.19946	0.900865	20	6	12848.5	0.0271448	0.177639	22	7.425	6535.29	4453.12	0.681396	2424	4210	2783	6893	4869	22371	13961	10193	6371	4451	4418	2755	3770	4178	2811	2127	6161.56
TG 58:5	0.0210199	0.0995561	18	9	812.112	0.165407	0.900865	20	6	4204.5	0.0231614	0.174716	19	7.6	3084.17	935.279	0.303252	1660	1518	2312	3045	3279	4067	4711	4761	2610	2478	3032	2400	2790	2989	2252	2501	2900.31
unknown1031	0.0210199	0.0995561	18	9	1656.75	0.65407	1	20	6.00001	7870.75	0.0726858	0.228348	19	7.60001	6113.81	1729.92	0.282953	4843	2940	4563	3284	6451	10565	8631	5836	5787	5485	5137	6385	7667	6679	4138	3989	5773.75
unknown1079	0.0210199	0.0995561	18	9	8159.13	0.281044	0.900865	20	5.99999	43056.5	0.0362221	0.183249	19	7.59999	26385.2	13578.7	0.514632	9521	12211	8899	35181	20945	67796	47925	35560	30170	20169	18224	11310	13302	20903	13686	13653	23715.9
unknown1112	0.0210199	0.0995561	18	9	616.951	0.868261	1	20	5.99999	2568.25	0.0913185	0.245442	19	7.6	2153.61	425.013	0.197349	1527	1414	1557	1579	2862	3182	2488	1741	2493	2026	1998	1721	2571	2297	2004	1661	2070.06
unknown1159	0.0210199	0.0995561	24	6	839.689	0.159213	0.900865	20.9501	6.00001	4675.5	0.0224218	0.171798	22.4751	6.02775	3300.06	1249.01	0.378481	2563	2249	3147	4647	3038	5987	5217	4460	2967	3627	2389	2485	1940	2595	2457	2075	3240.19
unknown1174	0.0210199	0.0995561	18	9	2186.73	0.141598	0.900865	20	6	12699	0.0202901	0.168352	19	7.6	7228.87	4018.42	0.555885	2337	2174	3131	9435	7109	11840	12961	18886	4295	3178	5348	4918	4806	3434	3744	5427	6438.94
unknown1190	0.0210199	0.0995561	18	9	679.53	0.164165	0.900865	20	6	3797	0.0230134	0.174544	19	7.6	2144.89	1229.21	0.573088	603	796	987	2153	2874	2617	3724	5973	1179	738	1712	1580	1002	1106	1201	2207	1903.25
unknown1218	0.0210199	0.0995561	18	9	831.558	0.455238	0.926663	20	6	4169.5	0.0540577	0.209595	19	7.6	3341.83	830.874	0.248628	2195	1796	1953	3985	3426	5140	4225	3887	3505	2538	3842	2968	2941	3572	2441	2442	3178.5
unknown122	0.0210199	0.0995561	18	9	16457.2	0.34918	0.900865	20	6	85325.8	0.0434105	0.192602	19	7.6	63093.4	19185.2	0.304076	33028	31321	47687	57521	64052	114590	87228	75433	64544	56123	51734	46617	65764	63944	49048	40519	59322.1
unknown1221	0.0210199	0.0995561	24	12	3115.16	0.168128	0.900865	26.0177	12	27335.8	0.0234848	0.174716	25.0088	12.0196	23692.9	4204.15	0.177444	17117	18610	23453	15782	25706	28253	25068	21104	31008	26017	29059	23259	27607	22118	24605	22574	23833.8
unknown1255	0.0210199	0.0995561	18	9	745.291	0.0973211	0.900865	20	6.00001	3406.5	0.0147126	0.16191	19	7.60001	2292.42	947.069	0.41313	1482	1302	1143	2259	2364	3359	3814	4089	1974	1446	2420	1816	665	1921	1914	1732	2106.25
unknown1270	0.0210199	0.0995561	18	9	341.709	0.187933	0.900865	20	6.00002	2080	0.0258113	0.174973	19	7.60001	1506.87	473.063	0.313938	804	799	1295	1499	1670	2209	1825	2616	1396	1082	1526	1126	829	1667	1244	1035	1413.88
unknown1278	0.0210199	0.0995561	18	9	921.537	0.481553	0.938088	20	6	4533.25	0.0566136	0.212538	19	7.6	3350.37	983.052	0.293416	1811	1427	2565	3036	3550	6127	4041	4415	3430	3112	2607	2183	3377	3764	2832	2237	3157.12
unknown134	0.0210199	0.0995561	18	9	2328.86	0.677862	1	20	6	13747	0.0748207	0.231049	19	7.6	11069	2323.81	0.209939	6602	6195	9004	10046	12869	17404	13334	11381	11223	10146	9494	8944	12197	12344	10053	8559	10612.2
unknown1355	0.0210199	0.0995561	24	9	2032.93	0.101881	0.900865	21.4599	5.99999	11658.2	0.0153039	0.162391	22.7299	7.43941	9148.73	2133.23	0.233173	6404	9123	7175	10510	11463	13421	11602	10147	10454	8815	10091	6923	6200	7755	7292	7169	9034
unknown1392	0.0210199	0.0995561	18	9	395.98	0.177256	0.900865	20	6	1468.25	0.0245628	0.174973	19	7.6	963.32	417.178	0.433063	299	481	419	816	1594	1257	1237	1785	680	537	1028	732	730	808	747	951	881.312
unknown1399	0.0210199	0.0995561	18	9	294.864	0.148115	0.900865	20	6	2157.5	0.0210838	0.168352	19	7.6	1495.68	491.49	0.328607	795	781	938	1963	2055	1981	1859	2735	1297	922	1227	1205	1008	1151	1026	1442	1399.06
unknown140	0.0210199	0.0995561	18	9	4903.26	0.837656	1	20	5.99999	30913.2	0.0887314	0.24374	19	7.59999	26573.9	4388.92	0.165159	16598	17869	23738	21565	29232	37742	31551	25128	28368	25346	24688	23553	30182	29250	24190	22378	25711.1
unknown1402	0.0210199	0.0995561	18	6	4169.1	0.260456	0.900865	20	6	13977.8	0.0339852	0.182092	19	6.01667	8926.7	5218.59	0.584605	3648	5439	4297	10995	8815	20056	15315	11725	6893	5785	5873	4372	7056	8725	6915	6800	8294.31
unknown1456	0.0210199	0.0995561	18	9	1582.15	0.188965	0.900865	20	6.00001	5495	0.0259313	0.174973	19	7.60001	3314.14	1757.64	0.530345	1021	1080	2099	1851	6001	3297	5293	7389	1865	1673	3279	2511	1912	1788	2790	3649	2968.62
unknown1467	0.0210199	0.0995561	18	6	2941.92	0.196621	0.900865	20	5.99999	10951.2	0.0268178	0.177639	19	6.01666	7569.33	3671.35	0.48503	3930	4586	4645	7272	10144	14508	10786	8367	5880	5972	6258	5008	7165	7422	5980	6068	7124.44
unknown1471	0.0210199	0.0995561	24	6	1129.25	0.118692	0.900865	20	6	7013	0.0174481	0.168352	22	6.05	4256.67	2526.65	0.593574	2803	3095	2828	5288	4163	10541	6396	6952	2966	3441	2504	3652	3554	2092	2712	2612	4099.94
unknown1519	0.0210199	0.0995561	18	9	2391.44	0.273645	0.900865	20	6	8771.75	0.0354219	0.183249	19	7.6	5535.58	2808.13	0.507287	1778	1916	3139	4086	13114	5606	6482	9885	3644	2626	6839	4468	3055	3743	4026	5330	4983.56
unknown1520	0.0210199	0.0995561	18	9	701.803	0.0995494	0.900865	20	6	4004.75	0.0150021	0.162391	19	7.6	2515.95	1103.34	0.438536	890	1290	1422	2551	4015	3393	3543	5068	1608	1317	2129	1883	1494	1833	1663	2686	2299.06
unknown1522	0.0210199	0.0995561	18	9	3040.74	0.519811	0.957474	20	6	15222.8	0.0602761	0.21493	19	7.6	11218.6	3392.17	0.302369	3698	6583	6568	12138	13335	20702	14155	12699	9778	9292	10872	8275	11205	12719	8737	8073	10551.8
unknown1545	0.0210199	0.0995561	24	6	4251.13	0.203309	0.900865	21.253	6	76363.5	0.027587	0.177639	22.6265	6.02219	62256.6	13697.5	0.220018	60993	58362	60804	58547	85594	96886	63990	58984	55419	60450	62477	59724	59613	42196	53309	49254	61662.6
unknown1558	0.0210199	0.0995561	18	9	691.197	0.0948911	0.900865	20	6	3475	0.0143956	0.16191	19	7.6	1954.84	1108.15	0.566876	680	613	900	2354	2070	3308	3604	4918	1140	892	1426	1200	1194	1005	1103	1385	1737
unknown1561	0.0210199	0.0995561	18	9	1219.76	0.406052	0.908997	20	6	3699.75	0.0491929	0.201529	19	7.6	2313.72	1218.49	0.526638	676	675	1516	733	4674	1884	3286	4955	1152	1061	2654	2355	1550	1308	2049	2659	2074.19
unknown1581	0.0210199	0.0995561	24	18	1721.45	0.189054	0.900865	25.8651	17.9999	5189.5	0.0259415	0.174973	24.9326	18.0252	3697.54	706.997	0.191207	3114	2408	3763	806	5503	2216	977	976	4528	5099	4756	3944	5304	6013	4859	4582	3678
unknown1600	0.0210199	0.0995561	18	9	465.276	0.109358	0.900865	20	5.99999	2146	0.0162642	0.165217	19	7.6	1288	653.07	0.50704	429	514	658	1343	1543	2038	2173	2830	713	554	1170	1042	753	664	772	1358	1159.62
unknown1620	0.0210199	0.0995561	18	9	2267.16	0.0817213	0.900865	20	6	11780.2	0.0126544	0.158043	19	7.6	6435.68	3892.19	0.604782	1944	1797	2639	7978	7406	11178	12013	16524	3510	2759	4305	4054	3874	2985	3397	4366	5670.56
unknown173	0.0210199	0.0995561	24	9	5063.06	0.106413	0.900865	20	6	23424	0.0158872	0.163609	22	7.425	12497	7976.05	0.638236	5205	7199	7513	15041	10278	33374	27596	22448	14701	10536	8081	4627	4917	8374	4274	5078	11827.6
unknown176	0.0210199	0.0995561	18	9	8811.26	0.487138	0.940348	20	6	45906.2	0.0571521	0.213134	19	7.6	35751.8	9783.86	0.273661	14063	19460	24151	38492	36459	58970	48631	39565	36765	31600	33177	31299	38237	32487	28779	29121	33828.5
unknown228	0.0210199	0.0995561	18	9	4940.56	0.783698	1	26.6465	6.00002	25870.2	0.0841127	0.240972	22.3233	8.09409	21698.2	3535.94	0.16296	13433	13851	20678	16839	28958	30006	23383	21134	22377	23922	20742	19410	26186	22222	21484	18266	21430.7
unknown237	0.0210199	0.0995561	24	9	867.266	0.196533	0.900865	20	6	4091.75	0.0268076	0.177639	22	7.425	1932.65	1555.21	0.804704	201	1154	828	2336	1155	7134	4385	3693	2382	987	1167	643	449	1001	688	631	1802.12
unknown26	0.0210199	0.0995561	18	9	26394.2	0.638189	1	20	6	135132	0.0712506	0.228234	19	7.6	107649	25147.3	0.233603	59895	63633	80912	89437	122662	172448	132721	112699	111922	113206	85335	81227	118301	116785	97288	84826	102706
unknown294	0.0210199	0.0995561	18	9	1990.86	0.655504	1	20	6	9260.5	0.0728149	0.228348	19	7.6	7303.89	1674.66	0.229283	4038	4239	5566	6140	8765	11174	9414	7689	7901	7279	4974	5603	8250	7543	7136	5884	6974.69
unknown322	0.0210199	0.0995561	24	9	2319.49	0.100972	0.900865	20	6	12498.2	0.0151863	0.162391	22	7.425	8342.24	2989.17	0.358317	4326	6662	6509	9639	10082	16716	12357	10838	9151	7805	6741	4724	5201	7332	5361	6018	8091.38
unknown339	0.0210199	0.0995561	18	9	957.776	0.316799	0.900865	20	6	4565.25	0.0400329	0.187143	19	7.6	3233.02	1099.54	0.340097	1409	1673	1898	3188	3353	3922	4866	6120	2524	2088	2721	3298	3155	2975	2352	2728	3016.88
unknown351	0.0210199	0.0995561	24	9	1558.11	0.228669	0.900865	20	5.99998	8386.75	0.030463	0.180106	22	7.42499	5610.98	2163.19	0.385527	2856	4406	4426	5949	6366	12562	8446	6173	6948	6028	3513	3658	3547	5158	3388	3447	5429.44
unknown356	0.0210199	0.0995561	24	9	23480.5	0.176324	0.900865	20	5.99999	110265	0.0244531	0.174973	22	7.425	62588.8	35045	0.559924	20984	35715	38605	78628	64992	176551	117752	81765	68479	56990	39875	32521	30464	46290	34830	29921	59647.6
unknown383	0.0210199	0.0995561	18	9	18849.7	0.389814	0.908997	20	6	77395.5	0.0475601	0.198831	19	7.6	54349.9	20676.9	0.38044	23814	19232	36439	47750	57291	110661	75542	66088	63584	47537	41052	35156	58512	51812	42897	27198	50285.3
unknown401	0.0210199	0.0995561	24	9	4328.55	0.18419	0.900865	20	6.00002	24252	0.0253751	0.174973	22	7.42501	14788.6	7253.13	0.490454	6847	10137	9485	14108	14788	37422	26212	18586	17318	13942	10740	8206	8787	12672	9835	7793	14179.9
unknown423	0.0210199	0.0995561	18	9	2960.3	0.786541	1	27.3065	5.99999	16337.2	0.0843579	0.240972	22.6533	8.15208	13420.8	2579.19	0.192178	6109	8738	11559	10449	15911	21968	13688	13782	14694	15039	12866	11773	16665	14735	12479	11758	13263.3
unknown433	0.0210199	0.0995561	18	9	1112.28	0.308889	0.900865	20	6	6918.75	0.0391975	0.187143	19	7.6	4085.32	2217.05	0.542686	1065	1822	2167	4926	2910	11802	7984	4979	3910	2766	2510	2252	3227	2134	2060	1878	3649.5
unknown46	0.0210199	0.0995561	18	9	6219.18	0.662695	1	20	6	42437.2	0.0734618	0.22874	19	7.6	35838.7	5917.92	0.165127	24503	24139	29451	33655	36804	52066	43613	37266	36008	33543	33736	30167	39148	36872	32605	31230	34675.4
unknown460	0.0210199	0.0995561	18	9	2865.2	0.4059	0.908997	20	6	11654.2	0.0491777	0.201529	19	7.6	8309.8	2942.8	0.354136	3839	3973	5328	6440	8056	16230	12051	10280	8254	8775	5885	5435	8664	8496	6367	5628	7731.31
unknown47	0.0210199	0.0995561	18	9	3532.53	0.354825	0.900865	20	6	22332.2	0.0439926	0.193654	19	7.6	17836.4	4229.62	0.237134	11495	10016	14148	18629	18259	28481	22140	20449	19155	16013	18011	13770	18645	16410	14466	11992	17004.9
unknown478	0.0210199	0.0995561	18	9	3733.7	0.218729	0.900865	20	6.00001	21476	0.0293432	0.180106	19	7.60001	15626.4	4712.81	0.301593	8673	8310	11798	15202	17381	28337	20802	19384	14191	13533	12908	11502	16589	13836	12648	10105	14699.9
unknown492	0.0210199	0.0995561	18	9	1669.13	0.621318	1	20	6	9484	0.069717	0.225877	19	7.6	6977.03	2060.74	0.295361	3889	3529	4884	6190	6557	14384	9595	7400	6704	7058	5217	4442	6477	7175	6397	5253	6571.94
unknown497	0.0210199	0.0995561	18	6	1023.89	0.845198	1	20	6	17372.8	0.0893711	0.24374	19	6.01667	15330.1	1905.87	0.124323	14024	13918	16640	13766	14714	17057	24096	13624	9072	13664	12825	12729	17243	16336	16952	14926	15099.1
unknown532	0.0210199	0.0995561	18	9	4250.6	0.252545	0.900865	20	5.99998	36057.2	0.0331166	0.181473	19	7.59999	28767.5	5533.78	0.192362	23134	19670	25129	24692	32175	45051	36538	30465	24671	25769	26067	23435	29551	23719	29391	23418	27679.7
unknown538	0.0210199	0.0995561	24	6	1033.61	0.129611	0.900865	21.7778	6	5390.25	0.0188134	0.168352	22.8889	6.01417	3759.65	1599.67	0.425485	4533	2447	3498	3526	5399	7348	4282	4532	2999	3308	3937	3824	4038	1665	1924	1990	3703.12
unknown548	0.0210199	0.0995561	24	9	689.076	0.100252	0.900865	20	5.99999	4572	0.0150932	0.162391	22	7.425	3246.74	991.806	0.305478	2215	2918	2401	3340	3375	5834	4958	4121	3197	3287	3110	2052	2450	2976	2070	2312	3163.5
unknown549	0.0210199	0.0995561	24	12	1076.04	0.276207	0.900865	24.8451	12	7004	0.0356995	0.183249	24.4225	12.0036	5880.49	1430.56	0.243273	4297	3921	6206	3757	6411	6554	6249	6462	8974	5653	6935	6454	7391	4861	5143	5139	5900.44
unknown552	0.0210199	0.0995561	18	9	21659	0.226442	0.900865	20	6	110572	0.030213	0.180106	19	7.6	81063.3	24852.2	0.306578	44022	37826	62321	74293	90808	137632	112269	101581	82003	72333	62302	60021	85244	75895	64757	55540	76177.9
unknown59	0.0210199	0.0995561	18	9	16498.6	0.315208	0.900865	20	6	97613.5	0.0398652	0.187143	19	7.6	72135	21772.8	0.301834	40775	34791	53247	70975	73376	130513	94456	92109	76078	63190	58681	52244	75130	68307	58178	43629	67854.9
unknown6	0.0210199	0.0995561	18	9	119216	0.308185	0.900865	20	6	712214	0.0391229	0.187143	19	7.6	550844	139604	0.253436	327976	301756	438760	530020	578966	899734	724481	645673	563582	496698	469510	433078	566337	527594	472322	397931	523401
unknown602	0.0210199	0.0995561	18	9	7823.78	0.575761	0.982073	20	6.00001	37693.5	0.0655268	0.221548	19	7.6	29863.3	7334.35	0.245598	16168	14159	23668	26431	38893	45520	35931	30430	30671	28405	25088	25359	33208	32589	27391	20833	28421.5
unknown622	0.0210199	0.0995561	18	9	241.831	0.519052	0.957474	20	6	1438.5	0.0602041	0.21493	19	7.6	1090.59	304.737	0.279423	455	548	978	942	1197	1904	1438	1215	1154	801	1156	729	1174	1013	948	839	1030.69
unknown750	0.0210199	0.0995561	18	9	442.119	0.215158	0.900865	20	6	2156.25	0.0289386	0.180106	19	7.6	1581.4	524.074	0.3314	718	848	1101	1701	1539	2167	2487	2432	1252	1102	1464	1879	1258	1082	1026	1598	1478.38
unknown769	0.0210199	0.0995561	18	9	563.211	0.0677699	0.900865	20	5.99998	2379.75	0.0107607	0.150181	19	7.59999	1536.7	694.422	0.451893	469	825	1032	1701	1738	2717	2502	2562	1202	970	1268	1438	778	771	1062	1368	1400.19
unknown804	0.0210199	0.0995561	18	9	2317.19	0.386466	0.906601	27.8233	6	14112.5	0.0472217	0.198132	22.9117	8.19833	12773.3	1538.69	0.120462	9579	9586	9046	12190	13012	12400	16122	14916	12744	14663	13857	12234	14329	12375	13579	12522	12697.1
unknown822	0.0210199	0.0995561	18	9	1692.11	0.400149	0.908997	20	6	7945	0.048601	0.201529	19	7.6	5539.79	2138.37	0.386001	2599	2167	3951	4649	5010	11985	7761	7024	5929	5130	4306	3656	6249	4780	3784	2931	5119.44
unknown828	0.0210199	0.0995561	18	9	588.49	0.0841234	0.900865	20	5.99999	3015.75	0.0129751	0.158043	19	7.6	2061.59	721.537	0.349991	1036	1283	1489	1864	2548	3200	2690	3625	1908	1127	1779	1513	1735	1623	1421	1875	1919.75
unknown884	0.0210199	0.0995561	24	18	2185.31	0.124299	0.900865	28	17.9999	11104.5	0.0181516	0.168352	26	18.1071	8723.29	1019.05	0.11682	7977	6344	8397	4990	8324	7272	8001	5094	10805	9482	9759	7843	12293	13098	10446	8581	8669.12
unknown890	0.0210199	0.0995561	18	6	927.371	0.409062	0.908997	20	6.00001	4584	0.0494941	0.201728	19	6.01667	3699.27	1006.37	0.272047	2344	2604	3089	3538	3752	4892	4806	4886	3810	2918	3105	3071	3547	3811	3708	3356	3577.31
unknown893	0.0210199	0.0995561	24	9	1022.48	0.105601	0.900865	20	6	5312.25	0.015783	0.163609	22	7.425	2949.27	1651.3	0.559902	1360	2264	1908	3359	2473	7201	6050	5525	3691	2269	1750	1047	1604	2235	1007	1228	2810.69
unknown915	0.0210199	0.0995561	24	12	809.637	0.286612	0.900865	24.7059	12	4493.5	0.0368216	0.183699	24.3529	12.0025	3669.67	1006.21	0.274198	2726	1967	4097	2088	4593	4315	3405	3650	5645	3520	4621	4188	4399	3123	3069	3496	3681.38
unknown925	0.0210199	0.0995561	18	9	593.263	0.720191	1	20	6	4472.25	0.0785758	0.236815	19	7.6	3635.43	749.339	0.206121	2358	2249	3001	3266	4042	6336	4038	3473	3581	2814	3771	3187	3760	3719	3040	3175	3488.12
unknown94	0.0210199	0.0995561	18	9	2753.83	0.855415	1	20	6.00001	16377.5	0.0902354	0.24407	19	7.6	13591.9	2695.41	0.19831	7818	7754	11656	10967	16837	20921	14550	13202	14028	12903	12886	11110	16169	14943	12289	10960	13062.1
Cer d40:1	0.0254844	0.106723	18	6	246.78	0.150052	0.900865	20	6	854.25	0.0251101	0.174973	19	6.01667	591.182	280.01	0.473645	333	466	308	560	811	1055	828	723	445	481	412	407	543	428	445	671	557.25
unknown856	0.0254844	0.106723	18	9	489.495	0.2845	0.900865	20	5.99999	3448.5	0.0429705	0.192175	19	7.59999	2912.64	579.381	0.198919	2129	1702	2567	3009	3974	3636	2807	3377	3550	2703	2413	2934	2703	2525	2380	2371	2798.75
Cer 36:0;3O|Cer 16:0;2O/20:0;O	0.0299489	0.106723	18	9	2608.16	0.91998	1	20	6	12133.2	0.126511	0.278996	19	7.6	9312.46	2444.1	0.262454	3690	4358	5429	8402	10052	17223	11353	9905	9244	9002	7294	6476	8650	11440	8755	10039	8832
Cer 36:2;2O|Cer 14:2;2O/22:0	0.0299489	0.106723	18	9	21946.1	0.544117	0.964892	20	6	118882	0.0833829	0.240005	19	7.6	85592.2	27325.8	0.319256	40910	45011	55854	76148	85413	174190	124309	91616	77865	86331	65460	52992	85138	94564	70881	56847	80220.6
Cer 42:0;4O|Cer 18:0;3O/24:0;(2OH)	0.0299489	0.106723	18	6	466.867	0.122647	0.900865	20	6	1389.5	0.0242674	0.174973	19	6.01667	942.62	472.913	0.501701	499	682	609	828	1286	1289	1520	1463	598	537	834	713	710	675	729	1193	885.312
Cer 43:0;3O|Cer 18:0;3O/25:0	0.0299489	0.106723	18	6	351.255	0.54455	0.964892	20	6	1307.75	0.0834362	0.240005	19	6.01666	1007.98	331.958	0.329331	617	776	708	937	1480	1309	1219	1223	807	659	996	749	828	941	840	1395	967.75
DG 36:2	0.0299489	0.106723	18	9	1146.22	0.19523	0.900865	20	5.99999	8357	0.035911	0.183249	19	7.59999	5751.99	2071.31	0.360103	3086	3155	4560	5628	5263	11732	9751	6682	5133	4624	5047	3763	4762	4646	3808	3877	5344.81
DG 38:5	0.0299489	0.106723	18	9	127.279	0.225126	0.900865	20	6	619	0.0404493	0.187143	19	7.6	457.144	160.658	0.351438	225	216	300	527	584	410	777	705	475	371	515	379	249	264	397	415	425.562
FA 12:0 (lauric acid)	0.0299489	0.106723	24	15	63959.9	0.226697	0.900865	28	17.9999	223692	0.0406845	0.187165	26	16.4821	179434	20875.1	0.116338	103244	115493	113553	90324	272414	163458	110261	143464	260782	189855	253215	167201	284015	242863	205730	162162	179877
FA 20:4 (arachidonic acid)	0.0299489	0.106723	18	6	141.068	0.625459	1	20	6	626	0.0932383	0.247716	19	6.01667	319.621	317.164	0.992312	118	116	85	283	265	1455	423	361	212	111	139	162	185	172	173	239	281.188
NAPhe 14:0	0.0299489	0.106723	18	9	14682	0.629366	1	26.3284	5.99999	58668.8	0.0937033	0.248071	22.1642	8.06655	50277.8	10312.9	0.205118	33355	35459	38433	32660	82442	48249	42756	61228	48779	41160	69343	58560	46030	41981	52844	57535	49425.9
PC 28:2|PC 14:1_14:1	0.0299489	0.106723	18	9	3453.16	0.225426	0.900865	20	5.99998	16490.2	0.0404942	0.187143	19	7.59999	10310.9	4876.86	0.472983	5812	4524	5114	8202	9089	24055	18606	14211	9630	9061	5121	6208	11031	7659	6787	4525	9352.19
PC 30:2	0.0299489	0.106723	18	9	35337.3	0.693353	1	20	6	162757	0.101219	0.258356	19	7.6	122254	39056	0.319465	71674	54987	85586	91867	119099	248940	155380	127609	149999	119120	99672	80319	147335	120825	99453	61363	114577
PC 32:2	0.0299489	0.106723	18	9	945058	0.368473	0.904531	20	6	5.23638e+06	0.0607679	0.21493	19	7.6	3.98432e+06	1.10512e+06	0.277367	2292880	1892875	3003840	4071384	4026529	6629351	5319224	4970419	4344090	3625659	3326030	2930581	4269454	3822804	3288975	2459110	3.76708e+06
PC 36:1	0.0299489	0.106723	18	9	236306	0.410567	0.908997	20	6	1.01967e+06	0.0663799	0.222867	19	7.6	665200	296832	0.44623	238252	218153	382455	560612	606714	1613502	1017325	841132	643533	559196	461685	415046	636830	683665	462513	368983	606850
PC 36:4 Isomer A	0.0299489	0.106723	18	9	537687	0.688388	1	26.6465	5.99999	3061765	0.100643	0.258221	22.3233	8.09408	2.57028e+06	446016	0.173528	1629088	1616804	2324834	1985808	3483866	3519899	2905901	2337394	2863334	2698994	2543240	2302518	3018090	2749695	2547479	2057614	2.53653e+06
PC 36:5 Isomer A	0.0299489	0.106723	18	9	598.389	0.599013	1	20	6	3716	0.090071	0.243957	19	7.6	3008.65	581.979	0.193435	1620	2434	2114	2836	4304	4024	3531	3005	2884	2822	2514	2470	3410	3137	2696	2507	2894.25
PEtOH 36:3|PEtOH 18:1_18:2	0.0299489	0.106723	24	18	1513.92	0.496434	0.951746	28	17.9999	7040.99	0.0774392	0.235517	26	18.1071	5553.29	110.084	0.0198232	3964	4952	4750	3019	8846	3939	3921	3373	6496	5428	6071	5836	7708	7967	6456	6033	5547.44
PI 32:1	0.0299489	0.106723	18	9	11251.8	0.667939	1	20	6	68090.8	0.0982564	0.255603	19	7.6	56608.5	10503.8	0.185552	38803	40415	43111	48162	75603	80579	53192	62989	59058	58076	51231	42055	63404	56811	54964	44246	54543.7
TG 44:1	0.0299489	0.106723	24	9	220119	0.217807	0.900865	20	6.00002	1.09807e+06	0.0393499	0.187143	22	7.42501	674038	327384	0.485705	281470	420222	462995	734223	719272	1768475	1113856	790682	792596	628970	484611	409816	401113	542905	445934	347852	646562
TG 44:3|TG 12:0_14:1_18:2	0.0299489	0.106723	24	9	11559.1	0.244293	0.900865	20	6	59866.2	0.0432955	0.192602	22	7.425	30855.2	23822.2	0.772064	12060	14002	13660	26216	15033	102726	64835	56871	49143	26245	21572	9423	13933	17050	11294	7632	28855.9
TG 46:3 Isomer A	0.0299489	0.106723	24	9	51327.1	0.152727	0.900865	20	6	230428	0.0292159	0.180106	22	7.425	104419	89848	0.860459	29142	40407	39515	118315	58310	383070	258219	222115	118621	65813	53135	24727	34682	48046	29194	26739	96878.1
TG 48:4 Isomer A	0.0299489	0.106723	24	9	17757.6	0.135734	0.900865	20	6	90637.2	0.0264447	0.177219	22	7.425	40480.3	36291.4	0.896518	10020	14374	15815	41567	20770	144842	109136	87801	39705	31427	20746	11051	14398	15923	10856	10522	37434.6
TG 50:2	0.0299489	0.106723	24	9	94280.1	0.203468	0.900865	20	6	514334	0.0371744	0.183939	22	7.425	298072	150778	0.505844	111856	246429	201966	326608	335915	849415	521523	350483	340408	254953	183712	127012	146993	243051	161812	164556	285418
TG 52:3	0.0299489	0.106723	24	9	30735.5	0.103527	0.900865	20	6	152186	0.0210098	0.168352	22	7.425	82554.7	50668.2	0.613753	32126	57647	47884	82117	84812	230123	164253	129555	96578	71075	49885	32790	41172	58332	37151	37338	78302.4
TG 53:4	0.0299489	0.106723	24	9	276.125	0.414417	0.911102	20.2759	6	1524.5	0.0668865	0.22412	22.1379	7.42637	982.383	400.869	0.408058	575	812	669	1288	1037	2765	1210	1086	1041	976	918	473	598	649	587	532	951
TG 60:5	0.0299489	0.106723	18	9	302.995	0.288338	0.900865	20	6	1144.75	0.0496698	0.201728	19	7.6	765.109	323.266	0.422509	182	299	249	776	1081	1125	1099	1274	466	469	653	842	768	530	662	750	701.562
unknown1008	0.0299489	0.106723	18	9	2330.09	0.0591298	0.900865	20	5.99998	9107.5	0.0129916	0.158043	19	7.59999	5310.93	3006.38	0.566075	1239	1282	3235	4527	8172	11049	8990	8219	3684	2561	3594	4545	2933	3109	3979	4401	4719.94
unknown102	0.0299489	0.106723	18	9	3856.91	0.801376	1	27.6489	5.99998	22196.2	0.113514	0.270243	22.8245	8.18264	18321.5	3217.43	0.17561	10076	11300	15368	14950	21511	29246	20550	17478	19327	19188	18390	16341	20696	21485	18550	15938	18149.6
unknown1039	0.0299489	0.106723	18	6	1176.27	0.847567	1	20	5.99998	6867	0.118635	0.273777	19	6.01666	5567.52	1490.72	0.267753	3685	4318	3639	5597	6645	9202	6325	5296	5260	4354	4655	4456	5771	6088	5141	5758	5386.88
unknown1060	0.0299489	0.106723	18	9	1221.88	0.560667	0.974375	20	6	6403	0.085416	0.24304	19	7.6	5070.62	1210.37	0.238703	2947	2576	4810	3641	6566	7887	6200	4959	5203	4551	4647	4005	5350	5559	4157	4265	4832.69
unknown108	0.0299489	0.106723	18	9	3532.88	0.853125	1	20	6	29440.8	0.119246	0.274009	19	7.6	25786.3	3110.18	0.120613	18713	19479	22910	22805	27125	33907	28270	28461	26388	23858	23497	22382	29897	26240	24469	24398	25174.9
unknown1083	0.0299489	0.106723	18	6	1624.93	0.74371	1	20	6	6853.75	0.107009	0.263706	19	6.01667	4356.62	2681.42	0.615482	2262	1734	2575	3719	4052	11609	6489	5265	2312	2256	2281	3542	2441	3017	7801	3152	4031.69
unknown1103	0.0299489	0.106723	18	9	5341.13	0.101613	0.900865	20	6.00001	21591.5	0.0206781	0.168352	19	7.60001	13831.9	6535.83	0.47252	6052	6575	9382	12073	16730	27414	22390	19832	16094	12756	10874	4540	8437	13220	9386	4998	12547.1
unknown1117	0.0299489	0.106723	18	9	651.069	0.893003	1	20	6	4213.25	0.123598	0.276096	19	7.6	3539.98	622.098	0.175735	2367	2830	2591	3102	3692	5767	4100	3294	3636	3285	4053	2292	4030	3490	3161	2993	3417.69
unknown1122	0.0299489	0.106723	18	9	804.157	0.455025	0.926663	20	5.99998	8964.75	0.0721667	0.228324	19	7.59999	7340.92	1288.2	0.175482	5126	6434	5717	7390	8113	12243	7908	7595	7048	6453	6950	5993	7702	6454	5764	6513	7087.69
unknown1128	0.0299489	0.106723	18	6	2295.98	0.198643	0.900865	20	6.00001	5272	0.0364355	0.183249	19	6.01667	3071.12	2174.94	0.708191	1204	1526	1296	4746	2412	7703	5633	5340	2056	1765	1625	1499	2100	2342	1836	1838	2807.56
unknown1157	0.0299489	0.106723	18	6	32153.9	0.21631	0.900865	20	6.00001	73217.2	0.0391241	0.187143	19	6.01667	44112.1	28799.2	0.652864	19142	22445	19182	68441	35479	103934	79865	73591	30284	26678	24871	22328	32525	35137	27659	28395	40622.2
unknown1176	0.0299489	0.106723	18	6	1263.78	0.975748	1	20	6	5839.5	0.132461	0.285388	19	6.01667	4697.14	1408.66	0.299897	1573	2735	4277	4489	4569	6854	5384	6551	4353	3845	3831	4168	6608	4474	4758	3954	4526.44
unknown1187	0.0299489	0.106723	18	6	1107.33	0.580134	0.982653	20	6	5936	0.0877886	0.24356	19	6.01667	4700.8	1306.34	0.277898	3081	4414	3000	5073	5324	8028	5684	4708	4126	4627	3526	3134	4633	4549	4230	4543	4542.5
unknown1194	0.0299489	0.106723	18	6	1049.35	0.810872	1	20	5.99998	4379	0.114573	0.270269	19	6.01666	3435.83	1086.35	0.316182	2249	1780	2175	3824	3462	5424	4383	4247	2889	2909	2517	2840	3076	4090	3371	3631	3304.19
unknown1215	0.0299489	0.106723	18	9	1677.43	0.157368	0.900865	20	6	17476	0.0299627	0.180106	19	7.6	12584.6	3502.84	0.278343	7639	8887	8184	14919	13344	23248	16303	17009	10426	10035	9540	9692	11611	10200	9476	9824	11896.1
unknown124	0.0299489	0.106723	18	9	6631.25	0.674069	1	20	6	37862.8	0.0989737	0.255708	19	7.6	29524.4	7340.57	0.248627	15171	15359	23936	25134	33451	50411	35883	31706	30426	26811	24643	23073	33984	33207	25510	20598	28081.4
unknown1240	0.0299489	0.106723	18	9	1898.05	0.736034	1	20	6	9324.25	0.106133	0.263572	19	7.6	7494.7	1744.28	0.232735	3574	3551	5446	8285	7464	11116	9916	8801	8686	6638	5590	6955	7738	8423	5926	6320	7151.81
unknown125	0.0299489	0.106723	18	9	4255.02	0.73155	1	20	6.00002	22800.2	0.105621	0.26259	19	7.60001	19191	3634.31	0.189376	13390	10641	16621	15126	22481	27746	21227	19747	19844	21336	16809	15290	21651	20239	17709	15768	18476.6
unknown1268	0.0299489	0.106723	18	6	22019.7	0.431665	0.916833	20	5.99999	131686	0.0691432	0.225293	19	6.01666	104595	31024.8	0.296618	66919	82919	78270	89477	148933	156027	122361	99425	92291	99123	88644	85285	110435	104617	93046	95593	100835
unknown1289	0.0299489	0.106723	18	6	15213	0.352966	0.900865	20	5.99999	60644.5	0.058665	0.213999	19	6.01666	44628.8	17456.6	0.391151	26429	28171	27212	48610	51341	81050	56768	53419	39147	36330	34519	31556	44313	45455	36294	39601	42513.4
unknown1301	0.0299489	0.106723	24	6	1284.11	0.214196	0.900865	24.1644	6	10730.5	0.0388049	0.187143	24.0822	6.00007	8806.22	2122.49	0.241022	9380	8055	9010	7820	11342	11627	10280	9673	7789	7778	11616	9330	10078	5286	6103	5824	8811.94
unknown1349	0.0299489	0.106723	18	6	1840.78	0.571457	0.978688	20	6	7265.25	0.0867335	0.243487	19	6.01667	4485.42	2946.44	0.656892	1766	1391	2808	4619	3893	12195	7817	5156	2569	2523	2177	3132	3224	2751	6080	3953	4128.38
unknown1371	0.0299489	0.106723	18	9	11113.6	0.168837	0.900865	20	6	65725.8	0.0317906	0.180547	19	7.6	36145.7	21052.1	0.582424	12408	11817	15587	59320	20977	86277	79413	76236	26335	17162	22579	17474	25025	13910	14710	12887	32007.3
unknown1386	0.0299489	0.106723	18	9	514.951	0.471559	0.934611	20	6	4237.75	0.074285	0.230664	19	7.6	3357.5	659.718	0.196491	2204	2534	2369	3501	3905	5449	4009	3588	3215	2691	3043	2571	3676	3610	2663	2617	3227.81
unknown1442	0.0299489	0.106723	18	9	843.578	0.102903	0.900865	20	5.99999	3646	0.0209017	0.168352	19	7.6	2117.27	1181.24	0.55791	675	625	937	2207	2598	3375	3736	4875	1147	803	1893	1747	1203	1097	1149	2094	1885.06
unknown1451	0.0299489	0.106723	18	9	670.691	0.158423	0.900865	20	6	6792.25	0.0301318	0.180106	19	7.6	4791.31	1452.03	0.303055	2872	3190	3190	5508	4994	9384	6263	6528	3943	3749	3682	3563	4398	3702	3370	3758	4505.88
unknown1457	0.0299489	0.106723	18	6	5798.28	0.312801	0.900865	20	6	22640.2	0.0531211	0.208447	19	6.01666	16240.4	6912.41	0.425631	9395	9812	9742	17717	19307	31201	20577	19476	13879	12491	12271	11778	15858	16386	12875	13679	15402.8
unknown1461	0.0299489	0.106723	18	9	810.875	0.610482	1	20	6	4703	0.0914487	0.245442	19	7.6	3655.5	873.041	0.23883	2042	2280	2629	3160	4998	6151	3822	3841	3742	2974	3084	2903	4168	3806	3182	2960	3483.88
unknown1475	0.0299489	0.106723	18	6	1086.12	0.296866	0.900865	20	5.99999	4502	0.0508798	0.204338	19	6.01666	3352.51	1300.8	0.388009	1516	2035	2598	3234	3835	5462	4474	4237	3057	2706	2581	3012	3275	3615	2415	3066	3194.88
unknown1478	0.0299489	0.106723	24	9	1549.98	0.305757	0.900865	27.4766	12	11916.2	0.0521335	0.20772	25.7383	10.4463	10286.6	2378.85	0.231257	11026	12101	11998	9204	14189	13039	9208	11178	11298	12468	12843	11056	10650	3821	7729	5590	10462.4
unknown1488	0.0299489	0.106723	18	12	1094.6	0.344486	0.900865	24.1644	12	8751.25	0.0575065	0.213392	21.0822	12.2621	7280.73	2157.8	0.296372	4951	5896	8534	5734	8714	7855	6593	8847	10761	7295	8795	8154	7526	3059	6473	4677	7116.5
unknown1496	0.0299489	0.106723	18	9	461.918	0.104677	0.900865	20	6	2472.5	0.0212085	0.168352	19	7.6	1378.57	799.029	0.579607	485	365	663	1745	1427	2549	2309	3605	851	598	1022	801	815	609	757	943	1221.5
unknown151	0.0299489	0.106723	18	9	4474.57	0.382095	0.906601	20	6	15868.2	0.062599	0.215955	19	7.6	11269.8	4061.63	0.360399	4787	4230	7845	8805	17819	18948	17212	9494	11454	9889	8429	8551	11768	11537	9400	7374	10471.4
unknown1530	0.0299489	0.106723	18	9	1286.23	0.138166	0.900865	20	5.99999	5335	0.0268451	0.177639	19	7.59999	3063.25	1764.87	0.576145	916	939	1280	2904	3721	4305	5486	7828	1604	1145	2856	2384	1725	1651	1783	2934	2716.31
unknown1532	0.0299489	0.106723	24	15	17529.9	0.179962	0.900865	25.7143	12	87364.2	0.0335414	0.181473	24.8571	13.5679	73449.6	13882	0.189	50971	63745	72009	42667	93461	63200	54511	57956	91483	70688	92233	95053	81087	84238	77914	87506	73670.1
unknown1547	0.0299489	0.106723	18	9	219.026	0.165836	0.900865	20	6	1150.25	0.0313146	0.180547	19	7.6	691.105	340.092	0.4921	248	328	333	718	833	929	1174	1665	384	267	627	536	336	390	435	785	624.25
unknown155	0.0299489	0.106723	18	9	8059.96	0.286623	0.900865	20	6.00001	40172.2	0.0494257	0.201728	19	7.60001	26431.6	11376.6	0.430417	10817	9399	17612	23748	25474	59435	41086	34694	27449	20278	19335	16276	25878	25568	16856	13218	24195.2
unknown1557	0.0299489	0.106723	18	6	3487.8	0.0869625	0.900865	20	6.00001	9340.75	0.0181022	0.168352	19	6.01667	5739.01	3545.95	0.617867	2937	3043	3680	7729	5974	9412	10971	11006	2550	2913	4354	4364	4705	3858	3334	4119	5309.31
unknown156	0.0299489	0.106723	18	9	3556.04	0.322596	0.900865	20	5.99999	31121.2	0.0544866	0.209595	19	7.6	24714.7	4811.03	0.194663	16160	16441	19053	29600	24712	35685	33071	31017	23419	21128	20711	20411	25779	23420	19965	19731	23768.9
unknown1586	0.0299489	0.106723	18	9	3111.98	0.77085	1	28	5.99999	12765	0.110087	0.265761	23	8.21428	10102.1	1884.29	0.186524	4691	5411	7180	8149	13393	13705	11628	12334	10475	8009	11064	9045	10514	11634	12356	10674	10016.4
unknown1590	0.0299489	0.106723	24	6	1773.6	0.307952	0.900865	28	5.78e-05	5719.75	0.0524417	0.208006	26	3.25003	3871.88	326.35	0.0842873	7685	3272	7731	4191	3843	7913	4432	2816	3033	2666	4427	3231	3226	575	1808	1186	3877.19
unknown1601	0.0299489	0.106723	18	9	906.864	0.164828	0.900865	20	5.99999	4319.5	0.0311543	0.180547	19	7.6	2511.19	1394.17	0.555183	693	884	1189	2569	2818	3626	4309	6525	1350	975	2078	2226	1331	1135	1525	2561	2237.12
unknown1603	0.0299489	0.106723	18	9	2135.99	0.449378	0.926663	20	6	7400.5	0.0714392	0.228275	19	7.6	4630.39	2395.78	0.517402	1328	1271	3255	1352	9491	4077	6076	9958	2383	2034	5455	4311	3159	2602	4367	5432	4159.44
unknown1643	0.0299489	0.106723	18	9	856.483	0.452832	0.926663	20	6	5460.25	0.0718844	0.228275	19	7.6	4100.95	1162.47	0.283463	2946	2726	3243	3031	3704	8313	4554	5270	3961	4320	3201	2943	3527	4108	3421	2691	3872.44
unknown165	0.0299489	0.106723	24	9	1325.29	0.196171	0.900865	20	6	8805	0.0360558	0.183249	22	7.425	4781.89	2811.45	0.587936	2571	3648	2579	4980	3688	15176	9560	6796	4628	3698	3178	2390	2681	2419	2936	1807	4545.94
unknown1651	0.0299489	0.106723	18	9	1479.8	0.169194	0.900865	20	6.00002	5941.75	0.031847	0.180547	19	7.60001	3783.61	1724.73	0.455842	1098	1751	2550	2787	3619	7504	6659	5985	2731	3226	3141	2088	3458	3664	2512	2340	3444.56
unknown1653	0.0299489	0.106723	18	6	690.843	0.1264	0.900865	20	6	1796.25	0.0248959	0.174973	19	6.01667	1051.35	782.228	0.744021	357	449	550	1077	1415	1518	1720	2532	510	387	952	940	613	570	563	1152	956.562
unknown1658	0.0299489	0.106723	18	6	1093.89	0.138766	0.900865	20	5.99999	2819	0.0269436	0.177639	19	6.01666	1646.74	1235.67	0.750374	490	661	860	1731	2121	2494	2603	4058	832	649	1521	1416	871	911	958	1776	1497
unknown167	0.0299489	0.106723	18	9	14765.6	0.267566	0.900865	20	6.00002	76761.2	0.0466908	0.197403	19	7.60001	52682.5	19264.1	0.365664	25459	20922	33399	57935	51084	105064	80072	70825	51058	42201	38022	36533	50475	48938	38999	31343	48895.6
unknown1673	0.0299489	0.106723	24	6	1334.66	0.213213	0.900865	28	5.62e-05	4864	0.0386561	0.187032	26	3.25003	3807.67	735.223	0.19309	6767	3470	5170	4049	6297	5396	3367	4017	3761	3135	3971	3846	3570	597	2503	1198	3819.62
unknown1679	0.0299489	0.106723	18	9	1370.9	0.526556	0.962637	20	6	5108.75	0.0812091	0.238219	19	7.6	3572.24	1328.64	0.371933	1369	1146	2242	3579	4337	5994	5349	4755	4702	3057	2360	1833	4454	4075	2536	1189	3311.06
unknown1692	0.0299489	0.106723	18	9	578.237	0.142455	0.900865	20	5.99999	2719	0.0275479	0.177639	19	7.59999	1871.82	646.115	0.34518	970	1286	1101	1581	3358	2201	2541	2776	1201	1259	1799	1504	1476	1415	1326	2123	1744.81
unknown1728	0.0299489	0.106723	18	9	3571.42	0.670393	1	20	6.00001	27673.8	0.0985438	0.255708	19	7.60001	20492	5942.73	0.290003	16653	13824	4427	24322	24406	38931	21141	26217	21718	21322	21062	6214	17637	20021	17024	14261	19323.8
unknown1729	0.0299489	0.106723	18	9	1365.78	0.124648	0.900865	20	5.99998	6198	0.024603	0.174973	19	7.59999	4086.99	1818.24	0.444885	2255	1119	3343	3499	5326	8732	5009	5725	3250	2664	4625	2999	3552	2867	1921	2787	3729.56
unknown1730	0.0299489	0.106723	18	9	2417.95	0.593959	0.995103	20	5.99999	8153.5	0.0894617	0.24374	19	7.6	5944.08	2338.24	0.393373	1348	1061	3953	6100	7291	9904	5465	9954	7695	5921	4755	4393	8276	4281	3594	3760	5484.44
unknown19	0.0299489	0.106723	24	9	9420.78	0.163217	0.900865	20	6	45968.8	0.0308979	0.180106	22	7.425	27982.9	13004.4	0.464728	10418	21785	19350	33348	34122	68633	47315	33805	32019	26812	21671	10459	13996	24005	16411	16115	26891.5
unknown215	0.0299489	0.106723	18	9	1160.01	0.426783	0.916342	20	6	9460.75	0.0685066	0.224687	19	7.6	7851.1	1486.26	0.189305	5041	6091	6273	8172	8147	12192	9581	7923	8265	7812	7647	5974	7050	7310	7569	5896	7558.94
unknown23	0.0299489	0.106723	18	9	2832.32	0.35581	0.900865	20	6.00001	16427	0.0590523	0.214518	19	7.60001	11931.2	3670.68	0.307654	6161	5881	8214	12323	12105	22305	16743	14555	11822	10001	9609	8457	12633	11677	9107	7761	11209.6
unknown240	0.0299489	0.106723	18	9	7508.59	0.761263	1	26.4865	6.00002	27532	0.109003	0.265085	22.2432	8.08021	21327	5452.02	0.255639	10080	10355	17888	13757	33803	32118	26129	18078	25846	22671	20308	16895	26303	25184	20517	14395	20895.4
unknown258	0.0299489	0.106723	18	6	2635.03	0.455473	0.926663	20	5.99998	10530	0.0722244	0.228324	19	6.01666	7311.39	3588.3	0.490782	3400	3817	4854	6479	7531	14966	11030	8593	6087	7143	4596	4567	7489	8030	5495	5948	6876.56
unknown278	0.0299489	0.106723	18	9	39975.6	0.840711	1	27.1385	6.00001	179062	0.117879	0.273648	22.5692	8.13721	144526	28161.9	0.194858	86652	88587	113347	107774	180509	233137	167011	135589	163027	168266	126129	114557	167922	171491	140517	118698	142701
unknown28	0.0299489	0.106723	18	9	58453.3	0.706177	1	26.6465	5.99999	331146	0.102704	0.259296	22.3233	8.09408	278801	46794.9	0.167843	180148	176783	252171	216987	376335	377899	315342	255007	313079	289864	275912	245718	322743	299457	280171	226560	275261
unknown321	0.0299489	0.106723	24	9	5329.46	0.220755	0.900865	20	6.00001	24266.5	0.0397936	0.187143	22	7.42501	15046.2	7319.52	0.486471	6375	9259	10097	16902	15646	37969	25710	17741	19152	15210	10363	8487	9209	12153	8958	7679	14431.9
unknown33	0.0299489	0.106723	24	9	1005.86	0.312074	0.900865	20	5.99998	9016	0.0530194	0.208447	22	7.42499	7138.8	1485.49	0.208087	5650	6075	6230	7526	7551	12440	8035	8038	8077	6823	6587	5689	6541	7059	5433	4472	7014.12
unknown344	0.0299489	0.106723	18	9	4757.41	0.870105	1	20	5.99999	22183	0.121105	0.275358	19	7.6	18330.3	3943.91	0.215158	10290	11533	14318	12819	23155	28871	19898	16808	19836	20502	15509	13768	21397	20390	16360	15426	17555
unknown345	0.0299489	0.106723	18	9	9664.03	0.78368	1	20	5.99999	52742.2	0.111532	0.267795	19	7.59999	44277.7	8530.27	0.192654	26965	26443	40420	31766	57654	63888	47281	42146	44282	45963	39580	38655	49688	45798	43427	37658	42600.9
unknown348	0.0299489	0.106723	18	9	3248.45	0.873445	1	20	6	13772.8	0.12147	0.275455	19	7.6	11239.8	2621.13	0.233202	6050	6393	8305	8208	11992	18989	13210	10900	11743	13214	9508	8255	12862	12987	9845	9131	10724.5
unknown35	0.0299489	0.106723	18	9	47771.8	0.293019	0.900865	20	6.00001	290640	0.0503349	0.203241	19	7.60001	212130	62843.3	0.296249	114553	112142	153462	214215	219546	385005	300656	257352	199995	183150	168847	153279	216221	211434	162512	144047	199776
unknown366	0.0299489	0.106723	24	9	10131.2	0.15764	0.900865	20	6	48063.5	0.0300062	0.180106	22	7.425	33941.4	12189.6	0.359137	15190	26341	26192	39640	39486	60644	53910	38214	43812	34831	31162	21521	22615	27863	24740	20533	32918.4
unknown377	0.0299489	0.106723	24	9	5671.7	0.254568	0.900865	20	6.00001	28742.2	0.0448023	0.193798	22	7.42501	18409.1	8174.64	0.444053	8492	12280	13177	18311	20307	45369	28419	20874	23052	18155	13802	10382	11159	17500	12292	9998	17723.1
unknown404	0.0299489	0.106723	18	9	1908.13	0.452433	0.926663	20	6.00001	7281.5	0.0718331	0.228275	19	7.6	5495.17	1701.19	0.30958	2986	2632	3623	4738	6379	8965	7023	6759	6569	5556	4156	3826	6840	5569	4212	2739	5160.75
unknown406	0.0299489	0.106723	24	9	19187.3	0.341787	0.900865	20	6	84637.5	0.0571365	0.213134	22	7.425	50631	28832.3	0.56946	17771	28386	29419	56756	46017	151287	79833	61413	72470	50368	34948	30354	34989	35188	26943	15237	48211.2
unknown407	0.0299489	0.106723	18	9	2029.04	0.619086	1	20	6	10660.8	0.0924781	0.247159	19	7.6	8237.77	2137.63	0.259492	3993	4876	6064	6967	8212	13969	11559	8903	8964	8077	6109	6043	8625	8803	7175	6742	7817.56
unknown422	0.0299489	0.106723	24	9	1943.13	0.21952	0.900865	20	6	8582.25	0.0396079	0.187143	22	7.425	4516.75	3030.23	0.670888	1978	2726	1981	5325	3290	14775	8771	7493	6135	3712	2617	1469	1724	3100	1563	1540	4262.44
unknown426	0.0299489	0.106723	24	6	902.799	0.148121	0.900865	20.6557	6	4801.5	0.0284705	0.17954	22.3279	6.03384	3305.58	1442.67	0.436434	2041	3005	2669	4211	3201	5907	5435	4663	4146	3318	2597	1731	1819	2721	2284	1933	3230.06
unknown436	0.0299489	0.106723	18	6	2947.57	0.363417	0.900865	20	6.00002	11880.8	0.0600845	0.21493	19	6.01667	8170.36	4142.95	0.50707	3730	4063	5120	7484	8245	16755	12435	10088	7365	6424	5903	5933	7809	8944	5940	6455	7668.31
unknown437	0.0299489	0.106723	18	9	3599.17	0.180555	0.900865	20	6.00002	17526.5	0.0336341	0.181473	19	7.60001	11672	4948.18	0.423935	5657	7095	7737	10522	12199	26104	18788	13015	13590	9606	8130	7210	7682	9954	7966	5934	10699.3
unknown446	0.0299489	0.106723	24	18	821.658	0.140661	0.900865	26.8085	17.9999	4034.75	0.0272545	0.177639	25.4043	18.0551	3391.2	191.217	0.0563861	1799	2914	3545	2730	3911	2868	2614	2173	3795	3948	4256	3446	4057	4217	4173	3692	3383.62
unknown451	0.0299489	0.106723	24	9	11470	0.20004	0.900865	20	5.99998	53770.2	0.0366499	0.183249	22	7.42499	32041.9	16822.7	0.525021	11037	21103	20561	35336	36714	85714	56794	35859	38641	30889	24175	15394	17078	24579	19570	16636	30630
unknown458	0.0299489	0.106723	24	9	1417.4	0.147329	0.900865	20	6	9857.75	0.028342	0.179233	22	7.425	5350.34	3172.05	0.592868	2926	2576	3136	5682	4025	15378	10791	9237	5435	3643	3502	2948	3759	3361	2629	2318	5084.12
unknown472	0.0299489	0.106723	18	9	2119.91	0.487754	0.940729	20	6.00001	12277.5	0.0763429	0.234139	19	7.60001	8925.5	2673.56	0.299542	5147	3615	6364	9179	9225	17310	11383	11192	9499	6968	7149	5784	9667	9290	6878	5749	8399.94
unknown51	0.0299489	0.106723	18	9	88723.2	0.351799	0.900865	20	6	510812	0.0585059	0.213999	19	7.6	377214	114565	0.303714	210774	175440	278171	382591	372784	690040	501793	478631	403590	332758	308914	266044	393123	356454	303864	220124	354693
unknown510	0.0299489	0.106723	24	9	19778.8	0.166784	0.900865	20	5.99999	89994.8	0.0314651	0.180547	22	7.42499	53431.7	27901	0.522181	18310	36724	35600	62166	65171	139433	94744	60631	64152	51430	39800	24519	26596	41867	29067	27231	51090.1
unknown55	0.0299489	0.106723	18	9	5264.59	0.242098	0.900865	20	6	34588	0.0429718	0.192175	19	7.6	20214.8	10783.4	0.533444	7273	7382	9232	27247	14800	54838	39365	29349	19533	12283	9960	11572	13163	14257	10550	8716	18095
unknown57	0.0299489	0.106723	18	9	1332.01	0.624808	1	20	6.00001	8064.25	0.0931608	0.247716	19	7.60001	6766.85	1285.63	0.18999	4187	4248	5547	6145	6933	9060	8821	7443	7673	5885	6554	5692	7872	6762	6047	5357	6514.12
unknown577	0.0299489	0.106723	24	9	1803.48	0.0931525	0.900865	24.1644	6	7049.5	0.0191989	0.168352	24.0822	7.50521	5832.91	1697.62	0.291041	4384	4308	6673	4473	8109	7945	6217	5927	7412	5521	8113	6647	4681	4225	4730	4057	5838.88
unknown588	0.0299489	0.106723	18	6	1533.71	0.160361	0.900865	20	6	6646	0.030442	0.180106	19	6.01667	4430.18	2302.85	0.519809	2316	2812	2935	4581	4326	9046	6921	6291	3579	3242	3055	2751	4144	3528	3678	3213	4151.12
unknown605	0.0299489	0.106723	18	9	2095.33	0.847451	1	20	6	11628.8	0.118622	0.273777	19	7.6	9446.45	2019.92	0.213829	5178	5844	6819	8135	10877	15611	11003	9024	9258	9801	8216	7371	10735	10458	9318	7142	9049.38
unknown61	0.0299489	0.106723	24	9	19966.2	0.0940097	0.900865	20	6	96448.8	0.0193498	0.168352	22	7.425	52609.8	31406.9	0.596977	19572	38313	31149	51778	56613	141528	105938	81716	60623	43530	31845	20875	26059	39676	25475	24894	49974
unknown615	0.0299489	0.106723	18	9	537.401	0.520993	0.957474	20	6	4392	0.0805168	0.238219	19	7.6	3314.79	818.241	0.246846	2348	2094	1835	4628	2828	6296	4507	3937	3246	2880	2744	2369	2776	2543	2734	2698	3153.94
unknown624	0.0299489	0.106723	24	15	1303.2	0.224476	0.900865	26.6465	12	5152.5	0.040352	0.187143	25.3233	13.6156	4189.26	895.948	0.213868	2504	4102	3509	1895	6070	3695	2538	2506	4699	5445	5141	5325	5304	4559	5242	4851	4211.56
unknown642	0.0299489	0.106723	18	9	6738.37	0.589172	0.991522	20	6	35036.8	0.0888835	0.24374	19	7.6	23858.7	10148.2	0.425346	11443	14277	14400	19375	20327	64186	31766	23868	31658	22488	16334	12906	19541	21096	14358	11797	21863.8
unknown665	0.0299489	0.106723	18	6	3891.21	0.909744	1	20	5.99999	16085	0.125409	0.277348	19	6.01666	10880.5	5916.13	0.543738	5698	3439	7659	7273	12810	25994	15283	10253	8553	7304	4932	8133	7757	8166	19686	9677	10163.6
unknown695	0.0299489	0.106723	18	9	3924.8	0.240252	0.900865	20	5.99998	22830.5	0.0426992	0.192104	19	7.59999	15264.7	6210.97	0.406883	7944	6513	10636	16651	11150	33347	24736	22089	15495	12046	11884	10039	11871	10930	10903	8467	14043.8
unknown714	0.0299489	0.106723	24	15	1208.8	0.460756	0.931889	22.6735	12	7322.75	0.0729029	0.228348	23.3368	13.4682	5855.72	1845.95	0.315239	4124	4685	5889	3562	9067	5684	4513	3703	7387	6661	8289	6954	5871	6371	4596	6008	5835.25
unknown727	0.0299489	0.106723	18	9	1586.39	0.521651	0.957474	20	6	9084.5	0.0805988	0.238219	19	7.6	6806.87	1846.55	0.271277	3901	3632	4815	6650	6692	12328	9199	8119	6919	6587	5452	4087	6204	8001	5567	4949	6443.88
unknown731	0.0299489	0.106723	18	9	2399.92	0.162924	0.900865	20	6	8007.25	0.0308512	0.180106	19	7.6	5335.82	2362.65	0.442791	1837	1693	3737	4014	7069	7470	8970	8520	3518	2829	5451	5909	3779	3259	3671	6216	4871.38
unknown742	0.0299489	0.106723	18	6	4358.96	0.768956	1	20	6	19519.2	0.109873	0.265761	19	6.01667	12925.2	7176.2	0.555208	7141	4639	8887	10739	13707	32215	19036	13119	9392	8159	5444	9432	8090	10071	20470	12349	12055.6
unknown794	0.0299489	0.106723	18	9	2760.54	0.0989595	0.900865	20	5.99998	11888.8	0.0202165	0.168352	19	7.59999	7331.37	3614.01	0.492952	2783	2839	3967	6957	8293	11646	11997	15619	4348	3685	6715	6462	4514	5156	4481	6473	6620.94
unknown836	0.0299489	0.106723	18	9	2108.59	0.0712882	0.900865	20	6.00002	7437.75	0.0152638	0.162391	19	7.60001	4365.38	2609.33	0.597734	1897	1794	2484	3458	4630	9834	8674	6613	5612	3034	2831	1881	1938	2946	1955	2058	3852.44
unknown840	0.0299489	0.106723	18	9	1320.88	0.156251	0.900865	20	6.00001	7581.75	0.0297832	0.180106	19	7.60001	5307.07	1942.34	0.36599	3573	2989	3528	4690	5244	10406	8210	6467	5411	5381	3177	4150	4495	4076	4311	2696	4925.25
unknown894	0.0299489	0.106723	18	9	646.649	0.875542	1	20	6	3338.5	0.121699	0.275695	19	7.6	2540.12	701.051	0.275991	1656	1019	1804	1684	3017	5078	3046	2213	2499	2378	2092	1852	2857	2651	2801	1790	2402.31
unknown939	0.0299489	0.106723	18	9	718.067	0.442105	0.923279	20	6	4054.25	0.070499	0.227074	19	7.6	3076	855.579	0.278146	1906	1478	2263	2899	2820	5514	4305	3578	2551	2824	3173	2342	2512	2641	3349	2370	2907.81
unknown942	0.0299489	0.106723	18	9	1341.03	0.204583	0.900865	20	6.00001	6734.5	0.0373447	0.183939	19	7.60001	4594.09	1792.03	0.390073	1969	2022	3568	4462	5342	5689	7585	8322	2607	2285	5138	5111	2936	2776	3167	4890	4241.81
unknown989	0.0299489	0.106723	24	15	9576.7	0.322866	0.900865	26.0177	12	36480.2	0.0545241	0.209595	25.0088	13.5826	28294.2	8733.49	0.308667	21585	22827	20513	9593	35565	35295	18409	14378	44542	40021	37612	23746	35819	41354	27119	26957	28458.4
CE 18:2	0.0359573	0.119106	24	9	102.53	0.204074	0.900865	23.52	6	359.5	0.0434018	0.192602	23.76	7.48561	221.851	131.821	0.594187	325	0	148	241	260	532	423	223	224	261	249	268	108	111	0	155	220.5
unknown682	0.0359573	0.119106	18	9	722.31	0.543952	0.964892	20	6	3956.5	0.0965104	0.251937	19	7.6	3180.43	828.185	0.260401	2081	2134	2516	2923	3254	5983	4073	2516	4011	3027	3192	2383	2385	2788	2663	2353	3017.62
CAR 16:0	0.0419656	0.119106	18	6	5031.77	0.192062	0.900865	20	6	14662.8	0.046916	0.19761	19	6.01667	9214.1	5651.48	0.613352	4217	2836	4946	12621	9894	18893	12709	17155	5535	5991	7397	5973	6832	6161	7431	7877	8529.25
Cer 28:0;2O|Cer 16:0;2O/12:0	0.0419656	0.119106	24	18	1246.81	0.124355	0.900865	27.6489	17.9999	3840.25	0.0326454	0.181473	25.8245	18.0903	2758.58	351.085	0.12727	2001	1816	2159	872	3781	1941	1119	962	3538	2575	4462	3273	4739	3670	3254	3698	2741.25
Cer 36:0;3O|Cer 14:0;2O/22:0;(2OH)	0.0419656	0.119106	18	6	4208.35	0.798697	1	20	6	16853.2	0.147333	0.297839	19	6.01667	12574.8	4730.1	0.376156	6382	8381	6263	15104	12863	24636	15375	14539	10263	9727	9748	8272	11262	14759	12185	12267	12001.6
Cer 36:1;3O|Cer 16:1;2O/20:0;O	0.0419656	0.119106	18	9	4027.33	0.232216	0.900865	20	6	32506.5	0.0548745	0.210032	19	7.6	16989.5	10833.3	0.637646	4951	4809	6468	21428	10182	54917	37481	27446	9462	9206	7499	6901	9203	12193	7168	8444	14859.9
Cer 37:1;3O|Cer 16:1;2O/21:0;(2OH)	0.0419656	0.119106	18	6	870.979	0.880943	1	20	5.99998	4436.75	0.158882	0.307756	19	6.01666	3598.58	979.562	0.272208	2423	2606	2452	3400	4315	5717	4290	3425	3505	2772	3091	2643	3629	4208	3371	3831	3479.88
Cer 40:2;3O	0.0419656	0.119106	24	18	3096.77	0.711297	1	28	17.9999	9659.49	0.13467	0.285976	26	18.1071	7284.92	534.563	0.0733794	5167	5904	6897	1914	14803	4024	2380	2154	9721	7978	8946	7578	10521	10810	8735	8572	7256.5
Cer d38:1	0.0419656	0.119106	18	9	2836.21	0.327943	0.900865	20	5.99999	15599	0.0727451	0.228348	19	7.59999	10311.5	3993.05	0.387242	4407	4785	6193	10364	10177	23295	16815	12109	8940	8445	6337	6580	8279	10532	8052	7115	9526.56
LPE-N (FA)36:4|LPE-N (FA 20:3)16:1	0.0419656	0.119106	18	9	17550	0.931794	1	20	6.00001	126193	0.165859	0.31267	19	7.6	110010	15339.9	0.139441	71935	96728	86920	91417	155719	138240	114047	96765	117009	96744	107383	96911	116154	122727	106751	96458	106994
PC 26:1|PC 12:0_14:1	0.0419656	0.119106	18	9	5834.69	0.619222	1	20	6	29002.5	0.12084	0.275138	19	7.6	21000.1	6897.39	0.328445	12865	9962	12524	19078	18017	43542	29812	24639	24403	20945	13781	12861	23927	19929	17662	10361	19644.2
PC 32:0	0.0419656	0.119106	18	9	25516.3	0.202951	0.900865	20	5.99999	130098	0.0491063	0.201529	19	7.6	82539.8	35719.4	0.432753	32698	30009	49296	92842	80453	176160	150743	113035	73712	59756	49991	50009	76487	72194	55357	45548	75518.1
PC 34:1	0.0419656	0.119106	18	9	817515	0.250058	0.900865	20	6.00002	3.85543e+06	0.0583138	0.213999	19	7.60001	2.61878e+06	992310	0.378921	1197460	1013712	1657599	2794210	2567010	5234596	4110069	3510026	2524425	2082196	1857634	1813395	2552795	2360524	1941491	1562263	2.42371e+06
PC 38:4 Isomer A	0.0419656	0.119106	18	9	4449.82	0.577735	0.982073	20	6	31337.8	0.114425	0.270269	19	7.6	26270.4	4559.63	0.173565	16825	17480	22741	25429	29265	37557	32803	25726	26827	25251	23542	22328	28361	25539	25399	20912	25374.1
PE 25:1;O|PE 10:0_15:1;O	0.0419656	0.119106	18	6	121.622	0.982799	1	20	6	580.75	0.172739	0.318129	19	6.01667	434.226	155.047	0.357065	254	254	331	473	425	992	480	426	235	270	223	357	307	293	779	548	415.438
PE 34:1|PE 16:0_18:1	0.0419656	0.119106	18	9	366193	0.313631	0.900865	20	6.00001	2145324	0.0701578	0.226625	19	7.60001	1.59393e+06	449641	0.282095	854296	858299	1168864	1624497	1611212	2767074	2232182	1970828	1525270	1374172	1299448	1209306	1651098	1594183	1232552	1115406	1.50554e+06
PI 34:1	0.0419656	0.119106	18	9	34598.4	0.125699	0.900865	20	6	278582	0.0329414	0.181473	19	7.6	178676	69656.2	0.389847	87717	97364	98560	234298	180986	366886	277995	288460	131810	118208	133202	105833	150079	137035	128784	102507	164983
PI 36:2	0.0419656	0.119106	18	9	56705	0.168587	0.900865	20	6	455818	0.0421039	0.190571	19	7.6	315304	100032	0.317254	172821	180914	201867	393067	329185	593974	476252	423859	258261	236726	246822	208415	284822	279409	237029	206822	295640
PI 37:2|PI 19:0_18:2	0.0419656	0.119106	18	9	1202.44	0.740474	1	20	6	6232.75	0.138945	0.290452	19	7.6	4954.12	1181.74	0.238538	2560	3029	4007	3443	7435	7768	4441	5287	5060	4160	4754	4022	5128	5307	4679	4469	4721.81
PS 38:1|PS 20:0_18:1	0.0419656	0.119106	18	9	6517.4	0.16937	0.900865	20	6	44939.5	0.0422666	0.190923	19	7.6	25917.6	13745.2	0.530343	9373	10283	13524	39305	16707	61466	53099	48486	19536	13200	18072	14616	19381	11550	12364	10488	23215.6
TG 44:2	0.0419656	0.119106	24	9	88772.3	0.237993	0.900865	20	6	443006	0.0559942	0.211272	22	7.425	232653	154396	0.663631	95865	128641	113657	258425	170205	784759	447682	369376	291361	185698	134929	85997	120544	147493	99475	81023	219696
TG 46:1	0.0419656	0.119106	24	9	246155	0.235531	0.900865	20	6.00002	1230665	0.0555177	0.210664	22	7.42501	753482	376632	0.499856	284213	498818	498891	855356	841021	1985592	1292277	803770	942600	725499	574619	400528	413333	590400	459738	383304	721872
TG 48:2	0.0419656	0.119106	24	9	208641	0.19168	0.900865	20	6	997877	0.0468387	0.19761	22	7.425	560751	317550	0.566295	189075	386689	343108	652854	640993	1664978	1013662	671875	632813	497880	386359	224064	241003	428975	289097	282174	534100
TG 48:3	0.0419656	0.119106	24	9	81678.3	0.112232	0.900865	20	6	421379	0.0299458	0.180106	22	7.425	211059	146660	0.694875	64918	116273	104607	260155	183981	640148	480746	380641	217282	157309	125786	65496	71913	142904	80577	87270	198750
TG 48:5	0.0419656	0.119106	18	9	2540.28	0.129081	0.900865	20	6.00001	8695.5	0.0336838	0.181473	19	7.60001	4622.06	3520.84	0.761746	966	1395	2000	3484	2269	12080	11210	9223	4665	4731	2528	1489	1739	1797	1633	1670	3929.94
TG 50:1	0.0419656	0.119106	24	9	31666.4	0.302265	0.900865	20	6	187520	0.0680835	0.224673	22	7.425	114475	52462	0.458282	50925	91579	80742	122664	125526	325655	174418	124481	126544	105847	82977	54728	68899	94437	74603	57136	110073
TG 50:5	0.0419656	0.119106	24	9	5482.2	0.156412	0.900865	20	5.99999	24101.2	0.0395552	0.187143	22	7.42499	12319.8	8911.58	0.723355	4658	4805	5814	14718	7885	37288	28837	22395	13678	11982	7764	4486	6110	6491	4572	3667	11571.9
TG 51:3	0.0419656	0.119106	24	9	724.431	0.160451	0.900865	20	5.99999	4198.25	0.040405	0.187143	22	7.42499	2871.53	1022.81	0.35619	1884	2514	2102	2808	2643	5497	4795	3858	3406	3055	1772	2099	1697	2849	1893	1699	2785.69
TG 58:2	0.0419656	0.119106	18	9	4801.26	0.0903584	0.900865	20	5.99998	23076.8	0.0249316	0.174973	19	7.59999	15492.8	6194.15	0.39981	7608	9224	10944	14254	17509	30139	22651	22008	17959	11489	12040	8513	10817	12910	10670	9667	14275.1
TG 58:8	0.0419656	0.119106	18	9	109.602	0.745882	1	20	6.00001	513.5	0.139732	0.291542	19	7.6	400.885	109.739	0.273741	329	160	238	392	422	600	394	638	220	360	381	546	358	502	195	334	379.312
TG 64:2	0.0419656	0.119106	18	9	451.488	0.135824	0.900865	20	6.00002	3058.5	0.0351533	0.183249	19	7.60001	2296.56	615.213	0.267884	1253	1542	2199	2013	2570	3813	3139	2712	2129	2306	1815	1646	1907	2057	1961	1748	2175.62
unknown100	0.0419656	0.119106	24	9	43293.3	0.115084	0.900865	20	6	225234	0.0305856	0.180106	22	7.425	115575	76643.2	0.663145	35411	67259	60739	141117	103675	341507	252072	203683	118915	91625	71947	35520	42331	80786	48119	51584	109143
unknown1036	0.0419656	0.119106	24	9	627.557	0.230887	0.900865	20	5.99999	4410	0.0546161	0.209595	22	7.42499	2943.99	1075.99	0.365487	1352	2900	2038	2674	3407	6845	4005	3383	2843	2804	2475	1963	2196	2424	2132	2218	2853.69
unknown1081	0.0419656	0.119106	18	9	5187.34	0.860114	1	20	6.00002	34366.5	0.155989	0.306936	19	7.60001	29739.5	4662.24	0.156769	19951	23772	23748	24620	37296	42211	31096	26863	33661	27564	26868	26427	31728	34364	27055	23944	28823
unknown1089	0.0419656	0.119106	18	9	2259.21	0.51863	0.957474	20	6	9160.25	0.105068	0.261907	19	7.6	6103.2	2788.39	0.456873	3018	1233	3454	5418	5180	15020	9561	6880	8068	3666	4939	4213	6223	5700	4024	2284	5555.06
unknown109	0.0419656	0.119106	18	9	42156.8	0.730086	1	20	6	246142	0.137429	0.288884	19	7.6	190457	46629.7	0.244831	99779	98402	147335	168418	214530	336586	225575	207879	193247	169257	156866	140175	217649	213988	174707	136257	181291
unknown1096	0.0419656	0.119106	18	9	814.941	0.436025	0.919132	20	6	4983	0.0915078	0.245442	19	7.6	3513.13	1294.37	0.368437	1455	1569	2370	4326	3057	7766	5280	3829	3632	2910	3413	2323	2549	3200	2487	1973	3258.69
unknown111	0.0419656	0.119106	18	9	2865.55	0.864101	1	20	6	16345	0.156544	0.306936	19	7.6	13335.5	2690.82	0.20178	7346	8319	10356	11529	14612	21446	15793	13529	14192	13415	10949	9910	14597	15307	13110	10494	12806.5
unknown1133	0.0419656	0.119106	18	9	584.07	0.20877	0.900865	20	5.99999	2818	0.0502666	0.203241	19	7.59999	1960.51	669.613	0.341551	982	1301	1207	1955	2931	2244	2550	3547	1389	1054	2179	1623	1262	1235	1439	2364	1828.88
unknown1156	0.0419656	0.119106	18	9	1138.8	0.691699	1	20	6	6680.75	0.131771	0.284448	19	7.6	5402.88	1094.08	0.202498	3221	2671	4338	5769	7132	6017	7097	6477	5880	3873	4475	5219	6559	4861	4329	5087	5187.81
unknown1172	0.0419656	0.119106	18	6	3066.37	0.107862	0.900865	20	6	8944.75	0.0289596	0.180106	19	6.01667	5579.27	3424.29	0.613752	2599	3175	2806	6989	6453	9117	11183	9026	3199	4839	3482	2650	4696	5170	3765	3480	5164.31
unknown1179	0.0419656	0.119106	18	6	81698.4	0.211546	0.900865	20	6.00001	191841	0.0508177	0.204338	19	6.01667	117086	73813.5	0.630419	54128	61156	54528	179585	94675	270666	211356	190667	82008	73164	66817	61956	86028	93831	73629	76074	108142
unknown1246	0.0419656	0.119106	18	6	39538.8	0.185203	0.900865	20	6	145374	0.0455231	0.195135	19	6.01667	101226	45504.7	0.449538	55015	69252	66030	118041	118988	200436	136700	125371	78726	79227	74087	66956	94014	92477	77785	78275	95711.2
unknown128	0.0419656	0.119106	18	9	3182.16	0.198577	0.900865	24.0327	6	21086.5	0.0482295	0.200882	21.0163	7.87756	18791	3332.44	0.177342	14760	13207	20077	14321	19693	24289	19743	20621	23494	18070	19311	21125	19610	13585	17286	14516	18356.8
unknown1282	0.0419656	0.119106	18	9	9237.29	0.128953	0.900865	20	6	45514.5	0.0336557	0.181473	19	7.6	24991.8	15315	0.612801	5276	7336	11294	26923	32494	34151	45999	69414	11335	8572	19452	19287	11613	11198	14849	22507	21981.2
unknown1318	0.0419656	0.119106	18	6	2783	0.662778	1	20	5.99999	10444.8	0.127449	0.279691	19	6.01666	6510.58	4320.66	0.663637	1923	2771	2928	6133	6740	18690	9350	6999	5112	3801	4889	3051	6463	7911	4970	4061	5987
unknown1323	0.0419656	0.119106	18	9	637.103	0.678671	1	20	6	7285	0.129831	0.282432	19	7.6	6356.26	805.085	0.12666	4985	5390	5476	6161	7066	9412	6693	5969	6146	5882	6630	5409	6827	5582	5762	5778	6198
unknown1328	0.0419656	0.119106	18	6	5430.58	0.317238	0.900865	20	6	17184.2	0.0708125	0.227756	19	6.01667	11826.3	5449.61	0.460803	5891	7509	6547	16545	11644	23971	16762	16360	9634	8334	8733	7025	10327	11476	8850	9047	11165.9
unknown1379	0.0419656	0.119106	18	6	897.319	0.26625	0.900865	20	5.99999	4470.5	0.0613888	0.21493	19	6.01666	3496.68	1051.59	0.30074	2200	2773	2586	3697	4215	5609	3786	4272	3445	2769	3179	2694	3598	3292	2810	2983	3369.25
unknown1416	0.0419656	0.119106	18	6	2145.01	0.855257	1	20	6.00002	9595	0.155311	0.306936	19	6.01668	7726.9	2148.87	0.278103	5076	3775	8544	6276	9793	10976	8578	9033	6506	4231	7338	8224	7715	6278	8195	8926	7466.5
unknown1432	0.0419656	0.119106	18	9	2471.34	0.522026	0.957474	20	6	11272.5	0.105613	0.26259	19	7.6	8643.69	2609.99	0.301953	4430	3502	5742	10008	9877	13812	12946	8455	10111	6554	8216	7866	10765	7537	4789	5480	8130.62
unknown1458	0.0419656	0.119106	18	9	54145.5	0.764068	1	20	6	407826	0.142367	0.295119	19	7.6	335823	60763.3	0.180938	221460	264561	255961	272028	513627	469848	351383	296447	314877	310772	309839	276867	353457	362916	302388	305623	323878
unknown1459	0.0419656	0.119106	18	9	7545.89	0.787924	1	20	6	50453.8	0.145795	0.297347	19	7.6	41179.8	7859.33	0.190854	25807	31533	31026	32543	63605	58326	43541	36343	38506	37842	37642	33785	43826	45673	36934	37225	39634.8
unknown1463	0.0419656	0.119106	24	18	3041.09	0.409874	0.908997	23.9024	17.9999	7896.5	0.0870834	0.243487	23.9512	18	5591.63	1362.66	0.243696	5185	4923	5661	984	9392	1653	1069	996	9603	5951	6764	5734	8752	9506	5908	7420	5593.81
unknown1479	0.0419656	0.119106	24	15	3516.8	0.501287	0.953179	27.3065	12	13051.8	0.10227	0.258557	25.6533	13.6534	10093.7	3786.67	0.37515	4481	4412	7291	4115	20397	11970	5843	7173	16350	10459	16161	9237	14178	13142	10122	8067	10212.4
unknown1544	0.0419656	0.119106	18	9	1197.49	0.709431	1	27.3065	6.00002	5366.5	0.134395	0.285976	22.6533	8.1521	4505.65	837.657	0.185913	2929	2623	3619	3376	6368	6519	4037	4542	4958	3734	5996	3964	4697	4404	5177	4329	4454.5
unknown1624	0.0419656	0.119106	18	6	4285.24	0.0657892	0.900865	20	6	10085.8	0.0190286	0.168352	19	6.01667	4941.83	4927.75	0.99715	1530	1904	1670	8534	7713	10929	7392	14309	1296	1737	1637	1995	2460	1118	2340	2951	4344.69
unknown1649	0.0419656	0.119106	18	9	922.421	0.440069	0.921599	20	6	4273.75	0.0921859	0.246672	19	7.6	3065.6	1177.84	0.384212	1343	1744	1767	3303	4563	6788	3548	2196	3650	2733	3116	1972	1712	2678	2006	2226	2834.06
unknown1650	0.0419656	0.119106	18	9	1865.52	0.931917	1	20	6	8178.5	0.165875	0.31267	19	7.6	6035.26	1827.23	0.302759	2502	2581	3755	3899	8834	11546	6395	5939	6341	5400	4743	3535	8304	7571	5502	3970	5676.06
unknown1652	0.0419656	0.119106	24	6	1338.2	0.247633	0.900865	28	5.99997	4356.25	0.0578496	0.213999	26	6.0357	3317.27	617.903	0.186269	6241	3240	3733	4055	5766	5539	2810	3310	2844	2955	2783	3025	3448	545	2282	1173	3359.31
unknown1676	0.0419656	0.119106	24	6	4149.66	0.165673	0.900865	28	5.92e-05	15649.5	0.0414975	0.188969	26	3.25003	11545.8	170.809	0.014794	18962	12979	18497	12160	14209	16983	11010	11384	10520	9931	13458	11857	10214	1592	6985	3948	11543.1
unknown1688	0.0419656	0.119106	18	9	391.03	0.95419	1	20	5.99999	2305	0.168894	0.31414	19	7.6	1948.2	363.468	0.186566	1395	1287	1319	1648	2247	3261	1829	1883	2246	1723	1902	1591	2398	2215	1514	1570	1876.75
unknown1690	0.0419656	0.119106	24	18	3861.16	0.225279	0.900865	25.5652	17.9999	10355.5	0.053522	0.208447	24.7826	18.0179	7657.61	938.12	0.122508	4770	4580	8325	2655	11314	3971	3928	2099	11148	10166	10219	7571	11799	12831	8448	8344	7635.5
unknown1718	0.0419656	0.119106	18	6	3145.74	0.509109	0.957474	20	6	10645.8	0.103535	0.260334	19	6.01667	7272.69	3564.48	0.490118	4305	5321	4730	5987	12387	9900	14343	5953	4948	4148	8970	2059	8111	4665	7154	6471	6840.75
unknown175	0.0419656	0.119106	18	9	26110.6	0.330536	0.900865	20	6.00002	132263	0.0732111	0.228594	19	7.60001	84580.2	38671.6	0.457218	33753	26725	48929	88773	71173	205271	130702	121907	89933	63157	57645	47192	83985	70314	55961	36231	76978.2
unknown184	0.0419656	0.119106	18	9	5028.24	0.691433	1	27.3065	5.99999	25427	0.131731	0.284448	22.6533	8.15208	21475	3579.94	0.166702	14299	12883	19648	15995	28219	30713	21889	20887	23128	23698	20634	19865	25711	22077	22054	18403	21256.4
unknown187	0.0419656	0.119106	18	9	3703.65	0.380372	0.906601	20	6	30352.8	0.0820078	0.238391	19	7.6	25493.5	4364.15	0.171187	18841	18118	21411	26978	23206	36093	33219	28893	27053	22846	24259	22030	24613	25023	21545	20041	24635.6
unknown195	0.0419656	0.119106	24	9	100646	0.181333	0.900865	20	6	484380	0.0447326	0.193798	22	7.425	265066	156945	0.592099	91210	156834	146683	345651	251057	793360	514084	379018	289250	229653	164317	111989	118654	189259	127626	121657	251894
unknown207	0.0419656	0.119106	18	9	1091.42	0.22378	0.900865	20	6.00002	5575.25	0.0532285	0.208447	19	7.60001	3755.56	1475.25	0.392817	1479	1524	1909	4946	3834	6040	5676	6751	3045	2510	3854	2582	1823	3212	3419	2845	3465.56
unknown211	0.0419656	0.119106	18	9	3873.18	0.184265	0.900865	20	6	20770.2	0.0453319	0.194962	19	7.6	11899.9	6538.79	0.549484	3869	3638	5165	13498	10644	31429	22034	18974	9033	7897	6051	6159	8193	11156	5836	6256	10614.5
unknown214	0.0419656	0.119106	24	9	1725.34	0.26214	0.900865	20.0911	6	7594.75	0.0606124	0.21493	22.0456	7.42538	4332.15	2354.28	0.543445	1341	3235	2607	6598	3979	13018	7071	6311	4939	4281	2708	1798	1405	3170	1782	1980	4138.94
unknown220	0.0419656	0.119106	18	6	1781.91	0.0686661	0.900865	20	6	6162	0.0197373	0.168352	19	6.01667	3675.86	2537.92	0.690428	1540	2031	2413	3696	4285	8225	6363	5775	2164	2177	2525	2308	3155	1911	2706	2619	3368.31
unknown232	0.0419656	0.119106	24	18	848.882	0.406568	0.908997	20.0911	12	9645.75	0.0865192	0.243487	22.0456	14.8508	8952.13	1405.7	0.157024	8991	9392	8270	8632	7818	8514	8181	6961	10593	9557	9370	9063	10342	11124	9144	7480	8964.5
unknown245	0.0419656	0.119106	24	12	4858.88	0.185634	0.900865	24.1644	12	31141	0.0456109	0.195135	24.0822	12.0001	27528.8	5767.2	0.209497	24419	20656	28913	19574	31691	35398	28977	27565	30422	28448	34665	31029	29938	20420	26305	22290	27544.4
unknown257	0.0419656	0.119106	24	9	41261.8	0.272807	0.900865	20	6	211546	0.0626222	0.215955	22	7.425	113759	71817.3	0.631311	47908	66094	59971	127791	84495	381947	211648	168092	140384	94932	68896	43255	60138	76766	49539	41852	107732
unknown284	0.0419656	0.119106	18	9	19731.8	0.430605	0.916833	20	6.00002	132430	0.0905963	0.244716	19	7.60001	100498	25183.7	0.25059	63390	60801	79271	96001	94226	175782	136861	122853	105948	81552	84340	69471	115817	93510	79572	69361	95547.2
unknown295	0.0419656	0.119106	18	9	1203.5	0.149342	0.900865	20	6	6963.75	0.0380573	0.185568	19	7.6	4697.61	1780.41	0.379004	2361	3455	2956	5140	5317	10052	6988	5498	4837	4294	3288	2546	3034	3616	3818	2362	4347.62
unknown297	0.0419656	0.119106	18	9	3544.73	0.597447	0.998711	20	6	16987.2	0.117488	0.273648	19	7.6	12637.5	4069.78	0.322041	7950	6465	9061	9519	12168	25854	16774	13153	15225	12881	9303	8501	14459	11975	10237	5874	11837.4
unknown329	0.0419656	0.119106	18	9	1249.81	0.877545	1	20	6	6293.25	0.158411	0.307593	19	7.6	5180.8	1156.3	0.223189	3083	2619	4378	3786	5701	8677	5611	5184	5563	5761	4530	3959	6414	5420	4810	3760	4953.5
unknown340	0.0419656	0.119106	18	9	7078.14	0.774515	1	20	6	42257.5	0.143872	0.295738	19	7.6	30753.8	9527.51	0.3098	13705	13006	20789	30690	25185	67073	37053	39719	25769	30269	23191	23333	34153	34707	22150	21302	28880.9
unknown354	0.0419656	0.119106	18	6	3129.65	0.141991	0.900865	20	6	9571.5	0.0364846	0.183249	19	6.01667	5681.05	3820.67	0.672529	3319	3361	3165	6625	8667	12970	10862	5787	3578	1461	3191	2677	6855	2861	5051	3059	5218.06
unknown382	0.0419656	0.119106	18	9	1246.98	0.610753	1	20	6	7321.75	0.11954	0.274302	19	7.6	5859.98	1288.19	0.219828	4012	3506	3635	5989	5835	9110	7629	6713	6246	5616	5280	4102	6627	5948	4997	4463	5606.75
unknown402	0.0419656	0.119106	18	9	3929.57	0.240678	0.900865	20	5.99998	21124.5	0.0565126	0.212514	19	7.59999	13860.9	5685.61	0.410192	5763	6131	8245	13921	12878	30234	22059	19327	11240	12756	9071	8704	12389	12824	9307	9042	12743.2
unknown412	0.0419656	0.119106	18	9	1653.92	0.79448	1	20	6	9399.5	0.146732	0.297573	19	7.6	7529.8	1637.96	0.21753	4288	4365	6157	6407	9213	12497	8498	7390	7350	7266	6702	5739	8695	8902	6125	5731	7207.81
unknown413	0.0419656	0.119106	18	9	102483	0.412583	0.909065	20	6	450482	0.0875448	0.24356	19	7.6	298377	126773	0.424875	111290	102092	170781	260002	274079	684531	459031	384289	293715	253829	202126	188450	295993	315021	209716	170355	273456
unknown42	0.0419656	0.119106	18	9	26508	0.612846	1	20	6	177318	0.119862	0.274302	19	7.6	144697	28669.7	0.198137	93856	89649	117166	131992	159770	225800	175754	147947	148326	136551	127601	115541	159354	152947	127739	114982	139061
unknown420	0.0419656	0.119106	24	9	2588.72	0.171901	0.900865	20	6	17203.5	0.0427913	0.192133	22	7.425	10513.9	4617.94	0.439224	4226	8994	8382	9846	12052	26230	17375	13157	11752	9389	7047	4544	5936	9731	6750	6610	10126.3
unknown438	0.0419656	0.119106	24	9	1304.26	0.128557	0.900865	20	5.99999	6342.75	0.0335691	0.181473	22	7.42499	3932.22	1825.61	0.464271	1719	2708	2488	4529	3697	8126	7110	6438	5039	3261	3079	1990	2415	3287	1911	2667	3779
unknown439	0.0419656	0.119106	18	9	1995.81	0.55073	0.969382	20	6.00002	11381.2	0.110183	0.265761	19	7.60001	9586.05	1880.55	0.196176	6085	5799	7979	9746	9251	13780	11689	10805	11201	10527	7965	7796	10221	8689	8349	7580	9216.38
unknown440	0.0419656	0.119106	18	9	374.59	0.501294	0.953179	27.8233	6	4874.5	0.102271	0.258557	22.9117	8.19833	4690.29	244.647	0.0521604	3967	4201	4454	4386	4853	4756	5300	4589	4992	4517	4783	4982	5246	4552	4748	4525	4678.19
unknown447	0.0419656	0.119106	18	9	2681.17	0.202128	0.900865	20	5.99999	13399	0.0489414	0.201529	19	7.59999	7747.6	4633.23	0.598021	2816	3814	3920	7178	5749	22567	13746	11534	8619	6589	4074	3261	4064	5244	3229	2985	6836.81
unknown543	0.0419656	0.119106	18	9	2279.01	0.934625	1	28	5.99999	10252.2	0.166243	0.312746	23	8.21428	8058.52	1593.42	0.197731	4215	4635	6213	5748	10698	13902	8926	7483	9524	8104	7177	6226	9963	10094	8064	6804	7986
unknown580	0.0419656	0.119106	24	9	353.2	0.266394	0.900865	20	5.99999	2406.25	0.0614159	0.21493	22	7.42499	1534.8	654.424	0.426391	1067	778	1087	1628	1659	3955	2425	1586	939	1260	1545	1501	1007	1005	1104	1132	1479.88
unknown596	0.0419656	0.119106	24	9	12830.1	0.137868	0.900865	20	5.99999	60213.8	0.0355958	0.183249	22	7.425	33621.4	19448.7	0.578462	11611	17606	19966	39519	36950	93888	60849	49168	35152	30433	23336	15186	14670	27383	18207	17903	31989.2
unknown610	0.0419656	0.119106	24	15	464.569	0.403327	0.908997	26.3284	12	3983	0.0859649	0.243351	25.1642	13.5985	3536.63	575.665	0.162772	2935	2826	3383	2417	4751	4089	3142	2725	4138	3724	4096	3974	3933	3688	3457	3509	3549.19
unknown611	0.0419656	0.119106	18	6	1242.39	0.26275	0.900865	20	6	5459.5	0.0607278	0.21493	19	6.01667	4334.63	1097.55	0.253205	2826	3969	3485	5360	4239	6061	5599	5939	3250	3606	3699	3427	4883	3741	3749	3393	4201.62
unknown630	0.0419656	0.119106	18	9	10613.7	0.539339	0.964892	20	6	50208.5	0.108377	0.26504	19	7.6	34432.5	13930.4	0.404571	15078	10937	20138	33647	28743	80102	47257	44732	40242	30086	25949	20155	36905	31831	25457	15847	31694.1
unknown680	0.0419656	0.119106	18	9	960.605	0.618784	1	20	6	4881.5	0.120773	0.275138	19	7.6	3244.24	1395.69	0.430206	1059	853	1911	3510	2481	7939	4599	4507	4002	2476	2262	1762	3776	3034	2240	1107	2969.88
unknown69	0.0419656	0.119106	24	9	2636.98	0.249683	0.900865	20	6	16881	0.0582421	0.213999	22	7.425	12988.5	3396.17	0.261475	7415	10552	10781	14706	14474	22120	17492	13438	15651	12843	12699	9681	9894	11787	10727	8996	12703.5
unknown706	0.0419656	0.119106	24	9	3223.17	0.227487	0.900865	20	5.99999	16118.5	0.0539535	0.20956	22	7.42499	9665.12	4898.61	0.506834	3747	8130	5884	9614	10536	26396	16078	11464	11760	9153	7298	4232	4974	8538	5656	4604	9254
unknown735	0.0419656	0.119106	18	9	4516.29	0.770732	1	26.3284	6.00002	26153	0.143328	0.295738	22.1642	8.06656	22007.9	3583.38	0.162823	14409	14122	20417	17485	28961	30443	24876	20332	23573	23213	21358	19720	25740	23069	22489	17183	21711.9
unknown757	0.0419656	0.119106	24	9	619.956	0.23619	0.900865	20	5.99999	7535.5	0.0556453	0.210664	22	7.42499	6200.13	1021.1	0.16469	5546	4857	6195	6159	7039	9598	7636	5869	6317	5842	6118	5328	5817	5724	5358	4428	6114.44
unknown760	0.0419656	0.119106	18	9	1021.24	0.518908	0.957474	20	6	5685.75	0.105113	0.261907	19	7.6	4474.92	1041.15	0.232663	2506	2680	3443	4073	4220	7324	5689	5510	4125	4301	3802	3678	4596	4385	4433	3559	4270.25
unknown787	0.0419656	0.119106	24	6	719.835	0.221109	0.900865	20	6	5065.5	0.0527047	0.208313	22	6.05	2829.85	2096.32	0.74079	1637	1954	1679	3129	2153	8749	4831	4529	2885	1963	1485	1592	1794	1964	1492	1361	2699.81
unknown79	0.0419656	0.119106	18	9	31678.9	0.848963	1	20	5.99999	163617	0.154431	0.306478	19	7.6	135221	27842	0.205901	78833	77798	114486	106245	161644	209988	156995	125840	150870	136126	118592	103037	157156	152708	118708	106934	129748
unknown813	0.0419656	0.119106	24	9	4461.14	0.155809	0.900865	20	5.99999	29544	0.0394279	0.187143	22	7.425	16694.4	9295.54	0.556806	8264	10937	10514	15150	15550	47010	32782	22834	18425	13771	10396	8862	10244	11491	9264	9134	15914.2
unknown820	0.0419656	0.119106	18	9	451.311	0.255437	0.900865	20	6	3180.5	0.0593402	0.21493	19	7.6	2635.54	492.066	0.186704	2093	1769	2169	2667	2809	3479	2741	3693	2974	2166	2299	2477	2573	2328	1964	2420	2538.81
unknown830	0.0419656	0.119106	18	9	849.589	0.817284	1	20	6	3278	0.149973	0.300647	19	7.6	2403	833.616	0.346907	1346	907	1801	1096	3017	5078	2876	2141	2807	2363	1434	1973	2857	2651	2467	1012	2239.12
unknown85	0.0419656	0.119106	18	9	36632.6	0.797319	1	20	6.00001	191532	0.147137	0.297839	19	7.6	162581	30628.9	0.188392	97530	100191	146841	121723	214756	229878	169184	152310	163439	181230	145270	139172	185906	163666	156228	137630	156560
unknown892	0.0419656	0.119106	24	9	13845.7	0.210258	0.900865	20	5.99997	71247.2	0.0505622	0.203792	22	7.42499	40651.7	22773.8	0.560217	15065	28459	25001	35227	41734	117127	72155	53973	50101	34237	25579	19472	22903	38327	21132	19354	38740.4
unknown920	0.0419656	0.119106	24	9	17214.9	0.123376	0.900865	20	6	97458.2	0.0324293	0.181473	22	7.425	45105.7	37327.4	0.827554	12005	20344	21276	45164	27064	141456	122087	99226	56348	23614	24354	11176	15032	28863	12579	10980	41973
unknown937	0.0419656	0.119106	24	9	1629.35	0.374667	0.906507	24.4321	6	17822	0.0810154	0.238219	24.2161	7.51398	14377	2735.59	0.190275	12880	13124	17970	14551	14682	25453	15897	15256	15447	15557	13731	12865	14041	7541	12814	8628	14402.3
unknown95	0.0419656	0.119106	24	9	2977.45	0.141735	0.900865	20	5.99999	15552.2	0.0364297	0.183249	22	7.425	8559.34	5080.66	0.593582	3977	4720	5040	8403	8236	24199	16698	13076	9822	7760	5526	2910	4515	6464	4811	3970	8132.94
unknown982	0.0419656	0.119106	18	6	2328.86	0.644577	1	20	6	9644	0.124703	0.277272	19	6.01667	5923.43	4061.04	0.685589	2433	1577	3920	4365	5757	16159	9635	7025	4211	3563	2659	3762	3183	4199	9656	4797	5431.31
Cer 26:1;2O|Cer 14:1;2O/12:0	0.0499351	0.13655	24	15	166.17	0.309082	0.900865	28	17.9999	728	0.0798122	0.237758	26	16.4821	599.513	123.121	0.205368	313	364	387	388	625	785	554	477	789	467	1040	533	868	789	664	591	602.125
[truncated: 1 more rows]

## Sheet: uni cycling suagrAS in sugarAM
CycID	JTK_pvalue	JTK_BH.Q	JTK_period	JTK_adjphase	JTK_amplitude	LS_pvalue	LS_BH.Q	LS_period	LS_adjphase	LS_amplitude	meta2d_pvalue	meta2d_BH.Q	meta2d_period	meta2d_phase	meta2d_Base	meta2d_AMP	meta2d_rAMP	0	0.1	0.2	0.3	6	6.1	6.2	6.3	12	12.1	12.2	12.3	18	18.1	18.2	18.3	SugarM
[truncated: 663 more rows]

[truncated: 5 more sheets: shared cycling in suagrAM AS, 0.5 cycling in sugarAM, 0.5 cycling in sugarAS, total AM, total AS]
